# Supplementary material for: Myristoylated Neuronal Calcium Sensor-1 captures the preciliary vesicle at distal appendages
Source: eLife journal article supplement (doi:10.7554/elife.85998), 2025-01-30

Figure 1D\_GFP

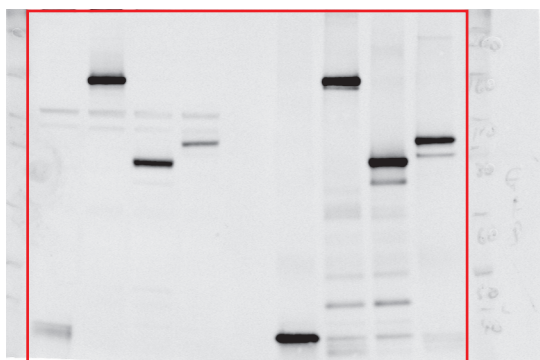

Figure 1D\_NCS1

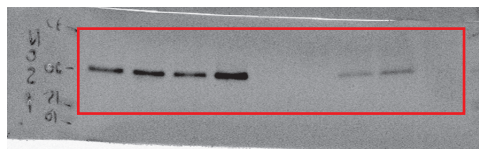

Figure 1D\_Tubulin

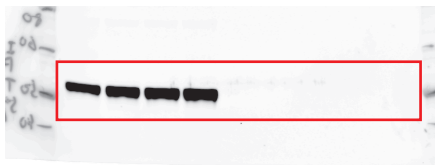

Figure 1E\_anti-MYC

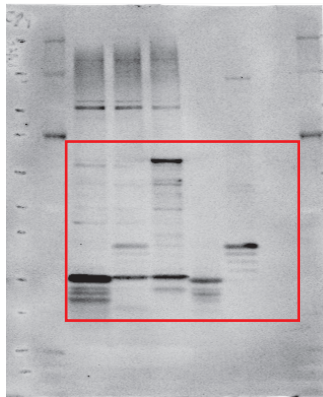

Figure 1E\_anti-HA

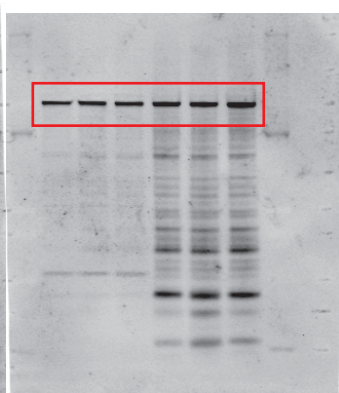

Figure 1F\_anti-MYC

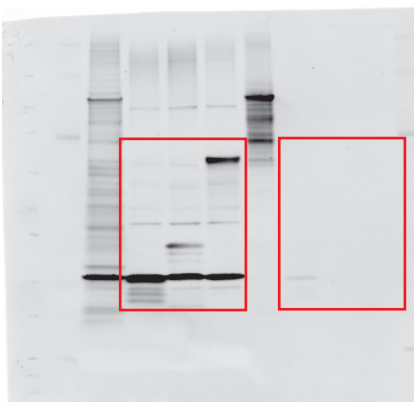

Figure 1F\_anti-HA

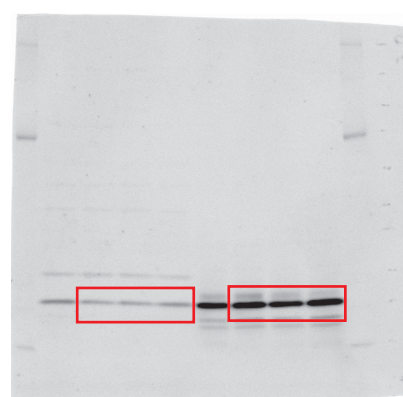

Figure 1-figure supplement 1A\_CEP89

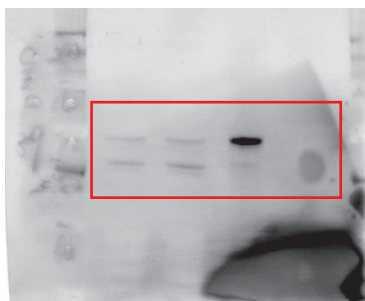

Figure 1-figure supplement 1A\_NCS1

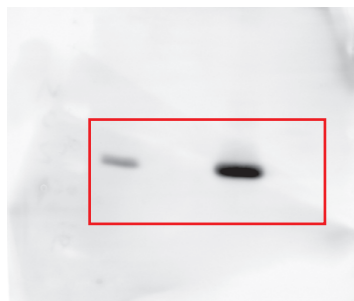

Figure 1-figure supplement 2A\_MYC

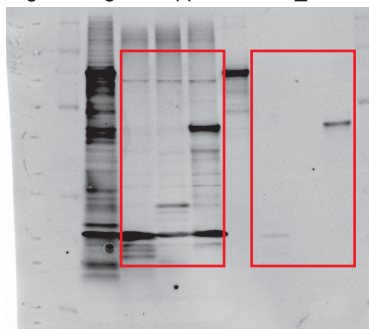

Figure 1-figure supplement 2A\_HA

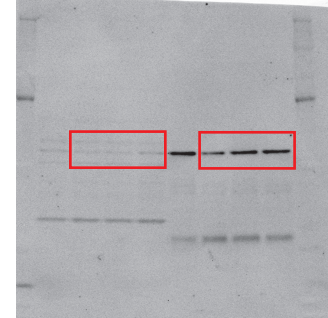

Figure 2-figure supplement 2D\_anti-CEP89

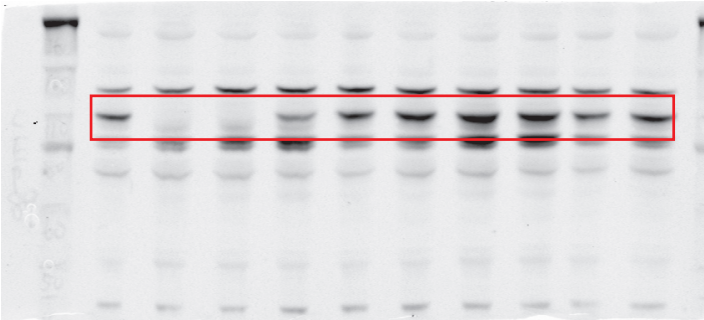

Figure 2-figure supplement 2D\_anti-NCS1

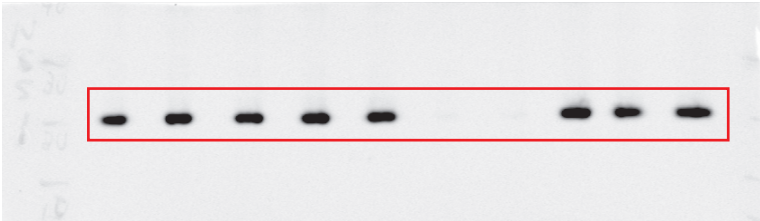

Figure 2-figure supplement 2D\_anti-Tubulin

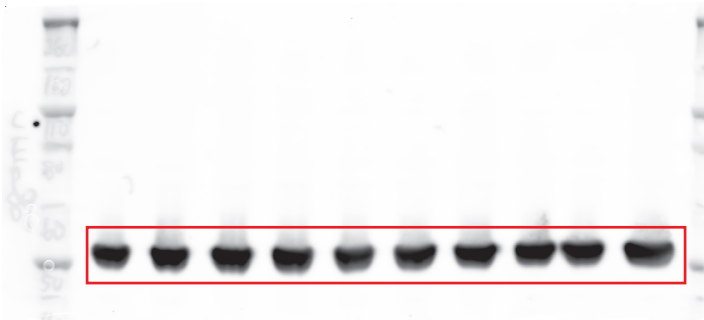

Figure 2-figure supplement 2E\_anti-GFP

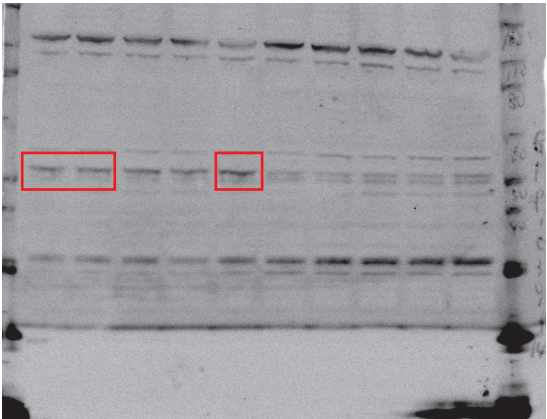

Figure 2-figure supplement 2E\_anti-Tubulin

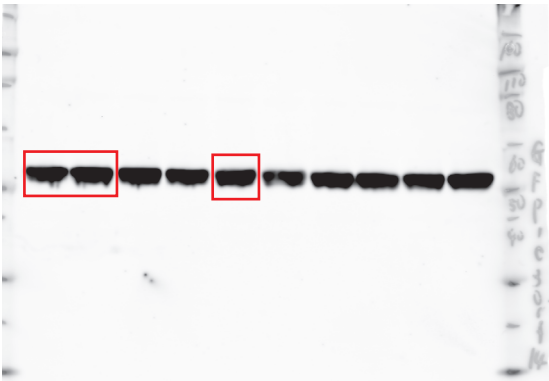

Figure 4A\_anti-NCS1

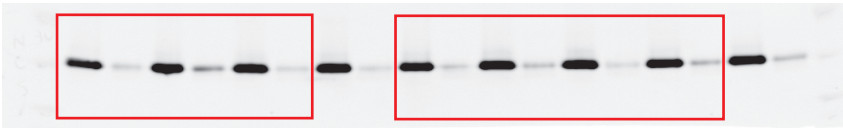

Figure 4A\_anti-Tubulin

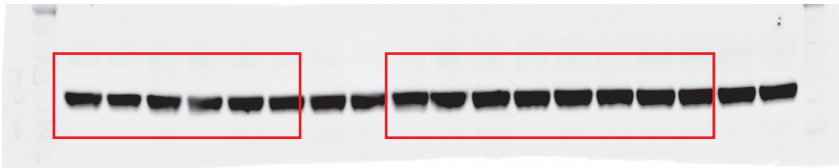

Figure 5A\_CEP89

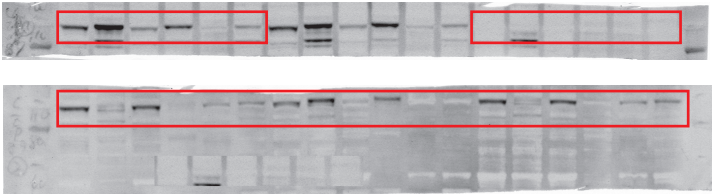

Figure 5A\_NCS1

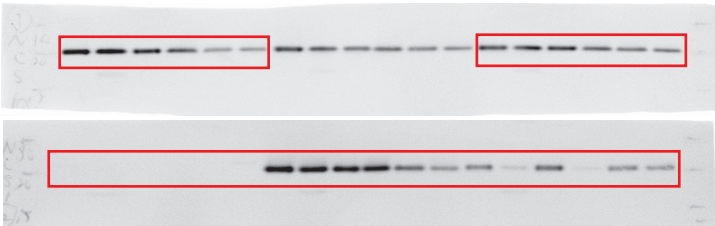

Figure 5A\_EGFR

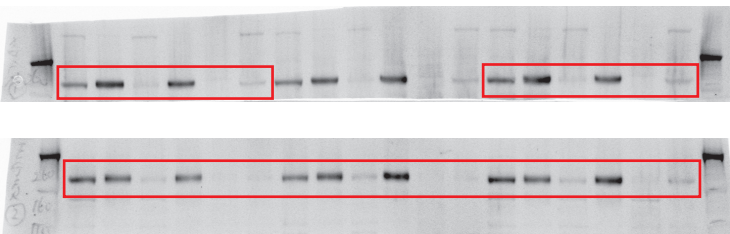

Figure 5A\_RabGDI

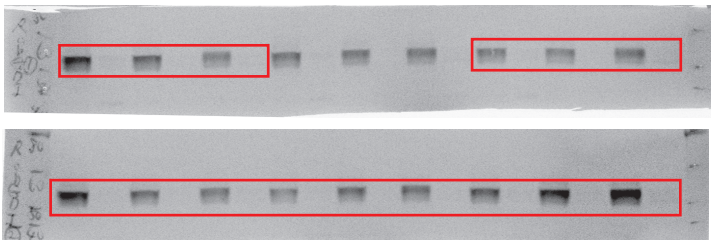



Figure 5B\_NCS1

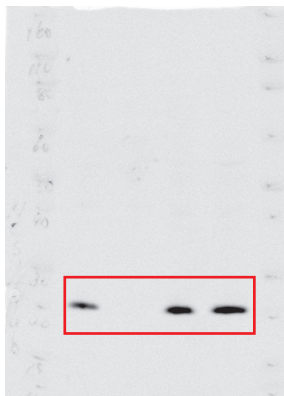

Figure 5B\_Tubulin

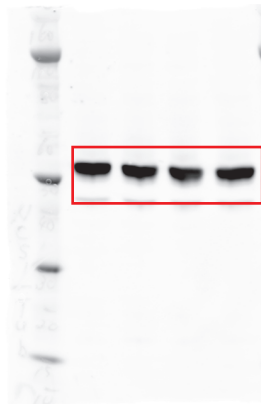

Figure 5-figure supplement 1A\_GFP (CEP89)

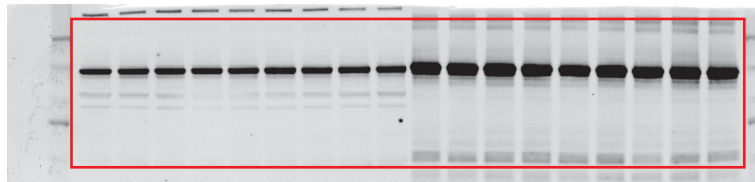

Figure 5-figure supplement 1A\_NCS1

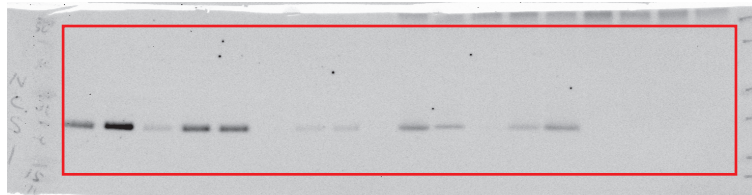

Figure 7-figure supplement 1A\_NCS1

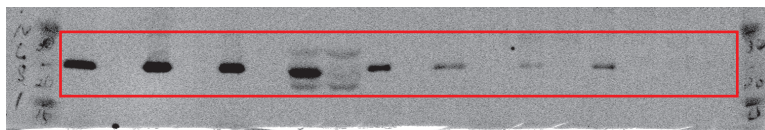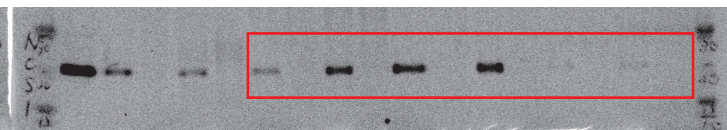

Figure 7-figure supplement 1A\_IFT88

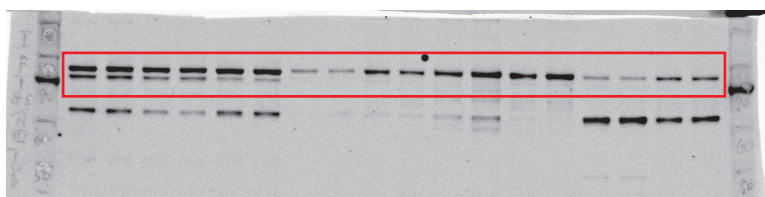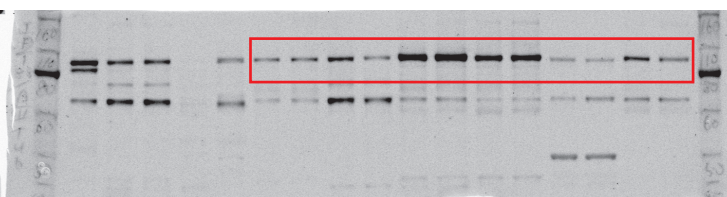

Figure 7-figure supplement 1A\_α-Tub

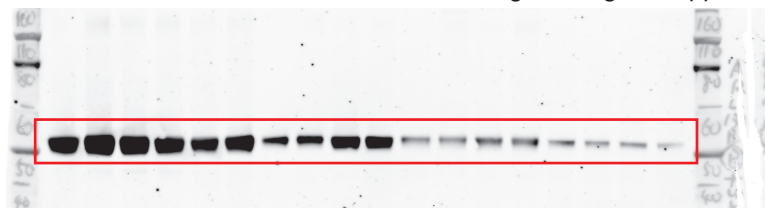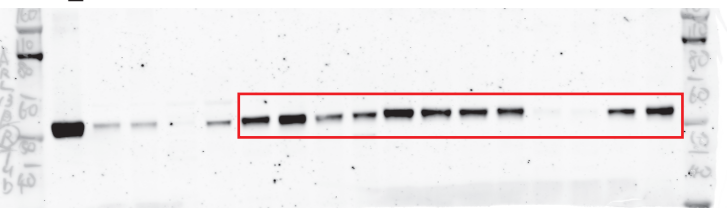

Figure 7-figure supplement 1A\_β-TubIII

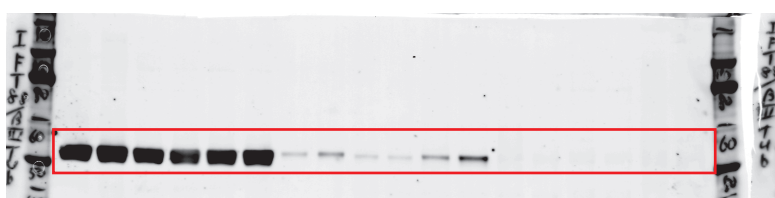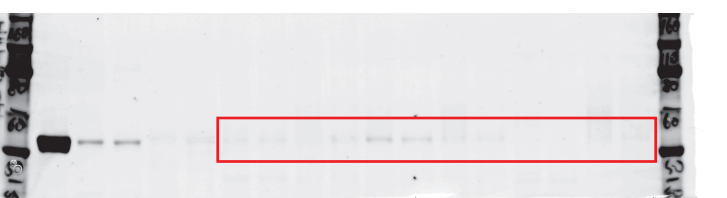

Supplement: data6 [file elife-85998-data6-v2.pdf]
