# Supplementary material for: Myristoylated Neuronal Calcium Sensor-1 captures the preciliary vesicle at distal appendages
Source: eLife journal article supplement (doi:10.7554/elife.85998), 2025-01-30

Figure 1D\_GFP

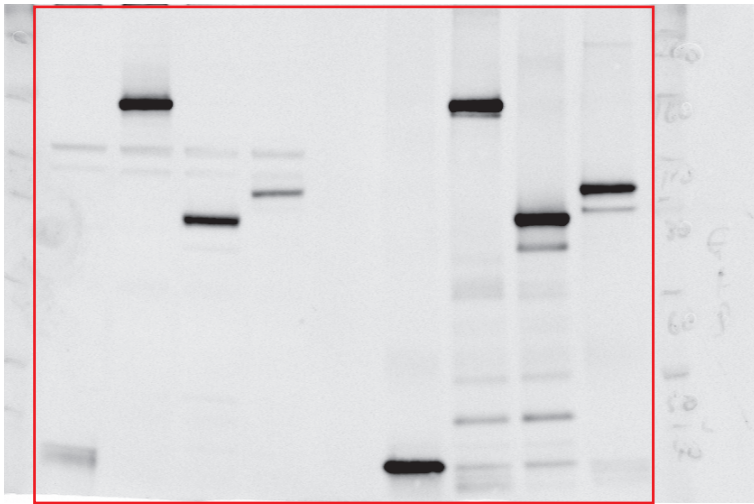

Figure 1D\_NCS1

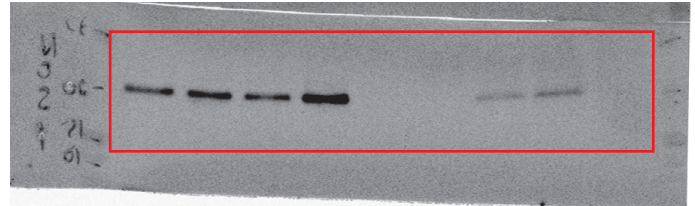

Figure 1D\_Tubulin

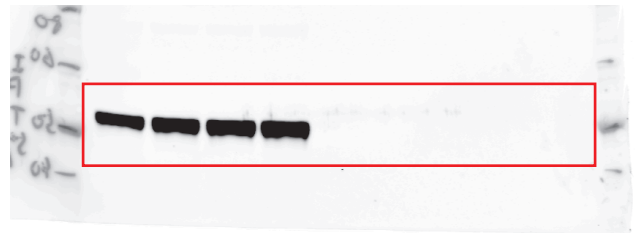

Supplement: fig1-data4 [file elife-85998-fig1-data4-v2.pdf]
