# Supplementary material for: Myristoylated Neuronal Calcium Sensor-1 captures the preciliary vesicle at distal appendages
Source: eLife journal article supplement (doi:10.7554/elife.85998), 2025-01-30

Figure 1-figure supplement 2A\_MYC

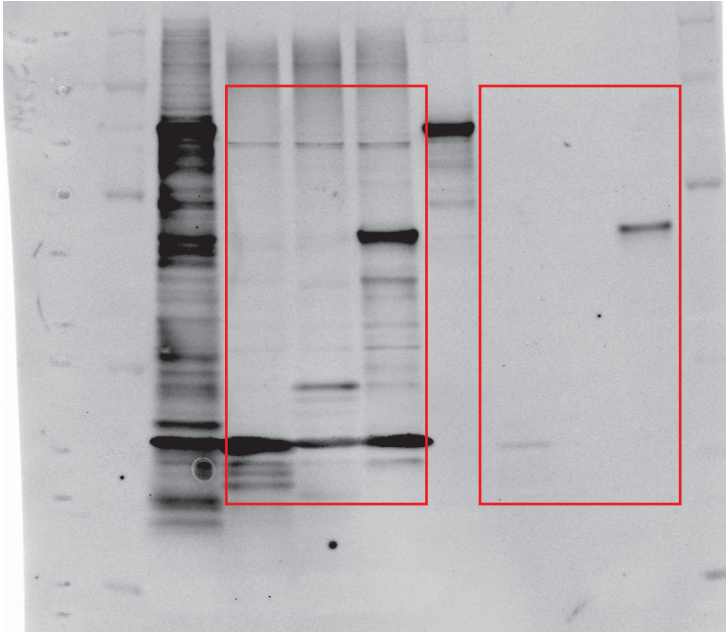

Figure 1-figure supplement 2A\_HA

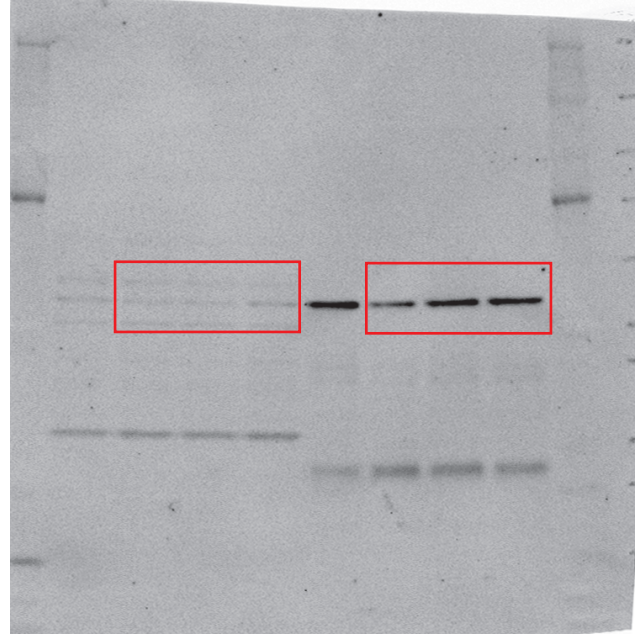

Supplement: fig1-figsupp2-data2 [file elife-85998-fig1-figsupp2-data2-v2.pdf]
