# Supplementary material for: Myristoylated Neuronal Calcium Sensor-1 captures the preciliary vesicle at distal appendages
Source: eLife journal article supplement (doi:10.7554/elife.85998), 2025-01-30

Figure 2-figure supplement 2D\_anti-CEP89

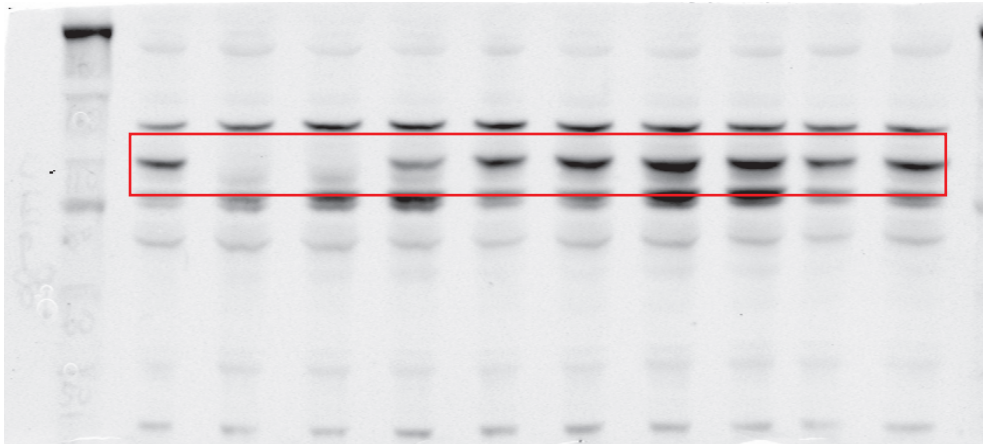

Figure 2-figure supplement 2D\_anti-NCS1

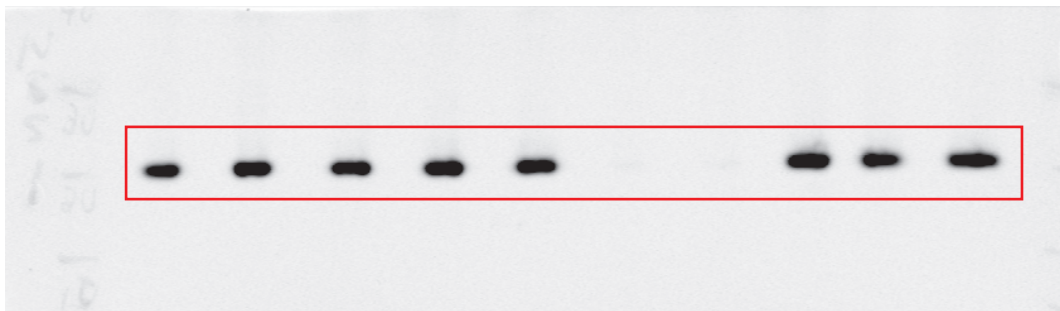

Figure 2-figure supplement 2D\_anti-Tubulin

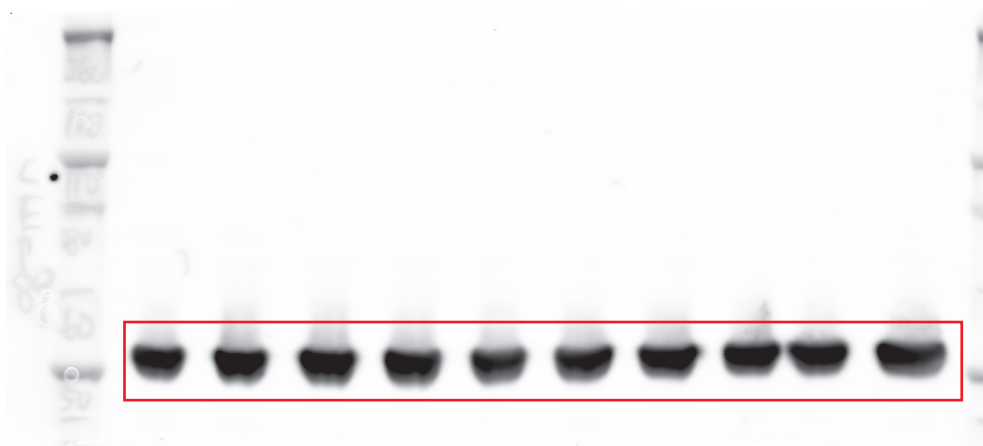

Supplement: fig2-figsupp2-data5 [file elife-85998-fig2-figsupp2-data5-v2.pdf]
