# Supplementary material for: Myristoylated Neuronal Calcium Sensor-1 captures the preciliary vesicle at distal appendages
Source: eLife journal article supplement (doi:10.7554/elife.85998), 2025-01-30

Figure 5A\_CEP89

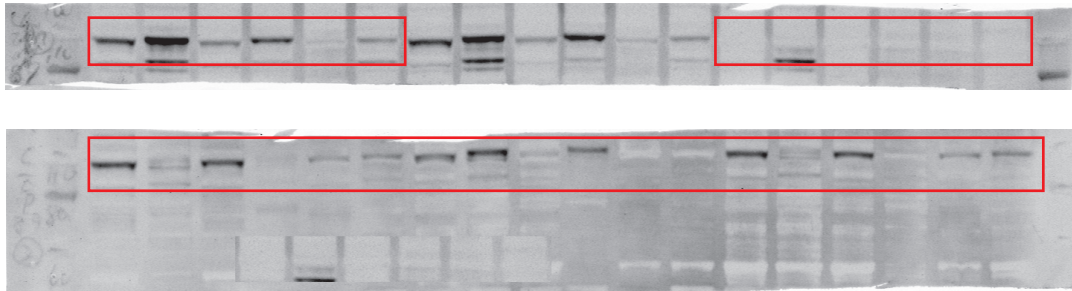

Figure 5A\_NCS1

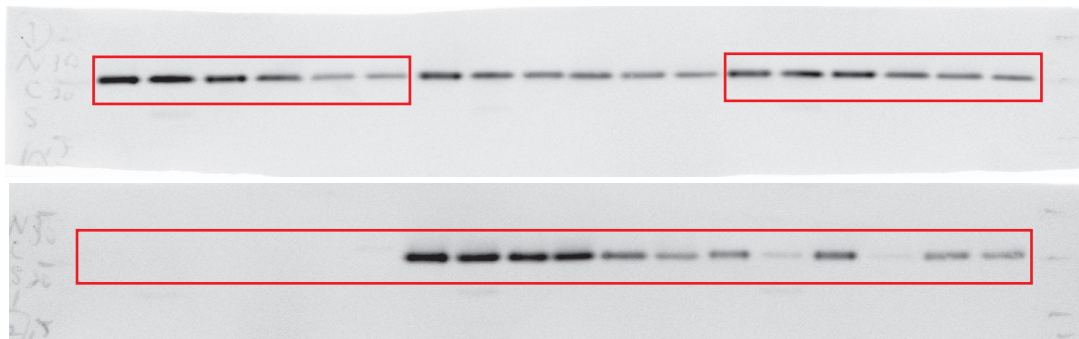

Figure 5A\_EGFR

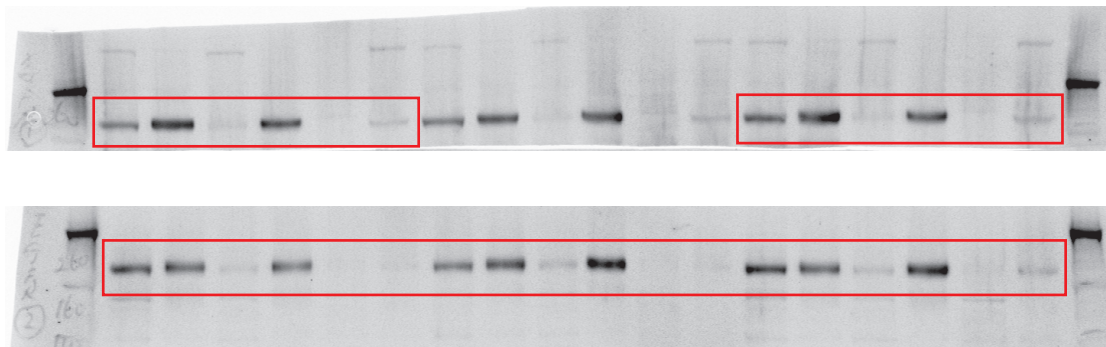

Figure 5A\_RabGDI

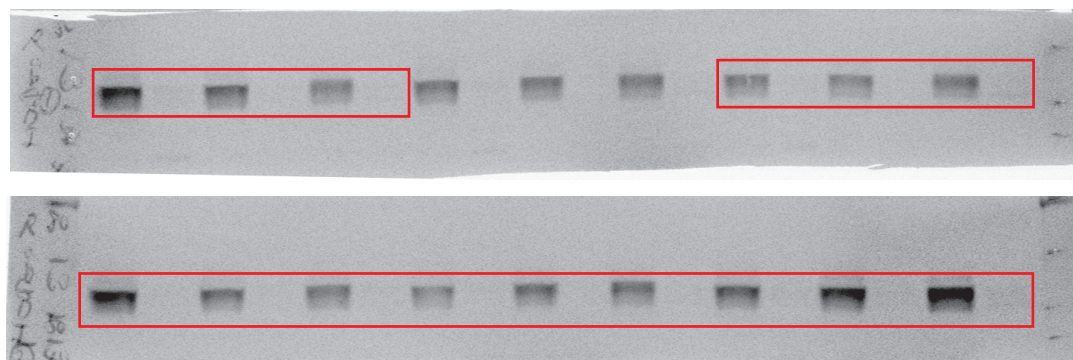

Supplement: fig5-data2 [file elife-85998-fig5-data2-v2.pdf]
