# Supplementary material for: Myristoylated Neuronal Calcium Sensor-1 captures the preciliary vesicle at distal appendages
Source: eLife journal article supplement (doi:10.7554/elife.85998), 2025-01-30

Figure 5-figure supplement 1A\_GFP (CEP89)

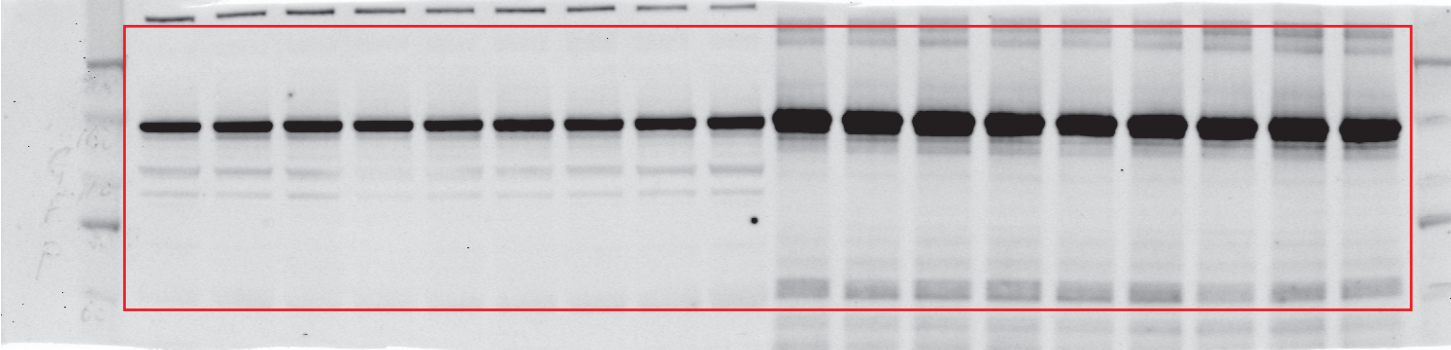

Figure 5-figure supplement 1A\_NCS1

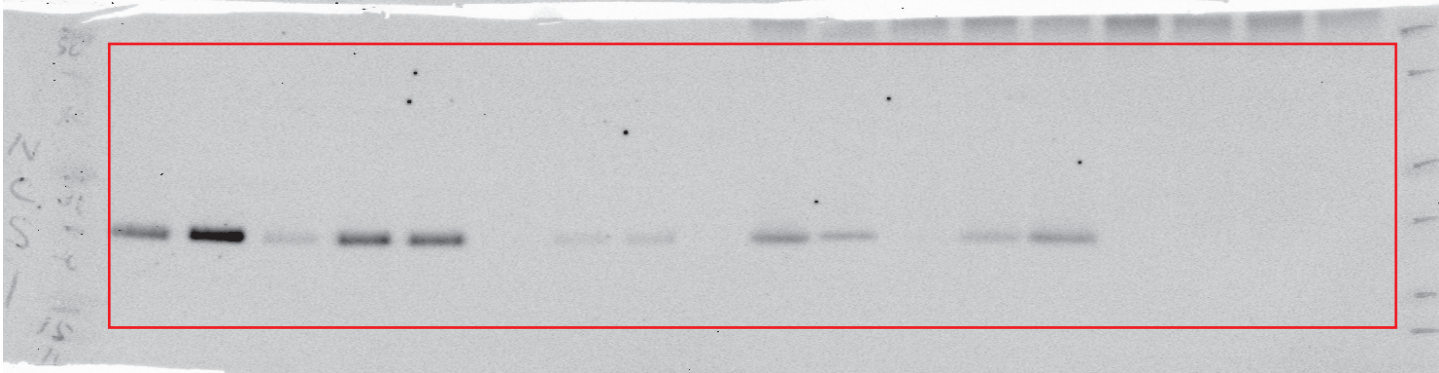

Supplement: fig5-figsupp1-data2 [file elife-85998-fig5-figsupp1-data2-v2.pdf]
