# Supplementary material for: Myristoylated Neuronal Calcium Sensor-1 captures the preciliary vesicle at distal appendages
Source: eLife. 2025 Jan 30;14:e85998. doi: 10.7554/eLife.85998 (PMC11984960; doi:10.7554/eLife.85998)
Supplement: Figure 1—figure supplement 1—source data 3. [file elife-85998-fig1-figsupp1-data3.xlsx]

## Sheet: IF condition
Exp. number	Cell line	Transgene	Fixation condition	rabbit-Alexa488	mouse IgG1-Alexa568	mouse IgG2b-Alexa647	Nuclear stain	Date	Replicate
KAN341-10	RPE-hTERT	pWPXLd-LAPN/puro-CEP89 WT	Fixed in 4% PFA/serum starvation for 24 hours	chicken anti GFP, Invitrogen, 1:1000	CEP170, Invitrogen, 41-3200, 1:1000	Ac-Tub, 6B-11, SIGMA, 1:2000	DAPI
KAN341-11	RPE-hTERT	pWPXLd-LAPN/puro-CEP89 1-343 a.a.	Fixed in 4% PFA/serum starvation for 24 hours	chicken anti GFP, Invitrogen, 1:1000	CEP170, Invitrogen, 41-3200, 1:1000	Ac-Tub, 6B-11, SIGMA, 1:2000	DAPI
KAN341-12	RPE-hTERT	pWPXLd-LAPN/puro-CEP89 344-783 a.a.	Fixed in 4% PFA/serum starvation for 24 hours	chicken anti GFP, Invitrogen, 1:1000	CEP170, Invitrogen, 41-3200, 1:1000	Ac-Tub, 6B-11, SIGMA, 1:2000	DAPI
KAN341-13	RPE-hTERT	pWPXLd-LAPN/DEST	Fixed in 4% PFA/serum starvation for 24 hours	chicken anti GFP, Invitrogen, 1:1000	CEP170, Invitrogen, 41-3200, 1:1000	Ac-Tub, 6B-11, SIGMA, 1:2000	DAPI
