# Supplementary material for: Myristoylated Neuronal Calcium Sensor-1 captures the preciliary vesicle at distal appendages
Source: eLife. 2025 Jan 30;14:e85998. doi: 10.7554/eLife.85998 (PMC11984960; doi:10.7554/eLife.85998)
Supplement: Figure 1—source data 2. [file elife-85998-fig1-data2.xlsx]

## Sheet: Global
Number	Protein Name	Cep89_01	Cep89_02	Cep89_03	Cep89_04	Cep89_05	Cep89_06	Cep89_07	Cep89_08	MAX	SUM
1	'>gi|47132620|ref|NP_000414.2| keratin, type II cytoskeletal 2 epidermal [Homo sapiens]'	1285	537	340	274	287	269	280	449	1285	3721
2	'>gi|195972866|ref|NP_000412.3| keratin, type I cytoskeletal 10 [Homo sapiens]'	1104	655	NaN	1	868	696	505	363	1104	4192
3	'>gi|119395750|ref|NP_006112.3| keratin, type II cytoskeletal 1 [Homo sapiens]'	830	584	487	523	840	491	18	367	840	4140
4	'>gi|50083293|ref|NP_116205.3| centrosomal protein of 89 kDa [Homo sapiens]'	49	132	357	833	559	291	148	60	833	2429
5	'>gi|530412176|ref|XP_005257400.1| PREDICTED: keratin, type I cytoskeletal 10 isoform X1 [Homo sapiens]'	NaN	NaN	547	568	NaN	NaN	NaN	1	568	1116
6	'>sp|K2C1_HUMAN|(Common contaminant protein)'	5	1	NaN	NaN	NaN	NaN	453	NaN	453	459
7	'>gi|5803225|ref|NP_006752.1| 14-3-3 protein epsilon [Homo sapiens]'	NaN	2	19	6	83	439	358	63	439	970
8	'>sp|TRYP_PIG|(Common contaminant protein)'	168	261	244	153	169	184	182	205	261	1566
9	'>gi|55956899|ref|NP_000217.2| keratin, type I cytoskeletal 9 [Homo sapiens]'	181	204	108	188	126	220	143	52	220	1222
10	'>gi|58530840|ref|NP_004406.2| desmoplakin isoform I [Homo sapiens]'	159	40	NaN	186	121	NaN	51	NaN	186	557
11	'>gi|12667788|ref|NP_002464.1| myosin-9 [Homo sapiens]'	4	182	102	50	2	NaN	NaN	NaN	182	340
12	'>gi|530389315|ref|XP_005251117.1| PREDICTED: 14-3-3 protein zeta/delta isoform X1 [Homo sapiens]'	3	2	NaN	14	33	180	6	26	180	264
13	'>gi|208973244|ref|NP_001129174.1| 14-3-3 protein zeta/delta [Homo sapiens]'	NaN	NaN	4	NaN	NaN	7	177	NaN	177	188
14	'>Reverse >gi|154240671|ref|NP_775760.3| maestro heat-like repeat-containing protein family member 2B [Homo sapiens]'	73	131	112	111	148	160	149	173	173	1057
15	'>gi|57013276|ref|NP_006073.2| tubulin alpha-1B chain [Homo sapiens]'	NaN	NaN	NaN	NaN	167	51	16	NaN	167	234
16	'>gi|29788785|ref|NP_821133.1| tubulin beta chain isoform b [Homo sapiens]'	NaN	NaN	9	1	160	35	29	18	160	252
17	'>gi|160420317|ref|NP_001104026.1| filamin-A isoform 2 [Homo sapiens]'	8	154	12	13	NaN	NaN	NaN	NaN	154	187
18	'>gi|61743954|ref|NP_001611.1| neuroblast differentiation-associated protein AHNAK isoform 1 [Homo sapiens]'	103	134	77	78	24	NaN	NaN	NaN	134	416
19	'>gi|21464101|ref|NP_036611.2| 14-3-3 protein gamma [Homo sapiens]'	NaN	18	8	12	22	132	131	9	132	332
20	'>gi|4507951|ref|NP_003396.1| 14-3-3 protein eta [Homo sapiens]'	NaN	4	5	7	24	105	132	11	132	288
21	'>gi|15431310|ref|NP_000517.2| keratin, type I cytoskeletal 14 [Homo sapiens]'	109	61	57	97	127	71	85	22	127	629
22	'>gi|19718759|ref|NP_579899.1| myoferlin isoform b [Homo sapiens]'	NaN	114	72	NaN	6	NaN	NaN	NaN	114	192
23	'>gi|119703753|ref|NP_005546.2| keratin, type II cytoskeletal 6B [Homo sapiens]'	46	51	34	58	110	25	65	25	110	414
24	'>gi|116805322|ref|NP_001449.3| filamin-C isoform a [Homo sapiens]'	NaN	107	NaN	NaN	NaN	NaN	NaN	NaN	107	107
25	'>gi|62122917|ref|NP_001014364.1| filaggrin-2 [Homo sapiens]'	53	3	4	20	39	15	25	105	105	264
26	'>gi|17738308|ref|NP_055101.2| neuronal calcium sensor 1 isoform 1 [Homo sapiens]'	NaN	NaN	NaN	NaN	7	21	102	18	102	148
27	'>gi|119395754|ref|NP_000415.2| keratin, type II cytoskeletal 5 [Homo sapiens]'	71	44	49	79	96	89	53	54	96	535
28	'>gi|42822864|ref|NP_976322.1| ribonuclease inhibitor [Homo sapiens]'	NaN	NaN	NaN	4	83	33	NaN	NaN	83	120
29	'>gi|5803227|ref|NP_006817.1| 14-3-3 protein theta [Homo sapiens]'	NaN	5	2	1	17	76	67	5	76	173
30	'>gi|544063468|ref|NP_001269555.1| lamin isoform A-delta50 [Homo sapiens]'	NaN	NaN	NaN	71	13	1	1	NaN	71	86
31	'>gi|60097902|ref|NP_002007.1| filaggrin [Homo sapiens]'	14	NaN	NaN	69	10	NaN	4	6	69	103
32	'>gi|4506787|ref|NP_003861.1| ras GTPase-activating-like protein IQGAP1 [Homo sapiens]'	NaN	18	69	15	NaN	NaN	NaN	NaN	69	102
33	'>gi|16933542|ref|NP_002017.1| fibronectin isoform 3 preproprotein [Homo sapiens]'	NaN	68	1	NaN	NaN	NaN	NaN	NaN	68	69
34	'>gi|12025678|ref|NP_004915.2| alpha-actinin-4 [Homo sapiens]'	NaN	NaN	3	65	3	NaN	NaN	NaN	65	71
35	'>gi|115527082|ref|NP_005954.3| myosin-1 [Homo sapiens]'	4	64	NaN	NaN	NaN	NaN	NaN	NaN	64	68
36	'>gi|568815719|ref|NP_001275582.1| clathrin heavy chain 1 isoform 2 [Homo sapiens]'	NaN	15	61	1	NaN	NaN	NaN	NaN	61	77
37	'>gi|223029410|ref|NP_006280.3| talin-1 [Homo sapiens]'	NaN	61	NaN	NaN	NaN	NaN	NaN	NaN	61	61
38	'>gi|4507949|ref|NP_003395.1| 14-3-3 protein beta/alpha [Homo sapiens]'	NaN	NaN	NaN	NaN	NaN	61	NaN	NaN	61	61
39	'>gi|24430192|ref|NP_005548.2| keratin, type I cytoskeletal 16 [Homo sapiens]'	25	18	9	40	60	20	29	5	60	206
40	'''>gi|76496475|ref|NP_001029031.1| very long-chain specific acyl-CoA dehydrogenase, mitochondrial isoform 2 precursor [Homo sapien...'' <Preview truncated at 128 characters>'	NaN	NaN	NaN	NaN	60	NaN	NaN	NaN	60	60
41	'>gi|224809474|ref|NP_001138994.1| ankycorbin isoform b [Homo sapiens]'	NaN	NaN	39	59	NaN	NaN	NaN	NaN	59	98
42	'>gi|578821405|ref|XP_006718611.1| PREDICTED: solute carrier family 22 member 10 isoform X6 [Homo sapiens]'	NaN	57	58	NaN	NaN	NaN	NaN	29	58	144
43	'>gi|4506773|ref|NP_002956.1| protein S100-A9 [Homo sapiens]'	6	4	7	41	57	32	47	46	57	240
44	'>gi|5902072|ref|NP_008850.1| serpin B3 [Homo sapiens]'	NaN	8	10	57	43	56	21	18	57	213
45	'>gi|119703744|ref|NP_001933.2| desmoglein-1 preproprotein [Homo sapiens]'	54	33	28	35	53	19	16	6	54	244
46	'>gi|33350932|ref|NP_001367.2| cytoplasmic dynein 1 heavy chain 1 [Homo sapiens]'	54	32	NaN	NaN	NaN	NaN	NaN	NaN	54	86
47	'>gi|21328448|ref|NP_647539.1| 14-3-3 protein beta/alpha [Homo sapiens]'	1	1	2	4	11	1	54	1	54	75
48	'>gi|45439327|ref|NP_002696.3| periplakin [Homo sapiens]'	3	NaN	3	54	NaN	NaN	NaN	NaN	54	60
49	'>gi|533112491|ref|NP_001269210.1| pyrroline-5-carboxylate reductase 1, mitochondrial isoform 5 [Homo sapiens]'	NaN	NaN	NaN	NaN	3	54	NaN	NaN	54	57
50	'>gi|4501887|ref|NP_001605.1| actin, cytoplasmic 2 [Homo sapiens]'	13	10	14	53	NaN	NaN	13	12	53	115
51	'>gi|578830876|ref|XP_006721941.1| PREDICTED: junction plakoglobin isoform X9 [Homo sapiens]'	NaN	NaN	NaN	NaN	53	NaN	NaN	NaN	53	53
52	'>gi|41322919|ref|NP_958784.1| plectin isoform 1b [Homo sapiens]'	15	1	NaN	52	3	NaN	NaN	NaN	52	71
53	'>gi|19920317|ref|NP_006816.2| cytoskeleton-associated protein 4 [Homo sapiens]'	NaN	NaN	5	13	49	NaN	NaN	NaN	49	67
54	'>gi|194018511|ref|NP_778253.2| keratin, type II cytoskeletal 1b [Homo sapiens]'	48	18	6	6	28	7	17	14	48	144
55	'>gi|5454052|ref|NP_006133.1| 14-3-3 protein sigma [Homo sapiens]'	7	1	2	48	4	6	13	6	48	87
56	'>gi|54607014|ref|NP_002527.1| TBC1 domain family member 25 [Homo sapiens]'	NaN	NaN	NaN	NaN	NaN	42	47	43	47	132
57	'>gi|58530842|ref|NP_001008844.1| desmoplakin isoform II [Homo sapiens]'	NaN	NaN	16	NaN	2	47	NaN	24	47	89
58	'>gi|4557032|ref|NP_002291.1| L-lactate dehydrogenase B chain [Homo sapiens]'	7	12	16	21	45	34	29	6	45	170
59	'>gi|154146191|ref|NP_005339.3| heat shock protein HSP 90-alpha isoform 2 [Homo sapiens]'	NaN	5	11	45	5	NaN	NaN	NaN	45	66
60	'>gi|21614544|ref|NP_002955.2| protein S100-A8 [Homo sapiens]'	4	4	6	17	18	16	22	44	44	131
61	'>gi|578821403|ref|XP_006718610.1| PREDICTED: solute carrier family 22 member 10 isoform X5 [Homo sapiens]'	NaN	NaN	NaN	32	NaN	44	NaN	NaN	44	76
62	'>gi|118601070|ref|NP_981953.2| protein FAM47A [Homo sapiens]'	22	32	43	41	36	20	35	27	43	256
63	'>gi|88501740|ref|NP_008963.3| TRIO and F-actin-binding protein isoform 1 [Homo sapiens]'	NaN	NaN	NaN	NaN	43	NaN	NaN	NaN	43	43
64	'>gi|50845388|ref|NP_001002858.1| annexin A2 isoform 1 [Homo sapiens]'	30	9	7	37	NaN	42	18	23	42	166
65	'>gi|5729877|ref|NP_006588.1| heat shock cognate 71 kDa protein isoform 1 [Homo sapiens]'	NaN	NaN	NaN	42	NaN	NaN	NaN	NaN	42	42
66	'>gi|223278387|ref|NP_059118.2| calmodulin-like protein 5 [Homo sapiens]'	6	8	12	40	16	12	11	10	40	115
67	'>gi|115298657|ref|NP_002954.2| protein S100-A7 [Homo sapiens]'	7	4	1	NaN	NaN	NaN	1	40	40	53
68	'>gi|155969707|ref|NP_004960.2| insulin-degrading enzyme isoform 1 [Homo sapiens]'	2	NaN	3	33	39	NaN	NaN	NaN	39	77
69	'>gi|62414289|ref|NP_003371.2| vimentin [Homo sapiens]'	NaN	NaN	NaN	NaN	38	2	NaN	NaN	38	40
70	'>gi|4503143|ref|NP_001900.1| cathepsin D preproprotein [Homo sapiens]'	26	8	6	21	20	36	32	19	36	168
71	'>gi|15618995|ref|NP_258259.1| keratin, type II cytoskeletal 71 [Homo sapiens]'	36	30	NaN	24	NaN	2	27	19	36	138
72	'>gi|4504811|ref|NP_002221.1| junction plakoglobin [Homo sapiens]'	34	8	8	36	NaN	NaN	32	13	36	131
73	'>gi|19743813|ref|NP_002202.2| integrin beta-1 isoform 1A precursor [Homo sapiens]'	NaN	3	32	36	NaN	NaN	NaN	NaN	36	71
74	'>P00366|DHE3_BOVIN Glutamate dehydrogenase 1, mitochondrial - Bos taurus (Bovine).(Common contaminant protein)'	NaN	NaN	27	35	31	NaN	NaN	NaN	35	93
75	'>gi|6005942|ref|NP_009057.1| transitional endoplasmic reticulum ATPase [Homo sapiens]'	NaN	NaN	NaN	35	1	NaN	NaN	NaN	35	36
76	'>gi|444909176|ref|NP_001263303.1| WD repeat-containing protein 38 isoform 1 [Homo sapiens]'	8	25	22	17	33	30	31	34	34	200
77	'>gi|530369054|ref|XP_005263656.1| PREDICTED: tubulin--tyrosine ligase isoform X1 [Homo sapiens]'	8	25	22	17	32	29	30	34	34	197
78	'>gi|4501885|ref|NP_001092.1| actin, cytoplasmic 1 [Homo sapiens]'	NaN	NaN	NaN	NaN	34	28	NaN	NaN	34	62
79	'>gi|4757756|ref|NP_004030.1| annexin A2 isoform 2 [Homo sapiens]'	NaN	NaN	NaN	NaN	34	NaN	NaN	NaN	34	34
80	'>gi|4504985|ref|NP_002298.1| galectin-7 [Homo sapiens]'	6	2	4	32	8	10	16	24	32	102
81	'>gi|5032009|ref|NP_005600.1| glycogen phosphorylase, muscle form isoform 1 [Homo sapiens]'	NaN	6	26	32	NaN	NaN	NaN	NaN	32	64
82	'>gi|16751921|ref|NP_444513.1| dermcidin isoform 1 preproprotein [Homo sapiens]'	22	31	14	22	12	18	27	18	31	164
83	'>gi|89357932|ref|NP_775487.2| keratin, type II cytoskeletal 78 isoform 1 [Homo sapiens]'	31	11	4	6	22	5	7	4	31	90
84	'>gi|4507877|ref|NP_003364.1| vinculin isoform VCL [Homo sapiens]'	6	9	31	13	1	NaN	NaN	NaN	31	60
85	'>gi|53729346|ref|NP_000290.2| plakophilin-1 isoform 1b [Homo sapiens]'	NaN	NaN	NaN	31	9	NaN	NaN	NaN	31	40
86	'>gi|393715091|ref|NP_001257328.1| tubulin alpha-1A chain isoform 1 [Homo sapiens]'	NaN	NaN	NaN	NaN	31	NaN	NaN	NaN	31	31
87	'>gi|530402379|ref|XP_005266453.1| PREDICTED: LIM domain only protein 7 isoform X22 [Homo sapiens]'	NaN	NaN	30	NaN	NaN	NaN	NaN	NaN	30	30
88	'>gi|576583524|ref|NP_001276675.1| glyceraldehyde-3-phosphate dehydrogenase isoform 1 [Homo sapiens]'	17	9	9	29	29	28	21	15	29	157
89	'>gi|4507475|ref|NP_000350.1| protein-glutamine gamma-glutamyltransferase K [Homo sapiens]'	11	NaN	NaN	NaN	29	10	11	3	29	64
90	'>gi|213511508|ref|NP_001132929.1| B-cell receptor-associated protein 31 isoform a [Homo sapiens]'	NaN	NaN	NaN	9	NaN	17	29	NaN	29	55
91	'>gi|4503571|ref|NP_001419.1| alpha-enolase isoform 1 [Homo sapiens]'	NaN	NaN	1	29	11	5	7	NaN	29	53
92	'>gi|4758988|ref|NP_004152.1| ras-related protein Rab-1A isoform 1 [Homo sapiens]'	NaN	NaN	NaN	NaN	3	11	29	2	29	45
93	'>gi|530412116|ref|XP_005257370.1| PREDICTED: junction plakoglobin isoform X1 [Homo sapiens]'	NaN	NaN	NaN	NaN	NaN	29	NaN	NaN	29	29
94	'>gi|6912286|ref|NP_036246.1| caspase-14 precursor [Homo sapiens]'	16	8	8	25	20	24	26	28	28	155
95	'>gi|578835525|ref|XP_006723678.1| PREDICTED: protein-glutamine gamma-glutamyltransferase E isoform X1 [Homo sapiens]'	NaN	10	11	20	23	13	28	16	28	121
96	'>gi|19923231|ref|NP_002860.2| ras-related protein Rab-6A isoform a [Homo sapiens]'	NaN	NaN	NaN	NaN	NaN	NaN	28	NaN	28	28
97	'>Reverse >gi|401709935|ref|NP_001257906.1| IST1 homolog isoform d [Homo sapiens]'	4	4	6	22	18	25	25	27	27	131
98	'>gi|156104874|ref|NP_001979.2| envoplakin [Homo sapiens]'	NaN	NaN	NaN	27	NaN	NaN	NaN	NaN	27	27
99	'>gi|21361454|ref|NP_037460.2| pyrroline-5-carboxylate reductase 2 isoform 1 [Homo sapiens]'	NaN	NaN	NaN	NaN	NaN	27	NaN	NaN	27	27
100	'>gi|354983493|ref|NP_001238978.1| protein-L-isoaspartate(D-aspartate) O-methyltransferase isoform 2 [Homo sapiens]'	NaN	NaN	NaN	NaN	NaN	NaN	27	NaN	27	27
101	'>Reverse >gi|45643131|ref|NP_996668.1| protein OSCP1 isoform 2 [Homo sapiens]'	NaN	20	26	NaN	NaN	NaN	22	15	26	83
102	'>Reverse >gi|167234419|ref|NP_005110.2| thyroid hormone receptor-associated protein 3 [Homo sapiens]'	NaN	NaN	NaN	NaN	NaN	26	24	NaN	26	50
103	'>gi|56090582|ref|NP_001007562.1| immunity-related GTPase family Q protein [Homo sapiens]'	NaN	NaN	14	NaN	26	NaN	NaN	NaN	26	40
104	'>gi|334191701|ref|NP_001229268.1| ATP-dependent 6-phosphofructokinase, platelet type isoform 2 [Homo sapiens]'	NaN	NaN	NaN	8	26	NaN	NaN	NaN	26	34
105	'>gi|530365262|ref|XP_005245488.1| PREDICTED: protein S100-A7 isoform X1 [Homo sapiens]'	NaN	NaN	NaN	25	17	25	21	3	25	91
106	'>gi|110611220|ref|NP_004578.2| ribosome-binding protein 1 [Homo sapiens]'	NaN	10	25	2	NaN	NaN	NaN	NaN	25	37
107	'>gi|574584816|ref|NP_001276058.1| tubulin beta-4A chain isoform 3 [Homo sapiens]'	NaN	NaN	NaN	NaN	25	NaN	NaN	NaN	25	25
108	'>gi|223468597|ref|NP_001138472.1| integrin alpha-V isoform 3 precursor [Homo sapiens]'	NaN	NaN	24	7	NaN	3	2	NaN	24	36
109	'>gi|189458821|ref|NP_003236.3| protein-glutamine gamma-glutamyltransferase E [Homo sapiens]'	24	NaN	NaN	NaN	NaN	NaN	NaN	NaN	24	24
110	'>gi|57864582|ref|NP_001009931.1| hornerin [Homo sapiens]'	13	18	15	23	5	16	14	3	23	107
111	'>gi|13435361|ref|NP_077739.1| desmocollin-1 isoform Dsc1a preproprotein [Homo sapiens]'	23	16	NaN	15	18	8	9	4	23	93
112	'>gi|16507237|ref|NP_005338.1| 78 kDa glucose-regulated protein precursor [Homo sapiens]'	NaN	NaN	NaN	23	4	NaN	NaN	NaN	23	27
113	'>Reverse >gi|481026589|ref|NP_001264747.1| YTH domain-containing family protein 3 isoform c [Homo sapiens]'	NaN	NaN	NaN	NaN	23	NaN	NaN	NaN	23	23
114	'>gi|88702793|ref|NP_612449.2| vasorin precursor [Homo sapiens]'	NaN	21	21	18	NaN	NaN	22	20	22	102
115	'>gi|4503471|ref|NP_001393.1| elongation factor 1-alpha 1 [Homo sapiens]'	NaN	4	8	17	22	10	8	8	22	77
116	'>gi|68563515|ref|NP_001020402.1| keratinocyte proline-rich protein [Homo sapiens]'	17	NaN	NaN	NaN	22	2	NaN	10	22	51
117	'>gi|31559829|ref|NP_853512.1| keratin, type I cytoskeletal 25 [Homo sapiens]'	7	22	3	3	2	NaN	NaN	NaN	22	37
118	'>gi|167466173|ref|NP_005337.2| heat shock 70 kDa protein 1A/1B [Homo sapiens]'	NaN	NaN	NaN	22	4	2	NaN	5	22	33
119	'>gi|190358517|ref|NP_004209.2| ras-related protein Rab-11B [Homo sapiens]'	NaN	NaN	NaN	NaN	NaN	5	22	NaN	22	27
120	'>gi|223718053|ref|NP_001138771.1| exocyst complex component 7 isoform 6 [Homo sapiens]'	NaN	NaN	NaN	NaN	22	NaN	NaN	NaN	22	22
121	'>gi|6006011|ref|NP_005492.1| integrin alpha-3 isoform b precursor [Homo sapiens]'	NaN	NaN	22	NaN	NaN	NaN	NaN	NaN	22	22
122	'>gi|431822408|ref|NP_001258901.1| heat shock protein HSP 90-beta isoform c [Homo sapiens]'	NaN	NaN	4	21	21	2	4	3	21	55
123	'>gi|44888833|ref|NP_056508.2| protein inturned [Homo sapiens]'	NaN	NaN	20	NaN	NaN	13	NaN	21	21	54
124	'>gi|37595530|ref|NP_004418.2| polyhomeotic-like protein 2 isoform b [Homo sapiens]'	NaN	17	21	NaN	NaN	NaN	15	NaN	21	53
125	'>gi|4757952|ref|NP_001782.1| cell division control protein 42 homolog isoform 1 precursor [Homo sapiens]'	NaN	NaN	NaN	NaN	NaN	NaN	21	NaN	21	21
126	'>gi|525507390|ref|NP_112598.3| epiplakin [Homo sapiens]'	NaN	NaN	NaN	20	NaN	7	8	6	20	41
127	'>gi|32189394|ref|NP_001677.2| ATP synthase subunit beta, mitochondrial precursor [Homo sapiens]'	NaN	NaN	NaN	20	17	NaN	NaN	NaN	20	37
128	'>gi|530373444|ref|XP_005265665.1| PREDICTED: ectonucleoside triphosphate diphosphohydrolase 3 isoform X4 [Homo sapiens]'	NaN	14	NaN	20	NaN	NaN	NaN	NaN	20	34
129	'>gi|42734430|ref|NP_036364.2| polymerase I and transcript release factor [Homo sapiens]'	NaN	NaN	NaN	NaN	20	6	NaN	NaN	20	26
130	'>gi|21396489|ref|NP_004784.2| lon protease homolog, mitochondrial isoform 1 precursor [Homo sapiens]'	NaN	NaN	5	20	NaN	NaN	NaN	NaN	20	25
131	'>gi|4506675|ref|NP_002941.1| dolichyl-diphosphooligosaccharide--protein glycosyltransferase subunit 1 precursor [Homo sapiens]'	NaN	NaN	NaN	3	20	NaN	NaN	NaN	20	23
132	'>gi|530412188|ref|XP_005257406.1| PREDICTED: keratin, type I cytoskeletal 17 isoform X1 [Homo sapiens]'	NaN	NaN	NaN	NaN	20	NaN	NaN	NaN	20	20
133	'>sp|ALBU_BOVIN|(Common contaminant protein)'	3	11	14	19	13	NaN	NaN	NaN	19	60
134	'>gi|346986435|ref|NP_001231367.1| arginase-1 isoform 1 [Homo sapiens]'	19	6	3	8	9	4	7	3	19	59
135	'>gi|4757810|ref|NP_004037.1| ATP synthase subunit alpha, mitochondrial isoform a precursor [Homo sapiens]'	NaN	NaN	NaN	12	19	NaN	NaN	NaN	19	31
136	'>gi|14389309|ref|NP_116093.1| tubulin alpha-1C chain [Homo sapiens]'	NaN	NaN	8	19	3	NaN	NaN	NaN	19	30
137	'>gi|153945728|ref|NP_005900.2| microtubule-associated protein 1B [Homo sapiens]'	NaN	19	NaN	NaN	3	6	NaN	NaN	19	28
138	'>gi|354983501|ref|NP_001238982.1| protein-L-isoaspartate(D-aspartate) O-methyltransferase isoform 1 [Homo sapiens]'	NaN	NaN	NaN	NaN	NaN	19	NaN	NaN	19	19
139	'>gi|578837531|ref|XP_006724440.1| PREDICTED: PRKCA-binding protein isoform X1 [Homo sapiens]'	NaN	NaN	NaN	NaN	19	NaN	NaN	NaN	19	19
140	'>gi|305632781|ref|NP_061886.2| protein FAM64A isoform 1 [Homo sapiens]'	NaN	NaN	3	4	NaN	18	12	NaN	18	37
141	'>gi|148596936|ref|NP_060372.2| hypoxia-inducible factor 1-alpha inhibitor [Homo sapiens]'	NaN	NaN	18	NaN	8	10	NaN	NaN	18	36
142	'>gi|51477721|ref|NP_001003811.1| testis-expressed sequence 11 protein isoform 1 [Homo sapiens]'	NaN	NaN	18	NaN	NaN	NaN	NaN	16	18	34
143	'>gi|148612803|ref|NP_778223.2| keratin, type II cytoskeletal 74 [Homo sapiens]'	NaN	NaN	11	NaN	18	NaN	NaN	NaN	18	29
144	'>gi|380837121|ref|NP_004883.3| vesicle-trafficking protein SEC22b precursor [Homo sapiens]'	NaN	NaN	NaN	NaN	NaN	7	18	2	18	27
145	'>gi|195976821|ref|NP_001123927.1| dysferlin isoform 2 [Homo sapiens]'	NaN	18	2	NaN	NaN	NaN	NaN	NaN	18	20
146	'>gi|126032350|ref|NP_001075109.1| DNA-dependent protein kinase catalytic subunit isoform 2 [Homo sapiens]'	NaN	18	NaN	NaN	NaN	NaN	NaN	NaN	18	18
147	'>gi|148536855|ref|NP_001091868.1| coatomer subunit alpha isoform 1 [Homo sapiens]'	NaN	NaN	18	NaN	NaN	NaN	NaN	NaN	18	18
148	'>gi|17402909|ref|NP_036233.2| tripartite motif-containing protein 29 [Homo sapiens]'	NaN	NaN	NaN	18	NaN	NaN	NaN	NaN	18	18
149	'>gi|384475528|ref|NP_001244958.1| gelsolin isoform d [Homo sapiens]'	NaN	NaN	NaN	18	NaN	NaN	NaN	NaN	18	18
150	'>gi|40805864|ref|NP_955392.1| tumor protein D54 isoform a [Homo sapiens]'	NaN	NaN	NaN	NaN	NaN	18	NaN	NaN	18	18
151	'>gi|5031839|ref|NP_005545.1| keratin, type II cytoskeletal 6A [Homo sapiens]'	6	5	6	7	17	8	8	NaN	17	57
152	'>gi|125628636|ref|NP_872313.2| keratin, type II cytoskeletal 80 isoform K80 [Homo sapiens]'	17	3	4	10	13	3	5	1	17	56
153	'>gi|332164781|ref|NP_001193728.1| pyruvate kinase PKM isoform f [Homo sapiens]'	7	NaN	NaN	17	11	2	NaN	2	17	39
154	'>gi|156766050|ref|NP_612429.2| protein AHNAK2 [Homo sapiens]'	3	17	7	NaN	NaN	NaN	NaN	NaN	17	27
155	'>gi|56237029|ref|NP_002196.2| integrin alpha-5 precursor [Homo sapiens]'	NaN	NaN	17	NaN	NaN	NaN	5	4	17	26
156	'>gi|62241042|ref|NP_004437.2| bifunctional glutamate/proline--tRNA ligase [Homo sapiens]'	NaN	NaN	17	2	NaN	NaN	NaN	NaN	17	19
157	'>gi|224586815|ref|NP_001139138.1| Golgi apparatus protein 1 isoform 2 precursor [Homo sapiens]'	NaN	NaN	17	NaN	NaN	NaN	NaN	NaN	17	17
158	'''>gi|351542238|ref|NP_001234925.1| arf-GAP with SH3 domain, ANK repeat and PH domain-containing protein 1 isoform 2 [Homo sapiens...'' <Preview truncated at 128 characters>'	NaN	NaN	17	NaN	NaN	NaN	NaN	NaN	17	17
159	'>gi|4506365|ref|NP_002856.1| ras-related protein Rab-2A isoform a [Homo sapiens]'	NaN	NaN	NaN	NaN	NaN	NaN	17	NaN	17	17
160	'>gi|45827806|ref|NP_056274.3| atlastin-3 isoform 1 [Homo sapiens]'	NaN	NaN	NaN	NaN	17	NaN	NaN	NaN	17	17
161	'>gi|4504517|ref|NP_001531.1| heat shock protein beta-1 [Homo sapiens]'	NaN	NaN	5	16	5	12	16	5	16	59
162	'>Reverse >gi|322302755|ref|NP_001189788.1| SHC-transforming protein 1 isoform 5 precursor [Homo sapiens]'	NaN	NaN	10	8	NaN	6	16	10	16	50
163	'>gi|24431935|ref|NP_065393.1| reticulon-4 isoform A [Homo sapiens]'	NaN	NaN	NaN	1	16	8	NaN	2	16	27
164	'>gi|260436922|ref|NP_001159506.1| suprabasin isoform 1 precursor [Homo sapiens]'	4	NaN	NaN	16	3	NaN	NaN	NaN	16	23
165	'>gi|32567786|ref|NP_787028.1| keratin, type II cytoskeletal 79 [Homo sapiens]'	4	NaN	NaN	NaN	16	NaN	NaN	NaN	16	20
166	'>gi|4504919|ref|NP_002264.1| keratin, type II cytoskeletal 8 isoform 2 [Homo sapiens]'	NaN	NaN	NaN	NaN	16	3	NaN	NaN	16	19
167	'>gi|4885111|ref|NP_005176.1| calmodulin-like protein 3 [Homo sapiens]'	NaN	1	NaN	16	1	1	NaN	NaN	16	19
168	'>gi|402478633|ref|NP_001257943.1| kinectin isoform d [Homo sapiens]'	NaN	NaN	16	NaN	NaN	NaN	NaN	NaN	16	16
169	'>gi|4502337|ref|NP_001176.1| zinc-alpha-2-glycoprotein precursor [Homo sapiens]'	11	15	12	11	12	9	8	4	15	82
170	'>gi|320461711|ref|NP_001189360.1| peroxiredoxin-1 [Homo sapiens]'	6	NaN	NaN	15	10	6	12	14	15	63
171	'>gi|28076869|ref|NP_002965.1| serpin B4 isoform 1 [Homo sapiens]'	5	2	2	15	14	13	3	4	15	58
172	'>gi|633257734|ref|NP_001278870.1| uncharacterized protein C3orf14 isoform a [Homo sapiens]'	NaN	NaN	NaN	NaN	NaN	2	11	15	15	28
173	'>Reverse >gi|148229134|ref|NP_057710.3| RNA-binding E3 ubiquitin-protein ligase MEX3C [Homo sapiens]'	NaN	NaN	NaN	NaN	11	NaN	NaN	15	15	26
174	'>gi|4758648|ref|NP_004512.1| kinesin-1 heavy chain [Homo sapiens]'	NaN	NaN	6	15	NaN	NaN	NaN	NaN	15	21
175	'>gi|60499025|ref|NP_001012533.1| ferrochelatase, mitochondrial isoform a precursor [Homo sapiens]'	NaN	NaN	NaN	NaN	5	15	NaN	NaN	15	20
176	'>gi|20070125|ref|NP_000909.2| protein disulfide-isomerase precursor [Homo sapiens]'	NaN	NaN	NaN	15	4	NaN	NaN	NaN	15	19
177	'>gi|24308201|ref|NP_065392.1| adipocyte plasma membrane-associated protein [Homo sapiens]'	NaN	NaN	NaN	NaN	15	3	NaN	NaN	15	18
178	'>gi|4503327|ref|NP_000389.1| NADH-cytochrome b5 reductase 3 isoform 1 [Homo sapiens]'	NaN	NaN	NaN	NaN	NaN	15	3	NaN	15	18
179	'>gi|34147513|ref|NP_004628.4| ras-related protein Rab-7a [Homo sapiens]'	NaN	NaN	NaN	1	NaN	NaN	15	NaN	15	16
180	'>gi|19557691|ref|NP_149351.1| surfeit locus protein 4 isoform 1 [Homo sapiens]'	NaN	NaN	NaN	NaN	NaN	NaN	15	NaN	15	15
181	'>gi|41399285|ref|NP_955472.1| 60 kDa heat shock protein, mitochondrial [Homo sapiens]'	NaN	NaN	NaN	NaN	15	NaN	NaN	NaN	15	15
182	'>gi|48255957|ref|NP_001675.3| plasma membrane calcium-transporting ATPase 4 isoform 4b [Homo sapiens]'	NaN	NaN	15	NaN	NaN	NaN	NaN	NaN	15	15
183	'>gi|4826702|ref|NP_004939.1| desmocollin-1 isoform Dsc1b preproprotein [Homo sapiens]'	NaN	NaN	15	NaN	NaN	NaN	NaN	NaN	15	15
184	'>gi|54607053|ref|NP_006827.1| translational activator GCN1 [Homo sapiens]'	NaN	15	NaN	NaN	NaN	NaN	NaN	NaN	15	15
185	'>gi|68051721|ref|NP_065843.3| neutral cholesterol ester hydrolase 1 isoform b [Homo sapiens]'	NaN	NaN	NaN	NaN	15	NaN	NaN	NaN	15	15
186	'>gi|32189392|ref|NP_005800.3| peroxiredoxin-2 [Homo sapiens]'	9	4	3	9	12	9	14	6	14	66
187	'>gi|193794853|ref|NP_079197.3| protein POF1B [Homo sapiens]'	9	NaN	NaN	11	14	4	NaN	NaN	14	38
188	'>gi|4502027|ref|NP_000468.1| serum albumin preproprotein [Homo sapiens]'	3	3	3	6	2	2	14	2	14	35
189	'>gi|1373325|gb|AAB08064.1| Enhanced Green Fluorescent Protein [Cloning vector pEGFP-N3](Common contaminant protein)'	NaN	NaN	14	3	NaN	2	7	NaN	14	26
190	'>gi|134142826|ref|NP_006188.3| pericentriolar material 1 protein [Homo sapiens]'	NaN	11	14	NaN	NaN	NaN	NaN	NaN	14	25
191	'>gi|66933005|ref|NP_001019820.1| calnexin precursor [Homo sapiens]'	NaN	NaN	3	7	14	NaN	NaN	NaN	14	24
192	'>gi|27894339|ref|NP_056330.3| keratin, type I cytoskeletal 23 isoform 1 [Homo sapiens]'	14	NaN	NaN	NaN	8	NaN	NaN	NaN	14	22
193	'>gi|4557305|ref|NP_000025.1| fructose-bisphosphate aldolase A isoform 1 [Homo sapiens]'	NaN	NaN	1	14	2	3	NaN	NaN	14	20
194	'>gi|24234686|ref|NP_694881.1| heat shock cognate 71 kDa protein isoform 2 [Homo sapiens]'	NaN	NaN	3	NaN	14	NaN	2	NaN	14	19
195	'>gi|578836330|ref|XP_006723981.1| PREDICTED: histone H2B type F-S-like [Homo sapiens]'	NaN	NaN	NaN	14	NaN	NaN	3	2	14	19
196	'>gi|134304853|ref|NP_004806.3| rho GTPase-activating protein 29 [Homo sapiens]'	NaN	NaN	14	2	1	NaN	NaN	NaN	14	17
197	'>gi|161702986|ref|NP_001104547.1| ezrin [Homo sapiens]'	NaN	NaN	NaN	14	NaN	NaN	NaN	NaN	14	14
198	'>gi|166795301|ref|NP_057381.3| prenylcysteine oxidase 1 precursor [Homo sapiens]'	NaN	NaN	NaN	NaN	14	NaN	NaN	NaN	14	14
199	'>gi|20127408|ref|NP_000173.2| trifunctional enzyme subunit alpha, mitochondrial precursor [Homo sapiens]'	NaN	NaN	NaN	NaN	14	NaN	NaN	NaN	14	14
200	'''>gi|209413738|ref|NP_001129243.1| dolichyl-diphosphooligosaccharide--protein glycosyltransferase subunit 2 isoform 2 precursor [...'' <Preview truncated at 128 characters>'	NaN	NaN	NaN	NaN	14	NaN	NaN	NaN	14	14
201	'>gi|27734709|ref|NP_775885.1| nodal modulator 2 isoform 2 precursor [Homo sapiens]'	NaN	NaN	14	NaN	NaN	NaN	NaN	NaN	14	14
202	'>gi|40354195|ref|NP_954657.1| keratin, type I cytoskeletal 18 [Homo sapiens]'	NaN	NaN	NaN	NaN	14	NaN	NaN	NaN	14	14
203	'>gi|567316172|ref|NP_001274528.1| THAP domain-containing protein 5 isoform 3 [Homo sapiens]'	9	13	13	11	2	13	6	10	13	77
204	'>gi|153945736|ref|NP_853515.2| keratin, type I cytoskeletal 27 [Homo sapiens]'	5	5	NaN	13	1	3	8	8	13	43
205	'>gi|197382472|ref|NP_001128119.1| actin filament-associated protein 1 isoform A [Homo sapiens]'	NaN	NaN	NaN	13	10	NaN	NaN	NaN	13	23
206	'>gi|10835049|ref|NP_001655.1| transforming protein RhoA precursor [Homo sapiens]'	NaN	NaN	NaN	NaN	NaN	4	13	4	13	21
207	'>gi|17986001|ref|NP_005505.2| major histocompatibility complex, class I, B precursor [Homo sapiens]'	NaN	NaN	NaN	NaN	5	13	NaN	NaN	13	18
208	'>gi|18379349|ref|NP_006364.2| synaptic vesicle membrane protein VAT-1 homolog [Homo sapiens]'	NaN	NaN	NaN	4	13	1	NaN	NaN	13	18
209	'>gi|28372503|ref|NP_542785.1| keratin, type II cytoskeletal 72 isoform 1 [Homo sapiens]'	3	1	NaN	1	NaN	13	NaN	NaN	13	18
210	'>gi|577019573|ref|NP_001276737.1| alpha-crystallin B chain [Homo sapiens]'	NaN	NaN	NaN	NaN	NaN	3	13	NaN	13	16
211	'>gi|167860126|ref|NP_002630.2| serpin B5 [Homo sapiens]'	NaN	NaN	NaN	13	NaN	NaN	NaN	NaN	13	13
212	'>gi|19913428|ref|NP_001684.2| V-type proton ATPase subunit B, brain isoform [Homo sapiens]'	NaN	NaN	NaN	NaN	13	NaN	NaN	NaN	13	13
213	'>gi|229093316|ref|NP_775813.2| putative phospholipase B-like 2 isoform 1 precursor [Homo sapiens]'	NaN	NaN	NaN	NaN	NaN	13	NaN	NaN	13	13
214	'>gi|296317244|ref|NP_001171725.1| extended synaptotagmin-1 isoform 1 [Homo sapiens]'	NaN	NaN	13	NaN	NaN	NaN	NaN	NaN	13	13
215	'>gi|4505763|ref|NP_000282.1| phosphoglycerate kinase 1 [Homo sapiens]'	NaN	NaN	NaN	13	NaN	NaN	NaN	NaN	13	13
216	'>gi|4507729|ref|NP_001060.1| tubulin beta-2A chain [Homo sapiens]'	NaN	NaN	NaN	NaN	13	NaN	NaN	NaN	13	13
217	'>gi|537544624|ref|NP_001269266.1| plastin-3 isoform 3 [Homo sapiens]'	NaN	NaN	NaN	13	NaN	NaN	NaN	NaN	13	13
218	'>gi|586798161|ref|NP_003706.2| general vesicular transport factor p115 isoform 2 [Homo sapiens]'	NaN	NaN	NaN	13	NaN	NaN	NaN	NaN	13	13
219	'>gi|156139141|ref|NP_001095841.1| FAD-dependent oxidoreductase domain-containing protein 2 precursor [Homo sapiens]'	NaN	7	7	NaN	12	NaN	NaN	12	12	38
220	'>gi|4504333|ref|NP_002099.1| histidine ammonia-lyase isoform 1 [Homo sapiens]'	7	NaN	1	NaN	12	5	4	3	12	32
221	'>gi|5031857|ref|NP_005557.1| L-lactate dehydrogenase A chain isoform 1 [Homo sapiens]'	NaN	NaN	NaN	12	4	8	2	6	12	32
222	'>gi|226529917|ref|NP_001152759.1| triosephosphate isomerase isoform 2 [Homo sapiens]'	4	NaN	NaN	12	NaN	5	6	1	12	28
223	'>gi|306966132|ref|NP_001182461.1| spectrin alpha chain, non-erythrocytic 1 isoform 3 [Homo sapiens]'	NaN	12	4	8	NaN	NaN	NaN	NaN	12	24
224	'>gi|5174735|ref|NP_006079.1| tubulin beta-4B chain [Homo sapiens]'	NaN	NaN	NaN	12	6	6	NaN	NaN	12	24
225	'>gi|4507879|ref|NP_003365.1| voltage-dependent anion-selective channel protein 1 [Homo sapiens]'	NaN	NaN	NaN	1	5	12	5	NaN	12	23
226	'>gi|74271845|ref|NP_653271.2| alpha-2-macroglobulin-like protein 1 isoform 1 precursor [Homo sapiens]'	NaN	NaN	NaN	12	5	NaN	NaN	5	12	22
227	'''>gi|206597522|ref|NP_001128663.1| arf-GAP with SH3 domain, ANK repeat and PH domain-containing protein 2 isoform b [Homo sapiens...'' <Preview truncated at 128 characters>'	NaN	NaN	NaN	NaN	NaN	12	7	NaN	12	19
228	'>gi|393715095|ref|NP_001257329.1| tubulin alpha-1A chain isoform 2 [Homo sapiens]'	2	3	NaN	NaN	NaN	1	NaN	12	12	18
229	'>gi|339639597|ref|NP_001229885.1| septin-7 isoform 3 [Homo sapiens]'	NaN	NaN	NaN	1	12	NaN	NaN	NaN	12	13
230	'>gi|4507677|ref|NP_003290.1| endoplasmin precursor [Homo sapiens]'	NaN	NaN	1	12	NaN	NaN	NaN	NaN	12	13
231	'>gi|19913424|ref|NP_001681.2| V-type proton ATPase catalytic subunit A [Homo sapiens]'	NaN	NaN	NaN	NaN	12	NaN	NaN	NaN	12	12
232	'>gi|237681109|ref|NP_001153705.1| sodium/potassium-transporting ATPase subunit alpha-1 isoform c [Homo sapiens]'	NaN	NaN	NaN	12	NaN	NaN	NaN	NaN	12	12
233	'>gi|301171467|ref|NP_001180345.1| ATP-dependent RNA helicase DDX3X isoform 2 [Homo sapiens]'	NaN	NaN	NaN	NaN	12	NaN	NaN	NaN	12	12
234	'>gi|354459354|ref|NP_001238850.1| ras-related protein Rap-1b isoform 3 [Homo sapiens]'	NaN	NaN	NaN	NaN	NaN	NaN	12	NaN	12	12
235	'>gi|5454158|ref|NP_006286.1| valine--tRNA ligase [Homo sapiens]'	NaN	NaN	12	NaN	NaN	NaN	NaN	NaN	12	12
236	'>gi|4557701|ref|NP_000413.1| keratin, type I cytoskeletal 17 [Homo sapiens]'	11	9	NaN	6	1	9	10	2	11	48
237	'>gi|13129018|ref|NP_076956.1| gamma-glutamylcyclotransferase isoform 1 [Homo sapiens]'	7	NaN	NaN	4	4	7	11	4	11	37
238	'>gi|4557581|ref|NP_001435.1| fatty acid-binding protein, epidermal [Homo sapiens]'	1	NaN	6	10	4	NaN	5	11	11	37
239	'>gi|77539758|ref|NP_001029249.1| histone H4 [Homo sapiens]'	3	3	NaN	11	NaN	NaN	3	8	11	28
240	'>gi|166158925|ref|NP_001107228.1| thymidine phosphorylase isoform 1 proprotein [Homo sapiens]'	NaN	NaN	NaN	11	11	NaN	2	NaN	11	24
241	'>gi|305632783|ref|NP_001182157.1| protein FAM64A isoform 2 [Homo sapiens]'	NaN	11	5	NaN	6	NaN	NaN	NaN	11	22
242	'>gi|4502679|ref|NP_001771.1| CD63 antigen isoform A [Homo sapiens]'	NaN	NaN	NaN	NaN	9	11	NaN	NaN	11	20
243	'''>gi|20070197|ref|NP_005207.2| dolichyl-diphosphooligosaccharide--protein glycosyltransferase 48 kDa subunit precursor [Homo sapi...'' <Preview truncated at 128 characters>'	NaN	NaN	NaN	NaN	11	8	NaN	NaN	11	19
244	'>gi|291621647|ref|NP_006311.2| membrane-associated progesterone receptor component 2 [Homo sapiens]'	NaN	NaN	NaN	NaN	NaN	7	11	NaN	11	18
245	'>gi|166795299|ref|NP_006507.2| solute carrier family 2, facilitated glucose transporter member 1 [Homo sapiens]'	NaN	NaN	NaN	NaN	11	6	NaN	NaN	11	17
246	'>gi|189458819|ref|NP_001121620.1| transferrin receptor protein 1 [Homo sapiens]'	NaN	NaN	NaN	11	6	NaN	NaN	NaN	11	17
247	'>gi|4503483|ref|NP_001952.1| elongation factor 2 [Homo sapiens]'	2	NaN	NaN	11	1	NaN	2	1	11	17
248	'>gi|403420580|ref|NP_001258142.1| sulfide:quinone oxidoreductase, mitochondrial [Homo sapiens]'	NaN	NaN	NaN	NaN	11	4	NaN	NaN	11	15
249	'>gi|372266129|ref|NP_001243194.1| protein flightless-1 homolog isoform 3 [Homo sapiens]'	NaN	NaN	11	NaN	3	NaN	NaN	NaN	11	14
250	'>gi|106775678|ref|NP_001035807.1| histone H2A type 2-A [Homo sapiens]'	NaN	NaN	NaN	11	NaN	NaN	NaN	1	11	12
251	'>gi|584458478|ref|NP_001276879.1| elongation factor 1-delta isoform 2 [Homo sapiens]'	NaN	NaN	NaN	1	NaN	11	NaN	NaN	11	12
252	'>gi|14210536|ref|NP_115914.1| tubulin beta-6 chain [Homo sapiens]'	NaN	NaN	NaN	NaN	11	NaN	NaN	NaN	11	11
253	'>gi|284807150|ref|NP_001165282.1| glucosylceramidase isoform 2 [Homo sapiens]'	NaN	NaN	NaN	NaN	11	NaN	NaN	NaN	11	11
254	'>gi|308818195|ref|NP_001184222.1| dihydropyrimidinase-related protein 2 isoform 1 [Homo sapiens]'	NaN	NaN	NaN	NaN	11	NaN	NaN	NaN	11	11
255	'>gi|31621305|ref|NP_573566.2| leucine-rich PPR motif-containing protein, mitochondrial precursor [Homo sapiens]'	NaN	NaN	11	NaN	NaN	NaN	NaN	NaN	11	11
256	'>gi|4758032|ref|NP_004757.1| coatomer subunit beta'' [Homo sapiens]'	NaN	NaN	NaN	11	NaN	NaN	NaN	NaN	11	11
257	'>gi|530415144|ref|XP_005260107.1| PREDICTED: ubiquitin-60S ribosomal protein L40 isoform X1 [Homo sapiens]'	NaN	NaN	11	NaN	NaN	NaN	NaN	NaN	11	11
258	'>gi|5730023|ref|NP_006657.1| ruvB-like 2 [Homo sapiens]'	NaN	NaN	NaN	NaN	11	NaN	NaN	NaN	11	11
259	'>gi|578801453|ref|XP_006711586.1| PREDICTED: tropomyosin alpha-3 chain isoform X9 [Homo sapiens]'	NaN	NaN	NaN	11	NaN	NaN	NaN	NaN	11	11
260	'>gi|58331171|ref|NP_001009186.1| T-complex protein 1 subunit zeta isoform b [Homo sapiens]'	NaN	NaN	NaN	NaN	11	NaN	NaN	NaN	11	11
261	'>gi|59850762|ref|NP_060473.2| uveal autoantigen with coiled-coil domains and ankyrin repeats isoform 1 [Homo sapiens]'	NaN	NaN	11	NaN	NaN	NaN	NaN	NaN	11	11
262	'>gi|63162572|ref|NP_005989.3| T-complex protein 1 subunit gamma isoform a [Homo sapiens]'	NaN	NaN	NaN	NaN	11	NaN	NaN	NaN	11	11
263	'>gi|94721239|ref|NP_038203.2| isoleucine--tRNA ligase, cytoplasmic [Homo sapiens]'	NaN	NaN	11	NaN	NaN	NaN	NaN	NaN	11	11
264	'>gi|150456463|ref|NP_835465.2| gasdermin-A [Homo sapiens]'	9	1	1	4	6	10	8	8	10	47
265	'>gi|39995109|ref|NP_000396.2| ganglioside GM2 activator isoform 1 precursor [Homo sapiens]'	1	3	NaN	5	4	7	10	5	10	35
266	'>gi|4505821|ref|NP_002643.1| prolactin-inducible protein precursor [Homo sapiens]'	6	10	6	6	NaN	NaN	3	2	10	33
267	'>gi|112380628|ref|NP_005552.3| lysosome-associated membrane glycoprotein 1 precursor [Homo sapiens]'	2	NaN	5	10	6	3	3	NaN	10	29
268	'>Reverse >gi|19923985|ref|NP_612462.1| ras-related protein Rab-3C [Homo sapiens]'	NaN	5	NaN	NaN	NaN	NaN	6	10	10	21
269	'>Reverse >gi|4759000|ref|NP_004274.1| ras-related protein Rab-3D [Homo sapiens]'	NaN	5	NaN	NaN	NaN	NaN	6	10	10	21
270	'>gi|4502053|ref|NP_001130.1| arachidonate 12-lipoxygenase, 12R-type [Homo sapiens]'	NaN	NaN	NaN	2	10	5	2	1	10	20
271	'>gi|33946329|ref|NP_005393.2| ras-related protein Ral-A precursor [Homo sapiens]'	NaN	NaN	NaN	NaN	NaN	10	8	NaN	10	18
272	'>gi|98986464|ref|NP_006818.3| transmembrane emp24 domain-containing protein 10 precursor [Homo sapiens]'	NaN	NaN	NaN	NaN	NaN	4	10	3	10	17
273	'>gi|4557014|ref|NP_001743.1| catalase [Homo sapiens]'	10	NaN	NaN	1	2	2	1	NaN	10	16
274	'>gi|44890059|ref|NP_005538.2| involucrin [Homo sapiens]'	NaN	NaN	NaN	10	5	NaN	NaN	NaN	10	15
275	'>gi|4504747|ref|NP_002195.1| integrin alpha-3 isoform a precursor [Homo sapiens]'	NaN	NaN	NaN	4	1	10	NaN	NaN	10	15
276	'>gi|48255941|ref|NP_001001391.1| CD44 antigen isoform 4 precursor [Homo sapiens]'	NaN	NaN	NaN	10	3	NaN	2	NaN	10	15
277	'>gi|5032315|ref|NP_004001.1| dystrophin Dp427p2 isoform [Homo sapiens]'	NaN	NaN	NaN	NaN	4	NaN	10	NaN	10	14
278	'>gi|153791670|ref|NP_056932.2| keratin, type II cytoskeletal 2 oral [Homo sapiens]'	10	1	NaN	NaN	NaN	NaN	NaN	NaN	10	11
279	'>gi|10880989|ref|NP_067075.1| ras-related protein Rab-18 isoform 1 [Homo sapiens]'	NaN	NaN	NaN	NaN	NaN	NaN	10	NaN	10	10
280	'>gi|13259508|ref|NP_075408.1| dynactin subunit 1 isoform 2 [Homo sapiens]'	NaN	NaN	10	NaN	NaN	NaN	NaN	NaN	10	10
281	'>gi|332800981|ref|NP_001193880.1| monocarboxylate transporter 4 [Homo sapiens]'	NaN	NaN	NaN	NaN	NaN	10	NaN	NaN	10	10
282	'>gi|5031873|ref|NP_005561.1| protein ERGIC-53 precursor [Homo sapiens]'	NaN	NaN	NaN	NaN	10	NaN	NaN	NaN	10	10
283	'>gi|531990816|ref|NP_001269091.1| F-actin-capping protein subunit beta isoform 4 [Homo sapiens]'	NaN	NaN	NaN	NaN	NaN	10	NaN	NaN	10	10
284	'>gi|5803149|ref|NP_006806.1| transmembrane emp24 domain-containing protein 2 precursor [Homo sapiens]'	NaN	NaN	NaN	NaN	NaN	NaN	10	NaN	10	10
285	'>gi|54607141|ref|NP_060626.2| vacuolar protein sorting-associated protein 13D isoform 2 [Homo sapiens]'	6	6	9	6	6	6	9	9	9	57
286	'>gi|528524479|ref|NP_001268649.1| polyubiquitin-B precursor [Homo sapiens]'	3	3	NaN	7	7	8	9	7	9	44
287	'>gi|67782356|ref|NP_001255.3| corneodesmosin precursor [Homo sapiens]'	9	3	6	5	9	4	3	3	9	42
288	'>gi|311893365|ref|NP_001185798.1| calpain-1 catalytic subunit [Homo sapiens]'	7	NaN	NaN	9	8	NaN	3	NaN	9	27
289	'>gi|150036268|ref|NP_004002.2| dystrophin Dp260-1 isoform [Homo sapiens]'	NaN	2	6	NaN	NaN	9	NaN	NaN	9	17
290	'>gi|24430190|ref|NP_002266.2| keratin, type I cytoskeletal 15 [Homo sapiens]'	9	NaN	1	7	NaN	NaN	NaN	NaN	9	17
291	'>gi|39725636|ref|NP_059980.2| transmembrane emp24 domain-containing protein 9 precursor [Homo sapiens]'	NaN	NaN	NaN	NaN	NaN	8	9	NaN	9	17
292	'>gi|4504183|ref|NP_000843.1| glutathione S-transferase P [Homo sapiens]'	NaN	NaN	NaN	9	2	NaN	3	3	9	17
293	'>gi|110611903|ref|NP_060003.2| myosin-4 [Homo sapiens]'	NaN	9	4	NaN	NaN	NaN	NaN	NaN	9	13
294	'>gi|28173564|ref|NP_778238.1| keratin, type II cytoskeletal 73 [Homo sapiens]'	NaN	9	NaN	NaN	NaN	NaN	4	NaN	9	13
295	'>gi|67782365|ref|NP_005547.3| keratin, type II cytoskeletal 7 [Homo sapiens]'	9	2	NaN	NaN	1	NaN	NaN	NaN	9	12
296	'>gi|38372925|ref|NP_940991.1| basigin isoform 2 [Homo sapiens]'	NaN	NaN	NaN	NaN	9	2	NaN	NaN	9	11
297	'>gi|52630342|ref|NP_002108.4| HLA class I histocompatibility antigen, Cw-1 alpha chain precursor [Homo sapiens]'	NaN	NaN	NaN	NaN	9	2	NaN	NaN	9	11
298	'>gi|16933567|ref|NP_005361.2| ras-related protein Rab-8A [Homo sapiens]'	NaN	NaN	NaN	NaN	NaN	1	9	NaN	9	10
299	'''>Reverse >gi|111154101|ref|NP_689738.3| amyotrophic lateral sclerosis 2 chromosomal region candidate gene 11 protein isoform 2 [...'' <Preview truncated at 128 characters>'	9	NaN	NaN	NaN	NaN	NaN	NaN	NaN	9	9
300	'>Reverse >gi|68303549|ref|NP_001020117.1| argininosuccinate lyase isoform 3 [Homo sapiens]'	NaN	NaN	NaN	NaN	NaN	NaN	NaN	9	9	9
301	'>gi|11496885|ref|NP_005442.2| PDZ and LIM domain protein 7 isoform 1 [Homo sapiens]'	NaN	NaN	NaN	NaN	9	NaN	NaN	NaN	9	9
302	'>gi|14589866|ref|NP_004309.2| aspartyl/asparaginyl beta-hydroxylase isoform a [Homo sapiens]'	NaN	NaN	NaN	9	NaN	NaN	NaN	NaN	9	9
303	'>gi|156564401|ref|NP_006169.2| vesicle-fusing ATPase [Homo sapiens]'	NaN	NaN	NaN	NaN	9	NaN	NaN	NaN	9	9
304	'>gi|20631958|ref|NP_620116.1| apoptosis regulator BAX isoform alpha [Homo sapiens]'	NaN	NaN	NaN	NaN	NaN	NaN	9	NaN	9	9
305	'>gi|212549756|ref|NP_742127.1| calcium/calmodulin-dependent protein kinase type II subunit delta isoform 4 [Homo sapiens]'	NaN	NaN	NaN	NaN	9	NaN	NaN	NaN	9	9
306	'>gi|22902130|ref|NP_690621.1| inactive tyrosine-protein kinase 7 isoform d precursor [Homo sapiens]'	NaN	NaN	9	NaN	NaN	NaN	NaN	NaN	9	9
307	'>gi|256222019|ref|NP_057215.3| ras-related protein Rab-10 [Homo sapiens]'	NaN	NaN	NaN	NaN	NaN	NaN	9	NaN	9	9
308	'>gi|32967311|ref|NP_004422.2| ephrin type-A receptor 2 precursor [Homo sapiens]'	NaN	NaN	NaN	9	NaN	NaN	NaN	NaN	9	9
309	'>gi|4502565|ref|NP_001740.1| calpain small subunit 1 [Homo sapiens]'	NaN	NaN	NaN	NaN	NaN	NaN	9	NaN	9	9
310	'>gi|4505531|ref|NP_002547.1| oxysterol-binding protein 1 [Homo sapiens]'	NaN	NaN	NaN	9	NaN	NaN	NaN	NaN	9	9
311	'>gi|57863257|ref|NP_110379.2| T-complex protein 1 subunit alpha isoform a [Homo sapiens]'	NaN	NaN	NaN	NaN	9	NaN	NaN	NaN	9	9
312	'>gi|5901912|ref|NP_008819.1| calmodulin [Homo sapiens]'	NaN	NaN	NaN	9	NaN	NaN	NaN	NaN	9	9
313	'>gi|61742777|ref|NP_005566.2| leucyl-cystinyl aminopeptidase isoform 1 [Homo sapiens]'	NaN	NaN	9	NaN	NaN	NaN	NaN	NaN	9	9
314	'>gi|61744483|ref|NP_001013269.1| 4F2 cell-surface antigen heavy chain isoform f [Homo sapiens]'	NaN	NaN	NaN	NaN	9	NaN	NaN	NaN	9	9
315	'>gi|94721252|ref|NP_919415.2| vesicle-associated membrane protein-associated protein A isoform 2 [Homo sapiens]'	NaN	NaN	NaN	NaN	NaN	9	NaN	NaN	9	9
316	'>gi|148539848|ref|NP_077741.2| desmocollin-3 isoform Dsc3b preproprotein [Homo sapiens]'	8	4	5	4	5	1	NaN	NaN	8	27
317	'>Reverse >gi|635172830|ref|NP_001278917.1| carboxypeptidase N subunit 2 precursor [Homo sapiens]'	5	5	NaN	2	8	NaN	NaN	6	8	26
318	'>gi|4502101|ref|NP_000691.1| annexin A1 [Homo sapiens]'	NaN	NaN	NaN	7	4	8	NaN	NaN	8	19
319	'>gi|213688375|ref|NP_001135417.1| actin, aortic smooth muscle [Homo sapiens]'	2	NaN	NaN	NaN	6	8	NaN	NaN	8	16
320	'>gi|4885281|ref|NP_005262.1| glutamate dehydrogenase 1, mitochondrial precursor [Homo sapiens]'	7	8	NaN	NaN	NaN	1	NaN	NaN	8	16
321	'>gi|5453704|ref|NP_006398.1| PRA1 family protein 3 [Homo sapiens]'	NaN	NaN	NaN	NaN	NaN	4	3	8	8	15
322	'>gi|4507357|ref|NP_003555.1| transgelin-2 isoform b [Homo sapiens]'	NaN	NaN	NaN	8	NaN	NaN	6	NaN	8	14
323	'>gi|4759302|ref|NP_004729.1| vesicle-associated membrane protein-associated protein B/C isoform 1 [Homo sapiens]'	NaN	NaN	NaN	NaN	NaN	8	6	NaN	8	14
324	'>Reverse >gi|4504143|ref|NP_000833.1| metabotropic glutamate receptor 5 isoform b precursor [Homo sapiens]'	NaN	NaN	NaN	NaN	4	NaN	NaN	8	8	12
325	'>gi|222418613|ref|NP_001138468.1| integrin alpha-7 isoform 1 precursor [Homo sapiens]'	NaN	NaN	8	NaN	3	NaN	NaN	NaN	8	11
326	'>gi|333470719|ref|NP_001193997.1| basic leucine zipper and W2 domain-containing protein 1 isoform 2 [Homo sapiens]'	NaN	NaN	NaN	NaN	8	3	NaN	NaN	8	11
327	'>gi|4507705|ref|NP_003302.1| pleckstrin homology-like domain family A member 2 [Homo sapiens]'	NaN	NaN	NaN	NaN	NaN	3	8	NaN	8	11
328	'>gi|149999606|ref|NP_006293.2| mannosyl-oligosaccharide glucosidase isoform 1 [Homo sapiens]'	NaN	NaN	NaN	8	2	NaN	NaN	NaN	8	10
329	'>gi|112382250|ref|NP_003119.2| spectrin beta chain, non-erythrocytic 1 isoform 1 [Homo sapiens]'	NaN	8	NaN	NaN	NaN	NaN	NaN	NaN	8	8
330	'>gi|13376617|ref|NP_079348.1| prostaglandin E synthase 2 isoform 1 [Homo sapiens]'	NaN	NaN	NaN	NaN	NaN	8	NaN	NaN	8	8
331	'>gi|14141161|ref|NP_004492.2| heterogeneous nuclear ribonucleoprotein U isoform b [Homo sapiens]'	NaN	NaN	NaN	8	NaN	NaN	NaN	NaN	8	8
332	'>gi|145309311|ref|NP_001034680.2| probable ubiquitin carboxyl-terminal hydrolase FAF-X isoform 4 [Homo sapiens]'	NaN	8	NaN	NaN	NaN	NaN	NaN	NaN	8	8
333	'>gi|190194386|ref|NP_064508.3| transmembrane 9 superfamily member 3 precursor [Homo sapiens]'	NaN	NaN	NaN	NaN	8	NaN	NaN	NaN	8	8
334	'>gi|197276600|ref|NP_001127836.1| microtubule-associated protein 4 isoform 4 [Homo sapiens]'	NaN	NaN	8	NaN	NaN	NaN	NaN	NaN	8	8
335	'>gi|21361657|ref|NP_005304.3| protein disulfide-isomerase A3 precursor [Homo sapiens]'	NaN	NaN	NaN	8	NaN	NaN	NaN	NaN	8	8
336	'>gi|28933465|ref|NP_803173.1| syntaxin-12 [Homo sapiens]'	NaN	NaN	NaN	NaN	NaN	8	NaN	NaN	8	8
337	'>gi|344925830|ref|NP_001230708.1| redox-regulatory protein FAM213A isoform 1 precursor [Homo sapiens]'	NaN	NaN	NaN	NaN	NaN	NaN	8	NaN	8	8
338	'>gi|48762932|ref|NP_006576.2| T-complex protein 1 subunit theta isoform 1 [Homo sapiens]'	NaN	NaN	NaN	NaN	8	NaN	NaN	NaN	8	8
339	'>gi|4885063|ref|NP_005156.1| fructose-bisphosphate aldolase C [Homo sapiens]'	NaN	NaN	NaN	8	NaN	NaN	NaN	NaN	8	8
340	'>gi|5729770|ref|NP_000382.3| tripeptidyl-peptidase 1 preproprotein [Homo sapiens]'	NaN	NaN	NaN	NaN	8	NaN	NaN	NaN	8	8
341	'>gi|7019485|ref|NP_037364.1| programmed cell death protein 6 isoform 1 [Homo sapiens]'	NaN	NaN	NaN	NaN	NaN	NaN	8	NaN	8	8
342	'>gi|4503113|ref|NP_001314.1| cystatin-M precursor [Homo sapiens]'	5	3	NaN	7	5	3	6	5	7	34
343	'>gi|4506145|ref|NP_002760.1| trypsin-1 preproprotein [Homo sapiens]'	5	5	4	7	4	2	4	NaN	7	31
344	'>Reverse >gi|119395750|ref|NP_006112.3| keratin, type II cytoskeletal 1 [Homo sapiens]'	7	4	2	3	NaN	6	NaN	NaN	7	22
345	'>gi|22507405|ref|NP_683695.1| short-chain dehydrogenase/reductase family 9C member 7 [Homo sapiens]'	NaN	NaN	NaN	NaN	3	6	7	3	7	19
346	'>sp|CAS1_BOVIN|(Common contaminant protein)'	NaN	3	1	NaN	2	7	5	1	7	19
347	'>Reverse >gi|13491166|ref|NP_055491.1| pumilio homolog 1 isoform 2 [Homo sapiens]'	7	7	NaN	NaN	NaN	NaN	NaN	NaN	7	14
348	'>gi|635574573|ref|NP_001278977.1| ras-related protein Rab-5A isoform 2 [Homo sapiens]'	NaN	NaN	NaN	NaN	NaN	7	7	NaN	7	14
349	'>gi|17921989|ref|NP_005991.1| tubulin alpha-4A chain isoform 1 [Homo sapiens]'	NaN	NaN	NaN	2	7	3	NaN	1	7	13
350	'>gi|302565871|ref|NP_065944.2| coiled-coil domain-containing protein 180 [Homo sapiens]'	NaN	NaN	7	NaN	6	NaN	NaN	NaN	7	13
351	'>gi|386869503|ref|NP_001247435.1| 40S ribosomal protein S3 isoform 2 [Homo sapiens]'	NaN	NaN	NaN	NaN	NaN	3	3	7	7	13
352	'>gi|4503481|ref|NP_001395.1| elongation factor 1-gamma [Homo sapiens]'	2	NaN	NaN	4	7	NaN	NaN	NaN	7	13
353	'>gi|4826898|ref|NP_005013.1| profilin-1 [Homo sapiens]'	NaN	NaN	NaN	7	NaN	NaN	1	5	7	13
354	'>gi|224831241|ref|NP_001139281.1| myosin-14 isoform 3 [Homo sapiens]'	NaN	2	3	7	NaN	NaN	NaN	NaN	7	12
355	'>gi|354983495|ref|NP_001238979.1| protein-L-isoaspartate(D-aspartate) O-methyltransferase isoform 3 [Homo sapiens]'	NaN	NaN	NaN	NaN	7	NaN	NaN	4	7	11
356	'>gi|4502317|ref|NP_001687.1| V-type proton ATPase subunit E 1 isoform a [Homo sapiens]'	NaN	NaN	NaN	3	NaN	7	1	NaN	7	11
357	'>gi|109255251|ref|NP_000418.2| loricrin [Homo sapiens]'	3	NaN	NaN	NaN	7	NaN	NaN	NaN	7	10
358	'>gi|23308577|ref|NP_006614.2| D-3-phosphoglycerate dehydrogenase [Homo sapiens]'	NaN	NaN	NaN	3	7	NaN	NaN	NaN	7	10
359	'>gi|4758018|ref|NP_004359.1| calponin-2 isoform a [Homo sapiens]'	NaN	NaN	NaN	NaN	NaN	3	7	NaN	7	10
360	'>gi|345198270|ref|NP_001230824.1| tumor protein D54 isoform j [Homo sapiens]'	NaN	NaN	NaN	NaN	2	NaN	7	NaN	7	9
361	'>gi|50592996|ref|NP_006077.2| tubulin beta-3 chain isoform 1 [Homo sapiens]'	NaN	NaN	NaN	NaN	7	2	NaN	NaN	7	9
362	'''>gi|578804821|ref|XP_006712781.1| PREDICTED: signal transducer and activator of transcription 1-alpha/beta isoform X1 [Homo sapi...'' <Preview truncated at 128 characters>'	7	2	NaN	NaN	NaN	NaN	NaN	NaN	7	9
363	'>gi|11321585|ref|NP_002065.1| guanine nucleotide-binding protein G(I)/G(S)/G(T) subunit beta-1 isoform 1 [Homo sapiens]'	NaN	NaN	NaN	NaN	NaN	7	NaN	NaN	7	7
364	'>gi|117168248|ref|NP_057479.2| very-long-chain (3R)-3-hydroxyacyl-CoA dehydratase 3 [Homo sapiens]'	NaN	NaN	NaN	NaN	NaN	7	NaN	NaN	7	7
365	'>gi|119964726|ref|NP_000867.2| cation-independent mannose-6-phosphate receptor precursor [Homo sapiens]'	NaN	7	NaN	NaN	NaN	NaN	NaN	NaN	7	7
366	'>gi|153792663|ref|NP_060004.3| myosin-2 [Homo sapiens]'	NaN	7	NaN	NaN	NaN	NaN	NaN	NaN	7	7
367	'>gi|170932494|ref|NP_003560.2| syntaxin-7 [Homo sapiens]'	NaN	NaN	NaN	NaN	NaN	7	NaN	NaN	7	7
368	'>gi|192807292|ref|NP_061889.2| keratin, type I cytoskeletal 24 [Homo sapiens]'	7	NaN	NaN	NaN	NaN	NaN	NaN	NaN	7	7
369	'>gi|223468630|ref|NP_001138551.1| conserved oligomeric Golgi complex subunit 6 isoform 2 [Homo sapiens]'	NaN	NaN	NaN	NaN	7	NaN	NaN	NaN	7	7
370	'>gi|315138990|ref|NP_001186704.1| carboxypeptidase D isoform 2 [Homo sapiens]'	NaN	NaN	7	NaN	NaN	NaN	NaN	NaN	7	7
371	'>gi|327315343|ref|NP_001192157.1| sortilin isoform 2 [Homo sapiens]'	NaN	NaN	NaN	7	NaN	NaN	NaN	NaN	7	7
372	'>gi|343168770|ref|NP_001230209.1| CD166 antigen isoform 2 precursor [Homo sapiens]'	NaN	NaN	NaN	7	NaN	NaN	NaN	NaN	7	7
373	'>gi|373938448|ref|NP_001243328.1| elongation of very long chain fatty acids protein 1 isoform 1 [Homo sapiens]'	NaN	NaN	NaN	NaN	NaN	NaN	7	NaN	7	7
374	'>gi|38455427|ref|NP_006421.2| T-complex protein 1 subunit delta isoform a [Homo sapiens]'	NaN	NaN	NaN	NaN	7	NaN	NaN	NaN	7	7
375	'>gi|40317626|ref|NP_003237.2| thrombospondin-1 precursor [Homo sapiens]'	NaN	NaN	7	NaN	NaN	NaN	NaN	NaN	7	7
376	'>gi|44680105|ref|NP_149129.2| caldesmon isoform 1 [Homo sapiens]'	NaN	NaN	NaN	NaN	7	NaN	NaN	NaN	7	7
377	'>gi|4503253|ref|NP_001335.1| dolichyl-diphosphooligosaccharide--protein glycosyltransferase subunit DAD1 [Homo sapiens]'	NaN	NaN	NaN	NaN	NaN	NaN	NaN	7	7	7
378	'>gi|4506671|ref|NP_000995.1| 60S acidic ribosomal protein P2 [Homo sapiens]'	NaN	NaN	NaN	7	NaN	NaN	NaN	NaN	7	7
379	'>gi|4557617|ref|NP_000811.1| growth arrest-specific protein 6 precursor [Homo sapiens]'	NaN	NaN	NaN	NaN	7	NaN	NaN	NaN	7	7
380	'>gi|4758412|ref|NP_004472.1| polypeptide N-acetylgalactosaminyltransferase 2 precursor [Homo sapiens]'	NaN	NaN	NaN	NaN	7	NaN	NaN	NaN	7	7
381	'''>gi|511630715|ref|NP_001265432.1| dolichyl-diphosphooligosaccharide--protein glycosyltransferase subunit STT3A isoform a [Homo s...'' <Preview truncated at 128 characters>'	NaN	NaN	NaN	NaN	7	NaN	NaN	NaN	7	7
382	'>gi|523425734|ref|NP_001265637.1| 26S proteasome non-ATPase regulatory subunit 2 isoform 2 [Homo sapiens]'	NaN	NaN	NaN	7	NaN	NaN	NaN	NaN	7	7
383	'>gi|5803023|ref|NP_006807.1| vesicular integral-membrane protein VIP36 precursor [Homo sapiens]'	NaN	NaN	NaN	NaN	NaN	7	NaN	NaN	7	7
384	'>gi|6466450|ref|NP_009294.1| catechol O-methyltransferase isoform S-COMT [Homo sapiens]'	NaN	NaN	NaN	NaN	NaN	NaN	7	NaN	7	7
385	'>gi|656985039|ref|NP_001280624.1| septin-9 isoform g [Homo sapiens]'	NaN	NaN	NaN	NaN	7	NaN	NaN	NaN	7	7
386	'>gi|7661948|ref|NP_055545.1| malectin precursor [Homo sapiens]'	NaN	NaN	NaN	NaN	NaN	7	NaN	NaN	7	7
387	'>gi|349732256|ref|NP_001231867.1| thioredoxin isoform 2 [Homo sapiens]'	4	1	1	5	2	3	5	6	6	27
388	'>gi|17998551|ref|NP_536722.1| serpin B12 [Homo sapiens]'	4	3	5	NaN	6	3	5	NaN	6	26
389	'>gi|4885165|ref|NP_005204.1| cystatin-A [Homo sapiens]'	3	2	NaN	4	2	3	3	6	6	23
390	'>gi|4506189|ref|NP_002783.1| proteasome subunit alpha type-7 [Homo sapiens]'	5	NaN	NaN	6	1	5	3	1	6	21
391	'>gi|4557894|ref|NP_000230.1| lysozyme C precursor [Homo sapiens]'	2	4	1	3	NaN	1	6	4	6	21
392	'>gi|4557367|ref|NP_000377.1| bleomycin hydrolase [Homo sapiens]'	4	2	1	5	6	2	NaN	NaN	6	20
393	'>gi|17158005|ref|NP_477521.1| mucin-like protein 1 precursor [Homo sapiens]'	1	4	NaN	4	NaN	NaN	6	4	6	19
394	'>Reverse >gi|658310017|ref|NP_001280744.1| aldehyde dehydrogenase family 1 member A3 isoform 2 [Homo sapiens]'	6	NaN	NaN	NaN	4	3	4	NaN	6	17
395	'>gi|169646441|ref|NP_001108628.1| rab GDP dissociation inhibitor beta isoform 2 [Homo sapiens]'	4	NaN	NaN	3	6	NaN	3	NaN	6	16
396	'>gi|17986258|ref|NP_066299.2| myosin light polypeptide 6 isoform 1 [Homo sapiens]'	NaN	NaN	NaN	4	NaN	NaN	5	6	6	15
397	'>gi|47825361|ref|NP_001001414.1| F-box only protein 50 [Homo sapiens]'	NaN	NaN	NaN	NaN	NaN	6	5	3	6	14
398	'>gi|331999954|ref|NP_002263.3| keratin, type II cytoskeletal 4 [Homo sapiens]'	6	5	NaN	NaN	NaN	NaN	2	NaN	6	13
399	'>gi|88501738|ref|NP_001034230.1| TRIO and F-actin-binding protein isoform 6 [Homo sapiens]'	NaN	NaN	6	NaN	NaN	4	3	NaN	6	13
400	'>gi|38455402|ref|NP_005555.2| neutrophil gelatinase-associated lipocalin precursor [Homo sapiens]'	NaN	NaN	NaN	NaN	NaN	5	6	NaN	6	11
401	'>gi|7705855|ref|NP_057226.1| estradiol 17-beta-dehydrogenase 12 [Homo sapiens]'	NaN	NaN	NaN	NaN	NaN	5	6	NaN	6	11
402	'>gi|9845502|ref|NP_002286.2| 40S ribosomal protein SA [Homo sapiens]'	NaN	NaN	NaN	6	1	3	NaN	1	6	11
403	'>gi|33457308|ref|NP_872353.2| transmembrane emp24 domain-containing protein 4 precursor [Homo sapiens]'	NaN	NaN	NaN	NaN	NaN	4	6	NaN	6	10
404	'>gi|374671789|ref|NP_001243442.1| single-stranded DNA-binding protein, mitochondrial precursor [Homo sapiens]'	NaN	NaN	NaN	NaN	NaN	NaN	4	6	6	10
405	'>gi|7661744|ref|NP_054757.1| basic leucine zipper and W2 domain-containing protein 2 [Homo sapiens]'	6	NaN	NaN	NaN	4	NaN	NaN	NaN	6	10
406	'>gi|325301078|ref|NP_001191456.1| translocon-associated protein subunit delta isoform 3 precursor [Homo sapiens]'	NaN	NaN	NaN	NaN	NaN	1	6	2	6	9
407	'>gi|357933617|ref|NP_001239546.1| lipocalin-1 isoform 1 precursor [Homo sapiens]'	6	NaN	NaN	3	NaN	NaN	NaN	NaN	6	9
408	'>gi|7019415|ref|NP_037468.1| protein transport protein Sec61 subunit alpha isoform 1 [Homo sapiens]'	NaN	NaN	NaN	NaN	NaN	6	3	NaN	6	9
409	'>gi|205277463|ref|NP_001128527.1| transketolase isoform 1 [Homo sapiens]'	NaN	NaN	NaN	2	6	NaN	NaN	NaN	6	8
410	'>gi|153791158|ref|NP_004684.2| keratin, type II cytoskeletal 75 [Homo sapiens]'	6	NaN	NaN	NaN	NaN	1	NaN	NaN	6	7
411	'>gi|83582815|ref|NP_003116.2| cornifin-B [Homo sapiens]'	1	NaN	NaN	NaN	6	NaN	NaN	NaN	6	7
412	'''>Reverse >gi|270133205|ref|NP_001161688.1| amyotrophic lateral sclerosis 2 chromosomal region candidate gene 11 protein isoform ...'' <Preview truncated at 128 characters>'	NaN	6	NaN	NaN	NaN	NaN	NaN	NaN	6	6
413	'>Reverse >gi|313747580|ref|NP_001186306.1| long-chain-fatty-acid--CoA ligase ACSBG1 isoform 2 [Homo sapiens]'	NaN	NaN	6	NaN	NaN	NaN	NaN	NaN	6	6
414	'>Reverse >gi|71565152|ref|NP_000661.2| alcohol dehydrogenase 4 [Homo sapiens]'	6	NaN	NaN	NaN	NaN	NaN	NaN	NaN	6	6
415	'>gi|122937321|ref|NP_001073930.1| homeobox protein unc-4 homolog [Homo sapiens]'	NaN	NaN	NaN	NaN	6	NaN	NaN	NaN	6	6
416	'>gi|13236587|ref|NP_077310.1| transmembrane protein 43 [Homo sapiens]'	NaN	NaN	NaN	NaN	NaN	6	NaN	NaN	6	6
417	'>gi|148225659|ref|NP_055851.1| endonuclease domain-containing 1 protein precursor [Homo sapiens]'	NaN	NaN	NaN	NaN	6	NaN	NaN	NaN	6	6
418	'>gi|21361416|ref|NP_036382.2| ras-related protein R-Ras2 isoform a [Homo sapiens]'	NaN	NaN	NaN	NaN	NaN	NaN	6	NaN	6	6
419	'>gi|222136583|ref|NP_001558.3| phosphatidylinositol 3,4,5-trisphosphate 5-phosphatase 2 [Homo sapiens]'	NaN	NaN	6	NaN	NaN	NaN	NaN	NaN	6	6
420	'>gi|255958282|ref|NP_005808.3| perilipin-3 isoform 1 [Homo sapiens]'	NaN	NaN	NaN	NaN	6	NaN	NaN	NaN	6	6
421	'>gi|258613875|ref|NP_056308.3| KN motif and ankyrin repeat domain-containing protein 2 isoform 1 [Homo sapiens]'	NaN	NaN	NaN	6	NaN	NaN	NaN	NaN	6	6
422	'>gi|29171705|ref|NP_803182.1| melanoma-associated antigen D2 [Homo sapiens]'	NaN	NaN	NaN	NaN	6	NaN	NaN	NaN	6	6
423	'>gi|40254924|ref|NP_060979.2| leucine-rich repeat-containing protein 59 [Homo sapiens]'	NaN	NaN	NaN	NaN	NaN	6	NaN	NaN	6	6
424	'>gi|4503513|ref|NP_003748.1| eukaryotic translation initiation factor 3 subunit I [Homo sapiens]'	NaN	NaN	NaN	NaN	NaN	6	NaN	NaN	6	6
425	'>gi|4506725|ref|NP_000998.1| 40S ribosomal protein S4, X isoform X isoform [Homo sapiens]'	NaN	NaN	NaN	NaN	6	NaN	NaN	NaN	6	6
426	'>gi|4557553|ref|NP_000108.1| emerin [Homo sapiens]'	NaN	NaN	NaN	NaN	NaN	6	NaN	NaN	6	6
427	'>gi|4758984|ref|NP_004654.1| ras-related protein Rab-11A isoform 1 [Homo sapiens]'	NaN	NaN	NaN	6	NaN	NaN	NaN	NaN	6	6
428	'>gi|4759300|ref|NP_004772.1| vesicle-associated membrane protein 3 [Homo sapiens]'	NaN	NaN	NaN	NaN	NaN	NaN	NaN	6	6	6
429	'>gi|499589572|ref|NP_001265121.1| neutral alpha-glucosidase AB isoform 4 [Homo sapiens]'	NaN	NaN	NaN	6	NaN	NaN	NaN	NaN	6	6
430	'>gi|52485853|ref|NP_001004439.1| integrin alpha-11 precursor [Homo sapiens]'	NaN	NaN	6	NaN	NaN	NaN	NaN	NaN	6	6
431	'>gi|528281411|ref|NP_001268441.1| trifunctional enzyme subunit beta, mitochondrial isoform 2 precursor [Homo sapiens]'	NaN	NaN	NaN	NaN	6	NaN	NaN	NaN	6	6
432	'>gi|530417131|ref|XP_005259256.1| PREDICTED: vasodilator-stimulated phosphoprotein isoform X1 [Homo sapiens]'	NaN	NaN	NaN	NaN	6	NaN	NaN	NaN	6	6
433	'>gi|530425322|ref|XP_005259653.1| PREDICTED: nicalin isoform X1 [Homo sapiens]'	NaN	NaN	NaN	NaN	6	NaN	NaN	NaN	6	6
434	'>gi|557878740|ref|NP_001273640.1| long-chain-fatty-acid--CoA ligase 1 isoform c [Homo sapiens]'	NaN	NaN	NaN	NaN	6	NaN	NaN	NaN	6	6
435	'>gi|56605994|ref|NP_001008389.1| CDGSH iron-sulfur domain-containing protein 2 [Homo sapiens]'	NaN	NaN	NaN	NaN	NaN	NaN	NaN	6	6	6
436	'>gi|578818362|ref|XP_006717489.1| PREDICTED: ankyrin repeat domain-containing protein 26 isoform X4 [Homo sapiens]'	6	NaN	NaN	NaN	NaN	NaN	NaN	NaN	6	6
437	'>gi|578831862|ref|XP_006722318.1| PREDICTED: puromycin-sensitive aminopeptidase-like protein-like isoform X1 [Homo sapiens]'	6	NaN	NaN	NaN	NaN	NaN	NaN	NaN	6	6
438	'>gi|663429602|ref|NP_001287674.1| protein transport protein Sec31A isoform 7 [Homo sapiens]'	NaN	NaN	6	NaN	NaN	NaN	NaN	NaN	6	6
439	'>gi|82659109|ref|NP_065816.2| E3 ubiquitin-protein ligase UBR4 [Homo sapiens]'	6	NaN	NaN	NaN	NaN	NaN	NaN	NaN	6	6
440	'>sp|K1M2_SHEEP|(Common contaminant protein)'	6	NaN	NaN	NaN	NaN	NaN	NaN	NaN	6	6
441	'>gi|156713442|ref|NP_001096137.1| proteasome subunit alpha type-4 isoform 1 [Homo sapiens]'	NaN	NaN	NaN	2	4	2	5	NaN	5	13
442	'>sp|K1C15_SHEEP|(Common contaminant protein)'	3	NaN	3	5	NaN	NaN	NaN	NaN	5	11
443	'>gi|117938318|ref|NP_001071089.1| vacuolar protein sorting-associated protein 37D [Homo sapiens]'	NaN	5	NaN	NaN	NaN	NaN	NaN	5	5	10
444	'>gi|13569962|ref|NP_112243.1| ras-related protein Rab-1B [Homo sapiens]'	NaN	NaN	NaN	5	NaN	NaN	5	NaN	5	10
445	'>gi|42822874|ref|NP_976319.1| ribonuclease inhibitor [Homo sapiens]'	NaN	NaN	5	NaN	3	2	NaN	NaN	5	10
446	'>gi|5031631|ref|NP_005497.1| lysosome membrane protein 2 isoform 1 precursor [Homo sapiens]'	NaN	NaN	1	4	5	NaN	NaN	NaN	5	10
447	'>gi|5174447|ref|NP_006089.1| guanine nucleotide-binding protein subunit beta-2-like 1 [Homo sapiens]'	NaN	NaN	NaN	NaN	5	4	1	NaN	5	10
448	'>gi|61743916|ref|NP_057436.2| carboxypeptidase A4 preproprotein [Homo sapiens]'	5	NaN	NaN	3	2	NaN	NaN	NaN	5	10
449	'>Reverse >gi|4506181|ref|NP_002778.1| proteasome subunit alpha type-2 [Homo sapiens]'	NaN	NaN	NaN	NaN	NaN	4	5	NaN	5	9
450	'>gi|41393545|ref|NP_004574.2| ras-related protein Rab-5C isoform a [Homo sapiens]'	NaN	NaN	NaN	NaN	NaN	4	5	NaN	5	9
451	'>gi|530414369|ref|XP_005266835.1| PREDICTED: serpin B12 isoform X1 [Homo sapiens]'	NaN	NaN	NaN	4	NaN	NaN	NaN	5	5	9
452	'>gi|87159824|ref|NP_001034579.1| CD151 antigen [Homo sapiens]'	NaN	NaN	NaN	NaN	NaN	4	5	NaN	5	9
453	'>gi|157649073|ref|NP_001099000.1| adenylyl cyclase-associated protein 1 [Homo sapiens]'	NaN	NaN	NaN	3	5	NaN	NaN	NaN	5	8
454	'>gi|63079709|ref|NP_443200.2| apolipoprotein A-V precursor [Homo sapiens]'	NaN	NaN	3	NaN	5	NaN	NaN	NaN	5	8
455	'>gi|115430112|ref|NP_005660.4| receptor expression-enhancing protein 5 [Homo sapiens]'	NaN	NaN	NaN	NaN	NaN	NaN	5	2	5	7
456	'>gi|115496169|ref|NP_000248.2| myosin-7 [Homo sapiens]'	1	5	1	NaN	NaN	NaN	NaN	NaN	5	7
457	'>gi|148529014|ref|NP_001914.3| DNA damage-binding protein 1 [Homo sapiens]'	NaN	NaN	2	5	NaN	NaN	NaN	NaN	5	7
458	'>gi|256985102|ref|NP_001157941.1| TRAM adaptor with GOLD domain isoform 2 precursor [Homo sapiens]'	NaN	NaN	NaN	NaN	NaN	5	2	NaN	5	7
459	'>gi|5032057|ref|NP_005611.1| protein S100-A11 [Homo sapiens]'	NaN	NaN	NaN	1	1	NaN	NaN	5	5	7
460	'>gi|52694752|ref|NP_001005340.1| transmembrane glycoprotein NMB isoform a precursor [Homo sapiens]'	NaN	NaN	NaN	NaN	5	NaN	NaN	2	5	7
461	'>gi|209862837|ref|NP_001129490.1| epoxide hydrolase 1 [Homo sapiens]'	NaN	NaN	NaN	NaN	5	1	NaN	NaN	5	6
462	'>Reverse >gi|224451128|ref|NP_001136272.1| protein eyes shut homolog isoform 1 precursor [Homo sapiens]'	NaN	NaN	NaN	NaN	NaN	NaN	5	NaN	5	5
463	'>Reverse >gi|530378914|ref|XP_005248407.1| PREDICTED: uncharacterized protein C5orf42 isoform X6 [Homo sapiens]'	NaN	NaN	NaN	5	NaN	NaN	NaN	NaN	5	5
464	'>Reverse >gi|578798836|ref|XP_006710602.1| PREDICTED: microtubule-actin cross-linking factor 1 isoform X28 [Homo sapiens]'	NaN	NaN	5	NaN	NaN	NaN	NaN	NaN	5	5
465	'>gi|10863927|ref|NP_066953.1| peptidyl-prolyl cis-trans isomerase A isoform 1 [Homo sapiens]'	NaN	NaN	NaN	5	NaN	NaN	NaN	NaN	5	5
466	'>gi|13559514|ref|NP_060895.1| phosphatidylinositol 4-kinase type 2-alpha [Homo sapiens]'	NaN	NaN	NaN	NaN	5	NaN	NaN	NaN	5	5
467	'>gi|13787217|ref|NP_001438.1| protocadherin Fat 2 precursor [Homo sapiens]'	NaN	NaN	NaN	NaN	5	NaN	NaN	NaN	5	5
468	'>gi|162417971|ref|NP_055567.2| signal peptidase complex subunit 2 [Homo sapiens]'	NaN	NaN	NaN	NaN	NaN	NaN	5	NaN	5	5
469	'>gi|172072620|ref|NP_055047.2| vesicle-associated membrane protein 2 [Homo sapiens]'	NaN	NaN	NaN	NaN	NaN	NaN	5	NaN	5	5
470	'>gi|193083114|ref|NP_001122386.1| poly(rC)-binding protein 2 isoform g [Homo sapiens]'	NaN	NaN	NaN	NaN	NaN	5	NaN	NaN	5	5
471	'>gi|19923750|ref|NP_002858.2| ras-related protein Rab-3B [Homo sapiens]'	NaN	NaN	NaN	NaN	NaN	NaN	5	NaN	5	5
472	'>gi|20270343|ref|NP_620150.1| ADP-ribosylation factor-like protein 8A isoform 1 [Homo sapiens]'	NaN	NaN	NaN	NaN	NaN	NaN	5	NaN	5	5
473	'>gi|210147446|ref|NP_872301.2| NXPE family member 2 [Homo sapiens]'	5	NaN	NaN	NaN	NaN	NaN	NaN	NaN	5	5
474	'>gi|210147457|ref|NP_001129737.1| intermediate filament family orphan 2 [Homo sapiens]'	NaN	NaN	NaN	NaN	5	NaN	NaN	NaN	5	5
475	'>gi|21361399|ref|NP_055040.2| serine/threonine-protein phosphatase 2A 65 kDa regulatory subunit A alpha isoform [Homo sapiens]'	NaN	NaN	NaN	NaN	5	NaN	NaN	NaN	5	5
476	'>gi|21361462|ref|NP_055416.2| EH domain-containing protein 2 [Homo sapiens]'	NaN	NaN	NaN	NaN	5	NaN	NaN	NaN	5	5
477	'>gi|21361591|ref|NP_057011.2| transforming growth factor beta-1-induced transcript 1 protein isoform 2 [Homo sapiens]'	NaN	NaN	NaN	NaN	5	NaN	NaN	NaN	5	5
478	'>gi|221316632|ref|NP_001137534.1| coatomer subunit beta [Homo sapiens]'	NaN	NaN	NaN	5	NaN	NaN	NaN	NaN	5	5
479	'>gi|222080086|ref|NP_001138356.1| zinc transporter 7 [Homo sapiens]'	NaN	NaN	NaN	NaN	NaN	5	NaN	NaN	5	5
480	'>gi|222144229|ref|NP_001138384.1| ubiquitin-like modifier-activating enzyme ATG7 isoform c [Homo sapiens]'	5	NaN	NaN	NaN	NaN	NaN	NaN	NaN	5	5
481	'>gi|269847750|ref|NP_001161396.1| protein CMSS1 isoform 2 [Homo sapiens]'	NaN	NaN	NaN	NaN	NaN	5	NaN	NaN	5	5
482	'>gi|30578410|ref|NP_849193.1| dolichyl-diphosphooligosaccharide--protein glycosyltransferase subunit STT3B [Homo sapiens]'	NaN	NaN	NaN	NaN	5	NaN	NaN	NaN	5	5
483	'>gi|308818200|ref|NP_001184223.1| dihydropyrimidinase-related protein 3 isoform 1 [Homo sapiens]'	NaN	NaN	NaN	NaN	5	NaN	NaN	NaN	5	5
484	'>gi|32454741|ref|NP_001226.2| serpin H1 precursor [Homo sapiens]'	NaN	NaN	NaN	NaN	5	NaN	NaN	NaN	5	5
485	'>gi|32484979|ref|NP_003655.3| AP-3 complex subunit beta-1 isoform 1 [Homo sapiens]'	NaN	NaN	5	NaN	NaN	NaN	NaN	NaN	5	5
486	'>gi|33359221|ref|NP_079150.3| dyslexia-associated protein KIAA0319-like protein [Homo sapiens]'	NaN	NaN	5	NaN	NaN	NaN	NaN	NaN	5	5
487	'>gi|337752170|ref|NP_001229687.1| HLA class I histocompatibility antigen, A-1 alpha chain precursor [Homo sapiens]'	NaN	NaN	NaN	NaN	5	NaN	NaN	NaN	5	5
488	'>gi|350529366|ref|NP_001231919.1| protein phosphatase 1 regulatory subunit 12A isoform c [Homo sapiens]'	NaN	NaN	NaN	NaN	5	NaN	NaN	NaN	5	5
489	'>gi|371502127|ref|NP_001243069.1| macrophage-capping protein isoform 2 [Homo sapiens]'	NaN	NaN	NaN	5	NaN	NaN	NaN	NaN	5	5
490	'>gi|374092020|ref|NP_006448.4| PDZ and LIM domain protein 5 isoform a [Homo sapiens]'	NaN	NaN	NaN	NaN	5	NaN	NaN	NaN	5	5
491	'>gi|38045913|ref|NP_937818.1| nucleoside diphosphate kinase A isoform a [Homo sapiens]'	NaN	NaN	NaN	5	NaN	NaN	NaN	NaN	5	5
492	'>gi|38683799|ref|NP_149112.1| ankyrin repeat domain-containing protein 13A [Homo sapiens]'	NaN	NaN	NaN	NaN	5	NaN	NaN	NaN	5	5
493	'>gi|4503301|ref|NP_001350.1| 2,4-dienoyl-CoA reductase, mitochondrial precursor [Homo sapiens]'	NaN	NaN	NaN	NaN	NaN	5	NaN	NaN	5	5
494	'>gi|4504437|ref|NP_002124.1| heme oxygenase 1 [Homo sapiens]'	NaN	NaN	NaN	5	NaN	NaN	NaN	NaN	5	5
495	'>gi|4504981|ref|NP_002296.1| galectin-1 [Homo sapiens]'	NaN	NaN	NaN	NaN	NaN	NaN	NaN	5	5	5
496	'>gi|4505753|ref|NP_002620.1| phosphoglycerate mutase 1 [Homo sapiens]'	NaN	NaN	NaN	5	NaN	NaN	NaN	NaN	5	5
497	'>gi|4506209|ref|NP_002794.1| 26S protease regulatory subunit 7 isoform 1 [Homo sapiens]'	NaN	NaN	NaN	NaN	5	NaN	NaN	NaN	5	5
498	'>gi|4506405|ref|NP_002872.1| ras-related protein Ral-B [Homo sapiens]'	NaN	NaN	NaN	NaN	NaN	NaN	5	NaN	5	5
499	'>gi|4506753|ref|NP_003698.1| ruvB-like 1 [Homo sapiens]'	NaN	NaN	NaN	NaN	5	NaN	NaN	NaN	5	5
500	'>gi|4507207|ref|NP_003121.1| sorcin isoform A [Homo sapiens]'	NaN	NaN	NaN	NaN	NaN	NaN	5	NaN	5	5
501	'>gi|4507813|ref|NP_003350.1| UDP-glucose 6-dehydrogenase isoform 1 [Homo sapiens]'	NaN	NaN	NaN	NaN	5	NaN	NaN	NaN	5	5
502	'>gi|48762920|ref|NP_002617.3| ATP-dependent 6-phosphofructokinase, liver type isoform b [Homo sapiens]'	NaN	NaN	NaN	NaN	5	NaN	NaN	NaN	5	5
503	'>gi|51477714|ref|NP_002363.2| alpha-mannosidase 2 [Homo sapiens]'	NaN	NaN	5	NaN	NaN	NaN	NaN	NaN	5	5
504	'>gi|533112488|ref|NP_001269209.1| pyrroline-5-carboxylate reductase 1, mitochondrial isoform 1 [Homo sapiens]'	NaN	NaN	NaN	NaN	NaN	NaN	5	NaN	5	5
505	'>gi|5453634|ref|NP_006132.1| cytoplasmic dynein 1 light intermediate chain 2 isoform 1 [Homo sapiens]'	NaN	NaN	NaN	NaN	5	NaN	NaN	NaN	5	5
506	'>gi|55770888|ref|NP_003557.2| early endosome antigen 1 [Homo sapiens]'	NaN	NaN	5	NaN	NaN	NaN	NaN	NaN	5	5
507	'>gi|578801314|ref|XP_006711531.1| PREDICTED: protein S100-A14 isoform X2 [Homo sapiens]'	NaN	NaN	NaN	NaN	5	NaN	NaN	NaN	5	5
508	'>gi|63079718|ref|NP_542432.2| three prime repair exonuclease 2 [Homo sapiens]'	NaN	NaN	NaN	5	NaN	NaN	NaN	NaN	5	5
509	'>gi|72534712|ref|NP_001026881.1| endoplasmic reticulum-Golgi intermediate compartment protein 1 [Homo sapiens]'	NaN	NaN	NaN	NaN	NaN	5	NaN	NaN	5	5
510	'>gi|8922712|ref|NP_060713.1| septin-11 [Homo sapiens]'	NaN	NaN	NaN	NaN	5	NaN	NaN	NaN	5	5
511	'>gi|93277122|ref|NP_002887.2| RNA-binding protein 4 isoform 1 [Homo sapiens]'	NaN	NaN	NaN	NaN	NaN	5	NaN	NaN	5	5
512	'>gi|9665234|ref|NP_062564.1| interleukin-36 gamma isoform 1 [Homo sapiens]'	NaN	NaN	NaN	5	NaN	NaN	NaN	NaN	5	5
513	'>gi|156523268|ref|NP_689506.2| transcriptional adapter 2-beta [Homo sapiens]'	2	2	NaN	4	2	NaN	NaN	2	4	12
514	'>gi|578815970|ref|XP_006716621.1| PREDICTED: RNA-binding protein 12B isoform X5 [Homo sapiens]'	3	NaN	1	4	NaN	2	NaN	2	4	12
515	'>gi|158937236|ref|NP_006301.3| puromycin-sensitive aminopeptidase [Homo sapiens]'	NaN	NaN	NaN	4	4	NaN	3	NaN	4	11
516	'>gi|189011550|ref|NP_001120977.1| acid ceramidase isoform c [Homo sapiens]'	4	NaN	1	NaN	4	2	NaN	NaN	4	11
517	'>gi|4506179|ref|NP_002777.1| proteasome subunit alpha type-1 isoform 2 [Homo sapiens]'	4	NaN	NaN	NaN	NaN	3	3	NaN	4	10
518	'>gi|5803185|ref|NP_006745.1| synaptophysin-like protein 1 isoform a [Homo sapiens]'	1	NaN	NaN	NaN	1	4	4	NaN	4	10
519	'>gi|23110960|ref|NP_001324.2| cathepsin L2 preproprotein [Homo sapiens]'	4	NaN	NaN	NaN	4	1	NaN	NaN	4	9
520	'>gi|109148552|ref|NP_476429.2| keratin, type II cytoskeletal 3 [Homo sapiens]'	3	NaN	NaN	NaN	4	NaN	NaN	1	4	8
521	'>gi|197116348|ref|NP_001127666.1| prostatic acid phosphatase isoform TM-PAP precursor [Homo sapiens]'	3	NaN	NaN	1	4	NaN	NaN	NaN	4	8
522	'>gi|203098098|ref|NP_065910.3| protein Shroom3 [Homo sapiens]'	4	NaN	NaN	NaN	4	NaN	NaN	NaN	4	8
523	'>gi|311771647|ref|NP_001185709.1| actin-related protein 2/3 complex subunit 4 isoform c [Homo sapiens]'	NaN	NaN	NaN	4	1	NaN	NaN	3	4	8
524	'>gi|42822868|ref|NP_976321.1| ribonuclease inhibitor [Homo sapiens]'	NaN	NaN	1	NaN	4	3	NaN	NaN	4	8
525	'>gi|48255907|ref|NP_001001522.1| transgelin [Homo sapiens]'	NaN	NaN	NaN	NaN	NaN	4	4	NaN	4	8
526	'>gi|7657532|ref|NP_055439.1| protein S100-A6 [Homo sapiens]'	NaN	NaN	NaN	NaN	NaN	NaN	4	4	4	8
527	'>Reverse >gi|304434526|ref|NP_001073966.2| multiple epidermal growth factor-like domains protein 9 precursor [Homo sapiens]'	NaN	NaN	NaN	3	NaN	4	NaN	NaN	4	7
528	'>Reverse >gi|597709777|ref|NP_001243000.2| E3 ubiquitin-protein ligase RNF213 isoform 3 [Homo sapiens]'	NaN	NaN	3	NaN	NaN	NaN	4	NaN	4	7
529	'>gi|161169015|ref|NP_001104488.1| neuron navigator 2 isoform 3 [Homo sapiens]'	NaN	NaN	1	NaN	2	4	NaN	NaN	4	7
530	'>gi|28827815|ref|NP_789793.1| protein S100-A7A [Homo sapiens]'	NaN	NaN	NaN	1	NaN	2	NaN	4	4	7
531	'>gi|34098946|ref|NP_004550.2| nuclease-sensitive element-binding protein 1 [Homo sapiens]'	NaN	NaN	NaN	NaN	3	4	NaN	NaN	4	7
532	'>gi|374093203|ref|NP_001243354.1| PDZ and LIM domain protein 5 isoform c [Homo sapiens]'	NaN	NaN	NaN	NaN	NaN	3	4	NaN	4	7
533	'>gi|4557565|ref|NP_000115.1| DNA excision repair protein ERCC-6 [Homo sapiens]'	4	NaN	NaN	3	NaN	NaN	NaN	NaN	4	7
534	'>gi|5031635|ref|NP_005498.1| cofilin-1 [Homo sapiens]'	NaN	NaN	NaN	4	NaN	NaN	3	NaN	4	7
535	'>Reverse >gi|282165810|ref|NP_001163887.1| tight junction protein ZO-2 isoform 3 [Homo sapiens]'	NaN	NaN	NaN	NaN	NaN	NaN	4	2	4	6
536	'>Reverse >gi|54112403|ref|NP_060250.2| chromodomain-helicase-DNA-binding protein 7 [Homo sapiens]'	NaN	NaN	2	NaN	NaN	NaN	NaN	4	4	6
537	'''>gi|206597515|ref|NP_001128662.1| arf-GAP with Rho-GAP domain, ANK repeat and PH domain-containing protein 1 isoform d [Homo sap...'' <Preview truncated at 128 characters>'	NaN	NaN	4	NaN	2	NaN	NaN	NaN	4	6
538	'>gi|22538465|ref|NP_002786.2| proteasome subunit beta type-3 [Homo sapiens]'	2	NaN	NaN	NaN	NaN	NaN	4	NaN	4	6
539	'>gi|388240772|ref|NP_001252520.1| reticulon-3 isoform g [Homo sapiens]'	NaN	NaN	NaN	NaN	NaN	NaN	2	4	4	6
540	'''>gi|410170418|ref|XP_003959962.1| PREDICTED: arf-GAP with GTPase, ANK repeat and PH domain-containing protein 2-like [Homo sapie...'' <Preview truncated at 128 characters>'	NaN	2	NaN	NaN	NaN	NaN	4	NaN	4	6
541	'>gi|4503987|ref|NP_003869.1| gamma-glutamyl hydrolase precursor [Homo sapiens]'	NaN	NaN	NaN	NaN	2	NaN	NaN	4	4	6
542	'>gi|4504505|ref|NP_000405.1| peroxisomal multifunctional enzyme type 2 isoform 2 [Homo sapiens]'	NaN	NaN	NaN	NaN	4	NaN	NaN	2	4	6
543	'>gi|4506193|ref|NP_002784.1| proteasome subunit beta type-1 [Homo sapiens]'	NaN	NaN	NaN	NaN	NaN	2	4	NaN	4	6
544	'>gi|4506631|ref|NP_000980.1| 60S ribosomal protein L30 [Homo sapiens]'	NaN	NaN	NaN	NaN	NaN	NaN	2	4	4	6
545	'>gi|538919948|ref|NP_001269333.1| malate dehydrogenase, mitochondrial isoform 3 [Homo sapiens]'	NaN	NaN	NaN	4	2	NaN	NaN	NaN	4	6
546	'>gi|5453998|ref|NP_006382.1| importin-7 [Homo sapiens]'	NaN	NaN	2	4	NaN	NaN	NaN	NaN	4	6
547	'>sp|K22E_HUMAN|(Common contaminant protein)'	NaN	NaN	NaN	NaN	2	NaN	NaN	4	4	6
548	'>gi|114431246|ref|NP_853513.2| keratin, type I cytoskeletal 28 [Homo sapiens]'	NaN	4	NaN	NaN	NaN	NaN	1	NaN	4	5
549	'>gi|229091322|ref|NP_001153199.1| putative phospholipase B-like 2 isoform 2 precursor [Homo sapiens]'	NaN	NaN	NaN	NaN	4	NaN	1	NaN	4	5
550	'>gi|23110942|ref|NP_002781.2| proteasome subunit alpha type-5 isoform 1 [Homo sapiens]'	4	NaN	NaN	NaN	1	NaN	NaN	NaN	4	5
551	'>gi|32401427|ref|NP_110426.4| protein YIPF5 isoform a [Homo sapiens]'	NaN	NaN	NaN	NaN	NaN	1	4	NaN	4	5
552	'>gi|385298707|ref|NP_001245288.1| hippocalcin-like protein 1 [Homo sapiens]'	NaN	NaN	NaN	NaN	NaN	1	4	NaN	4	5
553	'>gi|530431917|ref|XP_005277372.1| PREDICTED: 40S ribosomal protein S9 isoform X14 [Homo sapiens]'	NaN	NaN	NaN	1	NaN	NaN	NaN	4	4	5
554	'>gi|550544224|ref|NP_001272389.1| ras GTPase-activating-like protein IQGAP2 isoform 2 [Homo sapiens]'	NaN	NaN	4	1	NaN	NaN	NaN	NaN	4	5
555	'>gi|5803165|ref|NP_006799.1| protein transport protein Sec61 subunit beta [Homo sapiens]'	NaN	NaN	NaN	1	NaN	NaN	NaN	4	4	5
556	'>gi|73466520|ref|NP_001026976.1| fatty aldehyde dehydrogenase isoform 1 [Homo sapiens]'	NaN	NaN	NaN	1	4	NaN	NaN	NaN	4	5
557	'>Reverse >gi|225690502|ref|NP_001139500.1| junctophilin-4 [Homo sapiens]'	NaN	NaN	4	NaN	NaN	NaN	NaN	NaN	4	4
558	'>Reverse >gi|23097308|ref|NP_149062.1| nesprin-1 isoform 2 [Homo sapiens]'	NaN	NaN	4	NaN	NaN	NaN	NaN	NaN	4	4
559	'>Reverse >gi|530419811|ref|XP_005261530.1| PREDICTED: bromodomain-containing protein 1 isoform X4 [Homo sapiens]'	4	NaN	NaN	NaN	NaN	NaN	NaN	NaN	4	4
560	'>Reverse >gi|538260577|ref|NP_001269307.1| tripartite motif-containing protein 46 isoform 5 [Homo sapiens]'	NaN	NaN	NaN	NaN	4	NaN	NaN	NaN	4	4
561	'>gi|110611228|ref|NP_009055.2| utrophin [Homo sapiens]'	NaN	NaN	NaN	NaN	4	NaN	NaN	NaN	4	4
562	'>gi|113722120|ref|NP_115495.3| G-protein coupled receptor 98 precursor [Homo sapiens]'	NaN	4	NaN	NaN	NaN	NaN	NaN	NaN	4	4
563	'>gi|116812591|ref|NP_008964.3| protein RER1 [Homo sapiens]'	NaN	NaN	NaN	NaN	NaN	NaN	4	NaN	4	4
564	'>gi|122937275|ref|NP_001073907.1| alpha 1,3-galactosyltransferase 2 [Homo sapiens]'	NaN	NaN	4	NaN	NaN	NaN	NaN	NaN	4	4
565	'>gi|133925811|ref|NP_002261.3| transportin-1 isoform 1 [Homo sapiens]'	NaN	NaN	NaN	4	NaN	NaN	NaN	NaN	4	4
566	'>gi|151101292|ref|NP_110382.3| thioredoxin-related transmembrane protein 1 precursor [Homo sapiens]'	NaN	NaN	NaN	NaN	NaN	4	NaN	NaN	4	4
567	'>gi|157389005|ref|NP_001739.2| calpain-2 catalytic subunit isoform 1 [Homo sapiens]'	NaN	NaN	NaN	NaN	4	NaN	NaN	NaN	4	4
568	'>gi|169404009|ref|NP_003135.2| translocon-associated protein subunit alpha isoform 1 precursor [Homo sapiens]'	NaN	NaN	NaN	NaN	NaN	4	NaN	NaN	4	4
569	'>gi|189011548|ref|NP_808592.2| acid ceramidase isoform a preproprotein [Homo sapiens]'	NaN	NaN	NaN	NaN	NaN	NaN	NaN	4	4	4
570	'>gi|197313732|ref|NP_001127911.1| pleckstrin homology-like domain family B member 2 isoform a [Homo sapiens]'	NaN	NaN	4	NaN	NaN	NaN	NaN	NaN	4	4
571	'>gi|19923483|ref|NP_057406.2| ras-related protein Rab-14 [Homo sapiens]'	NaN	NaN	NaN	NaN	NaN	NaN	4	NaN	4	4
572	'>gi|19923790|ref|NP_036546.2| rab3 GTPase-activating protein non-catalytic subunit [Homo sapiens]'	NaN	NaN	4	NaN	NaN	NaN	NaN	NaN	4	4
573	'>gi|21327705|ref|NP_644806.1| kallikrein-7 isoform 1 preproprotein [Homo sapiens]'	NaN	NaN	NaN	NaN	NaN	NaN	4	NaN	4	4
574	'>gi|21361322|ref|NP_006078.2| tubulin beta-4A chain isoform 3 [Homo sapiens]'	NaN	NaN	NaN	NaN	4	NaN	NaN	NaN	4	4
575	'>gi|225703079|ref|NP_077274.3| lysophospholipid acyltransferase 7 isoform 1 [Homo sapiens]'	NaN	NaN	NaN	NaN	NaN	4	NaN	NaN	4	4
576	'>gi|238908501|ref|NP_001154178.1| sciellin isoform 3 [Homo sapiens]'	NaN	NaN	NaN	4	NaN	NaN	NaN	NaN	4	4
577	'>gi|308387374|ref|NP_001184147.1| cAMP-specific 3'',5''-cyclic phosphodiesterase 4D isoform PDE4D5 [Homo sapiens]'	NaN	4	NaN	NaN	NaN	NaN	NaN	NaN	4	4
578	'>gi|315013542|ref|NP_001186652.1| cellular retinoic acid-binding protein 2 [Homo sapiens]'	NaN	NaN	NaN	4	NaN	NaN	NaN	NaN	4	4
579	'>gi|31563524|ref|NP_852667.1| myosin regulatory light polypeptide 9 isoform b [Homo sapiens]'	NaN	NaN	NaN	4	NaN	NaN	NaN	NaN	4	4
580	'>gi|321267511|ref|NP_001189431.1| protein NipSnap homolog 1 isoform 2 [Homo sapiens]'	NaN	NaN	NaN	NaN	NaN	4	NaN	NaN	4	4
581	'>gi|332688231|ref|NP_001193875.1| phosphatidylinositol-binding clathrin assembly protein isoform 3 [Homo sapiens]'	NaN	NaN	NaN	NaN	4	NaN	NaN	NaN	4	4
582	'>gi|34485706|ref|NP_899057.1| ras-related protein Rab-27A [Homo sapiens]'	NaN	NaN	NaN	NaN	NaN	NaN	4	NaN	4	4
583	'>gi|358030308|ref|NP_001239589.1| band 4.1-like protein 2 isoform d [Homo sapiens]'	NaN	NaN	4	NaN	NaN	NaN	NaN	NaN	4	4
584	'>gi|36029914|ref|NP_079330.2| deubiquitinating protein VCIP135 [Homo sapiens]'	NaN	4	NaN	NaN	NaN	NaN	NaN	NaN	4	4
585	'>gi|388454220|ref|NP_001252541.1| CCR4-NOT transcription complex subunit 1 isoform c [Homo sapiens]'	NaN	NaN	NaN	NaN	4	NaN	NaN	NaN	4	4
586	'>gi|39777597|ref|NP_004604.2| protein-glutamine gamma-glutamyltransferase 2 isoform a [Homo sapiens]'	NaN	NaN	NaN	NaN	4	NaN	NaN	NaN	4	4
587	'>gi|40805858|ref|NP_954993.1| isthmin-2 isoform 1 precursor [Homo sapiens]'	NaN	NaN	NaN	4	NaN	NaN	NaN	NaN	4	4
588	'>gi|41393547|ref|NP_056993.2| neuroblastoma-amplified sequence [Homo sapiens]'	NaN	4	NaN	NaN	NaN	NaN	NaN	NaN	4	4
589	'>gi|42518068|ref|NP_006455.2| trans-Golgi network integral membrane protein 2 isoform 1 precursor [Homo sapiens]'	NaN	NaN	NaN	4	NaN	NaN	NaN	NaN	4	4
590	'>gi|42558246|ref|NP_872357.2| lysocardiolipin acyltransferase 1 isoform 1 [Homo sapiens]'	NaN	NaN	NaN	NaN	NaN	4	NaN	NaN	4	4
591	'>gi|425876796|ref|NP_001182220.2| serpin B6 isoform b [Homo sapiens]'	NaN	NaN	NaN	NaN	NaN	4	NaN	NaN	4	4
592	'>gi|42822866|ref|NP_976323.1| ribonuclease inhibitor [Homo sapiens]'	NaN	NaN	NaN	NaN	4	NaN	NaN	NaN	4	4
593	'>gi|4502107|ref|NP_001145.1| annexin A5 [Homo sapiens]'	NaN	NaN	NaN	4	NaN	NaN	NaN	NaN	4	4
594	'>gi|4502261|ref|NP_000479.1| antithrombin-III precursor [Homo sapiens]'	NaN	NaN	NaN	NaN	NaN	NaN	NaN	4	4	4
595	'>gi|4503475|ref|NP_001949.1| elongation factor 1-alpha 2 [Homo sapiens]'	4	NaN	NaN	NaN	NaN	NaN	NaN	NaN	4	4
596	'>gi|4503509|ref|NP_003741.1| eukaryotic translation initiation factor 3 subunit A [Homo sapiens]'	NaN	NaN	4	NaN	NaN	NaN	NaN	NaN	4	4
597	'>gi|4503515|ref|NP_003747.1| eukaryotic translation initiation factor 3 subunit H [Homo sapiens]'	NaN	NaN	NaN	NaN	NaN	4	NaN	NaN	4	4
598	'>gi|4503529|ref|NP_001407.1| eukaryotic initiation factor 4A-I isoform 1 [Homo sapiens]'	NaN	NaN	NaN	NaN	4	NaN	NaN	NaN	4	4
599	'>gi|4504523|ref|NP_002148.1| 10 kDa heat shock protein, mitochondrial [Homo sapiens]'	NaN	NaN	NaN	4	NaN	NaN	NaN	NaN	4	4
600	'>gi|4505257|ref|NP_002435.1| moesin [Homo sapiens]'	NaN	NaN	NaN	4	NaN	NaN	NaN	NaN	4	4
601	'>gi|4506201|ref|NP_002788.1| proteasome subunit beta type-5 isoform 1 [Homo sapiens]'	NaN	NaN	NaN	NaN	NaN	NaN	4	NaN	4	4
602	'>gi|4506761|ref|NP_002957.1| protein S100-A10 [Homo sapiens]'	NaN	NaN	NaN	NaN	NaN	NaN	NaN	4	4	4
603	'>gi|45439306|ref|NP_001340.2| aspartate--tRNA ligase, cytoplasmic isoform 1 [Homo sapiens]'	NaN	NaN	NaN	NaN	4	NaN	NaN	NaN	4	4
604	'>gi|46249393|ref|NP_001656.2| rho-related GTP-binding protein RhoG precursor [Homo sapiens]'	NaN	NaN	NaN	NaN	NaN	NaN	4	NaN	4	4
605	'>gi|4758950|ref|NP_000933.1| peptidyl-prolyl cis-trans isomerase B precursor [Homo sapiens]'	NaN	NaN	NaN	4	NaN	NaN	NaN	NaN	4	4
606	'>gi|49574502|ref|NP_057327.2| NADH-cytochrome b5 reductase 1 [Homo sapiens]'	NaN	NaN	NaN	NaN	NaN	4	NaN	NaN	4	4
607	'>gi|5031777|ref|NP_005521.1| isocitrate dehydrogenase [NAD] subunit alpha, mitochondrial precursor [Homo sapiens]'	NaN	NaN	NaN	NaN	NaN	4	NaN	NaN	4	4
608	'>gi|5031877|ref|NP_005564.1| lamin-B1 isoform 1 [Homo sapiens]'	NaN	NaN	NaN	4	NaN	NaN	NaN	NaN	4	4
609	'>gi|50345988|ref|NP_001001973.1| ATP synthase subunit gamma, mitochondrial isoform L (liver) precursor [Homo sapiens]'	NaN	NaN	NaN	NaN	NaN	4	NaN	NaN	4	4
610	'>gi|50428938|ref|NP_004308.2| ATPase ASNA1 {ECO:0000255|HAMAP-Rule:MF_03112} [Homo sapiens]'	NaN	NaN	NaN	NaN	NaN	4	NaN	NaN	4	4
611	'>gi|510025481|ref|NP_001265367.1| fibronectin type-III domain-containing protein 3A isoform 1 [Homo sapiens]'	NaN	NaN	4	NaN	NaN	NaN	NaN	NaN	4	4
612	'>gi|51036603|ref|NP_061329.3| guanine nucleotide-binding protein G(I)/G(S)/G(O) subunit gamma-12 precursor [Homo sapiens]'	NaN	NaN	NaN	NaN	NaN	NaN	NaN	4	4	4
613	'>gi|530368861|ref|XP_005264105.1| PREDICTED: mitogen-activated protein kinase kinase kinase kinase 4 isoform X5 [Homo sapiens]'	NaN	NaN	4	NaN	NaN	NaN	NaN	NaN	4	4
614	'>gi|5453603|ref|NP_006422.1| T-complex protein 1 subunit beta isoform 1 [Homo sapiens]'	NaN	NaN	NaN	NaN	4	NaN	NaN	NaN	4	4
615	'>gi|5454140|ref|NP_006283.1| tumor susceptibility gene 101 protein [Homo sapiens]'	NaN	NaN	NaN	NaN	4	NaN	NaN	NaN	4	4
616	'>gi|554790263|ref|NP_001272985.1| calponin-3 isoform 3 [Homo sapiens]'	NaN	NaN	NaN	NaN	NaN	4	NaN	NaN	4	4
617	'>gi|559098473|ref|NP_001273975.1| endophilin-B2 isoform b [Homo sapiens]'	NaN	NaN	NaN	NaN	4	NaN	NaN	NaN	4	4
618	'>gi|567757558|ref|NP_001274666.1| protein SETSIP [Homo sapiens]'	NaN	NaN	NaN	4	NaN	NaN	NaN	NaN	4	4
619	'>gi|5729875|ref|NP_006658.1| membrane-associated progesterone receptor component 1 isoform 1 [Homo sapiens]'	NaN	NaN	NaN	NaN	NaN	NaN	4	NaN	4	4
620	'>gi|578810391|ref|XP_006714694.1| PREDICTED: probable glutathione peroxidase 8 isoform X1 [Homo sapiens]'	NaN	NaN	NaN	NaN	NaN	NaN	4	NaN	4	4
621	'>gi|578846507|ref|XP_006726810.1| PREDICTED: uncharacterized protein LOC102723805 isoform X1 [Homo sapiens]'	NaN	NaN	4	NaN	NaN	NaN	NaN	NaN	4	4
622	'>gi|5803187|ref|NP_006746.1| transaldolase [Homo sapiens]'	NaN	NaN	NaN	4	NaN	NaN	NaN	NaN	4	4
623	'>gi|6005830|ref|NP_009114.1| plakophilin-3 [Homo sapiens]'	NaN	NaN	NaN	4	NaN	NaN	NaN	NaN	4	4
624	'>gi|609878488|ref|NP_001278320.1| transcriptional regulator ERG isoform 7 [Homo sapiens]'	NaN	NaN	NaN	NaN	4	NaN	NaN	NaN	4	4
625	'>gi|666335594|ref|NP_001287955.1| tight junction protein ZO-1 isoform d [Homo sapiens]'	NaN	NaN	4	NaN	NaN	NaN	NaN	NaN	4	4
626	'>gi|87159836|ref|NP_001034581.1| four and a half LIM domains protein 2 [Homo sapiens]'	NaN	NaN	NaN	NaN	NaN	4	NaN	NaN	4	4
627	'>gi|8922601|ref|NP_060654.1| ADP-ribosylation factor-like protein 8B [Homo sapiens]'	NaN	NaN	NaN	NaN	NaN	NaN	NaN	4	4	4
628	'>gi|91807125|ref|NP_001035109.1| protein FAM3C precursor [Homo sapiens]'	NaN	NaN	NaN	NaN	NaN	NaN	4	NaN	4	4
629	'>gi|4557699|ref|NP_000214.1| keratin, type I cytoskeletal 12 [Homo sapiens]'	3	2	2	2	3	2	3	NaN	3	17
630	'>gi|50540545|ref|NP_055739.2| beclin 1-associated autophagy-related key regulator [Homo sapiens]'	2	3	2	NaN	NaN	1	3	3	3	14
631	'>gi|67003568|ref|NP_001019850.1| skin-specific protein 32 [Homo sapiens]'	2	2	NaN	3	NaN	1	1	1	3	10
632	'>gi|4505893|ref|NP_002659.1| proteolipid protein 2 [Homo sapiens]'	1	NaN	NaN	1	NaN	NaN	3	3	3	8
633	'>gi|460417294|ref|NP_001264069.1| actin-related protein 3 isoform 2 [Homo sapiens]'	NaN	NaN	NaN	3	3	NaN	NaN	2	3	8
634	'>gi|83700235|ref|NP_001958.2| eukaryotic initiation factor 4A-II [Homo sapiens]'	NaN	NaN	NaN	2	NaN	1	2	3	3	8
635	'>gi|34419635|ref|NP_002146.2| heat shock 70 kDa protein 6 [Homo sapiens]'	NaN	NaN	1	3	2	NaN	NaN	1	3	7
636	'>gi|4506203|ref|NP_002790.1| proteasome subunit beta type-7 proprotein [Homo sapiens]'	3	NaN	NaN	NaN	NaN	1	3	NaN	3	7
637	'''>gi|522023554|ref|NP_001265571.1| EGF-like repeat and discoidin I-like domain-containing protein 3 isoform 2 precursor [Homo sap...'' <Preview truncated at 128 characters>'	NaN	2	NaN	NaN	2	3	NaN	NaN	3	7
638	'>gi|126157508|ref|NP_996898.2| inactive N-acetylated-alpha-linked acidic dipeptidase-like protein 2 [Homo sapiens]'	NaN	3	1	NaN	NaN	NaN	2	NaN	3	6
639	'>gi|164519138|ref|NP_001106819.1| endothelin-converting enzyme 1 isoform 4 [Homo sapiens]'	NaN	NaN	3	3	NaN	NaN	NaN	NaN	3	6
640	'>gi|260099676|ref|NP_001159418.1| insulin-degrading enzyme isoform 2 [Homo sapiens]'	NaN	NaN	NaN	NaN	NaN	3	2	1	3	6
641	'>gi|528078329|ref|NP_001268446.1| centrosomal protein of 85 kDa isoform 2 [Homo sapiens]'	NaN	NaN	NaN	3	3	NaN	NaN	NaN	3	6
642	'>gi|530417433|ref|XP_005259401.1| PREDICTED: centrosomal protein of 89 kDa isoform X2 [Homo sapiens]'	NaN	NaN	3	NaN	3	NaN	NaN	NaN	3	6
643	'>gi|5454166|ref|NP_006361.1| vesicle transport through interaction with t-SNAREs homolog 1B [Homo sapiens]'	NaN	NaN	NaN	NaN	NaN	3	3	NaN	3	6
644	'>Reverse >gi|4503355|ref|NP_001371.1| dedicator of cytokinesis protein 1 isoform 2 [Homo sapiens]'	2	NaN	NaN	NaN	3	NaN	NaN	NaN	3	5
645	'>gi|14043070|ref|NP_112420.1| heterogeneous nuclear ribonucleoprotein A1 isoform b [Homo sapiens]'	NaN	NaN	NaN	2	NaN	3	NaN	NaN	3	5
646	'>gi|14165439|ref|NP_002131.2| heterogeneous nuclear ribonucleoprotein K isoform a [Homo sapiens]'	NaN	NaN	NaN	2	3	NaN	NaN	NaN	3	5
647	'>gi|221316614|ref|NP_004416.2| extracellular matrix protein 1 isoform 1 precursor [Homo sapiens]'	3	NaN	NaN	1	1	NaN	NaN	NaN	3	5
648	'>gi|394025725|ref|NP_001257377.1| very long-chain specific acyl-CoA dehydrogenase, mitochondrial isoform 4 [Homo sapiens]'	NaN	NaN	2	3	NaN	NaN	NaN	NaN	3	5
649	'>gi|429836877|ref|NP_001258847.1| signal peptidase complex catalytic subunit SEC11A isoform 5 [Homo sapiens]'	NaN	NaN	NaN	NaN	NaN	NaN	2	3	3	5
650	'>gi|7661922|ref|NP_055814.1| ras-related protein Rab-21 [Homo sapiens]'	NaN	NaN	NaN	NaN	NaN	2	3	NaN	3	5
651	'>Reverse >gi|315221143|ref|NP_001186726.1| tyrosine-protein phosphatase non-receptor type 7 isoform 3 [Homo sapiens]'	NaN	NaN	NaN	NaN	1	NaN	3	NaN	3	4
652	'>gi|119395729|ref|NP_000299.2| lysosomal protective protein isoform a precursor [Homo sapiens]'	3	NaN	NaN	NaN	NaN	1	NaN	NaN	3	4
653	'''>gi|194688149|ref|NP_001124164.1| serine/threonine-protein phosphatase 2B catalytic subunit alpha isoform isoform 3 [Homo sapien...'' <Preview truncated at 128 characters>'	NaN	NaN	NaN	NaN	3	1	NaN	NaN	3	4
654	'>gi|209862883|ref|NP_001129513.1| histone deacetylase 11 isoform 2 [Homo sapiens]'	NaN	NaN	3	NaN	1	NaN	NaN	NaN	3	4
655	'>gi|22538437|ref|NP_680093.1| cathepsin B preproprotein [Homo sapiens]'	NaN	NaN	NaN	NaN	3	NaN	1	NaN	3	4
656	'>gi|23110925|ref|NP_002789.1| proteasome subunit beta type-6 isoform 1 proprotein [Homo sapiens]'	NaN	NaN	NaN	NaN	NaN	NaN	3	1	3	4
657	'>gi|24475816|ref|NP_612510.1| very-long-chain enoyl-CoA reductase [Homo sapiens]'	NaN	NaN	NaN	NaN	NaN	1	NaN	3	3	4
658	'>gi|27777657|ref|NP_776249.1| serpin A12 precursor [Homo sapiens]'	3	1	NaN	NaN	NaN	NaN	NaN	NaN	3	4
659	'>gi|315139006|ref|NP_001186708.1| proteasome subunit beta type-2 isoform 2 [Homo sapiens]'	NaN	NaN	NaN	NaN	1	NaN	3	NaN	3	4
660	'>gi|315360622|ref|NP_001186746.1| gamma-glutamylcyclotransferase isoform 4 [Homo sapiens]'	NaN	1	3	NaN	NaN	NaN	NaN	NaN	3	4
661	'>gi|4506613|ref|NP_000974.1| 60S ribosomal protein L22 proprotein [Homo sapiens]'	NaN	NaN	NaN	1	NaN	NaN	NaN	3	3	4
662	'>gi|530402381|ref|XP_005266454.1| PREDICTED: LIM domain only protein 7 isoform X23 [Homo sapiens]'	NaN	NaN	NaN	3	NaN	NaN	1	NaN	3	4
663	'>gi|530411966|ref|XP_005257299.1| PREDICTED: polymerase I and transcript release factor isoform X2 [Homo sapiens]'	NaN	NaN	NaN	NaN	NaN	NaN	1	3	3	4
664	'>gi|578805299|ref|XP_006712951.1| PREDICTED: ankyrin repeat domain-containing protein 36C isoform X1 [Homo sapiens]'	NaN	NaN	NaN	NaN	NaN	3	NaN	1	3	4
665	'>Reverse >gi|116805332|ref|NP_005089.2| musculin [Homo sapiens]'	NaN	NaN	NaN	NaN	3	NaN	NaN	NaN	3	3
666	'>Reverse >gi|117606355|ref|NP_075463.2| protein furry homolog [Homo sapiens]'	NaN	NaN	3	NaN	NaN	NaN	NaN	NaN	3	3
667	'>Reverse >gi|194239709|ref|NP_001123522.1| dedicator of cytokinesis protein 9 isoform d [Homo sapiens]'	NaN	NaN	NaN	3	NaN	NaN	NaN	NaN	3	3
668	'>Reverse >gi|197333695|ref|NP_001127949.1| poly(A)-specific ribonuclease PARN isoform 2 [Homo sapiens]'	NaN	NaN	NaN	NaN	NaN	3	NaN	NaN	3	3
669	'>Reverse >gi|312434011|ref|NP_001186084.1| histone acetyltransferase KAT7 isoform 2 [Homo sapiens]'	NaN	NaN	3	NaN	NaN	NaN	NaN	NaN	3	3
670	'>Reverse >gi|32469509|ref|NP_862825.1| zinc finger and BTB domain-containing protein 12 [Homo sapiens]'	NaN	NaN	3	NaN	NaN	NaN	NaN	NaN	3	3
671	'>Reverse >gi|40255149|ref|NP_694945.2| rho guanine nucleotide exchange factor 19 [Homo sapiens]'	NaN	NaN	NaN	NaN	NaN	NaN	3	NaN	3	3
672	'>Reverse >gi|4502659|ref|NP_003821.1| sialic acid-binding Ig-like lectin 5 precursor [Homo sapiens]'	NaN	3	NaN	NaN	NaN	NaN	NaN	NaN	3	3
673	'>Reverse >gi|530374326|ref|XP_005247370.1| PREDICTED: target of Nesh-SH3 isoform X33 [Homo sapiens]'	NaN	NaN	NaN	NaN	NaN	NaN	3	NaN	3	3
674	'>Reverse >gi|530414438|ref|XP_005259765.1| PREDICTED: histone-arginine methyltransferase CARM1 isoform X1 [Homo sapiens]'	NaN	NaN	NaN	NaN	3	NaN	NaN	NaN	3	3
675	'>Reverse >gi|7706457|ref|NP_057332.1| A-kinase anchor protein 11 [Homo sapiens]'	NaN	NaN	NaN	NaN	NaN	3	NaN	NaN	3	3
676	'>gi|10190712|ref|NP_065723.1| protein S100-A14 [Homo sapiens]'	NaN	NaN	NaN	NaN	NaN	NaN	NaN	3	3	3
677	'>gi|109148522|ref|NP_001035835.1| insulin, isoform 2 precursor [Homo sapiens]'	NaN	3	NaN	NaN	NaN	NaN	NaN	NaN	3	3
678	'>gi|109452587|ref|NP_775882.2| protein FAM98B [Homo sapiens]'	NaN	NaN	NaN	NaN	NaN	NaN	NaN	3	3	3
679	'>gi|11055992|ref|NP_067639.1| retinoid-inducible serine carboxypeptidase precursor [Homo sapiens]'	NaN	NaN	NaN	NaN	NaN	3	NaN	NaN	3	3
680	'>gi|115387104|ref|NP_000687.3| 4-trimethylaminobutyraldehyde dehydrogenase [Homo sapiens]'	NaN	NaN	NaN	NaN	3	NaN	NaN	NaN	3	3
681	'>gi|115527097|ref|NP_006026.3| serine/threonine-protein kinase MRCK beta [Homo sapiens]'	NaN	NaN	3	NaN	NaN	NaN	NaN	NaN	3	3
682	'>gi|116256358|ref|NP_004857.4| secretory carrier-associated membrane protein 1 isoform 1 [Homo sapiens]'	NaN	NaN	NaN	NaN	NaN	3	NaN	NaN	3	3
683	'>gi|118600961|ref|NP_065076.2| ral GTPase-activating protein subunit alpha-2 [Homo sapiens]'	NaN	NaN	3	NaN	NaN	NaN	NaN	NaN	3	3
684	'>gi|119943112|ref|NP_001351.2| 7-dehydrocholesterol reductase [Homo sapiens]'	NaN	NaN	NaN	NaN	NaN	3	NaN	NaN	3	3
685	'>gi|124494247|ref|NP_001074419.1| unconventional myosin-Ic isoform b [Homo sapiens]'	NaN	NaN	NaN	3	NaN	NaN	NaN	NaN	3	3
686	'>gi|127139033|ref|NP_000932.3| NADPH--cytochrome P450 reductase [Homo sapiens]'	NaN	NaN	NaN	NaN	3	NaN	NaN	NaN	3	3
687	'>gi|13124879|ref|NP_002465.1| myosin-11 isoform SM1A [Homo sapiens]'	NaN	3	NaN	NaN	NaN	NaN	NaN	NaN	3	3
688	'>gi|145587088|ref|NP_954974.2| protein FAM179A [Homo sapiens]'	NaN	NaN	NaN	NaN	3	NaN	NaN	NaN	3	3
689	'>gi|148536830|ref|NP_004027.2| adenylate cyclase type 3 [Homo sapiens]'	NaN	NaN	NaN	NaN	3	NaN	NaN	NaN	3	3
690	'>gi|150421684|ref|NP_056020.2| probable phospholipid-transporting ATPase IH isoform a [Homo sapiens]'	NaN	NaN	NaN	3	NaN	NaN	NaN	NaN	3	3
691	'>gi|15208660|ref|NP_003132.2| E3 ubiquitin-protein ligase TRIM21 [Homo sapiens]'	NaN	NaN	NaN	NaN	3	NaN	NaN	NaN	3	3
692	'>gi|153945790|ref|NP_002463.2| myosin-8 [Homo sapiens]'	NaN	3	NaN	NaN	NaN	NaN	NaN	NaN	3	3
693	'>gi|15431316|ref|NP_149034.2| keratin, type II cuticular Hb4 [Homo sapiens]'	NaN	NaN	NaN	NaN	NaN	NaN	3	NaN	3	3
694	'>gi|154354990|ref|NP_055730.2| ankyrin repeat domain-containing protein 26 isoform 1 [Homo sapiens]'	NaN	3	NaN	NaN	NaN	NaN	NaN	NaN	3	3
695	'>gi|157738667|ref|NP_078789.2| FYVE and coiled-coil domain-containing protein 1 [Homo sapiens]'	NaN	NaN	3	NaN	NaN	NaN	NaN	NaN	3	3
696	'>gi|157739864|ref|NP_001099032.1| ubiquitin conjugation factor E4 B isoform 1 [Homo sapiens]'	NaN	3	NaN	NaN	NaN	NaN	NaN	NaN	3	3
697	'>gi|16357472|ref|NP_426359.1| cell division control protein 42 homolog isoform 2 [Homo sapiens]'	NaN	NaN	NaN	NaN	NaN	3	NaN	NaN	3	3
698	'>gi|169790833|ref|NP_001116078.1| lysosome-associated membrane glycoprotein 2 isoform C precursor [Homo sapiens]'	NaN	NaN	3	NaN	NaN	NaN	NaN	NaN	3	3
699	'>gi|18201905|ref|NP_000166.2| glucose-6-phosphate isomerase isoform 2 [Homo sapiens]'	NaN	NaN	NaN	3	NaN	NaN	NaN	NaN	3	3
700	'>gi|18677729|ref|NP_570718.1| relaxin receptor 2 isoform 1 [Homo sapiens]'	NaN	NaN	NaN	NaN	3	NaN	NaN	NaN	3	3
701	'>gi|188497750|ref|NP_277035.2| hexokinase-1 isoform HKI-td [Homo sapiens]'	NaN	NaN	NaN	3	NaN	NaN	NaN	NaN	3	3
702	'>gi|190014578|ref|NP_054735.3| phosphatidylinositide phosphatase SAC1 [Homo sapiens]'	NaN	NaN	NaN	NaN	3	NaN	NaN	NaN	3	3
703	'>gi|193211614|ref|NP_001123237.1| sterol-4-alpha-carboxylate 3-dehydrogenase, decarboxylating [Homo sapiens]'	NaN	NaN	NaN	NaN	NaN	3	NaN	NaN	3	3
704	'>gi|194097350|ref|NP_001123476.1| alpha-actinin-1 isoform a [Homo sapiens]'	NaN	NaN	NaN	3	NaN	NaN	NaN	NaN	3	3
705	'>gi|195220720|ref|NP_001124181.1| protein RUFY3 isoform 3 [Homo sapiens]'	NaN	NaN	NaN	NaN	3	NaN	NaN	NaN	3	3
706	'>gi|195972881|ref|NP_001124435.1| transmembrane protein 194A isoform a [Homo sapiens]'	NaN	NaN	NaN	NaN	3	NaN	NaN	NaN	3	3
707	'>gi|20302166|ref|NP_057694.2| toll-like receptor 8 isoform 1 [Homo sapiens]'	3	NaN	NaN	NaN	NaN	NaN	NaN	NaN	3	3
708	'>gi|21166380|ref|NP_620060.1| neurexin-2-beta isoform alpha-2 precursor [Homo sapiens]'	3	NaN	NaN	NaN	NaN	NaN	NaN	NaN	3	3
709	'>gi|21327701|ref|NP_631961.1| TATA-binding protein-associated factor 2N isoform 1 [Homo sapiens]'	NaN	NaN	NaN	NaN	3	NaN	NaN	NaN	3	3
710	'>gi|21327708|ref|NP_631946.1| nucleosome assembly protein 1-like 1 [Homo sapiens]'	NaN	NaN	NaN	NaN	3	NaN	NaN	NaN	3	3
711	'>gi|21687139|ref|NP_660279.1| UDP-GlcNAc:betaGal beta-1,3-N-acetylglucosaminyltransferase 7 [Homo sapiens]'	NaN	NaN	NaN	3	NaN	NaN	NaN	NaN	3	3
712	'>gi|217272890|ref|NP_001136076.1| palmitoyl-protein thioesterase 1 isoform 2 precursor [Homo sapiens]'	NaN	NaN	NaN	NaN	NaN	3	NaN	NaN	3	3
713	'>gi|217416369|ref|NP_001136120.1| GTP-binding protein SAR1a [Homo sapiens]'	NaN	NaN	NaN	NaN	NaN	NaN	3	NaN	3	3
714	'>gi|221307584|ref|NP_001138303.1| prohibitin-2 isoform 1 [Homo sapiens]'	NaN	NaN	NaN	NaN	NaN	3	NaN	NaN	3	3
715	'>gi|226371754|ref|NP_112593.2| katanin p60 ATPase-containing subunit A-like 2 [Homo sapiens]'	NaN	NaN	NaN	3	NaN	NaN	NaN	NaN	3	3
716	'>gi|23110955|ref|NP_004381.2| pro-cathepsin H preproprotein [Homo sapiens]'	NaN	NaN	NaN	NaN	NaN	3	NaN	NaN	3	3
717	'>gi|23238188|ref|NP_690042.1| testin isoform 2 [Homo sapiens]'	NaN	NaN	NaN	NaN	3	NaN	NaN	NaN	3	3
718	'>gi|24430151|ref|NP_002793.2| 26S protease regulatory subunit 4 [Homo sapiens]'	NaN	NaN	NaN	NaN	3	NaN	NaN	NaN	3	3
719	'>gi|24432106|ref|NP_066997.3| cell cycle and apoptosis regulator protein 2 [Homo sapiens]'	NaN	NaN	NaN	3	NaN	NaN	NaN	NaN	3	3
720	'>gi|256222415|ref|NP_001157791.1| filamin-B isoform 4 [Homo sapiens]'	NaN	NaN	NaN	3	NaN	NaN	NaN	NaN	3	3
721	'>gi|281182700|ref|NP_001162578.1| WASH complex subunit FAM21C isoform 3 [Homo sapiens]'	NaN	3	NaN	NaN	NaN	NaN	NaN	NaN	3	3
722	'>gi|282165817|ref|NP_001161302.1| transmembrane emp24 domain-containing protein 5 isoform 2 precursor [Homo sapiens]'	NaN	NaN	NaN	NaN	NaN	NaN	3	NaN	3	3
723	'>gi|28872761|ref|NP_003819.1| myotubularin-related protein 1 [Homo sapiens]'	NaN	NaN	NaN	NaN	3	NaN	NaN	NaN	3	3
724	'>gi|29725609|ref|NP_005219.2| epidermal growth factor receptor isoform a precursor [Homo sapiens]'	NaN	NaN	3	NaN	NaN	NaN	NaN	NaN	3	3
725	'>gi|29789409|ref|NP_777549.1| mimitin, mitochondrial [Homo sapiens]'	NaN	NaN	NaN	NaN	NaN	NaN	3	NaN	3	3
726	'>gi|306922394|ref|NP_207646.2| zinc finger homeobox protein 2 [Homo sapiens]'	NaN	3	NaN	NaN	NaN	NaN	NaN	NaN	3	3
727	'>gi|30795193|ref|NP_848699.1| septin-10 isoform 2 [Homo sapiens]'	NaN	NaN	NaN	NaN	3	NaN	NaN	NaN	3	3
728	'>gi|311771694|ref|NP_001185722.1| ARPC4-TTLL3 fusion protein [Homo sapiens]'	NaN	NaN	NaN	NaN	NaN	NaN	3	NaN	3	3
729	'>gi|31982936|ref|NP_003892.2| sphingosine-1-phosphate lyase 1 [Homo sapiens]'	NaN	NaN	NaN	NaN	3	NaN	NaN	NaN	3	3
730	'>gi|325651952|ref|NP_001191763.1| anoctamin-10 isoform 5 [Homo sapiens]'	NaN	NaN	NaN	NaN	3	NaN	NaN	NaN	3	3
731	'>gi|32967607|ref|NP_002074.2| glutathione peroxidase 2 [Homo sapiens]'	NaN	NaN	NaN	NaN	NaN	3	NaN	NaN	3	3
732	'>gi|347659028|ref|NP_001231639.1| glutamine--fructose-6-phosphate aminotransferase [isomerizing] 1 isoform 1 [Homo sapiens]'	NaN	NaN	NaN	NaN	3	NaN	NaN	NaN	3	3
733	'>gi|371502112|ref|NP_001243064.1| exportin-2 isoform 2 [Homo sapiens]'	NaN	NaN	NaN	3	NaN	NaN	NaN	NaN	3	3
734	'>gi|387527972|ref|NP_001248341.1| dynactin subunit 2 isoform 2 [Homo sapiens]'	NaN	NaN	NaN	NaN	3	NaN	NaN	NaN	3	3
735	'>gi|389565487|ref|NP_001254487.1| programmed cell death protein 6 isoform 4 [Homo sapiens]'	NaN	NaN	NaN	NaN	NaN	NaN	NaN	3	3	3
736	'>gi|394025704|ref|NP_001257368.1| actin-related protein 2/3 complex subunit 5 isoform 2 [Homo sapiens]'	NaN	NaN	NaN	3	NaN	NaN	NaN	NaN	3	3
737	'>gi|401709935|ref|NP_001257906.1| IST1 homolog isoform d [Homo sapiens]'	NaN	NaN	NaN	NaN	3	NaN	NaN	NaN	3	3
738	'>gi|40789233|ref|NP_064708.1| ubiquinone biosynthesis protein COQ9, mitochondrial precursor [Homo sapiens]'	NaN	NaN	NaN	NaN	NaN	3	NaN	NaN	3	3
739	'>gi|40805827|ref|NP_955476.1| coatomer subunit epsilon isoform c [Homo sapiens]'	NaN	NaN	NaN	NaN	NaN	3	NaN	NaN	3	3
740	'>gi|4503519|ref|NP_003745.1| eukaryotic translation initiation factor 3 subunit F [Homo sapiens]'	NaN	NaN	NaN	NaN	3	NaN	NaN	NaN	3	3
741	'>gi|4503521|ref|NP_001559.1| eukaryotic translation initiation factor 3 subunit E [Homo sapiens]'	NaN	NaN	NaN	NaN	3	NaN	NaN	NaN	3	3
742	'>gi|4503937|ref|NP_001474.1| protein NipSnap homolog 2 isoform 1 [Homo sapiens]'	NaN	NaN	NaN	NaN	NaN	NaN	3	NaN	3	3
743	'>gi|4504253|ref|NP_002096.1| histone H2AX [Homo sapiens]'	NaN	NaN	NaN	NaN	NaN	NaN	3	NaN	3	3
744	'>gi|4504279|ref|NP_002098.1| histone H3.3 [Homo sapiens]'	NaN	NaN	NaN	3	NaN	NaN	NaN	NaN	3	3
745	'>gi|4504935|ref|NP_002274.1| keratin, type II cuticular Hb5 isoform 1 [Homo sapiens]'	NaN	3	NaN	NaN	NaN	NaN	NaN	NaN	3	3
746	'>gi|4505357|ref|NP_002480.1| NADH dehydrogenase [ubiquinone] 1 alpha subcomplex subunit 4 [Homo sapiens]'	NaN	NaN	NaN	NaN	NaN	NaN	NaN	3	3	3
747	'>gi|4506667|ref|NP_000993.1| 60S acidic ribosomal protein P0 [Homo sapiens]'	NaN	NaN	NaN	NaN	NaN	3	NaN	NaN	3	3
748	'>gi|4507943|ref|NP_003391.1| exportin-1 [Homo sapiens]'	NaN	NaN	NaN	3	NaN	NaN	NaN	NaN	3	3
749	'>gi|47086907|ref|NP_060309.2| lysophosphatidylcholine acyltransferase 2 [Homo sapiens]'	NaN	NaN	NaN	NaN	3	NaN	NaN	NaN	3	3
750	'>gi|4757818|ref|NP_004879.1| V-type proton ATPase subunit G 1 [Homo sapiens]'	NaN	NaN	NaN	NaN	NaN	NaN	NaN	3	3	3
751	'>gi|4809279|ref|NP_004025.1| annexin A7 isoform 2 [Homo sapiens]'	NaN	NaN	NaN	NaN	3	NaN	NaN	NaN	3	3
752	'>gi|48255937|ref|NP_001001389.1| CD44 antigen isoform 2 precursor [Homo sapiens]'	NaN	NaN	3	NaN	NaN	NaN	NaN	NaN	3	3
753	'>gi|48526509|ref|NP_001001563.1| mitochondrial import inner membrane translocase subunit TIM50 [Homo sapiens]'	NaN	NaN	NaN	NaN	NaN	3	NaN	NaN	3	3
754	'>gi|530375097|ref|XP_005247745.1| PREDICTED: ras GTPase-activating protein 2 isoform X2 [Homo sapiens]'	NaN	NaN	NaN	3	NaN	NaN	NaN	NaN	3	3
755	'>gi|530399159|ref|XP_005253433.1| PREDICTED: cation-dependent mannose-6-phosphate receptor isoform X1 [Homo sapiens]'	NaN	NaN	NaN	NaN	3	NaN	NaN	NaN	3	3
756	'>gi|530401608|ref|XP_005253601.1| PREDICTED: transmembrane emp24 domain-containing protein 2 isoform X1 [Homo sapiens]'	NaN	NaN	NaN	NaN	NaN	3	NaN	NaN	3	3
757	'>gi|530401786|ref|XP_005253685.1| PREDICTED: huntingtin-interacting protein 1-related protein isoform X2 [Homo sapiens]'	NaN	NaN	NaN	3	NaN	NaN	NaN	NaN	3	3
758	'>gi|530405858|ref|XP_005254442.1| PREDICTED: microtubule-associated protein 1A isoform X1 [Homo sapiens]'	NaN	3	NaN	NaN	NaN	NaN	NaN	NaN	3	3
759	'>gi|530406402|ref|XP_005254702.1| PREDICTED: tropomyosin alpha-1 chain isoform X10 [Homo sapiens]'	NaN	NaN	NaN	NaN	NaN	3	NaN	NaN	3	3
760	'>gi|530413107|ref|XP_005257850.1| PREDICTED: synaptogyrin-2 isoform X2 [Homo sapiens]'	NaN	NaN	NaN	NaN	NaN	NaN	3	NaN	3	3
761	'>gi|530415128|ref|XP_005260099.1| PREDICTED: tropomyosin alpha-4 chain isoform X1 [Homo sapiens]'	NaN	NaN	NaN	3	NaN	NaN	NaN	NaN	3	3
762	'>gi|54112390|ref|NP_000713.2| voltage-dependent calcium channel subunit alpha-2/delta-1 precursor [Homo sapiens]'	NaN	NaN	3	NaN	NaN	NaN	NaN	NaN	3	3
763	'>gi|544186046|ref|NP_001269634.1| protein disulfide-isomerase A6 isoform b [Homo sapiens]'	NaN	NaN	NaN	3	NaN	NaN	NaN	NaN	3	3
764	'>gi|544711041|ref|NP_001269836.1| T-complex protein 1 subunit theta isoform 2 [Homo sapiens]'	NaN	NaN	NaN	3	NaN	NaN	NaN	NaN	3	3
765	'>gi|545478466|ref|NP_001269901.1| septin-2 isoform b [Homo sapiens]'	NaN	NaN	NaN	NaN	NaN	3	NaN	NaN	3	3
766	'>gi|557440899|ref|NP_001273490.1| nuclear mitotic apparatus protein 1 isoform 2 [Homo sapiens]'	NaN	NaN	NaN	NaN	NaN	3	NaN	NaN	3	3
767	'>gi|55956788|ref|NP_005372.2| nucleolin [Homo sapiens]'	NaN	NaN	NaN	3	NaN	NaN	NaN	NaN	3	3
768	'>gi|56549125|ref|NP_001005362.1| dynamin-2 isoform 4 [Homo sapiens]'	NaN	NaN	NaN	3	NaN	NaN	NaN	NaN	3	3
769	'>gi|578801661|ref|XP_006711667.1| PREDICTED: ras-related protein Rab-7L1 isoform X6 [Homo sapiens]'	NaN	NaN	NaN	NaN	NaN	NaN	3	NaN	3	3
770	'>gi|578804293|ref|XP_006712576.1| PREDICTED: integrin alpha-V isoform X2 [Homo sapiens]'	NaN	NaN	3	NaN	NaN	NaN	NaN	NaN	3	3
771	'>gi|578806691|ref|XP_006713443.1| PREDICTED: protein bassoon isoform X1 [Homo sapiens]'	NaN	NaN	3	NaN	NaN	NaN	NaN	NaN	3	3
772	'>gi|5802966|ref|NP_006861.1| destrin isoform a [Homo sapiens]'	NaN	NaN	NaN	NaN	NaN	NaN	3	NaN	3	3
773	'>gi|5803040|ref|NP_006849.1| transmembrane emp24 domain-containing protein 1 precursor [Homo sapiens]'	NaN	NaN	NaN	NaN	NaN	3	NaN	NaN	3	3
774	'>gi|594140512|ref|NP_001277241.1| catenin alpha-1 isoform 5 [Homo sapiens]'	NaN	NaN	NaN	3	NaN	NaN	NaN	NaN	3	3
775	'>gi|6005884|ref|NP_009038.1| translocon-associated protein subunit gamma [Homo sapiens]'	NaN	NaN	NaN	NaN	NaN	NaN	3	NaN	3	3
776	'>gi|61966763|ref|NP_001013680.1| pentraxin-4 [Homo sapiens]'	NaN	NaN	NaN	NaN	NaN	NaN	NaN	3	3	3
777	'>gi|63003894|ref|NP_612502.1| coiled-coil domain-containing protein 167 [Homo sapiens]'	NaN	NaN	NaN	NaN	NaN	NaN	3	NaN	3	3
778	'>gi|645912975|ref|NP_001280143.1| tubulin beta chain isoform d [Homo sapiens]'	NaN	NaN	NaN	NaN	3	NaN	NaN	NaN	3	3
779	'>gi|662236841|ref|NP_001284538.1| mitogen-activated protein kinase kinase kinase 6 isoform 2 [Homo sapiens]'	NaN	NaN	3	NaN	NaN	NaN	NaN	NaN	3	3
780	'>gi|7106299|ref|NP_037368.1| ataxin-10 isoform 1 [Homo sapiens]'	NaN	NaN	NaN	NaN	3	NaN	NaN	NaN	3	3
781	'>gi|74099697|ref|NP_001027565.1| heterogeneous nuclear ribonucleoprotein H2 [Homo sapiens]'	NaN	NaN	NaN	NaN	3	NaN	NaN	NaN	3	3
782	'>gi|7657015|ref|NP_055121.1| tRNA-splicing ligase RtcB homolog [Homo sapiens]'	NaN	NaN	NaN	NaN	3	NaN	NaN	NaN	3	3
783	'>gi|88758603|ref|NP_001034673.1| PRKCA-binding protein [Homo sapiens]'	NaN	NaN	NaN	NaN	3	NaN	NaN	NaN	3	3
784	'>sp|K1C10_HUMAN|(Common contaminant protein)'	NaN	NaN	NaN	NaN	NaN	NaN	NaN	3	3	3
785	'>gi|297374821|ref|NP_001172026.1| insulin preproprotein [Homo sapiens]'	1	NaN	2	2	NaN	2	1	2	2	10
786	'>Reverse >gi|187169264|ref|NP_001119601.1| DNA replication complex GINS protein PSF3 isoform a [Homo sapiens]'	NaN	2	NaN	NaN	2	2	NaN	2	2	8
787	'>gi|189409122|ref|NP_690005.2| retroviral-like aspartic protease 1 precursor [Homo sapiens]'	1	NaN	NaN	1	NaN	2	2	2	2	8
788	'>gi|16418361|ref|NP_443091.1| protein RFT1 homolog [Homo sapiens]'	1	NaN	2	NaN	1	1	NaN	NaN	2	5
789	'>gi|170296790|ref|NP_031369.2| trypsin-3 isoform 1 preproprotein [Homo sapiens]'	NaN	1	2	1	1	NaN	NaN	NaN	2	5
790	'>gi|23110944|ref|NP_002782.1| proteasome subunit alpha type-6 isoform a [Homo sapiens]'	1	NaN	NaN	NaN	2	1	1	NaN	2	5
791	'>gi|394953893|ref|NP_001257410.1| proteasome subunit beta type-6 isoform 2 proprotein [Homo sapiens]'	2	NaN	NaN	2	NaN	1	NaN	NaN	2	5
792	'>gi|5453597|ref|NP_006126.1| F-actin-capping protein subunit alpha-1 [Homo sapiens]'	NaN	NaN	NaN	2	1	2	NaN	NaN	2	5
793	'>gi|96975097|ref|NP_057661.3| ras-related protein Rab-6B [Homo sapiens]'	NaN	NaN	NaN	NaN	2	2	NaN	1	2	5
794	'>Reverse >gi|145312241|ref|NP_071330.3| differentially expressed in FDCP 6 homolog [Homo sapiens]'	NaN	NaN	NaN	NaN	1	NaN	1	2	2	4
795	'>gi|13129092|ref|NP_076997.1| transmembrane protein 109 precursor [Homo sapiens]'	NaN	NaN	NaN	NaN	NaN	NaN	2	2	2	4
796	'>gi|146198640|ref|NP_077283.2| glycerophosphodiester phosphodiesterase domain-containing protein 3 [Homo sapiens]'	NaN	NaN	NaN	NaN	1	2	1	NaN	2	4
797	'>gi|155722983|ref|NP_057376.2| heat shock protein 75 kDa, mitochondrial isoform 1 precursor [Homo sapiens]'	NaN	NaN	1	2	1	NaN	NaN	NaN	2	4
798	'>gi|24234699|ref|NP_002267.2| keratin, type I cytoskeletal 19 [Homo sapiens]'	1	NaN	NaN	2	1	NaN	NaN	NaN	2	4
799	'>gi|258613943|ref|NP_001158222.1| aspartyl/asparaginyl beta-hydroxylase isoform f [Homo sapiens]'	NaN	NaN	2	NaN	NaN	2	NaN	NaN	2	4
800	'>gi|312596881|ref|NP_001186092.1| 26S protease regulatory subunit 8 isoform 2 [Homo sapiens]'	NaN	NaN	NaN	2	2	NaN	NaN	NaN	2	4
801	'>gi|387912532|ref|NP_001248760.1| serpin B7 isoform 2 [Homo sapiens]'	2	NaN	1	NaN	NaN	NaN	1	NaN	2	4
802	'>gi|42491362|ref|NP_963906.1| inhibitor of nuclear factor kappa-B kinase-interacting protein isoform 2 [Homo sapiens]'	NaN	NaN	NaN	NaN	2	2	NaN	NaN	2	4
803	'>gi|4502285|ref|NP_001672.1| sarcoplasmic/endoplasmic reticulum calcium ATPase 2 isoform a [Homo sapiens]'	NaN	NaN	NaN	2	2	NaN	NaN	NaN	2	4
804	'>gi|4506181|ref|NP_002778.1| proteasome subunit alpha type-2 [Homo sapiens]'	NaN	NaN	NaN	NaN	2	NaN	2	NaN	2	4
805	'>Reverse >gi|530377710|ref|XP_005263061.1| PREDICTED: ecto-ADP-ribosyltransferase 3 isoform X10 [Homo sapiens]'	NaN	NaN	NaN	1	NaN	NaN	NaN	2	2	3
806	'>gi|10863935|ref|NP_066959.1| reticulon-1 isoform A [Homo sapiens]'	NaN	NaN	NaN	NaN	NaN	NaN	1	2	2	3
807	'>gi|153252081|ref|NP_115961.2| ribonuclease 7 precursor [Homo sapiens]'	2	NaN	NaN	NaN	NaN	NaN	1	NaN	2	3
808	'>gi|21361144|ref|NP_002795.2| 26S protease regulatory subunit 6A [Homo sapiens]'	NaN	NaN	NaN	1	2	NaN	NaN	NaN	2	3
809	'>gi|258613953|ref|NP_001158226.1| aspartyl/asparaginyl beta-hydroxylase isoform j [Homo sapiens]'	NaN	NaN	NaN	NaN	2	NaN	1	NaN	2	3
810	'>gi|27894302|ref|NP_775297.1| interleukin-37 isoform 5 [Homo sapiens]'	1	NaN	NaN	NaN	NaN	NaN	2	NaN	2	3
811	'>gi|410991931|ref|NP_001258610.1| pyrroline-5-carboxylate reductase 2 isoform 2 [Homo sapiens]'	NaN	NaN	NaN	NaN	NaN	2	1	NaN	2	3
812	'>gi|4502163|ref|NP_001638.1| apolipoprotein D precursor [Homo sapiens]'	1	NaN	NaN	NaN	NaN	NaN	2	NaN	2	3
813	'>gi|4506447|ref|NP_002888.1| RNA-binding motif, single-stranded-interacting protein 1 isoform c [Homo sapiens]'	NaN	NaN	NaN	NaN	2	1	NaN	NaN	2	3
814	'>gi|4506695|ref|NP_001013.1| 40S ribosomal protein S19 [Homo sapiens]'	NaN	NaN	NaN	2	NaN	NaN	1	NaN	2	3
815	'>gi|5031571|ref|NP_005713.1| actin-related protein 2 isoform b [Homo sapiens]'	NaN	NaN	NaN	2	NaN	1	NaN	NaN	2	3
816	'>gi|526252794|ref|NP_001268230.1| kinesin-like protein KIF23 isoform 3 [Homo sapiens]'	NaN	NaN	1	NaN	NaN	NaN	NaN	2	2	3
817	'>gi|53729344|ref|NP_001005337.1| plakophilin-1 isoform 1a [Homo sapiens]'	NaN	NaN	NaN	NaN	1	2	NaN	NaN	2	3
818	'>gi|58530848|ref|NP_001011546.1| destrin isoform b [Homo sapiens]'	NaN	NaN	NaN	2	NaN	NaN	NaN	1	2	3
819	'>Reverse >gi|116235480|ref|NP_149118.2| protein transport protein Sec16B [Homo sapiens]'	2	NaN	NaN	NaN	NaN	NaN	NaN	NaN	2	2
820	'>Reverse >gi|118600977|ref|NP_056507.2| C3 and PZP-like alpha-2-macroglobulin domain-containing protein 8 [Homo sapiens]'	NaN	NaN	NaN	2	NaN	NaN	NaN	NaN	2	2
821	'>Reverse >gi|14249704|ref|NP_116307.1| ras-related and estrogen-regulated growth inhibitor isoform 1 [Homo sapiens]'	NaN	NaN	NaN	NaN	2	NaN	NaN	NaN	2	2
822	'>Reverse >gi|156119615|ref|NP_008832.2| unconventional myosin-IXa [Homo sapiens]'	2	NaN	NaN	NaN	NaN	NaN	NaN	NaN	2	2
823	'>Reverse >gi|19923667|ref|NP_542388.2| radical S-adenosyl methionine domain-containing protein 2 [Homo sapiens]'	NaN	2	NaN	NaN	NaN	NaN	NaN	NaN	2	2
824	'>Reverse >gi|20070264|ref|NP_056516.2| endoplasmic reticulum lectin 1 isoform 1 precursor [Homo sapiens]'	NaN	NaN	NaN	NaN	NaN	2	NaN	NaN	2	2
825	'>Reverse >gi|221218991|ref|NP_001137461.1| neuroblastoma breakpoint family member 4 [Homo sapiens]'	NaN	NaN	NaN	2	NaN	NaN	NaN	NaN	2	2
826	'>Reverse >gi|224493847|ref|NP_001139013.1| T-complex protein 11-like protein 1 [Homo sapiens]'	NaN	NaN	NaN	2	NaN	NaN	NaN	NaN	2	2
827	'>Reverse >gi|226371750|ref|NP_073741.2| speckle targeted PIP5K1A-regulated poly(A) polymerase [Homo sapiens]'	NaN	NaN	NaN	2	NaN	NaN	NaN	NaN	2	2
828	'>Reverse >gi|314122233|ref|NP_001186627.1| large proline-rich protein BAG6 isoform d [Homo sapiens]'	2	NaN	NaN	NaN	NaN	NaN	NaN	NaN	2	2
829	'>Reverse >gi|4502443|ref|NP_001714.1| dystonin isoform 1e precursor [Homo sapiens]'	NaN	NaN	2	NaN	NaN	NaN	NaN	NaN	2	2
830	'>Reverse >gi|4502901|ref|NP_001825.1| clathrin light chain B isoform a [Homo sapiens]'	NaN	NaN	NaN	NaN	NaN	2	NaN	NaN	2	2
831	'>Reverse >gi|4504811|ref|NP_002221.1| junction plakoglobin [Homo sapiens]'	NaN	NaN	NaN	NaN	2	NaN	NaN	NaN	2	2
832	'>Reverse >gi|55749544|ref|NP_055446.2| SH3 and PX domain-containing protein 2A [Homo sapiens]'	NaN	NaN	NaN	NaN	2	NaN	NaN	NaN	2	2
833	'>Reverse >gi|5730009|ref|NP_006501.1| zinc finger protein RFP [Homo sapiens]'	NaN	2	NaN	NaN	NaN	NaN	NaN	NaN	2	2
834	'>Reverse >gi|578800751|ref|XP_006711309.1| PREDICTED: SLIT-ROBO Rho GTPase-activating protein 2 isoform X7 [Homo sapiens]'	2	NaN	NaN	NaN	NaN	NaN	NaN	NaN	2	2
835	'>Reverse >gi|578822447|ref|XP_006718995.1| PREDICTED: centrosomal protein KIAA1731 isoform X7 [Homo sapiens]'	NaN	NaN	NaN	2	NaN	NaN	NaN	NaN	2	2
836	'>Reverse >gi|602617433|ref|NP_116271.3| paraneoplastic antigen-like protein 6A [Homo sapiens]'	NaN	NaN	2	NaN	NaN	NaN	NaN	NaN	2	2
837	'>Reverse >gi|62241003|ref|NP_705838.3| cardiomyopathy-associated protein 5 [Homo sapiens]'	NaN	NaN	NaN	NaN	2	NaN	NaN	NaN	2	2
838	'>gi|10835063|ref|NP_002511.1| nucleophosmin isoform 1 [Homo sapiens]'	NaN	NaN	NaN	2	NaN	NaN	NaN	NaN	2	2
839	'>gi|10835256|ref|NP_037390.2| apoptosis-associated speck-like protein containing a CARD isoform a [Homo sapiens]'	NaN	NaN	NaN	2	NaN	NaN	NaN	NaN	2	2
840	'>gi|110681719|ref|NP_114401.2| transmembrane protein 245 [Homo sapiens]'	NaN	NaN	NaN	NaN	2	NaN	NaN	NaN	2	2
841	'>gi|11321575|ref|NP_003686.1| lymphocyte antigen 6D precursor [Homo sapiens]'	NaN	NaN	NaN	2	NaN	NaN	NaN	NaN	2	2
842	'>gi|115334682|ref|NP_079524.2| SRC kinase signaling inhibitor 1 [Homo sapiens]'	NaN	NaN	2	NaN	NaN	NaN	NaN	NaN	2	2
843	'>gi|116517313|ref|NP_004861.2| mannose-P-dolichol utilization defect 1 protein [Homo sapiens]'	NaN	NaN	NaN	NaN	NaN	NaN	2	NaN	2	2
844	'>gi|117422433|ref|NP_001070968.1| kallikrein-10 preproprotein [Homo sapiens]'	2	NaN	NaN	NaN	NaN	NaN	NaN	NaN	2	2
845	'>gi|122939155|ref|NP_036475.3| NAD(P) transhydrogenase, mitochondrial [Homo sapiens]'	NaN	NaN	NaN	2	NaN	NaN	NaN	NaN	2	2
846	'>gi|124494254|ref|NP_006182.2| proliferation-associated protein 2G4 [Homo sapiens]'	NaN	NaN	NaN	2	NaN	NaN	NaN	NaN	2	2
847	'>gi|126012562|ref|NP_002323.2| prolow-density lipoprotein receptor-related protein 1 precursor [Homo sapiens]'	NaN	NaN	2	NaN	NaN	NaN	NaN	NaN	2	2
848	'>gi|13027648|ref|NP_073718.1| small nuclear ribonucleoprotein-associated protein N [Homo sapiens]'	NaN	NaN	NaN	NaN	NaN	NaN	2	NaN	2	2
849	'>gi|13489087|ref|NP_109591.1| leukocyte elastase inhibitor [Homo sapiens]'	NaN	NaN	NaN	NaN	NaN	2	NaN	NaN	2	2
850	'>gi|14043072|ref|NP_112533.1| heterogeneous nuclear ribonucleoproteins A2/B1 isoform B1 [Homo sapiens]'	NaN	NaN	NaN	2	NaN	NaN	NaN	NaN	2	2
851	'>gi|140972063|ref|NP_115984.3| neurabin-2 [Homo sapiens]'	NaN	NaN	NaN	2	NaN	NaN	NaN	NaN	2	2
852	'>gi|14110420|ref|NP_112738.1| heterogeneous nuclear ribonucleoprotein D0 isoform a [Homo sapiens]'	NaN	NaN	NaN	NaN	2	NaN	NaN	NaN	2	2
853	'>gi|14196462|ref|NP_114398.1| protocadherin gamma-A2 isoform 2 precursor [Homo sapiens]'	NaN	NaN	NaN	NaN	2	NaN	NaN	NaN	2	2
854	'>gi|142976675|ref|NP_055389.3| striatin-3 isoform 2 [Homo sapiens]'	NaN	NaN	NaN	2	NaN	NaN	NaN	NaN	2	2
855	'>gi|148298677|ref|NP_001091742.1| hydroxymethylglutaryl-CoA synthase, cytoplasmic [Homo sapiens]'	NaN	NaN	NaN	2	NaN	NaN	NaN	NaN	2	2
856	'>gi|15187164|ref|NP_150593.1| extracellular glycoprotein lacritin precursor [Homo sapiens]'	2	NaN	NaN	NaN	NaN	NaN	NaN	NaN	2	2
857	'>gi|153070260|ref|NP_002347.5| myristoylated alanine-rich C-kinase substrate [Homo sapiens]'	NaN	NaN	NaN	NaN	2	NaN	NaN	NaN	2	2
858	'>gi|155969697|ref|NP_775109.2| keratin, type II cytoskeletal 6C [Homo sapiens]'	NaN	NaN	NaN	NaN	NaN	NaN	NaN	2	2	2
859	'>gi|156415990|ref|NP_057066.2| Y-box-binding protein 2 [Homo sapiens]'	NaN	NaN	NaN	NaN	NaN	NaN	2	NaN	2	2
860	'>gi|156631005|ref|NP_002803.2| 26S proteasome non-ATPase regulatory subunit 8 [Homo sapiens]'	NaN	NaN	NaN	NaN	NaN	2	NaN	NaN	2	2
861	'>gi|157412270|ref|NP_112480.2| heterogeneous nuclear ribonucleoprotein M isoform b [Homo sapiens]'	NaN	NaN	NaN	2	NaN	NaN	NaN	NaN	2	2
862	'>gi|157739936|ref|NP_078964.2| uncharacterized protein C10orf68 isoform b [Homo sapiens]'	NaN	NaN	2	NaN	NaN	NaN	NaN	NaN	2	2
863	'>gi|16418397|ref|NP_443118.1| protein MAL2 [Homo sapiens]'	NaN	NaN	NaN	NaN	NaN	NaN	2	NaN	2	2
864	'>gi|16445419|ref|NP_005689.2| secretory carrier-associated membrane protein 3 isoform 1 [Homo sapiens]'	NaN	NaN	NaN	NaN	NaN	2	NaN	NaN	2	2
865	'>gi|171460922|ref|NP_597705.2| transmembrane protein 132D precursor [Homo sapiens]'	NaN	NaN	NaN	2	NaN	NaN	NaN	NaN	2	2
866	'>gi|189217863|ref|NP_612638.3| histidine triad nucleotide-binding protein 3 [Homo sapiens]'	NaN	NaN	NaN	NaN	NaN	NaN	2	NaN	2	2
867	'>gi|19923142|ref|NP_002256.2| importin subunit beta-1 isoform 1 [Homo sapiens]'	NaN	NaN	NaN	2	NaN	NaN	NaN	NaN	2	2
868	'>gi|20149560|ref|NP_004595.2| syntaxin-4 isoform 3 [Homo sapiens]'	NaN	NaN	NaN	NaN	NaN	2	NaN	NaN	2	2
869	'>gi|20336335|ref|NP_612815.1| bcl-2-like protein 1 isoform 1 [Homo sapiens]'	NaN	NaN	NaN	NaN	NaN	NaN	2	NaN	2	2
870	'>gi|20357556|ref|NP_612632.1| src substrate cortactin isoform b [Homo sapiens]'	NaN	NaN	NaN	2	NaN	NaN	NaN	NaN	2	2
871	'>gi|21361794|ref|NP_060918.2| cullin-associated NEDD8-dissociated protein 1 [Homo sapiens]'	NaN	NaN	2	NaN	NaN	NaN	NaN	NaN	2	2
872	'>gi|219803769|ref|NP_001137324.1| trichoplein keratin filament-binding protein [Homo sapiens]'	NaN	NaN	NaN	NaN	NaN	2	NaN	NaN	2	2
873	'>gi|22095331|ref|NP_055862.1| ER membrane protein complex subunit 1 isoform 1 precursor [Homo sapiens]'	NaN	NaN	NaN	2	NaN	NaN	NaN	NaN	2	2
874	'>gi|221307568|ref|NP_001138295.1| C-myc promoter-binding protein isoform 1 [Homo sapiens]'	2	NaN	NaN	NaN	NaN	NaN	NaN	NaN	2	2
875	'>gi|222144319|ref|NP_001138415.1| ras-related protein Rab-34 isoform 5 [Homo sapiens]'	NaN	NaN	NaN	NaN	NaN	NaN	2	NaN	2	2
876	'>gi|22218339|ref|NP_671722.1| protein FAM110B [Homo sapiens]'	NaN	NaN	NaN	2	NaN	NaN	NaN	NaN	2	2
877	'>gi|223468663|ref|NP_064695.3| aldo-keto reductase family 1 member B10 [Homo sapiens]'	NaN	NaN	NaN	NaN	NaN	NaN	NaN	2	2	2
878	'>gi|22749211|ref|NP_689801.1| transmembrane and TPR repeat-containing protein 2 precursor [Homo sapiens]'	2	NaN	NaN	NaN	NaN	NaN	NaN	NaN	2	2
879	'>gi|23238211|ref|NP_690601.1| actin-related protein 2/3 complex subunit 2 [Homo sapiens]'	NaN	NaN	NaN	NaN	NaN	2	NaN	NaN	2	2
880	'>gi|238624149|ref|NP_001154836.1| neuroplastin isoform d precursor [Homo sapiens]'	NaN	NaN	NaN	NaN	2	NaN	NaN	NaN	2	2
881	'>gi|24430155|ref|NP_694546.1| 26S protease regulatory subunit 6B isoform 2 [Homo sapiens]'	NaN	NaN	NaN	NaN	2	NaN	NaN	NaN	2	2
882	'>gi|253970504|ref|NP_001156758.1| RNA-binding protein EWS isoform 4 [Homo sapiens]'	NaN	NaN	NaN	2	NaN	NaN	NaN	NaN	2	2
883	'>gi|255918129|ref|NP_149977.2| lipase maturation factor 2 [Homo sapiens]'	NaN	NaN	NaN	NaN	2	NaN	NaN	NaN	2	2
884	'>gi|261399877|ref|NP_001159757.1| T-complex protein 1 subunit eta isoform d [Homo sapiens]'	NaN	NaN	NaN	NaN	2	NaN	NaN	NaN	2	2
885	'>gi|281182404|ref|NP_060830.2| gamma-taxilin isoform 1 [Homo sapiens]'	NaN	NaN	NaN	2	NaN	NaN	NaN	NaN	2	2
886	'>gi|28395033|ref|NP_786886.1| rho-related GTP-binding protein RhoC precursor [Homo sapiens]'	NaN	NaN	NaN	NaN	NaN	NaN	2	NaN	2	2
887	'>gi|285002231|ref|NP_001076581.2| glycerol-3-phosphate dehydrogenase, mitochondrial precursor [Homo sapiens]'	NaN	NaN	NaN	NaN	2	NaN	NaN	NaN	2	2
888	'>gi|297139728|ref|NP_001171922.1| RING finger protein 17 isoform 2 [Homo sapiens]'	NaN	NaN	2	NaN	NaN	NaN	NaN	NaN	2	2
889	'>gi|331284170|ref|NP_001193580.1| endophilin-B1 isoform 2 [Homo sapiens]'	NaN	NaN	NaN	NaN	NaN	2	NaN	NaN	2	2
890	'>gi|332801073|ref|NP_001193925.1| protein phosphatase 2, regulatory subunit B, gamma isoform d [Homo sapiens]'	NaN	NaN	NaN	NaN	2	NaN	NaN	NaN	2	2
891	'>gi|333033787|ref|NP_001106674.2| nascent polypeptide-associated complex subunit alpha isoform a [Homo sapiens]'	NaN	NaN	NaN	2	NaN	NaN	NaN	NaN	2	2
892	'>gi|343887344|ref|NP_001230574.1| cofilin-2 isoform 2 [Homo sapiens]'	NaN	NaN	NaN	NaN	NaN	2	NaN	NaN	2	2
893	'>gi|34740329|ref|NP_919223.1| heterogeneous nuclear ribonucleoprotein A3 [Homo sapiens]'	NaN	NaN	NaN	NaN	NaN	2	NaN	NaN	2	2
894	'>gi|37594464|ref|NP_054861.2| ADP-sugar pyrophosphatase [Homo sapiens]'	NaN	NaN	NaN	2	NaN	NaN	NaN	NaN	2	2
895	'>gi|38176151|ref|NP_085153.1| protein lunapark [Homo sapiens]'	NaN	NaN	NaN	NaN	2	NaN	NaN	NaN	2	2
896	'>gi|384475517|ref|NP_001244955.1| triosephosphate isomerase isoform 3 [Homo sapiens]'	NaN	NaN	NaN	NaN	2	NaN	NaN	NaN	2	2
897	'>gi|38683836|ref|NP_942088.1| leukocyte surface antigen CD47 isoform 2 precursor [Homo sapiens]'	NaN	NaN	NaN	NaN	2	NaN	NaN	NaN	2	2
898	'>gi|389565509|ref|NP_001254500.1| TBC1 domain family member 2A isoform 1 [Homo sapiens]'	NaN	NaN	NaN	2	NaN	NaN	NaN	NaN	2	2
899	'>gi|391353390|ref|NP_001254651.1| signal recognition particle subunit SRP72 isoform 2 [Homo sapiens]'	NaN	NaN	NaN	NaN	2	NaN	NaN	NaN	2	2
900	'>gi|39930371|ref|NP_059986.1| ras-related protein Rab-39A [Homo sapiens]'	NaN	NaN	NaN	2	NaN	NaN	NaN	NaN	2	2
901	'>gi|401461775|ref|NP_001257823.1| trafficking protein particle complex subunit 3 isoform 2 [Homo sapiens]'	NaN	NaN	NaN	NaN	NaN	NaN	2	NaN	2	2
902	'>gi|402691666|ref|NP_001257962.1| enhancer of filamentation 1 isoform 4 [Homo sapiens]'	NaN	NaN	NaN	NaN	2	NaN	NaN	NaN	2	2
903	'>gi|42716280|ref|NP_976221.1| vigilin isoform a [Homo sapiens]'	NaN	NaN	2	NaN	NaN	NaN	NaN	NaN	2	2
904	'>gi|42734503|ref|NP_976240.1| caprin-1 isoform 2 [Homo sapiens]'	NaN	NaN	NaN	2	NaN	NaN	NaN	NaN	2	2
905	'>gi|4501993|ref|NP_003650.1| alkyldihydroxyacetonephosphate synthase, peroxisomal precursor [Homo sapiens]'	NaN	NaN	NaN	NaN	2	NaN	NaN	NaN	2	2
906	'>gi|4502105|ref|NP_001144.1| annexin A4 [Homo sapiens]'	NaN	NaN	NaN	2	NaN	NaN	NaN	NaN	2	2
907	'>gi|4502211|ref|NP_001654.1| ADP-ribosylation factor 6 [Homo sapiens]'	NaN	NaN	NaN	NaN	NaN	NaN	2	NaN	2	2
908	'>gi|4502303|ref|NP_001688.1| ATP synthase subunit O, mitochondrial precursor [Homo sapiens]'	NaN	NaN	NaN	NaN	NaN	NaN	2	NaN	2	2
909	'>gi|4503131|ref|NP_001895.1| catenin beta-1 [Homo sapiens]'	NaN	NaN	NaN	2	NaN	NaN	NaN	NaN	2	2
910	'>gi|4504349|ref|NP_000509.1| hemoglobin subunit beta [Homo sapiens]'	NaN	NaN	NaN	2	NaN	NaN	NaN	NaN	2	2
911	'>gi|4505467|ref|NP_002517.1| 5''-nucleotidase isoform 1 preproprotein [Homo sapiens]'	NaN	NaN	NaN	NaN	2	NaN	NaN	NaN	2	2
912	'>gi|4506381|ref|NP_002863.1| ras-related C3 botulinum toxin substrate 2 [Homo sapiens]'	NaN	NaN	NaN	NaN	NaN	NaN	NaN	2	2	2
913	'>gi|4506669|ref|NP_000994.1| 60S acidic ribosomal protein P1 isoform 1 [Homo sapiens]'	NaN	NaN	NaN	2	NaN	NaN	NaN	NaN	2	2
914	'>gi|45387945|ref|NP_065779.1| extended synaptotagmin-2 [Homo sapiens]'	NaN	NaN	NaN	2	NaN	NaN	NaN	NaN	2	2
915	'>gi|4557395|ref|NP_000058.1| carbonic anhydrase 2 isoform 1 [Homo sapiens]'	NaN	NaN	NaN	NaN	NaN	NaN	2	NaN	2	2
916	'>gi|4557541|ref|NP_000104.1| torsin-1A precursor [Homo sapiens]'	NaN	NaN	NaN	NaN	NaN	2	NaN	NaN	2	2
917	'>gi|45827734|ref|NP_005978.2| cornifin-A [Homo sapiens]'	NaN	NaN	NaN	NaN	2	NaN	NaN	NaN	2	2
918	'>gi|4757766|ref|NP_004299.1| rho GTPase-activating protein 1 [Homo sapiens]'	NaN	NaN	NaN	NaN	2	NaN	NaN	NaN	2	2
919	'>gi|4757834|ref|NP_004273.1| BAG family molecular chaperone regulator 2 [Homo sapiens]'	NaN	NaN	NaN	NaN	NaN	NaN	2	NaN	2	2
920	'>gi|4758138|ref|NP_004387.1| probable ATP-dependent RNA helicase DDX5 [Homo sapiens]'	NaN	NaN	NaN	NaN	2	NaN	NaN	NaN	2	2
921	'>gi|4758304|ref|NP_004902.1| protein disulfide-isomerase A4 precursor [Homo sapiens]'	NaN	NaN	NaN	2	NaN	NaN	NaN	NaN	2	2
922	'>gi|4758332|ref|NP_004449.1| long-chain-fatty-acid--CoA ligase 4 isoform 1 [Homo sapiens]'	NaN	NaN	NaN	NaN	2	NaN	NaN	NaN	2	2
923	'>gi|4758638|ref|NP_004896.1| peroxiredoxin-6 [Homo sapiens]'	NaN	NaN	NaN	NaN	NaN	NaN	NaN	2	2	2
924	'>gi|48255959|ref|NP_001001396.1| plasma membrane calcium-transporting ATPase 4 isoform 4a [Homo sapiens]'	NaN	NaN	NaN	2	NaN	NaN	NaN	NaN	2	2
925	'>gi|4826998|ref|NP_005057.1| splicing factor, proline- and glutamine-rich [Homo sapiens]'	NaN	NaN	NaN	2	NaN	NaN	NaN	NaN	2	2
926	'>gi|5032179|ref|NP_005753.1| transcription intermediary factor 1-beta [Homo sapiens]'	NaN	NaN	NaN	NaN	NaN	NaN	NaN	2	2	2
927	'>gi|50345991|ref|NP_001001975.1| ATP synthase subunit delta, mitochondrial precursor [Homo sapiens]'	NaN	NaN	NaN	2	NaN	NaN	NaN	NaN	2	2
928	'>gi|50659080|ref|NP_001076.2| alpha-1-antichymotrypsin precursor [Homo sapiens]'	NaN	NaN	NaN	NaN	2	NaN	NaN	NaN	2	2
929	'>gi|5174661|ref|NP_005969.1| protein S100-A2 [Homo sapiens]'	NaN	NaN	NaN	2	NaN	NaN	NaN	NaN	2	2
930	'>gi|51873067|ref|NP_001004128.1| sulfhydryl oxidase 1 isoform b precursor [Homo sapiens]'	NaN	NaN	NaN	2	NaN	NaN	NaN	NaN	2	2
931	'>gi|530378220|ref|XP_005263305.1| PREDICTED: alpha-protein kinase 1 isoform X4 [Homo sapiens]'	NaN	2	NaN	NaN	NaN	NaN	NaN	NaN	2	2
932	'>gi|530401928|ref|XP_005266229.1| PREDICTED: fibrosin-1-like protein isoform X2 [Homo sapiens]'	NaN	NaN	NaN	NaN	NaN	NaN	2	NaN	2	2
933	'>gi|530404319|ref|XP_005267977.1| PREDICTED: brain-enriched guanylate kinase-associated protein isoform X2 [Homo sapiens]'	NaN	NaN	2	NaN	NaN	NaN	NaN	NaN	2	2
934	'>gi|530404461|ref|XP_005268046.1| PREDICTED: protein sel-1 homolog 1 isoform X2 [Homo sapiens]'	NaN	NaN	NaN	2	NaN	NaN	NaN	NaN	2	2
935	'>gi|530406197|ref|XP_005254606.1| PREDICTED: beta-2-microglobulin isoform X1 [Homo sapiens]'	NaN	NaN	NaN	NaN	NaN	NaN	NaN	2	2	2
936	'>gi|530406418|ref|XP_005254710.1| PREDICTED: tropomyosin alpha-1 chain isoform X18 [Homo sapiens]'	2	NaN	NaN	NaN	NaN	NaN	NaN	NaN	2	2
937	'>gi|538920367|ref|NP_001269337.1| interleukin-1 receptor-like 1 isoform 3 [Homo sapiens]'	NaN	NaN	NaN	2	NaN	NaN	NaN	NaN	2	2
938	'>gi|540344518|ref|NP_001269374.1| EH domain-containing protein 1 isoform 2 [Homo sapiens]'	NaN	NaN	NaN	NaN	2	NaN	NaN	NaN	2	2
939	'>gi|544186102|ref|NP_001269606.1| peroxisome biogenesis factor 1 isoform 2 [Homo sapiens]'	2	NaN	NaN	NaN	NaN	NaN	NaN	NaN	2	2
940	'>gi|5454028|ref|NP_006261.1| ras-related protein R-Ras precursor [Homo sapiens]'	NaN	NaN	NaN	NaN	NaN	2	NaN	NaN	2	2
941	'>gi|557786221|ref|NP_001273578.1| serine/threonine-protein kinase 24 isoform c precursor [Homo sapiens]'	NaN	NaN	NaN	NaN	2	NaN	NaN	NaN	2	2
942	'>gi|56117840|ref|NP_000534.3| sphingomyelin phosphodiesterase isoform 1 precursor [Homo sapiens]'	NaN	NaN	NaN	NaN	2	NaN	NaN	NaN	2	2
943	'>gi|56549093|ref|NP_001008405.1| B-cell receptor-associated protein 29 isoform a [Homo sapiens]'	NaN	NaN	NaN	NaN	NaN	NaN	2	NaN	2	2
944	'>gi|56549129|ref|NP_940932.2| matrix-remodeling-associated protein 7 isoform 3 precursor [Homo sapiens]'	NaN	NaN	NaN	NaN	NaN	2	NaN	NaN	2	2
945	'>gi|573459759|ref|NP_001275951.1| protein FAM177A1 isoform 2 [Homo sapiens]'	NaN	NaN	NaN	NaN	NaN	2	NaN	NaN	2	2
946	'>gi|578805255|ref|XP_006712935.1| PREDICTED: GRIP and coiled-coil domain-containing protein 2 isoform X3 [Homo sapiens]'	NaN	NaN	NaN	NaN	NaN	NaN	NaN	2	2	2
947	'>gi|578816347|ref|XP_006716774.1| PREDICTED: serine/arginine repetitive matrix protein 3-like [Homo sapiens]'	NaN	NaN	NaN	NaN	2	NaN	NaN	NaN	2	2
948	'>gi|578830689|ref|XP_006721871.1| PREDICTED: protein TANC2 isoform X6 [Homo sapiens]'	2	NaN	NaN	NaN	NaN	NaN	NaN	NaN	2	2
949	'''>gi|578835109|ref|XP_006723528.1| PREDICTED: dual specificity tyrosine-phosphorylation-regulated kinase 1B isoform X6 [Homo sapi...'' <Preview truncated at 128 characters>'	NaN	NaN	NaN	NaN	2	NaN	NaN	NaN	2	2
950	'>gi|578843139|ref|XP_006726458.1| PREDICTED: ankyrin repeat domain-containing protein 36C isoform X14 [Homo sapiens]'	NaN	2	NaN	NaN	NaN	NaN	NaN	NaN	2	2
951	'>gi|578844916|ref|XP_006726581.1| PREDICTED: annexin A8-like [Homo sapiens]'	NaN	NaN	NaN	2	NaN	NaN	NaN	NaN	2	2
952	'>gi|6005824|ref|NP_009121.1| SEC23-interacting protein [Homo sapiens]'	NaN	NaN	2	NaN	NaN	NaN	NaN	NaN	2	2
953	'>gi|612407805|ref|NP_055490.4| rootletin [Homo sapiens]'	NaN	NaN	NaN	2	NaN	NaN	NaN	NaN	2	2
954	'>gi|62868213|ref|NP_001017408.1| Golgi-associated PDZ and coiled-coil motif-containing protein isoform b [Homo sapiens]'	NaN	NaN	NaN	NaN	2	NaN	NaN	NaN	2	2
955	'>gi|645912966|ref|NP_001280134.1| major vault protein isoform 3 [Homo sapiens]'	NaN	NaN	NaN	2	NaN	NaN	NaN	NaN	2	2
956	'>gi|665821144|ref|NP_001287923.1| tumor protein D53 isoform 6 [Homo sapiens]'	NaN	NaN	NaN	NaN	NaN	NaN	2	NaN	2	2
957	'''>gi|665821217|ref|NP_001287921.1| eukaryotic translation initiation factor 3 subunit K {ECO:0000255|HAMAP-Rule:MF_03010} isoform...'' <Preview truncated at 128 characters>'	NaN	NaN	NaN	NaN	NaN	NaN	2	NaN	2	2
958	'>gi|666637956|ref|NP_001287983.1| prenylcysteine oxidase-like isoform 2 [Homo sapiens]'	NaN	NaN	NaN	NaN	2	NaN	NaN	NaN	2	2
959	'>gi|667751615|ref|NP_001288131.1| rasGAP-activating-like protein 1 isoform 4 [Homo sapiens]'	NaN	NaN	NaN	2	NaN	NaN	NaN	NaN	2	2
960	'>gi|6678271|ref|NP_031401.1| TAR DNA-binding protein 43 [Homo sapiens]'	NaN	NaN	NaN	NaN	2	NaN	NaN	NaN	2	2
961	'>gi|68160937|ref|NP_005073.2| E3 ubiquitin/ISG15 ligase TRIM25 [Homo sapiens]'	NaN	NaN	NaN	NaN	2	NaN	NaN	NaN	2	2
962	'>gi|6912450|ref|NP_036420.1| translocating chain-associated membrane protein 2 [Homo sapiens]'	NaN	NaN	NaN	NaN	NaN	2	NaN	NaN	2	2
963	'>gi|6912582|ref|NP_036524.1| peflin [Homo sapiens]'	NaN	NaN	NaN	NaN	NaN	2	NaN	NaN	2	2
964	'>gi|70166634|ref|NP_001002020.1| tRNA pseudouridine synthase A, mitochondrial isoform 2 [Homo sapiens]'	NaN	NaN	NaN	2	NaN	NaN	NaN	NaN	2	2
965	'>gi|74271826|ref|NP_001028228.1| glutamine synthetase [Homo sapiens]'	NaN	NaN	NaN	2	NaN	NaN	NaN	NaN	2	2
966	'>gi|7705318|ref|NP_057399.1| PTB domain-containing engulfment adapter protein 1 isoform a [Homo sapiens]'	NaN	NaN	NaN	NaN	NaN	2	NaN	NaN	2	2
967	'>gi|7705819|ref|NP_057181.1| immediate early response 3-interacting protein 1 precursor [Homo sapiens]'	NaN	NaN	NaN	NaN	NaN	NaN	NaN	2	2	2
968	'>gi|81295407|ref|NP_001032248.1| acyl-coenzyme A thioesterase 9, mitochondrial isoform a precursor [Homo sapiens]'	NaN	NaN	NaN	NaN	2	NaN	NaN	NaN	2	2
969	'>gi|83376130|ref|NP_001032752.1| elongation factor 1-beta [Homo sapiens]'	NaN	NaN	NaN	2	NaN	NaN	NaN	NaN	2	2
970	'>gi|9256616|ref|NP_061761.1| protocadherin beta-4 precursor [Homo sapiens]'	2	NaN	NaN	NaN	NaN	NaN	NaN	NaN	2	2
971	'>gi|94981556|ref|NP_963925.2| protein-glutamine gamma-glutamyltransferase 5 isoform 1 [Homo sapiens]'	2	NaN	NaN	NaN	NaN	NaN	NaN	NaN	2	2
972	'>gi|9665248|ref|NP_000584.2| antigen peptide transporter 1 isoform 1 [Homo sapiens]'	NaN	NaN	NaN	NaN	2	NaN	NaN	NaN	2	2
973	'>Reverse >gi|544710995|ref|NP_001269831.1| zinc finger transcription factor Trps1 isoform 2 [Homo sapiens]'	1	1	NaN	NaN	NaN	NaN	1	1	1	4
974	'>gi|538917823|ref|NP_001269317.1| integrin beta-6 isoform d [Homo sapiens]'	NaN	1	1	1	NaN	NaN	NaN	NaN	1	3
975	'>Reverse >gi|20127499|ref|NP_006266.2| serine/arginine-rich splicing factor 6 [Homo sapiens]'	NaN	1	NaN	1	NaN	NaN	NaN	NaN	1	2
976	'>Reverse >gi|532691767|ref|NP_001269160.1| armadillo repeat-containing X-linked protein 2 [Homo sapiens]'	NaN	NaN	NaN	NaN	NaN	1	1	NaN	1	2
977	'>gi|156151366|ref|NP_054900.2| galectin-related protein [Homo sapiens]'	NaN	NaN	NaN	1	NaN	NaN	NaN	1	1	2
978	'>gi|166795268|ref|NP_057110.3| retinol dehydrogenase 11 isoform 1 precursor [Homo sapiens]'	NaN	NaN	NaN	NaN	NaN	1	1	NaN	1	2
979	'>gi|284795266|ref|NP_067026.3| signal recognition particle receptor subunit beta [Homo sapiens]'	NaN	NaN	NaN	NaN	NaN	1	1	NaN	1	2
980	'>gi|336391093|ref|NP_001229573.1| ras-related protein Rab-2A isoform b [Homo sapiens]'	NaN	NaN	NaN	1	NaN	1	NaN	NaN	1	2
981	'>gi|4504415|ref|NP_002118.1| HLA class I histocompatibility antigen, alpha chain G precursor [Homo sapiens]'	NaN	NaN	NaN	NaN	1	1	NaN	NaN	1	2
982	'>gi|4758256|ref|NP_004085.1| eukaryotic translation initiation factor 2 subunit 1 [Homo sapiens]'	NaN	NaN	NaN	1	NaN	1	NaN	NaN	1	2
983	'>gi|4758302|ref|NP_004441.1| enhancer of rudimentary homolog [Homo sapiens]'	NaN	NaN	NaN	1	NaN	NaN	NaN	1	1	2
984	'>gi|5174663|ref|NP_005971.1| protein S100-P [Homo sapiens]'	NaN	NaN	NaN	1	NaN	NaN	NaN	1	1	2
985	'>gi|5803133|ref|NP_006825.1| ras-related protein Rab-32 [Homo sapiens]'	NaN	1	NaN	NaN	NaN	NaN	NaN	1	1	2
986	'>gi|61676188|ref|NP_113584.3| E3 ubiquitin-protein ligase HUWE1 [Homo sapiens]'	1	1	NaN	NaN	NaN	NaN	NaN	NaN	1	2
987	'>sp|CASB_BOVIN|(Common contaminant protein)'	NaN	1	1	NaN	NaN	NaN	NaN	NaN	1	2
988	'>Reverse >gi|109134355|ref|NP_057206.2| centrosomal protein of 83 kDa [Homo sapiens]'	1	NaN	NaN	NaN	NaN	NaN	NaN	NaN	1	1
989	'>Reverse >gi|110556636|ref|NP_203754.2| 182 kDa tankyrase-1-binding protein [Homo sapiens]'	NaN	NaN	NaN	1	NaN	NaN	NaN	NaN	1	1
990	'>Reverse >gi|14210514|ref|NP_115896.1| piggyBac transposable element-derived protein 1 [Homo sapiens]'	NaN	1	NaN	NaN	NaN	NaN	NaN	NaN	1	1
991	'>Reverse >gi|170650643|ref|NP_056297.1| solute carrier family 22 member 23 isoform a [Homo sapiens]'	NaN	1	NaN	NaN	NaN	NaN	NaN	NaN	1	1
992	'>Reverse >gi|188595682|ref|NP_001120965.1| ankyrin-2 isoform 3 [Homo sapiens]'	NaN	NaN	NaN	1	NaN	NaN	NaN	NaN	1	1
993	'>Reverse >gi|194272228|ref|NP_001123564.1| leucine-rich repeat-containing protein 48 isoform b [Homo sapiens]'	NaN	NaN	NaN	NaN	NaN	1	NaN	NaN	1	1
994	'>Reverse >gi|20070125|ref|NP_000909.2| protein disulfide-isomerase precursor [Homo sapiens]'	NaN	NaN	1	NaN	NaN	NaN	NaN	NaN	1	1
995	'>Reverse >gi|205360925|ref|NP_001128564.1| mucin-15 isoform c [Homo sapiens]'	NaN	NaN	NaN	1	NaN	NaN	NaN	NaN	1	1
996	'>Reverse >gi|225637477|ref|NP_001139480.1| solute carrier organic anion transporter family member 5A1 isoform 2 [Homo sapiens]'	NaN	1	NaN	NaN	NaN	NaN	NaN	NaN	1	1
997	'>Reverse >gi|226342869|ref|NP_001139686.1| TBC1 domain family member 15 isoform 2 [Homo sapiens]'	1	NaN	NaN	NaN	NaN	NaN	NaN	NaN	1	1
998	'>Reverse >gi|238908499|ref|NP_659001.2| sciellin isoform 1 [Homo sapiens]'	NaN	1	NaN	NaN	NaN	NaN	NaN	NaN	1	1
999	'>Reverse >gi|254675185|ref|NP_853517.2| keratin, type I cytoskeletal 26 [Homo sapiens]'	1	NaN	NaN	NaN	NaN	NaN	NaN	NaN	1	1
1000	'>Reverse >gi|285026441|ref|NP_001165377.1| U8 snoRNA-decapping enzyme isoform 1 [Homo sapiens]'	NaN	NaN	NaN	NaN	NaN	NaN	1	NaN	1	1
1001	'>Reverse >gi|33300635|ref|NP_006773.2| zinc finger protein-like 1 [Homo sapiens]'	NaN	NaN	1	NaN	NaN	NaN	NaN	NaN	1	1
1002	'>Reverse >gi|39930371|ref|NP_059986.1| ras-related protein Rab-39A [Homo sapiens]'	NaN	NaN	NaN	1	NaN	NaN	NaN	NaN	1	1
1003	'>Reverse >gi|41152097|ref|NP_005079.2| A-kinase anchor protein 17A isoform 1 [Homo sapiens]'	NaN	NaN	NaN	NaN	NaN	1	NaN	NaN	1	1
1004	'>Reverse >gi|4504695|ref|NP_001555.1| inhibitor of growth protein 2 isoform 1 [Homo sapiens]'	NaN	NaN	NaN	1	NaN	NaN	NaN	NaN	1	1
1005	'>Reverse >gi|51093861|ref|NP_055365.2| caspase recruitment domain-containing protein 10 [Homo sapiens]'	NaN	NaN	NaN	NaN	NaN	NaN	NaN	1	1	1
1006	'>Reverse >gi|5174647|ref|NP_005966.1| protein-tyrosine kinase 6 isoform 1 [Homo sapiens]'	NaN	NaN	NaN	NaN	NaN	1	NaN	NaN	1	1
1007	'>Reverse >gi|530392124|ref|XP_005252492.1| PREDICTED: la-related protein 4B isoform X5 [Homo sapiens]'	1	NaN	NaN	NaN	NaN	NaN	NaN	NaN	1	1
1008	'>Reverse >gi|530406610|ref|XP_005254804.1| PREDICTED: probable E3 ubiquitin-protein ligase HERC1 isoform X6 [Homo sapiens]'	NaN	NaN	1	NaN	NaN	NaN	NaN	NaN	1	1
1009	'>Reverse >gi|530420023|ref|XP_005261632.1| PREDICTED: small G protein signaling modulator 3 isoform X4 [Homo sapiens]'	NaN	NaN	NaN	NaN	NaN	NaN	1	NaN	1	1
1010	'>Reverse >gi|530426079|ref|XP_005260947.1| PREDICTED: leucine zipper putative tumor suppressor 3 isoform X1 [Homo sapiens]'	NaN	1	NaN	NaN	NaN	NaN	NaN	NaN	1	1
1011	'>Reverse >gi|531034767|ref|NP_001269072.1| NLR family member X1 precursor [Homo sapiens]'	NaN	NaN	NaN	NaN	NaN	1	NaN	NaN	1	1
1012	'>Reverse >gi|533112502|ref|NP_955373.3| uncharacterized protein C19orf68 [Homo sapiens]'	NaN	NaN	NaN	NaN	NaN	NaN	NaN	1	1	1
1013	'>Reverse >gi|542133165|ref|NP_001269464.1| paraneoplastic antigen Ma3 isoform 2 [Homo sapiens]'	NaN	NaN	NaN	NaN	NaN	NaN	NaN	1	1	1
1014	'''>Reverse >gi|544709756|ref|NP_001269857.1| leucine-rich repeat transmembrane neuronal protein 4 isoform c precursor [Homo sapien...'' <Preview truncated at 128 characters>'	NaN	NaN	NaN	NaN	NaN	1	NaN	NaN	1	1
1015	'>Reverse >gi|56090582|ref|NP_001007562.1| immunity-related GTPase family Q protein [Homo sapiens]'	NaN	NaN	NaN	NaN	NaN	1	NaN	NaN	1	1
1016	'>Reverse >gi|578800544|ref|XP_006711227.1| PREDICTED: DC-STAMP domain-containing protein 2 isoform X1 [Homo sapiens]'	NaN	NaN	NaN	NaN	NaN	NaN	NaN	1	1	1
1017	'>Reverse >gi|76563940|ref|NP_005451.2| synphilin-1 isoform 1 [Homo sapiens]'	1	NaN	NaN	NaN	NaN	NaN	NaN	NaN	1	1
1018	'>Reverse >gi|8923900|ref|NP_061156.1| N-acylneuraminate cytidylyltransferase [Homo sapiens]'	NaN	NaN	1	NaN	NaN	NaN	NaN	NaN	1	1
1019	'>Reverse >gi|93204865|ref|NP_066015.2| ectopic P granules protein 5 homolog [Homo sapiens]'	NaN	NaN	NaN	NaN	1	NaN	NaN	NaN	1	1
1020	'>Reverse >gi|9966913|ref|NP_065178.1| actin-related protein 3B isoform 1 [Homo sapiens]'	NaN	NaN	NaN	NaN	1	NaN	NaN	NaN	1	1
1021	'>gi|10334859|ref|NP_066270.1| creatine kinase U-type, mitochondrial precursor [Homo sapiens]'	NaN	NaN	NaN	1	NaN	NaN	NaN	NaN	1	1
1022	'>gi|110238585|ref|NP_116037.2| protein FAM167B [Homo sapiens]'	NaN	NaN	NaN	1	NaN	NaN	NaN	NaN	1	1
1023	'>gi|11345462|ref|NP_068747.1| signal peptidase complex subunit 3 [Homo sapiens]'	NaN	NaN	NaN	NaN	NaN	NaN	1	NaN	1	1
1024	'>gi|114155142|ref|NP_003283.2| nucleoprotein TPR [Homo sapiens]'	NaN	1	NaN	NaN	NaN	NaN	NaN	NaN	1	1
1025	'>gi|116063568|ref|NP_060193.2| torsin-4A [Homo sapiens]'	NaN	NaN	NaN	1	NaN	NaN	NaN	NaN	1	1
1026	'>gi|11641237|ref|NP_071732.1| ras-related protein Rab-38 [Homo sapiens]'	NaN	NaN	NaN	NaN	NaN	1	NaN	NaN	1	1
1027	'>gi|117189975|ref|NP_112604.2| heterogeneous nuclear ribonucleoproteins C1/C2 isoform a [Homo sapiens]'	NaN	NaN	NaN	1	NaN	NaN	NaN	NaN	1	1
1028	'>gi|117306167|ref|NP_006240.4| basic salivary proline-rich protein 3 precursor [Homo sapiens]'	1	NaN	NaN	NaN	NaN	NaN	NaN	NaN	1	1
1029	'>gi|119392077|ref|NP_036426.3| rap guanine nucleotide exchange factor 5 [Homo sapiens]'	1	NaN	NaN	NaN	NaN	NaN	NaN	NaN	1	1
1030	'>gi|13027602|ref|NP_076424.1| DDRGK domain-containing protein 1 precursor [Homo sapiens]'	NaN	NaN	NaN	NaN	NaN	1	NaN	NaN	1	1
1031	'>gi|13124770|ref|NP_076869.1| vitamin K epoxide reductase complex subunit 1 isoform 1 precursor [Homo sapiens]'	NaN	NaN	NaN	NaN	NaN	NaN	NaN	1	1	1
1032	'>gi|131412228|ref|NP_002265.2| keratin, type I cytoskeletal 13 isoform b [Homo sapiens]'	1	NaN	NaN	NaN	NaN	NaN	NaN	NaN	1	1
1033	'>gi|13376181|ref|NP_079079.1| tubulin alpha chain-like 3 isoform 1 [Homo sapiens]'	NaN	NaN	NaN	NaN	1	NaN	NaN	NaN	1	1
1034	'>gi|13430848|ref|NP_068370.1| nuclear receptor subfamily 1 group D member 1 [Homo sapiens]'	NaN	NaN	NaN	1	NaN	NaN	NaN	NaN	1	1
1035	'>gi|14192943|ref|NP_115822.1| multiple epidermal growth factor-like domains protein 10 precursor [Homo sapiens]'	NaN	NaN	NaN	NaN	NaN	NaN	1	NaN	1	1
1036	'>gi|148233596|ref|NP_006717.2| lipopolysaccharide-responsive and beige-like anchor protein isoform 2 [Homo sapiens]'	NaN	1	NaN	NaN	NaN	NaN	NaN	NaN	1	1
1037	'>gi|15055539|ref|NP_002943.2| 40S ribosomal protein S2 [Homo sapiens]'	NaN	NaN	NaN	NaN	NaN	NaN	1	NaN	1	1
1038	'>gi|15088795|ref|NP_149975.1| GPI transamidase component PIG-S [Homo sapiens]'	NaN	NaN	NaN	NaN	1	NaN	NaN	NaN	1	1
1039	'>gi|156104862|ref|NP_859063.3| KN motif and ankyrin repeat domain-containing protein 4 [Homo sapiens]'	NaN	1	NaN	NaN	NaN	NaN	NaN	NaN	1	1
1040	'>gi|157168362|ref|NP_000261.2| purine nucleoside phosphorylase [Homo sapiens]'	NaN	NaN	NaN	NaN	1	NaN	NaN	NaN	1	1
1041	'>gi|166795297|ref|NP_057225.2| cytoplasmic dynein 1 light intermediate chain 1 [Homo sapiens]'	NaN	NaN	NaN	NaN	1	NaN	NaN	NaN	1	1
1042	'>gi|17738287|ref|NP_524558.1| secretory carrier-associated membrane protein 4 [Homo sapiens]'	NaN	NaN	NaN	NaN	NaN	NaN	1	NaN	1	1
1043	'>gi|18379366|ref|NP_005848.2| CAAX prenyl protease 1 homolog [Homo sapiens]'	NaN	NaN	NaN	NaN	NaN	1	NaN	NaN	1	1
1044	'>gi|188536094|ref|NP_001120926.1| non-syndromic hearing impairment protein 5 isoform b [Homo sapiens]'	NaN	NaN	NaN	NaN	1	NaN	NaN	NaN	1	1
1045	'>gi|188595687|ref|NP_001120959.1| filamin-C isoform b [Homo sapiens]'	NaN	1	NaN	NaN	NaN	NaN	NaN	NaN	1	1
1046	'>gi|195927017|ref|NP_001124320.1| membrane-associated phosphatidylinositol transfer protein 1 isoform b [Homo sapiens]'	NaN	NaN	1	NaN	NaN	NaN	NaN	NaN	1	1
1047	'>gi|19923985|ref|NP_612462.1| ras-related protein Rab-3C [Homo sapiens]'	NaN	NaN	NaN	NaN	NaN	1	NaN	NaN	1	1
1048	'>gi|205360840|ref|NP_001128582.1| dnaJ homolog subfamily A member 3, mitochondrial isoform 2 [Homo sapiens]'	NaN	NaN	NaN	NaN	1	NaN	NaN	NaN	1	1
1049	'>gi|208879470|ref|NP_001129122.1| eukaryotic translation elongation factor 1 epsilon-1 isoform 2 [Homo sapiens]'	NaN	NaN	NaN	NaN	NaN	NaN	1	NaN	1	1
1050	'>gi|21359888|ref|NP_005997.2| zinc finger and BTB domain-containing protein 16 [Homo sapiens]'	NaN	NaN	NaN	1	NaN	NaN	NaN	NaN	1	1
1051	'>gi|21361565|ref|NP_001679.2| ATP synthase F(0) complex subunit B1, mitochondrial precursor [Homo sapiens]'	NaN	NaN	NaN	NaN	NaN	NaN	1	NaN	1	1
1052	'>gi|214830451|ref|NP_001135771.1| sequestosome-1 isoform 2 [Homo sapiens]'	NaN	NaN	NaN	NaN	1	NaN	NaN	NaN	1	1
1053	'>gi|217330646|ref|NP_006704.3| activated RNA polymerase II transcriptional coactivator p15 [Homo sapiens]'	NaN	NaN	NaN	1	NaN	NaN	NaN	NaN	1	1
1054	'>gi|219689110|ref|NP_001137290.1| plasminogen activator inhibitor 2 [Homo sapiens]'	NaN	NaN	NaN	1	NaN	NaN	NaN	NaN	1	1
1055	'>gi|22035653|ref|NP_663612.1| apolipoprotein L2 [Homo sapiens]'	NaN	NaN	NaN	NaN	NaN	1	NaN	NaN	1	1
1056	'>gi|221218998|ref|NP_001137391.1| leukotriene B4 receptor 1 [Homo sapiens]'	1	NaN	NaN	NaN	NaN	NaN	NaN	NaN	1	1
1057	'>gi|221307571|ref|NP_001138296.1| zinc finger protein 234 [Homo sapiens]'	NaN	1	NaN	NaN	NaN	NaN	NaN	NaN	1	1
1058	'>gi|222418615|ref|NP_001138469.1| integrin alpha-7 isoform 3 [Homo sapiens]'	NaN	NaN	NaN	NaN	NaN	1	NaN	NaN	1	1
1059	'>gi|223555975|ref|NP_001138632.1| tropomyosin alpha-4 chain isoform Tpm4.1cy [Homo sapiens]'	NaN	NaN	NaN	1	NaN	NaN	NaN	NaN	1	1
1060	'>gi|224028248|ref|NP_001138882.1| non-POU domain-containing octamer-binding protein isoform 2 [Homo sapiens]'	NaN	NaN	NaN	NaN	1	NaN	NaN	NaN	1	1
1061	'>gi|22538435|ref|NP_680092.1| cathepsin B preproprotein [Homo sapiens]'	NaN	NaN	NaN	NaN	NaN	1	NaN	NaN	1	1
1062	'>gi|227498137|ref|NP_060829.2| ufm1-specific protease 2 [Homo sapiens]'	NaN	NaN	NaN	NaN	1	NaN	NaN	NaN	1	1
1063	'>gi|228008321|ref|NP_001004318.2| iron/zinc purple acid phosphatase-like protein precursor [Homo sapiens]'	NaN	NaN	NaN	NaN	1	NaN	NaN	NaN	1	1
1064	'>gi|23111034|ref|NP_003090.2| sorting nexin-1 isoform a [Homo sapiens]'	NaN	NaN	NaN	NaN	1	NaN	NaN	NaN	1	1
1065	'>gi|239937451|ref|NP_001155238.1| adenosylhomocysteinase isoform 2 [Homo sapiens]'	NaN	NaN	NaN	NaN	1	NaN	NaN	NaN	1	1
1066	'>gi|24307939|ref|NP_036205.1| T-complex protein 1 subunit epsilon [Homo sapiens]'	NaN	NaN	NaN	1	NaN	NaN	NaN	NaN	1	1
1067	'>gi|24307965|ref|NP_055422.1| UBX domain-containing protein 4 [Homo sapiens]'	NaN	NaN	NaN	NaN	1	NaN	NaN	NaN	1	1
1068	'>gi|24308097|ref|NP_056415.1| monoacylglycerol lipase ABHD12 isoform b [Homo sapiens]'	NaN	NaN	NaN	NaN	1	NaN	NaN	NaN	1	1
1069	'>gi|24797067|ref|NP_002107.3| HLA class I histocompatibility antigen, A-1 alpha chain precursor [Homo sapiens]'	NaN	NaN	NaN	NaN	NaN	1	NaN	NaN	1	1
1070	'>gi|260447062|ref|NP_001159507.1| suprabasin isoform 3 precursor [Homo sapiens]'	NaN	NaN	1	NaN	NaN	NaN	NaN	NaN	1	1
1071	'>gi|27363461|ref|NP_057153.8| mitochondrial import inner membrane translocase subunit TIM16 [Homo sapiens]'	NaN	NaN	NaN	1	NaN	NaN	NaN	NaN	1	1
1072	'>gi|288541299|ref|NP_612398.2| protein NOXP20 [Homo sapiens]'	NaN	NaN	NaN	NaN	1	NaN	NaN	NaN	1	1
1073	'>gi|28872725|ref|NP_002806.2| 26S proteasome non-ATPase regulatory subunit 11 [Homo sapiens]'	NaN	NaN	NaN	NaN	1	NaN	NaN	NaN	1	1
1074	'>gi|289063435|ref|NP_001165911.1| poly(U)-specific endoribonuclease isoform 3 precursor [Homo sapiens]'	NaN	NaN	NaN	1	NaN	NaN	NaN	NaN	1	1
1075	'>gi|294345475|ref|NP_001170859.1| galectin-3 isoform 2 [Homo sapiens]'	NaN	NaN	NaN	1	NaN	NaN	NaN	NaN	1	1
1076	'>gi|296080746|ref|NP_001171669.1| src substrate cortactin isoform c [Homo sapiens]'	NaN	NaN	NaN	NaN	1	NaN	NaN	NaN	1	1
1077	'>gi|296317239|ref|NP_001171724.1| peroxisomal membrane protein 11B isoform 2 [Homo sapiens]'	NaN	NaN	NaN	NaN	NaN	NaN	1	NaN	1	1
1078	'>gi|298566206|ref|NP_001119528.2| dermokine isoform 3 precursor [Homo sapiens]'	NaN	NaN	NaN	1	NaN	NaN	NaN	NaN	1	1
1079	'>gi|300388183|ref|NP_001177966.1| 26S proteasome non-ATPase regulatory subunit 1 isoform 2 [Homo sapiens]'	NaN	NaN	NaN	1	NaN	NaN	NaN	NaN	1	1
1080	'>gi|303519415|ref|NP_001182000.1| transmembrane protein 184B isoform a [Homo sapiens]'	NaN	NaN	NaN	1	NaN	NaN	NaN	NaN	1	1
1081	'>gi|30795231|ref|NP_006308.3| brain acid soluble protein 1 [Homo sapiens]'	NaN	NaN	NaN	NaN	1	NaN	NaN	NaN	1	1
1082	'>gi|31377806|ref|NP_002635.2| polymeric immunoglobulin receptor precursor [Homo sapiens]'	1	NaN	NaN	NaN	NaN	NaN	NaN	NaN	1	1
1083	'>gi|315360635|ref|NP_001186757.1| cornifin-A [Homo sapiens]'	NaN	NaN	NaN	NaN	1	NaN	NaN	NaN	1	1
1084	'>gi|31543831|ref|NP_001061.2| tubulin gamma-1 chain [Homo sapiens]'	NaN	NaN	NaN	NaN	1	NaN	NaN	NaN	1	1
1085	'>gi|324120908|ref|NP_065920.2| doublecortin domain-containing protein 5 [Homo sapiens]'	NaN	NaN	NaN	1	NaN	NaN	NaN	NaN	1	1
1086	'>gi|32483399|ref|NP_002568.2| serine/threonine-protein kinase PAK 2 [Homo sapiens]'	NaN	NaN	NaN	1	NaN	NaN	NaN	NaN	1	1
1087	'>gi|325053652|ref|NP_001191382.1| 26S protease regulatory subunit 7 isoform 2 [Homo sapiens]'	NaN	NaN	NaN	1	NaN	NaN	NaN	NaN	1	1
1088	'>gi|332164777|ref|NP_001193726.1| pyruvate kinase PKM isoform d [Homo sapiens]'	NaN	NaN	NaN	NaN	1	NaN	NaN	NaN	1	1
1089	'>gi|333609286|ref|NP_001193982.1| kallikrein-7 isoform 2 [Homo sapiens]'	NaN	NaN	NaN	NaN	NaN	1	NaN	NaN	1	1
1090	'>gi|338753391|ref|NP_001229712.1| tripartite motif-containing protein 26 [Homo sapiens]'	NaN	NaN	NaN	NaN	1	NaN	NaN	NaN	1	1
1091	'>gi|339409180|ref|NP_001229861.1| lymphocyte-specific protein 1 isoform 3 [Homo sapiens]'	NaN	NaN	1	NaN	NaN	NaN	NaN	NaN	1	1
1092	'>gi|348041379|ref|NP_001231695.1| MOB kinase activator 1B isoform 1 [Homo sapiens]'	NaN	NaN	NaN	NaN	NaN	NaN	1	NaN	1	1
1093	'>gi|365733566|ref|NP_001242953.1| rho GTPase-activating protein 22 isoform 1 [Homo sapiens]'	NaN	NaN	NaN	NaN	1	NaN	NaN	NaN	1	1
1094	'>gi|377823713|ref|NP_001243719.1| voltage-dependent L-type calcium channel subunit alpha-1F isoform 3 [Homo sapiens]'	NaN	1	NaN	NaN	NaN	NaN	NaN	NaN	1	1
1095	'>gi|379642611|ref|NP_001243838.1| cytochrome b reductase 1 isoform 3 [Homo sapiens]'	NaN	NaN	NaN	NaN	NaN	NaN	1	NaN	1	1
1096	'>gi|386781688|ref|NP_001247431.1| signal recognition particle subunit SRP68 isoform 2 [Homo sapiens]'	NaN	NaN	NaN	NaN	1	NaN	NaN	NaN	1	1
1097	'>gi|389886539|ref|NP_001254507.1| torsin-1A-interacting protein 1 isoform 1 [Homo sapiens]'	NaN	NaN	NaN	NaN	1	NaN	NaN	NaN	1	1
1098	'>gi|392841224|ref|NP_001255968.1| leucine-rich repeat protein SHOC-2 isoform 2 [Homo sapiens]'	1	NaN	NaN	NaN	NaN	NaN	NaN	NaN	1	1
1099	'>gi|410444379|ref|NP_001258537.1| LIM and SH3 domain protein 1 isoform b [Homo sapiens]'	NaN	NaN	NaN	NaN	NaN	1	NaN	NaN	1	1
1100	'>gi|422398896|ref|NP_001258717.1| cytoplasmic dynein 1 intermediate chain 2 isoform 3 [Homo sapiens]'	NaN	NaN	NaN	NaN	1	NaN	NaN	NaN	1	1
1101	'>gi|42558279|ref|NP_817124.1| tubulin beta-8 chain [Homo sapiens]'	NaN	NaN	NaN	NaN	1	NaN	NaN	NaN	1	1
1102	'>gi|42741675|ref|NP_976227.1| PDZ and LIM domain protein 7 isoform 2 [Homo sapiens]'	NaN	NaN	NaN	NaN	NaN	1	NaN	NaN	1	1
1103	'>gi|440918682|ref|NP_001258998.1| mycophenolic acid acyl-glucuronide esterase, mitochondrial isoform 2 [Homo sapiens]'	NaN	NaN	1	NaN	NaN	NaN	NaN	NaN	1	1
1104	'>gi|441478305|ref|NP_001259002.1| glutamine--tRNA ligase isoform b [Homo sapiens]'	NaN	NaN	NaN	1	NaN	NaN	NaN	NaN	1	1
1105	'>gi|4502205|ref|NP_001651.1| ADP-ribosylation factor 4 [Homo sapiens]'	NaN	NaN	NaN	NaN	NaN	NaN	1	NaN	1	1
1106	'>gi|4502861|ref|NP_001275.1| AP-3 complex subunit sigma-1 [Homo sapiens]'	NaN	NaN	NaN	NaN	NaN	NaN	1	NaN	1	1
1107	'>gi|4502981|ref|NP_001852.1| cytochrome c oxidase subunit 4 isoform 1, mitochondrial precursor [Homo sapiens]'	NaN	NaN	NaN	1	NaN	NaN	NaN	NaN	1	1
1108	'>gi|4503363|ref|NP_003850.1| dolichol-phosphate mannosyltransferase subunit 1 [Homo sapiens]'	NaN	NaN	NaN	NaN	NaN	NaN	1	NaN	1	1
1109	'>gi|4504041|ref|NP_002061.1| guanine nucleotide-binding protein G(i) subunit alpha-2 isoform 1 [Homo sapiens]'	NaN	NaN	NaN	NaN	NaN	1	NaN	NaN	1	1
1110	'>gi|4504771|ref|NP_002203.1| eukaryotic translation initiation factor 6 isoform a [Homo sapiens]'	NaN	NaN	NaN	NaN	NaN	1	NaN	NaN	1	1
1111	'>gi|4504789|ref|NP_002211.1| inositol-trisphosphate 3-kinase A [Homo sapiens]'	1	NaN	NaN	NaN	NaN	NaN	NaN	NaN	1	1
1112	'>gi|4505143|ref|NP_002386.1| NADP-dependent malic enzyme [Homo sapiens]'	NaN	NaN	NaN	1	NaN	NaN	NaN	NaN	1	1
1113	'>gi|4505169|ref|NP_002402.1| mammaglobin-A precursor [Homo sapiens]'	NaN	NaN	NaN	1	NaN	NaN	NaN	NaN	1	1
1114	'>gi|4506289|ref|NP_002818.1| tyrosine-protein phosphatase non-receptor type 1 isoform 1 [Homo sapiens]'	NaN	NaN	NaN	NaN	1	NaN	NaN	NaN	1	1
1115	'>gi|4506363|ref|NP_002861.1| ras-related protein Rab-13 isoform 1 [Homo sapiens]'	NaN	NaN	NaN	NaN	NaN	NaN	1	NaN	1	1
1116	'>gi|4506367|ref|NP_002857.1| ras-related protein Rab-3A [Homo sapiens]'	NaN	NaN	NaN	NaN	NaN	NaN	1	NaN	1	1
1117	'>gi|4506621|ref|NP_000978.1| 60S ribosomal protein L26 [Homo sapiens]'	NaN	NaN	NaN	1	NaN	NaN	NaN	NaN	1	1
1118	'>gi|4506697|ref|NP_001014.1| 40S ribosomal protein S20 isoform 2 [Homo sapiens]'	NaN	NaN	NaN	NaN	NaN	NaN	NaN	1	1	1
1119	'>gi|4506707|ref|NP_001019.1| 40S ribosomal protein S25 [Homo sapiens]'	NaN	NaN	NaN	NaN	NaN	NaN	NaN	1	1	1
1120	'>gi|4506901|ref|NP_003008.1| serine/arginine-rich splicing factor 3 [Homo sapiens]'	NaN	NaN	NaN	NaN	NaN	NaN	1	NaN	1	1
1121	'>gi|4507129|ref|NP_003085.1| small nuclear ribonucleoprotein E [Homo sapiens]'	NaN	NaN	NaN	NaN	1	NaN	NaN	NaN	1	1
1122	'>gi|4507793|ref|NP_003339.1| ubiquitin-conjugating enzyme E2 N [Homo sapiens]'	NaN	NaN	NaN	1	NaN	NaN	NaN	NaN	1	1
1123	'>gi|4507831|ref|NP_003556.1| serine/threonine-protein kinase ULK1 [Homo sapiens]'	NaN	NaN	NaN	NaN	1	NaN	NaN	NaN	1	1
1124	'>gi|47078281|ref|NP_055476.3| protein FAM53B [Homo sapiens]'	NaN	NaN	NaN	1	NaN	NaN	NaN	NaN	1	1
1125	'>gi|4759000|ref|NP_004274.1| ras-related protein Rab-3D [Homo sapiens]'	NaN	NaN	NaN	NaN	NaN	1	NaN	NaN	1	1
1126	'>gi|4759082|ref|NP_004648.1| serum deprivation-response protein [Homo sapiens]'	NaN	NaN	1	NaN	NaN	NaN	NaN	NaN	1	1
1127	'>gi|47717098|ref|NP_653184.2| V-type proton ATPase subunit C 2 isoform b [Homo sapiens]'	NaN	NaN	NaN	1	NaN	NaN	NaN	NaN	1	1
1128	'>gi|47933379|ref|NP_003818.2| alpha-soluble NSF attachment protein [Homo sapiens]'	NaN	NaN	NaN	NaN	NaN	1	NaN	NaN	1	1
1129	'>gi|4826686|ref|NP_004930.1| ATP-dependent RNA helicase DDX1 [Homo sapiens]'	NaN	NaN	NaN	1	NaN	NaN	NaN	NaN	1	1
1130	'>gi|4826878|ref|NP_005100.1| serine/threonine-protein kinase OSR1 [Homo sapiens]'	NaN	NaN	1	NaN	NaN	NaN	NaN	NaN	1	1
1131	'>gi|48314820|ref|NP_060040.1| 5-oxoprolinase [Homo sapiens]'	NaN	NaN	NaN	NaN	NaN	NaN	NaN	1	1	1
1132	'>gi|4885375|ref|NP_005310.1| histone H1.2 [Homo sapiens]'	NaN	NaN	NaN	NaN	NaN	NaN	1	NaN	1	1
1133	'>gi|5174445|ref|NP_006046.1| lanC-like protein 1 [Homo sapiens]'	NaN	NaN	NaN	NaN	NaN	1	NaN	NaN	1	1
1134	'>gi|5174539|ref|NP_005908.1| malate dehydrogenase, cytoplasmic isoform 2 [Homo sapiens]'	NaN	NaN	NaN	1	NaN	NaN	NaN	NaN	1	1
1135	'>gi|5174615|ref|NP_006058.1| ER membrane protein complex subunit 8 isoform 1 [Homo sapiens]'	NaN	NaN	NaN	NaN	NaN	NaN	1	NaN	1	1
1136	'>gi|52426745|ref|NP_005179.2| E3 ubiquitin-protein ligase CBL [Homo sapiens]'	NaN	1	NaN	NaN	NaN	NaN	NaN	NaN	1	1
1137	'>gi|528524524|ref|NP_001268669.1| FH1/FH2 domain-containing protein 3 isoform 3 [Homo sapiens]'	1	NaN	NaN	NaN	NaN	NaN	NaN	NaN	1	1
1138	'>gi|530368185|ref|XP_005264656.1| PREDICTED: protein YIPF4 isoform X1 [Homo sapiens]'	NaN	NaN	NaN	NaN	NaN	NaN	1	NaN	1	1
1139	'>gi|530384412|ref|XP_005249639.1| PREDICTED: synaptobrevin homolog YKT6 isoform X1 [Homo sapiens]'	NaN	NaN	NaN	NaN	NaN	NaN	1	NaN	1	1
1140	'>gi|530387123|ref|XP_005250110.1| PREDICTED: zyxin isoform X2 [Homo sapiens]'	NaN	NaN	NaN	NaN	1	NaN	NaN	NaN	1	1
1141	'>gi|530397289|ref|XP_005274302.1| PREDICTED: neuroblast differentiation-associated protein AHNAK isoform X6 [Homo sapiens]'	NaN	NaN	NaN	1	NaN	NaN	NaN	NaN	1	1
1142	'>gi|530397291|ref|XP_005274303.1| PREDICTED: neuroblast differentiation-associated protein AHNAK isoform X7 [Homo sapiens]'	NaN	NaN	1	NaN	NaN	NaN	NaN	NaN	1	1
1143	'>gi|530413015|ref|XP_005257805.1| PREDICTED: contactin-associated protein 1 isoform X1 [Homo sapiens]'	NaN	NaN	1	NaN	NaN	NaN	NaN	NaN	1	1
1144	'>gi|530413105|ref|XP_005257849.1| PREDICTED: synaptogyrin-2 isoform X1 [Homo sapiens]'	NaN	NaN	NaN	NaN	NaN	1	NaN	NaN	1	1
1145	'>gi|530428926|ref|XP_005275295.1| PREDICTED: HLA class I histocompatibility antigen, B-15 alpha chain isoform X1 [Homo sapiens]'	NaN	NaN	NaN	NaN	NaN	1	NaN	NaN	1	1
1146	'>gi|5453990|ref|NP_006254.1| proteasome activator complex subunit 1 isoform 1 [Homo sapiens]'	NaN	NaN	NaN	NaN	NaN	1	NaN	NaN	1	1
1147	'>gi|546231978|ref|NP_001271190.1| WD repeat-containing protein 86 isoform 3 [Homo sapiens]'	NaN	NaN	NaN	1	NaN	NaN	NaN	NaN	1	1
1148	'>gi|548923860|ref|NP_001271337.1| transmembrane protein 40 isoform d [Homo sapiens]'	NaN	NaN	NaN	1	NaN	NaN	NaN	NaN	1	1
1149	'>gi|557440906|ref|NP_001273515.1| CDP-diacylglycerol--inositol 3-phosphatidyltransferase isoform 3 [Homo sapiens]'	NaN	NaN	NaN	NaN	NaN	NaN	1	NaN	1	1
1150	'>gi|55770836|ref|NP_057086.2| saccharopine dehydrogenase-like oxidoreductase [Homo sapiens]'	NaN	NaN	NaN	NaN	1	NaN	NaN	NaN	1	1
1151	'>gi|5729909|ref|NP_006542.1| secretoglobin family 1D member 2 precursor [Homo sapiens]'	NaN	1	NaN	NaN	NaN	NaN	NaN	NaN	1	1
1152	'>gi|5729953|ref|NP_006591.1| nuclear migration protein nudC [Homo sapiens]'	NaN	NaN	NaN	NaN	1	NaN	NaN	NaN	1	1
1153	'>gi|574278942|ref|NP_001276022.1| histidine--tRNA ligase, cytoplasmic isoform 6 [Homo sapiens]'	NaN	NaN	NaN	1	NaN	NaN	NaN	NaN	1	1
1154	'>gi|574584811|ref|NP_001276056.1| tubulin beta-4A chain isoform 2 [Homo sapiens]'	NaN	NaN	NaN	NaN	1	NaN	NaN	NaN	1	1
1155	'>gi|578800858|ref|XP_006711350.1| PREDICTED: protein S100-A7A isoform X1 [Homo sapiens]'	NaN	NaN	NaN	NaN	NaN	NaN	1	NaN	1	1
1156	'>gi|578818374|ref|XP_006717495.1| PREDICTED: ankyrin repeat domain-containing protein 26 isoform X10 [Homo sapiens]'	NaN	NaN	1	NaN	NaN	NaN	NaN	NaN	1	1
1157	'>gi|578827470|ref|XP_006720776.1| PREDICTED: ADP-dependent glucokinase isoform X2 [Homo sapiens]'	NaN	NaN	NaN	NaN	1	NaN	NaN	NaN	1	1
1158	'>gi|6005717|ref|NP_009031.1| ATP synthase subunit e, mitochondrial [Homo sapiens]'	NaN	NaN	NaN	NaN	NaN	NaN	NaN	1	1	1
1159	'>gi|6005872|ref|NP_009145.1| translocation protein SEC63 homolog [Homo sapiens]'	NaN	NaN	NaN	NaN	1	NaN	NaN	NaN	1	1
1160	'>gi|62912476|ref|NP_004131.3| lethal(2) giant larvae protein homolog 1 [Homo sapiens]'	NaN	NaN	NaN	1	NaN	NaN	NaN	NaN	1	1
1161	'>gi|631226406|ref|NP_001278825.1| ras-related protein Rap-1A precursor [Homo sapiens]'	NaN	NaN	NaN	NaN	NaN	1	NaN	NaN	1	1
1162	'>gi|63252886|ref|NP_000908.2| prolyl 4-hydroxylase subunit alpha-1 isoform 1 precursor [Homo sapiens]'	NaN	NaN	NaN	NaN	1	NaN	NaN	NaN	1	1
1163	'>gi|656985045|ref|NP_001280627.1| septin-9 isoform f [Homo sapiens]'	NaN	NaN	NaN	1	NaN	NaN	NaN	NaN	1	1
1164	'>gi|663071018|ref|NP_001284578.1| CD81 antigen isoform 2 [Homo sapiens]'	NaN	NaN	NaN	NaN	NaN	NaN	NaN	1	1	1
1165	'>gi|663856781|ref|NP_001287727.1| septin-8 isoform e [Homo sapiens]'	NaN	NaN	NaN	1	NaN	NaN	NaN	NaN	1	1
1166	'>gi|66737372|ref|NP_001019383.1| protein S100-A13 [Homo sapiens]'	NaN	NaN	NaN	NaN	NaN	NaN	NaN	1	1	1
1167	'>gi|6912432|ref|NP_036407.1| interleukin-36 receptor antagonist protein [Homo sapiens]'	NaN	NaN	NaN	1	NaN	NaN	NaN	NaN	1	1
1168	'>gi|74315356|ref|NP_037408.2| sedoheptulokinase [Homo sapiens]'	1	NaN	NaN	NaN	NaN	NaN	NaN	NaN	1	1
1169	'>gi|7661910|ref|NP_055488.1| ER membrane protein complex subunit 2 [Homo sapiens]'	NaN	NaN	NaN	NaN	NaN	1	NaN	NaN	1	1
1170	'>gi|7662078|ref|NP_055454.1| tetratricopeptide repeat protein 37 [Homo sapiens]'	NaN	NaN	1	NaN	NaN	NaN	NaN	NaN	1	1
1171	'>gi|7705636|ref|NP_057156.1| vesicle transport protein GOT1B [Homo sapiens]'	NaN	NaN	NaN	NaN	NaN	NaN	NaN	1	1	1
1172	'>gi|83921614|ref|NP_085056.2| cytochrome b5 type B [Homo sapiens]'	NaN	NaN	NaN	NaN	NaN	NaN	1	NaN	1	1
1173	'>gi|88759348|ref|NP_078822.3| RING finger protein 219 [Homo sapiens]'	NaN	NaN	NaN	NaN	1	NaN	NaN	NaN	1	1
1174	'>gi|96975135|ref|NP_570137.2| ras-related protein Rab-24 [Homo sapiens]'	NaN	NaN	NaN	NaN	NaN	NaN	1	NaN	1	1

## Sheet: Local
Number	Protein Name	Cep89_01	Cep89_02	Cep89_03	Cep89_04	Cep89_05	Cep89_06	Cep89_07	Cep89_08	MAX	SUM
1	'>gi|47132620|ref|NP_000414.2| keratin, type II cytoskeletal 2 epidermal [Homo sapiens]'	1285	537	340	274	287	269	280	449	1285	3721
2	'>gi|195972866|ref|NP_000412.3| keratin, type I cytoskeletal 10 [Homo sapiens]'	1104	655	NaN	1	868	696	505	363	1104	4192
3	'>gi|119395750|ref|NP_006112.3| keratin, type II cytoskeletal 1 [Homo sapiens]'	830	584	487	523	840	491	18	367	840	4140
4	'>gi|50083293|ref|NP_116205.3| centrosomal protein of 89 kDa [Homo sapiens]'	49	132	357	833	559	291	148	60	833	2429
5	'>gi|530412176|ref|XP_005257400.1| PREDICTED: keratin, type I cytoskeletal 10 isoform X1 [Homo sapiens]'	NaN	NaN	547	568	NaN	NaN	NaN	1	568	1116
6	'>sp|K2C1_HUMAN|(Common contaminant protein)'	5	1	NaN	NaN	NaN	NaN	453	NaN	453	459
7	'>gi|5803225|ref|NP_006752.1| 14-3-3 protein epsilon [Homo sapiens]'	NaN	2	19	6	83	439	358	63	439	970
8	'>sp|TRYP_PIG|(Common contaminant protein)'	168	261	244	153	169	184	182	205	261	1566
9	'>gi|55956899|ref|NP_000217.2| keratin, type I cytoskeletal 9 [Homo sapiens]'	181	204	108	188	126	220	143	52	220	1222
10	'>gi|58530840|ref|NP_004406.2| desmoplakin isoform I [Homo sapiens]'	159	40	NaN	186	121	NaN	51	NaN	186	557
11	'>gi|12667788|ref|NP_002464.1| myosin-9 [Homo sapiens]'	4	182	102	50	2	NaN	NaN	NaN	182	340
12	'>gi|530389315|ref|XP_005251117.1| PREDICTED: 14-3-3 protein zeta/delta isoform X1 [Homo sapiens]'	3	2	NaN	14	33	180	6	26	180	264
13	'>gi|208973244|ref|NP_001129174.1| 14-3-3 protein zeta/delta [Homo sapiens]'	NaN	NaN	4	NaN	NaN	7	177	NaN	177	188
14	'>Reverse >gi|154240671|ref|NP_775760.3| maestro heat-like repeat-containing protein family member 2B [Homo sapiens]'	73	131	112	111	148	160	149	173	173	1057
15	'>gi|57013276|ref|NP_006073.2| tubulin alpha-1B chain [Homo sapiens]'	NaN	NaN	NaN	NaN	167	51	16	NaN	167	234
16	'>gi|29788785|ref|NP_821133.1| tubulin beta chain isoform b [Homo sapiens]'	NaN	NaN	9	1	160	35	29	18	160	252
17	'>gi|160420317|ref|NP_001104026.1| filamin-A isoform 2 [Homo sapiens]'	8	154	12	13	NaN	NaN	NaN	NaN	154	187
18	'>gi|61743954|ref|NP_001611.1| neuroblast differentiation-associated protein AHNAK isoform 1 [Homo sapiens]'	103	134	77	78	24	NaN	NaN	NaN	134	416
19	'>gi|21464101|ref|NP_036611.2| 14-3-3 protein gamma [Homo sapiens]'	NaN	18	8	12	22	132	131	9	132	332
20	'>gi|4507951|ref|NP_003396.1| 14-3-3 protein eta [Homo sapiens]'	NaN	4	5	7	24	105	132	11	132	288
21	'>gi|15431310|ref|NP_000517.2| keratin, type I cytoskeletal 14 [Homo sapiens]'	109	61	57	97	127	71	85	22	127	629
22	'>gi|19718759|ref|NP_579899.1| myoferlin isoform b [Homo sapiens]'	NaN	114	72	NaN	6	NaN	NaN	NaN	114	192
23	'>gi|119703753|ref|NP_005546.2| keratin, type II cytoskeletal 6B [Homo sapiens]'	46	51	34	58	110	25	65	25	110	414
24	'>gi|116805322|ref|NP_001449.3| filamin-C isoform a [Homo sapiens]'	NaN	107	NaN	NaN	NaN	NaN	NaN	NaN	107	107
25	'>gi|62122917|ref|NP_001014364.1| filaggrin-2 [Homo sapiens]'	53	3	4	20	39	15	25	105	105	264
26	'>gi|17738308|ref|NP_055101.2| neuronal calcium sensor 1 isoform 1 [Homo sapiens]'	NaN	NaN	NaN	NaN	7	21	102	18	102	148
27	'>gi|119395754|ref|NP_000415.2| keratin, type II cytoskeletal 5 [Homo sapiens]'	71	44	49	79	96	89	53	54	96	535
28	'>gi|42822864|ref|NP_976322.1| ribonuclease inhibitor [Homo sapiens]'	NaN	NaN	NaN	4	83	33	NaN	NaN	83	120
29	'>gi|5803227|ref|NP_006817.1| 14-3-3 protein theta [Homo sapiens]'	NaN	5	2	1	17	76	67	5	76	173
30	'>gi|544063468|ref|NP_001269555.1| lamin isoform A-delta50 [Homo sapiens]'	NaN	NaN	NaN	71	13	1	1	NaN	71	86
31	'>gi|60097902|ref|NP_002007.1| filaggrin [Homo sapiens]'	14	NaN	NaN	69	10	NaN	4	6	69	103
32	'>gi|4506787|ref|NP_003861.1| ras GTPase-activating-like protein IQGAP1 [Homo sapiens]'	NaN	18	69	15	NaN	NaN	NaN	NaN	69	102
33	'>gi|16933542|ref|NP_002017.1| fibronectin isoform 3 preproprotein [Homo sapiens]'	NaN	68	1	NaN	NaN	NaN	NaN	NaN	68	69
34	'>gi|12025678|ref|NP_004915.2| alpha-actinin-4 [Homo sapiens]'	NaN	NaN	3	65	3	NaN	NaN	NaN	65	71
35	'>gi|115527082|ref|NP_005954.3| myosin-1 [Homo sapiens]'	4	64	NaN	NaN	NaN	NaN	NaN	NaN	64	68
36	'>gi|568815719|ref|NP_001275582.1| clathrin heavy chain 1 isoform 2 [Homo sapiens]'	NaN	15	61	1	NaN	NaN	NaN	NaN	61	77
37	'>gi|223029410|ref|NP_006280.3| talin-1 [Homo sapiens]'	NaN	61	NaN	NaN	NaN	NaN	NaN	NaN	61	61
38	'>gi|4507949|ref|NP_003395.1| 14-3-3 protein beta/alpha [Homo sapiens]'	NaN	NaN	NaN	NaN	NaN	61	NaN	NaN	61	61
39	'>gi|24430192|ref|NP_005548.2| keratin, type I cytoskeletal 16 [Homo sapiens]'	25	18	9	40	60	20	29	5	60	206
40	'''>gi|76496475|ref|NP_001029031.1| very long-chain specific acyl-CoA dehydrogenase, mitochondrial isoform 2 precursor [Homo sapien...'' <Preview truncated at 128 characters>'	NaN	NaN	NaN	NaN	60	NaN	NaN	NaN	60	60
41	'>gi|224809474|ref|NP_001138994.1| ankycorbin isoform b [Homo sapiens]'	NaN	NaN	39	59	NaN	NaN	NaN	NaN	59	98
42	'>gi|578821405|ref|XP_006718611.1| PREDICTED: solute carrier family 22 member 10 isoform X6 [Homo sapiens]'	NaN	57	58	NaN	NaN	NaN	NaN	29	58	144
43	'>gi|4506773|ref|NP_002956.1| protein S100-A9 [Homo sapiens]'	6	4	7	41	57	32	47	46	57	240
44	'>gi|5902072|ref|NP_008850.1| serpin B3 [Homo sapiens]'	NaN	8	10	57	43	56	21	18	57	213
45	'>gi|119703744|ref|NP_001933.2| desmoglein-1 preproprotein [Homo sapiens]'	54	33	28	35	53	19	16	6	54	244
46	'>gi|33350932|ref|NP_001367.2| cytoplasmic dynein 1 heavy chain 1 [Homo sapiens]'	54	32	NaN	NaN	NaN	NaN	NaN	NaN	54	86
47	'>gi|21328448|ref|NP_647539.1| 14-3-3 protein beta/alpha [Homo sapiens]'	1	1	2	4	11	1	54	1	54	75
48	'>gi|45439327|ref|NP_002696.3| periplakin [Homo sapiens]'	3	NaN	3	54	NaN	NaN	NaN	NaN	54	60
49	'>gi|533112491|ref|NP_001269210.1| pyrroline-5-carboxylate reductase 1, mitochondrial isoform 5 [Homo sapiens]'	NaN	NaN	NaN	NaN	3	54	NaN	NaN	54	57
50	'>gi|4501887|ref|NP_001605.1| actin, cytoplasmic 2 [Homo sapiens]'	13	10	14	53	NaN	NaN	13	12	53	115
51	'>gi|578830876|ref|XP_006721941.1| PREDICTED: junction plakoglobin isoform X9 [Homo sapiens]'	NaN	NaN	NaN	NaN	53	NaN	NaN	NaN	53	53
52	'>gi|41322919|ref|NP_958784.1| plectin isoform 1b [Homo sapiens]'	15	1	NaN	52	3	NaN	NaN	NaN	52	71
53	'>gi|19920317|ref|NP_006816.2| cytoskeleton-associated protein 4 [Homo sapiens]'	NaN	NaN	5	13	49	NaN	NaN	NaN	49	67
54	'>gi|194018511|ref|NP_778253.2| keratin, type II cytoskeletal 1b [Homo sapiens]'	48	18	6	6	28	7	17	14	48	144
55	'>gi|5454052|ref|NP_006133.1| 14-3-3 protein sigma [Homo sapiens]'	7	1	2	48	4	6	13	6	48	87
56	'>gi|54607014|ref|NP_002527.1| TBC1 domain family member 25 [Homo sapiens]'	NaN	NaN	NaN	NaN	NaN	42	47	43	47	132
57	'>gi|58530842|ref|NP_001008844.1| desmoplakin isoform II [Homo sapiens]'	NaN	NaN	16	NaN	2	47	NaN	24	47	89
58	'>gi|4557032|ref|NP_002291.1| L-lactate dehydrogenase B chain [Homo sapiens]'	7	12	16	21	45	34	29	6	45	170
59	'>gi|154146191|ref|NP_005339.3| heat shock protein HSP 90-alpha isoform 2 [Homo sapiens]'	NaN	5	11	45	5	NaN	NaN	NaN	45	66
60	'>gi|21614544|ref|NP_002955.2| protein S100-A8 [Homo sapiens]'	4	4	6	17	18	16	22	44	44	131
61	'>gi|578821403|ref|XP_006718610.1| PREDICTED: solute carrier family 22 member 10 isoform X5 [Homo sapiens]'	NaN	NaN	NaN	32	NaN	44	NaN	NaN	44	76
62	'>gi|118601070|ref|NP_981953.2| protein FAM47A [Homo sapiens]'	22	32	43	41	36	20	35	27	43	256
63	'>gi|88501740|ref|NP_008963.3| TRIO and F-actin-binding protein isoform 1 [Homo sapiens]'	NaN	NaN	NaN	NaN	43	NaN	NaN	NaN	43	43
64	'>gi|50845388|ref|NP_001002858.1| annexin A2 isoform 1 [Homo sapiens]'	30	9	7	37	NaN	42	18	23	42	166
65	'>gi|5729877|ref|NP_006588.1| heat shock cognate 71 kDa protein isoform 1 [Homo sapiens]'	NaN	NaN	NaN	42	NaN	NaN	NaN	NaN	42	42
66	'>gi|223278387|ref|NP_059118.2| calmodulin-like protein 5 [Homo sapiens]'	6	8	12	40	16	12	11	10	40	115
67	'>gi|115298657|ref|NP_002954.2| protein S100-A7 [Homo sapiens]'	7	4	1	NaN	NaN	NaN	1	40	40	53
68	'>gi|155969707|ref|NP_004960.2| insulin-degrading enzyme isoform 1 [Homo sapiens]'	2	NaN	3	33	39	NaN	NaN	NaN	39	77
69	'>gi|62414289|ref|NP_003371.2| vimentin [Homo sapiens]'	NaN	NaN	NaN	NaN	38	2	NaN	NaN	38	40
70	'>gi|4503143|ref|NP_001900.1| cathepsin D preproprotein [Homo sapiens]'	26	8	6	21	20	36	32	19	36	168
71	'>gi|15618995|ref|NP_258259.1| keratin, type II cytoskeletal 71 [Homo sapiens]'	36	30	NaN	24	NaN	2	27	19	36	138
72	'>gi|4504811|ref|NP_002221.1| junction plakoglobin [Homo sapiens]'	34	8	8	36	NaN	NaN	32	13	36	131
73	'>gi|19743813|ref|NP_002202.2| integrin beta-1 isoform 1A precursor [Homo sapiens]'	NaN	3	32	36	NaN	NaN	NaN	NaN	36	71
74	'>P00366|DHE3_BOVIN Glutamate dehydrogenase 1, mitochondrial - Bos taurus (Bovine).(Common contaminant protein)'	NaN	NaN	27	35	31	NaN	NaN	NaN	35	93
75	'>gi|6005942|ref|NP_009057.1| transitional endoplasmic reticulum ATPase [Homo sapiens]'	NaN	NaN	NaN	35	1	NaN	NaN	NaN	35	36
76	'>gi|444909176|ref|NP_001263303.1| WD repeat-containing protein 38 isoform 1 [Homo sapiens]'	8	25	22	17	33	30	31	34	34	200
77	'>gi|530369054|ref|XP_005263656.1| PREDICTED: tubulin--tyrosine ligase isoform X1 [Homo sapiens]'	8	25	22	17	32	29	30	34	34	197
78	'>gi|4501885|ref|NP_001092.1| actin, cytoplasmic 1 [Homo sapiens]'	NaN	NaN	NaN	NaN	34	28	NaN	NaN	34	62
79	'>gi|4757756|ref|NP_004030.1| annexin A2 isoform 2 [Homo sapiens]'	NaN	NaN	NaN	NaN	34	NaN	NaN	NaN	34	34
80	'>gi|4504985|ref|NP_002298.1| galectin-7 [Homo sapiens]'	6	2	4	32	8	10	16	24	32	102
81	'>gi|5032009|ref|NP_005600.1| glycogen phosphorylase, muscle form isoform 1 [Homo sapiens]'	NaN	6	26	32	NaN	NaN	NaN	NaN	32	64
82	'>gi|16751921|ref|NP_444513.1| dermcidin isoform 1 preproprotein [Homo sapiens]'	22	31	14	22	12	18	27	18	31	164
83	'>gi|89357932|ref|NP_775487.2| keratin, type II cytoskeletal 78 isoform 1 [Homo sapiens]'	31	11	4	6	22	5	7	4	31	90
84	'>gi|4507877|ref|NP_003364.1| vinculin isoform VCL [Homo sapiens]'	6	9	31	13	1	NaN	NaN	NaN	31	60
85	'>gi|53729346|ref|NP_000290.2| plakophilin-1 isoform 1b [Homo sapiens]'	NaN	NaN	NaN	31	9	NaN	NaN	NaN	31	40
86	'>gi|393715091|ref|NP_001257328.1| tubulin alpha-1A chain isoform 1 [Homo sapiens]'	NaN	NaN	NaN	NaN	31	NaN	NaN	NaN	31	31
87	'>gi|530402379|ref|XP_005266453.1| PREDICTED: LIM domain only protein 7 isoform X22 [Homo sapiens]'	NaN	NaN	30	NaN	NaN	NaN	NaN	NaN	30	30
88	'>gi|576583524|ref|NP_001276675.1| glyceraldehyde-3-phosphate dehydrogenase isoform 1 [Homo sapiens]'	17	9	9	29	29	28	21	15	29	157
89	'>gi|4507475|ref|NP_000350.1| protein-glutamine gamma-glutamyltransferase K [Homo sapiens]'	11	NaN	NaN	NaN	29	10	11	3	29	64
90	'>gi|213511508|ref|NP_001132929.1| B-cell receptor-associated protein 31 isoform a [Homo sapiens]'	NaN	NaN	NaN	9	NaN	17	29	NaN	29	55
91	'>gi|4503571|ref|NP_001419.1| alpha-enolase isoform 1 [Homo sapiens]'	NaN	NaN	1	29	11	5	7	NaN	29	53
92	'>gi|4758988|ref|NP_004152.1| ras-related protein Rab-1A isoform 1 [Homo sapiens]'	NaN	NaN	NaN	NaN	3	11	29	2	29	45
93	'>gi|530412116|ref|XP_005257370.1| PREDICTED: junction plakoglobin isoform X1 [Homo sapiens]'	NaN	NaN	NaN	NaN	NaN	29	NaN	NaN	29	29
94	'>gi|6912286|ref|NP_036246.1| caspase-14 precursor [Homo sapiens]'	16	8	8	25	20	24	26	28	28	155
95	'>gi|578835525|ref|XP_006723678.1| PREDICTED: protein-glutamine gamma-glutamyltransferase E isoform X1 [Homo sapiens]'	NaN	10	11	20	23	13	28	16	28	121
96	'>gi|19923231|ref|NP_002860.2| ras-related protein Rab-6A isoform a [Homo sapiens]'	NaN	NaN	NaN	NaN	NaN	NaN	28	NaN	28	28
97	'>Reverse >gi|401709935|ref|NP_001257906.1| IST1 homolog isoform d [Homo sapiens]'	4	4	6	22	18	25	25	27	27	131
98	'>gi|156104874|ref|NP_001979.2| envoplakin [Homo sapiens]'	NaN	NaN	NaN	27	NaN	NaN	NaN	NaN	27	27
99	'>gi|21361454|ref|NP_037460.2| pyrroline-5-carboxylate reductase 2 isoform 1 [Homo sapiens]'	NaN	NaN	NaN	NaN	NaN	27	NaN	NaN	27	27
100	'>gi|354983493|ref|NP_001238978.1| protein-L-isoaspartate(D-aspartate) O-methyltransferase isoform 2 [Homo sapiens]'	NaN	NaN	NaN	NaN	NaN	NaN	27	NaN	27	27
101	'>Reverse >gi|45643131|ref|NP_996668.1| protein OSCP1 isoform 2 [Homo sapiens]'	NaN	20	26	NaN	NaN	NaN	22	15	26	83
102	'>Reverse >gi|167234419|ref|NP_005110.2| thyroid hormone receptor-associated protein 3 [Homo sapiens]'	NaN	NaN	NaN	NaN	NaN	26	24	NaN	26	50
103	'>gi|56090582|ref|NP_001007562.1| immunity-related GTPase family Q protein [Homo sapiens]'	NaN	NaN	14	NaN	26	NaN	NaN	NaN	26	40
104	'>gi|334191701|ref|NP_001229268.1| ATP-dependent 6-phosphofructokinase, platelet type isoform 2 [Homo sapiens]'	NaN	NaN	NaN	8	26	NaN	NaN	NaN	26	34
105	'>gi|530365262|ref|XP_005245488.1| PREDICTED: protein S100-A7 isoform X1 [Homo sapiens]'	NaN	NaN	NaN	25	17	25	21	3	25	91
106	'>gi|110611220|ref|NP_004578.2| ribosome-binding protein 1 [Homo sapiens]'	NaN	10	25	2	NaN	NaN	NaN	NaN	25	37
107	'>gi|574584816|ref|NP_001276058.1| tubulin beta-4A chain isoform 3 [Homo sapiens]'	NaN	NaN	NaN	NaN	25	NaN	NaN	NaN	25	25
108	'>gi|223468597|ref|NP_001138472.1| integrin alpha-V isoform 3 precursor [Homo sapiens]'	NaN	NaN	24	7	NaN	3	2	NaN	24	36
109	'>gi|189458821|ref|NP_003236.3| protein-glutamine gamma-glutamyltransferase E [Homo sapiens]'	24	NaN	NaN	NaN	NaN	NaN	NaN	NaN	24	24
110	'>gi|57864582|ref|NP_001009931.1| hornerin [Homo sapiens]'	13	18	15	23	5	16	14	3	23	107
111	'>gi|13435361|ref|NP_077739.1| desmocollin-1 isoform Dsc1a preproprotein [Homo sapiens]'	23	16	NaN	15	18	8	9	4	23	93
112	'>gi|16507237|ref|NP_005338.1| 78 kDa glucose-regulated protein precursor [Homo sapiens]'	NaN	NaN	NaN	23	4	NaN	NaN	NaN	23	27
113	'>Reverse >gi|481026589|ref|NP_001264747.1| YTH domain-containing family protein 3 isoform c [Homo sapiens]'	NaN	NaN	NaN	NaN	23	NaN	NaN	NaN	23	23
114	'>gi|88702793|ref|NP_612449.2| vasorin precursor [Homo sapiens]'	NaN	21	21	18	NaN	NaN	22	20	22	102
115	'>gi|4503471|ref|NP_001393.1| elongation factor 1-alpha 1 [Homo sapiens]'	NaN	4	8	17	22	10	8	8	22	77
116	'>gi|68563515|ref|NP_001020402.1| keratinocyte proline-rich protein [Homo sapiens]'	17	NaN	NaN	NaN	22	2	NaN	10	22	51
117	'>gi|31559829|ref|NP_853512.1| keratin, type I cytoskeletal 25 [Homo sapiens]'	7	22	3	3	2	NaN	NaN	NaN	22	37
118	'>gi|167466173|ref|NP_005337.2| heat shock 70 kDa protein 1A/1B [Homo sapiens]'	NaN	NaN	NaN	22	4	2	NaN	5	22	33
119	'>gi|190358517|ref|NP_004209.2| ras-related protein Rab-11B [Homo sapiens]'	NaN	NaN	NaN	NaN	NaN	5	22	NaN	22	27
120	'>gi|223718053|ref|NP_001138771.1| exocyst complex component 7 isoform 6 [Homo sapiens]'	NaN	NaN	NaN	NaN	22	NaN	NaN	NaN	22	22
121	'>gi|6006011|ref|NP_005492.1| integrin alpha-3 isoform b precursor [Homo sapiens]'	NaN	NaN	22	NaN	NaN	NaN	NaN	NaN	22	22
122	'>gi|431822408|ref|NP_001258901.1| heat shock protein HSP 90-beta isoform c [Homo sapiens]'	NaN	NaN	4	21	21	2	4	3	21	55
123	'>gi|44888833|ref|NP_056508.2| protein inturned [Homo sapiens]'	NaN	NaN	20	NaN	NaN	13	NaN	21	21	54
124	'>gi|37595530|ref|NP_004418.2| polyhomeotic-like protein 2 isoform b [Homo sapiens]'	NaN	17	21	NaN	NaN	NaN	15	NaN	21	53
125	'>gi|4757952|ref|NP_001782.1| cell division control protein 42 homolog isoform 1 precursor [Homo sapiens]'	NaN	NaN	NaN	NaN	NaN	NaN	21	NaN	21	21
126	'>gi|525507390|ref|NP_112598.3| epiplakin [Homo sapiens]'	NaN	NaN	NaN	20	NaN	7	8	6	20	41
127	'>gi|32189394|ref|NP_001677.2| ATP synthase subunit beta, mitochondrial precursor [Homo sapiens]'	NaN	NaN	NaN	20	17	NaN	NaN	NaN	20	37
128	'>gi|530373444|ref|XP_005265665.1| PREDICTED: ectonucleoside triphosphate diphosphohydrolase 3 isoform X4 [Homo sapiens]'	NaN	14	NaN	20	NaN	NaN	NaN	NaN	20	34
129	'>gi|42734430|ref|NP_036364.2| polymerase I and transcript release factor [Homo sapiens]'	NaN	NaN	NaN	NaN	20	6	NaN	NaN	20	26
130	'>gi|21396489|ref|NP_004784.2| lon protease homolog, mitochondrial isoform 1 precursor [Homo sapiens]'	NaN	NaN	5	20	NaN	NaN	NaN	NaN	20	25
131	'>gi|4506675|ref|NP_002941.1| dolichyl-diphosphooligosaccharide--protein glycosyltransferase subunit 1 precursor [Homo sapiens]'	NaN	NaN	NaN	3	20	NaN	NaN	NaN	20	23
132	'>gi|530412188|ref|XP_005257406.1| PREDICTED: keratin, type I cytoskeletal 17 isoform X1 [Homo sapiens]'	NaN	NaN	NaN	NaN	20	NaN	NaN	NaN	20	20
133	'>sp|ALBU_BOVIN|(Common contaminant protein)'	3	11	14	19	13	NaN	NaN	NaN	19	60
134	'>gi|346986435|ref|NP_001231367.1| arginase-1 isoform 1 [Homo sapiens]'	19	6	3	8	9	4	7	3	19	59
135	'>gi|4757810|ref|NP_004037.1| ATP synthase subunit alpha, mitochondrial isoform a precursor [Homo sapiens]'	NaN	NaN	NaN	12	19	NaN	NaN	NaN	19	31
136	'>gi|14389309|ref|NP_116093.1| tubulin alpha-1C chain [Homo sapiens]'	NaN	NaN	8	19	3	NaN	NaN	NaN	19	30
137	'>gi|153945728|ref|NP_005900.2| microtubule-associated protein 1B [Homo sapiens]'	NaN	19	NaN	NaN	3	6	NaN	NaN	19	28
138	'>gi|354983501|ref|NP_001238982.1| protein-L-isoaspartate(D-aspartate) O-methyltransferase isoform 1 [Homo sapiens]'	NaN	NaN	NaN	NaN	NaN	19	NaN	NaN	19	19
139	'>gi|578837531|ref|XP_006724440.1| PREDICTED: PRKCA-binding protein isoform X1 [Homo sapiens]'	NaN	NaN	NaN	NaN	19	NaN	NaN	NaN	19	19
140	'>gi|305632781|ref|NP_061886.2| protein FAM64A isoform 1 [Homo sapiens]'	NaN	NaN	3	4	NaN	18	12	NaN	18	37
141	'>gi|148596936|ref|NP_060372.2| hypoxia-inducible factor 1-alpha inhibitor [Homo sapiens]'	NaN	NaN	18	NaN	8	10	NaN	NaN	18	36
142	'>gi|51477721|ref|NP_001003811.1| testis-expressed sequence 11 protein isoform 1 [Homo sapiens]'	NaN	NaN	18	NaN	NaN	NaN	NaN	16	18	34
143	'>gi|148612803|ref|NP_778223.2| keratin, type II cytoskeletal 74 [Homo sapiens]'	NaN	NaN	11	NaN	18	NaN	NaN	NaN	18	29
144	'>gi|380837121|ref|NP_004883.3| vesicle-trafficking protein SEC22b precursor [Homo sapiens]'	NaN	NaN	NaN	NaN	NaN	7	18	2	18	27
145	'>gi|195976821|ref|NP_001123927.1| dysferlin isoform 2 [Homo sapiens]'	NaN	18	2	NaN	NaN	NaN	NaN	NaN	18	20
146	'>gi|126032350|ref|NP_001075109.1| DNA-dependent protein kinase catalytic subunit isoform 2 [Homo sapiens]'	NaN	18	NaN	NaN	NaN	NaN	NaN	NaN	18	18
147	'>gi|148536855|ref|NP_001091868.1| coatomer subunit alpha isoform 1 [Homo sapiens]'	NaN	NaN	18	NaN	NaN	NaN	NaN	NaN	18	18
148	'>gi|17402909|ref|NP_036233.2| tripartite motif-containing protein 29 [Homo sapiens]'	NaN	NaN	NaN	18	NaN	NaN	NaN	NaN	18	18
149	'>gi|384475528|ref|NP_001244958.1| gelsolin isoform d [Homo sapiens]'	NaN	NaN	NaN	18	NaN	NaN	NaN	NaN	18	18
150	'>gi|40805864|ref|NP_955392.1| tumor protein D54 isoform a [Homo sapiens]'	NaN	NaN	NaN	NaN	NaN	18	NaN	NaN	18	18
151	'>gi|5031839|ref|NP_005545.1| keratin, type II cytoskeletal 6A [Homo sapiens]'	6	5	6	7	17	8	8	NaN	17	57
152	'>gi|125628636|ref|NP_872313.2| keratin, type II cytoskeletal 80 isoform K80 [Homo sapiens]'	17	3	4	10	13	3	5	1	17	56
153	'>gi|332164781|ref|NP_001193728.1| pyruvate kinase PKM isoform f [Homo sapiens]'	7	NaN	NaN	17	11	2	NaN	2	17	39
154	'>gi|156766050|ref|NP_612429.2| protein AHNAK2 [Homo sapiens]'	3	17	7	NaN	NaN	NaN	NaN	NaN	17	27
155	'>gi|56237029|ref|NP_002196.2| integrin alpha-5 precursor [Homo sapiens]'	NaN	NaN	17	NaN	NaN	NaN	5	4	17	26
156	'>gi|62241042|ref|NP_004437.2| bifunctional glutamate/proline--tRNA ligase [Homo sapiens]'	NaN	NaN	17	2	NaN	NaN	NaN	NaN	17	19
157	'>gi|224586815|ref|NP_001139138.1| Golgi apparatus protein 1 isoform 2 precursor [Homo sapiens]'	NaN	NaN	17	NaN	NaN	NaN	NaN	NaN	17	17
158	'''>gi|351542238|ref|NP_001234925.1| arf-GAP with SH3 domain, ANK repeat and PH domain-containing protein 1 isoform 2 [Homo sapiens...'' <Preview truncated at 128 characters>'	NaN	NaN	17	NaN	NaN	NaN	NaN	NaN	17	17
159	'>gi|4506365|ref|NP_002856.1| ras-related protein Rab-2A isoform a [Homo sapiens]'	NaN	NaN	NaN	NaN	NaN	NaN	17	NaN	17	17
160	'>gi|45827806|ref|NP_056274.3| atlastin-3 isoform 1 [Homo sapiens]'	NaN	NaN	NaN	NaN	17	NaN	NaN	NaN	17	17
161	'>gi|4504517|ref|NP_001531.1| heat shock protein beta-1 [Homo sapiens]'	NaN	NaN	5	16	5	12	16	5	16	59
162	'>Reverse >gi|322302755|ref|NP_001189788.1| SHC-transforming protein 1 isoform 5 precursor [Homo sapiens]'	NaN	NaN	10	8	NaN	6	16	10	16	50
163	'>gi|24431935|ref|NP_065393.1| reticulon-4 isoform A [Homo sapiens]'	NaN	NaN	NaN	1	16	8	NaN	2	16	27
164	'>gi|260436922|ref|NP_001159506.1| suprabasin isoform 1 precursor [Homo sapiens]'	4	NaN	NaN	16	3	NaN	NaN	NaN	16	23
165	'>gi|32567786|ref|NP_787028.1| keratin, type II cytoskeletal 79 [Homo sapiens]'	4	NaN	NaN	NaN	16	NaN	NaN	NaN	16	20
166	'>gi|4504919|ref|NP_002264.1| keratin, type II cytoskeletal 8 isoform 2 [Homo sapiens]'	NaN	NaN	NaN	NaN	16	3	NaN	NaN	16	19
167	'>gi|4885111|ref|NP_005176.1| calmodulin-like protein 3 [Homo sapiens]'	NaN	1	NaN	16	1	1	NaN	NaN	16	19
168	'>gi|402478633|ref|NP_001257943.1| kinectin isoform d [Homo sapiens]'	NaN	NaN	16	NaN	NaN	NaN	NaN	NaN	16	16
169	'>gi|4502337|ref|NP_001176.1| zinc-alpha-2-glycoprotein precursor [Homo sapiens]'	11	15	12	11	12	9	8	4	15	82
170	'>gi|320461711|ref|NP_001189360.1| peroxiredoxin-1 [Homo sapiens]'	6	NaN	NaN	15	10	6	12	14	15	63
171	'>gi|28076869|ref|NP_002965.1| serpin B4 isoform 1 [Homo sapiens]'	5	2	2	15	14	13	3	4	15	58
172	'>gi|633257734|ref|NP_001278870.1| uncharacterized protein C3orf14 isoform a [Homo sapiens]'	NaN	NaN	NaN	NaN	NaN	2	11	15	15	28
173	'>Reverse >gi|148229134|ref|NP_057710.3| RNA-binding E3 ubiquitin-protein ligase MEX3C [Homo sapiens]'	NaN	NaN	NaN	NaN	11	NaN	NaN	15	15	26
174	'>gi|4758648|ref|NP_004512.1| kinesin-1 heavy chain [Homo sapiens]'	NaN	NaN	6	15	NaN	NaN	NaN	NaN	15	21
175	'>gi|60499025|ref|NP_001012533.1| ferrochelatase, mitochondrial isoform a precursor [Homo sapiens]'	NaN	NaN	NaN	NaN	5	15	NaN	NaN	15	20
176	'>gi|20070125|ref|NP_000909.2| protein disulfide-isomerase precursor [Homo sapiens]'	NaN	NaN	NaN	15	4	NaN	NaN	NaN	15	19
177	'>gi|24308201|ref|NP_065392.1| adipocyte plasma membrane-associated protein [Homo sapiens]'	NaN	NaN	NaN	NaN	15	3	NaN	NaN	15	18
178	'>gi|4503327|ref|NP_000389.1| NADH-cytochrome b5 reductase 3 isoform 1 [Homo sapiens]'	NaN	NaN	NaN	NaN	NaN	15	3	NaN	15	18
179	'>gi|34147513|ref|NP_004628.4| ras-related protein Rab-7a [Homo sapiens]'	NaN	NaN	NaN	1	NaN	NaN	15	NaN	15	16
180	'>gi|19557691|ref|NP_149351.1| surfeit locus protein 4 isoform 1 [Homo sapiens]'	NaN	NaN	NaN	NaN	NaN	NaN	15	NaN	15	15
181	'>gi|41399285|ref|NP_955472.1| 60 kDa heat shock protein, mitochondrial [Homo sapiens]'	NaN	NaN	NaN	NaN	15	NaN	NaN	NaN	15	15
182	'>gi|48255957|ref|NP_001675.3| plasma membrane calcium-transporting ATPase 4 isoform 4b [Homo sapiens]'	NaN	NaN	15	NaN	NaN	NaN	NaN	NaN	15	15
183	'>gi|4826702|ref|NP_004939.1| desmocollin-1 isoform Dsc1b preproprotein [Homo sapiens]'	NaN	NaN	15	NaN	NaN	NaN	NaN	NaN	15	15
184	'>gi|54607053|ref|NP_006827.1| translational activator GCN1 [Homo sapiens]'	NaN	15	NaN	NaN	NaN	NaN	NaN	NaN	15	15
185	'>gi|68051721|ref|NP_065843.3| neutral cholesterol ester hydrolase 1 isoform b [Homo sapiens]'	NaN	NaN	NaN	NaN	15	NaN	NaN	NaN	15	15
186	'>gi|32189392|ref|NP_005800.3| peroxiredoxin-2 [Homo sapiens]'	9	4	3	9	12	9	14	6	14	66
187	'>gi|193794853|ref|NP_079197.3| protein POF1B [Homo sapiens]'	9	NaN	NaN	11	14	4	NaN	NaN	14	38
188	'>gi|4502027|ref|NP_000468.1| serum albumin preproprotein [Homo sapiens]'	3	3	3	6	2	2	14	2	14	35
189	'>gi|1373325|gb|AAB08064.1| Enhanced Green Fluorescent Protein [Cloning vector pEGFP-N3](Common contaminant protein)'	NaN	NaN	14	3	NaN	2	7	NaN	14	26
190	'>gi|134142826|ref|NP_006188.3| pericentriolar material 1 protein [Homo sapiens]'	NaN	11	14	NaN	NaN	NaN	NaN	NaN	14	25
191	'>gi|66933005|ref|NP_001019820.1| calnexin precursor [Homo sapiens]'	NaN	NaN	3	7	14	NaN	NaN	NaN	14	24
192	'>gi|27894339|ref|NP_056330.3| keratin, type I cytoskeletal 23 isoform 1 [Homo sapiens]'	14	NaN	NaN	NaN	8	NaN	NaN	NaN	14	22
193	'>gi|4557305|ref|NP_000025.1| fructose-bisphosphate aldolase A isoform 1 [Homo sapiens]'	NaN	NaN	1	14	2	3	NaN	NaN	14	20
194	'>gi|24234686|ref|NP_694881.1| heat shock cognate 71 kDa protein isoform 2 [Homo sapiens]'	NaN	NaN	3	NaN	14	NaN	2	NaN	14	19
195	'>gi|578836330|ref|XP_006723981.1| PREDICTED: histone H2B type F-S-like [Homo sapiens]'	NaN	NaN	NaN	14	NaN	NaN	3	2	14	19
196	'>gi|134304853|ref|NP_004806.3| rho GTPase-activating protein 29 [Homo sapiens]'	NaN	NaN	14	2	1	NaN	NaN	NaN	14	17
197	'>gi|161702986|ref|NP_001104547.1| ezrin [Homo sapiens]'	NaN	NaN	NaN	14	NaN	NaN	NaN	NaN	14	14
198	'>gi|166795301|ref|NP_057381.3| prenylcysteine oxidase 1 precursor [Homo sapiens]'	NaN	NaN	NaN	NaN	14	NaN	NaN	NaN	14	14
199	'>gi|20127408|ref|NP_000173.2| trifunctional enzyme subunit alpha, mitochondrial precursor [Homo sapiens]'	NaN	NaN	NaN	NaN	14	NaN	NaN	NaN	14	14
200	'''>gi|209413738|ref|NP_001129243.1| dolichyl-diphosphooligosaccharide--protein glycosyltransferase subunit 2 isoform 2 precursor [...'' <Preview truncated at 128 characters>'	NaN	NaN	NaN	NaN	14	NaN	NaN	NaN	14	14
201	'>gi|27734709|ref|NP_775885.1| nodal modulator 2 isoform 2 precursor [Homo sapiens]'	NaN	NaN	14	NaN	NaN	NaN	NaN	NaN	14	14
202	'>gi|40354195|ref|NP_954657.1| keratin, type I cytoskeletal 18 [Homo sapiens]'	NaN	NaN	NaN	NaN	14	NaN	NaN	NaN	14	14
203	'>gi|567316172|ref|NP_001274528.1| THAP domain-containing protein 5 isoform 3 [Homo sapiens]'	9	13	13	11	2	13	6	10	13	77
204	'>gi|153945736|ref|NP_853515.2| keratin, type I cytoskeletal 27 [Homo sapiens]'	5	5	NaN	13	1	3	8	8	13	43
205	'>gi|197382472|ref|NP_001128119.1| actin filament-associated protein 1 isoform A [Homo sapiens]'	NaN	NaN	NaN	13	10	NaN	NaN	NaN	13	23
206	'>gi|10835049|ref|NP_001655.1| transforming protein RhoA precursor [Homo sapiens]'	NaN	NaN	NaN	NaN	NaN	4	13	4	13	21
207	'>gi|17986001|ref|NP_005505.2| major histocompatibility complex, class I, B precursor [Homo sapiens]'	NaN	NaN	NaN	NaN	5	13	NaN	NaN	13	18
208	'>gi|18379349|ref|NP_006364.2| synaptic vesicle membrane protein VAT-1 homolog [Homo sapiens]'	NaN	NaN	NaN	4	13	1	NaN	NaN	13	18
209	'>gi|28372503|ref|NP_542785.1| keratin, type II cytoskeletal 72 isoform 1 [Homo sapiens]'	3	1	NaN	1	NaN	13	NaN	NaN	13	18
210	'>gi|577019573|ref|NP_001276737.1| alpha-crystallin B chain [Homo sapiens]'	NaN	NaN	NaN	NaN	NaN	3	13	NaN	13	16
211	'>gi|167860126|ref|NP_002630.2| serpin B5 [Homo sapiens]'	NaN	NaN	NaN	13	NaN	NaN	NaN	NaN	13	13
212	'>gi|19913428|ref|NP_001684.2| V-type proton ATPase subunit B, brain isoform [Homo sapiens]'	NaN	NaN	NaN	NaN	13	NaN	NaN	NaN	13	13
213	'>gi|229093316|ref|NP_775813.2| putative phospholipase B-like 2 isoform 1 precursor [Homo sapiens]'	NaN	NaN	NaN	NaN	NaN	13	NaN	NaN	13	13
214	'>gi|296317244|ref|NP_001171725.1| extended synaptotagmin-1 isoform 1 [Homo sapiens]'	NaN	NaN	13	NaN	NaN	NaN	NaN	NaN	13	13
215	'>gi|4505763|ref|NP_000282.1| phosphoglycerate kinase 1 [Homo sapiens]'	NaN	NaN	NaN	13	NaN	NaN	NaN	NaN	13	13
216	'>gi|4507729|ref|NP_001060.1| tubulin beta-2A chain [Homo sapiens]'	NaN	NaN	NaN	NaN	13	NaN	NaN	NaN	13	13
217	'>gi|537544624|ref|NP_001269266.1| plastin-3 isoform 3 [Homo sapiens]'	NaN	NaN	NaN	13	NaN	NaN	NaN	NaN	13	13
218	'>gi|586798161|ref|NP_003706.2| general vesicular transport factor p115 isoform 2 [Homo sapiens]'	NaN	NaN	NaN	13	NaN	NaN	NaN	NaN	13	13
219	'>gi|156139141|ref|NP_001095841.1| FAD-dependent oxidoreductase domain-containing protein 2 precursor [Homo sapiens]'	NaN	7	7	NaN	12	NaN	NaN	12	12	38
220	'>gi|4504333|ref|NP_002099.1| histidine ammonia-lyase isoform 1 [Homo sapiens]'	7	NaN	1	NaN	12	5	4	3	12	32
221	'>gi|5031857|ref|NP_005557.1| L-lactate dehydrogenase A chain isoform 1 [Homo sapiens]'	NaN	NaN	NaN	12	4	8	2	6	12	32
222	'>gi|226529917|ref|NP_001152759.1| triosephosphate isomerase isoform 2 [Homo sapiens]'	4	NaN	NaN	12	NaN	5	6	1	12	28
223	'>gi|306966132|ref|NP_001182461.1| spectrin alpha chain, non-erythrocytic 1 isoform 3 [Homo sapiens]'	NaN	12	4	8	NaN	NaN	NaN	NaN	12	24
224	'>gi|5174735|ref|NP_006079.1| tubulin beta-4B chain [Homo sapiens]'	NaN	NaN	NaN	12	6	6	NaN	NaN	12	24
225	'>gi|4507879|ref|NP_003365.1| voltage-dependent anion-selective channel protein 1 [Homo sapiens]'	NaN	NaN	NaN	1	5	12	5	NaN	12	23
226	'>gi|74271845|ref|NP_653271.2| alpha-2-macroglobulin-like protein 1 isoform 1 precursor [Homo sapiens]'	NaN	NaN	NaN	12	5	NaN	NaN	5	12	22
227	'''>gi|206597522|ref|NP_001128663.1| arf-GAP with SH3 domain, ANK repeat and PH domain-containing protein 2 isoform b [Homo sapiens...'' <Preview truncated at 128 characters>'	NaN	NaN	NaN	NaN	NaN	12	7	NaN	12	19
228	'>gi|393715095|ref|NP_001257329.1| tubulin alpha-1A chain isoform 2 [Homo sapiens]'	2	3	NaN	NaN	NaN	1	NaN	12	12	18
229	'>gi|339639597|ref|NP_001229885.1| septin-7 isoform 3 [Homo sapiens]'	NaN	NaN	NaN	1	12	NaN	NaN	NaN	12	13
230	'>gi|4507677|ref|NP_003290.1| endoplasmin precursor [Homo sapiens]'	NaN	NaN	1	12	NaN	NaN	NaN	NaN	12	13
231	'>gi|19913424|ref|NP_001681.2| V-type proton ATPase catalytic subunit A [Homo sapiens]'	NaN	NaN	NaN	NaN	12	NaN	NaN	NaN	12	12
232	'>gi|237681109|ref|NP_001153705.1| sodium/potassium-transporting ATPase subunit alpha-1 isoform c [Homo sapiens]'	NaN	NaN	NaN	12	NaN	NaN	NaN	NaN	12	12
233	'>gi|301171467|ref|NP_001180345.1| ATP-dependent RNA helicase DDX3X isoform 2 [Homo sapiens]'	NaN	NaN	NaN	NaN	12	NaN	NaN	NaN	12	12
234	'>gi|354459354|ref|NP_001238850.1| ras-related protein Rap-1b isoform 3 [Homo sapiens]'	NaN	NaN	NaN	NaN	NaN	NaN	12	NaN	12	12
235	'>gi|5454158|ref|NP_006286.1| valine--tRNA ligase [Homo sapiens]'	NaN	NaN	12	NaN	NaN	NaN	NaN	NaN	12	12
236	'>gi|4557701|ref|NP_000413.1| keratin, type I cytoskeletal 17 [Homo sapiens]'	11	9	NaN	6	1	9	10	2	11	48
237	'>gi|13129018|ref|NP_076956.1| gamma-glutamylcyclotransferase isoform 1 [Homo sapiens]'	7	NaN	NaN	4	4	7	11	4	11	37
238	'>gi|4557581|ref|NP_001435.1| fatty acid-binding protein, epidermal [Homo sapiens]'	1	NaN	6	10	4	NaN	5	11	11	37
239	'>gi|77539758|ref|NP_001029249.1| histone H4 [Homo sapiens]'	3	3	NaN	11	NaN	NaN	3	8	11	28
240	'>gi|166158925|ref|NP_001107228.1| thymidine phosphorylase isoform 1 proprotein [Homo sapiens]'	NaN	NaN	NaN	11	11	NaN	2	NaN	11	24
241	'>gi|305632783|ref|NP_001182157.1| protein FAM64A isoform 2 [Homo sapiens]'	NaN	11	5	NaN	6	NaN	NaN	NaN	11	22
242	'>gi|4502679|ref|NP_001771.1| CD63 antigen isoform A [Homo sapiens]'	NaN	NaN	NaN	NaN	9	11	NaN	NaN	11	20
243	'''>gi|20070197|ref|NP_005207.2| dolichyl-diphosphooligosaccharide--protein glycosyltransferase 48 kDa subunit precursor [Homo sapi...'' <Preview truncated at 128 characters>'	NaN	NaN	NaN	NaN	11	8	NaN	NaN	11	19
244	'>gi|291621647|ref|NP_006311.2| membrane-associated progesterone receptor component 2 [Homo sapiens]'	NaN	NaN	NaN	NaN	NaN	7	11	NaN	11	18
245	'>gi|166795299|ref|NP_006507.2| solute carrier family 2, facilitated glucose transporter member 1 [Homo sapiens]'	NaN	NaN	NaN	NaN	11	6	NaN	NaN	11	17
246	'>gi|189458819|ref|NP_001121620.1| transferrin receptor protein 1 [Homo sapiens]'	NaN	NaN	NaN	11	6	NaN	NaN	NaN	11	17
247	'>gi|4503483|ref|NP_001952.1| elongation factor 2 [Homo sapiens]'	2	NaN	NaN	11	1	NaN	2	1	11	17
248	'>gi|403420580|ref|NP_001258142.1| sulfide:quinone oxidoreductase, mitochondrial [Homo sapiens]'	NaN	NaN	NaN	NaN	11	4	NaN	NaN	11	15
249	'>gi|372266129|ref|NP_001243194.1| protein flightless-1 homolog isoform 3 [Homo sapiens]'	NaN	NaN	11	NaN	3	NaN	NaN	NaN	11	14
250	'>gi|106775678|ref|NP_001035807.1| histone H2A type 2-A [Homo sapiens]'	NaN	NaN	NaN	11	NaN	NaN	NaN	1	11	12
251	'>gi|584458478|ref|NP_001276879.1| elongation factor 1-delta isoform 2 [Homo sapiens]'	NaN	NaN	NaN	1	NaN	11	NaN	NaN	11	12
252	'>gi|14210536|ref|NP_115914.1| tubulin beta-6 chain [Homo sapiens]'	NaN	NaN	NaN	NaN	11	NaN	NaN	NaN	11	11
253	'>gi|284807150|ref|NP_001165282.1| glucosylceramidase isoform 2 [Homo sapiens]'	NaN	NaN	NaN	NaN	11	NaN	NaN	NaN	11	11
254	'>gi|308818195|ref|NP_001184222.1| dihydropyrimidinase-related protein 2 isoform 1 [Homo sapiens]'	NaN	NaN	NaN	NaN	11	NaN	NaN	NaN	11	11
255	'>gi|31621305|ref|NP_573566.2| leucine-rich PPR motif-containing protein, mitochondrial precursor [Homo sapiens]'	NaN	NaN	11	NaN	NaN	NaN	NaN	NaN	11	11
256	'>gi|4758032|ref|NP_004757.1| coatomer subunit beta'' [Homo sapiens]'	NaN	NaN	NaN	11	NaN	NaN	NaN	NaN	11	11
257	'>gi|530415144|ref|XP_005260107.1| PREDICTED: ubiquitin-60S ribosomal protein L40 isoform X1 [Homo sapiens]'	NaN	NaN	11	NaN	NaN	NaN	NaN	NaN	11	11
258	'>gi|5730023|ref|NP_006657.1| ruvB-like 2 [Homo sapiens]'	NaN	NaN	NaN	NaN	11	NaN	NaN	NaN	11	11
259	'>gi|578801453|ref|XP_006711586.1| PREDICTED: tropomyosin alpha-3 chain isoform X9 [Homo sapiens]'	NaN	NaN	NaN	11	NaN	NaN	NaN	NaN	11	11
260	'>gi|58331171|ref|NP_001009186.1| T-complex protein 1 subunit zeta isoform b [Homo sapiens]'	NaN	NaN	NaN	NaN	11	NaN	NaN	NaN	11	11
261	'>gi|59850762|ref|NP_060473.2| uveal autoantigen with coiled-coil domains and ankyrin repeats isoform 1 [Homo sapiens]'	NaN	NaN	11	NaN	NaN	NaN	NaN	NaN	11	11
262	'>gi|63162572|ref|NP_005989.3| T-complex protein 1 subunit gamma isoform a [Homo sapiens]'	NaN	NaN	NaN	NaN	11	NaN	NaN	NaN	11	11
263	'>gi|94721239|ref|NP_038203.2| isoleucine--tRNA ligase, cytoplasmic [Homo sapiens]'	NaN	NaN	11	NaN	NaN	NaN	NaN	NaN	11	11
264	'>gi|150456463|ref|NP_835465.2| gasdermin-A [Homo sapiens]'	9	1	1	4	6	10	8	8	10	47
265	'>gi|39995109|ref|NP_000396.2| ganglioside GM2 activator isoform 1 precursor [Homo sapiens]'	1	3	NaN	5	4	7	10	5	10	35
266	'>gi|4505821|ref|NP_002643.1| prolactin-inducible protein precursor [Homo sapiens]'	6	10	6	6	NaN	NaN	3	2	10	33
267	'>gi|112380628|ref|NP_005552.3| lysosome-associated membrane glycoprotein 1 precursor [Homo sapiens]'	2	NaN	5	10	6	3	3	NaN	10	29
268	'>Reverse >gi|19923985|ref|NP_612462.1| ras-related protein Rab-3C [Homo sapiens]'	NaN	5	NaN	NaN	NaN	NaN	6	10	10	21
269	'>Reverse >gi|4759000|ref|NP_004274.1| ras-related protein Rab-3D [Homo sapiens]'	NaN	5	NaN	NaN	NaN	NaN	6	10	10	21
270	'>gi|4502053|ref|NP_001130.1| arachidonate 12-lipoxygenase, 12R-type [Homo sapiens]'	NaN	NaN	NaN	2	10	5	2	1	10	20
271	'>gi|33946329|ref|NP_005393.2| ras-related protein Ral-A precursor [Homo sapiens]'	NaN	NaN	NaN	NaN	NaN	10	8	NaN	10	18
272	'>gi|98986464|ref|NP_006818.3| transmembrane emp24 domain-containing protein 10 precursor [Homo sapiens]'	NaN	NaN	NaN	NaN	NaN	4	10	3	10	17
273	'>gi|4557014|ref|NP_001743.1| catalase [Homo sapiens]'	10	NaN	NaN	1	2	2	1	NaN	10	16
274	'>gi|44890059|ref|NP_005538.2| involucrin [Homo sapiens]'	NaN	NaN	NaN	10	5	NaN	NaN	NaN	10	15
275	'>gi|4504747|ref|NP_002195.1| integrin alpha-3 isoform a precursor [Homo sapiens]'	NaN	NaN	NaN	4	1	10	NaN	NaN	10	15
276	'>gi|48255941|ref|NP_001001391.1| CD44 antigen isoform 4 precursor [Homo sapiens]'	NaN	NaN	NaN	10	3	NaN	2	NaN	10	15
277	'>gi|5032315|ref|NP_004001.1| dystrophin Dp427p2 isoform [Homo sapiens]'	NaN	NaN	NaN	NaN	4	NaN	10	NaN	10	14
278	'>gi|153791670|ref|NP_056932.2| keratin, type II cytoskeletal 2 oral [Homo sapiens]'	10	1	NaN	NaN	NaN	NaN	NaN	NaN	10	11
279	'>gi|10880989|ref|NP_067075.1| ras-related protein Rab-18 isoform 1 [Homo sapiens]'	NaN	NaN	NaN	NaN	NaN	NaN	10	NaN	10	10
280	'>gi|13259508|ref|NP_075408.1| dynactin subunit 1 isoform 2 [Homo sapiens]'	NaN	NaN	10	NaN	NaN	NaN	NaN	NaN	10	10
281	'>gi|332800981|ref|NP_001193880.1| monocarboxylate transporter 4 [Homo sapiens]'	NaN	NaN	NaN	NaN	NaN	10	NaN	NaN	10	10
282	'>gi|5031873|ref|NP_005561.1| protein ERGIC-53 precursor [Homo sapiens]'	NaN	NaN	NaN	NaN	10	NaN	NaN	NaN	10	10
283	'>gi|531990816|ref|NP_001269091.1| F-actin-capping protein subunit beta isoform 4 [Homo sapiens]'	NaN	NaN	NaN	NaN	NaN	10	NaN	NaN	10	10
284	'>gi|5803149|ref|NP_006806.1| transmembrane emp24 domain-containing protein 2 precursor [Homo sapiens]'	NaN	NaN	NaN	NaN	NaN	NaN	10	NaN	10	10
285	'>gi|54607141|ref|NP_060626.2| vacuolar protein sorting-associated protein 13D isoform 2 [Homo sapiens]'	6	6	9	6	6	6	9	9	9	57
286	'>gi|528524479|ref|NP_001268649.1| polyubiquitin-B precursor [Homo sapiens]'	3	3	NaN	7	7	8	9	7	9	44
287	'>gi|67782356|ref|NP_001255.3| corneodesmosin precursor [Homo sapiens]'	9	3	6	5	9	4	3	3	9	42
288	'>gi|311893365|ref|NP_001185798.1| calpain-1 catalytic subunit [Homo sapiens]'	7	NaN	NaN	9	8	NaN	3	NaN	9	27
289	'>gi|150036268|ref|NP_004002.2| dystrophin Dp260-1 isoform [Homo sapiens]'	NaN	2	6	NaN	NaN	9	NaN	NaN	9	17
290	'>gi|24430190|ref|NP_002266.2| keratin, type I cytoskeletal 15 [Homo sapiens]'	9	NaN	1	7	NaN	NaN	NaN	NaN	9	17
291	'>gi|39725636|ref|NP_059980.2| transmembrane emp24 domain-containing protein 9 precursor [Homo sapiens]'	NaN	NaN	NaN	NaN	NaN	8	9	NaN	9	17
292	'>gi|4504183|ref|NP_000843.1| glutathione S-transferase P [Homo sapiens]'	NaN	NaN	NaN	9	2	NaN	3	3	9	17
293	'>gi|110611903|ref|NP_060003.2| myosin-4 [Homo sapiens]'	NaN	9	4	NaN	NaN	NaN	NaN	NaN	9	13
294	'>gi|28173564|ref|NP_778238.1| keratin, type II cytoskeletal 73 [Homo sapiens]'	NaN	9	NaN	NaN	NaN	NaN	4	NaN	9	13
295	'>gi|67782365|ref|NP_005547.3| keratin, type II cytoskeletal 7 [Homo sapiens]'	9	2	NaN	NaN	1	NaN	NaN	NaN	9	12
296	'>gi|38372925|ref|NP_940991.1| basigin isoform 2 [Homo sapiens]'	NaN	NaN	NaN	NaN	9	2	NaN	NaN	9	11
297	'>gi|52630342|ref|NP_002108.4| HLA class I histocompatibility antigen, Cw-1 alpha chain precursor [Homo sapiens]'	NaN	NaN	NaN	NaN	9	2	NaN	NaN	9	11
298	'>gi|16933567|ref|NP_005361.2| ras-related protein Rab-8A [Homo sapiens]'	NaN	NaN	NaN	NaN	NaN	1	9	NaN	9	10
299	'''>Reverse >gi|111154101|ref|NP_689738.3| amyotrophic lateral sclerosis 2 chromosomal region candidate gene 11 protein isoform 2 [...'' <Preview truncated at 128 characters>'	9	NaN	NaN	NaN	NaN	NaN	NaN	NaN	9	9
300	'>Reverse >gi|68303549|ref|NP_001020117.1| argininosuccinate lyase isoform 3 [Homo sapiens]'	NaN	NaN	NaN	NaN	NaN	NaN	NaN	9	9	9
301	'>gi|11496885|ref|NP_005442.2| PDZ and LIM domain protein 7 isoform 1 [Homo sapiens]'	NaN	NaN	NaN	NaN	9	NaN	NaN	NaN	9	9
302	'>gi|14589866|ref|NP_004309.2| aspartyl/asparaginyl beta-hydroxylase isoform a [Homo sapiens]'	NaN	NaN	NaN	9	NaN	NaN	NaN	NaN	9	9
303	'>gi|156564401|ref|NP_006169.2| vesicle-fusing ATPase [Homo sapiens]'	NaN	NaN	NaN	NaN	9	NaN	NaN	NaN	9	9
304	'>gi|20631958|ref|NP_620116.1| apoptosis regulator BAX isoform alpha [Homo sapiens]'	NaN	NaN	NaN	NaN	NaN	NaN	9	NaN	9	9
305	'>gi|212549756|ref|NP_742127.1| calcium/calmodulin-dependent protein kinase type II subunit delta isoform 4 [Homo sapiens]'	NaN	NaN	NaN	NaN	9	NaN	NaN	NaN	9	9
306	'>gi|22902130|ref|NP_690621.1| inactive tyrosine-protein kinase 7 isoform d precursor [Homo sapiens]'	NaN	NaN	9	NaN	NaN	NaN	NaN	NaN	9	9
307	'>gi|256222019|ref|NP_057215.3| ras-related protein Rab-10 [Homo sapiens]'	NaN	NaN	NaN	NaN	NaN	NaN	9	NaN	9	9
308	'>gi|32967311|ref|NP_004422.2| ephrin type-A receptor 2 precursor [Homo sapiens]'	NaN	NaN	NaN	9	NaN	NaN	NaN	NaN	9	9
309	'>gi|4502565|ref|NP_001740.1| calpain small subunit 1 [Homo sapiens]'	NaN	NaN	NaN	NaN	NaN	NaN	9	NaN	9	9
310	'>gi|4505531|ref|NP_002547.1| oxysterol-binding protein 1 [Homo sapiens]'	NaN	NaN	NaN	9	NaN	NaN	NaN	NaN	9	9
311	'>gi|57863257|ref|NP_110379.2| T-complex protein 1 subunit alpha isoform a [Homo sapiens]'	NaN	NaN	NaN	NaN	9	NaN	NaN	NaN	9	9
312	'>gi|5901912|ref|NP_008819.1| calmodulin [Homo sapiens]'	NaN	NaN	NaN	9	NaN	NaN	NaN	NaN	9	9
313	'>gi|61742777|ref|NP_005566.2| leucyl-cystinyl aminopeptidase isoform 1 [Homo sapiens]'	NaN	NaN	9	NaN	NaN	NaN	NaN	NaN	9	9
314	'>gi|61744483|ref|NP_001013269.1| 4F2 cell-surface antigen heavy chain isoform f [Homo sapiens]'	NaN	NaN	NaN	NaN	9	NaN	NaN	NaN	9	9
315	'>gi|94721252|ref|NP_919415.2| vesicle-associated membrane protein-associated protein A isoform 2 [Homo sapiens]'	NaN	NaN	NaN	NaN	NaN	9	NaN	NaN	9	9
316	'>gi|148539848|ref|NP_077741.2| desmocollin-3 isoform Dsc3b preproprotein [Homo sapiens]'	8	4	5	4	5	1	NaN	NaN	8	27
317	'>Reverse >gi|635172830|ref|NP_001278917.1| carboxypeptidase N subunit 2 precursor [Homo sapiens]'	5	5	NaN	2	8	NaN	NaN	6	8	26
318	'>gi|4502101|ref|NP_000691.1| annexin A1 [Homo sapiens]'	NaN	NaN	NaN	7	4	8	NaN	NaN	8	19
319	'>gi|213688375|ref|NP_001135417.1| actin, aortic smooth muscle [Homo sapiens]'	2	NaN	NaN	NaN	6	8	NaN	NaN	8	16
320	'>gi|4885281|ref|NP_005262.1| glutamate dehydrogenase 1, mitochondrial precursor [Homo sapiens]'	7	8	NaN	NaN	NaN	1	NaN	NaN	8	16
321	'>gi|5453704|ref|NP_006398.1| PRA1 family protein 3 [Homo sapiens]'	NaN	NaN	NaN	NaN	NaN	4	3	8	8	15
322	'>gi|4507357|ref|NP_003555.1| transgelin-2 isoform b [Homo sapiens]'	NaN	NaN	NaN	8	NaN	NaN	6	NaN	8	14
323	'>gi|4759302|ref|NP_004729.1| vesicle-associated membrane protein-associated protein B/C isoform 1 [Homo sapiens]'	NaN	NaN	NaN	NaN	NaN	8	6	NaN	8	14
324	'>Reverse >gi|4504143|ref|NP_000833.1| metabotropic glutamate receptor 5 isoform b precursor [Homo sapiens]'	NaN	NaN	NaN	NaN	4	NaN	NaN	8	8	12
325	'>gi|222418613|ref|NP_001138468.1| integrin alpha-7 isoform 1 precursor [Homo sapiens]'	NaN	NaN	8	NaN	3	NaN	NaN	NaN	8	11
326	'>gi|333470719|ref|NP_001193997.1| basic leucine zipper and W2 domain-containing protein 1 isoform 2 [Homo sapiens]'	NaN	NaN	NaN	NaN	8	3	NaN	NaN	8	11
327	'>gi|4507705|ref|NP_003302.1| pleckstrin homology-like domain family A member 2 [Homo sapiens]'	NaN	NaN	NaN	NaN	NaN	3	8	NaN	8	11
328	'>gi|149999606|ref|NP_006293.2| mannosyl-oligosaccharide glucosidase isoform 1 [Homo sapiens]'	NaN	NaN	NaN	8	2	NaN	NaN	NaN	8	10
329	'>gi|112382250|ref|NP_003119.2| spectrin beta chain, non-erythrocytic 1 isoform 1 [Homo sapiens]'	NaN	8	NaN	NaN	NaN	NaN	NaN	NaN	8	8
330	'>gi|13376617|ref|NP_079348.1| prostaglandin E synthase 2 isoform 1 [Homo sapiens]'	NaN	NaN	NaN	NaN	NaN	8	NaN	NaN	8	8
331	'>gi|14141161|ref|NP_004492.2| heterogeneous nuclear ribonucleoprotein U isoform b [Homo sapiens]'	NaN	NaN	NaN	8	NaN	NaN	NaN	NaN	8	8
332	'>gi|145309311|ref|NP_001034680.2| probable ubiquitin carboxyl-terminal hydrolase FAF-X isoform 4 [Homo sapiens]'	NaN	8	NaN	NaN	NaN	NaN	NaN	NaN	8	8
333	'>gi|190194386|ref|NP_064508.3| transmembrane 9 superfamily member 3 precursor [Homo sapiens]'	NaN	NaN	NaN	NaN	8	NaN	NaN	NaN	8	8
334	'>gi|197276600|ref|NP_001127836.1| microtubule-associated protein 4 isoform 4 [Homo sapiens]'	NaN	NaN	8	NaN	NaN	NaN	NaN	NaN	8	8
335	'>gi|21361657|ref|NP_005304.3| protein disulfide-isomerase A3 precursor [Homo sapiens]'	NaN	NaN	NaN	8	NaN	NaN	NaN	NaN	8	8
336	'>gi|28933465|ref|NP_803173.1| syntaxin-12 [Homo sapiens]'	NaN	NaN	NaN	NaN	NaN	8	NaN	NaN	8	8
337	'>gi|344925830|ref|NP_001230708.1| redox-regulatory protein FAM213A isoform 1 precursor [Homo sapiens]'	NaN	NaN	NaN	NaN	NaN	NaN	8	NaN	8	8
338	'>gi|48762932|ref|NP_006576.2| T-complex protein 1 subunit theta isoform 1 [Homo sapiens]'	NaN	NaN	NaN	NaN	8	NaN	NaN	NaN	8	8
339	'>gi|4885063|ref|NP_005156.1| fructose-bisphosphate aldolase C [Homo sapiens]'	NaN	NaN	NaN	8	NaN	NaN	NaN	NaN	8	8
340	'>gi|5729770|ref|NP_000382.3| tripeptidyl-peptidase 1 preproprotein [Homo sapiens]'	NaN	NaN	NaN	NaN	8	NaN	NaN	NaN	8	8
341	'>gi|7019485|ref|NP_037364.1| programmed cell death protein 6 isoform 1 [Homo sapiens]'	NaN	NaN	NaN	NaN	NaN	NaN	8	NaN	8	8
342	'>gi|4503113|ref|NP_001314.1| cystatin-M precursor [Homo sapiens]'	5	3	NaN	7	5	3	6	5	7	34
343	'>gi|4506145|ref|NP_002760.1| trypsin-1 preproprotein [Homo sapiens]'	5	5	4	7	4	2	4	NaN	7	31
344	'>Reverse >gi|119395750|ref|NP_006112.3| keratin, type II cytoskeletal 1 [Homo sapiens]'	7	4	2	3	NaN	6	NaN	NaN	7	22
345	'>gi|22507405|ref|NP_683695.1| short-chain dehydrogenase/reductase family 9C member 7 [Homo sapiens]'	NaN	NaN	NaN	NaN	3	6	7	3	7	19
346	'>sp|CAS1_BOVIN|(Common contaminant protein)'	NaN	3	1	NaN	2	7	5	1	7	19
347	'>Reverse >gi|13491166|ref|NP_055491.1| pumilio homolog 1 isoform 2 [Homo sapiens]'	7	7	NaN	NaN	NaN	NaN	NaN	NaN	7	14
348	'>gi|635574573|ref|NP_001278977.1| ras-related protein Rab-5A isoform 2 [Homo sapiens]'	NaN	NaN	NaN	NaN	NaN	7	7	NaN	7	14
349	'>gi|17921989|ref|NP_005991.1| tubulin alpha-4A chain isoform 1 [Homo sapiens]'	NaN	NaN	NaN	2	7	3	NaN	1	7	13
350	'>gi|302565871|ref|NP_065944.2| coiled-coil domain-containing protein 180 [Homo sapiens]'	NaN	NaN	7	NaN	6	NaN	NaN	NaN	7	13
351	'>gi|386869503|ref|NP_001247435.1| 40S ribosomal protein S3 isoform 2 [Homo sapiens]'	NaN	NaN	NaN	NaN	NaN	3	3	7	7	13
352	'>gi|4503481|ref|NP_001395.1| elongation factor 1-gamma [Homo sapiens]'	2	NaN	NaN	4	7	NaN	NaN	NaN	7	13
353	'>gi|4826898|ref|NP_005013.1| profilin-1 [Homo sapiens]'	NaN	NaN	NaN	7	NaN	NaN	1	5	7	13
354	'>gi|224831241|ref|NP_001139281.1| myosin-14 isoform 3 [Homo sapiens]'	NaN	2	3	7	NaN	NaN	NaN	NaN	7	12
355	'>gi|354983495|ref|NP_001238979.1| protein-L-isoaspartate(D-aspartate) O-methyltransferase isoform 3 [Homo sapiens]'	NaN	NaN	NaN	NaN	7	NaN	NaN	4	7	11
356	'>gi|4502317|ref|NP_001687.1| V-type proton ATPase subunit E 1 isoform a [Homo sapiens]'	NaN	NaN	NaN	3	NaN	7	1	NaN	7	11
357	'>gi|109255251|ref|NP_000418.2| loricrin [Homo sapiens]'	3	NaN	NaN	NaN	7	NaN	NaN	NaN	7	10
358	'>gi|23308577|ref|NP_006614.2| D-3-phosphoglycerate dehydrogenase [Homo sapiens]'	NaN	NaN	NaN	3	7	NaN	NaN	NaN	7	10
359	'>gi|4758018|ref|NP_004359.1| calponin-2 isoform a [Homo sapiens]'	NaN	NaN	NaN	NaN	NaN	3	7	NaN	7	10
360	'>gi|345198270|ref|NP_001230824.1| tumor protein D54 isoform j [Homo sapiens]'	NaN	NaN	NaN	NaN	2	NaN	7	NaN	7	9
361	'>gi|50592996|ref|NP_006077.2| tubulin beta-3 chain isoform 1 [Homo sapiens]'	NaN	NaN	NaN	NaN	7	2	NaN	NaN	7	9
362	'''>gi|578804821|ref|XP_006712781.1| PREDICTED: signal transducer and activator of transcription 1-alpha/beta isoform X1 [Homo sapi...'' <Preview truncated at 128 characters>'	7	2	NaN	NaN	NaN	NaN	NaN	NaN	7	9
363	'>gi|11321585|ref|NP_002065.1| guanine nucleotide-binding protein G(I)/G(S)/G(T) subunit beta-1 isoform 1 [Homo sapiens]'	NaN	NaN	NaN	NaN	NaN	7	NaN	NaN	7	7
364	'>gi|117168248|ref|NP_057479.2| very-long-chain (3R)-3-hydroxyacyl-CoA dehydratase 3 [Homo sapiens]'	NaN	NaN	NaN	NaN	NaN	7	NaN	NaN	7	7
365	'>gi|119964726|ref|NP_000867.2| cation-independent mannose-6-phosphate receptor precursor [Homo sapiens]'	NaN	7	NaN	NaN	NaN	NaN	NaN	NaN	7	7
366	'>gi|153792663|ref|NP_060004.3| myosin-2 [Homo sapiens]'	NaN	7	NaN	NaN	NaN	NaN	NaN	NaN	7	7
367	'>gi|170932494|ref|NP_003560.2| syntaxin-7 [Homo sapiens]'	NaN	NaN	NaN	NaN	NaN	7	NaN	NaN	7	7
368	'>gi|192807292|ref|NP_061889.2| keratin, type I cytoskeletal 24 [Homo sapiens]'	7	NaN	NaN	NaN	NaN	NaN	NaN	NaN	7	7
369	'>gi|223468630|ref|NP_001138551.1| conserved oligomeric Golgi complex subunit 6 isoform 2 [Homo sapiens]'	NaN	NaN	NaN	NaN	7	NaN	NaN	NaN	7	7
370	'>gi|315138990|ref|NP_001186704.1| carboxypeptidase D isoform 2 [Homo sapiens]'	NaN	NaN	7	NaN	NaN	NaN	NaN	NaN	7	7
371	'>gi|327315343|ref|NP_001192157.1| sortilin isoform 2 [Homo sapiens]'	NaN	NaN	NaN	7	NaN	NaN	NaN	NaN	7	7
372	'>gi|343168770|ref|NP_001230209.1| CD166 antigen isoform 2 precursor [Homo sapiens]'	NaN	NaN	NaN	7	NaN	NaN	NaN	NaN	7	7
373	'>gi|373938448|ref|NP_001243328.1| elongation of very long chain fatty acids protein 1 isoform 1 [Homo sapiens]'	NaN	NaN	NaN	NaN	NaN	NaN	7	NaN	7	7
374	'>gi|38455427|ref|NP_006421.2| T-complex protein 1 subunit delta isoform a [Homo sapiens]'	NaN	NaN	NaN	NaN	7	NaN	NaN	NaN	7	7
375	'>gi|40317626|ref|NP_003237.2| thrombospondin-1 precursor [Homo sapiens]'	NaN	NaN	7	NaN	NaN	NaN	NaN	NaN	7	7
376	'>gi|44680105|ref|NP_149129.2| caldesmon isoform 1 [Homo sapiens]'	NaN	NaN	NaN	NaN	7	NaN	NaN	NaN	7	7
377	'>gi|4503253|ref|NP_001335.1| dolichyl-diphosphooligosaccharide--protein glycosyltransferase subunit DAD1 [Homo sapiens]'	NaN	NaN	NaN	NaN	NaN	NaN	NaN	7	7	7
378	'>gi|4506671|ref|NP_000995.1| 60S acidic ribosomal protein P2 [Homo sapiens]'	NaN	NaN	NaN	7	NaN	NaN	NaN	NaN	7	7
379	'>gi|4557617|ref|NP_000811.1| growth arrest-specific protein 6 precursor [Homo sapiens]'	NaN	NaN	NaN	NaN	7	NaN	NaN	NaN	7	7
380	'>gi|4758412|ref|NP_004472.1| polypeptide N-acetylgalactosaminyltransferase 2 precursor [Homo sapiens]'	NaN	NaN	NaN	NaN	7	NaN	NaN	NaN	7	7
381	'''>gi|511630715|ref|NP_001265432.1| dolichyl-diphosphooligosaccharide--protein glycosyltransferase subunit STT3A isoform a [Homo s...'' <Preview truncated at 128 characters>'	NaN	NaN	NaN	NaN	7	NaN	NaN	NaN	7	7
382	'>gi|523425734|ref|NP_001265637.1| 26S proteasome non-ATPase regulatory subunit 2 isoform 2 [Homo sapiens]'	NaN	NaN	NaN	7	NaN	NaN	NaN	NaN	7	7
383	'>gi|5803023|ref|NP_006807.1| vesicular integral-membrane protein VIP36 precursor [Homo sapiens]'	NaN	NaN	NaN	NaN	NaN	7	NaN	NaN	7	7
384	'>gi|6466450|ref|NP_009294.1| catechol O-methyltransferase isoform S-COMT [Homo sapiens]'	NaN	NaN	NaN	NaN	NaN	NaN	7	NaN	7	7
385	'>gi|656985039|ref|NP_001280624.1| septin-9 isoform g [Homo sapiens]'	NaN	NaN	NaN	NaN	7	NaN	NaN	NaN	7	7
386	'>gi|7661948|ref|NP_055545.1| malectin precursor [Homo sapiens]'	NaN	NaN	NaN	NaN	NaN	7	NaN	NaN	7	7
387	'>gi|349732256|ref|NP_001231867.1| thioredoxin isoform 2 [Homo sapiens]'	4	1	1	5	2	3	5	6	6	27
388	'>gi|17998551|ref|NP_536722.1| serpin B12 [Homo sapiens]'	4	3	5	NaN	6	3	5	NaN	6	26
389	'>gi|4885165|ref|NP_005204.1| cystatin-A [Homo sapiens]'	3	2	NaN	4	2	3	3	6	6	23
390	'>gi|4506189|ref|NP_002783.1| proteasome subunit alpha type-7 [Homo sapiens]'	5	NaN	NaN	6	1	5	3	1	6	21
391	'>gi|4557894|ref|NP_000230.1| lysozyme C precursor [Homo sapiens]'	2	4	1	3	NaN	1	6	4	6	21
392	'>gi|4557367|ref|NP_000377.1| bleomycin hydrolase [Homo sapiens]'	4	2	1	5	6	2	NaN	NaN	6	20
393	'>gi|17158005|ref|NP_477521.1| mucin-like protein 1 precursor [Homo sapiens]'	1	4	NaN	4	NaN	NaN	6	4	6	19
394	'>Reverse >gi|658310017|ref|NP_001280744.1| aldehyde dehydrogenase family 1 member A3 isoform 2 [Homo sapiens]'	6	NaN	NaN	NaN	4	3	4	NaN	6	17
395	'>gi|169646441|ref|NP_001108628.1| rab GDP dissociation inhibitor beta isoform 2 [Homo sapiens]'	4	NaN	NaN	3	6	NaN	3	NaN	6	16
396	'>gi|17986258|ref|NP_066299.2| myosin light polypeptide 6 isoform 1 [Homo sapiens]'	NaN	NaN	NaN	4	NaN	NaN	5	6	6	15
397	'>gi|47825361|ref|NP_001001414.1| F-box only protein 50 [Homo sapiens]'	NaN	NaN	NaN	NaN	NaN	6	5	3	6	14
398	'>gi|331999954|ref|NP_002263.3| keratin, type II cytoskeletal 4 [Homo sapiens]'	6	5	NaN	NaN	NaN	NaN	2	NaN	6	13
399	'>gi|88501738|ref|NP_001034230.1| TRIO and F-actin-binding protein isoform 6 [Homo sapiens]'	NaN	NaN	6	NaN	NaN	4	3	NaN	6	13
400	'>gi|38455402|ref|NP_005555.2| neutrophil gelatinase-associated lipocalin precursor [Homo sapiens]'	NaN	NaN	NaN	NaN	NaN	5	6	NaN	6	11
401	'>gi|7705855|ref|NP_057226.1| estradiol 17-beta-dehydrogenase 12 [Homo sapiens]'	NaN	NaN	NaN	NaN	NaN	5	6	NaN	6	11
402	'>gi|9845502|ref|NP_002286.2| 40S ribosomal protein SA [Homo sapiens]'	NaN	NaN	NaN	6	1	3	NaN	1	6	11
403	'>gi|33457308|ref|NP_872353.2| transmembrane emp24 domain-containing protein 4 precursor [Homo sapiens]'	NaN	NaN	NaN	NaN	NaN	4	6	NaN	6	10
404	'>gi|374671789|ref|NP_001243442.1| single-stranded DNA-binding protein, mitochondrial precursor [Homo sapiens]'	NaN	NaN	NaN	NaN	NaN	NaN	4	6	6	10
405	'>gi|7661744|ref|NP_054757.1| basic leucine zipper and W2 domain-containing protein 2 [Homo sapiens]'	6	NaN	NaN	NaN	4	NaN	NaN	NaN	6	10
406	'>gi|325301078|ref|NP_001191456.1| translocon-associated protein subunit delta isoform 3 precursor [Homo sapiens]'	NaN	NaN	NaN	NaN	NaN	1	6	2	6	9
407	'>gi|357933617|ref|NP_001239546.1| lipocalin-1 isoform 1 precursor [Homo sapiens]'	6	NaN	NaN	3	NaN	NaN	NaN	NaN	6	9
408	'>gi|7019415|ref|NP_037468.1| protein transport protein Sec61 subunit alpha isoform 1 [Homo sapiens]'	NaN	NaN	NaN	NaN	NaN	6	3	NaN	6	9
409	'>gi|205277463|ref|NP_001128527.1| transketolase isoform 1 [Homo sapiens]'	NaN	NaN	NaN	2	6	NaN	NaN	NaN	6	8
410	'>gi|153791158|ref|NP_004684.2| keratin, type II cytoskeletal 75 [Homo sapiens]'	6	NaN	NaN	NaN	NaN	1	NaN	NaN	6	7
411	'>gi|83582815|ref|NP_003116.2| cornifin-B [Homo sapiens]'	1	NaN	NaN	NaN	6	NaN	NaN	NaN	6	7
412	'''>Reverse >gi|270133205|ref|NP_001161688.1| amyotrophic lateral sclerosis 2 chromosomal region candidate gene 11 protein isoform ...'' <Preview truncated at 128 characters>'	NaN	6	NaN	NaN	NaN	NaN	NaN	NaN	6	6
413	'>Reverse >gi|313747580|ref|NP_001186306.1| long-chain-fatty-acid--CoA ligase ACSBG1 isoform 2 [Homo sapiens]'	NaN	NaN	6	NaN	NaN	NaN	NaN	NaN	6	6
414	'>Reverse >gi|71565152|ref|NP_000661.2| alcohol dehydrogenase 4 [Homo sapiens]'	6	NaN	NaN	NaN	NaN	NaN	NaN	NaN	6	6
415	'>gi|122937321|ref|NP_001073930.1| homeobox protein unc-4 homolog [Homo sapiens]'	NaN	NaN	NaN	NaN	6	NaN	NaN	NaN	6	6
416	'>gi|13236587|ref|NP_077310.1| transmembrane protein 43 [Homo sapiens]'	NaN	NaN	NaN	NaN	NaN	6	NaN	NaN	6	6
417	'>gi|148225659|ref|NP_055851.1| endonuclease domain-containing 1 protein precursor [Homo sapiens]'	NaN	NaN	NaN	NaN	6	NaN	NaN	NaN	6	6
418	'>gi|21361416|ref|NP_036382.2| ras-related protein R-Ras2 isoform a [Homo sapiens]'	NaN	NaN	NaN	NaN	NaN	NaN	6	NaN	6	6
419	'>gi|222136583|ref|NP_001558.3| phosphatidylinositol 3,4,5-trisphosphate 5-phosphatase 2 [Homo sapiens]'	NaN	NaN	6	NaN	NaN	NaN	NaN	NaN	6	6
420	'>gi|255958282|ref|NP_005808.3| perilipin-3 isoform 1 [Homo sapiens]'	NaN	NaN	NaN	NaN	6	NaN	NaN	NaN	6	6
421	'>gi|258613875|ref|NP_056308.3| KN motif and ankyrin repeat domain-containing protein 2 isoform 1 [Homo sapiens]'	NaN	NaN	NaN	6	NaN	NaN	NaN	NaN	6	6
422	'>gi|29171705|ref|NP_803182.1| melanoma-associated antigen D2 [Homo sapiens]'	NaN	NaN	NaN	NaN	6	NaN	NaN	NaN	6	6
423	'>gi|40254924|ref|NP_060979.2| leucine-rich repeat-containing protein 59 [Homo sapiens]'	NaN	NaN	NaN	NaN	NaN	6	NaN	NaN	6	6
424	'>gi|4503513|ref|NP_003748.1| eukaryotic translation initiation factor 3 subunit I [Homo sapiens]'	NaN	NaN	NaN	NaN	NaN	6	NaN	NaN	6	6
425	'>gi|4506725|ref|NP_000998.1| 40S ribosomal protein S4, X isoform X isoform [Homo sapiens]'	NaN	NaN	NaN	NaN	6	NaN	NaN	NaN	6	6
426	'>gi|4557553|ref|NP_000108.1| emerin [Homo sapiens]'	NaN	NaN	NaN	NaN	NaN	6	NaN	NaN	6	6
427	'>gi|4758984|ref|NP_004654.1| ras-related protein Rab-11A isoform 1 [Homo sapiens]'	NaN	NaN	NaN	6	NaN	NaN	NaN	NaN	6	6
428	'>gi|4759300|ref|NP_004772.1| vesicle-associated membrane protein 3 [Homo sapiens]'	NaN	NaN	NaN	NaN	NaN	NaN	NaN	6	6	6
429	'>gi|499589572|ref|NP_001265121.1| neutral alpha-glucosidase AB isoform 4 [Homo sapiens]'	NaN	NaN	NaN	6	NaN	NaN	NaN	NaN	6	6
430	'>gi|52485853|ref|NP_001004439.1| integrin alpha-11 precursor [Homo sapiens]'	NaN	NaN	6	NaN	NaN	NaN	NaN	NaN	6	6
431	'>gi|528281411|ref|NP_001268441.1| trifunctional enzyme subunit beta, mitochondrial isoform 2 precursor [Homo sapiens]'	NaN	NaN	NaN	NaN	6	NaN	NaN	NaN	6	6
432	'>gi|530417131|ref|XP_005259256.1| PREDICTED: vasodilator-stimulated phosphoprotein isoform X1 [Homo sapiens]'	NaN	NaN	NaN	NaN	6	NaN	NaN	NaN	6	6
433	'>gi|530425322|ref|XP_005259653.1| PREDICTED: nicalin isoform X1 [Homo sapiens]'	NaN	NaN	NaN	NaN	6	NaN	NaN	NaN	6	6
434	'>gi|557878740|ref|NP_001273640.1| long-chain-fatty-acid--CoA ligase 1 isoform c [Homo sapiens]'	NaN	NaN	NaN	NaN	6	NaN	NaN	NaN	6	6
435	'>gi|56605994|ref|NP_001008389.1| CDGSH iron-sulfur domain-containing protein 2 [Homo sapiens]'	NaN	NaN	NaN	NaN	NaN	NaN	NaN	6	6	6
436	'>gi|578818362|ref|XP_006717489.1| PREDICTED: ankyrin repeat domain-containing protein 26 isoform X4 [Homo sapiens]'	6	NaN	NaN	NaN	NaN	NaN	NaN	NaN	6	6
437	'>gi|578831862|ref|XP_006722318.1| PREDICTED: puromycin-sensitive aminopeptidase-like protein-like isoform X1 [Homo sapiens]'	6	NaN	NaN	NaN	NaN	NaN	NaN	NaN	6	6
438	'>gi|663429602|ref|NP_001287674.1| protein transport protein Sec31A isoform 7 [Homo sapiens]'	NaN	NaN	6	NaN	NaN	NaN	NaN	NaN	6	6
439	'>gi|82659109|ref|NP_065816.2| E3 ubiquitin-protein ligase UBR4 [Homo sapiens]'	6	NaN	NaN	NaN	NaN	NaN	NaN	NaN	6	6
440	'>sp|K1M2_SHEEP|(Common contaminant protein)'	6	NaN	NaN	NaN	NaN	NaN	NaN	NaN	6	6
441	'>gi|156713442|ref|NP_001096137.1| proteasome subunit alpha type-4 isoform 1 [Homo sapiens]'	NaN	NaN	NaN	2	4	2	5	NaN	5	13
442	'>sp|K1C15_SHEEP|(Common contaminant protein)'	3	NaN	3	5	NaN	NaN	NaN	NaN	5	11
443	'>gi|117938318|ref|NP_001071089.1| vacuolar protein sorting-associated protein 37D [Homo sapiens]'	NaN	5	NaN	NaN	NaN	NaN	NaN	5	5	10
444	'>gi|13569962|ref|NP_112243.1| ras-related protein Rab-1B [Homo sapiens]'	NaN	NaN	NaN	5	NaN	NaN	5	NaN	5	10
445	'>gi|42822874|ref|NP_976319.1| ribonuclease inhibitor [Homo sapiens]'	NaN	NaN	5	NaN	3	2	NaN	NaN	5	10
446	'>gi|5031631|ref|NP_005497.1| lysosome membrane protein 2 isoform 1 precursor [Homo sapiens]'	NaN	NaN	1	4	5	NaN	NaN	NaN	5	10
447	'>gi|5174447|ref|NP_006089.1| guanine nucleotide-binding protein subunit beta-2-like 1 [Homo sapiens]'	NaN	NaN	NaN	NaN	5	4	1	NaN	5	10
448	'>gi|61743916|ref|NP_057436.2| carboxypeptidase A4 preproprotein [Homo sapiens]'	5	NaN	NaN	3	2	NaN	NaN	NaN	5	10
449	'>Reverse >gi|4506181|ref|NP_002778.1| proteasome subunit alpha type-2 [Homo sapiens]'	NaN	NaN	NaN	NaN	NaN	4	5	NaN	5	9
450	'>gi|41393545|ref|NP_004574.2| ras-related protein Rab-5C isoform a [Homo sapiens]'	NaN	NaN	NaN	NaN	NaN	4	5	NaN	5	9
451	'>gi|530414369|ref|XP_005266835.1| PREDICTED: serpin B12 isoform X1 [Homo sapiens]'	NaN	NaN	NaN	4	NaN	NaN	NaN	5	5	9
452	'>gi|87159824|ref|NP_001034579.1| CD151 antigen [Homo sapiens]'	NaN	NaN	NaN	NaN	NaN	4	5	NaN	5	9
453	'>gi|157649073|ref|NP_001099000.1| adenylyl cyclase-associated protein 1 [Homo sapiens]'	NaN	NaN	NaN	3	5	NaN	NaN	NaN	5	8
454	'>gi|63079709|ref|NP_443200.2| apolipoprotein A-V precursor [Homo sapiens]'	NaN	NaN	3	NaN	5	NaN	NaN	NaN	5	8
455	'>gi|115430112|ref|NP_005660.4| receptor expression-enhancing protein 5 [Homo sapiens]'	NaN	NaN	NaN	NaN	NaN	NaN	5	2	5	7
456	'>gi|115496169|ref|NP_000248.2| myosin-7 [Homo sapiens]'	1	5	1	NaN	NaN	NaN	NaN	NaN	5	7
457	'>gi|148529014|ref|NP_001914.3| DNA damage-binding protein 1 [Homo sapiens]'	NaN	NaN	2	5	NaN	NaN	NaN	NaN	5	7
458	'>gi|256985102|ref|NP_001157941.1| TRAM adaptor with GOLD domain isoform 2 precursor [Homo sapiens]'	NaN	NaN	NaN	NaN	NaN	5	2	NaN	5	7
459	'>gi|5032057|ref|NP_005611.1| protein S100-A11 [Homo sapiens]'	NaN	NaN	NaN	1	1	NaN	NaN	5	5	7
460	'>gi|52694752|ref|NP_001005340.1| transmembrane glycoprotein NMB isoform a precursor [Homo sapiens]'	NaN	NaN	NaN	NaN	5	NaN	NaN	2	5	7
461	'>gi|209862837|ref|NP_001129490.1| epoxide hydrolase 1 [Homo sapiens]'	NaN	NaN	NaN	NaN	5	1	NaN	NaN	5	6
462	'>Reverse >gi|224451128|ref|NP_001136272.1| protein eyes shut homolog isoform 1 precursor [Homo sapiens]'	NaN	NaN	NaN	NaN	NaN	NaN	5	NaN	5	5
463	'>Reverse >gi|530378914|ref|XP_005248407.1| PREDICTED: uncharacterized protein C5orf42 isoform X6 [Homo sapiens]'	NaN	NaN	NaN	5	NaN	NaN	NaN	NaN	5	5
464	'>Reverse >gi|578798836|ref|XP_006710602.1| PREDICTED: microtubule-actin cross-linking factor 1 isoform X28 [Homo sapiens]'	NaN	NaN	5	NaN	NaN	NaN	NaN	NaN	5	5
465	'>gi|10863927|ref|NP_066953.1| peptidyl-prolyl cis-trans isomerase A isoform 1 [Homo sapiens]'	NaN	NaN	NaN	5	NaN	NaN	NaN	NaN	5	5
466	'>gi|13559514|ref|NP_060895.1| phosphatidylinositol 4-kinase type 2-alpha [Homo sapiens]'	NaN	NaN	NaN	NaN	5	NaN	NaN	NaN	5	5
467	'>gi|13787217|ref|NP_001438.1| protocadherin Fat 2 precursor [Homo sapiens]'	NaN	NaN	NaN	NaN	5	NaN	NaN	NaN	5	5
468	'>gi|162417971|ref|NP_055567.2| signal peptidase complex subunit 2 [Homo sapiens]'	NaN	NaN	NaN	NaN	NaN	NaN	5	NaN	5	5
469	'>gi|172072620|ref|NP_055047.2| vesicle-associated membrane protein 2 [Homo sapiens]'	NaN	NaN	NaN	NaN	NaN	NaN	5	NaN	5	5
470	'>gi|193083114|ref|NP_001122386.1| poly(rC)-binding protein 2 isoform g [Homo sapiens]'	NaN	NaN	NaN	NaN	NaN	5	NaN	NaN	5	5
471	'>gi|19923750|ref|NP_002858.2| ras-related protein Rab-3B [Homo sapiens]'	NaN	NaN	NaN	NaN	NaN	NaN	5	NaN	5	5
472	'>gi|20270343|ref|NP_620150.1| ADP-ribosylation factor-like protein 8A isoform 1 [Homo sapiens]'	NaN	NaN	NaN	NaN	NaN	NaN	5	NaN	5	5
473	'>gi|210147446|ref|NP_872301.2| NXPE family member 2 [Homo sapiens]'	5	NaN	NaN	NaN	NaN	NaN	NaN	NaN	5	5
474	'>gi|210147457|ref|NP_001129737.1| intermediate filament family orphan 2 [Homo sapiens]'	NaN	NaN	NaN	NaN	5	NaN	NaN	NaN	5	5
475	'>gi|21361399|ref|NP_055040.2| serine/threonine-protein phosphatase 2A 65 kDa regulatory subunit A alpha isoform [Homo sapiens]'	NaN	NaN	NaN	NaN	5	NaN	NaN	NaN	5	5
476	'>gi|21361462|ref|NP_055416.2| EH domain-containing protein 2 [Homo sapiens]'	NaN	NaN	NaN	NaN	5	NaN	NaN	NaN	5	5
477	'>gi|21361591|ref|NP_057011.2| transforming growth factor beta-1-induced transcript 1 protein isoform 2 [Homo sapiens]'	NaN	NaN	NaN	NaN	5	NaN	NaN	NaN	5	5
478	'>gi|221316632|ref|NP_001137534.1| coatomer subunit beta [Homo sapiens]'	NaN	NaN	NaN	5	NaN	NaN	NaN	NaN	5	5
479	'>gi|222080086|ref|NP_001138356.1| zinc transporter 7 [Homo sapiens]'	NaN	NaN	NaN	NaN	NaN	5	NaN	NaN	5	5
480	'>gi|222144229|ref|NP_001138384.1| ubiquitin-like modifier-activating enzyme ATG7 isoform c [Homo sapiens]'	5	NaN	NaN	NaN	NaN	NaN	NaN	NaN	5	5
481	'>gi|269847750|ref|NP_001161396.1| protein CMSS1 isoform 2 [Homo sapiens]'	NaN	NaN	NaN	NaN	NaN	5	NaN	NaN	5	5
482	'>gi|30578410|ref|NP_849193.1| dolichyl-diphosphooligosaccharide--protein glycosyltransferase subunit STT3B [Homo sapiens]'	NaN	NaN	NaN	NaN	5	NaN	NaN	NaN	5	5
483	'>gi|308818200|ref|NP_001184223.1| dihydropyrimidinase-related protein 3 isoform 1 [Homo sapiens]'	NaN	NaN	NaN	NaN	5	NaN	NaN	NaN	5	5
484	'>gi|32454741|ref|NP_001226.2| serpin H1 precursor [Homo sapiens]'	NaN	NaN	NaN	NaN	5	NaN	NaN	NaN	5	5
485	'>gi|32484979|ref|NP_003655.3| AP-3 complex subunit beta-1 isoform 1 [Homo sapiens]'	NaN	NaN	5	NaN	NaN	NaN	NaN	NaN	5	5
486	'>gi|33359221|ref|NP_079150.3| dyslexia-associated protein KIAA0319-like protein [Homo sapiens]'	NaN	NaN	5	NaN	NaN	NaN	NaN	NaN	5	5
487	'>gi|337752170|ref|NP_001229687.1| HLA class I histocompatibility antigen, A-1 alpha chain precursor [Homo sapiens]'	NaN	NaN	NaN	NaN	5	NaN	NaN	NaN	5	5
488	'>gi|350529366|ref|NP_001231919.1| protein phosphatase 1 regulatory subunit 12A isoform c [Homo sapiens]'	NaN	NaN	NaN	NaN	5	NaN	NaN	NaN	5	5
489	'>gi|371502127|ref|NP_001243069.1| macrophage-capping protein isoform 2 [Homo sapiens]'	NaN	NaN	NaN	5	NaN	NaN	NaN	NaN	5	5
490	'>gi|374092020|ref|NP_006448.4| PDZ and LIM domain protein 5 isoform a [Homo sapiens]'	NaN	NaN	NaN	NaN	5	NaN	NaN	NaN	5	5
491	'>gi|38045913|ref|NP_937818.1| nucleoside diphosphate kinase A isoform a [Homo sapiens]'	NaN	NaN	NaN	5	NaN	NaN	NaN	NaN	5	5
492	'>gi|38683799|ref|NP_149112.1| ankyrin repeat domain-containing protein 13A [Homo sapiens]'	NaN	NaN	NaN	NaN	5	NaN	NaN	NaN	5	5
493	'>gi|4503301|ref|NP_001350.1| 2,4-dienoyl-CoA reductase, mitochondrial precursor [Homo sapiens]'	NaN	NaN	NaN	NaN	NaN	5	NaN	NaN	5	5
494	'>gi|4504437|ref|NP_002124.1| heme oxygenase 1 [Homo sapiens]'	NaN	NaN	NaN	5	NaN	NaN	NaN	NaN	5	5
495	'>gi|4504981|ref|NP_002296.1| galectin-1 [Homo sapiens]'	NaN	NaN	NaN	NaN	NaN	NaN	NaN	5	5	5
496	'>gi|4505753|ref|NP_002620.1| phosphoglycerate mutase 1 [Homo sapiens]'	NaN	NaN	NaN	5	NaN	NaN	NaN	NaN	5	5
497	'>gi|4506209|ref|NP_002794.1| 26S protease regulatory subunit 7 isoform 1 [Homo sapiens]'	NaN	NaN	NaN	NaN	5	NaN	NaN	NaN	5	5
498	'>gi|4506405|ref|NP_002872.1| ras-related protein Ral-B [Homo sapiens]'	NaN	NaN	NaN	NaN	NaN	NaN	5	NaN	5	5
499	'>gi|4506753|ref|NP_003698.1| ruvB-like 1 [Homo sapiens]'	NaN	NaN	NaN	NaN	5	NaN	NaN	NaN	5	5
500	'>gi|4507207|ref|NP_003121.1| sorcin isoform A [Homo sapiens]'	NaN	NaN	NaN	NaN	NaN	NaN	5	NaN	5	5
501	'>gi|4507813|ref|NP_003350.1| UDP-glucose 6-dehydrogenase isoform 1 [Homo sapiens]'	NaN	NaN	NaN	NaN	5	NaN	NaN	NaN	5	5
502	'>gi|48762920|ref|NP_002617.3| ATP-dependent 6-phosphofructokinase, liver type isoform b [Homo sapiens]'	NaN	NaN	NaN	NaN	5	NaN	NaN	NaN	5	5
503	'>gi|51477714|ref|NP_002363.2| alpha-mannosidase 2 [Homo sapiens]'	NaN	NaN	5	NaN	NaN	NaN	NaN	NaN	5	5
504	'>gi|533112488|ref|NP_001269209.1| pyrroline-5-carboxylate reductase 1, mitochondrial isoform 1 [Homo sapiens]'	NaN	NaN	NaN	NaN	NaN	NaN	5	NaN	5	5
505	'>gi|5453634|ref|NP_006132.1| cytoplasmic dynein 1 light intermediate chain 2 isoform 1 [Homo sapiens]'	NaN	NaN	NaN	NaN	5	NaN	NaN	NaN	5	5
506	'>gi|55770888|ref|NP_003557.2| early endosome antigen 1 [Homo sapiens]'	NaN	NaN	5	NaN	NaN	NaN	NaN	NaN	5	5
507	'>gi|578801314|ref|XP_006711531.1| PREDICTED: protein S100-A14 isoform X2 [Homo sapiens]'	NaN	NaN	NaN	NaN	5	NaN	NaN	NaN	5	5
508	'>gi|63079718|ref|NP_542432.2| three prime repair exonuclease 2 [Homo sapiens]'	NaN	NaN	NaN	5	NaN	NaN	NaN	NaN	5	5
509	'>gi|72534712|ref|NP_001026881.1| endoplasmic reticulum-Golgi intermediate compartment protein 1 [Homo sapiens]'	NaN	NaN	NaN	NaN	NaN	5	NaN	NaN	5	5
510	'>gi|8922712|ref|NP_060713.1| septin-11 [Homo sapiens]'	NaN	NaN	NaN	NaN	5	NaN	NaN	NaN	5	5
511	'>gi|93277122|ref|NP_002887.2| RNA-binding protein 4 isoform 1 [Homo sapiens]'	NaN	NaN	NaN	NaN	NaN	5	NaN	NaN	5	5
512	'>gi|9665234|ref|NP_062564.1| interleukin-36 gamma isoform 1 [Homo sapiens]'	NaN	NaN	NaN	5	NaN	NaN	NaN	NaN	5	5
513	'>gi|156523268|ref|NP_689506.2| transcriptional adapter 2-beta [Homo sapiens]'	2	2	NaN	4	2	NaN	NaN	2	4	12
514	'>gi|578815970|ref|XP_006716621.1| PREDICTED: RNA-binding protein 12B isoform X5 [Homo sapiens]'	3	NaN	1	4	NaN	2	NaN	2	4	12
515	'>gi|158937236|ref|NP_006301.3| puromycin-sensitive aminopeptidase [Homo sapiens]'	NaN	NaN	NaN	4	4	NaN	3	NaN	4	11
516	'>gi|189011550|ref|NP_001120977.1| acid ceramidase isoform c [Homo sapiens]'	4	NaN	1	NaN	4	2	NaN	NaN	4	11
517	'>gi|4506179|ref|NP_002777.1| proteasome subunit alpha type-1 isoform 2 [Homo sapiens]'	4	NaN	NaN	NaN	NaN	3	3	NaN	4	10
518	'>gi|5803185|ref|NP_006745.1| synaptophysin-like protein 1 isoform a [Homo sapiens]'	1	NaN	NaN	NaN	1	4	4	NaN	4	10
519	'>gi|23110960|ref|NP_001324.2| cathepsin L2 preproprotein [Homo sapiens]'	4	NaN	NaN	NaN	4	1	NaN	NaN	4	9
520	'>gi|109148552|ref|NP_476429.2| keratin, type II cytoskeletal 3 [Homo sapiens]'	3	NaN	NaN	NaN	4	NaN	NaN	1	4	8
521	'>gi|197116348|ref|NP_001127666.1| prostatic acid phosphatase isoform TM-PAP precursor [Homo sapiens]'	3	NaN	NaN	1	4	NaN	NaN	NaN	4	8
522	'>gi|203098098|ref|NP_065910.3| protein Shroom3 [Homo sapiens]'	4	NaN	NaN	NaN	4	NaN	NaN	NaN	4	8
523	'>gi|311771647|ref|NP_001185709.1| actin-related protein 2/3 complex subunit 4 isoform c [Homo sapiens]'	NaN	NaN	NaN	4	1	NaN	NaN	3	4	8
524	'>gi|42822868|ref|NP_976321.1| ribonuclease inhibitor [Homo sapiens]'	NaN	NaN	1	NaN	4	3	NaN	NaN	4	8
525	'>gi|48255907|ref|NP_001001522.1| transgelin [Homo sapiens]'	NaN	NaN	NaN	NaN	NaN	4	4	NaN	4	8
526	'>gi|7657532|ref|NP_055439.1| protein S100-A6 [Homo sapiens]'	NaN	NaN	NaN	NaN	NaN	NaN	4	4	4	8
527	'>Reverse >gi|304434526|ref|NP_001073966.2| multiple epidermal growth factor-like domains protein 9 precursor [Homo sapiens]'	NaN	NaN	NaN	3	NaN	4	NaN	NaN	4	7
528	'>Reverse >gi|597709777|ref|NP_001243000.2| E3 ubiquitin-protein ligase RNF213 isoform 3 [Homo sapiens]'	NaN	NaN	3	NaN	NaN	NaN	4	NaN	4	7
529	'>gi|161169015|ref|NP_001104488.1| neuron navigator 2 isoform 3 [Homo sapiens]'	NaN	NaN	1	NaN	2	4	NaN	NaN	4	7
530	'>gi|28827815|ref|NP_789793.1| protein S100-A7A [Homo sapiens]'	NaN	NaN	NaN	1	NaN	2	NaN	4	4	7
531	'>gi|34098946|ref|NP_004550.2| nuclease-sensitive element-binding protein 1 [Homo sapiens]'	NaN	NaN	NaN	NaN	3	4	NaN	NaN	4	7
532	'>gi|374093203|ref|NP_001243354.1| PDZ and LIM domain protein 5 isoform c [Homo sapiens]'	NaN	NaN	NaN	NaN	NaN	3	4	NaN	4	7
533	'>gi|4557565|ref|NP_000115.1| DNA excision repair protein ERCC-6 [Homo sapiens]'	4	NaN	NaN	3	NaN	NaN	NaN	NaN	4	7
534	'>gi|5031635|ref|NP_005498.1| cofilin-1 [Homo sapiens]'	NaN	NaN	NaN	4	NaN	NaN	3	NaN	4	7
535	'>Reverse >gi|282165810|ref|NP_001163887.1| tight junction protein ZO-2 isoform 3 [Homo sapiens]'	NaN	NaN	NaN	NaN	NaN	NaN	4	2	4	6
536	'>Reverse >gi|54112403|ref|NP_060250.2| chromodomain-helicase-DNA-binding protein 7 [Homo sapiens]'	NaN	NaN	2	NaN	NaN	NaN	NaN	4	4	6
537	'''>gi|206597515|ref|NP_001128662.1| arf-GAP with Rho-GAP domain, ANK repeat and PH domain-containing protein 1 isoform d [Homo sap...'' <Preview truncated at 128 characters>'	NaN	NaN	4	NaN	2	NaN	NaN	NaN	4	6
538	'>gi|22538465|ref|NP_002786.2| proteasome subunit beta type-3 [Homo sapiens]'	2	NaN	NaN	NaN	NaN	NaN	4	NaN	4	6
539	'>gi|388240772|ref|NP_001252520.1| reticulon-3 isoform g [Homo sapiens]'	NaN	NaN	NaN	NaN	NaN	NaN	2	4	4	6
540	'''>gi|410170418|ref|XP_003959962.1| PREDICTED: arf-GAP with GTPase, ANK repeat and PH domain-containing protein 2-like [Homo sapie...'' <Preview truncated at 128 characters>'	NaN	2	NaN	NaN	NaN	NaN	4	NaN	4	6
541	'>gi|4503987|ref|NP_003869.1| gamma-glutamyl hydrolase precursor [Homo sapiens]'	NaN	NaN	NaN	NaN	2	NaN	NaN	4	4	6
542	'>gi|4504505|ref|NP_000405.1| peroxisomal multifunctional enzyme type 2 isoform 2 [Homo sapiens]'	NaN	NaN	NaN	NaN	4	NaN	NaN	2	4	6
543	'>gi|4506193|ref|NP_002784.1| proteasome subunit beta type-1 [Homo sapiens]'	NaN	NaN	NaN	NaN	NaN	2	4	NaN	4	6
544	'>gi|4506631|ref|NP_000980.1| 60S ribosomal protein L30 [Homo sapiens]'	NaN	NaN	NaN	NaN	NaN	NaN	2	4	4	6
545	'>gi|538919948|ref|NP_001269333.1| malate dehydrogenase, mitochondrial isoform 3 [Homo sapiens]'	NaN	NaN	NaN	4	2	NaN	NaN	NaN	4	6
546	'>gi|5453998|ref|NP_006382.1| importin-7 [Homo sapiens]'	NaN	NaN	2	4	NaN	NaN	NaN	NaN	4	6
547	'>sp|K22E_HUMAN|(Common contaminant protein)'	NaN	NaN	NaN	NaN	2	NaN	NaN	4	4	6
548	'>gi|114431246|ref|NP_853513.2| keratin, type I cytoskeletal 28 [Homo sapiens]'	NaN	4	NaN	NaN	NaN	NaN	1	NaN	4	5
549	'>gi|229091322|ref|NP_001153199.1| putative phospholipase B-like 2 isoform 2 precursor [Homo sapiens]'	NaN	NaN	NaN	NaN	4	NaN	1	NaN	4	5
550	'>gi|23110942|ref|NP_002781.2| proteasome subunit alpha type-5 isoform 1 [Homo sapiens]'	4	NaN	NaN	NaN	1	NaN	NaN	NaN	4	5
551	'>gi|32401427|ref|NP_110426.4| protein YIPF5 isoform a [Homo sapiens]'	NaN	NaN	NaN	NaN	NaN	1	4	NaN	4	5
552	'>gi|385298707|ref|NP_001245288.1| hippocalcin-like protein 1 [Homo sapiens]'	NaN	NaN	NaN	NaN	NaN	1	4	NaN	4	5
553	'>gi|530431917|ref|XP_005277372.1| PREDICTED: 40S ribosomal protein S9 isoform X14 [Homo sapiens]'	NaN	NaN	NaN	1	NaN	NaN	NaN	4	4	5
554	'>gi|550544224|ref|NP_001272389.1| ras GTPase-activating-like protein IQGAP2 isoform 2 [Homo sapiens]'	NaN	NaN	4	1	NaN	NaN	NaN	NaN	4	5
555	'>gi|5803165|ref|NP_006799.1| protein transport protein Sec61 subunit beta [Homo sapiens]'	NaN	NaN	NaN	1	NaN	NaN	NaN	4	4	5
556	'>gi|73466520|ref|NP_001026976.1| fatty aldehyde dehydrogenase isoform 1 [Homo sapiens]'	NaN	NaN	NaN	1	4	NaN	NaN	NaN	4	5
557	'>Reverse >gi|225690502|ref|NP_001139500.1| junctophilin-4 [Homo sapiens]'	NaN	NaN	4	NaN	NaN	NaN	NaN	NaN	4	4
558	'>Reverse >gi|23097308|ref|NP_149062.1| nesprin-1 isoform 2 [Homo sapiens]'	NaN	NaN	4	NaN	NaN	NaN	NaN	NaN	4	4
559	'>Reverse >gi|530419811|ref|XP_005261530.1| PREDICTED: bromodomain-containing protein 1 isoform X4 [Homo sapiens]'	4	NaN	NaN	NaN	NaN	NaN	NaN	NaN	4	4
560	'>Reverse >gi|538260577|ref|NP_001269307.1| tripartite motif-containing protein 46 isoform 5 [Homo sapiens]'	NaN	NaN	NaN	NaN	4	NaN	NaN	NaN	4	4
561	'>gi|110611228|ref|NP_009055.2| utrophin [Homo sapiens]'	NaN	NaN	NaN	NaN	4	NaN	NaN	NaN	4	4
562	'>gi|113722120|ref|NP_115495.3| G-protein coupled receptor 98 precursor [Homo sapiens]'	NaN	4	NaN	NaN	NaN	NaN	NaN	NaN	4	4
563	'>gi|116812591|ref|NP_008964.3| protein RER1 [Homo sapiens]'	NaN	NaN	NaN	NaN	NaN	NaN	4	NaN	4	4
564	'>gi|122937275|ref|NP_001073907.1| alpha 1,3-galactosyltransferase 2 [Homo sapiens]'	NaN	NaN	4	NaN	NaN	NaN	NaN	NaN	4	4
565	'>gi|133925811|ref|NP_002261.3| transportin-1 isoform 1 [Homo sapiens]'	NaN	NaN	NaN	4	NaN	NaN	NaN	NaN	4	4
566	'>gi|151101292|ref|NP_110382.3| thioredoxin-related transmembrane protein 1 precursor [Homo sapiens]'	NaN	NaN	NaN	NaN	NaN	4	NaN	NaN	4	4
567	'>gi|157389005|ref|NP_001739.2| calpain-2 catalytic subunit isoform 1 [Homo sapiens]'	NaN	NaN	NaN	NaN	4	NaN	NaN	NaN	4	4
568	'>gi|169404009|ref|NP_003135.2| translocon-associated protein subunit alpha isoform 1 precursor [Homo sapiens]'	NaN	NaN	NaN	NaN	NaN	4	NaN	NaN	4	4
569	'>gi|189011548|ref|NP_808592.2| acid ceramidase isoform a preproprotein [Homo sapiens]'	NaN	NaN	NaN	NaN	NaN	NaN	NaN	4	4	4
570	'>gi|197313732|ref|NP_001127911.1| pleckstrin homology-like domain family B member 2 isoform a [Homo sapiens]'	NaN	NaN	4	NaN	NaN	NaN	NaN	NaN	4	4
571	'>gi|19923483|ref|NP_057406.2| ras-related protein Rab-14 [Homo sapiens]'	NaN	NaN	NaN	NaN	NaN	NaN	4	NaN	4	4
572	'>gi|19923790|ref|NP_036546.2| rab3 GTPase-activating protein non-catalytic subunit [Homo sapiens]'	NaN	NaN	4	NaN	NaN	NaN	NaN	NaN	4	4
573	'>gi|21327705|ref|NP_644806.1| kallikrein-7 isoform 1 preproprotein [Homo sapiens]'	NaN	NaN	NaN	NaN	NaN	NaN	4	NaN	4	4
574	'>gi|21361322|ref|NP_006078.2| tubulin beta-4A chain isoform 3 [Homo sapiens]'	NaN	NaN	NaN	NaN	4	NaN	NaN	NaN	4	4
575	'>gi|225703079|ref|NP_077274.3| lysophospholipid acyltransferase 7 isoform 1 [Homo sapiens]'	NaN	NaN	NaN	NaN	NaN	4	NaN	NaN	4	4
576	'>gi|238908501|ref|NP_001154178.1| sciellin isoform 3 [Homo sapiens]'	NaN	NaN	NaN	4	NaN	NaN	NaN	NaN	4	4
577	'>gi|308387374|ref|NP_001184147.1| cAMP-specific 3'',5''-cyclic phosphodiesterase 4D isoform PDE4D5 [Homo sapiens]'	NaN	4	NaN	NaN	NaN	NaN	NaN	NaN	4	4
578	'>gi|315013542|ref|NP_001186652.1| cellular retinoic acid-binding protein 2 [Homo sapiens]'	NaN	NaN	NaN	4	NaN	NaN	NaN	NaN	4	4
579	'>gi|31563524|ref|NP_852667.1| myosin regulatory light polypeptide 9 isoform b [Homo sapiens]'	NaN	NaN	NaN	4	NaN	NaN	NaN	NaN	4	4
580	'>gi|321267511|ref|NP_001189431.1| protein NipSnap homolog 1 isoform 2 [Homo sapiens]'	NaN	NaN	NaN	NaN	NaN	4	NaN	NaN	4	4
581	'>gi|332688231|ref|NP_001193875.1| phosphatidylinositol-binding clathrin assembly protein isoform 3 [Homo sapiens]'	NaN	NaN	NaN	NaN	4	NaN	NaN	NaN	4	4
582	'>gi|34485706|ref|NP_899057.1| ras-related protein Rab-27A [Homo sapiens]'	NaN	NaN	NaN	NaN	NaN	NaN	4	NaN	4	4
583	'>gi|358030308|ref|NP_001239589.1| band 4.1-like protein 2 isoform d [Homo sapiens]'	NaN	NaN	4	NaN	NaN	NaN	NaN	NaN	4	4
584	'>gi|36029914|ref|NP_079330.2| deubiquitinating protein VCIP135 [Homo sapiens]'	NaN	4	NaN	NaN	NaN	NaN	NaN	NaN	4	4
585	'>gi|388454220|ref|NP_001252541.1| CCR4-NOT transcription complex subunit 1 isoform c [Homo sapiens]'	NaN	NaN	NaN	NaN	4	NaN	NaN	NaN	4	4
586	'>gi|39777597|ref|NP_004604.2| protein-glutamine gamma-glutamyltransferase 2 isoform a [Homo sapiens]'	NaN	NaN	NaN	NaN	4	NaN	NaN	NaN	4	4
587	'>gi|40805858|ref|NP_954993.1| isthmin-2 isoform 1 precursor [Homo sapiens]'	NaN	NaN	NaN	4	NaN	NaN	NaN	NaN	4	4
588	'>gi|41393547|ref|NP_056993.2| neuroblastoma-amplified sequence [Homo sapiens]'	NaN	4	NaN	NaN	NaN	NaN	NaN	NaN	4	4
589	'>gi|42518068|ref|NP_006455.2| trans-Golgi network integral membrane protein 2 isoform 1 precursor [Homo sapiens]'	NaN	NaN	NaN	4	NaN	NaN	NaN	NaN	4	4
590	'>gi|42558246|ref|NP_872357.2| lysocardiolipin acyltransferase 1 isoform 1 [Homo sapiens]'	NaN	NaN	NaN	NaN	NaN	4	NaN	NaN	4	4
591	'>gi|425876796|ref|NP_001182220.2| serpin B6 isoform b [Homo sapiens]'	NaN	NaN	NaN	NaN	NaN	4	NaN	NaN	4	4
592	'>gi|42822866|ref|NP_976323.1| ribonuclease inhibitor [Homo sapiens]'	NaN	NaN	NaN	NaN	4	NaN	NaN	NaN	4	4
593	'>gi|4502107|ref|NP_001145.1| annexin A5 [Homo sapiens]'	NaN	NaN	NaN	4	NaN	NaN	NaN	NaN	4	4
594	'>gi|4502261|ref|NP_000479.1| antithrombin-III precursor [Homo sapiens]'	NaN	NaN	NaN	NaN	NaN	NaN	NaN	4	4	4
595	'>gi|4503475|ref|NP_001949.1| elongation factor 1-alpha 2 [Homo sapiens]'	4	NaN	NaN	NaN	NaN	NaN	NaN	NaN	4	4
596	'>gi|4503509|ref|NP_003741.1| eukaryotic translation initiation factor 3 subunit A [Homo sapiens]'	NaN	NaN	4	NaN	NaN	NaN	NaN	NaN	4	4
597	'>gi|4503515|ref|NP_003747.1| eukaryotic translation initiation factor 3 subunit H [Homo sapiens]'	NaN	NaN	NaN	NaN	NaN	4	NaN	NaN	4	4
598	'>gi|4503529|ref|NP_001407.1| eukaryotic initiation factor 4A-I isoform 1 [Homo sapiens]'	NaN	NaN	NaN	NaN	4	NaN	NaN	NaN	4	4
599	'>gi|4504523|ref|NP_002148.1| 10 kDa heat shock protein, mitochondrial [Homo sapiens]'	NaN	NaN	NaN	4	NaN	NaN	NaN	NaN	4	4
600	'>gi|4505257|ref|NP_002435.1| moesin [Homo sapiens]'	NaN	NaN	NaN	4	NaN	NaN	NaN	NaN	4	4
601	'>gi|4506201|ref|NP_002788.1| proteasome subunit beta type-5 isoform 1 [Homo sapiens]'	NaN	NaN	NaN	NaN	NaN	NaN	4	NaN	4	4
602	'>gi|4506761|ref|NP_002957.1| protein S100-A10 [Homo sapiens]'	NaN	NaN	NaN	NaN	NaN	NaN	NaN	4	4	4
603	'>gi|45439306|ref|NP_001340.2| aspartate--tRNA ligase, cytoplasmic isoform 1 [Homo sapiens]'	NaN	NaN	NaN	NaN	4	NaN	NaN	NaN	4	4
604	'>gi|46249393|ref|NP_001656.2| rho-related GTP-binding protein RhoG precursor [Homo sapiens]'	NaN	NaN	NaN	NaN	NaN	NaN	4	NaN	4	4
605	'>gi|4758950|ref|NP_000933.1| peptidyl-prolyl cis-trans isomerase B precursor [Homo sapiens]'	NaN	NaN	NaN	4	NaN	NaN	NaN	NaN	4	4
606	'>gi|49574502|ref|NP_057327.2| NADH-cytochrome b5 reductase 1 [Homo sapiens]'	NaN	NaN	NaN	NaN	NaN	4	NaN	NaN	4	4
607	'>gi|5031777|ref|NP_005521.1| isocitrate dehydrogenase [NAD] subunit alpha, mitochondrial precursor [Homo sapiens]'	NaN	NaN	NaN	NaN	NaN	4	NaN	NaN	4	4
608	'>gi|5031877|ref|NP_005564.1| lamin-B1 isoform 1 [Homo sapiens]'	NaN	NaN	NaN	4	NaN	NaN	NaN	NaN	4	4
609	'>gi|50345988|ref|NP_001001973.1| ATP synthase subunit gamma, mitochondrial isoform L (liver) precursor [Homo sapiens]'	NaN	NaN	NaN	NaN	NaN	4	NaN	NaN	4	4
610	'>gi|50428938|ref|NP_004308.2| ATPase ASNA1 {ECO:0000255|HAMAP-Rule:MF_03112} [Homo sapiens]'	NaN	NaN	NaN	NaN	NaN	4	NaN	NaN	4	4
611	'>gi|510025481|ref|NP_001265367.1| fibronectin type-III domain-containing protein 3A isoform 1 [Homo sapiens]'	NaN	NaN	4	NaN	NaN	NaN	NaN	NaN	4	4
612	'>gi|51036603|ref|NP_061329.3| guanine nucleotide-binding protein G(I)/G(S)/G(O) subunit gamma-12 precursor [Homo sapiens]'	NaN	NaN	NaN	NaN	NaN	NaN	NaN	4	4	4
613	'>gi|530368861|ref|XP_005264105.1| PREDICTED: mitogen-activated protein kinase kinase kinase kinase 4 isoform X5 [Homo sapiens]'	NaN	NaN	4	NaN	NaN	NaN	NaN	NaN	4	4
614	'>gi|5453603|ref|NP_006422.1| T-complex protein 1 subunit beta isoform 1 [Homo sapiens]'	NaN	NaN	NaN	NaN	4	NaN	NaN	NaN	4	4
615	'>gi|5454140|ref|NP_006283.1| tumor susceptibility gene 101 protein [Homo sapiens]'	NaN	NaN	NaN	NaN	4	NaN	NaN	NaN	4	4
616	'>gi|554790263|ref|NP_001272985.1| calponin-3 isoform 3 [Homo sapiens]'	NaN	NaN	NaN	NaN	NaN	4	NaN	NaN	4	4
617	'>gi|559098473|ref|NP_001273975.1| endophilin-B2 isoform b [Homo sapiens]'	NaN	NaN	NaN	NaN	4	NaN	NaN	NaN	4	4
618	'>gi|567757558|ref|NP_001274666.1| protein SETSIP [Homo sapiens]'	NaN	NaN	NaN	4	NaN	NaN	NaN	NaN	4	4
619	'>gi|5729875|ref|NP_006658.1| membrane-associated progesterone receptor component 1 isoform 1 [Homo sapiens]'	NaN	NaN	NaN	NaN	NaN	NaN	4	NaN	4	4
620	'>gi|578810391|ref|XP_006714694.1| PREDICTED: probable glutathione peroxidase 8 isoform X1 [Homo sapiens]'	NaN	NaN	NaN	NaN	NaN	NaN	4	NaN	4	4
621	'>gi|578846507|ref|XP_006726810.1| PREDICTED: uncharacterized protein LOC102723805 isoform X1 [Homo sapiens]'	NaN	NaN	4	NaN	NaN	NaN	NaN	NaN	4	4
622	'>gi|5803187|ref|NP_006746.1| transaldolase [Homo sapiens]'	NaN	NaN	NaN	4	NaN	NaN	NaN	NaN	4	4
623	'>gi|6005830|ref|NP_009114.1| plakophilin-3 [Homo sapiens]'	NaN	NaN	NaN	4	NaN	NaN	NaN	NaN	4	4
624	'>gi|609878488|ref|NP_001278320.1| transcriptional regulator ERG isoform 7 [Homo sapiens]'	NaN	NaN	NaN	NaN	4	NaN	NaN	NaN	4	4
625	'>gi|666335594|ref|NP_001287955.1| tight junction protein ZO-1 isoform d [Homo sapiens]'	NaN	NaN	4	NaN	NaN	NaN	NaN	NaN	4	4
626	'>gi|87159836|ref|NP_001034581.1| four and a half LIM domains protein 2 [Homo sapiens]'	NaN	NaN	NaN	NaN	NaN	4	NaN	NaN	4	4
627	'>gi|8922601|ref|NP_060654.1| ADP-ribosylation factor-like protein 8B [Homo sapiens]'	NaN	NaN	NaN	NaN	NaN	NaN	NaN	4	4	4
628	'>gi|91807125|ref|NP_001035109.1| protein FAM3C precursor [Homo sapiens]'	NaN	NaN	NaN	NaN	NaN	NaN	4	NaN	4	4
629	'>gi|4557699|ref|NP_000214.1| keratin, type I cytoskeletal 12 [Homo sapiens]'	3	2	2	2	3	2	3	NaN	3	17
630	'>gi|50540545|ref|NP_055739.2| beclin 1-associated autophagy-related key regulator [Homo sapiens]'	2	3	2	NaN	NaN	1	3	3	3	14
631	'>gi|67003568|ref|NP_001019850.1| skin-specific protein 32 [Homo sapiens]'	2	2	NaN	3	NaN	1	1	1	3	10
632	'>gi|4505893|ref|NP_002659.1| proteolipid protein 2 [Homo sapiens]'	1	NaN	NaN	1	NaN	NaN	3	3	3	8
633	'>gi|460417294|ref|NP_001264069.1| actin-related protein 3 isoform 2 [Homo sapiens]'	NaN	NaN	NaN	3	3	NaN	NaN	2	3	8
634	'>gi|83700235|ref|NP_001958.2| eukaryotic initiation factor 4A-II [Homo sapiens]'	NaN	NaN	NaN	2	NaN	1	2	3	3	8
635	'>gi|34419635|ref|NP_002146.2| heat shock 70 kDa protein 6 [Homo sapiens]'	NaN	NaN	1	3	2	NaN	NaN	1	3	7
636	'>gi|4506203|ref|NP_002790.1| proteasome subunit beta type-7 proprotein [Homo sapiens]'	3	NaN	NaN	NaN	NaN	1	3	NaN	3	7
637	'''>gi|522023554|ref|NP_001265571.1| EGF-like repeat and discoidin I-like domain-containing protein 3 isoform 2 precursor [Homo sap...'' <Preview truncated at 128 characters>'	NaN	2	NaN	NaN	2	3	NaN	NaN	3	7
638	'>gi|126157508|ref|NP_996898.2| inactive N-acetylated-alpha-linked acidic dipeptidase-like protein 2 [Homo sapiens]'	NaN	3	1	NaN	NaN	NaN	2	NaN	3	6
639	'>gi|164519138|ref|NP_001106819.1| endothelin-converting enzyme 1 isoform 4 [Homo sapiens]'	NaN	NaN	3	3	NaN	NaN	NaN	NaN	3	6
640	'>gi|260099676|ref|NP_001159418.1| insulin-degrading enzyme isoform 2 [Homo sapiens]'	NaN	NaN	NaN	NaN	NaN	3	2	1	3	6
641	'>gi|528078329|ref|NP_001268446.1| centrosomal protein of 85 kDa isoform 2 [Homo sapiens]'	NaN	NaN	NaN	3	3	NaN	NaN	NaN	3	6
642	'>gi|530417433|ref|XP_005259401.1| PREDICTED: centrosomal protein of 89 kDa isoform X2 [Homo sapiens]'	NaN	NaN	3	NaN	3	NaN	NaN	NaN	3	6
643	'>gi|5454166|ref|NP_006361.1| vesicle transport through interaction with t-SNAREs homolog 1B [Homo sapiens]'	NaN	NaN	NaN	NaN	NaN	3	3	NaN	3	6
644	'>Reverse >gi|4503355|ref|NP_001371.1| dedicator of cytokinesis protein 1 isoform 2 [Homo sapiens]'	2	NaN	NaN	NaN	3	NaN	NaN	NaN	3	5
645	'>gi|14043070|ref|NP_112420.1| heterogeneous nuclear ribonucleoprotein A1 isoform b [Homo sapiens]'	NaN	NaN	NaN	2	NaN	3	NaN	NaN	3	5
646	'>gi|14165439|ref|NP_002131.2| heterogeneous nuclear ribonucleoprotein K isoform a [Homo sapiens]'	NaN	NaN	NaN	2	3	NaN	NaN	NaN	3	5
647	'>gi|221316614|ref|NP_004416.2| extracellular matrix protein 1 isoform 1 precursor [Homo sapiens]'	3	NaN	NaN	1	1	NaN	NaN	NaN	3	5
648	'>gi|394025725|ref|NP_001257377.1| very long-chain specific acyl-CoA dehydrogenase, mitochondrial isoform 4 [Homo sapiens]'	NaN	NaN	2	3	NaN	NaN	NaN	NaN	3	5
649	'>gi|429836877|ref|NP_001258847.1| signal peptidase complex catalytic subunit SEC11A isoform 5 [Homo sapiens]'	NaN	NaN	NaN	NaN	NaN	NaN	2	3	3	5
650	'>gi|7661922|ref|NP_055814.1| ras-related protein Rab-21 [Homo sapiens]'	NaN	NaN	NaN	NaN	NaN	2	3	NaN	3	5
651	'>Reverse >gi|315221143|ref|NP_001186726.1| tyrosine-protein phosphatase non-receptor type 7 isoform 3 [Homo sapiens]'	NaN	NaN	NaN	NaN	1	NaN	3	NaN	3	4
652	'>gi|119395729|ref|NP_000299.2| lysosomal protective protein isoform a precursor [Homo sapiens]'	3	NaN	NaN	NaN	NaN	1	NaN	NaN	3	4
653	'''>gi|194688149|ref|NP_001124164.1| serine/threonine-protein phosphatase 2B catalytic subunit alpha isoform isoform 3 [Homo sapien...'' <Preview truncated at 128 characters>'	NaN	NaN	NaN	NaN	3	1	NaN	NaN	3	4
654	'>gi|209862883|ref|NP_001129513.1| histone deacetylase 11 isoform 2 [Homo sapiens]'	NaN	NaN	3	NaN	1	NaN	NaN	NaN	3	4
655	'>gi|22538437|ref|NP_680093.1| cathepsin B preproprotein [Homo sapiens]'	NaN	NaN	NaN	NaN	3	NaN	1	NaN	3	4
656	'>gi|23110925|ref|NP_002789.1| proteasome subunit beta type-6 isoform 1 proprotein [Homo sapiens]'	NaN	NaN	NaN	NaN	NaN	NaN	3	1	3	4
657	'>gi|24475816|ref|NP_612510.1| very-long-chain enoyl-CoA reductase [Homo sapiens]'	NaN	NaN	NaN	NaN	NaN	1	NaN	3	3	4
658	'>gi|27777657|ref|NP_776249.1| serpin A12 precursor [Homo sapiens]'	3	1	NaN	NaN	NaN	NaN	NaN	NaN	3	4
659	'>gi|315139006|ref|NP_001186708.1| proteasome subunit beta type-2 isoform 2 [Homo sapiens]'	NaN	NaN	NaN	NaN	1	NaN	3	NaN	3	4
660	'>gi|315360622|ref|NP_001186746.1| gamma-glutamylcyclotransferase isoform 4 [Homo sapiens]'	NaN	1	3	NaN	NaN	NaN	NaN	NaN	3	4
661	'>gi|4506613|ref|NP_000974.1| 60S ribosomal protein L22 proprotein [Homo sapiens]'	NaN	NaN	NaN	1	NaN	NaN	NaN	3	3	4
662	'>gi|530402381|ref|XP_005266454.1| PREDICTED: LIM domain only protein 7 isoform X23 [Homo sapiens]'	NaN	NaN	NaN	3	NaN	NaN	1	NaN	3	4
663	'>gi|530411966|ref|XP_005257299.1| PREDICTED: polymerase I and transcript release factor isoform X2 [Homo sapiens]'	NaN	NaN	NaN	NaN	NaN	NaN	1	3	3	4
664	'>gi|578805299|ref|XP_006712951.1| PREDICTED: ankyrin repeat domain-containing protein 36C isoform X1 [Homo sapiens]'	NaN	NaN	NaN	NaN	NaN	3	NaN	1	3	4
665	'>Reverse >gi|116805332|ref|NP_005089.2| musculin [Homo sapiens]'	NaN	NaN	NaN	NaN	3	NaN	NaN	NaN	3	3
666	'>Reverse >gi|117606355|ref|NP_075463.2| protein furry homolog [Homo sapiens]'	NaN	NaN	3	NaN	NaN	NaN	NaN	NaN	3	3
667	'>Reverse >gi|194239709|ref|NP_001123522.1| dedicator of cytokinesis protein 9 isoform d [Homo sapiens]'	NaN	NaN	NaN	3	NaN	NaN	NaN	NaN	3	3
668	'>Reverse >gi|197333695|ref|NP_001127949.1| poly(A)-specific ribonuclease PARN isoform 2 [Homo sapiens]'	NaN	NaN	NaN	NaN	NaN	3	NaN	NaN	3	3
669	'>Reverse >gi|312434011|ref|NP_001186084.1| histone acetyltransferase KAT7 isoform 2 [Homo sapiens]'	NaN	NaN	3	NaN	NaN	NaN	NaN	NaN	3	3
670	'>Reverse >gi|32469509|ref|NP_862825.1| zinc finger and BTB domain-containing protein 12 [Homo sapiens]'	NaN	NaN	3	NaN	NaN	NaN	NaN	NaN	3	3
671	'>Reverse >gi|40255149|ref|NP_694945.2| rho guanine nucleotide exchange factor 19 [Homo sapiens]'	NaN	NaN	NaN	NaN	NaN	NaN	3	NaN	3	3
672	'>Reverse >gi|4502659|ref|NP_003821.1| sialic acid-binding Ig-like lectin 5 precursor [Homo sapiens]'	NaN	3	NaN	NaN	NaN	NaN	NaN	NaN	3	3
673	'>Reverse >gi|530374326|ref|XP_005247370.1| PREDICTED: target of Nesh-SH3 isoform X33 [Homo sapiens]'	NaN	NaN	NaN	NaN	NaN	NaN	3	NaN	3	3
674	'>Reverse >gi|530414438|ref|XP_005259765.1| PREDICTED: histone-arginine methyltransferase CARM1 isoform X1 [Homo sapiens]'	NaN	NaN	NaN	NaN	3	NaN	NaN	NaN	3	3
675	'>Reverse >gi|7706457|ref|NP_057332.1| A-kinase anchor protein 11 [Homo sapiens]'	NaN	NaN	NaN	NaN	NaN	3	NaN	NaN	3	3
676	'>gi|10190712|ref|NP_065723.1| protein S100-A14 [Homo sapiens]'	NaN	NaN	NaN	NaN	NaN	NaN	NaN	3	3	3
677	'>gi|109148522|ref|NP_001035835.1| insulin, isoform 2 precursor [Homo sapiens]'	NaN	3	NaN	NaN	NaN	NaN	NaN	NaN	3	3
678	'>gi|109452587|ref|NP_775882.2| protein FAM98B [Homo sapiens]'	NaN	NaN	NaN	NaN	NaN	NaN	NaN	3	3	3
679	'>gi|11055992|ref|NP_067639.1| retinoid-inducible serine carboxypeptidase precursor [Homo sapiens]'	NaN	NaN	NaN	NaN	NaN	3	NaN	NaN	3	3
680	'>gi|115387104|ref|NP_000687.3| 4-trimethylaminobutyraldehyde dehydrogenase [Homo sapiens]'	NaN	NaN	NaN	NaN	3	NaN	NaN	NaN	3	3
681	'>gi|115527097|ref|NP_006026.3| serine/threonine-protein kinase MRCK beta [Homo sapiens]'	NaN	NaN	3	NaN	NaN	NaN	NaN	NaN	3	3
682	'>gi|116256358|ref|NP_004857.4| secretory carrier-associated membrane protein 1 isoform 1 [Homo sapiens]'	NaN	NaN	NaN	NaN	NaN	3	NaN	NaN	3	3
683	'>gi|118600961|ref|NP_065076.2| ral GTPase-activating protein subunit alpha-2 [Homo sapiens]'	NaN	NaN	3	NaN	NaN	NaN	NaN	NaN	3	3
684	'>gi|119943112|ref|NP_001351.2| 7-dehydrocholesterol reductase [Homo sapiens]'	NaN	NaN	NaN	NaN	NaN	3	NaN	NaN	3	3
685	'>gi|124494247|ref|NP_001074419.1| unconventional myosin-Ic isoform b [Homo sapiens]'	NaN	NaN	NaN	3	NaN	NaN	NaN	NaN	3	3
686	'>gi|127139033|ref|NP_000932.3| NADPH--cytochrome P450 reductase [Homo sapiens]'	NaN	NaN	NaN	NaN	3	NaN	NaN	NaN	3	3
687	'>gi|13124879|ref|NP_002465.1| myosin-11 isoform SM1A [Homo sapiens]'	NaN	3	NaN	NaN	NaN	NaN	NaN	NaN	3	3
688	'>gi|145587088|ref|NP_954974.2| protein FAM179A [Homo sapiens]'	NaN	NaN	NaN	NaN	3	NaN	NaN	NaN	3	3
689	'>gi|148536830|ref|NP_004027.2| adenylate cyclase type 3 [Homo sapiens]'	NaN	NaN	NaN	NaN	3	NaN	NaN	NaN	3	3
690	'>gi|150421684|ref|NP_056020.2| probable phospholipid-transporting ATPase IH isoform a [Homo sapiens]'	NaN	NaN	NaN	3	NaN	NaN	NaN	NaN	3	3
691	'>gi|15208660|ref|NP_003132.2| E3 ubiquitin-protein ligase TRIM21 [Homo sapiens]'	NaN	NaN	NaN	NaN	3	NaN	NaN	NaN	3	3
692	'>gi|153945790|ref|NP_002463.2| myosin-8 [Homo sapiens]'	NaN	3	NaN	NaN	NaN	NaN	NaN	NaN	3	3
693	'>gi|15431316|ref|NP_149034.2| keratin, type II cuticular Hb4 [Homo sapiens]'	NaN	NaN	NaN	NaN	NaN	NaN	3	NaN	3	3
694	'>gi|154354990|ref|NP_055730.2| ankyrin repeat domain-containing protein 26 isoform 1 [Homo sapiens]'	NaN	3	NaN	NaN	NaN	NaN	NaN	NaN	3	3
695	'>gi|157738667|ref|NP_078789.2| FYVE and coiled-coil domain-containing protein 1 [Homo sapiens]'	NaN	NaN	3	NaN	NaN	NaN	NaN	NaN	3	3
696	'>gi|157739864|ref|NP_001099032.1| ubiquitin conjugation factor E4 B isoform 1 [Homo sapiens]'	NaN	3	NaN	NaN	NaN	NaN	NaN	NaN	3	3
697	'>gi|16357472|ref|NP_426359.1| cell division control protein 42 homolog isoform 2 [Homo sapiens]'	NaN	NaN	NaN	NaN	NaN	3	NaN	NaN	3	3
698	'>gi|169790833|ref|NP_001116078.1| lysosome-associated membrane glycoprotein 2 isoform C precursor [Homo sapiens]'	NaN	NaN	3	NaN	NaN	NaN	NaN	NaN	3	3
699	'>gi|18201905|ref|NP_000166.2| glucose-6-phosphate isomerase isoform 2 [Homo sapiens]'	NaN	NaN	NaN	3	NaN	NaN	NaN	NaN	3	3
700	'>gi|18677729|ref|NP_570718.1| relaxin receptor 2 isoform 1 [Homo sapiens]'	NaN	NaN	NaN	NaN	3	NaN	NaN	NaN	3	3
701	'>gi|188497750|ref|NP_277035.2| hexokinase-1 isoform HKI-td [Homo sapiens]'	NaN	NaN	NaN	3	NaN	NaN	NaN	NaN	3	3
702	'>gi|190014578|ref|NP_054735.3| phosphatidylinositide phosphatase SAC1 [Homo sapiens]'	NaN	NaN	NaN	NaN	3	NaN	NaN	NaN	3	3
703	'>gi|193211614|ref|NP_001123237.1| sterol-4-alpha-carboxylate 3-dehydrogenase, decarboxylating [Homo sapiens]'	NaN	NaN	NaN	NaN	NaN	3	NaN	NaN	3	3
704	'>gi|194097350|ref|NP_001123476.1| alpha-actinin-1 isoform a [Homo sapiens]'	NaN	NaN	NaN	3	NaN	NaN	NaN	NaN	3	3
705	'>gi|195220720|ref|NP_001124181.1| protein RUFY3 isoform 3 [Homo sapiens]'	NaN	NaN	NaN	NaN	3	NaN	NaN	NaN	3	3
706	'>gi|195972881|ref|NP_001124435.1| transmembrane protein 194A isoform a [Homo sapiens]'	NaN	NaN	NaN	NaN	3	NaN	NaN	NaN	3	3
707	'>gi|20302166|ref|NP_057694.2| toll-like receptor 8 isoform 1 [Homo sapiens]'	3	NaN	NaN	NaN	NaN	NaN	NaN	NaN	3	3
708	'>gi|21166380|ref|NP_620060.1| neurexin-2-beta isoform alpha-2 precursor [Homo sapiens]'	3	NaN	NaN	NaN	NaN	NaN	NaN	NaN	3	3
709	'>gi|21327701|ref|NP_631961.1| TATA-binding protein-associated factor 2N isoform 1 [Homo sapiens]'	NaN	NaN	NaN	NaN	3	NaN	NaN	NaN	3	3
710	'>gi|21327708|ref|NP_631946.1| nucleosome assembly protein 1-like 1 [Homo sapiens]'	NaN	NaN	NaN	NaN	3	NaN	NaN	NaN	3	3
711	'>gi|21687139|ref|NP_660279.1| UDP-GlcNAc:betaGal beta-1,3-N-acetylglucosaminyltransferase 7 [Homo sapiens]'	NaN	NaN	NaN	3	NaN	NaN	NaN	NaN	3	3
712	'>gi|217272890|ref|NP_001136076.1| palmitoyl-protein thioesterase 1 isoform 2 precursor [Homo sapiens]'	NaN	NaN	NaN	NaN	NaN	3	NaN	NaN	3	3
713	'>gi|217416369|ref|NP_001136120.1| GTP-binding protein SAR1a [Homo sapiens]'	NaN	NaN	NaN	NaN	NaN	NaN	3	NaN	3	3
714	'>gi|221307584|ref|NP_001138303.1| prohibitin-2 isoform 1 [Homo sapiens]'	NaN	NaN	NaN	NaN	NaN	3	NaN	NaN	3	3
715	'>gi|226371754|ref|NP_112593.2| katanin p60 ATPase-containing subunit A-like 2 [Homo sapiens]'	NaN	NaN	NaN	3	NaN	NaN	NaN	NaN	3	3
716	'>gi|23110955|ref|NP_004381.2| pro-cathepsin H preproprotein [Homo sapiens]'	NaN	NaN	NaN	NaN	NaN	3	NaN	NaN	3	3
717	'>gi|23238188|ref|NP_690042.1| testin isoform 2 [Homo sapiens]'	NaN	NaN	NaN	NaN	3	NaN	NaN	NaN	3	3
718	'>gi|24430151|ref|NP_002793.2| 26S protease regulatory subunit 4 [Homo sapiens]'	NaN	NaN	NaN	NaN	3	NaN	NaN	NaN	3	3
719	'>gi|24432106|ref|NP_066997.3| cell cycle and apoptosis regulator protein 2 [Homo sapiens]'	NaN	NaN	NaN	3	NaN	NaN	NaN	NaN	3	3
720	'>gi|256222415|ref|NP_001157791.1| filamin-B isoform 4 [Homo sapiens]'	NaN	NaN	NaN	3	NaN	NaN	NaN	NaN	3	3
721	'>gi|281182700|ref|NP_001162578.1| WASH complex subunit FAM21C isoform 3 [Homo sapiens]'	NaN	3	NaN	NaN	NaN	NaN	NaN	NaN	3	3
722	'>gi|282165817|ref|NP_001161302.1| transmembrane emp24 domain-containing protein 5 isoform 2 precursor [Homo sapiens]'	NaN	NaN	NaN	NaN	NaN	NaN	3	NaN	3	3
723	'>gi|28872761|ref|NP_003819.1| myotubularin-related protein 1 [Homo sapiens]'	NaN	NaN	NaN	NaN	3	NaN	NaN	NaN	3	3
724	'>gi|29725609|ref|NP_005219.2| epidermal growth factor receptor isoform a precursor [Homo sapiens]'	NaN	NaN	3	NaN	NaN	NaN	NaN	NaN	3	3
725	'>gi|29789409|ref|NP_777549.1| mimitin, mitochondrial [Homo sapiens]'	NaN	NaN	NaN	NaN	NaN	NaN	3	NaN	3	3
726	'>gi|306922394|ref|NP_207646.2| zinc finger homeobox protein 2 [Homo sapiens]'	NaN	3	NaN	NaN	NaN	NaN	NaN	NaN	3	3
727	'>gi|30795193|ref|NP_848699.1| septin-10 isoform 2 [Homo sapiens]'	NaN	NaN	NaN	NaN	3	NaN	NaN	NaN	3	3
728	'>gi|311771694|ref|NP_001185722.1| ARPC4-TTLL3 fusion protein [Homo sapiens]'	NaN	NaN	NaN	NaN	NaN	NaN	3	NaN	3	3
729	'>gi|31982936|ref|NP_003892.2| sphingosine-1-phosphate lyase 1 [Homo sapiens]'	NaN	NaN	NaN	NaN	3	NaN	NaN	NaN	3	3
730	'>gi|325651952|ref|NP_001191763.1| anoctamin-10 isoform 5 [Homo sapiens]'	NaN	NaN	NaN	NaN	3	NaN	NaN	NaN	3	3
731	'>gi|32967607|ref|NP_002074.2| glutathione peroxidase 2 [Homo sapiens]'	NaN	NaN	NaN	NaN	NaN	3	NaN	NaN	3	3
732	'>gi|347659028|ref|NP_001231639.1| glutamine--fructose-6-phosphate aminotransferase [isomerizing] 1 isoform 1 [Homo sapiens]'	NaN	NaN	NaN	NaN	3	NaN	NaN	NaN	3	3
733	'>gi|371502112|ref|NP_001243064.1| exportin-2 isoform 2 [Homo sapiens]'	NaN	NaN	NaN	3	NaN	NaN	NaN	NaN	3	3
734	'>gi|387527972|ref|NP_001248341.1| dynactin subunit 2 isoform 2 [Homo sapiens]'	NaN	NaN	NaN	NaN	3	NaN	NaN	NaN	3	3
735	'>gi|389565487|ref|NP_001254487.1| programmed cell death protein 6 isoform 4 [Homo sapiens]'	NaN	NaN	NaN	NaN	NaN	NaN	NaN	3	3	3
736	'>gi|394025704|ref|NP_001257368.1| actin-related protein 2/3 complex subunit 5 isoform 2 [Homo sapiens]'	NaN	NaN	NaN	3	NaN	NaN	NaN	NaN	3	3
737	'>gi|401709935|ref|NP_001257906.1| IST1 homolog isoform d [Homo sapiens]'	NaN	NaN	NaN	NaN	3	NaN	NaN	NaN	3	3
738	'>gi|40789233|ref|NP_064708.1| ubiquinone biosynthesis protein COQ9, mitochondrial precursor [Homo sapiens]'	NaN	NaN	NaN	NaN	NaN	3	NaN	NaN	3	3
739	'>gi|40805827|ref|NP_955476.1| coatomer subunit epsilon isoform c [Homo sapiens]'	NaN	NaN	NaN	NaN	NaN	3	NaN	NaN	3	3
740	'>gi|4503519|ref|NP_003745.1| eukaryotic translation initiation factor 3 subunit F [Homo sapiens]'	NaN	NaN	NaN	NaN	3	NaN	NaN	NaN	3	3
741	'>gi|4503521|ref|NP_001559.1| eukaryotic translation initiation factor 3 subunit E [Homo sapiens]'	NaN	NaN	NaN	NaN	3	NaN	NaN	NaN	3	3
742	'>gi|4503937|ref|NP_001474.1| protein NipSnap homolog 2 isoform 1 [Homo sapiens]'	NaN	NaN	NaN	NaN	NaN	NaN	3	NaN	3	3
743	'>gi|4504253|ref|NP_002096.1| histone H2AX [Homo sapiens]'	NaN	NaN	NaN	NaN	NaN	NaN	3	NaN	3	3
744	'>gi|4504279|ref|NP_002098.1| histone H3.3 [Homo sapiens]'	NaN	NaN	NaN	3	NaN	NaN	NaN	NaN	3	3
745	'>gi|4504935|ref|NP_002274.1| keratin, type II cuticular Hb5 isoform 1 [Homo sapiens]'	NaN	3	NaN	NaN	NaN	NaN	NaN	NaN	3	3
746	'>gi|4505357|ref|NP_002480.1| NADH dehydrogenase [ubiquinone] 1 alpha subcomplex subunit 4 [Homo sapiens]'	NaN	NaN	NaN	NaN	NaN	NaN	NaN	3	3	3
747	'>gi|4506667|ref|NP_000993.1| 60S acidic ribosomal protein P0 [Homo sapiens]'	NaN	NaN	NaN	NaN	NaN	3	NaN	NaN	3	3
748	'>gi|4507943|ref|NP_003391.1| exportin-1 [Homo sapiens]'	NaN	NaN	NaN	3	NaN	NaN	NaN	NaN	3	3
749	'>gi|47086907|ref|NP_060309.2| lysophosphatidylcholine acyltransferase 2 [Homo sapiens]'	NaN	NaN	NaN	NaN	3	NaN	NaN	NaN	3	3
750	'>gi|4757818|ref|NP_004879.1| V-type proton ATPase subunit G 1 [Homo sapiens]'	NaN	NaN	NaN	NaN	NaN	NaN	NaN	3	3	3
751	'>gi|4809279|ref|NP_004025.1| annexin A7 isoform 2 [Homo sapiens]'	NaN	NaN	NaN	NaN	3	NaN	NaN	NaN	3	3
752	'>gi|48255937|ref|NP_001001389.1| CD44 antigen isoform 2 precursor [Homo sapiens]'	NaN	NaN	3	NaN	NaN	NaN	NaN	NaN	3	3
753	'>gi|48526509|ref|NP_001001563.1| mitochondrial import inner membrane translocase subunit TIM50 [Homo sapiens]'	NaN	NaN	NaN	NaN	NaN	3	NaN	NaN	3	3
754	'>gi|530375097|ref|XP_005247745.1| PREDICTED: ras GTPase-activating protein 2 isoform X2 [Homo sapiens]'	NaN	NaN	NaN	3	NaN	NaN	NaN	NaN	3	3
755	'>gi|530399159|ref|XP_005253433.1| PREDICTED: cation-dependent mannose-6-phosphate receptor isoform X1 [Homo sapiens]'	NaN	NaN	NaN	NaN	3	NaN	NaN	NaN	3	3
756	'>gi|530401608|ref|XP_005253601.1| PREDICTED: transmembrane emp24 domain-containing protein 2 isoform X1 [Homo sapiens]'	NaN	NaN	NaN	NaN	NaN	3	NaN	NaN	3	3
757	'>gi|530401786|ref|XP_005253685.1| PREDICTED: huntingtin-interacting protein 1-related protein isoform X2 [Homo sapiens]'	NaN	NaN	NaN	3	NaN	NaN	NaN	NaN	3	3
758	'>gi|530405858|ref|XP_005254442.1| PREDICTED: microtubule-associated protein 1A isoform X1 [Homo sapiens]'	NaN	3	NaN	NaN	NaN	NaN	NaN	NaN	3	3
759	'>gi|530406402|ref|XP_005254702.1| PREDICTED: tropomyosin alpha-1 chain isoform X10 [Homo sapiens]'	NaN	NaN	NaN	NaN	NaN	3	NaN	NaN	3	3
760	'>gi|530413107|ref|XP_005257850.1| PREDICTED: synaptogyrin-2 isoform X2 [Homo sapiens]'	NaN	NaN	NaN	NaN	NaN	NaN	3	NaN	3	3
761	'>gi|530415128|ref|XP_005260099.1| PREDICTED: tropomyosin alpha-4 chain isoform X1 [Homo sapiens]'	NaN	NaN	NaN	3	NaN	NaN	NaN	NaN	3	3
762	'>gi|54112390|ref|NP_000713.2| voltage-dependent calcium channel subunit alpha-2/delta-1 precursor [Homo sapiens]'	NaN	NaN	3	NaN	NaN	NaN	NaN	NaN	3	3
763	'>gi|544186046|ref|NP_001269634.1| protein disulfide-isomerase A6 isoform b [Homo sapiens]'	NaN	NaN	NaN	3	NaN	NaN	NaN	NaN	3	3
764	'>gi|544711041|ref|NP_001269836.1| T-complex protein 1 subunit theta isoform 2 [Homo sapiens]'	NaN	NaN	NaN	3	NaN	NaN	NaN	NaN	3	3
765	'>gi|545478466|ref|NP_001269901.1| septin-2 isoform b [Homo sapiens]'	NaN	NaN	NaN	NaN	NaN	3	NaN	NaN	3	3
766	'>gi|557440899|ref|NP_001273490.1| nuclear mitotic apparatus protein 1 isoform 2 [Homo sapiens]'	NaN	NaN	NaN	NaN	NaN	3	NaN	NaN	3	3
767	'>gi|55956788|ref|NP_005372.2| nucleolin [Homo sapiens]'	NaN	NaN	NaN	3	NaN	NaN	NaN	NaN	3	3
768	'>gi|56549125|ref|NP_001005362.1| dynamin-2 isoform 4 [Homo sapiens]'	NaN	NaN	NaN	3	NaN	NaN	NaN	NaN	3	3
769	'>gi|578801661|ref|XP_006711667.1| PREDICTED: ras-related protein Rab-7L1 isoform X6 [Homo sapiens]'	NaN	NaN	NaN	NaN	NaN	NaN	3	NaN	3	3
770	'>gi|578804293|ref|XP_006712576.1| PREDICTED: integrin alpha-V isoform X2 [Homo sapiens]'	NaN	NaN	3	NaN	NaN	NaN	NaN	NaN	3	3
771	'>gi|578806691|ref|XP_006713443.1| PREDICTED: protein bassoon isoform X1 [Homo sapiens]'	NaN	NaN	3	NaN	NaN	NaN	NaN	NaN	3	3
772	'>gi|5802966|ref|NP_006861.1| destrin isoform a [Homo sapiens]'	NaN	NaN	NaN	NaN	NaN	NaN	3	NaN	3	3
773	'>gi|5803040|ref|NP_006849.1| transmembrane emp24 domain-containing protein 1 precursor [Homo sapiens]'	NaN	NaN	NaN	NaN	NaN	3	NaN	NaN	3	3
774	'>gi|594140512|ref|NP_001277241.1| catenin alpha-1 isoform 5 [Homo sapiens]'	NaN	NaN	NaN	3	NaN	NaN	NaN	NaN	3	3
775	'>gi|6005884|ref|NP_009038.1| translocon-associated protein subunit gamma [Homo sapiens]'	NaN	NaN	NaN	NaN	NaN	NaN	3	NaN	3	3
776	'>gi|61966763|ref|NP_001013680.1| pentraxin-4 [Homo sapiens]'	NaN	NaN	NaN	NaN	NaN	NaN	NaN	3	3	3
777	'>gi|63003894|ref|NP_612502.1| coiled-coil domain-containing protein 167 [Homo sapiens]'	NaN	NaN	NaN	NaN	NaN	NaN	3	NaN	3	3
778	'>gi|645912975|ref|NP_001280143.1| tubulin beta chain isoform d [Homo sapiens]'	NaN	NaN	NaN	NaN	3	NaN	NaN	NaN	3	3
779	'>gi|662236841|ref|NP_001284538.1| mitogen-activated protein kinase kinase kinase 6 isoform 2 [Homo sapiens]'	NaN	NaN	3	NaN	NaN	NaN	NaN	NaN	3	3
780	'>gi|7106299|ref|NP_037368.1| ataxin-10 isoform 1 [Homo sapiens]'	NaN	NaN	NaN	NaN	3	NaN	NaN	NaN	3	3
781	'>gi|74099697|ref|NP_001027565.1| heterogeneous nuclear ribonucleoprotein H2 [Homo sapiens]'	NaN	NaN	NaN	NaN	3	NaN	NaN	NaN	3	3
782	'>gi|7657015|ref|NP_055121.1| tRNA-splicing ligase RtcB homolog [Homo sapiens]'	NaN	NaN	NaN	NaN	3	NaN	NaN	NaN	3	3
783	'>gi|88758603|ref|NP_001034673.1| PRKCA-binding protein [Homo sapiens]'	NaN	NaN	NaN	NaN	3	NaN	NaN	NaN	3	3
784	'>sp|K1C10_HUMAN|(Common contaminant protein)'	NaN	NaN	NaN	NaN	NaN	NaN	NaN	3	3	3
785	'>gi|297374821|ref|NP_001172026.1| insulin preproprotein [Homo sapiens]'	1	NaN	2	2	NaN	2	1	2	2	10
786	'>Reverse >gi|187169264|ref|NP_001119601.1| DNA replication complex GINS protein PSF3 isoform a [Homo sapiens]'	NaN	2	NaN	NaN	2	2	NaN	2	2	8
787	'>gi|189409122|ref|NP_690005.2| retroviral-like aspartic protease 1 precursor [Homo sapiens]'	1	NaN	NaN	1	NaN	2	2	2	2	8
788	'>gi|16418361|ref|NP_443091.1| protein RFT1 homolog [Homo sapiens]'	1	NaN	2	NaN	1	1	NaN	NaN	2	5
789	'>gi|170296790|ref|NP_031369.2| trypsin-3 isoform 1 preproprotein [Homo sapiens]'	NaN	1	2	1	1	NaN	NaN	NaN	2	5
790	'>gi|23110944|ref|NP_002782.1| proteasome subunit alpha type-6 isoform a [Homo sapiens]'	1	NaN	NaN	NaN	2	1	1	NaN	2	5
791	'>gi|394953893|ref|NP_001257410.1| proteasome subunit beta type-6 isoform 2 proprotein [Homo sapiens]'	2	NaN	NaN	2	NaN	1	NaN	NaN	2	5
792	'>gi|5453597|ref|NP_006126.1| F-actin-capping protein subunit alpha-1 [Homo sapiens]'	NaN	NaN	NaN	2	1	2	NaN	NaN	2	5
793	'>gi|96975097|ref|NP_057661.3| ras-related protein Rab-6B [Homo sapiens]'	NaN	NaN	NaN	NaN	2	2	NaN	1	2	5
794	'>Reverse >gi|145312241|ref|NP_071330.3| differentially expressed in FDCP 6 homolog [Homo sapiens]'	NaN	NaN	NaN	NaN	1	NaN	1	2	2	4
795	'>gi|13129092|ref|NP_076997.1| transmembrane protein 109 precursor [Homo sapiens]'	NaN	NaN	NaN	NaN	NaN	NaN	2	2	2	4
796	'>gi|146198640|ref|NP_077283.2| glycerophosphodiester phosphodiesterase domain-containing protein 3 [Homo sapiens]'	NaN	NaN	NaN	NaN	1	2	1	NaN	2	4
797	'>gi|155722983|ref|NP_057376.2| heat shock protein 75 kDa, mitochondrial isoform 1 precursor [Homo sapiens]'	NaN	NaN	1	2	1	NaN	NaN	NaN	2	4
798	'>gi|24234699|ref|NP_002267.2| keratin, type I cytoskeletal 19 [Homo sapiens]'	1	NaN	NaN	2	1	NaN	NaN	NaN	2	4
799	'>gi|258613943|ref|NP_001158222.1| aspartyl/asparaginyl beta-hydroxylase isoform f [Homo sapiens]'	NaN	NaN	2	NaN	NaN	2	NaN	NaN	2	4
800	'>gi|312596881|ref|NP_001186092.1| 26S protease regulatory subunit 8 isoform 2 [Homo sapiens]'	NaN	NaN	NaN	2	2	NaN	NaN	NaN	2	4
801	'>gi|387912532|ref|NP_001248760.1| serpin B7 isoform 2 [Homo sapiens]'	2	NaN	1	NaN	NaN	NaN	1	NaN	2	4
802	'>gi|42491362|ref|NP_963906.1| inhibitor of nuclear factor kappa-B kinase-interacting protein isoform 2 [Homo sapiens]'	NaN	NaN	NaN	NaN	2	2	NaN	NaN	2	4
803	'>gi|4502285|ref|NP_001672.1| sarcoplasmic/endoplasmic reticulum calcium ATPase 2 isoform a [Homo sapiens]'	NaN	NaN	NaN	2	2	NaN	NaN	NaN	2	4
804	'>gi|4506181|ref|NP_002778.1| proteasome subunit alpha type-2 [Homo sapiens]'	NaN	NaN	NaN	NaN	2	NaN	2	NaN	2	4
805	'>Reverse >gi|530377710|ref|XP_005263061.1| PREDICTED: ecto-ADP-ribosyltransferase 3 isoform X10 [Homo sapiens]'	NaN	NaN	NaN	1	NaN	NaN	NaN	2	2	3
806	'>gi|10863935|ref|NP_066959.1| reticulon-1 isoform A [Homo sapiens]'	NaN	NaN	NaN	NaN	NaN	NaN	1	2	2	3
807	'>gi|153252081|ref|NP_115961.2| ribonuclease 7 precursor [Homo sapiens]'	2	NaN	NaN	NaN	NaN	NaN	1	NaN	2	3
808	'>gi|21361144|ref|NP_002795.2| 26S protease regulatory subunit 6A [Homo sapiens]'	NaN	NaN	NaN	1	2	NaN	NaN	NaN	2	3
809	'>gi|258613953|ref|NP_001158226.1| aspartyl/asparaginyl beta-hydroxylase isoform j [Homo sapiens]'	NaN	NaN	NaN	NaN	2	NaN	1	NaN	2	3
810	'>gi|27894302|ref|NP_775297.1| interleukin-37 isoform 5 [Homo sapiens]'	1	NaN	NaN	NaN	NaN	NaN	2	NaN	2	3
811	'>gi|410991931|ref|NP_001258610.1| pyrroline-5-carboxylate reductase 2 isoform 2 [Homo sapiens]'	NaN	NaN	NaN	NaN	NaN	2	1	NaN	2	3
812	'>gi|4502163|ref|NP_001638.1| apolipoprotein D precursor [Homo sapiens]'	1	NaN	NaN	NaN	NaN	NaN	2	NaN	2	3
813	'>gi|4506447|ref|NP_002888.1| RNA-binding motif, single-stranded-interacting protein 1 isoform c [Homo sapiens]'	NaN	NaN	NaN	NaN	2	1	NaN	NaN	2	3
814	'>gi|4506695|ref|NP_001013.1| 40S ribosomal protein S19 [Homo sapiens]'	NaN	NaN	NaN	2	NaN	NaN	1	NaN	2	3
815	'>gi|5031571|ref|NP_005713.1| actin-related protein 2 isoform b [Homo sapiens]'	NaN	NaN	NaN	2	NaN	1	NaN	NaN	2	3
816	'>gi|526252794|ref|NP_001268230.1| kinesin-like protein KIF23 isoform 3 [Homo sapiens]'	NaN	NaN	1	NaN	NaN	NaN	NaN	2	2	3
817	'>gi|53729344|ref|NP_001005337.1| plakophilin-1 isoform 1a [Homo sapiens]'	NaN	NaN	NaN	NaN	1	2	NaN	NaN	2	3
818	'>gi|58530848|ref|NP_001011546.1| destrin isoform b [Homo sapiens]'	NaN	NaN	NaN	2	NaN	NaN	NaN	1	2	3
819	'>Reverse >gi|116235480|ref|NP_149118.2| protein transport protein Sec16B [Homo sapiens]'	2	NaN	NaN	NaN	NaN	NaN	NaN	NaN	2	2
820	'>Reverse >gi|118600977|ref|NP_056507.2| C3 and PZP-like alpha-2-macroglobulin domain-containing protein 8 [Homo sapiens]'	NaN	NaN	NaN	2	NaN	NaN	NaN	NaN	2	2
821	'>Reverse >gi|14249704|ref|NP_116307.1| ras-related and estrogen-regulated growth inhibitor isoform 1 [Homo sapiens]'	NaN	NaN	NaN	NaN	2	NaN	NaN	NaN	2	2
822	'>Reverse >gi|156119615|ref|NP_008832.2| unconventional myosin-IXa [Homo sapiens]'	2	NaN	NaN	NaN	NaN	NaN	NaN	NaN	2	2
823	'>Reverse >gi|19923667|ref|NP_542388.2| radical S-adenosyl methionine domain-containing protein 2 [Homo sapiens]'	NaN	2	NaN	NaN	NaN	NaN	NaN	NaN	2	2
824	'>Reverse >gi|20070264|ref|NP_056516.2| endoplasmic reticulum lectin 1 isoform 1 precursor [Homo sapiens]'	NaN	NaN	NaN	NaN	NaN	2	NaN	NaN	2	2
825	'>Reverse >gi|221218991|ref|NP_001137461.1| neuroblastoma breakpoint family member 4 [Homo sapiens]'	NaN	NaN	NaN	2	NaN	NaN	NaN	NaN	2	2
826	'>Reverse >gi|224493847|ref|NP_001139013.1| T-complex protein 11-like protein 1 [Homo sapiens]'	NaN	NaN	NaN	2	NaN	NaN	NaN	NaN	2	2
827	'>Reverse >gi|226371750|ref|NP_073741.2| speckle targeted PIP5K1A-regulated poly(A) polymerase [Homo sapiens]'	NaN	NaN	NaN	2	NaN	NaN	NaN	NaN	2	2
828	'>Reverse >gi|314122233|ref|NP_001186627.1| large proline-rich protein BAG6 isoform d [Homo sapiens]'	2	NaN	NaN	NaN	NaN	NaN	NaN	NaN	2	2
829	'>Reverse >gi|4502443|ref|NP_001714.1| dystonin isoform 1e precursor [Homo sapiens]'	NaN	NaN	2	NaN	NaN	NaN	NaN	NaN	2	2
830	'>Reverse >gi|4502901|ref|NP_001825.1| clathrin light chain B isoform a [Homo sapiens]'	NaN	NaN	NaN	NaN	NaN	2	NaN	NaN	2	2
831	'>Reverse >gi|4504811|ref|NP_002221.1| junction plakoglobin [Homo sapiens]'	NaN	NaN	NaN	NaN	2	NaN	NaN	NaN	2	2
832	'>Reverse >gi|55749544|ref|NP_055446.2| SH3 and PX domain-containing protein 2A [Homo sapiens]'	NaN	NaN	NaN	NaN	2	NaN	NaN	NaN	2	2
833	'>Reverse >gi|5730009|ref|NP_006501.1| zinc finger protein RFP [Homo sapiens]'	NaN	2	NaN	NaN	NaN	NaN	NaN	NaN	2	2
834	'>Reverse >gi|578800751|ref|XP_006711309.1| PREDICTED: SLIT-ROBO Rho GTPase-activating protein 2 isoform X7 [Homo sapiens]'	2	NaN	NaN	NaN	NaN	NaN	NaN	NaN	2	2
835	'>Reverse >gi|578822447|ref|XP_006718995.1| PREDICTED: centrosomal protein KIAA1731 isoform X7 [Homo sapiens]'	NaN	NaN	NaN	2	NaN	NaN	NaN	NaN	2	2
836	'>Reverse >gi|602617433|ref|NP_116271.3| paraneoplastic antigen-like protein 6A [Homo sapiens]'	NaN	NaN	2	NaN	NaN	NaN	NaN	NaN	2	2
837	'>Reverse >gi|62241003|ref|NP_705838.3| cardiomyopathy-associated protein 5 [Homo sapiens]'	NaN	NaN	NaN	NaN	2	NaN	NaN	NaN	2	2
838	'>gi|10835063|ref|NP_002511.1| nucleophosmin isoform 1 [Homo sapiens]'	NaN	NaN	NaN	2	NaN	NaN	NaN	NaN	2	2
839	'>gi|10835256|ref|NP_037390.2| apoptosis-associated speck-like protein containing a CARD isoform a [Homo sapiens]'	NaN	NaN	NaN	2	NaN	NaN	NaN	NaN	2	2
840	'>gi|110681719|ref|NP_114401.2| transmembrane protein 245 [Homo sapiens]'	NaN	NaN	NaN	NaN	2	NaN	NaN	NaN	2	2
841	'>gi|11321575|ref|NP_003686.1| lymphocyte antigen 6D precursor [Homo sapiens]'	NaN	NaN	NaN	2	NaN	NaN	NaN	NaN	2	2
842	'>gi|115334682|ref|NP_079524.2| SRC kinase signaling inhibitor 1 [Homo sapiens]'	NaN	NaN	2	NaN	NaN	NaN	NaN	NaN	2	2
843	'>gi|116517313|ref|NP_004861.2| mannose-P-dolichol utilization defect 1 protein [Homo sapiens]'	NaN	NaN	NaN	NaN	NaN	NaN	2	NaN	2	2
844	'>gi|117422433|ref|NP_001070968.1| kallikrein-10 preproprotein [Homo sapiens]'	2	NaN	NaN	NaN	NaN	NaN	NaN	NaN	2	2
845	'>gi|122939155|ref|NP_036475.3| NAD(P) transhydrogenase, mitochondrial [Homo sapiens]'	NaN	NaN	NaN	2	NaN	NaN	NaN	NaN	2	2
846	'>gi|124494254|ref|NP_006182.2| proliferation-associated protein 2G4 [Homo sapiens]'	NaN	NaN	NaN	2	NaN	NaN	NaN	NaN	2	2
847	'>gi|126012562|ref|NP_002323.2| prolow-density lipoprotein receptor-related protein 1 precursor [Homo sapiens]'	NaN	NaN	2	NaN	NaN	NaN	NaN	NaN	2	2
848	'>gi|13027648|ref|NP_073718.1| small nuclear ribonucleoprotein-associated protein N [Homo sapiens]'	NaN	NaN	NaN	NaN	NaN	NaN	2	NaN	2	2
849	'>gi|13489087|ref|NP_109591.1| leukocyte elastase inhibitor [Homo sapiens]'	NaN	NaN	NaN	NaN	NaN	2	NaN	NaN	2	2
850	'>gi|14043072|ref|NP_112533.1| heterogeneous nuclear ribonucleoproteins A2/B1 isoform B1 [Homo sapiens]'	NaN	NaN	NaN	2	NaN	NaN	NaN	NaN	2	2
851	'>gi|140972063|ref|NP_115984.3| neurabin-2 [Homo sapiens]'	NaN	NaN	NaN	2	NaN	NaN	NaN	NaN	2	2
852	'>gi|14110420|ref|NP_112738.1| heterogeneous nuclear ribonucleoprotein D0 isoform a [Homo sapiens]'	NaN	NaN	NaN	NaN	2	NaN	NaN	NaN	2	2
853	'>gi|14196462|ref|NP_114398.1| protocadherin gamma-A2 isoform 2 precursor [Homo sapiens]'	NaN	NaN	NaN	NaN	2	NaN	NaN	NaN	2	2
854	'>gi|142976675|ref|NP_055389.3| striatin-3 isoform 2 [Homo sapiens]'	NaN	NaN	NaN	2	NaN	NaN	NaN	NaN	2	2
855	'>gi|148298677|ref|NP_001091742.1| hydroxymethylglutaryl-CoA synthase, cytoplasmic [Homo sapiens]'	NaN	NaN	NaN	2	NaN	NaN	NaN	NaN	2	2
856	'>gi|15187164|ref|NP_150593.1| extracellular glycoprotein lacritin precursor [Homo sapiens]'	2	NaN	NaN	NaN	NaN	NaN	NaN	NaN	2	2
857	'>gi|153070260|ref|NP_002347.5| myristoylated alanine-rich C-kinase substrate [Homo sapiens]'	NaN	NaN	NaN	NaN	2	NaN	NaN	NaN	2	2
858	'>gi|155969697|ref|NP_775109.2| keratin, type II cytoskeletal 6C [Homo sapiens]'	NaN	NaN	NaN	NaN	NaN	NaN	NaN	2	2	2
859	'>gi|156415990|ref|NP_057066.2| Y-box-binding protein 2 [Homo sapiens]'	NaN	NaN	NaN	NaN	NaN	NaN	2	NaN	2	2
860	'>gi|156631005|ref|NP_002803.2| 26S proteasome non-ATPase regulatory subunit 8 [Homo sapiens]'	NaN	NaN	NaN	NaN	NaN	2	NaN	NaN	2	2
861	'>gi|157412270|ref|NP_112480.2| heterogeneous nuclear ribonucleoprotein M isoform b [Homo sapiens]'	NaN	NaN	NaN	2	NaN	NaN	NaN	NaN	2	2
862	'>gi|157739936|ref|NP_078964.2| uncharacterized protein C10orf68 isoform b [Homo sapiens]'	NaN	NaN	2	NaN	NaN	NaN	NaN	NaN	2	2
863	'>gi|16418397|ref|NP_443118.1| protein MAL2 [Homo sapiens]'	NaN	NaN	NaN	NaN	NaN	NaN	2	NaN	2	2
864	'>gi|16445419|ref|NP_005689.2| secretory carrier-associated membrane protein 3 isoform 1 [Homo sapiens]'	NaN	NaN	NaN	NaN	NaN	2	NaN	NaN	2	2
865	'>gi|171460922|ref|NP_597705.2| transmembrane protein 132D precursor [Homo sapiens]'	NaN	NaN	NaN	2	NaN	NaN	NaN	NaN	2	2
866	'>gi|189217863|ref|NP_612638.3| histidine triad nucleotide-binding protein 3 [Homo sapiens]'	NaN	NaN	NaN	NaN	NaN	NaN	2	NaN	2	2
867	'>gi|19923142|ref|NP_002256.2| importin subunit beta-1 isoform 1 [Homo sapiens]'	NaN	NaN	NaN	2	NaN	NaN	NaN	NaN	2	2
868	'>gi|20149560|ref|NP_004595.2| syntaxin-4 isoform 3 [Homo sapiens]'	NaN	NaN	NaN	NaN	NaN	2	NaN	NaN	2	2
869	'>gi|20336335|ref|NP_612815.1| bcl-2-like protein 1 isoform 1 [Homo sapiens]'	NaN	NaN	NaN	NaN	NaN	NaN	2	NaN	2	2
870	'>gi|20357556|ref|NP_612632.1| src substrate cortactin isoform b [Homo sapiens]'	NaN	NaN	NaN	2	NaN	NaN	NaN	NaN	2	2
871	'>gi|21361794|ref|NP_060918.2| cullin-associated NEDD8-dissociated protein 1 [Homo sapiens]'	NaN	NaN	2	NaN	NaN	NaN	NaN	NaN	2	2
872	'>gi|219803769|ref|NP_001137324.1| trichoplein keratin filament-binding protein [Homo sapiens]'	NaN	NaN	NaN	NaN	NaN	2	NaN	NaN	2	2
873	'>gi|22095331|ref|NP_055862.1| ER membrane protein complex subunit 1 isoform 1 precursor [Homo sapiens]'	NaN	NaN	NaN	2	NaN	NaN	NaN	NaN	2	2
874	'>gi|221307568|ref|NP_001138295.1| C-myc promoter-binding protein isoform 1 [Homo sapiens]'	2	NaN	NaN	NaN	NaN	NaN	NaN	NaN	2	2
875	'>gi|222144319|ref|NP_001138415.1| ras-related protein Rab-34 isoform 5 [Homo sapiens]'	NaN	NaN	NaN	NaN	NaN	NaN	2	NaN	2	2
876	'>gi|22218339|ref|NP_671722.1| protein FAM110B [Homo sapiens]'	NaN	NaN	NaN	2	NaN	NaN	NaN	NaN	2	2
877	'>gi|223468663|ref|NP_064695.3| aldo-keto reductase family 1 member B10 [Homo sapiens]'	NaN	NaN	NaN	NaN	NaN	NaN	NaN	2	2	2
878	'>gi|22749211|ref|NP_689801.1| transmembrane and TPR repeat-containing protein 2 precursor [Homo sapiens]'	2	NaN	NaN	NaN	NaN	NaN	NaN	NaN	2	2
879	'>gi|23238211|ref|NP_690601.1| actin-related protein 2/3 complex subunit 2 [Homo sapiens]'	NaN	NaN	NaN	NaN	NaN	2	NaN	NaN	2	2
880	'>gi|238624149|ref|NP_001154836.1| neuroplastin isoform d precursor [Homo sapiens]'	NaN	NaN	NaN	NaN	2	NaN	NaN	NaN	2	2
881	'>gi|24430155|ref|NP_694546.1| 26S protease regulatory subunit 6B isoform 2 [Homo sapiens]'	NaN	NaN	NaN	NaN	2	NaN	NaN	NaN	2	2
882	'>gi|253970504|ref|NP_001156758.1| RNA-binding protein EWS isoform 4 [Homo sapiens]'	NaN	NaN	NaN	2	NaN	NaN	NaN	NaN	2	2
883	'>gi|255918129|ref|NP_149977.2| lipase maturation factor 2 [Homo sapiens]'	NaN	NaN	NaN	NaN	2	NaN	NaN	NaN	2	2
884	'>gi|261399877|ref|NP_001159757.1| T-complex protein 1 subunit eta isoform d [Homo sapiens]'	NaN	NaN	NaN	NaN	2	NaN	NaN	NaN	2	2
885	'>gi|281182404|ref|NP_060830.2| gamma-taxilin isoform 1 [Homo sapiens]'	NaN	NaN	NaN	2	NaN	NaN	NaN	NaN	2	2
886	'>gi|28395033|ref|NP_786886.1| rho-related GTP-binding protein RhoC precursor [Homo sapiens]'	NaN	NaN	NaN	NaN	NaN	NaN	2	NaN	2	2
887	'>gi|285002231|ref|NP_001076581.2| glycerol-3-phosphate dehydrogenase, mitochondrial precursor [Homo sapiens]'	NaN	NaN	NaN	NaN	2	NaN	NaN	NaN	2	2
888	'>gi|297139728|ref|NP_001171922.1| RING finger protein 17 isoform 2 [Homo sapiens]'	NaN	NaN	2	NaN	NaN	NaN	NaN	NaN	2	2
889	'>gi|331284170|ref|NP_001193580.1| endophilin-B1 isoform 2 [Homo sapiens]'	NaN	NaN	NaN	NaN	NaN	2	NaN	NaN	2	2
890	'>gi|332801073|ref|NP_001193925.1| protein phosphatase 2, regulatory subunit B, gamma isoform d [Homo sapiens]'	NaN	NaN	NaN	NaN	2	NaN	NaN	NaN	2	2
891	'>gi|333033787|ref|NP_001106674.2| nascent polypeptide-associated complex subunit alpha isoform a [Homo sapiens]'	NaN	NaN	NaN	2	NaN	NaN	NaN	NaN	2	2
892	'>gi|343887344|ref|NP_001230574.1| cofilin-2 isoform 2 [Homo sapiens]'	NaN	NaN	NaN	NaN	NaN	2	NaN	NaN	2	2
893	'>gi|34740329|ref|NP_919223.1| heterogeneous nuclear ribonucleoprotein A3 [Homo sapiens]'	NaN	NaN	NaN	NaN	NaN	2	NaN	NaN	2	2
894	'>gi|37594464|ref|NP_054861.2| ADP-sugar pyrophosphatase [Homo sapiens]'	NaN	NaN	NaN	2	NaN	NaN	NaN	NaN	2	2
895	'>gi|38176151|ref|NP_085153.1| protein lunapark [Homo sapiens]'	NaN	NaN	NaN	NaN	2	NaN	NaN	NaN	2	2
896	'>gi|384475517|ref|NP_001244955.1| triosephosphate isomerase isoform 3 [Homo sapiens]'	NaN	NaN	NaN	NaN	2	NaN	NaN	NaN	2	2
897	'>gi|38683836|ref|NP_942088.1| leukocyte surface antigen CD47 isoform 2 precursor [Homo sapiens]'	NaN	NaN	NaN	NaN	2	NaN	NaN	NaN	2	2
898	'>gi|389565509|ref|NP_001254500.1| TBC1 domain family member 2A isoform 1 [Homo sapiens]'	NaN	NaN	NaN	2	NaN	NaN	NaN	NaN	2	2
899	'>gi|391353390|ref|NP_001254651.1| signal recognition particle subunit SRP72 isoform 2 [Homo sapiens]'	NaN	NaN	NaN	NaN	2	NaN	NaN	NaN	2	2
900	'>gi|39930371|ref|NP_059986.1| ras-related protein Rab-39A [Homo sapiens]'	NaN	NaN	NaN	2	NaN	NaN	NaN	NaN	2	2
901	'>gi|401461775|ref|NP_001257823.1| trafficking protein particle complex subunit 3 isoform 2 [Homo sapiens]'	NaN	NaN	NaN	NaN	NaN	NaN	2	NaN	2	2
902	'>gi|402691666|ref|NP_001257962.1| enhancer of filamentation 1 isoform 4 [Homo sapiens]'	NaN	NaN	NaN	NaN	2	NaN	NaN	NaN	2	2
903	'>gi|42716280|ref|NP_976221.1| vigilin isoform a [Homo sapiens]'	NaN	NaN	2	NaN	NaN	NaN	NaN	NaN	2	2
904	'>gi|42734503|ref|NP_976240.1| caprin-1 isoform 2 [Homo sapiens]'	NaN	NaN	NaN	2	NaN	NaN	NaN	NaN	2	2
905	'>gi|4501993|ref|NP_003650.1| alkyldihydroxyacetonephosphate synthase, peroxisomal precursor [Homo sapiens]'	NaN	NaN	NaN	NaN	2	NaN	NaN	NaN	2	2
906	'>gi|4502105|ref|NP_001144.1| annexin A4 [Homo sapiens]'	NaN	NaN	NaN	2	NaN	NaN	NaN	NaN	2	2
907	'>gi|4502211|ref|NP_001654.1| ADP-ribosylation factor 6 [Homo sapiens]'	NaN	NaN	NaN	NaN	NaN	NaN	2	NaN	2	2
908	'>gi|4502303|ref|NP_001688.1| ATP synthase subunit O, mitochondrial precursor [Homo sapiens]'	NaN	NaN	NaN	NaN	NaN	NaN	2	NaN	2	2
909	'>gi|4503131|ref|NP_001895.1| catenin beta-1 [Homo sapiens]'	NaN	NaN	NaN	2	NaN	NaN	NaN	NaN	2	2
910	'>gi|4504349|ref|NP_000509.1| hemoglobin subunit beta [Homo sapiens]'	NaN	NaN	NaN	2	NaN	NaN	NaN	NaN	2	2
911	'>gi|4505467|ref|NP_002517.1| 5''-nucleotidase isoform 1 preproprotein [Homo sapiens]'	NaN	NaN	NaN	NaN	2	NaN	NaN	NaN	2	2
912	'>gi|4506381|ref|NP_002863.1| ras-related C3 botulinum toxin substrate 2 [Homo sapiens]'	NaN	NaN	NaN	NaN	NaN	NaN	NaN	2	2	2
913	'>gi|4506669|ref|NP_000994.1| 60S acidic ribosomal protein P1 isoform 1 [Homo sapiens]'	NaN	NaN	NaN	2	NaN	NaN	NaN	NaN	2	2
914	'>gi|45387945|ref|NP_065779.1| extended synaptotagmin-2 [Homo sapiens]'	NaN	NaN	NaN	2	NaN	NaN	NaN	NaN	2	2
915	'>gi|4557395|ref|NP_000058.1| carbonic anhydrase 2 isoform 1 [Homo sapiens]'	NaN	NaN	NaN	NaN	NaN	NaN	2	NaN	2	2
916	'>gi|4557541|ref|NP_000104.1| torsin-1A precursor [Homo sapiens]'	NaN	NaN	NaN	NaN	NaN	2	NaN	NaN	2	2
917	'>gi|45827734|ref|NP_005978.2| cornifin-A [Homo sapiens]'	NaN	NaN	NaN	NaN	2	NaN	NaN	NaN	2	2
918	'>gi|4757766|ref|NP_004299.1| rho GTPase-activating protein 1 [Homo sapiens]'	NaN	NaN	NaN	NaN	2	NaN	NaN	NaN	2	2
919	'>gi|4757834|ref|NP_004273.1| BAG family molecular chaperone regulator 2 [Homo sapiens]'	NaN	NaN	NaN	NaN	NaN	NaN	2	NaN	2	2
920	'>gi|4758138|ref|NP_004387.1| probable ATP-dependent RNA helicase DDX5 [Homo sapiens]'	NaN	NaN	NaN	NaN	2	NaN	NaN	NaN	2	2
921	'>gi|4758304|ref|NP_004902.1| protein disulfide-isomerase A4 precursor [Homo sapiens]'	NaN	NaN	NaN	2	NaN	NaN	NaN	NaN	2	2
922	'>gi|4758332|ref|NP_004449.1| long-chain-fatty-acid--CoA ligase 4 isoform 1 [Homo sapiens]'	NaN	NaN	NaN	NaN	2	NaN	NaN	NaN	2	2
923	'>gi|4758638|ref|NP_004896.1| peroxiredoxin-6 [Homo sapiens]'	NaN	NaN	NaN	NaN	NaN	NaN	NaN	2	2	2
924	'>gi|48255959|ref|NP_001001396.1| plasma membrane calcium-transporting ATPase 4 isoform 4a [Homo sapiens]'	NaN	NaN	NaN	2	NaN	NaN	NaN	NaN	2	2
925	'>gi|4826998|ref|NP_005057.1| splicing factor, proline- and glutamine-rich [Homo sapiens]'	NaN	NaN	NaN	2	NaN	NaN	NaN	NaN	2	2
926	'>gi|5032179|ref|NP_005753.1| transcription intermediary factor 1-beta [Homo sapiens]'	NaN	NaN	NaN	NaN	NaN	NaN	NaN	2	2	2
927	'>gi|50345991|ref|NP_001001975.1| ATP synthase subunit delta, mitochondrial precursor [Homo sapiens]'	NaN	NaN	NaN	2	NaN	NaN	NaN	NaN	2	2
928	'>gi|50659080|ref|NP_001076.2| alpha-1-antichymotrypsin precursor [Homo sapiens]'	NaN	NaN	NaN	NaN	2	NaN	NaN	NaN	2	2
929	'>gi|5174661|ref|NP_005969.1| protein S100-A2 [Homo sapiens]'	NaN	NaN	NaN	2	NaN	NaN	NaN	NaN	2	2
930	'>gi|51873067|ref|NP_001004128.1| sulfhydryl oxidase 1 isoform b precursor [Homo sapiens]'	NaN	NaN	NaN	2	NaN	NaN	NaN	NaN	2	2
931	'>gi|530378220|ref|XP_005263305.1| PREDICTED: alpha-protein kinase 1 isoform X4 [Homo sapiens]'	NaN	2	NaN	NaN	NaN	NaN	NaN	NaN	2	2
932	'>gi|530401928|ref|XP_005266229.1| PREDICTED: fibrosin-1-like protein isoform X2 [Homo sapiens]'	NaN	NaN	NaN	NaN	NaN	NaN	2	NaN	2	2
933	'>gi|530404319|ref|XP_005267977.1| PREDICTED: brain-enriched guanylate kinase-associated protein isoform X2 [Homo sapiens]'	NaN	NaN	2	NaN	NaN	NaN	NaN	NaN	2	2
934	'>gi|530404461|ref|XP_005268046.1| PREDICTED: protein sel-1 homolog 1 isoform X2 [Homo sapiens]'	NaN	NaN	NaN	2	NaN	NaN	NaN	NaN	2	2
935	'>gi|530406197|ref|XP_005254606.1| PREDICTED: beta-2-microglobulin isoform X1 [Homo sapiens]'	NaN	NaN	NaN	NaN	NaN	NaN	NaN	2	2	2
936	'>gi|530406418|ref|XP_005254710.1| PREDICTED: tropomyosin alpha-1 chain isoform X18 [Homo sapiens]'	2	NaN	NaN	NaN	NaN	NaN	NaN	NaN	2	2
937	'>gi|538920367|ref|NP_001269337.1| interleukin-1 receptor-like 1 isoform 3 [Homo sapiens]'	NaN	NaN	NaN	2	NaN	NaN	NaN	NaN	2	2
938	'>gi|540344518|ref|NP_001269374.1| EH domain-containing protein 1 isoform 2 [Homo sapiens]'	NaN	NaN	NaN	NaN	2	NaN	NaN	NaN	2	2
939	'>gi|544186102|ref|NP_001269606.1| peroxisome biogenesis factor 1 isoform 2 [Homo sapiens]'	2	NaN	NaN	NaN	NaN	NaN	NaN	NaN	2	2
940	'>gi|5454028|ref|NP_006261.1| ras-related protein R-Ras precursor [Homo sapiens]'	NaN	NaN	NaN	NaN	NaN	2	NaN	NaN	2	2
941	'>gi|557786221|ref|NP_001273578.1| serine/threonine-protein kinase 24 isoform c precursor [Homo sapiens]'	NaN	NaN	NaN	NaN	2	NaN	NaN	NaN	2	2
942	'>gi|56117840|ref|NP_000534.3| sphingomyelin phosphodiesterase isoform 1 precursor [Homo sapiens]'	NaN	NaN	NaN	NaN	2	NaN	NaN	NaN	2	2
943	'>gi|56549093|ref|NP_001008405.1| B-cell receptor-associated protein 29 isoform a [Homo sapiens]'	NaN	NaN	NaN	NaN	NaN	NaN	2	NaN	2	2
944	'>gi|56549129|ref|NP_940932.2| matrix-remodeling-associated protein 7 isoform 3 precursor [Homo sapiens]'	NaN	NaN	NaN	NaN	NaN	2	NaN	NaN	2	2
945	'>gi|573459759|ref|NP_001275951.1| protein FAM177A1 isoform 2 [Homo sapiens]'	NaN	NaN	NaN	NaN	NaN	2	NaN	NaN	2	2
946	'>gi|578805255|ref|XP_006712935.1| PREDICTED: GRIP and coiled-coil domain-containing protein 2 isoform X3 [Homo sapiens]'	NaN	NaN	NaN	NaN	NaN	NaN	NaN	2	2	2
947	'>gi|578816347|ref|XP_006716774.1| PREDICTED: serine/arginine repetitive matrix protein 3-like [Homo sapiens]'	NaN	NaN	NaN	NaN	2	NaN	NaN	NaN	2	2
948	'>gi|578830689|ref|XP_006721871.1| PREDICTED: protein TANC2 isoform X6 [Homo sapiens]'	2	NaN	NaN	NaN	NaN	NaN	NaN	NaN	2	2
949	'''>gi|578835109|ref|XP_006723528.1| PREDICTED: dual specificity tyrosine-phosphorylation-regulated kinase 1B isoform X6 [Homo sapi...'' <Preview truncated at 128 characters>'	NaN	NaN	NaN	NaN	2	NaN	NaN	NaN	2	2
950	'>gi|578843139|ref|XP_006726458.1| PREDICTED: ankyrin repeat domain-containing protein 36C isoform X14 [Homo sapiens]'	NaN	2	NaN	NaN	NaN	NaN	NaN	NaN	2	2
951	'>gi|578844916|ref|XP_006726581.1| PREDICTED: annexin A8-like [Homo sapiens]'	NaN	NaN	NaN	2	NaN	NaN	NaN	NaN	2	2
952	'>gi|6005824|ref|NP_009121.1| SEC23-interacting protein [Homo sapiens]'	NaN	NaN	2	NaN	NaN	NaN	NaN	NaN	2	2
953	'>gi|612407805|ref|NP_055490.4| rootletin [Homo sapiens]'	NaN	NaN	NaN	2	NaN	NaN	NaN	NaN	2	2
954	'>gi|62868213|ref|NP_001017408.1| Golgi-associated PDZ and coiled-coil motif-containing protein isoform b [Homo sapiens]'	NaN	NaN	NaN	NaN	2	NaN	NaN	NaN	2	2
955	'>gi|645912966|ref|NP_001280134.1| major vault protein isoform 3 [Homo sapiens]'	NaN	NaN	NaN	2	NaN	NaN	NaN	NaN	2	2
956	'>gi|665821144|ref|NP_001287923.1| tumor protein D53 isoform 6 [Homo sapiens]'	NaN	NaN	NaN	NaN	NaN	NaN	2	NaN	2	2
957	'''>gi|665821217|ref|NP_001287921.1| eukaryotic translation initiation factor 3 subunit K {ECO:0000255|HAMAP-Rule:MF_03010} isoform...'' <Preview truncated at 128 characters>'	NaN	NaN	NaN	NaN	NaN	NaN	2	NaN	2	2
958	'>gi|666637956|ref|NP_001287983.1| prenylcysteine oxidase-like isoform 2 [Homo sapiens]'	NaN	NaN	NaN	NaN	2	NaN	NaN	NaN	2	2
959	'>gi|667751615|ref|NP_001288131.1| rasGAP-activating-like protein 1 isoform 4 [Homo sapiens]'	NaN	NaN	NaN	2	NaN	NaN	NaN	NaN	2	2
960	'>gi|6678271|ref|NP_031401.1| TAR DNA-binding protein 43 [Homo sapiens]'	NaN	NaN	NaN	NaN	2	NaN	NaN	NaN	2	2
961	'>gi|68160937|ref|NP_005073.2| E3 ubiquitin/ISG15 ligase TRIM25 [Homo sapiens]'	NaN	NaN	NaN	NaN	2	NaN	NaN	NaN	2	2
962	'>gi|6912450|ref|NP_036420.1| translocating chain-associated membrane protein 2 [Homo sapiens]'	NaN	NaN	NaN	NaN	NaN	2	NaN	NaN	2	2
963	'>gi|6912582|ref|NP_036524.1| peflin [Homo sapiens]'	NaN	NaN	NaN	NaN	NaN	2	NaN	NaN	2	2
964	'>gi|70166634|ref|NP_001002020.1| tRNA pseudouridine synthase A, mitochondrial isoform 2 [Homo sapiens]'	NaN	NaN	NaN	2	NaN	NaN	NaN	NaN	2	2
965	'>gi|74271826|ref|NP_001028228.1| glutamine synthetase [Homo sapiens]'	NaN	NaN	NaN	2	NaN	NaN	NaN	NaN	2	2
966	'>gi|7705318|ref|NP_057399.1| PTB domain-containing engulfment adapter protein 1 isoform a [Homo sapiens]'	NaN	NaN	NaN	NaN	NaN	2	NaN	NaN	2	2
967	'>gi|7705819|ref|NP_057181.1| immediate early response 3-interacting protein 1 precursor [Homo sapiens]'	NaN	NaN	NaN	NaN	NaN	NaN	NaN	2	2	2
968	'>gi|81295407|ref|NP_001032248.1| acyl-coenzyme A thioesterase 9, mitochondrial isoform a precursor [Homo sapiens]'	NaN	NaN	NaN	NaN	2	NaN	NaN	NaN	2	2
969	'>gi|83376130|ref|NP_001032752.1| elongation factor 1-beta [Homo sapiens]'	NaN	NaN	NaN	2	NaN	NaN	NaN	NaN	2	2
970	'>gi|9256616|ref|NP_061761.1| protocadherin beta-4 precursor [Homo sapiens]'	2	NaN	NaN	NaN	NaN	NaN	NaN	NaN	2	2
971	'>gi|94981556|ref|NP_963925.2| protein-glutamine gamma-glutamyltransferase 5 isoform 1 [Homo sapiens]'	2	NaN	NaN	NaN	NaN	NaN	NaN	NaN	2	2
972	'>gi|9665248|ref|NP_000584.2| antigen peptide transporter 1 isoform 1 [Homo sapiens]'	NaN	NaN	NaN	NaN	2	NaN	NaN	NaN	2	2
973	'>Reverse >gi|544710995|ref|NP_001269831.1| zinc finger transcription factor Trps1 isoform 2 [Homo sapiens]'	1	1	NaN	NaN	NaN	NaN	1	1	1	4
974	'>gi|538917823|ref|NP_001269317.1| integrin beta-6 isoform d [Homo sapiens]'	NaN	1	1	1	NaN	NaN	NaN	NaN	1	3
975	'>Reverse >gi|20127499|ref|NP_006266.2| serine/arginine-rich splicing factor 6 [Homo sapiens]'	NaN	1	NaN	1	NaN	NaN	NaN	NaN	1	2
976	'>Reverse >gi|532691767|ref|NP_001269160.1| armadillo repeat-containing X-linked protein 2 [Homo sapiens]'	NaN	NaN	NaN	NaN	NaN	1	1	NaN	1	2
977	'>gi|156151366|ref|NP_054900.2| galectin-related protein [Homo sapiens]'	NaN	NaN	NaN	1	NaN	NaN	NaN	1	1	2
978	'>gi|166795268|ref|NP_057110.3| retinol dehydrogenase 11 isoform 1 precursor [Homo sapiens]'	NaN	NaN	NaN	NaN	NaN	1	1	NaN	1	2
979	'>gi|284795266|ref|NP_067026.3| signal recognition particle receptor subunit beta [Homo sapiens]'	NaN	NaN	NaN	NaN	NaN	1	1	NaN	1	2
980	'>gi|336391093|ref|NP_001229573.1| ras-related protein Rab-2A isoform b [Homo sapiens]'	NaN	NaN	NaN	1	NaN	1	NaN	NaN	1	2
981	'>gi|4504415|ref|NP_002118.1| HLA class I histocompatibility antigen, alpha chain G precursor [Homo sapiens]'	NaN	NaN	NaN	NaN	1	1	NaN	NaN	1	2
982	'>gi|4758256|ref|NP_004085.1| eukaryotic translation initiation factor 2 subunit 1 [Homo sapiens]'	NaN	NaN	NaN	1	NaN	1	NaN	NaN	1	2
983	'>gi|4758302|ref|NP_004441.1| enhancer of rudimentary homolog [Homo sapiens]'	NaN	NaN	NaN	1	NaN	NaN	NaN	1	1	2
984	'>gi|5174663|ref|NP_005971.1| protein S100-P [Homo sapiens]'	NaN	NaN	NaN	1	NaN	NaN	NaN	1	1	2
985	'>gi|5803133|ref|NP_006825.1| ras-related protein Rab-32 [Homo sapiens]'	NaN	1	NaN	NaN	NaN	NaN	NaN	1	1	2
986	'>gi|61676188|ref|NP_113584.3| E3 ubiquitin-protein ligase HUWE1 [Homo sapiens]'	1	1	NaN	NaN	NaN	NaN	NaN	NaN	1	2
987	'>sp|CASB_BOVIN|(Common contaminant protein)'	NaN	1	1	NaN	NaN	NaN	NaN	NaN	1	2
988	'>Reverse >gi|109134355|ref|NP_057206.2| centrosomal protein of 83 kDa [Homo sapiens]'	1	NaN	NaN	NaN	NaN	NaN	NaN	NaN	1	1
989	'>Reverse >gi|110556636|ref|NP_203754.2| 182 kDa tankyrase-1-binding protein [Homo sapiens]'	NaN	NaN	NaN	1	NaN	NaN	NaN	NaN	1	1
990	'>Reverse >gi|14210514|ref|NP_115896.1| piggyBac transposable element-derived protein 1 [Homo sapiens]'	NaN	1	NaN	NaN	NaN	NaN	NaN	NaN	1	1
991	'>Reverse >gi|170650643|ref|NP_056297.1| solute carrier family 22 member 23 isoform a [Homo sapiens]'	NaN	1	NaN	NaN	NaN	NaN	NaN	NaN	1	1
992	'>Reverse >gi|188595682|ref|NP_001120965.1| ankyrin-2 isoform 3 [Homo sapiens]'	NaN	NaN	NaN	1	NaN	NaN	NaN	NaN	1	1
993	'>Reverse >gi|194272228|ref|NP_001123564.1| leucine-rich repeat-containing protein 48 isoform b [Homo sapiens]'	NaN	NaN	NaN	NaN	NaN	1	NaN	NaN	1	1
994	'>Reverse >gi|20070125|ref|NP_000909.2| protein disulfide-isomerase precursor [Homo sapiens]'	NaN	NaN	1	NaN	NaN	NaN	NaN	NaN	1	1
995	'>Reverse >gi|205360925|ref|NP_001128564.1| mucin-15 isoform c [Homo sapiens]'	NaN	NaN	NaN	1	NaN	NaN	NaN	NaN	1	1
996	'>Reverse >gi|225637477|ref|NP_001139480.1| solute carrier organic anion transporter family member 5A1 isoform 2 [Homo sapiens]'	NaN	1	NaN	NaN	NaN	NaN	NaN	NaN	1	1
997	'>Reverse >gi|226342869|ref|NP_001139686.1| TBC1 domain family member 15 isoform 2 [Homo sapiens]'	1	NaN	NaN	NaN	NaN	NaN	NaN	NaN	1	1
998	'>Reverse >gi|238908499|ref|NP_659001.2| sciellin isoform 1 [Homo sapiens]'	NaN	1	NaN	NaN	NaN	NaN	NaN	NaN	1	1
999	'>Reverse >gi|254675185|ref|NP_853517.2| keratin, type I cytoskeletal 26 [Homo sapiens]'	1	NaN	NaN	NaN	NaN	NaN	NaN	NaN	1	1
1000	'>Reverse >gi|285026441|ref|NP_001165377.1| U8 snoRNA-decapping enzyme isoform 1 [Homo sapiens]'	NaN	NaN	NaN	NaN	NaN	NaN	1	NaN	1	1
1001	'>Reverse >gi|33300635|ref|NP_006773.2| zinc finger protein-like 1 [Homo sapiens]'	NaN	NaN	1	NaN	NaN	NaN	NaN	NaN	1	1
1002	'>Reverse >gi|39930371|ref|NP_059986.1| ras-related protein Rab-39A [Homo sapiens]'	NaN	NaN	NaN	1	NaN	NaN	NaN	NaN	1	1
1003	'>Reverse >gi|41152097|ref|NP_005079.2| A-kinase anchor protein 17A isoform 1 [Homo sapiens]'	NaN	NaN	NaN	NaN	NaN	1	NaN	NaN	1	1
1004	'>Reverse >gi|4504695|ref|NP_001555.1| inhibitor of growth protein 2 isoform 1 [Homo sapiens]'	NaN	NaN	NaN	1	NaN	NaN	NaN	NaN	1	1
1005	'>Reverse >gi|51093861|ref|NP_055365.2| caspase recruitment domain-containing protein 10 [Homo sapiens]'	NaN	NaN	NaN	NaN	NaN	NaN	NaN	1	1	1
1006	'>Reverse >gi|5174647|ref|NP_005966.1| protein-tyrosine kinase 6 isoform 1 [Homo sapiens]'	NaN	NaN	NaN	NaN	NaN	1	NaN	NaN	1	1
1007	'>Reverse >gi|530392124|ref|XP_005252492.1| PREDICTED: la-related protein 4B isoform X5 [Homo sapiens]'	1	NaN	NaN	NaN	NaN	NaN	NaN	NaN	1	1
1008	'>Reverse >gi|530406610|ref|XP_005254804.1| PREDICTED: probable E3 ubiquitin-protein ligase HERC1 isoform X6 [Homo sapiens]'	NaN	NaN	1	NaN	NaN	NaN	NaN	NaN	1	1
1009	'>Reverse >gi|530420023|ref|XP_005261632.1| PREDICTED: small G protein signaling modulator 3 isoform X4 [Homo sapiens]'	NaN	NaN	NaN	NaN	NaN	NaN	1	NaN	1	1
1010	'>Reverse >gi|530426079|ref|XP_005260947.1| PREDICTED: leucine zipper putative tumor suppressor 3 isoform X1 [Homo sapiens]'	NaN	1	NaN	NaN	NaN	NaN	NaN	NaN	1	1
1011	'>Reverse >gi|531034767|ref|NP_001269072.1| NLR family member X1 precursor [Homo sapiens]'	NaN	NaN	NaN	NaN	NaN	1	NaN	NaN	1	1
1012	'>Reverse >gi|533112502|ref|NP_955373.3| uncharacterized protein C19orf68 [Homo sapiens]'	NaN	NaN	NaN	NaN	NaN	NaN	NaN	1	1	1
1013	'>Reverse >gi|542133165|ref|NP_001269464.1| paraneoplastic antigen Ma3 isoform 2 [Homo sapiens]'	NaN	NaN	NaN	NaN	NaN	NaN	NaN	1	1	1
1014	'''>Reverse >gi|544709756|ref|NP_001269857.1| leucine-rich repeat transmembrane neuronal protein 4 isoform c precursor [Homo sapien...'' <Preview truncated at 128 characters>'	NaN	NaN	NaN	NaN	NaN	1	NaN	NaN	1	1
1015	'>Reverse >gi|56090582|ref|NP_001007562.1| immunity-related GTPase family Q protein [Homo sapiens]'	NaN	NaN	NaN	NaN	NaN	1	NaN	NaN	1	1
1016	'>Reverse >gi|578800544|ref|XP_006711227.1| PREDICTED: DC-STAMP domain-containing protein 2 isoform X1 [Homo sapiens]'	NaN	NaN	NaN	NaN	NaN	NaN	NaN	1	1	1
1017	'>Reverse >gi|76563940|ref|NP_005451.2| synphilin-1 isoform 1 [Homo sapiens]'	1	NaN	NaN	NaN	NaN	NaN	NaN	NaN	1	1
1018	'>Reverse >gi|8923900|ref|NP_061156.1| N-acylneuraminate cytidylyltransferase [Homo sapiens]'	NaN	NaN	1	NaN	NaN	NaN	NaN	NaN	1	1
1019	'>Reverse >gi|93204865|ref|NP_066015.2| ectopic P granules protein 5 homolog [Homo sapiens]'	NaN	NaN	NaN	NaN	1	NaN	NaN	NaN	1	1
1020	'>Reverse >gi|9966913|ref|NP_065178.1| actin-related protein 3B isoform 1 [Homo sapiens]'	NaN	NaN	NaN	NaN	1	NaN	NaN	NaN	1	1
1021	'>gi|10334859|ref|NP_066270.1| creatine kinase U-type, mitochondrial precursor [Homo sapiens]'	NaN	NaN	NaN	1	NaN	NaN	NaN	NaN	1	1
1022	'>gi|110238585|ref|NP_116037.2| protein FAM167B [Homo sapiens]'	NaN	NaN	NaN	1	NaN	NaN	NaN	NaN	1	1
1023	'>gi|11345462|ref|NP_068747.1| signal peptidase complex subunit 3 [Homo sapiens]'	NaN	NaN	NaN	NaN	NaN	NaN	1	NaN	1	1
1024	'>gi|114155142|ref|NP_003283.2| nucleoprotein TPR [Homo sapiens]'	NaN	1	NaN	NaN	NaN	NaN	NaN	NaN	1	1
1025	'>gi|116063568|ref|NP_060193.2| torsin-4A [Homo sapiens]'	NaN	NaN	NaN	1	NaN	NaN	NaN	NaN	1	1
1026	'>gi|11641237|ref|NP_071732.1| ras-related protein Rab-38 [Homo sapiens]'	NaN	NaN	NaN	NaN	NaN	1	NaN	NaN	1	1
1027	'>gi|117189975|ref|NP_112604.2| heterogeneous nuclear ribonucleoproteins C1/C2 isoform a [Homo sapiens]'	NaN	NaN	NaN	1	NaN	NaN	NaN	NaN	1	1
1028	'>gi|117306167|ref|NP_006240.4| basic salivary proline-rich protein 3 precursor [Homo sapiens]'	1	NaN	NaN	NaN	NaN	NaN	NaN	NaN	1	1
1029	'>gi|119392077|ref|NP_036426.3| rap guanine nucleotide exchange factor 5 [Homo sapiens]'	1	NaN	NaN	NaN	NaN	NaN	NaN	NaN	1	1
1030	'>gi|13027602|ref|NP_076424.1| DDRGK domain-containing protein 1 precursor [Homo sapiens]'	NaN	NaN	NaN	NaN	NaN	1	NaN	NaN	1	1
1031	'>gi|13124770|ref|NP_076869.1| vitamin K epoxide reductase complex subunit 1 isoform 1 precursor [Homo sapiens]'	NaN	NaN	NaN	NaN	NaN	NaN	NaN	1	1	1
1032	'>gi|131412228|ref|NP_002265.2| keratin, type I cytoskeletal 13 isoform b [Homo sapiens]'	1	NaN	NaN	NaN	NaN	NaN	NaN	NaN	1	1
1033	'>gi|13376181|ref|NP_079079.1| tubulin alpha chain-like 3 isoform 1 [Homo sapiens]'	NaN	NaN	NaN	NaN	1	NaN	NaN	NaN	1	1
1034	'>gi|13430848|ref|NP_068370.1| nuclear receptor subfamily 1 group D member 1 [Homo sapiens]'	NaN	NaN	NaN	1	NaN	NaN	NaN	NaN	1	1
1035	'>gi|14192943|ref|NP_115822.1| multiple epidermal growth factor-like domains protein 10 precursor [Homo sapiens]'	NaN	NaN	NaN	NaN	NaN	NaN	1	NaN	1	1
1036	'>gi|148233596|ref|NP_006717.2| lipopolysaccharide-responsive and beige-like anchor protein isoform 2 [Homo sapiens]'	NaN	1	NaN	NaN	NaN	NaN	NaN	NaN	1	1
1037	'>gi|15055539|ref|NP_002943.2| 40S ribosomal protein S2 [Homo sapiens]'	NaN	NaN	NaN	NaN	NaN	NaN	1	NaN	1	1
1038	'>gi|15088795|ref|NP_149975.1| GPI transamidase component PIG-S [Homo sapiens]'	NaN	NaN	NaN	NaN	1	NaN	NaN	NaN	1	1
1039	'>gi|156104862|ref|NP_859063.3| KN motif and ankyrin repeat domain-containing protein 4 [Homo sapiens]'	NaN	1	NaN	NaN	NaN	NaN	NaN	NaN	1	1
1040	'>gi|157168362|ref|NP_000261.2| purine nucleoside phosphorylase [Homo sapiens]'	NaN	NaN	NaN	NaN	1	NaN	NaN	NaN	1	1
1041	'>gi|166795297|ref|NP_057225.2| cytoplasmic dynein 1 light intermediate chain 1 [Homo sapiens]'	NaN	NaN	NaN	NaN	1	NaN	NaN	NaN	1	1
1042	'>gi|17738287|ref|NP_524558.1| secretory carrier-associated membrane protein 4 [Homo sapiens]'	NaN	NaN	NaN	NaN	NaN	NaN	1	NaN	1	1
1043	'>gi|18379366|ref|NP_005848.2| CAAX prenyl protease 1 homolog [Homo sapiens]'	NaN	NaN	NaN	NaN	NaN	1	NaN	NaN	1	1
1044	'>gi|188536094|ref|NP_001120926.1| non-syndromic hearing impairment protein 5 isoform b [Homo sapiens]'	NaN	NaN	NaN	NaN	1	NaN	NaN	NaN	1	1
1045	'>gi|188595687|ref|NP_001120959.1| filamin-C isoform b [Homo sapiens]'	NaN	1	NaN	NaN	NaN	NaN	NaN	NaN	1	1
1046	'>gi|195927017|ref|NP_001124320.1| membrane-associated phosphatidylinositol transfer protein 1 isoform b [Homo sapiens]'	NaN	NaN	1	NaN	NaN	NaN	NaN	NaN	1	1
1047	'>gi|19923985|ref|NP_612462.1| ras-related protein Rab-3C [Homo sapiens]'	NaN	NaN	NaN	NaN	NaN	1	NaN	NaN	1	1
1048	'>gi|205360840|ref|NP_001128582.1| dnaJ homolog subfamily A member 3, mitochondrial isoform 2 [Homo sapiens]'	NaN	NaN	NaN	NaN	1	NaN	NaN	NaN	1	1
1049	'>gi|208879470|ref|NP_001129122.1| eukaryotic translation elongation factor 1 epsilon-1 isoform 2 [Homo sapiens]'	NaN	NaN	NaN	NaN	NaN	NaN	1	NaN	1	1
1050	'>gi|21359888|ref|NP_005997.2| zinc finger and BTB domain-containing protein 16 [Homo sapiens]'	NaN	NaN	NaN	1	NaN	NaN	NaN	NaN	1	1
1051	'>gi|21361565|ref|NP_001679.2| ATP synthase F(0) complex subunit B1, mitochondrial precursor [Homo sapiens]'	NaN	NaN	NaN	NaN	NaN	NaN	1	NaN	1	1
1052	'>gi|214830451|ref|NP_001135771.1| sequestosome-1 isoform 2 [Homo sapiens]'	NaN	NaN	NaN	NaN	1	NaN	NaN	NaN	1	1
1053	'>gi|217330646|ref|NP_006704.3| activated RNA polymerase II transcriptional coactivator p15 [Homo sapiens]'	NaN	NaN	NaN	1	NaN	NaN	NaN	NaN	1	1
1054	'>gi|219689110|ref|NP_001137290.1| plasminogen activator inhibitor 2 [Homo sapiens]'	NaN	NaN	NaN	1	NaN	NaN	NaN	NaN	1	1
1055	'>gi|22035653|ref|NP_663612.1| apolipoprotein L2 [Homo sapiens]'	NaN	NaN	NaN	NaN	NaN	1	NaN	NaN	1	1
1056	'>gi|221218998|ref|NP_001137391.1| leukotriene B4 receptor 1 [Homo sapiens]'	1	NaN	NaN	NaN	NaN	NaN	NaN	NaN	1	1
1057	'>gi|221307571|ref|NP_001138296.1| zinc finger protein 234 [Homo sapiens]'	NaN	1	NaN	NaN	NaN	NaN	NaN	NaN	1	1
1058	'>gi|222418615|ref|NP_001138469.1| integrin alpha-7 isoform 3 [Homo sapiens]'	NaN	NaN	NaN	NaN	NaN	1	NaN	NaN	1	1
1059	'>gi|223555975|ref|NP_001138632.1| tropomyosin alpha-4 chain isoform Tpm4.1cy [Homo sapiens]'	NaN	NaN	NaN	1	NaN	NaN	NaN	NaN	1	1
1060	'>gi|224028248|ref|NP_001138882.1| non-POU domain-containing octamer-binding protein isoform 2 [Homo sapiens]'	NaN	NaN	NaN	NaN	1	NaN	NaN	NaN	1	1
1061	'>gi|22538435|ref|NP_680092.1| cathepsin B preproprotein [Homo sapiens]'	NaN	NaN	NaN	NaN	NaN	1	NaN	NaN	1	1
1062	'>gi|227498137|ref|NP_060829.2| ufm1-specific protease 2 [Homo sapiens]'	NaN	NaN	NaN	NaN	1	NaN	NaN	NaN	1	1
1063	'>gi|228008321|ref|NP_001004318.2| iron/zinc purple acid phosphatase-like protein precursor [Homo sapiens]'	NaN	NaN	NaN	NaN	1	NaN	NaN	NaN	1	1
1064	'>gi|23111034|ref|NP_003090.2| sorting nexin-1 isoform a [Homo sapiens]'	NaN	NaN	NaN	NaN	1	NaN	NaN	NaN	1	1
1065	'>gi|239937451|ref|NP_001155238.1| adenosylhomocysteinase isoform 2 [Homo sapiens]'	NaN	NaN	NaN	NaN	1	NaN	NaN	NaN	1	1
1066	'>gi|24307939|ref|NP_036205.1| T-complex protein 1 subunit epsilon [Homo sapiens]'	NaN	NaN	NaN	1	NaN	NaN	NaN	NaN	1	1
1067	'>gi|24307965|ref|NP_055422.1| UBX domain-containing protein 4 [Homo sapiens]'	NaN	NaN	NaN	NaN	1	NaN	NaN	NaN	1	1
1068	'>gi|24308097|ref|NP_056415.1| monoacylglycerol lipase ABHD12 isoform b [Homo sapiens]'	NaN	NaN	NaN	NaN	1	NaN	NaN	NaN	1	1
1069	'>gi|24797067|ref|NP_002107.3| HLA class I histocompatibility antigen, A-1 alpha chain precursor [Homo sapiens]'	NaN	NaN	NaN	NaN	NaN	1	NaN	NaN	1	1
1070	'>gi|260447062|ref|NP_001159507.1| suprabasin isoform 3 precursor [Homo sapiens]'	NaN	NaN	1	NaN	NaN	NaN	NaN	NaN	1	1
1071	'>gi|27363461|ref|NP_057153.8| mitochondrial import inner membrane translocase subunit TIM16 [Homo sapiens]'	NaN	NaN	NaN	1	NaN	NaN	NaN	NaN	1	1
1072	'>gi|288541299|ref|NP_612398.2| protein NOXP20 [Homo sapiens]'	NaN	NaN	NaN	NaN	1	NaN	NaN	NaN	1	1
1073	'>gi|28872725|ref|NP_002806.2| 26S proteasome non-ATPase regulatory subunit 11 [Homo sapiens]'	NaN	NaN	NaN	NaN	1	NaN	NaN	NaN	1	1
1074	'>gi|289063435|ref|NP_001165911.1| poly(U)-specific endoribonuclease isoform 3 precursor [Homo sapiens]'	NaN	NaN	NaN	1	NaN	NaN	NaN	NaN	1	1
1075	'>gi|294345475|ref|NP_001170859.1| galectin-3 isoform 2 [Homo sapiens]'	NaN	NaN	NaN	1	NaN	NaN	NaN	NaN	1	1
1076	'>gi|296080746|ref|NP_001171669.1| src substrate cortactin isoform c [Homo sapiens]'	NaN	NaN	NaN	NaN	1	NaN	NaN	NaN	1	1
1077	'>gi|296317239|ref|NP_001171724.1| peroxisomal membrane protein 11B isoform 2 [Homo sapiens]'	NaN	NaN	NaN	NaN	NaN	NaN	1	NaN	1	1
1078	'>gi|298566206|ref|NP_001119528.2| dermokine isoform 3 precursor [Homo sapiens]'	NaN	NaN	NaN	1	NaN	NaN	NaN	NaN	1	1
1079	'>gi|300388183|ref|NP_001177966.1| 26S proteasome non-ATPase regulatory subunit 1 isoform 2 [Homo sapiens]'	NaN	NaN	NaN	1	NaN	NaN	NaN	NaN	1	1
1080	'>gi|303519415|ref|NP_001182000.1| transmembrane protein 184B isoform a [Homo sapiens]'	NaN	NaN	NaN	1	NaN	NaN	NaN	NaN	1	1
1081	'>gi|30795231|ref|NP_006308.3| brain acid soluble protein 1 [Homo sapiens]'	NaN	NaN	NaN	NaN	1	NaN	NaN	NaN	1	1
1082	'>gi|31377806|ref|NP_002635.2| polymeric immunoglobulin receptor precursor [Homo sapiens]'	1	NaN	NaN	NaN	NaN	NaN	NaN	NaN	1	1
1083	'>gi|315360635|ref|NP_001186757.1| cornifin-A [Homo sapiens]'	NaN	NaN	NaN	NaN	1	NaN	NaN	NaN	1	1
1084	'>gi|31543831|ref|NP_001061.2| tubulin gamma-1 chain [Homo sapiens]'	NaN	NaN	NaN	NaN	1	NaN	NaN	NaN	1	1
1085	'>gi|324120908|ref|NP_065920.2| doublecortin domain-containing protein 5 [Homo sapiens]'	NaN	NaN	NaN	1	NaN	NaN	NaN	NaN	1	1
1086	'>gi|32483399|ref|NP_002568.2| serine/threonine-protein kinase PAK 2 [Homo sapiens]'	NaN	NaN	NaN	1	NaN	NaN	NaN	NaN	1	1
1087	'>gi|325053652|ref|NP_001191382.1| 26S protease regulatory subunit 7 isoform 2 [Homo sapiens]'	NaN	NaN	NaN	1	NaN	NaN	NaN	NaN	1	1
1088	'>gi|332164777|ref|NP_001193726.1| pyruvate kinase PKM isoform d [Homo sapiens]'	NaN	NaN	NaN	NaN	1	NaN	NaN	NaN	1	1
1089	'>gi|333609286|ref|NP_001193982.1| kallikrein-7 isoform 2 [Homo sapiens]'	NaN	NaN	NaN	NaN	NaN	1	NaN	NaN	1	1
1090	'>gi|338753391|ref|NP_001229712.1| tripartite motif-containing protein 26 [Homo sapiens]'	NaN	NaN	NaN	NaN	1	NaN	NaN	NaN	1	1
1091	'>gi|339409180|ref|NP_001229861.1| lymphocyte-specific protein 1 isoform 3 [Homo sapiens]'	NaN	NaN	1	NaN	NaN	NaN	NaN	NaN	1	1
1092	'>gi|348041379|ref|NP_001231695.1| MOB kinase activator 1B isoform 1 [Homo sapiens]'	NaN	NaN	NaN	NaN	NaN	NaN	1	NaN	1	1
1093	'>gi|365733566|ref|NP_001242953.1| rho GTPase-activating protein 22 isoform 1 [Homo sapiens]'	NaN	NaN	NaN	NaN	1	NaN	NaN	NaN	1	1
1094	'>gi|377823713|ref|NP_001243719.1| voltage-dependent L-type calcium channel subunit alpha-1F isoform 3 [Homo sapiens]'	NaN	1	NaN	NaN	NaN	NaN	NaN	NaN	1	1
1095	'>gi|379642611|ref|NP_001243838.1| cytochrome b reductase 1 isoform 3 [Homo sapiens]'	NaN	NaN	NaN	NaN	NaN	NaN	1	NaN	1	1
1096	'>gi|386781688|ref|NP_001247431.1| signal recognition particle subunit SRP68 isoform 2 [Homo sapiens]'	NaN	NaN	NaN	NaN	1	NaN	NaN	NaN	1	1
1097	'>gi|389886539|ref|NP_001254507.1| torsin-1A-interacting protein 1 isoform 1 [Homo sapiens]'	NaN	NaN	NaN	NaN	1	NaN	NaN	NaN	1	1
1098	'>gi|392841224|ref|NP_001255968.1| leucine-rich repeat protein SHOC-2 isoform 2 [Homo sapiens]'	1	NaN	NaN	NaN	NaN	NaN	NaN	NaN	1	1
1099	'>gi|410444379|ref|NP_001258537.1| LIM and SH3 domain protein 1 isoform b [Homo sapiens]'	NaN	NaN	NaN	NaN	NaN	1	NaN	NaN	1	1
1100	'>gi|422398896|ref|NP_001258717.1| cytoplasmic dynein 1 intermediate chain 2 isoform 3 [Homo sapiens]'	NaN	NaN	NaN	NaN	1	NaN	NaN	NaN	1	1
1101	'>gi|42558279|ref|NP_817124.1| tubulin beta-8 chain [Homo sapiens]'	NaN	NaN	NaN	NaN	1	NaN	NaN	NaN	1	1
1102	'>gi|42741675|ref|NP_976227.1| PDZ and LIM domain protein 7 isoform 2 [Homo sapiens]'	NaN	NaN	NaN	NaN	NaN	1	NaN	NaN	1	1
1103	'>gi|440918682|ref|NP_001258998.1| mycophenolic acid acyl-glucuronide esterase, mitochondrial isoform 2 [Homo sapiens]'	NaN	NaN	1	NaN	NaN	NaN	NaN	NaN	1	1
1104	'>gi|441478305|ref|NP_001259002.1| glutamine--tRNA ligase isoform b [Homo sapiens]'	NaN	NaN	NaN	1	NaN	NaN	NaN	NaN	1	1
1105	'>gi|4502205|ref|NP_001651.1| ADP-ribosylation factor 4 [Homo sapiens]'	NaN	NaN	NaN	NaN	NaN	NaN	1	NaN	1	1
1106	'>gi|4502861|ref|NP_001275.1| AP-3 complex subunit sigma-1 [Homo sapiens]'	NaN	NaN	NaN	NaN	NaN	NaN	1	NaN	1	1
1107	'>gi|4502981|ref|NP_001852.1| cytochrome c oxidase subunit 4 isoform 1, mitochondrial precursor [Homo sapiens]'	NaN	NaN	NaN	1	NaN	NaN	NaN	NaN	1	1
1108	'>gi|4503363|ref|NP_003850.1| dolichol-phosphate mannosyltransferase subunit 1 [Homo sapiens]'	NaN	NaN	NaN	NaN	NaN	NaN	1	NaN	1	1
1109	'>gi|4504041|ref|NP_002061.1| guanine nucleotide-binding protein G(i) subunit alpha-2 isoform 1 [Homo sapiens]'	NaN	NaN	NaN	NaN	NaN	1	NaN	NaN	1	1
1110	'>gi|4504771|ref|NP_002203.1| eukaryotic translation initiation factor 6 isoform a [Homo sapiens]'	NaN	NaN	NaN	NaN	NaN	1	NaN	NaN	1	1
1111	'>gi|4504789|ref|NP_002211.1| inositol-trisphosphate 3-kinase A [Homo sapiens]'	1	NaN	NaN	NaN	NaN	NaN	NaN	NaN	1	1
1112	'>gi|4505143|ref|NP_002386.1| NADP-dependent malic enzyme [Homo sapiens]'	NaN	NaN	NaN	1	NaN	NaN	NaN	NaN	1	1
1113	'>gi|4505169|ref|NP_002402.1| mammaglobin-A precursor [Homo sapiens]'	NaN	NaN	NaN	1	NaN	NaN	NaN	NaN	1	1
1114	'>gi|4506289|ref|NP_002818.1| tyrosine-protein phosphatase non-receptor type 1 isoform 1 [Homo sapiens]'	NaN	NaN	NaN	NaN	1	NaN	NaN	NaN	1	1
1115	'>gi|4506363|ref|NP_002861.1| ras-related protein Rab-13 isoform 1 [Homo sapiens]'	NaN	NaN	NaN	NaN	NaN	NaN	1	NaN	1	1
1116	'>gi|4506367|ref|NP_002857.1| ras-related protein Rab-3A [Homo sapiens]'	NaN	NaN	NaN	NaN	NaN	NaN	1	NaN	1	1
1117	'>gi|4506621|ref|NP_000978.1| 60S ribosomal protein L26 [Homo sapiens]'	NaN	NaN	NaN	1	NaN	NaN	NaN	NaN	1	1
1118	'>gi|4506697|ref|NP_001014.1| 40S ribosomal protein S20 isoform 2 [Homo sapiens]'	NaN	NaN	NaN	NaN	NaN	NaN	NaN	1	1	1
1119	'>gi|4506707|ref|NP_001019.1| 40S ribosomal protein S25 [Homo sapiens]'	NaN	NaN	NaN	NaN	NaN	NaN	NaN	1	1	1
1120	'>gi|4506901|ref|NP_003008.1| serine/arginine-rich splicing factor 3 [Homo sapiens]'	NaN	NaN	NaN	NaN	NaN	NaN	1	NaN	1	1
1121	'>gi|4507129|ref|NP_003085.1| small nuclear ribonucleoprotein E [Homo sapiens]'	NaN	NaN	NaN	NaN	1	NaN	NaN	NaN	1	1
1122	'>gi|4507793|ref|NP_003339.1| ubiquitin-conjugating enzyme E2 N [Homo sapiens]'	NaN	NaN	NaN	1	NaN	NaN	NaN	NaN	1	1
1123	'>gi|4507831|ref|NP_003556.1| serine/threonine-protein kinase ULK1 [Homo sapiens]'	NaN	NaN	NaN	NaN	1	NaN	NaN	NaN	1	1
1124	'>gi|47078281|ref|NP_055476.3| protein FAM53B [Homo sapiens]'	NaN	NaN	NaN	1	NaN	NaN	NaN	NaN	1	1
1125	'>gi|4759000|ref|NP_004274.1| ras-related protein Rab-3D [Homo sapiens]'	NaN	NaN	NaN	NaN	NaN	1	NaN	NaN	1	1
1126	'>gi|4759082|ref|NP_004648.1| serum deprivation-response protein [Homo sapiens]'	NaN	NaN	1	NaN	NaN	NaN	NaN	NaN	1	1
1127	'>gi|47717098|ref|NP_653184.2| V-type proton ATPase subunit C 2 isoform b [Homo sapiens]'	NaN	NaN	NaN	1	NaN	NaN	NaN	NaN	1	1
1128	'>gi|47933379|ref|NP_003818.2| alpha-soluble NSF attachment protein [Homo sapiens]'	NaN	NaN	NaN	NaN	NaN	1	NaN	NaN	1	1
1129	'>gi|4826686|ref|NP_004930.1| ATP-dependent RNA helicase DDX1 [Homo sapiens]'	NaN	NaN	NaN	1	NaN	NaN	NaN	NaN	1	1
1130	'>gi|4826878|ref|NP_005100.1| serine/threonine-protein kinase OSR1 [Homo sapiens]'	NaN	NaN	1	NaN	NaN	NaN	NaN	NaN	1	1
1131	'>gi|48314820|ref|NP_060040.1| 5-oxoprolinase [Homo sapiens]'	NaN	NaN	NaN	NaN	NaN	NaN	NaN	1	1	1
1132	'>gi|4885375|ref|NP_005310.1| histone H1.2 [Homo sapiens]'	NaN	NaN	NaN	NaN	NaN	NaN	1	NaN	1	1
1133	'>gi|5174445|ref|NP_006046.1| lanC-like protein 1 [Homo sapiens]'	NaN	NaN	NaN	NaN	NaN	1	NaN	NaN	1	1
1134	'>gi|5174539|ref|NP_005908.1| malate dehydrogenase, cytoplasmic isoform 2 [Homo sapiens]'	NaN	NaN	NaN	1	NaN	NaN	NaN	NaN	1	1
1135	'>gi|5174615|ref|NP_006058.1| ER membrane protein complex subunit 8 isoform 1 [Homo sapiens]'	NaN	NaN	NaN	NaN	NaN	NaN	1	NaN	1	1
1136	'>gi|52426745|ref|NP_005179.2| E3 ubiquitin-protein ligase CBL [Homo sapiens]'	NaN	1	NaN	NaN	NaN	NaN	NaN	NaN	1	1
1137	'>gi|528524524|ref|NP_001268669.1| FH1/FH2 domain-containing protein 3 isoform 3 [Homo sapiens]'	1	NaN	NaN	NaN	NaN	NaN	NaN	NaN	1	1
1138	'>gi|530368185|ref|XP_005264656.1| PREDICTED: protein YIPF4 isoform X1 [Homo sapiens]'	NaN	NaN	NaN	NaN	NaN	NaN	1	NaN	1	1
1139	'>gi|530384412|ref|XP_005249639.1| PREDICTED: synaptobrevin homolog YKT6 isoform X1 [Homo sapiens]'	NaN	NaN	NaN	NaN	NaN	NaN	1	NaN	1	1
1140	'>gi|530387123|ref|XP_005250110.1| PREDICTED: zyxin isoform X2 [Homo sapiens]'	NaN	NaN	NaN	NaN	1	NaN	NaN	NaN	1	1
1141	'>gi|530397289|ref|XP_005274302.1| PREDICTED: neuroblast differentiation-associated protein AHNAK isoform X6 [Homo sapiens]'	NaN	NaN	NaN	1	NaN	NaN	NaN	NaN	1	1
1142	'>gi|530397291|ref|XP_005274303.1| PREDICTED: neuroblast differentiation-associated protein AHNAK isoform X7 [Homo sapiens]'	NaN	NaN	1	NaN	NaN	NaN	NaN	NaN	1	1
1143	'>gi|530413015|ref|XP_005257805.1| PREDICTED: contactin-associated protein 1 isoform X1 [Homo sapiens]'	NaN	NaN	1	NaN	NaN	NaN	NaN	NaN	1	1
1144	'>gi|530413105|ref|XP_005257849.1| PREDICTED: synaptogyrin-2 isoform X1 [Homo sapiens]'	NaN	NaN	NaN	NaN	NaN	1	NaN	NaN	1	1
1145	'>gi|530428926|ref|XP_005275295.1| PREDICTED: HLA class I histocompatibility antigen, B-15 alpha chain isoform X1 [Homo sapiens]'	NaN	NaN	NaN	NaN	NaN	1	NaN	NaN	1	1
1146	'>gi|5453990|ref|NP_006254.1| proteasome activator complex subunit 1 isoform 1 [Homo sapiens]'	NaN	NaN	NaN	NaN	NaN	1	NaN	NaN	1	1
1147	'>gi|546231978|ref|NP_001271190.1| WD repeat-containing protein 86 isoform 3 [Homo sapiens]'	NaN	NaN	NaN	1	NaN	NaN	NaN	NaN	1	1
1148	'>gi|548923860|ref|NP_001271337.1| transmembrane protein 40 isoform d [Homo sapiens]'	NaN	NaN	NaN	1	NaN	NaN	NaN	NaN	1	1
1149	'>gi|557440906|ref|NP_001273515.1| CDP-diacylglycerol--inositol 3-phosphatidyltransferase isoform 3 [Homo sapiens]'	NaN	NaN	NaN	NaN	NaN	NaN	1	NaN	1	1
1150	'>gi|55770836|ref|NP_057086.2| saccharopine dehydrogenase-like oxidoreductase [Homo sapiens]'	NaN	NaN	NaN	NaN	1	NaN	NaN	NaN	1	1
1151	'>gi|5729909|ref|NP_006542.1| secretoglobin family 1D member 2 precursor [Homo sapiens]'	NaN	1	NaN	NaN	NaN	NaN	NaN	NaN	1	1
1152	'>gi|5729953|ref|NP_006591.1| nuclear migration protein nudC [Homo sapiens]'	NaN	NaN	NaN	NaN	1	NaN	NaN	NaN	1	1
1153	'>gi|574278942|ref|NP_001276022.1| histidine--tRNA ligase, cytoplasmic isoform 6 [Homo sapiens]'	NaN	NaN	NaN	1	NaN	NaN	NaN	NaN	1	1
1154	'>gi|574584811|ref|NP_001276056.1| tubulin beta-4A chain isoform 2 [Homo sapiens]'	NaN	NaN	NaN	NaN	1	NaN	NaN	NaN	1	1
1155	'>gi|578800858|ref|XP_006711350.1| PREDICTED: protein S100-A7A isoform X1 [Homo sapiens]'	NaN	NaN	NaN	NaN	NaN	NaN	1	NaN	1	1
1156	'>gi|578818374|ref|XP_006717495.1| PREDICTED: ankyrin repeat domain-containing protein 26 isoform X10 [Homo sapiens]'	NaN	NaN	1	NaN	NaN	NaN	NaN	NaN	1	1
1157	'>gi|578827470|ref|XP_006720776.1| PREDICTED: ADP-dependent glucokinase isoform X2 [Homo sapiens]'	NaN	NaN	NaN	NaN	1	NaN	NaN	NaN	1	1
1158	'>gi|6005717|ref|NP_009031.1| ATP synthase subunit e, mitochondrial [Homo sapiens]'	NaN	NaN	NaN	NaN	NaN	NaN	NaN	1	1	1
1159	'>gi|6005872|ref|NP_009145.1| translocation protein SEC63 homolog [Homo sapiens]'	NaN	NaN	NaN	NaN	1	NaN	NaN	NaN	1	1
1160	'>gi|62912476|ref|NP_004131.3| lethal(2) giant larvae protein homolog 1 [Homo sapiens]'	NaN	NaN	NaN	1	NaN	NaN	NaN	NaN	1	1
1161	'>gi|631226406|ref|NP_001278825.1| ras-related protein Rap-1A precursor [Homo sapiens]'	NaN	NaN	NaN	NaN	NaN	1	NaN	NaN	1	1
1162	'>gi|63252886|ref|NP_000908.2| prolyl 4-hydroxylase subunit alpha-1 isoform 1 precursor [Homo sapiens]'	NaN	NaN	NaN	NaN	1	NaN	NaN	NaN	1	1
1163	'>gi|656985045|ref|NP_001280627.1| septin-9 isoform f [Homo sapiens]'	NaN	NaN	NaN	1	NaN	NaN	NaN	NaN	1	1
1164	'>gi|663071018|ref|NP_001284578.1| CD81 antigen isoform 2 [Homo sapiens]'	NaN	NaN	NaN	NaN	NaN	NaN	NaN	1	1	1
1165	'>gi|663856781|ref|NP_001287727.1| septin-8 isoform e [Homo sapiens]'	NaN	NaN	NaN	1	NaN	NaN	NaN	NaN	1	1
1166	'>gi|66737372|ref|NP_001019383.1| protein S100-A13 [Homo sapiens]'	NaN	NaN	NaN	NaN	NaN	NaN	NaN	1	1	1
1167	'>gi|6912432|ref|NP_036407.1| interleukin-36 receptor antagonist protein [Homo sapiens]'	NaN	NaN	NaN	1	NaN	NaN	NaN	NaN	1	1
1168	'>gi|74315356|ref|NP_037408.2| sedoheptulokinase [Homo sapiens]'	1	NaN	NaN	NaN	NaN	NaN	NaN	NaN	1	1
1169	'>gi|7661910|ref|NP_055488.1| ER membrane protein complex subunit 2 [Homo sapiens]'	NaN	NaN	NaN	NaN	NaN	1	NaN	NaN	1	1
1170	'>gi|7662078|ref|NP_055454.1| tetratricopeptide repeat protein 37 [Homo sapiens]'	NaN	NaN	1	NaN	NaN	NaN	NaN	NaN	1	1
1171	'>gi|7705636|ref|NP_057156.1| vesicle transport protein GOT1B [Homo sapiens]'	NaN	NaN	NaN	NaN	NaN	NaN	NaN	1	1	1
1172	'>gi|83921614|ref|NP_085056.2| cytochrome b5 type B [Homo sapiens]'	NaN	NaN	NaN	NaN	NaN	NaN	1	NaN	1	1
1173	'>gi|88759348|ref|NP_078822.3| RING finger protein 219 [Homo sapiens]'	NaN	NaN	NaN	NaN	1	NaN	NaN	NaN	1	1
1174	'>gi|96975135|ref|NP_570137.2| ras-related protein Rab-24 [Homo sapiens]'	NaN	NaN	NaN	NaN	NaN	NaN	1	NaN	1	1
