# Supplementary material for: Myristoylated Neuronal Calcium Sensor-1 captures the preciliary vesicle at distal appendages
Source: eLife. 2025 Jan 30;14:e85998. doi: 10.7554/eLife.85998 (PMC11984960; doi:10.7554/eLife.85998)
Supplement: Figure 2—figure supplement 1—source data 1. [file elife-85998-fig2-figsupp1-data1.xlsx]

## Sheet: IF condition
Exp. number	Cell line	Ectopic expression	Fixation/culturing condition	anti-chiken Alexa488	anti-mouse IgG1 Alexa568	anti-mouse IgG2b Alexa647	Nuclear stain	Date	Replicate
KAN344-1	RPE-hTERT	pWPXLd/LAPN/puro/hNCS1-WT	Fixed in 4% PFA/serum starvation for 24 hours	chicken anti GFP, Invitrogen, 1:1000	CEP170, Invitrogen, 41-3200, 1:1000	Ac-Tub, 6B-11, SIGMA, 1:2000	DAPI
KAN344-2	RPE-hTERT	pWPXLd/LAPN/puro/hNCS1-G2A	Fixed in 4% PFA/serum starvation for 24 hours	chicken anti GFP, Invitrogen, 1:1000	CEP170, Invitrogen, 41-3200, 1:1000	Ac-Tub, 6B-11, SIGMA, 1:2000	DAPI
KAN344-3	RPE-hTERT	pWPXLd/LAPC/puro/hNCS1-WT	Fixed in 4% PFA/serum starvation for 24 hours	chicken anti GFP, Invitrogen, 1:1000	CEP170, Invitrogen, 41-3200, 1:1000	Ac-Tub, 6B-11, SIGMA, 1:2000	DAPI
KAN344-4	RPE-hTERT	pWPXLd/LAPC/puro/hNCS1-G2A	Fixed in 4% PFA/serum starvation for 24 hours	chicken anti GFP, Invitrogen, 1:1000	CEP170, Invitrogen, 41-3200, 1:1000	Ac-Tub, 6B-11, SIGMA, 1:2000	DAPI
