# Supplementary material for: Myristoylated Neuronal Calcium Sensor-1 captures the preciliary vesicle at distal appendages
Source: eLife. 2025 Jan 30;14:e85998. doi: 10.7554/eLife.85998 (PMC11984960; doi:10.7554/eLife.85998)
Supplement: Figure 2—figure supplement 2—source data 1. [file elife-85998-fig2-figsupp2-data1.xlsx]

## Sheet: Raw data
	Label	Area	Mean	Min	Max	X	Y	Circ	IntDen	RawIntDen	AR	Round	Solidity
1	CEP89_KAN417-1_1.tif:0001-0031	1.981	50.979	0	368	53.852	3.156	0.719	100.993	9635	1.981	0.505	0.867	0.980687
2	CEP89_KAN417-1_1.tif:0002-0125	1.782	69.441	0	654	135.381	12.837	0.87	123.738	11805	1.229	0.814	0.942	1.20156
3	CEP89_KAN417-1_1.tif:0003-0154	1.163	45.514	0	205	64.268	15.794	0.93	52.954	5052	1.029	0.972	0.969	0.514212
4	CEP89_KAN417-1_1.tif:0004-0397	1.415	55.289	0	367	24.051	40.589	0.884	78.237	7464	1.322	0.756	0.928	0.759714
5	CEP89_KAN417-1_1.tif:0005-0414	1.887	72.85	0	448	110.809	42.412	0.882	137.449	13113	1.389	0.72	0.921	1.33469
6	CEP89_KAN417-1_1.tif:0006-0498	1.342	60.336	0	434	67.282	50.999	0.958	80.951	7723	1.076	0.93	0.952	0.786076
7	CEP89_KAN417-1_1.tif:0007-0580	1.006	126.844	0	542	116.006	59.363	0.936	127.638	12177	1.044	0.957	0.985	1.23942
8	CEP89_KAN417-1_1.tif:0008-0584	1.583	57.98	0	433	39.189	59.775	0.819	91.769	8755	1.785	0.56	0.947	0.891117
9	CEP89_KAN417-1_1.tif:0009-0739	1.31	103.12	0	675	101.464	75.653	0.936	135.111	12890	1.062	0.942	0.943	1.31199
10	CEP89_KAN417-1_1.tif:0010-0741	1.195	34.719	0	239	131.897	75.862	0.943	41.487	3958	1.183	0.845	0.946	0.40286
11	CEP89_KAN417-1_1.tif:0011-0956	1.426	49.096	0	399	104.426	97.91	0.926	69.987	6677	1.122	0.892	0.948	0.67961
12	CEP89_KAN417-1_2.tif:0001-0057	1.415	264.489	0	1640	43.39	5.833	0.955	374.265	35706	1.016	0.985	0.975	3.63429
13	CEP89_KAN417-1_2.tif:0002-0097	1.457	44.691	0	296	69.724	9.938	0.887	65.113	6212	1.197	0.835	0.924	0.632281
14	CEP89_KAN417-1_2.tif:0003-0124	0.839	4.612	0	25	5.006	12.753	0.939	3.868	369	1.315	0.761	0.964	0.0375582
15	CEP89_KAN417-1_2.tif:0004-0133	1.562	60.235	0	639	127.913	13.627	0.828	94.075	8975	1.269	0.788	0.903	0.91351
16	CEP89_KAN417-1_2.tif:0005-0187	1.31	116.776	0	686	20.775	19.211	0.92	153.004	14597	1.282	0.78	0.98	1.48574
17	CEP89_KAN417-1_2.tif:0006-0320	1.761	32.369	0	280	102.714	32.708	0.824	57	5438	1.354	0.739	0.903	0.5535
18	CEP89_KAN417-1_2.tif:0007-0412	1.981	68.788	0	643	24.593	42.151	0.839	136.275	13001	1.734	0.577	0.929	1.32329
19	CEP89_KAN417-1_2.tif:0008-0416	1.101	13.267	0	84	83.081	42.623	0.907	14.601	1393	1.059	0.944	0.938	0.141785
20	CEP89_KAN417-1_2.tif:0009-0499	1.551	124.791	0	825	110.766	51.103	0.969	193.589	18469	1.239	0.807	0.955	1.87984
21	CEP89_KAN417-1_2.tif:0010-0520	1.059	15.248	0	96	65.271	53.234	0.972	16.142	1540	1.155	0.866	0.967	0.156747
22	CEP89_KAN417-1_2.tif:0011-0598	2.138	23.848	0	153	52.201	61.276	0.926	50.994	4865	1.133	0.883	0.944	0.495178
23	CEP89_KAN417-1_2.tif:0012-0672	2.233	72.967	0	469	130.608	68.799	0.757	162.909	15542	1.849	0.541	0.903	1.58192
24	CEP89_KAN417-1_2.tif:0013-0686	1.572	66.527	0	650	14.703	70.278	0.899	104.598	9979	1.298	0.77	0.943	1.0157
25	CEP89_KAN417-1_2.tif:0014-0726	0.985	115.426	0	516	133.505	74.38	0.692	113.728	10850	1.948	0.513	0.839	1.10435
26	CEP89_KAN417-1_2.tif:0015-0855	1.541	104.163	0	706	91.091	87.549	0.938	160.498	15312	1.186	0.843	0.945	1.55851
27	CEP89_KAN417-1_2.tif:0016-0933	1.205	87.191	0	797	114.905	95.58	0.924	105.102	10027	1.11	0.901	0.947	1.02059
28	CEP89_KAN417-1_3.tif:0001-0144	1.73	51.515	0	281	115.094	14.771	0.836	89.096	8500	1.534	0.652	0.919	0.865162
29	CEP89_KAN417-1_3.tif:0002-0282	1.31	69.12	0	558	39.227	28.91	0.851	90.563	8640	1.553	0.644	0.923	0.879412
30	CEP89_KAN417-1_3.tif:0003-0362	1.373	76.115	0	633	16.81	37.126	0.927	104.515	9971	1.197	0.836	0.967	1.01489
31	CEP89_KAN417-1_3.tif:0004-0524	1.761	67.44	0	509	92.568	53.631	0.794	118.759	11330	1.623	0.616	0.911	1.15321
32	CEP89_KAN417-1_3.tif:0005-0589	1.53	49.822	0	486	39.49	60.271	0.853	76.245	7274	1.532	0.653	0.924	0.740375
33	CEP89_KAN417-1_3.tif:0006-0775	1.006	69.708	0	409	61.438	79.337	0.936	70.145	6692	1.007	0.993	0.98	0.681137
34	CEP89_KAN417-1_3.tif:0007-0847	1.331	50.874	0	289	11.066	86.735	0.888	67.723	6461	1.321	0.757	0.93	0.657625
35	CEP89_KAN417-1_3.tif:0008-0878	0.912	20.989	0	124	111.631	89.945	0.907	19.14	1826	1.278	0.783	0.935	0.185857
36	CEP89_KAN417-1_4.tif:0001-0067	1.352	165.287	0	995	108.616	6.857	0.994	223.494	21322	1.016	0.984	0.959	2.17023
37	CEP89_KAN417-1_4.tif:0002-0140	2.159	51.102	0	502	89.309	14.323	0.759	110.343	10527	1.955	0.512	0.92	1.07148
38	CEP89_KAN417-1_4.tif:0003-0239	1.394	43.451	0	314	34.935	24.526	0.905	60.575	5779	1.164	0.859	0.943	0.588209
39	CEP89_KAN417-1_4.tif:0004-0264	2.054	63.628	0	693	105.744	27.019	0.791	130.719	12471	1.913	0.523	0.918	1.26935
40	CEP89_KAN417-1_4.tif:0005-0474	1.688	66.745	0	607	114.395	48.542	0.844	112.638	10746	1.402	0.713	0.928	1.09377
41	CEP89_KAN417-1_4.tif:0006-0485	1.342	31.812	0	256	14.849	49.716	0.921	42.682	4072	1.083	0.923	0.928	0.414464
42	CEP89_KAN417-1_4.tif:0007-0715	1.331	94.583	0	679	34.069	73.218	0.899	125.908	12012	1.048	0.955	0.948	1.22263
43	CEP89_KAN417-1_4.tif:0008-0730	1.656	38.481	0	346	58.056	74.691	0.708	63.73	6080	1.566	0.638	0.84	0.618845
44	CEP89_KAN417-1_4.tif:0009-0786	1.069	27.824	0	144	122.867	80.53	0.95	29.748	2838	1.33	0.752	0.976	0.288862
45	CEP89_KAN417-1_4.tif:0010-0816	1.73	55.164	0	326	121.152	83.541	0.817	95.406	9102	1.559	0.642	0.917	0.926436
46	CEP89_KAN417-1_4.tif:0011-0862	1.572	54.493	0	254	138.289	88.323	0.813	85.679	8174	1.435	0.697	0.929	0.831981
47	CEP89_KAN417-1_4.tif:0012-0920	1.635	76.609	0	518	82.416	94.286	0.867	125.269	11951	1.486	0.673	0.951	1.21642
48	CEP89_KAN417-1_5.tif:0001-0068	1.509	67.049	0	445	39.002	6.944	0.8	101.202	9655	1.799	0.556	0.938	0.982723
49	CEP89_KAN417-1_5.tif:0002-0156	1.488	75.915	0	550	94.032	15.997	0.781	112.994	10780	1.776	0.563	0.89	1.09723
50	CEP89_KAN417-1_5.tif:0003-0223	1.09	127.404	0	368	119.798	22.902	0.91	138.885	13250	1.073	0.932	0.972	1.34864
51	CEP89_KAN417-1_5.tif:0004-0292	1.52	111.49	0	772	31.78	29.955	0.915	169.45	16166	1.265	0.79	0.927	1.64544
52	CEP89_KAN417-1_5.tif:0005-0458	1.73	41.382	0	245	140.358	46.893	0.773	71.57	6828	1.673	0.598	0.892	0.69498
53	CEP89_KAN417-1_5.tif:0006-0546	1.551	82.905	0	589	7.687	55.934	0.843	128.612	12270	1.525	0.656	0.937	1.24889
54	CEP89_KAN417-1_5.tif:0007-0559	1.205	108.339	0	572	55.638	57.25	0.871	130.593	12459	1.291	0.774	0.954	1.26812
55	CEP89_KAN417-1_5.tif:0008-0588	1.08	139.146	0	324	125.021	60.27	0.901	150.226	14332	1.348	0.742	0.981	1.45877
56	CEP89_KAN417-1_5.tif:0009-0606	1.551	61.297	0	315	107.761	62.075	0.944	95.091	9072	1.084	0.923	0.955	0.923383
57	CEP89_KAN417-1_5.tif:0010-0839	1.132	141.13	0	846	60.102	85.904	0.905	159.764	15242	1.209	0.827	0.952	1.55139
58	CEP89_KAN417-1_5.tif:0011-0841	1.195	78.412	0	505	25.527	86.132	0.927	93.697	8939	1.046	0.956	0.974	0.909845
59	CEP89_KAN417-1_5.tif:0012-0846	1.887	109.061	0	832	124.02	86.639	0.891	205.769	19631	1.32	0.757	0.938	1.99812
60	CEP89_KAN417-1_5.tif:0013-0925	1.205	98.617	0	380	93.975	94.709	0.924	118.875	11341	1.137	0.879	0.943	1.15433
61	CEP89_KAN417-1_6.tif:0001-0085	1.646	43.739	0	367	51.653	8.657	0.823	71.979	6867	1.46	0.685	0.91	0.698949
62	CEP89_KAN417-1_6.tif:0002-0134	1.195	50.921	0	260	118.865	13.759	0.943	60.847	5805	1.27	0.787	0.95	0.590855
63	CEP89_KAN417-1_6.tif:0003-0584	1.457	58.827	0	432	121.991	59.785	0.921	85.71	8177	1.175	0.851	0.955	0.832286
64	CEP89_KAN417-1_6.tif:0004-0633	1.614	34.468	0	297	80.705	64.762	0.745	55.638	5308	1.515	0.66	0.873	0.540268
65	CEP89_KAN417-1_6.tif:0005-0791	1.143	67.321	0	352	14.693	81.05	0.942	76.916	7338	1.163	0.86	0.965	0.74689
66	CEP89_KAN417-1_6.tif:0006-0799	1.572	62.54	0	259	126.413	81.858	0.805	98.33	9381	1.787	0.56	0.906	0.954834
67	CEP89_KAN417-1_6.tif:0007-0930	1.101	77.381	0	424	58.847	95.311	0.819	85.165	8125	1.554	0.643	0.909	0.826993
										9824.75				1
68	CEP89_KAN417-2_1.tif:0001-0296	1.373	99.183	0	667	110.125	30.317	0.902	136.191	12993	1.072	0.933	0.956	1.32248
69	CEP89_KAN417-2_1.tif:0002-0299	0.901	125.663	0	617	113.275	30.611	0.94	113.277	10807	1.13	0.885	0.977	1.09998
70	CEP89_KAN417-2_1.tif:0003-0425	1.111	11.642	0	78	11.382	43.493	0.932	12.935	1234	1.333	0.75	0.938	0.125601
71	CEP89_KAN417-2_1.tif:0004-0470	1.017	11.392	0	105	57.364	48.077	0.933	11.582	1105	1.101	0.908	0.956	0.112471
72	CEP89_KAN417-2_1.tif:0005-0526	0.88	35.56	0	104	21.662	53.852	0.951	31.309	2987	1.163	0.86	0.971	0.304028
73	CEP89_KAN417-2_1.tif:0006-0593	1.237	25.153	0	227	102.205	60.793	0.859	31.11	2968	1.503	0.666	0.933	0.302094
74	CEP89_KAN417-2_1.tif:0007-0656	1.31	29.248	0	391	88.539	67.18	0.91	38.322	3656	1.27	0.787	0.954	0.372122
75	CEP89_KAN417-2_1.tif:0008-0840	1.258	13.258	0	149	2.99	85.953	0.952	16.677	1591	1.019	0.981	0.945	0.161938
76	CEP89_KAN417-2_1.tif:0009-0841	1.373	20.565	0	138	50.998	86.137	0.916	28.238	2694	1.308	0.765	0.942	0.274206
77	CEP89_KAN417-2_1.tif:0010-1009	1.184	13.159	0	93	56.409	103.316	0.935	15.587	1487	1.082	0.925	0.946	0.151353
78	CEP89_KAN417-2_2.tif:0001-0059	0.975	14.398	0	48	4.873	6.099	0.969	14.035	1339	1.223	0.818	0.974	0.136289
79	CEP89_KAN417-2_2.tif:0002-0106	1.195	16.746	0	82	84.155	10.916	0.916	20.01	1909	1.216	0.822	0.946	0.194305
80	CEP89_KAN417-2_2.tif:0003-0140	0.975	11.086	0	62	60.343	14.394	0.895	10.807	1031	1.136	0.88	0.921	0.104939
81	CEP89_KAN417-2_2.tif:0004-0229	1.405	13.075	0	61	128.38	23.531	0.964	18.364	1752	1.101	0.909	0.947	0.178325
82	CEP89_KAN417-2_2.tif:0005-0287	1.226	9.205	0	63	101.069	29.416	0.998	11.289	1077	1.111	0.9	0.959	0.109621
83	CEP89_KAN417-2_2.tif:0006-0388	0.975	14.925	0	71	57.689	39.778	0.924	14.549	1388	1.09	0.917	0.939	0.141276
84	CEP89_KAN417-2_2.tif:0007-0419	1.258	21.367	0	143	17.491	42.904	0.952	26.875	2564	1.069	0.936	0.93	0.260974
85	CEP89_KAN417-2_2.tif:0008-0523	1.059	23.238	0	126	94.453	53.558	0.912	24.601	2347	1.125	0.889	0.962	0.238887
86	CEP89_KAN417-2_2.tif:0009-0636	1.111	14.16	0	111	93.874	65.2	0.851	15.733	1501	1.111	0.9	0.91	0.152777
87	CEP89_KAN417-2_2.tif:0010-0745	1.174	18.643	0	133	41.764	76.337	0.927	21.886	2088	1.279	0.782	0.933	0.212525
88	CEP89_KAN417-2_2.tif:0011-0873	1.038	18.848	0	144	60.849	89.432	0.952	19.559	1866	1.115	0.897	0.966	0.189929
89	CEP89_KAN417-2_2.tif:0012-0990	1.268	15.942	0	86	52.628	101.424	0.87	20.22	1929	1.317	0.759	0.9	0.196341
90	CEP89_KAN417-2_2.tif:0013-1005	0.954	26.802	0	156	111.801	102.887	0.948	25.565	2439	1.106	0.904	0.958	0.248251
91	CEP89_KAN417-2_3.tif:0001-0110	1.52	9.531	0	85	104.99	11.334	0.86	14.486	1382	1.202	0.832	0.898	0.140665
92	CEP89_KAN417-2_3.tif:0002-0132	1.604	21.51	0	231	129.87	13.508	0.894	34.496	3291	1.374	0.728	0.939	0.33497
93	CEP89_KAN417-2_3.tif:0003-0227	1.048	16.91	0	126	10.604	23.232	0.962	17.725	1691	1.172	0.853	0.962	0.172116
94	CEP89_KAN417-2_3.tif:0004-0383	1.069	14.225	0	106	74.279	39.203	0.95	15.209	1451	1.176	0.85	0.971	0.147688
95	CEP89_KAN417-2_3.tif:0005-0575	1.289	16.87	0	105	112.634	58.944	0.885	21.75	2075	1.245	0.803	0.911	0.211201
96	CEP89_KAN417-2_3.tif:0006-0575	0.912	5.46	0	37	46.571	58.903	0.907	4.979	475	1.529	0.654	0.967	0.0483473
97	CEP89_KAN417-2_3.tif:0007-0737	1.384	11.114	0	112	45.815	75.47	0.791	15.377	1467	1.671	0.598	0.886	0.149317
98	CEP89_KAN417-2_3.tif:0008-0786	1.059	12.149	0	71	72.337	80.533	0.872	12.861	1227	1.553	0.644	0.935	0.124889
99	CEP89_KAN417-2_3.tif:0009-0811	1.163	3.982	0	29	119.243	82.983	0.947	4.633	442	1.299	0.77	0.953	0.0449884
100	CEP89_KAN417-2_3.tif:0010-0888	1.163	21.973	0	193	97.871	90.917	0.959	25.565	2439	1.213	0.825	0.969	0.248251
101	CEP89_KAN417-2_3.tif:0011-0966	1.048	15.5	0	85	88.661	98.914	0.981	16.247	1550	1.257	0.795	0.939	0.157765
102	CEP89_KAN417-2_4.tif:0001-0058	0.943	37.967	0	184	40.612	5.898	0.907	35.817	3417	1.163	0.86	0.963	0.347795
103	CEP89_KAN417-2_4.tif:0002-0085	0.996	12.968	0	54	77.155	8.761	0.926	12.914	1232	1.212	0.825	0.979	0.125398
104	CEP89_KAN417-2_4.tif:0003-0228	1.31	39.256	0	248	107.753	23.369	0.936	51.434	4907	1.165	0.858	0.954	0.499453
105	CEP89_KAN417-2_4.tif:0004-0319	1.132	22.722	0	116	46.668	32.643	0.842	25.722	2454	1.338	0.747	0.923	0.249777
106	CEP89_KAN417-2_4.tif:0005-0434	1.394	14.767	0	91	3.54	44.434	0.848	20.586	1964	1.487	0.673	0.917	0.199903
107	CEP89_KAN417-2_4.tif:0006-0506	1.226	21.034	0	139	74.973	51.851	0.912	25.796	2461	1.125	0.889	0.951	0.25049
108	CEP89_KAN417-2_4.tif:0007-0775	1.059	26.208	0	105	22.006	79.366	0.872	27.745	2647	1.358	0.736	0.931	0.269422
109	CEP89_KAN417-2_4.tif:0008-0845	1.331	38.866	0	148	133.009	86.529	0.951	51.738	4936	1.017	0.984	0.955	0.502405
110	CEP89_KAN417-2_4.tif:0009-0859	0.964	11.565	0	76	39.047	87.973	0.885	11.153	1064	1.383	0.723	0.934	0.108298
111	CEP89_KAN417-2_4.tif:0010-0872	1.593	18.428	0	131	65.586	89.245	0.985	29.36	2801	1.156	0.865	0.947	0.285096
112	CEP89_KAN417-2_4.tif:0011-0900	1.3	11.621	0	52	97.573	92.159	0.955	15.104	1441	1.07	0.934	0.943	0.14667
113	CEP89_KAN417-2_5.tif:0001-0076	1.363	15.038	0	105	75.367	7.801	0.946	20.492	1955	1.017	0.983	0.956	0.198987
114	CEP89_KAN417-2_5.tif:0002-0106	1.279	12.451	0	115	109.403	10.839	0.94	15.922	1519	1.087	0.92	0.946	0.15461
115	CEP89_KAN417-2_5.tif:0003-0147	1.457	238.921	0	1964	6.35	15.106	0.946	348.103	33210	1.1	0.909	0.955	3.38024
116	CEP89_KAN417-2_5.tif:0004-0213	1.289	11.642	0	54	43.799	21.876	0.976	15.01	1432	1.197	0.835	0.957	0.145754
117	CEP89_KAN417-2_5.tif:0005-0379	1.562	27.711	0	199	132.124	38.847	0.916	43.28	4129	1.213	0.824	0.949	0.420265
118	CEP89_KAN417-2_5.tif:0006-0446	1.321	6.063	0	35	29.404	45.692	0.917	8.008	764	1.324	0.755	0.962	0.0777628
119	CEP89_KAN417-2_5.tif:0007-0473	1.258	17.858	0	86	77.232	48.395	0.964	22.463	2143	1.114	0.898	0.968	0.218123
120	CEP89_KAN417-2_5.tif:0008-0608	1.247	8.95	0	50	54.941	62.274	0.928	11.163	1065	1.145	0.874	0.96	0.1084
121	CEP89_KAN417-2_5.tif:0009-0852	1.352	27.093	0	168	91.685	87.271	0.892	36.634	3495	1.355	0.738	0.918	0.355734
122	CEP89_KAN417-2_5.tif:0010-0989	1.331	21.126	0	88	30.116	101.348	0.94	28.123	2683	1.105	0.905	0.934	0.273086
123	CEP89_KAN417-2_5.tif:0011-1012	1.415	12.081	0	101	5.199	103.658	0.884	17.096	1631	1.428	0.7	0.925	0.166009
124	CEP89_KAN417-2_6.tif:0001-0042	1.184	167.31	0	1339	52.384	4.351	0.976	198.17	18906	1.001	0.999	0.974	1.92432
125	CEP89_KAN417-2_6.tif:0002-0078	0.985	6.117	0	23	2.615	8.053	0.947	6.027	575	1.205	0.83	0.974	0.0585257
126	CEP89_KAN417-2_6.tif:0003-0090	1.101	16.2	0	66	93.658	9.254	0.88	17.83	1701	1.115	0.897	0.938	0.173134
127	CEP89_KAN417-2_6.tif:0004-0227	1.122	114.112	0	451	123.598	23.32	0.924	127.983	12210	1.283	0.779	0.964	1.24278
128	CEP89_KAN417-2_6.tif:0005-0287	1.184	21.602	0	115	25.948	29.381	0.964	25.586	2441	1.32	0.757	0.946	0.248454
129	CEP89_KAN417-2_6.tif:0006-0296	1.195	17.342	0	88	101.608	30.293	0.889	20.723	1977	1.266	0.79	0.934	0.201227
130	CEP89_KAN417-2_6.tif:0007-0340	1.3	12.976	0	96	23.322	34.803	0.928	16.865	1609	1.264	0.791	0.95	0.16377
131	CEP89_KAN417-2_6.tif:0008-0349	0.922	10.784	0	37	60.634	35.823	0.917	9.947	949	1.255	0.797	0.957	0.0965928
132	CEP89_KAN417-2_6.tif:0009-0465	1.247	9.101	0	56	121.838	47.67	0.985	11.352	1083	1.139	0.878	0.96	0.110232
133	CEP89_KAN417-2_6.tif:0010-0467	1.237	11.932	0	132	5.44	47.811	0.883	14.758	1408	1.291	0.774	0.929	0.143312
134	CEP89_KAN417-2_6.tif:0011-0537	1.205	16.896	0	95	77.61	55.01	0.952	20.366	1943	1.092	0.916	0.95	0.197766
135	CEP89_KAN417-2_6.tif:0012-0697	1.038	11.343	0	60	53.382	71.355	0.984	11.771	1123	1.164	0.859	0.957	0.114303
136	CEP89_KAN417-2_6.tif:0013-0700	1.195	19.386	0	119	125.373	71.654	0.943	23.165	2210	1.142	0.876	0.942	0.224942
137	CEP89_KAN417-2_6.tif:0014-0827	1.426	10.199	0	62	24.239	84.701	0.926	14.538	1387	1.104	0.906	0.951	0.141174
138	CEP89_KAN417-2_6.tif:0015-0880	1.216	10.31	0	50	91.315	90.171	0.932	12.536	1196	1.127	0.887	0.951	0.121733
139	CEP89_KAN417-2_6.tif:0016-0942	1.656	25.487	0	222	114.208	96.442	0.9	42.21	4027	1.325	0.754	0.955	0.409883
										3060.24				0.311482
140	CEP89_KAN417-3_1.tif:0001-0149	1.415	92.785	0	468	86.351	15.314	0.919	131.296	12526	1.324	0.755	0.951	1.27494
141	CEP89_KAN417-3_1.tif:0002-0193	1.604	88.503	0	561	27.331	19.806	0.941	141.935	13541	1.119	0.893	0.936	1.37825
142	CEP89_KAN417-3_1.tif:0003-0312	0.985	91.011	0	424	8.492	31.932	0.876	89.672	8555	1.214	0.824	0.931	0.87076
143	CEP89_KAN417-3_1.tif:0004-0424	1.331	60.906	0	453	93.474	43.483	0.899	81.077	7735	1.198	0.835	0.962	0.787298
144	CEP89_KAN417-3_1.tif:0005-0619	0.86	60.293	0	163	70.491	63.399	0.928	51.822	4944	1.145	0.873	0.959	0.503219
145	CEP89_KAN417-3_1.tif:0006-0676	1.331	75.646	0	399	2.064	69.181	0.899	100.699	9607	1.413	0.708	0.966	0.977837
146	CEP89_KAN417-3_1.tif:0007-0716	1.457	72.396	0	457	105.947	73.312	0.946	105.479	10063	1.059	0.945	0.962	1.02425
147	CEP89_KAN417-3_1.tif:0008-0754	1.426	89.728	0	687	44.497	77.274	0.868	127.91	12203	1.326	0.754	0.925	1.24207
148	CEP89_KAN417-3_1.tif:0009-0909	1.939	63.784	0	536	136.885	93.087	0.811	123.686	11800	1.614	0.62	0.934	1.20105
149	CEP89_KAN417-3_1.tif:0010-0938	1.006	65.375	0	269	22.913	96.051	0.866	65.784	6276	1.445	0.692	0.946	0.638795
150	CEP89_KAN417-3_1.tif:0011-1033	1.101	120.924	0	534	103.81	105.845	0.854	133.088	12697	1.456	0.687	0.963	1.29235
151	CEP89_KAN417-3_2.tif:0001-0234	1.373	67.87	0	421	66.351	24.023	0.845	93.194	8891	1.505	0.665	0.932	0.90496
152	CEP89_KAN417-3_2.tif:0002-0330	1.761	54.643	0	592	96.596	33.809	0.832	96.223	9180	1.233	0.811	0.933	0.934375
153	CEP89_KAN417-3_2.tif:0003-0328	0.964	105.076	0	473	114.206	33.581	0.805	101.328	9667	1.847	0.541	0.939	0.983944
154	CEP89_KAN417-3_2.tif:0004-0580	1.824	62.391	0	609	105.795	59.344	0.853	113.791	10856	1.267	0.79	0.909	1.10496
155	CEP89_KAN417-3_2.tif:0005-0655	1.3	83.194	0	617	37.881	67.06	0.955	108.131	10316	1.414	0.707	0.954	1.05
156	CEP89_KAN417-3_2.tif:0006-0836	1.656	73.722	0	517	63.573	85.592	0.782	122.093	11648	1.703	0.587	0.9	1.18558
157	CEP89_KAN417-3_2.tif:0007-0861	1.373	65.427	0	362	104.424	88.132	0.836	89.84	8571	1.587	0.63	0.903	0.872389
158	CEP89_KAN417-3_2.tif:0008-0957	1.813	42.139	0	429	11.218	97.935	0.821	76.413	7290	1.486	0.673	0.885	0.742004
159	CEP89_KAN417-3_2.tif:0009-0983	1.918	73.251	0	707	89.766	100.565	0.838	140.509	13405	1.55	0.645	0.943	1.36441
160	CEP89_KAN417-3_3.tif:0001-0005	0.954	63.198	0	651	64.265	0.543	0.796	60.281	5751	1.997	0.501	0.963	0.585359
161	CEP89_KAN417-3_3.tif:0002-0097	0.975	185.452	0	851	3.074	9.907	0.937	180.781	17247	1.073	0.932	0.969	1.75547
162	CEP89_KAN417-3_3.tif:0003-0272	1.132	84.463	0	425	72.545	27.888	0.795	95.616	9122	1.664	0.601	0.923	0.928472
163	CEP89_KAN417-3_3.tif:0004-0349	1.279	65.279	0	259	45.113	35.739	0.913	83.478	7964	1.102	0.907	0.928	0.810606
164	CEP89_KAN417-3_3.tif:0005-0396	1.143	84.633	0	256	130.069	40.608	0.913	96.695	9225	1.461	0.685	0.965	0.938956
165	CEP89_KAN417-3_3.tif:0006-0410	0.839	94.175	0	311	17.283	41.992	0.906	78.97	7534	1.38	0.725	0.958	0.766839
166	CEP89_KAN417-3_3.tif:0007-0417	1.667	117.906	0	948	75.189	42.667	0.787	196.503	18747	1.644	0.608	0.893	1.90814
167	CEP89_KAN417-3_3.tif:0008-0652	1.824	102.517	0	868	117.748	66.797	0.882	186.975	17838	1.44	0.695	0.941	1.81562
168	CEP89_KAN417-3_3.tif:0009-0741	0.891	87.812	0	277	74.24	75.911	0.929	78.237	7464	1.126	0.888	0.971	0.759714
169	CEP89_KAN417-3_3.tif:0010-0760	1.08	61.777	0	212	96.746	77.839	0.878	66.696	6363	1.47	0.68	0.907	0.64765
170	CEP89_KAN417-3_3.tif:0011-0931	1.3	148.202	0	735	63.844	95.308	0.867	192.625	18377	1.504	0.665	0.922	1.87048
171	CEP89_KAN417-3_3.tif:0012-1031	1.237	102.415	0	548	75.515	105.549	0.976	126.673	12085	1.291	0.775	0.959	1.23006
172	CEP89_KAN417-3_4.tif:0001-0077	1.279	30.877	0	229	49.594	7.937	0.913	39.485	3767	1.217	0.822	0.935	0.38342
173	CEP89_KAN417-3_4.tif:0002-0088	1.122	96.533	0	411	68.692	8.999	0.953	108.267	10329	1.216	0.822	0.951	1.05132
174	CEP89_KAN417-3_4.tif:0003-0115	1.541	120.524	0	885	103.597	11.775	0.938	185.707	17717	1.235	0.81	0.955	1.8033
175	CEP89_KAN417-3_4.tif:0004-0264	1.604	91.608	0	698	124.627	27.048	0.941	146.914	14016	1.353	0.739	0.944	1.4266
176	CEP89_KAN417-3_4.tif:0005-0447	0.849	70.383	0	218	46.971	45.822	0.886	59.757	5701	1.455	0.687	0.959	0.580269
177	CEP89_KAN417-3_4.tif:0006-0487	1.027	27.888	0	134	140.609	49.87	0.974	28.647	2733	1.127	0.888	0.956	0.278175
178	CEP89_KAN417-3_4.tif:0007-0609	1.237	67.331	0	398	10.324	62.314	0.909	83.278	7945	1.068	0.936	0.922	0.808672
179	CEP89_KAN417-3_4.tif:0008-0640	1.373	80.985	0	630	53.932	65.561	0.942	111.202	10609	1.107	0.903	0.929	1.07982
180	CEP89_KAN417-3_4.tif:0009-0798	1.184	118.929	0	776	116.751	81.775	0.947	140.866	13439	1.116	0.896	0.978	1.36787
181	CEP89_KAN417-3_4.tif:0010-0859	1.101	55.438	0	290	81.529	87.967	0.935	61.015	5821	1.175	0.851	0.946	0.592483
182	CEP89_KAN417-3_5.tif:0001-0070	1.101	44.39	0	162	58	7.205	0.965	48.856	4661	1.079	0.927	0.946	0.474414
183	CEP89_KAN417-3_5.tif:0002-0107	1.08	13.738	0	124	92.132	10.936	0.89	14.832	1415	1.347	0.743	0.945	0.144024
184	CEP89_KAN417-3_5.tif:0003-0227	1.52	78.634	0	464	28.903	23.249	0.95	119.514	11402	1.253	0.798	0.957	1.16054
185	CEP89_KAN417-3_5.tif:0004-0236	1.845	117.812	0	845	114.617	24.183	0.901	217.341	20735	1.203	0.831	0.957	2.11049
186	CEP89_KAN417-3_5.tif:0005-0400	1.3	22.952	0	109	16.709	40.946	0.902	29.831	2846	1.487	0.672	0.954	0.289677
187	CEP89_KAN417-3_5.tif:0006-0513	1.446	114.217	0	767	94.646	52.529	0.965	165.215	15762	1.129	0.886	0.955	1.60432
188	CEP89_KAN417-3_5.tif:0007-0603	1.614	79.429	0	662	37.245	61.752	0.89	128.214	12232	1.435	0.697	0.922	1.24502
189	CEP89_KAN417-3_5.tif:0008-0616	1.31	132.112	0	981	117.116	63.094	0.91	173.097	16514	1.276	0.784	0.947	1.68086
190	CEP89_KAN417-3_5.tif:0009-0764	1.74	72.476	0	675	85.994	78.262	0.803	126.107	12031	1.375	0.727	0.892	1.22456
191	CEP89_KAN417-3_5.tif:0010-0811	1.478	49.943	0	400	79.269	83.063	0.899	73.813	7042	1.392	0.718	0.937	0.716762
192	CEP89_KAN417-3_5.tif:0011-0861	1.363	51.815	0	206	34.79	88.182	0.909	70.606	6736	1.364	0.733	0.935	0.685616
193	CEP89_KAN417-3_5.tif:0012-0877	1.331	88.102	0	635	120.019	89.786	0.899	117.282	11189	1.085	0.922	0.948	1.13886
194	CEP89_KAN417-3_5.tif:0013-0981	1.761	88.036	0	728	117.806	100.459	0.851	155.027	14790	1.557	0.642	0.926	1.50538
195	CEP89_KAN417-3_5.tif:0014-0994	1.405	51.448	0	266	54.441	101.874	0.888	72.262	6894	1.309	0.764	0.947	0.701698
196	CEP89_KAN417-3_5.tif:0015-1013	1.195	106.553	0	622	19.074	103.777	0.955	127.323	12147	1.012	0.988	0.974	1.23637
197	CEP89_KAN417-3_6.tif:0001-0078	1.436	97.628	0	559	84.921	8.013	0.958	140.195	13375	1.181	0.847	0.955	1.36136
198	CEP89_KAN417-3_6.tif:0002-0104	1.478	68.844	0	350	31.317	10.702	0.803	101.747	9707	1.579	0.633	0.904	0.988015
199	CEP89_KAN417-3_6.tif:0003-0218	1.761	53.19	0	415	35.39	22.287	0.86	93.666	8936	1.475	0.678	0.946	0.90954
200	CEP89_KAN417-3_6.tif:0004-0355	2.411	126.3	0	510	120.916	36.342	0.737	304.488	29049	1.581	0.633	0.883	2.95672
201	CEP89_KAN417-3_6.tif:0005-0357	1.74	112.855	0	899	18.831	36.577	0.904	196.367	18734	1.306	0.766	0.922	1.90682
202	CEP89_KAN417-3_6.tif:0006-0356	1.027	86.816	0	321	68.447	36.495	0.896	89.18	8508	1.224	0.817	0.995	0.865977
203	CEP89_KAN417-3_6.tif:0007-0598	1.562	48.06	0	388	9.883	61.168	0.8	75.061	7161	1.462	0.684	0.895	0.728874
204	CEP89_KAN417-3_6.tif:0008-0618	1.488	73.021	0	518	60.67	63.264	0.851	108.686	10369	1.368	0.731	0.896	1.0554
205	CEP89_KAN417-3_6.tif:0009-0771	1.394	76.09	0	485	88.892	78.981	0.905	106.076	10120	1.131	0.884	0.947	1.03005
206	CEP89_KAN417-3_6.tif:0010-0885	1.792	86.731	0	611	42.054	90.601	0.875	155.456	14831	1.402	0.713	0.95	1.50956
207	CEP89_KAN417-3_6.tif:0011-0937	0.912	49.69	0	189	133.132	95.935	0.919	45.313	4323	1.121	0.892	0.983	0.440011
										10604				1.07932
208	CEP89_KAN417-4_1.tif:0001-0021	1.184	68.292	0	423	63.606	2.187	0.947	80.889	7717	1.116	0.896	0.978	0.785466
209	CEP89_KAN417-4_1.tif:0002-0022	1.289	109.667	0	741	125.771	2.249	0.932	141.39	13489	1.296	0.772	0.976	1.37296
210	CEP89_KAN417-4_1.tif:0003-0089	0.891	53.482	0	161	27.535	9.159	0.962	47.651	4546	1.105	0.905	0.971	0.462709
211	CEP89_KAN417-4_1.tif:0004-0144	1.457	56.662	0	392	4.929	14.706	0.887	82.555	7876	1.225	0.816	0.93	0.801649
212	CEP89_KAN417-4_1.tif:0005-0177	0.933	30.135	0	159	69.686	18.135	0.959	28.112	2682	1.104	0.905	0.952	0.272984
213	CEP89_KAN417-4_1.tif:0006-0234	1.205	40.513	0	386	96.925	23.997	0.897	48.835	4659	1.324	0.755	0.95	0.474211
214	CEP89_KAN417-4_1.tif:0007-0239	1.53	82.233	0	575	134.162	24.524	0.907	125.845	12006	1.431	0.699	0.948	1.22202
215	CEP89_KAN417-4_1.tif:0008-0366	1.174	47.83	0	285	34.532	37.47	0.911	56.151	5357	1.2	0.833	0.974	0.545256
216	CEP89_KAN417-4_1.tif:0009-0380	1.184	54.451	0	352	62.575	38.915	0.871	64.495	6153	1.479	0.676	0.922	0.626276
217	CEP89_KAN417-4_1.tif:0010-0506	1.614	69.513	0	530	101.681	51.823	0.899	112.208	10705	1.384	0.722	0.945	1.0896
218	CEP89_KAN417-4_1.tif:0011-0551	1.289	79.78	0	620	125.946	56.434	0.948	102.858	9813	1.166	0.857	0.946	0.998804
219	CEP89_KAN417-4_1.tif:0012-0565	1.006	125.26	2	448	82.007	57.845	0.967	126.044	12025	1	1	0.98	1.22395
220	CEP89_KAN417-4_1.tif:0013-0623	1.394	43.06	0	232	31.751	63.825	0.957	60.03	5727	1.107	0.903	0.94	0.582916
221	CEP89_KAN417-4_1.tif:0014-0792	1.122	86.748	0	392	92.697	81.139	0.953	97.293	9282	1.251	0.8	0.96	0.944757
222	CEP89_KAN417-4_1.tif:0015-0838	1.96	107.658	0	893	120.205	85.864	0.856	211.021	20132	1.099	0.91	0.921	2.04911
223	CEP89_KAN417-4_1.tif:0016-1016	1.646	73.408	0	528	72.201	104.091	0.904	120.803	11525	1.099	0.91	0.966	1.17306
224	CEP89_KAN417-4_2.tif:0001-0129	1.08	38.621	0	240	16.257	13.256	0.89	41.697	3978	1.175	0.851	0.936	0.404896
225	CEP89_KAN417-4_2.tif:0002-0212	1.09	117.029	0	750	47.175	21.717	0.91	127.575	12171	1.101	0.908	0.977	1.23881
226	CEP89_KAN417-4_2.tif:0003-0246	1.059	54.752	0	279	94.459	25.262	0.9	57.965	5530	1.303	0.768	0.922	0.562864
227	CEP89_KAN417-4_2.tif:0004-0396	1.656	87.177	0	730	135.637	40.507	0.9	144.377	13774	1.256	0.796	0.958	1.40197
228	CEP89_KAN417-4_2.tif:0005-0411	0.912	21.448	0	103	55.031	42.132	0.907	19.559	1866	1.318	0.759	0.941	0.189929
229	CEP89_KAN417-4_2.tif:0006-0758	1.216	72.043	0	358	55.631	77.612	0.932	87.597	8357	1.216	0.823	0.951	0.850607
230	CEP89_KAN417-4_2.tif:0007-0870	1.405	62.687	0	388	103.646	89.183	0.833	88.048	8400	1.357	0.737	0.905	0.854984
231	CEP89_KAN417-4_2.tif:0008-0892	1.09	89.683	0	375	83.685	91.394	0.927	97.764	9327	1.052	0.95	0.933	0.949337
232	CEP89_KAN417-4_2.tif:0009-0999	1.373	89.763	0	323	23.104	102.291	0.969	123.256	11759	1.276	0.784	0.953	1.19688
233	CEP89_KAN417-4_3.tif:0001-0168	1.352	52.876	0	381	74.854	17.223	0.878	71.497	6821	1.368	0.731	0.931	0.694267
234	CEP89_KAN417-4_3.tif:0002-0179	1.216	93.552	0	591	33.317	18.314	0.932	113.749	10852	1.152	0.868	0.951	1.10456
235	CEP89_KAN417-4_3.tif:0003-0181	1.604	73.013	0	556	131.269	18.514	0.85	117.093	11171	1.351	0.74	0.93	1.13703
236	CEP89_KAN417-4_3.tif:0004-0270	2.442	182.056	0	1162	114.148	27.561	0.686	444.63	42419	2.39	0.418	0.947	4.31757
237	CEP89_KAN417-4_3.tif:0005-0413	1.247	71.916	0	588	45.929	42.265	0.902	89.704	8558	1.326	0.754	0.96	0.871066
238	CEP89_KAN417-4_3.tif:0006-0517	1.006	126.208	0	519	127.015	52.977	0.906	126.998	12116	1.216	0.823	0.985	1.23321
239	CEP89_KAN417-4_3.tif:0007-0528	1.132	66.472	0	354	74.589	54.066	0.842	75.249	7179	1.591	0.629	0.911	0.730706
240	CEP89_KAN417-4_3.tif:0008-0617	1.069	82.333	0	486	7.244	63.203	0.881	88.027	8398	1.418	0.705	0.932	0.85478
241	CEP89_KAN417-4_3.tif:0009-0638	1.289	78.691	0	604	116.303	65.354	0.91	101.454	9679	1.499	0.667	0.932	0.985165
242	CEP89_KAN417-4_3.tif:0010-0854	1.405	76.239	0	495	136.381	87.491	0.888	107.083	10216	1.43	0.699	0.944	1.03982
243	CEP89_KAN417-4_3.tif:0011-0862	0.985	115.085	0	533	38.691	88.27	0.947	113.393	10818	1.006	0.994	0.974	1.1011
244	CEP89_KAN417-4_4.tif:0001-0059	1.698	100.574	0	548	122.297	6.088	0.891	170.781	16293	1.432	0.698	0.945	1.65836
245	CEP89_KAN417-4_4.tif:0002-0084	1.205	92.548	0	636	67.305	8.645	0.857	111.558	10643	1.438	0.695	0.991	1.08328
246	CEP89_KAN417-4_4.tif:0003-0310	1.31	127.736	0	458	135.088	31.728	0.92	167.364	15967	1.304	0.767	0.984	1.62518
247	CEP89_KAN417-4_4.tif:0004-0344	1.363	109.915	0	633	85.598	35.191	0.848	149.775	14289	1.458	0.686	0.963	1.45439
248	CEP89_KAN417-4_4.tif:0005-0399	0.922	90.898	0	368	8.811	40.88	0.949	83.844	7999	1.061	0.942	0.951	0.814169
249	CEP89_KAN417-4_4.tif:0006-0441	1.184	69.858	0	531	44.638	45.109	0.908	82.744	7894	1.132	0.883	0.942	0.803481
250	CEP89_KAN417-4_4.tif:0007-0451	1.132	63.907	0	252	97.113	46.243	0.962	72.346	6902	1.062	0.941	0.956	0.702512
251	CEP89_KAN417-4_4.tif:0008-0590	1.205	57.843	0	323	8.569	60.469	0.924	69.725	6652	1.294	0.773	0.954	0.677066
252	CEP89_KAN417-4_4.tif:0009-0704	1.342	83.594	0	575	82.949	72.151	0.931	112.156	10700	1.212	0.825	0.955	1.08909
253	CEP89_KAN417-4_4.tif:0010-0716	1.268	76.628	0	574	20.043	73.322	0.866	97.188	9272	1.228	0.814	0.968	0.943739
254	CEP89_KAN417-4_4.tif:0011-0779	1.488	79.887	0	635	126.712	79.799	0.882	118.906	11344	1.556	0.643	0.944	1.15464
255	CEP89_KAN417-4_4.tif:0012-0910	1.279	71.508	0	328	96.901	93.153	0.898	91.444	8724	1.138	0.879	0.964	0.887962
256	CEP89_KAN417-4_4.tif:0013-0930	1.646	64.032	0	614	123.097	95.264	0.917	105.374	10053	1.451	0.689	0.96	1.02323
257	CEP89_KAN417-4_4.tif:0014-1007	1.247	64.622	0	395	18.993	103.085	0.928	80.605	7690	1.234	0.81	0.96	0.782717
258	CEP89_KAN417-4_5.tif:0001-0010	1.163	80.486	0	412	10.328	1.024	0.93	93.645	8934	1.265	0.79	0.969	0.909336
259	CEP89_KAN417-4_5.tif:0002-0020	1.478	73.766	0	348	59.142	2.089	0.811	109.022	10401	1.557	0.642	0.94	1.05865
260	CEP89_KAN417-4_5.tif:0003-0118	1.352	84.473	0	484	110.998	12.098	0.966	114.221	10897	1.109	0.901	0.959	1.10914
261	CEP89_KAN417-4_5.tif:0004-0308	1.478	54.348	0	389	86.175	31.593	0.876	80.322	7663	1.162	0.86	0.925	0.779969
262	CEP89_KAN417-4_5.tif:0005-0335	1.101	71.476	0	331	64.336	34.305	0.869	78.666	7505	1.238	0.808	0.897	0.763887
263	CEP89_KAN417-4_5.tif:0006-0342	1.415	85.215	0	415	119.058	35.047	0.944	120.583	11504	1.225	0.817	0.947	1.17092
264	CEP89_KAN417-4_5.tif:0007-0562	0.954	27.352	0	139	68.889	57.56	0.981	26.089	2489	1.063	0.941	0.958	0.25334
265	CEP89_KAN417-4_5.tif:0008-0647	1.394	89.286	0	675	38.868	66.309	0.871	124.472	11875	1.314	0.761	0.908	1.20868
266	CEP89_KAN417-4_5.tif:0009-0938	1.163	72.703	0	344	56.982	96.085	0.93	84.589	8070	1.161	0.861	0.965	0.821395
267	CEP89_KAN417-4_5.tif:0010-0995	0.901	53.105	0	298	118.711	101.869	0.974	47.871	4567	1.11	0.901	0.977	0.464847
268	CEP89_KAN417-4_6.tif:0001-0071	1.3	36.847	0	213	99.302	7.314	0.939	47.892	4569	1.123	0.89	0.973	0.46505
269	CEP89_KAN417-4_6.tif:0002-0152	1.593	99.816	0	750	43.548	15.642	0.857	159.031	15172	1.233	0.811	0.899	1.54426
270	CEP89_KAN417-4_6.tif:0003-0207	1.038	104.495	0	508	66.036	21.217	0.922	108.435	10345	1.362	0.734	0.966	1.05295
271	CEP89_KAN417-4_6.tif:0004-0229	1.541	142.041	0	1097	114.203	23.544	0.89	218.861	20880	1.404	0.712	0.955	2.12525
272	CEP89_KAN417-4_6.tif:0005-0321	1.551	86.392	0	740	111.556	32.893	0.887	134.021	12786	1.245	0.803	0.916	1.30141
273	CEP89_KAN417-4_6.tif:0006-0490	1.467	79.436	0	650	11.119	50.269	0.826	116.569	11121	1.475	0.678	0.936	1.13194
274	CEP89_KAN417-4_6.tif:0007-0543	1.373	125.534	0	936	72.817	55.569	0.877	172.374	16445	1.445	0.692	0.97	1.67383
275	CEP89_KAN417-4_6.tif:0008-0602	1.457	114.151	0	864	39.681	61.617	0.921	166.316	15867	1.18	0.847	0.955	1.615
276	CEP89_KAN417-4_6.tif:0009-0649	2.159	30.626	0	143	92.577	66.55	0.718	66.13	6309	1.705	0.587	0.862	0.642154
277	CEP89_KAN417-4_6.tif:0010-0686	1.656	129.937	0	1165	125.789	70.224	0.947	215.193	20530	1.193	0.839	0.958	2.08962
278	CEP89_KAN417-4_6.tif:0011-0853	1.237	53.576	0	362	12.447	87.309	0.859	66.266	6322	1.194	0.838	0.918	0.643477
279	CEP89_KAN417-4_6.tif:0012-0872	1.457	93.173	0	667	97.346	89.302	0.935	135.751	12951	1.115	0.897	0.933	1.3182
280	CEP89_KAN417-4_6.tif:0013-0948	1.31	160.408	0	1064	35.261	97.093	0.899	210.172	20051	1.371	0.729	0.916	2.04087
										10393.9				1.05794
281	CEP89_KAN417-5_1.tif:0001-0106	1.394	31.406	0	204	134.506	10.848	0.968	43.783	4177	1.022	0.979	0.967	0.425151
282	CEP89_KAN417-5_1.tif:0002-0132	0.922	19.239	0	87	23.692	13.505	0.899	17.746	1693	1.129	0.885	0.989	0.17232
283	CEP89_KAN417-5_1.tif:0003-0192	1.205	19.417	0	126	115.631	19.716	0.964	23.406	2233	1.039	0.963	0.979	0.227283
284	CEP89_KAN417-5_1.tif:0004-0305	1.069	6.206	0	39	31.077	31.311	0.968	6.635	633	1.053	0.95	0.944	0.0644291
285	CEP89_KAN417-5_1.tif:0005-0307	1.572	18.38	0	112	122.702	31.425	0.854	28.898	2757	1.552	0.645	0.949	0.280618
286	CEP89_KAN417-5_1.tif:0006-0331	1.017	10.567	0	56	83.115	33.95	0.964	10.744	1025	1.179	0.848	0.951	0.104328
287	CEP89_KAN417-5_1.tif:0007-0339	1.027	11.357	0	72	104.311	34.767	0.974	11.666	1113	1.168	0.856	0.961	0.113285
288	CEP89_KAN417-5_1.tif:0008-0379	1.205	19.565	0	128	45.957	38.866	1	23.584	2250	1.163	0.86	0.958	0.229014
289	CEP89_KAN417-5_1.tif:0009-0427	1.321	13.27	0	58	99.899	43.761	0.943	17.526	1672	1.189	0.841	0.955	0.170183
290	CEP89_KAN417-5_1.tif:0010-0469	1.405	305.627	0	3379	87.323	48.024	0.975	429.274	40954	1.034	0.967	0.975	4.16845
291	CEP89_KAN417-5_1.tif:0011-0567	1.122	21.561	0	80	121.713	58.032	0.896	24.182	2307	1.301	0.768	0.943	0.234815
292	CEP89_KAN417-5_1.tif:0012-0685	1.101	35.39	0	147	70.437	70.129	0.907	38.951	3716	1.251	0.799	0.938	0.378229
293	CEP89_KAN417-5_1.tif:0013-0712	1.216	15.871	0	86	19.214	72.923	0.932	19.297	1841	1.169	0.855	0.951	0.187384
294	CEP89_KAN417-5_1.tif:0014-0766	1.415	11.837	0	68	51.205	78.397	0.894	16.75	1598	1.173	0.853	0.938	0.162651
295	CEP89_KAN417-5_1.tif:0015-0796	1.394	33.278	0	341	127.203	81.538	0.941	46.393	4426	1.201	0.833	0.971	0.450495
296	CEP89_KAN417-5_1.tif:0016-0861	1.101	24.714	0	117	69.573	88.163	0.948	27.2	2595	1.113	0.899	0.977	0.264129
297	CEP89_KAN417-5_1.tif:0017-0897	1.268	15.793	0	97	101.597	91.871	0.932	20.031	1911	1.213	0.825	0.938	0.194509
298	CEP89_KAN417-5_2.tif:0001-0049	0.943	3.878	0	15	11.772	5.034	0.938	3.658	349	1.146	0.873	0.957	0.0355225
299	CEP89_KAN417-5_2.tif:0002-0129	1.446	28.348	0	312	109.093	13.247	0.929	41.005	3912	1.427	0.701	0.939	0.398178
300	CEP89_KAN417-5_2.tif:0003-0165	1.342	10.547	0	102	78.891	16.875	0.885	14.151	1350	1.449	0.69	0.911	0.137408
301	CEP89_KAN417-5_2.tif:0004-0248	0.954	39.088	0	155	14.907	25.426	0.917	37.284	3557	1.245	0.803	0.958	0.362045
302	CEP89_KAN417-5_2.tif:0005-0256	0.996	247.853	0	1696	131.713	26.261	0.957	246.806	23546	1.219	0.82	0.979	2.3966
303	CEP89_KAN417-5_2.tif:0006-0266	1.163	6.649	0	38	45.198	27.228	0.976	7.736	738	1.158	0.864	0.945	0.0751164
304	CEP89_KAN417-5_2.tif:0007-0365	0.86	32.195	0	170	124.444	37.362	0.897	27.672	2640	1.222	0.819	0.953	0.268709
305	CEP89_KAN417-5_2.tif:0008-0424	1.394	5.038	0	37	112.858	43.425	0.93	7.023	670	1.095	0.913	0.94	0.0681951
306	CEP89_KAN417-5_2.tif:0009-0602	1.96	11.684	0	101	133.648	61.616	0.896	22.903	2185	1.197	0.836	0.944	0.222398
307	CEP89_KAN417-5_2.tif:0010-0614	1.08	21.204	0	93	26.217	62.941	0.918	22.892	2184	1.02	0.981	0.949	0.222296
308	CEP89_KAN417-5_2.tif:0011-0655	1.174	13.902	0	78	50.223	67.061	0.985	16.32	1557	1.09	0.917	0.941	0.158477
309	CEP89_KAN417-5_2.tif:0012-0753	1.3	16.944	0	108	133.456	77.131	0.928	22.022	2101	1.192	0.839	0.936	0.213848
310	CEP89_KAN417-5_2.tif:0013-0792	0.985	5.394	0	35	6.863	81.149	0.892	5.314	507	1.082	0.924	0.895	0.0516044
311	CEP89_KAN417-5_2.tif:0014-0806	1.153	10.045	0	58	111.854	82.604	0.922	11.582	1105	1.055	0.948	0.961	0.112471
312	CEP89_KAN417-5_2.tif:0015-0812	1.226	23.12	0	152	77.736	83.203	0.928	28.353	2705	1.375	0.727	0.932	0.275325
313	CEP89_KAN417-5_2.tif:0016-0965	1.184	21.363	0	93	33.638	98.858	0.947	25.303	2414	1.076	0.93	0.97	0.245706
314	CEP89_KAN417-5_3.tif:0001-0203	1.415	12.881	0	102	30.877	20.821	0.908	18.228	1739	1.435	0.697	0.928	0.177002
315	CEP89_KAN417-5_3.tif:0002-0255	0.975	20.161	0	96	103.187	26.139	0.937	19.653	1875	1.062	0.942	0.969	0.190845
316	CEP89_KAN417-5_3.tif:0003-0306	1.08	8.243	0	40	11.019	31.412	0.947	8.899	849	1.03	0.971	0.941	0.0864144
317	CEP89_KAN417-5_3.tif:0004-0390	1.373	16.321	0	115	118.355	39.933	0.981	22.41	2138	1.016	0.985	0.967	0.217614
318	CEP89_KAN417-5_3.tif:0005-0577	1.111	19.387	0	167	130.04	59.141	0.899	21.54	2055	1.139	0.878	0.986	0.209166
319	CEP89_KAN417-5_3.tif:0006-0603	1.247	11.454	0	74	64.796	61.789	0.917	14.287	1363	1.209	0.827	0.933	0.138731
320	CEP89_KAN417-5_3.tif:0007-0702	1.006	6.76	0	50	7.818	71.865	0.894	6.803	649	1.253	0.798	0.946	0.0660577
321	CEP89_KAN417-5_3.tif:0008-0795	0.839	13.925	0	77	78.383	81.394	0.973	11.677	1114	1.168	0.856	0.952	0.113387
322	CEP89_KAN417-5_3.tif:0009-0833	1.289	8.439	0	48	41.576	85.265	0.976	10.88	1038	1.043	0.959	0.943	0.105652
323	CEP89_KAN417-5_3.tif:0010-0920	1.74	14.133	0	73	115.475	94.197	0.959	24.59	2346	1.187	0.843	0.946	0.238785
324	CEP89_KAN417-5_3.tif:0011-0997	1.457	21.741	0	293	60.046	102.171	0.911	31.676	3022	1.441	0.694	0.946	0.307591
325	CEP89_KAN417-5_4.tif:0001-0039	0.87	6.313	0	39	118.042	3.997	0.995	5.492	524	1.268	0.789	0.933	0.0533347
326	CEP89_KAN417-5_4.tif:0002-0115	1.342	18.133	0	165	126.394	11.842	0.931	24.328	2321	1.21	0.827	0.959	0.23624
327	CEP89_KAN417-5_4.tif:0003-0194	1.331	10.276	0	77	98.172	19.851	1	13.679	1305	1.022	0.979	0.958	0.132828
328	CEP89_KAN417-5_4.tif:0004-0251	1.048	8.28	0	50	73.936	25.762	0.903	8.679	828	1.241	0.806	0.966	0.084277
329	CEP89_KAN417-5_4.tif:0005-0271	0.964	8.38	0	43	115.846	27.756	0.945	8.082	771	1.33	0.752	0.934	0.0784753
330	CEP89_KAN417-5_4.tif:0006-0389	1.09	23.808	0	152	141.177	39.816	0.871	25.953	2476	1.39	0.719	0.937	0.252017
331	CEP89_KAN417-5_4.tif:0007-0393	1.216	14.362	0	174	52.489	40.229	0.96	17.463	1666	1.072	0.933	0.955	0.169572
332	CEP89_KAN417-5_4.tif:0008-0420	1.101	9.629	0	47	1.48	43.027	0.965	10.597	1011	1.072	0.932	0.95	0.102903
333	CEP89_KAN417-5_4.tif:0009-0458	1.258	27.183	0	121	91.045	46.939	0.909	34.192	3262	1.121	0.892	0.96	0.332019
334	CEP89_KAN417-5_4.tif:0010-0576	1.132	8.981	0	64	14.167	59.03	0.962	10.167	970	1.101	0.908	0.952	0.0987303
335	CEP89_KAN417-5_4.tif:0011-0634	0.912	9.08	0	46	80.428	64.952	1	8.281	790	1.282	0.78	0.956	0.0804092
336	CEP89_KAN417-5_4.tif:0012-0755	1.415	9.444	0	63	83.653	77.299	0.908	13.364	1275	1.255	0.797	0.928	0.129774
337	CEP89_KAN417-5_4.tif:0013-0804	1.583	18.55	0	102	46.677	82.302	0.851	29.36	2801	1.495	0.669	0.915	0.285096
338	CEP89_KAN417-5_4.tif:0014-0968	1.426	16.699	0	91	125.527	99.121	0.915	23.804	2271	1.285	0.778	0.928	0.231151
339	CEP89_KAN417-5_4.tif:0015-1033	0.975	16.688	0	76	59.11	105.82	0.895	16.268	1552	1.126	0.888	0.944	0.157968
340	CEP89_KAN417-5_5.tif:0001-0032	1.08	10.874	0	57	46.87	3.258	0.93	11.74	1120	1.138	0.879	0.981	0.113998
341	CEP89_KAN417-5_5.tif:0002-0051	1.373	72.511	0	579	141.328	5.289	0.953	99.567	9499	1.178	0.849	0.967	0.966844
342	CEP89_KAN417-5_5.tif:0003-0324	0.964	17	0	76	36.401	33.226	0.927	16.394	1564	1.301	0.769	0.974	0.15919
343	CEP89_KAN417-5_5.tif:0004-0347	1.006	17.708	0	199	100.333	35.591	0.954	17.819	1700	1.396	0.716	0.96	0.173032
344	CEP89_KAN417-5_5.tif:0005-0358	1.048	34.74	0	208	23.3	36.644	0.962	36.414	3474	1.342	0.745	0.966	0.353597
345	CEP89_KAN417-5_5.tif:0006-0431	1.237	19.678	0	95	79.355	44.177	0.976	24.339	2322	1.069	0.935	0.959	0.236342
346	CEP89_KAN417-5_5.tif:0007-0486	1.499	21.371	0	167	25.556	49.759	0.922	32.033	3056	1.096	0.913	0.963	0.311051
347	CEP89_KAN417-5_5.tif:0008-0504	1.289	13.837	0	82	123.835	51.605	0.959	17.84	1702	1.089	0.918	0.969	0.173236
348	CEP89_KAN417-5_5.tif:0009-0574	1.3	11.823	0	80	66.69	58.812	0.955	15.366	1466	1.204	0.83	0.95	0.149215
349	CEP89_KAN417-5_5.tif:0010-0638	1.488	6.5	0	42	43.317	65.31	0.956	9.675	923	1.292	0.774	0.95	0.0939464
350	CEP89_KAN417-5_5.tif:0011-0667	1.247	16.437	0	152	15.827	68.278	0.917	20.503	1956	1.075	0.93	0.941	0.199089
351	CEP89_KAN417-5_5.tif:0012-0731	1.163	9.279	0	45	73.249	74.894	0.93	10.796	1030	1.106	0.904	0.961	0.104837
352	CEP89_KAN417-5_5.tif:0013-0738	1.488	18.873	0	133	104.9	75.616	0.93	28.091	2680	1.138	0.879	0.94	0.272781
353	CEP89_KAN417-5_5.tif:0014-0772	1.059	118.673	0	361	97.089	79.058	0.941	125.636	11986	1.15	0.869	0.957	1.21998
354	CEP89_KAN417-5_5.tif:0015-0805	1.363	6.992	0	63	49.906	82.485	0.946	9.528	909	1.21	0.827	0.967	0.0925215
355	CEP89_KAN417-5_5.tif:0016-0890	1.3	11.903	0	63	136.554	91.098	0.955	15.471	1476	1.009	0.991	0.943	0.150233
356	CEP89_KAN417-5_5.tif:0017-0947	1.216	14.828	0	102	95.806	96.992	0.989	18.029	1720	1.118	0.895	0.955	0.175068
357	CEP89_KAN417-5_5.tif:0018-0991	1.289	13.496	0	109	21.767	101.498	0.91	17.4	1660	1.204	0.831	0.921	0.168961
358	CEP89_KAN417-5_6.tif:0001-0036	1.163	93.82	0	438	113.304	3.742	0.655	109.158	10414	2.2	0.454	0.822	1.05998
359	CEP89_KAN417-5_6.tif:0002-0083	1.174	2.545	0	15	32.596	8.524	0.927	2.987	285	1.132	0.884	0.941	0.0290084
360	CEP89_KAN417-5_6.tif:0003-0160	0.996	17.926	0	83	10.598	16.424	0.926	17.851	1703	1.233	0.811	0.979	0.173338
361	CEP89_KAN417-5_6.tif:0004-0197	1.195	28.281	0	129	100.208	20.154	0.972	33.794	3224	1.086	0.921	0.946	0.328151
362	CEP89_KAN417-5_6.tif:0005-0286	1.268	7.38	0	51	133.442	29.339	0.96	9.36	893	1.239	0.807	0.942	0.0908929
363	CEP89_KAN417-5_6.tif:0006-0478	1.048	15.37	0	64	56.975	48.946	0.903	16.111	1537	1.224	0.817	0.957	0.156442
364	CEP89_KAN417-5_6.tif:0007-0523	1.09	7.913	0	42	11.013	53.535	0.91	8.627	823	1.347	0.743	0.986	0.0837681
365	CEP89_KAN417-5_6.tif:0008-0522	0.849	154.654	0	1044	117.178	53.438	0.886	131.306	12527	1.487	0.673	0.959	1.27505
366	CEP89_KAN417-5_6.tif:0009-0638	0.87	11.12	0	62	130.91	65.375	0.865	9.675	923	1.487	0.672	0.922	0.0939464
367	CEP89_KAN417-5_6.tif:0010-0671	1.09	30.077	0	153	113.05	68.718	0.927	32.787	3128	1.313	0.761	0.95	0.31838
368	CEP89_KAN417-5_6.tif:0011-0682	1.132	9.157	0	45	88.855	69.823	0.962	10.367	989	1.184	0.845	0.96	0.100664
369	CEP89_KAN417-5_6.tif:0012-0800	1.446	14.768	0	114	42.273	81.906	0.929	21.362	2038	1.207	0.828	0.939	0.207435
										2522.86				0.256787
370	CEP89_KAN417-6_1.tif:0001-0097	1.499	57.797	0	599	136.625	9.972	0.937	86.633	8265	1.033	0.968	0.944	0.841243
371	CEP89_KAN417-6_1.tif:0002-0118	0.985	28.766	0	257	2.325	12.136	0.876	28.343	2704	1.255	0.797	0.931	0.275223
372	CEP89_KAN417-6_1.tif:0003-0127	1.237	56.458	0	252	75.643	12.982	0.894	69.83	6662	1.092	0.916	0.952	0.678084
373	CEP89_KAN417-6_1.tif:0004-0374	1.541	44.429	0	430	30.876	38.269	0.77	68.457	6531	1.749	0.572	0.899	0.66475
374	CEP89_KAN417-6_1.tif:0005-0434	1.981	71.804	0	640	118.887	44.494	0.779	142.249	13571	1.682	0.595	0.896	1.38131
375	CEP89_KAN417-6_1.tif:0006-0541	1.143	128	0	458	129.651	55.448	0.942	146.243	13952	1.114	0.898	0.952	1.42009
376	CEP89_KAN417-6_1.tif:0007-0714	1.258	27.3	0	264	19.044	73.161	0.964	34.339	3276	1.287	0.777	0.968	0.333444
377	CEP89_KAN417-6_1.tif:0008-0726	1.342	67.266	0	338	69.97	74.381	0.958	90.249	8610	1.288	0.777	0.959	0.876359
378	CEP89_KAN417-6_1.tif:0009-0788	1.247	42.95	0	209	106.301	80.724	0.985	53.573	5111	1.096	0.912	0.964	0.520217
379	CEP89_KAN417-6_1.tif:0010-0809	2.348	155.071	0	1415	38.588	82.777	0.843	364.098	34736	1.418	0.705	0.937	3.53556
380	CEP89_KAN417-6_1.tif:0011-0894	2.096	80.21	0	841	124.88	91.53	0.784	168.15	16042	1.709	0.585	0.895	1.63282
381	CEP89_KAN417-6_1.tif:0012-1015	1.384	15.068	0	146	42.276	103.919	0.82	20.848	1989	1.816	0.551	0.93	0.202448
382	CEP89_KAN417-6_1.tif:0013-1033	1.205	18.843	0	130	41.509	105.807	0.722	22.714	2167	1.988	0.503	0.898	0.220565
383	CEP89_KAN417-6_2.tif:0001-0104	1.457	51.187	0	507	67.2	10.697	0.961	74.578	7115	1.084	0.922	0.942	0.724192
384	CEP89_KAN417-6_2.tif:0002-0149	1.855	43.576	0	395	131.498	15.33	0.785	80.847	7713	1.712	0.584	0.894	0.785058
385	CEP89_KAN417-6_2.tif:0003-0154	1.237	126.661	0	864	35.121	15.81	0.948	156.662	14946	1.102	0.907	0.955	1.52126
386	CEP89_KAN417-6_2.tif:0004-0271	0.996	204.8	0	1860	124.287	27.732	0.957	203.935	19456	1.073	0.932	0.979	1.98031
387	CEP89_KAN417-6_2.tif:0005-0365	0.985	57.096	0	308	76.332	37.345	0.904	56.256	5367	1.398	0.715	0.94	0.546274
388	CEP89_KAN417-6_2.tif:0006-0603	1.384	44.356	0	295	75.261	61.764	0.799	61.371	5855	1.508	0.663	0.895	0.595944
389	CEP89_KAN417-6_2.tif:0007-0619	1.059	29.02	0	308	112.061	63.349	0.941	30.722	2931	1.096	0.913	0.967	0.298328
390	CEP89_KAN417-6_2.tif:0008-0761	1.887	136.817	0	941	45.046	77.98	0.789	258.137	24627	1.845	0.542	0.942	2.50663
391	CEP89_KAN417-6_2.tif:0009-0789	1.216	46.922	0	244	7.423	80.794	0.96	57.053	5443	1.114	0.897	0.955	0.554009
392	CEP89_KAN417-6_2.tif:0010-0861	1.017	88.34	0	433	96.379	88.125	0.875	89.819	8569	1.291	0.775	0.956	0.872185
393	CEP89_KAN417-6_2.tif:0011-0988	1.604	95.523	0	634	56.749	101.197	0.903	153.192	14615	1.395	0.717	0.968	1.48757
394	CEP89_KAN417-6_3.tif:0001-0015	1.226	111.128	0	575	32.551	1.606	0.876	136.285	13002	1.329	0.752	0.914	1.32339
395	CEP89_KAN417-6_3.tif:0002-0138	1.216	103.578	0	714	6.174	14.18	0.96	125.94	12015	1.118	0.895	0.955	1.22293
396	CEP89_KAN417-6_3.tif:0003-0320	1.174	20.518	0	191	132.488	32.77	0.938	24.087	2298	1.216	0.822	0.97	0.233899
397	CEP89_KAN417-6_3.tif:0004-0342	0.839	137.775	0	468	109.548	35.014	0.887	115.531	11022	1.25	0.8	1	1.12186
398	CEP89_KAN417-6_3.tif:0005-0396	1.446	124.406	0	662	4.854	40.573	0.939	179.953	17168	1.188	0.841	0.952	1.74742
399	CEP89_KAN417-6_3.tif:0006-0456	0.985	20.723	0	195	127.678	46.677	0.979	20.419	1948	1.046	0.956	0.974	0.198275
400	CEP89_KAN417-6_3.tif:0007-0520	1.677	99.275	0	528	15.653	53.301	0.889	166.494	15884	1.376	0.727	0.952	1.61673
401	CEP89_KAN417-6_3.tif:0008-0663	1.08	35.33	0	273	97.393	67.883	0.96	38.143	3639	1.098	0.911	0.976	0.370391
402	CEP89_KAN417-6_3.tif:0009-0761	1.824	116.868	0	889	126.722	77.967	0.873	213.149	20335	1.507	0.664	0.933	2.06977
403	CEP89_KAN417-6_3.tif:0010-0789	0.975	66.011	0	255	8.445	80.81	0.937	64.348	6139	1.228	0.814	0.974	0.624851
404	CEP89_KAN417-6_3.tif:0011-0808	1.017	52.948	0	282	89.275	82.748	0.964	53.835	5136	1.109	0.901	0.946	0.522762
405	CEP89_KAN417-6_3.tif:0012-0858	1.75	15.635	0	115	108.225	87.799	0.941	27.368	2611	1.06	0.944	0.949	0.265757
406	CEP89_KAN417-6_3.tif:0013-0945	1.216	74.233	0	443	39.307	96.825	0.905	90.259	8611	1.368	0.731	0.955	0.87646
407	CEP89_KAN417-6_3.tif:0014-0991	1.258	78.675	0	507	89.136	101.456	0.909	98.959	9441	1.128	0.886	0.956	0.960941
408	CEP89_KAN417-6_4.tif:0001-0028	1.478	156.028	0	1075	126.149	2.943	0.934	230.601	22000	1.143	0.875	0.959	2.23924
409	CEP89_KAN417-6_4.tif:0002-0097	1.488	155.648	0	493	101.352	9.97	0.892	231.67	22102	1.108	0.903	0.959	2.24963
410	CEP89_KAN417-6_4.tif:0003-0210	1.426	31.632	0	128	118.378	21.52	0.978	45.093	4302	1.126	0.888	0.954	0.437874
411	CEP89_KAN417-6_4.tif:0004-0265	1.017	23.804	0	158	50.714	27.167	0.933	24.203	2309	1.146	0.873	0.951	0.235019
412	CEP89_KAN417-6_4.tif:0005-0410	0.891	60.506	0	199	71.611	41.98	0.962	53.908	5143	1.119	0.894	0.971	0.523474
413	CEP89_KAN417-6_4.tif:0006-0461	1.688	194	0	1086	127.554	47.232	0.917	327.39	31234	1.178	0.849	0.958	3.17912
414	CEP89_KAN417-6_4.tif:0007-0588	1.237	73.5	0	229	56.303	60.208	0.92	90.909	8673	1.096	0.913	0.955	0.882771
415	CEP89_KAN417-6_4.tif:0008-0605	1.467	195.543	0	1512	121.206	61.981	0.927	286.951	27376	1.166	0.857	0.962	2.78643
416	CEP89_KAN417-6_4.tif:0009-0637	1.646	106.217	0	629	6.516	65.296	0.894	174.795	16676	1.518	0.659	0.96	1.69735
417	CEP89_KAN417-6_4.tif:0010-0686	1.331	122.567	0	622	92.559	70.266	0.951	163.161	15566	1.111	0.9	0.955	1.58437
418	CEP89_KAN417-6_4.tif:0011-0788	1.268	26.306	0	279	84.029	80.706	0.932	33.364	3183	1.204	0.831	0.942	0.323978
419	CEP89_KAN417-6_4.tif:0012-0843	0.891	110.259	0	252	45.442	86.362	0.962	98.236	9372	1.137	0.88	0.977	0.953918
420	CEP89_KAN417-6_4.tif:0013-0898	1.279	79.131	0	495	119.318	91.923	0.924	101.192	9654	1.103	0.906	0.961	0.982621
421	CEP89_KAN417-6_5.tif:0001-0009	1.457	80.525	0	460	47.06	0.931	0.873	117.323	11193	1.333	0.75	0.955	1.13927
422	CEP89_KAN417-6_5.tif:0002-0122	1.143	36.899	0	176	35.416	12.544	0.902	42.158	4022	1.356	0.737	0.936	0.409374
423	CEP89_KAN417-6_5.tif:0003-0124	1.09	115.962	0	346	86.98	12.704	0.939	126.411	12060	1.12	0.893	0.972	1.22751
424	CEP89_KAN417-6_5.tif:0004-0175	1.195	26.886	0	169	96.008	17.987	0.904	32.127	3065	1.5	0.666	0.934	0.311967
425	CEP89_KAN417-6_5.tif:0005-0318	1.876	171.246	0	888	111.309	32.587	0.929	321.3	30653	1.247	0.802	0.942	3.11998
426	CEP89_KAN417-6_5.tif:0006-0403	1.132	19.204	0	146	71.032	41.243	0.905	21.739	2074	1.286	0.778	0.96	0.2111
427	CEP89_KAN417-6_5.tif:0007-0418	1.321	37.198	0	177	89.287	42.757	0.943	49.128	4687	1.099	0.91	0.958	0.477061
428	CEP89_KAN417-6_5.tif:0008-0421	1.583	115.146	0	599	20.522	43.137	0.914	182.248	17387	1.387	0.721	0.968	1.76971
429	CEP89_KAN417-6_5.tif:0009-0476	1.572	110.247	0	793	139.607	48.754	0.922	173.339	16537	1.071	0.933	0.929	1.6832
430	CEP89_KAN417-6_5.tif:0010-0525	1.635	101.724	0	780	62.305	53.715	0.846	166.337	15869	1.343	0.744	0.937	1.61521
431	CEP89_KAN417-6_5.tif:0011-0644	1.426	196.449	0	933	120.905	65.918	0.936	280.044	26717	1.032	0.969	0.975	2.71936
432	CEP89_KAN417-6_5.tif:0012-0647	1.006	118.24	2	378	93.474	66.24	0.967	118.98	11351	1	1	0.98	1.15535
433	CEP89_KAN417-6_5.tif:0013-0714	1.163	143.063	0	656	11.816	73.167	0.959	166.452	15880	1.012	0.988	0.965	1.61633
434	CEP89_KAN417-6_5.tif:0014-0781	1.373	46.16	0	360	120.187	79.941	0.927	63.384	6047	1.184	0.844	0.967	0.615487
435	CEP89_KAN417-6_5.tif:0015-0842	1.038	10.788	0	64	83.251	86.26	0.952	11.195	1068	1.053	0.95	0.952	0.108705
436	CEP89_KAN417-6_5.tif:0016-0858	1.321	36.698	0	155	135.676	87.829	0.943	48.468	4624	1.058	0.945	0.947	0.470648
437	CEP89_KAN417-6_5.tif:0017-0892	1.499	114.741	0	744	41.71	91.322	0.875	171.986	16408	1.349	0.741	0.966	1.67007
438	CEP89_KAN417-6_5.tif:0018-1022	1.593	82.52	0	881	12.998	104.692	0.866	131.474	12543	1.316	0.76	0.93	1.27667
439	CEP89_KAN417-6_6.tif:0001-0012	1.667	51.484	0	470	97.698	1.266	0.853	85.804	8186	1.395	0.717	0.927	0.833202
440	CEP89_KAN417-6_6.tif:0002-0158	1.31	137.24	0	847	30.222	16.213	0.963	179.816	17155	1.2	0.833	0.951	1.7461
441	CEP89_KAN417-6_6.tif:0003-0184	1.488	101.894	0	532	105.914	18.861	0.906	151.662	14469	1.259	0.794	0.947	1.47271
442	CEP89_KAN417-6_6.tif:0004-0203	0.901	179.977	0	1434	137.736	20.765	0.909	162.238	15478	1.16	0.862	0.983	1.57541
443	CEP89_KAN417-6_6.tif:0005-0274	1.604	92.033	0	584	5.05	28.059	0.917	147.595	14081	1.435	0.697	0.947	1.43322
444	CEP89_KAN417-6_6.tif:0006-0315	0.839	46.038	0	240	74.586	32.247	0.973	38.605	3683	1.122	0.891	0.947	0.37487
445	CEP89_KAN417-6_6.tif:0007-0402	1.184	34.009	0	210	96.629	41.164	0.908	40.282	3843	1.204	0.831	0.938	0.391155
446	CEP89_KAN417-6_6.tif:0008-0453	1.446	88.862	0	545	42.636	46.359	0.929	128.539	12263	1.327	0.754	0.939	1.24817
447	CEP89_KAN417-6_6.tif:0009-0546	1.163	109.396	0	524	35.184	55.902	0.902	127.281	12143	1.234	0.81	0.969	1.23596
448	CEP89_KAN417-6_6.tif:0010-0557	1.635	54.192	0	601	129.062	57.003	0.935	88.614	8454	1.117	0.895	0.948	0.86048
449	CEP89_KAN417-6_6.tif:0011-0567	1.394	107.015	0	668	59.488	58.104	0.93	149.188	14233	1.131	0.885	0.94	1.44869
450	CEP89_KAN417-6_6.tif:0012-0647	1.006	137.875	0	863	52	66.232	0.936	138.738	13236	1.007	0.993	0.98	1.34721
451	CEP89_KAN417-6_6.tif:0013-0782	1.132	56.157	0	338	78.583	80.102	0.905	63.572	6065	1.18	0.848	0.952	0.617319
452	CEP89_KAN417-6_6.tif:0014-0991	1.593	108.099	0	601	103.762	101.432	0.888	172.227	16431	1.506	0.664	0.947	1.67241
										11172.3				1.13716
453	CEP89_KAN417-7_1.tif:0001-0135	0.922	194.932	0	1825	105.504	13.811	0.93	179.806	17154	1.11	0.901	0.989	1.746
454	CEP89_KAN417-7_1.tif:0002-0145	1.467	108.95	0	629	49.457	14.926	0.917	159.88	15253	1.053	0.95	0.933	1.55251
455	CEP89_KAN417-7_1.tif:0003-0172	1.384	106.727	0	453	129.143	17.624	0.977	147.668	14088	1.21	0.827	0.943	1.43393
456	CEP89_KAN417-7_1.tif:0004-0291	1.205	90.896	0	442	15.24	29.826	0.924	109.567	10453	1.204	0.831	0.954	1.06395
457	CEP89_KAN417-7_1.tif:0005-0350	1.247	93.261	0	598	92.06	35.885	0.852	116.328	11098	1.407	0.711	0.956	1.1296
458	CEP89_KAN417-7_1.tif:0006-0352	1.258	86.492	0	579	33.929	36.104	0.873	108.791	10379	1.453	0.688	0.93	1.05641
459	CEP89_KAN417-7_1.tif:0007-0361	1.268	87.793	0	551	109.063	36.967	0.801	111.349	10623	1.808	0.553	0.917	1.08125
460	CEP89_KAN417-7_1.tif:0008-0572	1.3	61.484	0	374	71.489	58.585	0.902	79.914	7624	1.243	0.804	0.947	0.776
461	CEP89_KAN417-7_1.tif:0009-0691	1.436	89.869	0	603	34.411	70.808	0.884	129.053	12312	1.364	0.733	0.951	1.25316
462	CEP89_KAN417-7_1.tif:0010-0841	0.849	75.753	0	230	27.75	86.13	0.917	64.317	6136	1.062	0.942	0.953	0.624545
463	CEP89_KAN417-7_1.tif:0011-0855	1.593	59.75	0	381	130.245	87.58	0.866	95.196	9082	1.58	0.633	0.944	0.9244
464	CEP89_KAN417-7_1.tif:0012-0867	1.226	70.615	0	322	57.37	88.784	0.912	86.601	8262	1.357	0.737	0.955	0.840938
465	CEP89_KAN417-7_1.tif:0013-0873	1.08	48.544	0	247	90.661	89.441	0.89	52.409	5000	1.321	0.757	0.936	0.508919
466	CEP89_KAN417-7_2.tif:0001-0127	1.289	104.106	0	595	100.082	13.033	0.895	134.22	12805	1.242	0.805	0.935	1.30334
467	CEP89_KAN417-7_2.tif:0002-0157	1.415	78.378	0	489	57.576	16.139	0.817	110.909	10581	1.618	0.618	0.915	1.07697
468	CEP89_KAN417-7_2.tif:0003-0175	1.237	154.22	0	726	118.69	17.915	0.976	190.749	18198	1.111	0.9	0.963	1.85226
469	CEP89_KAN417-7_2.tif:0004-0276	1.226	92.214	0	509	18.266	28.293	0.912	113.089	10789	1.114	0.897	0.944	1.09815
470	CEP89_KAN417-7_2.tif:0005-0423	1.499	115.839	0	583	74.177	43.34	0.947	173.632	16565	1.107	0.904	0.966	1.68605
471	CEP89_KAN417-7_2.tif:0006-0425	0.86	70.28	0	273	62.467	43.486	0.826	60.407	5763	1.448	0.69	0.901	0.58658
472	CEP89_KAN417-7_2.tif:0007-0534	1.184	135.726	0	867	136.73	54.739	0.976	160.76	15337	1.001	0.999	0.974	1.56106
473	CEP89_KAN417-7_2.tif:0008-0610	0.839	57.775	0	222	139.23	62.492	0.939	48.447	4622	1.376	0.727	0.958	0.470445
474	CEP89_KAN417-7_2.tif:0009-0638	1.143	101.661	0	455	93.858	65.302	0.913	116.149	11081	1.28	0.781	0.965	1.12787
475	CEP89_KAN417-7_2.tif:0010-0854	1.247	69.714	0	512	20.824	87.459	0.876	86.958	8296	1.544	0.648	0.975	0.844398
476	CEP89_KAN417-7_2.tif:0011-0951	1.551	115.588	0	931	116.963	97.361	0.92	179.313	17107	1.221	0.819	0.952	1.74122
477	CEP89_KAN417-7_3.tif:0001-0038	1.059	53.97	0	319	66.998	3.896	0.941	57.137	5451	1.136	0.88	0.957	0.554823
478	CEP89_KAN417-7_3.tif:0002-0124	1.027	39.643	0	159	59.646	12.684	0.943	40.722	3885	1.139	0.878	0.956	0.39543
479	CEP89_KAN417-7_3.tif:0003-0191	1.352	64.341	0	265	23.442	19.592	0.902	86.999	8300	1.29	0.775	0.935	0.844806
480	CEP89_KAN417-7_3.tif:0004-0216	1.101	77.171	0	377	128.662	22.163	0.965	84.935	8103	1.048	0.954	0.95	0.824754
481	CEP89_KAN417-7_3.tif:0005-0320	1.562	96.322	0	457	125.809	32.739	0.95	150.436	14352	1.185	0.844	0.961	1.4608
482	CEP89_KAN417-7_3.tif:0006-0450	1.038	30.364	0	248	50.496	46.145	0.91	31.508	3006	1.373	0.728	0.93	0.305962
483	CEP89_KAN417-7_3.tif:0007-0495	0.943	93.356	0	400	128.903	50.669	0.85	88.069	8402	1.552	0.644	0.968	0.855187
484	CEP89_KAN417-7_3.tif:0008-0641	1.237	73.39	0	471	82.306	65.691	0.92	90.773	8660	1.328	0.753	0.959	0.881448
485	CEP89_KAN417-7_3.tif:0009-0644	1.268	55.579	0	429	21.169	65.996	0.891	70.491	6725	1.328	0.753	0.964	0.684496
486	CEP89_KAN417-7_3.tif:0010-0676	1.446	70.232	0	472	124.751	69.235	0.965	101.59	9692	1.082	0.925	0.962	0.986489
487	CEP89_KAN417-7_3.tif:0011-0765	0.985	118.457	1	707	118.856	78.313	0.979	116.716	11135	1.046	0.956	0.974	1.13336
488	CEP89_KAN417-7_3.tif:0012-0816	1.572	92.18	0	706	31.217	83.494	0.932	144.933	13827	1.183	0.845	0.965	1.40736
489	CEP89_KAN417-7_3.tif:0013-0886	1.436	28.942	0	168	59.878	90.748	0.83	41.561	3965	1.726	0.579	0.932	0.403573
490	CEP89_KAN417-7_3.tif:0014-0955	0.839	34.175	0	153	72.282	97.817	0.973	28.657	2734	1.145	0.873	0.952	0.278277
491	CEP89_KAN417-7_4.tif:0001-0007	1.163	69.811	0	423	10.685	0.746	0.851	81.224	7749	1.257	0.796	0.961	0.788723
492	CEP89_KAN417-7_4.tif:0002-0070	1.247	69.37	0	468	17.288	7.18	0.788	86.528	8255	1.387	0.721	0.869	0.840225
493	CEP89_KAN417-7_4.tif:0003-0100	1.31	101.048	0	606	94.354	10.251	0.947	132.396	12631	1.097	0.912	0.977	1.28563
494	CEP89_KAN417-7_4.tif:0004-0228	1.73	88.879	0	578	141.143	23.351	0.856	153.716	14665	1.437	0.696	0.919	1.49266
495	CEP89_KAN417-7_4.tif:0005-0296	1.415	41.422	0	225	26.95	30.261	0.817	58.615	5592	1.359	0.736	0.922	0.569175
496	CEP89_KAN417-7_4.tif:0006-0360	0.891	152.341	0	942	119.167	36.913	0.997	135.73	12949	1.119	0.894	0.971	1.318
497	CEP89_KAN417-7_4.tif:0007-0372	1.384	115.227	0	587	109.058	38.106	0.923	159.429	15210	1.292	0.774	0.94	1.54813
498	CEP89_KAN417-7_4.tif:0008-0482	1.09	75.827	0	358	70.723	49.365	0.846	82.66	7886	1.2	0.833	0.933	0.802667
499	CEP89_KAN417-7_4.tif:0009-0505	1.163	77.198	0	424	120.908	51.715	0.93	89.819	8569	1.23	0.813	0.965	0.872185
500	CEP89_KAN417-7_4.tif:0010-0672	1.363	67.969	0	352	40.398	68.859	0.885	92.618	8836	1.27	0.788	0.935	0.899362
501	CEP89_KAN417-7_4.tif:0011-0746	0.943	51.733	0	282	119.849	76.415	0.938	48.804	4656	1.252	0.799	0.957	0.473905
502	CEP89_KAN417-7_4.tif:0012-0757	1.457	48.281	0	358	91.055	77.485	0.833	70.344	6711	1.365	0.733	0.897	0.683071
503	CEP89_KAN417-7_4.tif:0013-0853	1.352	74.426	0	419	39.787	87.346	0.939	100.636	9601	1.142	0.875	0.97	0.977226
504	CEP89_KAN417-7_4.tif:0014-0882	1.96	79.107	0	468	81.808	90.313	0.868	155.058	14793	1.345	0.743	0.919	1.50569
505	CEP89_KAN417-7_4.tif:0015-0930	1.059	118.495	0	686	132.264	95.26	0.972	125.447	11968	1.094	0.914	0.967	1.21815
506	CEP89_KAN417-7_4.tif:0016-0995	1.499	72.028	0	426	41.107	101.942	0.866	107.963	10300	1.469	0.681	0.938	1.04837
507	CEP89_KAN417-7_5.tif:0001-0122	1.048	65.05	0	302	36.046	12.519	0.903	68.184	6505	1.36	0.735	0.966	0.662104
508	CEP89_KAN417-7_5.tif:0002-0126	1.604	115.588	0	668	134.135	12.912	0.926	185.372	17685	1.221	0.819	0.962	1.80005
509	CEP89_KAN417-7_5.tif:0003-0159	1.3	33.492	0	107	92.139	16.284	0.955	43.531	4153	1.091	0.916	0.95	0.422708
510	CEP89_KAN417-7_5.tif:0004-0202	0.975	189.032	0	1455	24.277	20.685	0.969	184.271	17580	1.024	0.977	0.969	1.78936
511	CEP89_KAN417-7_5.tif:0005-0302	1.216	69.733	0	386	41.465	30.966	0.879	84.788	8089	1.422	0.703	0.947	0.823329
512	CEP89_KAN417-7_5.tif:0006-0340	1.132	88.315	0	541	111.654	34.854	0.933	99.976	9538	1.038	0.963	0.947	0.970814
513	CEP89_KAN417-7_5.tif:0007-0381	0.954	68.451	0	412	11.108	39.058	0.859	65.292	6229	1.349	0.741	0.958	0.634011
514	CEP89_KAN417-7_5.tif:0008-0389	1.352	71.822	0	365	99.658	39.89	0.939	97.114	9265	1.197	0.836	0.959	0.943027
515	CEP89_KAN417-7_5.tif:0009-0456	0.922	40.943	0	207	1.843	46.646	0.917	37.766	3603	1.051	0.952	0.951	0.366727
516	CEP89_KAN417-7_5.tif:0010-0529	1.499	120.643	0	705	86.895	54.166	0.937	180.833	17252	1.319	0.758	0.941	1.75597
517	CEP89_KAN417-7_5.tif:0011-0582	1.373	77.588	0	323	22.819	59.564	0.927	106.538	10164	1.064	0.94	0.963	1.03453
518	CEP89_KAN417-7_5.tif:0012-0857	1.394	111.489	0	654	116.514	87.744	0.968	155.425	14828	1.018	0.983	0.971	1.50925
519	CEP89_KAN417-7_5.tif:0013-0895	1.153	71.727	0	303	82.367	91.58	0.858	82.702	7890	1.205	0.83	0.913	0.803074
520	CEP89_KAN417-7_5.tif:0014-0985	1.184	79.92	0	506	65.416	100.843	0.919	94.662	9031	1.185	0.844	0.97	0.919209
521	CEP89_KAN417-7_5.tif:0015-1027	1.31	77.768	0	326	24.907	105.196	0.91	101.894	9721	1.253	0.798	0.947	0.98944
522	CEP89_KAN417-7_6.tif:0001-0020	0.891	29.471	0	244	49.516	2.11	0.916	26.257	2505	1.269	0.788	0.934	0.254968
523	CEP89_KAN417-7_6.tif:0002-0104	1.426	69.949	0	621	115.605	10.66	0.845	99.714	9513	1.534	0.652	0.925	0.968269
524	CEP89_KAN417-7_6.tif:0003-0203	1.342	50.891	0	324	83.32	20.874	0.848	68.279	6514	1.412	0.708	0.928	0.66302
525	CEP89_KAN417-7_6.tif:0004-0387	1.027	27.367	0	116	108.123	39.689	0.943	28.112	2682	1.184	0.844	0.956	0.272984
526	CEP89_KAN417-7_6.tif:0005-0486	1.562	60.906	0	533	66.839	49.747	0.82	95.123	9075	1.203	0.832	0.909	0.923688
527	CEP89_KAN417-7_6.tif:0006-0579	0.943	77.822	0	227	116.498	59.289	0.97	73.415	7004	1.044	0.958	0.957	0.712894
528	CEP89_KAN417-7_6.tif:0007-0632	1.205	107.287	0	654	40.169	64.734	0.981	129.325	12338	1.14	0.877	0.95	1.25581
529	CEP89_KAN417-7_6.tif:0008-0888	1.488	45.908	0	393	108.251	91.032	0.829	68.331	6519	1.352	0.74	0.919	0.663529
530	CEP89_KAN417-7_6.tif:0009-0908	0.891	39.094	0	138	130.142	93.018	0.929	34.831	3323	1.098	0.911	0.971	0.338228
531	CEP89_KAN417-7_6.tif:0010-0967	1.614	83.695	0	498	100.26	98.992	0.877	135.101	12889	1.35	0.741	0.936	1.31189
										9634.32				0.980617
532	CEP89_KAN417-8_1.tif:0001-0119	1.038	74.677	0	380	73.866	12.181	0.922	77.492	7393	1.103	0.906	0.952	0.752488
533	CEP89_KAN417-8_1.tif:0002-0165	1.688	83.851	0	485	117.075	16.904	0.844	141.505	13500	1.459	0.685	0.936	1.37408
534	CEP89_KAN417-8_1.tif:0003-0257	1.195	64.14	0	401	18.808	26.31	0.83	76.643	7312	1.58	0.633	0.908	0.744243
535	CEP89_KAN417-8_1.tif:0004-0384	1.122	112.131	0	524	75.485	39.344	0.924	125.761	11998	1.19	0.84	0.943	1.2212
536	CEP89_KAN417-8_1.tif:0005-0576	0.839	103.362	2	398	124.7	59.023	0.845	86.674	8269	1.516	0.659	0.952	0.84165
537	CEP89_KAN417-8_1.tif:0006-0590	0.86	30.098	0	86	118.863	60.471	0.962	25.869	2468	1.088	0.919	0.959	0.251202
538	CEP89_KAN417-8_1.tif:0007-0750	1.153	58.473	0	328	32.472	76.821	0.91	67.419	6432	1.295	0.772	0.928	0.654673
539	CEP89_KAN417-8_1.tif:0008-0796	1.216	89.328	0	521	131.056	81.502	0.916	108.613	10362	1.219	0.821	0.987	1.05468
540	CEP89_KAN417-8_1.tif:0009-0823	1.625	76.445	0	519	73.477	84.273	0.853	124.2	11849	1.616	0.619	0.92	1.20604
541	CEP89_KAN417-8_1.tif:0010-0858	1.163	87.757	0	453	103.444	87.854	0.918	102.104	9741	1.305	0.766	0.929	0.991476
542	CEP89_KAN417-8_2.tif:0001-0225	1.656	79.658	0	465	111.319	23.11	0.857	131.925	12586	1.333	0.75	0.952	1.28105
543	CEP89_KAN417-8_2.tif:0002-0251	0.943	23.833	0	240	14.009	25.701	0.97	22.484	2145	1.049	0.953	0.952	0.218326
544	CEP89_KAN417-8_2.tif:0003-0279	1.048	45.53	0	173	32.387	28.572	0.994	47.724	4553	1.099	0.91	0.962	0.463422
545	CEP89_KAN417-8_2.tif:0004-0368	1.384	44.136	0	299	40.584	37.68	0.791	61.067	5826	1.596	0.627	0.877	0.592992
546	CEP89_KAN417-8_2.tif:0005-0442	1.122	103.355	0	448	88.292	45.299	0.924	115.919	11059	1.111	0.9	0.951	1.12563
547	CEP89_KAN417-8_2.tif:0006-0644	1.593	66.303	0	529	61.635	65.987	0.845	105.636	10078	1.371	0.729	0.935	1.02578
548	CEP89_KAN417-8_2.tif:0007-0690	1.268	355.694	0	3905	31.061	70.631	0.972	451.129	43039	1.098	0.91	0.968	4.38067
549	CEP89_KAN417-8_2.tif:0008-0710	1.184	42	0	192	109.673	72.743	0.881	49.747	4746	1.4	0.714	0.946	0.483066
550	CEP89_KAN417-8_2.tif:0009-0836	1.279	5.754	0	45	114.131	85.643	0.808	7.358	702	1.773	0.564	0.917	0.0714522
551	CEP89_KAN417-8_2.tif:0010-0851	0.901	399.349	1	3791	115.998	87.177	0.974	359.989	34344	1.11	0.901	0.977	3.49566
552	CEP89_KAN417-8_2.tif:0011-0977	1.163	80.162	0	522	60.599	100.038	0.93	93.268	8898	1.235	0.81	0.965	0.905672
553	CEP89_KAN417-8_3.tif:0001-0175	1.08	125.252	0	491	13.832	17.954	0.96	135.226	12901	1.107	0.903	0.972	1.31311
554	CEP89_KAN417-8_3.tif:0002-0179	1.31	99.832	0	568	48.881	18.341	0.884	130.803	12479	1.448	0.691	0.958	1.27016
555	CEP89_KAN417-8_3.tif:0003-0233	1.342	67.32	0	456	83.454	23.848	0.931	90.322	8617	1.165	0.858	0.959	0.877071
556	CEP89_KAN417-8_3.tif:0004-0248	1.205	33.504	0	196	106.771	25.425	0.871	40.387	3853	1.571	0.636	0.962	0.392173
557	CEP89_KAN417-8_3.tif:0005-0455	1.069	71.931	0	428	46.167	46.642	0.855	76.905	7337	1.27	0.787	0.923	0.746788
558	CEP89_KAN417-8_3.tif:0006-0573	1.09	91.885	0	510	82.775	58.648	0.939	100.165	9556	1.116	0.896	0.977	0.972646
559	CEP89_KAN417-8_3.tif:0007-0672	1.384	97.015	0	583	120.101	68.854	0.851	134.231	12806	1.497	0.668	0.946	1.30344
560	CEP89_KAN417-8_3.tif:0008-0919	1.143	120.486	0	684	101.325	94.086	0.826	137.658	13133	1.414	0.707	0.912	1.33673
561	CEP89_KAN417-8_4.tif:0001-0091	1.069	52.676	0	230	79.003	9.335	0.938	56.319	5373	1.028	0.973	0.936	0.546884
562	CEP89_KAN417-8_4.tif:0002-0247	1.258	71.633	0	341	128.817	25.262	0.873	90.102	8596	1.517	0.659	0.938	0.874934
563	CEP89_KAN417-8_4.tif:0003-0268	1.488	97.915	0	638	99.427	27.447	0.956	145.74	13904	1.26	0.794	0.947	1.4152
564	CEP89_KAN417-8_4.tif:0004-0349	1.289	81.439	0	476	52.802	35.751	0.87	104.997	10017	1.344	0.744	0.943	1.01957
565	CEP89_KAN417-8_4.tif:0005-0631	1.153	80.218	0	486	72.125	64.666	0.98	92.492	8824	1.024	0.976	0.961	0.89814
566	CEP89_KAN417-8_4.tif:0006-0654	1.614	69.818	0	287	140.765	67.033	0.807	112.701	10752	1.492	0.67	0.919	1.09438
567	CEP89_KAN417-8_4.tif:0007-0886	0.901	77.093	0	284	43.942	90.717	0.927	69.495	6630	1.17	0.854	0.94	0.674827
568	CEP89_KAN417-8_4.tif:0008-0958	1.279	24.328	0	152	92.226	98.073	0.997	31.11	2968	1.037	0.965	0.946	0.302094
569	CEP89_KAN417-8_5.tif:0001-0058	1.017	148.443	0	381	87.792	6	0.916	150.928	14399	1.22	0.82	0.99	1.46558
570	CEP89_KAN417-8_5.tif:0002-0165	1.467	88.936	0	556	125.136	16.935	0.917	130.51	12451	1.414	0.707	0.952	1.26731
571	CEP89_KAN417-8_5.tif:0003-0195	1.31	28.168	0	294	68.714	20	0.952	36.907	3521	1.119	0.893	0.919	0.358381
572	CEP89_KAN417-8_5.tif:0004-0267	1.331	59.008	0	251	126.942	27.352	0.951	78.551	7494	1.08	0.926	0.955	0.762768
573	CEP89_KAN417-8_5.tif:0005-0411	0.87	84.759	0	339	2.26	42.099	0.908	73.74	7035	1.125	0.889	0.965	0.716049
574	CEP89_KAN417-8_5.tif:0006-0548	1.111	58.075	0	439	31.274	56.169	0.916	64.526	6156	1.068	0.937	0.942	0.626581
575	CEP89_KAN417-8_5.tif:0007-0693	1.405	85.015	0	464	77.264	71.056	0.927	119.409	11392	1.03	0.971	0.924	1.15952
576	CEP89_KAN417-8_5.tif:0008-0894	1.09	74.885	0	401	44.469	91.536	0.882	81.633	7788	1.351	0.74	0.981	0.792692
577	CEP89_KAN417-8_5.tif:0009-0982	1.698	82.426	0	708	104.854	100.576	0.891	139.964	13353	1.214	0.824	0.931	1.35912
578	CEP89_KAN417-8_5.tif:0010-1019	0.901	26.907	0	104	31.717	104.369	0.927	24.255	2314	1.233	0.811	0.945	0.235528
579	CEP89_KAN417-8_6.tif:0001-0046	1.122	36.654	0	259	36.612	4.765	0.896	41.11	3922	1.509	0.663	0.973	0.399196
580	CEP89_KAN417-8_6.tif:0002-0108	1.163	75.414	0	438	49.509	11.108	0.93	87.744	8371	1.161	0.861	0.965	0.852032
581	CEP89_KAN417-8_6.tif:0003-0163	1.048	100.2	0	401	88.815	16.688	0.994	105.028	10020	1.117	0.895	0.962	1.01987
582	CEP89_KAN417-8_6.tif:0004-0331	1.132	136.806	0	806	15.622	33.917	0.933	154.869	14775	1.219	0.82	0.96	1.50386
583	CEP89_KAN417-8_6.tif:0005-0411	1.069	28	0	165	2.026	42.062	0.968	29.936	2856	1.189	0.841	0.936	0.290695
584	CEP89_KAN417-8_6.tif:0006-0419	1.038	57.384	0	185	82.688	42.902	0.922	59.547	5681	1.201	0.833	0.957	0.578234
585	CEP89_KAN417-8_6.tif:0007-0486	1.415	92.17	0	615	128.331	49.784	0.944	130.426	12443	1.308	0.765	0.951	1.2665
586	CEP89_KAN417-8_6.tif:0008-0557	1.509	91.944	0	455	85.704	57.004	0.919	138.78	13240	1.339	0.747	0.947	1.34762
587	CEP89_KAN417-8_6.tif:0009-0585	1.195	95.447	0	459	26.438	59.888	0.874	114.053	10881	1.222	0.818	0.974	1.10751
588	CEP89_KAN417-8_6.tif:0010-0686	1.373	63.511	0	399	115.473	70.301	0.916	87.209	8320	1.255	0.797	0.939	0.846841
589	CEP89_KAN417-8_6.tif:0011-0710	1.122	38.252	0	228	19.473	72.667	0.924	42.902	4093	1.198	0.835	0.96	0.416601
590	CEP89_KAN417-8_6.tif:0012-0783	1.73	7.345	0	94	139.467	80.108	0.954	12.704	1212	1.085	0.922	0.954	0.123362
591	CEP89_KAN417-8_6.tif:0013-0813	0.891	140.282	0	921	53.294	83.231	0.962	124.986	11924	1.176	0.85	0.977	1.21367
592	CEP89_KAN417-8_6.tif:0014-0929	1.195	69.667	0	478	125.996	95.16	0.889	83.247	7942	1.394	0.718	0.946	0.808367
593	CEP89_KAN417-8_6.tif:0015-0929	1.195	41.167	0	317	24.977	95.138	0.943	49.191	4693	1.179	0.848	0.946	0.477671
594	CEP89_KAN417-8_6.tif:0016-0999	1.122	47.421	0	216	137.542	102.333	0.953	53.185	5074	1.08	0.926	0.947	0.516451
										9307.87				0.947391

## Sheet: IF condition
Exp. number	Cell line	Gene induced	Culture condition, fixation condition	rabbit-Alexa488	mouse IgG1-Alexa568	mouse IgG2b-Alexa647	Nuclear stain	Date	Replicate
KAN417-1	RPE-BFP-Cas9 pMCB306 (pool)		Fixed in MeOH, 24 hour serum starvation	CEP89, 24002-1-AP, Proteintech, 1:500	CEP170, Invitrogen, 41-3200, 1:1000	Ac-Tub, 6B-11, SIGMA, 1:2000	DAPI	2018-12-11	No.1
KAN417-2	RPE-BFP-Cas9 CEP89KO (pool)		Fixed in MeOH, 24 hour serum starvation	CEP89, 24002-1-AP, Proteintech, 1:500	CEP170, Invitrogen, 41-3200, 1:1000	Ac-Tub, 6B-11, SIGMA, 1:2000	DAPI	2018-12-11	No.1
KAN417-3	RPE-BFP-Cas9 NCS1KO (pool)		Fixed in MeOH, 24 hour serum starvation	CEP89, 24002-1-AP, Proteintech, 1:500	CEP170, Invitrogen, 41-3200, 1:1000	Ac-Tub, 6B-11, SIGMA, 1:2000	DAPI	2018-12-11	No.1
KAN417-4	RPE-BFP-Cas9 C3orf14KO (pool)		Fixed in MeOH, 24 hour serum starvation	CEP89, 24002-1-AP, Proteintech, 1:500	CEP170, Invitrogen, 41-3200, 1:1000	Ac-Tub, 6B-11, SIGMA, 1:2000	DAPI	2018-12-11	No.1
KAN417-5	RPE-BFP-Cas9 CEP89KO (pool)	pWPXLd/blast/FLAG(N)-empty	Fixed in MeOH, 24 hour serum starvation	CEP89, 24002-1-AP, Proteintech, 1:500	CEP170, Invitrogen, 41-3200, 1:1000	Ac-Tub, 6B-11, SIGMA, 1:2000	DAPI	2018-12-11	No.1
KAN417-6	RPE-BFP-Cas9 CEP89KO (pool)	pWPXLd/blast/minimal CMV promoter/nontag CEP89	Fixed in MeOH, 24 hour serum starvation	CEP89, 24002-1-AP, Proteintech, 1:500	CEP170, Invitrogen, 41-3200, 1:1000	Ac-Tub, 6B-11, SIGMA, 1:2000	DAPI	2018-12-11	No.1
KAN417-7	RPE-BFP-Cas9 NCS1KO (pool)	pWPXLd/blast/FLAG(N)-empty	Fixed in MeOH, 24 hour serum starvation	CEP89, 24002-1-AP, Proteintech, 1:500	CEP170, Invitrogen, 41-3200, 1:1000	Ac-Tub, 6B-11, SIGMA, 1:2000	DAPI	2018-12-11	No.1
KAN417-8	RPE-BFP-Cas9 NCS1KO (pool)	pWPXLd/LAPC/blast/NCS1/long EF	Fixed in MeOH, 24 hour serum starvation	CEP89, 24002-1-AP, Proteintech, 1:500	CEP170, Invitrogen, 41-3200, 1:1000	Ac-Tub, 6B-11, SIGMA, 1:2000	DAPI	2018-12-11	No.1

## Sheet: After ROUT
sgGFP	CEP89 KO	NCS1 KO	C3ORF14 KO	CEP89 KO + empty	CEP89 KO +CEP89-WT	NCS1 KO + empty	NCS1 KO + NCS1-WT
0.980687		1.27494	0.785466	0.425151	0.841243	1.746	0.752488
1.20156		1.37825	1.37296	0.17232	0.275223	1.55251	1.37408
0.514212	0.125601	0.87076	0.462709	0.227283	0.678084	1.43393	0.744243
0.759714	0.112471	0.787298	0.801649	0.0644291	0.66475	1.06395	1.2212
1.33469	0.304028	0.503219	0.272984	0.280618	1.38131	1.1296	0.84165
0.786076	0.302094	0.977837	0.474211	0.104328	1.42009	1.05641	0.251202
1.23942	0.372122	1.02425	1.22202	0.113285	0.333444	1.08125	0.654673
0.891117	0.161938	1.24207	0.545256	0.229014	0.876359	0.776	1.05468
1.31199	0.274206	1.20105	0.626276	0.170183	0.520217	1.25316	1.20604
0.40286	0.151353	0.638795	1.0896		3.53556	0.624545	0.991476
0.67961	0.136289	1.29235	0.998804	0.234815	1.63282	0.9244	1.28105
	0.194305	0.90496	1.22395	0.378229	0.202448	0.840938	0.218326
0.632281	0.104939	0.934375	0.582916	0.187384	0.220565	0.508919	0.463422
0.0375582	0.178325	0.983944	0.944757	0.162651	0.724192	1.30334	0.592992
0.91351	0.109621	1.10496	2.04911	0.450495	0.785058	1.07697	1.12563
1.48574	0.141276	1.05	1.17306	0.264129	1.52126	1.85226	1.02578
0.5535	0.260974	1.18558	0.404896	0.194509	1.98031	1.09815
1.32329	0.238887	0.872389	1.23881	0.0355225	0.546274	1.68605	0.483066
0.141785	0.152777	0.742004	0.562864	0.398178	0.595944	0.58658	0.0714522
1.87984	0.212525	1.36441	1.40197	0.137408	0.298328	1.56106
0.156747	0.189929	0.585359	0.189929	0.362045	2.50663	0.470445	0.905672
0.495178	0.196341	1.75547	0.850607		0.554009	1.12787	1.31311
1.58192	0.248251	0.928472	0.854984	0.0751164	0.872185	0.844398	1.27016
1.0157	0.140665	0.810606	0.949337	0.268709	1.48757	1.74122	0.877071
1.10435	0.33497	0.938956	1.19688	0.0681951	1.32339	0.554823	0.392173
1.55851	0.172116	0.766839	0.694267	0.222398	1.22293	0.39543	0.746788
1.02059	0.147688	1.90814	1.10456	0.222296	0.233899	0.844806	0.972646
0.865162	0.211201	1.81562	1.13703	0.158477	1.12186	0.824754	1.30344
0.879412	0.0483473	0.759714		0.213848	1.74742	1.4608	1.33673
1.01489	0.149317	0.64765	0.871066	0.0516044	0.198275	0.305962	0.546884
1.15321	0.124889	1.87048	1.23321	0.112471	1.61673	0.855187	0.874934
0.740375	0.0449884	1.23006	0.730706	0.275325	0.370391	0.881448	1.4152
0.681137	0.248251	0.38342	0.85478	0.245706	2.06977	0.684496	1.01957
0.657625	0.157765	1.05132	0.985165	0.177002	0.624851	0.986489	0.89814
0.185857	0.347795	1.8033	1.03982	0.190845	0.522762	1.13336	1.09438
2.17023	0.125398	1.4266	1.1011	0.0864145	0.265757	1.40736	0.674827
1.07148		0.580269	1.65836	0.217614	0.87646	0.403573	0.302094
0.588209	0.249777	0.278175	1.08328	0.209166	0.960941	0.278277	1.46558
1.26935	0.199903	0.808672	1.62518	0.138731	2.23924	0.788723	1.26731
1.09377	0.25049	1.07982	1.45439	0.0660577	2.24963	0.840225	0.358381
0.414464	0.269422	1.36787	0.814169	0.113387	0.437874	1.28563	0.762768
1.22263		0.592483	0.803481	0.105652	0.235019	1.49266	0.716049
0.618846	0.108298	0.474414	0.702512	0.238785	0.523474	0.569175	0.626581
0.288862	0.285096	0.144024	0.677066	0.307591	3.17912	1.318	1.15952
0.926436	0.14667	1.16054	1.08909	0.0533347	0.882771	1.54813	0.792692
0.831981	0.198987	2.11049	0.943739	0.23624	2.78643	0.802667	1.35912
1.21642	0.15461	0.289677	1.15464	0.132828	1.69735	0.872185	0.235528
0.982723		1.60432	0.887962	0.084277	1.58437	0.899362	0.399196
1.09723	0.145754	1.24502	1.02323	0.0784753	0.323978	0.473905	0.852032
1.34864	0.420265	1.68086	0.782717	0.252017	0.953918	0.683071	1.01987
1.64544	0.0777628	1.22456	0.909336	0.169572	0.982621	0.977226	1.50386
0.69498	0.218123	0.716762	1.05865	0.102903	1.13927	1.50569	0.290695
1.24889	0.1084	0.685616	1.10914	0.332019	0.409374	1.21815	0.578234
1.26812	0.355734	1.13886	0.779969	0.0987303	1.22751	1.04837	1.2665
1.45877	0.273086	1.50538	0.763887	0.0804092	0.311967	0.662104	1.34762
0.923383	0.166009	0.701698	1.17092	0.129774	3.11998	1.80005	1.10751
1.55139		1.23637	0.25334	0.285096	0.2111	0.422708	0.846841
0.909845	0.0585257	1.36136	1.20868	0.231151	0.477061	1.78936	0.416601
1.99812	0.173134	0.988015	0.821395	0.157968	1.76971	0.823329	0.123362
1.15433		0.90954	0.464847	0.113998	1.6832	0.970814	1.21367
0.698949	0.248454		0.46505		1.61521	0.634011	0.808367
0.590855	0.201227	1.90682	1.54426	0.15919	2.71936	0.943027	0.477671
0.832286	0.16377	0.865977	1.05295	0.173032	1.15535	0.366727	0.516451
0.540268	0.0965928	0.728874	2.12525	0.353597	1.61633	1.75597
0.74689	0.110232	1.0554	1.30141	0.236342	0.615487	1.03453
0.954834	0.143312	1.03005	1.13194	0.311051	0.108705	1.50925
0.826993	0.197766	1.50956	1.67383	0.173236	0.470648	0.803074
	0.114303	0.440011	1.615	0.149215	1.67007	0.919209
	0.224942		0.642154	0.0939465	1.27667	0.98944
	0.141174		2.08962	0.199089	0.833202	0.254968
	0.121733		0.643477	0.104837	1.7461	0.968269
	0.409883		1.3182	0.272781	1.47271	0.66302
			2.04087		1.57541	0.272984
				0.0925215	1.43322	0.923688
				0.150233	0.37487	0.712894
				0.175068	0.391155	1.25581
				0.168961	1.24817	0.663529
					1.23596	0.338228
				0.0290084	0.86048	1.31189
				0.173338	1.44869
				0.328151	1.34721
				0.0908929	0.617319
				0.156442	1.67241
				0.0837681
				0.0939465
				0.31838
				0.100664
				0.207435
