# Supplementary material for: Myristoylated Neuronal Calcium Sensor-1 captures the preciliary vesicle at distal appendages
Source: eLife. 2025 Jan 30;14:e85998. doi: 10.7554/eLife.85998 (PMC11984960; doi:10.7554/eLife.85998)
Supplement: Figure 2—figure supplement 2—source data 2. [file elife-85998-fig2-figsupp2-data2.xlsx]

## Sheet: Raw data
	Label	Area	Mean	Min	Max	X	Y	Circ	IntDen	RawIntDen	AR	Round	Solidity
	RPE-BFP-Cas9 pMCB306 (pool)
1	NCS1_KAN418-1_1.tif:0001-0257	0.87	175.699	0	807	126.52	26.329	0.959	152.857	14583	1.093	0.915	0.927	0.616819
2	NCS1_KAN418-1_1.tif:0002-0538	0.996	261.979	0	1339	78.515	55.126	0.902	260.873	24888	1.031	0.97	0.922	1.05269
3	NCS1_KAN418-1_1.tif:0003-0576	1.09	144.019	0	1465	28.206	59.022	0.915	156.997	14978	1.352	0.739	0.929	0.633526
4	NCS1_KAN418-1_1.tif:0004-0582	0.912	217.195	0	767	99.682	59.627	0.877	198.065	18896	1.198	0.835	0.941	0.799247
5	NCS1_KAN418-1_1.tif:0005-0642	1.436	130.832	0	1220	97.557	65.683	0.833	187.877	17924	1.501	0.666	0.89	0.758134
6	NCS1_KAN418-1_2.tif:0001-0144	1.363	175.208	0	1208	116.948	14.777	0.787	238.745	22777	1.983	0.504	0.929	0.963402
7	NCS1_KAN418-1_2.tif:0002-0219	0.933	208.303	0	1262	13.3	22.409	0.818	194.323	18539	1.612	0.62	0.877	0.784147
8	NCS1_KAN418-1_2.tif:0003-0290	0.975	174.645	0	986	78.593	29.76	0.747	170.246	16242	1.787	0.56	0.838	0.68699
9	NCS1_KAN418-1_2.tif:0004-0705	1.143	197.972	0	1240	71.823	72.218	0.865	226.188	21579	1.408	0.71	0.89	0.91273
10	NCS1_KAN418-1_2.tif:0005-1001	0.985	228.468	0	1252	10.086	102.487	0.892	225.108	21476	1.338	0.747	0.917	0.908373
11	NCS1_KAN418-1_3.tif:0001-0383	1.625	138.774	0	1246	34.867	39.208	0.832	225.465	21510	1.508	0.663	0.904	0.909811
12	NCS1_KAN418-1_3.tif:0002-0427	0.849	317.84	0	1906	73.079	43.764	0.936	269.855	25745	1.233	0.811	0.926	1.08894
13	NCS1_KAN418-1_3.tif:0003-0610	1.625	249.632	0	2023	133.72	62.465	0.736	405.575	38693	2.224	0.45	0.878	1.6366
14	NCS1_KAN418-1_3.tif:0004-0774	0.912	258.391	0	1661	74.05	79.32	0.865	235.632	22480	1.438	0.695	0.916	0.95084
15	NCS1_KAN418-1_3.tif:0005-0928	1.436	295.204	0	2352	104.779	95.049	0.754	423.918	40443	1.835	0.545	0.862	1.71062
16	NCS1_KAN418-1_4.tif:0001-0184	0.891	196.482	0	919	88.914	18.823	0.962	175.058	16701	1.137	0.88	0.977	0.706404
17	NCS1_KAN418-1_4.tif:0002-0255	0.996	362.442	0	1993	114.933	26.099	0.944	360.911	34432	1.114	0.898	0.936	1.45637
18	NCS1_KAN418-1_4.tif:0003-0404	1.153	216.582	0	1523	125.777	41.436	0.883	249.72	23824	1.412	0.708	0.932	1.00769
19	NCS1_KAN418-1_4.tif:0004-0415	1.446	223.855	0	1617	32.438	42.447	0.706	323.806	30892	2.346	0.426	0.926	1.30664
20	NCS1_KAN418-1_4.tif:0005-0592	0.86	276.159	0	1188	73.525	60.672	0.928	237.362	22645	1.141	0.877	0.953	0.957819
21	NCS1_KAN418-1_4.tif:0006-0615	0.88	192.5	0	968	4.044	63.046	0.971	169.492	16170	1.294	0.773	0.933	0.683945
22	NCS1_KAN418-1_4.tif:0007-0821	1.184	214.204	0	1404	93.965	84.114	0.813	253.713	24205	1.49	0.671	0.879	1.0238
23	NCS1_KAN418-1_4.tif:0008-0902	1.059	368.812	0	1845	131.552	92.343	0.836	390.449	37250	1.522	0.657	0.91	1.57557
24	NCS1_KAN418-1_4.tif:0009-0968	0.891	213.765	0	1131	51.263	99.117	0.983	190.455	18170	1.031	0.97	0.944	0.768539
25	NCS1_KAN418-1_5.tif:0001-0028	0.891	211.447	0	792	55.015	2.87	0.818	188.39	17973	1.216	0.822	0.89	0.760206
26	NCS1_KAN418-1_5.tif:0002-0251	1.226	189.812	0	1242	104.03	25.714	0.901	232.781	22208	1.091	0.917	0.925	0.939335
27	NCS1_KAN418-1_5.tif:0003-0412	1.31	297.88	0	2321	131.782	42.143	0.749	390.292	37235	1.833	0.546	0.85	1.57493
28	NCS1_KAN418-1_5.tif:0004-0468	1.478	212.014	0	1234	9.92	47.937	0.824	313.345	29894	1.561	0.641	0.907	1.26443
29	NCS1_KAN418-1_5.tif:0005-0716	1.205	165.974	0	1344	46.267	73.244	0.726	200.067	19087	1.763	0.567	0.842	0.807325
30	NCS1_KAN418-1_5.tif:0006-0835	0.975	304.978	0	1445	85.852	85.51	0.956	297.297	28363	1.19	0.84	0.935	1.19967
31	NCS1_KAN418-1_5.tif:0007-0984	1.268	269.347	0	1261	120.147	100.699	0.895	341.614	32591	1.391	0.719	0.92	1.37851
32	NCS1_KAN418-1_6.tif:0001-0104	1.048	239.41	0	1433	85.58	10.665	0.749	250.946	23941	1.712	0.584	0.847	1.01264
33	NCS1_KAN418-1_6.tif:0002-0361	0.88	192.405	0	1315	34.067	36.953	0.906	169.408	16162	1.304	0.767	0.939	0.683606
34	NCS1_KAN418-1_6.tif:0003-0489	1.205	245.252	0	1314	137.952	50.101	0.804	295.63	28204	1.792	0.558	0.898	1.19295
35	NCS1_KAN418-1_6.tif:0004-0630	0.922	163.193	0	952	82.379	64.552	0.784	150.53	14361	1.455	0.687	0.871	0.607429
36	NCS1_KAN418-1_6.tif:0005-0811	1.017	215.216	0	780	110.935	83.003	0.747	218.819	20876	1.946	0.514	0.858	0.882995
37	NCS1_KAN418-1_6.tif:0006-0846	1.258	164.208	0	820	51.455	86.642	0.849	206.545	19705	1.743	0.574	0.949	0.833465
38	NCS1_KAN418-1_6.tif:0007-0934	1.205	197.948	0	1145	81.477	95.63	0.827	238.609	22764	1.531	0.653	0.895	0.962852
										23642.3				1
	RPE-BFP-Cas9 CEP89KO (pool)
39	NCS1_KAN418-2_1.tif:0001-0104	1.132	32.787	0	159	141.252	10.742	0.91	37.116	3541	1.303	0.768	0.911	0.149774
40	NCS1_KAN418-2_1.tif:0002-0235	0.849	18.568	0	91	101.401	24.096	0.936	15.765	1504	1.061	0.942	0.926	0.0636149
41	NCS1_KAN418-2_1.tif:0003-0313	0.87	16.723	0	77	105.02	32.112	0.895	14.549	1388	1.233	0.811	0.927	0.0587084
42	NCS1_KAN418-2_1.tif:0004-0618	0.891	33.318	0	158	84	63.276	0.935	29.685	2832	1.197	0.835	0.909	0.119785
43	NCS1_KAN418-2_1.tif:0005-0826	0.849	18.136	0	86	24.781	84.532	0.873	15.398	1469	1.199	0.834	0.915	0.0621345
44	NCS1_KAN418-2_1.tif:0006-0935	1.08	46.806	0	178	132.993	95.7	0.923	50.533	4821	1.189	0.841	0.896	0.203914
45	NCS1_KAN418-2_2.tif:0001-0254	0.901	29.791	0	148	90.324	26.06	0.946	26.855	2562	1.079	0.927	0.915	0.108365
46	NCS1_KAN418-2_2.tif:0002-0296	0.849	8.481	0	49	116.381	30.273	0.936	7.201	687	1.144	0.874	0.92	0.0290581
47	NCS1_KAN418-2_2.tif:0003-0711	0.839	23.3	0	121	15.676	72.812	0.893	19.538	1864	1.472	0.679	0.93	0.0788419
48	NCS1_KAN418-2_2.tif:0004-0881	1.08	28.35	0	189	87.155	90.222	0.935	30.607	2920	1.137	0.879	0.92	0.123508
49	NCS1_KAN418-2_3.tif:0001-0278	1.038	27.172	0	131	96.837	28.476	0.823	28.196	2690	1.475	0.678	0.868	0.113779
50	NCS1_KAN418-2_3.tif:0002-0418	0.933	18.461	0	64	25.706	42.834	0.915	17.222	1643	1.382	0.723	0.927	0.0694942
51	NCS1_KAN418-2_3.tif:0003-0480	0.849	21.827	0	90	134.802	49.205	0.904	18.532	1768	1.307	0.765	0.92	0.0747813
52	NCS1_KAN418-2_3.tif:0004-0735	0.88	10.131	0	65	59.125	75.21	0.88	8.92	851	1.339	0.747	0.87	0.0359949
53	NCS1_KAN418-2_3.tif:0005-0918	1.048	26.02	0	143	17.625	93.939	0.827	27.274	2602	1.635	0.612	0.901	0.110057
54	NCS1_KAN418-2_4.tif:0001-0025	0.943	27.7	0	102	117.831	2.644	0.99	26.131	2493	1.109	0.902	0.938	0.105447
55	NCS1_KAN418-2_4.tif:0002-0536	0.996	22.726	0	88	85.841	54.863	0.944	22.63	2159	1.161	0.861	0.936	0.0913195
56	NCS1_KAN418-2_4.tif:0003-0871	1.027	33.082	0	147	123.121	89.241	0.993	33.982	3242	1.043	0.959	0.929	0.137127
57	NCS1_KAN418-2_4.tif:0004-1033	0.86	27.122	0	97	120.029	105.757	0.872	23.312	2224	1.599	0.625	0.916	0.0940688
58	NCS1_KAN418-2_5.tif:0001-0537	0.849	17.012	0	68	30.717	54.945	0.861	14.444	1378	1.376	0.727	0.88	0.0582855
59	NCS1_KAN418-2_5.tif:0002-0916	0.964	28.402	0	157	57.42	93.857	0.82	27.389	2613	1.703	0.587	0.92	0.110522
60	NCS1_KAN418-2_5.tif:0003-1002	0.891	29.553	0	150	137.557	102.663	0.873	26.33	2512	1.465	0.683	0.919	0.10625
61	NCS1_KAN418-2_6.tif:0001-0193	0.901	13.616	0	83	27.463	19.806	0.827	12.274	1171	1.806	0.554	0.93	0.0495299
62	NCS1_KAN418-2_6.tif:0002-0311	0.839	32.2	0	112	103.062	31.83	0.973	27.001	2576	1.1	0.909	0.952	0.108957
63	NCS1_KAN418-2_6.tif:0003-0629	0.943	27.167	0	116	53.105	64.441	0.912	25.628	2445	1.205	0.83	0.9	0.103416
64	NCS1_KAN418-2_6.tif:0004-0726	0.933	52.843	0	235	118.485	74.341	0.993	49.296	4703	1.061	0.943	0.962	0.198923
65	NCS1_KAN418-2_6.tif:0005-0740	0.943	17.022	0	155	141.063	75.777	0.943	16.058	1532	1.225	0.816	0.909	0.0647992
66	NCS1_KAN418-2_6.tif:0006-0894	1.08	14.67	0	88	103.257	91.594	0.878	15.838	1511	1.317	0.759	0.912	0.063911
										2275.04				0.0962275
	RPE-BFP-Cas9 NCS1KO (pool)
67	NCS1_KAN418-3_1.tif:0001-0061	0.839	3.087	0	17	75.658	6.28	0.875	2.589	247	1.26	0.793	0.947	0.0104474
68	NCS1_KAN418-3_1.tif:0002-0802	0.975	2.968	0	26	34.242	82.099	0.855	2.893	276	1.455	0.687	0.921	0.011674
69	NCS1_KAN418-3_1.tif:0003-0943	0.901	4.756	0	24	76.567	96.593	0.855	4.287	409	1.369	0.73	0.905	0.0172995
70	NCS1_KAN418-3_2.tif:0001-0179	0.891	3.953	0	50	140.937	18.33	0.935	3.522	336	1.213	0.824	0.899	0.0142118
71	NCS1_KAN418-3_2.tif:0002-0410	0.86	2.976	0	16	130.244	42.006	0.902	2.558	244	1.226	0.816	0.891	0.0103205
72	NCS1_KAN418-3_2.tif:0003-0695	0.912	7.828	0	65	51.492	71.198	0.853	7.138	681	1.26	0.794	0.879	0.0288043
73	NCS1_KAN418-3_3.tif:0001-0192	0.87	4.687	0	23	117.529	19.661	0.995	4.077	389	1.023	0.978	0.927	0.0164536
74	NCS1_KAN418-3_3.tif:0002-0514	0.839	4.55	0	33	103.446	52.667	0.925	3.815	364	1.256	0.796	0.904	0.0153962
75	NCS1_KAN418-3_3.tif:0003-0555	0.954	3.527	0	25	74.148	56.817	0.892	3.365	321	1.421	0.704	0.905	0.0135774
76	NCS1_KAN418-3_3.tif:0004-0685	1.027	6.306	0	52	123.915	70.145	0.93	6.478	618	1.153	0.867	0.929	0.0261396
77	NCS1_KAN418-3_3.tif:0005-0924	0.933	2.719	0	16	85.325	94.593	0.915	2.537	242	1.239	0.807	0.922	0.0102359
78	NCS1_KAN418-3_4.tif:0001-0489	0.943	2.4	0	11	126.049	50.123	0.792	2.264	216	1.583	0.632	0.87	0.00913618
79	NCS1_KAN418-3_4.tif:0002-0879	0.849	3.457	0	17	67.227	89.969	0.95	2.935	280	1.115	0.897	0.959	0.0118432
80	NCS1_KAN418-3_5.tif:0001-0341	1.132	3.546	0	22	116.532	34.938	0.867	4.015	383	1.33	0.752	0.923	0.0161998
81	NCS1_KAN418-3_5.tif:0002-0616	0.901	2.826	0	14	98.654	63.104	0.827	2.547	243	2.013	0.497	0.956	0.0102782
82	NCS1_KAN418-3_5.tif:0003-0745	0.88	2.107	0	16	50.982	76.304	0.797	1.855	177	1.621	0.617	0.862	0.00748659
83	NCS1_KAN418-3_5.tif:0004-0855	0.87	2.771	0	12	117.47	87.524	0.788	2.411	230	1.875	0.533	0.892	0.00972834
84	NCS1_KAN418-3_6.tif:0001-0060	0.912	2.414	0	13	77.45	6.14	0.894	2.201	210	1.261	0.793	0.916	0.0088824
85	NCS1_KAN418-3_6.tif:0002-0625	0.996	3.316	0	27	130.635	64.012	0.996	3.302	315	1.222	0.818	0.941	0.0133236
86	NCS1_KAN418-3_6.tif:0003-0701	0.86	5.512	0	25	86.436	71.787	1	4.738	452	1.162	0.86	0.916	0.0191183
87	NCS1_KAN418-3_6.tif:0004-0837	0.901	2.64	0	11	103.183	85.67	0.96	2.379	227	1.064	0.94	0.94	0.00960145
88	NCS1_KAN418-3_6.tif:0005-0989	0.954	7.11	0	52	62.086	101.245	0.905	6.782	647	1.328	0.753	0.933	0.0273662
										513.001				0.0216985
	RPE-BFP-Cas9 C3orf14KO (pool)
89	NCS1_KAN418-4_1.tif:0001-0031	1.09	41.019	0	317	140.731	3.187	0.944	44.716	4266	1.297	0.771	0.933	0.18044
90	NCS1_KAN418-4_1.tif:0002-0032	1.143	150.899	0	911	61.012	3.285	0.875	172.406	16448	1.258	0.795	0.924	0.695703
91	NCS1_KAN418-4_1.tif:0003-0031	1.373	349.13	0	1760	120.929	3.191	0.916	479.398	45736	1.254	0.798	0.942	1.9345
92	NCS1_KAN418-4_1.tif:0004-0144	1.038	134.515	0	794	100.26	14.738	0.984	139.587	13317	1.155	0.866	0.961	0.563271
93	NCS1_KAN418-4_1.tif:0005-0345	0.922	263.125	0	1536	97.58	35.306	0.935	242.707	23155	1.171	0.854	0.921	0.97939
94	NCS1_KAN418-4_1.tif:0006-0358	1.614	250.649	0	1606	135.838	36.672	0.881	404.6	38600	1.612	0.62	0.925	1.63267
95	NCS1_KAN418-4_1.tif:0007-0400	0.849	130.975	0	883	20.809	41.004	0.971	111.202	10609	1.259	0.794	0.926	0.44873
96	NCS1_KAN418-4_1.tif:0008-0550	1.184	192.761	0	1350	131.325	56.295	0.79	228.316	21782	1.72	0.581	0.886	0.921316
97	NCS1_KAN418-4_1.tif:0009-0573	0.912	203.046	0	1068	89.36	58.691	0.837	185.162	17665	1.585	0.631	0.916	0.747179
98	NCS1_KAN418-4_1.tif:0010-0691	0.839	167.637	0	734	115.87	70.771	0.906	140.572	13411	1.431	0.699	0.958	0.567247
99	NCS1_KAN418-4_1.tif:0011-0809	1.163	234.216	0	1331	65.836	82.84	0.935	272.507	25998	1.357	0.737	0.91	1.09964
100	NCS1_KAN418-4_2.tif:0001-0064	1.08	153.078	0	811	105.268	6.577	0.842	165.267	15767	1.227	0.815	0.873	0.666899
101	NCS1_KAN418-4_2.tif:0002-0300	0.912	139.874	0	815	33.487	30.747	0.938	127.554	12169	1.017	0.983	0.946	0.514714
102	NCS1_KAN418-4_2.tif:0003-0341	1.059	141.812	0	781	103.915	34.984	0.9	150.132	14323	1.529	0.654	0.944	0.605822
103	NCS1_KAN418-4_2.tif:0004-0446	1.153	290.709	0	1811	70.836	45.708	0.899	335.189	31978	1.288	0.777	0.905	1.35258
104	NCS1_KAN418-4_2.tif:0005-0457	1.069	237.118	0	1155	115.336	46.852	0.955	253.514	24186	1.131	0.884	0.932	1.023
105	NCS1_KAN418-4_2.tif:0006-0720	1.163	137.468	0	755	26.383	73.711	0.881	159.943	15259	1.122	0.892	0.906	0.645412
106	NCS1_KAN418-4_2.tif:0007-0745	0.996	200.989	0	1236	101.018	76.265	0.857	200.141	19094	1.428	0.7	0.941	0.807621
107	NCS1_KAN418-4_2.tif:0008-0954	0.901	180.186	0	757	80.319	97.702	0.96	162.427	15496	1.261	0.793	0.94	0.655436
108	NCS1_KAN418-4_3.tif:0001-0108	1.017	197.237	0	959	50.299	11.084	0.849	200.539	19132	1.432	0.698	0.946	0.809229
109	NCS1_KAN418-4_3.tif:0002-0216	1.31	292.296	0	2055	98.546	22.077	0.899	382.976	36537	1.174	0.852	0.919	1.54541
110	NCS1_KAN418-4_3.tif:0003-0270	1.006	285.49	0	1594	115.782	27.641	0.883	287.276	27407	1.211	0.826	0.928	1.15924
111	NCS1_KAN418-4_3.tif:0004-0703	0.901	137.988	0	828	0.701	72.061	0.791	124.388	11867	1.551	0.645	0.869	0.50194
112	NCS1_KAN418-4_3.tif:0005-0825	1.153	193.636	0	1067	110.881	84.394	0.873	223.264	21300	1.455	0.687	0.936	0.900929
113	NCS1_KAN418-4_3.tif:0006-0827	0.943	190.656	0	1177	70.6	84.727	0.827	179.858	17159	1.608	0.622	0.887	0.725777
114	NCS1_KAN418-4_3.tif:0007-0862	1.059	132.396	0	930	43.336	88.326	0.888	140.163	13372	1.418	0.705	0.918	0.565597
115	NCS1_KAN418-4_4.tif:0001-0239	0.922	192.011	0	1201	31.192	24.473	0.875	177.112	16897	1.337	0.748	0.907	0.714695
116	NCS1_KAN418-4_4.tif:0002-0284	0.901	176.849	0	994	47.02	29.06	0.946	159.419	15209	1.253	0.798	0.92	0.643297
117	NCS1_KAN418-4_4.tif:0003-0390	1.184	275.416	0	1548	133.859	39.929	0.908	326.216	31122	1.17	0.854	0.934	1.31637
118	NCS1_KAN418-4_4.tif:0004-0628	0.849	170.84	0	850	69.675	64.362	0.861	145.048	13838	1.545	0.647	0.89	0.585308
119	NCS1_KAN418-4_4.tif:0005-0700	0.933	212.438	0	1365	15.788	71.711	0.946	198.181	18907	1.186	0.843	0.927	0.799712
120	NCS1_KAN418-4_4.tif:0006-0791	1.08	211.621	0	1468	117.168	81.008	0.918	228.473	21797	1.483	0.675	0.954	0.921951
121	NCS1_KAN418-4_4.tif:0007-0801	0.849	222.457	0	766	32.069	82	0.971	188.873	18019	1.049	0.953	0.931	0.762152
122	NCS1_KAN418-4_4.tif:0008-0837	1.069	163.186	0	1076	62.295	85.756	0.938	174.471	16645	1.215	0.823	0.936	0.704036
123	NCS1_KAN418-4_5.tif:0001-0165	0.87	454.41	0	2300	136.214	16.895	0.98	395.334	37716	1.111	0.9	0.907	1.59528
124	NCS1_KAN418-4_5.tif:0002-0178	0.964	200.087	0	1173	97.306	18.266	0.82	192.95	18408	1.818	0.55	0.92	0.778606
125	NCS1_KAN418-4_5.tif:0003-0226	0.933	95.685	0	427	113.102	23.169	0.979	89.264	8516	1.181	0.847	0.927	0.360202
126	NCS1_KAN418-4_5.tif:0004-0429	1.122	341.757	0	2169	121.574	43.931	0.941	383.301	36568	1.188	0.842	0.922	1.54672
127	NCS1_KAN418-4_5.tif:0005-0457	0.996	188.432	0	1160	31.518	46.867	0.836	187.636	17901	1.288	0.777	0.864	0.757161
128	NCS1_KAN418-4_5.tif:0006-0513	1.132	287.463	0	1642	138.429	52.501	0.883	325.42	31046	1.412	0.708	0.911	1.31316
129	NCS1_KAN418-4_5.tif:0007-0545	0.933	165.427	0	844	73.382	55.781	0.868	154.324	14723	1.544	0.648	0.967	0.622741
130	NCS1_KAN418-4_5.tif:0008-0891	0.985	181.5	0	1008	101.566	91.301	0.864	178.831	17061	1.663	0.601	0.94	0.721631
131	NCS1_KAN418-4_5.tif:0009-0912	0.985	167.319	0	945	46.869	93.429	0.953	164.859	15728	1.302	0.768	0.913	0.665249
132	NCS1_KAN418-4_6.tif:0001-0113	0.964	186.196	0	1023	75.218	11.626	0.846	179.554	17130	1.76	0.568	0.92	0.72455
133	NCS1_KAN418-4_6.tif:0002-0188	1.153	336.064	0	1792	112.642	19.276	0.883	387.483	36967	1.398	0.715	0.924	1.5636
134	NCS1_KAN418-4_6.tif:0003-0335	1.153	225.764	0	1568	114.677	34.351	0.967	260.306	24834	1.13	0.885	0.94	1.05041
135	NCS1_KAN418-4_6.tif:0004-0439	1.08	150.078	0	858	14.503	44.979	0.784	162.029	15458	1.669	0.599	0.869	0.653829
136	NCS1_KAN418-4_6.tif:0005-0473	1.216	174.241	0	979	98.915	48.484	0.858	211.859	20212	1.499	0.667	0.903	0.85491
137	NCS1_KAN418-4_6.tif:0006-0665	1.09	229.885	0	1196	110.699	68.088	0.915	250.6	23908	1.218	0.821	0.92	1.01124
138	NCS1_KAN418-4_6.tif:0007-0685	1.247	157.773	0	903	90.537	70.124	0.87	196.797	18775	1.567	0.638	0.902	0.794129
139	NCS1_KAN418-4_6.tif:0008-0824	1.153	222.391	0	1568	60.502	84.289	0.823	256.418	24463	1.36	0.736	0.898	1.03471
140	NCS1_KAN418-4_6.tif:0009-0884	0.88	193.702	0	1089	34.341	90.452	0.748	170.55	16271	1.5	0.667	0.853	0.688217
141	NCS1_KAN418-4_6.tif:0010-0904	1.258	223.175	0	1594	123.085	92.509	0.817	280.715	26781	1.544	0.647	0.92	1.13276
142	NCS1_KAN418-4_6.tif:0011-0941	0.922	102.511	0	282	92.146	96.31	0.904	94.557	9021	1.4	0.714	0.936	0.381562
										20554.7				0.869405
	RPE-BFP-Cas9 CEP89KO (pool)	empty
143	NCS1_KAN418-5_1.tif:0001-0242	0.849	42.765	0	214	140.671	24.765	0.873	36.309	3464	1.452	0.689	0.931	0.146517
144	NCS1_KAN418-5_1.tif:0002-0505	0.839	31.825	0	101	121.952	51.734	0.893	26.687	2546	1.117	0.895	0.909	0.107689
145	NCS1_KAN418-5_1.tif:0003-0570	0.901	24.163	0	98	24.826	58.319	0.946	21.781	2078	1.181	0.847	0.915	0.0878934
146	NCS1_KAN418-5_1.tif:0004-0746	0.88	31.214	0	162	41.663	76.429	0.893	27.483	2622	1.384	0.722	0.908	0.110903
147	NCS1_KAN418-5_1.tif:0005-0810	0.996	30	0	135	89.85	82.929	0.873	29.873	2850	1.254	0.797	0.905	0.120547
148	NCS1_KAN418-5_1.tif:0006-0904	0.849	25.802	0	133	65.791	92.601	0.936	21.907	2090	1.218	0.821	0.92	0.088401
149	NCS1_KAN418-5_2.tif:0001-0110	0.901	20.116	0	81	139.442	11.26	0.884	18.134	1730	1.152	0.868	0.91	0.073174
150	NCS1_KAN418-5_2.tif:0002-0154	0.943	20.033	0	81	85.16	15.797	0.943	18.899	1803	1.226	0.816	0.914	0.0762617
151	NCS1_KAN418-5_2.tif:0003-0395	0.891	33.612	0	155	136.743	40.433	0.949	29.947	2857	1.488	0.672	0.955	0.120843
152	NCS1_KAN418-5_2.tif:0004-0740	0.985	12.457	0	75	51.38	75.798	0.892	12.274	1171	1.293	0.773	0.917	0.0495299
153	NCS1_KAN418-5_2.tif:0005-0752	0.985	22.798	0	89	133.566	77	0.922	22.463	2143	1.199	0.834	0.908	0.0906428
154	NCS1_KAN418-5_2.tif:0006-0936	0.87	4.867	0	44	127.819	95.892	0.926	4.235	404	1.215	0.823	0.922	0.017088
155	NCS1_KAN418-5_3.tif:0001-0049	0.954	12.626	0	71	34.079	5.008	0.967	12.044	1149	1.205	0.83	0.943	0.0485994
156	NCS1_KAN418-5_3.tif:0002-0364	1.163	24.36	0	117	140.645	37.333	0.845	28.343	2704	1.323	0.756	0.895	0.114371
157	NCS1_KAN418-5_3.tif:0003-0422	1.027	13.724	0	123	7.101	43.246	0.862	14.098	1345	1.357	0.737	0.895	0.0568896
158	NCS1_KAN418-5_3.tif:0004-0544	1.038	18.778	0	109	43.108	55.731	0.898	19.486	1859	1.514	0.66	0.912	0.0786304
159	NCS1_KAN418-5_3.tif:0005-0904	0.891	13.518	0	57	71.453	92.512	0.903	12.044	1149	1.472	0.679	0.939	0.0485994
160	NCS1_KAN418-5_5.tif:0001-0561	0.849	15.494	0	65	113.01	57.478	0.971	13.155	1255	1.194	0.838	0.936	0.0530829
161	NCS1_KAN418-5_6.tif:0001-0262	1.08	41.563	0	161	120.375	26.883	0.923	44.873	4281	1.207	0.829	0.904	0.181074
162	NCS1_KAN418-5_6.tif:0002-0620	0.985	31.404	0	76	103.669	63.531	0.892	30.942	2952	1.436	0.696	0.913	0.124861
163	NCS1_KAN418-5_6.tif:0003-0927	0.912	17.931	0	82	70.297	94.917	0.865	16.352	1560	1.638	0.61	0.926	0.0659835
										2095.81				0.0886467
	RPE-BFP-Cas9 CEP89KO (pool)	nontagCEP89
164	NCS1_KAN418-6_1.tif:0001-0141	1.006	258.635	0	1342	115.247	14.527	0.941	260.254	24829	1.168	0.856	0.923	1.0502
165	NCS1_KAN418-6_1.tif:0002-0335	1.195	150.368	0	1046	26.672	34.311	0.843	179.68	17142	1.129	0.886	0.874	0.725057
166	NCS1_KAN418-6_1.tif:0003-0736	0.912	161.816	0	849	64.712	75.34	0.894	147.564	14078	1.187	0.843	0.921	0.595459
167	NCS1_KAN418-6_1.tif:0004-0889	1.258	179.7	0	838	34.089	91.029	0.863	226.031	21564	1.567	0.638	0.92	0.912095
168	NCS1_KAN418-6_1.tif:0005-0971	0.88	146.631	0	803	4.651	99.435	0.863	129.105	12317	1.246	0.803	0.894	0.520974
169	NCS1_KAN418-6_2.tif:0001-0097	0.912	228.011	0	1294	36.428	9.903	0.894	207.929	19837	1.396	0.716	0.916	0.839048
170	NCS1_KAN418-6_2.tif:0002-0324	0.954	234.846	0	1171	110.387	33.151	0.981	224.008	21371	1.109	0.901	0.968	0.903932
171	NCS1_KAN418-6_2.tif:0003-0504	1.163	160.676	0	1026	9.952	51.594	0.935	186.944	17835	1.101	0.908	0.902	0.754369
172	NCS1_KAN418-6_2.tif:0004-0638	0.849	229.025	0	892	91.307	65.339	1	194.449	18551	1.209	0.827	0.931	0.784654
173	NCS1_KAN418-6_2.tif:0005-0931	0.922	178.773	0	794	30.857	95.332	0.904	164.901	15732	1.376	0.727	0.917	0.665419
174	NCS1_KAN418-6_2.tif:0006-0937	0.839	131.275	0	501	109.938	95.908	0.925	110.08	10502	1.331	0.751	0.914	0.444205
175	NCS1_KAN418-6_3.tif:0001-0048	0.922	20.091	0	179	80.243	4.896	0.922	18.532	1768	1.238	0.808	0.903	0.0747813
176	NCS1_KAN418-6_3.tif:0002-0309	0.849	171.185	0	1126	30.471	31.672	0.891	145.341	13866	1.333	0.75	0.9	0.586492
177	NCS1_KAN418-6_3.tif:0003-0509	0.996	131.863	0	744	115.555	52.116	0.741	131.306	12527	1.863	0.537	0.864	0.529856
178	NCS1_KAN418-6_3.tif:0004-0769	1.101	141.495	0	578	137.536	78.739	0.984	155.729	14857	1.397	0.716	0.938	0.628409
179	NCS1_KAN418-6_3.tif:0005-0921	0.922	238.068	0	1290	105.244	94.267	0.935	219.595	20950	1.349	0.741	0.931	0.886125
180	NCS1_KAN418-6_4.tif:0001-0078	1.122	215.121	0	1434	130.744	8.051	0.885	241.271	23018	1.398	0.715	0.926	0.973595
181	NCS1_KAN418-6_4.tif:0002-0145	1.059	123.772	0	758	61.028	14.921	0.747	131.034	12501	1.817	0.55	0.852	0.528756
182	NCS1_KAN418-6_4.tif:0003-0339	1.321	162.825	0	1112	122.726	34.724	0.858	215.046	20516	1.542	0.648	0.92	0.867768
183	NCS1_KAN418-6_4.tif:0004-0428	1.237	178.449	0	1380	18.503	43.841	0.725	220.717	21057	2.126	0.47	0.877	0.890651
184	NCS1_KAN418-6_4.tif:0005-0520	0.996	176.295	0	1098	68.887	53.264	0.703	175.55	16748	1.998	0.501	0.795	0.708392
185	NCS1_KAN418-6_4.tif:0006-0839	0.933	112.618	0	683	96.885	85.883	0.927	105.06	10023	1.098	0.911	0.957	0.423944
186	NCS1_KAN418-6_4.tif:0007-0845	0.933	202.101	0	1337	77.673	86.527	0.915	188.537	17987	1.142	0.876	0.913	0.760799
187	NCS1_KAN418-6_4.tif:0008-0969	1.048	241.11	0	1439	118.612	99.294	0.88	252.728	24111	1.54	0.649	0.93	1.01983
188	NCS1_KAN418-6_5.tif:0001-0142	1.289	219.171	0	1448	111.15	14.504	0.806	282.57	26958	1.615	0.619	0.888	1.14025
189	NCS1_KAN418-6_5.tif:0002-0412	1.247	140.168	0	672	38.656	42.145	0.88	174.837	16680	1.192	0.839	0.898	0.705516
190	NCS1_KAN418-6_5.tif:0003-0751	0.891	138.341	0	640	53.559	76.978	0.818	123.256	11759	1.539	0.65	0.885	0.497372
191	NCS1_KAN418-6_5.tif:0004-0875	1.153	135.164	0	1133	130.672	89.678	0.721	155.844	14868	1.476	0.677	0.815	0.628874
192	NCS1_KAN418-6_6.tif:0001-0039	0.985	155.191	0	926	139.723	4.071	0.788	152.909	14588	1.186	0.843	0.895	0.617031
193	NCS1_KAN418-6_6.tif:0002-0060	0.849	104.679	0	751	36.682	6.218	0.805	88.876	8479	1.481	0.675	0.876	0.358637
194	NCS1_KAN418-6_6.tif:0003-0214	1.006	206.531	0	1215	101.766	21.899	0.844	207.824	19827	1.075	0.93	0.877	0.838625
195	NCS1_KAN418-6_6.tif:0004-0409	1.467	193.643	0	1648	128.229	41.927	0.726	284.163	27110	1.714	0.583	0.843	1.14668
196	NCS1_KAN418-6_6.tif:0005-0491	1.059	147.109	0	910	75.868	50.287	0.836	155.739	14858	1.368	0.731	0.894	0.628451
197	NCS1_KAN418-6_6.tif:0006-0564	0.985	189.702	0	1293	35.289	57.749	0.864	186.913	17832	1.222	0.818	0.913	0.754243
198	NCS1_KAN418-6_6.tif:0007-0733	1.111	123.368	0	830	8.169	75.11	0.803	137.071	13077	1.362	0.734	0.918	0.55312
199	NCS1_KAN418-6_6.tif:0008-0763	1.216	196.224	0	1725	106.581	78.213	0.802	238.588	22762	1.724	0.58	0.872	0.962767
										17013.5				0.719621
	RPE-BFP-Cas9 NCS1KO (pool)	empty
200	NCS1_KAN418-7_1.tif:0001-0452	0.839	3.163	0	16	98.883	46.281	0.959	2.652	253	1.092	0.916	0.909	0.0107012
201	NCS1_KAN418-7_1.tif:0002-0748	0.891	5.047	0	27	23.734	76.626	0.949	4.497	429	1.057	0.946	0.939	0.0181455
202	NCS1_KAN418-7_1.tif:0003-0801	0.849	3.889	0	33	56.22	82.042	0.904	3.302	315	1.284	0.779	0.92	0.0133236
203	NCS1_KAN418-7_1.tif:0004-0942	0.943	3.678	0	24	97.314	96.501	0.907	3.469	331	1.324	0.755	0.963	0.0140004
204	NCS1_KAN418-7_2.tif:0001-0093	0.849	3.21	0	12	99.569	9.501	0.956	2.725	260	1.227	0.815	0.895	0.0109973
205	NCS1_KAN418-7_2.tif:0002-0108	0.943	2.5	0	14	128.304	11.082	0.99	2.358	225	1.189	0.841	0.942	0.00951686
206	NCS1_KAN418-7_2.tif:0003-0314	0.912	3.345	0	12	121.268	32.18	0.943	3.05	291	1.269	0.788	0.897	0.0123085
207	NCS1_KAN418-7_2.tif:0004-0353	0.849	2.519	0	16	140.915	36.146	0.985	2.138	204	1.119	0.893	0.953	0.00862862
208	NCS1_KAN418-7_2.tif:0005-0530	0.86	3.659	0	24	13.527	54.278	0.948	3.145	300	1.145	0.873	0.927	0.0126891
209	NCS1_KAN418-7_2.tif:0006-0985	0.86	2.768	0	11	134.47	100.929	0.983	2.379	227	1.226	0.816	0.932	0.00960145
210	NCS1_KAN418-7_3.tif:0001-0313	1.184	4.584	0	31	121.114	32.074	0.94	5.43	518	1.288	0.776	0.911	0.0219099
211	NCS1_KAN418-7_3.tif:0002-0518	0.933	2.112	0	16	88.759	53.026	0.946	1.971	188	1.151	0.869	0.937	0.00795186
212	NCS1_KAN418-7_3.tif:0003-0607	0.922	3.659	0	21	117.227	62.191	0.892	3.375	322	1.653	0.605	0.907	0.0136197
213	NCS1_KAN418-7_3.tif:0004-0638	1.101	4.448	0	66	52.757	65.406	0.896	4.895	467	1.279	0.782	0.921	0.0197528
214	NCS1_KAN418-7_3.tif:0005-0775	0.985	3.043	0	14	133.82	79.354	0.966	2.998	286	1.135	0.881	0.954	0.012097
215	NCS1_KAN418-7_3.tif:0006-0818	1.038	3.838	0	14	74.733	83.811	0.91	3.983	380	1.088	0.919	0.93	0.0160729
216	NCS1_KAN418-7_4.tif:0001-0082	0.891	5.565	0	42	65.197	8.431	0.949	4.958	473	1.235	0.81	0.944	0.0200065
217	NCS1_KAN418-7_4.tif:0002-0426	0.901	5.477	0	32	83.998	43.633	0.914	4.937	471	1.252	0.799	0.901	0.019922
218	NCS1_KAN418-7_4.tif:0003-0524	0.975	2.129	0	12	110.671	53.678	0.988	2.075	198	1.101	0.908	0.944	0.00837483
219	NCS1_KAN418-7_4.tif:0004-0616	0.849	2.519	0	12	10.885	63.113	1	2.138	204	1.19	0.841	0.931	0.00862862
220	NCS1_KAN418-7_4.tif:0005-0747	0.954	11.538	0	79	136.579	76.53	0.935	11.006	1050	1.307	0.765	0.929	0.044412
221	NCS1_KAN418-7_4.tif:0006-0897	0.922	2.614	0	13	76.861	91.874	0.968	2.411	230	1.168	0.856	0.931	0.00972834
222	NCS1_KAN418-7_5.tif:0001-0567	0.901	2.802	0	13	126.677	58.012	0.914	2.526	241	1.33	0.752	0.925	0.0101936
223	NCS1_KAN418-7_5.tif:0002-0702	0.943	2.311	0	11	90.185	71.916	0.882	2.18	208	1.339	0.747	0.905	0.0087978
224	NCS1_KAN418-7_5.tif:0003-0762	0.985	2.798	0	12	127.045	78	0.922	2.757	263	1.493	0.67	0.922	0.0111241
225	NCS1_KAN418-7_5.tif:0004-0906	0.912	2.621	0	13	119.737	92.722	0.957	2.39	228	1.083	0.923	0.921	0.00964375
226	NCS1_KAN418-7_6.tif:0001-0242	1.143	6.752	0	54	120.304	24.822	0.806	7.715	736	1.532	0.653	0.893	0.0311307
227	NCS1_KAN418-7_6.tif:0002-0858	0.901	8.116	0	61	128.681	87.814	0.96	7.316	698	1.072	0.933	0.94	0.0295234
										357				0.0151001
	RPE-BFP-Cas9 NCS1KO (pool)	nontag NCS1
228	NCS1_KAN418-8_1.tif:0001-0031	1.006	335.833	0	1727	132.96	3.312	0.794	337.935	32240	1.395	0.717	0.865	1.36366
229	NCS1_KAN418-8_1.tif:0002-0140	0.849	269.951	0	1043	82.229	14.406	0.844	229.196	21866	1.986	0.504	0.947	0.924869
230	NCS1_KAN418-8_1.tif:0003-0183	1.069	171.333	0	892	105.406	18.791	0.786	183.181	17476	1.69	0.592	0.861	0.739185
231	NCS1_KAN418-8_1.tif:0004-0284	1.163	121.748	0	971	28.457	29.084	0.812	141.652	13514	1.736	0.576	0.881	0.571603
232	NCS1_KAN418-8_1.tif:0005-0434	1.006	173.917	0	864	12.089	44.421	0.883	175.005	16696	1.404	0.712	0.919	0.706193
233	NCS1_KAN418-8_1.tif:0006-0654	0.86	22.976	0	116	135.815	67.041	0.915	19.748	1884	1.261	0.793	0.916	0.0796878
234	NCS1_KAN418-8_1.tif:0007-0759	0.87	53.723	0	275	70.779	77.681	0.946	46.739	4459	1.287	0.777	0.897	0.188603
235	NCS1_KAN418-8_1.tif:0008-0815	0.901	224.756	0	810	100.186	83.446	0.884	202.604	19329	1.476	0.678	0.915	0.817561
236	NCS1_KAN418-8_2.tif:0001-0026	1.017	143.67	0	879	57.199	2.621	0.951	146.075	13936	1.213	0.825	0.928	0.589453
237	NCS1_KAN418-8_2.tif:0002-0100	1.08	191.398	0	1299	115.83	10.226	0.935	206.639	19714	1.481	0.675	0.92	0.833846
238	NCS1_KAN418-8_2.tif:0003-0167	1.205	147.652	0	1045	32.719	17.075	0.876	177.982	16980	1.347	0.743	0.895	0.718205
239	NCS1_KAN418-8_2.tif:0004-0233	0.964	192.978	0	858	135.614	23.818	0.945	186.095	17754	1.132	0.883	0.944	0.750943
240	NCS1_KAN418-8_2.tif:0005-0278	1.195	280.456	0	1467	120.22	28.565	0.83	335.126	31972	1.259	0.794	0.898	1.35232
241	NCS1_KAN418-8_2.tif:0006-0457	1.352	196.984	0	1802	139.236	46.729	0.845	266.355	25411	1.349	0.742	0.921	1.07481
242	NCS1_KAN418-8_2.tif:0007-0504	1.268	198.909	0	1447	82.624	51.644	0.885	252.277	24068	1.367	0.731	0.903	1.01801
243	NCS1_KAN418-8_2.tif:0008-0579	1.216	236.931	0	1554	20.213	59.296	0.883	288.083	27484	1.483	0.674	0.913	1.16249
244	NCS1_KAN418-8_2.tif:0009-0634	1.153	193.373	0	1130	58.852	64.909	0.883	222.96	21271	1.388	0.72	0.932	0.899702
245	NCS1_KAN418-8_2.tif:0010-0761	0.88	173.333	0	805	71.52	78.006	0.937	152.616	14560	1.218	0.821	0.944	0.615846
246	NCS1_KAN418-8_2.tif:0011-0840	0.985	219.872	0	1357	58.395	86.023	0.966	216.639	20668	1.227	0.815	0.94	0.874197
247	NCS1_KAN418-8_2.tif:0012-0862	1.101	293.533	0	1574	128.398	88.25	0.858	323.061	30821	1.429	0.7	0.882	1.30364
248	NCS1_KAN418-8_3.tif:0001-0205	0.985	230.383	0	1210	25.872	21.013	0.746	226.995	21656	1.644	0.608	0.821	0.915987
249	NCS1_KAN418-8_3.tif:0002-0270	0.86	219.549	0	1216	105.555	27.705	0.897	188.705	18003	1.257	0.796	0.959	0.761475
250	NCS1_KAN418-8_3.tif:0003-0422	0.891	6.859	0	36	21.543	43.229	0.935	6.111	583	1.414	0.707	0.919	0.0246592
251	NCS1_KAN418-8_3.tif:0004-0605	1.143	200.734	0	1157	74.482	61.919	0.816	229.343	21880	1.747	0.572	0.916	0.925461
252	NCS1_KAN418-8_3.tif:0005-0768	1.174	201.598	0	1388	115.606	78.656	0.889	236.67	22579	1.061	0.943	0.903	0.955027
253	NCS1_KAN418-8_3.tif:0006-0857	1.237	213.966	0	1331	55.138	87.721	0.794	264.646	25248	1.761	0.568	0.881	1.06792
254	NCS1_KAN418-8_3.tif:0007-0953	1.153	188.064	0	1679	91.533	97.564	0.873	216.838	20687	1.038	0.964	0.891	0.875001
255	NCS1_KAN418-8_3.tif:0008-0964	0.839	4.7	0	19	1.944	98.654	0.893	3.941	376	1.511	0.662	0.92	0.0159037
256	NCS1_KAN418-8_4.tif:0001-0063	1.08	227.553	0	1296	118.035	6.566	0.878	245.674	23438	1.326	0.754	0.916	0.99136
257	NCS1_KAN418-8_4.tif:0002-0185	1.237	191.763	0	854	91.542	19.001	0.849	237.184	22628	1.579	0.633	0.911	0.9571
258	NCS1_KAN418-8_4.tif:0003-0209	0.933	142.236	0	867	49.367	21.46	0.885	132.69	12659	1.384	0.722	0.913	0.535439
259	NCS1_KAN418-8_4.tif:0004-0212	1.258	282.542	0	1860	132.826	21.708	0.786	355.387	33905	1.563	0.64	0.896	1.43408
260	NCS1_KAN418-8_4.tif:0005-0423	1.111	141.736	0	598	28.815	43.277	0.962	157.479	15024	1.217	0.822	0.93	0.635472
261	NCS1_KAN418-8_4.tif:0006-0530	1.132	249.25	0	1191	107.407	54.208	0.832	282.161	26919	1.631	0.613	0.915	1.1386
262	NCS1_KAN418-8_4.tif:0007-0623	1.143	223.092	0	1366	63.896	63.773	0.865	254.887	24317	1.672	0.598	0.912	1.02854
263	NCS1_KAN418-8_4.tif:0008-0652	1.258	200.117	0	1307	109.862	66.795	0.863	251.711	24014	1.269	0.788	0.899	1.01572
264	NCS1_KAN418-8_4.tif:0009-0847	1.101	157.59	0	845	78.797	86.746	0.984	173.443	16547	1.166	0.857	0.925	0.699891
265	NCS1_KAN418-8_4.tif:0010-0879	1.132	11.157	0	101	123.039	89.98	0.921	12.631	1205	1.213	0.824	0.931	0.050968
266	NCS1_KAN418-8_4.tif:0011-1022	1.143	261.734	0	1149	116.173	104.698	0.918	299.037	28529	1.352	0.739	0.905	1.20669
267	NCS1_KAN418-8_5.tif:0001-0383	0.849	3.889	0	32	24.941	39.226	0.923	3.302	315	1.208	0.828	0.89	0.0133236
268	NCS1_KAN418-8_5.tif:0002-0510	0.891	221.494	0	1340	67.402	52.249	0.845	197.342	18827	1.175	0.851	0.881	0.796328
269	NCS1_KAN418-8_5.tif:0003-0699	0.943	303.944	0	1506	55.985	71.614	0.895	286.731	27355	1.124	0.89	0.909	1.15704
270	NCS1_KAN418-8_5.tif:0004-0714	1.163	155.505	0	881	118.326	73.146	0.907	180.927	17261	1.384	0.722	0.917	0.730091
271	NCS1_KAN418-8_5.tif:0005-0715	0.88	23.774	0	103	18.459	73.195	0.957	20.932	1997	1.09	0.917	0.908	0.0844674
272	NCS1_KAN418-8_5.tif:0006-0814	0.996	110.558	0	836	125.455	83.375	0.846	110.091	10503	1.703	0.587	0.936	0.444247
273	NCS1_KAN418-8_5.tif:0007-0992	1.31	121.904	0	967	76.005	101.571	0.76	159.723	15238	1.926	0.519	0.845	0.644524
274	NCS1_KAN418-8_5.tif:0008-0995	0.943	194.444	0	1063	97.719	101.915	0.925	183.433	17500	1.154	0.866	0.918	0.7402
275	NCS1_KAN418-8_6.tif:0001-0166	1.059	257.188	0	1460	135.075	16.964	0.946	272.277	25976	1.333	0.75	0.918	1.09871
276	NCS1_KAN418-8_6.tif:0002-0252	0.87	404.687	0	1656	103.326	25.988	0.695	352.075	33589	1.561	0.641	0.843	1.42072
277	NCS1_KAN418-8_6.tif:0003-0330	1.31	266.248	0	1854	28.134	33.795	0.874	348.847	33281	1.496	0.669	0.929	1.40769
278	NCS1_KAN418-8_6.tif:0004-0380	0.87	236.422	0	1169	1.65	38.928	0.895	205.686	19623	1.438	0.696	0.933	0.829997
279	NCS1_KAN418-8_6.tif:0005-0502	1.017	272.423	0	1416	40.759	51.392	0.813	276.983	26425	1.516	0.659	0.915	1.1177
280	NCS1_KAN418-8_6.tif:0006-0655	0.943	137.944	0	951	74.429	67.12	0.866	130.132	12415	1.43	0.699	0.928	0.525119
										19105.8				0.808119

## Sheet: IF condition
Exp. number	Cell line	Gene induced	Culture condition, fixation condition	rabbit-Alexa488	mouse IgG1-Alexa568	mouse IgG2b-Alexa647	Nuclear stain	Date	Replicate
KAN418-1	RPE-BFP-Cas9 pMCB306 (pool)		Fixed in 4% PFA, 24 hour serum starvation	NCS1, Cell Signaling, 8237P, 1:1000	CEP170, Invitrogen, 41-3200, 1:1000	Ac-Tub, 6B-11, SIGMA, 1:2000	DAPI	2018-12-11	No.1
KAN418-2	RPE-BFP-Cas9 CEP89KO (pool)		Fixed in 4% PFA, 24 hour serum starvation	NCS1, Cell Signaling, 8237P, 1:1000	CEP170, Invitrogen, 41-3200, 1:1000	Ac-Tub, 6B-11, SIGMA, 1:2000	DAPI	2018-12-11	No.1
KAN418-3	RPE-BFP-Cas9 NCS1KO (pool)		Fixed in 4% PFA, 24 hour serum starvation	NCS1, Cell Signaling, 8237P, 1:1000	CEP170, Invitrogen, 41-3200, 1:1000	Ac-Tub, 6B-11, SIGMA, 1:2000	DAPI	2018-12-11	No.1
KAN418-4	RPE-BFP-Cas9 C3orf14KO (pool)		Fixed in 4% PFA, 24 hour serum starvation	NCS1, Cell Signaling, 8237P, 1:1000	CEP170, Invitrogen, 41-3200, 1:1000	Ac-Tub, 6B-11, SIGMA, 1:2000	DAPI	2018-12-11	No.1
KAN418-5	RPE-BFP-Cas9 CEP89KO (pool)	empty	Fixed in 4% PFA, 24 hour serum starvation	NCS1, Cell Signaling, 8237P, 1:1000	CEP170, Invitrogen, 41-3200, 1:1000	Ac-Tub, 6B-11, SIGMA, 1:2000	DAPI	2018-12-11	No.1
KAN418-6	RPE-BFP-Cas9 CEP89KO (pool)	nontagCEP89	Fixed in 4% PFA, 24 hour serum starvation	NCS1, Cell Signaling, 8237P, 1:1000	CEP170, Invitrogen, 41-3200, 1:1000	Ac-Tub, 6B-11, SIGMA, 1:2000	DAPI	2018-12-11	No.1
KAN418-7	RPE-BFP-Cas9 NCS1KO (pool)	empty	Fixed in 4% PFA, 24 hour serum starvation	NCS1, Cell Signaling, 8237P, 1:1000	CEP170, Invitrogen, 41-3200, 1:1000	Ac-Tub, 6B-11, SIGMA, 1:2000	DAPI	2018-12-11	No.1
KAN418-8	RPE-BFP-Cas9 NCS1KO (pool)	nontag NCS1	Fixed in 4% PFA, 24 hour serum starvation	NCS1, Cell Signaling, 8237P, 1:1000	CEP170, Invitrogen, 41-3200, 1:1000	Ac-Tub, 6B-11, SIGMA, 1:2000	DAPI	2018-12-11	No.1

## Sheet: After ROUT
sgGFP	CEP89 KO	NCS1 KO	C3ORF14 KO	CEP89 KO + empty	CEP89 KO +CEP89-WT	NCS1 KO + empty	NCS1 KO + NCS1-WT
0.616819	0.149774	0.0104474	0.18044	0.146517	1.0502	0.0107012	1.36366
1.05269	0.0636149	0.011674	0.695703	0.107689	0.725057	0.0181455	0.924869
0.633526	0.0587084	0.0172995		0.0878934	0.595459	0.0133236	0.739185
0.799247	0.119785	0.0142118	0.563271	0.110903	0.912095	0.0140003	0.571603
0.758134	0.0621345	0.0103205	0.97939	0.120547	0.520974	0.0109973	0.706193
0.963402	0.203914	0.0288043	1.63267	0.088401	0.839048	0.00951686	0.0796878
0.784147	0.108365	0.0164536	0.44873	0.073174	0.903932	0.0123085	0.188603
0.68699	0.0290581	0.0153962	0.921316	0.0762617	0.754369	0.00862862	0.817561
0.91273	0.0788419	0.0135774	0.747179	0.120843	0.784654	0.0126891	0.589453
0.908373	0.123508	0.0261396	0.567247	0.04953	0.665419	0.00960145	0.833846
0.909811	0.113779	0.0102359	1.09964	0.0906428	0.444205	0.0219099	0.718205
1.08894	0.0694942	0.00913618	0.666899	0.017088	0.0747813	0.00795186	0.750943
1.6366	0.0747813	0.0118432	0.514714	0.0485994	0.586492	0.0136197	1.35232
0.95084	0.0359949	0.0161998	0.605822	0.114371	0.529856	0.0197528	1.07481
1.71062	0.110057	0.0102782	1.35258	0.0568896	0.628409	0.012097	1.01801
0.706404	0.105447	0.00748659	1.023	0.0786304	0.886125	0.0160729	1.16249
1.45637	0.0913195	0.00972834	0.645412	0.0485994	0.973595	0.0200065	0.899702
1.00769	0.137127	0.0088824	0.807621	0.0530829	0.528756	0.019922	0.615846
1.30664	0.0940688	0.0133236	0.655436	0.181074	0.867768	0.00837483	0.874197
0.957819	0.0582855	0.0191183	0.809229	0.124861	0.890651	0.00862862	1.30364
0.683945	0.110522	0.00960145	1.54541	0.0659835	0.708392		0.915987
1.0238	0.10625	0.0273663	1.15924		0.423944	0.00972834	0.761475
1.57557	0.04953		0.50194		0.760799	0.0101936	0.0246592
0.768539	0.108957		0.900929		1.01983	0.0087978	0.925461
0.760206	0.103416		0.725777		1.14025	0.0111241	0.955027
0.939335	0.198923		0.565597		0.705516	0.00964375	1.06792
1.57493	0.0647992		0.714695		0.497372		0.875001
1.26443	0.063911		0.643297		0.628874		0.0159037
0.807325			1.31637		0.617031		0.99136
1.19967			0.585308		0.358637		0.9571
1.37851			0.799712		0.838625		0.535439
1.01264			0.921951		1.14668		1.43408
0.683606			0.762152		0.628451		0.635472
1.19295			0.704036		0.754243		1.1386
0.607429			1.59528		0.55312		1.02854
0.882995			0.778606		0.962767		1.01572
0.833465			0.360202				0.699891
0.962852			1.54672				0.0509681
			0.757161				1.20669
			1.31316				0.0133236
			0.622741				0.796328
			0.721631				1.15704
			0.665249				0.730091
			0.72455				0.0844674
			1.5636				0.444247
			1.05041				0.644524
			0.653829				0.7402
			0.85491				1.09871
			1.01124				1.42072
			0.794129				1.40769
			1.03471				0.829997
			0.688217				1.1177
			1.13276				0.525119
			0.381562
