# Supplementary material for: Myristoylated Neuronal Calcium Sensor-1 captures the preciliary vesicle at distal appendages
Source: eLife. 2025 Jan 30;14:e85998. doi: 10.7554/eLife.85998 (PMC11984960; doi:10.7554/eLife.85998)
Supplement: Figure 2—figure supplement 2—source data 3. [file elife-85998-fig2-figsupp2-data3.xlsx]

## Sheet: Raw data
	Label	Area	Mean	Min	Max	X	Y	Circ	IntDen	RawIntDen	AR	Round	Solidity
1	GFP-C3orf14_KAN361-1_1.tif:0001-0081	0.566	24.056	0	188	26.119	8.338	0.933	13.616	1299	1.194	0.837	0.893	0.470843
2	GFP-C3orf14_KAN361-1_1.tif:0002-0117	0.66	116.46	0	410	71.75	12.043	0.928	76.905	7337	1.138	0.879	0.881	2.65941
3	GFP-C3orf14_KAN361-1_1.tif:0003-0192	0.472	37.333	0	125	136.655	19.713	0.792	17.61	1680	1.794	0.557	0.882	0.608942
4	GFP-C3orf14_KAN361-1_1.tif:0004-0232	0.713	54.721	0	218	124.045	23.725	0.864	39.003	3721	1.2	0.834	0.861	1.34873
5	GFP-C3orf14_KAN361-1_1.tif:0005-0368	0.65	41.452	0	159	69.114	37.701	0.877	26.938	2570	1.491	0.671	0.861	0.931537
6	GFP-C3orf14_KAN361-1_1.tif:0006-0389	0.702	30.761	0	136	94.553	39.757	0.833	21.603	2061	1.203	0.831	0.87	0.747042
7	GFP-C3orf14_KAN361-1_1.tif:0007-0441	0.587	25.304	0	160	127.148	45.185	0.967	14.853	1417	1.216	0.823	0.911	0.513614
8	GFP-C3orf14_KAN361-1_1.tif:0008-0504	0.66	68.73	0	240	59.757	51.531	0.825	45.386	4330	1.329	0.753	0.887	1.56948
9	GFP-C3orf14_KAN361-1_1.tif:0009-0583	0.608	29.862	0	135	105.299	59.699	0.92	18.155	1732	1.111	0.9	0.906	0.62779
10	GFP-C3orf14_KAN361-1_1.tif:0010-0613	0.472	76.156	13	225	20.564	62.738	0.907	35.921	3427	1.516	0.66	0.865	1.24217
11	GFP-C3orf14_KAN361-1_1.tif:0011-0849	0.535	15.804	0	83	52.864	87.041	0.829	8.448	806	1.532	0.653	0.836	0.292147
12	GFP-C3orf14_KAN361-1_1.tif:0012-0854	0.335	54.906	0	121	82.855	87.414	0.936	18.417	1757	1.323	0.756	0.877	0.636852
13	GFP-C3orf14_KAN361-1_2.tif:0001-0017	0.44	28.167	0	105	133.283	1.762	0.793	12.4	1183	1.537	0.65	0.808	0.428797
14	GFP-C3orf14_KAN361-1_2.tif:0002-0095	0.472	28.956	0	68	5.436	9.757	0.951	13.658	1303	1.109	0.902	0.874	0.472293
15	GFP-C3orf14_KAN361-1_2.tif:0003-0219	0.356	15.382	0	41	115.034	22.443	0.919	5.482	523	1.075	0.93	0.85	0.18957
16	GFP-C3orf14_KAN361-1_2.tif:0004-0238	0.566	20.778	0	73	52.662	24.333	0.842	11.761	1122	1.256	0.796	0.871	0.406686
17	GFP-C3orf14_KAN361-1_2.tif:0005-0274	0.472	519.889	120	1676	11.299	28.101	0.99	245.223	23395	1.096	0.912	0.957	8.47988
18	GFP-C3orf14_KAN361-1_2.tif:0006-0385	0.388	7.865	0	26	140.172	39.429	0.821	3.05	291	1.208	0.828	0.787	0.105477
19	GFP-C3orf14_KAN361-1_2.tif:0007-0433	0.587	66.339	0	243	21.403	44.41	0.911	38.94	3715	1.088	0.919	0.889	1.34656
20	GFP-C3orf14_KAN361-1_2.tif:0008-0590	0.451	35.767	0	134	100.604	60.385	0.927	16.121	1538	1.176	0.85	0.887	0.557472
21	GFP-C3orf14_KAN361-1_2.tif:0009-0600	0.597	96.14	0	304	54.703	61.505	0.868	57.441	5480	1.424	0.702	0.912	1.98631
22	GFP-C3orf14_KAN361-1_2.tif:0010-0683	0.587	81.089	0	283	104.107	69.901	0.927	47.598	4541	1.454	0.688	0.918	1.64596
23	GFP-C3orf14_KAN361-1_2.tif:0011-0770	0.367	5.171	0	24	25.608	78.806	0.897	1.897	181	1.441	0.694	0.875	0.0656063
24	GFP-C3orf14_KAN361-1_2.tif:0012-0868	0.587	42.268	0	175	72.647	88.865	0.873	24.811	2367	1.187	0.843	0.875	0.857956
25	GFP-C3orf14_KAN361-1_2.tif:0013-0965	0.514	87.816	0	216	124.193	98.845	0.885	45.103	4303	1.322	0.756	0.852	1.55969
26	GFP-C3orf14_KAN361-1_3.tif:0001-0016	0.744	74.465	0	424	127.967	1.558	0.72	55.418	5287	1.452	0.689	0.811	1.91636
27	GFP-C3orf14_KAN361-1_3.tif:0002-0088	0.681	210.277	121	429	91.674	9.021	0.92	143.266	13668	1.359	0.736	0.89	4.95418
28	GFP-C3orf14_KAN361-1_3.tif:0003-0205	0.388	92.973	0	220	91.978	20.995	0.74	36.058	3440	2.197	0.455	0.902	1.24688
29	GFP-C3orf14_KAN361-1_3.tif:0004-0263	0.608	29.69	0	83	36.488	26.965	0.854	18.05	1722	1.37	0.73	0.859	0.624166
30	GFP-C3orf14_KAN361-1_3.tif:0005-0283	0.514	72.816	0	245	127.073	29.008	0.811	37.399	3568	1.618	0.618	0.86	1.29328
31	GFP-C3orf14_KAN361-1_3.tif:0006-0301	0.629	8.367	0	45	54.451	30.893	0.786	5.262	502	1.92	0.521	0.87	0.181958
32	GFP-C3orf14_KAN361-1_3.tif:0007-0420	0.514	11.837	0	75	83.107	43.106	0.811	6.079	580	1.137	0.88	0.838	0.21023
33	GFP-C3orf14_KAN361-1_3.tif:0008-0570	0.702	8.075	0	32	111.836	58.442	0.898	5.671	541	1.257	0.796	0.876	0.196094
34	GFP-C3orf14_KAN361-1_3.tif:0009-0594	0.954	56.846	0	329	82.367	60.834	0.753	54.223	5173	1.924	0.52	0.854	1.87503
35	GFP-C3orf14_KAN361-1_3.tif:0010-0599	0.545	4.385	0	14	22.833	61.362	0.898	2.39	228	1.298	0.77	0.874	0.0826422
36	GFP-C3orf14_KAN361-1_3.tif:0011-0710	0.482	5.783	0	23	22.123	72.621	0.927	2.788	266	1.23	0.813	0.893	0.0964159
37	GFP-C3orf14_KAN361-1_3.tif:0012-0898	0.597	38.035	0	254	58.144	91.971	0.889	22.725	2168	1.08	0.926	0.87	0.785825
38	GFP-C3orf14_KAN361-1_3.tif:0013-0953	0.566	11	0	49	12.976	97.632	0.764	6.226	594	1.551	0.645	0.806	0.215305
39	GFP-C3orf14_KAN361-1_3.tif:0014-1009	0.577	8.436	0	48	117.08	103.277	0.858	4.864	464	1.399	0.715	0.866	0.168184
40	GFP-C3orf14_KAN361-1_4.tif:0001-0183	0.618	4.966	0	22	28.799	18.735	0.869	3.071	293	1.312	0.762	0.855	0.106202
41	GFP-C3orf14_KAN361-1_4.tif:0002-0207	0.776	52.486	0	254	55.071	21.154	0.726	40.712	3884	1.748	0.572	0.818	1.40782
42	GFP-C3orf14_KAN361-1_4.tif:0003-0217	0.524	80.74	0	234	5.555	22.256	0.827	42.315	4037	1.119	0.893	0.855	1.46327
43	GFP-C3orf14_KAN361-1_4.tif:0004-0242	0.493	90.574	5	266	103.619	24.845	0.687	44.621	4257	2.469	0.405	0.913	1.54302
44	GFP-C3orf14_KAN361-1_4.tif:0005-0412	0.482	33.63	0	149	126.957	42.172	0.927	16.215	1547	1.346	0.743	0.885	0.560734
45	GFP-C3orf14_KAN361-1_4.tif:0006-0465	0.514	57.286	0	189	88.749	47.627	0.901	29.423	2807	1.212	0.825	0.891	1.01744
46	GFP-C3orf14_KAN361-1_4.tif:0007-0634	0.451	31.07	0	175	51.194	64.935	0.909	14.004	1336	1.601	0.624	0.887	0.484254
47	GFP-C3orf14_KAN361-1_4.tif:0008-0674	0.43	8.439	0	69	21.554	69.021	0.826	3.627	346	1.042	0.96	0.812	0.125413
48	GFP-C3orf14_KAN361-1_4.tif:0009-0783	0.482	19.196	0	125	122.06	80.187	0.927	9.255	883	1.376	0.727	0.876	0.320057
49	GFP-C3orf14_KAN361-1_4.tif:0010-0798	0.524	78.08	0	238	107.367	81.743	0.827	40.921	3904	1.129	0.886	0.862	1.41507
50	GFP-C3orf14_KAN361-1_4.tif:0011-0810	0.597	11.772	0	63	57.483	82.982	0.735	7.033	671	1.105	0.905	0.792	0.243214
51	GFP-C3orf14_KAN361-1_4.tif:0012-0865	0.566	48.426	0	200	73.849	88.55	0.863	27.41	2615	1.128	0.887	0.831	0.947848
52	GFP-C3orf14_KAN361-1_4.tif:0013-0998	0.325	15.419	0	70	18.463	102.247	0.907	5.01	478	1.422	0.703	0.861	0.173259
53	GFP-C3orf14_KAN361-1_4.tif:0014-1004	0.419	21.25	0	63	43.555	102.87	1	8.91	850	1.036	0.965	0.92	0.308096
54	GFP-C3orf14_KAN361-1_5.tif:0001-0083	0.514	54.184	0	301	118.583	8.57	0.764	27.829	2655	1.587	0.63	0.79	0.962346
55	GFP-C3orf14_KAN361-1_5.tif:0002-0392	0.577	13.855	0	105	118.992	40.188	0.993	7.987	762	1.183	0.845	0.902	0.276199
56	GFP-C3orf14_KAN361-1_5.tif:0003-0459	0.524	1.9	0	10	81.374	47.009	0.88	0.996	95	1.347	0.742	0.885	0.0344342
57	GFP-C3orf14_KAN361-1_5.tif:0004-0550	0.482	15.391	0	61	6.512	56.325	0.927	7.421	708	1.282	0.78	0.876	0.256626
58	GFP-C3orf14_KAN361-1_5.tif:0005-0577	0.692	47.152	0	287	107.886	59.027	0.678	32.62	3112	1.776	0.563	0.805	1.12799
59	GFP-C3orf14_KAN361-1_5.tif:0006-0722	0.409	92.59	0	222	74.025	73.939	0.841	37.85	3611	1.377	0.726	0.886	1.30886
60	GFP-C3orf14_KAN361-1_6.tif:0001-0174	0.419	155.4	0	290	97.07	17.863	0.822	65.155	6216	1.714	0.584	0.889	2.25309
61	GFP-C3orf14_KAN361-1_6.tif:0002-0199	0.618	64.983	0	264	133.587	20.428	0.803	40.187	3834	1.719	0.582	0.843	1.38969
62	GFP-C3orf14_KAN361-1_6.tif:0003-0248	0.587	71.321	0	204	61.749	25.385	0.95	41.865	3994	1.105	0.905	0.896	1.44769
63	GFP-C3orf14_KAN361-1_6.tif:0004-0398	0.744	44.577	0	204	21.736	40.721	0.674	33.175	3165	2.372	0.422	0.85	1.1472
64	GFP-C3orf14_KAN361-1_6.tif:0005-0533	0.566	40.796	0	110	117.556	54.607	0.933	23.092	2203	1.645	0.608	0.9	0.798512
65	GFP-C3orf14_KAN361-1_6.tif:0006-0550	0.545	22.096	0	83	80.668	56.382	0.66	12.044	1149	2.249	0.445	0.765	0.416473
66	GFP-C3orf14_KAN361-1_6.tif:0007-0600	0.377	61.306	0	214	55.94	61.571	0.74	23.133	2207	1.668	0.6	0.818	0.799962
67	GFP-C3orf14_KAN361-1_6.tif:0008-0929	0.681	51.231	0	225	103.878	95.133	0.779	34.905	3330	1.624	0.616	0.844	1.20701
68	GFP-C3orf14_KAN361-1_6.tif:0009-0991	0.44	56.548	0	185	36.808	101.574	0.863	24.894	2375	1.332	0.751	0.894	0.860856
										2758.88				1
69	GFP-C3orf14_KAN361-2_1.tif:0001-0081	0.692	3	0	15	78.753	8.38	1	2.075	198	1.061	0.943	0.93	0.0717682
70	GFP-C3orf14_KAN361-2_1.tif:0002-0244	0.409	26.205	0	76	127.55	24.982	0.949	10.712	1022	1.53	0.654	0.918	0.37044
71	GFP-C3orf14_KAN361-2_1.tif:0003-0313	0.535	6.863	0	33	38.848	32.066	0.921	3.669	350	1.439	0.695	0.887	0.126863
72	GFP-C3orf14_KAN361-2_1.tif:0004-0402	0.472	6.6	0	28	82.959	41.156	0.925	3.113	297	1.18	0.847	0.928	0.107652
73	GFP-C3orf14_KAN361-2_1.tif:0005-0541	0.608	65.172	0	207	121.353	55.445	0.868	39.621	3780	1.249	0.801	0.866	1.37012
74	GFP-C3orf14_KAN361-2_1.tif:0006-0677	0.608	7.931	0	47	118.112	69.262	0.868	4.822	460	1.58	0.633	0.913	0.166734
75	GFP-C3orf14_KAN361-2_1.tif:0007-0694	0.577	14.418	0	65	29.946	71.061	0.933	8.312	793	1.097	0.911	0.88	0.287435
76	GFP-C3orf14_KAN361-2_1.tif:0008-0843	0.482	4.37	0	39	89.853	86.285	0.83	2.107	201	1.139	0.878	0.836	0.0728556
77	GFP-C3orf14_KAN361-2_1.tif:0009-0937	0.514	10.898	0	47	114.331	95.94	0.925	5.597	534	1.131	0.884	0.845	0.193557
78	GFP-C3orf14_KAN361-2_2.tif:0001-0079	0.597	9.368	0	46	96.514	8.075	0.927	5.597	534	1.165	0.858	0.864	0.193557
79	GFP-C3orf14_KAN361-2_2.tif:0002-0238	0.346	3.576	0	22	18.864	24.35	0.747	1.237	118	1.878	0.532	0.815	0.0427709
80	GFP-C3orf14_KAN361-2_2.tif:0003-0281	0.524	20.2	0	68	137.369	28.773	0.919	10.587	1010	1.44	0.694	0.909	0.36609
81	GFP-C3orf14_KAN361-2_2.tif:0004-0310	0.618	30.492	0	113	124.404	31.732	0.822	18.857	1799	1.905	0.525	0.843	0.652076
82	GFP-C3orf14_KAN361-2_2.tif:0005-0361	0.472	10.111	0	32	90.831	36.952	0.932	4.769	455	1.298	0.77	0.849	0.164922
83	GFP-C3orf14_KAN361-2_2.tif:0006-0385	0.335	255.719	143	451	130.721	39.5	0.755	85.773	8183	2.425	0.412	0.941	2.96606
84	GFP-C3orf14_KAN361-2_2.tif:0007-0449	0.639	10.23	0	73	58.405	45.967	0.951	6.541	624	1.138	0.879	0.91	0.226179
85	GFP-C3orf14_KAN361-2_2.tif:0008-0575	0.608	6.31	0	51	15.265	58.844	0.927	3.836	366	1.442	0.693	0.872	0.132662
86	GFP-C3orf14_KAN361-2_2.tif:0009-0582	0.356	17.471	0	55	91.595	59.592	0.919	6.226	594	1.324	0.755	0.84	0.215305
87	GFP-C3orf14_KAN361-2_2.tif:0010-0587	0.587	13.232	0	62	46.525	60.14	0.967	7.767	741	1.326	0.754	0.911	0.268587
88	GFP-C3orf14_KAN361-2_2.tif:0011-0591	0.419	10.775	0	32	116.607	60.51	0.973	4.518	431	1.416	0.706	0.92	0.156223
89	GFP-C3orf14_KAN361-2_2.tif:0012-0599	0.409	18.513	0	59	52.504	61.259	0.736	7.568	722	1.731	0.578	0.821	0.2617
90	GFP-C3orf14_KAN361-2_2.tif:0013-0842	0.577	5.618	0	27	116.373	86.237	0.993	3.239	309	1.175	0.851	0.917	0.112002
91	GFP-C3orf14_KAN361-2_3.tif:0001-0262	0.335	8.375	0	24	35.043	26.776	0.885	2.809	268	1.739	0.575	0.914	0.0971408
92	GFP-C3orf14_KAN361-2_3.tif:0002-0546	0.482	5.674	0	24	61.204	55.918	0.909	2.736	261	1.449	0.69	0.852	0.0946035
93	GFP-C3orf14_KAN361-2_3.tif:0003-0581	0.346	19.758	0	62	33.009	59.482	0.913	6.834	652	1.125	0.889	0.88	0.236328
94	GFP-C3orf14_KAN361-2_3.tif:0004-0608	0.346	4.697	0	21	78.885	62.24	0.965	1.625	155	1.485	0.674	0.904	0.0561822
95	GFP-C3orf14_KAN361-2_3.tif:0005-0664	0.356	2.353	0	12	98.683	67.975	0.871	0.839	80	1.48	0.675	0.84	0.0289972
96	GFP-C3orf14_KAN361-2_3.tif:0006-0954	0.461	17.227	0	60	38.014	97.632	0.996	7.945	758	1.139	0.878	0.917	0.274749
97	GFP-C3orf14_KAN361-2_4.tif:0001-0070	0.472	18.4	0	67	88.913	7.211	0.907	8.679	828	1.315	0.76	0.865	0.300122
98	GFP-C3orf14_KAN361-2_4.tif:0002-0233	0.681	5.092	0	39	23.901	23.857	0.885	3.469	331	1.63	0.614	0.909	0.119976
99	GFP-C3orf14_KAN361-2_4.tif:0003-0308	0.566	3.167	0	15	109.957	31.596	0.842	1.792	171	1.711	0.585	0.9	0.0619816
100	GFP-C3orf14_KAN361-2_4.tif:0004-0322	0.566	12.37	0	34	60.568	33.067	0.842	7.002	668	1.173	0.853	0.837	0.242127
101	GFP-C3orf14_KAN361-2_4.tif:0005-0436	0.43	6.488	0	22	44.335	44.669	0.789	2.788	266	1.675	0.597	0.872	0.0964159
102	GFP-C3orf14_KAN361-2_4.tif:0006-0480	0.744	31.465	0	69	21.99	49.201	0.851	23.416	2234	1.793	0.558	0.916	0.809748
103	GFP-C3orf14_KAN361-2_4.tif:0007-0660	0.618	10.441	0	60	115.124	67.65	0.905	6.457	616	1.144	0.874	0.868	0.223279
104	GFP-C3orf14_KAN361-2_4.tif:0008-0733	0.671	10.422	0	55	72.598	75.114	0.871	6.991	667	1.681	0.595	0.889	0.241765
105	GFP-C3orf14_KAN361-2_4.tif:0009-0739	0.618	7.068	0	26	36.206	75.723	0.883	4.371	417	1.521	0.658	0.901	0.151148
106	GFP-C3orf14_KAN361-2_4.tif:0010-0852	0.419	27.975	0	68	3.402	87.211	0.806	11.729	1119	1.927	0.519	0.816	0.405599
107	GFP-C3orf14_KAN361-2_4.tif:0011-0952	0.587	14.696	0	73	89.976	97.452	0.911	8.627	823	1.133	0.882	0.875	0.298309
108	GFP-C3orf14_KAN361-2_4.tif:0012-1017	0.566	40.444	0	131	51.829	104.14	1	22.892	2184	1.201	0.833	0.9	0.791625
109	GFP-C3orf14_KAN361-2_4.tif:0013-1026	0.451	6.953	0	25	132.658	105.082	0.909	3.134	299	1.732	0.577	0.869	0.108377
110	GFP-C3orf14_KAN361-2_5.tif:0001-0045	0.503	9.021	0	46	96.053	4.654	0.781	4.539	433	1.633	0.612	0.835	0.156948
111	GFP-C3orf14_KAN361-2_5.tif:0002-0071	0.472	4.867	0	24	61.528	7.277	0.866	2.296	219	1.834	0.545	0.891	0.07938
112	GFP-C3orf14_KAN361-2_5.tif:0003-0157	0.556	7.321	0	34	113.026	16.104	0.916	4.067	388	1.284	0.779	0.883	0.140637
113	GFP-C3orf14_KAN361-2_5.tif:0004-0248	0.744	19.789	0	76	43.045	25.364	0.781	14.727	1405	1.601	0.624	0.83	0.509264
114	GFP-C3orf14_KAN361-2_5.tif:0005-0264	0.472	17.2	0	50	139.294	27.021	0.882	8.113	774	1.967	0.508	0.947	0.280548
115	GFP-C3orf14_KAN361-2_5.tif:0006-0268	0.503	4.958	0	21	52.95	27.427	0.967	2.495	238	1.006	0.994	0.889	0.0862668
116	GFP-C3orf14_KAN361-2_5.tif:0007-0288	0.44	8.238	0	34	8.488	29.52	0.888	3.627	346	1.184	0.845	0.848	0.125413
117	GFP-C3orf14_KAN361-2_5.tif:0008-0377	0.461	10.432	0	60	78.757	38.658	0.887	4.811	459	1.161	0.861	0.854	0.166372
118	GFP-C3orf14_KAN361-2_5.tif:0009-0492	0.556	18.755	0	52	118.879	50.307	0.827	10.419	994	1.305	0.766	0.841	0.360291
119	GFP-C3orf14_KAN361-2_5.tif:0010-0511	0.377	25.833	0	77	60.883	52.254	0.799	9.748	930	1.109	0.901	0.8	0.337093
120	GFP-C3orf14_KAN361-2_5.tif:0011-0531	0.618	10.627	0	43	23.486	54.409	0.855	6.572	627	1.244	0.804	0.837	0.227266
121	GFP-C3orf14_KAN361-2_5.tif:0012-0563	0.556	7.113	0	52	93.486	57.568	0.877	3.952	377	1.32	0.758	0.876	0.13665
122	GFP-C3orf14_KAN361-2_5.tif:0013-0621	0.702	21.03	0	94	21.166	63.549	0.864	14.769	1409	1.503	0.665	0.887	0.510714
123	GFP-C3orf14_KAN361-2_5.tif:0014-0629	0.597	28.088	0	104	43.286	64.438	0.889	16.781	1601	1.08	0.926	0.87	0.580307
124	GFP-C3orf14_KAN361-2_5.tif:0015-0670	0.776	21.797	0	71	70.059	68.548	0.92	16.907	1613	1.049	0.953	0.897	0.584657
125	GFP-C3orf14_KAN361-2_5.tif:0016-0787	0.629	6.917	0	42	49.704	80.598	0.83	4.35	415	1.783	0.561	0.889	0.150423
126	GFP-C3orf14_KAN361-2_5.tif:0017-0894	0.545	39.231	0	110	91.775	91.59	1	21.383	2040	1.33	0.752	0.92	0.73943
127	GFP-C3orf14_KAN361-2_5.tif:0018-0899	0.451	15.86	0	41	120.973	92.151	0.743	7.149	682	1.737	0.576	0.804	0.247202
128	GFP-C3orf14_KAN361-2_5.tif:0019-0941	0.461	13.523	0	44	9.868	96.406	0.728	6.237	595	1.459	0.685	0.807	0.215667
129	GFP-C3orf14_KAN361-2_5.tif:0020-0989	0.587	17.946	0	86	33.096	101.24	0.811	10.534	1005	1.065	0.939	0.812	0.364278
130	GFP-C3orf14_KAN361-2_6.tif:0001-0065	0.734	15.386	0	70	88.103	6.764	0.839	11.289	1077	1.519	0.658	0.864	0.390375
131	GFP-C3orf14_KAN361-2_6.tif:0002-0182	0.597	3.719	0	32	58.644	18.636	0.889	2.222	212	1.654	0.605	0.891	0.0768427
132	GFP-C3orf14_KAN361-2_6.tif:0003-0272	0.807	11.844	0	61	57.438	27.844	0.712	9.559	912	1.349	0.741	0.794	0.330569
133	GFP-C3orf14_KAN361-2_6.tif:0004-0379	0.629	9.85	0	41	124.98	38.877	0.849	6.195	591	1.635	0.612	0.876	0.214217
134	GFP-C3orf14_KAN361-2_6.tif:0005-0475	0.566	11.574	0	64	83.027	48.667	0.916	6.551	625	1.08	0.926	0.871	0.226541
135	GFP-C3orf14_KAN361-2_6.tif:0006-0633	0.461	11.182	0	69	25.176	64.812	0.831	5.157	492	1.266	0.79	0.846	0.178333
136	GFP-C3orf14_KAN361-2_6.tif:0007-0704	0.597	10.842	0	53	108.74	72.095	0.776	6.478	618	1.605	0.623	0.838	0.224004
137	GFP-C3orf14_KAN361-2_6.tif:0008-0840	0.43	5.659	0	20	62.693	86.074	0.997	2.432	232	1.078	0.927	0.921	0.084092
138	GFP-C3orf14_KAN361-2_6.tif:0009-0937	0.618	12.356	0	62	131.987	95.878	0.733	7.641	729	1.948	0.513	0.831	0.264237
139	GFP-C3orf14_KAN361-2_6.tif:0010-0983	0.577	6.236	0	36	31.391	100.669	0.894	3.595	343	1.196	0.836	0.866	0.124326
										826.746				0.299667
140	GFP-C3orf14_KAN361-3_1.tif:0001-0085	0.535	8.843	0	35	129.162	8.675	0.904	4.727	451	1.268	0.788	0.857	0.163472
141	GFP-C3orf14_KAN361-3_1.tif:0002-0226	0.608	16.966	0	64	77.96	23.175	0.821	10.314	984	1.556	0.643	0.853	0.356666
142	GFP-C3orf14_KAN361-3_1.tif:0003-0301	0.44	20.238	0	111	49.638	30.792	0.863	8.91	850	1.361	0.735	0.875	0.308096
143	GFP-C3orf14_KAN361-3_1.tif:0004-0351	0.577	55	0	109	138.764	35.873	0.858	31.708	3025	1.262	0.792	0.873	1.09646
144	GFP-C3orf14_KAN361-3_1.tif:0005-0360	0.702	17.209	0	61	102.965	36.789	0.815	12.086	1153	1.084	0.922	0.859	0.417923
145	GFP-C3orf14_KAN361-3_1.tif:0006-0490	0.461	3.909	0	37	56.247	50.176	0.67	1.803	172	2.574	0.389	0.889	0.0623441
146	GFP-C3orf14_KAN361-3_1.tif:0007-0526	0.335	7.625	0	47	136.128	53.891	0.914	2.558	244	1.284	0.779	0.831	0.0884416
147	GFP-C3orf14_KAN361-3_1.tif:0008-0617	0.503	9.125	0	41	79.209	63.21	0.967	4.591	438	1.486	0.673	0.897	0.15876
148	GFP-C3orf14_KAN361-3_1.tif:0009-0709	0.577	50.109	0	158	118.757	72.645	0.95	28.888	2756	1.255	0.797	0.902	0.998955
149	GFP-C3orf14_KAN361-3_1.tif:0010-0758	0.66	31.651	0	104	76.21	77.619	0.877	20.901	1994	1.424	0.702	0.875	0.722756
150	GFP-C3orf14_KAN361-3_1.tif:0011-0775	0.577	4.927	0	37	58.144	79.359	0.967	2.841	271	1.066	0.938	0.932	0.0982282
151	GFP-C3orf14_KAN361-3_1.tif:0012-0860	0.618	9.542	0	80	22.068	88.066	0.79	5.901	563	1.277	0.783	0.803	0.204068
152	GFP-C3orf14_KAN361-3_1.tif:0013-0920	0.314	5.533	0	22	129.706	94.211	0.986	1.74	166	1.242	0.805	0.87	0.0601693
153	GFP-C3orf14_KAN361-3_1.tif:0014-0944	0.503	15.729	0	71	75.86	96.669	0.924	7.914	755	1.146	0.872	0.889	0.273662
154	GFP-C3orf14_KAN361-3_2.tif:0001-0069	0.503	16.188	0	53	73.179	7.071	0.967	8.144	777	1.225	0.816	0.906	0.281636
155	GFP-C3orf14_KAN361-3_2.tif:0002-0225	0.545	21.769	0	86	78.312	23.016	0.956	11.865	1132	1.055	0.948	0.904	0.410311
156	GFP-C3orf14_KAN361-3_2.tif:0003-0283	0.65	32.032	0	110	104.113	28.946	0.844	20.817	1986	1.486	0.673	0.867	0.719857
157	GFP-C3orf14_KAN361-3_2.tif:0004-0295	0.608	6.483	0	37	16.565	30.181	0.868	3.941	376	1.416	0.706	0.879	0.136287
158	GFP-C3orf14_KAN361-3_2.tif:0005-0366	0.535	12.431	0	45	133.197	37.503	0.865	6.645	634	1.213	0.824	0.843	0.229803
159	GFP-C3orf14_KAN361-3_2.tif:0006-0391	0.587	28.446	0	103	47.638	39.972	0.873	16.698	1593	1.531	0.653	0.896	0.577408
160	GFP-C3orf14_KAN361-3_2.tif:0007-0594	0.472	11.956	0	53	10.116	60.859	0.97	5.639	538	1.458	0.686	0.928	0.195007
161	GFP-C3orf14_KAN361-3_2.tif:0008-0631	0.577	30.527	1	64	117.257	64.641	0.858	17.599	1679	1.591	0.628	0.873	0.60858
162	GFP-C3orf14_KAN361-3_2.tif:0009-0716	0.566	7.556	0	36	24.078	73.314	0.933	4.277	408	1.453	0.688	0.9	0.147886
163	GFP-C3orf14_KAN361-3_2.tif:0010-0798	0.472	24.533	0	75	99.914	81.678	0.827	11.572	1104	1.372	0.729	0.849	0.400162
164	GFP-C3orf14_KAN361-3_2.tif:0011-0840	0.493	29.766	0	103	120.824	86.019	0.887	14.664	1399	1.253	0.798	0.847	0.507089
165	GFP-C3orf14_KAN361-3_2.tif:0012-0869	0.65	27.774	0	147	83.956	88.936	0.706	18.05	1722	1.569	0.637	0.785	0.624166
166	GFP-C3orf14_KAN361-3_3.tif:0001-0185	0.346	20.091	0	68	48.487	18.985	0.846	6.949	663	1.605	0.623	0.835	0.240315
167	GFP-C3orf14_KAN361-3_3.tif:0002-0309	0.66	28.54	0	100	96.684	31.754	0.744	18.846	1798	1.141	0.876	0.787	0.651713
168	GFP-C3orf14_KAN361-3_3.tif:0003-0317	0.482	19.174	0	83	6.753	32.468	0.909	9.245	882	1.16	0.862	0.836	0.319695
169	GFP-C3orf14_KAN361-3_3.tif:0004-0458	0.461	21.091	0	137	45.676	46.881	0.93	9.727	928	1.352	0.739	0.871	0.336368
170	GFP-C3orf14_KAN361-3_3.tif:0005-0584	0.577	17	0	94	50.138	59.795	0.766	9.801	935	1.639	0.61	0.791	0.338905
171	GFP-C3orf14_KAN361-3_3.tif:0006-0663	0.66	18.683	0	90	67.291	67.985	0.693	12.337	1177	1.9	0.526	0.824	0.426622
172	GFP-C3orf14_KAN361-3_3.tif:0007-0670	0.44	5.405	0	61	111.917	68.617	0.793	2.379	227	1.141	0.876	0.816	0.0822797
173	GFP-C3orf14_KAN361-3_3.tif:0008-0744	0.535	4.922	0	24	16.482	76.148	0.981	2.631	251	1.097	0.912	0.911	0.0909789
174	GFP-C3orf14_KAN361-3_3.tif:0009-0759	0.367	4.943	0	22	90.234	77.729	0.834	1.813	173	1.699	0.589	0.864	0.0627066
175	GFP-C3orf14_KAN361-3_3.tif:0010-0787	0.503	7.188	0	22	70.02	80.574	0.924	3.616	345	1.164	0.859	0.889	0.125051
176	GFP-C3orf14_KAN361-3_3.tif:0011-0985	0.524	19.02	0	83	40.123	100.98	0.864	9.968	951	1.079	0.927	0.877	0.344705
177	GFP-C3orf14_KAN361-3_4.tif:0001-0054	0.556	7.226	0	23	36.675	5.506	0.899	4.015	383	1.434	0.697	0.862	0.138824
178	GFP-C3orf14_KAN361-3_4.tif:0002-0071	0.346	5.909	0	26	72.829	7.274	0.846	2.044	195	1.389	0.72	0.846	0.0706808
179	GFP-C3orf14_KAN361-3_4.tif:0003-0215	0.482	10.804	0	33	30.182	22.03	0.945	5.209	497	1.233	0.811	0.911	0.180145
180	GFP-C3orf14_KAN361-3_4.tif:0004-0263	0.671	11.266	0	48	58.082	26.993	0.942	7.557	721	1.335	0.749	0.889	0.261338
181	GFP-C3orf14_KAN361-3_4.tif:0005-0316	0.577	8.8	0	38	67.444	32.385	0.91	5.073	484	1.223	0.818	0.894	0.175433
182	GFP-C3orf14_KAN361-3_4.tif:0006-0317	0.65	16.371	0	52	105.882	32.529	0.706	10.639	1015	2.115	0.473	0.81	0.367903
183	GFP-C3orf14_KAN361-3_4.tif:0007-0317	0.325	8.839	0	40	22.093	32.46	0.777	2.872	274	1.295	0.772	0.756	0.0993156
184	GFP-C3orf14_KAN361-3_4.tif:0008-0394	0.325	222.258	125	462	52.46	40.376	0.928	72.22	6890	1.559	0.641	0.939	2.49739
185	GFP-C3orf14_KAN361-3_4.tif:0009-0522	0.587	24.232	0	91	61.441	53.448	0.873	14.224	1357	1.165	0.858	0.875	0.491866
186	GFP-C3orf14_KAN361-3_4.tif:0010-0573	0.44	5.286	0	29	40.214	58.735	0.932	2.327	222	1.28	0.781	0.875	0.0804674
187	GFP-C3orf14_KAN361-3_4.tif:0011-0575	0.86	8.598	0	61	94.239	58.843	0.82	7.39	705	1.385	0.722	0.85	0.255538
188	GFP-C3orf14_KAN361-3_4.tif:0012-0744	0.618	8.644	0	40	41.115	76.198	0.943	5.346	510	1.331	0.752	0.887	0.184857
189	GFP-C3orf14_KAN361-3_4.tif:0013-0772	0.377	2.528	0	15	95.598	79.086	1	0.954	91	1.112	0.9	0.878	0.0329844
190	GFP-C3orf14_KAN361-3_4.tif:0014-0828	0.503	13.896	0	90	127.59	84.846	0.986	6.991	667	1.194	0.837	0.932	0.241765
191	GFP-C3orf14_KAN361-3_4.tif:0015-0842	0.608	10.414	0	39	33.881	86.297	0.868	6.331	604	1.359	0.736	0.879	0.218929
192	GFP-C3orf14_KAN361-3_4.tif:0016-0892	0.545	20.75	0	104	8.133	91.389	0.939	11.31	1079	1.302	0.768	0.889	0.3911
193	GFP-C3orf14_KAN361-3_4.tif:0017-1023	0.671	12.656	0	57	103.872	104.742	0.885	8.49	810	1.374	0.728	0.921	0.293597
194	GFP-C3orf14_KAN361-3_5.tif:0001-0009	0.639	10.918	0	71	81.803	0.835	0.758	6.981	666	1.542	0.649	0.853	0.241402
195	GFP-C3orf14_KAN361-3_5.tif:0002-0099	0.545	18.058	0	108	38.09	10.059	0.825	9.842	939	1.589	0.629	0.904	0.340355
196	GFP-C3orf14_KAN361-3_5.tif:0003-0177	0.482	13	0	77	72.788	18.175	0.945	6.268	598	1.33	0.752	0.92	0.216754
197	GFP-C3orf14_KAN361-3_5.tif:0004-0202	0.524	32.46	0	98	4.087	20.671	0.749	17.012	1623	1.375	0.727	0.806	0.588282
198	GFP-C3orf14_KAN361-3_5.tif:0005-0208	0.461	10.614	0	40	105.057	21.279	0.824	4.895	467	1.459	0.685	0.907	0.169271
199	GFP-C3orf14_KAN361-3_5.tif:0006-0250	0.639	16.23	0	86	132.037	25.698	0.817	10.377	990	1.144	0.874	0.836	0.358841
200	GFP-C3orf14_KAN361-3_5.tif:0007-0272	0.556	22.245	0	114	13.106	27.833	0.827	12.358	1179	1.404	0.712	0.841	0.427347
201	GFP-C3orf14_KAN361-3_5.tif:0008-0299	0.692	20.121	0	99	119.876	30.688	0.87	13.92	1328	1.412	0.708	0.841	0.481354
202	GFP-C3orf14_KAN361-3_5.tif:0009-0386	0.786	35.787	0	107	74.612	39.607	0.76	28.133	2684	1.475	0.678	0.824	0.972858
203	GFP-C3orf14_KAN361-3_5.tif:0010-0541	0.66	20.508	0	86	50.528	55.339	0.892	13.543	1292	1.086	0.921	0.869	0.468306
204	GFP-C3orf14_KAN361-3_5.tif:0011-0554	0.503	17.729	0	75	42.036	56.764	0.924	8.92	851	1.54	0.649	0.914	0.308458
205	GFP-C3orf14_KAN361-3_5.tif:0012-0556	0.493	197.255	125	323	6.17	56.921	0.778	97.177	9271	1.776	0.563	0.803	3.36042
206	GFP-C3orf14_KAN361-3_5.tif:0013-0602	0.734	7.429	0	51	115.301	61.579	0.839	5.451	520	1.538	0.65	0.886	0.188482
207	GFP-C3orf14_KAN361-3_5.tif:0014-0666	0.335	193.094	124	314	6.117	68.192	0.82	64.767	6179	2.135	0.468	0.865	2.23968
208	GFP-C3orf14_KAN361-3_5.tif:0015-0762	0.597	16.579	0	53	32.924	77.968	0.868	9.905	945	1.068	0.936	0.905	0.34253
209	GFP-C3orf14_KAN361-3_5.tif:0016-0766	0.335	195.5	128	312	21.02	78.462	0.704	65.575	6256	2.562	0.39	0.853	2.26758
210	GFP-C3orf14_KAN361-3_5.tif:0017-0895	0.639	30.213	0	97	86.979	91.669	0.83	19.318	1843	1.241	0.806	0.865	0.668024
211	GFP-C3orf14_KAN361-3_5.tif:0018-1002	0.409	22.692	0	63	69.405	102.55	0.786	9.276	885	1.903	0.525	0.867	0.320782
212	GFP-C3orf14_KAN361-3_5.tif:0019-1034	0.419	7.625	0	28	39.212	105.916	0.822	3.197	305	1.763	0.567	0.909	0.110552
213	GFP-C3orf14_KAN361-3_6.tif:0001-0060	0.629	33.667	0	123	44.925	6.182	0.936	21.173	2020	1.197	0.835	0.882	0.732181
214	GFP-C3orf14_KAN361-3_6.tif:0002-0085	0.43	5.61	0	31	112.46	8.786	0.884	2.411	230	1.693	0.591	0.891	0.0833671
215	GFP-C3orf14_KAN361-3_6.tif:0003-0121	0.524	8.36	0	41	0.61	12.466	0.842	4.381	418	1.545	0.647	0.943	0.151511
216	GFP-C3orf14_KAN361-3_6.tif:0004-0129	0.618	5.915	0	34	23.484	13.222	0.905	3.658	349	1.147	0.872	0.849	0.126501
217	GFP-C3orf14_KAN361-3_6.tif:0005-0357	0.618	7.831	0	41	45.298	36.52	0.761	4.843	462	1.757	0.569	0.843	0.167459
218	GFP-C3orf14_KAN361-3_6.tif:0006-0409	0.744	14.408	0	73	12.373	41.924	0.838	10.723	1023	1.104	0.905	0.861	0.370802
219	GFP-C3orf14_KAN361-3_6.tif:0007-0415	0.482	24.478	0	113	125.813	42.506	0.868	11.803	1126	1.103	0.907	0.836	0.408136
220	GFP-C3orf14_KAN361-3_6.tif:0008-0451	0.535	14.569	0	110	83.373	46.155	0.921	7.788	743	1.282	0.78	0.872	0.269312
221	GFP-C3orf14_KAN361-3_6.tif:0009-0457	0.587	16.875	0	54	107.683	46.764	0.889	9.905	945	1.198	0.835	0.896	0.34253
222	GFP-C3orf14_KAN361-3_6.tif:0010-0747	0.493	44.766	0	198	77.541	76.495	0.966	22.054	2104	1.447	0.691	0.949	0.762628
223	GFP-C3orf14_KAN361-3_6.tif:0011-0772	0.65	10.371	0	61	19.018	79.013	0.771	6.74	643	1.383	0.723	0.844	0.233065
224	GFP-C3orf14_KAN361-3_6.tif:0012-0894	0.618	7.966	0	57	55.526	91.493	0.803	4.926	470	1.734	0.577	0.874	0.170359
225	GFP-C3orf14_KAN361-3_6.tif:0013-0998	0.356	11.941	0	63	34.042	102.185	0.994	4.256	406	1.363	0.734	0.919	0.147161
226	GFP-C3orf14_KAN361-3_6.tif:0014-1021	0.514	11.041	0	51	137.44	104.59	0.885	5.671	541	1.538	0.65	0.875	0.196094
										1219.35				0.441973
227	GFP-C3orf14_KAN361-4_1.tif:0001-0070	0.503	25.646	0	97	9.391	7.273	0.924	12.903	1231	1.387	0.721	0.897	0.446195
228	GFP-C3orf14_KAN361-4_1.tif:0002-0166	0.734	41.129	0	141	63.93	17.108	0.826	30.177	2879	1.253	0.798	0.838	1.04354
229	GFP-C3orf14_KAN361-4_1.tif:0003-0313	0.577	15.745	0	73	110.04	32.07	0.95	9.077	866	1.164	0.859	0.902	0.313895
230	GFP-C3orf14_KAN361-4_1.tif:0004-0537	0.786	55.653	0	171	107.417	54.93	0.885	43.751	4174	1.115	0.897	0.888	1.51293
231	GFP-C3orf14_KAN361-4_1.tif:0005-0646	0.482	7.652	0	44	17.142	66.138	0.885	3.69	352	1.643	0.609	0.893	0.127588
232	GFP-C3orf14_KAN361-4_1.tif:0006-0656	0.65	21.645	0	187	53.08	67.228	0.8	14.067	1342	1.43	0.699	0.832	0.486429
233	GFP-C3orf14_KAN361-4_1.tif:0007-0684	0.346	198.727	121	304	70.083	69.974	0.763	68.74	6558	1.897	0.527	0.835	2.37705
234	GFP-C3orf14_KAN361-4_1.tif:0008-0733	0.639	18.23	0	122	87.545	75.081	0.817	11.656	1112	1.321	0.757	0.819	0.403062
235	GFP-C3orf14_KAN361-4_1.tif:0009-0742	0.524	7.52	0	42	67.719	75.981	1	3.941	376	1.11	0.901	0.943	0.136287
236	GFP-C3orf14_KAN361-4_1.tif:0010-0747	0.556	7.811	0	30	41.456	76.518	0.877	4.339	414	1.287	0.777	0.876	0.150061
237	GFP-C3orf14_KAN361-4_1.tif:0011-1003	0.608	4.466	0	26	23.246	102.778	0.748	2.715	259	1.1	0.909	0.806	0.0938786
238	GFP-C3orf14_KAN361-4_1.tif:0012-1008	0.556	9.566	0	54	114.685	103.28	0.916	5.314	507	1.319	0.758	0.891	0.18377
239	GFP-C3orf14_KAN361-4_2.tif:0001-0067	0.702	49.687	0	125	44.969	6.921	0.933	34.894	3329	1.148	0.871	0.87	1.20665
240	GFP-C3orf14_KAN361-4_2.tif:0002-0297	0.398	19.316	0	58	125.988	30.345	0.836	7.694	734	1.505	0.664	0.916	0.26605
241	GFP-C3orf14_KAN361-4_2.tif:0003-0316	0.503	9.042	0	39	14.082	32.406	0.924	4.549	434	1.324	0.755	0.897	0.15731
242	GFP-C3orf14_KAN361-4_2.tif:0004-0397	0.566	14.093	0	46	41.108	40.687	0.795	7.977	761	1.075	0.931	0.818	0.275836
243	GFP-C3orf14_KAN361-4_2.tif:0005-0524	0.566	5.87	0	41	100.612	53.638	0.894	3.323	317	1.306	0.766	0.893	0.114902
244	GFP-C3orf14_KAN361-4_2.tif:0006-0550	0.451	27.372	0	103	62.668	56.385	0.827	12.337	1177	1.362	0.734	0.851	0.426622
245	GFP-C3orf14_KAN361-4_2.tif:0007-0580	0.702	13.284	0	47	42.515	59.394	0.763	9.329	890	1.437	0.696	0.827	0.322594
246	GFP-C3orf14_KAN361-4_2.tif:0008-0709	0.65	6.532	0	40	138.14	72.639	0.844	4.245	405	1.453	0.688	0.861	0.146799
247	GFP-C3orf14_KAN361-4_2.tif:0009-0750	0.587	7.464	0	69	18.604	76.762	0.873	4.381	418	1.114	0.897	0.848	0.151511
248	GFP-C3orf14_KAN361-4_2.tif:0010-0859	0.849	3.926	0	27	96.009	87.923	0.81	3.333	318	1.572	0.636	0.844	0.115264
249	GFP-C3orf14_KAN361-4_2.tif:0011-0887	0.608	20.655	0	119	108.665	90.777	0.721	12.557	1198	1.56	0.641	0.8	0.434234
250	GFP-C3orf14_KAN361-4_3.tif:0001-0006	0.514	25.776	0	90	81.072	0.54	0.705	13.239	1263	2.076	0.482	0.883	0.457794
251	GFP-C3orf14_KAN361-4_3.tif:0002-0264	0.524	9.42	0	50	33.868	27.074	0.827	4.937	471	1.461	0.684	0.833	0.170721
252	GFP-C3orf14_KAN361-4_3.tif:0003-0269	0.608	20.81	0	72	94.536	27.592	0.84	12.652	1207	1.503	0.665	0.817	0.437496
253	GFP-C3orf14_KAN361-4_3.tif:0004-0334	0.765	25.918	0	95	136.229	34.245	0.684	19.832	1892	1.841	0.543	0.802	0.685785
254	GFP-C3orf14_KAN361-4_3.tif:0005-0338	0.618	7.102	0	28	94.292	34.685	0.869	4.392	419	1.504	0.665	0.861	0.151873
255	GFP-C3orf14_KAN361-4_3.tif:0006-0409	0.765	14.205	0	60	61.111	41.891	0.808	10.87	1037	1.51	0.662	0.82	0.375877
256	GFP-C3orf14_KAN361-4_3.tif:0007-0575	0.566	11.37	0	39	19.847	58.875	0.842	6.436	614	1.434	0.697	0.871	0.222554
257	GFP-C3orf14_KAN361-4_3.tif:0008-0596	0.577	6.418	0	32	103.577	61.065	0.95	3.7	353	1.279	0.782	0.902	0.12795
258	GFP-C3orf14_KAN361-4_3.tif:0009-0609	0.577	350.727	130	742	47.172	62.401	1	202.195	19290	1.256	0.796	0.948	6.99196
259	GFP-C3orf14_KAN361-4_3.tif:0010-0755	0.577	5.164	0	80	49.831	77.267	0.858	2.977	284	1.261	0.793	0.866	0.10294
260	GFP-C3orf14_KAN361-4_3.tif:0011-0835	0.608	3.897	0	28	71.806	85.55	0.821	2.369	226	1.781	0.561	0.847	0.0819172
261	GFP-C3orf14_KAN361-4_3.tif:0012-0884	0.409	13.462	0	51	91.144	90.498	0.824	5.503	525	1.305	0.767	0.821	0.190294
262	GFP-C3orf14_KAN361-4_4.tif:0001-0074	0.66	9.873	0	42	44.979	7.605	0.858	6.52	622	1.438	0.695	0.863	0.225454
263	GFP-C3orf14_KAN361-4_4.tif:0002-0101	0.618	11.39	0	31	133.526	10.317	0.883	7.044	672	1.331	0.751	0.887	0.243577
264	GFP-C3orf14_KAN361-4_4.tif:0003-0113	0.461	21.773	0	99	83.997	11.618	0.996	10.042	958	1.138	0.879	0.917	0.347242
265	GFP-C3orf14_KAN361-4_4.tif:0004-0231	0.524	13.26	0	68	85.601	23.578	0.793	6.949	663	1.592	0.628	0.87	0.240315
266	GFP-C3orf14_KAN361-4_4.tif:0005-0432	0.681	23.692	0	122	81.855	44.233	0.92	16.142	1540	1.127	0.888	0.89	0.558197
267	GFP-C3orf14_KAN361-4_4.tif:0006-0488	0.755	8.944	0	67	124.472	50.005	0.929	6.75	644	1.282	0.78	0.894	0.233428
268	GFP-C3orf14_KAN361-4_4.tif:0007-0530	0.524	38.54	0	100	41.012	54.252	0.864	20.199	1927	1.277	0.783	0.855	0.698471
269	GFP-C3orf14_KAN361-4_4.tif:0008-0547	0.545	38.712	0	232	81.989	56.05	0.939	21.1	2013	1.304	0.767	0.889	0.729643
270	GFP-C3orf14_KAN361-4_4.tif:0009-0617	0.43	38.293	0	176	10.579	63.185	0.928	16.457	1570	1.108	0.903	0.891	0.569071
271	GFP-C3orf14_KAN361-4_4.tif:0010-0758	0.618	25.186	0	103	101.91	77.597	0.883	15.576	1486	1.162	0.861	0.887	0.538624
272	GFP-C3orf14_KAN361-4_4.tif:0011-0777	0.797	16.513	0	48	70.483	79.5	0.813	13.155	1255	1.325	0.755	0.835	0.454894
273	GFP-C3orf14_KAN361-4_4.tif:0012-0821	0.545	7.596	0	26	9.903	84.059	0.846	4.14	395	1.386	0.722	0.839	0.143174
274	GFP-C3orf14_KAN361-4_4.tif:0013-0959	0.556	16.17	0	53	130.394	98.179	0.827	8.983	857	1.269	0.788	0.835	0.310633
275	GFP-C3orf14_KAN361-4_4.tif:0014-0997	0.367	31.486	5	70	96.634	102.181	0.755	11.551	1102	1.797	0.557	0.824	0.399437
276	GFP-C3orf14_KAN361-4_5.tif:0001-0058	0.577	11.527	0	61	76.066	5.876	0.858	6.645	634	1.259	0.794	0.859	0.229803
277	GFP-C3orf14_KAN361-4_5.tif:0002-0066	0.472	26.244	0	92	31.02	6.861	0.85	12.379	1181	1.291	0.774	0.841	0.428072
278	GFP-C3orf14_KAN361-4_5.tif:0003-0180	0.629	17.633	0	48	80.767	18.425	0.774	11.09	1058	1.295	0.772	0.828	0.383489
279	GFP-C3orf14_KAN361-4_5.tif:0004-0388	0.587	16.375	0	53	101.876	39.806	0.859	9.612	917	1.791	0.558	0.868	0.332381
280	GFP-C3orf14_KAN361-4_5.tif:0005-0417	0.86	15.268	0	110	23.273	42.672	0.82	13.123	1252	1.728	0.579	0.891	0.453807
281	GFP-C3orf14_KAN361-4_5.tif:0006-0568	0.587	21.089	0	78	37.554	58.18	0.95	12.379	1181	1.208	0.828	0.862	0.428072
282	GFP-C3orf14_KAN361-4_5.tif:0007-0586	0.608	15.586	0	74	94.295	60.069	0.854	9.476	904	1.108	0.903	0.853	0.327669
283	GFP-C3orf14_KAN361-4_5.tif:0008-0840	0.734	15.971	0	61	79.977	86.029	0.938	11.719	1118	1.314	0.761	0.903	0.405237
284	GFP-C3orf14_KAN361-4_5.tif:0009-0875	0.472	6.778	0	51	21.847	89.623	0.777	3.197	305	1.297	0.771	0.841	0.110552
285	GFP-C3orf14_KAN361-4_5.tif:0010-0931	0.367	4.857	0	31	27.592	95.271	0.74	1.782	170	2.279	0.439	0.814	0.0616192
286	GFP-C3orf14_KAN361-4_6.tif:0001-0076	0.587	12.196	0	67	37.989	7.839	0.927	7.159	683	1.17	0.855	0.896	0.247564
287	GFP-C3orf14_KAN361-4_6.tif:0002-0146	0.744	17.859	0	72	83.66	14.94	0.77	13.291	1268	1.297	0.771	0.83	0.459606
288	GFP-C3orf14_KAN361-4_6.tif:0003-0221	0.744	14.352	0	58	19.117	22.612	0.72	10.681	1019	1.937	0.516	0.835	0.369352
289	GFP-C3orf14_KAN361-4_6.tif:0004-0226	0.577	10.164	0	92	37.443	23.12	0.737	5.859	559	1.54	0.649	0.809	0.202618
290	GFP-C3orf14_KAN361-4_6.tif:0005-0279	0.639	4.852	0	27	117.405	28.584	0.898	3.103	296	1.192	0.839	0.853	0.10729
291	GFP-C3orf14_KAN361-4_6.tif:0006-0571	0.702	21.104	0	94	82.812	58.473	0.803	14.821	1414	1.459	0.685	0.859	0.512526
292	GFP-C3orf14_KAN361-4_6.tif:0007-0615	0.629	6.067	0	54	126.992	62.906	0.863	3.815	364	1.269	0.788	0.889	0.131937
293	GFP-C3orf14_KAN361-4_6.tif:0008-0765	0.744	5.845	0	25	54.676	78.386	0.797	4.35	415	1.042	0.96	0.816	0.150423
294	GFP-C3orf14_KAN361-4_6.tif:0009-0776	0.556	11.208	0	62	72.921	79.505	0.899	6.226	594	1.053	0.95	0.848	0.215305
295	GFP-C3orf14_KAN361-4_6.tif:0010-0855	0.377	23.583	0	109	31.306	87.561	0.761	8.899	849	1.495	0.669	0.8	0.307733
296	GFP-C3orf14_KAN361-4_6.tif:0011-0860	0.66	12.921	0	56	105.959	88.073	0.877	8.532	814	1.326	0.754	0.851	0.295047
										1290.44				0.467741
297	GFP-C3orf14_KAN361-5_1.tif:0001-0294	0.618	112.593	0	390	61.527	30.139	0.822	69.631	6643	1.211	0.826	0.819	2.40786
298	GFP-C3orf14_KAN361-5_1.tif:0002-0316	0.723	72.899	0	241	101.997	32.334	0.939	52.724	5030	1.317	0.759	0.908	1.8232
299	GFP-C3orf14_KAN361-5_1.tif:0003-0369	0.807	108.649	0	453	36.411	37.745	0.721	87.691	8366	1.559	0.641	0.832	3.03239
300	GFP-C3orf14_KAN361-5_1.tif:0004-0405	0.818	97.551	0	431	73.038	41.424	0.846	79.756	7609	1.518	0.659	0.857	2.758
301	GFP-C3orf14_KAN361-5_1.tif:0005-0448	0.514	107.143	0	377	130.9	45.924	0.901	55.03	5250	1.22	0.82	0.916	1.90294
302	GFP-C3orf14_KAN361-5_1.tif:0006-0536	0.335	178.469	121	269	115.969	54.895	0.936	59.862	5711	1.671	0.598	0.901	2.07004
303	GFP-C3orf14_KAN361-5_1.tif:0007-0566	0.723	87.783	0	275	132.954	57.981	0.89	63.489	6057	1.086	0.921	0.863	2.19545
304	GFP-C3orf14_KAN361-5_1.tif:0008-0586	0.86	158.622	0	436	126.211	60.095	0.859	136.338	13007	1.182	0.846	0.882	4.71459
305	GFP-C3orf14_KAN361-5_1.tif:0009-0619	0.503	91.125	0	230	12.409	63.442	0.809	45.848	4374	1.409	0.71	0.889	1.58542
306	GFP-C3orf14_KAN361-5_1.tif:0010-0675	0.891	61.376	0	231	58.607	69.115	0.878	54.684	5217	1.19	0.841	0.867	1.89098
307	GFP-C3orf14_KAN361-5_1.tif:0011-0769	0.556	95.981	0	300	11.464	78.715	1	53.321	5087	1.058	0.945	0.922	1.84386
308	GFP-C3orf14_KAN361-5_1.tif:0012-0782	0.713	36.338	0	214	95.04	80.02	0.891	25.901	2471	1.401	0.714	0.883	0.895653
309	GFP-C3orf14_KAN361-5_1.tif:0013-0845	0.713	124.868	0	429	123.137	86.531	0.877	89.001	8491	1.129	0.885	0.861	3.0777
310	GFP-C3orf14_KAN361-5_1.tif:0014-0962	0.503	77.167	0	195	126.022	98.522	0.866	38.825	3704	1.085	0.922	0.842	1.34257
311	GFP-C3orf14_KAN361-5_2.tif:0001-0066	0.545	94.269	0	267	124.383	6.745	0.876	51.382	4902	1.29	0.775	0.904	1.77681
312	GFP-C3orf14_KAN361-5_2.tif:0002-0138	0.535	97.451	0	244	45.025	14.124	0.881	52.095	4970	1.696	0.59	0.911	1.80145
313	GFP-C3orf14_KAN361-5_2.tif:0003-0302	0.556	44.811	0	200	88.557	30.883	0.827	24.894	2375	1.19	0.84	0.855	0.860856
314	GFP-C3orf14_KAN361-5_2.tif:0004-0422	0.734	79.414	0	254	5.094	43.192	0.903	58.269	5559	1.524	0.656	0.903	2.01495
315	GFP-C3orf14_KAN361-5_2.tif:0005-0426	0.535	99.608	0	301	36.143	43.579	0.981	53.248	5080	1.256	0.796	0.927	1.84133
316	GFP-C3orf14_KAN361-5_2.tif:0006-0537	0.723	96.783	0	290	75.54	54.923	0.857	69.998	6678	1.696	0.589	0.896	2.42055
317	GFP-C3orf14_KAN361-5_2.tif:0007-0572	0.744	145.169	0	431	62.124	58.573	0.809	108.037	10307	1.84	0.543	0.871	3.73593
318	GFP-C3orf14_KAN361-5_2.tif:0008-0638	0.388	29.405	0	96	102.714	65.387	0.821	11.404	1088	1.088	0.919	0.796	0.394363
319	GFP-C3orf14_KAN361-5_2.tif:0009-0660	0.535	151.235	0	372	38.402	67.556	0.963	80.847	7713	1.101	0.908	0.887	2.7957
320	GFP-C3orf14_KAN361-5_2.tif:0010-0714	0.639	67.361	0	181	91.788	73.092	0.898	43.07	4109	1.216	0.822	0.865	1.48937
321	GFP-C3orf14_KAN361-5_2.tif:0011-0729	0.671	100.562	0	316	13.207	74.634	0.871	67.461	6436	1.335	0.749	0.877	2.33283
322	GFP-C3orf14_KAN361-5_2.tif:0012-0896	0.618	71.407	0	237	69.089	91.746	0.883	44.16	4213	1.212	0.825	0.874	1.52707
323	GFP-C3orf14_KAN361-5_2.tif:0013-0946	0.472	13.378	0	57	124.333	96.876	0.951	6.31	602	1.26	0.794	0.874	0.218204
324	GFP-C3orf14_KAN361-5_2.tif:0014-0971	0.461	212.091	63	414	69.977	99.412	0.698	97.817	9332	2.243	0.446	0.772	3.38253
325	GFP-C3orf14_KAN361-5_2.tif:0015-1034	0.367	61.4	10	186	28.51	105.936	0.755	22.526	2149	2.026	0.493	0.864	0.778939
326	GFP-C3orf14_KAN361-5_3.tif:0001-0055	0.786	103.667	0	427	105.673	5.623	0.797	81.496	7775	1.795	0.557	0.877	2.81817
327	GFP-C3orf14_KAN361-5_3.tif:0002-0161	0.597	74.246	0	270	130.68	16.563	0.943	44.359	4232	1.18	0.848	0.898	1.53395
328	GFP-C3orf14_KAN361-5_3.tif:0003-0204	0.577	115.273	21	266	44.027	20.9	0.95	66.455	6340	1.158	0.863	0.902	2.29803
329	GFP-C3orf14_KAN361-5_3.tif:0004-0332	0.566	188.889	23	663	70.874	34.078	0.916	106.915	10200	1.039	0.962	0.878	3.69715
330	GFP-C3orf14_KAN361-5_3.tif:0005-0398	0.797	91.882	0	536	93.423	40.814	0.808	73.195	6983	1.808	0.553	0.874	2.5311
331	GFP-C3orf14_KAN361-5_3.tif:0006-0429	0.524	18.9	0	85	13.375	43.905	0.813	9.905	945	1.271	0.787	0.826	0.34253
332	GFP-C3orf14_KAN361-5_3.tif:0007-0465	0.692	49.167	0	239	122.212	47.654	0.972	34.014	3245	1.286	0.778	0.898	1.1762
333	GFP-C3orf14_KAN361-5_3.tif:0008-0585	0.65	29.71	0	114	56.087	59.898	0.877	19.308	1842	1.272	0.786	0.867	0.667662
334	GFP-C3orf14_KAN361-5_3.tif:0009-0710	0.514	50.347	0	254	127.497	72.7	0.831	25.859	2467	1.288	0.776	0.838	0.894203
335	GFP-C3orf14_KAN361-5_3.tif:0010-0732	0.765	53.014	0	179	107.06	74.998	0.832	40.565	3870	1.196	0.836	0.854	1.40274
336	GFP-C3orf14_KAN361-5_3.tif:0011-0910	0.472	26.8	0	106	22.359	93.241	0.827	12.641	1206	1.739	0.575	0.909	0.437134
337	GFP-C3orf14_KAN361-5_3.tif:0012-0941	0.325	38.484	0	100	93.482	96.332	0.795	12.505	1193	1.849	0.541	0.805	0.432421
338	GFP-C3orf14_KAN361-5_4.tif:0001-0053	0.577	87.691	0	434	48.412	5.487	0.894	50.554	4823	1.294	0.773	0.859	1.74817
339	GFP-C3orf14_KAN361-5_4.tif:0002-0244	0.849	120.432	0	467	22.517	24.997	0.794	102.251	9755	1.529	0.654	0.862	3.53585
340	GFP-C3orf14_KAN361-5_4.tif:0003-0346	0.786	116.72	0	501	132.565	35.509	0.854	91.758	8754	1.207	0.828	0.872	3.17302
341	GFP-C3orf14_KAN361-5_4.tif:0004-0359	0.713	92.456	0	456	58.137	36.83	0.858	65.899	6287	1.707	0.586	0.913	2.27882
342	GFP-C3orf14_KAN361-5_4.tif:0005-0415	0.797	89.132	0	369	45.783	42.496	0.866	71.004	6774	1.254	0.798	0.889	2.45534
343	GFP-C3orf14_KAN361-5_4.tif:0006-0429	0.818	125.282	0	582	78.484	44.016	0.902	102.429	9772	1.375	0.727	0.912	3.54201
344	GFP-C3orf14_KAN361-5_4.tif:0007-0432	0.901	138.163	0	596	98.846	44.25	0.832	124.545	11882	1.475	0.678	0.86	4.30682
345	GFP-C3orf14_KAN361-5_4.tif:0008-0607	0.367	284.571	126	769	71.343	62.191	1	104.399	9960	1.14	0.877	0.921	3.61016
346	GFP-C3orf14_KAN361-5_4.tif:0009-0654	0.702	47.493	0	209	126.249	66.897	0.763	33.353	3182	1.462	0.684	0.832	1.15337
347	GFP-C3orf14_KAN361-5_4.tif:0010-0694	0.671	139.062	0	476	28.937	71.073	0.942	93.289	8900	1.148	0.871	0.895	3.22594
348	GFP-C3orf14_KAN361-5_4.tif:0011-0760	0.807	67.13	0	321	82.808	77.817	0.818	54.181	5169	1.242	0.805	0.856	1.87358
349	GFP-C3orf14_KAN361-5_4.tif:0012-0806	0.713	67.588	0	192	141.135	82.462	0.926	48.175	4596	1.121	0.892	0.895	1.66589
350	GFP-C3orf14_KAN361-5_4.tif:0013-0873	0.409	52.667	0	174	118.123	89.414	0.883	21.53	2054	1.191	0.84	0.886	0.744504
351	GFP-C3orf14_KAN361-5_4.tif:0014-0939	0.713	76.441	0	310	138.759	96.133	0.877	54.485	5198	1.285	0.778	0.866	1.8841
352	GFP-C3orf14_KAN361-5_4.tif:0015-0992	0.734	140.9	0	498	29.562	101.585	0.938	103.383	9863	1.065	0.939	0.892	3.575
353	GFP-C3orf14_KAN361-5_5.tif:0001-0007	0.734	95.871	0	493	89.398	0.733	0.87	70.344	6711	1.125	0.889	0.875	2.43251
354	GFP-C3orf14_KAN361-5_5.tif:0002-0011	0.608	58.448	0	210	77.577	1.126	0.868	35.534	3390	1.516	0.66	0.866	1.22876
355	GFP-C3orf14_KAN361-5_5.tif:0003-0017	0.597	108.544	0	296	129.044	1.763	0.839	64.851	6187	1.062	0.942	0.844	2.24257
356	GFP-C3orf14_KAN361-5_5.tif:0004-0031	0.639	107.279	5	271	24.999	3.19	1	68.593	6544	1.169	0.855	0.938	2.37198
357	GFP-C3orf14_KAN361-5_5.tif:0005-0119	0.723	104.304	0	397	108.664	12.205	0.904	75.438	7197	1.298	0.77	0.896	2.60867
358	GFP-C3orf14_KAN361-5_5.tif:0006-0125	0.566	98.759	0	211	63.419	12.803	0.975	55.9	5333	1.065	0.939	0.885	1.93303
359	GFP-C3orf14_KAN361-5_5.tif:0007-0266	0.755	105.944	0	415	82.452	27.276	0.863	79.956	7628	1.365	0.733	0.894	2.76489
360	GFP-C3orf14_KAN361-5_5.tif:0008-0279	0.524	8.06	0	31	17.036	28.626	0.813	4.224	403	1.268	0.788	0.833	0.146074
361	GFP-C3orf14_KAN361-5_5.tif:0009-0374	0.618	102.932	0	321	30.568	38.303	0.883	63.656	6073	1.199	0.834	0.874	2.20125
362	GFP-C3orf14_KAN361-5_5.tif:0010-0397	0.503	54.729	0	113	100.658	40.647	0.924	27.536	2627	1.189	0.841	0.881	0.952197
363	GFP-C3orf14_KAN361-5_5.tif:0011-0401	0.66	112.492	7	338	131.57	41.049	0.877	74.285	7087	1.104	0.906	0.834	2.56879
364	GFP-C3orf14_KAN361-5_5.tif:0012-0460	0.818	113.487	0	462	33.111	47.1	0.846	92.785	8852	1.342	0.745	0.857	3.20855
365	GFP-C3orf14_KAN361-5_5.tif:0013-0576	0.839	85.4	0	371	70.987	58.929	0.911	71.612	6832	1.455	0.687	0.899	2.47637
366	GFP-C3orf14_KAN361-5_5.tif:0014-0649	0.346	64.485	14	147	122.837	66.524	0.892	22.305	2128	1.144	0.874	0.835	0.771327
367	GFP-C3orf14_KAN361-5_5.tif:0015-0668	0.765	130.151	0	458	40.148	68.355	0.862	99.588	9501	1.152	0.868	0.849	3.44379
368	GFP-C3orf14_KAN361-5_5.tif:0016-0675	0.629	28.367	0	83	86.862	69.09	0.959	17.84	1702	1.12	0.893	0.882	0.616916
369	GFP-C3orf14_KAN361-5_5.tif:0017-0702	0.639	79.246	0	427	25.329	71.815	0.799	50.669	4834	1.04	0.961	0.83	1.75216
370	GFP-C3orf14_KAN361-5_5.tif:0018-0818	0.398	159.079	105	233	139.486	83.796	0.924	63.363	6045	1.62	0.617	0.916	2.1911
371	GFP-C3orf14_KAN361-5_5.tif:0019-0838	0.566	125.593	5	378	118.743	85.744	0.878	71.088	6782	1.274	0.785	0.878	2.45824
372	GFP-C3orf14_KAN361-5_5.tif:0020-0924	0.577	72.782	0	296	88.765	94.703	0.823	41.959	4003	1.229	0.814	0.84	1.45095
373	GFP-C3orf14_KAN361-5_5.tif:0021-0998	0.618	64.78	0	263	59.646	102.241	0.883	40.062	3822	1.048	0.955	0.861	1.38534
374	GFP-C3orf14_KAN361-5_6.tif:0001-0047	0.44	27.143	0	108	60.785	4.861	0.793	11.949	1140	1.807	0.553	0.824	0.413211
375	GFP-C3orf14_KAN361-5_6.tif:0002-0179	0.734	139.671	0	621	46.914	18.303	0.87	102.481	9777	1.301	0.769	0.864	3.54383
376	GFP-C3orf14_KAN361-5_6.tif:0003-0215	0.671	105.734	0	463	110.818	22.055	0.871	70.931	6767	1.249	0.801	0.877	2.4528
377	GFP-C3orf14_KAN361-5_6.tif:0004-0249	0.335	441	121	1195	103.478	25.48	1	147.92	14112	1.108	0.903	0.955	5.11511
378	GFP-C3orf14_KAN361-5_6.tif:0005-0414	0.87	88.06	0	357	57.514	42.412	0.753	76.612	7309	1.945	0.514	0.865	2.64926
379	GFP-C3orf14_KAN361-5_6.tif:0006-0426	0.566	41.926	0	120	131.262	43.69	0.857	23.731	2264	1.746	0.573	0.915	0.820622
380	GFP-C3orf14_KAN361-5_6.tif:0007-0516	0.608	54.931	0	149	87.174	52.857	0.92	33.395	3186	1.035	0.966	0.906	1.15482
381	GFP-C3orf14_KAN361-5_6.tif:0008-0646	0.681	82.277	0	233	64.027	66.148	0.885	56.057	5348	1.149	0.87	0.884	1.93847
382	GFP-C3orf14_KAN361-5_6.tif:0009-0667	0.744	122.197	0	483	116.951	68.325	0.916	90.941	8676	1.202	0.832	0.887	3.14475
383	GFP-C3orf14_KAN361-5_6.tif:0010-0751	0.577	87.309	0	291	11.62	76.882	0.843	50.334	4802	1.106	0.904	0.821	1.74056
384	GFP-C3orf14_KAN361-5_6.tif:0011-0808	0.734	36.057	0	206	50.012	82.771	0.889	26.456	2524	1.146	0.873	0.864	0.914863
385	GFP-C3orf14_KAN361-5_6.tif:0012-0861	0.765	99.192	0	357	132.863	88.194	0.803	75.899	7241	2.166	0.462	0.901	2.62461
386	GFP-C3orf14_KAN361-5_6.tif:0013-0930	0.713	92.794	0	288	96.137	95.225	0.926	66.141	6310	1.257	0.796	0.889	2.28716
387	GFP-C3orf14_KAN361-5_6.tif:0014-0959	0.608	81	0	225	132.015	98.259	0.868	49.244	4698	1.264	0.791	0.872	1.70286
388	GFP-C3orf14_KAN361-5_6.tif:0015-0988	0.524	84.5	0	276	52.824	101.159	0.681	44.286	4225	1.843	0.543	0.806	1.53142
										5672.36				2.05604

## Sheet: IF condition
Exp. number	Cell line	Gene induced	Culture condition, fixation condition	rabbit-Alexa488	mouse IgG1-Alexa568	mouse IgG2b-Alexa647	Nuclear stain	Date	Replicate
KAN361-1	RPE-BFP-Cas9pMCB306(pool)	LAPC-C3orf14 (minimal CMV)	Fixed in 4% PFA/serum starvation for 24 hours	chicken anti GFP, Invitrogen, 1:1000	CEP170, Invitrogen, 41-3200, 1:1000	Ac-Tub, 6B-11, SIGMA, 1:2000	DAPI
KAN361-2	RPE-BFP-Cas9 CEP89KO#2 (pool)	LAPC-C3orf14 (minimal CMV)	Fixed in 4% PFA/serum starvation for 24 hours	chicken anti GFP, Invitrogen, 1:1000	CEP170, Invitrogen, 41-3200, 1:1000	Ac-Tub, 6B-11, SIGMA, 1:2000	DAPI
KAN361-3	RPE-BFP-Cas9 CEP89KO#3 (pool)	LAPC-C3orf14 (minimal CMV)	Fixed in 4% PFA/serum starvation for 24 hours	chicken anti GFP, Invitrogen, 1:1000	CEP170, Invitrogen, 41-3200, 1:1000	Ac-Tub, 6B-11, SIGMA, 1:2000	DAPI
KAN361-4	RPE-BFP-Cas9 CEP89KO#7 (pool)	LAPC-C3orf14 (minimal CMV)	Fixed in 4% PFA/serum starvation for 24 hours	chicken anti GFP, Invitrogen, 1:1000	CEP170, Invitrogen, 41-3200, 1:1000	Ac-Tub, 6B-11, SIGMA, 1:2000	DAPI
KAN361-5	RPE-BFP-Cas9 NCS1 KO (pool)	LAPC-C3orf14 (minimal CMV)	Fixed in 4% PFA/serum starvation for 24 hours	chicken anti GFP, Invitrogen, 1:1000	CEP170, Invitrogen, 41-3200, 1:1000	Ac-Tub, 6B-11, SIGMA, 1:2000	DAPI

## Sheet: After ROUT
sgGFP	CEP89 KO	NCS1 KO
0.470843	0.0717682	2.40786
2.65941	0.37044	1.8232
0.608942	0.126863	3.03239
1.34873	0.107652	2.758
0.931537	1.37012	1.90294
0.747042	0.166734	2.07004
0.513614	0.287435	2.19545
1.56948	0.0728556	4.71459
0.62779	0.193557	1.58542
1.24217	0.193557	1.89098
0.292147	0.0427709	1.84386
0.636852	0.36609	0.895653
0.428797	0.652076	3.0777
0.472293	0.164922	1.34257
0.18957	2.96606	1.77681
0.406686	0.226179	1.80145
8.47988	0.132662	0.860856
0.105478	0.215305	2.01495
1.34656	0.268587	1.84133
0.557472	0.156223	2.42055
1.98631	0.2617	3.73593
1.64596	0.112002	0.394363
0.0656063	0.0971408	2.7957
0.857956	0.0946035	1.48937
1.55969	0.236328	2.33283
1.91636	0.0561822	1.52707
4.95418	0.0289972	0.218204
1.24688	0.274749	3.38253
0.624166	0.300122	0.778939
1.29328	0.119976	2.81817
0.181958	0.0619816	1.53395
0.21023	0.242127	2.29803
0.196094	0.0964158	3.69715
1.87503	0.809748	2.5311
0.0826422	0.223279	0.34253
0.0964158	0.241765	1.1762
0.785825	0.151148	0.667662
0.215305	0.405599	0.894203
0.168184	0.298309	1.40274
0.106202	0.791625	0.437134
1.40782	0.108377	0.432421
1.46327	0.156948	1.74817
1.54302	0.07938	3.53585
0.560734	0.140637	3.17302
1.01744	0.509264	2.27882
0.484254	0.280548	2.45534
0.125413	0.0862668	3.54201
0.320057	0.125413	4.30682
1.41507	0.166372	3.61016
0.243214	0.360291	1.15337
0.947848	0.337093	3.22594
0.173259	0.227266	1.87358
0.308096	0.13665	1.66589
0.962346	0.510714	0.744504
0.276199	0.580307	1.8841
0.0344342	0.584657	3.575
0.256626	0.150423	2.43251
1.12799	0.73943	1.22876
1.30886	0.247202	2.24257
2.25309	0.215667	2.37198
1.38969	0.364278	2.60867
1.44769	0.390375	1.93303
1.1472	0.0768427	2.76489
0.798512	0.330569	0.146074
0.416473	0.214217	2.20125
0.799962	0.226541	0.952197
1.20701	0.178333	2.56879
0.860856	0.224004	3.20855
	0.084092	2.47637
	0.264237	0.771327
	0.124326	3.44379
		0.616916
		1.75216
		2.1911
		2.45824
		1.45095
		1.38534
		0.413211
		3.54383
		2.4528
		5.11511
		2.64926
		0.820622
		1.15482
		1.93847
		3.14475
		1.74056
		0.914863
		2.62461
		2.28716
		1.70286
		1.53142
