# Supplementary material for: Myristoylated Neuronal Calcium Sensor-1 captures the preciliary vesicle at distal appendages
Source: eLife. 2025 Jan 30;14:e85998. doi: 10.7554/eLife.85998 (PMC11984960; doi:10.7554/eLife.85998)
Supplement: Figure 2—figure supplement 4—source data 1. [file elife-85998-fig2-figsupp4-data1.xlsx]

## Sheet: RawData_1st replicate
	Label	Area	Mean	Min	Max	X	Y	Circ	IntDen	RawIntDen	AR	Round	Solidity
1	TTBK2_KAN488-1_1.tif:0001-0257	1.174	113.982	0	657	56.968	26.331	0.796	133.811	12766	1.763	0.567	0.878	1.18033
2	TTBK2_KAN488-1_1.tif:0002-0333	1.509	130.132	0	905	120.795	34.015	0.841	196.42	18739	1.554	0.644	0.941	1.73258
3	TTBK2_KAN488-1_1.tif:0003-0874	1.153	117.527	0	547	106.234	89.552	0.926	135.509	12928	1.241	0.806	0.917	1.1953
4	CEP170_KAN488-1_1.tif:0001-0056	0.692	115.167	12	319	21.163	5.665	0.846	79.673	7601	1.339	0.747	0.923	0.702777
5	CEP170_KAN488-1_1.tif:0002-0148	0.975	132.688	0	379	111.54	15.263	0.895	129.346	12340	1.287	0.777	0.939	1.14094
6	CEP170_KAN488-1_1.tif:0003-0257	1.174	74.384	0	215	56.968	26.331	0.796	87.324	8331	1.763	0.567	0.878	0.770272
7	CEP170_KAN488-1_1.tif:0004-0333	1.509	124.153	0	435	120.795	34.015	0.841	187.395	17878	1.554	0.644	0.941	1.65297
8	CEP170_KAN488-1_1.tif:0005-0473	0.891	112.871	2	294	37.994	48.498	0.935	100.563	9594	1.438	0.695	0.909	0.887047
9	CEP170_KAN488-1_1.tif:0006-0492	1.006	140.021	0	399	99.575	50.365	0.911	140.897	13442	1.298	0.77	0.937	1.24283
10	CEP170_KAN488-1_1.tif:0007-0742	0.912	97.759	3	231	27.476	76.053	0.894	89.148	8505	1.16	0.862	0.921	0.78636
11	CEP170_KAN488-1_1.tif:0008-0781	0.975	142.075	3	411	67.941	80.044	0.924	138.497	13213	1.161	0.862	0.944	1.22165
12	CEP170_KAN488-1_1.tif:0009-0874	1.153	120.273	0	344	106.234	89.552	0.926	138.675	13230	1.241	0.806	0.917	1.22323
13	TTBK2_KAN488-1_1.tif:0001-0056	0.692	61.576	0	186	21.163	5.665	0.846	42.598	4064	1.339	0.747	0.923	0.375751
14	TTBK2_KAN488-1_1.tif:0002-0148	0.975	141.462	0	770	111.54	15.263	0.895	137.899	13156	1.287	0.777	0.939	1.21638
15	TTBK2_KAN488-1_1.tif:0003-0257	1.174	113.982	0	657	56.968	26.331	0.796	133.811	12766	1.763	0.567	0.878	1.18033
16	TTBK2_KAN488-1_1.tif:0004-0333	1.509	130.132	0	905	120.795	34.015	0.841	196.42	18739	1.554	0.644	0.941	1.73258
17	TTBK2_KAN488-1_1.tif:0005-0473	0.891	35.2	0	113	37.994	48.498	0.935	31.362	2992	1.438	0.695	0.909	0.276636
18	TTBK2_KAN488-1_1.tif:0006-0492	1.006	150.021	0	587	99.575	50.365	0.911	150.96	14402	1.298	0.77	0.937	1.33159
19	TTBK2_KAN488-1_1.tif:0007-0742	0.912	149.678	0	774	27.476	76.053	0.894	136.495	13022	1.16	0.862	0.921	1.20399
20	TTBK2_KAN488-1_1.tif:0008-0781	0.975	62.989	0	178	67.941	80.044	0.924	61.403	5858	1.161	0.862	0.944	0.541622
21	TTBK2_KAN488-1_1.tif:0009-0874	1.153	117.527	0	547	106.234	89.552	0.926	135.509	12928	1.241	0.806	0.917	1.1953
22	TTBK2_KAN488-1_2.tif:0001-0187	1.258	125.883	0	754	41.799	19.133	0.786	158.339	15106	1.423	0.703	0.873	1.39668
23	TTBK2_KAN488-1_2.tif:0002-0297	0.912	167.816	6	784	91.716	30.443	0.865	153.035	14600	1.327	0.754	0.93	1.34989
24	TTBK2_KAN488-1_2.tif:0003-0399	1.153	51.773	0	311	134.091	40.894	0.873	59.694	5695	1.489	0.671	0.917	0.526551
25	TTBK2_KAN488-1_2.tif:0004-0591	1.195	109.544	0	638	32.56	60.538	0.932	130.897	12488	1.163	0.86	0.938	1.15462
26	TTBK2_KAN488-1_2.tif:0005-0742	1.426	119.654	0	895	66.341	76.025	0.836	170.571	16273	1.693	0.591	0.907	1.50458
27	TTBK2_KAN488-1_2.tif:0006-0789	0.88	146.167	0	729	133.523	80.747	0.906	128.696	12278	1.053	0.95	0.933	1.13521
28	TTBK2_KAN488-1_2.tif:0007-0843	1.101	103.371	0	482	108.112	86.394	0.843	113.77	10854	1.176	0.85	0.897	1.00354
29	TTBK2_KAN488-1_3.tif:0001-0117	1.593	71.079	0	490	117.688	12.104	0.728	113.246	10804	1.45	0.689	0.831	0.998922
30	TTBK2_KAN488-1_3.tif:0002-0262	0.891	40.694	0	317	60.215	26.844	0.949	36.257	3459	1.087	0.92	0.934	0.319814
31	TTBK2_KAN488-1_3.tif:0003-0333	1.09	42.51	0	250	35.609	34.093	0.932	46.34	4421	1.364	0.733	0.912	0.408759
32	TTBK2_KAN488-1_3.tif:0004-0427	1.247	116.471	0	756	75.939	43.723	0.842	145.279	13860	1.542	0.649	0.922	1.28147
33	TTBK2_KAN488-1_3.tif:0005-0434	1.059	99.604	0	601	128.304	44.473	0.9	105.448	10060	1.279	0.782	0.922	0.930133
34	TTBK2_KAN488-1_3.tif:0006-0483	1.205	90.939	0	434	11.683	49.459	0.861	109.619	10458	1.384	0.723	0.924	0.966931
35	TTBK2_KAN488-1_3.tif:0007-0538	0.839	177.188	0	783	115.647	55.168	0.862	148.58	14175	1.349	0.741	0.914	1.3106
36	TTBK2_KAN488-1_3.tif:0008-0648	1.122	70.561	0	359	45.276	66.335	0.971	79.138	7550	1.19	0.84	0.939	0.698062
37	TTBK2_KAN488-1_3.tif:0009-0683	1.31	95.768	0	711	90.076	69.965	0.899	125.478	11971	1.421	0.704	0.933	1.10682
38	TTBK2_KAN488-1_3.tif:0010-0854	1.069	135.794	0	664	8.644	87.445	0.87	145.184	13851	1.484	0.674	0.903	1.28064
39	TTBK2_KAN488-1_3.tif:0011-0927	1.059	22.05	0	179	69.545	94.923	0.888	23.343	2227	1.293	0.774	0.906	0.205905
40	TTBK2_KAN488-1_3.tif:0012-1025	1.038	78.323	0	346	36.054	105.001	0.898	81.276	7754	1.345	0.743	0.912	0.716923
41	TTBK2_KAN488-1_3.tif:0013-1034	0.65	60.371	0	253	84.314	105.892	0.795	39.234	3743	1.992	0.502	0.947	0.346072
42	TTBK2_KAN488-1_4.tif:0001-0122	1.09	53.385	0	199	56.323	12.551	0.944	58.195	5552	1.256	0.796	0.924	0.51333
43	TTBK2_KAN488-1_4.tif:0002-0173	1.195	73.57	0	388	99.274	17.738	0.811	87.911	8387	1.334	0.75	0.874	0.775449
44	TTBK2_KAN488-1_4.tif:0003-0215	1.373	118.603	0	807	37.063	22.085	0.882	162.857	15537	1.457	0.686	0.923	1.43653
45	TTBK2_KAN488-1_4.tif:0004-0371	1.53	101.308	0	794	114.321	37.99	0.865	155.037	14791	1.486	0.673	0.896	1.36755
46	TTBK2_KAN488-1_4.tif:0005-0511	1.153	40.109	0	407	67.115	52.373	0.938	46.246	4412	1.127	0.888	0.936	0.407927
47	TTBK2_KAN488-1_4.tif:0006-0571	1.122	47.85	0	323	34.547	58.42	0.941	53.667	5120	1.161	0.861	0.934	0.473388
48	TTBK2_KAN488-1_4.tif:0007-0597	1.205	51.913	0	477	138.184	61.049	0.851	62.577	5970	1.352	0.739	0.891	0.551977
49	TTBK2_KAN488-1_4.tif:0008-0673	0.901	73.221	0	418	8.993	68.964	0.927	66.004	6297	1.298	0.77	0.94	0.582211
50	TTBK2_KAN488-1_4.tif:0009-0685	1.3	98.613	0	559	97.479	70.244	0.844	128.172	12228	1.44	0.694	0.919	1.13058
51	TTBK2_KAN488-1_4.tif:0010-0709	0.943	80.767	0	413	45.567	72.632	0.925	76.193	7269	1.255	0.797	0.928	0.672081
52	TTBK2_KAN488-1_4.tif:0011-0757	1.101	33.543	0	169	73.951	77.576	0.799	36.917	3522	1.384	0.722	0.875	0.325639
53	TTBK2_KAN488-1_4.tif:0012-0852	1.132	252.509	0	1658	121.147	87.291	0.921	285.851	27271	1.158	0.864	0.927	2.52144
54	TTBK2_KAN488-1_4.tif:0013-1025	1.426	113.522	0	604	136.082	104.993	0.836	161.829	15439	1.615	0.619	0.898	1.42747
55	TTBK2_KAN488-1_5.tif:0001-0046	1.027	117.102	0	587	107.187	4.703	0.93	120.29	11476	1.241	0.806	0.92	1.06105
56	TTBK2_KAN488-1_5.tif:0002-0072	0.629	187.35	0	497	80.475	7.395	0.952	117.827	11241	1.217	0.821	0.93	1.03933
57	TTBK2_KAN488-1_5.tif:0003-0159	1.226	201.231	0	1128	50.851	16.212	0.901	246.785	23544	1.321	0.757	0.944	2.17684
58	TTBK2_KAN488-1_5.tif:0004-0184	0.629	140.6	7	469	85.138	18.836	0.914	88.425	8436	1.114	0.897	0.916	0.77998
59	TTBK2_KAN488-1_5.tif:0005-0241	1.048	73.59	0	379	13.23	24.758	0.771	77.136	7359	1.914	0.522	0.877	0.680402
60	TTBK2_KAN488-1_5.tif:0006-0312	1.132	111.898	0	557	119.706	31.959	0.894	126.673	12085	1.235	0.81	0.915	1.11736
61	TTBK2_KAN488-1_5.tif:0007-0419	1.111	114.179	0	653	73.731	42.916	0.904	126.862	12103	1.244	0.804	0.922	1.11903
62	TTBK2_KAN488-1_5.tif:0008-0468	0.734	55.3	0	297	43.981	47.917	0.917	40.575	3871	1.424	0.702	0.909	0.357907
63	TTBK2_KAN488-1_5.tif:0009-0547	0.744	140.366	0	487	111.929	56.041	0.896	104.462	9966	1.416	0.706	0.928	0.921441
64	TTBK2_KAN488-1_5.tif:0010-0572	1.174	142.446	0	868	128.812	58.564	0.985	167.228	15954	1.098	0.911	0.945	1.47508
65	TTBK2_KAN488-1_5.tif:0011-0768	1.038	75.192	0	616	3.744	78.638	0.927	78.027	7444	1.337	0.748	0.908	0.688261
66	TTBK2_KAN488-1_5.tif:0012-0899	0.933	87.258	0	316	100.358	92.042	0.979	81.402	7766	1.113	0.898	0.927	0.718033
67	TTBK2_KAN488-1_5.tif:0013-0949	1.216	170.603	0	948	69.136	97.16	0.92	207.436	19790	1.261	0.793	0.928	1.82975
68	TTBK2_KAN488-1_6.tif:0001-0006	0.629	10.533	0	83	37.553	0.623	0.914	6.625	632	1.464	0.683	0.952	0.0584338
69	TTBK2_KAN488-1_6.tif:0002-0049	1.184	100.681	0	777	36.048	4.983	0.826	119.252	11377	1.121	0.892	0.89	1.0519
70	TTBK2_KAN488-1_6.tif:0003-0060	1.405	84.246	0	432	98.88	6.095	0.845	118.33	11289	1.385	0.722	0.899	1.04376
71	TTBK2_KAN488-1_6.tif:0004-0093	0.797	70.158	0	544	130.262	9.494	0.944	55.889	5332	1.143	0.875	0.899	0.492989
72	TTBK2_KAN488-1_6.tif:0005-0212	1.363	87.992	0	640	12.803	21.726	0.924	119.902	11439	1.116	0.896	0.915	1.05763
73	TTBK2_KAN488-1_6.tif:0006-0308	1.174	97.705	0	537	103.854	31.582	0.915	114.703	10943	1.229	0.813	0.911	1.01177
74	TTBK2_KAN488-1_6.tif:0007-0393	1.059	149.02	0	792	125.099	40.26	0.929	157.762	15051	1.237	0.808	0.935	1.39159
75	TTBK2_KAN488-1_6.tif:0008-0428	1.08	66.563	0	444	7.236	43.833	0.906	71.864	6856	1.123	0.891	0.907	0.633896
76	TTBK2_KAN488-1_6.tif:0009-0505	1.027	104.765	0	410	71.752	51.68	0.943	107.617	10267	1.141	0.876	0.956	0.949271
77	TTBK2_KAN488-1_6.tif:0010-0581	1.069	116.245	0	642	140.484	59.555	0.809	124.283	11857	1.569	0.638	0.903	1.09628
78	TTBK2_KAN488-1_6.tif:0011-0611	1.321	118.222	0	797	48.571	62.48	0.871	156.138	14896	1.439	0.695	0.903	1.37726
79	TTBK2_KAN488-1_6.tif:0012-0710	1.289	76.862	0	506	16.817	72.648	0.851	99.095	9454	1.213	0.824	0.875	0.874103
80	TTBK2_KAN488-1_6.tif:0013-0741	1.363	124.877	0	735	116.89	75.877	0.935	170.163	16234	1.051	0.952	0.929	1.50097
81	TTBK2_KAN488-1_6.tif:0014-0886	1.258	123.017	0	724	94.731	90.702	0.888	154.733	14762	1.398	0.715	0.92	1.36487
82	TTBK2_KAN488-1_6.tif:0015-0946	1.342	112.789	0	722	48.323	96.856	0.885	151.327	14437	1.212	0.825	0.895	1.33482
83	TTBK2_KAN488-1_6.tif:0016-0955	1.153	17.482	0	218	5.08	97.826	0.899	20.157	1923	1.426	0.701	0.924	0.177798
										10815.7				1
84	TTBK2_KAN488-2_1.tif:0001-0026	0.849	52.16	0	349	79.28	2.7	0.904	44.286	4225	1.282	0.78	0.915	0.390637
85	TTBK2_KAN488-2_1.tif:0002-0079	0.755	25.833	0	107	139.922	8.078	0.98	19.496	1860	1.184	0.845	0.923	0.171973
86	TTBK2_KAN488-2_1.tif:0003-0090	1.3	61.685	0	435	62.262	9.234	0.917	80.176	7649	1.082	0.924	0.919	0.707215
87	TTBK2_KAN488-2_1.tif:0004-0161	0.891	77.553	0	364	17.327	16.539	0.968	69.096	6592	1.073	0.932	0.909	0.609486
88	TTBK2_KAN488-2_1.tif:0005-0185	1.153	76.882	0	459	62.536	18.991	0.873	88.645	8457	1.524	0.656	0.917	0.781922
89	TTBK2_KAN488-2_1.tif:0006-0227	1.226	168.65	0	1051	120.582	23.269	0.876	206.828	19732	1.172	0.854	0.918	1.82439
90	TTBK2_KAN488-2_1.tif:0007-0410	1.069	113.049	0	652	85.643	41.929	0.834	120.866	11531	1.617	0.619	0.903	1.06614
91	TTBK2_KAN488-2_1.tif:0008-0518	0.975	75.828	0	300	5.958	53.031	1	73.918	7052	1.191	0.84	0.93	0.652017
92	TTBK2_KAN488-2_1.tif:0009-0528	0.954	54.879	0	218	36.981	54.094	0.935	52.346	4994	1.309	0.764	0.938	0.461738
93	TTBK2_KAN488-2_1.tif:0010-0735	0.933	47.18	0	273	138.098	75.205	0.965	44.013	4199	1.136	0.88	0.913	0.388233
94	TTBK2_KAN488-2_1.tif:0011-0748	1.551	79	0	334	88.231	76.775	0.657	122.554	11692	2.021	0.495	0.825	1.08102
95	TTBK2_KAN488-2_1.tif:0012-0774	1.111	245.594	0	1536	114.959	79.294	0.962	272.874	26033	1.025	0.976	0.922	2.40697
96	TTBK2_KAN488-2_1.tif:0013-0795	1.342	158.008	0	805	58.911	81.464	0.852	211.996	20225	1.256	0.796	0.883	1.86997
97	TTBK2_KAN488-2_1.tif:0014-0860	1.247	83.563	0	349	128.815	88.069	0.906	104.232	9944	1.313	0.761	0.919	0.919407
98	TTBK2_KAN488-2_1.tif:0015-0967	0.943	91.6	0	319	40.452	99.08	0.957	86.412	8244	1.156	0.865	0.928	0.762228
99	TTBK2_KAN488-2_2.tif:0001-0016	1.625	102.323	0	641	73.608	1.697	0.824	166.242	15860	1.161	0.861	0.886	1.46639
100	TTBK2_KAN488-2_2.tif:0002-0145	0.912	162.115	0	793	7.824	14.909	0.894	147.836	14104	1.142	0.875	0.921	1.30403
101	TTBK2_KAN488-2_2.tif:0003-0180	1.111	135.802	0	844	73.987	18.463	0.962	150.886	14395	1.252	0.799	0.93	1.33094
102	TTBK2_KAN488-2_2.tif:0004-0250	1.132	137.954	0	761	107.717	25.546	0.938	156.169	14899	1.03	0.971	0.904	1.37754
103	TTBK2_KAN488-2_2.tif:0005-0336	1.038	172.798	0	857	133.827	34.428	0.952	179.313	17107	1.119	0.894	0.961	1.58169
104	TTBK2_KAN488-2_2.tif:0006-0499	1.247	89.059	0	583	30.993	51.126	0.933	111.087	10598	1.302	0.768	0.912	0.979875
105	TTBK2_KAN488-2_2.tif:0007-0502	1.289	89.642	0	699	62.667	51.501	0.86	115.573	11026	1.187	0.842	0.901	1.01945
106	TTBK2_KAN488-2_2.tif:0008-0765	1.614	141.208	0	932	116.235	78.321	0.847	227.939	21746	1.686	0.593	0.936	2.0106
107	TTBK2_KAN488-2_2.tif:0009-0803	1.457	92.403	0	606	52.847	82.189	0.877	134.629	12844	1.486	0.673	0.917	1.18754
108	TTBK2_KAN488-2_2.tif:0010-0859	1.635	113.577	0	794	133.151	87.967	0.809	185.718	17718	1.79	0.559	0.915	1.63818
109	TTBK2_KAN488-2_2.tif:0011-0902	1.216	72.155	0	431	6.323	92.388	0.92	87.733	8370	1.42	0.704	0.939	0.773878
110	TTBK2_KAN488-2_2.tif:0012-1020	1.237	83.017	0	544	82.326	104.51	0.883	102.68	9796	1.261	0.793	0.937	0.905724
111	TTBK2_KAN488-2_3.tif:0001-0027	1.006	61.76	0	316	129.93	2.813	0.894	62.147	5929	1.295	0.772	0.946	0.548186
112	TTBK2_KAN488-2_3.tif:0002-0042	1.405	137.142	0	948	44.835	4.37	0.794	192.625	18377	1.696	0.59	0.884	1.69911
113	TTBK2_KAN488-2_3.tif:0003-0054	1.352	92.217	0	653	139.817	5.474	0.823	124.692	11896	1.585	0.631	0.912	1.09989
114	TTBK2_KAN488-2_3.tif:0004-0161	1.006	30.594	0	280	87.702	16.445	0.804	30.785	2937	1.794	0.557	0.937	0.271551
115	TTBK2_KAN488-2_3.tif:0005-0251	1.006	113.51	0	476	4.368	25.747	0.941	114.221	10897	1.278	0.782	0.928	1.00752
116	TTBK2_KAN488-2_3.tif:0006-0370	1.174	65.107	0	486	101.198	37.898	0.806	76.434	7292	1.387	0.721	0.865	0.674207
117	TTBK2_KAN488-2_3.tif:0007-0409	1.394	64.737	0	559	29.592	41.928	0.862	90.249	8610	1.303	0.767	0.896	0.796068
118	TTBK2_KAN488-2_3.tif:0008-0555	1.551	176.581	0	1255	130.308	56.832	0.826	273.933	26134	1.609	0.622	0.892	2.41631
119	TTBK2_KAN488-2_3.tif:0009-0676	1.027	146.99	0	713	59.29	69.193	0.961	150.991	14405	1.143	0.875	0.933	1.33186
120	TTBK2_KAN488-2_3.tif:0010-0683	1.132	225.843	0	1113	98.718	69.967	0.921	255.663	24391	1.024	0.977	0.927	2.25516
121	TTBK2_KAN488-2_3.tif:0011-0721	1.268	82.397	0	456	30.969	73.758	0.932	104.504	9970	1.196	0.836	0.949	0.921811
122	TTBK2_KAN488-2_3.tif:0012-0870	1.866	117.129	0	719	120.578	88.954	0.692	218.536	20849	1.73	0.578	0.86	1.92767
123	TTBK2_KAN488-2_3.tif:0013-0971	1.174	126.616	0	665	4.911	99.409	0.889	148.643	14181	1.448	0.69	0.922	1.31115
124	TTBK2_KAN488-2_3.tif:0014-0976	1.289	85.285	0	522	43.085	100.037	0.785	109.955	10490	1.305	0.766	0.898	0.96989
125	TTBK2_KAN488-2_3.tif:0015-0979	1.237	80.559	0	430	88.873	100.293	0.925	99.641	9506	1.238	0.808	0.918	0.878911
126	TTBK2_KAN488-2_4.tif:0001-0092	1.457	91.54	0	483	64.069	9.46	0.833	133.371	12724	1.595	0.627	0.914	1.17644
127	TTBK2_KAN488-2_4.tif:0002-0150	1.625	87.852	0	598	99.728	15.425	0.804	142.731	13617	1.535	0.652	0.906	1.25901
128	TTBK2_KAN488-2_4.tif:0003-0261	1.342	136.93	0	764	56.485	26.721	0.687	183.716	17527	1.76	0.568	0.842	1.62052
129	TTBK2_KAN488-2_4.tif:0004-0309	1.405	112.769	0	717	24.286	31.701	0.763	158.391	15111	1.645	0.608	0.918	1.39714
130	TTBK2_KAN488-2_4.tif:0005-0357	1.174	141.955	0	922	66.92	36.523	0.904	166.651	15899	1.173	0.852	0.9	1.47
131	TTBK2_KAN488-2_4.tif:0006-0613	1.069	92.294	0	314	87.156	62.807	0.909	98.676	9414	1.198	0.835	0.949	0.870404
132	TTBK2_KAN488-2_4.tif:0007-0693	1.352	93.581	0	567	24.134	70.939	0.868	126.537	12072	1.275	0.784	0.89	1.11616
133	TTBK2_KAN488-2_4.tif:0008-0755	1.415	128.452	0	668	99.67	77.271	0.83	181.766	17341	1.618	0.618	0.903	1.60332
134	TTBK2_KAN488-2_4.tif:0009-0884	1.111	163.33	0	926	128.978	90.501	0.877	181.472	17313	1.449	0.69	0.934	1.60073
135	TTBK2_KAN488-2_4.tif:0010-1024	1.268	145.942	0	1025	2.331	104.894	0.814	185.099	17659	1.556	0.643	0.886	1.63272
136	TTBK2_KAN488-2_5.tif:0001-0165	0.901	113.872	0	634	16.189	16.886	0.914	102.649	9793	1.298	0.771	0.91	0.905446
137	TTBK2_KAN488-2_5.tif:0002-0175	1.384	228.258	0	1687	46.226	17.811	0.878	315.818	30130	1.222	0.818	0.907	2.78577
138	TTBK2_KAN488-2_5.tif:0003-0204	0.975	56.376	0	375	70	20.959	0.912	54.956	5243	1.098	0.911	0.903	0.48476
139	TTBK2_KAN488-2_5.tif:0004-0255	1.111	27.387	0	266	115.461	26.116	0.904	30.429	2903	1.275	0.784	0.922	0.268407
140	TTBK2_KAN488-2_5.tif:0005-0281	1.467	94.086	0	758	100.958	28.724	0.751	138.067	13172	2.086	0.479	0.903	1.21786
141	TTBK2_KAN488-2_5.tif:0006-0348	1.017	42.794	0	108	117.027	35.678	0.964	43.51	4151	1.152	0.868	0.946	0.383795
142	TTBK2_KAN488-2_5.tif:0007-0364	1.52	149.276	0	1261	133.855	37.211	0.86	226.88	21645	1.473	0.679	0.924	2.00126
143	TTBK2_KAN488-2_5.tif:0008-0505	0.943	85.911	0	264	128.316	51.723	0.925	81.046	7732	1.157	0.864	0.923	0.714889
144	TTBK2_KAN488-2_5.tif:0009-0529	1.205	53.809	0	323	32.472	54.285	0.753	64.862	6188	1.635	0.612	0.861	0.572133
145	TTBK2_KAN488-2_5.tif:0010-0667	1.3	68.702	0	506	117.234	68.292	0.892	89.295	8519	1.22	0.82	0.919	0.787654
146	TTBK2_KAN488-2_5.tif:0011-0696	1.373	160.687	0	1086	75.037	71.254	0.868	220.643	21050	1.352	0.74	0.942	1.94625
147	TTBK2_KAN488-2_5.tif:0012-0878	1.3	155.153	0	820	130.019	89.892	0.917	201.66	19239	1.177	0.85	0.919	1.77881
148	TTBK2_KAN488-2_5.tif:0013-0898	0.681	113.492	0	286	44.444	91.931	0.92	77.325	7377	1.264	0.791	0.884	0.682066
149	TTBK2_KAN488-2_5.tif:0014-0919	0.88	67.048	0	327	11.063	94.128	0.893	59.034	5632	1.228	0.814	0.903	0.520726
150	TTBK2_KAN488-2_5.tif:0015-0938	1.321	95.786	0	567	106.445	96.148	0.825	126.506	12069	1.599	0.625	0.926	1.11588
151	TTBK2_KAN488-2_5.tif:0016-1020	0.943	29.9	0	345	12.475	104.475	0.99	28.207	2691	1.071	0.934	0.928	0.248806
152	TTBK2_KAN488-2_6.tif:0001-0018	0.839	65.338	0	158	129.622	1.911	0.973	54.789	5227	1.25	0.8	0.964	0.483281
153	TTBK2_KAN488-2_6.tif:0002-0032	1.226	41.188	0	203	70.065	3.314	0.88	50.512	4819	1.149	0.87	0.893	0.445558
154	TTBK2_KAN488-2_6.tif:0003-0065	1.174	143.312	0	941	45.062	6.661	0.863	168.244	16051	1.528	0.654	0.911	1.48405
155	TTBK2_KAN488-2_6.tif:0004-0188	1.09	103.548	0	578	82.345	19.321	0.861	112.879	10769	1.412	0.708	0.908	0.995686
156	TTBK2_KAN488-2_6.tif:0005-0219	1.048	99.92	0	555	11.26	22.43	0.891	104.735	9992	1.421	0.704	0.943	0.923845
157	TTBK2_KAN488-2_6.tif:0006-0360	1.467	97.721	0	696	137.914	36.845	0.874	143.402	13681	1.426	0.701	0.895	1.26492
158	TTBK2_KAN488-2_6.tif:0007-0408	1.048	95.13	0	539	64.158	41.834	0.919	99.714	9513	1.391	0.719	0.939	0.879558
159	TTBK2_KAN488-2_6.tif:0008-0454	1.143	132.661	0	757	6.911	46.476	0.93	151.568	14460	1.294	0.773	0.936	1.33695
160	TTBK2_KAN488-2_6.tif:0009-0476	1.132	116.241	0	628	37.316	48.803	0.799	131.589	12554	1.911	0.523	0.893	1.16072
161	TTBK2_KAN488-2_6.tif:0010-0629	1.352	139.643	0	772	120.861	64.452	0.845	188.82	18014	1.575	0.635	0.905	1.66555
162	TTBK2_KAN488-2_6.tif:0011-0724	0.755	115.292	0	565	18.592	74.091	0.943	87.01	8301	1.127	0.887	0.917	0.767498
163	TTBK2_KAN488-2_6.tif:0012-0780	1.226	130.402	0	636	60.81	79.934	0.891	159.922	15257	1.233	0.811	0.914	1.41064
164	TTBK2_KAN488-2_6.tif:0013-0990	1.415	141.43	0	908	106.669	101.441	0.83	200.13	19093	1.555	0.643	0.9	1.76531
										12354.3				1.14226
165	TTBK2_KAN488-3_1.tif:0001-0067	1.132	128.898	0	545	108.839	6.902	0.95	145.918	13921	1.17	0.855	0.923	1.28711
166	TTBK2_KAN488-3_1.tif:0002-0072	1.08	126.427	0	516	135	7.368	0.965	136.495	13022	1.255	0.797	0.924	1.20399
167	TTBK2_KAN488-3_1.tif:0003-0123	1.174	111.679	0	490	23.646	12.607	0.955	131.107	12508	1.149	0.87	0.953	1.15647
168	TTBK2_KAN488-3_1.tif:0004-0157	0.975	60.731	0	426	94.811	16.078	0.943	59.202	5648	1.208	0.828	0.907	0.522206
169	TTBK2_KAN488-3_1.tif:0005-0248	1.08	125.689	0	737	60.445	25.467	0.965	135.698	12946	1.113	0.898	0.912	1.19697
170	TTBK2_KAN488-3_1.tif:0006-0260	0.912	127.563	0	690	121.442	26.615	0.938	116.328	11098	1.142	0.876	0.941	1.0261
171	TTBK2_KAN488-3_1.tif:0007-0413	0.807	42.818	0	152	23.814	42.283	0.937	34.559	3297	1.185	0.844	0.933	0.304836
172	TTBK2_KAN488-3_1.tif:0008-0423	1.048	57.59	0	199	30.643	43.361	0.981	60.365	5759	1.028	0.972	0.935	0.532469
173	TTBK2_KAN488-3_1.tif:0009-0563	1.027	51.388	0	391	33.811	57.655	0.889	52.787	5036	1.509	0.663	0.903	0.465621
174	TTBK2_KAN488-3_1.tif:0010-0620	1.006	41.771	0	152	68.005	63.502	0.929	42.032	4010	1.268	0.789	0.901	0.370759
175	TTBK2_KAN488-3_1.tif:0011-0646	1.216	76.241	0	274	129.878	66.114	0.894	92.702	8844	1.508	0.663	0.955	0.817703
176	TTBK2_KAN488-3_1.tif:0012-0663	1.321	160.563	0	1164	103.6	67.918	0.871	212.058	20231	1.315	0.76	0.894	1.87053
177	TTBK2_KAN488-3_1.tif:0013-0681	1.342	97.188	0	503	90.54	69.713	0.861	130.394	12440	1.417	0.706	0.924	1.15018
178	TTBK2_KAN488-3_1.tif:0014-0766	0.66	7.206	0	42	0.661	78.363	0.871	4.759	454	1.258	0.795	0.933	0.0419762
179	TTBK2_KAN488-3_1.tif:0015-0852	1.321	101.897	0	629	105.304	87.277	0.848	134.577	12839	1.427	0.701	0.903	1.18707
180	TTBK2_KAN488-3_1.tif:0016-0856	1.153	104.127	0	729	22.156	87.645	0.899	120.059	11454	1.278	0.783	0.905	1.05902
181	TTBK2_KAN488-3_1.tif:0017-0867	1.08	76.718	0	354	49.709	88.84	0.947	82.828	7902	1.191	0.84	0.936	0.730607
182	TTBK2_KAN488-3_2.tif:0001-0012	1.394	159.459	0	939	117.174	1.278	0.93	222.299	21208	1.155	0.866	0.95	1.96086
183	TTBK2_KAN488-3_2.tif:0002-0147	1.226	114.547	0	606	60.778	15.073	0.842	140.478	13402	1.571	0.636	0.897	1.23913
184	TTBK2_KAN488-3_2.tif:0003-0247	1.143	77.294	0	498	8.504	25.415	0.806	88.31	8425	1.356	0.738	0.886	0.778963
185	TTBK2_KAN488-3_2.tif:0004-0352	1.174	65.196	0	409	70.24	36.134	0.806	76.539	7302	1.747	0.573	0.903	0.675132
186	TTBK2_KAN488-3_2.tif:0005-0432	1.017	111.557	0	609	33.146	44.212	0.983	113.424	10821	1.231	0.812	0.933	1.00049
187	TTBK2_KAN488-3_2.tif:0006-0590	1.363	76.754	0	389	120.116	60.452	0.842	104.588	9978	1.211	0.826	0.872	0.922551
188	TTBK2_KAN488-3_2.tif:0007-0663	0.996	103.768	0	509	63.379	67.892	0.932	103.33	9858	1.218	0.821	0.909	0.911456
189	TTBK2_KAN488-3_2.tif:0008-0678	1.247	146.084	0	844	97.003	69.482	0.856	182.217	17384	1.138	0.879	0.902	1.6073
190	TTBK2_KAN488-3_2.tif:0009-0762	1.216	141.095	0	873	15.535	78.057	0.948	171.557	16367	1.222	0.818	0.924	1.51327
191	TTBK2_KAN488-3_2.tif:0010-0882	1.488	204.056	0	1311	120.569	90.258	0.842	303.722	28976	1.566	0.639	0.904	2.67908
192	TTBK2_KAN488-3_2.tif:0011-0952	1.31	72.896	0	432	46.621	97.421	0.819	95.511	9112	1.211	0.826	0.88	0.842482
193	TTBK2_KAN488-3_2.tif:0012-0954	0.964	60.457	0	259	141.721	97.668	0.927	58.3	5562	1.052	0.95	0.963	0.514254
194	TTBK2_KAN488-3_3.tif:0001-0106	0.901	141.581	0	808	75.371	10.873	0.896	127.627	12176	1.256	0.796	0.94	1.12577
195	TTBK2_KAN488-3_3.tif:0002-0297	1.132	137.222	0	770	126.748	30.435	0.867	155.341	14820	1.448	0.691	0.935	1.37024
196	TTBK2_KAN488-3_3.tif:0003-0379	0.839	70.562	0	329	15.197	38.836	0.893	59.17	5645	1.33	0.752	0.92	0.521928
197	TTBK2_KAN488-3_3.tif:0004-0385	0.765	44.603	0	245	81.065	39.48	0.936	34.129	3256	1.162	0.861	0.961	0.301045
198	TTBK2_KAN488-3_3.tif:0005-0503	1.373	142.969	0	951	86.529	51.579	0.858	196.315	18729	1.563	0.64	0.919	1.73166
199	TTBK2_KAN488-3_3.tif:0006-0566	1.111	169.311	0	717	28.377	57.982	0.932	188.118	17947	1.368	0.731	0.934	1.65935
200	TTBK2_KAN488-3_3.tif:0007-0569	1.184	178.389	0	949	132.854	58.238	0.856	211.293	20158	1.386	0.722	0.942	1.86378
201	TTBK2_KAN488-3_3.tif:0008-0648	1.09	156.702	0	906	98.037	66.423	0.987	170.823	16297	1.026	0.975	0.945	1.5068
202	TTBK2_KAN488-3_3.tif:0009-0704	0.901	118.035	0	487	4.906	72.068	0.994	106.401	10151	1.04	0.962	0.945	0.938546
203	TTBK2_KAN488-3_3.tif:0010-0808	1.436	121.285	0	760	138.156	82.729	0.912	174.167	16616	1.13	0.885	0.929	1.53629
204	TTBK2_KAN488-3_3.tif:0011-0900	1.195	120.368	0	517	37.358	92.154	0.878	143.832	13722	1.568	0.638	0.923	1.26872
205	TTBK2_KAN488-3_3.tif:0012-0977	1.3	107.218	0	706	9.351	100.054	0.892	139.356	13295	1.133	0.882	0.915	1.22924
206	TTBK2_KAN488-3_3.tif:0013-0978	1.027	127.888	0	812	112.017	100.107	0.901	131.369	12533	1.293	0.774	0.912	1.15878
207	TTBK2_KAN488-3_4.tif:0001-0077	1.08	93.903	0	573	7.996	7.947	0.89	101.381	9672	1.504	0.665	0.945	0.894259
208	TTBK2_KAN488-3_4.tif:0002-0134	1.163	107.586	0	450	76.913	13.738	0.947	125.174	11942	1.309	0.764	0.957	1.10414
209	TTBK2_KAN488-3_4.tif:0003-0204	1.268	168.851	0	713	40.923	20.895	0.895	214.155	20431	1.396	0.717	0.917	1.88902
210	TTBK2_KAN488-3_4.tif:0004-0208	0.828	70.823	0	295	1.739	21.394	0.947	58.646	5595	1.293	0.774	0.935	0.517305
211	TTBK2_KAN488-3_4.tif:0005-0525	1.143	124.367	0	893	58.422	53.751	0.865	142.092	13556	1.516	0.66	0.908	1.25337
212	TTBK2_KAN488-3_4.tif:0006-0528	1.562	121.765	0	992	140.504	54.022	0.792	190.172	18143	1.671	0.598	0.892	1.67747
213	TTBK2_KAN488-3_4.tif:0007-0617	1.006	108.625	0	411	108.254	63.139	0.894	109.305	10428	1.217	0.821	0.946	0.964157
214	TTBK2_KAN488-3_4.tif:0008-0746	1.027	37.031	0	177	8.739	76.423	0.918	38.039	3629	1.408	0.71	0.912	0.335532
215	TTBK2_KAN488-3_4.tif:0009-0815	1.614	97.662	0	849	70.408	83.359	0.847	157.647	15040	1.359	0.736	0.922	1.39058
216	TTBK2_KAN488-3_4.tif:0010-0845	1.101	140.829	0	591	94.938	86.554	0.896	154.995	14787	1.06	0.943	0.917	1.36718
217	TTBK2_KAN488-3_4.tif:0011-0871	1.006	70.292	0	442	24.037	89.128	0.762	70.732	6748	1.356	0.738	0.846	0.62391
218	TTBK2_KAN488-3_4.tif:0012-0916	1.321	142.476	0	863	126.919	93.869	0.736	188.17	17952	1.72	0.581	0.857	1.65982
219	TTBK2_KAN488-3_5.tif:0001-0076	0.933	34.787	0	249	74.504	7.853	0.915	32.452	3096	1.359	0.736	0.927	0.286252
220	TTBK2_KAN488-3_5.tif:0002-0155	1.184	140.15	0	880	37.488	15.908	0.896	166.001	15837	1.22	0.819	0.915	1.46427
221	TTBK2_KAN488-3_5.tif:0003-0314	1.069	47.294	0	348	124.355	32.153	0.886	50.564	4824	1.431	0.699	0.903	0.44602
222	TTBK2_KAN488-3_5.tif:0004-0387	0.807	69.779	0	233	67.668	39.626	0.951	56.319	5373	1.25	0.8	0.981	0.49678
223	TTBK2_KAN488-3_5.tif:0005-0402	1.184	139.761	0	621	101.326	41.208	0.923	165.54	15793	1.095	0.913	0.911	1.4602
224	TTBK2_KAN488-3_5.tif:0006-0487	1.122	173.701	0	981	19.863	49.837	0.924	194.816	18586	1.204	0.831	0.955	1.71843
225	TTBK2_KAN488-3_5.tif:0007-0606	1.467	174.15	0	1107	124.889	61.984	0.83	255.558	24381	1.554	0.643	0.903	2.25423
226	TTBK2_KAN488-3_5.tif:0008-0676	1.195	72.912	0	551	50.935	69.116	0.747	87.125	8312	1.199	0.834	0.838	0.768515
227	TTBK2_KAN488-3_5.tif:0009-0807	1.289	107.317	0	616	77.365	82.544	0.737	138.361	13200	1.788	0.559	0.86	1.22045
228	TTBK2_KAN488-3_5.tif:0010-0991	0.964	10.315	0	81	53.68	101.428	0.902	9.947	949	1.252	0.799	0.906	0.0877431
229	TTBK2_KAN488-3_6.tif:0001-0008	0.755	46.306	0	197	0.875	0.795	0.863	34.947	3334	1.232	0.812	0.873	0.308257
230	TTBK2_KAN488-3_6.tif:0002-0085	0.891	95.741	0	308	34.445	8.721	0.935	85.301	8138	1.152	0.868	0.899	0.752427
231	TTBK2_KAN488-3_6.tif:0003-0159	1.384	102.114	0	869	96.71	16.307	0.842	141.285	13479	1.494	0.669	0.907	1.24625
232	TTBK2_KAN488-3_6.tif:0004-0286	1.321	82.246	0	502	56.605	29.245	0.896	108.624	10363	1.228	0.814	0.906	0.958147
233	TTBK2_KAN488-3_6.tif:0005-0300	1.331	136.669	0	806	19.916	30.706	0.789	181.934	17357	1.769	0.565	0.901	1.6048
234	TTBK2_KAN488-3_6.tif:0006-0305	0.702	55.03	0	374	80.637	31.199	0.927	38.647	3687	1.258	0.795	0.931	0.340895
235	TTBK2_KAN488-3_6.tif:0007-0591	1.027	70.551	0	315	59.906	60.53	0.943	72.472	6914	1.205	0.83	0.961	0.639258
236	TTBK2_KAN488-3_6.tif:0008-0635	0.828	51.203	0	138	14.23	65.005	0.947	42.399	4045	1.128	0.887	0.913	0.373995
237	TTBK2_KAN488-3_6.tif:0009-0686	1.394	78.91	0	515	100.933	70.194	0.871	110.007	10495	1.447	0.691	0.924	0.970352
238	TTBK2_KAN488-3_6.tif:0010-0780	1.394	92.759	0	688	129.233	79.869	0.871	129.315	12337	1.455	0.687	0.92	1.14066
239	TTBK2_KAN488-3_6.tif:0011-0791	1.247	116.849	0	793	140.04	80.917	0.771	145.75	13905	1.862	0.537	0.869	1.28564
240	TTBK2_KAN488-3_6.tif:0012-0864	0.681	24.508	0	96	109.911	88.452	0.951	16.698	1593	1.112	0.899	0.949	0.147286
241	TTBK2_KAN488-3_6.tif:0013-0885	0.954	85.593	0	415	36.596	90.625	0.837	81.643	7789	1.734	0.577	0.905	0.720159
242	TTBK2_KAN488-3_6.tif:0014-0968	1.499	81.937	0	603	77.539	99.064	0.779	122.816	11717	1.663	0.601	0.869	1.08334
										11263.8				1.04143
243	TTBK2_KAN488-4_1.tif:0001-0059	0.723	100.493	0	353	126.535	6.153	0.81	72.681	6934	1.174	0.852	0.873	0.641107
244	TTBK2_KAN488-4_1.tif:0002-0118	0.943	77.422	0	300	71.882	12.074	0.957	73.038	6968	1.083	0.924	0.928	0.644251
245	TTBK2_KAN488-4_1.tif:0003-0331	1.038	78.162	0	375	36.31	33.892	0.898	81.109	7738	1.372	0.729	0.896	0.715444
246	TTBK2_KAN488-4_1.tif:0004-0417	1.09	119.404	0	468	120.127	42.736	0.987	130.164	12418	1.063	0.941	0.945	1.14815
247	TTBK2_KAN488-4_1.tif:0005-0431	1.122	64.187	0	420	54.991	44.138	0.839	71.989	6868	1.603	0.624	0.866	0.635005
248	TTBK2_KAN488-4_1.tif:0006-0492	1.184	61.735	0	538	90.469	50.415	0.896	73.121	6976	1.249	0.8	0.919	0.644991
249	TTBK2_KAN488-4_1.tif:0007-0670	0.996	68.505	0	197	63.362	68.598	0.932	68.216	6508	1.189	0.841	0.922	0.60172
250	TTBK2_KAN488-4_1.tif:0008-0748	1.038	92.99	0	407	134.969	76.565	0.882	96.496	9206	1.254	0.797	0.925	0.851173
251	TTBK2_KAN488-4_1.tif:0009-0792	1.195	59.482	0	210	10.884	81.096	0.92	71.077	6781	1.32	0.758	0.898	0.626961
252	TTBK2_KAN488-4_1.tif:0010-0828	1.446	170.42	0	1201	99.76	84.78	0.89	246.512	23518	1.541	0.649	0.962	2.17444
253	TTBK2_KAN488-4_1.tif:0011-1032	0.912	51.586	0	520	114.924	105.732	0.826	47.043	4488	1.262	0.792	0.906	0.414954
254	TTBK2_KAN488-4_2.tif:0001-0058	1.027	28.806	0	313	98.262	6.009	0.943	29.59	2823	1.14	0.877	0.947	0.26101
255	TTBK2_KAN488-4_2.tif:0002-0155	1.174	142.223	0	752	28.512	15.875	0.829	166.966	15929	1.124	0.89	0.865	1.47277
256	TTBK2_KAN488-4_2.tif:0003-0336	1.048	63.98	0	434	99.422	34.405	0.949	67.063	6398	1.16	0.862	0.935	0.59155
257	TTBK2_KAN488-4_2.tif:0004-0345	1.09	68.865	0	345	10.502	35.32	0.887	75.071	7162	1.343	0.744	0.933	0.662188
258	TTBK2_KAN488-4_2.tif:0005-0403	1.331	112.575	0	453	126.477	41.328	0.903	149.859	14297	1.431	0.699	0.914	1.32188
259	TTBK2_KAN488-4_2.tif:0006-0458	1.289	80.447	0	534	81.987	46.931	0.86	103.718	9895	1.544	0.648	0.925	0.914877
260	TTBK2_KAN488-4_2.tif:0007-0484	1.205	76.878	0	513	52.346	49.554	0.818	92.67	8841	1.319	0.758	0.855	0.817426
261	TTBK2_KAN488-4_2.tif:0008-0598	0.901	83.128	0	475	51.892	61.288	0.843	74.935	7149	1.327	0.753	0.882	0.660986
262	TTBK2_KAN488-4_2.tif:0009-0698	1.279	58.926	0	445	11.572	71.495	0.918	75.354	7189	1.259	0.794	0.904	0.664684
263	TTBK2_KAN488-4_2.tif:0010-0780	1.415	111.519	0	821	59.9	79.854	0.8	157.804	15055	1.766	0.566	0.9	1.39196
264	TTBK2_KAN488-4_2.tif:0011-0959	1.478	165.638	0	1115	118.445	98.165	0.836	244.804	23355	1.573	0.636	0.925	2.15937
265	TTBK2_KAN488-4_2.tif:0012-0970	1.027	109.122	0	676	34.479	99.369	0.961	112.093	10694	1.038	0.964	0.925	0.988751
266	TTBK2_KAN488-4_2.tif:0013-1023	1.405	143.246	0	665	75.957	104.791	0.845	201.199	19195	1.218	0.821	0.882	1.77474
267	TTBK2_KAN488-4_3.tif:0001-0035	0.849	72.852	0	332	76.01	3.566	0.95	61.853	5901	1.052	0.951	0.947	0.545598
268	TTBK2_KAN488-4_3.tif:0002-0043	0.88	36.881	0	114	139.102	4.477	0.937	32.473	3098	1.249	0.801	0.928	0.286436
269	TTBK2_KAN488-4_3.tif:0003-0185	1.331	193.15	0	808	55.541	18.992	0.955	257.12	24530	1.16	0.862	0.914	2.26801
270	TTBK2_KAN488-4_3.tif:0004-0313	1.405	23.97	0	152	42.264	32.08	0.836	33.668	3212	1.731	0.578	0.884	0.296977
271	TTBK2_KAN488-4_3.tif:0005-0356	1.038	14.333	0	177	91.999	36.499	0.94	14.874	1419	1.106	0.904	0.917	0.131199
272	TTBK2_KAN488-4_3.tif:0006-0415	1.205	50.322	0	308	123.514	42.451	0.94	60.659	5787	1.424	0.702	0.935	0.535057
273	TTBK2_KAN488-4_3.tif:0007-0568	1.132	89.046	0	592	37.151	58.197	0.872	100.804	9617	1.209	0.827	0.864	0.889173
274	TTBK2_KAN488-4_3.tif:0008-0572	1.405	95.851	0	485	100.464	58.634	0.775	134.629	12844	1.849	0.541	0.887	1.18754
275	TTBK2_KAN488-4_3.tif:0009-0654	1.321	142.341	0	910	68.434	67.002	0.892	187.992	17935	1.318	0.758	0.955	1.65824
276	TTBK2_KAN488-4_3.tif:0010-0665	1.394	173.083	0	1191	131.357	68.051	0.848	241.292	23020	1.362	0.734	0.927	2.12839
277	TTBK2_KAN488-4_3.tif:0011-0806	0.933	48.404	0	154	20.606	82.5	0.915	45.156	4308	1.101	0.908	0.922	0.398311
278	TTBK2_KAN488-4_3.tif:0012-0808	1.205	84.53	0	372	53.025	82.787	0.94	101.894	9721	1.282	0.78	0.931	0.898789
279	TTBK2_KAN488-4_3.tif:0013-0913	1.258	111.692	0	638	109.599	93.512	0.925	140.488	13403	1.36	0.735	0.945	1.23922
280	TTBK2_KAN488-4_4.tif:0001-0145	0.87	57.843	0	204	129.282	14.922	0.959	50.323	4801	1.272	0.786	0.927	0.443893
281	TTBK2_KAN488-4_4.tif:0002-0239	0.88	10.214	0	93	83.555	24.549	0.957	8.993	858	1.124	0.889	0.903	0.0793294
282	TTBK2_KAN488-4_4.tif:0003-0261	0.922	28.364	0	249	3.568	26.763	1	26.163	2496	1.116	0.896	0.931	0.230776
283	TTBK2_KAN488-4_4.tif:0004-0301	1.237	93.737	0	408	37.183	30.877	0.873	115.94	11061	1.521	0.658	0.915	1.02268
284	TTBK2_KAN488-4_4.tif:0005-0367	0.922	24.318	0	218	52.513	37.576	0.935	22.431	2140	1.168	0.856	0.921	0.197861
285	TTBK2_KAN488-4_4.tif:0006-0439	0.87	279.157	0	933	134.194	44.931	0.926	242.865	23170	1.086	0.921	0.922	2.14226
286	TTBK2_KAN488-4_4.tif:0007-0595	0.996	57.495	0	271	140.155	60.92	0.957	57.252	5462	1.023	0.978	0.974	0.505008
287	TTBK2_KAN488-4_4.tif:0008-0661	0.891	22.282	0	85	110.797	67.635	0.949	19.853	1894	1.056	0.947	0.939	0.175116
288	TTBK2_KAN488-4_4.tif:0009-0673	1.247	135.529	0	872	91.819	68.924	0.832	169.051	16128	1.731	0.578	0.919	1.49117
289	TTBK2_KAN488-4_4.tif:0010-0807	1.059	57.317	0	179	28.375	82.65	0.959	60.679	5789	1.171	0.854	0.944	0.535242
290	TTBK2_KAN488-4_4.tif:0011-0880	1.258	109.175	0	493	84.495	90.12	0.952	137.323	13101	1.201	0.833	0.941	1.2113
291	TTBK2_KAN488-4_5.tif:0001-0115	1.226	74.88	0	627	137.501	11.898	0.719	91.832	8761	1.108	0.903	0.807	0.810029
292	TTBK2_KAN488-4_5.tif:0002-0224	1.08	112.699	0	708	109.76	22.936	0.935	121.673	11608	1.133	0.883	0.928	1.07326
293	TTBK2_KAN488-4_5.tif:0003-0241	1.247	118.605	0	628	48.38	24.728	0.906	147.941	14114	1.333	0.75	0.915	1.30496
294	TTBK2_KAN488-4_5.tif:0004-0355	0.985	29.596	0	252	12.913	36.328	0.892	29.161	2782	1.25	0.8	0.917	0.25722
295	TTBK2_KAN488-4_5.tif:0005-0503	1.53	108.116	0	907	72.805	51.555	0.888	165.456	15785	1.148	0.871	0.898	1.45946
296	TTBK2_KAN488-4_5.tif:0006-0614	1.446	111.341	0	740	93.003	62.946	0.848	161.054	15365	1.457	0.686	0.929	1.42062
297	TTBK2_KAN488-4_5.tif:0007-0615	1.226	153.966	0	1055	40.173	63.016	0.928	188.82	18014	1.189	0.841	0.929	1.66555
298	TTBK2_KAN488-4_5.tif:0008-0680	1.677	144.075	0	1273	137.784	69.618	0.871	241.628	23052	1.427	0.701	0.917	2.13135
299	TTBK2_KAN488-4_5.tif:0009-0819	1.09	173.058	0	595	66.175	83.878	0.927	188.653	17998	1.163	0.86	0.945	1.66407
300	TTBK2_KAN488-4_5.tif:0010-0895	1.143	87.587	0	363	94.78	91.696	0.891	100.07	9547	1.265	0.791	0.901	0.882701
301	TTBK2_KAN488-4_5.tif:0011-0905	1.08	118.796	0	504	3.349	92.701	0.852	128.256	12236	1.276	0.784	0.907	1.13132
302	TTBK2_KAN488-4_5.tif:0012-1015	1.509	132.056	0	959	49.847	104.008	0.832	199.323	19016	1.454	0.688	0.886	1.75819
303	TTBK2_KAN488-4_6.tif:0001-0100	1.08	33.65	0	299	119.914	10.241	0.965	36.33	3466	1.138	0.879	0.928	0.320461
304	TTBK2_KAN488-4_6.tif:0002-0247	1.101	23.143	0	193	112.796	25.289	0.953	25.471	2430	1.094	0.914	0.921	0.224674
305	TTBK2_KAN488-4_6.tif:0003-0282	1.258	78.958	0	625	89.658	28.786	0.83	99.316	9475	1.34	0.746	0.899	0.876044
306	TTBK2_KAN488-4_6.tif:0004-0297	1.184	10.513	0	38	40.088	30.416	0.826	12.452	1188	1.511	0.662	0.883	0.109841
307	TTBK2_KAN488-4_6.tif:0005-0396	1.279	96.82	0	605	81.501	40.592	0.834	123.812	11812	1.71	0.585	0.868	1.09212
308	TTBK2_KAN488-4_6.tif:0006-0567	1.132	77.111	0	340	41.494	58.018	0.867	87.293	8328	1.348	0.742	0.931	0.769994
309	TTBK2_KAN488-4_6.tif:0007-0601	1.153	84.936	0	456	83.698	61.588	0.955	97.932	9343	1.134	0.882	0.913	0.86384
310	TTBK2_KAN488-4_6.tif:0008-0657	1.321	110.944	0	769	11.118	67.271	0.736	146.526	13979	2.127	0.47	0.863	1.29248
311	TTBK2_KAN488-4_6.tif:0009-0760	1.132	70.241	0	394	47.233	77.868	0.967	79.515	7586	1.254	0.797	0.923	0.70139
312	TTBK2_KAN488-4_6.tif:0010-0851	1.562	110.074	0	688	73.19	87.19	0.916	171.913	16401	1.11	0.901	0.931	1.51641
313	TTBK2_KAN488-4_6.tif:0011-0960	1.279	128.32	0	966	19.129	98.365	0.968	164.094	15655	1.149	0.87	0.949	1.44744
314	TTBK2_KAN488-4_6.tif:0012-0971	1.363	66.515	0	467	77.972	99.463	0.763	90.637	8647	1.629	0.614	0.833	0.799489
										10342.6				0.956262
315	TTBK2_KAN488-5_1.tif:0001-0062	0.828	85.684	0	493	3.309	6.395	0.882	70.952	6769	1.214	0.823	0.903	0.625852
316	TTBK2_KAN488-5_1.tif:0002-0190	1.195	127.456	0	781	67.592	19.513	0.916	152.301	14530	1.231	0.812	0.946	1.34342
317	TTBK2_KAN488-5_1.tif:0003-0258	1.289	163.593	0	1236	30.302	26.45	0.964	210.916	20122	1.156	0.865	0.925	1.86045
318	TTBK2_KAN488-5_1.tif:0004-0315	0.797	44.408	0	167	118.666	32.274	0.959	35.376	3375	1.163	0.86	0.938	0.312047
319	TTBK2_KAN488-5_1.tif:0005-0441	1.08	162.252	0	724	93.684	45.193	0.947	175.173	16712	1.141	0.877	0.949	1.54517
320	TTBK2_KAN488-5_1.tif:0006-0462	1.101	191.019	0	890	117.489	47.328	0.924	210.235	20057	1.34	0.746	0.917	1.85444
321	TTBK2_KAN488-5_1.tif:0007-0500	1.006	103.865	0	478	23.098	51.211	0.973	104.515	9971	1.06	0.944	0.914	0.921904
322	TTBK2_KAN488-5_1.tif:0008-0521	1.111	92.226	0	425	80.414	53.396	0.92	102.471	9776	1.233	0.811	0.895	0.903874
323	TTBK2_KAN488-5_1.tif:0009-0526	1.143	176.11	0	860	2.173	53.88	0.93	201.21	19196	1.218	0.821	0.916	1.77483
324	TTBK2_KAN488-5_1.tif:0010-0724	1.31	92.352	0	542	76.059	74.105	0.841	121.003	11544	1.481	0.675	0.903	1.06734
325	TTBK2_KAN488-5_1.tif:0011-0732	1.279	141.533	0	897	33.762	74.966	0.903	180.99	17267	1.248	0.801	0.91	1.59648
326	TTBK2_KAN488-5_1.tif:0012-0826	1.237	145.907	0	561	127.923	84.622	0.936	180.466	17217	1.249	0.801	0.937	1.59186
327	TTBK2_KAN488-5_1.tif:0013-0935	1.52	172.89	0	994	84.189	95.765	0.882	262.77	25069	1.641	0.609	0.924	2.31784
328	TTBK2_KAN488-5_2.tif:0001-0019	0.975	27.914	0	84	134.84	1.988	0.943	27.211	2596	1.215	0.823	0.921	0.240022
329	TTBK2_KAN488-5_2.tif:0002-0038	1.405	85.925	0	360	95.591	3.944	0.868	120.688	11514	1.285	0.778	0.902	1.06457
330	TTBK2_KAN488-5_2.tif:0003-0142	0.629	27.283	0	127	137.199	14.533	0.863	17.159	1637	1.454	0.688	0.876	0.151355
331	TTBK2_KAN488-5_2.tif:0004-0145	1.101	141.086	0	743	40.134	14.852	0.965	155.278	14814	1.139	0.878	0.946	1.36968
332	TTBK2_KAN488-5_2.tif:0005-0154	1.111	71.453	0	433	67.753	15.797	0.916	79.39	7574	1.12	0.893	0.951	0.700281
333	TTBK2_KAN488-5_2.tif:0006-0206	1.247	72.605	0	364	106.028	21.1	0.856	90.563	8640	1.264	0.791	0.926	0.798841
334	TTBK2_KAN488-5_2.tif:0007-0241	1.017	89.216	0	463	141.321	24.708	0.983	90.71	8654	1.074	0.931	0.928	0.800136
335	TTBK2_KAN488-5_2.tif:0008-0295	1.415	96.911	0	643	110.891	30.16	0.923	137.134	13083	1.238	0.808	0.915	1.20963
336	TTBK2_KAN488-5_2.tif:0009-0340	0.954	103.33	0	452	6.962	34.803	0.948	98.561	9403	1.106	0.904	0.958	0.869387
337	TTBK2_KAN488-5_2.tif:0010-0483	1.216	166.81	0	871	137.39	49.544	0.868	202.824	19350	1.463	0.683	0.913	1.78907
338	TTBK2_KAN488-5_2.tif:0011-0508	1.289	98.041	0	599	67.483	52.039	0.91	126.401	12059	1.341	0.745	0.921	1.11496
339	TTBK2_KAN488-5_2.tif:0012-0547	1.111	113.321	0	593	113.386	56.056	0.916	125.908	12012	1.159	0.863	0.942	1.11061
340	TTBK2_KAN488-5_2.tif:0013-0577	0.964	147.217	0	601	21.926	59.099	0.885	141.966	13544	1.608	0.622	0.953	1.25226
341	TTBK2_KAN488-5_2.tif:0014-0712	1.321	160.389	0	1062	115.787	72.968	0.959	211.828	20209	1.024	0.976	0.926	1.86849
342	TTBK2_KAN488-5_2.tif:0015-0717	1.08	146.738	0	533	37.953	73.434	0.978	158.423	15114	1.029	0.972	0.936	1.39742
343	TTBK2_KAN488-5_2.tif:0016-0795	1.3	111.323	0	635	9.594	81.42	0.933	144.692	13804	1.168	0.856	0.908	1.2763
344	TTBK2_KAN488-5_2.tif:0017-0820	0.797	41.487	0	117	8.628	84.037	0.959	33.049	3153	1.123	0.89	0.938	0.291522
345	TTBK2_KAN488-5_2.tif:0018-0851	0.954	103.11	0	476	67.071	87.146	0.905	98.351	9383	1.462	0.684	0.929	0.867538
346	TTBK2_KAN488-5_2.tif:0019-0941	1.143	111.661	0	322	80.278	96.39	0.959	127.575	12171	1.252	0.798	0.936	1.12531
347	TTBK2_KAN488-5_2.tif:0020-0971	1.017	139.32	0	417	117.638	99.461	0.997	141.652	13514	1.107	0.903	0.951	1.24948
348	TTBK2_KAN488-5_3.tif:0001-0036	0.639	24.246	0	76	48.024	3.708	0.968	15.503	1479	1.201	0.833	0.938	0.136746
349	TTBK2_KAN488-5_3.tif:0002-0057	0.807	28.662	0	103	3.912	5.864	0.923	23.133	2207	1.331	0.751	0.917	0.204056
350	TTBK2_KAN488-5_3.tif:0003-0064	1.163	110.018	0	665	72.084	6.525	0.812	128.004	12212	1.518	0.659	0.86	1.1291
351	TTBK2_KAN488-5_3.tif:0004-0169	0.734	281.957	67	546	35.848	17.311	0.932	206.88	19737	1.275	0.784	0.946	1.82485
352	TTBK2_KAN488-5_3.tif:0005-0176	1.226	123.632	0	488	39.935	18.054	0.901	151.62	14465	1.3	0.769	0.929	1.33741
353	TTBK2_KAN488-5_3.tif:0006-0187	1.132	124.315	0	443	136.094	19.158	0.91	140.729	13426	1.352	0.74	0.919	1.24135
354	TTBK2_KAN488-5_3.tif:0007-0283	1.08	94.854	0	594	67.034	28.961	0.918	102.408	9770	1.283	0.78	0.936	0.90332
355	TTBK2_KAN488-5_3.tif:0008-0392	0.681	43.646	0	123	13.931	40.177	0.914	29.737	2837	1.156	0.865	0.949	0.262305
356	TTBK2_KAN488-5_3.tif:0009-0523	1.467	194.836	0	1656	132.286	53.589	0.874	285.914	27277	1.147	0.872	0.889	2.52199
357	TTBK2_KAN488-5_3.tif:0010-0531	1.373	132.611	0	683	82.503	54.41	0.906	182.091	17372	1.337	0.748	0.916	1.60619
358	TTBK2_KAN488-5_3.tif:0011-0633	1.373	115.588	0	773	42.851	64.829	0.872	158.716	15142	1.271	0.787	0.897	1.40001
359	TTBK2_KAN488-5_3.tif:0012-0744	1.143	66.688	0	363	118.643	76.271	0.959	76.193	7269	1.281	0.78	0.944	0.672081
360	TTBK2_KAN488-5_3.tif:0013-0751	1.111	109.642	0	465	95.629	76.966	0.962	121.82	11622	1.092	0.916	0.922	1.07455
361	TTBK2_KAN488-5_3.tif:0014-0821	0.839	42.3	0	165	12.575	84.033	0.959	35.471	3384	1.097	0.912	0.914	0.31288
362	TTBK2_KAN488-5_3.tif:0015-0871	0.985	49.564	0	235	73.777	89.203	0.892	48.835	4659	1.279	0.782	0.917	0.430764
363	TTBK2_KAN488-5_3.tif:0016-1019	1.059	143.842	0	839	43.458	104.369	0.99	152.28	14528	1.112	0.899	0.944	1.34324
364	TTBK2_KAN488-5_4.tif:0001-0086	0.786	36.733	0	194	128.912	8.8	0.926	28.878	2755	1.284	0.779	0.968	0.254723
365	TTBK2_KAN488-5_4.tif:0002-0114	1.3	147.097	0	908	107.087	11.709	0.917	191.189	18240	1.315	0.761	0.919	1.68644
366	TTBK2_KAN488-5_4.tif:0003-0126	0.933	180.112	0	464	90.8	12.906	0.993	168.024	16030	1.021	0.979	0.952	1.48211
367	TTBK2_KAN488-5_4.tif:0004-0353	1.059	76.02	0	501	75.308	36.104	0.888	80.48	7678	1.524	0.656	0.927	0.709896
368	TTBK2_KAN488-5_4.tif:0005-0466	1.457	106.777	0	589	94.402	47.743	0.901	155.572	14842	1.423	0.703	0.924	1.37227
369	TTBK2_KAN488-5_4.tif:0006-0471	1.132	81.731	0	460	13.393	48.152	0.857	92.523	8827	1.355	0.738	0.919	0.816131
370	TTBK2_KAN488-5_4.tif:0007-0503	1.101	119.981	0	416	125.831	51.49	0.869	132.05	12598	1.411	0.709	0.913	1.16479
371	TTBK2_KAN488-5_4.tif:0008-0575	1.205	75.2	0	389	54.716	58.858	0.827	90.647	8648	1.592	0.628	0.902	0.799581
372	TTBK2_KAN488-5_4.tif:0009-0707	1.446	119.449	0	701	36.946	72.384	0.798	172.783	16484	1.738	0.575	0.893	1.52409
373	TTBK2_KAN488-5_4.tif:0010-0853	1.31	89.88	0	624	105.652	87.358	0.899	117.764	11235	1.572	0.636	0.94	1.03877
374	TTBK2_KAN488-5_4.tif:0011-0898	0.639	288.787	39	617	65.62	91.944	0.985	184.648	17616	1.04	0.961	0.976	1.62875
375	TTBK2_KAN488-5_4.tif:0012-0946	1.132	80.861	0	308	3.81	96.877	0.938	91.538	8733	1.284	0.779	0.911	0.80744
376	TTBK2_KAN488-5_4.tif:0013-0973	0.912	39.011	0	128	58.24	99.64	1	35.575	3394	1.198	0.835	0.951	0.313804
377	TTBK2_KAN488-5_5.tif:0001-0009	1.038	145.374	0	698	54.067	0.947	0.922	150.855	14392	1.102	0.907	0.957	1.33066
378	TTBK2_KAN488-5_5.tif:0002-0076	0.671	115.172	0	446	2	7.811	1	77.262	7371	1.161	0.861	0.955	0.681512
379	TTBK2_KAN488-5_5.tif:0003-0240	1.027	102.01	0	524	85.592	24.6	0.961	104.787	9997	1.042	0.959	0.938	0.924308
380	TTBK2_KAN488-5_5.tif:0004-0402	0.975	97.011	0	262	140.954	41.212	0.988	94.567	9022	1.142	0.876	0.939	0.834161
381	TTBK2_KAN488-5_5.tif:0005-0433	0.996	62.326	0	183	10.339	44.36	0.976	62.063	5921	1.156	0.865	0.95	0.547447
382	TTBK2_KAN488-5_5.tif:0006-0465	0.723	53.739	0	272	39.554	47.657	0.918	38.867	3708	1.112	0.899	0.926	0.342836
383	TTBK2_KAN488-5_5.tif:0007-0470	1.069	143.49	0	624	66.017	48.072	0.87	153.412	14636	1.339	0.747	0.919	1.35322
384	TTBK2_KAN488-5_5.tif:0008-0508	1.143	57.413	0	425	107.618	52.048	0.88	65.595	6258	1.344	0.744	0.886	0.578605
385	TTBK2_KAN488-5_5.tif:0009-0618	2.243	51.304	0	343	91.974	63.273	0.651	115.08	10979	2.426	0.412	0.881	1.0151
386	TTBK2_KAN488-5_5.tif:0010-0648	1.017	89.742	0	285	75.134	66.348	0.951	91.245	8705	1.015	0.985	0.933	0.804851
387	TTBK2_KAN488-5_5.tif:0011-0732	1.111	84.189	0	414	30.003	75.004	0.904	93.54	8924	1.379	0.725	0.926	0.8251
388	TTBK2_KAN488-5_5.tif:0012-0882	1.184	55.088	0	341	94.779	90.249	0.822	65.25	6225	1.633	0.612	0.922	0.575554
389	TTBK2_KAN488-5_5.tif:0013-0905	1.122	69.355	0	387	53.657	92.626	0.941	77.786	7421	1.158	0.863	0.93	0.686135
390	TTBK2_KAN488-5_5.tif:0014-0943	1.132	144.963	0	917	70.16	96.58	0.921	164.104	15656	1.348	0.742	0.943	1.44753
391	TTBK2_KAN488-5_5.tif:0015-0970	1.31	95.8	0	632	108.613	99.303	0.925	125.52	11975	1.323	0.756	0.943	1.10719
392	TTBK2_KAN488-5_6.tif:0001-0056	1.143	62.688	0	285	88.788	5.711	0.959	71.623	6833	1.059	0.944	0.936	0.631769
393	TTBK2_KAN488-5_6.tif:0002-0072	1.488	64.148	0	473	56.236	7.451	0.864	95.479	9109	1.515	0.66	0.896	0.842205
394	TTBK2_KAN488-5_6.tif:0003-0127	1.415	154.719	0	852	29.566	12.988	0.898	218.935	20887	1.367	0.732	0.909	1.93118
395	TTBK2_KAN488-5_6.tif:0004-0159	1.195	179.956	0	830	109.378	16.295	0.932	215.035	20515	1.176	0.851	0.919	1.89679
396	TTBK2_KAN488-5_6.tif:0005-0199	1.53	96.74	0	660	80.495	20.396	0.879	148.046	14124	1.411	0.709	0.896	1.30588
397	TTBK2_KAN488-5_6.tif:0006-0269	1.059	107.584	0	430	49.142	27.508	0.99	113.896	10866	1.223	0.818	0.944	1.00465
398	TTBK2_KAN488-5_6.tif:0007-0288	1.017	93.289	0	410	12.942	29.523	0.892	94.85	9049	1.483	0.674	0.924	0.836657
399	TTBK2_KAN488-5_6.tif:0008-0322	1.143	119.037	0	636	119.441	33.011	0.942	136.002	12975	1.114	0.898	0.96	1.19965
400	TTBK2_KAN488-5_6.tif:0009-0336	1.101	108.752	0	360	107.732	34.485	0.833	119.692	11419	1.319	0.758	0.886	1.05578
401	TTBK2_KAN488-5_6.tif:0010-0390	0.996	73.842	0	451	94.132	39.917	0.944	73.53	7015	1.15	0.87	0.936	0.648596
402	TTBK2_KAN488-5_6.tif:0011-0443	1.268	112.736	0	754	83.936	45.326	0.87	142.983	13641	1.344	0.744	0.91	1.26123
403	TTBK2_KAN488-5_6.tif:0012-0557	0.692	25.333	0	108	128.074	56.995	0.865	17.526	1672	1.11	0.901	0.868	0.154591
404	TTBK2_KAN488-5_6.tif:0013-0628	1.373	62.16	0	476	42.145	64.264	0.805	85.354	8143	1.791	0.558	0.913	0.75289
405	TTBK2_KAN488-5_6.tif:0014-0741	1.153	47.082	0	126	140.069	75.904	0.899	54.286	5179	1.502	0.666	0.928	0.478843
406	TTBK2_KAN488-5_6.tif:0015-0889	0.975	121.946	0	625	43.933	90.997	0.988	118.875	11341	1.083	0.923	0.939	1.04857
407	TTBK2_KAN488-5_6.tif:0016-0918	1.174	66.741	0	444	72.021	94.053	0.973	78.352	7475	1.171	0.854	0.922	0.691127
408	TTBK2_KAN488-5_6.tif:0017-0921	1.258	238.525	0	1092	97.9	94.342	0.914	300.022	28623	1.263	0.792	0.938	2.64644
409	TTBK2_KAN488-5_6.tif:0018-0953	1.09	125.356	0	790	141.656	97.578	0.85	136.652	13037	1.383	0.723	0.897	1.20538
410	TTBK2_KAN488-5_6.tif:0019-0991	0.985	107.521	0	461	117.349	101.509	0.934	105.94	10107	1.23	0.813	0.94	0.934478
										11473.9				1.06086
411	TTBK2_KAN488-6_1.tif:0001-0071	0.996	127.389	0	620	13.012	7.302	0.944	126.851	12102	1.17	0.855	0.941	1.11893
412	TTBK2_KAN488-6_1.tif:0002-0228	1.467	94.314	0	698	125.401	23.42	0.744	138.402	13204	1.931	0.518	0.881	1.22082
413	TTBK2_KAN488-6_1.tif:0003-0280	0.849	20.741	0	119	76.681	28.672	1	17.61	1680	1.157	0.865	0.936	0.15533
414	TTBK2_KAN488-6_1.tif:0004-0304	1.006	94.698	0	502	101.386	31.131	0.899	95.291	9091	1.477	0.677	0.893	0.84054
415	TTBK2_KAN488-6_1.tif:0005-0468	0.933	139.64	0	634	77.199	47.91	0.933	130.269	12428	1.25	0.8	0.904	1.14907
416	TTBK2_KAN488-6_1.tif:0006-0505	0.744	5.648	0	74	40.234	51.732	0.864	4.203	401	1.276	0.784	0.893	0.0370759
417	TTBK2_KAN488-6_1.tif:0007-0633	1.331	140.583	0	999	33.614	64.75	0.864	187.143	17854	1.245	0.803	0.914	1.65075
418	TTBK2_KAN488-6_1.tif:0008-0669	1.268	97.198	0	415	108.261	68.584	0.86	123.277	11761	1.5	0.667	0.91	1.0874
419	TTBK2_KAN488-6_1.tif:0009-0756	1.237	115.712	0	593	134.231	77.407	0.914	143.119	13654	1.207	0.828	0.908	1.26243
420	TTBK2_KAN488-6_1.tif:0010-0789	1.132	91.852	0	565	82.884	80.747	0.938	103.98	9920	1.017	0.983	0.927	0.917188
421	TTBK2_KAN488-6_1.tif:0011-0849	0.88	99.536	0	468	28.606	86.896	0.957	87.639	8361	1.239	0.807	0.908	0.773046
422	TTBK2_KAN488-6_1.tif:0012-0853	1.331	93.22	0	511	105.916	87.323	0.81	124.095	11839	1.743	0.574	0.898	1.09462
423	TTBK2_KAN488-6_1.tif:0013-0882	1.069	157.627	0	618	53.941	90.348	0.968	168.527	16078	1.022	0.979	0.936	1.48655
424	TTBK2_KAN488-6_1.tif:0014-0916	1.101	47.057	0	202	124.659	93.776	0.953	51.791	4941	1.296	0.772	0.933	0.456837
425	TTBK2_KAN488-6_1.tif:0015-0955	0.86	121.939	0	540	33.038	97.751	0.915	104.808	9999	1.444	0.692	0.937	0.924493
426	TTBK2_KAN488-6_1.tif:0016-0973	0.891	84.212	0	445	19.637	99.673	0.968	75.029	7158	1.133	0.882	0.919	0.661818
427	TTBK2_KAN488-6_2.tif:0001-0092	0.65	31.097	0	135	128.14	9.396	0.944	20.209	1928	1.096	0.912	0.932	0.17826
428	TTBK2_KAN488-6_2.tif:0002-0114	1.226	75.966	0	466	113.118	11.725	0.856	93.163	8888	1.026	0.975	0.873	0.821771
429	TTBK2_KAN488-6_2.tif:0003-0208	0.88	143.071	0	524	69.779	21.275	0.951	125.971	12018	1.14	0.877	0.971	1.11117
430	TTBK2_KAN488-6_2.tif:0004-0243	0.66	60.238	0	146	15.738	24.922	0.906	39.779	3795	1.149	0.871	0.894	0.35088
431	TTBK2_KAN488-6_2.tif:0005-0362	0.734	44.429	3	106	46.169	37.084	0.903	32.599	3110	1.245	0.803	0.881	0.287546
432	TTBK2_KAN488-6_2.tif:0006-0415	0.975	12.054	0	106	141.768	42.518	0.895	11.75	1121	1.363	0.734	0.939	0.103646
433	TTBK2_KAN488-6_2.tif:0007-0594	1.205	71.6	0	433	91.541	60.814	0.999	86.308	8234	1.02	0.98	0.931	0.761303
434	TTBK2_KAN488-6_2.tif:0008-0598	1.017	129.206	0	845	103.026	61.236	0.983	131.369	12533	1.203	0.831	0.924	1.15878
435	TTBK2_KAN488-6_2.tif:0009-0772	1.101	47.476	0	145	114.422	79.075	0.858	52.252	4985	1.36	0.736	0.909	0.460906
436	TTBK2_KAN488-6_2.tif:0010-0867	0.891	41.553	0	167	27.55	88.797	0.935	37.022	3532	1.209	0.827	0.909	0.326563
437	TTBK2_KAN488-6_2.tif:0011-0879	1.436	104.796	0	770	61.671	89.966	0.912	150.488	14357	1.236	0.809	0.907	1.32743
438	TTBK2_KAN488-6_2.tif:0012-0922	1.289	160.016	0	799	126.667	94.405	0.86	206.304	19682	1.152	0.868	0.904	1.81977
439	TTBK2_KAN488-6_2.tif:0013-1006	0.985	74.862	0	274	56.125	103.052	0.999	73.761	7037	1.18	0.848	0.945	0.650631
440	TTBK2_KAN488-6_2.tif:0014-1017	1.384	75.492	0	737	108.562	104.15	0.878	104.452	9965	1.377	0.726	0.889	0.921349
441	TTBK2_KAN488-6_3.tif:0001-0020	0.828	36.101	0	160	124.203	2.077	0.913	29.894	2852	1.229	0.814	0.908	0.263692
442	TTBK2_KAN488-6_3.tif:0002-0098	1.216	142.914	0	585	69.664	10.083	0.92	173.768	16578	1.333	0.75	0.921	1.53278
443	TTBK2_KAN488-6_3.tif:0003-0214	1.237	165.39	0	936	55.249	21.915	0.898	204.564	19516	1.299	0.77	0.915	1.80442
444	TTBK2_KAN488-6_3.tif:0004-0219	0.975	26.323	0	159	130.498	22.423	0.943	25.66	2448	1.277	0.783	0.907	0.226338
445	TTBK2_KAN488-6_3.tif:0005-0239	1.247	111.445	0	718	99.796	24.423	0.891	139.01	13262	1.46	0.685	0.944	1.22618
446	TTBK2_KAN488-6_3.tif:0006-0335	1.331	51.102	0	274	37.299	34.293	0.903	68.027	6490	1.434	0.698	0.92	0.600056
447	TTBK2_KAN488-6_3.tif:0007-0444	0.943	61.322	0	521	70.801	45.467	0.895	57.849	5519	1.149	0.87	0.914	0.510278
448	TTBK2_KAN488-6_3.tif:0008-0549	1.268	143.033	0	1072	32.898	56.239	0.895	181.41	17307	1.266	0.79	0.917	1.60018
449	TTBK2_KAN488-6_3.tif:0009-0572	0.87	61.458	0	252	100.064	58.608	0.908	53.468	5101	1.071	0.934	0.965	0.471631
450	TTBK2_KAN488-6_3.tif:0010-0607	0.943	81.611	0	456	18.412	62.162	0.957	76.989	7345	1.096	0.913	0.933	0.679108
451	TTBK2_KAN488-6_3.tif:0011-0814	1.122	156.43	0	960	89.4	83.385	0.913	175.445	16738	1.235	0.81	0.926	1.54757
452	TTBK2_KAN488-6_3.tif:0012-0834	1.122	83.944	0	694	55.655	85.401	0.913	94.148	8982	1.263	0.791	0.922	0.830462
453	TTBK2_KAN488-6_3.tif:0013-0993	1.101	124.971	0	878	41.666	101.702	0.948	137.543	13122	1.12	0.893	0.981	1.21324
454	TTBK2_KAN488-6_4.tif:0001-0175	0.943	85.856	0	464	44.74	17.894	0.925	80.993	7727	1.243	0.804	0.923	0.714427
455	TTBK2_KAN488-6_4.tif:0002-0316	0.828	194.418	0	885	112.574	32.358	0.895	160.991	15359	1.294	0.773	0.946	1.42007
456	TTBK2_KAN488-6_4.tif:0003-0392	1.279	118.541	0	591	40.863	40.163	0.844	151.589	14462	1.656	0.604	0.904	1.33713
457	TTBK2_KAN488-6_4.tif:0004-0393	1.153	108.5	0	547	121.022	40.338	0.873	125.101	11935	1.391	0.719	0.909	1.10349
458	TTBK2_KAN488-6_4.tif:0005-0596	1.363	90.138	0	571	86.185	61.094	0.808	122.826	11718	1.463	0.683	0.897	1.08343
459	TTBK2_KAN488-6_4.tif:0006-0637	0.975	140.258	0	534	58.576	65.226	0.912	136.725	13044	1.25	0.8	0.916	1.20603
460	TTBK2_KAN488-6_4.tif:0007-0754	0.933	116.157	0	498	22.029	77.276	0.873	108.361	10338	1.415	0.706	0.904	0.955836
461	TTBK2_KAN488-6_4.tif:0008-0975	0.922	130.852	0	511	54.667	99.813	0.982	120.699	11515	1.099	0.91	0.946	1.06466
462	TTBK2_KAN488-6_4.tif:0009-0985	1.048	68.04	0	218	120.45	100.805	0.949	71.319	6804	1.221	0.819	0.943	0.629088
463	TTBK2_KAN488-6_5.tif:0001-0157	1.268	131.876	0	850	119.682	16.116	0.793	167.259	15957	1.576	0.634	0.874	1.47536
464	TTBK2_KAN488-6_5.tif:0002-0315	0.66	29.619	0	82	130.231	32.287	0.943	19.559	1866	1.25	0.8	0.913	0.172528
465	TTBK2_KAN488-6_5.tif:0003-0337	1.195	119.456	0	745	35.413	34.528	0.96	142.742	13618	1.135	0.881	0.927	1.2591
466	TTBK2_KAN488-6_5.tif:0004-0430	1.09	114.856	0	475	71.677	44.044	0.974	125.206	11945	1.193	0.838	0.924	1.10442
467	TTBK2_KAN488-6_5.tif:0005-0462	1.08	118.583	0	590	107.211	47.32	0.935	128.025	12214	1.098	0.911	0.92	1.12929
468	TTBK2_KAN488-6_5.tif:0006-0585	1.153	99.082	0	662	33.887	59.951	0.749	114.242	10899	1.731	0.578	0.876	1.00771
469	TTBK2_KAN488-6_5.tif:0007-0593	1.122	137.196	0	635	123.014	60.707	0.946	153.874	14680	1.185	0.844	0.899	1.35729
470	TTBK2_KAN488-6_5.tif:0008-0664	0.964	204.207	0	1072	50.966	67.966	0.914	196.923	18787	1.133	0.883	0.929	1.73702
471	TTBK2_KAN488-6_5.tif:0009-0813	1.331	82.913	0	571	89.251	83.305	0.845	110.374	10530	1.63	0.613	0.901	0.973588
472	TTBK2_KAN488-6_5.tif:0010-0971	1.027	48.439	0	198	132.944	99.422	0.918	49.757	4747	1.435	0.697	0.903	0.438901
473	TTBK2_KAN488-6_6.tif:0001-0149	1.122	109.607	0	579	108.581	15.239	0.913	122.931	11728	1.243	0.804	0.922	1.08435
474	TTBK2_KAN488-6_6.tif:0002-0240	1.027	72.694	0	508	51.881	24.537	0.873	74.673	7124	1.256	0.796	0.916	0.658674
475	TTBK2_KAN488-6_6.tif:0003-0335	1.174	101.875	0	702	86.002	34.344	0.889	119.598	11410	1.172	0.853	0.918	1.05495
476	TTBK2_KAN488-6_6.tif:0004-0358	1.111	58.283	0	247	132.091	36.712	0.962	64.757	6178	1.202	0.832	0.918	0.571209
477	TTBK2_KAN488-6_6.tif:0005-0469	1.027	70.612	0	510	36.296	48.029	0.93	72.534	6920	1.139	0.878	0.92	0.639813
478	TTBK2_KAN488-6_6.tif:0006-0560	1.027	154.245	0	791	132.344	57.306	0.943	158.444	15116	1.103	0.906	0.956	1.3976
479	TTBK2_KAN488-6_6.tif:0007-0774	1.017	162.814	0	643	49.16	79.299	0.964	165.54	15793	1.101	0.908	0.951	1.4602
480	TTBK2_KAN488-6_6.tif:0008-0783	1.006	98.698	0	420	112.483	80.215	0.924	99.316	9475	1.143	0.875	0.946	0.876044
481	TTBK2_KAN488-6_6.tif:0009-0912	1.017	98.557	0	376	75.411	93.396	0.933	100.207	9560	1.235	0.81	0.942	0.883903
482	TTBK2_KAN488-6_6.tif:0010-0974	1.111	111.236	0	512	41.194	99.725	0.904	123.592	11791	1.074	0.931	0.918	1.09018
483	TTBK2_KAN488-6_6.tif:0011-1025	1.101	120.667	0	596	92.859	105.03	0.984	132.805	12670	1.254	0.798	0.929	1.17145
484	TTBK2_KAN488-6_6.tif:0012-1030	1.038	128.606	0	732	119.501	105.481	0.91	133.455	12732	1.206	0.829	0.938	1.17718
										10210.2				0.944024

## Sheet: RawData_2nd replicate
	Label	Area	Mean	Min	Max	X	Y	Circ	IntDen	RawIntDen	AR	Round	Solidity
122	TTBK2_KAN488-7_1.tif:0001-0290	0.922	190.739	0	905	63.553	29.761	0.835	175.938	16785	1.587	0.63	0.889	1.6
123	TTBK2_KAN488-7_1.tif:0002-0302	1.415	100.674	0	898	107.446	30.892	0.7	142.459	13591	1.551	0.645	0.801	1.29554
124	TTBK2_KAN488-7_1.tif:0003-0401	1.153	82.836	0	501	26.986	41.007	0.791	95.511	9112	1.458	0.686	0.853	0.868585
125	TTBK2_KAN488-7_1.tif:0004-0574	0.671	119.969	0	411	72.537	58.802	0.68	80.48	7678	2.23	0.448	0.795	0.731891
126	TTBK2_KAN488-7_1.tif:0005-0668	0.996	138.811	0	697	65.349	68.372	0.836	138.224	13187	1.244	0.804	0.88	1.25703
127	TTBK2_KAN488-7_1.tif:0006-0715	1.195	94.904	0	591	125.707	73.218	0.816	113.403	10819	1.863	0.537	0.987	1.0313
128	TTBK2_KAN488-7_1.tif:0007-0959	0.776	15.108	0	109	72.623	98.196	0.826	11.719	1118	1.193	0.838	0.886	0.106571
129	TTBK2_KAN488-7_2.tif:0001-0173	0.943	108.756	0	478	67.023	17.786	0.827	102.596	9788	1.422	0.703	0.9	0.933023
130	TTBK2_KAN488-7_2.tif:0002-0279	0.839	203.625	0	763	93.039	28.467	0.745	170.749	16290	1.698	0.589	0.889	1.55281
131	TTBK2_KAN488-7_2.tif:0003-0407	1.3	117.435	0	586	124.459	41.645	0.732	152.637	14562	1.743	0.574	0.873	1.3881
132	TTBK2_KAN488-7_2.tif:0004-0480	0.922	78.239	0	300	26.198	49.241	0.863	72.168	6885	1.288	0.776	0.898	0.6563
133	TTBK2_KAN488-7_2.tif:0005-0762	1.373	117.733	0	963	91.591	78.045	0.805	161.662	15423	1.509	0.663	0.879	1.47017
134	TTBK2_KAN488-7_2.tif:0006-0920	0.723	22.261	0	185	21.133	94.212	0.871	16.1	1536	1.343	0.744	0.902	0.146416
135	TTBK2_KAN488-7_3.tif:0001-0182	0.996	98.242	0	578	77.017	18.657	0.944	97.827	9333	1.12	0.893	0.941	0.889651
136	TTBK2_KAN488-7_3.tif:0002-0274	0.818	18.205	0	124	16.063	28.01	0.87	14.884	1420	1.066	0.938	0.897	0.135359
137	TTBK2_KAN488-7_3.tif:0003-0460	0.671	54.359	0	191	82.437	47.09	0.885	36.466	3479	1.26	0.794	0.901	0.331629
138	TTBK2_KAN488-7_3.tif:0004-0923	0.87	94.578	0	541	105.962	94.422	0.717	82.283	7850	1.466	0.682	0.843	0.748287
139	TTBK2_KAN488-7_3.tif:0005-0975	1.08	92.942	0	629	17.443	99.902	0.89	100.343	9573	1.588	0.63	0.954	0.912529
140	TTBK2_KAN488-7_4.tif:0001-0086	0.86	104.939	0	506	20.701	8.751	0.884	90.196	8605	1.29	0.775	0.927	0.820256
141	TTBK2_KAN488-7_4.tif:0002-0138	0.734	136.414	0	434	111.661	14.131	0.821	100.091	9549	1.133	0.883	0.886	0.910241
142	TTBK2_KAN488-7_4.tif:0003-0204	0.954	203.912	0	804	39.219	20.867	0.837	194.501	18556	1.444	0.693	0.897	1.76882
143	TTBK2_KAN488-7_4.tif:0004-0266	0.65	144.887	5	460	74.414	27.321	0.858	94.159	8983	1.099	0.91	0.892	0.856288
144	TTBK2_KAN488-7_4.tif:0005-0351	0.922	197.466	0	1038	136.453	35.9	0.875	182.143	17377	1.375	0.727	0.907	1.65643
145	TTBK2_KAN488-7_4.tif:0006-0359	0.996	125.042	0	730	103.361	36.748	0.836	124.514	11879	1.607	0.622	0.876	1.13234
146	TTBK2_KAN488-7_4.tif:0007-0562	0.765	114.849	0	402	25.16	57.502	0.827	87.88	8384	1.685	0.594	0.907	0.799189
147	TTBK2_KAN488-7_4.tif:0008-0579	0.933	81.438	0	368	91.127	59.261	0.845	75.973	7248	1.287	0.777	0.881	0.690902
148	TTBK2_KAN488-7_4.tif:0009-0614	1.017	116.907	0	569	115.215	62.92	0.951	118.864	11340	1.105	0.905	0.915	1.08096
149	TTBK2_KAN488-7_4.tif:0010-0656	1.352	97.721	0	575	133.504	67.269	0.836	132.134	12606	1.524	0.656	0.881	1.20164
150	TTBK2_KAN488-7_4.tif:0011-0794	1.122	102.075	0	585	42.056	81.358	0.834	114.483	10922	1.748	0.572	0.93	1.04112
151	TTBK2_KAN488-7_4.tif:0012-0909	1.038	98	0	417	104.435	93.052	0.795	101.695	9702	1.512	0.661	0.904	0.924825
152	TTBK2_KAN488-7_5.tif:0001-0009	0.87	53.602	0	438	105.571	0.884	0.717	46.634	4449	1.654	0.605	0.851	0.424093
153	TTBK2_KAN488-7_5.tif:0002-0139	1.069	156.637	0	887	43.585	14.18	0.848	167.469	15977	1.103	0.907	0.861	1.52298
154	TTBK2_KAN488-7_5.tif:0003-0216	1.52	57.379	0	550	8.067	22.021	0.725	87.209	8320	1.349	0.741	0.876	0.793089
155	TTBK2_KAN488-7_5.tif:0004-0233	1.122	92.729	0	564	113.729	23.935	0.761	104.001	9922	1.537	0.651	0.829	0.945796
156	TTBK2_KAN488-7_5.tif:0005-0423	0.933	60.685	0	408	81.737	43.264	0.783	56.613	5401	1.191	0.84	0.828	0.51484
157	TTBK2_KAN488-7_5.tif:0006-0436	1.384	100.826	0	739	128.819	44.578	0.656	139.503	13309	1.765	0.567	0.788	1.26866
158	TTBK2_KAN488-7_5.tif:0007-0632	1.205	101.8	0	579	86.493	64.773	0.818	122.711	11707	1.706	0.586	0.888	1.11595
159	TTBK2_KAN488-7_5.tif:0008-0657	0.996	141.632	0	625	127.235	67.295	0.857	141.033	13455	1.438	0.696	0.941	1.28257
160	TTBK2_KAN488-7_5.tif:0009-0665	0.954	131.154	0	546	32.947	68.128	0.892	125.101	11935	1.45	0.69	0.901	1.13768
161	TTBK2_KAN488-7_5.tif:0010-0782	0.797	81.118	0	315	87.268	80.11	0.819	64.621	6165	1.149	0.87	0.884	0.587667
162	TTBK2_KAN488-7_5.tif:0011-0806	1.352	115.163	0	822	48.695	82.522	0.823	155.718	14856	1.332	0.751	0.89	1.41612
163	TTBK2_KAN488-7_6.tif:0001-0218	1.426	123.529	0	850	44.762	22.284	0.751	176.095	16800	1.727	0.579	0.837	1.60143
164	TTBK2_KAN488-7_6.tif:0002-0222	1.059	150.832	0	644	113.585	22.701	0.9	159.681	15234	1.314	0.761	0.931	1.45215
165	TTBK2_KAN488-7_6.tif:0003-0266	0.901	89.093	0	520	57.095	27.314	0.827	80.312	7662	1.691	0.592	0.92	0.730366
166	TTBK2_KAN488-7_6.tif:0004-0387	1.09	157.875	0	902	115.396	39.595	0.861	172.102	16419	1.436	0.696	0.897	1.56511
167	TTBK2_KAN488-7_6.tif:0005-0622	0.65	119	0	412	84.819	63.669	0.858	77.335	7378	1.349	0.741	0.886	0.703294
										10490.6				1
168	TTBK2_KAN488-8_1.tif:0001-0070	0.818	47.474	0	119	67.276	7.16	0.74	38.814	3703	2.13	0.47	0.843	0.352982
169	TTBK2_KAN488-8_1.tif:0002-0128	0.692	16.955	0	69	130.153	13.181	0.949	11.729	1119	1.162	0.861	0.917	0.106667
170	TTBK2_KAN488-8_1.tif:0003-0289	0.818	100.244	0	337	104.014	29.622	0.841	81.958	7819	1.385	0.722	0.897	0.745332
171	TTBK2_KAN488-8_1.tif:0004-0361	1.048	162.04	0	992	31.036	36.947	0.838	169.848	16204	1.511	0.662	0.93	1.54462
172	TTBK2_KAN488-8_1.tif:0005-0388	0.912	2.724	0	10	58.332	39.775	0.853	2.484	237	1.704	0.587	0.883	0.0225916
173	TTBK2_KAN488-8_1.tif:0006-0496	0.88	115.667	0	556	130.491	50.824	0.893	101.842	9716	1.178	0.849	0.908	0.92616
174	TTBK2_KAN488-8_1.tif:0007-0652	0.964	99.783	0	433	100.163	66.828	0.761	96.223	9180	1.815	0.551	0.872	0.875067
175	TTBK2_KAN488-8_1.tif:0008-0717	0.996	16.642	0	101	46.844	73.435	0.723	16.572	1581	2.026	0.494	0.833	0.150706
176	TTBK2_KAN488-8_1.tif:0009-0868	0.744	30.817	0	135	32.438	88.84	0.821	22.934	2188	1.532	0.653	0.877	0.208567
177	TTBK2_KAN488-8_2.tif:0001-0276	1.122	69.112	0	349	35.732	28.245	0.683	77.513	7395	1.833	0.545	0.833	0.704915
178	TTBK2_KAN488-8_2.tif:0002-0285	0.765	92.342	0	298	7.821	29.223	0.907	70.658	6741	1.211	0.825	0.89	0.642573
179	TTBK2_KAN488-8_2.tif:0003-0361	0.723	60.507	0	323	118.791	36.925	0.939	43.762	4175	1.262	0.792	0.902	0.397974
180	TTBK2_KAN488-8_2.tif:0004-0545	1.415	91.933	0	599	73.759	55.712	0.772	130.09	12411	1.409	0.709	0.852	1.18306
181	TTBK2_KAN488-8_2.tif:0005-0678	0.776	76.73	0	336	49.814	69.412	0.92	59.516	5678	1.324	0.755	0.881	0.541245
182	TTBK2_KAN488-8_2.tif:0006-0910	0.744	135.676	0	564	5.036	93.248	0.896	100.972	9633	1.482	0.675	0.928	0.918248
183	TTBK2_KAN488-8_2.tif:0007-1014	0.776	74.149	0	243	128.97	103.816	0.9	57.514	5487	1.161	0.861	0.908	0.523038
184	TTBK2_KAN488-8_3.tif:0001-0108	0.901	94.395	0	445	94.149	11.032	0.884	85.092	8118	1.212	0.825	0.901	0.773833
185	TTBK2_KAN488-8_3.tif:0002-0333	1.08	159.573	0	891	129.498	34.153	0.878	172.28	16436	1.487	0.672	0.912	1.56673
186	TTBK2_KAN488-8_3.tif:0003-0359	0.734	81.071	0	414	55.689	36.73	0.883	59.485	5675	1.213	0.824	0.875	0.540959
187	TTBK2_KAN488-8_3.tif:0004-0396	1.038	89.808	0	472	29.773	40.657	0.844	93.194	8891	1.343	0.745	0.904	0.847518
188	TTBK2_KAN488-8_3.tif:0005-0473	0.828	4.19	0	18	112.024	48.356	0.682	3.469	331	1.735	0.576	0.802	0.031552
189	TTBK2_KAN488-8_3.tif:0006-0525	0.65	55.258	0	317	100.423	53.771	0.892	35.911	3426	1.321	0.757	0.892	0.326577
190	TTBK2_KAN488-8_3.tif:0007-0866	0.88	186.607	0	914	127.312	88.714	0.906	164.303	15675	1.423	0.703	0.933	1.49419
191	TTBK2_KAN488-8_3.tif:0008-0885	1.069	100.314	0	588	71.417	90.666	0.881	107.25	10232	1.594	0.627	0.944	0.975347
192	TTBK2_KAN488-8_4.tif:0001-0112	0.985	117.755	0	451	34.09	11.533	0.922	116.024	11069	1.191	0.839	0.926	1.05513
193	TTBK2_KAN488-8_4.tif:0002-0110	0.681	88.246	0	462	86.947	11.252	0.701	60.124	5736	2.247	0.445	0.839	0.546774
194	TTBK2_KAN488-8_4.tif:0003-0277	0.891	123	0	423	109.502	28.36	0.861	109.588	10455	1.309	0.764	0.885	0.996604
195	TTBK2_KAN488-8_4.tif:0004-0302	0.839	79.737	0	325	16.819	30.965	0.939	66.864	6379	1.118	0.895	0.947	0.608066
196	TTBK2_KAN488-8_4.tif:0005-0364	1.111	125.142	0	596	135.413	37.26	0.877	139.042	13265	1.477	0.677	0.922	1.26446
197	TTBK2_KAN488-8_4.tif:0006-0584	0.933	156.596	0	753	65.512	59.775	0.885	146.086	13937	1.112	0.9	0.918	1.32852
198	TTBK2_KAN488-8_4.tif:0007-0633	0.839	116.062	0	457	15.489	64.779	0.822	97.324	9285	1.034	0.967	0.86	0.885076
199	TTBK2_KAN488-8_4.tif:0008-0649	0.86	149.207	0	528	133.023	66.484	0.948	128.246	12235	1.214	0.824	0.911	1.16628
200	TTBK2_KAN488-8_4.tif:0009-0723	0.922	141.841	0	738	71.209	74.067	0.892	130.835	12482	1.07	0.935	0.88	1.18982
201	TTBK2_KAN488-8_4.tif:0010-0780	1.174	172.366	0	1251	40.986	79.863	0.838	202.352	19305	1.298	0.77	0.885	1.84021
202	TTBK2_KAN488-8_4.tif:0011-0980	1.08	88.427	0	410	72.939	100.406	0.685	95.469	9108	1.535	0.652	0.789	0.868203
203	TTBK2_KAN488-8_5.tif:0001-0210	1.53	2.932	0	14	129.777	21.438	0.733	4.486	428	2.03	0.493	0.859	0.0407983
204	TTBK2_KAN488-8_5.tif:0002-0229	0.65	58.226	0	306	9.81	23.43	0.928	37.84	3610	1.325	0.755	0.899	0.344117
205	TTBK2_KAN488-8_5.tif:0003-0360	0.87	46.771	0	122	28.174	36.891	0.946	40.691	3882	1.11	0.901	0.907	0.370044
206	TTBK2_KAN488-8_5.tif:0004-0523	0.65	16.177	0	80	88.269	53.491	0.771	10.513	1003	1.614	0.62	0.827	0.0956091
207	TTBK2_KAN488-8_5.tif:0005-0582	0.912	67.264	0	320	31.073	59.636	0.912	61.34	5852	1.394	0.717	0.897	0.557831
208	TTBK2_KAN488-8_5.tif:0006-0712	1.226	70.496	0	677	58.588	72.872	0.866	86.454	8248	1.442	0.694	0.886	0.786225
209	TTBK2_KAN488-8_5.tif:0007-0819	1.289	125.569	0	927	74.234	83.791	0.806	161.892	15445	1.422	0.703	0.879	1.47227
210	TTBK2_KAN488-8_6.tif:0001-0087	1.048	78.95	0	386	75.454	9.023	0.88	82.754	7895	1.342	0.745	0.909	0.752576
211	TTBK2_KAN488-8_6.tif:0002-0430	0.713	17.588	0	64	77.09	43.989	0.905	12.536	1196	1.327	0.754	0.932	0.114006
212	TTBK2_KAN488-8_6.tif:0003-0434	0.849	78.222	0	344	44.598	44.534	0.832	66.413	6336	1.393	0.718	0.885	0.603968
213	TTBK2_KAN488-8_6.tif:0004-0470	0.713	25.191	0	194	92.625	48.188	0.905	17.955	1713	1.076	0.929	0.925	0.163289
214	TTBK2_KAN488-8_6.tif:0005-0504	0.901	26.988	0	246	10.526	51.599	0.776	24.328	2321	1.537	0.651	0.887	0.221245
215	TTBK2_KAN488-8_6.tif:0006-0767	0.943	82.278	0	537	61.931	78.551	0.792	77.618	7405	1.73	0.578	0.849	0.705868
216	TTBK2_KAN488-8_6.tif:0007-0868	0.901	145.558	0	658	90.74	88.918	0.712	131.212	12518	1.676	0.597	0.847	1.19326
217	TTBK2_KAN488-8_6.tif:0008-1031	1.017	121.814	0	951	112.779	105.636	0.853	123.854	11816	1.328	0.753	0.886	1.12634
										7699.5				0.733941
218	TTBK2_KAN488-9_1.tif:0001-0077	0.807	65.584	0	223	37.083	7.903	0.78	52.933	5050	1.703	0.587	0.832	0.481382
219	TTBK2_KAN488-9_1.tif:0002-0286	0.723	49.014	1	144	53.12	29.23	0.884	35.45	3382	1.355	0.738	0.945	0.322383
220	TTBK2_KAN488-9_1.tif:0003-0645	0.786	138.493	0	349	88.981	66.128	0.912	108.875	10387	1.365	0.732	0.938	0.990122
221	TTBK2_KAN488-9_1.tif:0004-0867	0.65	71.71	0	388	30.519	88.842	0.892	46.602	4446	1.802	0.555	0.925	0.423807
222	TTBK2_KAN488-9_1.tif:0005-1029	0.797	135.658	0	573	139.924	105.341	0.808	108.068	10310	1.617	0.618	0.854	0.982782
223	TTBK2_KAN488-9_2.tif:0001-0205	0.964	146.043	0	590	128.73	20.948	0.785	140.834	13436	1.414	0.707	0.848	1.28076
224	TTBK2_KAN488-9_2.tif:0002-0227	0.692	107.758	0	347	73.589	23.312	0.737	74.547	7112	1.734	0.577	0.835	0.677938
225	TTBK2_KAN488-9_2.tif:0003-0443	0.901	154.058	0	720	93.048	45.385	0.855	138.874	13249	1.488	0.672	0.91	1.26294
226	TTBK2_KAN488-9_2.tif:0004-0802	0.849	60.716	0	253	57.766	82.115	0.891	51.55	4918	1.206	0.829	0.876	0.468799
227	TTBK2_KAN488-9_3.tif:0001-0095	0.818	145.321	0	572	4.893	9.814	0.935	118.812	11335	1.305	0.766	0.912	1.08049
228	TTBK2_KAN488-9_3.tif:0002-0128	0.87	84.434	0	203	60.658	13.199	0.895	73.457	7008	1.287	0.777	0.917	0.668025
229	TTBK2_KAN488-9_3.tif:0003-0233	1.268	77.083	0	592	59.804	23.911	0.733	97.764	9327	1.536	0.651	0.861	0.889079
230	TTBK2_KAN488-9_3.tif:0004-0490	0.86	89.866	0	321	96.569	50.149	0.831	77.241	7369	1.294	0.773	0.832	0.702436
231	TTBK2_KAN488-9_3.tif:0005-0550	1.048	68.25	0	363	58.863	56.387	0.708	71.539	6825	2.568	0.389	0.926	0.650581
232	TTBK2_KAN488-9_3.tif:0006-0710	1.153	97.791	0	318	38.153	72.75	0.814	112.753	10757	1.3	0.769	0.866	1.02539
233	TTBK2_KAN488-9_3.tif:0007-0761	0.849	107.79	0	563	128.126	77.939	0.79	91.517	8731	1.993	0.502	0.942	0.832266
234	TTBK2_KAN488-9_3.tif:0008-0887	0.629	18.467	0	226	27.119	90.868	0.877	11.614	1108	1.21	0.826	0.909	0.105618
235	TTBK2_KAN488-9_3.tif:0009-0903	0.86	96.232	0	399	89.143	92.48	0.915	82.712	7891	1.34	0.746	0.937	0.752195
236	TTBK2_KAN488-9_3.tif:0010-0979	1.059	94.287	0	734	65.442	100.22	0.735	99.819	9523	1.808	0.553	0.874	0.907762
237	TTBK2_KAN488-9_4.tif:0001-0261	0.65	213.355	7	784	19.807	26.811	0.754	138.654	13228	1.311	0.763	0.832	1.26093
238	TTBK2_KAN488-9_4.tif:0002-0491	1.195	121.553	0	687	89.775	50.221	0.864	145.247	13857	1.273	0.786	0.962	1.32089
239	TTBK2_KAN488-9_4.tif:0003-0576	1.101	151.362	0	734	36.459	58.933	0.907	166.588	15893	1.17	0.855	0.95	1.51497
240	TTBK2_KAN488-9_4.tif:0004-0723	0.839	93.8	0	364	70.758	74.02	0.925	78.656	7504	1.167	0.857	0.914	0.715305
241	TTBK2_KAN488-9_4.tif:0005-0762	1.258	125.958	0	857	94.955	78.008	0.67	158.433	15115	2.158	0.463	0.8	1.44081
242	TTBK2_KAN488-9_4.tif:0006-0897	0.734	31.971	0	290	38.953	91.903	0.883	23.458	2238	1.197	0.835	0.909	0.213333
243	TTBK2_KAN488-9_5.tif:0001-0007	1.006	102.042	0	653	7.106	0.739	0.883	102.68	9796	1.511	0.662	0.919	0.933786
244	TTBK2_KAN488-9_5.tif:0002-0267	1.268	103.645	0	483	66.313	27.356	0.689	131.453	12541	1.505	0.665	0.826	1.19545
245	TTBK2_KAN488-9_5.tif:0003-0297	0.639	66.721	0	218	5.973	30.43	0.77	42.661	4070	1.444	0.693	0.853	0.387965
246	TTBK2_KAN488-9_5.tif:0004-0300	0.723	33.145	0	102	130.591	30.727	0.976	23.972	2287	1.111	0.9	0.908	0.218004
247	TTBK2_KAN488-9_5.tif:0005-0790	1.3	159.081	0	961	111.618	80.896	0.834	206.765	19726	1.451	0.689	0.886	1.88034
248	TTBK2_KAN488-9_5.tif:0006-1017	0.671	102.016	0	332	62.484	104.195	0.958	68.436	6529	1.093	0.915	0.901	0.622365
249	TTBK2_KAN488-9_6.tif:0001-0026	0.891	46.647	0	245	129.168	2.593	0.771	41.561	3965	1.491	0.671	0.842	0.377956
250	TTBK2_KAN488-9_6.tif:0002-0071	0.88	95.143	0	323	68.334	7.271	0.957	83.771	7992	1.068	0.936	0.903	0.761823
251	TTBK2_KAN488-9_6.tif:0003-0111	1.09	117.865	0	759	83.883	11.315	0.85	128.487	12258	1.381	0.724	0.87	1.16847
252	TTBK2_KAN488-9_6.tif:0004-0302	0.996	145.758	0	805	57.401	30.883	0.873	145.142	13847	1.275	0.784	0.913	1.31994
253	TTBK2_KAN488-9_6.tif:0005-0317	1.101	137.324	0	706	138.868	32.468	0.869	151.138	14419	1.323	0.756	0.905	1.37446
254	TTBK2_KAN488-9_6.tif:0006-0420	0.639	51.902	0	303	25.323	43.061	0.877	33.186	3166	1.173	0.853	0.878	0.301793
255	TTBK2_KAN488-9_6.tif:0007-0528	1.394	127.797	0	548	112.031	53.995	0.724	178.16	16997	1.533	0.652	0.855	1.62021
256	TTBK2_KAN488-9_6.tif:0008-0605	0.765	140.959	0	531	4.543	61.92	0.921	107.858	10290	1.223	0.817	0.918	0.980875
257	TTBK2_KAN488-9_6.tif:0009-0680	0.943	111.478	0	572	108.052	69.609	0.854	105.164	10033	1.353	0.739	0.878	0.956377
258	TTBK2_KAN488-9_6.tif:0010-0747	1.017	122.804	0	457	79.283	76.526	0.951	124.86	11912	1.027	0.973	0.924	1.13549
259	TTBK2_KAN488-9_6.tif:0011-0882	1.09	156.154	0	777	138.449	90.293	0.887	170.225	16240	1.279	0.782	0.912	1.54805
260	TTBK2_KAN488-9_6.tif:0012-0936	1.048	145.55	0	763	103.459	95.837	0.891	152.563	14555	1.211	0.826	0.935	1.38743
										9549.35				0.910274
1	TTBK2_KAN488-10_1.tif:0001-0066	1.048	103.31	0	558	139.672	6.785	0.807	108.288	10331	1.202	0.832	0.851	0.984784
2	TTBK2_KAN488-10_1.tif:0002-0213	1.331	108	0	599	36.715	21.864	0.836	143.769	13716	1.426	0.701	0.864	1.30745
3	TTBK2_KAN488-10_1.tif:0003-0413	1.027	38.714	0	490	70.617	42.277	0.659	39.768	3794	1.51	0.662	0.803	0.361656
4	TTBK2_KAN488-10_1.tif:0004-0435	0.734	133.657	4	482	24.38	44.564	0.953	98.068	9356	1.247	0.802	0.909	0.891843
5	TTBK2_KAN488-10_1.tif:0005-0466	0.723	85.667	0	386	138.906	47.783	0.827	61.958	5911	1.671	0.599	0.863	0.563455
6	TTBK2_KAN488-10_1.tif:0006-0564	0.755	22.681	0	121	45.811	57.767	0.82	17.117	1633	1.708	0.585	0.852	0.155663
7	TTBK2_KAN488-10_1.tif:0007-0686	0.807	40.805	0	383	24.756	70.132	0.765	32.934	3142	1.585	0.631	0.875	0.299505
8	TTBK2_KAN488-10_1.tif:0008-0814	1.153	211.336	0	1136	129.997	83.289	0.883	243.672	23247	1.312	0.762	0.932	2.21598
9	TTBK2_KAN488-10_1.tif:0009-0869	1.143	152.468	0	836	102.882	88.828	0.725	174.198	16619	1.484	0.674	0.807	1.58418
10	TTBK2_KAN488-10_1.tif:0010-0920	0.828	73.975	0	343	94.51	94.152	0.882	61.256	5844	1.576	0.634	0.929	0.557069
11	TTBK2_KAN488-10_1.tif:0011-0954	1.069	56.765	0	339	61.36	97.68	0.844	60.69	5790	1.424	0.702	0.923	0.551921
12	TTBK2_KAN488-10_2.tif:0001-0026	0.86	60.659	0	207	88.326	2.696	0.843	52.137	4974	1.549	0.645	0.901	0.474137
13	TTBK2_KAN488-10_2.tif:0002-0096	0.702	141.015	0	499	67.187	9.88	0.892	99.033	9448	1.339	0.747	0.918	0.900613
14	TTBK2_KAN488-10_2.tif:0003-0179	1.101	42.733	0	139	41.598	18.374	0.663	47.032	4487	2.226	0.449	0.817	0.427715
15	TTBK2_KAN488-10_2.tif:0004-0348	1.027	111.02	0	496	99.222	35.653	0.918	114.043	10880	1.35	0.741	0.907	1.03712
16	TTBK2_KAN488-10_2.tif:0005-0455	0.933	127.36	0	567	29.141	46.624	0.818	118.812	11335	1.55	0.645	0.881	1.08049
17	TTBK2_KAN488-10_2.tif:0006-0498	0.786	100.84	0	486	127.57	51.071	0.837	79.274	7563	1.289	0.776	0.898	0.720929
18	TTBK2_KAN488-10_2.tif:0007-0609	1.038	124.465	0	632	70.684	62.302	0.809	129.157	12322	1.367	0.732	0.861	1.17457
19	TTBK2_KAN488-10_2.tif:0008-0954	0.828	95.291	0	408	24.604	97.688	0.982	78.907	7528	1.059	0.945	0.929	0.717593
20	TTBK2_KAN488-10_3.tif:0001-0027	0.681	60.338	0	350	103.965	2.757	0.885	41.11	3922	1.468	0.681	0.861	0.373857
21	TTBK2_KAN488-10_3.tif:0002-0059	0.629	72.6	0	252	6.672	6.145	0.877	45.659	4356	1.226	0.816	0.93	0.415228
22	TTBK2_KAN488-10_3.tif:0003-0062	0.713	59.309	0	523	68.972	6.358	0.858	42.273	4033	1.321	0.757	0.889	0.384438
23	TTBK2_KAN488-10_3.tif:0004-0122	1.143	98.927	0	639	92.578	12.486	0.85	113.026	10783	1.417	0.706	0.92	1.02787
24	TTBK2_KAN488-10_3.tif:0005-0238	0.755	54.417	0	386	83.405	24.306	0.909	41.068	3918	1.13	0.885	0.911	0.373476
25	TTBK2_KAN488-10_3.tif:0006-0430	1.143	82.119	0	624	114.678	43.979	0.865	93.823	8951	1.439	0.695	0.905	0.853238
26	TTBK2_KAN488-10_3.tif:0007-0490	0.818	98.372	0	443	19.588	50.218	0.902	80.427	7673	1.295	0.772	0.907	0.731415
27	TTBK2_KAN488-10_3.tif:0008-0626	1.122	127.467	0	624	139.641	64.137	0.839	142.962	13639	1.287	0.777	0.87	1.30011
28	TTBK2_KAN488-10_3.tif:0009-0856	0.66	16.889	0	60	37.526	87.623	0.728	11.153	1064	1.779	0.562	0.834	0.101424
29	TTBK2_KAN488-10_3.tif:0010-0881	1.163	175.505	0	842	126.139	90.229	0.918	204.197	19481	1.152	0.868	0.941	1.85699
30	TTBK2_KAN488-10_3.tif:0011-1018	0.786	135.133	0	572	55.532	104.19	0.809	106.234	10135	1.729	0.578	0.888	0.9661
31	TTBK2_KAN488-10_4.tif:0001-0049	0.849	65.235	0	371	95.039	5.001	0.832	55.386	5284	1.612	0.62	0.89	0.503688
32	TTBK2_KAN488-10_4.tif:0002-0122	1.143	101.294	0	518	47.528	12.491	0.83	115.73	11041	1.337	0.748	0.865	1.05246
33	TTBK2_KAN488-10_4.tif:0003-0135	1.247	111.723	0	747	76.211	13.873	0.856	139.356	13295	1.596	0.626	0.93	1.26732
34	TTBK2_KAN488-10_4.tif:0004-0252	1.111	21.094	0	284	111.589	25.778	0.784	23.437	2236	1.396	0.717	0.851	0.213143
35	TTBK2_KAN488-10_4.tif:0005-0412	1.017	139.258	0	521	62.751	42.165	0.747	141.589	13508	1.771	0.565	0.858	1.28763
36	TTBK2_KAN488-10_4.tif:0006-0851	0.975	40.516	0	315	56.006	87.188	0.818	39.496	3768	1.307	0.765	0.865	0.359178
37	TTBK2_KAN488-10_4.tif:0007-0958	1.247	147.714	0	705	111.901	98.095	0.819	184.25	17578	1.772	0.564	0.952	1.67559
38	TTBK2_KAN488-10_5.tif:0001-0146	1.059	90.683	0	420	70.368	14.999	0.778	96.003	9159	1.398	0.715	0.871	0.873065
39	TTBK2_KAN488-10_5.tif:0002-0455	0.839	66.475	0	438	14.959	46.627	0.875	55.743	5318	1.267	0.789	0.947	0.506929
40	TTBK2_KAN488-10_5.tif:0003-0468	1.017	158.392	0	830	106.221	47.93	0.827	161.043	15364	1.336	0.748	0.866	1.46454
41	TTBK2_KAN488-10_5.tif:0004-0557	0.922	94.773	0	522	34.241	57.046	0.824	87.419	8340	1.589	0.629	0.876	0.794995
42	TTBK2_KAN488-10_5.tif:0005-0667	0.713	36.397	0	168	99.824	68.351	0.941	25.943	2475	1.03	0.971	0.932	0.235925
43	TTBK2_KAN488-10_5.tif:0006-0772	0.734	12.843	0	79	68.763	79.048	0.87	9.423	899	1.371	0.73	0.854	0.0856955
44	TTBK2_KAN488-10_5.tif:0007-0796	1.069	110.647	0	617	53.374	81.459	0.897	118.298	11286	1.408	0.71	0.915	1.07582
45	TTBK2_KAN488-10_5.tif:0008-0966	1.048	70.24	0	358	11.925	98.858	0.907	73.625	7024	1.401	0.714	0.913	0.66955
46	TTBK2_KAN488-10_5.tif:0009-1025	1.258	180.35	0	767	125.694	104.974	0.941	226.848	21642	1.204	0.83	0.92	2.06298
47	TTBK2_KAN488-10_6.tif:0001-0023	1.247	173.983	0	1148	141.592	2.324	0.842	217.016	20704	1.35	0.741	0.919	1.97357
48	TTBK2_KAN488-10_6.tif:0002-0033	0.702	39.269	0	180	80.662	3.45	0.927	27.578	2631	1.565	0.639	0.944	0.250795
49	TTBK2_KAN488-10_6.tif:0003-0313	0.776	29.865	0	234	69.81	32.059	0.887	23.165	2210	1.277	0.783	0.886	0.210664
50	TTBK2_KAN488-10_6.tif:0004-0344	0.713	55.515	0	231	132.818	35.218	0.926	39.569	3775	1.429	0.7	0.901	0.359845
51	TTBK2_KAN488-10_6.tif:0005-0372	0.985	106.691	0	595	38.775	38.078	0.737	105.123	10029	2.091	0.478	0.836	0.955996
52	TTBK2_KAN488-10_6.tif:0006-0390	1.059	126.426	0	724	113.533	39.883	0.825	133.843	12769	1.61	0.621	0.878	1.21718
53	TTBK2_KAN488-10_6.tif:0007-0595	0.912	85.115	0	451	38.079	60.905	0.877	77.618	7405	1.216	0.822	0.935	0.705868
54	TTBK2_KAN488-10_6.tif:0008-0629	0.692	77.864	0	336	106.039	64.458	0.949	53.866	5139	1.208	0.828	0.917	0.489866
55	TTBK2_KAN488-10_6.tif:0009-0750	1.017	125.464	0	551	82.055	76.811	0.869	127.564	12170	1.208	0.828	0.874	1.16008
56	TTBK2_KAN488-10_6.tif:0010-0937	1.268	95.694	0	499	55.576	95.951	0.699	121.369	11579	1.489	0.672	0.818	1.10375
										8794.7				0.838338
57	TTBK2_KAN488-11_1.tif:0001-0142	1.279	118.336	0	763	51.591	14.492	0.742	151.327	14437	1.985	0.504	0.847	1.37618
58	TTBK2_KAN488-11_1.tif:0002-0219	0.723	48.348	0	316	12.54	22.406	0.81	34.967	3336	1.744	0.573	0.908	0.317998
59	TTBK2_KAN488-11_1.tif:0003-0229	1.499	75.196	0	622	50.466	23.478	0.79	112.711	10753	1.662	0.602	0.867	1.02501
60	TTBK2_KAN488-11_1.tif:0004-0239	0.943	67.367	0	296	84.124	24.53	0.838	63.552	6063	1.227	0.815	0.918	0.577944
61	TTBK2_KAN488-11_1.tif:0005-0441	0.702	51.358	0	197	61.267	45.192	1	36.068	3441	1.166	0.858	0.924	0.328007
62	TTBK2_KAN488-11_1.tif:0006-0560	1.017	49.505	0	238	121.703	57.347	0.853	50.334	4802	1.247	0.802	0.894	0.457742
63	TTBK2_KAN488-11_1.tif:0007-0891	1.394	123.789	0	685	113.118	91.354	0.788	172.573	16464	1.274	0.785	0.866	1.5694
64	TTBK2_KAN488-11_2.tif:0001-0207	1.069	85.647	0	461	70.415	21.241	0.834	91.57	8736	1.709	0.585	0.899	0.832743
65	TTBK2_KAN488-11_2.tif:0002-0235	0.87	55.133	0	279	19.481	24.008	0.882	47.965	4576	1.184	0.845	0.892	0.436199
66	TTBK2_KAN488-11_2.tif:0003-0338	0.723	56.188	0	196	61.653	34.634	0.939	40.638	3877	1.349	0.741	0.902	0.369568
67	TTBK2_KAN488-11_2.tif:0004-0581	0.744	135.31	8	427	9.304	59.49	0.821	100.699	9607	1.423	0.703	0.85	0.91577
68	TTBK2_KAN488-11_2.tif:0005-0592	0.765	57.658	0	333	47.675	60.657	0.907	44.118	4209	1.374	0.728	0.885	0.401215
69	TTBK2_KAN488-11_2.tif:0006-0710	1.059	44.792	0	308	121.103	72.677	0.698	47.42	4524	1.713	0.584	0.821	0.431242
70	TTBK2_KAN488-11_2.tif:0007-0914	1.174	103.536	0	584	133.549	93.591	0.915	121.548	11596	1.238	0.808	0.914	1.10537
71	TTBK2_KAN488-11_2.tif:0008-0924	1.09	72.644	0	375	34.153	94.623	0.861	79.19	7555	1.141	0.876	0.904	0.720166
72	TTBK2_KAN488-11_3.tif:0001-0282	0.713	45.147	0	238	87.061	28.871	0.858	32.179	3070	1.27	0.787	0.872	0.292642
73	TTBK2_KAN488-11_3.tif:0002-0450	0.755	78.667	0	278	54.546	46.066	0.996	59.369	5664	1.232	0.812	0.954	0.53991
74	TTBK2_KAN488-11_3.tif:0003-0523	0.87	54.169	0	212	108.348	53.605	0.913	47.126	4496	1.476	0.678	0.907	0.428573
75	TTBK2_KAN488-11_3.tif:0004-0797	1.426	67.971	0	480	84.26	81.762	0.68	96.894	9244	1.42	0.704	0.842	0.881167
76	TTBK2_KAN488-11_3.tif:0005-0843	0.901	47.488	0	218	58.519	86.389	0.816	42.808	4084	1.348	0.742	0.86	0.3893
77	TTBK2_KAN488-11_3.tif:0006-0938	1.53	91.5	0	409	32.623	96.001	0.768	140.027	13359	1.662	0.602	0.861	1.27342
78	TTBK2_KAN488-11_4.tif:0001-0023	0.954	129.549	0	628	101.261	2.311	0.8	123.571	11789	1.761	0.568	0.875	1.12376
79	TTBK2_KAN488-11_4.tif:0002-0234	0.807	22.299	0	118	57.621	24.064	0.859	17.997	1717	1.507	0.664	0.917	0.16367
80	TTBK2_KAN488-11_4.tif:0003-0246	1.08	46.311	0	424	84.721	25.22	0.923	49.998	4770	1.215	0.823	0.9	0.454691
81	TTBK2_KAN488-11_4.tif:0004-0316	0.65	36.032	0	197	40.923	32.392	0.754	23.416	2234	1.991	0.502	0.861	0.212952
82	TTBK2_KAN488-11_4.tif:0005-0325	0.681	66.523	0	222	106.664	33.303	0.914	45.324	4324	1.453	0.688	0.97	0.412177
83	TTBK2_KAN488-11_4.tif:0006-0375	0.681	21.708	0	249	5.429	38.471	0.951	14.79	1411	1.159	0.863	0.949	0.134501
84	TTBK2_KAN488-11_4.tif:0007-0442	0.807	117.792	0	341	95.236	45.314	0.937	95.07	9070	1.251	0.799	0.933	0.864581
85	TTBK2_KAN488-11_4.tif:0008-0631	1.258	32.583	0	224	120.728	64.63	0.738	40.984	3910	1.698	0.589	0.87	0.372714
86	TTBK2_KAN488-11_4.tif:0009-0646	0.86	81.659	0	285	56.528	66.164	0.744	70.187	6696	1.846	0.542	0.85	0.638284
87	TTBK2_KAN488-11_4.tif:0010-0856	0.776	68.243	0	380	70.134	87.718	0.934	52.933	5050	1.359	0.736	0.925	0.481382
88	TTBK2_KAN488-11_4.tif:0011-0870	1.09	236.933	0	1017	92.306	89.079	0.887	258.283	24641	1.077	0.929	0.912	2.34886
89	TTBK2_KAN488-11_4.tif:0012-0934	0.681	35.077	0	126	30.063	95.686	0.973	23.899	2280	1.078	0.928	0.909	0.217337
90	TTBK2_KAN488-11_5.tif:0001-0268	0.818	175.705	0	823	130.085	27.527	0.902	143.654	13705	1.444	0.693	0.923	1.3064
91	TTBK2_KAN488-11_5.tif:0002-0304	0.818	64.846	0	384	7.444	31.129	0.949	53.017	5058	1.126	0.888	0.934	0.482145
92	TTBK2_KAN488-11_5.tif:0003-0331	0.765	54.781	0	177	92.278	33.938	0.936	41.917	3999	1.117	0.895	0.954	0.381197
93	TTBK2_KAN488-11_5.tif:0004-0742	0.744	40.282	0	312	66.721	75.977	0.966	29.978	2860	1.134	0.882	0.904	0.272624
94	TTBK2_KAN488-11_5.tif:0005-0919	1.027	97.408	0	496	36.831	94.084	0.857	100.06	9546	1.401	0.714	0.951	0.909955
95	TTBK2_KAN488-11_5.tif:0006-0955	0.755	11.097	0	59	109.4	97.767	0.943	8.375	799	1.127	0.888	0.911	0.0761632
96	TTBK2_KAN488-11_5.tif:0007-0997	0.828	155.506	0	574	15.682	102.17	0.785	128.77	12285	1.948	0.513	0.903	1.17104
97	TTBK2_KAN488-11_5.tif:0008-0995	0.839	99.763	0	294	103.219	101.883	0.862	83.656	7981	1.433	0.698	0.925	0.760774
98	TTBK2_KAN488-11_6.tif:0001-0071	0.713	31.809	0	145	116.272	7.281	0.858	22.672	2163	1.09	0.917	0.883	0.206184
99	TTBK2_KAN488-11_6.tif:0002-0107	0.891	15.506	0	144	80.512	10.937	0.833	13.815	1318	1.36	0.736	0.876	0.125636
100	TTBK2_KAN488-11_6.tif:0003-0227	1.688	99.404	0	727	44.745	23.215	0.8	167.752	16004	1.423	0.703	0.859	1.52555
101	TTBK2_KAN488-11_6.tif:0004-0337	0.86	112.463	0	542	100.451	34.542	0.778	96.664	9222	1.464	0.683	0.863	0.87907
102	TTBK2_KAN488-11_6.tif:0005-0488	0.839	38.375	0	166	127.117	50.018	0.925	32.179	3070	1.382	0.723	0.92	0.292642
103	TTBK2_KAN488-11_6.tif:0006-0692	0.797	132.092	2	393	139.295	70.8	0.879	105.227	10039	1.123	0.891	0.905	0.956949
104	TTBK2_KAN488-11_6.tif:0007-0763	1.572	95.227	0	643	108.09	78.142	0.809	149.723	14284	1.818	0.55	0.888	1.3616
105	TTBK2_KAN488-11_6.tif:0008-0779	0.891	65.176	0	338	76.769	79.802	0.935	58.069	5540	1.124	0.889	0.909	0.52809
106	TTBK2_KAN488-11_6.tif:0009-0894	1.226	73.974	0	477	66.28	91.445	0.766	90.72	8655	1.667	0.6	0.867	0.825022
107	TTBK2_KAN488-11_6.tif:0010-0899	0.985	134.84	0	479	128.147	92.105	0.812	132.858	12675	1.539	0.65	0.908	1.20822
										7274.27				0.693407
108	TTBK2_KAN488-12_1.tif:0001-0071	0.734	175.071	0	643	141.006	7.363	0.864	128.455	12255	1.594	0.627	0.966	1.16819
109	TTBK2_KAN488-12_1.tif:0002-0155	0.755	76.097	0	371	74.577	15.903	0.895	57.43	5479	1.231	0.812	0.862	0.522276
110	TTBK2_KAN488-12_1.tif:0003-0214	0.954	26.626	0	336	48.63	21.953	0.905	25.398	2423	1.396	0.716	0.924	0.230968
111	TTBK2_KAN488-12_1.tif:0004-0488	0.66	129.984	0	389	102.107	49.933	0.906	85.836	8189	1.426	0.701	0.906	0.780601
112	TTBK2_KAN488-12_1.tif:0005-0913	0.828	9.962	0	123	126.006	93.535	0.869	8.249	787	1.172	0.853	0.873	0.0750193
113	TTBK2_KAN488-12_1.tif:0006-0971	0.65	15.823	0	77	111.397	99.437	0.812	10.283	981	1.419	0.705	0.867	0.093512
114	TTBK2_KAN488-12_2.tif:0001-0234	0.639	86.131	0	269	41.697	23.978	0.731	55.072	5254	1.411	0.709	0.787	0.500828
115	TTBK2_KAN488-12_3.tif:0001-0140	1.174	90.312	0	502	47.711	14.302	0.664	106.024	10115	2.11	0.474	0.818	0.964194
116	TTBK2_KAN488-12_3.tif:0002-0464	0.713	130.868	0	429	58.947	47.556	0.699	93.278	8899	1.892	0.529	0.8	0.848281
117	TTBK2_KAN488-12_3.tif:0003-0620	0.65	58.742	0	205	124.14	63.506	0.812	38.175	3642	1.347	0.742	0.838	0.347167
118	TTBK2_KAN488-12_3.tif:0004-0633	0.744	74.465	0	456	15.329	64.806	0.833	55.418	5287	1.427	0.701	0.899	0.503974
119	TTBK2_KAN488-12_3.tif:0005-0923	0.88	113.643	0	547	113.445	94.494	0.875	100.06	9546	1.65	0.606	0.955	0.909955
120	TTBK2_KAN488-12_6.tif:0001-0280	0.629	12.2	0	112	35.137	28.692	0.993	7.673	732	1.166	0.857	0.93	0.0697766
121	TTBK2_KAN488-12_6.tif:0002-0784	0.734	77.314	0	320	105.05	80.275	0.917	56.728	5412	1.264	0.791	0.903	0.515889
										5642.93				0.537902

## Sheet: RawData_3ed replicate
	Label	Area	Mean	Min	Max	X	Y	Circ	IntDen	RawIntDen	AR	Round	Solidity
1	TTBK2_KAN488-13_1.tif:0001-0082	0.776	223.419	0	794	141.787	8.368	0.868	173.297	16533	1.059	0.944	0.919	1.36455
2	TTBK2_KAN488-13_1.tif:0002-0127	1.31	96.104	0	662	38.957	13.012	0.899	125.919	12013	1.362	0.734	0.919	0.991495
3	TTBK2_KAN488-13_1.tif:0003-0125	0.786	123.107	0	430	62.96	12.868	0.946	96.779	9233	1.168	0.856	0.926	0.762047
4	TTBK2_KAN488-13_1.tif:0004-0178	1.038	193.051	0	707	108.382	18.282	0.94	200.329	19112	1.227	0.815	0.93	1.57741
5	TTBK2_KAN488-13_1.tif:0005-0229	1.069	154.912	0	849	33.884	23.473	0.909	165.624	15801	1.259	0.794	0.927	1.30414
6	TTBK2_KAN488-13_1.tif:0006-0478	0.776	78.473	0	241	62.093	48.956	0.9	60.868	5807	1.138	0.879	0.914	0.479282
7	TTBK2_KAN488-13_1.tif:0007-0511	1.342	133.938	0	966	128.338	52.273	0.885	179.701	17144	1.177	0.849	0.928	1.41498
8	TTBK2_KAN488-13_1.tif:0008-0567	0.65	37.274	0	218	0.841	58.162	0.782	24.224	2311	1.277	0.783	0.832	0.190739
9	TTBK2_KAN488-13_1.tif:0009-0634	1.363	156.315	0	720	82.388	64.842	0.842	213.002	20321	1.551	0.645	0.906	1.6772
10	TTBK2_KAN488-13_1.tif:0010-0647	0.975	132.548	0	579	116.156	66.249	0.924	129.21	12327	1.135	0.881	0.925	1.01741
11	TTBK2_KAN488-13_1.tif:0011-0681	0.996	96.347	0	548	22.758	69.728	0.81	95.94	9153	1.534	0.652	0.88	0.755445
12	TTBK2_KAN488-13_1.tif:0012-0773	1.426	164.228	0	1229	103.706	79.107	0.891	234.112	22335	1.32	0.757	0.932	1.84342
13	TTBK2_KAN488-13_1.tif:0013-0836	0.828	32.835	0	154	3.651	85.635	0.9	27.19	2594	1.306	0.766	0.888	0.214096
14	TTBK2_KAN488-13_1.tif:0014-0877	0.922	58.432	0	432	68.436	89.821	0.935	53.898	5142	1.154	0.867	0.926	0.424396
15	TTBK2_KAN488-13_1.tif:0015-0903	1.038	38.788	0	131	134.314	92.443	0.94	40.25	3840	1.252	0.799	0.921	0.316935
16	TTBK2_KAN488-13_1.tif:0016-0906	0.891	27.871	0	309	1.554	92.79	0.903	24.832	2369	1.246	0.802	0.904	0.195526
17	TTBK2_KAN488-13_1.tif:0017-0955	1.153	109.445	0	551	47.622	97.798	0.888	126.191	12039	1.43	0.699	0.88	0.993641
18	TTBK2_KAN488-13_2.tif:0001-0126	0.943	38.456	0	251	101.055	12.936	0.99	36.278	3461	1.115	0.897	0.933	0.285654
19	TTBK2_KAN488-13_2.tif:0002-0148	0.849	169.395	0	694	130.627	15.186	0.904	143.822	13721	1.405	0.712	0.926	1.13247
20	TTBK2_KAN488-13_2.tif:0003-0240	0.734	35.514	0	138	22.595	24.617	0.932	26.058	2486	1.084	0.923	0.933	0.205182
21	TTBK2_KAN488-13_2.tif:0004-0294	0.933	110.393	0	632	98.348	30.194	0.793	102.984	9825	1.139	0.878	0.873	0.810908
22	TTBK2_KAN488-13_2.tif:0005-0338	1.3	114.573	0	728	129.178	34.614	0.782	148.916	14207	1.541	0.649	0.858	1.17258
23	TTBK2_KAN488-13_2.tif:0006-0384	1.153	87.518	0	641	34.553	39.269	0.858	100.909	9627	1.201	0.832	0.924	0.794566
24	TTBK2_KAN488-13_2.tif:0007-0411	1.3	131.024	0	793	88.295	42.069	0.858	170.299	16247	1.49	0.671	0.905	1.34095
25	TTBK2_KAN488-13_2.tif:0008-0494	1.205	83.843	0	536	137.366	50.569	0.804	101.066	9642	1.5	0.667	0.888	0.795804
26	TTBK2_KAN488-13_2.tif:0009-0676	1.394	176.338	0	1253	79.834	69.235	0.862	245.831	23453	1.523	0.657	0.899	1.9357
27	TTBK2_KAN488-13_2.tif:0010-0677	1.08	89.854	0	332	7.283	69.361	0.89	97.01	9255	1.02	0.981	0.949	0.763863
28	TTBK2_KAN488-13_2.tif:0011-0737	1.059	194.158	0	1171	127.25	75.493	0.861	205.549	19610	1.353	0.739	0.902	1.61852
29	TTBK2_KAN488-13_2.tif:0012-0744	1.321	99.31	0	724	13.166	76.084	0.775	131.16	12513	1.536	0.651	0.9	1.03276
30	TTBK2_KAN488-13_2.tif:0013-0765	1.352	121.333	0	588	48.637	78.312	0.845	164.062	15652	1.455	0.687	0.908	1.29184
31	TTBK2_KAN488-13_2.tif:0014-0865	1.499	140.881	0	935	116.856	88.628	0.848	211.168	20146	1.136	0.88	0.885	1.66275
32	TTBK2_KAN488-13_2.tif:0015-0966	1.394	25.414	0	106	86.647	98.944	0.797	35.429	3380	1.67	0.599	0.893	0.278969
33	TTBK2_KAN488-13_2.tif:0016-0997	1.342	115.109	0	792	60.026	102.111	0.816	154.44	14734	1.605	0.623	0.905	1.21607
34	TTBK2_KAN488-13_2.tif:0017-1022	1.384	130.576	0	809	1.024	104.698	0.865	180.665	17236	1.474	0.678	0.913	1.42258
35	TTBK2_KAN488-13_3.tif:0001-0037	1.069	87.196	0	564	14.846	3.732	0.834	93.226	8894	1.473	0.679	0.887	0.734068
36	TTBK2_KAN488-13_3.tif:0002-0227	1.415	167.437	0	978	51.16	23.289	0.839	236.932	22604	1.406	0.711	0.915	1.86563
37	TTBK2_KAN488-13_3.tif:0003-0289	0.828	93.734	0	257	107.705	29.634	0.927	77.618	7405	1.346	0.743	0.946	0.611173
38	TTBK2_KAN488-13_3.tif:0004-0320	0.639	73.951	4	352	79.866	32.746	0.877	47.284	4511	1.53	0.654	0.884	0.372316
39	TTBK2_KAN488-13_3.tif:0005-0338	0.839	138.938	0	597	93.775	34.632	0.862	116.506	11115	1.226	0.815	0.925	0.917379
40	TTBK2_KAN488-13_3.tif:0006-0465	1.006	147.74	0	615	17.509	47.699	0.883	148.664	14183	1.135	0.881	0.906	1.1706
41	TTBK2_KAN488-13_3.tif:0007-0517	1.195	138.14	0	663	56.929	52.982	0.893	165.068	15748	1.441	0.694	0.908	1.29976
42	TTBK2_KAN488-13_3.tif:0008-0552	0.943	171.867	0	851	116.814	56.507	0.938	162.133	15468	1.018	0.982	0.952	1.27665
43	TTBK2_KAN488-13_3.tif:0009-0594	1.184	94.832	0	457	108.592	60.865	0.896	112.324	10716	1.21	0.827	0.915	0.884447
44	TTBK2_KAN488-13_3.tif:0010-0648	0.964	98.935	0	544	37.485	66.394	0.978	95.406	9102	1.1	0.909	0.939	0.751235
45	TTBK2_KAN488-13_3.tif:0011-0709	1.195	95.886	0	338	75.597	72.602	0.96	114.577	10931	1.154	0.867	0.927	0.902192
46	TTBK2_KAN488-13_3.tif:0012-0914	0.765	70.685	0	443	26.359	93.597	0.856	54.086	5160	1.288	0.777	0.924	0.425882
47	TTBK2_KAN488-13_3.tif:0013-0947	1.635	136.385	0	1067	94.939	97.018	0.68	223.012	21276	2.146	0.466	0.817	1.75602
48	TTBK2_KAN488-13_4.tif:0001-0067	0.723	75.913	0	395	86.293	6.88	0.924	54.904	5238	1.197	0.836	0.868	0.432319
49	TTBK2_KAN488-13_4.tif:0002-0118	0.88	98.417	0	477	8.85	12.091	0.875	86.654	8267	1.441	0.694	0.939	0.682318
50	TTBK2_KAN488-13_4.tif:0003-0183	1.226	179.889	0	895	37.408	18.81	0.876	220.612	21047	1.452	0.688	0.921	1.73712
51	TTBK2_KAN488-13_4.tif:0004-0222	0.912	78.471	0	342	119.582	22.714	1	71.56	6827	1.067	0.937	0.946	0.563468
52	TTBK2_KAN488-13_4.tif:0005-0293	0.975	137.14	0	574	71.861	30.041	0.912	133.686	12754	1.492	0.67	0.93	1.05265
53	TTBK2_KAN488-13_4.tif:0006-0372	0.681	99.8	0	442	0.651	38.069	0.914	67.996	6487	1.449	0.69	0.963	0.535406
54	TTBK2_KAN488-13_4.tif:0007-0501	0.901	130.058	0	630	41.517	51.307	0.827	117.24	11185	1.543	0.648	0.901	0.923156
55	TTBK2_KAN488-13_4.tif:0008-0519	0.954	177.505	0	893	101.398	53.128	0.935	169.313	16153	1.228	0.815	0.924	1.33319
56	TTBK2_KAN488-13_4.tif:0009-0601	1.027	155.969	0	641	87.375	61.565	0.961	160.215	15285	1.123	0.89	0.92	1.26155
57	TTBK2_KAN488-13_4.tif:0010-0692	0.975	122.161	0	439	10.158	70.798	0.924	119.084	11361	1.378	0.726	0.954	0.937682
58	TTBK2_KAN488-13_4.tif:0011-0724	0.86	93.585	0	416	59.793	74.196	0.902	80.438	7674	1.176	0.851	0.886	0.633375
59	TTBK2_KAN488-13_4.tif:0012-0750	0.933	73.213	0	440	13.288	76.784	0.993	68.3	6516	1.173	0.853	0.962	0.537799
60	TTBK2_KAN488-13_4.tif:0013-0753	1.268	106.661	0	784	105.837	77.081	0.823	135.279	12906	1.663	0.601	0.92	1.0652
61	TTBK2_KAN488-13_4.tif:0014-0927	0.828	65.013	0	190	17.902	94.903	0.852	53.835	5136	1.416	0.706	0.903	0.423901
62	TTBK2_KAN488-13_5.tif:0001-0089	1.321	219.341	0	1011	94.127	9.107	0.67	289.687	27637	1.87	0.535	0.81	2.28103
63	TTBK2_KAN488-13_5.tif:0002-0401	0.933	314.933	0	1433	128.789	41.044	0.915	293.796	28029	1.304	0.767	0.932	2.31338
64	TTBK2_KAN488-13_5.tif:0003-0545	1.363	155.746	0	864	73.43	55.772	0.909	212.226	20247	1.469	0.681	0.956	1.67109
65	TTBK2_KAN488-13_5.tif:0004-0636	0.975	116.14	0	656	10.304	65.132	0.883	113.215	10801	1.211	0.825	0.912	0.891463
66	TTBK2_KAN488-13_5.tif:0005-0664	0.975	139.645	0	870	42.997	68.04	0.818	136.128	12987	1.436	0.696	0.869	1.07188
67	TTBK2_KAN488-13_5.tif:0006-0675	1.174	171.562	0	941	130.245	69.082	0.873	201.409	19215	1.567	0.638	0.957	1.58591
68	TTBK2_KAN488-13_5.tif:0007-0712	1.163	217.18	0	1244	34.665	72.871	0.776	252.686	24107	1.871	0.534	0.906	1.98968
69	TTBK2_KAN488-13_5.tif:0008-0773	1.038	119.929	0	433	55.843	79.22	0.971	124.451	11873	1.06	0.944	0.93	0.97994
70	TTBK2_KAN488-13_5.tif:0009-0813	1.038	93.444	0	509	95.386	83.286	0.829	96.968	9251	1.621	0.617	0.921	0.763533
71	TTBK2_KAN488-13_5.tif:0010-0885	1.153	176.364	0	1168	124.571	90.645	0.8	203.348	19400	1.674	0.597	0.898	1.60118
72	TTBK2_KAN488-13_5.tif:0011-1032	1.163	270.55	0	1601	135.513	105.696	0.831	314.781	30031	1.655	0.604	0.933	2.47861
73	TTBK2_KAN488-13_6.tif:0001-0019	0.828	102.304	0	460	61.953	1.933	0.882	84.714	8082	1.118	0.895	0.903	0.667049
74	TTBK2_KAN488-13_6.tif:0002-0041	0.849	65.284	0	262	80.855	4.282	0.95	55.428	5288	1.185	0.844	0.959	0.436446
75	TTBK2_KAN488-13_6.tif:0003-0051	1.101	102.867	0	626	129.018	5.317	0.833	113.215	10801	1.374	0.728	0.894	0.891463
76	TTBK2_KAN488-13_6.tif:0004-0103	1.059	144.158	0	766	67.757	10.568	0.888	152.616	14560	1.21	0.827	0.906	1.20171
77	TTBK2_KAN488-13_6.tif:0005-0189	0.996	100.526	0	445	139.812	19.357	0.776	100.102	9550	1.832	0.546	0.852	0.788211
78	TTBK2_KAN488-13_6.tif:0006-0217	1.216	106.647	0	615	12.888	22.317	0.811	129.671	12371	1.865	0.536	0.924	1.02104
79	TTBK2_KAN488-13_6.tif:0007-0329	0.87	51.53	0	134	129.327	33.722	0.913	44.831	4277	1.208	0.828	0.897	0.353003
80	TTBK2_KAN488-13_6.tif:0008-0376	0.954	115.758	0	578	66.837	38.507	0.821	110.416	10534	1.759	0.568	0.933	0.869426
81	TTBK2_KAN488-13_6.tif:0009-0464	1.027	84.816	0	491	94.674	47.495	0.836	87.125	8312	1.36	0.735	0.871	0.686033
82	TTBK2_KAN488-13_6.tif:0010-0617	1.122	159.953	0	926	13.895	63.095	0.815	179.397	17115	1.613	0.62	0.895	1.41259
83	TTBK2_KAN488-13_6.tif:0011-0637	0.87	63.952	0	328	46.94	65.19	0.882	55.638	5308	1.375	0.727	0.883	0.438097
84	TTBK2_KAN488-13_6.tif:0012-0662	0.828	49.595	0	318	77.827	67.82	0.961	41.068	3918	1.087	0.92	0.94	0.323373
85	TTBK2_KAN488-13_6.tif:0013-0691	1.405	90.187	0	748	125.657	70.67	0.794	126.673	12085	1.353	0.739	0.862	0.997438
86	TTBK2_KAN488-13_6.tif:0014-0715	0.86	52.22	0	251	101.225	73.199	0.843	44.883	4282	1.462	0.684	0.891	0.353416
87	TTBK2_KAN488-13_6.tif:0015-0730	0.954	133.516	0	697	136.355	74.816	0.922	127.355	12150	1.171	0.854	0.901	1.0028
88	TTBK2_KAN488-13_6.tif:0016-0806	0.985	122.309	0	707	28.88	82.557	0.904	120.51	11497	1.275	0.784	0.94	0.948907
89	TTBK2_KAN488-13_6.tif:0017-0830	1.101	201.095	0	1247	58.081	85.015	0.935	221.324	21115	1.115	0.897	0.946	1.74273
90	TTBK2_KAN488-13_6.tif:0018-0865	1.279	127.82	0	727	97.412	88.577	0.94	163.454	15594	1.165	0.859	0.938	1.28705
91	TTBK2_KAN488-13_6.tif:0019-0867	0.975	40.452	0	210	118.829	88.773	0.956	39.433	3762	1.043	0.959	0.939	0.310497
92	TTBK2_KAN488-13_6.tif:0020-1005	0.786	43.72	0	379	35.681	102.892	0.88	34.37	3279	1.243	0.805	0.92	0.270633
										12116				1
93	TTBK2_KAN488-14_1.tif:0001-0007	0.66	46.381	0	266	128.453	0.682	0.886	30.628	2922	1.095	0.914	0.947	0.241168
94	TTBK2_KAN488-14_1.tif:0002-0097	0.891	214.047	0	942	97.308	9.936	0.983	190.707	18194	1.015	0.985	0.95	1.50165
95	TTBK2_KAN488-14_1.tif:0003-0207	0.765	94.123	0	366	78.554	21.195	0.956	72.021	6871	1.44	0.694	0.924	0.567099
96	TTBK2_KAN488-14_1.tif:0004-0318	0.765	64.479	0	293	6.583	32.596	0.888	49.338	4707	1.238	0.808	0.918	0.388493
97	TTBK2_KAN488-14_1.tif:0005-0378	0.828	28.595	0	100	124.61	38.759	0.947	23.679	2259	1.258	0.795	0.924	0.186447
98	TTBK2_KAN488-14_1.tif:0006-0511	1.09	115.183	0	552	77.237	52.323	0.939	125.562	11979	1.091	0.917	0.972	0.988689
99	TTBK2_KAN488-14_1.tif:0007-0590	1.31	142.904	0	960	76.258	60.425	0.819	187.237	17863	1.507	0.663	0.88	1.47433
100	TTBK2_KAN488-14_1.tif:0008-0654	1.268	97.281	0	543	30.78	67.002	0.784	123.382	11771	1.792	0.558	0.883	0.971522
101	TTBK2_KAN488-14_1.tif:0009-0725	1.394	74.346	0	494	97.632	74.207	0.818	103.645	9888	1.341	0.746	0.908	0.816108
102	TTBK2_KAN488-14_1.tif:0010-0791	0.901	104.535	0	679	30.26	81.02	0.816	94.232	8990	1.385	0.722	0.864	0.741991
103	TTBK2_KAN488-14_1.tif:0011-0839	0.681	76.062	0	359	132.636	85.935	0.935	51.822	4944	1.382	0.724	0.922	0.408054
104	TTBK2_KAN488-14_2.tif:0001-0074	1.122	141.579	0	727	63.185	7.637	0.815	158.79	15149	1.659	0.603	0.866	1.25033
105	TTBK2_KAN488-14_2.tif:0002-0124	0.891	61.859	0	363	102.457	12.738	0.792	55.114	5258	1.699	0.589	0.899	0.43397
106	TTBK2_KAN488-14_2.tif:0003-0174	1.038	73.323	0	452	54.996	17.839	0.971	76.088	7259	1.073	0.932	0.934	0.599123
107	TTBK2_KAN488-14_2.tif:0004-0238	0.723	100.899	0	403	6.095	24.396	0.871	72.975	6962	1.396	0.716	0.896	0.57461
108	TTBK2_KAN488-14_2.tif:0005-0238	0.818	74.692	0	328	19.603	24.466	0.935	61.067	5826	1.246	0.802	0.912	0.48085
109	TTBK2_KAN488-14_2.tif:0006-0273	0.86	116.646	0	447	124.614	27.994	0.915	100.259	9565	1.049	0.954	0.921	0.789449
110	TTBK2_KAN488-14_2.tif:0007-0383	0.839	91.1	0	406	44.902	39.243	0.88	76.392	7288	1.477	0.677	0.894	0.601516
111	TTBK2_KAN488-14_2.tif:0008-0384	0.839	160.55	0	705	139.689	39.355	0.973	134.629	12844	1.08	0.926	0.952	1.06008
112	TTBK2_KAN488-14_2.tif:0009-0401	0.807	62.104	0	234	50.447	41.082	0.859	50.124	4782	1.613	0.62	0.911	0.394683
113	TTBK2_KAN488-14_2.tif:0010-0410	0.975	112.978	0	349	106.613	41.971	0.924	110.133	10507	1.361	0.735	0.935	0.867197
114	TTBK2_KAN488-14_2.tif:0011-0525	0.891	113.788	0	512	56.398	53.8	0.903	101.381	9672	1.432	0.698	0.909	0.79828
115	TTBK2_KAN488-14_2.tif:0012-0557	1.226	124.538	0	849	120.225	57.038	0.901	152.731	14571	1.112	0.899	0.929	1.20262
116	TTBK2_KAN488-14_2.tif:0013-0573	0.692	34.561	0	93	12.745	58.712	0.913	23.909	2281	1.084	0.923	0.904	0.188263
117	TTBK2_KAN488-14_2.tif:0014-0637	0.702	33.448	0	197	48.092	65.222	0.912	23.49	2241	1.572	0.636	0.893	0.184961
118	TTBK2_KAN488-14_2.tif:0015-0758	0.891	50.824	0	288	82.443	77.685	0.781	45.282	4320	1.403	0.713	0.863	0.356552
119	TTBK2_KAN488-14_2.tif:0016-0818	1.059	49.921	0	477	118.279	83.718	0.888	52.85	5042	1.219	0.821	0.894	0.416142
120	TTBK2_KAN488-14_2.tif:0017-0888	1.163	117.937	0	734	62.813	90.987	0.808	137.218	13091	1.577	0.634	0.91	1.08047
121	TTBK2_KAN488-14_2.tif:0018-0954	1.205	201.609	0	899	108.721	97.707	0.901	243.022	23185	1.111	0.9	0.902	1.91358
122	TTBK2_KAN488-14_3.tif:0001-0025	0.891	154.788	0	610	1.298	2.6	0.916	137.91	13157	1.274	0.785	0.934	1.08592
123	TTBK2_KAN488-14_3.tif:0002-0082	1.205	116.078	0	687	38.341	8.348	0.871	139.922	13349	1.361	0.735	0.947	1.10176
124	TTBK2_KAN488-14_3.tif:0003-0087	0.66	41.032	0	144	18.535	8.888	0.906	27.096	2585	1.242	0.805	0.9	0.213353
125	TTBK2_KAN488-14_3.tif:0004-0108	0.891	58.129	0	321	118.62	11.059	0.935	51.791	4941	1.109	0.901	0.914	0.407806
126	TTBK2_KAN488-14_3.tif:0005-0158	0.975	37.204	0	272	60.93	16.205	0.956	36.267	3460	1.112	0.899	0.939	0.285572
127	TTBK2_KAN488-14_3.tif:0006-0345	0.891	68.165	0	324	64.392	35.356	0.903	60.732	5794	1.089	0.918	0.904	0.478209
128	TTBK2_KAN488-14_3.tif:0007-0506	1.143	9.009	0	47	116.86	51.861	0.946	10.293	982	1.188	0.842	0.912	0.0810496
129	TTBK2_KAN488-14_3.tif:0008-0507	1.352	112.961	0	845	129.023	51.965	0.892	152.742	14572	1.226	0.816	0.902	1.2027
130	TTBK2_KAN488-14_3.tif:0009-0535	1.059	39.772	0	409	74.191	54.763	0.861	42.106	4017	1.447	0.691	0.914	0.331544
131	TTBK2_KAN488-14_3.tif:0010-0557	0.954	64.747	0	244	105.361	57.097	0.967	61.759	5892	1.127	0.887	0.933	0.486297
132	TTBK2_KAN488-14_3.tif:0011-0612	0.86	72.061	0	321	126.042	62.692	0.962	61.937	5909	1.113	0.899	0.959	0.4877
133	TTBK2_KAN488-14_3.tif:0012-0693	1.111	120.123	0	683	35.571	70.952	0.866	133.466	12733	1.078	0.928	0.902	1.05092
134	TTBK2_KAN488-14_3.tif:0013-0737	1.31	122.568	0	956	87.214	75.451	0.864	160.593	15321	1.489	0.672	0.893	1.26452
135	TTBK2_KAN488-14_3.tif:0014-0754	1.153	79.036	0	498	137.681	77.231	0.828	91.129	8694	1.556	0.643	0.866	0.717561
136	TTBK2_KAN488-14_3.tif:0015-0935	0.839	60.35	0	163	7.049	95.818	0.88	50.606	4828	1.53	0.654	0.889	0.39848
137	TTBK2_KAN488-14_3.tif:0016-0981	1.111	61.264	0	219	93.348	100.501	0.932	68.069	6494	1.218	0.821	0.918	0.535984
138	TTBK2_KAN488-14_4.tif:0001-0026	0.692	62.591	0	265	95.162	2.691	0.949	43.301	4131	1.079	0.927	0.91	0.340953
139	TTBK2_KAN488-14_4.tif:0002-0075	1.195	122.825	0	576	77.047	7.763	0.747	146.767	14002	1.557	0.642	0.851	1.15566
140	TTBK2_KAN488-14_4.tif:0003-0100	0.828	66.304	0	339	24.178	10.228	0.982	54.904	5238	1.208	0.827	0.913	0.432319
141	TTBK2_KAN488-14_4.tif:0004-0225	0.954	109	0	545	95.98	22.994	0.826	103.97	9919	1.635	0.612	0.875	0.818667
142	TTBK2_KAN488-14_4.tif:0005-0257	0.66	39.254	0	101	14.664	26.331	0.943	25.922	2473	1.391	0.719	0.906	0.20411
143	TTBK2_KAN488-14_4.tif:0006-0280	0.681	43.138	0	240	130.768	28.652	0.885	29.391	2804	1.164	0.859	0.872	0.231429
144	TTBK2_KAN488-14_4.tif:0007-0325	1.006	44.604	0	172	123.855	33.308	0.941	44.883	4282	1.204	0.83	0.937	0.353416
145	TTBK2_KAN488-14_4.tif:0008-0577	0.922	69.636	0	366	2.613	59.106	0.904	64.233	6128	1.271	0.787	0.926	0.505776
146	TTBK2_KAN488-14_4.tif:0009-0735	1.101	101.819	0	493	58.282	75.29	0.924	112.062	10691	1.253	0.798	0.921	0.882384
147	TTBK2_KAN488-14_4.tif:0010-0829	1.038	66.707	0	372	104.133	84.838	0.94	69.222	6604	1.191	0.84	0.934	0.545062
148	TTBK2_KAN488-14_4.tif:0011-0869	0.839	94.912	0	448	5.754	88.996	0.906	79.589	7593	1.175	0.851	0.947	0.62669
149	TTBK2_KAN488-14_4.tif:0012-0871	1.478	179.936	0	1626	116.79	89.242	0.815	265.935	25371	1.483	0.674	0.873	2.094
150	TTBK2_KAN488-14_4.tif:0013-0920	1.069	149.676	0	856	77.999	94.194	0.87	160.027	15267	1.417	0.706	0.903	1.26006
151	TTBK2_KAN488-14_4.tif:0014-0973	1.342	119.734	0	748	86.591	99.632	0.91	160.645	15326	1.339	0.747	0.908	1.26493
152	TTBK2_KAN488-14_5.tif:0001-0065	0.964	75.076	0	363	102.552	6.666	0.964	72.398	6907	1.267	0.789	0.92	0.570071
153	TTBK2_KAN488-14_5.tif:0002-0171	1.143	113.303	0	601	105.788	17.504	0.865	129.451	12350	1.485	0.673	0.916	1.01931
154	TTBK2_KAN488-14_5.tif:0003-0241	1.321	107.238	0	792	18.956	24.683	0.896	141.631	13512	1.243	0.805	0.906	1.11522
155	TTBK2_KAN488-14_5.tif:0004-0239	0.692	110.727	0	398	10.219	24.519	0.949	76.601	7308	1.179	0.848	0.91	0.603167
156	TTBK2_KAN488-14_5.tif:0005-0245	0.797	163.342	0	522	42.631	25.078	0.924	130.122	12414	1.246	0.803	0.933	1.02459
157	TTBK2_KAN488-14_5.tif:0006-0387	1.237	85.576	0	414	111.875	39.666	0.859	105.846	10098	1.235	0.809	0.915	0.83344
158	TTBK2_KAN488-14_5.tif:0007-0401	0.985	70.543	0	384	81.377	41.078	0.922	69.505	6631	1.099	0.91	0.913	0.547291
159	TTBK2_KAN488-14_5.tif:0008-0507	0.755	122.028	0	393	123.622	51.984	1	92.094	8786	1.029	0.972	0.954	0.725154
160	TTBK2_KAN488-14_5.tif:0009-0586	1.216	99.207	0	574	46.433	60.11	0.868	120.625	11508	1.293	0.773	0.932	0.949815
161	TTBK2_KAN488-14_5.tif:0010-0591	0.901	73.93	0	282	109.892	60.532	0.816	66.644	6358	1.836	0.545	0.901	0.524759
162	TTBK2_KAN488-14_5.tif:0011-0643	1.321	170.675	0	1107	125.214	65.811	0.862	225.412	21505	1.374	0.728	0.887	1.77492
163	TTBK2_KAN488-14_5.tif:0012-0678	1.069	84.706	0	646	24.414	69.491	0.819	90.563	8640	1.589	0.629	0.903	0.713104
164	TTBK2_KAN488-14_5.tif:0013-0724	0.776	38.054	0	268	3.803	74.135	0.934	29.517	2816	1.266	0.79	0.914	0.232419
165	TTBK2_KAN488-14_5.tif:0014-0764	0.901	111.744	0	485	61.904	78.19	0.884	100.731	9610	1.249	0.801	0.915	0.793163
166	TTBK2_KAN488-14_5.tif:0015-1011	1.31	136.448	0	779	95.289	103.512	0.879	178.779	17056	1.284	0.779	0.893	1.40772
167	TTBK2_KAN488-14_6.tif:0001-0085	0.87	91.446	0	236	100.517	8.697	0.895	79.557	7590	1.514	0.66	0.938	0.626442
168	TTBK2_KAN488-14_6.tif:0002-0206	1.153	91.891	0	554	108.167	21.14	0.814	105.951	10108	1.745	0.573	0.876	0.834266
169	TTBK2_KAN488-14_6.tif:0003-0318	1.226	135.436	0	715	131.787	32.581	0.809	166.096	15846	1.389	0.72	0.886	1.30785
170	TTBK2_KAN488-14_6.tif:0004-0343	0.786	102.493	0	374	45.059	35.179	0.946	80.574	7687	1.218	0.821	0.926	0.634448
171	TTBK2_KAN488-14_6.tif:0005-0362	0.818	65.346	0	339	32.14	37.113	0.915	53.426	5097	1.106	0.904	0.934	0.420682
172	TTBK2_KAN488-14_6.tif:0006-0518	1.017	144.619	0	770	106.735	53.019	0.921	147.04	14028	1.235	0.81	0.937	1.1578
173	TTBK2_KAN488-14_6.tif:0007-0525	1.268	122.967	0	609	71.999	53.712	0.895	155.96	14879	1.449	0.69	0.913	1.22804
174	TTBK2_KAN488-14_6.tif:0008-0607	1.038	79.525	0	648	64.941	62.105	0.94	82.524	7873	1.231	0.813	0.943	0.6498
175	TTBK2_KAN488-14_6.tif:0009-0784	0.744	145.127	0	653	34.52	80.249	0.792	108.005	10304	1.654	0.605	0.861	0.850443
176	TTBK2_KAN488-14_6.tif:0010-0785	0.954	59.692	0	387	126.707	80.394	0.892	56.937	5432	1.036	0.965	0.892	0.448331
177	TTBK2_KAN488-14_6.tif:0011-0909	1.027	103.102	0	552	13.689	93.095	0.873	105.909	10104	1.381	0.724	0.92	0.833936
178	TTBK2_KAN488-14_6.tif:0012-0979	1.017	140.732	0	686	82.123	100.255	0.933	143.088	13651	1.142	0.876	0.951	1.12669
										9196.35				0.759022
179	TTBK2_KAN488-15_1.tif:0001-0010	1.006	125.042	0	555	46.007	1.041	0.973	125.824	12004	1.038	0.963	0.919	0.990752
180	TTBK2_KAN488-15_1.tif:0002-0066	0.88	113.143	0	326	4.117	6.745	0.937	99.62	9504	1.022	0.979	0.933	0.784414
181	TTBK2_KAN488-15_1.tif:0003-0249	0.66	135.714	1	479	85.569	25.516	0.943	89.62	8550	1.416	0.706	0.913	0.705676
182	TTBK2_KAN488-15_1.tif:0004-0259	0.692	58.682	0	336	78.295	26.59	0.934	40.596	3873	1.188	0.842	0.88	0.319659
183	TTBK2_KAN488-15_1.tif:0005-0376	0.818	111.59	0	453	23.045	38.573	0.949	91.234	8704	1.16	0.862	0.945	0.718386
184	TTBK2_KAN488-15_1.tif:0006-0380	1.048	98.46	0	532	52.419	38.929	0.817	103.204	9846	1.634	0.612	0.87	0.812642
185	TTBK2_KAN488-15_1.tif:0007-0409	0.901	187.256	0	928	96.785	41.936	0.896	168.8	16104	1.277	0.783	0.935	1.32915
186	TTBK2_KAN488-15_1.tif:0008-0589	1.027	162.969	0	942	92.471	60.341	0.901	167.406	15971	1.031	0.97	0.92	1.31817
187	TTBK2_KAN488-15_1.tif:0009-0665	0.891	131.459	0	532	40.613	68.113	0.983	117.124	11174	1.19	0.84	0.95	0.922248
188	TTBK2_KAN488-15_1.tif:0010-0769	0.744	64.085	0	372	117.383	78.81	0.945	47.692	4550	1.114	0.898	0.94	0.375535
189	TTBK2_KAN488-15_1.tif:0011-0776	0.818	71.269	0	578	60.376	79.47	0.984	58.269	5559	1.164	0.859	0.945	0.458813
190	TTBK2_KAN488-15_1.tif:0012-0849	0.954	137.648	0	603	97.444	87.046	0.753	131.296	12526	2.001	0.5	0.892	1.03384
191	TTBK2_KAN488-15_1.tif:0013-0909	0.922	142.159	0	622	29.875	93.131	0.887	131.128	12510	1.298	0.77	0.946	1.03252
192	TTBK2_KAN488-15_1.tif:0014-0936	0.818	161.385	0	476	111.971	95.805	0.915	131.946	12588	1.166	0.858	0.94	1.03895
193	TTBK2_KAN488-15_1.tif:0015-0945	0.849	68.802	0	304	54.111	96.768	0.873	58.415	5573	1.316	0.76	0.915	0.459969
194	TTBK2_KAN488-15_2.tif:0001-0107	1.195	192.421	0	1215	101.575	10.99	0.788	229.93	21936	1.484	0.674	0.86	1.81049
195	TTBK2_KAN488-15_2.tif:0002-0166	0.933	74.674	0	332	46.383	17.037	0.933	69.662	6646	1.232	0.812	0.913	0.548529
196	TTBK2_KAN488-15_2.tif:0003-0220	1.143	106.138	0	547	136.995	22.545	0.891	121.265	11569	1.246	0.803	0.905	0.95485
197	TTBK2_KAN488-15_2.tif:0004-0230	1.006	195.656	0	755	59.949	23.517	0.954	196.881	18783	1.199	0.834	0.955	1.55026
198	TTBK2_KAN488-15_2.tif:0005-0442	0.901	111.744	0	537	86.915	45.314	1	100.731	9610	1.066	0.938	0.925	0.793163
199	TTBK2_KAN488-15_2.tif:0006-0515	0.818	161.526	0	601	39.564	52.794	0.841	132.061	12599	1.464	0.683	0.891	1.03986
200	TTBK2_KAN488-15_2.tif:0007-0637	0.744	83.831	0	407	11.714	65.262	0.982	62.388	5952	1.059	0.944	0.94	0.491249
201	TTBK2_KAN488-15_2.tif:0008-0671	0.964	50.88	0	145	129.137	68.707	0.978	49.066	4681	1.094	0.914	0.929	0.386347
202	TTBK2_KAN488-15_2.tif:0009-0682	1.006	80.938	0	393	62.576	69.89	0.883	81.444	7770	1.199	0.834	0.914	0.641298
203	TTBK2_KAN488-15_2.tif:0010-0758	1.122	144.776	0	820	103.991	77.549	0.913	162.374	15491	1.124	0.89	0.926	1.27855
204	TTBK2_KAN488-15_2.tif:0011-0893	0.765	57.603	0	240	30.958	91.463	0.936	44.076	4205	1.044	0.958	0.948	0.34706
205	TTBK2_KAN488-15_2.tif:0012-0963	0.87	56.651	0	250	117.62	98.621	0.946	49.286	4702	1.251	0.799	0.912	0.38808
206	TTBK2_KAN488-15_2.tif:0013-0969	0.933	123.382	0	500	39.719	99.281	0.915	115.101	10981	1.177	0.85	0.918	0.906319
207	TTBK2_KAN488-15_3.tif:0001-0117	1.3	165.5	0	692	51.053	12.016	0.791	215.109	20522	1.806	0.554	0.902	1.69379
208	TTBK2_KAN488-15_3.tif:0002-0175	0.744	81.761	0	619	0.641	17.874	0.864	60.847	5805	1.75	0.571	0.953	0.479117
209	TTBK2_KAN488-15_3.tif:0003-0205	0.87	56.434	0	128	100.451	21.004	1	49.097	4684	1.026	0.975	0.938	0.386595
210	TTBK2_KAN488-15_3.tif:0004-0335	0.88	42.321	0	221	119.132	34.305	0.924	37.263	3555	1.4	0.714	0.918	0.293413
211	TTBK2_KAN488-15_3.tif:0005-0412	0.964	80.478	0	492	115.112	42.183	0.873	77.608	7404	1.092	0.916	0.893	0.611091
212	TTBK2_KAN488-15_3.tif:0006-0512	1.038	177.374	0	589	80.485	52.492	0.927	184.061	17560	1.249	0.801	0.904	1.44932
213	TTBK2_KAN488-15_3.tif:0007-0631	0.891	148.259	0	735	106.688	64.667	0.873	132.092	12602	1.519	0.658	0.899	1.04011
214	TTBK2_KAN488-15_3.tif:0008-0659	1.226	180.897	0	1163	37.425	67.497	0.809	221.849	21165	1.587	0.63	0.873	1.74686
215	TTBK2_KAN488-15_3.tif:0009-0796	0.985	90.809	0	500	88.066	81.5	0.922	89.473	8536	1.324	0.755	0.922	0.70452
216	TTBK2_KAN488-15_3.tif:0010-0838	1.09	125.308	0	566	138.026	85.772	0.927	136.6	13032	1.267	0.789	0.954	1.0756
217	TTBK2_KAN488-15_3.tif:0011-0985	1.09	150.308	0	570	68.815	100.866	0.944	163.852	15632	1.353	0.739	0.924	1.29019
218	TTBK2_KAN488-15_4.tif:0001-0031	1.006	156.948	0	497	111.01	3.151	0.954	157.93	15067	1.244	0.804	0.95	1.24356
219	TTBK2_KAN488-15_4.tif:0002-0201	1.195	91.596	0	326	35.092	20.573	0.932	109.452	10442	1.182	0.846	0.916	0.861832
220	TTBK2_KAN488-15_4.tif:0003-0247	1.038	162.111	0	898	63.378	25.333	0.91	168.223	16049	1.043	0.959	0.917	1.32461
221	TTBK2_KAN488-15_4.tif:0004-0274	1.153	118.927	0	702	7.518	28.073	0.749	137.124	13082	2.073	0.482	0.887	1.07973
222	TTBK2_KAN488-15_4.tif:0005-0347	0.734	101.029	0	430	87.83	35.501	0.917	74.128	7072	1.244	0.804	0.903	0.583689
223	TTBK2_KAN488-15_4.tif:0006-0638	1.09	158.567	0	645	133.771	65.299	0.887	172.856	16491	1.178	0.849	0.908	1.36109
224	TTBK2_KAN488-15_4.tif:0007-0710	1.174	97.839	0	648	37.863	72.729	0.904	114.86	10958	1.289	0.776	0.907	0.904421
225	TTBK2_KAN488-15_4.tif:0008-0743	0.744	76.761	0	376	1.611	76.087	0.93	57.126	5450	1.206	0.829	0.899	0.449817
226	TTBK2_KAN488-15_4.tif:0009-0776	1.017	149.216	0	714	90.379	79.437	0.892	151.714	14474	1.225	0.817	0.915	1.19461
227	TTBK2_KAN488-15_4.tif:0010-0778	1.226	88.043	0	497	114.191	79.715	0.8	107.974	10301	1.076	0.93	0.845	0.850195
228	TTBK2_KAN488-15_4.tif:0011-0869	1.069	85.333	0	391	52.847	88.982	0.897	91.234	8704	1.364	0.733	0.923	0.718386
229	TTBK2_KAN488-15_4.tif:0012-0898	1.006	166.396	0	1001	110.978	91.952	0.883	167.437	15974	1.472	0.679	0.919	1.31842
230	TTBK2_KAN488-15_4.tif:0013-0979	0.891	74.506	0	246	48.617	100.206	0.983	66.382	6333	1.146	0.873	0.944	0.522695
231	TTBK2_KAN488-15_4.tif:0014-1004	0.702	16.776	0	43	9.024	102.805	0.892	11.782	1124	1.409	0.71	0.918	0.0927696
232	TTBK2_KAN488-15_4.tif:0015-1031	0.629	62.933	0	238	87.831	105.611	0.952	39.58	3776	1.223	0.818	0.923	0.311653
233	TTBK2_KAN488-15_5.tif:0001-0094	0.828	49.329	0	373	133.119	9.679	0.882	40.848	3897	1.322	0.757	0.919	0.32164
234	TTBK2_KAN488-15_5.tif:0002-0115	1.205	107.4	0	715	63.802	11.754	0.876	129.461	12351	1.338	0.747	0.891	1.01939
235	TTBK2_KAN488-15_5.tif:0003-0154	1.384	133.182	0	765	111.446	15.789	0.903	184.271	17580	1.259	0.794	0.907	1.45097
236	TTBK2_KAN488-15_5.tif:0004-0230	0.964	106.533	0	627	15.416	23.503	0.846	102.733	9801	1.278	0.782	0.893	0.808927
237	TTBK2_KAN488-15_5.tif:0005-0257	0.713	128.279	0	546	78.901	26.357	0.699	91.433	8723	2.305	0.434	0.85	0.719954
238	TTBK2_KAN488-15_5.tif:0006-0326	0.964	115.185	0	462	87.851	33.433	0.932	111.076	10597	1.095	0.913	0.911	0.874625
239	TTBK2_KAN488-15_5.tif:0007-0447	1.017	26.99	0	314	135.72	45.809	0.892	27.442	2618	1.415	0.707	0.919	0.216077
240	TTBK2_KAN488-15_5.tif:0008-0497	0.985	125.606	0	655	81.047	50.886	0.892	123.759	11807	1.361	0.735	0.917	0.974493
241	TTBK2_KAN488-15_5.tif:0009-0523	0.839	105.375	0	273	25.904	53.586	0.973	88.362	8430	1.168	0.856	0.952	0.695772
242	TTBK2_KAN488-15_5.tif:0010-0591	1.038	84.101	0	253	108.15	60.44	0.871	87.272	8326	1.346	0.743	0.9	0.687188
243	TTBK2_KAN488-15_5.tif:0011-0765	1.195	129.439	0	646	42.505	78.38	0.889	154.67	14756	1.331	0.751	0.954	1.21789
244	TTBK2_KAN488-15_5.tif:0012-0791	0.765	68.808	0	321	6.371	81.019	0.875	52.65	5023	1.304	0.767	0.874	0.414574
245	TTBK2_KAN488-15_5.tif:0013-0792	0.88	23.964	0	190	119.561	81.12	0.951	21.1	2013	1.115	0.896	0.966	0.166143
246	TTBK2_KAN488-15_5.tif:0014-0810	1.143	236.716	0	1336	91.361	82.941	0.902	270.453	25802	1.293	0.773	0.94	2.12957
247	TTBK2_KAN488-15_5.tif:0015-0861	1.143	183.743	0	1086	118.778	88.119	0.865	209.931	20028	1.211	0.826	0.908	1.65301
248	TTBK2_KAN488-15_6.tif:0001-0081	0.797	93.224	0	413	114.801	8.322	0.892	74.264	7085	1.196	0.836	0.927	0.584762
249	TTBK2_KAN488-15_6.tif:0002-0126	1.352	170.791	0	957	58.821	12.93	0.868	230.936	22032	1.36	0.735	0.899	1.81842
250	TTBK2_KAN488-15_6.tif:0003-0288	1.048	175.81	0	951	14.719	29.545	0.949	184.282	17581	1.248	0.801	0.943	1.45105
251	TTBK2_KAN488-15_6.tif:0004-0397	0.912	71.299	0	590	10.127	40.647	0.971	65.019	6203	1.105	0.905	0.946	0.511966
252	TTBK2_KAN488-15_6.tif:0005-0508	0.66	72.444	0	152	47.38	52.054	1	47.839	4564	1.105	0.905	0.947	0.376691
253	TTBK2_KAN488-15_6.tif:0006-0566	0.985	131.883	0	500	59.884	57.994	0.904	129.944	12397	1.387	0.721	0.945	1.02319
254	TTBK2_KAN488-15_6.tif:0007-0621	1.174	77.536	0	378	36.476	63.663	0.899	91.024	8684	1.043	0.958	0.945	0.716736
255	TTBK2_KAN488-15_6.tif:0008-0673	1.122	112.888	0	410	73.107	68.95	0.971	126.61	12079	1.138	0.879	0.926	0.996943
256	TTBK2_KAN488-15_6.tif:0009-0861	0.985	131.713	0	561	108.698	88.175	0.922	129.776	12381	1.283	0.779	0.913	1.02187
										10698.9				0.883035
257	TTBK2_KAN488-16_1.tif:0001-0163	1.195	78.439	0	399	89.807	16.722	0.834	93.729	8942	1.662	0.602	0.884	0.73803
258	TTBK2_KAN488-16_1.tif:0002-0241	0.933	190.315	0	632	139.952	24.712	0.885	177.542	16938	1.175	0.851	0.908	1.39798
259	TTBK2_KAN488-16_1.tif:0003-0270	1.237	125.864	0	765	30.354	27.74	0.773	155.677	14852	1.752	0.571	0.897	1.22581
260	TTBK2_KAN488-16_1.tif:0004-0272	0.839	103.35	0	622	86.806	27.927	0.939	86.664	8268	1.13	0.885	0.947	0.682401
261	TTBK2_KAN488-16_1.tif:0005-0396	0.87	169.193	0	619	124.553	40.622	0.895	147.197	14043	1.246	0.802	0.927	1.15904
262	TTBK2_KAN488-16_1.tif:0006-0405	0.818	102.513	0	442	75.686	41.523	0.935	83.813	7996	1.233	0.811	0.918	0.659951
263	TTBK2_KAN488-16_1.tif:0007-0694	1.279	157.254	0	915	125.812	71.103	0.903	201.094	19185	1.255	0.797	0.924	1.58344
264	TTBK2_KAN488-16_1.tif:0008-0730	0.985	164.894	0	718	38.829	74.774	0.837	162.469	15500	1.69	0.592	0.931	1.2793
265	TTBK2_KAN488-16_1.tif:0009-0767	0.776	85.378	0	241	84.183	78.606	0.855	66.224	6318	1.429	0.7	0.892	0.521457
266	TTBK2_KAN488-16_1.tif:0010-0945	1.195	85.684	0	577	66.412	96.72	0.868	102.387	9768	1.611	0.621	0.923	0.806204
267	TTBK2_KAN488-16_2.tif:0001-0101	1.268	155.14	0	928	45.046	10.322	0.793	196.765	18772	1.734	0.577	0.896	1.54935
268	TTBK2_KAN488-16_2.tif:0002-0159	1.006	149.479	0	447	95.599	16.332	0.883	150.415	14350	1.328	0.753	0.914	1.18438
269	TTBK2_KAN488-16_2.tif:0003-0230	1.279	126.828	0	904	131.459	23.562	0.808	162.186	15473	1.857	0.538	0.935	1.27707
270	TTBK2_KAN488-16_2.tif:0004-0369	1.027	86.378	0	572	69.363	37.759	0.801	88.729	8465	1.762	0.568	0.875	0.69866
271	TTBK2_KAN488-16_2.tif:0005-0424	0.713	144.044	0	462	23.514	43.456	0.978	102.67	9795	1.092	0.916	0.932	0.808432
272	TTBK2_KAN488-16_2.tif:0006-0485	0.891	96.388	0	529	50.22	49.718	0.983	85.878	8193	1.198	0.835	0.939	0.676211
273	TTBK2_KAN488-16_2.tif:0007-0561	1.426	98.515	0	657	132.348	57.452	0.836	140.436	13398	1.53	0.654	0.901	1.10581
274	TTBK2_KAN488-16_2.tif:0008-0708	1.153	101.345	0	636	85.98	72.533	0.873	116.852	11148	1.045	0.957	0.924	0.920102
275	TTBK2_KAN488-16_2.tif:0009-0737	0.723	78.812	0	283	25.902	75.469	0.954	57	5438	1.231	0.813	0.939	0.448826
276	TTBK2_KAN488-16_2.tif:0010-0819	1.614	75.623	0	510	111.977	83.797	0.81	122.072	11646	1.374	0.728	0.873	0.961205
277	TTBK2_KAN488-16_2.tif:0011-0941	1.279	147.516	0	966	94.483	96.434	0.903	188.642	17997	1.372	0.729	0.91	1.48539
278	TTBK2_KAN488-16_3.tif:0001-0022	1.048	131.58	0	694	65.915	2.338	0.817	137.92	13158	1.26	0.794	0.855	1.086
279	TTBK2_KAN488-16_3.tif:0002-0078	1.017	108.155	0	565	134.375	7.948	0.921	109.965	10491	1.354	0.738	0.928	0.865877
280	TTBK2_KAN488-16_3.tif:0003-0129	0.922	66.375	0	276	107.821	13.263	0.968	61.225	5841	1.111	0.9	0.917	0.482088
281	TTBK2_KAN488-16_3.tif:0004-0248	1.048	39.33	0	294	119.498	25.44	0.967	41.225	3933	1.09	0.917	0.909	0.324611
282	TTBK2_KAN488-16_3.tif:0005-0451	0.954	54.67	0	191	8.111	46.171	0.981	52.147	4975	1.023	0.978	0.963	0.410613
283	TTBK2_KAN488-16_3.tif:0006-0641	1.122	130.991	0	714	101.096	65.698	0.874	146.914	14016	1.246	0.803	0.892	1.15681
284	TTBK2_KAN488-16_3.tif:0007-0782	0.943	134.5	0	608	128.898	80.048	0.938	126.883	12105	1.053	0.949	0.952	0.999089
285	TTBK2_KAN488-16_3.tif:0008-0855	0.807	24.442	0	76	37.633	87.619	0.923	19.727	1882	1.215	0.823	0.906	0.155331
286	TTBK2_KAN488-16_3.tif:0009-0939	0.87	101.434	0	493	93.669	96.165	0.882	88.247	8419	1.382	0.723	0.902	0.694864
287	TTBK2_KAN488-16_3.tif:0010-1004	1.059	133.584	0	689	17.112	102.806	0.9	141.421	13492	1.517	0.659	0.944	1.11356
288	TTBK2_KAN488-16_3.tif:0011-1020	0.912	24.057	0	112	76.603	104.446	0.925	21.939	2093	1.35	0.741	0.921	0.172746
289	TTBK2_KAN488-16_4.tif:0001-0044	0.985	136.883	0	590	126.973	4.455	0.853	134.87	12867	1.505	0.665	0.891	1.06198
290	TTBK2_KAN488-16_4.tif:0002-0080	1.174	83.116	0	403	67.012	8.146	0.904	97.576	9309	1.303	0.768	0.914	0.76832
291	TTBK2_KAN488-16_4.tif:0003-0081	0.912	129.057	0	661	86.115	8.289	0.971	117.69	11228	1.113	0.899	0.946	0.926705
292	TTBK2_KAN488-16_4.tif:0004-0181	0.87	193.012	0	627	9.337	18.551	0.926	167.919	16020	1.185	0.844	0.917	1.32221
293	TTBK2_KAN488-16_4.tif:0005-0407	1.31	127.952	0	787	118.477	41.731	0.952	167.647	15994	1.099	0.91	0.923	1.32007
294	TTBK2_KAN488-16_4.tif:0006-0567	1.006	94.406	0	299	31.458	58.067	0.941	94.997	9063	1.292	0.774	0.928	0.748016
295	TTBK2_KAN488-16_4.tif:0007-0673	1.111	171.774	0	1035	113.108	68.984	0.944	190.854	18208	1.16	0.862	0.942	1.5028
296	TTBK2_KAN488-16_4.tif:0008-0687	1.006	173.031	0	712	83.236	70.376	0.986	174.114	16611	1.07	0.934	0.95	1.37099
297	TTBK2_KAN488-16_4.tif:0009-0753	0.943	112.711	0	449	61.126	77.113	0.854	106.328	10144	1.49	0.671	0.914	0.837237
298	TTBK2_KAN488-16_4.tif:0010-0771	1.268	130.496	0	941	48.323	78.984	0.895	165.509	15790	1.121	0.892	0.9	1.30323
299	TTBK2_KAN488-16_4.tif:0011-0862	0.86	110.695	0	444	93.847	88.262	0.934	95.144	9077	1.096	0.913	0.901	0.749172
300	TTBK2_KAN488-16_4.tif:0012-0889	0.629	89.983	0	572	97.236	90.965	0.843	56.592	5399	1.415	0.707	0.916	0.445608
301	TTBK2_KAN488-16_4.tif:0013-0894	1.205	146.313	0	615	135.901	91.598	0.94	176.368	16826	1.216	0.822	0.924	1.38874
302	TTBK2_KAN488-16_4.tif:0014-0973	0.818	227.5	3	863	33.614	99.657	0.949	186.001	17745	1.102	0.907	0.945	1.46459
303	TTBK2_KAN488-16_5.tif:0001-0104	0.828	161.19	0	478	56.858	10.703	0.961	133.476	12734	1.07	0.935	0.946	1.051
304	TTBK2_KAN488-16_5.tif:0002-0135	1.069	138.706	0	818	82.733	13.783	0.859	148.297	14148	1.34	0.746	0.876	1.16771
305	TTBK2_KAN488-16_5.tif:0003-0205	0.734	212.514	0	995	141.308	21.009	0.755	155.928	14876	1.683	0.594	0.864	1.22779
306	TTBK2_KAN488-16_5.tif:0004-0239	0.839	116.188	0	601	17.791	24.424	0.875	97.429	9295	1.172	0.853	0.947	0.767165
307	TTBK2_KAN488-16_5.tif:0005-0401	1.111	59.585	0	261	94.111	41.098	0.733	66.203	6316	1.916	0.522	0.838	0.521292
308	TTBK2_KAN488-16_5.tif:0006-0495	1.006	160.198	0	845	31.541	50.691	0.911	161.201	15379	1.215	0.823	0.91	1.26931
309	TTBK2_KAN488-16_5.tif:0007-0673	1.08	116.864	0	731	98.748	68.894	0.918	126.17	12037	1.233	0.811	0.941	0.993476
310	TTBK2_KAN488-16_5.tif:0008-0799	0.933	106.899	0	538	96.111	81.805	0.946	99.724	9514	1.124	0.89	0.927	0.78524
311	TTBK2_KAN488-16_5.tif:0009-0810	0.671	137.938	0	421	51.805	82.98	0.974	92.534	8828	1.075	0.93	0.941	0.728621
312	TTBK2_KAN488-16_5.tif:0010-0897	1.101	156.676	0	837	121.169	91.833	0.884	172.437	16451	1.331	0.751	0.894	1.35779
313	TTBK2_KAN488-16_5.tif:0011-0927	0.86	135.878	12	400	95.844	94.847	0.915	116.789	11142	1.105	0.905	0.921	0.919607
314	TTBK2_KAN488-16_5.tif:0012-0946	0.964	78.913	0	361	28.875	96.891	0.945	76.098	7260	1.103	0.907	0.934	0.599206
315	TTBK2_KAN488-16_6.tif:0001-0021	1.09	109.058	0	833	95.692	2.161	0.801	118.885	11342	1.563	0.64	0.881	0.936114
316	TTBK2_KAN488-16_6.tif:0002-0105	0.922	98.216	0	348	0.769	10.774	0.949	90.595	8643	1.114	0.898	0.957	0.713352
317	TTBK2_KAN488-16_6.tif:0003-0232	1.352	117.535	0	634	51.271	23.846	0.765	158.926	15162	1.906	0.525	0.878	1.2514
318	TTBK2_KAN488-16_6.tif:0004-0234	1.101	137.886	0	548	87.24	23.94	0.935	151.756	14478	1.359	0.736	0.955	1.19494
319	TTBK2_KAN488-16_6.tif:0005-0276	0.954	54.055	0	262	64.542	28.334	0.892	51.56	4919	1.045	0.957	0.897	0.405991
320	TTBK2_KAN488-16_6.tif:0006-0280	1.101	129.438	0	563	110.119	28.696	0.896	142.459	13591	1.325	0.755	0.921	1.12174
321	TTBK2_KAN488-16_6.tif:0007-0344	0.964	176.326	0	838	15.352	35.196	0.862	170.037	16222	1.374	0.728	0.889	1.33889
322	TTBK2_KAN488-16_6.tif:0008-0343	1.101	130.629	0	771	44.735	35.128	0.907	143.769	13716	1.24	0.806	0.942	1.13205
323	TTBK2_KAN488-16_6.tif:0009-0544	1.258	99.858	0	520	131	55.783	0.898	125.604	11983	1.254	0.797	0.934	0.989019
324	TTBK2_KAN488-16_6.tif:0010-0553	1.331	145.008	0	715	55.617	56.686	0.841	193.034	18416	1.376	0.727	0.907	1.51997
325	TTBK2_KAN488-16_6.tif:0011-0701	0.87	62.976	0	246	5.983	71.872	0.895	54.789	5227	1.315	0.761	0.922	0.431411
326	TTBK2_KAN488-16_6.tif:0012-0763	1.216	166.759	0	995	96.796	78.15	0.948	202.761	19344	1.259	0.794	0.928	1.59656
327	TTBK2_KAN488-16_6.tif:0013-0786	1.31	122.928	0	716	135.614	80.551	0.797	161.064	15366	1.345	0.743	0.871	1.26824
328	TTBK2_KAN488-16_6.tif:0014-0931	0.828	106.899	0	595	15.949	95.335	0.913	88.519	8445	1.297	0.771	0.908	0.69701
329	TTBK2_KAN488-16_6.tif:0015-1014	1.08	169.544	0	923	75.514	103.887	0.918	183.045	17463	1.162	0.86	0.941	1.44131
										11828.3				0.976253
330	TTBK2_KAN488-17_1.tif:0001-0039	0.943	125.067	0	711	94.876	4.02	0.907	117.984	11256	1.239	0.807	0.957	0.929016
331	TTBK2_KAN488-17_1.tif:0002-0122	0.954	54.187	0	230	76.171	12.574	0.837	51.686	4931	1.602	0.624	0.915	0.406981
332	TTBK2_KAN488-17_1.tif:0003-0129	1.069	123.471	0	699	44.836	13.205	0.938	132.009	12594	1.33	0.752	0.94	1.03945
333	TTBK2_KAN488-17_1.tif:0004-0277	1.163	109.928	0	526	136.383	28.362	0.855	127.9	12202	1.59	0.629	0.91	1.00709
334	TTBK2_KAN488-17_1.tif:0005-0309	0.996	232.4	0	685	118.467	31.66	0.932	231.418	22078	1.059	0.945	0.9	1.82221
335	TTBK2_KAN488-17_1.tif:0006-0384	1.017	90.268	0	425	25.455	39.422	0.892	91.779	8756	1.542	0.648	0.942	0.722678
336	TTBK2_KAN488-17_1.tif:0007-0419	1.205	140.139	0	577	93.048	42.939	0.912	168.926	16116	1.29	0.775	0.927	1.33014
337	TTBK2_KAN488-17_1.tif:0008-0662	1.017	137.01	0	463	124.22	67.813	0.88	139.304	13290	1.369	0.731	0.902	1.09689
338	TTBK2_KAN488-17_1.tif:0009-0694	0.88	135.988	0	538	71.687	71.129	0.937	119.734	11423	1.295	0.772	0.933	0.9428
339	TTBK2_KAN488-17_1.tif:0010-0800	1.373	103.435	0	627	84.938	81.932	0.839	142.029	13550	1.448	0.691	0.873	1.11835
340	TTBK2_KAN488-17_1.tif:0011-0859	0.985	122.691	0	628	29.421	87.964	0.904	120.887	11533	1.349	0.741	0.945	0.951878
341	TTBK2_KAN488-17_1.tif:0012-0968	0.713	63.853	0	278	60.373	99.192	0.905	45.512	4342	1.225	0.816	0.919	0.358368
342	TTBK2_KAN488-17_2.tif:0001-0105	1.174	132.473	0	915	106.817	10.797	0.783	155.519	14837	1.121	0.892	0.862	1.22457
343	TTBK2_KAN488-17_2.tif:0002-0175	1.111	103.245	0	637	81.13	17.952	0.794	114.713	10944	1.675	0.597	0.902	0.903265
344	TTBK2_KAN488-17_2.tif:0003-0331	0.702	150.149	0	677	82.961	33.887	0.942	105.448	10060	1.128	0.887	0.964	0.830304
345	TTBK2_KAN488-17_2.tif:0004-0381	0.797	53.355	0	362	59.436	38.999	0.959	42.504	4055	1.298	0.77	0.938	0.33468
346	TTBK2_KAN488-17_2.tif:0005-0494	1.069	60.48	0	362	23.203	50.594	0.926	64.663	6169	1.153	0.867	0.903	0.50916
347	TTBK2_KAN488-17_2.tif:0006-0514	1.111	164.585	0	1105	122.861	52.664	0.866	182.867	17446	1.053	0.949	0.88	1.43991
348	TTBK2_KAN488-17_2.tif:0007-0642	1.331	144.079	0	979	61.169	65.71	0.823	191.797	18298	1.415	0.707	0.882	1.51023
349	TTBK2_KAN488-17_2.tif:0008-0715	1.048	25.64	0	127	128.2	73.225	0.949	26.875	2564	1.155	0.866	0.943	0.21162
350	TTBK2_KAN488-17_2.tif:0009-0768	1.069	180.98	0	932	115.389	78.705	0.909	193.495	18460	1.041	0.961	0.927	1.5236
351	TTBK2_KAN488-17_2.tif:0010-0926	0.797	72.5	0	365	10.883	94.873	0.911	57.755	5510	1.414	0.707	0.91	0.454769
352	TTBK2_KAN488-17_3.tif:0001-0066	0.87	93.277	0	452	76.436	6.803	0.926	81.151	7742	1.211	0.826	0.927	0.638987
353	TTBK2_KAN488-17_3.tif:0002-0153	1.174	129.402	0	816	47.406	15.698	0.853	151.914	14493	1.396	0.716	0.889	1.19618
354	TTBK2_KAN488-17_3.tif:0003-0370	0.702	19.149	0	140	60.06	37.92	0.927	13.448	1283	1.514	0.66	0.944	0.105893
355	TTBK2_KAN488-17_3.tif:0004-0432	1.279	111.082	0	803	81.254	44.252	0.877	142.05	13552	1.447	0.691	0.914	1.11852
356	TTBK2_KAN488-17_3.tif:0005-0451	1.415	120.2	0	1001	139.441	46.282	0.78	170.089	16227	1.691	0.591	0.863	1.3393
357	TTBK2_KAN488-17_3.tif:0006-0595	0.922	187.739	0	1075	60.264	60.957	0.904	173.171	16521	1.285	0.778	0.917	1.36356
358	TTBK2_KAN488-17_3.tif:0007-0608	1.038	68.667	0	341	35.409	62.282	0.952	71.256	6798	1.147	0.872	0.961	0.561074
359	TTBK2_KAN488-17_3.tif:0008-0670	1.31	105.104	0	815	130.917	68.63	0.851	137.711	13138	1.391	0.719	0.906	1.08435
360	TTBK2_KAN488-17_3.tif:0009-0691	1.101	61.752	0	379	6.869	70.779	0.896	67.964	6484	1.406	0.711	0.917	0.535158
361	TTBK2_KAN488-17_3.tif:0010-0837	1.321	138.651	0	823	24.764	85.736	0.862	183.118	17470	1.478	0.677	0.884	1.44189
362	TTBK2_KAN488-17_3.tif:0011-0857	1.279	140.762	0	1066	81.582	87.726	0.877	180.005	17173	1.358	0.736	0.928	1.41738
363	TTBK2_KAN488-17_3.tif:0012-0861	0.943	133.056	0	674	55.382	88.119	0.957	125.52	11975	1.136	0.88	0.933	0.988359
364	TTBK2_KAN488-17_3.tif:0013-0906	1.572	125.28	0	591	109.811	92.642	0.817	196.975	18792	1.632	0.613	0.915	1.551
365	TTBK2_KAN488-17_4.tif:0001-0113	0.891	98.729	0	399	80.054	11.582	0.916	87.964	8392	1.194	0.838	0.924	0.692635
366	TTBK2_KAN488-17_4.tif:0002-0327	1.006	87.281	0	424	119.884	33.507	0.954	87.827	8379	1.105	0.905	0.941	0.691562
367	TTBK2_KAN488-17_4.tif:0003-0481	0.776	32.176	0	95	45.93	49.267	0.843	24.957	2381	1.614	0.619	0.855	0.196516
368	TTBK2_KAN488-17_4.tif:0004-0485	1.08	179.476	0	957	103.693	49.654	0.852	193.768	18486	1.45	0.69	0.916	1.52575
369	TTBK2_KAN488-17_4.tif:0005-0497	0.723	70.638	0	529	34.368	50.837	0.884	51.089	4874	1.331	0.751	0.945	0.402277
370	TTBK2_KAN488-17_4.tif:0006-0627	1.551	119.02	0	670	129.987	64.081	0.696	184.638	17615	1.893	0.528	0.836	1.45386
371	TTBK2_KAN488-17_4.tif:0007-0700	0.891	84.365	0	390	51.515	71.748	0.807	75.165	7171	1.772	0.564	0.885	0.59186
372	TTBK2_KAN488-17_4.tif:0008-0752	1.132	173.852	0	789	124.278	76.969	0.933	196.807	18776	1.215	0.823	0.96	1.54968
373	TTBK2_KAN488-17_4.tif:0009-0781	0.985	101.074	0	500	31.937	80.043	0.733	99.588	9501	1.884	0.531	0.855	0.784167
374	TTBK2_KAN488-17_4.tif:0010-0878	1.017	146.412	0	532	41.347	89.892	0.853	148.863	14202	1.437	0.696	0.907	1.17216
375	TTBK2_KAN488-17_5.tif:0001-0040	1.205	106.47	0	525	98.178	4.073	0.861	128.34	12244	1.286	0.778	0.92	1.01056
376	TTBK2_KAN488-17_5.tif:0002-0046	1.027	145.98	0	759	16.213	4.787	0.811	149.953	14306	1.612	0.62	0.912	1.18075
377	TTBK2_KAN488-17_5.tif:0003-0150	1.08	80.67	0	271	113.831	15.397	0.935	87.094	8309	1.255	0.797	0.924	0.685785
378	TTBK2_KAN488-17_5.tif:0004-0170	0.88	152.31	0	637	80.581	17.4	0.846	134.105	12794	1.35	0.741	0.928	1.05596
379	TTBK2_KAN488-17_5.tif:0005-0436	1.027	141.122	0	839	69.001	44.704	0.811	144.964	13830	1.721	0.581	0.891	1.14146
380	TTBK2_KAN488-17_5.tif:0006-0505	0.818	77.154	0	259	40.948	51.676	0.902	63.08	6018	1.034	0.967	0.897	0.496697
381	TTBK2_KAN488-17_5.tif:0007-0515	1.289	188.846	0	1155	111.468	52.782	0.86	243.473	23228	1.402	0.713	0.921	1.91713
382	TTBK2_KAN488-17_5.tif:0008-0523	0.996	172.232	0	648	91.776	53.614	0.944	171.504	16362	1.342	0.745	0.955	1.35044
383	TTBK2_KAN488-17_5.tif:0009-0578	0.786	69.307	0	272	18.282	59.177	0.912	54.485	5198	1.418	0.705	0.932	0.429018
384	TTBK2_KAN488-17_5.tif:0010-0700	0.964	112.935	0	414	3.882	71.729	0.914	108.907	10390	1.117	0.895	0.925	0.857541
385	TTBK2_KAN488-17_5.tif:0011-0848	1.048	172.64	0	896	79.403	86.87	0.949	180.959	17264	1.249	0.8	0.939	1.42489
386	TTBK2_KAN488-17_5.tif:0012-0949	1.153	103.018	0	582	37.22	97.19	0.955	118.78	11332	1.067	0.937	0.924	0.935289
387	TTBK2_KAN488-17_5.tif:0013-0948	0.839	70.3	0	238	118.131	97.044	0.893	58.95	5624	1.334	0.75	0.925	0.464178
388	TTBK2_KAN488-17_5.tif:0014-1028	0.975	152.28	0	825	9.074	105.281	0.895	148.444	14162	1.301	0.769	0.944	1.16886
389	TTBK2_KAN488-17_5.tif:0015-1033	0.839	118.65	0	826	41.482	105.767	0.939	99.494	9492	1.378	0.725	0.958	0.783424
390	TTBK2_KAN488-17_6.tif:0001-0016	0.901	140.128	0	407	115.754	1.665	0.933	126.317	12051	1.073	0.932	0.878	0.994632
391	TTBK2_KAN488-17_6.tif:0002-0167	0.702	97.015	0	548	84.916	17.141	0.912	68.132	6500	1.256	0.796	0.887	0.536479
392	TTBK2_KAN488-17_6.tif:0003-0187	1.289	83.943	0	336	47.722	19.11	0.936	108.225	10325	1.276	0.784	0.932	0.852176
393	TTBK2_KAN488-17_6.tif:0004-0204	0.86	85.744	0	457	90.557	20.988	0.884	73.698	7031	1.182	0.846	0.927	0.580305
394	TTBK2_KAN488-17_6.tif:0005-0339	1.163	106.495	0	719	121.53	34.74	0.845	123.906	11821	1.407	0.711	0.892	0.975649
395	TTBK2_KAN488-17_6.tif:0006-0351	1.069	78.343	0	391	47.425	35.895	0.897	83.761	7991	1.447	0.691	0.919	0.659539
396	TTBK2_KAN488-17_6.tif:0007-0349	0.723	74.696	0	296	136.78	35.776	0.904	54.024	5154	1.463	0.683	0.908	0.425386
397	TTBK2_KAN488-17_6.tif:0008-0413	1.373	76.206	0	462	125.587	42.319	0.882	104.64	9983	1.408	0.71	0.919	0.823949
398	TTBK2_KAN488-17_6.tif:0009-0478	0.985	78.649	0	269	59.776	48.915	0.904	77.492	7393	1.143	0.875	0.935	0.610183
399	TTBK2_KAN488-17_6.tif:0010-0605	1.048	74.94	0	336	47.535	61.922	0.919	78.551	7494	1.225	0.816	0.93	0.618519
400	TTBK2_KAN488-17_6.tif:0011-0649	1.048	65.1	0	384	7.321	66.513	0.868	68.237	6510	1.208	0.828	0.877	0.537304
401	TTBK2_KAN488-17_6.tif:0012-0659	1.331	93.378	0	688	79.762	67.479	0.832	124.304	11859	1.727	0.579	0.917	0.978785
402	TTBK2_KAN488-17_6.tif:0013-0732	1.3	65.984	0	352	45.515	74.913	0.944	85.763	8182	1.07	0.935	0.929	0.675303
403	TTBK2_KAN488-17_6.tif:0014-0890	0.964	51.652	0	223	129.408	91.096	0.902	49.81	4752	1.297	0.771	0.906	0.392207
404	TTBK2_KAN488-17_6.tif:0015-0925	1.289	173.293	0	1318	109.378	94.729	0.851	223.421	21315	1.244	0.804	0.885	1.75924
405	TTBK2_KAN488-17_6.tif:0016-1022	1.048	114.86	0	535	20.219	104.719	0.919	120.395	11486	1.051	0.951	0.922	0.947999
										11213.7				0.925523
406	TTBK2_KAN488-18_1.tif:0001-0060	0.996	48.284	0	459	84.766	6.135	0.914	48.08	4587	1.216	0.822	0.941	0.378589
407	TTBK2_KAN488-18_1.tif:0002-0139	1.122	136.495	0	766	27.671	14.233	0.885	153.088	14605	1.129	0.886	0.93	1.20543
408	TTBK2_KAN488-18_1.tif:0003-0177	0.943	107.7	0	471	3.471	18.116	0.895	101.601	9693	1.206	0.829	0.928	0.800014
409	TTBK2_KAN488-18_1.tif:0004-0197	0.985	141.936	0	655	115.328	20.148	0.934	139.849	13342	1.097	0.912	0.935	1.10118
410	TTBK2_KAN488-18_1.tif:0005-0286	1.048	194.09	0	986	32.559	29.279	0.907	203.442	19409	1.213	0.824	0.913	1.60193
411	TTBK2_KAN488-18_1.tif:0006-0476	1.174	103.714	0	733	139.202	48.756	0.915	121.757	11616	1.423	0.703	0.922	0.958729
412	TTBK2_KAN488-18_1.tif:0007-0480	1.268	162.273	0	806	101.719	49.131	0.895	205.811	19635	1.547	0.646	0.931	1.62058
413	TTBK2_KAN488-18_1.tif:0008-0527	1.331	110.189	0	816	54.484	53.952	0.823	146.683	13994	1.604	0.624	0.882	1.155
414	TTBK2_KAN488-18_1.tif:0009-0593	1.321	94.952	0	635	2.199	60.671	0.848	125.405	11964	1.519	0.658	0.906	0.987451
415	TTBK2_KAN488-18_1.tif:0010-0836	0.964	54	0	367	112.293	85.612	0.902	52.074	4968	1.17	0.855	0.902	0.410035
416	TTBK2_KAN488-18_1.tif:0011-0962	0.744	128.817	0	556	35.906	98.53	0.945	95.867	9146	1.115	0.897	0.947	0.754867
417	TTBK2_KAN488-18_1.tif:0012-0973	1.038	162.222	0	855	83.6	99.595	0.958	168.339	16060	1.363	0.733	0.925	1.32552
418	TTBK2_KAN488-18_2.tif:0001-0086	0.807	94.143	0	387	82.066	8.833	0.957	75.983	7249	1.203	0.831	0.906	0.598298
419	TTBK2_KAN488-18_2.tif:0002-0182	1.195	124.614	0	488	118.711	18.639	0.788	148.905	14206	1.669	0.599	0.867	1.17249
420	TTBK2_KAN488-18_2.tif:0003-0181	0.87	141.133	0	554	34.275	18.54	0.926	122.784	11714	1.522	0.657	0.938	0.966817
421	TTBK2_KAN488-18_2.tif:0004-0232	1.394	86.857	0	510	41.755	23.841	0.788	121.086	11552	1.211	0.826	0.861	0.953447
422	TTBK2_KAN488-18_2.tif:0005-0500	1.342	156.086	0	885	64.914	51.29	0.852	209.417	19979	1.232	0.812	0.874	1.64897
423	TTBK2_KAN488-18_2.tif:0006-0505	0.975	116.892	0	516	40.219	51.711	0.943	113.948	10871	1.275	0.785	0.912	0.89724
424	TTBK2_KAN488-18_2.tif:0007-0523	0.954	129.813	0	605	19.93	53.568	0.905	123.822	11813	1.256	0.796	0.924	0.974988
425	TTBK2_KAN488-18_2.tif:0008-0587	0.912	62.103	0	407	99.707	60.083	0.865	56.633	5403	1.407	0.711	0.921	0.445938
426	TTBK2_KAN488-18_2.tif:0009-0795	1.195	134.482	0	839	125.554	81.469	0.82	160.697	15331	1.545	0.647	0.894	1.26535
427	TTBK2_KAN488-18_2.tif:0010-0807	0.797	27.803	0	158	46.59	82.7	0.959	22.148	2113	1.159	0.863	0.933	0.174397
428	TTBK2_KAN488-18_2.tif:0011-0836	1.415	118.126	0	635	99.326	85.498	0.865	167.154	15947	1.486	0.673	0.891	1.31619
429	TTBK2_KAN488-18_2.tif:0012-0895	0.922	231.455	0	706	81.304	91.679	0.904	213.495	20368	1.163	0.86	0.917	1.68108
430	TTBK2_KAN488-18_2.tif:0013-0925	0.629	21.417	0	188	43.143	94.684	0.799	13.469	1285	1.997	0.501	0.93	0.106058
431	TTBK2_KAN488-18_3.tif:0001-0045	1.059	46.574	0	296	57.119	4.662	0.959	49.307	4704	1.141	0.876	0.931	0.388246
432	TTBK2_KAN488-18_3.tif:0002-0167	1.237	124.093	0	652	117.555	17.081	0.925	153.486	14643	1.344	0.744	0.915	1.20856
433	TTBK2_KAN488-18_3.tif:0003-0307	0.901	119.058	0	574	60.398	31.419	0.946	107.324	10239	1.185	0.844	0.915	0.845078
434	TTBK2_KAN488-18_3.tif:0004-0331	1.426	108.471	0	693	136.737	34.048	0.723	154.628	14752	1.524	0.656	0.847	1.21756
435	TTBK2_KAN488-18_3.tif:0005-0371	1.122	213.907	0	1182	123.628	37.98	0.913	239.909	22888	1.101	0.908	0.915	1.88907
436	TTBK2_KAN488-18_3.tif:0006-0457	1.038	183.131	0	941	73.938	46.844	0.958	190.036	18130	1.03	0.971	0.917	1.49636
437	TTBK2_KAN488-18_3.tif:0007-0502	1.216	81.698	0	648	28.575	51.478	0.858	99.337	9477	1.232	0.812	0.892	0.782186
438	TTBK2_KAN488-18_3.tif:0008-0583	1.289	126.585	0	699	136.51	59.689	0.936	163.203	15570	1.121	0.892	0.914	1.28507
439	TTBK2_KAN488-18_3.tif:0009-0655	0.954	297.242	5	844	118.842	67.115	0.967	283.524	27049	1.152	0.868	0.929	2.23249
440	TTBK2_KAN488-18_3.tif:0010-0714	1.038	105.475	0	397	107.519	73.131	0.94	109.452	10442	1.274	0.785	0.93	0.861832
441	TTBK2_KAN488-18_3.tif:0011-0802	1.457	148.338	0	903	63.467	82.109	0.776	216.125	20619	1.549	0.646	0.861	1.70179
442	TTBK2_KAN488-18_3.tif:0012-0922	0.901	87.186	0	400	18.623	94.399	0.96	78.593	7498	1.303	0.768	0.956	0.618849
443	TTBK2_KAN488-18_3.tif:0013-1006	1.363	121.838	0	752	114.387	103.017	0.899	166.022	15839	1.088	0.919	0.912	1.30727
444	TTBK2_KAN488-18_4.tif:0001-0151	0.975	52.011	0	616	139.951	15.439	0.912	50.701	4837	1.257	0.795	0.907	0.399223
445	TTBK2_KAN488-18_4.tif:0002-0198	0.996	231.389	0	1190	102.039	20.296	0.902	230.412	21982	1.325	0.755	0.905	1.81429
446	TTBK2_KAN488-18_4.tif:0003-0255	0.901	98.058	0	493	49.212	26.083	0.96	88.394	8433	1.068	0.936	0.945	0.696019
447	TTBK2_KAN488-18_4.tif:0004-0292	0.996	109.4	0	467	33.722	29.889	0.81	108.938	10393	1.278	0.782	0.892	0.857788
448	TTBK2_KAN488-18_4.tif:0005-0314	1.226	156.701	0	954	126.819	32.22	0.876	192.174	18334	1.205	0.83	0.921	1.5132
449	TTBK2_KAN488-18_4.tif:0006-0409	1.184	140.381	0	815	67.453	41.868	0.846	166.274	15863	1.599	0.625	0.908	1.30926
450	TTBK2_KAN488-18_4.tif:0007-0554	1.059	151.743	0	726	38.782	56.758	0.941	160.645	15326	1.118	0.894	0.967	1.26493
451	TTBK2_KAN488-18_4.tif:0008-0570	0.87	179.554	0	639	130.921	58.424	0.926	156.211	14903	1.296	0.771	0.933	1.23002
452	TTBK2_KAN488-18_4.tif:0009-0590	0.713	133.838	0	523	7.108	60.402	0.858	95.395	9101	1.315	0.76	0.883	0.751153
453	TTBK2_KAN488-18_4.tif:0010-0611	0.996	88.505	0	306	8.721	62.566	0.944	88.131	8408	1.289	0.776	0.95	0.693956
454	TTBK2_KAN488-18_4.tif:0011-0846	1.163	168.532	0	891	102.166	86.633	0.798	196.084	18707	1.796	0.557	0.881	1.54399
455	TTBK2_KAN488-18_4.tif:0012-0929	0.87	36.964	0	189	33.885	95.148	0.94	32.158	3068	1.139	0.878	0.96	0.253218
456	TTBK2_KAN488-18_5.tif:0001-0063	1.163	144.36	0	723	52.466	6.484	0.69	167.961	16024	2.363	0.423	0.877	1.32254
457	TTBK2_KAN488-18_5.tif:0002-0075	0.86	68.634	0	385	27.804	7.73	0.948	58.992	5628	1.245	0.803	0.932	0.464508
458	TTBK2_KAN488-18_5.tif:0003-0283	1.31	132.024	0	773	41.017	28.949	0.855	172.982	16503	1.253	0.798	0.887	1.36208
459	TTBK2_KAN488-18_5.tif:0004-0353	0.681	89.692	0	333	85.525	36.187	0.852	61.109	5830	1.274	0.785	0.861	0.48118
460	TTBK2_KAN488-18_5.tif:0005-0434	1.258	149.858	0	782	74.242	44.453	0.817	188.495	17983	1.708	0.585	0.909	1.48423
461	TTBK2_KAN488-18_5.tif:0006-0500	1.562	122.953	0	975	123.048	51.229	0.792	192.028	18320	1.678	0.596	0.879	1.51204
462	TTBK2_KAN488-18_5.tif:0007-0715	1.415	89.504	0	664	3.395	73.229	0.852	126.652	12083	1.401	0.714	0.897	0.997273
463	TTBK2_KAN488-18_5.tif:0008-0725	0.943	132.933	0	619	25.807	74.21	0.938	125.405	11964	1.091	0.916	0.957	0.987451
464	TTBK2_KAN488-18_5.tif:0009-0814	0.88	34.917	0	230	136.518	83.325	0.893	30.743	2933	1.408	0.71	0.908	0.242076
465	TTBK2_KAN488-18_5.tif:0010-0888	1.237	123.034	0	846	47.138	90.905	0.773	152.176	14518	1.558	0.642	0.871	1.19825
466	TTBK2_KAN488-18_5.tif:0011-0890	1.038	87.404	0	346	64.42	91.143	0.971	90.7	8653	1.246	0.802	0.93	0.714177
467	TTBK2_KAN488-18_5.tif:0012-1010	0.786	68.773	2	169	20.486	103.456	0.946	54.065	5158	1.134	0.882	0.926	0.425717
468	TTBK2_KAN488-18_6.tif:0001-0011	0.744	12.324	0	97	70.329	1.18	0.966	9.172	875	1.202	0.832	0.904	0.0722183
469	TTBK2_KAN488-18_6.tif:0002-0036	1.184	106.239	0	655	128.864	3.735	0.813	125.835	12005	1.712	0.584	0.886	0.990835
470	TTBK2_KAN488-18_6.tif:0003-0105	1.017	82.773	0	353	97.712	10.787	0.909	84.159	8029	1.167	0.857	0.911	0.662675
471	TTBK2_KAN488-18_6.tif:0004-0187	1.09	130.5	0	727	32.722	19.193	0.825	142.26	13572	1.613	0.62	0.874	1.12017
472	TTBK2_KAN488-18_6.tif:0005-0253	0.86	41.329	0	132	124.477	25.912	0.872	35.523	3389	1.254	0.797	0.886	0.279712
473	TTBK2_KAN488-18_6.tif:0006-0466	1.31	165.096	0	1147	108.107	47.769	0.851	216.314	20637	1.569	0.638	0.919	1.70328
474	TTBK2_KAN488-18_6.tif:0007-0504	0.681	21.369	0	111	45.956	51.692	0.973	14.559	1389	1.253	0.798	0.929	0.114641
475	TTBK2_KAN488-18_6.tif:0008-0644	1.237	110.873	0	780	23.699	65.964	0.816	137.134	13083	1.579	0.633	0.881	1.07981
476	TTBK2_KAN488-18_6.tif:0009-0671	0.744	61.563	0	281	6.627	68.75	0.945	45.816	4371	1.211	0.826	0.947	0.360761
477	TTBK2_KAN488-18_6.tif:0010-0741	1.163	173.018	0	857	77.021	75.929	0.855	201.304	19205	1.262	0.792	0.902	1.58509
478	TTBK2_KAN488-18_6.tif:0011-0765	0.86	152.939	0	629	138.581	78.321	0.928	131.453	12541	1.216	0.822	0.959	1.03507
479	TTBK2_KAN488-18_6.tif:0012-0826	1.226	97.974	0	521	98.505	84.506	0.866	120.154	11463	1.484	0.674	0.914	0.946101
480	TTBK2_KAN488-18_6.tif:0013-0906	0.755	63.903	0	293	118.456	92.754	0.895	48.227	4601	1.553	0.644	0.889	0.379744
481	TTBK2_KAN488-18_6.tif:0014-0956	0.807	134.143	0	482	6.635	97.844	0.937	108.267	10329	1.157	0.864	0.939	0.852506
										11962.4				0.987317

## Sheet: IF condition
Exp. number	Cell line	Gene induced	Culture condition, fixation condition	rabbit-Alexa488	mouse IgG1-Alexa568	mouse IgG2b-Alexa647	Nuclear stain	Date	Replicate
KAN488-1	RPE-BFP-Cas9 pMCB306 (pool)	Serum starved for 24 hours	Fixed in 4% PFA at RT for 15 minutes.	TTBK2, SIGMA,HPA018113, 1:1000	CEP170, Invitrogen, 41-3200, 1:1000	Ac-Tub, 6B-11, SIGMA, 1:2000	DAPI	2019-05-13	No.2
KAN488-2	RPE-BFP-Cas9 CEP89KO (pool)	Serum starved for 24 hours	Fixed in 4% PFA at RT for 15 minutes.	TTBK2, SIGMA,HPA018113, 1:1000	CEP170, Invitrogen, 41-3200, 1:1000	Ac-Tub, 6B-11, SIGMA, 1:2000	DAPI	2019-05-13	No.2
KAN488-3	RPE-BFP-Cas9 NCS1KO (pool)	Serum starved for 24 hours	Fixed in 4% PFA at RT for 15 minutes.	TTBK2, SIGMA,HPA018113, 1:1000	CEP170, Invitrogen, 41-3200, 1:1000	Ac-Tub, 6B-11, SIGMA, 1:2000	DAPI	2019-05-13	No.2
KAN488-4	RPE-BFP-Cas9 C3orf14KO (pool)	Serum starved for 24 hours	Fixed in 4% PFA at RT for 15 minutes.	TTBK2, SIGMA,HPA018113, 1:1000	CEP170, Invitrogen, 41-3200, 1:1000	Ac-Tub, 6B-11, SIGMA, 1:2000	DAPI	2019-05-13	No.2
KAN488-5	RPE-BFP-Cas9 Rab34KO (pool)	Serum starved for 24 hours	Fixed in 4% PFA at RT for 15 minutes.	TTBK2, SIGMA,HPA018113, 1:1000	CEP170, Invitrogen, 41-3200, 1:1000	Ac-Tub, 6B-11, SIGMA, 1:2000	DAPI	2019-05-13	No.2
KAN488-6	RPE-BFP-Cas9 Myo5AKO (pool)	Serum starved for 24 hours	Fixed in 4% PFA at RT for 15 minutes.	TTBK2, SIGMA,HPA018113, 1:1000	CEP170, Invitrogen, 41-3200, 1:1000	Ac-Tub, 6B-11, SIGMA, 1:2000	DAPI	2019-05-13	No.2
KAN488-7	RPE-BFP-Cas9 pMCB306 (pool)	Serum starved for 24 hours	Fixed in 4% PFA at RT for 15 minutes.	TTBK2, SIGMA,HPA018113, 1:1000	CEP170, Invitrogen, 41-3200, 1:1000	Ac-Tub, 6B-11, SIGMA, 1:2000	DAPI	2019-05-13	No.3
KAN488-8	RPE-BFP-Cas9 CEP89KO (pool)	Serum starved for 24 hours	Fixed in 4% PFA at RT for 15 minutes.	TTBK2, SIGMA,HPA018113, 1:1000	CEP170, Invitrogen, 41-3200, 1:1000	Ac-Tub, 6B-11, SIGMA, 1:2000	DAPI	2019-05-13	No.3
KAN488-9	RPE-BFP-Cas9 NCS1KO (pool)	Serum starved for 24 hours	Fixed in 4% PFA at RT for 15 minutes.	TTBK2, SIGMA,HPA018113, 1:1000	CEP170, Invitrogen, 41-3200, 1:1000	Ac-Tub, 6B-11, SIGMA, 1:2000	DAPI	2019-05-13	No.3
KAN488-10	RPE-BFP-Cas9 C3orf14KO (pool)	Serum starved for 24 hours	Fixed in 4% PFA at RT for 15 minutes.	TTBK2, SIGMA,HPA018113, 1:1000	CEP170, Invitrogen, 41-3200, 1:1000	Ac-Tub, 6B-11, SIGMA, 1:2000	DAPI	2019-05-13	No.3
KAN488-11	RPE-BFP-Cas9 Rab34KO (pool)	Serum starved for 24 hours	Fixed in 4% PFA at RT for 15 minutes.	TTBK2, SIGMA,HPA018113, 1:1000	CEP170, Invitrogen, 41-3200, 1:1000	Ac-Tub, 6B-11, SIGMA, 1:2000	DAPI	2019-05-13	No.3
KAN488-12	RPE-BFP-Cas9 Myo5AKO (pool)	Serum starved for 24 hours	Fixed in 4% PFA at RT for 15 minutes.	TTBK2, SIGMA,HPA018113, 1:1000	CEP170, Invitrogen, 41-3200, 1:1000	Ac-Tub, 6B-11, SIGMA, 1:2000	DAPI	2019-05-13	No.3
KAN488-13	RPE-BFP-Cas9 pMCB306 (pool)	Serum starved for 24 hours	Fixed in 4% PFA at RT for 15 minutes.	TTBK2, SIGMA,HPA018113, 1:1000	CEP170, Invitrogen, 41-3200, 1:1000	Ac-Tub, 6B-11, SIGMA, 1:2000	DAPI	2019-05-13	No.4
KAN488-14	RPE-BFP-Cas9 CEP89KO (pool)	Serum starved for 24 hours	Fixed in 4% PFA at RT for 15 minutes.	TTBK2, SIGMA,HPA018113, 1:1000	CEP170, Invitrogen, 41-3200, 1:1000	Ac-Tub, 6B-11, SIGMA, 1:2000	DAPI	2019-05-13	No.4
KAN488-15	RPE-BFP-Cas9 NCS1KO (pool)	Serum starved for 24 hours	Fixed in 4% PFA at RT for 15 minutes.	TTBK2, SIGMA,HPA018113, 1:1000	CEP170, Invitrogen, 41-3200, 1:1000	Ac-Tub, 6B-11, SIGMA, 1:2000	DAPI	2019-05-13	No.4
KAN488-16	RPE-BFP-Cas9 C3orf14KO (pool)	Serum starved for 24 hours	Fixed in 4% PFA at RT for 15 minutes.	TTBK2, SIGMA,HPA018113, 1:1000	CEP170, Invitrogen, 41-3200, 1:1000	Ac-Tub, 6B-11, SIGMA, 1:2000	DAPI	2019-05-13	No.4
KAN488-17	RPE-BFP-Cas9 Rab34KO (pool)	Serum starved for 24 hours	Fixed in 4% PFA at RT for 15 minutes.	TTBK2, SIGMA,HPA018113, 1:1000	CEP170, Invitrogen, 41-3200, 1:1000	Ac-Tub, 6B-11, SIGMA, 1:2000	DAPI	2019-05-13	No.4
KAN488-18	RPE-BFP-Cas9 Myo5AKO (pool)	Serum starved for 24 hours	Fixed in 4% PFA at RT for 15 minutes.	TTBK2, SIGMA,HPA018113, 1:1000	CEP170, Invitrogen, 41-3200, 1:1000	Ac-Tub, 6B-11, SIGMA, 1:2000	DAPI	2019-05-13	No.4

## Sheet: After ROUT
sgGFP			CEP89 KO			NCS1 KO			C3ORF14 KO
1.18033		1.36455	0.390637		0.241168	1.28711		0.990752	0.641107		0.73803
1.73258		0.991495	0.171973		1.50165	1.20399		0.784414	0.644251		1.39798
1.1953	1.6	0.762047	0.707215	0.352982	0.567099	1.15647	0.481382	0.705676	0.715444	0.984784	1.22581
0.702777	1.29554	1.57741	0.609486	0.106667	0.388493	0.522206	0.322383	0.319659	1.14815	1.30745	0.682401
1.14094	0.868585	1.30414	0.781922	0.745332	0.186447	1.19697	0.990122	0.718386	0.635005	0.361656	1.15904
0.770272	0.731891	0.479282	1.82439	1.54462	0.988689	1.0261	0.423807	0.812642	0.644991	0.891843	0.659951
1.65297	1.25703	1.41498	1.06614	0.0225916	1.47433	0.304836	0.982782	1.32915	0.60172	0.563455	1.58344
0.887047	1.0313	0.190739	0.652017	0.92616	0.971522	0.532469	1.28076	1.31817	0.851173	0.155663	1.2793
1.24283	0.106571	1.6772	0.461738	0.875067	0.816108	0.465621	0.677938	0.922248	0.626961	0.299505	0.521457
0.78636	0.933023	1.01741	0.388233	0.150706	0.741991	0.370759	1.26294	0.375535	2.17444	2.21598	0.806204
1.22165	1.55281	0.755445	1.08102	0.208567	0.408054	0.817703	0.468799	0.458813	0.414954	1.58418	1.54935
1.22323	1.3881	1.84342	2.40697	0.704915	1.25033	1.87053	1.08049	1.03384	0.26101	0.557069	1.18438
0.375751	0.6563	0.214096	1.86997	0.642573	0.43397	1.15018	0.668025	1.03252	1.47277	0.551921	1.27707
1.21638	1.47017	0.424396	0.919407	0.397974	0.599123	0.0419762	0.889079	1.03895	0.59155	0.474137	0.69866
1.18033	0.146416	0.316935	0.762228	1.18306	0.57461	1.18707	0.702436	0.459969	0.662188	0.900613	0.808432
1.73258	0.889651	0.195526	1.46639	0.541245	0.48085	1.05902	0.650581	1.81049	1.32188	0.427715	0.676211
0.276636	0.135359	0.993641	1.30403	0.918248	0.789449	0.730607	1.02539	0.548529	0.914877	1.03712	1.10581
1.33159	0.331629	0.285654	1.33094	0.523038	0.601516	1.96086	0.832266	0.95485	0.817426	1.08049	0.920102
1.20399	0.748287	1.13247	1.37754	0.773833	1.06008	1.23913	0.105618	1.55026	0.660986	0.720929	0.448826
0.541622	0.912529	0.205182	1.58169	1.56673	0.394683	0.778963	0.752195	0.793163	0.664684	1.17457	0.961205
1.1953	0.820256	0.810908	0.979875	0.540959	0.867197	0.675132	0.907762	1.03986	1.39196	0.717593	1.48539
1.39668	0.910241	1.17258	1.01945	0.847518	0.79828	1.00049	1.26093	0.491249	2.15937	0.373857	1.086
1.34989	1.76882	0.794566	2.0106	0.031552	1.20262	0.922551	1.32089	0.386347	0.988751	0.415228	0.865877
0.526551	0.856288	1.34095	1.18754	0.326577	0.188263	0.911456	1.51497	0.641298	1.77474	0.384438	0.482088
1.15462	1.65643	0.795804	1.63818	1.49419	0.184961	1.6073	0.715305	1.27855	0.545598	1.02787	0.324611
1.50458	1.13234	1.9357	0.773878	0.975347	0.356552	1.51327	1.44081	0.34706	0.286436	0.373476	0.410613
1.13521	0.799189	0.763863	0.905724	1.05513	0.416142	2.67908	0.213333	0.38808	2.26801	0.853238	1.15681
1.00354	0.690902	1.61852	0.548186	0.546774	1.08047	0.842482	0.933786	0.906319	0.296977	0.731415	0.999089
0.998922	1.08096	1.03276	1.69911	0.996604	1.91358	0.514254	1.19545	1.69379	0.131199	1.30011	0.155331
0.319814	1.20164	1.29184	1.09989	0.608066	1.08592	1.12577	0.387965	0.479117	0.535057	0.101424	0.694864
0.408759	1.04112	1.66275	0.271551	1.26446	1.10176	1.37024	0.218004	0.386595	0.889173	1.85699	1.11356
1.28147	0.924825	0.278969	1.00752	1.32852	0.213353	0.521928	1.88034	0.293413	1.18754	0.9661	0.172746
0.930133	0.424093	1.21607	0.674207	0.885076	0.407806	0.301045	0.622365	0.611091	1.65824	0.503688	1.06198
0.966931	1.52298	1.42258	0.796068	1.16628	0.285572	1.73166	0.377956	1.44932	2.12839	1.05246	0.76832
1.3106	0.793089	0.734068	2.41631	1.18982	0.478209	1.65935	0.761823	1.04011	0.398311	1.26732	0.926705
0.698062	0.945796	1.86563	1.33186	1.84021	0.0810496	1.86378	1.16847	1.74686	0.898789	0.213143	1.32221
1.10682	0.51484	0.611173	2.25516	0.868203	1.2027	1.5068	1.31994	0.70452	1.23922	1.28763	1.32007
1.28064	1.26866	0.372316	0.921811	0.0407983	0.331544	0.938546	1.37446	1.0756	0.443893	0.359178	0.748016
0.205905	1.11595	0.917379	1.92767	0.344117	0.486297	1.53629	0.301793	1.29019	0.0793294	1.67559	1.5028
0.716923	1.28257	1.1706	1.31115	0.370044	0.4877	1.26872	1.62021	1.24356	0.230776	0.873065	1.37099
0.346072	1.13768	1.29976	0.96989	0.0956091	1.05092	1.22924	0.980875	0.861833	1.02268	0.506929	0.837237
0.51333	0.587667	1.27665	0.878911	0.557831	1.26452	1.15878	0.956377	1.32461	0.197861	1.46454	1.30323
0.775449	1.41612	0.884447	1.17644	0.786225	0.717561	0.894259	1.13549	1.07973	2.14226	0.794995	0.749172
1.43653	1.60143	0.751235	1.25901	1.47227	0.39848	1.10414	1.54805	0.583689	0.505008	0.235925	0.445608
1.36755	1.45215	0.902192	1.62052	0.752576	0.535984	1.88902	1.38743	1.36109	0.175116	0.0856955	1.38874
0.407927	0.730366	0.425882	1.39714	0.114006	0.340953	0.517305		0.904421	1.49117	1.07582	1.46459
0.473388	1.56511	1.75602	1.47	0.603968	1.15566	1.25337		0.449817	0.535242	0.66955	1.051
0.551977	0.703294	0.432319	0.870404	0.163289	0.432319	1.67747		1.19461	1.2113	2.06298	1.16771
0.582211		0.682318	1.11616	0.221245	0.818667	0.964157		0.850195	0.810029	1.97357	1.22779
1.13058		1.73712	1.60332	0.705868	0.20411	0.335532		0.718386	1.07326	0.250795	0.767165
0.672081		0.563468	1.60073	1.19326	0.231429	1.39058		1.31842	1.30496	0.210664	0.521292
0.325639		1.05265	1.63272	1.12634	0.353416	1.36718		0.522695	0.25722	0.359845	1.26931
2.52144		0.535406	0.905446		0.505776	0.62391		0.0927696	1.45946	0.955996	0.993476
1.42747		0.923156	2.78577		0.882384	1.65982		0.311653	1.42062	1.21718	0.78524
1.06105		1.33319	0.48476		0.545062	0.286252		0.32164	1.66555	0.705868	0.728621
1.03933		1.26155	0.268407		0.62669	1.46427		1.01939	2.13135	0.489866	1.35779
2.17684		0.937682	1.21786		2.094	0.44602		1.45097	1.66407	1.16008	0.919607
0.77998		0.633375	0.383795		1.26006	0.49678		0.808927	0.882701	1.10375	0.599206
0.680402		0.537799	2.00126		1.26493	1.4602		0.719955	1.13132		0.936114
1.11736		1.0652	0.714889		0.570071	1.71843		0.874625	1.75819		0.713352
1.11903		0.423901	0.572133		1.01931	2.25423		0.216077	0.320461		1.2514
0.357907		2.28103	0.787654		1.11522	0.768515		0.974493	0.224674		1.19494
0.921441		2.31338	1.94625		0.603167	1.22045		0.695772	0.876044		0.405991
1.47508		1.67109	1.77881		1.02459	0.0877431		0.687188	0.109841		1.12174
0.688261		0.891463	0.682066		0.83344	0.308257		1.21789	1.09212		1.33889
0.718033		1.07188	0.520726		0.547291	0.752427		0.414574	0.769994		1.13205
1.82975		1.58591	1.11588		0.725154	1.24625		0.166143	0.86384		0.989019
0.0584338		1.98968	0.248806		0.949815	0.958147		2.12957	1.29248		1.51997
1.0519		0.97994	0.483281		0.524759	1.6048		1.65301	0.70139		0.431411
1.04376		0.763533	0.445558		1.77492	0.340895		0.584762	1.51641		1.59656
0.492989		1.60118	1.48405		0.713104	0.639258		1.81842	1.44744		1.26824
1.05763		2.47861	0.995686		0.232419	0.373995		1.45105	0.799489		0.69701
1.01177		0.667049	0.923845		0.793163	0.970352		0.511966			1.44131
1.39159		0.436446	1.26492		1.40772	1.14066		0.376691
0.633896		0.891463	0.879558		0.626442	1.28564		1.02319
0.949271		1.20171	1.33695		0.834266	0.147286		0.716736
1.09628		0.788211	1.16072		1.30785	0.720159		0.996943
1.37726		1.02104	1.66555		0.634448	1.08334		1.02187
0.874103		0.353003	0.767498		0.420682
1.50097		0.869426	1.41064		1.1578
1.36487		0.686033	1.76531		1.22804
1.33482		1.41259			0.6498
0.177798		0.438097			0.850443
		0.323373			0.448331
		0.997438			0.833936
		0.353416			1.12669
		1.0028
		0.948907
		1.74273
		1.28705
		0.310497
		0.270633

## Sheet: Statistics
Table Analyzed	Identify outliers of Data 1:Cleaned data
Data sets analyzed	A-F					Compare column means (main column effect)
Nested one-way ANOVA						Number of families	1
P value	0.8945					Number of comparisons per family	5
P value summary	ns					Alpha	0.05
Significantly different (P < 0.05)?	No
F, DFn, Dfd	0.3150, 5, 12					Dunnett's multiple comparisons test	Mean Diff.	95.00% CI of diff.	Below threshold?	Summary	Adjusted P Value
						sgGFP vs. CEP89 KO	0.1185	-0.2492 to 0.4861	No	ns	0.8182
Random effects	SD	Variance				sgGFP vs. NCS1 KO	0.05399	-0.3150 to 0.4230	No	ns	0.9908
Variation within subcolumns	0.4769	0.2274				sgGFP vs. C3ORF14 KO	0.0753	-0.2929 to 0.4435	No	ns	0.9623
Variation among subcolumn means	0.1435	0.02059				sgGFP vs. RAB34 KO	0.1115	-0.2560 to 0.4790	No	ns	0.8484
						sgGFP vs. MYO5A KO	0.1382	-0.2406 to 0.5169	No	ns	0.7436
Do the subcolumns differ (within each column)?
Chi-square, df	38.97, 1					Test details	Mean 1	Mean 2	Mean Diff.	SE of diff.	N1	N2	q	DF
P value	<0.0001					sgGFP vs. CEP89 KO	1	0.8815	0.1185	0.1263	221	217	0.9384	12
P value summary	****					sgGFP vs. NCS1 KO	1	0.946	0.05399	0.1267	221	199	0.4261	12
Is there significant difference between subcolumns (P < 0.05)?	Yes					sgGFP vs. C3ORF14 KO	1	0.9247	0.0753	0.1264	221	201	0.5956	12
						sgGFP vs. RAB34 KO	1	0.8885	0.1115	0.1262	221	222	0.8835	12
Data analyzed						sgGFP vs. MYO5A KO	1	0.8618	0.1382	0.1301	221	164	1.062	12
Number of treatments (columns)	6
Number of subjects (subcolumns)	18
Total number of values	1224
