# Supplementary material for: Myristoylated Neuronal Calcium Sensor-1 captures the preciliary vesicle at distal appendages
Source: eLife. 2025 Jan 30;14:e85998. doi: 10.7554/eLife.85998 (PMC11984960; doi:10.7554/eLife.85998)
Supplement: Figure 2—figure supplement 4—source data 2. [file elife-85998-fig2-figsupp4-data2.xlsx]

## Sheet: RawData_Replicate1
	Label	Area	Mean	Min	Max	X	Y	Circ	IntDen	RawIntDen	AR	Round	Solidity
1	KIZ_KAN500-1_3.tif:0001-0199	1.017	156.68	0	862	66.868	20.405	0.951	159.303	15198	1.279	0.782	0.928	0.964092
2	KIZ_KAN500-1_3.tif:0002-0338	1.331	193.882	0	1577	106.31	34.686	0.878	258.095	24623	1.367	0.731	0.901	1.56197
3	KIZ_KAN500-1_3.tif:0003-0371	1.09	180.288	0	1167	23.341	37.986	0.887	196.535	18750	1.293	0.773	0.916	1.18941
4	KIZ_KAN500-1_3.tif:0004-0375	1.101	172.2	0	828	59.839	38.421	0.88	189.522	18081	1.433	0.698	0.95	1.14698
5	KIZ_KAN500-1_3.tif:0005-0490	0.975	158.978	0	852	51.831	50.238	0.924	154.974	14785	1.414	0.707	0.944	0.937893
6	KIZ_KAN500-1_3.tif:0006-0524	1.321	160.548	0	834	130.988	53.629	0.896	212.038	20229	1.303	0.767	0.91	1.28324
7	KIZ_KAN500-1_3.tif:0007-0681	0.964	164.859	0	872	9.781	69.698	0.945	158.978	15167	1.287	0.777	0.944	0.962125
8	KIZ_KAN500-1_3.tif:0008-0833	0.639	80.574	16	172	121.032	85.311	0.968	51.518	4915	1.17	0.855	0.931	0.311785
9	KIZ_KAN500-1_3.tif:0009-0928	1.321	131.857	0	744	84.128	94.976	0.838	174.146	16614	1.345	0.744	0.866	1.05392
10	KIZ_KAN500-1_3.tif:0010-1019	1.048	252.86	0	1305	118.404	104.326	0.962	265.044	25286	1.339	0.747	0.971	1.60403
11	KIZ_KAN500-1_4.tif:0001-0043	1.258	150.6	0	731	72.626	4.46	0.981	189.428	18072	1.232	0.812	0.941	1.14641
12	KIZ_KAN500-1_4.tif:0002-0109	1.258	150.05	0	916	3.379	11.211	0.914	188.736	18006	1.382	0.723	0.909	1.14222
13	KIZ_KAN500-1_4.tif:0003-0186	0.807	86.156	0	235	33.929	19.073	0.937	69.537	6634	1.28	0.781	0.945	0.420831
14	KIZ_KAN500-1_4.tif:0004-0306	1.174	186.589	0	1166	129.141	31.393	0.915	219.05	20898	1.253	0.798	0.903	1.32567
15	KIZ_KAN500-1_4.tif:0005-0322	1.006	129.844	0	464	66.411	32.975	0.924	130.656	12465	1.425	0.702	0.95	0.790723
16	KIZ_KAN500-1_4.tif:0006-0454	1.111	141.425	0	756	74.096	46.479	0.904	157.134	14991	1.205	0.83	0.922	0.950961
17	KIZ_KAN500-1_4.tif:0007-0538	1.122	142.084	0	701	27.957	55.052	0.924	159.356	15203	1.194	0.837	0.96	0.964409
18	KIZ_KAN500-1_4.tif:0008-0651	1.153	149.091	0	856	116.405	66.681	0.899	171.902	16400	1.15	0.869	0.902	1.04034
19	KIZ_KAN500-1_4.tif:0009-0673	1.184	198.549	0	1349	130.437	68.954	0.896	235.171	22436	1.23	0.813	0.915	1.42324
20	KIZ_KAN500-1_4.tif:0010-0913	1.059	205.079	0	948	116.352	93.468	0.941	217.111	20713	1.351	0.74	0.976	1.31394
21	KIZ_KAN500-1_4.tif:0011-0959	1.027	187.806	0	782	83.704	98.137	0.913	192.919	18405	1.1	0.909	0.956	1.16753
22	KIZ_KAN500-1_5.tif:0001-0007	1.017	212.99	0	818	66.849	0.758	0.933	216.555	20660	1.371	0.73	0.956	1.31058
23	KIZ_KAN500-1_5.tif:0002-0028	1.163	146.874	0	770	137.663	2.909	0.935	170.886	16303	1.189	0.841	0.914	1.03419
24	KIZ_KAN500-1_5.tif:0003-0082	1.216	150.534	0	760	83.263	8.409	0.932	183.034	17462	1.139	0.878	0.947	1.10771
25	KIZ_KAN500-1_5.tif:0004-0181	1.122	196.607	0	1138	4.004	18.565	0.941	220.507	21037	1.236	0.809	0.922	1.33449
26	KIZ_KAN500-1_5.tif:0005-0280	1.446	120.783	0	830	109.828	28.707	0.798	174.712	16668	1.765	0.567	0.905	1.05734
27	KIZ_KAN500-1_5.tif:0006-0331	0.954	144.835	0	375	67.484	33.926	0.905	138.151	13180	1.467	0.682	0.943	0.836079
28	KIZ_KAN500-1_5.tif:0007-0453	0.943	126.511	0	452	40.307	46.416	0.787	119.346	11386	1.745	0.573	0.928	0.722276
29	KIZ_KAN500-1_5.tif:0008-0608	1.237	134.034	0	826	131.894	62.214	0.92	165.781	15816	1.314	0.761	0.967	1.00329
30	KIZ_KAN500-1_5.tif:0009-0627	1.258	138.25	0	739	2.199	64.131	0.786	173.894	16590	1.932	0.517	0.892	1.05239
31	KIZ_KAN500-1_5.tif:0010-0662	0.849	116.864	0	447	31.31	67.748	0.904	99.221	9466	1.118	0.895	0.92	0.60048
32	KIZ_KAN500-1_5.tif:0011-0797	1.174	119.848	0	658	78.122	81.666	0.863	140.698	13423	1.326	0.754	0.907	0.851494
33	KIZ_KAN500-1_5.tif:0012-0839	0.912	158.793	0	700	0.973	85.949	0.938	144.807	13815	1.339	0.747	0.946	0.876361
34	KIZ_KAN500-1_5.tif:0013-0888	0.828	158.886	0	535	17.828	90.956	0.882	131.568	12552	1.462	0.684	0.908	0.796242
35	KIZ_KAN500-1_5.tif:0014-0925	1.174	178.205	0	863	130.292	94.762	0.889	209.207	19959	1.272	0.786	0.914	1.26611
36	KIZ_KAN500-1_6.tif:0001-0064	1.153	149.209	0	857	62.298	6.627	0.922	172.039	16413	1.068	0.937	0.952	1.04117
37	KIZ_KAN500-1_6.tif:0002-0096	1.122	99.336	0	380	98.411	9.773	0.885	111.412	10629	1.386	0.722	0.934	0.674255
38	KIZ_KAN500-1_6.tif:0003-0117	1.163	134.252	0	774	26.204	12.013	0.918	156.201	14902	1.34	0.746	0.933	0.945315
39	KIZ_KAN500-1_6.tif:0004-0131	0.922	232.102	0	900	45.29	13.456	0.949	214.092	20425	1.23	0.813	0.951	1.29567
40	KIZ_KAN500-1_6.tif:0005-0170	1.226	199.316	0	1102	117.578	17.501	0.901	244.437	23320	1.248	0.801	0.921	1.47931
41	KIZ_KAN500-1_6.tif:0006-0312	1.174	121.893	0	750	133.208	31.948	0.938	143.098	13652	1.208	0.828	0.97	0.866021
42	KIZ_KAN500-1_6.tif:0007-0448	1.101	134.629	0	770	69.176	45.893	0.858	148.172	14136	1.513	0.661	0.897	0.896723
43	KIZ_KAN500-1_6.tif:0008-0467	1.048	121.55	0	499	139.868	47.821	0.919	127.407	12155	1.145	0.873	0.935	0.771058
44	KIZ_KAN500-1_6.tif:0009-0556	1.436	112.781	0	624	91.625	57.027	0.772	161.955	15451	1.884	0.531	0.904	0.980141
45	KIZ_KAN500-1_6.tif:0010-0625	0.943	132.133	0	436	12.447	63.976	0.99	124.65	11892	1.233	0.811	0.933	0.754374
46	KIZ_KAN500-1_6.tif:0011-0721	0.922	126.091	0	685	39.598	73.798	0.968	116.307	11096	1.18	0.848	0.926	0.70388
47	KIZ_KAN500-1_6.tif:0012-0727	1.268	110.364	0	815	136.566	74.442	0.921	139.975	13354	1.197	0.835	0.91	0.847117
48	KIZ_KAN500-1_6.tif:0013-0856	0.996	75.242	0	301	71.291	87.605	0.944	74.924	7148	1.26	0.794	0.96	0.453436
49	KIZ_KAN500-1_6.tif:0014-0991	1.184	161.142	0	1180	125.747	101.413	0.896	190.864	18209	1.215	0.823	0.904	1.1551
50	KIZ_KAN500-1_6.tif:0015-0995	0.912	106.126	0	449	93.3	101.928	0.971	96.779	9233	1.209	0.827	0.946	0.585699
										15764.1				1
51	KIZ_KAN500-2_1.tif:0001-0029	0.954	162.154	0	651	5.855	3.004	0.875	154.67	14756	1.627	0.615	0.948	0.936053
52	KIZ_KAN500-2_1.tif:0002-0053	1.352	186.078	0	771	119.635	5.462	0.832	251.607	24004	1.759	0.569	0.952	1.5227
53	KIZ_KAN500-2_1.tif:0003-0128	1.541	190.061	0	947	56.001	13.15	0.871	292.853	27939	1.699	0.589	0.925	1.77232
54	KIZ_KAN500-2_1.tif:0004-0235	1.027	176.592	0	1024	7.042	23.997	0.801	181.399	17306	1.565	0.639	0.86	1.09781
55	KIZ_KAN500-2_1.tif:0005-0333	1.069	198.676	0	1108	38.127	34.111	0.87	212.415	20265	1.574	0.635	0.895	1.28552
56	KIZ_KAN500-2_1.tif:0006-0351	0.933	237.483	0	1210	82.102	35.968	0.946	221.545	21136	1.341	0.746	0.942	1.34077
57	KIZ_KAN500-2_1.tif:0007-0468	1.373	160.298	0	1051	90.937	48.056	0.713	220.109	20999	1.65	0.606	0.821	1.33208
58	KIZ_KAN500-2_1.tif:0008-0501	0.912	90.897	0	283	9.873	51.33	0.837	82.891	7908	1.748	0.572	0.921	0.501647
59	KIZ_KAN500-2_1.tif:0009-0591	1.153	150.291	0	705	96.158	60.517	0.848	173.286	16532	1.5	0.667	0.898	1.04871
60	KIZ_KAN500-2_1.tif:0010-0731	1.017	154.227	0	787	139.098	74.799	0.853	156.809	14960	1.4	0.714	0.886	0.948994
61	KIZ_KAN500-2_1.tif:0011-0759	1.08	255.709	0	1252	110.195	77.761	0.878	276.071	26338	1.481	0.675	0.916	1.67076
62	KIZ_KAN500-2_1.tif:0012-0951	1.122	170.935	0	902	30.005	97.374	0.913	191.713	18290	1.287	0.777	0.926	1.16023
63	KIZ_KAN500-2_2.tif:0001-0051	1.3	281.976	0	1924	72.935	5.189	0.867	366.498	34965	1.333	0.75	0.919	2.21802
64	KIZ_KAN500-2_2.tif:0002-0075	1.394	212.233	0	980	121.422	7.714	0.909	295.871	28227	1.432	0.698	0.905	1.79059
65	KIZ_KAN500-2_2.tif:0003-0218	0.975	226.806	0	1216	16.574	22.391	0.866	221.094	21093	1.661	0.602	0.949	1.33804
66	KIZ_KAN500-2_2.tif:0004-0290	0.964	135.109	2	504	89.251	29.68	0.846	130.29	12430	1.616	0.619	0.911	0.788502
67	KIZ_KAN500-2_2.tif:0005-0451	1.342	239.594	0	1033	105.445	46.139	0.861	321.458	30668	1.565	0.639	0.918	1.94544
68	KIZ_KAN500-2_2.tif:0006-0503	0.996	166.526	0	695	71.194	51.542	0.914	165.823	15820	1.173	0.853	0.941	1.00355
69	KIZ_KAN500-2_2.tif:0007-0657	0.849	156.173	9	425	41.155	67.28	0.904	132.596	12650	1.338	0.748	0.91	0.802458
70	KIZ_KAN500-2_2.tif:0008-0703	0.922	196.318	0	1088	4.968	71.999	0.949	181.085	17276	1.224	0.817	0.951	1.09591
71	KIZ_KAN500-2_2.tif:0009-0827	1.163	168.559	0	962	84.965	84.716	0.907	196.116	18710	1.269	0.788	0.91	1.18688
72	KIZ_KAN500-2_2.tif:0010-0854	1.006	131.24	0	627	50.754	87.478	0.973	132.061	12599	1.175	0.851	0.928	0.799223
73	KIZ_KAN500-2_2.tif:0011-0877	0.86	178.232	0	561	100.703	89.861	0.948	153.192	14615	1.264	0.791	0.921	0.927109
74	KIZ_KAN500-2_3.tif:0001-0044	1.352	180.504	0	1179	125.612	4.429	0.814	244.07	23285	1.852	0.54	0.912	1.47709
75	KIZ_KAN500-2_3.tif:0002-0068	1.237	226.932	0	906	27.147	7.02	0.909	280.683	26778	1.254	0.797	0.937	1.69867
76	KIZ_KAN500-2_3.tif:0003-0070	1.405	139.769	0	942	6.646	7.243	0.803	196.315	18729	1.55	0.645	0.899	1.18808
77	KIZ_KAN500-2_3.tif:0004-0147	1.289	235.098	0	1635	106.456	15.05	0.899	303.104	28917	1.348	0.742	0.904	1.83436
78	KIZ_KAN500-2_3.tif:0005-0206	1.111	265.632	0	1895	53.348	21.08	0.944	295.138	28157	1.164	0.859	0.951	1.78615
79	KIZ_KAN500-2_3.tif:0006-0298	1.31	248.84	0	1325	86.536	30.53	0.952	326.038	31105	1.303	0.768	0.933	1.97316
80	KIZ_KAN500-2_3.tif:0007-0402	1.384	159.841	0	958	116.514	41.166	0.811	221.157	21099	1.456	0.687	0.883	1.33842
81	KIZ_KAN500-2_3.tif:0008-0438	0.943	241.567	0	991	138.494	44.792	0.925	227.886	21741	1.11	0.901	0.933	1.37915
82	KIZ_KAN500-2_3.tif:0009-0461	1.038	165.02	0	766	12.662	47.273	0.91	171.242	16337	1.357	0.737	0.93	1.03634
83	KIZ_KAN500-2_3.tif:0010-0476	0.943	218.7	0	829	58.331	48.75	0.97	206.314	19683	1.087	0.92	0.963	1.2486
84	KIZ_KAN500-2_3.tif:0011-0722	1.195	122.947	0	831	18.966	73.95	0.83	146.914	14016	1.458	0.686	0.908	0.889111
85	KIZ_KAN500-2_3.tif:0012-0768	1.205	103.67	0	459	94.189	78.645	0.886	124.965	11922	1.589	0.629	0.927	0.756277
86	KIZ_KAN500-2_3.tif:0013-0824	0.702	79.433	0	209	117.659	84.387	0.815	55.784	5322	1.644	0.608	0.876	0.337603
87	KIZ_KAN500-2_3.tif:0014-0885	1.143	135.697	0	762	38.353	90.591	0.784	155.037	14791	1.289	0.776	0.855	0.938274
88	KIZ_KAN500-2_3.tif:0015-0926	0.891	143.212	0	438	38.433	94.814	0.949	127.596	12173	1.277	0.783	0.944	0.7722
89	KIZ_KAN500-2_4.tif:0001-0030	0.964	214.37	0	1191	130.776	3.055	0.945	206.723	19722	1.189	0.841	0.929	1.25107
90	KIZ_KAN500-2_4.tif:0002-0104	1.426	188.191	0	742	31.605	10.574	0.836	268.273	25594	1.587	0.63	0.916	1.62357
91	KIZ_KAN500-2_4.tif:0003-0120	1.111	287.981	0	1268	93.087	12.279	0.944	319.969	30526	1.223	0.818	0.951	1.93643
92	KIZ_KAN500-2_4.tif:0004-0186	1.101	161.79	0	898	84.122	19.134	0.777	178.066	16988	1.704	0.587	0.857	1.07764
93	KIZ_KAN500-2_4.tif:0005-0301	1.08	218.078	0	871	108.253	30.812	0.947	235.444	22462	1.263	0.792	0.945	1.42489
94	KIZ_KAN500-2_4.tif:0006-0374	1.027	171.612	0	898	78.899	38.335	0.901	176.284	16818	1.225	0.816	0.916	1.06686
95	KIZ_KAN500-2_4.tif:0007-0423	1.279	192.984	0	1195	123.716	43.36	0.844	246.785	23544	1.279	0.782	0.881	1.49352
96	KIZ_KAN500-2_4.tif:0008-0512	1.017	142.371	0	746	29.353	52.544	0.803	144.754	13810	1.429	0.7	0.87	0.876043
97	KIZ_KAN500-2_4.tif:0009-0552	1.09	148.279	0	793	14.022	56.575	0.769	161.641	15421	1.86	0.538	0.863	0.978238
98	KIZ_KAN500-2_4.tif:0010-0565	1.289	175.74	0	695	59.396	57.896	0.899	226.576	21616	1.518	0.659	0.904	1.37122
99	KIZ_KAN500-2_4.tif:0011-0612	0.818	206.372	9	595	141.275	62.744	0.984	168.726	16097	1.137	0.88	0.951	1.02112
100	KIZ_KAN500-2_4.tif:0012-0719	1.017	163.526	0	890	87.92	73.673	0.88	166.263	15862	1.445	0.692	0.902	1.00621
101	KIZ_KAN500-2_4.tif:0013-0742	1.132	150.046	0	461	39.277	76.017	0.962	169.859	16205	1.133	0.883	0.947	1.02797
102	KIZ_KAN500-2_4.tif:0014-0796	0.901	167.57	0	609	111.257	81.519	0.96	151.054	14411	1.226	0.815	0.95	0.914168
103	KIZ_KAN500-2_4.tif:0015-0976	1.195	135.728	0	710	93.46	100.018	0.82	162.186	15473	1.815	0.551	0.905	0.981536
104	KIZ_KAN500-2_5.tif:0001-0081	1.551	150.791	0	957	69.27	8.186	0.743	233.924	22317	1.899	0.527	0.892	1.41569
105	KIZ_KAN500-2_5.tif:0002-0087	1.226	250.59	0	1481	101.712	8.886	0.94	307.318	29319	1.156	0.865	0.951	1.85986
106	KIZ_KAN500-2_5.tif:0003-0227	1.059	237.446	0	853	120.297	23.218	0.929	251.376	23982	1.19	0.84	0.94	1.52131
107	KIZ_KAN500-2_5.tif:0004-0257	1.174	165.196	0	869	56.817	26.33	0.863	193.935	18502	1.623	0.616	0.914	1.17368
108	KIZ_KAN500-2_5.tif:0005-0304	1.143	237.826	0	1094	107.736	31.087	0.806	271.721	25923	1.582	0.632	0.879	1.64444
109	KIZ_KAN500-2_5.tif:0006-0406	1.048	104.73	0	528	2.31	41.524	0.719	109.777	10473	1.992	0.502	0.826	0.664359
110	KIZ_KAN500-2_5.tif:0007-0433	1.069	181.412	0	1069	23.229	44.331	0.819	193.956	18504	1.6	0.625	0.911	1.17381
111	KIZ_KAN500-2_5.tif:0008-0434	1.122	197.607	0	1073	70.596	44.494	0.913	221.628	21144	1.286	0.778	0.943	1.34128
112	KIZ_KAN500-2_5.tif:0009-0598	0.985	83.947	0	280	55.168	61.188	0.864	82.712	7891	1.574	0.635	0.917	0.500569
113	KIZ_KAN500-2_5.tif:0010-0669	0.922	171.625	0	697	11.824	68.591	0.904	158.308	15103	1.346	0.743	0.931	0.958065
114	KIZ_KAN500-2_5.tif:0011-0781	1.195	170.088	0	527	118.977	79.953	0.904	203.243	19390	1.483	0.674	0.927	1.23001
115	KIZ_KAN500-2_5.tif:0012-0876	1.426	134.566	0	780	79.09	89.791	0.767	191.829	18301	1.657	0.604	0.892	1.16093
116	KIZ_KAN500-2_5.tif:0013-0956	1.467	140.557	0	910	93.934	97.907	0.83	206.262	19678	1.728	0.579	0.895	1.24828
117	KIZ_KAN500-2_6.tif:0001-0031	1.247	244.403	0	1103	69.397	3.16	0.906	304.854	29084	1.387	0.721	0.919	1.84496
118	KIZ_KAN500-2_6.tif:0002-0157	1.184	217.549	0	942	93.421	16.096	0.908	257.676	24583	1.276	0.784	0.938	1.55943
119	KIZ_KAN500-2_6.tif:0003-0199	1.268	137.339	0	848	125.909	20.435	0.86	174.188	16618	1.637	0.611	0.896	1.05417
120	KIZ_KAN500-2_6.tif:0004-0218	1.08	224.631	0	562	52.541	22.349	0.947	242.519	23137	1.059	0.945	0.936	1.46771
121	KIZ_KAN500-2_6.tif:0005-0404	0.912	232.862	0	713	138.122	41.364	0.938	212.352	20259	1.073	0.932	0.941	1.28514
122	KIZ_KAN500-2_6.tif:0006-0413	1.174	160.839	0	800	63.635	42.274	0.815	188.82	18014	1.692	0.591	0.926	1.14273
123	KIZ_KAN500-2_6.tif:0007-0519	0.975	134.591	0	522	58.293	53.207	0.883	131.201	12517	1.44	0.694	0.912	0.794021
124	KIZ_KAN500-2_6.tif:0008-0545	0.88	276.619	1	1213	67.94	55.877	0.937	243.556	23236	1.302	0.768	0.944	1.47399
125	KIZ_KAN500-2_6.tif:0009-0681	0.891	192.153	3	893	69.667	69.728	0.873	171.2	16333	1.302	0.768	0.89	1.03609
126	KIZ_KAN500-2_6.tif:0010-0721	1.017	150.639	0	703	4.475	73.884	0.892	153.161	14612	1.59	0.629	0.919	0.926919
127	KIZ_KAN500-2_6.tif:0011-0724	0.807	148.286	0	634	23.451	74.136	0.859	119.682	11418	1.492	0.67	0.901	0.724306
128	KIZ_KAN500-2_6.tif:0012-0759	0.839	179.25	0	724	110.767	77.693	0.906	150.31	14340	1.147	0.872	0.958	0.909664
129	KIZ_KAN500-2_6.tif:0013-0789	1.059	186.901	13	770	85.018	80.794	0.917	197.866	18877	1.464	0.683	0.906	1.19747
130	KIZ_KAN500-2_6.tif:0014-0843	1.132	154.796	0	633	45.06	86.355	0.921	175.236	16718	1.395	0.717	0.931	1.06051
										19229.5				1.21983
131	KIZ_KAN500-3_1.tif:0001-0194	1.216	221.638	0	1196	98.528	19.869	0.848	269.489	25710	1.612	0.62	0.875	1.63093
132	KIZ_KAN500-3_1.tif:0002-0346	1.53	166.493	0	1194	127.332	35.441	0.803	254.793	24308	1.833	0.546	0.904	1.54199
133	KIZ_KAN500-3_1.tif:0003-0351	1.143	134.56	0	724	16.505	35.901	0.891	153.737	14667	1.237	0.808	0.912	0.930408
134	KIZ_KAN500-3_1.tif:0004-0481	0.985	137.191	0	715	44.673	49.221	0.892	135.174	12896	1.455	0.687	0.913	0.818063
135	KIZ_KAN500-3_1.tif:0005-0504	0.734	61.757	0	135	86.842	51.606	0.968	45.313	4323	1.199	0.834	0.946	0.274231
136	KIZ_KAN500-3_1.tif:0006-0618	1.153	170.273	0	904	68.416	63.271	0.883	196.325	18730	1.415	0.707	0.932	1.18815
137	KIZ_KAN500-3_1.tif:0007-0754	0.964	173.12	0	658	2.18	77.228	0.978	166.945	15927	1.317	0.759	0.944	1.01034
138	KIZ_KAN500-3_1.tif:0008-0843	1.321	230.23	0	1006	112.789	86.322	0.871	304.068	29009	1.463	0.683	0.91	1.8402
139	KIZ_KAN500-3_1.tif:0009-0851	0.765	203.137	12	725	70.39	87.133	0.994	155.435	14829	1.171	0.854	0.93	0.940684
140	KIZ_KAN500-3_2.tif:0001-0146	1.101	255.895	0	941	94.091	14.958	0.935	281.637	26869	1.24	0.807	0.946	1.70445
141	KIZ_KAN500-3_2.tif:0002-0240	0.922	82.773	0	280	9.514	24.532	0.751	76.35	7284	1.751	0.571	0.826	0.462064
142	KIZ_KAN500-3_2.tif:0003-0263	1.876	334.207	0	1429	36.848	26.884	0.92	627.056	59823	1.201	0.833	0.927	3.7949
143	KIZ_KAN500-3_2.tif:0004-0317	1.384	118.864	0	755	101.155	32.367	0.752	164.46	15690	1.624	0.616	0.854	0.995302
144	KIZ_KAN500-3_2.tif:0005-0735	1.373	129.786	0	746	127.804	75.271	0.906	178.213	17002	1.253	0.798	0.916	1.07853
145	KIZ_KAN500-3_2.tif:0006-0843	1.247	138.899	0	587	114.252	86.345	0.832	173.255	16529	1.688	0.592	0.908	1.04852
146	KIZ_KAN500-3_2.tif:0007-0964	1.143	109.376	0	395	73.55	98.748	0.816	124.965	11922	1.778	0.562	0.905	0.756277
147	KIZ_KAN500-3_3.tif:0001-0009	0.786	106.4	0	289	44.007	0.967	0.88	83.645	7980	1.416	0.706	0.932	0.506215
148	KIZ_KAN500-3_3.tif:0002-0045	0.744	38.014	0	102	75.915	4.647	0.945	28.291	2699	1.107	0.903	0.94	0.171212
149	KIZ_KAN500-3_3.tif:0003-0124	1.174	159.92	0	762	56.59	12.699	0.889	187.741	17911	1.352	0.739	0.914	1.13619
150	KIZ_KAN500-3_3.tif:0004-0149	0.744	48.465	0	161	92.814	15.276	0.93	36.068	3441	1.282	0.78	0.916	0.218281
151	KIZ_KAN500-3_3.tif:0005-0195	1.184	255.46	0	1699	100.905	20.004	0.896	302.58	28867	1.271	0.787	0.908	1.83119
152	KIZ_KAN500-3_3.tif:0006-0241	0.65	50.968	0	211	34.151	24.682	0.944	33.123	3160	1.132	0.883	0.932	0.200456
153	KIZ_KAN500-3_3.tif:0007-0321	1.132	118.88	0	566	126.939	32.897	0.894	134.577	12839	1.432	0.698	0.935	0.814448
154	KIZ_KAN500-3_3.tif:0008-0387	0.818	184.41	0	764	69.489	39.673	0.853	150.771	14384	1.528	0.654	0.94	0.912455
155	KIZ_KAN500-3_3.tif:0009-0405	1.163	163.405	0	645	102.154	41.497	0.855	190.12	18138	1.458	0.686	0.921	1.15059
156	KIZ_KAN500-3_3.tif:0010-0499	1.006	201.75	0	921	85.423	51.135	0.954	203.013	19368	1.102	0.908	0.95	1.22862
157	KIZ_KAN500-3_3.tif:0011-0572	1.436	149.358	0	1104	20.788	58.476	0.804	214.48	20462	1.818	0.55	0.878	1.29802
158	KIZ_KAN500-3_3.tif:0012-0618	0.713	2.25	0	10	74.006	63.241	0.803	1.604	153	1.941	0.515	0.861	0.00970562
159	KIZ_KAN500-3_3.tif:0013-0675	1.006	38.021	0	286	0.775	69.16	0.883	38.259	3650	1.556	0.643	0.923	0.231539
160	KIZ_KAN500-3_3.tif:0014-0877	1.226	180.701	0	880	126.836	89.823	0.94	221.607	21142	1.275	0.785	0.959	1.34115
161	KIZ_KAN500-3_3.tif:0015-0885	1.268	180.421	0	1040	83.542	90.588	0.87	228.829	21831	1.409	0.71	0.92	1.38486
162	KIZ_KAN500-3_3.tif:0016-0961	0.87	219.783	0	827	28.223	98.4	0.94	191.21	18242	1.366	0.732	0.976	1.15719
163	KIZ_KAN500-3_4.tif:0001-0041	1.132	171.157	0	815	18.783	4.226	0.883	193.757	18485	1.396	0.716	0.896	1.1726
164	KIZ_KAN500-3_4.tif:0002-0043	1.027	163.286	0	664	127.625	4.404	0.943	167.731	16002	1.341	0.746	0.961	1.01509
165	KIZ_KAN500-3_4.tif:0003-0127	0.901	171.116	0	457	67.545	12.99	0.914	154.251	14716	1.177	0.85	0.905	0.933516
166	KIZ_KAN500-3_4.tif:0004-0226	1.195	241.64	0	1169	112.786	23.152	0.916	288.744	27547	1.29	0.775	0.942	1.74746
167	KIZ_KAN500-3_4.tif:0005-0312	1.205	206.878	0	1221	40.446	31.952	0.886	249.374	23791	1.489	0.671	0.916	1.50919
168	KIZ_KAN500-3_4.tif:0006-0412	1.163	132.883	0	562	112.648	42.191	0.845	154.607	14750	1.705	0.586	0.892	0.935673
169	KIZ_KAN500-3_4.tif:0007-0467	1.048	195.83	0	873	71.605	47.779	0.907	205.266	19583	1.2	0.833	0.905	1.24226
170	KIZ_KAN500-3_4.tif:0008-0486	1.321	125.841	0	658	33.982	49.76	0.804	166.2	15856	1.43	0.7	0.878	1.00583
171	KIZ_KAN500-3_4.tif:0009-0571	1.059	139.248	0	619	81.988	58.466	0.846	147.417	14064	1.469	0.681	0.922	0.892156
172	KIZ_KAN500-3_4.tif:0010-0596	0.985	122.436	0	427	139.188	61.033	0.934	120.636	11509	1.191	0.84	0.94	0.730078
173	KIZ_KAN500-3_4.tif:0011-0777	0.839	126.7	1	507	121.899	79.577	0.925	106.244	10136	1.464	0.683	0.93	0.642982
174	KIZ_KAN500-3_4.tif:0012-0839	0.734	131.357	0	349	59.575	85.877	0.864	96.381	9195	1.408	0.71	0.933	0.583289
175	KIZ_KAN500-3_4.tif:0013-0862	0.797	115.737	0	374	22.698	88.313	0.848	92.198	8796	1.556	0.643	0.884	0.557978
176	KIZ_KAN500-3_4.tif:0014-0866	1.038	187.081	5	826	110.3	88.697	0.94	194.135	18521	1.216	0.822	0.921	1.17489
177	KIZ_KAN500-3_4.tif:0015-0948	0.933	184.393	0	519	95.332	97.101	0.897	172.018	16411	1.3	0.769	0.952	1.04104
178	KIZ_KAN500-3_5.tif:0001-0062	1.373	203.282	0	1065	118.983	6.348	0.882	279.132	26630	1.392	0.718	0.913	1.68929
179	KIZ_KAN500-3_5.tif:0002-0239	1.101	121.676	0	482	124.736	24.53	0.896	133.916	12776	1.432	0.699	0.933	0.810451
180	KIZ_KAN500-3_5.tif:0003-0257	0.86	204.817	0	656	78.117	26.346	0.997	176.043	16795	1.109	0.902	0.965	1.0654
181	KIZ_KAN500-3_5.tif:0004-0395	1.3	153.363	0	820	86.449	40.421	0.812	199.334	19017	1.408	0.71	0.886	1.20635
182	KIZ_KAN500-3_5.tif:0005-0416	1.289	118.13	0	674	35.464	42.642	0.86	152.301	14530	1.551	0.645	0.932	0.921717
183	KIZ_KAN500-3_5.tif:0006-0446	0.786	151.707	0	521	55.615	45.676	0.926	119.263	11378	1.278	0.783	0.974	0.721768
184	KIZ_KAN500-3_5.tif:0007-0456	0.996	154.579	0	696	12.96	46.645	0.914	153.926	14685	1.197	0.835	0.945	0.931549
185	KIZ_KAN500-3_5.tif:0008-0546	1.069	212.088	0	1061	112.773	55.964	1	226.754	21633	1.175	0.851	0.944	1.3723
186	KIZ_KAN500-3_5.tif:0009-0652	1.006	165.625	0	901	40.653	66.782	0.954	166.662	15900	1.354	0.739	0.95	1.00862
187	KIZ_KAN500-3_5.tif:0010-0754	1.09	175.269	0	623	92.412	77.165	0.887	191.063	18228	1.381	0.724	0.933	1.1563
188	KIZ_KAN500-3_5.tif:0011-0796	0.964	227.424	6	852	76.363	81.528	0.945	219.312	20923	1.377	0.726	0.939	1.32726
189	KIZ_KAN500-3_5.tif:0012-0866	0.996	160.579	0	856	19.521	88.698	0.873	159.901	15255	1.518	0.659	0.918	0.967708
190	KIZ_KAN500-3_5.tif:0013-1002	1.006	193.771	0	844	66.839	102.629	0.911	194.984	18602	1.124	0.89	0.919	1.18003
191	KIZ_KAN500-3_5.tif:0014-1030	0.86	143.671	0	551	19.014	105.417	0.884	123.487	11781	1.586	0.631	0.937	0.747333
192	KIZ_KAN500-3_6.tif:0001-0067	1.52	164.897	0	1167	112.182	6.887	0.838	250.621	23910	1.469	0.681	0.89	1.51674
193	KIZ_KAN500-3_6.tif:0002-0070	1.384	168.545	0	1056	43.54	7.223	0.791	233.2	22248	1.892	0.529	0.904	1.41131
194	KIZ_KAN500-3_6.tif:0003-0105	1.101	102.314	0	434	103.155	10.715	0.773	112.607	10743	1.919	0.521	0.938	0.681487
195	KIZ_KAN500-3_6.tif:0004-0239	1.08	220.194	0	969	136.385	24.536	0.935	237.729	22680	1.137	0.879	0.912	1.43872
196	KIZ_KAN500-3_6.tif:0005-0245	1.31	193.936	0	1323	66.366	25.156	0.768	254.101	24242	1.826	0.548	0.862	1.5378
197	KIZ_KAN500-3_6.tif:0006-0266	1.017	162.536	0	735	14.405	27.252	0.921	165.257	15766	1.286	0.777	0.928	1.00012
198	KIZ_KAN500-3_6.tif:0007-0282	0.828	213.329	0	794	126.253	28.916	0.961	176.651	16853	1.341	0.746	0.958	1.06908
199	KIZ_KAN500-3_6.tif:0008-0378	0.786	3.2	0	26	75.496	38.69	0.912	2.516	240	1.196	0.836	0.92	0.0152245
200	KIZ_KAN500-3_6.tif:0009-0421	0.65	121.742	0	409	52.916	43.116	0.782	79.117	7548	1.919	0.521	0.849	0.478811
201	KIZ_KAN500-3_6.tif:0010-0458	1.216	154.353	0	876	92.509	46.893	0.894	187.678	17905	1.357	0.737	0.921	1.13581
202	KIZ_KAN500-3_6.tif:0011-0633	1.75	10.275	0	143	130.057	64.872	0.887	17.987	1716	1.529	0.654	0.944	0.108855
203	KIZ_KAN500-3_6.tif:0012-0665	1.027	141.724	0	790	17.895	68.16	0.801	145.583	13889	1.744	0.574	0.863	0.881055
204	KIZ_KAN500-3_6.tif:0013-0677	1.059	259.792	0	1486	117.101	69.289	0.959	275.034	26239	1.266	0.79	0.935	1.66448
205	KIZ_KAN500-3_6.tif:0014-0846	0.755	109.667	0	414	64.924	86.688	0.845	82.765	7896	1.512	0.662	0.911	0.500886
206	KIZ_KAN500-3_6.tif:0015-0899	0.922	271.625	0	1251	128.757	92.136	0.949	250.548	23903	1.234	0.81	0.957	1.5163
207	KIZ_KAN500-3_6.tif:0016-0903	1.331	118.575	0	809	103.932	92.381	0.761	157.846	15059	1.651	0.606	0.855	0.955274
208	KIZ_KAN500-3_6.tif:0017-1005	1.426	134.882	0	1020	111.718	102.921	0.794	192.279	18344	1.612	0.62	0.883	1.16366
										16364.9				1.03811
209	KIZ_KAN500-4_1.tif:0001-0076	0.671	94.781	0	266	7.192	7.794	0.885	63.583	6066	1.588	0.63	0.914	0.384799
210	KIZ_KAN500-4_1.tif:0002-0079	1.237	123.271	0	496	27.806	8.173	0.909	152.469	14546	1.308	0.765	0.933	0.922732
211	KIZ_KAN500-4_1.tif:0003-0107	1.499	170.699	0	1253	125.067	11.028	0.806	255.862	24410	1.266	0.79	0.872	1.54846
212	KIZ_KAN500-4_1.tif:0004-0134	1.394	140.887	0	1172	46.085	13.703	0.858	196.409	18738	1.182	0.846	0.927	1.18865
213	KIZ_KAN500-4_1.tif:0005-0156	0.933	90.888	0	273	63.114	15.958	0.746	84.788	8089	2.015	0.496	0.894	0.513129
214	KIZ_KAN500-4_1.tif:0006-0241	1.153	167.373	0	981	140.82	24.718	0.883	192.982	18411	1.375	0.727	0.932	1.16791
215	KIZ_KAN500-4_1.tif:0007-0303	0.87	190.169	0	718	24.254	31.078	0.853	165.446	15784	1.667	0.6	0.922	1.00126
216	KIZ_KAN500-4_1.tif:0008-0309	1.415	217.007	0	1320	93.698	31.629	0.861	307.077	29296	1.681	0.595	0.934	1.8584
217	KIZ_KAN500-4_1.tif:0009-0413	1.373	3.107	0	23	43.49	42.277	0.958	4.266	407	1.188	0.842	0.926	0.0258182
218	KIZ_KAN500-4_1.tif:0010-0524	1.384	138.159	0	987	79.853	53.683	0.888	191.158	18237	1.279	0.782	0.907	1.15687
219	KIZ_KAN500-4_1.tif:0011-0566	1.31	125.688	0	614	49.903	57.902	0.841	164.68	15711	1.67	0.599	0.919	0.996634
220	KIZ_KAN500-4_1.tif:0012-0644	0.901	161.965	0	844	98.705	65.952	0.872	146.002	13929	1.266	0.79	0.873	0.883592
221	KIZ_KAN500-4_1.tif:0013-0746	1.268	118.017	0	763	16.558	76.357	0.823	149.681	14280	1.622	0.617	0.91	0.905858
222	KIZ_KAN500-4_1.tif:0014-0858	1.499	144.161	0	1155	114.873	87.861	0.848	216.084	20615	1.704	0.587	0.894	1.30772
223	KIZ_KAN500-4_1.tif:0015-0960	0.86	195.122	0	940	47.67	98.289	0.915	167.71	16000	1.04	0.962	0.921	1.01497
224	KIZ_KAN500-4_2.tif:0001-0007	0.65	142.613	0	506	52.883	0.659	0.858	92.681	8842	1.186	0.843	0.919	0.560896
225	KIZ_KAN500-4_2.tif:0002-0070	1.52	213.634	0	1290	103.618	7.151	0.829	324.697	30977	1.36	0.735	0.873	1.96504
226	KIZ_KAN500-4_2.tif:0003-0142	1.53	187.5	0	1174	87.395	14.554	0.865	286.941	27375	1.411	0.709	0.904	1.73655
227	KIZ_KAN500-4_2.tif:0004-0186	1.289	132.081	0	614	1.752	19.022	0.828	170.288	16246	1.605	0.623	0.898	1.03057
228	KIZ_KAN500-4_2.tif:0005-0230	1.111	132.5	0	671	66.63	23.554	0.962	147.218	14045	1.267	0.789	0.922	0.890951
229	KIZ_KAN500-4_2.tif:0006-0242	1.405	5.03	0	75	79.892	24.758	0.868	7.065	674	1.538	0.65	0.915	0.0427555
230	KIZ_KAN500-4_2.tif:0007-0266	0.996	152.463	0	527	22.728	27.237	0.944	151.819	14484	1.091	0.917	0.95	0.918799
231	KIZ_KAN500-4_2.tif:0008-0412	0.985	129.138	0	600	46.86	42.161	0.802	127.239	12139	1.739	0.575	0.887	0.770043
232	KIZ_KAN500-4_2.tif:0009-0412	0.975	144.269	2	342	121.078	42.146	0.943	140.635	13417	1.226	0.816	0.921	0.851113
233	KIZ_KAN500-4_2.tif:0010-0497	1.426	202.625	0	1471	27.659	50.9	0.858	288.849	27557	1.199	0.834	0.892	1.74809
234	KIZ_KAN500-4_2.tif:0011-0689	1.247	236.168	0	1411	99.328	70.598	0.917	294.582	28104	1.238	0.808	0.93	1.78279
235	KIZ_KAN500-4_2.tif:0012-0730	1.132	160.833	0	581	50.959	74.786	0.95	182.07	17370	1.279	0.782	0.935	1.10187
236	KIZ_KAN500-4_2.tif:0013-0933	0.891	166.894	8	487	67.464	95.535	1	148.696	14186	1.025	0.976	0.939	0.899895
237	KIZ_KAN500-4_3.tif:0001-0050	1.069	216.814	0	1262	139.509	5.171	0.909	231.806	22115	1.477	0.677	0.949	1.40287
238	KIZ_KAN500-4_3.tif:0002-0126	0.734	81.271	0	479	99.767	12.918	0.968	59.631	5689	1.145	0.873	0.952	0.360884
239	KIZ_KAN500-4_3.tif:0003-0212	1.289	251.358	0	1392	52.707	21.746	0.964	324.068	30917	1.339	0.747	0.935	1.96123
240	KIZ_KAN500-4_3.tif:0004-0212	0.996	175.042	0	820	70.454	21.723	0.932	174.303	16629	1.319	0.758	0.922	1.05487
241	KIZ_KAN500-4_3.tif:0005-0408	1.017	210.979	0	741	24.402	41.803	0.933	214.511	20465	1.326	0.754	0.96	1.29821
242	KIZ_KAN500-4_3.tif:0006-0516	1.038	195.717	0	1009	60.178	52.864	0.844	203.097	19376	1.458	0.686	0.896	1.22912
243	KIZ_KAN500-4_3.tif:0007-0517	1.006	276.927	5	1145	141.144	52.934	0.986	278.66	26585	1.214	0.824	0.95	1.68643
244	KIZ_KAN500-4_3.tif:0008-0542	0.901	205.919	2	969	68.761	55.474	0.896	185.623	17709	1.525	0.656	0.956	1.12338
245	KIZ_KAN500-4_3.tif:0009-0573	0.776	271.297	0	843	82.443	58.717	0.948	210.434	20076	1.085	0.922	0.961	1.27353
246	KIZ_KAN500-4_3.tif:0010-0676	0.964	128.391	8	296	45.309	69.233	0.739	123.812	11812	2.12	0.472	0.876	0.749299
247	KIZ_KAN500-4_3.tif:0011-0683	0.681	157.292	0	508	17.168	69.977	0.865	107.167	10224	1.359	0.736	0.922	0.648564
248	KIZ_KAN500-4_3.tif:0012-0825	0.954	156.011	0	776	55.674	84.434	0.811	148.811	14197	1.71	0.585	0.915	0.900593
249	KIZ_KAN500-4_3.tif:0013-0849	0.912	150.701	0	710	34.95	86.896	0.938	137.428	13111	1.143	0.875	0.946	0.831702
250	KIZ_KAN500-4_3.tif:0014-0862	1.017	164.062	0	592	101.734	88.249	0.921	166.808	15914	1.383	0.723	0.924	1.00951
251	KIZ_KAN500-4_3.tif:0015-1017	1.216	178.103	0	1117	96.039	104.089	0.92	216.555	20660	1.463	0.683	0.943	1.31058
252	KIZ_KAN500-4_4.tif:0001-0119	1.342	229.273	0	1133	56.144	12.223	0.958	307.611	29347	1.201	0.833	0.955	1.86164
253	KIZ_KAN500-4_4.tif:0002-0157	1.059	155.762	0	787	37.208	16.136	0.888	164.901	15732	1.465	0.683	0.906	0.997966
254	KIZ_KAN500-4_4.tif:0003-0182	1.132	234.657	0	869	16.219	18.6	0.95	265.642	25343	1.107	0.903	0.927	1.60764
255	KIZ_KAN500-4_4.tif:0004-0253	1.279	89.033	0	387	132.68	25.836	0.75	113.854	10862	1.793	0.558	0.862	0.689036
256	KIZ_KAN500-4_4.tif:0005-0337	1.436	187.664	0	1457	102.662	34.446	0.809	269.489	25710	1.672	0.598	0.935	1.63093
257	KIZ_KAN500-4_4.tif:0006-0453	1.384	233.121	0	1299	87.146	46.342	0.923	322.548	30772	1.166	0.857	0.93	1.95204
258	KIZ_KAN500-4_4.tif:0007-0519	1.174	107.018	0	680	27.114	53.174	0.806	125.636	11986	1.766	0.566	0.9	0.760337
259	KIZ_KAN500-4_4.tif:0008-0573	0.797	58.645	0	238	73.441	58.683	0.721	46.718	4457	2.183	0.458	0.826	0.282732
260	KIZ_KAN500-4_4.tif:0009-0585	1.153	180.736	0	1057	117.038	59.963	0.848	208.39	19881	1.415	0.707	0.898	1.26116
261	KIZ_KAN500-4_4.tif:0010-0665	1.268	145.471	0	994	67.203	68.112	0.823	184.502	17602	1.47	0.68	0.903	1.11659
262	KIZ_KAN500-4_4.tif:0011-0680	1.027	131.112	0	643	51.34	69.617	0.873	134.681	12849	1.245	0.804	0.912	0.815082
263	KIZ_KAN500-4_4.tif:0012-0886	0.639	220.197	0	684	79.766	90.757	0.892	140.792	13432	1.174	0.852	0.917	0.852065
264	KIZ_KAN500-4_4.tif:0013-0892	1.551	178.858	0	1504	132.947	91.291	0.802	277.465	26471	1.465	0.683	0.916	1.6792
265	KIZ_KAN500-4_4.tif:0014-0922	0.964	140.783	0	671	97.845	94.475	0.846	135.761	12952	1.281	0.781	0.902	0.821616
266	KIZ_KAN500-4_4.tif:0015-0935	0.943	199.256	0	1035	51.359	95.702	0.866	187.971	17933	1.464	0.683	0.928	1.13759
267	KIZ_KAN500-4_5.tif:0001-0051	1.384	216.28	0	964	102.875	5.246	0.938	299.247	28549	1.102	0.908	0.93	1.81102
268	KIZ_KAN500-4_5.tif:0002-0131	1.153	78.227	0	621	64.183	13.464	0.8	90.196	8605	1.745	0.573	0.928	0.545862
269	KIZ_KAN500-4_5.tif:0003-0207	1.069	138.794	0	556	19.253	21.235	0.897	148.392	14157	1.365	0.732	0.903	0.898055
270	KIZ_KAN500-4_5.tif:0004-0262	1.101	223.61	0	1139	43.088	26.904	0.907	246.104	23479	1.477	0.677	0.972	1.4894
271	KIZ_KAN500-4_5.tif:0005-0391	1.342	221.023	0	1355	104.029	40.093	0.861	296.542	28291	1.491	0.671	0.918	1.79465
272	KIZ_KAN500-4_5.tif:0006-0433	0.922	222.705	0	921	35.797	44.362	0.949	205.423	19598	1.204	0.831	0.951	1.24321
273	KIZ_KAN500-4_5.tif:0007-0517	1.205	142.583	0	924	69.784	53.01	0.886	171.871	16397	1.439	0.695	0.927	1.04015
274	KIZ_KAN500-4_5.tif:0008-0603	0.985	99.287	7	328	88.182	61.736	0.864	97.827	9333	1.543	0.648	0.917	0.592043
275	KIZ_KAN500-4_5.tif:0009-0609	0.839	94.925	11	221	77.318	62.319	0.959	79.599	7594	1.13	0.885	0.93	0.481729
276	KIZ_KAN500-4_5.tif:0010-0629	0.943	115.267	0	386	49.567	64.414	0.768	108.739	10374	1.866	0.536	0.896	0.658079
277	KIZ_KAN500-4_5.tif:0011-0680	0.891	181.082	0	668	20.27	69.608	1	161.337	15392	1.158	0.864	0.944	0.976398
278	KIZ_KAN500-4_5.tif:0012-0741	1.006	125.406	0	604	120.146	75.917	0.941	126.191	12039	1.292	0.774	0.928	0.763699
279	KIZ_KAN500-4_5.tif:0013-0805	1.069	144.422	0	391	105.026	82.384	0.909	154.408	14731	1.416	0.706	0.949	0.934467
280	KIZ_KAN500-4_5.tif:0014-0839	0.985	182.723	0	849	70.065	85.892	0.904	180.036	17176	1.289	0.776	0.935	1.08957
281	KIZ_KAN500-4_5.tif:0015-0946	1.017	137.474	0	683	64.786	96.834	0.892	139.776	13335	1.319	0.758	0.919	0.845912
282	KIZ_KAN500-4_5.tif:0016-0949	1.268	124.934	0	392	26.947	97.162	0.91	158.454	15117	1.641	0.609	0.917	0.958953
283	KIZ_KAN500-4_5.tif:0017-1033	0.65	83.339	0	289	51.428	105.844	0.907	54.16	5167	1.482	0.675	0.961	0.327771
284	KIZ_KAN500-4_6.tif:0001-0021	1.153	195.791	0	1232	39.45	2.203	0.848	225.748	21537	1.285	0.778	0.891	1.36621
285	KIZ_KAN500-4_6.tif:0002-0062	1.394	186.865	0	1321	104.85	6.402	0.905	260.506	24853	1.231	0.813	0.943	1.57656
286	KIZ_KAN500-4_6.tif:0003-0261	1.258	232.7	0	1323	36.07	26.714	0.952	292.695	27924	1.035	0.966	0.938	1.77137
287	KIZ_KAN500-4_6.tif:0004-0287	1.184	169.752	0	885	74.662	29.497	0.923	201.063	19182	1.413	0.708	0.934	1.21682
288	KIZ_KAN500-4_6.tif:0005-0368	1.09	261.769	0	1449	107.997	37.678	0.835	285.358	27224	1.64	0.61	0.937	1.72697
289	KIZ_KAN500-4_6.tif:0006-0479	0.996	183.768	0	847	60.399	49.063	0.932	182.992	17458	1.444	0.693	0.922	1.10746
290	KIZ_KAN500-4_6.tif:0007-0602	1.226	211.821	0	747	100.814	61.704	0.956	259.772	24783	1.277	0.783	0.94	1.57212
291	KIZ_KAN500-4_6.tif:0008-0697	0.765	127.534	1	305	16.696	71.421	0.921	97.586	9310	1.286	0.777	0.912	0.590584
292	KIZ_KAN500-4_6.tif:0009-0811	0.901	204.372	0	872	37.931	83.073	0.927	184.229	17576	1.309	0.764	0.935	1.11494
293	KIZ_KAN500-4_6.tif:0010-0864	1.017	134.402	0	389	64.008	88.48	0.951	136.652	13037	1.309	0.764	0.937	0.827008
294	KIZ_KAN500-4_6.tif:0011-0885	0.943	180.378	0	710	39.314	90.684	0.99	170.163	16234	1.118	0.894	0.938	1.02981
295	KIZ_KAN500-4_6.tif:0012-0975	1.258	127.525	0	726	97.009	99.957	0.914	160.404	15303	1.398	0.715	0.927	0.970752
296	KIZ_KAN500-4_6.tif:0013-1033	0.723	235.159	0	717	118.945	105.849	0.81	170.079	16226	1.673	0.598	0.939	1.0293
										17167.3				1.08902

## Sheet: RawData_Replicate2
	Label	Area	Mean	Min	Max	X	Y	Circ	IntDen	RawIntDen	AR	Round	Solidity
1	KIZ_KAN503-1_1.tif:0001-0131	1.321	75.008	0	339	1.047	13.421	0.816	99.064	9451	1.671	0.598	0.887	0.379293
2	KIZ_KAN503-1_1.tif:0002-0193	1.897	215.746	0	1818	63.975	19.788	0.859	409.317	39050	1.609	0.622	0.907	1.56718
3	KIZ_KAN503-1_1.tif:0003-0387	1.604	126.013	0	651	109.096	39.585	0.813	202.09	19280	1.845	0.542	0.919	0.773756
4	KIZ_KAN503-1_1.tif:0004-0423	1.457	179.367	0	1324	69.151	43.366	0.824	261.334	24932	1.6	0.625	0.888	1.00059
5	KIZ_KAN503-1_1.tif:0005-0504	1.52	298.393	0	1458	117.433	51.569	0.891	453.519	43267	1.213	0.824	0.927	1.73642
6	KIZ_KAN503-1_1.tif:0006-0739	1.488	132.599	0	1119	41.875	75.709	0.829	197.363	18829	1.265	0.791	0.899	0.755656
7	KIZ_KAN503-1_1.tif:0007-0854	1.436	220.927	0	1586	127.14	87.45	0.874	317.254	30267	1.367	0.732	0.938	1.21469
8	KIZ_KAN503-1_1.tif:0008-0888	1.457	130.144	0	658	71.295	90.919	0.854	189.617	18090	1.515	0.66	0.906	0.725998
9	KIZ_KAN503-1_2.tif:0001-0022	1.195	168.579	0	672	138.654	2.315	0.904	201.44	19218	1.528	0.654	0.923	0.771268
10	KIZ_KAN503-1_2.tif:0002-0067	1.509	214.819	0	1572	11.422	6.824	0.845	324.246	30934	1.644	0.608	0.897	1.24146
11	KIZ_KAN503-1_2.tif:0003-0099	1.646	158.025	0	587	49.592	10.085	0.855	260.055	24810	1.503	0.665	0.913	0.995689
12	KIZ_KAN503-1_2.tif:0004-0114	1.866	230.618	0	2165	61.189	11.686	0.829	430.28	41050	1.592	0.628	0.877	1.64744
13	KIZ_KAN503-1_2.tif:0005-0279	1.101	295.114	0	1688	7.16	28.595	0.953	324.801	30987	1.237	0.809	0.925	1.24359
14	KIZ_KAN503-1_2.tif:0006-0317	1.405	182.858	0	1324	31.565	32.462	0.824	256.837	24503	1.667	0.6	0.899	0.983368
15	KIZ_KAN503-1_2.tif:0007-0390	1.279	202.902	0	1083	73.555	39.949	0.929	259.468	24754	1.171	0.854	0.928	0.993442
16	KIZ_KAN503-1_2.tif:0008-0453	1.31	185.672	0	944	118.31	46.409	0.952	243.273	23209	1.217	0.822	0.926	0.931437
17	KIZ_KAN503-1_2.tif:0009-0516	1.09	179.51	0	686	31.015	52.777	0.927	195.686	18669	1.176	0.85	0.945	0.749235
18	KIZ_KAN503-1_2.tif:0010-0614	1.457	267.95	0	1658	80.79	62.911	0.911	390.397	37245	1.391	0.719	0.936	1.49474
19	KIZ_KAN503-1_2.tif:0011-0678	1.3	240.258	0	1246	129.393	69.446	0.892	312.276	29792	1.54	0.649	0.925	1.19563
20	KIZ_KAN503-1_2.tif:0012-0886	1.499	223.441	0	1228	128.809	90.705	0.818	334.916	31952	1.496	0.668	0.861	1.28232
21	KIZ_KAN503-1_2.tif:0013-0905	1.122	164.495	0	662	32.553	92.659	0.953	184.491	17601	1.214	0.824	0.955	0.706373
22	KIZ_KAN503-1_3.tif:0001-0125	1.111	225.651	0	904	61.528	12.744	0.866	250.716	23919	1.342	0.745	0.887	0.959931
23	KIZ_KAN503-1_3.tif:0002-0203	1.247	107.319	0	336	106.186	20.785	0.891	133.864	12771	1.419	0.705	0.933	0.512533
24	KIZ_KAN503-1_3.tif:0003-0355	1.352	151.519	0	729	61.853	36.371	0.858	204.878	19546	1.675	0.597	0.884	0.784431
25	KIZ_KAN503-1_3.tif:0004-0526	1.331	191.512	0	874	94.163	53.786	0.903	254.94	24322	1.223	0.818	0.914	0.976104
26	KIZ_KAN503-1_3.tif:0005-0646	1.143	151.578	0	787	16.398	66.169	0.84	173.181	16522	1.631	0.613	0.905	0.66307
27	KIZ_KAN503-1_3.tif:0006-0743	1.342	166.883	0	963	111.281	76.073	0.848	223.903	21361	1.641	0.609	0.931	0.857272
28	KIZ_KAN503-1_3.tif:0007-0832	1.08	133.883	0	397	48.823	85.207	0.878	144.545	13790	1.164	0.859	0.892	0.553428
29	KIZ_KAN503-1_3.tif:0008-0894	1.488	184.852	0	1076	116.918	91.573	0.92	275.138	26249	1.461	0.685	0.934	1.05344
30	KIZ_KAN503-1_3.tif:0009-0939	1.656	158.519	0	1081	14.434	96.245	0.831	262.529	25046	1.658	0.603	0.875	1.00516
31	KIZ_KAN503-1_4.tif:0001-0012	1.426	111.993	0	520	56.157	1.331	0.858	159.649	15231	1.31	0.763	0.901	0.611259
32	KIZ_KAN503-1_4.tif:0002-0122	1.52	199.697	0	1471	42.964	12.498	0.817	303.513	28956	1.679	0.596	0.903	1.16208
33	KIZ_KAN503-1_4.tif:0003-0187	1.541	201.435	0	1657	102.487	19.164	0.85	310.378	29611	1.366	0.732	0.896	1.18837
34	KIZ_KAN503-1_4.tif:0004-0233	1.719	174.817	0	1389	24.157	23.91	0.699	300.515	28670	2.309	0.433	0.852	1.1506
35	KIZ_KAN503-1_4.tif:0005-0298	1.247	186.303	0	1162	14.969	30.53	0.832	232.383	22170	1.283	0.779	0.908	0.889739
36	KIZ_KAN503-1_4.tif:0006-0344	1.719	143.848	0	869	100.021	35.223	0.851	247.278	23591	1.429	0.7	0.919	0.946767
37	KIZ_KAN503-1_4.tif:0007-0492	0.996	177.589	4	946	41.241	50.419	0.976	176.839	16871	1.159	0.863	0.95	0.677077
38	KIZ_KAN503-1_4.tif:0008-0557	1.163	175.883	0	967	124.636	57.086	0.947	204.637	19523	1.165	0.858	0.937	0.783508
39	KIZ_KAN503-1_4.tif:0009-0754	1.069	124.343	0	475	64.985	77.228	0.809	132.941	12683	1.62	0.617	0.887	0.509001
40	KIZ_KAN503-1_4.tif:0010-0826	1.551	227.169	0	1637	140.858	84.584	0.787	352.411	33621	2.025	0.494	0.919	1.3493
41	KIZ_KAN503-1_4.tif:0011-0962	1.289	55.862	0	252	91.655	98.403	0.726	72.021	6871	1.882	0.531	0.872	0.275751
42	KIZ_KAN503-1_4.tif:0012-0969	1.541	144.401	0	1097	18.514	99.224	0.871	222.498	21227	1.68	0.595	0.948	0.851894
43	KIZ_KAN503-1_5.tif:0001-0031	1.604	276.758	0	1937	53.077	3.244	0.821	443.844	42344	1.739	0.575	0.924	1.69937
44	KIZ_KAN503-1_5.tif:0002-0171	1.216	252.086	0	1124	76.787	17.524	0.894	306.511	29242	1.411	0.709	0.932	1.17356
45	KIZ_KAN503-1_5.tif:0003-0411	1.31	141.768	0	491	75.031	42.107	0.874	185.749	17721	1.5	0.667	0.919	0.711189
46	KIZ_KAN503-1_5.tif:0004-0586	1.09	134.385	0	580	121.501	60.065	0.887	146.494	13976	1.527	0.655	0.924	0.560893
47	KIZ_KAN503-1_5.tif:0005-0632	1.289	149.748	0	689	85.344	64.798	0.837	193.065	18419	1.676	0.597	0.946	0.739202
48	KIZ_KAN503-1_5.tif:0006-0689	1.52	369.152	0	2639	62.261	70.581	0.939	561.062	53527	1.272	0.786	0.935	2.14818
49	KIZ_KAN503-1_5.tif:0007-0722	1.226	125.829	0	424	37.272	73.907	0.901	154.314	14722	1.392	0.718	0.925	0.590832
50	KIZ_KAN503-1_5.tif:0008-0784	1.509	146.75	0	650	125.991	80.21	0.933	221.503	21132	1.302	0.768	0.938	0.848081
51	KIZ_KAN503-1_5.tif:0009-0834	1.834	4.063	0	24	90.799	85.459	0.831	7.453	711	1.281	0.78	0.902	0.0285343
52	KIZ_KAN503-1_6.tif:0001-0142	1.342	268.359	0	1640	135.563	14.576	0.91	360.052	34350	1.218	0.821	0.921	1.37855
53	KIZ_KAN503-1_6.tif:0002-0152	2.264	189.278	0	1672	50.316	15.598	0.815	428.54	40884	1.388	0.72	0.876	1.64078
54	KIZ_KAN503-1_6.tif:0003-0243	1.541	170.184	0	1039	20.933	24.891	0.652	262.225	25017	2.056	0.486	0.81	1.004
55	KIZ_KAN503-1_6.tif:0004-0363	1.467	226.943	0	1478	50.295	37.216	0.789	333.03	31772	1.562	0.64	0.867	1.27509
56	KIZ_KAN503-1_6.tif:0005-0388	2.222	219.392	0	2105	111.628	39.753	0.8	487.522	46511	1.635	0.612	0.887	1.86661
57	KIZ_KAN503-1_6.tif:0006-0424	1.415	194.496	0	1453	79.536	43.474	0.809	275.222	26257	1.591	0.629	0.891	1.05376
58	KIZ_KAN503-1_6.tif:0007-0511	1.761	150.923	0	1499	22.732	52.401	0.772	265.768	25355	1.604	0.623	0.864	1.01756
59	KIZ_KAN503-1_6.tif:0008-0609	1.488	153.535	0	1083	48.878	62.491	0.873	228.525	21802	1.081	0.925	0.916	0.87497
60	KIZ_KAN503-1_6.tif:0009-0892	2.149	150.546	0	1421	128.376	91.2	0.856	323.491	30862	1.51	0.662	0.919	1.23857
										24917.4				1
61	KIZ_KAN503-2_1.tif:0001-0083	1.216	419.922	0	2033	79.029	8.583	0.92	510.582	48711	1.2	0.834	0.924	1.9549
62	KIZ_KAN503-2_1.tif:0002-0101	1.163	517.901	0	2366	67.212	10.377	0.959	602.571	57487	1.036	0.965	0.965	2.3071
63	KIZ_KAN503-2_1.tif:0003-0121	0.975	178.097	0	663	113.822	12.464	0.895	173.611	16563	1.501	0.666	0.944	0.664716
64	KIZ_KAN503-2_1.tif:0004-0124	1.132	292.694	0	1584	31.812	12.691	0.933	331.342	31611	1.222	0.818	0.956	1.26863
65	KIZ_KAN503-2_1.tif:0005-0221	1.048	154.68	0	661	121.709	22.656	0.891	162.133	15468	1.523	0.657	0.939	0.620771
66	KIZ_KAN503-2_1.tif:0006-0239	1.3	235.048	0	1390	130.453	24.493	0.834	305.504	29146	1.298	0.77	0.873	1.1697
67	KIZ_KAN503-2_1.tif:0007-0278	1.247	380.521	0	1912	99.956	28.461	0.928	474.64	45282	1.1	0.909	0.956	1.81728
68	KIZ_KAN503-2_1.tif:0008-0325	1.111	257.406	0	1416	40.438	33.309	0.904	285.998	27285	1.337	0.748	0.922	1.09502
69	KIZ_KAN503-2_1.tif:0009-0467	1.279	237.475	0	1282	100.448	47.847	0.903	303.68	28972	1.423	0.703	0.938	1.16272
70	KIZ_KAN503-2_1.tif:0010-0478	1.101	311.971	0	1249	22.059	48.951	0.896	343.354	32757	1.318	0.759	0.917	1.31462
71	KIZ_KAN503-2_1.tif:0011-0664	1.258	295.267	0	1559	122.205	68.023	0.925	371.393	35432	1.25	0.8	0.938	1.42198
72	KIZ_KAN503-2_1.tif:0012-0724	0.755	157.639	31	423	85.997	74.06	0.845	118.969	11350	1.34	0.746	0.906	0.455505
73	KIZ_KAN503-2_1.tif:0013-0731	0.891	205.694	2	823	51.597	74.889	0.903	183.265	17484	1.383	0.723	0.895	0.701678
74	KIZ_KAN503-2_1.tif:0014-0746	1.059	171.485	0	628	21.751	76.392	0.861	181.546	17320	1.627	0.615	0.91	0.695096
75	KIZ_KAN503-2_1.tif:0015-0822	1.122	296.028	0	1580	131.652	84.178	0.941	332.013	31675	1.108	0.903	0.922	1.2712
76	KIZ_KAN503-2_1.tif:0016-0828	1.184	245.965	0	1423	101.198	84.853	0.923	291.333	27794	1.233	0.811	0.911	1.11544
77	KIZ_KAN503-2_1.tif:0017-0889	0.901	363.942	0	1124	54.431	91.055	0.927	328.072	31299	1.055	0.947	0.94	1.25611
78	KIZ_KAN503-2_1.tif:0018-0962	1.069	212.647	0	1289	24.857	98.47	0.881	227.352	21690	1.377	0.726	0.932	0.870475
79	KIZ_KAN503-2_1.tif:0019-0983	1.363	266.269	0	1636	74.927	100.613	0.92	362.83	34615	1.389	0.72	0.974	1.38919
80	KIZ_KAN503-2_2.tif:0001-0150	1.3	422.008	0	1563	57.955	15.353	0.972	548.505	52329	1.14	0.877	0.939	2.1001
81	KIZ_KAN503-2_2.tif:0002-0176	1.216	290.155	0	1115	76.261	18.056	0.96	352.798	33658	1.31	0.764	0.955	1.35078
82	KIZ_KAN503-2_2.tif:0003-0183	1.184	280.752	0	1767	29.755	18.776	0.935	332.537	31725	1.278	0.783	0.954	1.27321
83	KIZ_KAN503-2_2.tif:0004-0198	1.069	133.176	0	463	17.883	20.264	0.897	142.386	13584	1.439	0.695	0.911	0.545161
84	KIZ_KAN503-2_2.tif:0005-0269	1.226	317.915	0	1158	78.948	27.525	0.928	389.883	37196	1.227	0.815	0.925	1.49277
85	KIZ_KAN503-2_2.tif:0006-0308	0.681	110.615	1	300	50.051	31.547	1	75.365	7190	1.255	0.797	0.922	0.288553
86	KIZ_KAN503-2_2.tif:0007-0371	1.824	224.776	0	2304	124.452	38.04	0.8	409.956	39111	1.812	0.552	0.888	1.56962
87	KIZ_KAN503-2_2.tif:0008-0472	1.111	163.991	0	853	49.736	48.363	0.916	182.206	17383	1.469	0.681	0.959	0.697624
88	KIZ_KAN503-2_2.tif:0009-0486	1.813	8.89	0	78	99.102	49.752	0.889	16.121	1538	1.181	0.846	0.915	0.0617239
89	KIZ_KAN503-2_2.tif:0010-0598	1.478	226.298	0	1563	105.019	61.307	0.845	334.455	31908	1.423	0.703	0.892	1.28055
90	KIZ_KAN503-2_2.tif:0011-0677	0.933	121.09	7	419	8.519	69.325	0.885	112.963	10777	1.745	0.573	0.937	0.432509
91	KIZ_KAN503-2_2.tif:0012-0794	1.017	8.876	0	68	108.869	81.305	0.892	9.025	861	1.535	0.652	0.933	0.0345541
92	KIZ_KAN503-2_2.tif:0013-0904	1.53	308.027	0	1763	128.869	92.557	0.897	471.39	44972	1.374	0.728	0.93	1.80484
93	KIZ_KAN503-2_2.tif:0014-0910	1.027	126.99	0	455	90.946	93.164	0.901	130.447	12445	1.225	0.816	0.929	0.49945
94	KIZ_KAN503-2_3.tif:0001-0037	1.446	289.645	0	2257	85.031	3.793	0.848	418.97	39971	1.439	0.695	0.905	1.60414
95	KIZ_KAN503-2_3.tif:0002-0095	1.656	290.747	0	2135	73.193	9.715	0.831	481.516	45938	1.688	0.592	0.908	1.84361
96	KIZ_KAN503-2_3.tif:0003-0121	1.289	265.341	0	1187	117.071	12.448	0.936	342.096	32637	1.326	0.754	0.943	1.30981
97	KIZ_KAN503-2_3.tif:0004-0136	1.583	209.212	0	1568	27.709	14.027	0.873	331.132	31591	1.213	0.824	0.918	1.26783
98	KIZ_KAN503-2_3.tif:0005-0326	1.426	144.206	0	1147	37.01	33.378	0.849	205.57	19612	1.649	0.606	0.883	0.78708
99	KIZ_KAN503-2_3.tif:0006-0512	1.384	255.712	0	1360	78.887	52.369	0.949	353.805	33754	1.278	0.783	0.953	1.35463
100	KIZ_KAN503-2_3.tif:0007-0549	1.132	304.185	0	1314	103.136	56.325	0.91	344.35	32852	1.299	0.77	0.919	1.31844
101	KIZ_KAN503-2_3.tif:0008-0553	0.964	188.5	15	466	118.815	56.619	0.978	181.776	17342	1.099	0.91	0.929	0.695979
102	KIZ_KAN503-2_3.tif:0009-0595	1.069	218.931	0	1010	58.123	60.949	0.87	234.07	22331	1.415	0.707	0.903	0.8962
103	KIZ_KAN503-2_3.tif:0010-0675	1.31	213.728	0	1050	26.954	69.139	0.841	280.033	26716	1.544	0.648	0.89	1.07218
104	KIZ_KAN503-2_3.tif:0011-0861	1.132	201.352	0	688	122.13	88.195	0.921	227.939	21746	1.275	0.785	0.939	0.872723
105	KIZ_KAN503-2_3.tif:0012-0920	1.163	186.856	0	873	91.296	94.265	0.881	217.404	20741	1.322	0.757	0.899	0.83239
106	KIZ_KAN503-2_3.tif:0013-0926	0.933	376.888	11	1708	34.727	94.859	0.959	351.593	33543	1.227	0.815	0.957	1.34617
107	KIZ_KAN503-2_3.tif:0014-0950	1.446	281.725	0	1850	71.586	97.277	0.733	407.514	38878	1.853	0.54	0.844	1.56027
108	KIZ_KAN503-2_3.tif:0015-1032	1.205	322.287	0	1822	123.946	105.648	0.952	388.489	37063	1.329	0.753	0.95	1.48743
109	KIZ_KAN503-2_4.tif:0001-0049	1.226	360.299	0	2042	101.228	5.008	0.985	441.863	42155	1.117	0.895	0.936	1.69179
110	KIZ_KAN503-2_4.tif:0002-0072	1.363	167.277	0	786	47.91	7.379	0.865	227.939	21746	1.603	0.624	0.9	0.872723
111	KIZ_KAN503-2_4.tif:0003-0224	1.289	210.106	0	930	118.672	22.99	0.885	270.883	25843	1.477	0.677	0.921	1.03715
112	KIZ_KAN503-2_4.tif:0004-0245	1.205	207.07	0	921	77.424	25.086	0.969	249.605	23813	1.208	0.828	0.927	0.955677
113	KIZ_KAN503-2_4.tif:0005-0247	1.226	232.043	0	1029	21.342	25.24	0.917	284.572	27149	1.307	0.765	0.911	1.08956
114	KIZ_KAN503-2_4.tif:0006-0362	1.09	203.433	0	1178	39.98	37.067	0.887	221.765	21157	1.428	0.701	0.912	0.849085
115	KIZ_KAN503-2_4.tif:0007-0378	1.069	204.127	0	825	67.334	38.735	0.955	218.243	20821	1.145	0.873	0.923	0.8356
116	KIZ_KAN503-2_4.tif:0008-0449	0.901	306.116	0	921	117.837	45.949	0.96	275.945	26326	1.062	0.941	0.94	1.05653
117	KIZ_KAN503-2_4.tif:0009-0479	0.975	119.054	0	339	10.033	49.082	0.924	116.055	11072	1.31	0.763	0.939	0.444348
118	KIZ_KAN503-2_4.tif:0010-0529	0.681	139.031	3	461	16.881	54.217	0.865	94.725	9037	1.334	0.75	0.903	0.362678
119	KIZ_KAN503-2_4.tif:0011-0549	0.776	13.554	0	51	34.606	56.21	0.954	10.513	1003	1.141	0.876	0.886	0.040253
120	KIZ_KAN503-2_4.tif:0012-0631	1.405	187.448	0	1042	81.953	64.698	0.845	263.283	25118	1.671	0.598	0.915	1.00805
121	KIZ_KAN503-2_4.tif:0013-0757	1.426	220.824	0	1252	74.57	77.525	0.905	314.791	30032	1.244	0.804	0.904	1.20526
122	KIZ_KAN503-2_4.tif:0014-0825	1.101	243.781	0	1083	38.008	84.465	0.965	268.304	25597	1.221	0.819	0.955	1.02727
123	KIZ_KAN503-2_4.tif:0015-0895	0.985	184.309	0	938	9.686	91.672	0.837	181.598	17325	1.502	0.666	0.904	0.695297
124	KIZ_KAN503-2_4.tif:0016-0957	1.122	210.785	0	1048	86.271	98.009	0.896	236.408	22554	1.398	0.715	0.964	0.90515
125	KIZ_KAN503-2_4.tif:0017-1032	1.101	500.419	0	2762	123.401	105.72	0.907	550.759	52544	1.42	0.704	0.959	2.10873
126	KIZ_KAN503-2_5.tif:0001-0018	1.488	380.951	0	2354	66.755	1.796	0.92	567.016	54095	1.332	0.751	0.944	2.17097
127	KIZ_KAN503-2_5.tif:0002-0143	1.132	227.306	0	720	135.694	14.589	0.894	257.319	24549	1.316	0.76	0.943	0.985214
128	KIZ_KAN503-2_5.tif:0003-0166	1.625	280.587	0	2391	90.03	17.1	0.887	455.867	43491	1.278	0.783	0.904	1.74541
129	KIZ_KAN503-2_5.tif:0004-0243	1.499	304.986	0	2201	52.757	24.937	0.879	457.145	43613	1.385	0.722	0.923	1.7503
130	KIZ_KAN503-2_5.tif:0005-0245	1.467	241.429	0	1369	100.553	25.105	0.917	354.287	33800	1.355	0.738	0.943	1.35648
131	KIZ_KAN503-2_5.tif:0006-0284	1.321	360.183	0	2117	41.856	29.084	0.971	475.698	45383	1.158	0.864	0.955	1.82134
132	KIZ_KAN503-2_5.tif:0007-0306	1.174	267.902	0	1293	135.394	31.313	0.889	314.508	30005	1.191	0.84	0.914	1.20418
133	KIZ_KAN503-2_5.tif:0008-0392	0.839	213.125	0	587	40.359	40.177	0.973	178.716	17050	1.144	0.874	0.947	0.68426
134	KIZ_KAN503-2_5.tif:0009-0498	1.342	199.266	0	1015	83.127	51.062	0.748	267.35	25506	2.154	0.464	0.911	1.02362
135	KIZ_KAN503-2_5.tif:0010-0662	1.143	240.651	0	1238	56.752	67.803	0.891	274.95	26231	1.331	0.751	0.908	1.05272
136	KIZ_KAN503-2_5.tif:0011-0741	1.006	124.344	0	617	28.083	75.892	0.941	125.122	11937	1.173	0.853	0.919	0.479063
137	KIZ_KAN503-2_5.tif:0012-0764	1.195	266.877	0	1792	102.385	78.274	0.972	318.9	30424	1.277	0.783	0.95	1.22099
138	KIZ_KAN503-2_5.tif:0013-0988	1.31	314.112	0	2271	124.263	101.227	0.874	411.56	39264	1.306	0.765	0.916	1.57577
139	KIZ_KAN503-2_5.tif:0014-0998	1.258	279.267	0	1294	56.714	102.215	0.914	351.268	33512	1.428	0.7	0.927	1.34492
140	KIZ_KAN503-2_6.tif:0001-0114	1.279	338.893	0	1822	81.035	11.707	0.956	433.372	41345	1.203	0.831	0.938	1.65928
141	KIZ_KAN503-2_6.tif:0002-0133	1.132	417.241	0	2204	126.364	13.645	0.921	472.334	45062	1.208	0.828	0.939	1.80845
142	KIZ_KAN503-2_6.tif:0003-0148	1.09	40.481	0	307	107.915	15.094	0.692	44.129	4210	1.424	0.702	0.791	0.168958
143	KIZ_KAN503-2_6.tif:0004-0186	0.849	266.099	33	756	19.857	19.081	1	225.926	21554	1.118	0.894	0.959	0.865017
144	KIZ_KAN503-2_6.tif:0005-0395	1.247	180.899	0	1058	47.525	40.468	0.866	225.643	21527	1.529	0.654	0.944	0.863934
145	KIZ_KAN503-2_6.tif:0006-0493	1.384	228.795	0	911	120.713	50.552	0.888	316.563	30201	1.282	0.78	0.913	1.21204
146	KIZ_KAN503-2_6.tif:0007-0649	1.321	242.429	0	1128	99.419	66.406	0.932	320.179	30546	1.226	0.816	0.937	1.22589
147	KIZ_KAN503-2_6.tif:0008-0750	1.321	253.683	0	1769	79.848	76.819	0.881	335.042	31964	1.445	0.692	0.937	1.2828
148	KIZ_KAN503-2_6.tif:0009-0808	1.08	278.893	0	1010	17.783	82.736	0.978	301.102	28726	1.198	0.835	0.945	1.15285
149	KIZ_KAN503-2_6.tif:0010-0821	1.048	252.92	0	1180	30.712	84.051	0.949	265.107	25292	1.245	0.803	0.939	1.01503
150	KIZ_KAN503-2_6.tif:0011-0878	1.488	245.556	0	1510	94.159	89.867	0.896	365.492	34869	1.431	0.699	0.925	1.39938
151	KIZ_KAN503-2_6.tif:0012-0969	1.321	362.333	0	1777	115.877	99.265	0.959	478.539	45654	1.127	0.888	0.93	1.83221
										28290.5				1.13537
152	KIZ_KAN503-3_1.tif:0001-0015	0.776	82.108	0	243	44.003	1.525	0.787	63.688	6076	1.64	0.61	0.841	0.243846
153	KIZ_KAN503-3_1.tif:0002-0093	1.572	310.473	0	2226	89.686	9.511	0.899	488.151	46571	1.237	0.808	0.932	1.86901
154	KIZ_KAN503-3_1.tif:0003-0249	1.352	307.388	0	1621	22.761	25.533	0.928	415.637	39653	1.07	0.935	0.928	1.59138
155	KIZ_KAN503-3_1.tif:0004-0300	1.405	287.791	0	1247	108.861	30.772	0.912	404.222	38564	1.344	0.744	0.95	1.54767
156	KIZ_KAN503-3_1.tif:0005-0359	0.975	157.011	10	443	39.754	36.782	0.895	153.056	14602	1.337	0.748	0.939	0.586016
157	KIZ_KAN503-3_1.tif:0006-0469	1.866	170.129	0	1485	74.637	48.047	0.7	317.422	30283	2.462	0.406	0.883	1.21533
158	KIZ_KAN503-3_1.tif:0007-0536	1.667	215.503	0	836	127.613	54.882	0.853	359.161	34265	1.411	0.709	0.927	1.37514
159	KIZ_KAN503-3_1.tif:0008-0693	1.394	158.03	0	661	131.393	70.946	0.93	220.308	21018	1.263	0.792	0.947	0.843506
160	KIZ_KAN503-3_1.tif:0009-0729	0.901	233.209	0	1055	44.381	74.663	0.946	210.224	20056	1.048	0.955	0.92	0.804899
161	KIZ_KAN503-3_1.tif:0010-0932	1.656	179.494	0	843	84.845	95.49	0.9	297.266	28360	1.5	0.666	0.955	1.13816
162	KIZ_KAN503-3_1.tif:0011-0963	1.184	171.336	0	849	13.747	98.604	0.912	202.939	19361	1.297	0.771	0.9	0.777007
163	KIZ_KAN503-3_2.tif:0001-0059	1.373	127.931	0	492	124.974	6.049	0.916	175.665	16759	1.524	0.656	0.949	0.672582
164	KIZ_KAN503-3_2.tif:0002-0142	1.593	191.961	0	1282	90.278	14.476	0.848	305.84	29178	1.351	0.74	0.905	1.17099
165	KIZ_KAN503-3_2.tif:0003-0319	1.405	172.284	0	1102	20.285	32.654	0.794	241.984	23086	1.874	0.534	0.879	0.926501
166	KIZ_KAN503-3_2.tif:0004-0356	1.667	169.824	0	1512	123.22	36.446	0.833	283.031	27002	1.534	0.652	0.924	1.08366
167	KIZ_KAN503-3_2.tif:0005-0432	1.457	145.827	0	860	43.033	44.313	0.765	212.467	20270	1.51	0.662	0.871	0.813487
168	KIZ_KAN503-3_2.tif:0006-0533	1.384	176.189	0	1033	98.846	54.702	0.938	243.777	23257	1.141	0.877	0.93	0.933363
169	KIZ_KAN503-3_2.tif:0007-0547	0.797	210.592	40	518	106.676	56.015	0.939	167.762	16005	1.252	0.799	0.974	0.642322
170	KIZ_KAN503-3_2.tif:0008-0602	1.3	136.484	0	856	60.609	61.592	0.812	177.395	16924	1.468	0.681	0.876	0.679204
171	KIZ_KAN503-3_2.tif:0009-0845	1.551	153.041	0	1002	82.082	86.45	0.814	237.414	22650	1.448	0.69	0.902	0.909003
172	KIZ_KAN503-3_2.tif:0010-0863	1.163	149.937	0	442	28.599	88.445	0.947	174.45	16643	1.217	0.822	0.941	0.667926
173	KIZ_KAN503-3_2.tif:0011-0945	1.908	334.473	0	2743	122.259	96.761	0.905	638.073	60874	1.251	0.799	0.931	2.44303
174	KIZ_KAN503-3_3.tif:0001-0156	1.792	215.632	0	1550	61.244	16.007	0.823	386.498	36873	1.812	0.552	0.893	1.47981
175	KIZ_KAN503-3_3.tif:0002-0236	1.31	240.264	0	1211	103.515	24.199	0.952	314.802	30033	1.291	0.775	0.929	1.2053
176	KIZ_KAN503-3_3.tif:0003-0405	1.321	171.214	0	1113	86.682	41.533	0.871	226.125	21573	1.41	0.709	0.91	0.86578
177	KIZ_KAN503-3_3.tif:0004-0418	0.66	80.302	0	208	28.533	42.842	0.724	53.028	5059	2.548	0.392	0.984	0.203031
178	KIZ_KAN503-3_3.tif:0005-0445	1.792	232.708	0	1642	115.515	45.548	0.786	417.105	39793	1.629	0.614	0.875	1.597
179	KIZ_KAN503-3_3.tif:0006-0456	1.3	204.089	0	1355	28.769	46.658	0.834	265.264	25307	1.424	0.702	0.899	1.01563
180	KIZ_KAN503-3_3.tif:0007-0464	1.52	155.51	0	1078	65.348	47.538	0.798	236.355	22549	1.728	0.579	0.898	0.904949
181	KIZ_KAN503-3_3.tif:0008-0654	1.405	127.642	0	990	24.164	67.071	0.791	179.282	17104	1.568	0.638	0.899	0.686427
182	KIZ_KAN503-3_3.tif:0009-0665	1.352	142.612	0	768	58.731	68.1	0.882	192.835	18397	1.641	0.609	0.905	0.738319
183	KIZ_KAN503-3_3.tif:0010-0722	0.922	241.227	0	1206	15.668	73.956	0.904	222.509	21228	1.198	0.835	0.917	0.851934
184	KIZ_KAN503-3_3.tif:0011-0724	1.415	254.363	0	1299	108.883	74.079	0.908	359.937	34339	1.176	0.851	0.925	1.37811
185	KIZ_KAN503-3_3.tif:0012-0787	1.583	180.49	0	1088	72.397	80.529	0.791	285.673	27254	1.564	0.639	0.893	1.09377
186	KIZ_KAN503-3_3.tif:0013-0933	1.509	261.229	0	2144	104.68	95.542	0.854	394.296	37617	1.459	0.685	0.897	1.50967
187	KIZ_KAN503-3_3.tif:0014-1026	0.671	279.547	0	862	24.571	105.094	1	187.531	17891	1.181	0.846	0.955	0.718012
188	KIZ_KAN503-3_4.tif:0001-0033	1.625	250.419	0	1534	81.547	3.388	0.943	406.853	38815	1.142	0.876	0.934	1.55775
189	KIZ_KAN503-3_4.tif:0002-0168	1.992	156.5	0	1005	11.26	17.139	0.843	311.678	29735	1.649	0.606	0.943	1.19334
190	KIZ_KAN503-3_4.tif:0003-0199	1.593	170.757	0	647	50.885	20.43	0.924	272.057	25955	1.222	0.818	0.918	1.04164
191	KIZ_KAN503-3_4.tif:0004-0390	1.593	211.441	0	1747	73.913	39.904	0.752	336.876	32139	1.678	0.596	0.884	1.28982
192	KIZ_KAN503-3_4.tif:0005-0395	1.824	216.052	0	1576	141.118	40.525	0.865	394.045	37593	1.516	0.66	0.911	1.5087
193	KIZ_KAN503-3_4.tif:0006-0470	1.803	209.773	0	1341	100.218	48.152	0.827	378.196	36081	1.617	0.619	0.891	1.44802
194	KIZ_KAN503-3_4.tif:0007-0530	1.268	148.273	0	804	3.999	54.338	0.744	188.055	17941	1.77	0.565	0.849	0.720018
195	KIZ_KAN503-3_4.tif:0008-0565	1.667	156.006	0	1070	5.651	57.795	0.806	260.003	24805	1.946	0.514	0.941	0.995488
196	KIZ_KAN503-3_4.tif:0009-0596	1.562	174.342	0	1350	29.34	61.066	0.849	272.287	25977	1.804	0.554	0.946	1.04252
197	KIZ_KAN503-3_4.tif:0010-0753	1.667	118.698	0	771	51.391	77.1	0.708	197.824	18873	2.217	0.451	0.85	0.757422
198	KIZ_KAN503-3_4.tif:0011-0804	1.048	230.65	0	595	84.872	82.343	0.932	241.764	23065	1.343	0.745	0.971	0.925658
199	KIZ_KAN503-3_4.tif:0012-0831	1.782	264.529	0	1686	130.394	85.094	0.842	471.369	44970	1.635	0.612	0.932	1.80476
200	KIZ_KAN503-3_4.tif:0013-0917	1.059	221.446	0	770	64.917	93.851	0.9	234.437	22366	1.216	0.822	0.931	0.897605
201	KIZ_KAN503-3_4.tif:0014-1010	1.52	245.269	0	1715	117.668	103.475	0.925	372.777	35564	1.377	0.726	0.951	1.42727
202	KIZ_KAN503-3_4.tif:0015-1025	1.457	197.583	0	1369	14.925	104.94	0.833	287.874	27464	1.874	0.534	0.924	1.1022
203	KIZ_KAN503-3_5.tif:0001-0057	1.635	166.385	0	671	102.997	5.99	0.821	272.067	25956	1.517	0.659	0.902	1.04168
204	KIZ_KAN503-3_5.tif:0002-0117	0.996	321.758	0	1396	68.135	11.951	0.944	320.399	30567	1.215	0.823	0.945	1.22673
205	KIZ_KAN503-3_5.tif:0003-0219	1.625	112.477	0	474	23.979	22.419	0.844	182.741	17434	1.075	0.93	0.896	0.699671
206	KIZ_KAN503-3_5.tif:0004-0296	1.405	187.612	0	846	120.154	30.373	0.878	263.514	25140	1.474	0.678	0.931	1.00893
207	KIZ_KAN503-3_5.tif:0005-0313	1.143	241.009	0	990	58.969	32.033	0.865	275.358	26270	1.401	0.714	0.905	1.05428
208	KIZ_KAN503-3_5.tif:0006-0386	0.933	250.966	0	1361	18.399	39.622	0.793	234.123	22336	1.505	0.664	0.877	0.896401
209	KIZ_KAN503-3_5.tif:0007-0390	1.059	194.406	0	1047	40.964	39.959	0.959	205.811	19635	1.125	0.889	0.94	0.788003
210	KIZ_KAN503-3_5.tif:0008-0447	0.901	216.395	21	514	138.37	45.79	0.994	195.067	18610	1.238	0.808	0.956	0.746867
211	KIZ_KAN503-3_5.tif:0009-0520	1.478	164.191	0	1201	64.422	53.132	0.768	242.666	23151	1.56	0.641	0.852	0.929109
212	KIZ_KAN503-3_5.tif:0010-0584	1.268	139.504	0	743	48.49	59.764	0.846	176.934	16880	1.78	0.562	0.91	0.677438
213	KIZ_KAN503-3_5.tif:0011-0586	0.702	191.418	22	377	65.659	60.069	0.892	134.43	12825	1.686	0.593	0.937	0.5147
214	KIZ_KAN503-3_5.tif:0012-0663	1.195	106.096	0	301	103.97	67.942	0.83	126.778	12095	1.569	0.637	0.916	0.485403
215	KIZ_KAN503-3_5.tif:0013-0719	1.258	204.6	0	926	1.364	73.713	0.853	257.351	24552	1.377	0.726	0.879	0.985335
216	KIZ_KAN503-3_5.tif:0014-0762	1.478	209.66	0	882	124.34	78.043	0.89	309.865	29562	1.299	0.77	0.916	1.1864
217	KIZ_KAN503-3_5.tif:0015-0765	1.143	213.055	0	924	57.685	78.352	0.93	243.42	23223	1.08	0.926	0.924	0.931999
218	KIZ_KAN503-3_5.tif:0016-0811	1.279	161.361	0	897	22.018	82.989	0.903	206.346	19686	1.084	0.922	0.917	0.79005
219	KIZ_KAN503-3_5.tif:0017-0820	1.111	202.981	0	955	79.094	83.949	0.962	225.528	21516	1.112	0.9	0.922	0.863492
220	KIZ_KAN503-3_5.tif:0018-0889	0.933	84.36	0	264	71.571	91.039	0.694	78.698	7508	2.476	0.404	0.873	0.301315
221	KIZ_KAN503-3_5.tif:0019-0891	0.828	153.658	2	456	43.231	91.291	0.947	127.239	12139	1.397	0.716	0.919	0.487169
222	KIZ_KAN503-3_5.tif:0020-1017	1.436	163.803	0	790	119.365	104.129	0.874	235.223	22441	1.595	0.627	0.942	0.900615
223	KIZ_KAN503-3_6.tif:0001-0042	2.117	9.292	0	72	67.152	4.33	0.715	19.674	1877	1.477	0.677	0.828	0.0753288
224	KIZ_KAN503-3_6.tif:0002-0046	1.719	245.604	0	1793	81.429	4.713	0.796	422.199	40279	1.697	0.589	0.884	1.6165
225	KIZ_KAN503-3_6.tif:0003-0051	0.86	83.073	0	248	64.529	5.196	0.884	71.402	6812	1.046	0.956	0.921	0.273383
226	KIZ_KAN503-3_6.tif:0004-0115	1.226	171.718	0	700	45.331	11.786	0.828	210.591	20091	1.775	0.563	0.944	0.806303
227	KIZ_KAN503-3_6.tif:0005-0121	1.604	182.51	0	1542	11.045	12.38	0.863	292.695	27924	1.575	0.635	0.942	1.12066
228	KIZ_KAN503-3_6.tif:0006-0351	1.625	177.748	0	898	117.388	35.923	0.844	288.786	27551	1.642	0.609	0.906	1.10569
229	KIZ_KAN503-3_6.tif:0007-0437	1.562	235.557	0	1722	7.221	44.768	0.811	367.892	35098	1.564	0.639	0.911	1.40857
230	KIZ_KAN503-3_6.tif:0008-0435	1.143	192.596	0	1049	53.894	44.552	0.902	220.046	20993	1.423	0.703	0.932	0.842503
231	KIZ_KAN503-3_6.tif:0009-0551	0.964	335.402	0	1988	118.341	56.384	0.897	323.439	30857	1.041	0.961	0.963	1.23837
232	KIZ_KAN503-3_6.tif:0010-0636	1.457	71.827	0	356	109.216	65.248	0.765	104.651	9984	1.704	0.587	0.871	0.400684
233	KIZ_KAN503-3_6.tif:0011-0852	1.394	317.105	0	1911	105.932	87.245	0.92	442.072	42175	1.227	0.815	0.927	1.69259
234	KIZ_KAN503-3_6.tif:0012-0908	1.132	210.509	0	1210	47.346	93.043	0.921	238.305	22735	1.203	0.832	0.943	0.912414
235	KIZ_KAN503-3_6.tif:0013-0919	1.551	271.115	0	2145	123.249	94.047	0.887	420.585	40125	1.158	0.864	0.928	1.61032
236	KIZ_KAN503-3_6.tif:0014-0951	1.289	240.87	0	952	19.687	97.386	0.895	310.546	29627	1.229	0.814	0.935	1.18901
										25123.2				1.00826
237	KIZ_KAN503-4_1.tif:0001-0021	1.373	403.893	0	2841	107.831	2.207	0.916	554.595	52910	1.167	0.857	0.936	2.12341
238	KIZ_KAN503-4_1.tif:0002-0157	1.614	207.481	0	1224	79.684	16.083	0.913	334.916	31952	1.486	0.673	0.928	1.28232
239	KIZ_KAN503-4_1.tif:0003-0190	1.593	128.757	0	566	119.908	19.556	0.828	205.14	19571	1.546	0.647	0.907	0.785435
240	KIZ_KAN503-4_1.tif:0004-0354	1.562	201.342	0	1676	58.267	36.297	0.792	314.456	30000	1.708	0.586	0.882	1.20398
241	KIZ_KAN503-4_1.tif:0005-0435	1.3	344.742	0	2029	32.605	44.589	0.944	448.079	42748	1.28	0.781	0.939	1.71559
242	KIZ_KAN503-4_1.tif:0006-0565	1.73	207.048	0	2182	78.915	57.854	0.836	358.092	34163	1.668	0.6	0.922	1.37105
243	KIZ_KAN503-4_1.tif:0007-0721	1.593	206.809	0	1531	1.367	73.936	0.789	329.497	31435	1.588	0.63	0.891	1.26157
244	KIZ_KAN503-4_1.tif:0008-0738	1.478	241.326	0	1831	119.17	75.637	0.88	356.666	34027	1.282	0.78	0.904	1.36559
245	KIZ_KAN503-4_1.tif:0009-0865	1.268	315.182	0	1983	102.057	88.599	0.921	399.747	38137	1.421	0.704	0.917	1.53054
246	KIZ_KAN503-4_1.tif:0010-0872	1.467	160.343	0	1366	17.881	89.251	0.842	235.297	22448	1.702	0.587	0.889	0.900896
247	KIZ_KAN503-4_1.tif:0011-0950	1.363	214.823	0	1217	48.486	97.277	0.951	292.727	27927	1.231	0.813	0.932	1.12078
248	KIZ_KAN503-4_2.tif:0001-0044	1.143	302.67	0	1303	30.171	4.501	0.959	345.807	32991	1.074	0.931	0.936	1.32401
249	KIZ_KAN503-4_2.tif:0002-0071	1.352	196.008	0	682	51.289	7.271	0.928	265.034	25285	1.14	0.877	0.938	1.01475
250	KIZ_KAN503-4_2.tif:0003-0103	1.782	215.318	0	1962	22.627	10.538	0.826	383.678	36604	1.517	0.659	0.895	1.46901
251	KIZ_KAN503-4_2.tif:0004-0141	1.488	401.697	0	1839	100.322	14.408	0.96	597.896	57041	1.299	0.77	0.928	2.2892
252	KIZ_KAN503-4_2.tif:0005-0189	0.87	87.12	0	245	79.214	19.364	0.798	75.794	7231	1.767	0.566	0.892	0.290199
253	KIZ_KAN503-4_2.tif:0006-0198	0.723	218.101	10	550	82.499	20.323	0.852	157.741	15049	1.633	0.612	0.945	0.603955
254	KIZ_KAN503-4_2.tif:0007-0219	0.671	221.219	19	651	84.284	22.417	0.9	148.402	14158	1.474	0.678	0.955	0.568197
255	KIZ_KAN503-4_2.tif:0008-0379	0.964	207.63	0	729	31.517	38.814	0.945	200.224	19102	1.114	0.898	0.934	0.766612
256	KIZ_KAN503-4_2.tif:0009-0425	1.583	237.364	0	903	116.156	43.545	0.942	375.691	35842	1.339	0.747	0.929	1.43843
257	KIZ_KAN503-4_2.tif:0010-0545	1.31	253.328	0	1222	16.87	55.779	0.925	331.919	31666	1.362	0.734	0.933	1.27084
258	KIZ_KAN503-4_2.tif:0011-0644	1.562	304.174	0	2213	93.304	65.917	0.811	475.059	45322	1.615	0.619	0.909	1.81889
259	KIZ_KAN503-4_2.tif:0012-0747	1.646	217.713	0	1689	132.113	76.414	0.815	358.28	34181	1.689	0.592	0.905	1.37177
260	KIZ_KAN503-4_2.tif:0013-0848	1.698	311.142	0	1895	97.881	86.827	0.913	528.338	50405	1.417	0.706	0.947	2.02288
261	KIZ_KAN503-4_2.tif:0014-0885	1.216	215.638	0	935	62.091	90.633	0.948	262.193	25014	1.284	0.779	0.932	1.00388
262	KIZ_KAN503-4_2.tif:0015-0935	1.593	272.48	0	1918	40.213	95.71	0.857	434.127	41417	1.446	0.691	0.921	1.66217
263	KIZ_KAN503-4_2.tif:0016-0957	0.901	95.977	0	236	77.492	98.019	0.927	86.517	8254	1.236	0.809	0.95	0.331254
264	KIZ_KAN503-4_2.tif:0017-1023	1.216	180.819	0	573	1.96	104.689	0.932	219.857	20975	1.2	0.833	0.959	0.841781
265	KIZ_KAN503-4_3.tif:0001-0046	1.405	382.948	0	1527	63.773	4.702	0.953	537.877	51315	1.216	0.822	0.931	2.0594
266	KIZ_KAN503-4_3.tif:0002-0156	1.163	476.64	0	2117	125.306	15.949	0.947	554.564	52907	1.256	0.796	0.961	2.12329
267	KIZ_KAN503-4_3.tif:0003-0197	1.562	220.919	0	1671	26.866	20.174	0.84	345.031	32917	1.701	0.588	0.925	1.32104
268	KIZ_KAN503-4_3.tif:0004-0391	1.75	249.401	0	1841	71.07	40.032	0.85	436.569	41650	1.594	0.627	0.915	1.67152
269	KIZ_KAN503-4_3.tif:0005-0463	1.53	258.041	0	1590	133.132	47.441	0.823	394.894	37674	1.614	0.619	0.904	1.51195
270	KIZ_KAN503-4_3.tif:0006-0534	1.352	216.194	0	1381	24.696	54.692	0.854	292.329	27889	1.396	0.716	0.935	1.11926
271	KIZ_KAN503-4_3.tif:0007-0572	1.405	217.858	0	1249	13.864	58.525	0.868	305.997	29193	1.439	0.695	0.908	1.17159
272	KIZ_KAN503-4_3.tif:0008-0674	1.405	191.172	0	1196	63.827	69.093	0.836	268.514	25617	1.431	0.699	0.884	1.02808
273	KIZ_KAN503-4_3.tif:0009-0688	1.352	191.465	0	977	95.624	70.488	0.858	258.891	24699	1.611	0.621	0.905	0.991234
274	KIZ_KAN503-4_3.tif:0010-0810	1.426	277.294	0	1840	106.589	82.975	0.93	395.292	37712	1.348	0.742	0.919	1.51348
275	KIZ_KAN503-4_3.tif:0011-0852	1.195	283.342	0	1577	36.074	87.266	0.932	338.575	32301	1.305	0.767	0.931	1.29632
276	KIZ_KAN503-4_3.tif:0012-0928	0.996	179.253	11	520	139.687	95.007	1	178.496	17029	1.104	0.905	0.945	0.683418
277	KIZ_KAN503-4_3.tif:0013-0959	1.31	208.232	0	1096	85.844	98.175	0.925	272.832	26029	1.221	0.819	0.923	1.04461
278	KIZ_KAN503-4_4.tif:0001-0067	1.572	240.013	0	1203	131.017	6.885	0.846	377.368	36002	1.641	0.609	0.917	1.44485
279	KIZ_KAN503-4_4.tif:0002-0285	1.467	158.071	0	649	50.292	29.16	0.861	231.964	22130	1.43	0.699	0.897	0.888134
280	KIZ_KAN503-4_4.tif:0003-0311	1.363	288.046	0	1056	71.446	31.785	0.935	392.504	37446	1.234	0.81	0.949	1.5028
281	KIZ_KAN503-4_4.tif:0004-0344	1.247	188.588	0	895	42.812	35.179	0.866	235.234	22442	1.492	0.67	0.93	0.900655
282	KIZ_KAN503-4_4.tif:0005-0381	1.3	423.04	0	1746	120.398	39.005	0.984	549.847	52457	1.124	0.889	0.954	2.10523
283	KIZ_KAN503-4_4.tif:0006-0428	0.996	188.463	0	553	99.43	43.88	0.944	187.667	17904	1.148	0.871	0.936	0.718534
284	KIZ_KAN503-4_4.tif:0007-0440	1.027	218.612	0	615	102.423	45.015	0.846	224.563	21424	1.26	0.793	0.899	0.8598
285	KIZ_KAN503-4_4.tif:0008-0618	1.268	239.496	0	1404	51.711	63.339	0.846	303.754	28979	1.37	0.73	0.906	1.163
286	KIZ_KAN503-4_4.tif:0009-0621	1.53	231.781	0	1481	18.377	63.656	0.853	354.706	33840	1.495	0.669	0.924	1.35809
287	KIZ_KAN503-4_4.tif:0010-0666	1.069	200.863	0	499	136.279	68.224	0.921	214.752	20488	1.33	0.752	0.976	0.822236
288	KIZ_KAN503-4_4.tif:0011-0786	1.048	162.33	0	483	36.934	80.47	0.891	170.152	16233	1.441	0.694	0.935	0.651472
289	KIZ_KAN503-4_4.tif:0012-0884	1.646	287.752	0	1785	113.511	90.485	0.855	473.539	45177	1.536	0.651	0.908	1.81307
290	KIZ_KAN503-4_5.tif:0001-0079	1.216	300.509	0	1297	78.1	8.14	0.96	365.387	34859	1.145	0.873	0.947	1.39898
291	KIZ_KAN503-4_5.tif:0002-0084	1.467	295.1	0	1276	109.243	8.615	0.942	433.048	41314	1.209	0.827	0.936	1.65804
292	KIZ_KAN503-4_5.tif:0003-0213	1.31	104.312	0	353	11.057	21.817	0.864	136.673	13039	1.428	0.7	0.899	0.523289
293	KIZ_KAN503-4_5.tif:0004-0241	1.09	150.356	0	447	7.488	24.635	0.927	163.905	15637	1.244	0.804	0.945	0.627553
294	KIZ_KAN503-4_5.tif:0005-0274	1.918	271.377	0	2261	131.937	28.114	0.918	520.55	49662	1.301	0.768	0.934	1.99306
295	KIZ_KAN503-4_5.tif:0006-0318	1.373	267.885	0	1425	50.691	32.636	0.942	367.84	35093	1.07	0.935	0.939	1.40837
296	KIZ_KAN503-4_5.tif:0007-0499	1.771	164.325	0	1485	74.745	51.104	0.75	291.092	27771	1.943	0.515	0.901	1.11452
297	KIZ_KAN503-4_5.tif:0008-0522	1.499	311.748	0	1837	118.315	53.503	0.962	467.281	44580	1.335	0.749	0.953	1.78911
298	KIZ_KAN503-4_5.tif:0009-0525	1.006	277.271	0	1049	31.831	53.807	0.986	279.006	26618	1.124	0.89	0.95	1.06825
299	KIZ_KAN503-4_5.tif:0010-0694	1.384	161.242	0	1155	5.237	71.038	0.733	223.096	21284	1.94	0.515	0.898	0.854182
300	KIZ_KAN503-4_5.tif:0011-0736	1.488	326.218	0	2270	139.284	75.295	0.851	485.551	46323	1.357	0.737	0.922	1.85906
301	KIZ_KAN503-4_5.tif:0012-0738	1.53	232.247	0	1632	101.732	75.657	0.897	355.419	33908	1.458	0.686	0.936	1.36082
302	KIZ_KAN503-4_5.tif:0013-0812	1.3	180.887	0	696	40.739	83.139	0.844	235.108	22430	1.635	0.612	0.936	0.900174
303	KIZ_KAN503-4_5.tif:0014-0862	1.635	235.071	0	1560	88.68	88.237	0.902	384.38	36671	1.388	0.721	0.94	1.4717
304	KIZ_KAN503-4_5.tif:0015-0935	1.038	239.283	0	959	114.801	95.75	0.91	248.305	23689	1.158	0.864	0.925	0.9507
305	KIZ_KAN503-4_5.tif:0016-0936	1.143	197.982	0	862	64.703	95.875	0.902	226.199	21580	1.054	0.948	0.92	0.866061
306	KIZ_KAN503-4_6.tif:0001-0037	1.688	261.286	0	1690	60.041	3.778	0.816	440.94	42067	1.754	0.57	0.899	1.68826
307	KIZ_KAN503-4_6.tif:0002-0109	1.509	249.035	0	1074	80.278	11.185	0.958	375.89	35861	1.327	0.754	0.935	1.43919
308	KIZ_KAN503-4_6.tif:0003-0169	1.709	172.638	0	1210	123.948	17.28	0.837	294.96	28140	1.549	0.646	0.893	1.12933
309	KIZ_KAN503-4_6.tif:0004-0220	0.933	74.989	0	226	21.02	22.546	0.818	69.956	6674	1.884	0.531	0.899	0.267845
310	KIZ_KAN503-4_6.tif:0005-0253	1.709	278.791	0	2148	110.844	25.933	0.887	476.327	45443	1.536	0.651	0.929	1.82374
311	KIZ_KAN503-4_6.tif:0006-0529	1.342	319.164	0	1473	137.26	54.225	0.885	428.215	40853	1.184	0.845	0.908	1.63954
312	KIZ_KAN503-4_6.tif:0007-0533	0.828	6.278	0	45	126.752	54.579	0.882	5.199	496	1.723	0.58	0.935	0.0199058
313	KIZ_KAN503-4_6.tif:0008-0624	1.373	238.626	0	1445	24.788	63.897	0.916	327.663	31260	1.472	0.679	0.953	1.25454
314	KIZ_KAN503-4_6.tif:0009-0692	1.604	228.595	0	1576	68.903	70.904	0.821	366.603	34975	1.69	0.592	0.916	1.40364
315	KIZ_KAN503-4_6.tif:0010-0696	1.499	293.252	0	1474	84.624	71.346	0.902	439.557	41935	1.47	0.68	0.938	1.68296
316	KIZ_KAN503-4_6.tif:0011-0735	1.216	179.276	0	1006	33.908	75.16	0.789	217.981	20796	1.568	0.638	0.882	0.834597
317	KIZ_KAN503-4_6.tif:0012-0783	1.509	222.438	0	1357	110.624	80.228	0.885	335.744	32031	1.206	0.829	0.929	1.28549
318	KIZ_KAN503-4_6.tif:0013-0931	1.153	287.327	0	1553	77.427	95.359	0.967	331.29	31606	1.1	0.909	0.928	1.26843
										31023.2				1.24504

## Sheet: RawData_Replicate3
	Label	Area	Mean	Min	Max	X	Y	Circ	IntDen	RawIntDen	AR	Round	Solidity
319	KIZ_KAN503-5_1.tif:0001-0019	1.593	328.796	0	2193	46.331	1.9	0.857	523.852	49977	1.393	0.718	0.93	1.43766
320	KIZ_KAN503-5_1.tif:0002-0051	1.761	399.036	0	3538	97.796	5.302	0.915	702.683	67038	1.083	0.923	0.931	1.92844
321	KIZ_KAN503-5_1.tif:0003-0124	1.677	195.019	0	1415	11.985	12.666	0.884	327.065	31203	1.38	0.725	0.909	0.897599
322	KIZ_KAN503-5_1.tif:0004-0142	1.75	208.072	0	974	104.718	14.501	0.808	364.224	34748	1.966	0.509	0.954	0.999575
323	KIZ_KAN503-5_1.tif:0005-0351	1.09	234.51	0	1413	18.395	35.965	0.944	255.642	24389	1.141	0.876	0.916	0.701584
324	KIZ_KAN503-5_1.tif:0006-0508	1.436	220.401	0	1484	11.012	52.052	0.864	316.5	30195	1.288	0.776	0.904	0.868602
325	KIZ_KAN503-5_1.tif:0007-0515	1.394	252.353	0	1241	57.204	52.757	0.909	351.803	33563	1.414	0.707	0.914	0.965487
326	KIZ_KAN503-5_1.tif:0008-0522	1.279	160.951	0	677	125.431	53.44	0.844	205.822	19636	1.517	0.659	0.878	0.564857
327	KIZ_KAN503-5_1.tif:0009-0682	1.52	182.269	0	1233	39.431	69.835	0.771	277.025	26429	1.613	0.62	0.873	0.760268
328	KIZ_KAN503-5_1.tif:0010-0694	1.363	272.977	0	1656	97.992	70.977	0.924	371.97	35487	1.179	0.848	0.929	1.02083
329	KIZ_KAN503-5_1.tif:0011-0876	1.279	289.615	0	1580	17.842	89.682	0.968	370.356	35333	1.032	0.969	0.946	1.0164
330	KIZ_KAN503-5_1.tif:0012-0956	1.53	359.438	0	2197	124.096	97.887	0.911	550.067	52478	1.339	0.747	0.924	1.5096
331	KIZ_KAN503-5_1.tif:0013-0972	1.247	255.412	0	1251	135.994	99.526	0.906	318.586	30394	1.082	0.924	0.908	0.874326
332	KIZ_KAN503-5_2.tif:0001-0239	1.237	375.898	0	1971	132.286	24.594	0.909	464.933	44356	1.355	0.738	0.959	1.27596
333	KIZ_KAN503-5_2.tif:0002-0260	1.467	216.864	0	1841	90.563	26.607	0.797	318.24	30361	1.692	0.591	0.9	0.873377
334	KIZ_KAN503-5_2.tif:0003-0272	2.054	185.5	0	1281	58.271	27.766	0.811	381.099	36358	1.661	0.602	0.905	1.04589
335	KIZ_KAN503-5_2.tif:0004-0359	1.195	222.833	0	723	13.147	36.775	0.943	266.271	25403	1.163	0.86	0.946	0.730753
336	KIZ_KAN503-5_2.tif:0005-0453	1.488	282.528	0	1815	77.594	46.388	0.945	420.522	40119	1.31	0.764	0.931	1.15408
337	KIZ_KAN503-5_2.tif:0006-0479	1.625	373.458	0	2512	123.262	49.029	0.919	606.753	57886	1.185	0.844	0.928	1.66517
338	KIZ_KAN503-5_2.tif:0007-0558	1.436	245.328	0	1819	18.899	57.164	0.897	352.295	33610	1.422	0.703	0.938	0.966839
339	KIZ_KAN503-5_2.tif:0008-0642	1.583	303.881	0	1785	65.369	65.811	0.882	480.971	45886	1.508	0.663	0.95	1.31998
340	KIZ_KAN503-5_2.tif:0009-0707	0.88	40.643	0	185	111.706	72.4	0.971	35.785	3414	1.135	0.881	0.939	0.0982085
341	KIZ_KAN503-5_2.tif:0010-0847	1.184	280.504	0	1531	40.762	86.762	0.908	332.243	31697	1.233	0.811	0.934	0.911809
342	KIZ_KAN503-5_2.tif:0011-0922	1.363	329.669	0	2039	111.926	94.388	0.951	449.221	42857	1.197	0.836	0.915	1.23284
343	KIZ_KAN503-5_3.tif:0001-0040	1.331	357.866	0	1176	85.628	4.145	0.967	476.39	45449	1.254	0.797	0.948	1.3074
344	KIZ_KAN503-5_3.tif:0002-0056	0.901	104.663	0	291	34.6	5.783	0.927	94.347	9001	1.286	0.778	0.95	0.258927
345	KIZ_KAN503-5_3.tif:0003-0137	1.677	245.831	0	1947	38.536	14.007	0.85	412.283	39333	1.519	0.658	0.914	1.13147
346	KIZ_KAN503-5_3.tif:0004-0166	1.593	193.013	0	1168	77.345	17.009	0.8	307.517	29338	1.719	0.582	0.869	0.843949
347	KIZ_KAN503-5_3.tif:0005-0293	1.625	223.458	0	1728	107.671	29.96	0.853	363.05	34636	1.61	0.621	0.934	0.996354
348	KIZ_KAN503-5_3.tif:0006-0358	1.363	242.669	0	1897	64.055	36.706	0.899	330.671	31547	1.37	0.73	0.922	0.907494
349	KIZ_KAN503-5_3.tif:0007-0360	1.226	155.957	0	761	29.667	36.916	0.832	191.262	18247	1.6	0.625	0.903	0.524901
350	KIZ_KAN503-5_3.tif:0008-0490	1.593	194.842	0	1441	2.241	50.233	0.69	310.431	29616	2.065	0.484	0.849	0.851946
351	KIZ_KAN503-5_3.tif:0009-0531	1.562	271.43	0	2220	141.683	54.411	0.828	423.918	40443	1.288	0.776	0.931	1.1634
352	KIZ_KAN503-5_3.tif:0010-0562	1.625	307.697	0	2323	82.672	57.485	0.832	499.911	47693	1.477	0.677	0.923	1.37196
353	KIZ_KAN503-5_3.tif:0011-0603	1.352	332.101	0	1931	124.393	61.801	0.917	449.053	42841	1.361	0.735	0.918	1.23238
354	KIZ_KAN503-5_3.tif:0012-0626	1.268	326.769	0	1872	29.912	64.209	0.932	414.442	39539	1.246	0.802	0.934	1.1374
355	KIZ_KAN503-5_3.tif:0013-0651	1.163	302.838	0	1303	12.747	66.649	0.976	352.348	33615	1.145	0.873	0.941	0.966983
356	KIZ_KAN503-5_3.tif:0014-0693	1.153	282.155	0	1395	71.46	70.93	0.938	325.325	31037	1.187	0.842	0.94	0.892823
357	KIZ_KAN503-5_3.tif:0015-0850	1.499	244.455	0	1515	22.352	87	0.857	366.414	34957	1.486	0.673	0.932	1.00559
358	KIZ_KAN503-5_3.tif:0016-0896	1.289	254.024	0	1349	90.569	91.793	0.936	327.506	31245	1.258	0.795	0.925	0.898807
359	KIZ_KAN503-5_3.tif:0017-0929	1.698	155.846	0	876	134.759	95.153	0.691	264.635	25247	2.404	0.416	0.831	0.726266
360	KIZ_KAN503-5_3.tif:0018-0977	1.604	341.641	0	2077	62.599	100.025	0.907	547.897	52271	1.383	0.723	0.927	1.50365
361	KIZ_KAN503-5_4.tif:0001-0009	1.143	455.046	0	2185	48.078	0.919	0.959	519.9	49600	1.159	0.863	0.936	1.42681
362	KIZ_KAN503-5_4.tif:0002-0061	1.541	379.789	0	3137	106.124	6.228	0.904	585.192	55829	1.12	0.893	0.925	1.606
363	KIZ_KAN503-5_4.tif:0003-0098	1.342	260.648	0	1928	1.412	10.067	0.9	349.706	33363	1.285	0.778	0.905	0.959734
364	KIZ_KAN503-5_4.tif:0004-0107	1.625	210.677	0	1622	10.022	11.071	0.736	342.285	32655	1.621	0.617	0.871	0.939367
365	KIZ_KAN503-5_4.tif:0005-0151	0.943	140.967	0	497	24.187	15.554	0.882	132.983	12687	1.54	0.65	0.896	0.36496
366	KIZ_KAN503-5_4.tif:0006-0195	0.954	10.527	0	65	108.089	19.995	0.935	10.042	958	1.316	0.76	0.938	0.0275582
367	KIZ_KAN503-5_4.tif:0007-0216	2.107	226.498	0	1456	124.052	22.089	0.868	477.197	45526	1.488	0.672	0.903	1.30962
368	KIZ_KAN503-5_4.tif:0008-0238	1.31	198.856	0	874	41.221	24.415	0.914	260.548	24857	1.299	0.77	0.919	0.715047
369	KIZ_KAN503-5_4.tif:0009-0325	2.054	263.862	0	2688	86.659	33.257	0.851	542.09	51717	1.28	0.781	0.925	1.48771
370	KIZ_KAN503-5_4.tif:0010-0372	2.086	241.548	0	2176	133.213	38.038	0.751	503.842	48068	1.812	0.552	0.85	1.38274
371	KIZ_KAN503-5_4.tif:0011-0435	0.985	127.17	0	330	121.308	44.578	0.966	125.3	11954	1.248	0.802	0.935	0.343874
372	KIZ_KAN503-5_4.tif:0012-0592	1.73	301.582	0	2740	80.235	60.515	0.809	521.588	49761	1.425	0.702	0.899	1.43145
373	KIZ_KAN503-5_4.tif:0013-0617	1.509	187.736	0	990	118.62	63.207	0.784	283.367	27034	1.652	0.605	0.865	0.777671
374	KIZ_KAN503-5_4.tif:0014-0623	1.813	11.728	0	59	9.276	63.75	0.901	21.268	2029	1.292	0.774	0.923	0.0583671
375	KIZ_KAN503-5_4.tif:0015-0634	1.09	293.548	0	1885	107.347	64.914	0.956	320.001	30529	1.06	0.943	0.95	0.87821
376	KIZ_KAN503-5_4.tif:0016-0748	1.656	280.886	0	1836	69.358	76.516	0.882	465.185	44380	1.384	0.723	0.916	1.27665
377	KIZ_KAN503-5_4.tif:0017-0819	1.457	248.381	0	1423	50.37	83.873	0.935	361.886	34525	1.245	0.803	0.939	0.993161
378	KIZ_KAN503-5_4.tif:0018-0855	2.547	176.872	0	2099	19.426	87.56	0.666	450.51	42980	2.385	0.419	0.857	1.23638
379	KIZ_KAN503-5_4.tif:0019-0989	1.625	197.361	0	1557	34.639	101.241	0.853	320.651	30591	1.477	0.677	0.917	0.879993
380	KIZ_KAN503-5_5.tif:0001-0061	1.614	312.461	0	2357	118.414	6.329	0.903	504.377	48119	1.207	0.829	0.917	1.38421
381	KIZ_KAN503-5_5.tif:0002-0080	1.677	269.462	0	2133	138.73	8.188	0.83	451.915	43114	1.596	0.627	0.904	1.24024
382	KIZ_KAN503-5_5.tif:0003-0113	1.027	5.01	0	28	127.505	11.562	0.821	5.147	491	1.815	0.551	0.942	0.0141243
383	KIZ_KAN503-5_5.tif:0004-0145	1.583	407.801	0	2458	98.425	14.89	0.873	645.452	61578	1.595	0.627	0.924	1.77138
384	KIZ_KAN503-5_5.tif:0005-0177	1.163	148.541	0	465	20.086	18.126	0.902	172.825	16488	1.237	0.808	0.965	0.474301
385	KIZ_KAN503-5_5.tif:0006-0323	1.457	163.683	0	616	120.906	33.159	0.877	238.483	22752	1.565	0.639	0.936	0.654494
386	KIZ_KAN503-5_5.tif:0007-0354	1.373	216.389	0	1358	65.53	36.271	0.868	297.129	28347	1.561	0.641	0.953	0.815442
387	KIZ_KAN503-5_5.tif:0008-0413	1.268	356.62	0	2191	33.551	42.292	0.91	452.303	43151	1.25	0.8	0.906	1.2413
388	KIZ_KAN503-5_5.tif:0009-0526	1.352	237.574	0	1449	8.94	53.924	0.917	321.238	30647	1.366	0.732	0.918	0.881604
389	KIZ_KAN503-5_5.tif:0010-0537	1.583	279.583	0	2162	97.333	54.982	0.822	442.513	42217	1.492	0.67	0.899	1.21443
390	KIZ_KAN503-5_5.tif:0011-0566	1.268	345.835	0	1817	47.231	57.949	0.977	438.624	41846	1.064	0.939	0.924	1.20376
391	KIZ_KAN503-5_5.tif:0012-0704	1.321	214.548	0	1275	112.709	72.11	0.943	283.356	27033	1.125	0.889	0.947	0.777643
392	KIZ_KAN503-5_5.tif:0013-0841	1.101	100.238	0	751	7.419	86.202	0.869	110.322	10525	1.492	0.67	0.95	0.302767
393	KIZ_KAN503-5_5.tif:0014-0843	1.583	201.358	0	1484	116.797	86.359	0.891	318.701	30405	1.337	0.748	0.968	0.874643
394	KIZ_KAN503-5_5.tif:0015-0864	1.384	283.174	0	1232	67.789	88.497	0.949	391.801	37379	1.239	0.807	0.95	1.07526
395	KIZ_KAN503-5_5.tif:0016-0978	1.373	371.557	0	1970	94.203	100.139	0.981	510.194	48674	1.05	0.952	0.963	1.40018
396	KIZ_KAN503-5_5.tif:0017-0990	1.457	354.899	0	2377	136.049	101.326	0.877	517.081	49331	1.133	0.882	0.914	1.41908
397	KIZ_KAN503-5_5.tif:0018-1016	1.153	240.364	0	1200	0.834	104.026	0.91	277.14	26440	1.136	0.88	0.936	0.760584
398	KIZ_KAN503-5_6.tif:0001-0172	1.457	543.273	0	2946	91.439	17.633	0.911	791.538	75515	1.331	0.751	0.946	2.1723
399	KIZ_KAN503-5_6.tif:0002-0303	1.499	309.364	0	2231	119.404	31.078	0.87	463.707	44239	1.389	0.72	0.914	1.2726
400	KIZ_KAN503-5_6.tif:0003-0318	1.436	241.197	0	1578	47.546	32.624	0.922	346.363	33044	1.485	0.674	0.942	0.950557
401	KIZ_KAN503-5_6.tif:0004-0390	1.226	191.154	0	945	15.641	39.923	0.956	234.427	22365	1.413	0.708	0.944	0.643361
402	KIZ_KAN503-5_6.tif:0005-0488	0.964	306.533	0	1384	63.082	49.966	0.914	295.599	28201	1.206	0.829	0.934	0.811242
403	KIZ_KAN503-5_6.tif:0006-0499	1.656	350.513	0	2552	122.584	51.08	0.869	580.496	55381	1.414	0.707	0.935	1.59311
404	KIZ_KAN503-5_6.tif:0007-0571	1.509	237.472	0	1611	3.017	58.517	0.919	358.438	34196	1.387	0.721	0.95	0.983696
405	KIZ_KAN503-5_6.tif:0008-0762	1.184	110.469	0	520	33.501	78.096	0.86	130.845	12483	1.682	0.595	0.897	0.359091
406	KIZ_KAN503-5_6.tif:0009-0834	1.478	307.277	0	1991	137.539	85.399	0.89	454.137	43326	1.412	0.708	0.925	1.24633
407	KIZ_KAN503-5_6.tif:0010-0868	2.254	156.088	0	1643	107.397	88.945	0.758	351.761	33559	1.988	0.503	0.879	0.965372
408	KIZ_KAN503-5_6.tif:0011-0884	1.363	214.246	0	1412	45.306	90.579	0.779	291.941	27852	1.792	0.558	0.881	0.801202
409	KIZ_KAN503-5_6.tif:0012-1019	1.195	322.789	0	2112	77.107	104.308	0.904	385.711	36798	1.348	0.742	0.927	1.05855
										34762.8				1
410	KIZ_KAN503-6_1.tif:0001-0127	1.331	279.543	0	2008	18.59	13.016	0.913	372.127	35502	1.131	0.885	0.924	1.02127
411	KIZ_KAN503-6_1.tif:0002-0236	1.488	312.803	0	2456	126.017	24.151	0.896	465.583	44418	1.141	0.877	0.916	1.27775
412	KIZ_KAN503-6_1.tif:0003-0301	1.593	240.5	0	1891	77.742	30.937	0.819	383.175	36556	1.763	0.567	0.886	1.05159
413	KIZ_KAN503-6_1.tif:0004-0384	1.541	190.163	0	1594	43.355	39.266	0.731	293.01	27954	2.105	0.475	0.847	0.804136
414	KIZ_KAN503-6_1.tif:0005-0571	1.813	197.272	0	1724	15.978	58.457	0.707	357.725	34128	2.114	0.473	0.852	0.98174
415	KIZ_KAN503-6_1.tif:0006-0593	1.488	199.092	0	1719	104.369	60.75	0.744	296.333	28271	2.019	0.495	0.885	0.813255
416	KIZ_KAN503-6_1.tif:0007-0722	1.184	123.504	0	488	137.913	73.996	0.702	146.285	13956	2.298	0.435	0.883	0.401464
417	KIZ_KAN503-6_1.tif:0008-0748	1.279	196.32	0	1295	80.986	76.622	0.94	251.051	23951	1.099	0.91	0.938	0.688984
418	KIZ_KAN503-6_1.tif:0009-0791	1.677	186.956	0	1453	109.418	80.926	0.688	313.544	29913	1.89	0.529	0.814	0.86049
419	KIZ_KAN503-6_1.tif:0010-0976	1.625	207.729	0	1660	41.084	99.886	0.743	337.495	32198	1.918	0.521	0.871	0.926221
420	KIZ_KAN503-6_2.tif:0001-0026	1.143	93.275	0	410	108.979	2.64	0.826	106.569	10167	1.945	0.514	0.956	0.292468
421	KIZ_KAN503-6_2.tif:0002-0069	1.373	264	0	1722	30.243	7.08	0.868	362.505	34584	1.117	0.895	0.929	0.994858
422	KIZ_KAN503-6_2.tif:0003-0162	1.048	85.46	0	266	65.008	16.572	0.728	89.578	8546	2.394	0.418	0.901	0.245838
423	KIZ_KAN503-6_2.tif:0004-0198	1.258	279.692	0	1801	24.979	20.238	0.914	351.803	33563	1.279	0.782	0.923	0.965487
424	KIZ_KAN503-6_2.tif:0005-0203	1.635	178.006	0	1416	118.28	20.697	0.717	291.071	27769	1.696	0.59	0.832	0.798815
425	KIZ_KAN503-6_2.tif:0006-0417	0.922	193.023	5	548	93.772	42.71	0.875	178.045	16986	1.448	0.691	0.921	0.488626
426	KIZ_KAN503-6_2.tif:0007-0430	0.891	438.541	0	1873	141.808	44.168	0.792	390.722	37276	1.559	0.642	0.904	1.0723
427	KIZ_KAN503-6_2.tif:0008-0536	1.237	229.059	0	867	134.655	54.956	0.964	283.314	27029	1.282	0.78	0.937	0.777527
428	KIZ_KAN503-6_2.tif:0009-0579	1.436	263.708	0	1773	26.423	59.329	0.897	378.689	36128	1.37	0.73	0.923	1.03927
429	KIZ_KAN503-6_2.tif:0010-0632	1.247	157.605	0	891	49.995	64.777	0.801	196.587	18755	1.774	0.564	0.872	0.539514
430	KIZ_KAN503-6_2.tif:0011-0639	1.478	272.901	0	2027	89.438	65.439	0.845	403.331	38479	1.531	0.653	0.91	1.1069
431	KIZ_KAN503-6_2.tif:0012-0880	1.289	251.154	0	1130	89.005	90.101	0.936	323.806	30892	1.286	0.777	0.921	0.888652
432	KIZ_KAN503-6_2.tif:0013-0892	1.478	240.922	0	1556	31.774	91.416	0.845	356.069	33970	1.512	0.661	0.916	0.977195
433	KIZ_KAN503-6_2.tif:0014-0926	1.237	259.22	0	1031	83.965	94.8	0.92	320.619	30588	1.259	0.794	0.959	0.879907
434	KIZ_KAN503-6_2.tif:0015-0957	1.153	187.673	0	1334	115.596	98.004	0.848	216.387	20644	1.484	0.674	0.905	0.593854
435	KIZ_KAN503-6_3.tif:0001-0099	1.289	416.976	0	2214	127.339	10.164	0.91	537.594	51288	1.078	0.928	0.914	1.47537
436	KIZ_KAN503-6_3.tif:0002-0115	1.593	269.796	0	1819	79.29	11.838	0.934	429.851	41009	1.186	0.843	0.947	1.17968
437	KIZ_KAN503-6_3.tif:0003-0203	1.163	311.387	0	1526	107.67	20.832	0.976	362.295	34564	1.119	0.893	0.941	0.994282
438	KIZ_KAN503-6_3.tif:0004-0208	1.897	269.309	0	1750	48.761	21.319	0.875	510.938	48745	1.275	0.784	0.943	1.40222
439	KIZ_KAN503-6_3.tif:0005-0223	1.614	303.214	0	2029	36.664	22.824	0.923	489.45	46695	1.336	0.748	0.945	1.34325
440	KIZ_KAN503-6_3.tif:0006-0370	1.373	266.397	0	1258	128.66	37.923	0.882	365.796	34898	1.3	0.769	0.91	1.00389
441	KIZ_KAN503-6_3.tif:0007-0409	1.143	345.257	0	1404	68.518	41.887	0.959	394.464	37633	1.3	0.769	0.936	1.08257
442	KIZ_KAN503-6_3.tif:0008-0412	1.174	178	0	786	18.366	42.138	0.853	208.966	19936	1.53	0.654	0.896	0.573487
443	KIZ_KAN503-6_3.tif:0009-0656	1.583	229.185	0	1473	136.566	67.175	0.895	362.746	34607	1.432	0.698	0.924	0.995519
444	KIZ_KAN503-6_3.tif:0010-0685	1.258	282.975	0	1733	38.633	70.103	0.853	355.932	33957	1.346	0.743	0.879	0.976821
445	KIZ_KAN503-6_3.tif:0011-0893	1.792	261.509	0	2303	133.082	91.528	0.819	468.728	44718	1.401	0.714	0.9	1.28638
446	KIZ_KAN503-6_4.tif:0001-0035	1.426	242.265	0	950	93.156	3.587	0.849	345.356	32948	1.625	0.615	0.895	0.947796
447	KIZ_KAN503-6_4.tif:0002-0150	1.017	263.928	12	807	90.283	15.377	0.921	268.346	25601	1.017	0.984	0.924	0.736449
448	KIZ_KAN503-6_4.tif:0003-0161	1.31	546.216	0	3078	25.293	16.482	0.952	715.67	68277	1.065	0.939	0.926	1.96408
449	KIZ_KAN503-6_4.tif:0004-0184	1.174	439.696	0	1867	128.586	18.87	0.927	516.19	49246	1.237	0.809	0.941	1.41663
450	KIZ_KAN503-6_4.tif:0005-0537	1.08	418.34	0	2089	26.6	55.013	0.947	451.653	43089	1.176	0.851	0.941	1.23952
451	KIZ_KAN503-6_4.tif:0006-0575	1.153	227.555	0	1011	140.703	58.872	0.883	262.371	25031	1.594	0.627	0.944	0.720052
452	KIZ_KAN503-6_4.tif:0007-0592	1.205	203.157	0	1126	64.792	60.647	0.876	244.888	23363	1.366	0.732	0.898	0.67207
453	KIZ_KAN503-6_4.tif:0008-0655	1.415	303.815	0	1323	72.391	67.068	0.908	429.913	41015	1.414	0.707	0.941	1.17985
454	KIZ_KAN503-6_4.tif:0009-0781	1.426	355.074	0	2639	119.105	79.968	0.93	506.169	48290	1.357	0.737	0.922	1.38913
455	KIZ_KAN503-6_4.tif:0010-0896	1.205	276.635	0	963	46.488	91.708	0.969	333.459	31813	1.131	0.885	0.935	0.915146
456	KIZ_KAN503-6_4.tif:0011-0910	1.384	373.515	0	2378	130.258	93.189	0.898	516.798	49304	1.35	0.741	0.94	1.4183
457	KIZ_KAN503-6_4.tif:0012-0993	1.216	334.414	0	1449	8.085	101.647	0.977	406.612	38792	1.04	0.962	0.932	1.11591
458	KIZ_KAN503-6_5.tif:0001-0008	1.205	257.965	0	1392	104.998	0.787	0.924	310.955	29666	1.26	0.793	0.954	0.853385
459	KIZ_KAN503-6_5.tif:0002-0180	1.499	266.105	0	1977	51.413	18.528	0.87	398.866	38053	1.512	0.662	0.917	1.09465
460	KIZ_KAN503-6_5.tif:0003-0211	1.614	282.273	0	2039	111.938	21.574	0.859	455.646	43470	1.511	0.662	0.909	1.25048
461	KIZ_KAN503-6_5.tif:0004-0286	1.405	283.604	0	1664	46.124	29.303	0.902	398.342	38003	1.43	0.699	0.924	1.09321
462	KIZ_KAN503-6_5.tif:0005-0293	1.174	325.964	0	1006	68.109	30.046	0.985	382.672	36508	1.103	0.907	0.941	1.0502
463	KIZ_KAN503-6_5.tif:0006-0333	1.122	275.168	0	1346	128.306	34.149	0.941	308.617	29443	1.331	0.751	0.93	0.84697
464	KIZ_KAN503-6_5.tif:0007-0386	1.174	329.777	0	1783	64.871	39.518	0.943	387.147	36935	1.061	0.943	0.922	1.06249
465	KIZ_KAN503-6_5.tif:0008-0397	1.205	272.6	0	789	91.606	40.677	0.94	328.596	31349	1.229	0.813	0.924	0.901798
466	KIZ_KAN503-6_5.tif:0009-0560	1.226	402.385	0	2703	117.179	57.378	0.901	493.475	47079	1.255	0.797	0.918	1.35429
467	KIZ_KAN503-6_5.tif:0010-0583	0.954	284.934	4	1330	7.38	59.743	0.967	271.784	25929	1.109	0.902	0.924	0.745884
468	KIZ_KAN503-6_5.tif:0011-0585	1.048	211.01	0	832	40.41	59.956	0.838	221.178	21101	1.619	0.618	0.939	0.607
469	KIZ_KAN503-6_5.tif:0012-0777	1.845	7.705	0	59	119.351	79.62	0.817	14.213	1356	1.544	0.648	0.917	0.0390073
470	KIZ_KAN503-6_5.tif:0013-0825	1.509	275.597	0	2207	45.874	84.453	0.854	415.983	39686	1.511	0.662	0.903	1.14162
471	KIZ_KAN503-6_5.tif:0014-0847	1.405	273.94	0	1788	89.346	86.724	0.916	384.768	36708	1.187	0.842	0.905	1.05596
472	KIZ_KAN503-6_5.tif:0015-0875	1.226	318.513	0	1736	131.819	89.564	0.876	390.617	37266	1.455	0.687	0.932	1.07201
473	KIZ_KAN503-6_5.tif:0016-0907	1.321	242.151	0	1446	133.684	92.878	0.959	319.812	30511	1.188	0.842	0.926	0.877692
474	KIZ_KAN503-6_6.tif:0001-0020	1.205	184.757	0	1250	130.832	2.027	0.876	222.708	21247	1.181	0.847	0.906	0.6112
475	KIZ_KAN503-6_6.tif:0002-0064	1.782	232.518	0	1836	73.499	6.556	0.833	414.327	39528	1.392	0.719	0.897	1.13708
476	KIZ_KAN503-6_6.tif:0003-0174	0.629	183.033	23	388	59.441	17.806	0.843	115.112	10982	1.685	0.593	0.93	0.315913
477	KIZ_KAN503-6_6.tif:0004-0197	1.478	187.603	0	1192	9.461	20.289	0.913	277.266	26452	1.348	0.742	0.934	0.760929
478	KIZ_KAN503-6_6.tif:0005-0213	1.939	281.351	0	2144	110.692	21.83	0.824	545.581	52050	1.655	0.604	0.879	1.49729
479	KIZ_KAN503-6_6.tif:0006-0333	1.384	123.841	0	603	135.147	34.073	0.811	171.347	16347	1.748	0.572	0.904	0.470245
480	KIZ_KAN503-6_6.tif:0007-0376	1.614	238.448	0	1421	89.107	38.549	0.868	384.904	36721	1.564	0.639	0.922	1.05633
481	KIZ_KAN503-6_6.tif:0008-0407	1.562	169.362	0	1100	23.266	41.735	0.8	264.51	25235	1.882	0.531	0.92	0.725921
482	KIZ_KAN503-6_6.tif:0009-0437	1.541	112.259	0	506	114.105	44.679	0.82	172.972	16502	1.59	0.629	0.902	0.474703
483	KIZ_KAN503-6_6.tif:0010-0456	1.289	237.138	0	1261	48.809	46.786	0.885	305.735	29168	1.285	0.778	0.928	0.839059
484	KIZ_KAN503-6_6.tif:0011-0610	1.415	178.8	0	1178	15.005	62.406	0.875	253.011	24138	1.451	0.689	0.918	0.694364
485	KIZ_KAN503-6_6.tif:0012-0625	1.52	260.862	0	969	135.81	63.976	0.939	396.476	37825	1.317	0.759	0.932	1.08809
486	KIZ_KAN503-6_6.tif:0013-0731	1.373	268.16	0	1259	84.443	74.894	0.906	368.217	35129	1.098	0.911	0.907	1.01054
487	KIZ_KAN503-6_6.tif:0014-0743	1.174	225.5	0	998	1.585	76.089	0.889	264.73	25256	1.458	0.686	0.926	0.726525
488	KIZ_KAN503-6_6.tif:0015-0749	1.74	194.578	0	1379	52.88	76.741	0.849	338.564	32300	1.646	0.607	0.951	0.929155
489	KIZ_KAN503-6_6.tif:0016-0965	1.761	245.161	0	2580	136.692	98.763	0.797	431.716	41187	1.521	0.658	0.868	1.1848
490	KIZ_KAN503-6_6.tif:0017-0967	1.656	215.778	0	1302	112.592	98.992	0.793	357.358	34093	1.797	0.557	0.888	0.980733
										32645.2				0.939087
491	KIZ_KAN503-7_1.tif:0001-0146	1.478	238.007	0	1619	103.715	14.935	0.803	351.761	33559	1.859	0.538	0.925	0.965372
492	KIZ_KAN503-7_1.tif:0002-0205	1.268	172.818	0	810	118.889	21.03	0.948	219.186	20911	1.326	0.754	0.924	0.601535
493	KIZ_KAN503-7_1.tif:0003-0217	1.143	304.844	0	1331	40.042	22.261	0.959	348.291	33228	1.217	0.821	0.932	0.955851
494	KIZ_KAN503-7_1.tif:0004-0245	1.541	297.429	0	1505	130.922	25.156	0.85	458.288	43722	1.59	0.629	0.919	1.25773
495	KIZ_KAN503-7_1.tif:0005-0296	1.174	257.696	0	765	76.087	30.378	0.899	302.527	28862	1.573	0.636	0.957	0.830256
496	KIZ_KAN503-7_1.tif:0006-0346	0.86	148.988	0	516	8.712	35.45	0.884	128.057	12217	1.233	0.811	0.916	0.351439
497	KIZ_KAN503-7_1.tif:0007-0496	1.132	206.63	0	648	46.576	50.805	0.98	233.913	22316	1.33	0.752	0.947	0.641951
498	KIZ_KAN503-7_1.tif:0008-0611	1.101	269.657	0	845	125.36	62.581	0.997	296.783	28314	1.079	0.927	0.95	0.814492
499	KIZ_KAN503-7_1.tif:0009-0677	1.101	280.324	0	1045	92.065	69.402	0.88	308.523	29434	1.445	0.692	0.955	0.846711
500	KIZ_KAN503-7_1.tif:0010-0724	1.352	210.45	0	1230	50.125	74.175	0.882	284.562	27148	1.411	0.709	0.896	0.780951
501	KIZ_KAN503-7_1.tif:0011-0813	1.184	208.15	0	1330	29.435	83.266	0.886	246.544	23521	1.407	0.711	0.89	0.676615
502	KIZ_KAN503-7_1.tif:0012-0861	1.31	317.552	0	1428	140.265	88.186	0.899	416.067	39694	1.255	0.797	0.923	1.14185
503	KIZ_KAN503-7_1.tif:0013-0868	1.143	254.881	0	1146	125.025	88.867	0.93	291.207	27782	1.116	0.896	0.94	0.799189
504	KIZ_KAN503-7_1.tif:0014-0938	1.237	148.424	0	831	73.05	96.067	0.888	183.579	17514	1.534	0.652	0.891	0.503815
505	KIZ_KAN503-7_1.tif:0015-0996	1.111	241.934	0	805	34.299	101.963	0.975	268.807	25645	1.219	0.82	0.951	0.737715
506	KIZ_KAN503-7_2.tif:0001-0070	1.426	275.066	0	1436	33.644	7.234	0.891	392.116	37409	1.352	0.739	0.932	1.07612
507	KIZ_KAN503-7_2.tif:0002-0127	1.08	330.563	0	1819	53.298	12.991	0.89	356.886	34048	1.22	0.82	0.924	0.979439
508	KIZ_KAN503-7_2.tif:0003-0245	0.681	111.554	0	262	117.972	25.06	0.973	76.004	7251	1.302	0.768	0.922	0.208585
509	KIZ_KAN503-7_2.tif:0004-0249	1.205	245.8	0	1300	89.168	25.473	0.969	296.291	28267	1.105	0.905	0.92	0.81314
510	KIZ_KAN503-7_2.tif:0005-0256	1.111	263.443	0	1033	135.439	26.248	0.962	292.706	27925	1.205	0.83	0.926	0.803302
511	KIZ_KAN503-7_2.tif:0006-0337	1.184	182.531	0	1047	48.425	34.572	0.964	216.199	20626	1.223	0.818	0.938	0.593336
512	KIZ_KAN503-7_2.tif:0007-0529	0.964	130.685	0	450	112.248	54.231	0.873	126.023	12023	1.42	0.704	0.906	0.345859
513	KIZ_KAN503-7_2.tif:0008-0533	1.205	252.713	0	1549	19.922	54.573	0.861	304.624	29062	1.583	0.632	0.916	0.83601
514	KIZ_KAN503-7_2.tif:0009-0576	0.849	104.877	0	263	84.96	58.988	0.936	89.043	8495	1.027	0.974	0.91	0.244371
515	KIZ_KAN503-7_2.tif:0010-0739	1.09	208.029	0	1086	41.162	75.649	0.927	226.775	21635	1.271	0.787	0.937	0.622361
516	KIZ_KAN503-7_2.tif:0011-0826	1.3	262.387	0	1580	89.645	84.544	0.867	341.038	32536	1.483	0.674	0.929	0.935944
517	KIZ_KAN503-7_2.tif:0012-0827	1.593	278.77	0	1750	128.508	84.666	0.828	444.148	42373	1.767	0.566	0.907	1.21892
518	KIZ_KAN503-7_2.tif:0013-0980	1.289	179.732	0	914	40.312	100.336	0.925	231.722	22107	1.398	0.715	0.901	0.635939
519	KIZ_KAN503-7_3.tif:0001-0074	1.363	287.408	0	1581	63.379	7.589	0.899	391.634	37363	1.414	0.707	0.919	1.0748
520	KIZ_KAN503-7_3.tif:0002-0105	1.509	224.181	0	1146	21.554	10.749	0.895	338.375	32282	1.422	0.703	0.95	0.928637
521	KIZ_KAN503-7_3.tif:0003-0125	1.698	319.154	0	2615	114.653	12.888	0.759	541.944	51703	1.783	0.561	0.873	1.48731
522	KIZ_KAN503-7_3.tif:0004-0220	1.53	245.164	0	1608	98.684	22.559	0.723	375.188	35794	2.034	0.492	0.898	1.02967
523	KIZ_KAN503-7_3.tif:0005-0247	1.111	70.321	0	268	136.17	25.369	0.831	78.132	7454	1.737	0.576	0.883	0.214425
524	KIZ_KAN503-7_3.tif:0006-0284	1.08	256.049	0	1335	29.942	29.102	0.918	276.438	26373	1.231	0.812	0.941	0.758657
525	KIZ_KAN503-7_3.tif:0007-0448	0.975	88.075	0	260	11.276	45.972	0.658	85.857	8191	1.83	0.546	0.827	0.235626
526	KIZ_KAN503-7_3.tif:0008-0495	1.562	161.215	0	875	99.62	50.715	0.828	251.785	24021	1.501	0.666	0.928	0.690998
527	KIZ_KAN503-7_3.tif:0009-0596	1.226	210.761	0	1366	113.525	61.039	0.917	258.472	24659	1.127	0.887	0.932	0.709351
528	KIZ_KAN503-7_3.tif:0010-0640	1.279	185.361	0	856	19.909	65.578	0.94	237.037	22614	1.223	0.818	0.953	0.650524
529	KIZ_KAN503-7_3.tif:0011-0729	1.446	235.174	0	1847	86.05	74.59	0.848	340.178	32454	1.377	0.726	0.905	0.933585
530	KIZ_KAN503-7_3.tif:0012-0915	1.373	249.618	0	1300	46.188	93.62	0.858	342.757	32700	1.199	0.834	0.91	0.940662
531	KIZ_KAN503-7_4.tif:0001-0051	1.604	175.66	0	1079	107.358	5.257	0.833	281.71	26876	1.66	0.602	0.911	0.773126
532	KIZ_KAN503-7_4.tif:0002-0105	1.216	269.983	0	1426	46.45	10.81	0.96	328.271	31318	1.097	0.911	0.951	0.900907
533	KIZ_KAN503-7_4.tif:0003-0124	1.677	331.031	0	2048	11.152	12.753	0.893	555.172	52965	1.186	0.843	0.922	1.52361
534	KIZ_KAN503-7_4.tif:0004-0245	1.53	198.993	0	1240	116.888	25.146	0.832	304.529	29053	1.63	0.614	0.939	0.835751
535	KIZ_KAN503-7_4.tif:0005-0352	1.541	162.592	0	613	91.583	36.053	0.781	250.527	23901	1.977	0.506	0.91	0.687546
536	KIZ_KAN503-7_4.tif:0006-0426	0.849	277.728	19	1164	48.404	43.595	0.971	235.8	22496	1.047	0.955	0.92	0.647129
537	KIZ_KAN503-7_4.tif:0007-0430	1.3	226.032	0	1406	4.083	44.096	0.821	293.786	28028	1.524	0.656	0.912	0.806265
538	KIZ_KAN503-7_4.tif:0008-0444	0.797	148.079	0	445	45.274	45.545	0.819	117.963	11254	1.425	0.702	0.879	0.323737
539	KIZ_KAN503-7_4.tif:0009-0484	1.929	10.082	0	61	76.652	49.565	0.802	19.444	1855	1.247	0.802	0.878	0.0533617
540	KIZ_KAN503-7_4.tif:0010-0484	1.562	265.208	0	1555	138.511	49.548	0.965	414.201	39516	1.072	0.932	0.937	1.13673
541	KIZ_KAN503-7_4.tif:0011-0780	1.279	349.393	0	1430	121.744	79.831	0.94	446.8	42626	1.126	0.888	0.946	1.2262
542	KIZ_KAN503-7_4.tif:0012-0903	1.3	200.758	0	1092	39.306	92.451	0.882	260.935	24894	1.338	0.748	0.895	0.716111
543	KIZ_KAN503-7_4.tif:0013-0945	1.331	191.37	0	685	74.539	96.806	0.94	254.751	24304	1.303	0.768	0.937	0.699139
544	KIZ_KAN503-7_4.tif:0014-0980	1.31	182.744	0	806	102.984	100.364	0.899	239.437	22843	1.441	0.694	0.929	0.657111
545	KIZ_KAN503-7_5.tif:0001-0027	1.52	322.228	0	2052	76.302	2.719	0.838	489.744	46723	1.646	0.608	0.927	1.34405
546	KIZ_KAN503-7_5.tif:0002-0032	1.048	349.53	0	1530	133.562	3.314	0.981	366.372	34953	1.154	0.866	0.935	1.00547
547	KIZ_KAN503-7_5.tif:0003-0115	1.247	260.109	0	1017	19.584	11.83	0.973	324.445	30953	1.351	0.74	0.944	0.890407
548	KIZ_KAN503-7_5.tif:0004-0227	1.373	281.382	0	1097	65.127	23.253	0.958	386.372	36861	1.221	0.819	0.923	1.06036
549	KIZ_KAN503-7_5.tif:0005-0299	1.646	253.191	0	1184	88.679	30.608	0.864	416.664	39751	1.514	0.661	0.935	1.14349
550	KIZ_KAN503-7_5.tif:0006-0314	0.922	282.08	0	1015	108.909	32.185	0.982	260.191	24823	1.225	0.817	0.962	0.714069
551	KIZ_KAN503-7_5.tif:0007-0421	1.111	189.425	0	1217	22.394	43.09	0.877	210.465	20079	1.429	0.7	0.926	0.577601
552	KIZ_KAN503-7_5.tif:0008-0500	0.807	116.532	0	403	64.459	51.24	0.89	94.054	8973	1.546	0.647	0.911	0.258121
553	KIZ_KAN503-7_5.tif:0009-0630	0.996	251.326	0	1023	32.892	64.422	0.873	250.265	23876	1.248	0.802	0.931	0.686827
554	KIZ_KAN503-7_5.tif:0010-0867	1.331	213.528	0	1478	69.63	88.759	0.878	284.247	27118	1.486	0.673	0.898	0.780088
555	KIZ_KAN503-7_5.tif:0011-0909	1.048	254.63	0	611	116.97	93.032	0.932	266.9	25463	1.122	0.891	0.962	0.732479
556	KIZ_KAN503-7_5.tif:0012-0990	1.258	233.142	0	1484	45.004	101.371	0.941	293.251	27977	1.338	0.747	0.92	0.804798
557	KIZ_KAN503-7_6.tif:0001-0093	1.656	323.791	0	2481	92.787	9.518	0.767	536.241	51159	1.749	0.572	0.866	1.47166
558	KIZ_KAN503-7_6.tif:0002-0171	1.163	201.288	0	586	140.375	17.519	0.976	234.196	22343	1.12	0.893	0.953	0.642728
559	KIZ_KAN503-7_6.tif:0003-0211	0.975	292.226	0	1393	11.49	21.621	0.937	284.865	27177	1.054	0.949	0.969	0.781785
560	KIZ_KAN503-7_6.tif:0004-0239	1.321	364.746	0	1992	121.217	24.522	0.932	481.725	45958	1.341	0.746	0.937	1.32205
561	KIZ_KAN503-7_6.tif:0005-0305	1.3	199.202	0	867	64.622	31.272	0.944	258.912	24701	1.335	0.749	0.929	0.710559
562	KIZ_KAN503-7_6.tif:0006-0466	1.614	228.955	0	1374	29.726	47.629	0.847	369.58	35259	1.518	0.659	0.922	1.01428
563	KIZ_KAN503-7_6.tif:0007-0477	1.289	149.789	0	723	37.783	48.931	0.851	193.118	18424	1.454	0.688	0.911	0.529992
564	KIZ_KAN503-7_6.tif:0008-0663	1.174	183.339	0	890	6.089	67.976	0.943	215.234	20534	1.33	0.752	0.937	0.59069
565	KIZ_KAN503-7_6.tif:0009-0665	1.593	235.118	0	1748	88.081	68.122	0.828	374.601	35738	1.739	0.575	0.902	1.02805
566	KIZ_KAN503-7_6.tif:0010-0741	1.143	300.872	0	1283	93.242	75.849	0.913	343.753	32795	1.201	0.832	0.96	0.943395
567	KIZ_KAN503-7_6.tif:0011-0884	1.541	251.102	0	1557	114.233	90.568	0.841	386.906	36912	1.599	0.625	0.891	1.06183
568	KIZ_KAN503-7_6.tif:0012-0915	0.901	157.198	3	438	75.468	93.661	0.96	141.704	13519	1.11	0.901	0.94	0.388893
569	KIZ_KAN503-7_6.tif:0013-0981	1.174	199.696	0	568	23.372	100.387	0.889	234.437	22366	1.186	0.844	0.911	0.64339
										27716.4				0.797302

## Sheet: IF condition
Exp. number	Cell line	Gene induced	Culture condition, fixation condition	rabbit-Alexa488	mouse IgG1-Alexa568	mouse IgG2b-Alexa647	Nuclear stain	Date	Replicate
KAN500-1	RPE-BFP-Cas9 pMCB306 (pool)		Serum starved for 24 hours. Fixed in 100% methanol at -20C for 5 minutes.	Kizuna antivody, Proteintech, 21177-1-AP, 1:1000	CEP170, Invitrogen, 41-3200, 1:1000	Ac-Tub, 6B-11, SIGMA, 1:2000	DAPI	2019-05-29	No.1	Kizuna: -7, D8
KAN500-2	RPE-BFP-Cas9 CEP89KO (pool)		Serum starved for 24 hours. Fixed in 100% methanol at -20C for 5 minutes.	Kizuna antivody, Proteintech, 21177-1-AP, 1:1000	CEP170, Invitrogen, 41-3200, 1:1000	Ac-Tub, 6B-11, SIGMA, 1:2000	DAPI	2019-05-29	No.1
KAN500-3	RPE-BFP-Cas9 NCS1KO (pool)		Serum starved for 24 hours. Fixed in 100% methanol at -20C for 5 minutes.	Kizuna antivody, Proteintech, 21177-1-AP, 1:1000	CEP170, Invitrogen, 41-3200, 1:1000	Ac-Tub, 6B-11, SIGMA, 1:2000	DAPI	2019-05-29	No.1
KAN500-4	RPE-BFP-Cas9 C3orf14KO (pool)		Serum starved for 24 hours. Fixed in 100% methanol at -20C for 5 minutes.	Kizuna antivody, Proteintech, 21177-1-AP, 1:1000	CEP170, Invitrogen, 41-3200, 1:1000	Ac-Tub, 6B-11, SIGMA, 1:2000	DAPI	2019-05-29	No.1
KAN503-1	RPE-BFP-Cas9 pMCB306 (pool)		Serum starved for 24 hours. Fixed in 100% methanol at -20C for 5 minutes.	Kizuna antivody, Proteintech, 21177-1-AP, 1:1000	CEP170, Invitrogen, 41-3200, 1:1000	Ac-Tub, 6B-11, SIGMA, 1:2000	DAPI	2019-05-31	No.2
KAN503-2	RPE-BFP-Cas9 CEP89KO (pool)		Serum starved for 24 hours. Fixed in 100% methanol at -20C for 5 minutes.	Kizuna antivody, Proteintech, 21177-1-AP, 1:1000	CEP170, Invitrogen, 41-3200, 1:1000	Ac-Tub, 6B-11, SIGMA, 1:2000	DAPI	2019-05-31	No.2
KAN503-3	RPE-BFP-Cas9 NCS1KO (pool)		Serum starved for 24 hours. Fixed in 100% methanol at -20C for 5 minutes.	Kizuna antivody, Proteintech, 21177-1-AP, 1:1000	CEP170, Invitrogen, 41-3200, 1:1000	Ac-Tub, 6B-11, SIGMA, 1:2000	DAPI	2019-05-31	No.2
KAN503-4	RPE-BFP-Cas9 C3orf14KO (pool)		Serum starved for 24 hours. Fixed in 100% methanol at -20C for 5 minutes.	Kizuna antivody, Proteintech, 21177-1-AP, 1:1000	CEP170, Invitrogen, 41-3200, 1:1000	Ac-Tub, 6B-11, SIGMA, 1:2000	DAPI	2019-05-31	No.2
KAN503-5	RPE-BFP-Cas9 pMCB306 (pool)		Serum starved for 24 hours. Fixed in 100% methanol at -20C for 5 minutes.	Kizuna antivody, Proteintech, 21177-1-AP, 1:1000	CEP170, Invitrogen, 41-3200, 1:1000	Ac-Tub, 6B-11, SIGMA, 1:2000	DAPI	2019-05-31	No.4
KAN503-6	RPE-BFP-Cas9 CEP89KO (pool)		Serum starved for 24 hours. Fixed in 100% methanol at -20C for 5 minutes.	Kizuna antivody, Proteintech, 21177-1-AP, 1:1000	CEP170, Invitrogen, 41-3200, 1:1000	Ac-Tub, 6B-11, SIGMA, 1:2000	DAPI	2019-05-31	No.4
KAN503-7	RPE-BFP-Cas9 NCS1KO (pool)		Serum starved for 24 hours. Fixed in 100% methanol at -20C for 5 minutes.	Kizuna antivody, Proteintech, 21177-1-AP, 1:1000	CEP170, Invitrogen, 41-3200, 1:1000	Ac-Tub, 6B-11, SIGMA, 1:2000	DAPI	2019-05-31	No.4

## Sheet: After ROUT
sgGFP			CEP89 KO			NCS1 KO			C3ORF14 KO
	0.379293	1.43766		1.9549	1.02127		0.243845	0.965372		2.12341
0.964092	1.56718	1.92844	0.936053	2.3071	1.27775	1.63093	1.86901	0.601535	0.384799	1.28232
1.56197	0.773756	0.897599	1.5227	0.664716	1.05159	1.54199	1.59138	0.955851	0.922732	0.785435
1.18941	1.00059	0.999575	1.77232	1.26863	0.804136	0.930408	1.54767	1.25773	1.54846	1.20398
1.14698	1.73642	0.701584	1.09781	0.620771	0.98174	0.818063	0.586016	0.830256	1.18865	1.71559
0.937893	0.755656	0.868602	1.28552	1.1697	0.813255	0.274231	1.21533	0.351439	0.513129	1.37105
1.28324	1.21469	0.965487	1.34077	1.81728	0.401464	1.18815	1.37514	0.641951	1.16791	1.26157
0.962125	0.725998	0.564857	1.33208	1.09502	0.688984	1.01034	0.843506	0.814492	1.00126	1.36559
0.311785	0.771268	0.760268	0.501647	1.16272	0.86049	1.8402	0.804899	0.846711	1.8584	1.53054
1.05392	1.24146	1.02083	1.04871	1.31462	0.926221	0.940684	1.13816	0.780951	0.0258182	0.900896
1.60403	0.995689	1.0164	0.948994	1.42198	0.292468	1.70445	0.777007	0.676615	1.15687	1.12078
1.14641	1.64744	1.5096	1.67076	0.455505	0.994858	0.462064	0.672582	1.14185	0.996634	1.32401
1.14222	1.24359	0.874326	1.16023	0.701678	0.245838		1.17099	0.799189	0.883592	1.01475
0.420831	0.983368	1.27596	2.21802	0.695096	0.965487	0.995302	0.926501	0.503815	0.905858	1.46901
1.32567	0.993442	0.873377	1.79059	1.2712	0.798815	1.07853	1.08366	0.737715	1.30772	2.2892
0.790723	0.931437	1.04589	1.33804	1.11544	0.488626	1.04852	0.813487	1.07612	1.01497	0.290199
0.950961	0.749235	0.730753	0.788502	1.25611	1.0723	0.756277	0.933363	0.979439	0.560896	0.603955
0.964409	1.49474	1.15408	1.94544	0.870475	0.777527	0.506215	0.642322	0.208585	1.96504	0.568197
1.04034	1.19563	1.66517	1.00355	1.38919	1.03927	0.171212	0.679204	0.81314	1.73655	0.766612
1.42324	1.28232	0.966839	0.802458	2.1001	0.539514	1.13619	0.909003	0.803302	1.03057	1.43843
1.31394	0.706373	1.31998	1.09591	1.35078	1.1069	0.218281	0.667926	0.593336	0.890951	1.27084
1.16753	0.959931	0.0982086	1.18688	1.27321	0.888652	1.83119	2.44303	0.345859	0.0427555	1.81889
1.31058	0.512533	0.911809	0.799223	0.545161	0.977195	0.200456	1.47981	0.83601	0.918799	1.37177
1.03419	0.784431	1.23284	0.927109	1.49277	0.879907	0.814448	1.2053	0.244371	0.770043	2.02288
1.10771	0.976104	1.3074	1.47709	0.288553	0.593854	0.912455	0.86578	0.622361	0.851113	1.00388
1.33449	0.66307	0.258927	1.69867	1.56962	1.47537	1.15059	0.203031	0.935944	1.74809	1.66217
1.05734	0.857272	1.13147	1.18808	0.697624	1.17968	1.22862	1.597	1.21892	1.78279	0.331254
0.836079	0.553428	0.843949	1.83436	0.0617239	0.994282	1.29802	1.01563	0.635939	1.10187	0.841781
0.722276	1.05344	0.996354	1.78615	1.28055	1.40222	0.00970562	0.904949	1.0748	0.899895	2.0594
1.00329	1.00516	0.907494	1.97316	0.432509	1.34325	0.231539	0.686427	0.928637	1.40287	2.12329
1.05239	0.611259	0.524901	1.33842	0.0345541	1.00389	1.34115	0.738319	1.48731	0.360884	1.32104
0.60048	1.16208	0.851946	1.37915	1.80484	1.08257	1.38486	0.851934	1.02967	1.96123	1.67152
0.851494	1.18837	1.1634	1.03634	0.49945	0.573487	1.15719	1.37811	0.214425	1.05487	1.51195
0.876361	1.1506	1.37196	1.2486	1.60414	0.995519	1.1726	1.09377	0.758657	1.29821	1.11926
0.796242	0.889739	1.23238	0.889111	1.84361	0.976821	1.01509	1.50967	0.235626	1.22912	1.17159
1.26611	0.946767	1.1374	0.756277	1.30981	1.28638	0.933516	0.718012	0.690998	1.68643	1.02808
1.04117	0.677077	0.966983	0.337603	1.26783	0.947796	1.74746	1.55775	0.709351	1.12338	0.991234
0.674255	0.783508	0.892823	0.938274	0.78708	0.736449	1.50919	1.19334	0.650524	1.27353	1.51348
0.945315	0.509001	1.00559	0.7722	1.35463	1.96408	0.935673	1.04164	0.933585	0.749299	1.29632
1.29567	1.3493	0.898807	1.25107	1.31844	1.41663	1.24226	1.28982	0.940662	0.648564	0.683418
1.47931	0.275751	0.726266	1.62357	0.695979	1.23952	1.00583	1.5087	0.773126	0.900593	1.04461
0.866021	0.851894	1.50365	1.93643	0.8962	0.720052	0.892156	1.44802	0.900907	0.831702	1.44485
0.896723	1.69937	1.42681	1.07764	1.07218	0.67207	0.730078	0.720018	1.52361	1.00951	0.888134
0.771058	1.17356	1.606	1.42489	0.872723	1.17985	0.642982	0.995488	0.835751	1.31058	1.5028
0.980141	0.711189	0.959734	1.06686	0.83239	1.38913	0.583289	1.04252	0.687546	1.86164	0.900655
0.754374	0.560893	0.939367	1.49352	1.34617	0.915146	0.557978	0.757422	0.647129	0.997966	2.10523
0.70388	0.739202	0.36496	0.876043	1.56027	1.4183	1.17489	0.925658	0.806265	1.60764	0.718534
0.847117	2.14818	0.0275582	0.978238	1.48743	1.11591	1.04104	1.80476	0.323737	0.689036	0.8598
0.453436	0.590832	1.30962	1.37122	1.69179	0.853385	1.68929	0.897605	0.0533617	1.63093	1.163
1.1551	0.848082	0.715047	1.02112	0.872723	1.09465	0.810451	1.42727	1.13673	1.95204	1.35809
0.585699	0.0285343	1.48771	1.00621	1.03715	1.25048	1.0654	1.1022	1.2262	0.760337	0.822236
	1.37855	1.38274	1.02797	0.955677	1.09321	1.20635	1.04168	0.716111	0.282732	0.651472
	1.64078	0.343874	0.914168	1.08956	1.0502	0.921717	1.22673	0.699139	1.26116	1.81307
	1.004	1.43145	0.981536	0.849085	0.84697	0.721768	0.699671	0.657111	1.11659	1.39898
	1.27509	0.777671	1.41569	0.8356	1.06249	0.931549	1.00893	1.34405	0.815082	1.65804
	1.86661	0.0583671	1.85986	1.05653	0.901798	1.3723	1.05428	1.00547	0.852065	0.523289
	1.05376	0.87821	1.52131	0.444348	1.35429	1.00862	0.896401	0.890407	1.6792	0.627553
	1.01756	1.27665	1.17368	0.362678	0.745884	1.1563	0.788003	1.06036	0.821616	1.99306
	0.87497	0.993161	1.64444	0.040253	0.607	1.32726	0.746867	1.14349	1.13759	1.40837
	1.23857	1.23638	0.664359	1.00805	0.0390073	0.967708	0.929109	0.714069	1.81102	1.11452
		0.879993	1.17381	1.20526	1.14162	1.18003	0.677438	0.577601	0.545862	1.78911
		1.38421	1.34128	1.02727	1.05596	0.747333	0.5147	0.258121	0.898055	1.06825
		1.24024	0.500569	0.695297	1.07201	1.51674	0.485403	0.686827	1.4894	0.854182
		0.0141243	0.958065	0.90515	0.877692	1.41131	0.985335	0.780088	1.79465	1.85906
		1.77138	1.23001	2.10873	0.6112	0.681487	1.1864	0.732479	1.24321	1.36082
		0.474301	1.16093	2.17097	1.13708	1.43872	0.931999	0.804798	1.04015	0.900174
		0.654494	1.24828	0.985214	0.315913	1.5378	0.79005	1.47166	0.592043	1.4717
		0.815442	1.84496	1.74541	0.760929	1.00012	0.863492	0.642728	0.481729	0.9507
		1.2413	1.55943	1.7503	1.49729	1.06908	0.301315	0.781785	0.658079	0.866061
		0.881604	1.05417	1.35648	0.470245	0.0152245	0.487169	1.32205	0.976398	1.68826
		1.21443	1.46771	1.82134	1.05633	0.478811	0.900615	0.710559	0.763699	1.43919
		1.20376	1.28514	1.20418	0.725921	1.13581	0.0753288	1.01428	0.934467	1.12933
		0.777643	1.14273	0.68426	0.474703	0.108855	1.6165	0.529992	1.08957	0.267845
		0.302767	0.794021	1.02362	0.839059	0.881055	0.273383	0.59069	0.845912	1.82374
		0.874643	1.47399	1.05272	0.694364	1.66448	0.806303	1.02805	0.958953	1.63954
		1.07526	1.03609	0.479063	1.08809	0.500886	1.12066	0.943395	0.327771	0.0199058
		1.40018	0.926919	1.22099	1.01054	1.5163	1.10569	1.06183	1.36621	1.25454
		1.41908	0.724306	1.57577	0.726525	0.955274	1.40857	0.388893	1.57656	1.40364
		0.760584	0.909664	1.34492	0.929155	1.16366	0.842503	0.64339	1.77137	1.68296
		2.1723	1.19747	1.65928	1.1848		1.23837		1.21682	0.834597
		1.2726	1.06051	1.80845	0.980733		0.400684		1.72697	1.28549
		0.950557		0.168958			1.69259		1.10746	1.26843
		0.643361		0.865017			0.912414		1.57212
		0.811242		0.863934			1.61032		0.590584
		1.59311		1.21204			1.18901		1.11494
		0.983696		1.22589					0.827008
		0.359091		1.2828					1.02981
		1.24633		1.15285					0.970752
		0.965372		1.01503					1.0293
		0.801202		1.39938
		1.05855		1.83221

## Sheet: Statistics
Table Analyzed	Identify outliers of Data 1:Cleaned data						Compare column means (main column effect)
Data sets analyzed	A-D
							Number of families	1
Nested one-way ANOVA							Number of comparisons per family	3
P value	0.1734						Alpha	0.05
P value summary	ns
Significantly different (P < 0.05)?	No						Dunnett's multiple comparisons test	Mean Diff.	95.00% CI of diff.	Below threshold?	Summary	Adjusted P Value
F, DFn, Dfd	2.221, 3, 7						sgGFP vs. CEP89 KO	-0.09825	-0.3651 to 0.1686	No	ns	0.5863
							sgGFP vs. NCS1 KO	0.06384	-0.2035 to 0.3312	No	ns	0.819
Random effects	SD	Variance					sgGFP vs. C3ORF14 KO	-0.1666	-0.4640 to 0.1308	No	ns	0.2991
Variation within subcolumns	0.4056	0.1645
Variation among subcolumn means	0.09944	0.009889					Test details	Mean 1	Mean 2	Mean Diff.	SE of diff.	N1	N2	q	DF
							sgGFP vs. CEP89 KO	1	1.098	-0.09825	0.09005	201	252	1.091	7
Do the subcolumns differ (within each column)?							sgGFP vs. NCS1 KO	1	0.9362	0.06384	0.09021	201	241	0.7077	7
Chi-square, df	21.03, 1						sgGFP vs. C3ORF14 KO	1	1.167	-0.1666	0.1004	201	170	1.66	7
P value	<0.0001
P value summary	****
Is there significant difference between subcolumns (P < 0.05)?	Yes
Data analyzed
Number of treatments (columns)	4
Number of subjects (subcolumns)	11
Total number of values	864
