# Supplementary material for: Myristoylated Neuronal Calcium Sensor-1 captures the preciliary vesicle at distal appendages
Source: eLife. 2025 Jan 30;14:e85998. doi: 10.7554/eLife.85998 (PMC11984960; doi:10.7554/eLife.85998)
Supplement: Figure 2—figure supplement 4—source data 3. [file elife-85998-fig2-figsupp4-data3.xlsx]

## Sheet: Raw Data
	Label	Area	Mean	Min	Max	X	Y	Circ	IntDen	RawIntDen	AR	Round	Solidity
1	ANKRD26_KAN497-31_1.tif:0001-0057	0.933	771.562	0	3423	117.445	5.829	0.993	719.779	68669	1.069	0.935	0.957	1.35629
2	ANKRD26_KAN497-31_1.tif:0002-0064	0.996	813.442	0	3581	84.062	6.626	0.914	810.007	77277	1.304	0.767	0.945	1.5263
3	ANKRD26_KAN497-31_1.tif:0003-0238	0.776	492.568	0	1569	130.024	24.375	0.948	382.064	36450	1.287	0.777	0.967	0.719926
4	ANKRD26_KAN497-31_1.tif:0004-0261	0.975	891.914	0	3344	116.765	26.703	0.924	869.449	82948	1.364	0.733	0.944	1.63831
5	ANKRD26_KAN497-31_1.tif:0005-0415	0.713	466.5	93	905	84.004	42.488	0.994	332.506	31722	1.122	0.891	0.971	0.626543
6	ANKRD26_KAN497-31_1.tif:0006-0457	0.88	678.679	0	2399	28.268	46.791	0.971	597.56	57009	1.283	0.78	0.944	1.12599
7	ANKRD26_KAN497-31_1.tif:0007-0638	0.755	674.208	0	1669	49.117	65.373	0.996	508.821	48543	1.029	0.972	0.954	0.958776
8	ANKRD26_KAN497-31_1.tif:0008-0644	0.755	671.167	0	2371	15.971	65.94	0.958	506.525	48324	1.295	0.772	0.96	0.95445
9	ANKRD26_KAN497-31_1.tif:0009-0686	0.755	625.139	0	2170	6.309	70.269	0.958	471.788	45010	1.023	0.978	0.947	0.888995
10	ANKRD26_KAN497-31_1.tif:0010-0759	0.639	662.328	0	2200	54.385	77.758	0.929	423.488	40402	1.407	0.71	0.938	0.797982
11	ANKRD26_KAN497-31_1.tif:0011-0821	0.797	699.763	9	2260	137.38	84.059	0.959	557.446	53182	1.171	0.854	0.938	1.0504
12	ANKRD26_KAN497-31_1.tif:0012-0950	0.776	638.797	0	2426	102.404	97.313	1	495.488	47271	1.15	0.87	0.931	0.933652
13	ANKRD26_KAN497-31_2.tif:0001-0009	1.268	1059.94	0	2367	123.881	0.872	0.846	1344.33	128253	1.389	0.72	0.913	2.53313
14	ANKRD26_KAN497-31_2.tif:0002-0031	0.692	649.515	0	2074	111.096	3.217	0.928	449.336	42868	1.451	0.689	0.978	0.846688
15	ANKRD26_KAN497-31_2.tif:0003-0049	0.839	849.812	0	3599	37.477	5.047	0.939	712.609	67985	1.169	0.856	0.947	1.34278
16	ANKRD26_KAN497-31_2.tif:0004-0095	0.755	558.25	33	1690	11.572	9.716	0.958	421.308	40194	1.328	0.753	0.96	0.793874
17	ANKRD26_KAN497-31_2.tif:0005-0259	0.901	959.186	0	3767	96.367	26.587	0.994	864.649	82490	1.204	0.83	0.956	1.62926
18	ANKRD26_KAN497-31_2.tif:0006-0295	0.985	832.277	0	3285	79.107	30.263	0.966	820.038	78234	1.212	0.825	0.949	1.5452
19	ANKRD26_KAN497-31_2.tif:0007-0336	0.692	770.985	0	2772	23.791	34.431	0.949	533.369	50885	1.32	0.757	0.923	1.00503
20	ANKRD26_KAN497-31_2.tif:0008-0392	0.88	549.56	0	2388	44.798	40.113	0.951	483.874	46163	1.14	0.877	0.971	0.911768
21	ANKRD26_KAN497-31_2.tif:0009-0521	0.786	617.453	0	2409	8.437	53.341	0.946	485.404	46309	1.475	0.678	0.943	0.914652
22	ANKRD26_KAN497-31_2.tif:0010-0560	0.765	576.055	18	1939	77.556	57.363	0.936	440.783	42052	1.046	0.956	0.948	0.830572
23	ANKRD26_KAN497-31_2.tif:0011-0640	1.027	619.592	0	1622	136.989	65.535	0.961	636.458	60720	1.221	0.819	0.925	1.19928
24	ANKRD26_KAN497-31_2.tif:0012-0710	0.776	721.5	0	2617	28.151	72.738	0.969	559.637	53391	1.342	0.745	0.937	1.05453
25	ANKRD26_KAN497-31_2.tif:0013-0884	0.639	830.049	25	2684	66.292	90.556	0.945	530.728	50633	1.298	0.77	0.984	1.00006
26	ANKRD26_KAN497-31_2.tif:0014-0910	0.797	642.513	0	1661	118.203	93.212	0.974	511.84	48831	1.027	0.973	0.968	0.964464
27	ANKRD26_KAN497-31_3.tif:0001-0062	0.839	354.625	0	1056	74.349	6.36	0.834	297.37	28370	1.709	0.585	0.914	0.560338
28	ANKRD26_KAN497-31_3.tif:0002-0121	1.08	545.437	0	2356	115.648	12.422	0.947	588.871	56180	1.101	0.908	0.932	1.10961
29	ANKRD26_KAN497-31_3.tif:0003-0226	0.66	368.349	0	2129	141.863	23.158	0.921	243.242	23206	1.388	0.721	0.955	0.458343
30	ANKRD26_KAN497-31_3.tif:0004-0382	0.692	518.97	0	1749	67.146	39.117	0.928	359.025	34252	1.099	0.91	0.964	0.676513
31	ANKRD26_KAN497-31_3.tif:0005-0494	1.247	576.429	0	2124	108.655	50.586	0.917	719.003	68595	1.373	0.728	0.941	1.35482
32	ANKRD26_KAN497-31_3.tif:0006-0547	0.786	396.04	0	1243	17.941	56.033	0.82	311.343	29703	1.794	0.557	0.943	0.586666
33	ANKRD26_KAN497-31_3.tif:0007-0682	0.786	386.16	0	1265	29.029	69.863	0.926	303.576	28962	1.11	0.901	0.962	0.57203
34	ANKRD26_KAN497-31_3.tif:0008-0717	0.901	511.244	0	2057	72.281	73.449	0.884	460.856	43967	1.633	0.612	0.925	0.868395
35	ANKRD26_KAN497-31_3.tif:0009-0834	0.933	459.067	0	2007	79.729	85.364	0.885	428.257	40857	1.634	0.612	0.937	0.806969
36	ANKRD26_KAN497-31_3.tif:0010-0910	0.797	361.882	0	1201	105.027	93.21	0.879	288.283	27503	1.432	0.698	0.905	0.543213
37	ANKRD26_KAN497-31_3.tif:0011-0968	0.933	449.551	0	1985	58.056	99.101	0.927	419.379	40010	1.509	0.663	0.973	0.79024
38	ANKRD26_KAN497-31_4.tif:0001-0122	0.901	341.047	0	1161	97.838	12.495	0.827	307.433	29330	1.849	0.541	0.915	0.579299
39	ANKRD26_KAN497-31_4.tif:0002-0139	1.048	672.2	0	3733	46.181	14.2	0.891	704.591	67220	1.314	0.761	0.922	1.32767
40	ANKRD26_KAN497-31_4.tif:0003-0473	0.692	258.045	0	808	40.364	48.428	0.878	178.517	17031	1.342	0.745	0.917	0.33638
41	ANKRD26_KAN497-31_4.tif:0004-0496	1.059	622.436	0	3454	86.906	50.802	0.888	658.953	62866	1.532	0.653	0.902	1.24167
42	ANKRD26_KAN497-31_4.tif:0005-0513	1.279	636.926	0	3127	128.02	52.562	0.853	814.493	77705	1.49	0.671	0.917	1.53476
43	ANKRD26_KAN497-31_4.tif:0006-0527	1.153	572.027	0	1913	20.553	54.012	0.899	659.55	62923	1.332	0.751	0.913	1.2428
44	ANKRD26_KAN497-31_4.tif:0007-0590	0.901	533.372	0	2185	1.248	60.414	0.896	480.803	45870	1.502	0.666	0.95	0.905981
45	ANKRD26_KAN497-31_4.tif:0008-0672	1.122	716.757	0	2503	103.941	68.826	0.924	803.885	76693	1.282	0.78	0.96	1.51477
46	ANKRD26_KAN497-31_4.tif:0009-0756	0.65	242.371	0	827	65.914	77.418	0.872	157.511	15027	1.451	0.689	0.939	0.296799
47	ANKRD26_KAN497-31_4.tif:0010-0997	0.891	375.059	0	1860	34.691	102.121	0.873	334.162	31880	1.53	0.654	0.899	0.629664
48	ANKRD26_KAN497-31_4.tif:0011-1032	0.839	445.525	0	1307	141.737	105.72	0.906	373.594	35642	1.144	0.874	0.947	0.703967
49	ANKRD26_KAN497-31_5.tif:0001-0028	1.163	474.802	0	2311	80.391	2.866	0.907	552.425	52703	1.444	0.693	0.917	1.04094
50	ANKRD26_KAN497-31_5.tif:0002-0104	1.342	583.609	0	3224	127.722	10.669	0.885	783.016	74702	1.527	0.655	0.908	1.47544
51	ANKRD26_KAN497-31_5.tif:0003-0214	1.08	439.291	0	1852	54.369	21.948	0.878	474.273	45247	1.679	0.595	0.92	0.893676
52	ANKRD26_KAN497-31_5.tif:0004-0336	1.111	562.651	0	2715	107.276	34.405	0.877	625.149	59641	1.396	0.716	0.918	1.17797
53	ANKRD26_KAN497-31_5.tif:0005-0354	0.996	527.863	0	2316	82.17	36.283	0.846	525.634	50147	1.716	0.583	0.918	0.990456
54	ANKRD26_KAN497-31_5.tif:0006-0543	0.88	287.619	0	1004	105.569	55.611	0.835	253.242	24160	1.531	0.653	0.889	0.477186
55	ANKRD26_KAN497-31_5.tif:0007-0586	1.163	550.333	0	2737	68.907	60.064	0.918	640.305	61087	1.272	0.786	0.933	1.20653
56	ANKRD26_KAN497-31_5.tif:0008-0678	0.901	571.151	0	2667	2.332	69.411	0.884	514.858	49119	1.706	0.586	0.93	0.970152
57	ANKRD26_KAN497-31_5.tif:0009-0773	0.933	570.225	0	2195	68.707	79.146	0.959	531.954	50750	1.081	0.925	0.952	1.00237
58	ANKRD26_KAN497-31_5.tif:0010-0822	0.713	405.279	0	1242	18.304	84.192	0.905	288.87	27559	1.676	0.597	0.958	0.544319
59	ANKRD26_KAN497-31_5.tif:0011-0869	1.048	560.51	0	2800	129.955	88.974	0.864	587.519	56051	1.746	0.573	0.962	1.10707
60	ANKRD26_KAN497-31_6.tif:0001-0098	0.88	572.667	0	2382	44.419	10.025	0.937	504.219	48104	1.565	0.639	0.944	0.950105
61	ANKRD26_KAN497-31_6.tif:0002-0183	0.88	772.631	0	2972	61.867	18.798	0.846	680.283	64901	1.819	0.55	0.966	1.28186
62	ANKRD26_KAN497-31_6.tif:0003-0666	0.975	583.978	0	1890	54.454	68.24	0.956	569.27	54310	1.364	0.733	0.944	1.07268
63	ANKRD26_KAN497-31_6.tif:0004-0698	0.912	858.529	0	3740	136.245	71.487	0.971	782.911	74692	1.051	0.951	0.941	1.47525
64	ANKRD26_KAN497-31_6.tif:0005-0725	0.86	547.61	0	2306	105.752	74.217	0.915	470.677	44904	1.558	0.642	0.932	0.886902
65	ANKRD26_KAN497-31_6.tif:0006-0897	0.86	746.366	0	3418	87.27	91.843	0.928	641.511	61202	1.438	0.695	0.97	1.2088
66	ANKRD26_KAN497-31_6.tif:0007-0953	0.744	319.817	2	1143	2.315	97.599	0.864	238.012	22707	1.593	0.628	0.899	0.448487
										50630.2				1
67	ANKRD26_KAN497-32_1.tif:0001-0108	0.807	617.286	0	2389	9.046	11.037	0.89	498.213	47531	1.565	0.639	0.911	0.938788
68	ANKRD26_KAN497-32_1.tif:0002-0113	0.901	428.384	0	1698	135.576	11.632	0.914	386.162	36841	1.438	0.696	0.905	0.727649
69	ANKRD26_KAN497-32_1.tif:0003-0120	1.132	683.796	0	3750	86.186	12.324	0.883	774.085	73850	1.342	0.745	0.896	1.45862
70	ANKRD26_KAN497-32_1.tif:0004-0364	1.09	610.279	0	2496	111.153	37.255	0.887	665.273	63469	1.516	0.659	0.92	1.25358
71	ANKRD26_KAN497-32_1.tif:0005-0385	0.975	514.581	0	2822	60.47	39.436	0.924	501.62	47856	1.195	0.837	0.935	0.945207
72	ANKRD26_KAN497-32_1.tif:0006-0385	0.713	617.456	0	2363	17.183	39.444	0.905	440.102	41987	1.086	0.921	0.919	0.829288
73	ANKRD26_KAN497-32_1.tif:0007-0597	0.818	614.487	0	2435	40.561	61.148	0.801	502.396	47930	1.898	0.527	0.897	0.946668
74	ANKRD26_KAN497-32_1.tif:0008-0816	0.776	422.23	0	1337	46.81	83.606	0.868	327.506	31245	1.794	0.557	0.961	0.617122
75	ANKRD26_KAN497-32_1.tif:0009-0890	0.692	351.773	16	1012	116.084	91.167	0.878	243.357	23217	1.678	0.596	0.93	0.45856
76	ANKRD26_KAN497-32_1.tif:0010-0988	1.195	587.535	0	1967	94.971	101.156	0.916	702.064	66979	1.301	0.769	0.946	1.32291
77	ANKRD26_KAN497-32_2.tif:0001-0034	0.849	626.074	0	3082	10.354	3.463	0.936	531.556	50712	1.247	0.802	0.92	1.00162
78	ANKRD26_KAN497-32_2.tif:0002-0084	0.629	374.117	0	967	138.286	8.595	0.877	235.286	22447	1.373	0.728	0.909	0.443352
79	ANKRD26_KAN497-32_2.tif:0003-0113	1.226	773.94	0	3727	112.506	11.567	0.842	949.143	90551	1.498	0.668	0.9	1.78848
80	ANKRD26_KAN497-32_2.tif:0004-0192	0.912	797.253	0	3738	52.49	19.659	0.925	727.032	69361	1.44	0.694	0.93	1.36995
81	ANKRD26_KAN497-32_2.tif:0005-0291	1.258	852.817	0	3505	84.067	29.847	0.888	1072.69	102338	1.405	0.712	0.916	2.02128
82	ANKRD26_KAN497-32_2.tif:0006-0485	0.996	670.158	0	2481	33.323	49.635	0.976	667.328	63665	1.194	0.838	0.95	1.25745
83	ANKRD26_KAN497-32_2.tif:0007-0550	0.839	796.05	0	3782	80.677	56.317	0.925	667.527	63684	1.458	0.686	0.936	1.25783
84	ANKRD26_KAN497-32_2.tif:0008-0607	0.975	656.688	0	2967	54.784	62.198	0.866	640.148	61072	1.4	0.714	0.925	1.20624
85	ANKRD26_KAN497-32_2.tif:0009-0657	0.839	585.612	0	2546	131.824	67.315	0.925	491.065	46849	1.464	0.683	0.925	0.925317
86	ANKRD26_KAN497-32_2.tif:0010-0708	0.744	614.31	0	1794	40.991	72.492	0.945	457.177	43616	1.242	0.805	0.947	0.861462
87	ANKRD26_KAN497-32_2.tif:0011-0763	0.88	653.452	0	3159	14.421	78.168	0.906	575.349	54890	1.233	0.811	0.933	1.08414
88	ANKRD26_KAN497-32_2.tif:0012-0862	0.922	542.17	0	2084	106.966	88.237	0.904	500.1	47711	1.191	0.84	0.907	0.942343
89	ANKRD26_KAN497-32_2.tif:0013-0968	0.891	629.529	0	2480	79.331	99.17	0.949	560.884	53510	1.269	0.788	0.944	1.05688
90	ANKRD26_KAN497-32_3.tif:0001-0185	0.975	705.43	0	2981	32.824	18.967	0.924	687.662	65605	1.099	0.91	0.935	1.29577
91	ANKRD26_KAN497-32_3.tif:0002-0198	0.734	638.5	0	2347	2.596	20.288	0.932	468.487	44695	1.242	0.805	0.946	0.882774
92	ANKRD26_KAN497-32_3.tif:0003-0217	1.048	821.17	0	3750	111.573	22.209	0.88	860.739	82117	1.532	0.653	0.901	1.6219
93	ANKRD26_KAN497-32_3.tif:0004-0264	0.671	436.25	11	1128	4.529	27.104	0.9	292.654	27920	1.434	0.697	0.962	0.55145
94	ANKRD26_KAN497-32_3.tif:0005-0284	0.849	432.877	0	1643	66.256	29.121	0.861	367.525	35063	1.512	0.662	0.895	0.692531
95	ANKRD26_KAN497-32_3.tif:0006-0338	0.744	399.155	0	1115	118.445	34.636	0.93	297.056	28340	1.532	0.653	0.934	0.559745
96	ANKRD26_KAN497-32_3.tif:0007-0455	0.88	777.143	0	3439	87.983	46.637	0.863	684.256	65280	1.652	0.605	0.918	1.28935
97	ANKRD26_KAN497-32_3.tif:0008-0552	0.818	501.551	0	2114	54.412	56.551	0.935	410.061	39121	1.32	0.758	0.902	0.772681
98	ANKRD26_KAN497-32_3.tif:0009-0601	0.818	662.474	0	2920	27.657	61.581	0.915	541.629	51673	1.209	0.827	0.934	1.0206
99	ANKRD26_KAN497-32_3.tif:0010-0630	0.713	569.985	0	2278	16.136	64.491	0.956	406.266	38759	1.189	0.841	0.978	0.765531
100	ANKRD26_KAN497-32_3.tif:0011-0694	0.849	650.296	0	2599	89.095	71.109	0.985	552.121	52674	1.117	0.895	0.959	1.04037
101	ANKRD26_KAN497-32_3.tif:0012-0717	0.954	646.901	0	2888	108.823	73.446	0.905	617.046	58868	1.43	0.699	0.929	1.16271
102	ANKRD26_KAN497-32_3.tif:0013-0789	0.629	297.217	14	728	96.571	80.83	0.877	186.923	17833	1.527	0.655	0.93	0.352221
103	ANKRD26_KAN497-32_3.tif:0014-0935	1.111	661.189	0	2570	83.735	95.76	0.904	734.632	70086	1.35	0.741	0.926	1.38427
104	ANKRD26_KAN497-32_3.tif:0015-0982	0.702	397.403	0	1359	65.263	100.58	0.859	279.09	26626	1.702	0.588	0.931	0.525892
105	ANKRD26_KAN497-32_4.tif:0001-0091	0.629	453.483	0	1854	140.731	9.38	0.704	285.201	27209	2.21	0.452	0.857	0.537407
106	ANKRD26_KAN497-32_4.tif:0002-0096	1.195	818.404	0	3715	54.644	9.847	0.843	977.936	93298	1.574	0.635	0.908	1.84273
107	ANKRD26_KAN497-32_4.tif:0003-0196	0.65	28.548	0	86	59.559	20.07	1	18.553	1770	1.115	0.897	0.939	0.0349594
108	ANKRD26_KAN497-32_4.tif:0004-0210	0.912	735.655	0	2544	32.233	21.588	0.81	670.86	64002	1.332	0.751	0.906	1.26411
109	ANKRD26_KAN497-32_4.tif:0005-0260	2.39	428.842	0	2033	135.446	26.675	0.744	1024.87	97776	1.332	0.751	0.87	1.93118
110	ANKRD26_KAN497-32_4.tif:0006-0342	0.88	691.512	0	2692	86.147	35.019	0.937	608.86	58087	1.093	0.915	0.933	1.14728
111	ANKRD26_KAN497-32_4.tif:0007-0473	0.839	417.163	0	1349	108.497	48.451	0.875	349.811	33373	1.486	0.673	0.964	0.659152
112	ANKRD26_KAN497-32_4.tif:0008-0536	0.933	558.101	0	2138	42.834	54.937	0.885	520.644	49671	1.552	0.644	0.927	0.981055
113	ANKRD26_KAN497-32_4.tif:0009-0579	0.922	712.932	0	3536	69.25	59.3	0.858	657.611	62738	1.538	0.65	0.962	1.23914
114	ANKRD26_KAN497-32_4.tif:0010-0668	1.143	656.495	0	3704	112.34	68.467	0.875	750.061	71558	1.671	0.598	0.956	1.41335
115	ANKRD26_KAN497-32_4.tif:0011-0777	1.111	631.028	0	2575	100.33	79.576	0.932	701.121	66889	1.323	0.756	0.93	1.32113
116	ANKRD26_KAN497-32_4.tif:0012-0853	0.933	654.854	0	2475	45.519	87.342	0.915	610.904	58282	1.423	0.703	0.927	1.15113
117	ANKRD26_KAN497-32_4.tif:0013-0856	0.933	562.438	0	2228	14.865	87.643	0.959	524.69	50057	1.065	0.939	0.952	0.988679
118	ANKRD26_KAN497-32_4.tif:0014-1000	0.807	528.714	0	1528	21.543	102.447	0.937	426.727	40711	1.14	0.877	0.939	0.804085
119	ANKRD26_KAN497-32_5.tif:0001-0134	0.671	542.641	0	1587	125.253	13.719	0.974	364.024	34729	1.253	0.798	0.955	0.685935
120	ANKRD26_KAN497-32_5.tif:0002-0179	0.776	907	0	3746	58.562	18.344	0.985	703.521	67118	1.264	0.791	0.967	1.32565
121	ANKRD26_KAN497-32_5.tif:0003-0197	1.048	879.45	0	3786	79.377	20.161	0.919	921.827	87945	1.336	0.748	0.935	1.73701
122	ANKRD26_KAN497-32_5.tif:0004-0215	0.87	635.422	0	2569	13.996	22.051	0.959	552.813	52740	1.228	0.814	0.938	1.04167
123	ANKRD26_KAN497-32_5.tif:0005-0223	0.839	602.487	0	1828	88.165	22.807	0.994	505.215	48199	1.097	0.912	0.92	0.951981
124	ANKRD26_KAN497-32_5.tif:0006-0517	1.027	860.071	0	3749	123.618	52.946	0.961	883.484	84287	1.191	0.84	0.929	1.66476
125	ANKRD26_KAN497-32_5.tif:0007-0623	0.786	752.867	0	2352	27.637	63.787	0.961	591.858	56465	1.236	0.809	0.968	1.11524
126	ANKRD26_KAN497-32_5.tif:0008-0767	0.901	836.453	0	3352	99.027	78.56	0.927	754.013	71935	1.359	0.736	0.95	1.42079
127	ANKRD26_KAN497-32_5.tif:0009-0920	0.807	554.714	30	1506	119.805	94.251	0.972	447.712	42713	1.286	0.778	0.945	0.843627
128	ANKRD26_KAN497-32_5.tif:0010-0934	0.786	590.253	27	1265	13.759	95.655	0.961	464.021	44269	1.011	0.989	0.968	0.87436
129	ANKRD26_KAN497-32_6.tif:0001-0047	1.205	712.33	0	2587	128.026	4.79	0.851	858.653	81918	1.483	0.675	0.895	1.61797
130	ANKRD26_KAN497-32_6.tif:0002-0131	1.09	678.894	0	3498	32.067	13.461	0.861	740.072	70605	1.378	0.726	0.9	1.39452
131	ANKRD26_KAN497-32_6.tif:0003-0264	1.017	593.753	0	3352	70.357	27.091	0.933	603.692	57594	1.336	0.749	0.956	1.13754
132	ANKRD26_KAN497-32_6.tif:0004-0420	1.09	763.375	0	3685	97.845	42.993	0.887	832.165	79391	1.394	0.717	0.912	1.56806
133	ANKRD26_KAN497-32_6.tif:0005-0459	0.818	654.679	0	2055	57.739	46.99	0.853	535.256	51065	1.423	0.703	0.945	1.00859
134	ANKRD26_KAN497-32_6.tif:0006-0534	0.797	377.368	0	876	15.46	54.706	0.892	300.62	28680	1.405	0.712	0.938	0.56646
135	ANKRD26_KAN497-32_6.tif:0007-0808	0.797	555.882	0	2687	10.722	82.778	0.911	442.827	42247	1.542	0.648	0.916	0.834423
136	ANKRD26_KAN497-32_6.tif:0008-0812	1.184	645.354	0	3393	102.872	83.193	0.871	764.39	72925	1.302	0.768	0.9	1.44035
137	ANKRD26_KAN497-32_6.tif:0009-0816	0.943	523.644	0	1791	61.955	83.599	0.895	493.989	47128	1.542	0.648	0.933	0.930828
138	ANKRD26_KAN497-32_6.tif:0010-0869	0.901	656.221	0	3578	127.238	88.971	0.776	591.544	56435	1.906	0.525	0.905	1.11465
139	ANKRD26_KAN497-32_6.tif:0011-0972	0.996	512.253	0	1573	126.537	99.613	0.846	510.089	48664	1.532	0.653	0.913	0.961166
										54225.3				1.07101
140	ANKRD26_KAN497-33_1.tif:0001-0108	1.195	638.228	0	2127	74.797	11.063	0.943	762.639	72758	1.376	0.727	0.95	1.43705
141	ANKRD26_KAN497-33_1.tif:0002-0181	0.65	625.806	0	2745	16.863	18.544	0.944	406.696	38800	1.358	0.736	0.954	0.766341
142	ANKRD26_KAN497-33_1.tif:0003-0199	1.069	423.137	0	1882	131.385	20.407	0.897	452.397	43160	1.197	0.835	0.907	0.852456
143	ANKRD26_KAN497-33_1.tif:0004-0375	1.038	673.475	0	3563	109.409	38.423	0.91	698.867	66674	1.312	0.762	0.93	1.31688
144	ANKRD26_KAN497-33_1.tif:0005-0426	1.038	623.838	0	2635	54.736	43.654	0.94	647.36	61760	1.257	0.795	0.925	1.21983
145	ANKRD26_KAN497-33_1.tif:0006-0449	0.88	837.464	0	3636	84.35	45.952	0.937	737.367	70347	1.271	0.787	0.933	1.38943
146	ANKRD26_KAN497-33_1.tif:0007-0636	0.88	503.619	0	2362	102.389	65.128	0.893	443.425	42304	1.391	0.719	0.903	0.835549
147	ANKRD26_KAN497-33_1.tif:0008-0669	0.839	619.013	0	2843	123.177	68.497	0.959	519.072	49521	1.392	0.719	0.936	0.978092
148	ANKRD26_KAN497-33_1.tif:0009-0688	0.849	601.025	0	2422	76.239	70.485	0.873	510.288	48683	1.53	0.654	0.931	0.961541
149	ANKRD26_KAN497-33_1.tif:0010-0690	0.985	674.394	0	3741	140.71	70.635	0.922	664.476	63393	1.262	0.792	0.917	1.25208
150	ANKRD26_KAN497-33_1.tif:0011-0779	0.786	610.44	0	2042	58.389	79.78	0.946	479.891	45783	1.127	0.888	0.932	0.904263
151	ANKRD26_KAN497-33_1.tif:0012-0800	0.65	502.742	0	1875	128.719	81.951	0.944	326.72	31170	1.471	0.68	0.947	0.615641
152	ANKRD26_KAN497-33_1.tif:0013-0895	1.048	665.2	0	3080	72.274	91.608	0.864	697.253	66520	1.467	0.682	0.93	1.31384
153	ANKRD26_KAN497-33_1.tif:0014-0934	0.88	684.667	0	2661	93.083	95.646	0.906	602.833	57512	1.517	0.659	0.949	1.13592
154	ANKRD26_KAN497-33_2.tif:0001-0034	0.922	741.455	0	2987	36.747	3.521	0.935	683.92	65248	1.488	0.672	0.931	1.28872
155	ANKRD26_KAN497-33_2.tif:0002-0096	1.017	886.474	0	3680	104.91	9.886	0.921	901.314	85988	1.408	0.71	0.933	1.69835
156	ANKRD26_KAN497-33_2.tif:0003-0236	0.776	546.662	0	1789	19.116	24.144	0.868	424.023	40453	1.342	0.745	0.919	0.79899
157	ANKRD26_KAN497-33_2.tif:0004-0306	0.86	447.061	0	1830	101.472	31.312	0.948	384.254	36659	1.093	0.915	0.911	0.724054
158	ANKRD26_KAN497-33_2.tif:0005-0405	0.734	491.414	0	1378	27.328	41.464	0.932	360.565	34399	1.367	0.732	0.946	0.679417
159	ANKRD26_KAN497-33_2.tif:0006-0455	0.692	696.621	52	1687	57.498	46.593	1	481.924	45977	1.137	0.88	0.964	0.908094
160	ANKRD26_KAN497-33_2.tif:0007-0490	1.059	576.327	0	2424	127.289	50.227	0.946	610.139	58209	1.34	0.746	0.927	1.14969
161	ANKRD26_KAN497-33_2.tif:0008-0673	1.08	726.854	0	3600	137.768	68.95	0.918	784.735	74866	1.214	0.824	0.936	1.47868
162	ANKRD26_KAN497-33_2.tif:0009-0737	0.66	633.683	0	1916	1.212	75.456	0.921	418.457	39922	1.142	0.875	0.94	0.788502
163	ANKRD26_KAN497-33_2.tif:0010-0878	0.807	799.948	0	3378	84.033	89.892	0.937	645.641	61596	1.4	0.714	0.957	1.21659
164	ANKRD26_KAN497-33_3.tif:0001-0034	1.038	617.232	0	2248	34.047	3.519	0.971	640.504	61106	1.14	0.877	0.934	1.20691
165	ANKRD26_KAN497-33_3.tif:0002-0049	0.786	829.213	9	3356	119.38	5.058	0.912	651.877	62191	1.443	0.693	0.943	1.22834
166	ANKRD26_KAN497-33_3.tif:0003-0232	0.776	743.135	0	3054	32.369	23.768	0.9	576.418	54992	1.394	0.717	0.931	1.08615
167	ANKRD26_KAN497-33_3.tif:0004-0349	0.828	854.608	0	3526	101.605	35.715	0.927	707.672	67514	1.325	0.755	0.958	1.33347
168	ANKRD26_KAN497-33_3.tif:0005-0426	0.912	871.793	0	3473	29.538	43.682	0.971	795.007	75846	1.257	0.796	0.951	1.49804
169	ANKRD26_KAN497-33_3.tif:0006-0562	0.702	624.507	0	1730	8.76	57.563	0.98	438.582	41842	1.141	0.876	0.971	0.826424
170	ANKRD26_KAN497-33_3.tif:0007-0586	0.964	748.598	0	2746	52.021	60.035	0.945	721.896	68871	1.069	0.935	0.929	1.36028
171	ANKRD26_KAN497-33_3.tif:0008-0633	0.744	662.423	28	2016	130.195	64.867	0.945	492.983	47032	1.113	0.899	0.94	0.928932
172	ANKRD26_KAN497-33_3.tif:0009-0783	0.922	818.557	0	3659	126.536	80.156	0.917	755.04	72033	1.306	0.766	0.957	1.42273
173	ANKRD26_KAN497-33_3.tif:0010-0867	0.828	597.823	0	2712	58.884	88.813	0.961	495.037	47228	1.075	0.931	0.946	0.932803
174	ANKRD26_KAN497-33_4.tif:0001-0116	0.912	429.264	0	1050	31.712	11.886	0.957	391.456	37346	1.203	0.831	0.926	0.737623
175	ANKRD26_KAN497-33_4.tif:0002-0241	0.818	646.013	0	2630	73.721	24.696	0.949	528.17	50389	1.168	0.856	0.94	0.995236
176	ANKRD26_KAN497-33_4.tif:0003-0303	0.88	704.643	0	2950	113.119	31.012	0.893	620.421	59190	1.353	0.739	0.913	1.16907
177	ANKRD26_KAN497-33_4.tif:0004-0407	0.818	961.59	0	3680	104.478	41.723	0.949	786.181	75004	1.123	0.891	0.951	1.48141
178	ANKRD26_KAN497-33_4.tif:0005-0497	0.954	656.187	0	2576	22.086	50.885	0.935	625.903	59713	1.165	0.858	0.938	1.17939
179	ANKRD26_KAN497-33_4.tif:0006-0513	0.912	601.598	0	2420	61.043	52.508	0.938	548.61	52339	1.125	0.889	0.946	1.03375
180	ANKRD26_KAN497-33_4.tif:0007-0554	0.933	511	0	1815	117.541	56.713	0.959	476.704	45479	1.115	0.897	0.952	0.898258
181	ANKRD26_KAN497-33_4.tif:0008-0611	0.797	569.368	0	2522	38.101	62.574	0.924	453.571	43272	1.082	0.925	0.933	0.854668
182	ANKRD26_KAN497-33_4.tif:0009-0717	0.723	555.71	0	1645	4.056	73.433	0.918	401.916	38344	1.19	0.84	0.932	0.757335
183	ANKRD26_KAN497-33_4.tif:0010-0818	0.66	625.698	0	2159	38.14	83.75	0.959	413.184	39419	1.267	0.789	0.947	0.778567
184	ANKRD26_KAN497-33_4.tif:0011-0884	0.692	612.545	0	1951	33.733	90.503	0.965	423.761	40428	1.136	0.88	0.957	0.798496
185	ANKRD26_KAN497-33_4.tif:0012-0884	0.671	859.844	28	2819	60.886	90.487	0.974	576.817	55030	1.167	0.857	0.948	1.0869
186	ANKRD26_KAN497-33_4.tif:0013-0995	0.912	661.368	0	2755	141.312	101.891	0.894	603.116	57539	1.47	0.68	0.926	1.13646
187	ANKRD26_KAN497-33_5.tif:0001-0014	0.912	826.207	43	2282	41.561	1.455	0.971	753.436	71880	1.171	0.854	0.956	1.41971
188	ANKRD26_KAN497-33_5.tif:0002-0048	0.681	510.446	0	1679	28.756	4.951	0.914	347.778	33179	1.29	0.775	0.956	0.65532
189	ANKRD26_KAN497-33_5.tif:0003-0077	0.943	913.367	0	3726	76.786	7.923	0.925	861.64	82203	1.493	0.67	0.933	1.6236
190	ANKRD26_KAN497-33_5.tif:0004-0147	1.101	630.152	0	3148	134.049	15.093	0.924	693.543	66166	1.113	0.898	0.917	1.30685
191	ANKRD26_KAN497-33_5.tif:0005-0231	0.828	607.873	0	2131	97.445	23.691	0.913	503.36	48022	1.325	0.755	0.908	0.948485
192	ANKRD26_KAN497-33_5.tif:0006-0268	0.912	669.126	0	2119	77.116	27.459	0.971	610.191	58214	1.107	0.903	0.946	1.14979
193	ANKRD26_KAN497-33_5.tif:0007-0309	0.692	481.121	32	1280	28.024	31.673	0.949	332.841	31754	1.167	0.857	0.923	0.627175
194	ANKRD26_KAN497-33_5.tif:0008-0382	0.891	703.976	0	2998	57.98	39.12	0.916	627.213	59838	1.29	0.775	0.934	1.18186
195	ANKRD26_KAN497-33_5.tif:0009-0417	0.765	574.137	9	1302	10.065	42.744	1	439.316	41912	1.003	0.997	0.961	0.827806
196	ANKRD26_KAN497-33_5.tif:0010-0640	0.744	473.437	0	1129	37.324	65.543	0.945	352.337	33614	1.112	0.899	0.947	0.663912
197	ANKRD26_KAN497-33_5.tif:0011-0660	0.891	870.365	0	3726	126.08	67.624	0.949	775.458	73981	1.342	0.745	0.944	1.4612
198	ANKRD26_KAN497-33_5.tif:0012-0728	0.86	628.232	0	1672	100.335	74.587	0.962	539.973	51515	1.131	0.884	0.959	1.01748
199	ANKRD26_KAN497-33_5.tif:0013-0734	0.807	596.026	0	2583	79.043	75.193	0.937	481.054	45894	1.24	0.807	0.933	0.906455
200	ANKRD26_KAN497-33_5.tif:0014-0748	0.723	683.406	0	2516	26.942	76.582	0.954	494.272	47155	1.327	0.754	0.939	0.931361
201	ANKRD26_KAN497-33_6.tif:0001-0027	0.818	848.09	0	3653	46.041	2.788	0.915	693.385	66151	1.454	0.688	0.957	1.30655
202	ANKRD26_KAN497-33_6.tif:0002-0030	0.901	597.291	0	1424	7.832	3.071	0.974	538.422	51367	1.11	0.901	0.977	1.01455
203	ANKRD26_KAN497-33_6.tif:0003-0048	0.839	882.15	0	3648	71.649	4.949	0.973	739.726	70572	1.183	0.846	0.958	1.39387
204	ANKRD26_KAN497-33_6.tif:0004-0154	0.734	825.329	12	3292	103.854	15.8	0.932	605.568	57773	1.577	0.634	0.959	1.14108
205	ANKRD26_KAN497-33_6.tif:0005-0266	0.734	723.3	48	2278	48.072	27.264	0.932	530.707	50631	1.528	0.655	0.959	1.00002
206	ANKRD26_KAN497-33_6.tif:0006-0281	0.891	632.212	7	1826	58.624	28.78	0.949	563.274	53738	1.236	0.809	0.95	1.06138
207	ANKRD26_KAN497-33_6.tif:0007-0315	0.765	670.808	15	2654	31.528	32.255	0.972	513.286	48969	1.248	0.801	0.961	0.96719
208	ANKRD26_KAN497-33_6.tif:0008-0322	0.828	681.291	0	2248	137.252	32.947	0.927	564.155	53822	1.192	0.839	0.946	1.06304
209	ANKRD26_KAN497-33_6.tif:0009-0397	0.922	1009.19	19	3762	101.978	40.605	0.935	930.883	88809	1.364	0.733	0.936	1.75407
210	ANKRD26_KAN497-33_6.tif:0010-0574	0.912	553.356	0	1492	40.134	58.74	0.925	504.618	48142	1.06	0.943	0.916	0.950855
211	ANKRD26_KAN497-33_6.tif:0011-0617	0.702	506.463	6	1291	78.645	63.222	0.942	355.681	33933	1.179	0.848	0.964	0.670213
212	ANKRD26_KAN497-33_6.tif:0012-0622	0.66	795.349	0	3424	108.723	63.698	0.959	525.215	50107	1.172	0.853	0.947	0.989666
213	ANKRD26_KAN497-33_6.tif:0013-0672	0.65	725.5	0	2737	61.438	68.853	0.944	471.485	44981	1.326	0.754	0.939	0.888422
214	ANKRD26_KAN497-33_6.tif:0014-0830	0.922	824.716	0	3039	136.81	84.985	0.949	760.721	72575	1.055	0.948	0.946	1.43343
215	ANKRD26_KAN497-33_6.tif:0015-0836	0.755	748.278	0	2902	4.553	85.625	0.958	564.721	53876	1.082	0.924	0.947	1.06411
216	ANKRD26_KAN497-33_6.tif:0016-0946	0.765	777.384	0	2390	65.797	96.932	0.972	594.835	56749	1.169	0.855	0.967	1.12085
217	ANKRD26_KAN497-33_6.tif:0017-0947	0.702	691.687	0	1706	44.376	96.959	0.98	485.761	46343	1.115	0.897	0.964	0.915323
218	ANKRD26_KAN497-33_6.tif:0018-1004	0.629	547.933	51	1360	138.361	102.847	0.969	344.602	32876	1.284	0.779	0.976	0.649336
										54184.7				1.0702
219	ANKRD26_KAN497-34_1.tif:0001-0025	0.776	618.068	0	1361	133.254	2.604	0.948	479.409	45737	1.028	0.973	0.955	0.903354
220	ANKRD26_KAN497-34_1.tif:0002-0205	0.776	693.405	0	2388	107.201	20.967	0.948	537.845	51312	1.287	0.777	0.967	1.01347
221	ANKRD26_KAN497-34_1.tif:0003-0290	0.839	751.487	0	3278	42.015	29.669	0.939	630.159	60119	1.093	0.915	0.947	1.18741
222	ANKRD26_KAN497-34_1.tif:0004-0336	0.713	605.235	0	2250	24.981	34.4	0.941	431.391	41156	1.479	0.676	0.958	0.812875
223	ANKRD26_KAN497-34_1.tif:0005-0343	0.723	742.594	0	3190	64.084	35.077	0.918	537.08	51239	1.279	0.782	0.945	1.01202
224	ANKRD26_KAN497-34_1.tif:0006-0449	0.807	603.13	5	2586	3.482	45.99	0.937	486.788	46441	1.341	0.746	0.945	0.917259
225	ANKRD26_KAN497-34_1.tif:0007-0547	0.702	752.881	33	2805	77.037	55.996	0.942	528.736	50443	1.424	0.702	0.978	0.996303
226	ANKRD26_KAN497-34_1.tif:0008-0684	0.839	712.35	0	1772	66.411	70.017	0.973	597.34	56988	1.085	0.922	0.952	1.12557
227	ANKRD26_KAN497-34_1.tif:0009-0697	0.723	763.638	0	3065	86.56	71.4	0.993	552.3	52691	1.059	0.944	0.939	1.0407
228	ANKRD26_KAN497-34_1.tif:0010-0724	0.692	719.621	27	2415	44.212	74.15	0.988	497.836	47495	1.374	0.728	0.93	0.938077
229	ANKRD26_KAN497-34_1.tif:0011-0881	0.723	823.42	0	3044	115.828	90.203	0.97	595.537	56816	1.134	0.882	0.979	1.12218
230	ANKRD26_KAN497-34_1.tif:0012-0948	0.786	903.093	5	3071	118.958	97.059	0.983	709.957	67732	1.173	0.853	0.943	1.33778
231	ANKRD26_KAN497-34_1.tif:0013-0965	1.205	893.252	0	3634	138.023	98.846	0.897	1076.74	102724	1.594	0.627	0.958	2.02891
232	ANKRD26_KAN497-34_1.tif:0014-0974	0.755	538.847	0	1757	1.386	99.765	0.958	406.665	38797	1.138	0.879	0.947	0.766282
233	ANKRD26_KAN497-34_2.tif:0001-0023	0.671	611.297	9	1808	130.421	2.414	0.974	410.082	39123	1.417	0.706	0.962	0.772721
234	ANKRD26_KAN497-34_2.tif:0002-0052	1.027	531.143	1	1842	65.378	5.294	0.889	545.602	52052	1.089	0.918	0.912	1.02808
235	ANKRD26_KAN497-34_2.tif:0003-0219	0.765	585.397	53	1793	23.087	22.473	0.936	447.932	42734	1.559	0.641	0.973	0.844042
236	ANKRD26_KAN497-34_2.tif:0004-0238	0.954	625.165	0	2459	63.921	24.364	0.967	596.313	56890	1.182	0.846	0.938	1.12364
237	ANKRD26_KAN497-34_2.tif:0005-0357	0.765	714.712	20	2541	25.248	36.604	0.972	546.881	52174	1.181	0.847	0.961	1.03049
238	ANKRD26_KAN497-34_2.tif:0006-0557	0.943	702.722	0	3012	27.225	57.09	0.925	662.925	63245	1.122	0.891	0.923	1.24916
239	ANKRD26_KAN497-34_2.tif:0007-0644	0.88	883.893	0	3785	130.6	65.95	0.971	778.247	74247	1.04	0.962	0.939	1.46646
240	ANKRD26_KAN497-34_2.tif:0008-0800	0.755	606.764	0	2178	45.196	81.964	0.996	457.921	43687	1.08	0.926	0.947	0.862865
241	ANKRD26_KAN497-34_2.tif:0009-0853	0.692	561.03	20	1995	20.402	87.337	0.965	388.122	37028	1.161	0.861	0.964	0.731342
242	ANKRD26_KAN497-34_2.tif:0010-0940	0.849	681.148	57	1890	78.385	96.243	0.985	578.316	55173	1.118	0.894	0.959	1.08973
243	ANKRD26_KAN497-34_3.tif:0001-0016	0.87	680.169	0	2637	29.314	1.662	0.959	591.743	56454	1.096	0.912	0.938	1.11503
244	ANKRD26_KAN497-34_3.tif:0002-0058	0.849	535.654	0	1948	94.78	5.944	0.917	454.787	43388	1.383	0.723	0.964	0.856959
245	ANKRD26_KAN497-34_3.tif:0003-0061	1.163	720.252	0	3784	67.923	6.256	0.947	838.004	79948	1.385	0.722	0.949	1.57906
246	ANKRD26_KAN497-34_3.tif:0004-0170	0.996	711.137	0	3364	48.979	17.424	0.944	708.133	67558	1.151	0.869	0.936	1.33434
247	ANKRD26_KAN497-34_3.tif:0005-0281	0.88	596.952	0	2931	105.64	28.735	0.906	525.602	50144	1.329	0.752	0.933	0.990397
248	ANKRD26_KAN497-34_3.tif:0006-0442	1.153	677.009	0	3103	128.575	45.305	0.873	780.595	74471	1.269	0.788	0.898	1.47088
249	ANKRD26_KAN497-34_3.tif:0007-0444	0.713	448.029	0	1843	7.197	45.444	0.905	319.34	30466	1.328	0.753	0.932	0.601736
250	ANKRD26_KAN497-34_3.tif:0008-0497	1.101	750.838	0	3038	94.527	50.896	0.935	826.369	78838	1.183	0.845	0.95	1.55713
251	ANKRD26_KAN497-34_3.tif:0009-0547	0.797	279.684	0	937	76.656	56.027	0.911	222.802	21256	1.312	0.762	0.905	0.419829
252	ANKRD26_KAN497-34_3.tif:0010-0745	0.891	640.341	0	2733	30.315	76.314	0.903	570.517	54429	1.608	0.622	0.929	1.07503
253	ANKRD26_KAN497-34_3.tif:0011-0791	1.163	531.883	0	1857	104.185	81.021	0.907	618.838	59039	1.22	0.82	0.91	1.16608
254	ANKRD26_KAN497-34_3.tif:0012-0836	0.933	664.978	0	2260	68.468	85.651	0.959	620.348	59183	1.24	0.806	0.957	1.16893
255	ANKRD26_KAN497-34_3.tif:0013-0879	0.87	475.313	0	2112	65.642	89.984	0.959	413.52	39451	1.571	0.636	0.949	0.779199
256	ANKRD26_KAN497-34_3.tif:0014-0932	0.901	473.256	0	2179	49.113	95.457	0.927	426.612	40700	1.201	0.833	0.94	0.803868
257	ANKRD26_KAN497-34_3.tif:0015-0987	1.08	701.485	0	3653	123.499	101.103	0.878	757.346	72253	1.599	0.625	0.928	1.42707
258	ANKRD26_KAN497-34_4.tif:0001-0034	0.922	529.625	0	2442	20.854	3.472	0.968	488.528	46607	1.135	0.881	0.917	0.920538
259	ANKRD26_KAN497-34_4.tif:0002-0125	1.132	616.139	0	3771	112.019	12.837	0.846	697.494	66543	1.685	0.594	0.896	1.31429
260	ANKRD26_KAN497-34_4.tif:0003-0159	1.069	637.02	0	3051	62.794	16.311	0.968	681.069	64976	1.115	0.897	0.94	1.28334
261	ANKRD26_KAN497-34_4.tif:0004-0343	1.006	560.375	0	2136	39.575	35.115	0.924	563.882	53796	1.252	0.798	0.941	1.06253
262	ANKRD26_KAN497-34_4.tif:0005-0390	0.765	410.986	0	1480	10.56	39.95	0.936	314.477	30002	1.25	0.8	0.961	0.592571
263	ANKRD26_KAN497-34_4.tif:0006-0455	1.101	653.333	0	2738	140.646	46.595	0.869	719.056	68600	1.54	0.649	0.921	1.35492
264	ANKRD26_KAN497-34_4.tif:0007-0540	1.132	582.204	0	2257	92.84	55.297	0.894	659.078	62878	1.351	0.74	0.931	1.24191
265	ANKRD26_KAN497-34_4.tif:0008-0728	0.985	500.138	0	1557	74.966	74.587	0.904	492.784	47013	1.452	0.689	0.949	0.928557
266	ANKRD26_KAN497-34_4.tif:0009-0907	0.901	460.605	0	2017	85.473	92.877	0.884	415.207	39612	1.475	0.678	0.905	0.782379
267	ANKRD26_KAN497-34_4.tif:0010-0937	0.933	564.573	0	2380	4.975	95.999	0.959	526.682	50247	1.218	0.821	0.957	0.992431
268	ANKRD26_KAN497-34_4.tif:0011-0966	0.639	479.918	0	1570	37.397	98.946	0.892	306.856	29275	1.194	0.838	0.924	0.578212
269	ANKRD26_KAN497-34_5.tif:0001-0011	0.765	346.329	0	1065	9.986	1.158	0.907	265.002	25282	1.536	0.651	0.88	0.499346
270	ANKRD26_KAN497-34_5.tif:0002-0151	1.184	666.106	0	3741	110.303	15.452	0.896	788.97	75270	1.274	0.785	0.915	1.48666
271	ANKRD26_KAN497-34_5.tif:0003-0163	0.786	254	0	629	54.069	16.649	0.867	199.679	19050	1.697	0.589	0.92	0.376258
272	ANKRD26_KAN497-34_5.tif:0004-0242	0.765	329.178	0	1241	48.842	24.763	0.972	251.879	24030	1.253	0.798	0.961	0.474618
273	ANKRD26_KAN497-34_5.tif:0005-0267	0.975	488.871	0	2202	140.679	27.338	0.855	476.558	45465	1.844	0.542	0.921	0.897982
274	ANKRD26_KAN497-34_5.tif:0006-0315	0.996	479.937	0	2561	12.079	32.245	0.902	477.91	45594	1.351	0.74	0.896	0.90053
275	ANKRD26_KAN497-34_5.tif:0007-0329	1.216	578.664	0	3683	127.929	33.728	0.868	703.595	67125	1.489	0.671	0.91	1.32579
276	ANKRD26_KAN497-34_5.tif:0008-0367	1.059	815.772	0	3752	98.951	37.633	0.9	863.632	82393	1.354	0.739	0.935	1.62735
277	ANKRD26_KAN497-34_5.tif:0009-0429	0.975	367.613	0	1439	47.367	43.93	0.924	358.354	34188	1.306	0.766	0.935	0.675249
278	ANKRD26_KAN497-34_5.tif:0010-0478	1.111	532.198	0	3183	93.937	48.915	0.904	591.313	56413	1.491	0.671	0.926	1.11422
279	ANKRD26_KAN497-34_5.tif:0011-0564	0.996	598.968	0	2129	69.754	57.808	0.914	596.439	56902	1.415	0.707	0.955	1.12387
280	ANKRD26_KAN497-34_5.tif:0012-0579	1.331	512.504	0	2628	129.844	59.254	0.888	682.243	65088	1.25	0.8	0.917	1.28556
281	ANKRD26_KAN497-34_5.tif:0013-0601	0.922	577.352	0	2735	14.877	61.59	0.875	532.552	50807	1.605	0.623	0.936	1.00349
282	ANKRD26_KAN497-34_5.tif:0014-0804	0.933	557.371	0	2378	113.005	82.34	0.818	519.963	49606	1.693	0.591	0.89	0.979771
283	ANKRD26_KAN497-34_5.tif:0015-0959	1.122	751.103	0	3720	115.098	98.27	0.885	842.406	80368	1.648	0.607	0.939	1.58735
284	ANKRD26_KAN497-34_6.tif:0001-0109	0.797	580.908	0	2174	9.303	11.23	0.924	462.764	44149	1.389	0.72	0.938	0.871989
285	ANKRD26_KAN497-34_6.tif:0002-0131	1.226	891.778	0	3451	87.282	13.462	0.866	1093.66	104338	1.445	0.692	0.914	2.06079
286	ANKRD26_KAN497-34_6.tif:0003-0302	0.734	659.786	0	2660	38.476	30.904	0.968	484.105	46185	1.288	0.776	0.952	0.912203
287	ANKRD26_KAN497-34_6.tif:0004-0328	0.786	518.013	48	1570	108.993	33.556	0.912	407.231	38851	1.395	0.717	0.932	0.767348
288	ANKRD26_KAN497-34_6.tif:0005-0354	0.776	424.149	9	1342	11.871	36.244	0.9	328.994	31387	1.144	0.874	0.925	0.619926
289	ANKRD26_KAN497-34_6.tif:0006-0461	0.891	519.588	0	1359	18.416	47.192	0.983	462.931	44165	1.082	0.925	0.934	0.872306
290	ANKRD26_KAN497-34_6.tif:0007-0477	0.681	873.185	0	2929	69.429	48.89	0.951	594.919	56757	1.229	0.814	0.956	1.12101
291	ANKRD26_KAN497-34_6.tif:0008-0500	0.86	643.78	0	2073	122.862	51.172	1	553.337	52790	1.072	0.933	0.932	1.04266
292	ANKRD26_KAN497-34_6.tif:0009-0662	0.734	731.871	0	2646	87.536	67.776	0.968	536.996	51231	1.335	0.749	0.946	1.01187
293	ANKRD26_KAN497-34_6.tif:0010-0707	0.713	559.132	55	2036	73.199	72.371	0.941	398.531	38021	1.319	0.758	0.932	0.750955
294	ANKRD26_KAN497-34_6.tif:0011-0722	0.681	516.369	12	1765	31.057	73.962	0.935	351.813	33564	1.439	0.695	0.929	0.662925
295	ANKRD26_KAN497-34_6.tif:0012-0796	0.765	719.753	0	2879	129.665	81.546	0.972	550.738	52542	1.248	0.801	0.961	1.03776
296	ANKRD26_KAN497-34_6.tif:0013-0819	0.839	742.975	0	2601	77.031	83.858	0.973	623.021	59438	1.405	0.712	0.958	1.17396
										52617.6				1.03925
297	ANKRD26_KAN497-35_1.tif:0001-0107	1.101	533.629	0	2144	99.414	10.986	0.896	587.309	56031	1.385	0.722	0.913	1.10667
298	ANKRD26_KAN497-35_1.tif:0002-0109	1.027	702.796	0	3751	51.717	11.156	0.93	721.928	68874	1.316	0.76	0.925	1.36033
299	ANKRD26_KAN497-35_1.tif:0003-0265	1.205	745.27	0	3068	103.606	27.186	0.924	898.358	85706	1.315	0.761	0.954	1.69278
300	ANKRD26_KAN497-35_1.tif:0004-0358	0.786	578.347	0	2225	56.825	36.708	0.912	454.661	43376	1.476	0.678	0.943	0.856722
301	ANKRD26_KAN497-35_1.tif:0005-0556	0.88	435.595	0	1684	131.918	56.993	0.971	383.531	36590	1.288	0.776	0.939	0.722691
302	ANKRD26_KAN497-35_1.tif:0006-0595	1.289	670.683	0	2261	97.439	60.886	0.885	864.69	82494	1.398	0.715	0.928	1.62934
303	ANKRD26_KAN497-35_1.tif:0007-0692	0.901	435.837	0	1763	55.896	70.881	0.884	392.881	37482	1.443	0.693	0.901	0.740309
304	ANKRD26_KAN497-35_1.tif:0008-0874	0.671	411.828	0	1316	30.932	89.534	0.936	276.27	26357	1.408	0.71	0.955	0.520579
305	ANKRD26_KAN497-35_1.tif:0009-0926	1.048	368.36	0	1141	131.59	94.825	0.864	386.11	36836	1.552	0.644	0.935	0.72755
306	ANKRD26_KAN497-35_1.tif:0010-0946	0.786	441.547	0	1729	85.546	96.856	0.88	347.117	33116	1.552	0.644	0.926	0.654076
307	ANKRD26_KAN497-35_2.tif:0001-0060	0.86	482.732	0	2679	140.229	6.159	0.815	414.914	39584	1.951	0.512	0.921	0.781826
308	ANKRD26_KAN497-35_2.tif:0002-0163	1.069	639.98	0	2122	40.695	16.69	0.909	684.235	65278	1.276	0.784	0.949	1.28931
309	ANKRD26_KAN497-35_2.tif:0003-0247	1.143	539.477	0	2552	134.173	25.312	0.93	616.365	58803	1.434	0.697	0.932	1.16142
310	ANKRD26_KAN497-35_2.tif:0004-0316	0.985	596.691	0	2382	85.244	32.358	0.934	587.917	56089	1.299	0.77	0.94	1.10782
311	ANKRD26_KAN497-35_2.tif:0005-0520	0.828	542.392	0	2517	55.284	53.276	0.961	449.137	42849	1.142	0.875	0.946	0.846313
312	ANKRD26_KAN497-35_2.tif:0006-0524	1.038	639.323	0	2117	106.344	53.651	0.952	663.428	63293	1.126	0.888	0.957	1.2501
313	ANKRD26_KAN497-35_2.tif:0007-0582	0.912	582.287	0	2500	18.294	59.62	0.907	531.001	50659	1.251	0.8	0.946	1.00057
314	ANKRD26_KAN497-35_2.tif:0008-0591	0.818	309.936	0	894	125.83	60.487	0.902	253.399	24175	1.325	0.755	0.897	0.477482
315	ANKRD26_KAN497-35_2.tif:0009-0662	0.818	509.91	0	1970	41.323	67.821	0.935	416.895	39773	1.267	0.789	0.907	0.785559
316	ANKRD26_KAN497-35_2.tif:0010-0721	0.839	572.5	0	2741	88.14	73.799	0.893	480.069	45800	1.529	0.654	0.936	0.904598
317	ANKRD26_KAN497-35_2.tif:0011-0774	0.713	403.676	0	1161	115.361	79.308	0.905	287.727	27450	1.576	0.634	0.944	0.542167
318	ANKRD26_KAN497-35_2.tif:0012-0832	0.964	568.261	0	2417	47.615	85.24	0.914	547.992	52280	1.28	0.781	0.925	1.03259
319	ANKRD26_KAN497-35_3.tif:0001-0102	1.09	737.096	0	3736	68.46	10.446	0.915	803.518	76658	1.443	0.693	0.92	1.51408
320	ANKRD26_KAN497-35_3.tif:0002-0129	0.985	458.245	0	2060	24.158	13.263	0.904	451.506	43075	1.393	0.718	0.949	0.850777
321	ANKRD26_KAN497-35_3.tif:0003-0136	0.922	633.25	0	3243	111.168	13.954	0.875	584.112	55726	1.65	0.606	0.941	1.10065
322	ANKRD26_KAN497-35_3.tif:0004-0145	0.996	653.663	0	3062	122.013	14.903	0.873	650.902	62098	1.503	0.665	0.922	1.2265
323	ANKRD26_KAN497-35_3.tif:0005-0493	0.692	380.591	0	1229	2.749	50.444	0.913	263.294	25119	1.445	0.692	0.93	0.496127
324	ANKRD26_KAN497-35_3.tif:0006-0558	1.09	652.587	0	3661	104.269	57.158	0.898	711.393	67869	1.205	0.83	0.933	1.34048
325	ANKRD26_KAN497-35_3.tif:0007-0583	1.195	575.711	0	2524	82.588	59.658	0.889	687.935	65631	1.295	0.772	0.946	1.29628
326	ANKRD26_KAN497-35_3.tif:0008-0670	1.195	602.904	0	2653	125.781	68.637	0.932	720.429	68731	1.425	0.702	0.934	1.35751
327	ANKRD26_KAN497-35_3.tif:0009-0741	0.985	334.66	0	751	109.09	75.848	0.934	329.738	31458	1.217	0.822	0.935	0.621329
328	ANKRD26_KAN497-35_3.tif:0010-0743	0.797	381.671	0	1144	35.898	76.069	0.959	304.047	29007	1.404	0.712	0.938	0.572919
329	ANKRD26_KAN497-35_3.tif:0011-0833	0.996	509.674	0	1680	62.36	85.299	0.932	507.521	48419	1.228	0.814	0.918	0.956327
330	ANKRD26_KAN497-35_3.tif:0012-1000	1.048	743.47	0	3513	110.694	102.437	0.907	779.295	74347	1.575	0.635	0.922	1.46843
331	ANKRD26_KAN497-35_4.tif:0001-0019	0.933	689.64	17	2560	27.707	1.93	0.946	643.356	61378	1.417	0.706	0.937	1.21228
332	ANKRD26_KAN497-35_4.tif:0002-0069	1.101	921.352	0	3664	83.364	7.036	0.924	1014.04	96742	1.302	0.768	0.929	1.91076
333	ANKRD26_KAN497-35_4.tif:0003-0132	0.702	469.134	0	1411	83.843	13.57	0.942	329.466	31432	1.424	0.702	0.978	0.620815
334	ANKRD26_KAN497-35_4.tif:0004-0219	0.807	845.312	0	2800	106.093	22.486	0.972	682.254	65089	1.219	0.82	0.945	1.28558
335	ANKRD26_KAN497-35_4.tif:0005-0258	0.943	772.311	17	3586	62.806	26.403	0.957	728.573	69508	1.356	0.738	0.942	1.37286
336	ANKRD26_KAN497-35_4.tif:0006-0416	0.933	574.225	0	1731	30.317	42.576	0.993	535.686	51106	1.032	0.969	0.957	1.0094
337	ANKRD26_KAN497-35_4.tif:0007-0509	0.786	683.147	0	2360	108.841	52.154	0.946	537.049	51236	1.38	0.725	0.943	1.01197
338	ANKRD26_KAN497-35_4.tif:0008-0554	0.922	804.966	0	3130	77.243	56.689	0.904	742.503	70837	1.375	0.727	0.931	1.39911
339	ANKRD26_KAN497-35_4.tif:0009-0772	0.86	693.573	0	2470	135.695	79.086	0.915	596.135	56873	1.493	0.67	0.943	1.1233
340	ANKRD26_KAN497-35_4.tif:0010-0866	0.839	549.087	0	1552	88.429	88.695	0.925	460.437	43927	1.409	0.71	0.93	0.867605
341	ANKRD26_KAN497-35_4.tif:0011-0895	0.818	645.449	0	2019	66.934	91.62	0.949	527.709	50345	1.17	0.855	0.945	0.994367
342	ANKRD26_KAN497-35_5.tif:0001-0028	1.74	1.837	0	12	77.437	2.904	0.845	3.197	305	1.083	0.924	0.874	0.00602407
343	ANKRD26_KAN497-35_5.tif:0002-0088	0.818	914.154	0	3665	130.794	8.996	0.949	747.398	71304	1.184	0.845	0.94	1.40833
344	ANKRD26_KAN497-35_5.tif:0003-0141	1.006	843.719	0	2071	59.834	14.451	0.986	848.999	80997	1.132	0.883	0.955	1.59978
345	ANKRD26_KAN497-35_5.tif:0004-0280	0.744	464.732	41	1395	71.914	28.727	1	345.859	32996	1.171	0.854	0.947	0.651706
346	ANKRD26_KAN497-35_5.tif:0005-0296	1.09	647.317	0	3174	114.64	30.328	0.944	705.649	67321	1.123	0.89	0.92	1.32966
347	ANKRD26_KAN497-35_5.tif:0006-0356	0.839	671.2	0	1978	12.121	36.426	0.973	562.834	53696	1.141	0.876	0.958	1.06055
348	ANKRD26_KAN497-35_5.tif:0007-0404	0.87	881.241	0	3652	93.239	41.404	0.959	766.675	73143	1.293	0.774	0.938	1.44465
349	ANKRD26_KAN497-35_5.tif:0008-0748	0.713	511.853	0	1688	27.665	76.604	0.941	364.832	34806	1.097	0.912	0.932	0.687455
350	ANKRD26_KAN497-35_5.tif:0009-0763	0.849	872.074	0	2692	115.777	78.169	0.95	740.418	70638	1.13	0.885	0.953	1.39518
351	ANKRD26_KAN497-35_5.tif:0010-0866	0.849	835.111	0	3102	137.799	88.717	0.985	709.035	67644	1.129	0.885	0.959	1.33604
352	ANKRD26_KAN497-35_5.tif:0011-0954	0.807	625.26	0	2043	69.295	97.707	0.972	504.649	48145	1.071	0.934	0.939	0.950915
353	ANKRD26_KAN497-35_6.tif:0001-0006	0.755	921.639	0	3438	98.163	0.648	0.857	695.555	66358	1.576	0.634	0.973	1.31064
354	ANKRD26_KAN497-35_6.tif:0002-0048	1.006	806.635	0	3421	34.57	4.937	0.911	811.684	77437	1.372	0.729	0.932	1.52946
355	ANKRD26_KAN497-35_6.tif:0003-0099	1.226	773.316	0	3665	109.286	10.176	0.928	948.378	90478	1.189	0.841	0.929	1.78704
356	ANKRD26_KAN497-35_6.tif:0004-0155	1.038	479.485	0	1497	131.835	15.84	0.94	497.563	47469	1.255	0.797	0.93	0.937563
357	ANKRD26_KAN497-35_6.tif:0005-0166	1.143	616.817	0	2333	121.19	16.995	0.959	704.727	67233	1.265	0.791	0.936	1.32792
358	ANKRD26_KAN497-35_6.tif:0006-0279	0.996	741.263	0	2718	40.449	28.586	0.914	738.133	70420	1.42	0.704	0.95	1.39087
359	ANKRD26_KAN497-35_6.tif:0007-0560	1.027	549.735	0	2449	37.093	57.332	0.93	564.7	53874	1.199	0.834	0.916	1.06407
360	ANKRD26_KAN497-35_6.tif:0008-0674	0.797	770.526	0	3275	118.782	69.078	0.861	613.818	58560	1.764	0.567	0.962	1.15662
361	ANKRD26_KAN497-35_6.tif:0009-0880	1.122	732.346	0	3759	105.05	90.127	0.913	821.369	78361	1.224	0.817	0.922	1.54771
362	ANKRD26_KAN497-35_6.tif:0010-0903	0.702	666.478	0	2051	56.173	92.446	0.98	468.057	44654	1.159	0.863	0.971	0.881964
363	ANKRD26_KAN497-35_6.tif:0011-0926	0.86	474.866	0	2233	39.067	94.845	0.948	408.153	38939	1.233	0.811	0.927	0.769086
										54690.8				1.0802
364	ANKRD26_KAN497-36_1.tif:0001-0065	0.671	752.484	0	2731	98.348	6.655	0.936	504.796	48159	1.199	0.834	0.948	0.951191
365	ANKRD26_KAN497-36_1.tif:0002-0085	0.671	850.984	0	3094	59.056	8.733	0.974	570.873	54463	1.167	0.857	0.948	1.0757
366	ANKRD26_KAN497-36_1.tif:0003-0094	0.671	698.141	37	2308	21.953	9.613	0.974	468.34	44681	1.179	0.848	0.948	0.882497
367	ANKRD26_KAN497-36_1.tif:0004-0184	0.922	662.17	0	2836	105.106	18.828	0.968	610.788	58271	1.272	0.786	0.921	1.15091
368	ANKRD26_KAN497-36_1.tif:0005-0198	0.713	449.441	71	956	15.749	20.289	0.941	320.347	30562	1.112	0.899	0.932	0.603632
369	ANKRD26_KAN497-36_1.tif:0006-0279	0.912	674.195	0	2528	88.148	28.548	0.971	614.813	58655	1.085	0.922	0.941	1.1585
370	ANKRD26_KAN497-36_1.tif:0007-0280	0.828	681.937	0	2522	132.501	28.671	0.882	564.689	53873	1.608	0.622	0.929	1.06405
371	ANKRD26_KAN497-36_1.tif:0008-0323	0.818	780.5	0	3130	58.097	33.045	0.949	638.125	60879	1.088	0.919	0.94	1.20242
372	ANKRD26_KAN497-36_1.tif:0009-0492	0.639	555.246	0	1734	70.508	50.377	0.892	355.021	33870	1.335	0.749	0.938	0.668968
373	ANKRD26_KAN497-36_1.tif:0010-0505	0.88	801.452	0	3759	131.724	51.746	0.906	705.66	67322	1.42	0.704	0.933	1.32968
374	ANKRD26_KAN497-36_1.tif:0011-0684	0.797	750.013	0	3190	136.339	70.027	0.924	597.476	57001	1.409	0.71	0.938	1.12583
375	ANKRD26_KAN497-36_1.tif:0012-0703	0.639	512.475	0	1651	59.553	72.008	1	327.673	31261	1.186	0.843	0.938	0.617438
376	ANKRD26_KAN497-36_1.tif:0013-0780	0.839	659.962	0	2874	42.409	79.852	0.925	553.411	52797	1.26	0.794	0.914	1.0428
377	ANKRD26_KAN497-36_1.tif:0014-0854	0.66	480.794	0	1653	80.54	87.424	0.959	317.496	30290	1.202	0.832	0.947	0.59826
378	ANKRD26_KAN497-36_2.tif:0001-0043	0.776	807.581	0	2811	32.401	4.448	0.948	626.406	59761	1.218	0.821	0.967	1.18034
379	ANKRD26_KAN497-36_2.tif:0002-0115	0.954	786.11	0	3557	119.261	11.809	0.935	749.83	71536	1.134	0.882	0.929	1.41291
380	ANKRD26_KAN497-36_2.tif:0003-0153	1.027	879.439	0	3735	92.968	15.643	0.93	903.379	86185	1.269	0.788	0.929	1.70225
381	ANKRD26_KAN497-36_2.tif:0004-0211	0.901	894.186	0	3753	54.624	21.673	0.994	806.055	76900	1.245	0.803	0.956	1.51886
382	ANKRD26_KAN497-36_2.tif:0005-0379	0.765	489.493	0	1720	40.753	38.856	0.956	374.548	35733	1.375	0.727	0.924	0.705765
383	ANKRD26_KAN497-36_2.tif:0006-0475	0.996	794.979	0	3775	88.833	48.692	0.902	791.621	75523	1.463	0.684	0.918	1.49166
384	ANKRD26_KAN497-36_2.tif:0007-0508	0.818	812.641	0	3147	115.75	52.006	0.915	664.403	63386	1.31	0.763	0.951	1.25194
385	ANKRD26_KAN497-36_2.tif:0008-0587	0.922	620.591	0	2877	132.5	60.103	0.949	572.435	54612	1.135	0.881	0.951	1.07864
386	ANKRD26_KAN497-36_2.tif:0009-0629	0.797	757.132	0	3307	34.246	64.46	0.996	603.147	57542	1.11	0.901	0.95	1.13652
387	ANKRD26_KAN497-36_2.tif:0010-0676	0.776	475.838	0	1549	70.593	69.277	0.948	369.087	35212	1.144	0.874	0.961	0.695474
388	ANKRD26_KAN497-36_2.tif:0011-0832	0.692	717.227	0	2855	17.403	85.245	0.965	496.18	47337	1.192	0.839	0.964	0.934956
389	ANKRD26_KAN497-36_2.tif:0012-0840	0.65	453.516	11	1363	83.66	86.069	0.944	294.729	28118	1.397	0.716	0.954	0.55536
390	ANKRD26_KAN497-36_2.tif:0013-0911	0.901	736.581	0	2054	77.4	93.275	0.994	663.984	63346	1.024	0.977	0.945	1.25115
391	ANKRD26_KAN497-36_2.tif:0014-0958	0.891	799.224	0	2922	137.143	98.086	0.962	712.075	67934	1.105	0.905	0.971	1.34177
392	ANKRD26_KAN497-36_3.tif:0001-0215	0.828	834.443	0	3682	60.851	21.998	0.997	690.975	65921	1.123	0.89	0.952	1.30201
393	ANKRD26_KAN497-36_3.tif:0002-0226	0.702	592.896	18	1834	132.219	23.122	0.942	416.381	39724	1.149	0.87	0.964	0.784591
394	ANKRD26_KAN497-36_3.tif:0003-0228	0.713	941.662	61	3418	32.25	23.394	0.994	671.185	64033	1.122	0.891	0.971	1.26472
395	ANKRD26_KAN497-36_3.tif:0004-0321	0.828	874.215	0	3306	97.224	32.869	0.961	723.909	69063	1.175	0.851	0.946	1.36407
396	ANKRD26_KAN497-36_3.tif:0005-0508	0.755	677.375	0	2232	75.797	52.055	0.996	511.211	48771	1.028	0.972	0.954	0.963279
397	ANKRD26_KAN497-36_3.tif:0006-0540	0.692	531.091	2	1282	71.614	55.275	0.965	367.41	35052	1.178	0.849	0.964	0.692314
398	ANKRD26_KAN497-36_3.tif:0007-0541	0.744	846.028	24	3598	96.209	55.448	1	629.624	60068	1.012	0.989	0.947	1.18641
399	ANKRD26_KAN497-36_3.tif:0008-0600	0.65	675.694	34	2462	42.384	61.478	0.984	439.117	41893	1.136	0.881	0.939	0.827431
400	ANKRD26_KAN497-36_3.tif:0009-0757	0.681	636.092	62	2079	27.944	77.549	0.99	433.383	41346	1.146	0.872	0.956	0.816627
401	ANKRD26_KAN497-36_3.tif:0010-0768	0.755	1081.61	41	3762	95.064	78.694	0.958	816.285	77876	1.209	0.827	0.954	1.53813
402	ANKRD26_KAN497-36_3.tif:0011-0794	0.828	839.747	4	3116	52.72	81.346	0.997	695.367	66340	1.115	0.896	0.952	1.31029
403	ANKRD26_KAN497-36_3.tif:0012-0898	0.807	659.61	8	2534	108.111	91.995	1	532.374	50790	1.119	0.894	0.945	1.00316
404	ANKRD26_KAN497-36_3.tif:0013-0977	0.692	554	32	1350	80.205	100.026	0.965	383.259	36564	1.176	0.85	0.964	0.722178
405	ANKRD26_KAN497-36_4.tif:0001-0087	1.143	628.128	0	1802	104.366	9.018	0.742	717.651	68466	1.936	0.516	0.862	1.35228
406	ANKRD26_KAN497-36_4.tif:0002-0333	0.66	605.714	0	2381	40.776	34.076	0.959	399.988	38160	1.167	0.857	0.94	0.7537
407	ANKRD26_KAN497-36_4.tif:0003-0347	0.839	943.663	0	3629	121.791	35.517	0.939	791.307	75493	1.152	0.868	0.947	1.49107
408	ANKRD26_KAN497-36_4.tif:0004-0507	0.755	847.236	0	3271	100.231	51.907	0.996	639.404	61001	1.272	0.786	0.96	1.20483
409	ANKRD26_KAN497-36_4.tif:0005-0551	0.87	604.253	0	2503	71.137	56.531	0.853	525.697	50153	1.091	0.917	0.883	0.990575
410	ANKRD26_KAN497-36_4.tif:0006-0575	0.776	708.351	0	1638	60.673	58.935	0.985	549.438	52418	1.079	0.927	0.961	1.03531
411	ANKRD26_KAN497-36_4.tif:0007-0587	0.692	777.53	0	2099	134.906	60.116	0.928	537.898	51317	1.249	0.801	0.964	1.01357
412	ANKRD26_KAN497-36_4.tif:0008-0699	0.629	708.417	48	2217	112.414	71.554	0.969	445.531	42505	1.075	0.931	0.968	0.839519
413	ANKRD26_KAN497-36_4.tif:0009-0812	0.692	936.576	0	3188	101.309	83.122	0.928	647.926	61814	1.208	0.828	0.957	1.22089
414	ANKRD26_KAN497-36_4.tif:0010-0907	0.639	706.246	9	2547	56.441	92.84	0.968	451.569	43081	1.201	0.833	0.938	0.850895
415	ANKRD26_KAN497-36_5.tif:0001-0163	0.776	561.676	5	1909	14.883	16.665	0.969	435.668	41564	1.284	0.779	0.943	0.820933
416	ANKRD26_KAN497-36_5.tif:0002-0232	0.922	777.295	0	3685	99.832	23.726	0.949	716.98	68402	1.099	0.91	0.946	1.35101
417	ANKRD26_KAN497-36_5.tif:0003-0335	0.66	634.444	0	2320	50.146	34.359	0.959	418.96	39970	1.393	0.718	0.955	0.78945
418	ANKRD26_KAN497-36_5.tif:0004-0820	0.807	772.169	0	3110	125.752	83.946	0.972	623.22	59457	1.193	0.838	0.945	1.17434
419	ANKRD26_KAN497-36_5.tif:0005-0906	0.639	544.492	19	1701	44.772	92.76	0.968	348.144	33214	1.115	0.897	0.931	0.656012
420	ANKRD26_KAN497-36_6.tif:0001-0132	0.996	907.011	0	3764	89.959	13.558	0.873	903.18	86166	1.548	0.646	0.936	1.70187
421	ANKRD26_KAN497-36_6.tif:0002-0137	0.891	699.518	0	2976	1.758	14.029	0.949	623.241	59459	1.016	0.984	0.934	1.17438
422	ANKRD26_KAN497-36_6.tif:0003-0150	0.839	474.337	0	1498	68.326	15.325	0.939	397.755	37947	1.103	0.906	0.952	0.749493
423	ANKRD26_KAN497-36_6.tif:0004-0239	0.849	810.802	0	3728	51.989	24.528	0.936	688.396	65675	1.45	0.69	0.947	1.29715
424	ANKRD26_KAN497-36_6.tif:0005-0311	0.954	555.703	0	2560	32.453	31.865	0.935	530.057	50569	1.387	0.721	0.933	0.998791
425	ANKRD26_KAN497-36_6.tif:0006-0464	0.88	731.762	0	3060	87.704	47.54	0.937	644.299	61468	1.265	0.79	0.933	1.21406
426	ANKRD26_KAN497-36_6.tif:0007-0627	0.713	435.103	0	1330	45.099	64.235	0.905	310.127	29587	1.272	0.786	0.925	0.584375
427	ANKRD26_KAN497-36_6.tif:0008-0673	0.723	717.406	0	2277	96.862	68.903	0.918	518.863	49501	1.466	0.682	0.952	0.977697
428	ANKRD26_KAN497-36_6.tif:0009-0859	0.786	478.32	0	1637	107.734	87.939	0.932	376.026	35874	1.394	0.717	0.909	0.708549
429	ANKRD26_KAN497-36_6.tif:0010-0914	0.901	556.395	0	1594	75.985	93.605	0.96	501.557	47850	1.229	0.814	0.95	0.945088
										53238.8				1.05152

## Sheet: IF condition
Exp. number	Cell line	Gene induced	Culture condition, fixation condition	rabbit-Alexa488	mouse IgG2a-Alexa568	mouse IgG2b-Alexa647	Nuclear stain	Date	Replicate
KAN497-31	RPE-BFP-Cas9 pMCB306 (pool)	Serum starved for 24 hours	Fixed in 4% PFA at RT for 15 minutes.	purified anti-Ankrd26 (M8, 1mg/ml)/1:500	CEP164, sc-515403, Santa Cruz, 1:500	FGFR1OP,H00011116-M01, 1:1000	DAPI	2019-05-20	No.3	ANKRD26: box-4, I3
KAN497-32	RPE-BFP-Cas9 CEP89KO (pool)	Serum starved for 24 hours	Fixed in 4% PFA at RT for 15 minutes.	purified anti-Ankrd26 (M8, 1mg/ml)/1:500	CEP164, sc-515403, Santa Cruz, 1:500	FGFR1OP,H00011116-M01, 1:1000	DAPI	2019-05-20	No.3
KAN497-33	RPE-BFP-Cas9 NCS1KO (pool)	Serum starved for 24 hours	Fixed in 4% PFA at RT for 15 minutes.	purified anti-Ankrd26 (M8, 1mg/ml)/1:500	CEP164, sc-515403, Santa Cruz, 1:500	FGFR1OP,H00011116-M01, 1:1000	DAPI	2019-05-20	No.3
KAN497-34	RPE-BFP-Cas9 C3orf14KO (pool)	Serum starved for 24 hours	Fixed in 4% PFA at RT for 15 minutes.	purified anti-Ankrd26 (M8, 1mg/ml)/1:500	CEP164, sc-515403, Santa Cruz, 1:500	FGFR1OP,H00011116-M01, 1:1000	DAPI	2019-05-20	No.3
KAN497-35	RPE-BFP-Cas9 Rab34KO (pool)	Serum starved for 24 hours	Fixed in 4% PFA at RT for 15 minutes.	purified anti-Ankrd26 (M8, 1mg/ml)/1:500	CEP164, sc-515403, Santa Cruz, 1:500	FGFR1OP,H00011116-M01, 1:1000	DAPI	2019-05-20	No.3
KAN497-36	RPE-BFP-Cas9 Myo5AKO (pool)	Serum starved for 24 hours	Fixed in 4% PFA at RT for 15 minutes.	purified anti-Ankrd26 (M8, 1mg/ml)/1:500	CEP164, sc-515403, Santa Cruz, 1:500	FGFR1OP,H00011116-M01, 1:1000	DAPI	2019-05-20	No.3
