# Supplementary material for: Myristoylated Neuronal Calcium Sensor-1 captures the preciliary vesicle at distal appendages
Source: eLife. 2025 Jan 30;14:e85998. doi: 10.7554/eLife.85998 (PMC11984960; doi:10.7554/eLife.85998)
Supplement: Figure 2—figure supplement 4—source data 4. [file elife-85998-fig2-figsupp4-data4.xlsx]

## Sheet: Raw data
	Label	Area	Mean	Min	Max	X	Y	Circ	IntDen	RawIntDen	AR	Round	Solidity
368	NCS1_KAN622-1_1.tif:0001-0103	1.241	49.632	0	384	19.627	7.505	0.766	61.601	11862	1.658	0.603	0.89
369	NCS1_KAN622-1_1.tif:0002-0261	1.085	77.522	0	617	38.558	18.794	0.78	84.139	16202	1.502	0.666	0.884
370	NCS1_KAN622-1_1.tif:0003-0372	0.654	6.175	0	42	87.798	26.769	0.725	4.04	778	2.408	0.415	0.944
371	NCS1_KAN622-1_1.tif:0004-0373	1.449	65.57	0	645	79.583	26.988	0.727	95.003	18294	1.634	0.612	0.86
372	NCS1_KAN622-1_1.tif:0005-0668	0.634	100.623	0	353	83.258	48.105	0.913	63.751	12276	1.141	0.877	0.938
373	NCS1_KAN622-1_1.tif:0006-0858	1.267	73.734	0	660	72.656	61.861	0.658	93.43	17991	2.192	0.456	0.844
374	NCS1_KAN622-1_1.tif:0007-0876	0.53	40.294	0	157	13.43	63.135	0.921	21.344	4110	1.32	0.758	0.976
375	NCS1_KAN622-1_2.tif:0001-0461	1.464	85.429	0	831	74.058	33.228	0.722	125.108	24091	1.952	0.512	0.887
376	NCS1_KAN622-1_2.tif:0002-0659	1.662	76.378	0	826	63.406	47.494	0.729	126.926	24441	1.613	0.62	0.86
377	NCS1_KAN622-1_2.tif:0003-0834	0.613	4.898	0	30	12.738	60.114	0.92	3.002	578	1.335	0.749	0.963
378	NCS1_KAN622-1_3.tif:0001-0111	1.298	54.396	0	347	39.116	7.949	0.78	70.622	13599	1.349	0.742	0.896
379	NCS1_KAN622-1_3.tif:0002-0412	1.028	63.52	0	480	3.555	29.645	0.823	65.314	12577	1.685	0.594	0.943
380	NCS1_KAN622-1_3.tif:0003-0664	1.35	71.542	0	569	64.599	47.978	0.818	96.598	18601	1.379	0.725	0.942
381	NCS1_KAN622-1_3.tif:0004-0891	0.789	34.921	0	135	82.559	64.249	0.911	27.565	5308	1.185	0.844	0.933
382	NCS1_KAN622-1_3.tif:0005-0968	0.758	38.445	0	137	25.768	69.794	0.862	29.149	5613	1.43	0.699	0.961
383	NCS1_KAN622-1_4.tif:0001-0024	0.68	53.023	0	252	27.032	1.735	0.953	36.072	6946	1.148	0.871	0.967
384	NCS1_KAN622-1_4.tif:0002-0178	1.007	89.119	0	709	58.186	12.848	0.861	89.784	17289	1.301	0.768	0.933
385	NCS1_KAN622-1_4.tif:0003-0186	0.872	109.708	0	586	43.553	13.463	0.902	95.715	18431	1.282	0.78	0.944
386	NCS1_KAN622-1_4.tif:0004-0200	1.413	152.026	0	1093	5.457	14.566	0.654	214.742	41351	1.646	0.607	0.827
387	NCS1_KAN622-1_4.tif:0005-0274	0.836	7.82	0	42	62.845	19.763	0.931	6.538	1259	1.233	0.811	0.953
388	NCS1_KAN622-1_4.tif:0006-0657	1.241	112.105	0	1021	57.378	47.357	0.867	139.14	26793	1.278	0.783	0.919
389	NCS1_KAN622-1_4.tif:0007-0691	1.174	75.261	0	634	7.3	49.773	0.819	88.33	17009	1.167	0.857	0.893
390	NCS1_KAN622-1_4.tif:0008-0952	0.966	101.511	0	728	37.679	68.618	0.933	98.052	18881	1.256	0.796	0.944
391	NCS1_KAN622-1_5.tif:0001-0147	0.763	18.367	0	171	69.606	10.581	0.938	14.021	2700	1.208	0.828	0.951
392	NCS1_KAN622-1_5.tif:0002-0351	0.857	30.382	0	155	26.965	25.287	0.798	26.033	5013	1.688	0.592	0.924
393	NCS1_KAN622-1_5.tif:0003-0411	1.22	51.306	0	386	70.219	29.679	0.797	62.614	12057	1.71	0.585	0.918
394	NCS1_KAN622-1_5.tif:0004-0508	0.914	105.102	0	608	46.506	36.631	0.913	96.063	18498	1.15	0.87	0.941
395	NCS1_KAN622-1_5.tif:0005-0681	0.878	67.604	0	463	43.345	49.087	0.92	59.332	11425	1.371	0.729	0.931
396	NCS1_KAN622-1_5.tif:0006-0749	1.236	58.744	0	503	19.91	53.97	0.757	72.605	13981	1.659	0.603	0.886
397	NCS1_KAN622-1_5.tif:0007-0975	0.67	101.256	0	404	33.873	70.248	0.878	67.833	13062	1.341	0.746	0.928
398	NCS1_KAN622-1_6.tif:0001-0015	1.059	90.221	0	645	73.847	1.111	0.905	95.58	18405	1.316	0.76	0.953
399	NCS1_KAN622-1_6.tif:0002-0058	0.971	83.043	0	577	83.775	4.161	0.822	80.644	15529	1.643	0.608	0.91
400	NCS1_KAN622-1_6.tif:0003-0234	1.101	70.014	0	551	44.785	16.888	0.841	77.082	14843	1.282	0.78	0.889
401	NCS1_KAN622-1_6.tif:0004-0258	1.054	65.113	0	470	78.463	18.563	0.921	68.643	13218	1.054	0.949	0.94
402	NCS1_KAN622-1_6.tif:0005-0406	0.789	93.658	0	394	23.597	29.26	0.934	73.93	14236	1.361	0.735	0.95
403	NCS1_KAN622-1_6.tif:0006-0573	0.971	103.182	0	780	49.458	41.286	0.905	100.202	19295	1.243	0.804	0.954
404	NCS1_KAN622-1_6.tif:0007-0680	1.127	58.295	0	395	6.885	48.951	0.75	65.693	12650	1.532	0.653	0.858
405	NCS1_KAN622-1_6.tif:0008-0887	0.571	29.155	0	108	70.517	63.975	0.8	16.654	3207	1.79	0.559	0.909
406	NCS1_KAN622-1_6.tif:0009-0947	0.644	104.556	0	558	17.404	68.22	0.902	67.329	12965	1.226	0.816	0.932
										13727.3
407	NCS1_KAN622-2_1.tif:0001-0093	0.727	6.921	0	39	1.093	6.716	0.839	5.032	969	1.572	0.636	0.918
408	NCS1_KAN622-2_1.tif:0002-0129	0.987	37.537	0	235	63.601	9.293	0.923	37.038	7132	1.247	0.802	0.934
409	NCS1_KAN622-2_1.tif:0003-0509	1.293	51.707	0	436	43.931	36.75	0.723	66.862	12875	2.003	0.499	0.891
410	NCS1_KAN622-2_1.tif:0004-0602	0.971	86.326	0	670	53.303	43.402	0.876	83.833	16143	1.411	0.709	0.942
411	NCS1_KAN622-2_1.tif:0005-0650	1.153	8.149	0	41	49.923	46.812	0.855	9.394	1809	1.535	0.652	0.908
412	NCS1_KAN622-2_1.tif:0006-0683	0.8	8.825	0	43	31.731	49.203	0.868	7.057	1359	1.438	0.695	0.922
413	NCS1_KAN622-2_1.tif:0007-0780	0.654	6.579	0	41	76.796	56.183	0.932	4.305	829	1.043	0.959	0.926
414	NCS1_KAN622-2_1.tif:0008-0787	0.654	7.77	0	42	81.131	56.735	0.679	5.084	979	2.66	0.376	0.837
415	NCS1_KAN622-2_1.tif:0009-0855	0.587	36.947	0	278	34.21	61.626	0.908	21.681	4175	1.322	0.756	0.942
416	NCS1_KAN622-2_2.tif:0001-0074	1.293	97.382	0	973	28.269	5.365	0.845	125.923	24248	1.42	0.704	0.915
417	NCS1_KAN622-2_2.tif:0002-0262	0.779	24.427	0	266	5.087	18.862	0.867	19.028	3664	1.436	0.697	0.904
418	NCS1_KAN622-2_2.tif:0003-0355	1.241	46.289	0	500	82.985	25.675	0.689	57.452	11063	1.717	0.582	0.851
419	NCS1_KAN622-2_2.tif:0004-0489	1.153	52.104	0	415	59.235	35.218	0.733	60.069	11567	1.892	0.529	0.869
420	NCS1_KAN622-2_2.tif:0005-0516	0.893	44.587	0	297	16.673	37.202	0.872	39.826	7669	1.121	0.892	0.922
421	NCS1_KAN622-2_2.tif:0006-0680	0.909	10.143	0	40	69.024	49.004	0.887	9.218	1775	1.317	0.759	0.941
422	NCS1_KAN622-2_2.tif:0007-0748	0.784	54.033	0	343	8.886	53.901	0.851	42.371	8159	1.439	0.695	0.907
423	NCS1_KAN622-2_2.tif:0008-0782	0.997	4.115	0	28	72.25	56.355	0.911	4.103	790	1.15	0.87	0.93
424	NCS1_KAN622-2_3.tif:0001-0126	0.81	6.269	0	29	51.434	9.038	0.798	5.079	978	1.124	0.89	0.902
425	NCS1_KAN622-2_3.tif:0002-0241	0.872	32.917	0	165	12.266	17.392	0.893	28.718	5530	1.186	0.843	0.931
426	NCS1_KAN622-2_3.tif:0003-0298	1.08	31.413	0	286	84.298	21.486	0.906	33.932	6534	1.221	0.819	0.918
427	NCS1_KAN622-2_3.tif:0004-0571	1.184	64.425	0	451	46.114	41.103	0.765	76.282	14689	1.586	0.631	0.903
428	NCS1_KAN622-2_3.tif:0005-0614	0.872	22.768	0	245	24.648	44.261	0.824	19.864	3825	1.217	0.822	0.891
429	NCS1_KAN622-2_3.tif:0006-0809	1.397	52.074	0	554	59.459	58.301	0.783	72.746	14008	1.672	0.598	0.889
430	NCS1_KAN622-2_4.tif:0001-0028	0.976	11.074	0	135	34.414	2.025	0.913	10.812	2082	1.251	0.799	0.935
431	NCS1_KAN622-2_4.tif:0002-0233	0.841	10.975	0	90	54.037	16.805	0.96	9.233	1778	1.215	0.823	0.942
432	NCS1_KAN622-2_4.tif:0003-0287	0.826	48.314	0	274	14.717	20.755	0.896	39.894	7682	1.288	0.776	0.924
433	NCS1_KAN622-2_4.tif:0004-0370	0.821	10.215	0	113	82.322	26.617	0.869	8.382	1614	1.097	0.911	0.916
434	NCS1_KAN622-2_4.tif:0005-0558	0.821	9.266	0	43	9.866	40.212	0.913	7.603	1464	1.438	0.696	0.94
435	NCS1_KAN622-2_4.tif:0006-0742	0.898	38.642	0	258	39.077	53.468	0.848	34.716	6685	1.593	0.628	0.92
436	NCS1_KAN622-2_4.tif:0007-0834	0.935	11.344	0	117	3.609	60.049	0.874	10.604	2042	1.204	0.831	0.916
437	NCS1_KAN622-2_5.tif:0001-0078	0.582	7.911	0	39	26.081	5.633	0.815	4.601	886	1.678	0.596	0.922
438	NCS1_KAN622-2_5.tif:0002-0115	0.857	32.685	0	149	80.683	8.294	0.954	28.007	5393	1.156	0.865	0.948
439	NCS1_KAN622-2_5.tif:0003-0163	0.966	65.247	0	473	26.635	11.823	0.891	63.024	12136	1.273	0.785	0.939
440	NCS1_KAN622-2_5.tif:0004-0371	0.815	27.153	0	128	61.363	26.746	0.894	22.138	4263	1.465	0.682	0.957
441	NCS1_KAN622-2_5.tif:0005-0750	0.748	99.382	0	456	47.47	54.045	0.929	74.319	14311	1.078	0.928	0.966
442	NCS1_KAN622-2_5.tif:0006-0797	0.826	36.289	0	170	22.811	57.436	0.906	29.964	5770	1.216	0.822	0.949
443	NCS1_KAN622-2_6.tif:0001-0087	1.018	25.474	0	142	77.529	6.213	0.777	25.929	4993	1.663	0.601	0.885
444	NCS1_KAN622-2_6.tif:0002-0152	0.732	43.525	0	226	46.13	10.986	0.934	31.87	6137	1.249	0.801	0.966
445	NCS1_KAN622-2_6.tif:0003-0421	0.582	22.795	0	125	35.6	30.37	0.899	13.258	2553	1.185	0.844	0.926
446	NCS1_KAN622-2_6.tif:0004-0610	0.665	6.406	0	60	59.966	43.98	0.895	4.258	820	1.231	0.813	0.921
447	NCS1_KAN622-2_6.tif:0005-0708	0.774	6.154	0	27	9.98	50.977	0.861	4.762	917	1.351	0.74	0.928
448	NCS1_KAN622-2_6.tif:0006-0971	0.68	4.985	0	40	64.62	70.058	0.868	3.391	653	1.272	0.786	0.956
										5784.48
449	NCS1_KAN622-3_1.tif:0001-0074	0.846	6.485	0	51	45.253	5.401	0.875	5.489	1057	1.155	0.866	0.934
450	NCS1_KAN622-3_1.tif:0002-0264	1.007	4.753	0	28	64.222	19.036	0.835	4.788	922	1.625	0.615	0.904
451	NCS1_KAN622-3_1.tif:0003-0278	1.091	4.786	0	31	89.857	20.011	0.848	5.219	1005	1.232	0.812	0.925
452	NCS1_KAN622-3_1.tif:0004-0562	0.872	27.78	0	296	46.718	40.482	0.824	24.236	4667	1.164	0.859	0.877
453	NCS1_KAN622-3_1.tif:0005-0585	0.857	8.206	0	68	5.917	42.153	0.898	7.032	1354	1.171	0.854	0.912
454	NCS1_KAN622-3_1.tif:0006-0691	0.888	5.877	0	37	71.444	49.822	0.783	5.219	1005	1.311	0.763	0.902
455	NCS1_KAN622-3_1.tif:0007-0740	0.556	6.28	0	28	52.69	53.383	0.662	3.49	672	2.708	0.369	0.947
456	NCS1_KAN622-3_1.tif:0008-0784	0.592	4.877	0	45	54.228	56.498	0.943	2.887	556	1.293	0.773	0.95
457	NCS1_KAN622-3_1.tif:0009-0941	0.857	4.655	0	32	45.916	67.779	0.798	3.988	768	1.327	0.753	0.902
458	NCS1_KAN622-3_1.tif:0010-0971	0.634	5.131	0	25	14.956	70.038	0.94	3.251	626	1.202	0.832	0.942
459	NCS1_KAN622-3_2.tif:0001-0036	0.924	8.169	0	76	79.322	2.573	0.902	7.551	1454	1.344	0.744	0.949
460	NCS1_KAN622-3_2.tif:0002-0356	0.597	42.826	0	188	43.591	25.676	0.861	25.576	4925	1.236	0.809	0.898
461	NCS1_KAN622-3_2.tif:0003-0435	1.148	31.176	0	325	84.929	31.312	0.834	35.781	6890	1.438	0.696	0.908
462	NCS1_KAN622-3_2.tif:0004-0545	0.852	16.665	0	131	32.005	39.29	0.902	14.193	2733	1.372	0.729	0.948
463	NCS1_KAN622-3_2.tif:0005-0920	0.748	34.562	0	203	68.552	66.341	0.872	25.846	4977	1.473	0.679	0.938
464	NCS1_KAN622-3_2.tif:0006-0940	0.846	24.939	0	132	38.945	67.757	0.875	21.11	4065	1.193	0.839	0.937
465	NCS1_KAN622-3_3.tif:0001-0206	0.717	3.413	0	21	48.955	14.918	0.904	2.446	471	1.044	0.958	0.923
466	NCS1_KAN622-3_3.tif:0002-0272	0.893	4.087	0	21	84.113	19.611	0.923	3.651	703	1.227	0.815	0.956
467	NCS1_KAN622-3_3.tif:0003-0316	0.743	3.413	0	15	8.525	22.854	0.815	2.534	488	1.578	0.634	0.92
468	NCS1_KAN622-3_3.tif:0004-0484	1.605	44.359	0	475	66.088	34.829	0.708	71.182	13707	1.264	0.791	0.844
469	NCS1_KAN622-3_3.tif:0005-0554	0.878	5.485	0	34	81.32	39.956	0.865	4.814	927	1.302	0.768	0.949
470	NCS1_KAN622-3_3.tif:0006-0851	0.639	7.537	0	51	21.315	61.369	0.87	4.814	927	1.295	0.772	0.932
471	NCS1_KAN622-3_4.tif:0001-0093	0.737	5.408	0	27	53.938	6.706	0.755	3.988	768	1.88	0.532	0.871
472	NCS1_KAN622-3_4.tif:0002-0242	0.8	18.916	0	138	88.756	17.423	0.923	15.128	2913	1.227	0.815	0.936
473	NCS1_KAN622-3_4.tif:0003-0258	0.81	4.853	0	21	35.544	18.609	0.925	3.931	757	1.335	0.749	0.94
474	NCS1_KAN622-3_4.tif:0004-0456	0.649	11.712	0	46	43.452	32.87	0.884	7.603	1464	1.389	0.72	0.951
475	NCS1_KAN622-3_4.tif:0005-0505	0.68	15.557	0	138	66.558	36.402	0.916	10.584	2038	1.307	0.765	0.939
476	NCS1_KAN622-3_4.tif:0006-0758	0.805	3.381	0	16	31.317	54.64	0.929	2.721	524	1.357	0.737	0.948
477	NCS1_KAN622-3_4.tif:0007-0909	0.644	54.306	0	217	58.978	65.537	0.844	34.971	6734	1.384	0.722	0.902
478	NCS1_KAN622-3_4.tif:0008-0927	0.55	5.906	0	60	52.515	66.755	0.73	3.251	626	1.442	0.693	0.865
479	NCS1_KAN622-3_5.tif:0001-0030	0.717	27.841	0	144	90.372	2.237	0.918	19.952	3842	1.077	0.928	0.905
480	NCS1_KAN622-3_5.tif:0002-0096	0.53	9.961	0	60	53.465	6.898	0.909	5.276	1016	1.233	0.811	0.936
481	NCS1_KAN622-3_5.tif:0003-0295	0.665	12.32	0	64	35.06	21.269	0.895	8.19	1577	1.337	0.748	0.931
482	NCS1_KAN622-3_5.tif:0004-0296	0.67	18.791	0	242	66.9	21.354	0.878	12.588	2424	1.317	0.759	0.918
483	NCS1_KAN622-3_5.tif:0005-0409	0.753	4.4	0	27	60.424	29.462	0.891	3.313	638	1.453	0.688	0.935
484	NCS1_KAN622-3_5.tif:0006-0474	0.691	21.602	0	107	7.394	34.119	0.848	14.92	2873	1.282	0.78	0.902
485	NCS1_KAN622-3_5.tif:0007-0667	0.862	4.373	0	22	27.477	48.109	0.873	3.77	726	1.377	0.726	0.905
486	NCS1_KAN622-3_5.tif:0008-0674	0.763	7.884	0	39	87.701	48.574	0.913	6.019	1159	1.224	0.817	0.948
487	NCS1_KAN622-3_5.tif:0009-0816	0.831	5.744	0	31	56.341	58.878	0.925	4.773	919	1.2	0.833	0.944
488	NCS1_KAN622-3_5.tif:0010-0889	0.654	13.468	0	79	57.982	64.138	0.804	8.813	1697	1.444	0.692	0.884
489	NCS1_KAN622-3_5.tif:0011-0918	0.821	26.506	0	228	76.984	66.174	0.869	21.749	4188	1.301	0.768	0.921
490	NCS1_KAN622-3_5.tif:0012-1015	0.597	6.183	0	35	70.272	73.119	0.886	3.692	711	1.459	0.685	0.931
491	NCS1_KAN622-3_6.tif:0001-0250	0.872	9.518	0	64	29.013	18.058	0.937	8.304	1599	1.235	0.81	0.941
492	NCS1_KAN622-3_6.tif:0002-0260	0.639	3.276	0	22	6.84	18.706	0.764	2.093	403	1.485	0.673	0.872
493	NCS1_KAN622-3_6.tif:0003-0264	0.94	4.354	0	38	52.949	19.056	0.921	4.092	788	1.288	0.776	0.926
494	NCS1_KAN622-3_6.tif:0004-0393	0.826	7.679	0	68	86.634	28.341	0.845	6.341	1221	1.548	0.646	0.914
495	NCS1_KAN622-3_6.tif:0005-0683	0.696	7.06	0	64	79.205	49.26	0.912	4.913	946	1.336	0.749	0.957
496	NCS1_KAN622-3_6.tif:0006-0718	0.893	12.541	0	140	46.191	51.745	0.843	11.202	2157	1.137	0.88	0.91
497	NCS1_KAN622-3_6.tif:0007-0973	0.525	5.327	0	34	65.874	70.101	0.821	2.794	538	1.834	0.545	0.948
										2043.78
498	NCS1_KAN622-4_1.tif:0001-0041	0.95	5.093	0	26	2.933	3.031	0.869	4.84	932	1.123	0.891	0.915
499	NCS1_KAN622-4_1.tif:0002-0082	1.039	4.655	0	27	44.966	5.901	0.827	4.835	931	1.562	0.64	0.897
500	NCS1_KAN622-4_1.tif:0003-0247	1.106	35.906	0	257	5.446	17.895	0.788	39.717	7648	1.418	0.705	0.884
501	NCS1_KAN622-4_1.tif:0004-0338	1.013	86.959	0	560	26.871	24.352	0.913	88.06	16957	1.35	0.741	0.961
502	NCS1_KAN622-4_1.tif:0005-0362	0.758	5.014	0	31	30.506	26.107	0.884	3.801	732	1.411	0.709	0.948
503	NCS1_KAN622-4_1.tif:0006-0371	1.142	56.041	0	427	81.36	26.734	0.837	64.026	12329	1.308	0.765	0.896
504	NCS1_KAN622-4_1.tif:0007-0644	0.836	7.957	0	45	66.995	46.446	0.954	6.652	1281	1.136	0.88	0.947
505	NCS1_KAN622-4_1.tif:0008-0668	1.049	34.688	0	277	87.996	48.182	0.869	36.388	7007	1.323	0.756	0.929
506	NCS1_KAN622-4_1.tif:0009-0986	0.987	9.616	0	107	30.267	71.053	0.91	9.488	1827	1.282	0.78	0.948
507	NCS1_KAN622-4_2.tif:0001-0118	0.976	11.165	0	120	72.181	8.445	0.88	10.9	2099	1.29	0.775	0.949
508	NCS1_KAN622-4_2.tif:0002-0144	1.028	45.667	0	372	17.991	10.369	0.871	46.956	9042	1.325	0.755	0.921
509	NCS1_KAN622-4_2.tif:0003-0465	0.935	13.967	0	155	82.87	33.557	0.862	13.056	2514	1.073	0.932	0.918
510	NCS1_KAN622-4_2.tif:0004-0481	0.94	16.718	0	154	14.949	34.693	0.93	15.714	3026	1.025	0.976	0.921
511	NCS1_KAN622-4_2.tif:0005-0905	0.898	13.688	0	96	62.783	65.237	0.877	12.297	2368	1.578	0.634	0.948
512	NCS1_KAN622-4_2.tif:0006-0917	0.987	6.368	0	43	23.226	66.143	0.862	6.284	1210	1.382	0.723	0.927
513	NCS1_KAN622-4_3.tif:0001-0215	0.961	26.541	0	276	80.419	15.512	0.898	25.498	4910	1.407	0.711	0.93
514	NCS1_KAN622-4_3.tif:0002-0235	0.904	46.782	0	324	51.914	16.925	0.894	42.272	8140	1.132	0.883	0.921
515	NCS1_KAN622-4_3.tif:0003-0412	0.872	32.774	0	200	46.607	29.736	0.915	28.593	5506	1.451	0.689	0.944
516	NCS1_KAN622-4_3.tif:0004-0441	1.028	28.616	0	190	67.261	31.77	0.863	29.424	5666	1.274	0.785	0.896
517	NCS1_KAN622-4_3.tif:0005-0575	0.95	9.945	0	97	85.203	41.483	0.877	9.452	1820	1.373	0.728	0.929
518	NCS1_KAN622-4_3.tif:0006-0733	0.706	8.735	0	50	18.438	52.877	0.845	6.169	1188	1.384	0.722	0.928
519	NCS1_KAN622-4_3.tif:0007-0892	0.717	27.406	0	166	2.707	64.312	0.929	19.64	3782	1.236	0.809	0.923
520	NCS1_KAN622-4_3.tif:0008-0922	0.789	135.204	0	722	39.754	66.463	0.92	106.724	20551	1.149	0.87	0.959
521	NCS1_KAN622-4_4.tif:0001-0068	0.914	37.716	0	344	49.167	4.96	0.757	34.472	6638	1.382	0.723	0.861
522	NCS1_KAN622-4_4.tif:0002-0090	0.841	8.13	0	47	15.309	6.468	0.936	6.839	1317	1.28	0.781	0.942
523	NCS1_KAN622-4_4.tif:0003-0136	0.841	29.494	0	204	82.239	9.788	0.9	24.813	4778	1.118	0.894	0.953
524	NCS1_KAN622-4_4.tif:0004-0288	0.561	33.444	0	243	91.746	20.748	0.828	18.758	3612	1.763	0.567	0.982
525	NCS1_KAN622-4_4.tif:0005-0364	0.805	8.761	0	50	37.911	26.236	0.905	7.052	1358	1.273	0.786	0.942
526	NCS1_KAN622-4_4.tif:0006-0447	0.608	10.427	0	70	9.529	32.223	0.866	6.336	1220	1.487	0.672	0.907
527	NCS1_KAN622-4_4.tif:0007-0585	0.867	7.341	0	36	68.697	42.121	0.855	6.367	1226	1.505	0.665	0.941
528	NCS1_KAN622-4_4.tif:0008-0691	1.361	99.275	0	860	7.049	49.786	0.797	135.074	26010	1.479	0.676	0.9
529	NCS1_KAN622-4_4.tif:0009-0826	0.753	43.786	0	268	58.801	59.567	0.869	32.971	6349	1.208	0.828	0.915
530	NCS1_KAN622-4_4.tif:0010-0845	0.893	101.017	0	632	33.715	60.901	0.851	90.231	17375	1.522	0.657	0.942
531	NCS1_KAN622-4_5.tif:0001-0014	0.587	7.354	0	41	26.891	0.956	0.721	4.316	831	1.827	0.547	0.846
532	NCS1_KAN622-4_5.tif:0002-0061	0.592	11.57	0	44	28.349	4.426	0.716	6.85	1319	2.015	0.496	0.894
533	NCS1_KAN622-4_5.tif:0003-0143	0.66	5.118	0	29	17.198	10.323	0.706	3.376	650	2.101	0.476	0.852
534	NCS1_KAN622-4_5.tif:0004-0150	0.81	6.083	0	27	24.53	10.797	0.935	4.928	949	1.131	0.884	0.948
535	NCS1_KAN622-4_5.tif:0005-0271	0.81	8.494	0	85	62.265	19.543	0.911	6.881	1325	1.096	0.913	0.94
536	NCS1_KAN622-4_5.tif:0006-0284	1.013	24.031	0	289	80.878	20.431	0.885	24.335	4686	1.453	0.688	0.944
537	NCS1_KAN622-4_5.tif:0007-0372	0.665	28.188	0	137	3.204	26.815	0.947	18.737	3608	1.218	0.821	0.938
538	NCS1_KAN622-4_5.tif:0008-0401	0.67	20.31	0	148	38.135	28.925	0.902	13.606	2620	1.258	0.795	0.931
539	NCS1_KAN622-4_5.tif:0009-0707	1.033	36.422	0	223	76.838	50.966	0.895	37.64	7248	1.105	0.905	0.923
540	NCS1_KAN622-4_5.tif:0010-0781	0.763	3.646	0	25	32.69	56.31	0.881	2.784	536	1.253	0.798	0.925
541	NCS1_KAN622-4_5.tif:0011-0830	0.945	15.209	0	201	68.014	59.839	0.826	14.375	2768	1.648	0.607	0.919
542	NCS1_KAN622-4_6.tif:0001-0072	0.743	8.441	0	47	4.112	5.19	0.937	6.268	1207	1.191	0.84	0.938
543	NCS1_KAN622-4_6.tif:0002-0098	1.303	102.526	0	746	79.415	7.093	0.829	133.64	25734	1.493	0.67	0.921
544	NCS1_KAN622-4_6.tif:0003-0145	0.878	26.704	0	117	38.283	10.468	0.967	23.437	4513	1.075	0.93	0.936
545	NCS1_KAN622-4_6.tif:0004-0262	0.556	84.383	0	315	31.826	18.903	0.953	46.889	9029	1.049	0.953	0.947
546	NCS1_KAN622-4_6.tif:0005-0734	0.924	30.056	0	167	5.253	52.865	0.915	27.783	5350	1.185	0.844	0.922
547	NCS1_KAN622-4_6.tif:0006-0845	0.852	14.951	0	155	45.057	60.943	0.859	12.734	2452	1.596	0.627	0.948
548	NCS1_KAN622-4_6.tif:0007-0870	0.826	19.642	0	107	82.226	62.724	0.953	16.218	3123	1.094	0.914	0.949
549	NCS1_KAN622-4_6.tif:0008-0894	0.862	89.801	0	420	14.212	64.422	0.87	77.414	14907	1.156	0.865	0.941
										5465.46
550	NCS1_KAN622-5_1.tif:0001-0462	0.815	90.783	0	504	36.497	33.353	0.796	74.018	14253	1.387	0.721	0.902
551	NCS1_KAN622-5_1.tif:0002-0824	1.018	72.612	0	555	44.862	59.374	0.702	73.909	14232	2.014	0.497	0.885
552	NCS1_KAN622-5_1.tif:0003-0934	1.07	62.272	0	466	62.225	67.307	0.775	66.618	12828	1.213	0.825	0.892
553	NCS1_KAN622-5_2.tif:0001-0090	1.085	87.761	0	744	13.221	6.48	0.826	95.253	18342	1.464	0.683	0.931
554	NCS1_KAN622-5_2.tif:0002-0604	1.065	81.371	0	676	49.068	43.478	0.845	86.627	16681	1.153	0.867	0.915
555	NCS1_KAN622-5_2.tif:0003-0839	0.976	73.564	0	526	36.135	60.452	0.909	71.821	13830	1.011	0.989	0.952
556	NCS1_KAN622-5_3.tif:0001-0110	0.753	55.393	0	253	54.862	7.96	0.778	41.711	8032	1.285	0.778	0.876
557	NCS1_KAN622-5_3.tif:0002-0119	1.241	94.301	0	572	36.77	8.54	0.833	117.043	22538	1.439	0.695	0.925
558	NCS1_KAN622-5_3.tif:0003-0209	0.582	4.902	0	27	8.981	15.122	0.927	2.851	549	1.162	0.861	0.937
559	NCS1_KAN622-5_3.tif:0004-0266	0.909	143.251	0	1085	86.141	19.19	0.82	130.187	25069	1.242	0.805	0.893
560	NCS1_KAN622-5_3.tif:0005-0548	1.293	59.783	0	533	17.374	39.566	0.698	77.305	14886	1.286	0.778	0.86
561	NCS1_KAN622-5_4.tif:0001-0068	1.226	112.504	0	1033	50.633	4.911	0.734	137.883	26551	2.098	0.477	0.937
562	NCS1_KAN622-5_4.tif:0002-0145	1.298	102.06	0	876	8.964	10.483	0.792	132.503	25515	1.855	0.539	0.942
563	NCS1_KAN622-5_4.tif:0003-0332	1.371	77.697	0	713	28.665	23.903	0.83	106.522	20512	1.622	0.617	0.943
564	NCS1_KAN622-5_4.tif:0004-0546	0.587	16.664	0	119	58.408	39.348	0.908	9.779	1883	1.303	0.768	0.946
565	NCS1_KAN622-5_4.tif:0005-0798	0.997	8.365	0	46	80.266	57.58	0.911	8.34	1606	1.278	0.782	0.943
566	NCS1_KAN622-5_4.tif:0006-0951	0.924	38.208	0	293	61.684	68.533	0.893	35.319	6801	1.315	0.76	0.937
567	NCS1_KAN622-5_5.tif:0001-0124	1.236	75.849	0	715	71.982	8.901	0.798	93.747	18052	1.782	0.561	0.937
568	NCS1_KAN622-5_5.tif:0002-0282	0.566	219.22	0	955	0.728	20.325	0.913	124.09	23895	1.259	0.794	0.96
569	NCS1_KAN622-5_5.tif:0003-0341	0.971	65.829	0	326	35.741	24.627	0.929	63.928	12310	1.183	0.845	0.926
570	NCS1_KAN622-5_5.tif:0004-0595	1.018	111.781	0	590	68.682	42.867	0.825	113.777	21909	1.485	0.673	0.91
571	NCS1_KAN622-5_5.tif:0005-0904	1.142	106.291	0	922	68.382	65.184	0.795	121.437	23384	1.39	0.719	0.905
572	NCS1_KAN622-5_5.tif:0006-0979	0.945	48.198	0	390	41.456	70.548	0.826	45.554	8772	1.19	0.84	0.901
573	NCS1_KAN622-5_6.tif:0001-0078	1.091	71.786	0	621	60.039	5.668	0.823	78.287	15075	1.226	0.816	0.903
574	NCS1_KAN622-5_6.tif:0002-0204	1.22	61.774	0	418	15.969	14.659	0.803	75.389	14517	1.21	0.826	0.916
575	NCS1_KAN622-5_6.tif:0003-0367	0.836	60.764	0	374	59.314	26.431	0.844	50.805	9783	1.492	0.67	0.936
576	NCS1_KAN622-5_6.tif:0004-0464	1.091	64.686	0	600	31.801	33.413	0.753	70.544	13584	1.792	0.558	0.892
577	NCS1_KAN622-5_6.tif:0005-0530	0.737	57.754	0	315	17.056	38.258	0.86	42.589	8201	1.437	0.696	0.937
578	NCS1_KAN622-5_6.tif:0006-0850	0.971	70.583	0	492	22.56	61.288	0.812	68.544	13199	1.465	0.682	0.908
										14716.9
579	NCS1_KAN622-6_1.tif:0001-0277	0.753	3.221	0	18	11.712	20.013	0.798	2.425	467	1.824	0.548	0.903
580	NCS1_KAN622-6_1.tif:0002-0465	0.758	3.938	0	19	31.335	33.524	0.956	2.986	575	1.163	0.86	0.954
581	NCS1_KAN622-6_1.tif:0003-0477	0.815	4.58	0	18	68.391	34.347	0.826	3.734	719	1.565	0.639	0.895
582	NCS1_KAN622-6_1.tif:0004-0481	0.878	5.391	0	30	54.686	34.686	0.829	4.731	911	1.382	0.724	0.909
583	NCS1_KAN622-6_1.tif:0005-0490	0.821	3.741	0	17	8.717	35.338	0.891	3.069	591	1.279	0.782	0.932
584	NCS1_KAN622-6_1.tif:0006-0758	0.748	3.451	0	18	61.251	54.62	0.943	2.581	497	1.224	0.817	0.947
585	NCS1_KAN622-6_1.tif:0007-0847	0.982	3.63	0	16	51.608	61.011	0.779	3.562	686	1.218	0.821	0.881
586	NCS1_KAN622-6_1.tif:0008-0909	0.685	6.227	0	34	21.561	65.542	0.898	4.269	822	1.255	0.797	0.936
587	NCS1_KAN622-6_2.tif:0001-0028	0.935	3.567	0	17	66.865	2.025	0.891	3.334	642	1.261	0.793	0.945
588	NCS1_KAN622-6_2.tif:0002-0028	0.862	3.765	0	19	21.102	2.059	0.936	3.246	625	1.187	0.843	0.943
589	NCS1_KAN622-6_2.tif:0003-0157	0.987	4.653	0	43	83.044	11.312	0.843	4.591	884	1.548	0.646	0.925
590	NCS1_KAN622-6_2.tif:0004-0189	0.94	4.392	0	21	45.238	13.642	0.879	4.129	795	1.494	0.669	0.931
591	NCS1_KAN622-6_2.tif:0005-0463	0.763	3.789	0	22	36.546	33.396	0.85	2.893	557	1.602	0.624	0.91
592	NCS1_KAN622-6_2.tif:0006-0787	0.717	3.203	0	15	22.82	56.663	0.683	2.295	442	1.098	0.911	0.809
593	NCS1_KAN622-6_2.tif:0007-0889	1.153	5.149	0	34	74.136	63.995	0.863	5.936	1143	1.233	0.811	0.923
594	NCS1_KAN622-6_2.tif:0008-0932	0.774	3.497	0	18	26.493	67.23	0.926	2.706	521	1.073	0.932	0.958
595	NCS1_KAN622-6_3.tif:0001-0042	0.67	3.868	0	18	70.664	3.098	0.845	2.591	499	1.532	0.653	0.905
596	NCS1_KAN622-6_3.tif:0002-0140	0.987	4.342	0	37	77.313	10.09	0.793	4.284	825	1.388	0.721	0.878
597	NCS1_KAN622-6_3.tif:0003-0424	0.602	3.474	0	16	38.833	30.539	0.868	2.093	403	1.524	0.656	0.928
598	NCS1_KAN622-6_3.tif:0004-0424	0.665	4.055	0	18	57.544	30.565	0.921	2.695	519	1.38	0.725	0.931
599	NCS1_KAN622-6_3.tif:0005-0516	0.909	4.137	0	23	84.482	37.207	0.875	3.76	724	1.267	0.789	0.956
600	NCS1_KAN622-6_3.tif:0006-0867	0.815	4.146	0	19	12.671	62.479	0.851	3.381	651	1.256	0.796	0.94
601	NCS1_KAN622-6_3.tif:0007-0872	0.904	5.006	0	34	40.07	62.841	0.861	4.523	871	1.471	0.68	0.948
602	NCS1_KAN622-6_4.tif:0001-0057	0.649	4.144	0	17	68.59	4.11	0.828	2.69	518	1.375	0.727	0.906
603	NCS1_KAN622-6_4.tif:0002-0143	0.956	4.038	0	22	22.623	10.329	0.885	3.859	743	1.322	0.756	0.909
604	NCS1_KAN622-6_4.tif:0003-0194	0.608	5.65	0	31	85.659	13.96	0.851	3.433	661	1.454	0.688	0.936
605	NCS1_KAN622-6_4.tif:0004-0210	0.722	3.719	0	18	41.911	15.172	0.961	2.685	517	1.189	0.841	0.939
606	NCS1_KAN622-6_4.tif:0005-0329	0.893	3.384	0	17	10.218	23.677	0.851	3.022	582	1.482	0.675	0.942
607	NCS1_KAN622-6_4.tif:0006-0474	0.608	6.701	0	53	32.211	34.196	0.912	4.071	784	1.39	0.72	0.967
608	NCS1_KAN622-6_4.tif:0007-0606	0.914	4.131	0	25	43.422	43.695	0.913	3.775	727	1.113	0.899	0.946
609	NCS1_KAN622-6_4.tif:0008-0780	0.753	4.379	0	27	80.498	56.197	0.782	3.298	635	1.926	0.519	0.884
610	NCS1_KAN622-6_4.tif:0009-0919	0.613	5.017	0	30	56.498	66.239	0.964	3.074	592	1.341	0.746	0.948
611	NCS1_KAN622-6_4.tif:0010-0920	0.769	4.568	0	23	72.533	66.335	0.896	3.511	676	1.211	0.826	0.946
612	NCS1_KAN622-6_4.tif:0011-0961	0.737	3.93	0	17	21.733	69.297	0.882	2.898	558	1.43	0.699	0.934
613	NCS1_KAN622-6_5.tif:0001-0118	0.81	4.205	0	22	6.648	8.488	0.902	3.407	656	1.184	0.845	0.918
614	NCS1_KAN622-6_5.tif:0002-0456	0.795	3.268	0	17	63.091	32.945	0.884	2.597	500	1.221	0.819	0.916
615	NCS1_KAN622-6_5.tif:0003-0659	0.654	4.119	0	18	73.989	47.49	0.928	2.695	519	1.092	0.916	0.984
616	NCS1_KAN622-6_5.tif:0004-0677	0.81	3.936	0	19	24.079	48.88	0.879	3.189	614	1.184	0.844	0.92
617	NCS1_KAN622-6_5.tif:0005-0801	1.028	4.025	0	22	86.293	57.749	0.826	4.139	797	1.501	0.666	0.906
618	NCS1_KAN622-6_5.tif:0006-0817	0.8	3.513	0	15	74.352	58.944	0.807	2.809	541	1.442	0.694	0.914
619	NCS1_KAN622-6_5.tif:0007-0827	0.634	3.418	0	19	5.06	59.609	0.808	2.166	417	1.729	0.578	0.907
620	NCS1_KAN622-6_6.tif:0001-0422	0.883	4.159	0	19	80.672	30.458	0.916	3.672	707	1.299	0.77	0.916
621	NCS1_KAN622-6_6.tif:0002-0600	0.826	4.717	0	22	44.167	43.23	0.866	3.895	750	1.091	0.916	0.891
622	NCS1_KAN622-6_6.tif:0003-0797	0.93	4.151	0	22	6.81	57.45	0.794	3.859	743	1.437	0.696	0.886
623	NCS1_KAN622-6_6.tif:0004-0883	0.727	4.586	0	20	40.949	63.564	0.778	3.334	642	1.258	0.795	0.897
										649.956
624	NCS1_KAN622-7_1.tif:0001-0124	1.111	52.252	0	415	61.197	8.966	0.789	58.07	11182	1.18	0.847	0.897
625	NCS1_KAN622-7_1.tif:0002-0187	0.758	63.568	0	283	82.802	13.533	0.946	48.198	9281	1.149	0.87	0.927
626	NCS1_KAN622-7_1.tif:0003-0358	0.525	73.683	0	371	43.013	25.848	0.941	38.647	7442	1.361	0.735	0.971
627	NCS1_KAN622-7_1.tif:0004-0586	0.976	62.548	0	401	35.359	42.251	0.668	61.066	11759	1.91	0.524	0.821
628	NCS1_KAN622-7_2.tif:0001-0057	0.675	113.754	0	385	54.053	4.126	0.871	76.796	14788	1.239	0.807	0.963
629	NCS1_KAN622-7_2.tif:0002-0233	1.044	106.965	0	536	31.403	16.795	0.804	111.653	21500	1.621	0.617	0.897
630	NCS1_KAN622-7_2.tif:0003-0234	1.464	109.947	0	983	74.507	16.904	0.798	161.014	31005	1.472	0.68	0.917
631	NCS1_KAN622-7_2.tif:0004-0426	0.909	93.131	0	684	8.351	30.761	0.858	84.638	16298	1.257	0.795	0.909
632	NCS1_KAN622-7_2.tif:0005-0524	0.613	116.559	0	523	65.109	37.757	0.835	71.427	13754	1.467	0.682	0.918
633	NCS1_KAN622-7_2.tif:0006-0773	0.535	30.621	0	163	8.621	55.722	0.918	16.379	3154	1.468	0.681	0.954
634	NCS1_KAN622-7_2.tif:0007-0781	0.779	35.78	0	221	78.187	56.267	0.817	27.872	5367	1.361	0.734	0.898
635	NCS1_KAN622-7_2.tif:0008-0870	1.132	81.679	0	618	56.502	62.721	0.891	92.469	17806	1.091	0.917	0.926
636	NCS1_KAN622-7_2.tif:0009-0912	1.2	76.377	0	584	36.832	65.78	0.775	91.623	17643	1.043	0.959	0.895
637	NCS1_KAN622-7_3.tif:0001-0068	0.992	101.885	0	751	4.115	4.925	0.855	101.059	19460	1.147	0.871	0.934
638	NCS1_KAN622-7_3.tif:0002-0074	0.987	7.732	0	41	40.369	5.473	0.695	7.629	1469	1.58	0.633	0.843
639	NCS1_KAN622-7_3.tif:0003-0165	1.392	76.784	0	654	81.975	11.908	0.836	106.865	20578	1.624	0.616	0.931
640	NCS1_KAN622-7_3.tif:0004-0611	0.898	15.728	0	151	64.239	44.069	0.865	14.131	2721	1.169	0.855	0.951
641	NCS1_KAN622-7_3.tif:0005-0700	1.127	84.843	0	523	18.718	50.561	0.809	95.611	18411	1.279	0.782	0.906
642	NCS1_KAN622-7_3.tif:0006-0919	0.602	5.026	0	23	48.988	66.204	0.932	3.028	583	1.126	0.888	0.951
643	NCS1_KAN622-7_4.tif:0001-0202	1.018	69.643	0	391	19.701	14.556	0.948	70.886	13650	1.104	0.906	0.973
644	NCS1_KAN622-7_4.tif:0002-0349	0.836	57.155	0	416	8.272	25.178	0.844	47.787	9202	1.211	0.825	0.923
645	NCS1_KAN622-7_4.tif:0003-0413	0.914	99.46	0	649	43.59	29.724	0.935	90.906	17505	1.296	0.771	0.957
646	NCS1_KAN622-7_4.tif:0004-0432	0.919	104.169	0	526	63.923	31.154	0.918	95.751	18438	1.094	0.914	0.937
647	NCS1_KAN622-7_4.tif:0005-0633	1.267	90.393	0	918	80.13	45.608	0.857	114.54	22056	1.528	0.655	0.946
648	NCS1_KAN622-7_4.tif:0006-0833	0.976	99.872	0	641	10.419	60.05	0.775	97.507	18776	1.595	0.627	0.881
649	NCS1_KAN622-7_5.tif:0001-0159	0.935	69.25	0	478	10.508	11.503	0.789	64.733	12465	1.503	0.666	0.918
650	NCS1_KAN622-7_5.tif:0002-0227	1.002	35.166	0	350	33.775	16.385	0.823	35.246	6787	1.715	0.583	0.91
651	NCS1_KAN622-7_5.tif:0003-0268	1.22	119.204	0	998	87.598	19.38	0.859	145.476	28013	1.242	0.805	0.922
652	NCS1_KAN622-7_5.tif:0004-0409	0.68	83.779	0	352	55.171	29.516	0.836	56.995	10975	1.506	0.664	0.903
653	NCS1_KAN622-7_5.tif:0005-0545	1.153	120.568	0	852	67.445	39.317	0.725	139	26766	1.61	0.621	0.864
654	NCS1_KAN622-7_5.tif:0006-0743	0.95	76.344	0	465	44.547	53.578	0.909	72.553	13971	1.316	0.76	0.917
655	NCS1_KAN622-7_5.tif:0007-0859	0.976	46.08	0	387	68.147	61.96	0.861	44.988	8663	1.435	0.697	0.935
656	NCS1_KAN622-7_6.tif:0001-0084	0.753	97.483	0	430	9.542	6.005	0.806	73.405	14135	1.54	0.649	0.929
657	NCS1_KAN622-7_6.tif:0002-0274	1.127	132.055	0	991	29.286	19.76	0.793	148.815	28656	1.524	0.656	0.906
658	NCS1_KAN622-7_6.tif:0003-0544	0.982	107.905	0	696	54.328	39.263	0.877	105.909	20394	1.546	0.647	0.938
659	NCS1_KAN622-7_6.tif:0004-0604	0.613	20.22	0	133	29.707	43.564	0.849	12.391	2386	1.501	0.666	0.887
660	NCS1_KAN622-7_6.tif:0005-0897	1.028	83.732	0	653	9.228	64.704	0.783	86.097	16579	1.782	0.561	0.917
661	NCS1_KAN622-7_6.tif:0006-0956	1.054	102.207	0	816	64.525	68.944	0.881	107.747	20748	1.209	0.827	0.944
										14588.6
662	NCS1_KAN622-8_1.tif:0001-0130	1.018	121.454	0	846	18.465	9.409	0.801	123.623	23805	1.298	0.77	0.873
663	NCS1_KAN622-8_1.tif:0002-0262	0.831	100.612	0	688	39.345	18.864	0.925	83.599	16098	1.18	0.847	0.93
664	NCS1_KAN622-8_1.tif:0003-0404	0.857	93.091	0	689	46.065	29.081	0.817	79.767	15360	1.814	0.551	0.94
665	NCS1_KAN622-8_1.tif:0004-0530	1.35	117.958	0	1255	75.795	38.152	0.701	159.269	30669	1.675	0.597	0.837
666	NCS1_KAN622-8_1.tif:0005-0640	0.81	85.712	0	561	13.529	46.087	0.889	69.438	13371	1.139	0.878	0.945
667	NCS1_KAN622-8_1.tif:0006-0725	1.013	87.872	0	640	23.909	52.244	0.832	88.985	17135	1.591	0.628	0.918
668	NCS1_KAN622-8_2.tif:0001-0075	0.566	6.404	0	36	80.718	5.382	0.913	3.625	698	1.173	0.853	0.956
669	NCS1_KAN622-8_2.tif:0002-0099	1.08	59.851	0	384	74.777	7.128	0.739	64.649	12449	1.636	0.611	0.856
670	NCS1_KAN622-8_2.tif:0003-0177	0.992	89.696	0	654	16.405	12.817	0.867	88.969	17132	1.518	0.659	0.923
671	NCS1_KAN622-8_2.tif:0004-0281	0.779	82.9	0	428	23.711	20.295	0.899	64.577	12435	1.315	0.761	0.935
672	NCS1_KAN622-8_2.tif:0005-0388	0.805	41.858	0	174	72.493	27.995	0.919	33.693	6488	1.219	0.82	0.934
673	NCS1_KAN622-8_2.tif:0006-0472	0.909	198.343	0	940	72.583	34.022	0.895	180.254	34710	1.399	0.715	0.964
674	NCS1_KAN622-8_2.tif:0007-0548	1.101	103.741	0	932	21.794	39.449	0.807	114.213	21993	1.555	0.643	0.916
675	NCS1_KAN622-8_2.tif:0008-0806	1.293	58.534	0	556	31.042	58.056	0.807	75.69	14575	1.635	0.612	0.919
676	NCS1_KAN622-8_2.tif:0009-0997	0.935	119.211	0	805	74.592	71.851	0.799	111.435	21458	1.595	0.627	0.916
677	NCS1_KAN622-8_3.tif:0001-0062	0.587	41.673	0	229	79.542	4.516	0.935	24.455	4709	1.251	0.799	0.938
678	NCS1_KAN622-8_3.tif:0002-0110	0.696	119.963	0	484	5.532	7.946	0.864	83.48	16075	1.591	0.629	0.95
679	NCS1_KAN622-8_3.tif:0003-0128	1.184	132.32	0	1235	36.128	9.238	0.841	156.672	30169	1.469	0.681	0.942
680	NCS1_KAN622-8_3.tif:0004-0475	0.982	7.386	0	64	28.386	34.204	0.789	7.25	1396	1.817	0.55	0.889
681	NCS1_KAN622-8_3.tif:0005-0531	0.576	46.054	0	177	59.731	38.256	0.881	26.547	5112	1.2	0.833	0.895
682	NCS1_KAN622-8_3.tif:0006-0601	0.961	42.092	0	288	17.199	43.349	0.796	40.439	7787	1.553	0.644	0.885
683	NCS1_KAN622-8_3.tif:0007-0647	0.769	38.257	0	254	57.067	46.645	0.944	29.404	5662	1.082	0.924	0.955
684	NCS1_KAN622-8_3.tif:0008-0771	0.914	159.875	0	846	90.029	55.612	0.949	146.125	28138	1.192	0.839	0.944
685	NCS1_KAN622-8_3.tif:0009-0829	0.976	143.819	0	1044	41.694	59.831	0.799	140.412	27038	1.578	0.634	0.91
686	NCS1_KAN622-8_3.tif:0010-0927	0.706	94.926	0	402	15.806	66.803	0.926	67.044	12910	1.281	0.781	0.958
687	NCS1_KAN622-8_4.tif:0001-0038	1.101	96.948	0	753	89.064	2.819	0.804	106.735	20553	1.437	0.696	0.93
688	NCS1_KAN622-8_4.tif:0002-0174	1.174	174.283	0	1368	34.355	12.588	0.886	204.548	39388	1.312	0.762	0.932
689	NCS1_KAN622-8_4.tif:0003-0228	0.55	5.462	0	28	80.045	16.463	0.877	3.007	579	1.468	0.681	0.922
690	NCS1_KAN622-8_4.tif:0004-0369	0.997	88.443	0	737	9.417	26.663	0.852	88.185	16981	1.572	0.636	0.93
691	NCS1_KAN622-8_4.tif:0005-0517	0.94	155.331	0	977	46.031	37.265	0.887	146.005	28115	1.065	0.939	0.923
692	NCS1_KAN622-8_4.tif:0006-0635	1.117	126.702	0	963	79.643	45.738	0.818	141.467	27241	1.452	0.689	0.903
693	NCS1_KAN622-8_4.tif:0007-0954	0.821	75.684	0	387	43.643	68.771	0.79	62.1	11958	1.741	0.574	0.929
694	NCS1_KAN622-8_5.tif:0001-0041	0.81	24.808	0	119	68.625	3.006	0.879	20.097	3870	1.269	0.788	0.918
695	NCS1_KAN622-8_5.tif:0002-0098	0.8	132.078	0	717	9.202	7.079	0.899	105.629	20340	1.365	0.733	0.933
696	NCS1_KAN622-8_5.tif:0003-0312	1.246	112.221	0	1072	74.159	22.513	0.777	139.867	26933	1.87	0.535	0.916
697	NCS1_KAN622-8_5.tif:0004-0352	0.758	122.411	0	621	21.062	25.399	0.875	92.812	17872	1.444	0.693	0.924
698	NCS1_KAN622-8_5.tif:0005-0633	0.717	55.254	0	198	25.724	45.621	0.89	39.598	7625	1.49	0.671	0.972
699	NCS1_KAN622-8_5.tif:0006-0785	1.137	100.479	0	727	90.083	56.564	0.77	114.275	22005	1.416	0.706	0.88
700	NCS1_KAN622-8_5.tif:0007-0847	1.07	98.782	0	799	14.667	61.035	0.768	105.675	20349	1.611	0.621	0.875
701	NCS1_KAN622-8_6.tif:0001-0046	1.091	87.533	0	536	80.33	3.332	0.877	95.46	18382	1.087	0.92	0.919
702	NCS1_KAN622-8_6.tif:0002-0084	1.096	58.014	0	472	58.267	6.101	0.834	63.569	12241	1.578	0.634	0.94
703	NCS1_KAN622-8_6.tif:0003-0107	1.049	82.559	0	597	47.933	7.703	0.877	86.606	16677	1.246	0.802	0.935
704	NCS1_KAN622-8_6.tif:0004-0134	1.085	100.852	0	951	86.276	9.686	0.833	109.461	21078	1.785	0.56	0.981
705	NCS1_KAN622-8_6.tif:0005-0157	1.34	105.039	0	864	30.184	11.302	0.842	140.734	27100	1.439	0.695	0.933
706	NCS1_KAN622-8_6.tif:0006-0206	0.872	163.75	0	1158	34.083	14.874	0.902	142.863	27510	1.216	0.823	0.946
707	NCS1_KAN622-8_6.tif:0007-0343	0.711	106.759	0	588	65.069	24.77	0.932	75.955	14626	1.342	0.745	0.951
708	NCS1_KAN622-8_6.tif:0008-0480	1.049	90.203	0	607	62.59	34.62	0.724	94.624	18221	1.862	0.537	0.852
709	NCS1_KAN622-8_6.tif:0009-0532	0.904	108.356	0	515	36.067	38.384	0.861	97.912	18854	1.317	0.759	0.933
710	NCS1_KAN622-8_6.tif:0010-0589	0.587	39.726	0	247	77.524	42.504	0.964	23.312	4489	1.114	0.898	0.946
711	NCS1_KAN622-8_6.tif:0011-0906	0.867	116.359	0	780	91.634	65.282	0.896	100.913	19432	1.321	0.757	0.963
712	NCS1_KAN622-8_6.tif:0012-0957	0.696	77.231	0	402	29.772	68.939	0.878	53.744	10349	1.419	0.705	0.908
										17061.6
713	NCS1_KAN622-9_1.tif:0001-0035	0.701	13.319	0	104	88.992	2.519	0.904	9.337	1798	1.401	0.714	0.985
714	NCS1_KAN622-9_1.tif:0002-0079	0.836	7.13	0	121	23.1	5.736	0.898	5.962	1148	1.328	0.753	0.92
715	NCS1_KAN622-9_1.tif:0003-0442	0.805	10.587	0	58	87.465	31.864	0.887	8.522	1641	1.396	0.717	0.909
716	NCS1_KAN622-9_1.tif:0004-0503	0.748	31.653	0	170	17.98	36.276	0.876	23.67	4558	1.61	0.621	0.923
717	NCS1_KAN622-9_1.tif:0005-0535	0.846	13.564	0	78	45.165	38.543	0.846	11.482	2211	1.167	0.857	0.896
718	NCS1_KAN622-9_1.tif:0006-0763	0.639	5.748	0	37	86.863	55.032	0.847	3.672	707	1.692	0.591	0.957
719	NCS1_KAN622-9_2.tif:0001-0114	0.94	60.591	0	542	80.172	8.225	0.848	56.953	10967	1.229	0.814	0.912
720	NCS1_KAN622-9_2.tif:0002-0141	0.701	4.156	0	27	67.984	10.171	0.861	2.913	561	1.438	0.695	0.934
721	NCS1_KAN622-9_2.tif:0003-0149	0.836	24.217	0	171	16.496	10.697	0.771	20.248	3899	1.048	0.954	0.861
722	NCS1_KAN622-9_2.tif:0004-0406	0.763	9.075	0	133	72.583	29.257	0.881	6.928	1334	1.23	0.813	0.925
723	NCS1_KAN622-9_2.tif:0005-0485	0.748	9.368	0	74	34.972	34.998	0.885	7.006	1349	1.223	0.817	0.917
724	NCS1_KAN622-9_2.tif:0006-0736	1.236	46.769	0	453	84.595	53.129	0.823	57.805	11131	1.315	0.761	0.903
725	NCS1_KAN622-9_2.tif:0007-0981	0.789	3.862	0	23	54.193	70.711	0.752	3.048	587	1.93	0.518	0.913
726	NCS1_KAN622-9_3.tif:0001-0166	0.862	4.994	0	25	58.846	11.948	0.841	4.305	829	1.743	0.574	0.943
727	NCS1_KAN622-9_3.tif:0002-0329	0.701	22.748	0	107	36.938	23.634	0.707	15.948	3071	1.359	0.736	0.849
728	NCS1_KAN622-9_3.tif:0003-0376	0.654	6.119	0	76	6.135	27.125	0.848	4.004	771	1.204	0.831	0.881
729	NCS1_KAN622-9_3.tif:0004-0603	0.644	4.048	0	18	13.963	43.497	0.867	2.607	502	1.583	0.632	0.932
730	NCS1_KAN622-9_3.tif:0005-0674	0.81	10.391	0	56	34.78	48.534	0.849	8.418	1621	1.116	0.896	0.884
731	NCS1_KAN622-9_4.tif:0001-0085	0.795	22.902	0	321	25.357	6.122	0.941	18.197	3504	1.088	0.919	0.953
732	NCS1_KAN622-9_4.tif:0002-0440	0.966	4.108	0	25	82.902	31.726	0.863	3.968	764	1.266	0.79	0.912
733	NCS1_KAN622-9_4.tif:0003-0688	0.971	44.444	0	291	9.67	49.605	0.888	43.16	8311	1.419	0.705	0.928
734	NCS1_KAN622-9_4.tif:0004-0854	0.618	19.95	0	153	24.446	61.492	0.866	12.329	2374	1.166	0.858	0.926
735	NCS1_KAN622-9_4.tif:0005-0855	0.976	75.532	0	421	54.03	61.611	0.872	73.743	14200	1.361	0.735	0.928
736	NCS1_KAN622-9_5.tif:0001-0008	0.67	16.194	0	143	90.351	0.615	0.913	10.848	2089	1.2	0.833	0.959
737	NCS1_KAN622-9_5.tif:0002-0045	0.862	6.524	0	54	77.55	3.261	0.891	5.624	1083	1.36	0.735	0.943
738	NCS1_KAN622-9_5.tif:0003-0232	0.696	4.679	0	26	43.007	16.775	0.937	3.256	627	1.211	0.826	0.947
739	NCS1_KAN622-9_5.tif:0004-0426	0.841	9.969	0	65	16.949	30.687	0.96	8.387	1615	1.141	0.876	0.945
740	NCS1_KAN622-9_5.tif:0005-0719	0.525	8.792	0	31	16.199	51.843	0.821	4.612	888	1.832	0.546	0.962
741	NCS1_KAN622-9_5.tif:0006-0790	1.127	49.018	0	397	52.503	56.915	0.819	55.24	10637	1.439	0.695	0.882
742	NCS1_KAN622-9_5.tif:0007-0919	0.935	7.922	0	155	76.391	66.2	0.895	7.405	1426	1.379	0.725	0.918
743	NCS1_KAN622-9_5.tif:0008-0981	0.711	4.752	0	20	1.994	70.697	0.912	3.381	651	1.435	0.697	0.913
744	NCS1_KAN622-9_6.tif:0001-0114	1.007	33.51	0	334	8.808	8.225	0.835	33.761	6501	1.256	0.796	0.909
745	NCS1_KAN622-9_6.tif:0002-0404	0.914	10.994	0	83	61.417	29.073	0.926	10.049	1935	1.231	0.812	0.929
746	NCS1_KAN622-9_6.tif:0003-0474	0.919	6.203	0	34	36.948	34.186	0.888	5.702	1098	1.364	0.733	0.924
747	NCS1_KAN622-9_6.tif:0004-0642	0.8	5.734	0	28	23.712	46.277	0.877	4.586	883	1.523	0.657	0.954
										3064.89
1	NCS1_KAN622-10_1.tif:0001-0073	1.059	53.284	0	353	32.972	5.227	0.87	56.45	10870	1.143	0.875	0.909
2	NCS1_KAN622-10_1.tif:0002-0224	1.293	199.803	0	1397	74.115	16.104	0.813	258.364	49751	1.358	0.736	0.912
3	NCS1_KAN622-10_1.tif:0003-0372	1.07	132.927	0	944	88.316	26.847	0.791	142.204	27383	1.506	0.664	0.888
4	NCS1_KAN622-10_1.tif:0004-0600	1.132	125.486	0	1054	63.428	43.229	0.854	142.064	27356	1.255	0.797	0.92
5	NCS1_KAN622-10_1.tif:0005-0630	1.366	75.882	0	730	12.466	45.507	0.777	103.64	19957	1.1	0.909	0.898
6	NCS1_KAN622-10_1.tif:0006-0772	1.381	111.053	0	871	86.653	55.642	0.862	153.406	29540	1.168	0.856	0.917
7	NCS1_KAN622-10_1.tif:0007-0911	0.961	111.795	0	822	42.407	65.728	0.803	107.405	20682	1.365	0.733	0.9
8	NCS1_KAN622-10_2.tif:0001-0123	1.532	109.132	0	948	27.604	8.9	0.829	167.188	32194	1.53	0.654	0.922
9	NCS1_KAN622-10_2.tif:0002-0127	1.174	54.92	0	371	39.424	9.231	0.738	64.457	12412	1.645	0.608	0.868
10	NCS1_KAN622-10_2.tif:0003-0148	0.867	94.299	0	433	3.412	10.713	0.835	81.782	15748	1.644	0.608	0.952
11	NCS1_KAN622-10_2.tif:0004-0287	1.366	119.224	0	1106	74.092	20.683	0.83	162.836	31356	1.359	0.736	0.908
12	NCS1_KAN622-10_2.tif:0005-0415	1.044	128.289	0	905	75.706	29.927	0.865	133.91	25786	1.149	0.87	0.92
13	NCS1_KAN622-10_2.tif:0006-0446	1.142	78.45	0	477	62.863	32.149	0.764	89.629	17259	1.897	0.527	0.938
14	NCS1_KAN622-10_2.tif:0007-0637	0.795	73.359	0	234	71.974	45.964	0.917	58.288	11224	1.368	0.731	0.947
15	NCS1_KAN622-10_2.tif:0008-0644	0.654	52.19	0	215	85.511	46.417	0.881	34.15	6576	1.327	0.754	0.923
16	NCS1_KAN622-10_2.tif:0009-0688	0.587	15.469	0	74	49.081	49.618	0.832	9.078	1748	1.443	0.693	0.958
17	NCS1_KAN622-10_2.tif:0010-0721	0.852	68.726	0	321	32.157	52.007	0.734	58.532	11271	1.567	0.638	0.861
18	NCS1_KAN622-10_2.tif:0011-0748	0.67	33.364	0	85	17.552	53.933	0.902	22.351	4304	1.319	0.758	0.935
19	NCS1_KAN622-10_2.tif:0012-0962	0.68	89.725	0	396	43.036	69.344	0.927	61.04	11754	1.22	0.82	0.967
20	NCS1_KAN622-10_3.tif:0001-0304	0.737	93.401	0	537	19.548	21.947	0.86	68.877	13263	1.009	0.991	0.925
21	NCS1_KAN622-10_3.tif:0002-0400	1.106	76.939	0	632	46.33	28.797	0.811	85.105	16388	1.455	0.687	0.899
22	NCS1_KAN622-10_3.tif:0003-0458	0.634	20.525	0	179	6.111	33.04	0.924	13.004	2504	1.307	0.765	0.976
23	NCS1_KAN622-10_3.tif:0004-0511	1.22	115.234	0	1098	60.257	36.814	0.782	140.63	27080	1.552	0.644	0.89
24	NCS1_KAN622-10_3.tif:0005-0551	1.459	74.107	0	659	51.49	39.692	0.732	108.142	20824	1.358	0.736	0.875
25	NCS1_KAN622-10_3.tif:0006-0687	1.246	112.925	0	1045	62.632	49.61	0.799	140.745	27102	1.345	0.743	0.899
26	NCS1_KAN622-10_3.tif:0007-0839	0.852	101.848	0	702	21.571	60.468	0.859	86.741	16703	1.105	0.905	0.927
27	NCS1_KAN622-10_3.tif:0008-0852	0.956	110.951	0	637	75.711	61.373	0.792	106.018	20415	1.131	0.884	0.864
28	NCS1_KAN622-10_4.tif:0001-0043	1.049	200.119	0	1457	56.92	3.094	0.851	209.928	40424	1.499	0.667	0.937
29	NCS1_KAN622-10_4.tif:0002-0140	1.059	69.598	0	737	91.581	10.095	0.777	73.732	14198	1.368	0.731	0.909
30	NCS1_KAN622-10_4.tif:0003-0249	1.413	107.25	0	925	75.985	17.993	0.849	151.494	29172	1.304	0.767	0.919
31	NCS1_KAN622-10_4.tif:0004-0340	1.345	56.444	0	513	31.024	24.478	0.735	75.919	14619	1.693	0.591	0.881
32	NCS1_KAN622-10_4.tif:0005-0415	1.464	77.915	0	815	31.028	29.908	0.779	114.104	21972	1.545	0.647	0.888
33	NCS1_KAN622-10_4.tif:0006-0628	0.691	181.94	0	831	37.433	45.288	0.826	125.664	24198	1.101	0.908	0.905
34	NCS1_KAN622-10_4.tif:0007-0742	1.085	82.962	0	573	70.67	53.502	0.88	90.044	17339	1.1	0.909	0.925
35	NCS1_KAN622-10_4.tif:0008-0998	0.826	52.767	0	342	43.346	71.936	0.787	43.571	8390	1.797	0.556	0.903
36	NCS1_KAN622-10_5.tif:0001-0191	0.608	29.872	0	218	87.438	13.764	0.928	18.15	3495	1.166	0.858	0.918
37	NCS1_KAN622-10_5.tif:0002-0236	1.007	43.784	0	343	62.561	17.005	0.682	44.111	8494	2.245	0.445	0.884
38	NCS1_KAN622-10_5.tif:0003-0362	0.883	94.065	0	650	39.361	26.123	0.815	83.044	15991	1.273	0.785	0.899
39	NCS1_KAN622-10_5.tif:0004-0387	1.091	84.333	0	704	22.592	27.873	0.761	91.971	17710	1.972	0.507	0.888
40	NCS1_KAN622-10_5.tif:0005-0575	1.054	70.719	0	580	36.02	41.489	0.796	74.553	14356	1.594	0.628	0.91
41	NCS1_KAN622-10_5.tif:0006-0588	0.826	49.83	0	256	48.228	42.404	0.853	41.145	7923	1.517	0.659	0.944
42	NCS1_KAN622-10_5.tif:0007-0942	0.743	24.685	0	228	65.616	67.915	0.835	18.332	3530	1.351	0.74	0.905
43	NCS1_KAN622-10_6.tif:0001-0108	1.122	133.306	0	1209	69.149	7.782	0.902	149.531	28794	1.035	0.966	0.921
44	NCS1_KAN622-10_6.tif:0002-0300	1.049	63.985	0	459	55.405	21.672	0.792	67.121	12925	1.603	0.624	0.906
45	NCS1_KAN622-10_6.tif:0003-0498	1.158	43.175	0	356	30.455	35.977	0.799	50	9628	1.176	0.851	0.925
46	NCS1_KAN622-10_6.tif:0004-0530	0.982	123.646	0	844	66.586	38.254	0.927	121.359	23369	1.331	0.751	0.952
47	NCS1_KAN622-10_6.tif:0005-0561	1.542	96.145	0	965	77.136	40.446	0.795	148.29	28555	1.708	0.586	0.912
48	NCS1_KAN622-10_6.tif:0006-0783	0.898	83.179	0	452	82.312	56.46	0.792	74.729	14390	1.35	0.741	0.896
49	NCS1_KAN622-10_6.tif:0007-0795	1.033	108.915	0	711	5.019	57.297	0.864	112.556	21674	1.465	0.683	0.939
50	NCS1_KAN622-10_6.tif:0008-0984	0.909	104.714	0	505	29.932	70.949	0.93	95.164	18325	1.144	0.874	0.938
										18218.4
51	NCS1_KAN622-11_1.tif:0001-0022	1.106	67.211	0	445	46.446	1.605	0.852	74.345	14316	1.356	0.738	0.918
52	NCS1_KAN622-11_1.tif:0002-0236	0.924	92.989	0	538	30.801	17.088	0.861	85.957	16552	1.319	0.758	0.96
53	NCS1_KAN622-11_1.tif:0003-0278	1.22	47.166	0	382	12.755	19.995	0.745	57.561	11084	1.698	0.589	0.906
54	NCS1_KAN622-11_1.tif:0004-0298	1.142	100.795	0	958	25.556	21.603	0.73	115.158	22175	1.434	0.697	0.885
55	NCS1_KAN622-11_1.tif:0005-0392	0.862	113.108	0	700	64.881	28.222	0.849	97.507	18776	1.362	0.734	0.949
56	NCS1_KAN622-11_1.tif:0006-0467	1.397	116	0	889	75.286	33.701	0.769	162.047	31204	1.97	0.508	0.906
57	NCS1_KAN622-11_1.tif:0007-0540	1.714	113.258	0	1385	67.378	38.94	0.702	194.094	37375	2.114	0.473	0.892
58	NCS1_KAN622-11_1.tif:0008-0668	0.763	64.918	0	351	35.102	48.122	0.658	49.558	9543	2.077	0.481	0.826
59	NCS1_KAN622-11_1.tif:0009-0700	1.168	71.231	0	442	87.702	50.403	0.715	83.231	16027	1.916	0.522	0.872
60	NCS1_KAN622-11_1.tif:0010-0756	0.737	106.056	0	517	4.069	54.513	0.878	78.209	15060	1.183	0.846	0.996
61	NCS1_KAN622-11_2.tif:0001-0033	1.137	81.416	0	662	18.125	2.355	0.715	92.594	17830	1.775	0.564	0.867
62	NCS1_KAN622-11_2.tif:0002-0041	0.872	115.143	0	646	68.524	2.976	0.924	100.456	19344	1.147	0.872	0.952
63	NCS1_KAN622-11_2.tif:0003-0283	1.371	72.985	0	739	37.697	20.414	0.672	100.062	19268	1.756	0.569	0.828
64	NCS1_KAN622-11_2.tif:0004-0295	0.618	7.193	0	82	7.05	21.246	0.891	4.445	856	1.288	0.776	0.933
65	NCS1_KAN622-11_2.tif:0005-0348	1.106	97.742	0	720	25.568	25.065	0.695	108.116	20819	1.921	0.521	0.832
66	NCS1_KAN622-11_2.tif:0006-0432	1.028	60.944	0	430	56.936	31.155	0.898	62.666	12067	1.293	0.774	0.941
67	NCS1_KAN622-11_2.tif:0007-0462	0.696	94.478	0	308	70.886	33.299	0.842	65.745	12660	1.104	0.906	0.924
68	NCS1_KAN622-11_2.tif:0008-0747	0.623	154.233	0	586	72.202	53.895	0.795	96.115	18508	1.57	0.637	0.92
69	NCS1_KAN622-11_2.tif:0009-0810	1.329	101.898	0	969	69.212	58.32	0.712	135.468	26086	1.977	0.506	0.887
70	NCS1_KAN622-11_2.tif:0010-0812	0.836	68.46	0	344	90.867	58.531	0.744	57.239	11022	1.978	0.506	0.904
71	NCS1_KAN622-11_2.tif:0011-0971	1.122	98.176	0	831	87.579	70.039	0.902	110.126	21206	1.245	0.804	0.937
72	NCS1_KAN622-11_3.tif:0001-0129	1.485	103.378	0	944	45.627	9.255	0.839	153.541	29566	1.439	0.695	0.927
73	NCS1_KAN622-11_3.tif:0002-0143	0.639	87.537	0	361	61.581	10.345	0.824	55.915	10767	1.719	0.582	0.957
74	NCS1_KAN622-11_3.tif:0003-0151	0.789	76.086	0	363	17.327	10.892	0.888	60.059	11565	1.083	0.924	0.935
75	NCS1_KAN622-11_3.tif:0004-0321	0.763	144.408	0	696	24.41	23.085	0.881	110.24	21228	1.326	0.754	0.925
76	NCS1_KAN622-11_3.tif:0005-0410	0.883	114.259	0	679	66.252	29.596	0.87	100.872	19424	1.114	0.898	0.947
77	NCS1_KAN622-11_3.tif:0006-0527	0.779	129.813	0	504	77.964	37.985	0.876	101.121	19472	1.305	0.766	0.938
78	NCS1_KAN622-11_3.tif:0007-0555	1.387	120.067	0	996	7.424	40.047	0.809	166.482	32058	1.555	0.643	0.927
79	NCS1_KAN622-11_3.tif:0008-0729	1.08	83.236	0	512	50.214	52.506	0.679	89.909	17313	2.113	0.473	0.868
80	NCS1_KAN622-11_3.tif:0009-0775	0.561	11.981	0	103	20.722	55.829	0.921	6.72	1294	1.204	0.831	0.931
81	NCS1_KAN622-11_3.tif:0010-0822	1.226	100.919	0	905	39.103	59.215	0.77	123.685	23817	1.693	0.591	0.892
82	NCS1_KAN622-11_3.tif:0011-0978	0.982	70.91	0	489	57.249	70.493	0.796	69.599	13402	1.826	0.548	0.911
83	NCS1_KAN622-11_4.tif:0001-0049	0.987	177.489	0	1316	40.61	3.577	0.843	175.128	33723	1.2	0.833	0.913
84	NCS1_KAN622-11_4.tif:0002-0168	1.257	120.57	0	1190	82.639	12.149	0.834	151.526	29178	1.508	0.663	0.951
85	NCS1_KAN622-11_4.tif:0003-0573	1.158	94.408	0	936	58.07	41.336	0.849	109.331	21053	1.468	0.681	0.912
86	NCS1_KAN622-11_4.tif:0004-0621	1.023	59.706	0	443	30.191	44.768	0.914	61.082	11762	1.127	0.887	0.936
87	NCS1_KAN622-11_4.tif:0005-0737	1.091	95.124	0	789	67.005	53.111	0.848	103.738	19976	1.308	0.764	0.925
88	NCS1_KAN622-11_5.tif:0001-0080	1.054	75.212	0	410	34.589	5.756	0.742	79.289	15268	1.965	0.509	0.869
89	NCS1_KAN622-11_5.tif:0002-0173	1.049	72.535	0	417	42.892	12.48	0.869	76.09	14652	1.475	0.678	0.931
90	NCS1_KAN622-11_5.tif:0003-0400	1.091	104.848	0	765	45.907	28.825	0.793	114.343	22018	1.555	0.643	0.899
91	NCS1_KAN622-11_5.tif:0004-0405	1.085	121.589	0	1064	57.529	29.242	0.854	131.968	25412	1.184	0.845	0.907
92	NCS1_KAN622-11_5.tif:0005-0667	1.059	60.75	0	332	81.993	48.098	0.783	64.359	12393	1.692	0.591	0.909
93	NCS1_KAN622-11_5.tif:0006-0782	0.779	6.347	0	62	12.659	56.4	0.805	4.944	952	1.804	0.554	0.917
94	NCS1_KAN622-11_5.tif:0007-1016	1.007	113.701	0	858	79.345	73.268	0.707	114.55	22058	2.524	0.396	0.982
95	NCS1_KAN622-11_6.tif:0001-0277	1.267	134.246	0	1055	85.017	20.017	0.841	170.107	32756	1.448	0.691	0.944
96	NCS1_KAN622-11_6.tif:0002-0391	0.727	84.121	0	420	24.901	28.187	0.818	61.16	11777	1.367	0.732	0.883
97	NCS1_KAN622-11_6.tif:0003-0446	0.525	13.01	0	171	1.249	32.156	0.929	6.824	1314	1.105	0.905	0.935
98	NCS1_KAN622-11_6.tif:0004-0507	1.226	42.691	0	379	76.878	36.571	0.777	52.321	10075	1.605	0.623	0.906
99	NCS1_KAN622-11_6.tif:0005-0614	0.971	54.235	0	320	55.701	44.357	0.663	52.669	10142	1.929	0.518	0.848
100	NCS1_KAN622-11_6.tif:0006-0843	1.496	112.052	0	968	44.851	60.771	0.836	167.588	32271	1.848	0.541	0.973
101	NCS1_KAN622-11_6.tif:0007-0854	0.961	98.011	0	772	3.95	61.551	0.71	94.162	18132	1.638	0.61	0.856
										17972.5
102	NCS1_KAN622-12_1.tif:0001-0058	1.137	110.959	0	947	62.481	4.151	0.817	126.193	24300	1.402	0.713	0.899
103	NCS1_KAN622-12_1.tif:0002-0160	1.298	59.192	0	611	26.077	11.564	0.832	76.848	14798	1.323	0.756	0.901
104	NCS1_KAN622-12_1.tif:0003-0503	1.08	89.716	0	680	37.731	36.262	0.887	96.909	18661	1.261	0.793	0.906
105	NCS1_KAN622-12_1.tif:0004-0516	0.623	10.725	0	112	51.63	37.156	0.774	6.684	1287	1.579	0.633	0.892
106	NCS1_KAN622-12_1.tif:0005-0532	0.945	101.445	0	767	10.958	38.322	0.86	95.881	18463	1.353	0.739	0.95
107	NCS1_KAN622-12_1.tif:0006-0615	1.096	94.322	0	788	67.908	44.348	0.889	103.354	19902	1.252	0.799	0.938
108	NCS1_KAN622-12_1.tif:0007-0620	0.987	9.779	0	43	38.231	44.724	0.854	9.649	1858	1.546	0.647	0.922
109	NCS1_KAN622-12_1.tif:0008-0723	0.878	49.74	0	383	21.456	52.097	0.856	43.654	8406	1.447	0.691	0.923
110	NCS1_KAN622-12_1.tif:0009-0798	1.267	131.963	0	948	85.422	57.536	0.844	167.214	32199	1.536	0.651	0.924
111	NCS1_KAN622-12_1.tif:0010-0928	0.94	49.431	0	423	14.328	66.919	0.829	46.463	8947	1.827	0.547	0.945
112	NCS1_KAN622-12_2.tif:0001-0110	0.519	27.69	0	188	68.116	7.961	0.903	14.38	2769	1.121	0.892	0.957
113	NCS1_KAN622-12_2.tif:0002-0139	1.117	48.14	0	399	82.001	10.009	0.868	53.749	10350	1.293	0.773	0.945
114	NCS1_KAN622-12_2.tif:0003-0329	1.065	116.639	0	746	79.677	23.768	0.91	124.173	23911	1.064	0.94	0.953
115	NCS1_KAN622-12_2.tif:0004-0383	1.163	100.817	0	873	64.034	27.602	0.853	117.277	22583	1.19	0.84	0.922
116	NCS1_KAN622-12_2.tif:0005-0381	0.634	94.557	0	348	5.759	27.43	0.913	59.908	11536	1.088	0.919	0.935
117	NCS1_KAN622-12_2.tif:0006-0504	1.033	94.03	0	697	10.462	36.247	0.734	97.174	18712	1.526	0.655	0.871
118	NCS1_KAN622-12_2.tif:0007-0636	1.096	69.806	0	585	21.678	45.86	0.817	76.49	14729	1.598	0.626	0.932
119	NCS1_KAN622-12_2.tif:0008-0855	1.08	52.572	0	371	5.247	61.661	0.815	56.787	10935	1.562	0.64	0.906
120	NCS1_KAN622-12_2.tif:0009-0857	0.722	58.036	0	334	29.023	61.816	0.854	41.893	8067	1.56	0.641	0.914
121	NCS1_KAN622-12_2.tif:0010-0907	0.576	72.55	0	337	42.766	65.353	0.891	41.82	8053	1.203	0.831	0.925
122	NCS1_KAN622-12_2.tif:0011-0932	0.566	64.275	0	380	91.759	67.228	0.78	36.383	7006	1.943	0.515	0.952
123	NCS1_KAN622-12_2.tif:0012-0973	1.018	59.418	0	449	63.764	70.153	0.808	60.479	11646	1.529	0.654	0.912
124	NCS1_KAN622-12_3.tif:0001-0058	1.059	111.373	0	974	27.685	4.144	0.905	117.988	22720	1.238	0.808	0.944
125	NCS1_KAN622-12_3.tif:0002-0058	0.717	65.841	0	266	86.721	4.197	0.939	47.185	9086	1.104	0.906	0.952
126	NCS1_KAN622-12_3.tif:0003-0430	0.867	5.24	0	31	9.114	31.029	0.941	4.544	875	1.347	0.742	0.957
127	NCS1_KAN622-12_3.tif:0004-0467	1.106	47.164	0	426	67.787	33.651	0.795	52.17	10046	1.253	0.798	0.882
128	NCS1_KAN622-12_3.tif:0005-0734	0.924	99.022	0	658	44.432	52.9	0.881	91.534	17626	1.232	0.811	0.93
129	NCS1_KAN622-12_3.tif:0006-0820	0.758	76.281	0	466	89.617	59.115	0.921	57.836	11137	1.225	0.816	0.915
130	NCS1_KAN622-12_3.tif:0007-0859	1.054	59.163	0	490	7.908	61.938	0.805	62.37	12010	1.693	0.591	0.896
131	NCS1_KAN622-12_4.tif:0001-0037	1.278	94.785	0	595	36.798	2.762	0.812	121.089	23317	1.283	0.779	0.904
132	NCS1_KAN622-12_4.tif:0002-0103	0.987	109.721	0	594	10.84	7.447	0.87	108.262	20847	1.563	0.64	0.955
133	NCS1_KAN622-12_4.tif:0003-0143	0.883	105.135	0	486	71.694	10.306	0.958	92.817	17873	1.024	0.976	0.95
134	NCS1_KAN622-12_4.tif:0004-0183	0.987	91.079	0	691	52.055	13.218	0.862	89.867	17305	1.52	0.658	0.934
135	NCS1_KAN622-12_4.tif:0005-0350	0.519	26.81	0	142	25.083	25.276	0.875	13.923	2681	1.415	0.707	0.962
136	NCS1_KAN622-12_4.tif:0006-0543	0.945	57.209	0	406	4.369	39.215	0.892	54.071	10412	1.062	0.942	0.919
137	NCS1_KAN622-12_4.tif:0007-0544	0.602	18.216	0	102	53.325	39.227	0.96	10.973	2113	1.107	0.904	0.951
138	NCS1_KAN622-12_4.tif:0008-0601	0.945	89.852	0	677	35.708	43.269	0.815	84.924	16353	1.544	0.648	0.941
139	NCS1_KAN622-12_4.tif:0009-0644	0.919	41.955	0	395	51.467	46.371	0.909	38.564	7426	1.261	0.793	0.924
140	NCS1_KAN622-12_4.tif:0010-0762	1.158	89.749	0	729	71.887	54.92	0.931	103.936	20014	1.115	0.897	0.939
141	NCS1_KAN622-12_4.tif:0011-0830	0.893	26.134	0	181	39.558	59.806	0.863	23.343	4495	1.205	0.83	0.896
142	NCS1_KAN622-12_4.tif:0012-0988	1.013	101.108	0	665	77.455	71.207	0.893	102.388	19716	1.227	0.815	0.947
143	NCS1_KAN622-12_5.tif:0001-0100	1.205	69.724	0	588	18.911	7.223	0.772	84.004	16176	1.845	0.542	0.908
144	NCS1_KAN622-12_5.tif:0002-0189	0.95	63.503	0	339	68.824	13.635	0.973	60.35	11621	1.109	0.902	0.961
145	NCS1_KAN622-12_5.tif:0003-0395	1.21	59.433	0	540	29.97	28.513	0.79	71.915	13848	1.765	0.566	0.907
146	NCS1_KAN622-12_5.tif:0004-0417	1.319	68.114	0	711	7.7	30.066	0.784	89.847	17301	1.757	0.569	0.919
147	NCS1_KAN622-12_5.tif:0005-0527	0.909	50.257	0	287	50.631	37.998	0.76	45.674	8795	1.516	0.66	0.868
148	NCS1_KAN622-12_5.tif:0006-0543	0.68	5.313	0	60	82.59	39.136	0.858	3.614	696	1.436	0.696	0.91
149	NCS1_KAN622-12_5.tif:0007-0726	1.215	66.137	0	586	8.487	52.432	0.75	80.369	15476	1.529	0.654	0.872
150	NCS1_KAN622-12_5.tif:0008-0785	1.381	53.165	0	502	88.819	56.577	0.788	73.441	14142	1.791	0.558	0.899
151	NCS1_KAN622-12_5.tif:0009-0841	0.711	33.964	0	121	45.18	60.619	0.947	24.164	4653	1.302	0.768	0.942
152	NCS1_KAN622-12_6.tif:0001-0070	1.122	75.25	0	605	37.017	5.055	0.79	84.409	16254	1.285	0.778	0.883
153	NCS1_KAN622-12_6.tif:0002-0118	0.867	8.419	0	75	87.775	8.488	0.879	7.302	1406	1.672	0.598	0.936
154	NCS1_KAN622-12_6.tif:0003-0149	0.763	7.755	0	73	56.76	10.734	0.837	5.92	1140	1.256	0.796	0.919
155	NCS1_KAN622-12_6.tif:0004-0352	0.649	95.192	0	500	18.608	25.408	0.851	61.793	11899	1.521	0.657	0.919
156	NCS1_KAN622-12_6.tif:0005-0470	1.329	83.199	0	853	79.553	33.863	0.725	110.609	21299	1.879	0.532	0.878
157	NCS1_KAN622-12_6.tif:0006-0534	1.205	92.642	0	824	59.771	38.468	0.766	111.616	21493	1.751	0.571	0.88
158	NCS1_KAN622-12_6.tif:0007-0587	1.355	87.866	0	883	45.607	42.241	0.752	119.094	22933	1.661	0.602	0.898
159	NCS1_KAN622-12_6.tif:0008-0686	0.904	100.144	0	500	7.088	49.465	0.861	90.491	17425	1.268	0.789	0.93
160	NCS1_KAN622-12_6.tif:0009-0943	1.049	40.901	0	389	84.231	68.012	0.818	42.906	8262	1.313	0.761	0.884
										13050.7
161	NCS1_KAN622-13_1.tif:0001-0048	0.935	5.372	0	44	44.275	3.494	0.903	5.022	967	1.276	0.784	0.935
162	NCS1_KAN622-13_1.tif:0002-0279	0.644	3.403	0	21	9.932	20.128	0.892	2.192	422	1.376	0.727	0.925
163	NCS1_KAN622-13_1.tif:0003-0287	0.821	4.241	0	19	33.245	20.681	0.947	3.479	670	1.31	0.763	0.955
164	NCS1_KAN622-13_1.tif:0004-0379	0.867	6.234	0	57	76.946	27.324	0.919	5.406	1041	1.355	0.738	0.946
165	NCS1_KAN622-13_1.tif:0005-0738	0.576	2.946	0	16	42.855	53.244	0.947	1.698	327	1.286	0.777	0.941
166	NCS1_KAN622-13_2.tif:0001-0140	0.94	4.403	0	27	30.22	10.091	0.887	4.139	797	1.297	0.771	0.94
167	NCS1_KAN622-13_2.tif:0002-0178	0.587	3.301	0	17	33.714	12.872	0.881	1.937	373	1.613	0.62	0.95
168	NCS1_KAN622-13_2.tif:0003-0315	0.867	3.611	0	19	45.101	22.749	0.919	3.131	603	1.298	0.771	0.952
169	NCS1_KAN622-13_2.tif:0004-0380	0.893	4.779	0	22	75.436	27.418	0.77	4.269	822	1.42	0.704	0.887
170	NCS1_KAN622-13_2.tif:0005-0598	0.935	5.172	0	25	86.519	43.153	0.903	4.835	931	1.37	0.73	0.93
171	NCS1_KAN622-13_2.tif:0006-0750	0.841	3.562	0	19	50.499	54.062	0.891	2.996	577	1.209	0.827	0.936
172	NCS1_KAN622-13_2.tif:0007-0887	0.732	5.447	0	27	15.704	63.997	0.876	3.988	768	1.113	0.898	0.922
173	NCS1_KAN622-13_2.tif:0008-0898	0.732	11.83	0	48	47.405	64.707	0.867	8.662	1668	1.245	0.803	0.898
174	NCS1_KAN622-13_2.tif:0009-0909	0.66	3.559	0	22	56.995	65.534	0.742	2.347	452	2.144	0.466	0.876
175	NCS1_KAN622-13_3.tif:0001-0187	1.002	4.492	0	31	74.695	13.539	0.895	4.502	867	1.088	0.919	0.928
176	NCS1_KAN622-13_3.tif:0002-0221	0.904	3.782	0	18	60.632	15.939	0.903	3.417	658	1.384	0.722	0.933
177	NCS1_KAN622-13_3.tif:0003-0226	0.846	4.791	0	31	36.751	16.32	0.966	4.056	781	1.348	0.742	0.956
178	NCS1_KAN622-13_3.tif:0004-0242	0.55	3.981	0	17	51.187	17.465	0.944	2.192	422	1.056	0.947	0.946
179	NCS1_KAN622-13_3.tif:0005-0426	0.701	3.637	0	18	22.196	30.645	0.707	2.55	491	1.469	0.681	0.831
180	NCS1_KAN622-13_3.tif:0006-0562	1.117	4.823	0	41	82.612	40.466	0.843	5.385	1037	1.423	0.703	0.931
181	NCS1_KAN622-13_3.tif:0007-0712	0.878	3.456	0	13	33.106	51.297	0.856	3.033	584	1.592	0.628	0.942
182	NCS1_KAN622-13_3.tif:0008-0967	0.639	3.577	0	19	52.801	69.69	0.959	2.285	440	1.11	0.901	0.972
183	NCS1_KAN622-13_4.tif:0001-0121	0.597	5.939	0	32	30.393	8.756	0.861	3.547	683	1.658	0.603	0.935
184	NCS1_KAN622-13_4.tif:0002-0142	0.8	4.545	0	47	87.786	10.258	0.899	3.635	700	1.293	0.773	0.939
185	NCS1_KAN622-13_4.tif:0003-0151	0.956	4.06	0	22	24.797	10.916	0.923	3.879	747	1.329	0.752	0.948
186	NCS1_KAN622-13_4.tif:0004-0404	0.623	3.85	0	18	37.821	29.099	0.883	2.399	462	1.161	0.861	0.952
187	NCS1_KAN622-13_4.tif:0005-0457	0.992	4.288	0	20	74.313	32.951	0.822	4.253	819	1.347	0.742	0.897
188	NCS1_KAN622-13_4.tif:0006-0505	0.556	3.215	0	17	15.359	36.385	0.953	1.786	344	1.207	0.828	0.96
189	NCS1_KAN622-13_4.tif:0007-0643	0.654	3.873	0	20	72.798	46.346	0.917	2.534	488	1.053	0.95	0.944
190	NCS1_KAN622-13_4.tif:0008-0713	0.763	8.918	0	74	30.952	51.415	0.859	6.808	1311	1.425	0.702	0.927
191	NCS1_KAN622-13_4.tif:0009-0910	0.722	3.755	0	17	69.41	65.619	0.95	2.711	522	1.213	0.825	0.921
192	NCS1_KAN622-13_5.tif:0001-0154	1.013	4.574	0	41	35.7	11.12	0.814	4.632	892	1.124	0.889	0.876
193	NCS1_KAN622-13_5.tif:0002-0281	0.857	3.776	0	18	69.933	20.275	0.898	3.235	623	1.287	0.777	0.927
194	NCS1_KAN622-13_5.tif:0003-0346	0.982	3.423	0	15	41.76	24.862	0.659	3.36	647	1.917	0.522	0.833
195	NCS1_KAN622-13_5.tif:0004-0500	0.992	4.749	0	28	56.019	36.046	0.867	4.71	907	1.352	0.74	0.929
196	NCS1_KAN622-13_5.tif:0005-0798	1.007	6.015	0	40	51.06	57.468	0.845	6.06	1167	1.309	0.764	0.89
197	NCS1_KAN622-13_5.tif:0006-0846	0.826	3.39	0	19	86.701	60.996	0.866	2.799	539	1.311	0.762	0.919
198	NCS1_KAN622-13_5.tif:0007-0866	0.737	4.092	0	19	39.638	62.41	0.755	3.017	581	1.819	0.55	0.866
199	NCS1_KAN622-13_5.tif:0008-0985	0.696	3.813	0	17	68.169	70.986	0.864	2.654	511	1.159	0.863	0.934
200	NCS1_KAN622-13_6.tif:0001-0036	0.722	4.173	0	25	51.199	2.602	0.803	3.012	580	1.296	0.772	0.877
201	NCS1_KAN622-13_6.tif:0002-0290	0.774	3.799	0	18	27.305	20.871	0.879	2.939	566	1.196	0.836	0.946
202	NCS1_KAN622-13_6.tif:0003-0477	0.924	3.545	0	15	47.598	34.396	0.915	3.277	631	1.148	0.871	0.937
203	NCS1_KAN622-13_6.tif:0004-0503	0.945	4.06	0	20	90.177	36.257	0.852	3.838	739	1.177	0.85	0.922
204	NCS1_KAN622-13_6.tif:0005-0543	0.914	3.222	0	20	15.364	39.099	0.883	2.945	567	1.121	0.892	0.921
205	NCS1_KAN622-13_6.tif:0006-0813	1.272	4.384	0	20	69.13	58.596	0.794	5.577	1074	1.782	0.561	0.918
206	NCS1_KAN622-13_6.tif:0007-1000	0.821	4.924	0	24	91.399	72.08	0.86	4.04	778	1.52	0.658	0.908
207	NCS1_KAN622-13_7.tif:0001-0044	0.93	3.905	0	18	84.446	3.181	0.898	3.63	699	1.253	0.798	0.916
208	NCS1_KAN622-13_7.tif:0002-0086	0.784	3.709	0	19	14.744	6.22	0.891	2.908	560	1.409	0.71	0.962
209	NCS1_KAN622-13_7.tif:0003-0290	0.608	3.496	0	21	70.38	20.849	0.851	2.124	409	1.2	0.833	0.918
210	NCS1_KAN622-13_7.tif:0004-0496	0.93	3.598	0	22	35.208	35.695	0.831	3.344	644	1.335	0.749	0.902
211	NCS1_KAN622-13_7.tif:0005-0768	0.857	4.085	0	26	15.558	55.372	0.749	3.5	674	1.702	0.587	0.848
212	NCS1_KAN622-13_7.tif:0006-0815	0.8	5.831	0	47	48.86	58.769	0.947	4.663	898	1.104	0.906	0.942
213	NCS1_KAN622-13_7.tif:0007-0968\	0.971	4.668	0	22	80.925	69.783	0.848	4.534	873	1.37	0.73	0.914
										701.154
214	NCS1_KAN622-14_1.tif:0001-0076	1.236	177.256	0	1291	22.626	5.446	0.888	219.083	42187	1.45	0.69	0.95
215	NCS1_KAN622-14_1.tif:0002-0204	1.179	99.203	0	721	80.967	14.727	0.882	116.944	22519	1.084	0.922	0.913
216	NCS1_KAN622-14_1.tif:0003-0226	0.852	81.207	0	392	56.515	16.322	0.868	69.162	13318	1.303	0.768	0.956
217	NCS1_KAN622-14_1.tif:0004-0491	0.95	107.65	0	621	49.028	35.422	0.857	102.305	19700	1.523	0.656	0.943
218	NCS1_KAN622-14_1.tif:0005-0743	0.872	82.881	0	669	21.89	53.58	0.813	72.309	13924	1.367	0.732	0.911
219	NCS1_KAN622-14_1.tif:0006-0823	1.054	97.143	0	511	48.686	59.345	0.829	102.409	19720	1.33	0.752	0.902
220	NCS1_KAN622-14_1.tif:0007-0836	1.314	124.296	0	1325	85.127	60.193	0.675	163.309	31447	1.385	0.722	0.848
221	NCS1_KAN622-14_2.tif:0001-0103	1.023	110.645	0	720	6.765	7.43	0.741	113.195	21797	1.71	0.585	0.881
222	NCS1_KAN622-14_2.tif:0002-0234	0.888	167.409	0	1065	58.969	16.887	0.896	148.664	28627	1.353	0.739	0.958
223	NCS1_KAN622-14_2.tif:0003-0408	0.717	81.717	0	456	23.965	29.398	0.845	58.563	11277	1.374	0.728	0.945
224	NCS1_KAN622-14_2.tif:0004-0574	1.132	151.417	0	1213	83.072	41.375	0.854	171.421	33009	1.308	0.765	0.918
225	NCS1_KAN622-14_2.tif:0005-0598	0.992	140.969	0	952	39.765	43.067	0.867	139.825	26925	1.288	0.777	0.907
226	NCS1_KAN622-14_2.tif:0006-0918	1.236	100.143	0	839	52.808	66.106	0.754	123.773	23834	1.752	0.571	0.922
227	NCS1_KAN622-14_2.tif:0007-0982	0.94	105.177	0	692	28.619	70.805	0.875	98.862	19037	1.617	0.619	0.973
228	NCS1_KAN622-14_3.tif:0001-0199	0.872	15.369	0	81	45.462	14.335	0.915	13.409	2582	1.279	0.782	0.944
229	NCS1_KAN622-14_3.tif:0002-0399	1.059	84.123	0	604	79.397	28.712	0.848	89.12	17161	1.475	0.678	0.949
230	NCS1_KAN622-14_3.tif:0003-0504	0.987	116.474	0	805	54.9	36.359	0.89	114.924	22130	1.089	0.918	0.943
231	NCS1_KAN622-14_3.tif:0004-0677	0.893	71.82	0	507	27.708	48.765	0.835	64.151	12353	1.561	0.641	0.896
232	NCS1_KAN622-14_3.tif:0005-0708	0.763	56.633	0	209	60.17	51.031	0.913	43.233	8325	1.244	0.804	0.945
233	NCS1_KAN622-14_3.tif:0006-0720	0.976	138.053	0	920	83.873	51.908	0.931	134.783	25954	1.112	0.9	0.959
234	NCS1_KAN622-14_4.tif:0001-0048	0.789	89.362	0	455	34.268	3.477	0.888	70.539	13583	1.456	0.687	0.938
235	NCS1_KAN622-14_4.tif:0002-0241	0.815	109.28	0	660	14.477	17.373	0.759	89.099	17157	1.845	0.542	0.9
236	NCS1_KAN622-14_4.tif:0003-0272	1.189	80.245	0	728	56.897	19.532	0.689	95.429	18376	1.846	0.542	0.851
237	NCS1_KAN622-14_4.tif:0004-0523	1.002	9.777	0	78	85.418	37.69	0.823	9.799	1887	1.244	0.804	0.877
238	NCS1_KAN622-14_4.tif:0005-0565	0.815	51.904	0	323	23.251	40.746	0.917	42.319	8149	1.066	0.938	0.943
239	NCS1_KAN622-14_4.tif:0006-0605	1.059	193.123	0	1510	62.299	43.648	0.894	204.594	39397	1.11	0.901	0.962
240	NCS1_KAN622-14_4.tif:0007-0829	1.236	110.571	0	986	87.133	59.74	0.863	136.663	26316	1.382	0.724	0.914
241	NCS1_KAN622-14_5.tif:0001-0125	1.153	7.982	0	38	39.264	9.011	0.888	9.202	1772	1.443	0.693	0.949
242	NCS1_KAN622-14_5.tif:0002-0248	1.117	98.307	0	678	21.014	17.863	0.832	109.762	21136	1.699	0.589	0.956
243	NCS1_KAN622-14_5.tif:0003-0428	0.665	33.078	0	204	15.846	30.85	0.871	21.988	4234	1.484	0.674	0.948
244	NCS1_KAN622-14_5.tif:0004-0537	0.857	46.358	0	268	55.459	38.726	0.898	39.722	7649	1.161	0.862	0.914
245	NCS1_KAN622-14_5.tif:0005-0630	1.947	153.787	0	1343	76.319	45.425	0.8	299.489	57670	1.082	0.924	0.895
246	NCS1_KAN622-14_5.tif:0006-0671	1.428	125.324	0	1137	43.368	48.388	0.865	178.977	34464	1.488	0.672	0.948
247	NCS1_KAN622-14_6.tif:0001-0114	1.054	59.631	0	387	49.699	8.241	0.748	62.863	12105	1.821	0.549	0.892
248	NCS1_KAN622-14_6.tif:0002-0157	1.381	98.03	0	937	82.119	11.397	0.761	135.416	26076	1.482	0.675	0.874
249	NCS1_KAN622-14_6.tif:0003-0302	0.597	71.243	0	280	50.94	21.792	0.734	42.547	8193	1.62	0.617	0.849
250	NCS1_KAN622-14_6.tif:0004-0394	0.945	68.154	0	448	36.474	28.435	0.78	64.416	12404	1.471	0.68	0.908
251	NCS1_KAN622-14_6.tif:0005-0559	1.283	61.595	0	480	32.463	40.321	0.73	79.009	15214	1.828	0.547	0.876
252	NCS1_KAN622-14_6.tif:0006-0671	0.779	166.947	0	866	27.752	48.395	0.899	130.047	25042	1.327	0.754	0.935
253	NCS1_KAN622-14_6.tif:0007-0758	1.309	74.98	0	555	55.165	54.687	0.764	98.125	18895	2.022	0.494	0.921
254	NCS1_KAN622-14_6.tif:0008-0797	1.397	88.881	0	906	63.022	57.537	0.824	124.163	23909	1.655	0.604	0.924
255	NCS1_KAN622-14_6.tif:0009-0832	1.511	74.179	0	705	78.712	59.852	0.733	112.099	21586	1.647	0.607	0.884
256	NCS1_KAN622-14_6.tif:0010-0915	0.582	4.661	0	49	15.131	65.964	0.889	2.711	522	1.29	0.775	0.9
257	NCS1_KAN622-15_1.tif:0001-0021	0.571	41.273	0	231	24.88	1.517	0.938	23.577	4540	1.382	0.724	0.94
258	NCS1_KAN622-15_1.tif:0002-0282	1.085	97.201	0	614	33.686	20.273	0.862	105.499	20315	1.288	0.776	0.933
259	NCS1_KAN622-15_1.tif:0003-0373	1.002	96.109	0	665	54.016	26.927	0.895	96.328	18549	1.283	0.779	0.928
260	NCS1_KAN622-15_1.tif:0004-0417	1.096	99.867	0	748	71.829	30.088	0.81	109.43	21072	1.439	0.695	0.909
261	NCS1_KAN622-15_1.tif:0005-0611	0.992	62.838	0	333	84.576	44.033	0.848	62.328	12002	1.47	0.68	0.923
262	NCS1_KAN622-15_1.tif:0006-0702	1.132	103.128	0	806	19.533	50.653	0.847	116.752	22482	1.289	0.776	0.905
263	NCS1_KAN622-15_1.tif:0007-0732	1.47	103	0	1024	57.06	52.689	0.774	151.375	29149	1.403	0.713	0.898
264	NCS1_KAN622-15_1.tif:0008-0862	0.976	30.452	0	139	61.269	62.193	0.827	29.731	5725	1.568	0.638	0.908
265	NCS1_KAN622-15_1.tif:0009-0960	1.366	66.939	0	755	3.382	69.162	0.785	91.425	17605	1.639	0.61	0.901
266	NCS1_KAN622-15_2.tif:0001-0150	0.919	28.362	0	199	28.675	10.804	0.868	26.07	5020	1.084	0.922	0.908
267	NCS1_KAN622-15_2.tif:0002-0303	0.94	17.79	0	125	8.283	21.798	0.779	16.722	3220	1.734	0.577	0.916
268	NCS1_KAN622-15_2.tif:0003-0310	0.784	18.609	0	81	88.52	22.34	0.882	14.593	2810	1.425	0.702	0.947
269	NCS1_KAN622-15_2.tif:0004-0473	1.153	84.167	0	419	76.805	34.154	0.896	97.034	18685	1.483	0.674	0.967
270	NCS1_KAN622-15_2.tif:0005-0518	1.065	92.771	0	633	2.52	37.404	0.863	98.763	19018	1.306	0.766	0.94
271	NCS1_KAN622-15_2.tif:0006-0602	0.826	15.692	0	181	53.37	43.444	0.896	12.957	2495	1.276	0.784	0.933
272	NCS1_KAN622-15_2.tif:0007-0748	0.846	111.773	0	773	23.262	53.931	0.875	94.614	18219	1.308	0.764	0.939
273	NCS1_KAN622-15_2.tif:0008-0946	0.966	71.93	0	618	28.851	68.215	0.852	69.479	13379	1.189	0.841	0.935
274	NCS1_KAN622-15_3.tif:0001-0062	1.085	61.589	0	352	41.424	4.511	0.836	66.846	12872	1.283	0.78	0.905
275	NCS1_KAN622-15_3.tif:0002-0239	1.158	66.215	0	592	21.126	17.223	0.799	76.682	14766	1.475	0.678	0.929
276	NCS1_KAN622-15_3.tif:0003-0353	1.168	80.756	0	696	49.107	25.522	0.823	94.359	18170	1.242	0.805	0.913
277	NCS1_KAN622-15_3.tif:0004-0586	1.215	213.842	0	1569	69.56	42.298	0.785	259.86	50039	1.14	0.877	0.903
278	NCS1_KAN622-15_3.tif:0005-0730	1.392	97.272	0	1237	79.056	52.691	0.859	135.38	26069	1.181	0.847	0.934
279	NCS1_KAN622-15_3.tif:0006-0775	1.132	54.849	0	565	22.315	55.826	0.813	62.094	11957	1.626	0.615	0.91
280	NCS1_KAN622-15_4.tif:0001-0142	0.8	12.558	0	129	69.592	10.239	0.899	10.044	1934	1.134	0.882	0.942
281	NCS1_KAN622-15_4.tif:0002-0183	1.153	140.829	0	1384	33.882	13.159	0.835	162.359	31264	1.408	0.71	0.927
282	NCS1_KAN622-15_4.tif:0003-0467	1.283	109.13	0	909	53.472	33.643	0.831	139.981	26955	1.409	0.71	0.903
283	NCS1_KAN622-15_4.tif:0004-0495	1.049	113.906	0	836	80.336	35.663	0.858	119.489	23009	1.312	0.762	0.935
284	NCS1_KAN622-15_4.tif:0005-0593	0.784	22.238	0	90	10.136	42.725	0.882	17.439	3358	1.492	0.67	0.947
285	NCS1_KAN622-15_4.tif:0006-0868	0.706	74.051	0	323	56.993	62.575	0.877	52.3	10071	1.162	0.86	0.938
286	NCS1_KAN622-15_4.tif:0007-0994	0.691	24.173	0	118	25.387	71.684	0.957	16.696	3215	1.145	0.873	0.95
287	NCS1_KAN622-15_5.tif:0001-0128	1.158	55.314	0	331	29.112	9.241	0.856	64.057	12335	1.447	0.691	0.935
288	NCS1_KAN622-15_5.tif:0002-0561	1.111	137.248	0	1114	86.229	40.447	0.909	152.528	29371	1.13	0.885	0.957
289	NCS1_KAN622-15_5.tif:0003-0716	0.821	45.57	0	227	16.682	51.608	0.923	37.391	7200	1.166	0.857	0.958
290	NCS1_KAN622-15_5.tif:0004-0876	1.179	65.344	0	601	79.113	63.054	0.798	77.03	14833	1.248	0.802	0.912
291	NCS1_KAN622-15_5.tif:0005-0893	0.94	93.702	0	771	24.141	64.309	0.867	88.076	16960	1.278	0.782	0.916
292	NCS1_KAN622-15_6.tif:0001-0161	0.95	120.355	0	671	85.754	11.604	0.897	114.379	22025	1.211	0.826	0.927
293	NCS1_KAN622-15_6.tif:0002-0193	1.065	87.98	0	487	73.724	13.898	0.939	93.664	18036	1.182	0.846	0.972
294	NCS1_KAN622-15_6.tif:0003-0373	0.685	77.879	0	463	17.802	26.88	0.741	53.386	10280	2.134	0.469	0.936
295	NCS1_KAN622-15_6.tif:0004-0502	1.065	84.712	0	729	37.297	36.227	0.735	90.184	17366	1.724	0.58	0.872
296	NCS1_KAN622-15_6.tif:0005-0650	0.639	13.87	0	100	13.989	46.879	0.921	8.86	1706	1.204	0.831	0.946
297	NCS1_KAN622-15_6.tif:0006-0652	0.701	74.311	0	296	78.879	47.016	0.929	52.098	10032	1.198	0.835	0.978
298	NCS1_KAN622-15_6.tif:0007-0663	0.706	144.265	0	732	0.76	47.749	0.854	101.89	19620	1.519	0.658	0.961
299	NCS1_KAN622-15_6.tif:0008-0721	1.553	94.328	0	868	61.465	51.922	0.806	146.468	28204	1.276	0.784	0.895
300	NCS1_KAN622-15_6.tif:0009-0890	0.94	45.873	0	335	2.991	64.126	0.867	43.119	8303	1.184	0.844	0.91
301	NCS1_KAN622-15_6.tif:0010-0919	1.096	103.18	0	814	72.097	66.251	0.787	113.06	21771	1.723	0.58	0.892
										17423
302	NCS1_KAN622-16_1.tif:0001-0101	0.68	79.817	0	392	50.204	7.257	0.902	54.3	10456	1.151	0.869	0.963
303	NCS1_KAN622-16_1.tif:0002-0151	1.075	92.198	0	575	62.565	10.932	0.716	99.111	19085	2.003	0.499	0.859
304	NCS1_KAN622-16_1.tif:0003-0166	1.47	89.53	0	796	71.112	12.018	0.742	131.579	25337	2.097	0.477	0.929
305	NCS1_KAN622-16_1.tif:0004-0257	1.215	55.397	0	526	30.532	18.506	0.825	67.319	12963	1.33	0.752	0.891
306	NCS1_KAN622-16_1.tif:0005-0471	1.023	112.497	0	743	42.606	33.958	0.894	115.091	22162	1.066	0.938	0.94
307	NCS1_KAN622-16_1.tif:0006-0756	0.696	22.119	0	213	13.182	54.445	0.842	15.392	2964	1.349	0.741	0.954
308	NCS1_KAN622-16_1.tif:0007-0891	0.95	136.273	0	727	45.675	64.207	0.812	129.507	24938	1.483	0.674	0.904
309	NCS1_KAN622-16_1.tif:0008-0956	0.649	5.496	0	39	17.037	68.912	0.841	3.568	687	1.695	0.59	0.926
310	NCS1_KAN622-16_2.tif:0001-0120	1.039	108.6	0	741	26.059	8.711	0.899	112.795	21720	1.294	0.773	0.924
311	NCS1_KAN622-16_2.tif:0002-0135	0.587	37.619	0	176	84.679	9.751	0.919	22.076	4251	1.186	0.843	0.974
312	NCS1_KAN622-16_2.tif:0003-0322	1.298	55.92	0	422	71.207	23.209	0.708	72.6	13980	1.753	0.571	0.855
313	NCS1_KAN622-16_2.tif:0004-0445	0.924	48.494	0	199	84.539	32.061	0.845	44.827	8632	1.301	0.769	0.89
314	NCS1_KAN622-16_2.tif:0005-0536	1.002	86.016	0	628	34.119	38.65	0.813	86.211	16601	1.543	0.648	0.902
315	NCS1_KAN622-16_2.tif:0006-0587	0.862	54.928	0	316	15.794	42.301	0.87	47.351	9118	1.587	0.63	0.951
316	NCS1_KAN622-16_2.tif:0007-0604	1.007	70.325	0	356	52.564	43.543	0.79	70.85	13643	1.84	0.543	0.951
317	NCS1_KAN622-16_2.tif:0008-0639	1.402	95.5	0	869	79.387	46.032	0.792	133.905	25785	1.604	0.623	0.914
318	NCS1_KAN622-16_2.tif:0009-0830	0.93	81.81	0	532	21.089	59.859	0.761	76.048	14644	1.555	0.643	0.871
319	NCS1_KAN622-16_3.tif:0001-0075	1.563	66.037	0	570	30.871	5.34	0.748	103.224	19877	1.451	0.689	0.867
320	NCS1_KAN622-16_3.tif:0002-0108	0.639	49.041	0	268	83.324	7.801	0.885	31.325	6032	1.451	0.689	0.928
321	NCS1_KAN622-16_3.tif:0003-0111	1.246	84.208	0	744	47.372	7.989	0.87	104.953	20210	1.458	0.686	0.921
322	NCS1_KAN622-16_3.tif:0004-0121	1.148	81.855	0	622	40.993	8.711	0.877	93.944	18090	1.205	0.83	0.909
323	NCS1_KAN622-16_3.tif:0005-0411	1.049	98.386	0	558	47.507	29.642	0.88	103.209	19874	1.214	0.823	0.896
324	NCS1_KAN622-16_3.tif:0006-0521	1.184	102.351	0	797	8.851	37.532	0.868	121.187	23336	1.139	0.878	0.927
325	NCS1_KAN622-16_3.tif:0007-0593	0.94	71.956	0	449	3.275	42.755	0.917	67.636	13024	1.213	0.825	0.948
326	NCS1_KAN622-16_3.tif:0008-0879	0.758	20.486	0	82	80.478	63.324	0.875	15.533	2991	1.507	0.664	0.936
327	NCS1_KAN622-16_3.tif:0009-0918	1.397	90.632	0	884	33.942	66.164	0.678	126.609	24380	2.354	0.425	0.882
328	NCS1_KAN622-16_4.tif:0001-0031	1.423	82.854	0	792	70.887	2.244	0.776	117.895	22702	1.405	0.712	0.894
329	NCS1_KAN622-16_4.tif:0002-0035	1.49	90.934	0	949	90.693	2.594	0.793	135.531	26098	1.522	0.657	0.895
330	NCS1_KAN622-16_4.tif:0003-0039	0.53	49.392	0	272	7.759	2.827	0.968	26.163	5038	1.167	0.857	0.949
331	NCS1_KAN622-16_4.tif:0004-0152	0.8	121.649	0	726	59.292	11.031	0.847	97.288	18734	1.253	0.798	0.911
332	NCS1_KAN622-16_4.tif:0005-0195	0.867	126.06	0	781	65.358	14.061	0.875	109.326	21052	1.148	0.871	0.938
333	NCS1_KAN622-16_4.tif:0006-0214	1.428	82.745	0	778	87.398	15.401	0.787	118.17	22755	1.639	0.61	0.891
334	NCS1_KAN622-16_4.tif:0007-0301	1.013	108.015	0	855	33.954	21.645	0.877	109.383	21063	1.02	0.98	0.897
335	NCS1_KAN622-16_4.tif:0008-0488	0.919	127.989	0	813	39.267	35.185	0.964	117.646	22654	1.102	0.908	0.949
336	NCS1_KAN622-16_4.tif:0009-0601	1.127	84.853	0	677	16.517	43.37	0.879	95.621	18413	1.161	0.861	0.918
337	NCS1_KAN622-16_4.tif:0010-0665	1.532	69.817	0	771	63.845	47.853	0.75	106.958	20596	1.243	0.804	0.863
338	NCS1_KAN622-16_4.tif:0011-0681	0.888	53.942	0	297	29.232	49.016	0.783	47.902	9224	1.543	0.648	0.902
339	NCS1_KAN622-16_4.tif:0012-0746	1.241	71.28	0	575	82.357	53.729	0.795	88.47	17036	1.515	0.66	0.895
340	NCS1_KAN622-16_4.tif:0013-0867	1.257	59.062	0	509	51.023	62.495	0.834	74.226	14293	1.869	0.535	0.966
341	NCS1_KAN622-16_5.tif:0001-0222	0.95	86.246	0	538	73.822	16.032	0.897	81.963	15783	1.049	0.953	0.922
342	NCS1_KAN622-16_5.tif:0002-0299	0.722	89.324	0	455	23.251	21.606	0.82	64.478	12416	1.589	0.629	0.939
343	NCS1_KAN622-16_5.tif:0003-0415	1.091	80.838	0	489	40.474	29.936	0.866	88.159	16976	1.562	0.64	0.935
344	NCS1_KAN622-16_5.tif:0004-0493	0.54	6.317	0	24	17.256	35.558	0.956	3.412	657	1.416	0.706	0.954
345	NCS1_KAN622-16_5.tif:0005-0643	1.252	66.49	0	558	73.219	46.257	0.781	83.215	16024	1.49	0.671	0.878
346	NCS1_KAN622-16_5.tif:0006-0666	0.758	78.041	0	492	21.342	48.027	0.894	59.171	11394	1.123	0.89	0.97
347	NCS1_KAN622-16_5.tif:0007-0697	1.07	76.82	0	613	11.061	50.257	0.849	82.182	15825	1.382	0.724	0.928
348	NCS1_KAN622-16_5.tif:0008-0852	0.815	93.166	0	514	37.939	61.432	0.941	75.96	14627	1.12	0.893	0.952
349	NCS1_KAN622-16_6.tif:0001-0078	1.189	23.996	0	140	84.687	5.652	0.864	28.536	5495	1.633	0.612	0.929
350	NCS1_KAN622-16_6.tif:0002-0196	1.335	91.86	0	848	9.067	14.076	0.717	122.6	23608	1.737	0.576	0.847
351	NCS1_KAN622-16_6.tif:0003-0253	1.371	68.875	0	733	25.03	18.254	0.747	94.427	18183	1.982	0.505	0.921
352	NCS1_KAN622-16_6.tif:0004-0362	1.215	58.949	0	492	9.225	26.091	0.764	71.634	13794	1.462	0.684	0.865
353	NCS1_KAN622-16_6.tif:0005-0400	0.795	9.072	0	53	88.019	28.884	0.917	7.208	1388	1.285	0.778	0.947
354	NCS1_KAN622-16_6.tif:0006-0436	0.696	18.858	0	142	60.95	31.399	0.811	13.123	2527	1.268	0.788	0.899
355	NCS1_KAN622-16_6.tif:0007-0616	1.61	66.713	0	662	13.867	44.311	0.697	107.399	20681	1.466	0.682	0.833
356	NCS1_KAN622-16_6.tif:0008-0692	1.153	72.734	0	555	8.925	49.836	0.881	83.854	16147	1.286	0.778	0.921
357	NCS1_KAN622-16_6.tif:0009-0886	0.691	65.098	0	267	58.576	63.882	0.858	44.962	8658	1.398	0.715	0.933
358	NCS1_KAN622-16_7.tif:0001-0034	0.789	138.263	0	828	64.649	2.483	0.897	109.139	21016	1.051	0.952	0.953
359	NCS1_KAN622-16_7.tif:0002-0113	1.168	115.951	0	1246	44.423	8.145	0.829	135.484	26089	1.56	0.641	0.934
360	NCS1_KAN622-16_7.tif:0003-0311	0.997	36.708	0	234	70.395	22.417	0.871	36.601	7048	1.057	0.946	0.919
361	NCS1_KAN622-16_7.tif:0004-0351	1.283	80.198	0	764	57.282	25.339	0.779	102.871	19809	1.668	0.599	0.884
362	NCS1_KAN622-16_7.tif:0005-0492	1.278	127.996	0	1168	84.484	35.454	0.816	163.517	31487	1.555	0.643	0.944
363	NCS1_KAN622-16_7.tif:0006-0548	0.997	72.323	0	628	25.273	39.508	0.826	72.112	13886	1.527	0.655	0.908
364	NCS1_KAN622-16_7.tif:0007-0634	0.982	126.656	0	1008	55.74	45.769	0.821	124.314	23938	1.265	0.79	0.909
365	NCS1_KAN622-16_7.tif:0008-0785	1.127	83.092	0	542	67.109	56.575	0.876	93.638	18031	1.185	0.844	0.931
366	NCS1_KAN622-16_7.tif:0009-0845	0.779	58.147	0	374	0.779	60.925	0.709	45.295	8722	1.776	0.563	0.852
367	NCS1_KAN622-16_7.tif:0010-0902	0.758	97.979	0	509	15.425	65.047	0.84	74.288	14305	1.402	0.713	0.948
										15650.8

## Sheet: IF condition
				Primary antibody for Alexa488	Primary antibody for Alexa568	Primary antibody for Alexa647	Nuclear staining		Date
KAN622-1	RPE-BFP-Cas9 pMCB306 (pool)		Serum starved for 24 hours. Fixed in 100% methanol at -20C for 5 minutes.	NCS1, Cell Signaling, 8237P, 1:500	CEP170, Invitrogen, 41-3200, 1:1000	Ac-Tub, 6B-11, Santa Cruz, 1:1000	DAPI	No.6	2021-03-04
KAN622-2	RPE-BFP-Cas9 CEP164KO (pool)		Serum starved for 24 hours. Fixed in 100% methanol at -20C for 5 minutes.	NCS1, Cell Signaling, 8237P, 1:500	CEP170, Invitrogen, 41-3200, 1:1000	Ac-Tub, 6B-11, Santa Cruz, 1:1000	DAPI	No.6	2021-03-04
KAN622-3	RPE-BFP-Cas9 CEP83 KO (pool)		Serum starved for 24 hours. Fixed in 100% methanol at -20C for 5 minutes.	NCS1, Cell Signaling, 8237P, 1:500	CEP170, Invitrogen, 41-3200, 1:1000	Ac-Tub, 6B-11, Santa Cruz, 1:1000	DAPI	No.6	2021-03-04
KAN622-4	RPE-BFP-Cas9 SCLT1 KO (pool)		Serum starved for 24 hours. Fixed in 100% methanol at -20C for 5 minutes.	NCS1, Cell Signaling, 8237P, 1:500	CEP170, Invitrogen, 41-3200, 1:1000	Ac-Tub, 6B-11, Santa Cruz, 1:1000	DAPI	No.6	2021-03-04
KAN622-5	RPE-BFP-Cas9 FBF1 KO (pool)		Serum starved for 24 hours. Fixed in 100% methanol at -20C for 5 minutes.	NCS1, Cell Signaling, 8237P, 1:500	CEP170, Invitrogen, 41-3200, 1:1000	Ac-Tub, 6B-11, Santa Cruz, 1:1000	DAPI	No.6	2021-03-04
KAN622-6	RPE-BFP-Cas9 CEP89KO (pool)		Serum starved for 24 hours. Fixed in 100% methanol at -20C for 5 minutes.	NCS1, Cell Signaling, 8237P, 1:500	CEP170, Invitrogen, 41-3200, 1:1000	Ac-Tub, 6B-11, Santa Cruz, 1:1000	DAPI	No.6	2021-03-04
KAN622-7	RPE-BFP-Cas9 CCDC92 KO (pool)		Serum starved for 24 hours. Fixed in 100% methanol at -20C for 5 minutes.	NCS1, Cell Signaling, 8237P, 1:500	CEP170, Invitrogen, 41-3200, 1:1000	Ac-Tub, 6B-11, Santa Cruz, 1:1000	DAPI	No.6	2021-03-04
KAN622-8	RPE-BFP-Cas9 ANKRD26 KO (pool)		Serum starved for 24 hours. Fixed in 100% methanol at -20C for 5 minutes.	NCS1, Cell Signaling, 8237P, 1:500	CEP170, Invitrogen, 41-3200, 1:1000	Ac-Tub, 6B-11, Santa Cruz, 1:1000	DAPI	No.6	2021-03-04
KAN622-9	RPE-BFP-Cas9 TTBK2 KO (pool)		Serum starved for 24 hours. Fixed in 100% methanol at -20C for 5 minutes.	NCS1, Cell Signaling, 8237P, 1:500	CEP170, Invitrogen, 41-3200, 1:1000	Ac-Tub, 6B-11, Santa Cruz, 1:1000	DAPI	No.6	2021-03-04
KAN622-10	RPE-BFP-Cas9 INPP5E KO (pool)		Serum starved for 24 hours. Fixed in 100% methanol at -20C for 5 minutes.	NCS1, Cell Signaling, 8237P, 1:500	CEP170, Invitrogen, 41-3200, 1:1000	Ac-Tub, 6B-11, Santa Cruz, 1:1000	DAPI	No.6	2021-03-04
KAN622-11	RPE-BFP-Cas9 Kiz KO (pool)		Serum starved for 24 hours. Fixed in 100% methanol at -20C for 5 minutes.	NCS1, Cell Signaling, 8237P, 1:500	CEP170, Invitrogen, 41-3200, 1:1000	Ac-Tub, 6B-11, Santa Cruz, 1:1000	DAPI	No.6	2021-03-04
KAN622-12	RPE-BFP-Cas9 LRRC45 KO (pool)		Serum starved for 24 hours. Fixed in 100% methanol at -20C for 5 minutes.	NCS1, Cell Signaling, 8237P, 1:500	CEP170, Invitrogen, 41-3200, 1:1000	Ac-Tub, 6B-11, Santa Cruz, 1:1000	DAPI	No.6	2021-03-04
KAN622-13	RPE-BFP-Cas9 NCS1 KO (pool)		Serum starved for 24 hours. Fixed in 100% methanol at -20C for 5 minutes.	NCS1, Cell Signaling, 8237P, 1:500	CEP170, Invitrogen, 41-3200, 1:1000	Ac-Tub, 6B-11, Santa Cruz, 1:1000	DAPI	No.6	2021-03-04
KAN622-14	RPE-BFP-Cas9 C3orf14 KO (pool)		Serum starved for 24 hours. Fixed in 100% methanol at -20C for 5 minutes.	NCS1, Cell Signaling, 8237P, 1:500	CEP170, Invitrogen, 41-3200, 1:1000	Ac-Tub, 6B-11, Santa Cruz, 1:1000	DAPI	No.6	2021-03-04
KAN622-15	RPE-BFP-Cas9 FOP KO (pool)		Serum starved for 24 hours. Fixed in 100% methanol at -20C for 5 minutes.	NCS1, Cell Signaling, 8237P, 1:500	CEP170, Invitrogen, 41-3200, 1:1000	Ac-Tub, 6B-11, Santa Cruz, 1:1000	DAPI	No.6	2021-03-04
KAN622-16	RPE-BFP-Cas9 sgSafe (pool)		Serum starved for 24 hours. Fixed in 100% methanol at -20C for 5 minutes.	NCS1, Cell Signaling, 8237P, 1:500	CEP170, Invitrogen, 41-3200, 1:1000	Ac-Tub, 6B-11, Santa Cruz, 1:1000	DAPI	No.6	2021-03-04
