# Supplementary material for: Myristoylated Neuronal Calcium Sensor-1 captures the preciliary vesicle at distal appendages
Source: eLife. 2025 Jan 30;14:e85998. doi: 10.7554/eLife.85998 (PMC11984960; doi:10.7554/eLife.85998)
Supplement: Figure 2—source data 1. [file elife-85998-fig2-data1.xlsx]

## Sheet: IF condition
Exp. number	Cell line	Culture condition	Fixation condition	rabbit-Alexa488	mouse IgG1-Alexa568	mouse IgG2b-Alexa647	Nuclear stain	Date	Replicate
KAN355-1	RPE-BFP-Cas9 pMCB306 (pool)		Fixed in 4% PFA/serum starvation for 24 hours	NCS1, Cell Signaling, 8237P, 1:1000	CEP170, Invitrogen, 41-3200, 1:1000	Ac-Tub, 6B-11, SIGMA, 1:2000	DAPI
KAN355-5	RPE-BFP-Cas9 NCS1KO (pool)		Fixed in 4% PFA/serum starvation for 24 hours	NCS1, Cell Signaling, 8237P, 1:1000	CEP170, Invitrogen, 41-3200, 1:1000	Ac-Tub, 6B-11, SIGMA, 1:2000	DAPI
