# Supplementary material for: Myristoylated Neuronal Calcium Sensor-1 captures the preciliary vesicle at distal appendages
Source: eLife. 2025 Jan 30;14:e85998. doi: 10.7554/eLife.85998 (PMC11984960; doi:10.7554/eLife.85998)
Supplement: Figure 2—source data 2. [file elife-85998-fig2-data2.xlsx]

## Sheet: IF condition
Exp. number	Cell line	Culture condition	Fixation condition	Chicken-Alexa488	Mouse-Alexa568	Rabbit-Alexa647	Nuclear stain	Date	Replicate
KAN160-2	RPE-FRT9	LAP7-hC3orf14	Fixed with 4% PFA/ 24 hours serum starvation/structured illumination	chicken anti GFP, Invitrogen, 1:1000	Ac-Tub, 6B-11, SIGMA, 1:1000	Pericentrin, ab4448, Abcam, 1:1000	DAPI	A2623
