# Supplementary material for: Myristoylated Neuronal Calcium Sensor-1 captures the preciliary vesicle at distal appendages
Source: eLife. 2025 Jan 30;14:e85998. doi: 10.7554/eLife.85998 (PMC11984960; doi:10.7554/eLife.85998)
Supplement: Figure 2—source data 3. [file elife-85998-fig2-data3.xlsx]

## Sheet: Raw data
	Label	Area	Mean	Min	Max	X	Y	Circ	IntDen	RawIntDen	AR	Round	Solidity
1	NCS1_KAN654-1_1.tif:0001-0066	3.491	5.793	0	25	112.967	7.539	0.933	20.225	1570	1.197	0.836	0.919	0.631662
2	NCS1_KAN654-1_1.tif:0002-0184	1.855	6.16	0	32	64.989	20.899	0.98	11.427	887	1.088	0.919	0.97	0.356869
3	NCS1_KAN654-1_1.tif:0003-0239	1.572	10.557	0	49	16.698	27.192	0.898	16.592	1288	1.189	0.841	0.964	0.518204
4	NCS1_KAN654-1_1.tif:0004-0243	1.791	35.403	0	300	111.017	27.598	0.935	63.394	4921	1.266	0.79	0.933	1.97988
5	NCS1_KAN654-1_1.tif:0005-0343	1.971	5.314	0	27	65.452	39.006	0.941	10.473	813	1.451	0.689	0.953	0.327096
6	NCS1_KAN654-1_1.tif:0006-0363	2.615	7.862	0	43	53.905	41.112	0.84	20.56	1596	1.458	0.686	0.9	0.642122
7	NCS1_KAN654-1_1.tif:0007-0380	1.456	10.027	0	54	33.801	43.197	0.964	14.596	1133	1.257	0.796	0.958	0.455843
8	NCS1_KAN654-1_1.tif:0008-0411	2.048	18.075	0	228	88.996	46.682	0.896	37.024	2874	1.225	0.816	0.935	1.1563
9	NCS1_KAN654-1_1.tif:0009-0449	2.216	6.86	0	36	57.061	50.956	0.96	15.201	1180	1.071	0.934	0.94	0.474752
10	NCS1_KAN654-1_1.tif:0010-0517	1.881	25.007	0	215	17.502	58.712	0.946	47.033	3651	1.083	0.923	0.927	1.46892
11	NCS1_KAN654-1_1.tif:0011-0557	1.855	7.826	0	35	142.134	63.301	0.969	14.518	1127	1.012	0.988	0.95	0.453429
12	NCS1_KAN654-1_1.tif:0012-0624	1.791	21.101	0	111	71.701	70.879	0.935	37.784	2933	1.193	0.838	0.936	1.18004
13	NCS1_KAN654-1_1.tif:0013-0679	2.254	39.52	0	332	125.239	77.13	0.866	89.094	6916	1.505	0.665	0.951	2.78253
14	NCS1_KAN654-1_1.tif:0014-0725	1.739	6.407	0	26	60.409	82.347	0.944	11.143	865	1.108	0.902	0.947	0.348017
15	NCS1_KAN654-1_1.tif:0015-0801	2.177	29.556	0	370	138.012	90.974	0.898	64.347	4995	1.196	0.836	0.926	2.00965
16	NCS1_KAN654-1_1.tif:0016-0839	1.855	11.562	0	76	116.405	95.306	0.943	21.449	1665	1.236	0.809	0.95	0.669883
17	NCS1_KAN654-1_1.tif:0017-0857	2.048	11.786	0	84	31.743	97.287	0.896	24.141	1874	1.264	0.791	0.933	0.753971
18	NCS1_KAN654-1_1.tif:0018-0938	1.804	47.15	0	472	101.938	106.428	0.917	85.036	6601	1.193	0.838	0.94	2.6558
19	NCS1_KAN654-1_1.tif:0019-1059	2.512	7.297	0	41	19.032	120.167	0.896	18.331	1423	1.323	0.756	0.92	0.572519
20	NCS1_KAN654-1_1.tif:0020-1070	1.52	28.093	0	182	79.687	121.506	0.92	42.705	3315	1.123	0.891	0.952	1.33373
21	NCS1_KAN654-1_1.tif:0021-1092	1.752	7.074	0	43	33.893	123.998	0.967	12.393	962	1.185	0.844	0.935	0.387044
22	NCS1_KAN654-1_1.tif:0022-1135	1.726	4.627	0	24	132.16	128.841	0.964	7.987	620	1.248	0.801	0.95	0.249446
23	NCS1_KAN654-1_1.tif:0023-1153	2.01	24.263	0	201	84.174	130.895	0.925	48.759	3785	1.347	0.742	0.937	1.52283
24	NCS1_KAN654-1_1.tif:0024-1154	1.366	8.755	0	51	25.593	131.056	0.975	11.955	928	1.021	0.979	0.946	0.373364
25	NCS1_KAN654-1_2.tif:0001-0032	2.126	6.145	0	27	46.539	3.658	0.964	13.063	1014	1.08	0.926	0.971	0.407965
26	NCS1_KAN654-1_2.tif:0002-0101	1.688	30.779	0	280	6.99	11.435	0.969	51.941	4032	1.153	0.867	0.942	1.6222
27	NCS1_KAN654-1_2.tif:0003-0141	1.765	6.956	0	31	131.602	16.029	0.958	12.277	953	1.095	0.913	0.955	0.383423
28	NCS1_KAN654-1_2.tif:0004-0207	1.623	17.087	0	63	61.177	23.519	0.971	27.735	2153	1.131	0.885	0.951	0.866222
29	NCS1_KAN654-1_2.tif:0005-0262	2.28	36.379	0	249	114.708	29.826	0.856	82.949	6439	1.495	0.669	0.959	2.59062
30	NCS1_KAN654-1_2.tif:0006-0308	1.855	5.889	0	29	49.912	35.018	0.943	10.924	848	1.115	0.897	0.941	0.341178
31	NCS1_KAN654-1_2.tif:0007-0378	1.507	3.94	0	20	135.88	42.965	0.968	5.939	461	1.125	0.889	0.959	0.185475
32	NCS1_KAN654-1_2.tif:0008-0385	1.984	27.955	0	346	127.46	43.734	0.913	55.458	4305	1.337	0.748	0.936	1.73204
33	NCS1_KAN654-1_2.tif:0009-0423	1.907	12.027	0	75	105.845	48.011	0.959	22.93	1780	1.209	0.827	0.937	0.716152
34	NCS1_KAN654-1_2.tif:0010-0440	2.164	9.613	0	85	21.216	49.946	0.915	20.805	1615	1.255	0.797	0.933	0.649767
35	NCS1_KAN654-1_2.tif:0011-0521	1.868	53.124	0	607	91.404	59.105	0.925	99.232	7703	1.212	0.825	0.951	3.09917
36	NCS1_KAN654-1_2.tif:0012-0641	2.551	8.672	0	51	8.492	72.833	0.898	22.119	1717	1.409	0.71	0.941	0.690805
37	NCS1_KAN654-1_2.tif:0013-0653	1.572	26.779	0	187	69.13	74.159	0.94	42.086	3267	1.118	0.894	0.942	1.31442
38	NCS1_KAN654-1_2.tif:0014-0675	1.816	8.163	0	49	23.337	76.668	0.975	14.827	1151	1.164	0.859	0.943	0.463085
39	NCS1_KAN654-1_2.tif:0015-0719	1.868	4.959	0	25	121.65	81.584	0.95	9.262	719	1.159	0.863	0.948	0.289277
40	NCS1_KAN654-1_2.tif:0016-0736	2.126	33.315	0	288	73.627	83.591	0.954	70.814	5497	1.319	0.758	0.954	2.21162
41	NCS1_KAN654-1_2.tif:0017-0738	1.572	10.344	0	52	15.074	83.768	0.968	16.257	1262	1.034	0.967	0.942	0.507743
42	NCS1_KAN654-1_2.tif:0018-0974	1.778	10.014	0	70	109.345	110.536	0.89	17.803	1382	1.115	0.897	0.948	0.556023
43	NCS1_KAN654-1_2.tif:0019-0985	1.327	4.796	0	20	22.355	111.85	0.96	6.364	494	1.094	0.914	0.967	0.198752
44	NCS1_KAN654-1_2.tif:0020-1076	1.855	6.5	0	41	40.178	122.089	0.943	12.058	936	1.152	0.868	0.944	0.376583
45	NCS1_KAN654-1_3.tif:0001-0008	1.945	23.199	0	211	80.971	0.956	0.938	45.127	3503	1.143	0.875	0.962	1.40937
46	NCS1_KAN654-1_3.tif:0002-0137	2.319	24.161	0	240	35.779	15.65	0.903	56.025	4349	1.45	0.69	0.952	1.74974
47	NCS1_KAN654-1_3.tif:0003-0175	2.422	25.096	0	282	59.185	20.004	0.853	60.778	4718	1.239	0.807	0.928	1.8982
48	NCS1_KAN654-1_3.tif:0004-0175	1.778	7.717	0	44	1.337	19.943	0.914	13.72	1065	1.202	0.832	0.948	0.428484
49	NCS1_KAN654-1_3.tif:0005-0190	1.494	6.267	0	29	6.7	21.612	0.989	9.365	727	1.139	0.878	0.951	0.292496
50	NCS1_KAN654-1_3.tif:0006-0319	2.164	31.893	0	258	71.099	36.236	0.924	69.023	5358	1.156	0.865	0.949	2.1557
51	NCS1_KAN654-1_3.tif:0007-0371	2.254	26.606	0	245	32.028	42.154	0.866	59.98	4656	1.33	0.752	0.938	1.87326
52	NCS1_KAN654-1_3.tif:0008-0401	2.267	25.881	0	208	82.534	45.557	0.935	58.679	4555	1.267	0.789	0.944	1.83262
53	NCS1_KAN654-1_3.tif:0009-0417	2.151	17.82	0	226	136.731	47.408	0.941	38.338	2976	1.144	0.874	0.954	1.19734
54	NCS1_KAN654-1_3.tif:0010-0432	1.791	5.504	0	44	0.977	49.043	0.887	9.855	765	1.355	0.738	0.93	0.307784
55	NCS1_KAN654-1_3.tif:0011-0444	2.113	24.384	0	137	52.159	50.445	0.925	51.516	3999	1.197	0.835	0.943	1.60893
56	NCS1_KAN654-1_3.tif:0012-0536	2.602	29.277	0	349	103.016	60.867	0.861	76.186	5914	1.46	0.685	0.904	2.37939
57	NCS1_KAN654-1_3.tif:0013-0549	1.417	4.218	0	25	42.688	62.4	0.713	5.977	464	2.285	0.438	0.853	0.186682
58	NCS1_KAN654-1_3.tif:0014-0554	2.448	22.937	0	295	89.011	62.917	0.843	56.141	4358	1.175	0.851	0.907	1.75336
59	NCS1_KAN654-1_3.tif:0015-0633	2.345	13.225	0	180	14.946	71.998	0.75	31.008	2407	1.513	0.661	0.863	0.968414
60	NCS1_KAN654-1_3.tif:0016-0731	2.138	34.524	0	407	30.503	82.992	0.936	73.828	5731	1.047	0.955	0.949	2.30577
61	NCS1_KAN654-1_3.tif:0017-0775	2.023	4.605	0	26	74.567	87.953	0.941	9.314	723	1.176	0.85	0.954	0.290886
62	NCS1_KAN654-1_3.tif:0018-0776	1.855	14.708	0	110	7.31	88.157	0.943	27.285	2118	1.065	0.939	0.944	0.85214
63	NCS1_KAN654-1_3.tif:0019-0858	2.409	8.235	0	40	89.061	97.42	0.938	19.839	1540	1.163	0.86	0.952	0.619592
64	NCS1_KAN654-1_3.tif:0020-0882	2.834	17.286	0	171	74.742	99.965	0.652	48.991	3803	1.817	0.55	0.83	1.53007
65	NCS1_KAN654-1_3.tif:0021-0944	1.636	6.52	0	30	142.338	107.187	0.94	10.667	828	1.256	0.796	0.93	0.333131
66	NCS1_KAN654-1_3.tif:0022-0977	2.151	25.018	0	308	129.912	110.854	0.846	53.822	4178	1.399	0.715	0.92	1.68094
67	NCS1_KAN654-1_3.tif:0023-0993	1.855	5.854	0	33	141.181	112.758	0.919	10.86	843	1.178	0.849	0.938	0.339166
68	NCS1_KAN654-1_3.tif:0024-1038	2.37	28.826	0	283	108.867	117.761	0.817	68.327	5304	1.193	0.838	0.911	2.13397
69	NCS1_KAN654-1_3.tif:0025-1061	1.868	6.145	0	62	56.957	120.473	0.95	11.478	891	1.11	0.901	0.948	0.358478
70	NCS1_KAN654-1_3.tif:0026-1156	1.739	22.741	0	143	81.586	131.217	0.908	39.549	3070	1.354	0.739	0.928	1.23516
71	NCS1_KAN654-1_3.tif:0027-1259	1.765	35.46	0	348	60.49	142.969	0.932	62.582	4858	1.322	0.756	0.965	1.95453
72	NCS1_KAN654-1_4.tif:0001-0011	1.816	18.794	0	106	19.473	1.317	0.899	34.138	2650	1.315	0.76	0.94	1.06618
73	NCS1_KAN654-1_4.tif:0002-0108	2.229	6.618	0	44	96.66	12.25	0.942	14.75	1145	1.208	0.828	0.94	0.460671
74	NCS1_KAN654-1_4.tif:0003-0152	3.156	7.967	0	46	112.286	17.217	0.871	25.146	1952	1.441	0.694	0.944	0.785353
75	NCS1_KAN654-1_4.tif:0004-0304	2.242	33.592	0	314	134.792	34.561	0.882	75.297	5845	1.052	0.95	0.93	2.35163
76	NCS1_KAN654-1_4.tif:0005-0313	2.126	3.788	0	17	33.595	35.538	0.908	8.051	625	1.421	0.704	0.954	0.251458
77	NCS1_KAN654-1_4.tif:0006-0349	1.945	18.404	0	186	81.959	39.593	0.963	35.8	2779	1.179	0.848	0.965	1.11808
78	NCS1_KAN654-1_4.tif:0007-0393	1.43	6.261	0	33	55.739	44.674	0.947	8.953	695	1.082	0.924	0.929	0.279621
79	NCS1_KAN654-1_4.tif:0008-0497	1.984	11.331	0	88	109.516	56.505	0.923	22.48	1745	1.249	0.8	0.945	0.70207
80	NCS1_KAN654-1_4.tif:0009-0501	2.138	9.416	0	95	4.368	56.938	0.913	20.135	1563	1.136	0.88	0.946	0.628845
81	NCS1_KAN654-1_4.tif:0010-0667	1.932	31.967	0	300	36.797	75.728	0.983	61.77	4795	1.032	0.969	0.965	1.92918
82	NCS1_KAN654-1_4.tif:0011-0689	2.473	5.37	0	40	76.106	78.295	0.826	13.282	1031	1.358	0.736	0.914	0.414805
83	NCS1_KAN654-1_4.tif:0012-0791	2.37	38.527	0	346	106.583	89.843	0.911	91.322	7089	1.317	0.759	0.956	2.85213
84	NCS1_KAN654-1_4.tif:0013-0836	2.306	30.955	0	406	11.805	94.903	0.866	71.381	5541	1.131	0.884	0.935	2.22932
85	NCS1_KAN654-1_4.tif:0014-0876	2.409	23.963	0	276	42.364	99.481	0.83	57.725	4481	1.472	0.679	0.91	1.80285
86	NCS1_KAN654-1_4.tif:0015-0968	1.971	4.889	0	52	141.029	109.894	0.941	9.636	748	1.068	0.936	0.944	0.300945
87	NCS1_KAN654-1_4.tif:0016-1014	2.512	6.503	0	52	53.234	115.114	0.78	16.335	1268	1.872	0.534	0.901	0.510157
88	NCS1_KAN654-1_4.tif:0017-1057	1.301	5.465	0	24	6.181	120.039	0.99	7.111	552	1.143	0.875	0.935	0.222087
89	NCS1_KAN654-1_4.tif:0018-1123	1.881	14.521	0	224	104.107	127.449	0.982	27.31	2120	1.197	0.835	0.957	0.852945
90	NCS1_KAN654-1_4.tif:0019-1163	2.963	10.226	0	61	20.874	132.031	0.912	30.299	2352	1.102	0.908	0.935	0.946286
91	NCS1_KAN654-1_4.tif:0020-1255	1.533	6.042	0	29	47.495	142.449	0.956	9.262	719	1.101	0.908	0.956	0.289277
92	NCS1_KAN654-1_5.tif:0001-0043	3.452	5.086	0	28	107.166	4.838	0.871	17.559	1363	1.535	0.651	0.919	0.548379
93	NCS1_KAN654-1_5.tif:0002-0119	1.894	5.857	0	46	40.675	13.576	0.894	11.092	861	1.232	0.812	0.894	0.346408
94	NCS1_KAN654-1_5.tif:0003-0135	1.804	9.329	0	205	144.373	15.347	0.953	16.824	1306	1.1	0.909	0.962	0.525446
95	NCS1_KAN654-1_5.tif:0004-0294	1.855	7.111	0	37	56.186	33.33	0.919	13.191	1024	1.168	0.856	0.947	0.411988
96	NCS1_KAN654-1_5.tif:0005-0333	1.713	10.406	0	54	97.59	37.8	0.905	17.829	1384	1.082	0.924	0.94	0.556828
97	NCS1_KAN654-1_5.tif:0006-0531	1.868	26.441	0	225	80.414	60.327	0.95	49.391	3834	1.018	0.982	0.945	1.54254
98	NCS1_KAN654-1_5.tif:0007-0536	1.739	6.652	0	76	127.246	60.907	0.944	11.568	898	1.144	0.874	0.947	0.361294
99	NCS1_KAN654-1_5.tif:0008-0585	2.628	5.338	0	31	16.821	66.451	0.909	14.029	1089	1.356	0.738	0.929	0.43814
100	NCS1_KAN654-1_5.tif:0009-0623	3.105	8.481	0	52	51.605	70.74	0.874	26.331	2044	1.179	0.848	0.927	0.822367
101	NCS1_KAN654-1_5.tif:0010-0625	1.816	8.028	0	31	42.463	70.938	0.975	14.583	1132	1.236	0.809	0.946	0.45544
102	NCS1_KAN654-1_5.tif:0011-0647	1.829	7.106	0	43	86.784	73.502	0.956	12.998	1009	1.171	0.854	0.947	0.405953
103	NCS1_KAN654-1_5.tif:0012-0737	1.636	3.583	0	18	130.382	83.637	0.924	5.861	455	1.015	0.985	0.944	0.183061
104	NCS1_KAN654-1_5.tif:0013-0804	2.1	5.902	0	51	83.889	91.245	0.966	12.393	962	1.126	0.888	0.945	0.387044
105	NCS1_KAN654-1_5.tif:0014-0808	1.919	4.081	0	46	25.604	91.806	0.893	7.832	608	1.127	0.887	0.931	0.244618
106	NCS1_KAN654-1_5.tif:0015-0837	1.765	5.015	0	35	50.467	95.056	0.907	8.85	687	1.326	0.754	0.951	0.276402
107	NCS1_KAN654-1_5.tif:0016-0870	2.19	29.812	0	265	113.616	98.747	0.861	65.287	5068	1.281	0.781	0.924	2.03902
108	NCS1_KAN654-1_5.tif:0017-0880	1.855	19.688	0	195	139.285	99.881	0.943	36.521	2835	1.183	0.846	0.944	1.14061
109	NCS1_KAN654-1_5.tif:0018-0948	1.675	7.277	0	63	17.694	107.631	0.935	12.187	946	1.11	0.901	0.929	0.380606
110	NCS1_KAN654-1_5.tif:0019-0965	2.048	22.094	0	163	77.173	109.496	0.896	45.255	3513	1.489	0.672	0.946	1.41339
111	NCS1_KAN654-1_5.tif:0020-1103	1.456	6.991	0	29	14.933	125.184	0.964	10.177	790	1.322	0.756	0.95	0.317843
112	NCS1_KAN654-1_5.tif:0021-1128	2.035	21.665	0	249	104.908	128.089	0.79	44.096	3423	1.552	0.644	0.921	1.37718
113	NCS1_KAN654-1_5.tif:0022-1154	2.306	20.648	0	213	129.364	131.021	0.874	47.613	3696	1.11	0.901	0.965	1.48702
114	NCS1_KAN654-1_5.tif:0023-1215	1.34	5.596	0	32	55.218	137.911	0.939	7.497	582	1.14	0.877	0.977	0.234157
115	NCS1_KAN654-1_6.tif:0001-0042	2.1	6.344	0	29	72.075	4.746	0.942	13.32	1034	1.283	0.779	0.945	0.416012
116	NCS1_KAN654-1_6.tif:0002-0080	2.203	22.509	0	103	36.547	9.096	0.941	49.584	3849	1.334	0.75	0.958	1.54858
117	NCS1_KAN654-1_6.tif:0003-0109	1.971	29.621	0	287	130.208	12.439	0.941	58.382	4532	1.195	0.837	0.944	1.82337
118	NCS1_KAN654-1_6.tif:0004-0223	2.409	10.567	0	132	96.311	25.383	0.888	25.455	1976	1.152	0.868	0.919	0.795009
119	NCS1_KAN654-1_6.tif:0005-0285	2.035	28.867	0	177	20.784	32.33	0.869	58.756	4561	1.448	0.69	0.924	1.83504
120	NCS1_KAN654-1_6.tif:0006-0408	2.087	5.864	0	29	82.937	46.361	0.96	12.238	950	1.124	0.89	0.939	0.382216
121	NCS1_KAN654-1_6.tif:0007-0407	1.481	6.261	0	26	125.343	46.25	0.935	9.275	720	1.042	0.959	0.979	0.289679
122	NCS1_KAN654-1_6.tif:0008-0446	1.855	19.674	0	233	11.11	50.694	0.98	36.495	2833	1.143	0.875	0.973	1.13981
123	NCS1_KAN654-1_6.tif:0009-0621	1.636	13.929	0	194	25.136	70.471	0.909	22.789	1769	1.099	0.91	0.981	0.711726
124	NCS1_KAN654-1_6.tif:0010-0642	1.997	29.626	0	222	129.954	72.937	0.896	59.155	4592	1.117	0.895	0.925	1.84751
125	NCS1_KAN654-1_6.tif:0011-0644	2.164	12.262	0	87	6.422	73.263	0.777	26.537	2060	1.509	0.663	0.928	0.828805
126	NCS1_KAN654-1_6.tif:0012-0684	1.804	19.65	0	133	74.557	77.649	0.968	35.439	2751	1.182	0.846	0.943	1.10682
127	NCS1_KAN654-1_6.tif:0013-0725	1.919	10.678	0	115	77.237	82.339	0.976	20.496	1591	1.083	0.924	0.961	0.640111
128	NCS1_KAN654-1_6.tif:0014-0758	1.971	17.111	0	174	94.535	86	0.917	33.726	2618	1.089	0.918	0.939	1.05331
129	NCS1_KAN654-1_6.tif:0015-0874	1.932	21.287	0	210	80.198	99.216	0.998	41.133	3193	1.195	0.837	0.949	1.28465
130	NCS1_KAN654-1_6.tif:0016-0909	1.739	17.059	0	86	45.531	103.264	0.871	29.668	2303	1.287	0.777	0.951	0.926571
131	NCS1_KAN654-1_6.tif:0017-0932	2.86	9.243	0	80	125.386	105.869	0.768	26.434	2052	1.677	0.596	0.904	0.825586
132	NCS1_KAN654-1_6.tif:0018-0950	2.242	38.19	0	426	60.363	107.868	0.823	85.603	6645	1.558	0.642	0.93	2.6735
133	NCS1_KAN654-1_6.tif:0019-1022	2.01	6.628	0	59	115.99	116.022	0.959	13.32	1034	1.156	0.865	0.951	0.416012
134	NCS1_KAN654-1_6.tif:0020-1072	1.481	28.809	0	221	13.927	121.699	0.897	42.679	3313	1.107	0.904	0.943	1.33293
135	NCS1_KAN654-1_6.tif:0021-1089	1.791	24.59	0	153	21.544	123.56	0.921	44.032	3418	1.211	0.826	0.965	1.37517
136	NCS1_KAN654-1_6.tif:0022-1131	2.126	10.182	0	138	111.912	128.387	0.93	21.642	1680	1.177	0.849	0.946	0.675918
										2485.51				1
137	NCS1_KAN654-2_1.tif:0001-0166	1.391	8.046	0	48	106.988	18.817	0.933	11.195	869	1.233	0.811	0.964	0.349627
138	NCS1_KAN654-2_1.tif:0002-0187	2.319	42.411	0	520	45.599	21.203	0.891	98.343	7634	1.263	0.792	0.95	3.07141
139	NCS1_KAN654-2_1.tif:0003-0221	2.023	33.771	0	205	104.457	25.113	0.941	68.302	5302	1.072	0.933	0.949	2.13317
140	NCS1_KAN654-2_1.tif:0004-0342	2.267	36.96	0	446	85.461	38.822	0.806	83.799	6505	1.439	0.695	0.896	2.61717
141	NCS1_KAN654-2_1.tif:0005-0391	2.061	3.831	0	29	14.512	44.437	0.902	7.897	613	1.251	0.799	0.947	0.24663
142	NCS1_KAN654-2_1.tif:0006-0465	2.576	24.065	0	331	136.278	52.725	0.768	62.002	4813	1.635	0.612	0.901	1.93643
143	NCS1_KAN654-2_1.tif:0007-0516	1.572	5.852	0	51	91.16	58.656	0.968	9.198	714	1.204	0.83	0.949	0.287265
144	NCS1_KAN654-2_1.tif:0008-0553	2.654	32.529	0	412	60.883	62.698	0.744	86.324	6701	1.854	0.539	0.92	2.69603
145	NCS1_KAN654-2_1.tif:0009-0726	2.267	25.875	0	239	135.378	82.422	0.813	58.666	4554	1.692	0.591	0.946	1.83222
146	NCS1_KAN654-2_1.tif:0010-0907	2.448	23.716	0	192	44.94	102.866	0.751	58.047	4506	1.492	0.67	0.886	1.81291
147	NCS1_KAN654-2_1.tif:0011-1019	2.113	34.372	0	263	96.802	115.718	0.902	72.617	5637	1.248	0.801	0.945	2.26795
148	NCS1_KAN654-2_2.tif:0001-0030	2.035	29.5	0	305	10.742	3.556	0.79	60.044	4661	1.379	0.725	0.916	1.87527
149	NCS1_KAN654-2_2.tif:0002-0040	2.203	29.193	0	218	80.119	4.603	0.759	64.308	4992	1.665	0.601	0.87	2.00844
150	NCS1_KAN654-2_2.tif:0003-0047	2.499	25.567	0	153	99.866	5.584	0.682	63.896	4960	1.745	0.573	0.857	1.99557
151	NCS1_KAN654-2_2.tif:0004-0057	1.739	39.607	0	269	19.16	6.514	0.769	68.881	5347	1.57	0.637	0.874	2.15127
152	NCS1_KAN654-2_2.tif:0005-0075	2.164	6.458	0	63	116.745	8.606	0.915	13.977	1085	1.289	0.776	0.936	0.436531
153	NCS1_KAN654-2_2.tif:0006-0114	1.585	3.634	0	20	104.685	13.058	0.729	5.758	447	2.138	0.468	0.857	0.179843
154	NCS1_KAN654-2_2.tif:0007-0296	1.791	29.698	0	281	8.984	33.62	0.921	53.178	4128	1.167	0.857	0.952	1.66083
155	NCS1_KAN654-2_2.tif:0008-0377	3.002	40.948	0	511	108.441	42.829	0.835	122.91	9541	1.705	0.587	0.938	3.83865
156	NCS1_KAN654-2_2.tif:0009-0385	2.589	29.373	0	382	131.568	43.689	0.821	76.057	5904	1.465	0.683	0.895	2.37537
157	NCS1_KAN654-2_2.tif:0010-0530	2.061	8.631	0	37	14.554	60.232	0.85	17.79	1381	1.521	0.658	0.922	0.555621
158	NCS1_KAN654-2_2.tif:0011-0586	1.404	3.294	0	16	144.241	66.567	0.83	4.625	359	1.812	0.552	0.908	0.144437
159	NCS1_KAN654-2_2.tif:0012-0600	1.997	11.742	0	45	142.899	68.105	0.853	23.446	1820	1.583	0.632	0.925	0.732245
160	NCS1_KAN654-2_2.tif:0013-0616	2.576	38.875	0	464	92.73	69.899	0.807	100.16	7775	1.429	0.7	0.905	3.12813
161	NCS1_KAN654-2_2.tif:0014-0680	1.791	38.647	0	367	37.861	77.179	0.946	69.203	5372	1.088	0.919	0.955	2.16133
162	NCS1_KAN654-2_2.tif:0015-0680	2.19	22.288	0	225	46.633	77.119	0.778	48.811	3789	1.7	0.588	0.914	1.52444
163	NCS1_KAN654-2_2.tif:0016-0689	2.383	32.059	0	376	111.59	78.207	0.786	76.405	5931	1.605	0.623	0.902	2.38623
164	NCS1_KAN654-2_2.tif:0017-0889	1.417	5.327	0	33	144.483	100.872	0.95	7.549	586	1.188	0.842	0.965	0.235767
165	NCS1_KAN654-2_2.tif:0018-0923	2.1	26.239	0	279	78.763	104.777	0.919	55.097	4277	1.115	0.897	0.939	1.72078
166	NCS1_KAN654-2_2.tif:0019-0949	1.481	11.609	0	40	107.634	107.696	0.952	17.198	1335	1.299	0.77	0.954	0.537114
167	NCS1_KAN654-2_2.tif:0020-1110	1.739	35.785	0	316	27.191	126.014	0.919	62.234	4831	1.317	0.759	0.957	1.94367
168	NCS1_KAN654-2_2.tif:0021-1146	2.319	30.056	0	344	82.346	130.08	0.806	69.693	5410	1.659	0.603	0.925	2.17662
169	NCS1_KAN654-2_2.tif:0022-1247	2.448	24.447	0	290	143.456	141.613	0.8	59.838	4645	1.215	0.823	0.874	1.86883
170	NCS1_KAN654-2_3.tif:0001-0014	1.984	28.896	0	213	79.606	1.607	0.932	57.326	4450	1.153	0.867	0.969	1.79038
171	NCS1_KAN654-2_3.tif:0002-0106	2.551	22.904	0	192	96.077	11.987	0.834	58.421	4535	1.446	0.691	0.908	1.82458
172	NCS1_KAN654-2_3.tif:0003-0219	1.881	39.829	0	336	134.049	24.888	0.875	74.91	5815	1.387	0.721	0.933	2.33956
173	NCS1_KAN654-2_3.tif:0004-0336	1.829	30.106	0	193	86.107	38.15	0.966	55.072	4275	1.087	0.92	0.969	1.71997
174	NCS1_KAN654-2_3.tif:0005-0381	2.448	31.942	0	436	7.777	43.303	0.836	78.182	6069	1.426	0.701	0.907	2.44175
175	NCS1_KAN654-2_3.tif:0006-0428	2.409	21.807	0	168	120.781	48.569	0.888	52.534	4078	1.278	0.782	0.917	1.64071
176	NCS1_KAN654-2_3.tif:0007-0503	1.585	18.813	0	161	27.234	57.109	0.921	29.81	2314	1.047	0.955	0.939	0.930997
177	NCS1_KAN654-2_3.tif:0008-0583	1.739	12.037	0	68	143.37	66.159	0.929	20.934	1625	1.118	0.895	0.978	0.65379
178	NCS1_KAN654-2_3.tif:0009-0626	1.868	36.117	0	400	57.827	71.044	0.915	67.464	5237	1.351	0.74	0.932	2.10701
179	NCS1_KAN654-2_3.tif:0010-0642	1.894	35.224	0	276	82.774	72.928	0.963	66.704	5178	1.137	0.88	0.955	2.08328
180	NCS1_KAN654-2_3.tif:0011-0654	2.048	34.044	0	277	124.556	74.277	0.953	69.732	5413	1.075	0.931	0.952	2.17782
181	NCS1_KAN654-2_3.tif:0012-0734	1.52	19.085	0	203	3.125	83.397	0.936	29.011	2252	1.258	0.795	0.937	0.906052
182	NCS1_KAN654-2_3.tif:0013-0759	1.778	14.746	0	137	29.385	86.233	0.914	26.215	2035	1.108	0.903	0.948	0.818746
183	NCS1_KAN654-2_3.tif:0014-0769	2.37	28.799	0	247	66.15	87.312	0.89	68.263	5299	1.318	0.759	0.958	2.13196
184	NCS1_KAN654-2_3.tif:0015-0833	2.151	35.916	0	306	95.035	94.582	0.816	77.268	5998	1.648	0.607	0.949	2.41319
185	NCS1_KAN654-2_3.tif:0016-0867	1.778	25.493	0	184	125.328	98.463	0.965	45.32	3518	1.146	0.872	0.955	1.41541
186	NCS1_KAN654-2_3.tif:0017-0871	2.345	29.659	0	384	7.671	98.827	0.79	69.538	5398	1.333	0.75	0.883	2.17179
187	NCS1_KAN654-2_3.tif:0018-1027	2.177	5.503	0	26	60.482	116.576	0.93	11.98	930	1.2	0.833	0.96	0.374169
188	NCS1_KAN654-2_3.tif:0019-1031	2.847	32.059	0	380	84.364	117.015	0.792	91.271	7085	1.298	0.77	0.898	2.85052
189	NCS1_KAN654-2_3.tif:0020-1104	1.816	32.631	0	284	12.729	125.331	0.924	59.271	4601	1.162	0.86	0.94	1.85113
190	NCS1_KAN654-2_3.tif:0021-1104	2.203	25.813	0	272	103.859	125.336	0.875	56.862	4414	1.351	0.74	0.95	1.77589
191	NCS1_KAN654-2_3.tif:0022-1174	1.932	25.82	0	251	30.385	133.326	0.876	49.893	3873	1.226	0.815	0.923	1.55823
192	NCS1_KAN654-2_3.tif:0023-1175	2.821	21.991	0	299	120.347	133.319	0.785	62.041	4816	1.551	0.645	0.903	1.93763
193	NCS1_KAN654-2_3.tif:0024-1237	1.559	35.983	0	240	1.912	140.495	0.944	56.089	4354	1.119	0.894	0.964	1.75176
194	NCS1_KAN654-2_3.tif:0025-1267	1.945	29.06	0	332	44.473	143.771	0.811	56.527	4388	1.508	0.663	0.904	1.76543
195	NCS1_KAN654-2_4.tif:0001-0047	2.229	33.913	0	280	55.098	5.345	0.898	75.58	5867	1.138	0.879	0.928	2.36048
196	NCS1_KAN654-2_4.tif:0002-0164	2.435	30.344	0	288	85.917	18.682	0.927	73.88	5735	1.129	0.886	0.945	2.30738
197	NCS1_KAN654-2_4.tif:0003-0202	2.061	37.069	0	295	102.041	23.045	0.819	76.405	5931	1.699	0.588	0.938	2.38623
198	NCS1_KAN654-2_4.tif:0004-0259	2.267	41.182	0	530	29.885	29.456	0.771	93.371	7248	1.41	0.709	0.88	2.9161
199	NCS1_KAN654-2_4.tif:0005-0378	2.512	20.277	0	225	85.994	42.89	0.828	50.936	3954	1.244	0.804	0.924	1.59082
200	NCS1_KAN654-2_4.tif:0006-0428	2.048	12.453	0	110	134.474	48.618	0.833	25.507	1980	1.628	0.614	0.941	0.796618
201	NCS1_KAN654-2_4.tif:0007-0474	2.087	18.907	0	103	68.832	53.818	0.936	39.458	3063	1.183	0.845	0.942	1.23234
202	NCS1_KAN654-2_4.tif:0008-0489	2.113	22.11	0	216	54.515	55.555	0.859	46.711	3626	1.369	0.73	0.94	1.45886
203	NCS1_KAN654-2_4.tif:0009-0527	2.589	45.97	0	467	109.157	59.844	0.836	119.032	9240	1.474	0.678	0.935	3.71755
204	NCS1_KAN654-2_4.tif:0010-0529	2.589	40.682	0	434	104.51	60.008	0.884	105.338	8177	1.359	0.736	0.916	3.28987
205	NCS1_KAN654-2_4.tif:0011-0544	1.739	37.904	0	356	26.316	61.823	0.894	65.918	5117	1.24	0.807	0.941	2.05873
206	NCS1_KAN654-2_4.tif:0012-0630	1.533	3.958	0	17	144.517	71.547	0.928	6.068	471	1.296	0.772	0.971	0.189499
207	NCS1_KAN654-2_4.tif:0013-0682	1.726	33.843	0	348	3.442	77.421	0.937	58.421	4535	1.105	0.905	0.95	1.82458
208	NCS1_KAN654-2_4.tif:0014-0756	1.971	13.484	0	103	95.166	85.853	0.917	26.576	2063	1.313	0.761	0.95	0.830012
209	NCS1_KAN654-2_4.tif:0015-0823	2.216	34.198	0	407	68.793	93.51	0.872	75.773	5882	1.16	0.862	0.935	2.36652
210	NCS1_KAN654-2_4.tif:0016-0919	2.383	25.892	0	216	18.8	104.336	0.821	61.706	4790	1.618	0.618	0.925	1.92717
211	NCS1_KAN654-2_4.tif:0017-0936	2.126	6.279	0	31	116.495	106.139	0.695	13.346	1036	1.397	0.716	0.842	0.416816
212	NCS1_KAN654-2_4.tif:0018-1148	1.958	32.421	0	268	66.356	130.353	0.804	63.484	4928	1.57	0.637	0.93	1.98269
213	NCS1_KAN654-2_4.tif:0019-1161	1.984	8.429	0	86	16.516	131.776	0.923	16.721	1298	1.258	0.795	0.96	0.522227
214	NCS1_KAN654-2_5.tif:0001-0055	2.499	31.923	0	336	79.479	6.199	0.77	79.78	6193	1.302	0.768	0.868	2.49164
215	NCS1_KAN654-2_5.tif:0002-0125	2.512	30.995	0	316	121.074	14.222	0.858	77.86	6044	1.17	0.855	0.92	2.4317
216	NCS1_KAN654-2_5.tif:0003-0126	2.01	24.84	0	206	72.554	14.324	0.959	49.919	3875	1.275	0.784	0.954	1.55904
217	NCS1_KAN654-2_5.tif:0004-0170	2.705	36.757	0	410	25.887	19.435	0.686	99.438	7719	1.756	0.57	0.852	3.1056
218	NCS1_KAN654-2_5.tif:0005-0313	1.958	34.428	0	317	84.064	35.602	0.934	67.413	5233	1.225	0.816	0.941	2.10541
219	NCS1_KAN654-2_5.tif:0006-0354	1.919	25.081	0	243	22.221	40.204	0.95	48.141	3737	1.201	0.833	0.961	1.50352
220	NCS1_KAN654-2_5.tif:0007-0519	2.126	41.515	0	450	16.466	58.87	0.954	88.243	6850	1.118	0.895	0.943	2.75598
221	NCS1_KAN654-2_5.tif:0008-0545	2.023	38.529	0	321	143.036	61.933	0.965	77.925	6049	1.123	0.89	0.952	2.43371
222	NCS1_KAN654-2_5.tif:0009-0678	1.958	47.592	0	423	81.58	76.98	0.92	93.19	7234	1.299	0.77	0.971	2.91047
223	NCS1_KAN654-2_5.tif:0010-0717	1.456	10	0	35	60.335	81.429	0.919	14.557	1130	1.006	0.994	0.966	0.454636
224	NCS1_KAN654-2_5.tif:0011-0768	1.894	33.041	0	296	40.097	87.253	0.963	62.569	4857	1.128	0.886	0.955	1.95413
225	NCS1_KAN654-2_5.tif:0012-0847	1.43	7.613	0	33	142.026	96.189	0.891	10.886	845	1.323	0.756	0.937	0.339971
226	NCS1_KAN654-2_5.tif:0013-0853	1.958	45.388	0	501	80.009	96.913	0.911	88.875	6899	1.28	0.781	0.933	2.77569
227	NCS1_KAN654-2_5.tif:0014-1061	1.662	23.147	0	142	58.902	120.42	0.939	38.466	2986	1.084	0.922	0.952	1.20136
228	NCS1_KAN654-2_5.tif:0015-1102	1.649	26.562	0	211	1.387	125.129	0.906	43.8	3400	1.046	0.956	0.959	1.36793
229	NCS1_KAN654-2_5.tif:0016-1123	2.061	34.219	0	299	77.996	127.415	0.934	70.53	5475	1.116	0.896	0.958	2.20277
230	NCS1_KAN654-2_6.tif:0001-0095	1.804	43.736	0	411	114.423	10.861	0.927	78.878	6123	1.132	0.883	0.959	2.46348
231	NCS1_KAN654-2_6.tif:0002-0136	1.919	38.43	0	293	138.799	15.424	0.926	73.764	5726	1.174	0.852	0.955	2.30376
232	NCS1_KAN654-2_6.tif:0003-0175	2.1	27.006	0	187	38.104	19.878	0.942	56.708	4402	1.151	0.869	0.945	1.77107
233	NCS1_KAN654-2_6.tif:0004-0241	2.718	40.749	0	521	93.807	27.335	0.716	110.762	8598	1.726	0.579	0.863	3.45925
234	NCS1_KAN654-2_6.tif:0005-0254	1.662	39.543	0	242	74.259	28.818	0.928	65.712	5101	1.264	0.791	0.942	2.0523
235	NCS1_KAN654-2_6.tif:0006-0271	1.842	37.643	0	239	11.244	30.736	0.912	69.345	5383	1.193	0.838	0.938	2.16576
236	NCS1_KAN654-2_6.tif:0007-0307	1.855	42.514	0	347	115.458	34.833	0.943	78.865	6122	1.155	0.866	0.947	2.46308
237	NCS1_KAN654-2_6.tif:0008-0324	1.894	37.435	0	330	65.617	36.76	0.938	70.891	5503	1.325	0.755	0.961	2.21403
238	NCS1_KAN654-2_6.tif:0009-0420	1.829	44.803	0	398	29.64	47.657	0.882	81.957	6362	1.25	0.8	0.931	2.55964
239	NCS1_KAN654-2_6.tif:0010-0427	1.997	37.942	0	349	60.355	48.51	0.905	75.761	5881	1.277	0.783	0.945	2.36612
240	NCS1_KAN654-2_6.tif:0011-0484	1.919	31.034	0	388	17.705	55.02	0.916	59.568	4624	1.078	0.928	0.94	1.86038
241	NCS1_KAN654-2_6.tif:0012-0517	1.816	43.277	0	251	73.917	58.742	0.975	78.608	6102	1.075	0.93	0.943	2.45503
242	NCS1_KAN654-2_6.tif:0013-0548	2.461	28.209	0	187	116.454	62.069	0.718	69.41	5388	1.719	0.582	0.88	2.16777
243	NCS1_KAN654-2_6.tif:0014-0580	1.636	39.48	0	184	100.998	65.897	0.924	64.592	5014	1.227	0.815	0.958	2.01729
244	NCS1_KAN654-2_6.tif:0015-0622	2.126	36.861	0	240	77.623	70.61	0.886	78.35	6082	1.156	0.865	0.935	2.44699
245	NCS1_KAN654-2_6.tif:0016-0644	2.654	10.485	0	39	81.941	73.138	0.86	27.826	2160	1.268	0.789	0.914	0.869038
246	NCS1_KAN654-2_6.tif:0017-0745	2.976	24.186	0	275	109.285	84.461	0.659	71.973	5587	1.3	0.769	0.825	2.24783
247	NCS1_KAN654-2_6.tif:0018-0751	1.649	23.094	0	153	25.551	85.206	0.931	38.08	2956	1.024	0.977	0.955	1.18929
248	NCS1_KAN654-2_6.tif:0019-0755	2.061	62.337	0	621	62.351	85.738	0.859	128.488	9974	1.312	0.762	0.933	4.01286
249	NCS1_KAN654-2_6.tif:0020-0780	1.829	55.838	0	399	128.914	88.572	0.941	102.143	7929	1.148	0.871	0.966	3.19009
250	NCS1_KAN654-2_6.tif:0021-0843	2.177	55.249	0	518	82.585	95.664	0.907	120.282	9337	1.159	0.863	0.949	3.75658
251	NCS1_KAN654-2_6.tif:0022-0967	1.507	17.214	0	95	21.786	109.781	0.94	25.945	2014	1.121	0.892	0.951	0.810297
252	NCS1_KAN654-2_6.tif:0023-1009	2.177	32.26	0	411	51.167	114.528	0.953	70.234	5452	1.281	0.781	0.963	2.19352
253	NCS1_KAN654-2_6.tif:0024-1076	2.113	39.963	0	367	97.744	122.11	0.948	84.43	6554	1.355	0.738	0.953	2.63689
254	NCS1_KAN654-2_6.tif:0025-1143	2.19	19.271	0	104	83.603	129.68	0.722	42.202	3276	1.591	0.629	0.881	1.31804
										4656.7				1.87354
255	NCS1_KAN654-3_1.tif:0001-0216	2.692	7.024	0	69	49.957	24.469	0.919	18.911	1468	1.328	0.753	0.944	0.653569
256	NCS1_KAN654-3_1.tif:0002-0218	1.919	4.06	0	23	13.108	24.738	0.916	7.794	605	1.277	0.783	0.928	0.269352
257	NCS1_KAN654-3_1.tif:0003-0270	2.28	24.921	0	267	113.166	30.71	0.918	56.824	4411	1.377	0.726	0.949	1.96382
258	NCS1_KAN654-3_1.tif:0004-0350	2.023	8.701	0	37	15.096	39.712	0.931	17.597	1366	1.359	0.736	0.935	0.608158
259	NCS1_KAN654-3_1.tif:0005-0438	1.649	4.391	0	27	24.553	49.851	0.655	7.24	562	2.622	0.381	0.892	0.250208
260	NCS1_KAN654-3_1.tif:0006-0458	2.911	11.783	0	123	118.486	51.773	0.663	34.305	2663	1.508	0.663	0.846	1.1856
261	NCS1_KAN654-3_1.tif:0007-0457	2.138	8.018	0	41	52.951	51.915	0.913	17.146	1331	1.386	0.721	0.946	0.592575
262	NCS1_KAN654-3_1.tif:0008-0518	2.654	29.214	0	378	70.401	58.764	0.867	77.525	6018	1.046	0.956	0.93	2.67928
263	NCS1_KAN654-3_1.tif:0009-0523	2.074	23.248	0	248	27.319	59.417	0.931	48.218	3743	1.141	0.876	0.942	1.66642
264	NCS1_KAN654-3_1.tif:0010-0650	1.713	9.06	0	42	21.575	73.788	0.905	15.523	1205	1.486	0.673	0.953	0.536479
265	NCS1_KAN654-3_1.tif:0011-0697	2.345	13.11	0	97	80.072	79.168	0.944	30.737	2386	1.101	0.908	0.958	1.06227
266	NCS1_KAN654-3_1.tif:0012-0730	1.997	12.394	0	72	46.308	82.875	0.943	24.747	1921	1.012	0.988	0.928	0.855249
267	NCS1_KAN654-3_1.tif:0013-0789	2.203	15.111	0	124	22.064	89.518	0.918	33.288	2584	1.066	0.938	0.955	1.15042
268	NCS1_KAN654-3_1.tif:0014-0851	1.636	4.008	0	16	126.859	96.619	0.75	6.557	509	2.032	0.492	0.917	0.226612
269	NCS1_KAN654-3_1.tif:0015-0934	2.357	11.158	0	121	54.375	105.978	0.963	26.306	2042	1.156	0.865	0.943	0.90912
270	NCS1_KAN654-3_1.tif:0016-1213	1.726	7.627	0	28	28.38	137.753	0.937	13.166	1022	1.109	0.902	0.947	0.455005
271	NCS1_KAN654-3_1.tif:0017-1257	2.19	12.524	0	125	100.277	142.709	0.807	27.426	2129	1.51	0.662	0.885	0.947853
272	NCS1_KAN654-3_2.tif:0001-0007	1.688	7.641	0	31	105.849	0.817	0.902	12.895	1001	1.175	0.851	0.963	0.445656
273	NCS1_KAN654-3_2.tif:0002-0087	2.177	5.314	0	46	19.581	9.884	0.907	11.568	898	1.034	0.967	0.947	0.399799
274	NCS1_KAN654-3_2.tif:0003-0098	2.254	9.989	0	52	77.312	11.184	0.953	22.518	1748	1.274	0.785	0.951	0.778228
275	NCS1_KAN654-3_2.tif:0004-0156	2.976	12.312	0	107	66.598	17.709	0.678	36.637	2844	1.142	0.876	0.819	1.26618
276	NCS1_KAN654-3_2.tif:0005-0156	1.945	4.06	0	20	63.883	17.762	0.765	7.897	613	1.844	0.542	0.888	0.272914
277	NCS1_KAN654-3_2.tif:0006-0159	2.499	9.088	0	61	138.39	18.077	0.921	22.711	1763	1.127	0.887	0.933	0.784906
278	NCS1_KAN654-3_2.tif:0007-0169	2.332	24.133	0	186	117.699	19.26	0.917	56.27	4368	1.319	0.758	0.953	1.94468
279	NCS1_KAN654-3_2.tif:0008-0265	2.023	8.662	0	53	101.414	30.117	0.917	17.52	1360	1.237	0.808	0.952	0.605486
280	NCS1_KAN654-3_2.tif:0009-0275	2.667	6.594	0	54	48.498	31.241	0.931	17.584	1365	1.191	0.84	0.935	0.607712
281	NCS1_KAN654-3_2.tif:0010-0324	2.28	6.91	0	36	90.916	36.76	0.954	15.755	1223	1.21	0.826	0.934	0.544493
282	NCS1_KAN654-3_2.tif:0011-0384	1.984	23.896	0	190	143.338	43.599	0.932	47.407	3680	1.175	0.851	0.969	1.63837
283	NCS1_KAN654-3_2.tif:0012-0476	2.151	17.695	0	98	51.461	54.011	0.919	38.067	2955	1.171	0.854	0.949	1.3156
284	NCS1_KAN654-3_2.tif:0013-0485	2.615	10.192	0	101	104.103	55.016	0.893	26.653	2069	1.121	0.892	0.921	0.921141
285	NCS1_KAN654-3_2.tif:0014-0521	2.061	28.781	0	254	126.418	59.232	0.934	59.323	4605	1.115	0.897	0.955	2.05019
286	NCS1_KAN654-3_2.tif:0015-0534	1.971	20.065	0	175	29.55	60.617	0.965	39.549	3070	1.207	0.829	0.942	1.3668
287	NCS1_KAN654-3_2.tif:0016-0659	2.048	10.333	0	120	47.575	74.823	0.919	21.166	1643	1.373	0.728	0.944	0.731481
288	NCS1_KAN654-3_2.tif:0017-0683	2.448	6.032	0	44	109.719	77.529	0.902	14.763	1146	1.429	0.7	0.936	0.510211
289	NCS1_KAN654-3_2.tif:0018-0736	2.989	11.052	0	148	28.964	83.426	0.719	33.03	2564	1.823	0.549	0.858	1.14152
290	NCS1_KAN654-3_2.tif:0019-0746	3.8	5.671	0	32	130.039	84.677	0.832	21.552	1673	1.33	0.752	0.898	0.744837
291	NCS1_KAN654-3_2.tif:0020-0749	2.357	5.984	0	30	8.92	85.079	0.778	14.106	1095	1.415	0.707	0.901	0.487506
292	NCS1_KAN654-3_2.tif:0021-0753	2.1	24.123	0	137	121.206	85.497	0.942	50.653	3932	1.366	0.732	0.948	1.75057
293	NCS1_KAN654-3_2.tif:0022-0850	2.01	13.237	0	78	74.964	96.471	0.911	26.602	2065	1.453	0.688	0.954	0.91936
294	NCS1_KAN654-3_2.tif:0023-0905	2.37	22.647	0	226	129.272	102.692	0.945	53.68	4167	1.241	0.806	0.941	1.85519
295	NCS1_KAN654-3_2.tif:0024-1065	2.229	29.254	0	292	90.949	120.996	0.929	65.197	5061	1.164	0.859	0.958	2.25321
296	NCS1_KAN654-3_2.tif:0025-1072	2.126	8.467	0	43	69.015	121.688	0.954	17.997	1397	1.074	0.931	0.946	0.621959
297	NCS1_KAN654-3_2.tif:0026-1074	2.229	14.017	0	148	134.668	121.899	0.919	31.239	2425	1.185	0.844	0.938	1.07964
298	NCS1_KAN654-3_2.tif:0027-1123	2.229	5.283	0	25	102.343	127.484	0.889	11.774	914	1.438	0.695	0.923	0.406922
299	NCS1_KAN654-3_3.tif:0001-0071	1.778	4.536	0	21	142.037	8	0.904	8.064	626	1.236	0.809	0.936	0.278702
300	NCS1_KAN654-3_3.tif:0002-0223	2.357	19.486	0	189	74.941	25.349	0.927	45.938	3566	1.473	0.679	0.966	1.58762
301	NCS1_KAN654-3_3.tif:0003-0331	2.667	8.841	0	43	99.635	37.625	0.902	23.575	1830	1.411	0.709	0.928	0.814735
302	NCS1_KAN654-3_3.tif:0004-0393	2.602	10.025	0	61	55.877	44.638	0.861	26.087	2025	1.278	0.783	0.914	0.901551
303	NCS1_KAN654-3_3.tif:0005-0393	1.945	23.94	0	180	122.98	44.616	0.882	46.569	3615	1.475	0.678	0.956	1.60944
304	NCS1_KAN654-3_3.tif:0006-0443	2.357	5.098	0	26	25.563	50.343	0.865	12.019	933	1.452	0.689	0.958	0.415381
305	NCS1_KAN654-3_3.tif:0007-0634	2.564	5.673	0	29	15.023	71.94	0.702	14.544	1129	1.832	0.546	0.882	0.502643
306	NCS1_KAN654-3_3.tif:0008-0671	1.353	4.59	0	23	126.705	76.247	0.764	6.209	482	1.819	0.55	0.913	0.214591
307	NCS1_KAN654-3_3.tif:0009-0783	2.1	20.558	0	211	119.957	88.899	0.897	43.168	3351	1.312	0.762	0.948	1.4919
308	NCS1_KAN654-3_3.tif:0010-0833	2.113	6.421	0	37	12.992	94.637	0.88	13.565	1053	1.529	0.654	0.953	0.468807
309	NCS1_KAN654-3_3.tif:0011-0844	1.7	4.462	0	20	98.398	95.884	0.977	7.588	589	1.085	0.921	0.936	0.262229
310	NCS1_KAN654-3_3.tif:0012-0906	1.481	3.426	0	21	140.913	102.871	0.912	5.076	394	1.508	0.663	0.95	0.175413
311	NCS1_KAN654-3_3.tif:0013-0933	1.378	4.14	0	19	137.674	105.906	0.717	5.707	443	2.379	0.42	0.915	0.197228
312	NCS1_KAN654-3_3.tif:0014-1115	1.314	4.922	0	22	38.731	126.575	0.909	6.467	502	1.504	0.665	0.944	0.223496
313	NCS1_KAN654-3_3.tif:0015-1154	2.473	21.026	0	207	91.455	131.052	0.911	52.006	4037	1.369	0.73	0.939	1.79732
314	NCS1_KAN654-3_3.tif:0016-1161	1.907	5.899	0	25	110.709	131.792	0.91	11.246	873	1.397	0.716	0.934	0.388669
315	NCS1_KAN654-3_3.tif:0017-1193	1.984	4.429	0	23	111.489	135.45	0.923	8.786	682	1.096	0.912	0.942	0.303634
316	NCS1_KAN654-3_4.tif:0001-0018	2.486	13.699	0	109	135.969	2.066	0.895	34.061	2644	1.333	0.75	0.937	1.17714
317	NCS1_KAN654-3_4.tif:0002-0082	2.486	14.326	0	124	23.895	9.323	0.876	35.619	2765	1.409	0.709	0.932	1.23101
318	NCS1_KAN654-3_4.tif:0003-0084	2.267	6.812	0	41	74.935	9.62	0.824	15.446	1199	1.621	0.617	0.931	0.533807
319	NCS1_KAN654-3_4.tif:0004-0105	1.907	4.338	0	18	72.765	11.953	0.985	8.27	642	1.157	0.864	0.94	0.285825
320	NCS1_KAN654-3_4.tif:0005-0288	2.01	5.071	0	23	30.445	32.677	0.911	10.19	791	1.139	0.878	0.943	0.352162
321	NCS1_KAN654-3_4.tif:0006-0288	2.1	8.288	0	41	115.928	32.671	0.942	17.404	1351	1.053	0.95	0.939	0.601479
322	NCS1_KAN654-3_4.tif:0007-0366	2.95	5.59	0	33	89.091	41.461	0.742	16.489	1280	1.718	0.582	0.886	0.56987
323	NCS1_KAN654-3_4.tif:0008-0437	2.332	21.707	0	171	62.66	49.597	0.93	50.614	3929	1.223	0.818	0.94	1.74923
324	NCS1_KAN654-3_4.tif:0009-0519	2.293	25.5	0	239	118.945	58.968	0.902	58.473	4539	1.103	0.907	0.942	2.02081
325	NCS1_KAN654-3_4.tif:0010-0601	3.027	24.949	0	355	20.994	68.325	0.66	75.529	5863	1.298	0.77	0.809	2.61027
326	NCS1_KAN654-3_4.tif:0011-0633	1.945	4.921	0	33	107.074	71.933	0.989	9.572	743	1.037	0.964	0.965	0.330791
327	NCS1_KAN654-3_4.tif:0012-0678	2.087	13.08	0	76	117.57	76.98	0.927	27.297	2119	1.095	0.914	0.928	0.943401
328	NCS1_KAN654-3_4.tif:0013-0713	2.087	36.191	0	329	132.421	80.951	0.946	75.529	5863	1.091	0.917	0.956	2.61027
329	NCS1_KAN654-3_4.tif:0014-0781	2.538	22.533	0	255	71.507	88.705	0.935	57.184	4439	1.153	0.868	0.94	1.97629
330	NCS1_KAN654-3_4.tif:0015-0812	2.074	20.342	0	124	46.487	92.175	0.965	42.189	3275	1.071	0.934	0.955	1.45806
331	NCS1_KAN654-3_4.tif:0016-0833	1.7	4.22	0	24	142.89	94.562	0.988	7.175	557	1.035	0.966	0.967	0.247982
332	NCS1_KAN654-3_4.tif:0017-0854	2.229	16.688	0	240	8.319	96.881	0.965	37.191	2887	1.12	0.893	0.943	1.28532
333	NCS1_KAN654-3_4.tif:0018-1006	2.564	19.945	0	166	97.508	114.188	0.849	51.13	3969	1.165	0.859	0.884	1.76704
334	NCS1_KAN654-3_4.tif:0019-1007	2.113	5.866	0	29	28.56	114.351	0.948	12.393	962	1.165	0.858	0.943	0.428293
335	NCS1_KAN654-3_4.tif:0020-1128	2.448	12.684	0	84	122.989	128.039	0.843	31.046	2410	1.651	0.606	0.941	1.07296
336	NCS1_KAN654-3_5.tif:0001-0034	2.177	16.627	0	186	108.4	3.863	0.953	36.199	2810	1.056	0.947	0.947	1.25104
337	NCS1_KAN654-3_5.tif:0002-0085	2.873	18.022	0	172	57.314	9.631	0.799	51.774	4019	1.848	0.541	0.943	1.7893
338	NCS1_KAN654-3_5.tif:0003-0148	2.267	16.364	0	113	33.434	16.879	0.904	37.101	2880	1.338	0.747	0.936	1.28221
339	NCS1_KAN654-3_5.tif:0004-0214	2.512	29.144	0	356	86.851	24.312	0.947	73.21	5683	1.055	0.948	0.933	2.53013
340	NCS1_KAN654-3_5.tif:0005-0217	2.023	14.414	0	158	123.989	24.677	0.941	29.153	2263	1.066	0.938	0.954	1.00751
341	NCS1_KAN654-3_5.tif:0006-0274	2.087	9.377	0	40	9.982	31.135	0.971	19.568	1519	1.178	0.849	0.97	0.676275
342	NCS1_KAN654-3_5.tif:0007-0456	1.34	3.548	0	20	39.233	51.733	0.711	4.754	369	2.451	0.408	0.839	0.164283
343	NCS1_KAN654-3_5.tif:0008-0487	2.924	21.053	0	92	139.941	55.276	0.89	61.564	4779	1.373	0.728	0.956	2.12766
344	NCS1_KAN654-3_5.tif:0009-0498	2.267	7.477	0	48	70.279	56.569	0.913	16.953	1316	1.116	0.896	0.944	0.585897
345	NCS1_KAN654-3_5.tif:0010-0508	2.422	3.601	0	16	43.486	57.653	0.707	8.721	677	1.32	0.758	0.862	0.301408
346	NCS1_KAN654-3_5.tif:0011-0531	1.868	10.386	0	45	26.318	60.284	0.95	19.401	1506	1.22	0.82	0.957	0.670487
347	NCS1_KAN654-3_5.tif:0012-0532	1.43	3.649	0	19	113.92	60.377	0.724	5.217	405	1.942	0.515	0.902	0.18031
348	NCS1_KAN654-3_5.tif:0013-0555	1.404	4.826	0	31	69.33	63.021	0.913	6.776	526	1.191	0.84	0.96	0.234181
349	NCS1_KAN654-3_5.tif:0014-0836	2.151	3.886	0	18	55.462	94.897	0.941	8.361	649	1.312	0.762	0.952	0.288942
350	NCS1_KAN654-3_5.tif:0015-1115	2.229	5.208	0	32	45.701	126.625	0.942	11.607	901	1.101	0.908	0.945	0.401135
351	NCS1_KAN654-3_5.tif:0016-1120	2.048	35.931	0	343	74.234	127.225	0.896	73.596	5713	1.198	0.835	0.93	2.54349
352	NCS1_KAN654-3_5.tif:0017-1183	1.778	23.486	0	147	13.187	134.332	0.939	41.751	3241	1.064	0.94	0.952	1.44293
353	NCS1_KAN654-3_5.tif:0018-1183	2.113	11.244	0	119	111.077	134.333	0.948	23.755	1844	1.169	0.855	0.94	0.820968
354	NCS1_KAN654-3_6.tif:0001-0108	2.899	8.289	0	53	73.602	12.215	0.784	24.025	1865	1.046	0.956	0.895	0.830318
355	NCS1_KAN654-3_6.tif:0002-0125	3.208	19.028	0	87	88.766	14.229	0.903	61.036	4738	1.282	0.78	0.943	2.10941
356	NCS1_KAN654-3_6.tif:0003-0145	2.164	5.256	0	23	48.171	16.416	0.947	11.375	883	1.176	0.85	0.957	0.393121
357	NCS1_KAN654-3_6.tif:0004-0179	2.061	8.306	0	73	99.236	20.328	0.934	17.121	1329	1.195	0.837	0.955	0.591685
358	NCS1_KAN654-3_6.tif:0005-0238	2.551	28.667	0	385	140.409	26.889	0.664	73.12	5676	1.756	0.57	0.867	2.52702
359	NCS1_KAN654-3_6.tif:0006-0280	2.396	34.849	0	363	16.958	31.822	0.933	83.503	6482	1.341	0.746	0.949	2.88585
360	NCS1_KAN654-3_6.tif:0007-0305	2.757	5.15	0	28	77.434	34.503	0.656	14.196	1102	1.752	0.571	0.817	0.490622
361	NCS1_KAN654-3_6.tif:0008-0499	1.894	21.143	0	137	127.534	56.634	0.938	40.038	3108	1.018	0.982	0.955	1.38371
362	NCS1_KAN654-3_6.tif:0009-0558	1.945	26.046	0	256	33.486	63.329	0.938	50.666	3933	1.216	0.822	0.959	1.75101
363	NCS1_KAN654-3_6.tif:0010-0571	2.628	10.755	0	51	100.162	64.881	0.87	28.264	2194	1.241	0.806	0.919	0.976792
364	NCS1_KAN654-3_6.tif:0011-0656	1.765	4.927	0	33	95.221	74.413	0.761	8.696	675	1.348	0.742	0.864	0.300517
365	NCS1_KAN654-3_6.tif:0012-0739	1.945	17.166	0	125	11.556	83.872	0.953	33.391	2592	1.089	0.918	0.944	1.15399
366	NCS1_KAN654-3_6.tif:0013-0823	1.752	19.897	0	96	49.352	93.472	0.926	34.859	2706	1.186	0.843	0.948	1.20474
367	NCS1_KAN654-3_6.tif:0014-0879	2.357	19.219	0	223	132.147	99.81	0.897	45.307	3517	1.455	0.687	0.941	1.56581
368	NCS1_KAN654-3_6.tif:0015-0971	2.396	12.333	0	149	46.515	110.205	0.924	29.552	2294	1.315	0.761	0.93	1.02131
369	NCS1_KAN654-3_6.tif:0016-1021	1.649	4.82	0	29	11.537	115.964	0.895	7.948	617	1.291	0.775	0.924	0.274695
370	NCS1_KAN654-3_6.tif:0017-1243	1.868	4.29	0	20	26.698	141.055	0.925	8.013	622	1.24	0.806	0.951	0.276921
371	NCS1_KAN654-3_6.tif:0018-1244	3.014	5.974	0	34	109.645	141.172	0.866	18.009	1398	1.106	0.904	0.902	0.622404
										2246.13				1
372	NCS1_KAN654-4_1.tif:0001-0203	2.422	28.106	0	231	59.52	23.057	0.922	68.07	5284	1.111	0.9	0.945	2.35249
373	NCS1_KAN654-4_1.tif:0002-0351	1.52	4.814	0	27	121.426	39.844	0.696	7.317	568	2.56	0.391	0.904	0.25288
374	NCS1_KAN654-4_1.tif:0003-0417	1.533	4.37	0	21	118.713	47.377	0.751	6.699	520	2.021	0.495	0.859	0.231509
375	NCS1_KAN654-4_1.tif:0004-0441	1.327	5.019	0	30	115.236	50.218	0.701	6.66	517	1.853	0.54	0.851	0.230174
376	NCS1_KAN654-4_1.tif:0005-0454	2.461	10.55	0	53	119.645	51.407	0.755	25.958	2015	1.313	0.762	0.89	0.897099
377	NCS1_KAN654-4_1.tif:0006-0567	2.319	17.2	0	256	38.287	64.414	0.925	39.883	3096	1.345	0.743	0.938	1.37837
378	NCS1_KAN654-4_1.tif:0007-0593	2.332	37.928	0	406	80.081	67.297	0.896	88.437	6865	1.194	0.837	0.945	3.05637
379	NCS1_KAN654-4_1.tif:0008-0839	1.456	5.451	0	28	103.369	95.227	0.667	7.935	616	2.318	0.431	0.85	0.27425
380	NCS1_KAN654-4_1.tif:0009-0883	2.345	33.159	0	344	61.649	100.28	0.852	77.744	6035	1.284	0.779	0.917	2.68685
381	NCS1_KAN654-4_1.tif:0010-0905	2.499	36.072	0	476	106.269	102.806	0.872	90.15	6998	1.224	0.817	0.904	3.11558
382	NCS1_KAN654-4_1.tif:0011-0937	2.216	13.93	0	107	33.164	106.495	0.747	30.866	2396	1.457	0.686	0.875	1.06672
383	NCS1_KAN654-4_1.tif:0012-0940	1.404	3.376	0	18	108.605	106.72	0.902	4.741	368	1.432	0.699	0.94	0.163837
384	NCS1_KAN654-4_1.tif:0013-1135	2.422	30.894	0	383	73.468	128.853	0.892	74.82	5808	1.262	0.792	0.931	2.58578
385	NCS1_KAN654-4_1.tif:0014-1148	1.636	11.181	0	60	3.818	130.285	0.913	18.293	1420	1.383	0.723	0.924	0.632199
386	NCS1_KAN654-4_1.tif:0015-1247	1.353	7.01	0	39	133.131	141.604	0.919	9.481	736	1.13	0.885	0.977	0.327675
387	NCS1_KAN654-4_2.tif:0001-0075	2.86	25.32	0	404	41.081	8.403	0.711	72.411	5621	1.163	0.86	0.846	2.50253
388	NCS1_KAN654-4_2.tif:0002-0499	1.623	3.881	0	18	134.103	56.691	0.725	6.299	489	2.257	0.443	0.913	0.217708
389	NCS1_KAN654-4_2.tif:0003-0505	2.615	9.842	0	66	41.247	57.195	0.668	25.739	1998	2.134	0.469	0.864	0.889531
390	NCS1_KAN654-4_2.tif:0004-0523	3.182	17.538	0	238	134.914	59.357	0.696	55.806	4332	1.487	0.673	0.864	1.92865
391	NCS1_KAN654-4_2.tif:0005-0542	2.164	4.476	0	29	137.228	61.527	0.664	9.687	752	2.597	0.385	0.887	0.334798
392	NCS1_KAN654-4_2.tif:0006-0599	2.074	37.224	0	244	92.023	67.986	0.944	77.203	5993	1.111	0.9	0.923	2.66815
393	NCS1_KAN654-4_2.tif:0007-0608	2.203	31.105	0	323	13.498	69.056	0.887	68.521	5319	1.384	0.723	0.937	2.36807
394	NCS1_KAN654-4_2.tif:0008-0743	2.164	36.375	0	330	44.993	84.358	0.902	78.723	6111	1.297	0.771	0.957	2.72068
395	NCS1_KAN654-4_2.tif:0009-0851	2.473	28.38	0	374	19.524	96.594	0.86	70.195	5449	1.178	0.849	0.937	2.42595
396	NCS1_KAN654-4_2.tif:0010-0862	1.881	44.87	0	420	59.141	97.91	0.942	84.392	6551	1.109	0.901	0.977	2.91657
397	NCS1_KAN654-4_2.tif:0011-0903	1.366	3.972	0	14	20.87	102.502	0.827	5.423	421	1.395	0.717	0.91	0.187434
398	NCS1_KAN654-4_2.tif:0012-0922	2.37	41.62	0	533	77.35	104.746	0.902	98.652	7658	1.072	0.933	0.934	3.40942
399	NCS1_KAN654-4_2.tif:0013-1012	1.997	21.594	0	142	22.156	114.942	0.929	43.117	3347	1.267	0.789	0.951	1.49012
400	NCS1_KAN654-4_2.tif:0014-1189	1.945	16.252	0	223	93.284	135.058	0.953	31.613	2454	1.069	0.935	0.941	1.09255
401	NCS1_KAN654-4_2.tif:0015-1255	1.958	31.638	0	306	53.386	142.519	0.944	61.951	4809	1.122	0.891	0.962	2.14102
402	NCS1_KAN654-4_3.tif:0001-0033	2.267	43.705	0	380	38.54	3.697	0.913	99.09	7692	1.449	0.69	0.962	3.42456
403	NCS1_KAN654-4_3.tif:0002-0059	1.868	39.476	0	372	19.111	6.686	0.96	73.738	5724	1.077	0.928	0.973	2.54839
404	NCS1_KAN654-4_3.tif:0003-0115	2.242	46.402	0	453	85.007	13.063	0.912	104.011	8074	1.219	0.82	0.964	3.59463
405	NCS1_KAN654-4_3.tif:0004-0287	1.713	3.789	0	21	95.598	32.637	0.704	6.493	504	2.385	0.419	0.917	0.224386
406	NCS1_KAN654-4_3.tif:0005-0364	1.327	3.621	0	18	140.588	41.351	0.762	4.805	373	2.047	0.489	0.88	0.166064
407	NCS1_KAN654-4_3.tif:0006-0383	1.366	3.547	0	19	132.609	43.444	0.784	4.844	376	1.825	0.548	0.855	0.167399
408	NCS1_KAN654-4_3.tif:0007-0403	2.151	16.581	0	100	29.7	45.74	0.909	35.671	2769	1.476	0.678	0.933	1.23279
409	NCS1_KAN654-4_3.tif:0008-0407	1.469	5	0	27	127.834	46.211	0.943	7.343	570	1.305	0.767	0.95	0.25377
410	NCS1_KAN654-4_3.tif:0009-0425	1.585	4.382	0	18	134.436	48.198	0.734	6.944	539	2.237	0.447	0.953	0.239968
411	NCS1_KAN654-4_3.tif:0010-0458	3.942	19.706	0	178	76.638	52.125	0.682	77.68	6030	1.478	0.677	0.821	2.68462
412	NCS1_KAN654-4_3.tif:0011-0460	1.288	3.8	0	15	79.148	52.173	0.728	4.895	380	2.28	0.439	0.885	0.16918
413	NCS1_KAN654-4_3.tif:0012-0467	1.301	4.198	0	19	92.409	53.135	0.651	5.462	424	2.604	0.384	0.86	0.188769
414	NCS1_KAN654-4_3.tif:0013-0466	2.473	29.344	0	312	125.791	52.882	0.911	72.579	5634	1.393	0.718	0.932	2.50832
415	NCS1_KAN654-4_3.tif:0014-0508	2.074	43.168	0	528	123.648	57.673	0.908	89.532	6950	1.366	0.732	0.944	3.09421
416	NCS1_KAN654-4_3.tif:0015-0600	2.01	37.397	0	368	24.411	68.144	0.935	75.155	5834	1.235	0.81	0.948	2.59736
417	NCS1_KAN654-4_3.tif:0016-0636	1.378	3.411	0	18	3.398	72.183	0.757	4.702	365	2.04	0.49	0.903	0.162502
418	NCS1_KAN654-4_3.tif:0017-0668	1.636	4.079	0	18	43.661	75.947	0.75	6.673	518	1.764	0.567	0.879	0.230619
419	NCS1_KAN654-4_3.tif:0018-0728	1.327	3.369	0	15	58.67	82.63	0.794	4.47	347	1.717	0.582	0.855	0.154488
420	NCS1_KAN654-4_3.tif:0019-0731	1.327	4.379	0	18	7.592	83.009	0.803	5.81	451	1.934	0.517	0.932	0.20079
421	NCS1_KAN654-4_3.tif:0020-0788	1.34	5.356	0	19	68.451	89.453	0.66	7.175	557	2.998	0.334	0.981	0.247982
422	NCS1_KAN654-4_3.tif:0021-0793	2.216	38.785	0	330	123.423	90.075	0.914	85.938	6671	1.241	0.806	0.932	2.97
423	NCS1_KAN654-4_3.tif:0022-0819	1.288	4.49	0	17	77.754	92.829	0.688	5.784	449	1.638	0.611	0.833	0.1999
424	NCS1_KAN654-4_3.tif:0023-0881	1.572	7.967	0	45	144.299	100.07	0.968	12.522	972	1.171	0.854	0.942	0.432745
425	NCS1_KAN654-4_3.tif:0024-0954	2.035	17.228	0	89	32.05	108.29	0.913	35.065	2722	1.036	0.966	0.932	1.21186
426	NCS1_KAN654-4_3.tif:0025-1023	1.958	30.526	0	342	48.276	116.122	0.901	59.774	4640	1.348	0.742	0.93	2.06578
427	NCS1_KAN654-4_3.tif:0026-1053	1.932	4.74	0	19	103.626	119.52	0.703	9.159	711	2.275	0.44	0.875	0.316545
428	NCS1_KAN654-4_3.tif:0027-1107	2.319	35.15	0	376	83.972	125.616	0.903	81.506	6327	1.228	0.814	0.921	2.81685
429	NCS1_KAN654-4_3.tif:0028-1122	2.164	14.482	0	84	111.339	127.337	0.924	31.343	2433	1.344	0.744	0.955	1.0832
430	NCS1_KAN654-4_3.tif:0029-1173	2.293	28.775	0	175	142.39	133.211	0.902	65.983	5122	1.381	0.724	0.957	2.28037
431	NCS1_KAN654-4_4.tif:0001-0096	2.267	35.165	0	484	105.952	10.922	0.913	79.728	6189	1.092	0.916	0.934	2.75541
432	NCS1_KAN654-4_4.tif:0002-0209	2.048	20.145	0	74	125.681	23.747	0.762	41.262	3203	1.854	0.539	0.886	1.42601
433	NCS1_KAN654-4_4.tif:0003-0282	1.572	4.631	0	17	21.128	31.958	0.787	7.278	565	1.368	0.731	0.887	0.251544
434	NCS1_KAN654-4_4.tif:0004-0336	2.293	38.888	0	335	12.823	38.228	0.902	89.171	6922	1.33	0.752	0.954	3.08175
435	NCS1_KAN654-4_4.tif:0005-0347	2.383	26.314	0	334	78.021	39.33	0.858	62.711	4868	1.369	0.731	0.927	2.16729
436	NCS1_KAN654-4_4.tif:0006-0442	1.417	3.755	0	24	48.961	50.236	0.729	5.32	413	2.117	0.472	0.873	0.183872
437	NCS1_KAN654-4_4.tif:0007-0543	2.551	28.667	0	436	22.591	61.581	0.86	73.12	5676	1.407	0.71	0.938	2.52702
438	NCS1_KAN654-4_4.tif:0008-0684	2.383	18.751	0	93	89.946	77.662	0.858	44.689	3469	1.478	0.677	0.927	1.54444
439	NCS1_KAN654-4_4.tif:0009-0785	1.881	14.808	0	193	41.899	89.173	0.956	27.851	2162	1.368	0.731	0.961	0.962545
440	NCS1_KAN654-4_4.tif:0010-0792	1.378	3.29	0	15	58.2	89.978	0.698	4.535	352	2.57	0.389	0.947	0.156714
441	NCS1_KAN654-4_4.tif:0011-0865	2.087	28.778	0	307	105.167	98.279	0.9	60.057	4662	1.159	0.863	0.956	2.07557
442	NCS1_KAN654-4_4.tif:0012-0931	2.396	24.925	0	228	33.716	105.773	0.863	59.722	4636	1.295	0.772	0.916	2.064
443	NCS1_KAN654-4_4.tif:0013-0929	1.327	3.447	0	15	135.472	105.535	0.682	4.573	355	2.282	0.438	0.858	0.15805
444	NCS1_KAN654-4_4.tif:0014-0949	2.589	31.856	0	316	140.153	107.789	0.846	82.485	6403	1.207	0.828	0.905	2.85068
445	NCS1_KAN654-4_4.tif:0015-1048	2.164	29.607	0	204	89.234	119.072	0.937	64.076	4974	1.066	0.938	0.931	2.21448
446	NCS1_KAN654-4_4.tif:0016-1110	2.254	27.417	0	275	49.741	125.959	0.858	61.809	4798	1.278	0.783	0.916	2.13612
447	NCS1_KAN654-4_5.tif:0001-0265	1.997	36.052	0	335	124.143	30.141	0.929	71.986	5588	1.103	0.907	0.942	2.48784
448	NCS1_KAN654-4_5.tif:0002-0278	2.564	31.688	0	392	3.088	31.534	0.728	81.235	6306	1.456	0.687	0.86	2.8075
449	NCS1_KAN654-4_5.tif:0003-0332	2.19	42.871	0	501	45.583	37.725	0.913	93.886	7288	1.199	0.834	0.95	3.24469
450	NCS1_KAN654-4_5.tif:0004-0505	2.37	29.837	0	321	59.299	57.326	0.914	70.724	5490	1.255	0.797	0.927	2.44421
451	NCS1_KAN654-4_5.tif:0005-0568	2.28	62.893	0	705	110.747	64.504	0.941	143.405	11132	1.294	0.773	0.949	4.95608
452	NCS1_KAN654-4_5.tif:0006-0725	2.744	22.221	0	159	104.065	82.126	0.788	60.972	4733	1.185	0.844	0.875	2.10718
453	NCS1_KAN654-4_5.tif:0007-0734	1.533	3.697	0	19	105.976	83.244	0.671	5.668	440	2.24	0.447	0.81	0.195893
454	NCS1_KAN654-4_5.tif:0008-0736	1.726	3.94	0	22	133.434	83.544	0.686	6.802	528	2.412	0.415	0.896	0.235071
455	NCS1_KAN654-4_5.tif:0009-0785	2.551	30.525	0	359	63.631	89.06	0.86	77.86	6044	1.34	0.746	0.936	2.69085
456	NCS1_KAN654-4_5.tif:0010-0815	2.164	30.571	0	270	24.044	92.5	0.924	66.163	5136	1.04	0.962	0.939	2.2866
457	NCS1_KAN654-4_5.tif:0011-1066	2.087	28.216	0	281	60.881	121.075	0.9	58.885	4571	1.17	0.854	0.961	2.03506
458	NCS1_KAN654-4_5.tif:0012-1117	2.061	23.275	0	196	28.962	126.775	0.973	47.974	3724	1.283	0.779	0.95	1.65796
459	NCS1_KAN654-4_5.tif:0013-1139	1.726	20.045	0	114	123.895	129.306	0.888	34.602	2686	1.22	0.82	0.937	1.19584
460	NCS1_KAN654-4_6.tif:0001-0191	1.804	3.721	0	19	81.666	21.595	0.662	6.712	521	1.655	0.604	0.812	0.231955
461	NCS1_KAN654-4_6.tif:0002-0222	2.808	34.771	0	446	52.388	25.081	0.797	97.647	7580	1.478	0.677	0.912	3.3747
462	NCS1_KAN654-4_6.tif:0003-0239	1.43	4.775	0	25	78.223	27.186	0.808	6.828	530	1.728	0.579	0.929	0.235962
463	NCS1_KAN654-4_6.tif:0004-0342	2.461	33.194	0	354	125.052	38.745	0.771	81.673	6340	1.525	0.656	0.907	2.82263
464	NCS1_KAN654-4_6.tif:0005-0393	1.559	6.653	0	37	124.592	44.671	0.656	10.37	805	2.634	0.38	0.9	0.358395
465	NCS1_KAN654-4_6.tif:0006-0445	1.404	4.587	0	20	63.494	50.544	0.688	6.441	500	2.307	0.433	0.826	0.222605
466	NCS1_KAN654-4_6.tif:0007-0668	1.443	4.259	0	25	65.934	75.833	0.838	6.145	477	1.731	0.578	0.926	0.212365
467	NCS1_KAN654-4_6.tif:0008-0696	1.623	46.563	0	305	49.273	78.995	0.943	75.58	5867	1.16	0.862	0.955	2.61205
468	NCS1_KAN654-4_6.tif:0009-0722	2.345	4.736	0	34	35.316	81.925	0.658	11.105	862	2.28	0.439	0.873	0.383772
469	NCS1_KAN654-4_6.tif:0010-0854	2.409	31.187	0	452	31.202	96.896	0.856	75.129	5832	1.539	0.65	0.942	2.59647
470	NCS1_KAN654-4_6.tif:0011-1019	1.997	22.813	0	196	86.229	115.737	1	45.552	3536	1.087	0.92	0.957	1.57426
471	NCS1_KAN654-4_6.tif:0012-1038	2.886	26.21	0	205	40.358	117.89	0.829	75.632	5871	1.389	0.72	0.887	2.61383
472	NCS1_KAN654-4_6.tif:0013-1142	1.481	4.104	0	25	104.197	129.659	0.689	6.08	472	2.546	0.393	0.885	0.210139
473	NCS1_KAN654-4_6.tif:0014-1155	2.023	21.006	0	182	62.008	131.146	0.894	42.486	3298	1.468	0.681	0.96	1.4683
474	NCS1_KAN654-4_6.tif:0015-1159	2.357	36.749	0	482	102.673	131.544	0.885	86.633	6725	1.246	0.803	0.948	2.99404
475	NCS1_KAN654-4_6.tif:0016-1172	1.366	3.462	0	21	97.601	133.041	0.944	4.728	367	1.293	0.773	0.946	0.163392
										3476.92				1.54796
476	NCS1_KAN654-5_1.tif:0001-0067	1.572	5.754	0	27	24.076	7.613	0.913	9.043	702	1.158	0.864	0.931	0.333665
477	NCS1_KAN654-5_1.tif:0002-0086	1.984	27.636	0	186	136.3	9.752	0.877	54.827	4256	1.492	0.67	0.945	2.02291
478	NCS1_KAN654-5_1.tif:0003-0176	4.225	6.747	0	35	31.019	20.101	0.651	28.508	2213	1.121	0.892	0.793	1.05185
479	NCS1_KAN654-5_1.tif:0004-0170	1.855	6.042	0	35	66.22	19.334	0.74	11.208	870	2.134	0.469	0.878	0.413517
480	NCS1_KAN654-5_1.tif:0005-0185	2.138	21.777	0	144	87.77	20.962	0.936	46.569	3615	1.232	0.812	0.951	1.71823
481	NCS1_KAN654-5_1.tif:0006-0224	2.705	8.352	0	73	15.055	25.38	0.915	22.595	1754	1.184	0.845	0.925	0.833688
482	NCS1_KAN654-5_1.tif:0007-0230	3.246	4.528	0	27	27.058	26.115	0.656	14.699	1141	1.77	0.565	0.828	0.542325
483	NCS1_KAN654-5_1.tif:0008-0390	3.375	11.698	0	223	75.194	44.238	0.763	39.484	3065	1.547	0.647	0.876	1.45682
484	NCS1_KAN654-5_1.tif:0009-0492	2.37	7.478	0	36	111.377	55.973	0.902	17.726	1376	1.404	0.712	0.956	0.654022
485	NCS1_KAN654-5_1.tif:0010-0634	2.061	7.65	0	54	38.887	72.014	0.925	15.768	1224	1.201	0.833	0.938	0.581776
486	NCS1_KAN654-5_1.tif:0011-0765	2.795	22.152	0	289	112.954	86.813	0.868	61.925	4807	1.353	0.739	0.929	2.2848
487	NCS1_KAN654-5_1.tif:0012-0837	2.267	7.688	0	63	45.588	95.021	0.913	17.43	1353	1.454	0.688	0.946	0.64309
488	NCS1_KAN654-5_1.tif:0013-0951	2.499	5.448	0	26	129.662	107.978	0.88	13.617	1057	1.503	0.665	0.942	0.502399
489	NCS1_KAN654-5_1.tif:0014-1020	2.177	4.154	0	26	5.231	115.767	0.886	9.043	702	1.385	0.722	0.952	0.333665
490	NCS1_KAN654-5_1.tif:0015-1079	2.615	4.768	0	25	34.842	122.523	0.893	12.47	968	1.507	0.663	0.935	0.460097
491	NCS1_KAN654-5_1.tif:0016-1105	1.533	6.05	0	27	100.867	125.377	0.866	9.275	720	1.026	0.975	0.915	0.342221
492	NCS1_KAN654-5_2.tif:0001-0053	2.576	11.98	0	141	94.078	6.003	0.928	30.866	2396	1.455	0.687	0.957	1.13884
493	NCS1_KAN654-5_2.tif:0002-0079	2.087	7.84	0	42	122.139	8.915	0.96	16.36	1270	1.053	0.95	0.942	0.60364
494	NCS1_KAN654-5_2.tif:0003-0105	2.28	6.356	0	36	84.42	11.911	0.931	14.493	1125	1.249	0.8	0.929	0.53472
495	NCS1_KAN654-5_2.tif:0004-0190	2.641	9.6	0	52	123.161	21.779	0.706	25.352	1968	1.423	0.703	0.852	0.935404
496	NCS1_KAN654-5_2.tif:0005-0199	2.138	13.596	0	110	110.053	22.526	0.891	29.075	2257	1.197	0.835	0.954	1.07277
497	NCS1_KAN654-5_2.tif:0006-0267	2.01	3.936	0	21	44.346	30.312	0.801	7.91	614	1.555	0.643	0.855	0.291838
498	NCS1_KAN654-5_2.tif:0007-0370	2.242	22.466	0	189	38.159	42.043	0.947	50.357	3909	1.074	0.931	0.938	1.85797
499	NCS1_KAN654-5_2.tif:0008-0422	1.997	4.994	0	31	144.211	47.884	0.953	9.971	774	1.123	0.891	0.951	0.367888
500	NCS1_KAN654-5_2.tif:0009-0555	2.01	6.051	0	36	71.871	63.009	0.925	12.161	944	1.201	0.833	0.931	0.44869
501	NCS1_KAN654-5_2.tif:0010-0570	2.473	36.359	0	315	90.273	64.742	0.863	89.931	6981	1.421	0.704	0.919	3.31812
502	NCS1_KAN654-5_2.tif:0011-0609	2.783	5.38	0	39	121.49	69.293	0.705	14.969	1162	1.639	0.61	0.866	0.552307
503	NCS1_KAN654-5_2.tif:0012-0638	2.731	18.269	0	102	67.173	72.469	0.924	49.893	3873	1.162	0.861	0.932	1.84086
504	NCS1_KAN654-5_2.tif:0013-0675	2.306	3.81	0	17	46.23	76.675	0.942	8.786	682	1.295	0.772	0.945	0.324159
505	NCS1_KAN654-5_2.tif:0014-0897	1.919	13.114	0	99	9.719	101.805	0.94	25.172	1954	1.126	0.888	0.931	0.92875
506	NCS1_KAN654-5_2.tif:0015-0935	2.035	7.753	0	48	25.027	106.15	0.909	15.781	1225	1.03	0.971	0.969	0.582251
507	NCS1_KAN654-5_2.tif:0016-1108	1.816	7.78	0	39	101.535	125.829	0.949	14.132	1097	1.2	0.833	0.946	0.521412
508	NCS1_KAN654-5_2.tif:0017-1120	2.061	4.181	0	26	136.653	127.189	0.959	8.618	669	1.275	0.784	0.958	0.31798
509	NCS1_KAN654-5_2.tif:0018-1188	1.881	4.192	0	25	87.159	134.826	0.931	7.884	612	1.231	0.812	0.951	0.290888
510	NCS1_KAN654-5_3.tif:0001-0058	2.306	8.173	0	58	73.953	6.559	0.929	18.847	1463	1.21	0.826	0.945	0.695374
511	NCS1_KAN654-5_3.tif:0002-0081	2.589	14.373	0	178	110.482	9.181	0.876	37.217	2889	1.45	0.689	0.916	1.37316
512	NCS1_KAN654-5_3.tif:0003-0203	2.293	6.27	0	48	118.896	23.086	0.924	14.377	1116	1.038	0.963	0.944	0.530442
513	NCS1_KAN654-5_3.tif:0004-0376	2.074	10.13	0	58	88.097	42.735	0.908	21.011	1631	1.188	0.842	0.939	0.775226
514	NCS1_KAN654-5_3.tif:0005-0456	2.293	15.169	0	142	62.292	51.771	0.915	34.782	2700	1.284	0.779	0.934	1.28333
515	NCS1_KAN654-5_3.tif:0006-0519	2.68	20.538	0	259	116.643	58.943	0.895	55.033	4272	1.348	0.742	0.943	2.03051
516	NCS1_KAN654-5_3.tif:0007-0736	2.19	18.394	0	141	115.11	83.571	0.922	40.283	3127	1.1	0.909	0.974	1.48628
517	NCS1_KAN654-5_3.tif:0008-0818	1.378	3.991	0	20	34.316	92.826	0.811	5.501	427	1.989	0.503	0.947	0.202956
518	NCS1_KAN654-5_3.tif:0009-0830	2.435	8.989	0	94	23.883	94.259	0.927	21.887	1699	1.235	0.81	0.945	0.807546
519	NCS1_KAN654-5_3.tif:0010-1064	2.293	14.056	0	170	103.993	120.751	0.955	32.231	2502	1.119	0.893	0.973	1.18922
520	NCS1_KAN654-5_3.tif:0011-1080	2.28	22.977	0	233	138.994	122.579	0.897	52.392	4067	1.213	0.825	0.939	1.93307
521	NCS1_KAN654-5_3.tif:0012-1090	2.731	6.047	0	31	110.12	123.785	0.866	16.515	1282	1.4	0.714	0.928	0.609343
522	NCS1_KAN654-5_3.tif:0013-1097	2.035	3.671	0	18	131.803	124.475	0.73	7.472	580	2.284	0.438	0.946	0.275678
523	NCS1_KAN654-5_3.tif:0014-1260	2.126	10.958	0	120	97.811	143.033	0.954	23.291	1808	1.084	0.923	0.946	0.859355
524	NCS1_KAN654-5_4.tif:0001-0009	2.151	13.443	0	150	68.925	0.979	0.896	28.921	2245	1.256	0.796	0.954	1.06706
525	NCS1_KAN654-5_4.tif:0002-0017	2.319	17.933	0	102	89.461	2.005	0.947	41.584	3228	1.172	0.853	0.935	1.53429
526	NCS1_KAN654-5_4.tif:0003-0102	2.731	16.415	0	227	29.87	11.534	0.866	44.83	3480	1.236	0.809	0.922	1.65407
527	NCS1_KAN654-5_4.tif:0004-0196	2.074	18.95	0	178	5.08	22.227	0.94	39.304	3051	1.075	0.93	0.958	1.45016
528	NCS1_KAN654-5_4.tif:0005-0274	2.705	7.114	0	163	126.403	31.098	0.924	19.246	1494	1.351	0.74	0.955	0.710108
529	NCS1_KAN654-5_4.tif:0006-0277	3.427	11.571	0	76	45.626	31.523	0.855	39.652	3078	1.259	0.794	0.905	1.46299
530	NCS1_KAN654-5_4.tif:0007-0400	2.203	10.485	0	70	35.45	45.449	0.918	23.098	1793	1.155	0.866	0.953	0.852225
531	NCS1_KAN654-5_4.tif:0008-0419	2.383	6.216	0	29	77.214	47.595	0.803	14.815	1150	1.689	0.592	0.918	0.546603
532	NCS1_KAN654-5_4.tif:0009-0425	1.791	6.583	0	31	71.898	48.247	0.901	11.787	915	1.364	0.733	0.906	0.434906
533	NCS1_KAN654-5_4.tif:0010-0517	2.873	8.726	0	140	33.318	58.806	0.728	25.069	1946	1.624	0.616	0.888	0.924947
534	NCS1_KAN654-5_4.tif:0011-0672	2.615	4.877	0	32	130.188	76.267	0.84	12.753	990	1.321	0.757	0.896	0.470554
535	NCS1_KAN654-5_4.tif:0012-0715	2.074	17.54	0	234	51.542	81.202	0.917	36.379	2824	1.109	0.902	0.953	1.34227
536	NCS1_KAN654-5_4.tif:0013-0811	2.538	18.299	0	203	10.443	92.06	0.874	46.441	3605	1.311	0.763	0.938	1.71348
537	NCS1_KAN654-5_4.tif:0014-0901	1.958	5.454	0	34	137.312	102.337	0.934	10.679	829	1.127	0.888	0.935	0.394029
538	NCS1_KAN654-5_4.tif:0015-0974	2.151	5.144	0	56	46.375	110.577	0.941	11.066	859	1.114	0.898	0.946	0.408289
539	NCS1_KAN654-5_4.tif:0016-1030	2.86	20.491	0	284	96.101	116.833	0.828	58.601	4549	1.367	0.732	0.933	2.16217
540	NCS1_KAN654-5_4.tif:0017-1052	2.783	6.352	0	29	17.542	119.488	0.933	17.674	1372	1.148	0.871	0.923	0.652121
541	NCS1_KAN654-5_4.tif:0018-1135	1.378	3.916	0	20	106.624	128.94	0.913	5.398	419	1.173	0.853	0.915	0.199154
542	NCS1_KAN654-5_4.tif:0019-1180	3.272	4.846	0	29	99.169	133.9	0.685	15.858	1231	2.299	0.435	0.893	0.585103
543	NCS1_KAN654-5_4.tif:0020-1184	2.203	10.912	0	130	22.866	134.46	0.875	24.038	1866	1.169	0.855	0.945	0.886923
544	NCS1_KAN654-5_5.tif:0001-0026	1.829	3.901	0	23	62.539	3.016	0.906	7.137	554	1.024	0.977	0.934	0.26332
545	NCS1_KAN654-5_5.tif:0002-0077	2.435	27.265	0	344	29.42	8.769	0.936	66.382	5153	1.115	0.897	0.969	2.44926
546	NCS1_KAN654-5_5.tif:0003-0109	1.404	3.706	0	17	135.819	12.37	0.722	5.204	404	2.047	0.489	0.883	0.192024
547	NCS1_KAN654-5_5.tif:0004-0162	2.499	14.345	0	235	17.408	18.39	0.853	35.851	2783	1.358	0.737	0.917	1.32278
548	NCS1_KAN654-5_5.tif:0005-0177	3.002	6.764	0	63	129.551	20.117	0.831	20.302	1576	1.19	0.84	0.884	0.749084
549	NCS1_KAN654-5_5.tif:0006-0214	1.919	5.973	0	64	104.813	24.368	0.95	11.465	890	1.053	0.95	0.952	0.423023
550	NCS1_KAN654-5_5.tif:0007-0295	2.808	28.005	0	290	71.726	33.461	0.813	78.646	6105	1.451	0.689	0.908	2.90175
551	NCS1_KAN654-5_5.tif:0008-0375	2.602	17.683	0	203	110.372	42.58	0.704	46.015	3572	1.585	0.631	0.849	1.6978
552	NCS1_KAN654-5_5.tif:0009-0439	1.314	3.951	0	15	107.867	49.911	0.764	5.192	403	1.965	0.509	0.883	0.191549
553	NCS1_KAN654-5_5.tif:0010-0513	4.006	15.823	0	93	125.92	58.26	0.847	63.394	4921	1.089	0.918	0.898	2.33899
554	NCS1_KAN654-5_5.tif:0011-0612	1.791	3.835	0	19	1.101	69.48	0.66	6.866	533	2.56	0.391	0.835	0.253339
555	NCS1_KAN654-5_5.tif:0012-0621	2.19	4.341	0	23	86.322	70.461	0.926	9.507	738	1.229	0.814	0.934	0.350776
556	NCS1_KAN654-5_5.tif:0013-0644	1.945	4.238	0	27	36.889	73.161	0.953	8.245	640	1.099	0.91	0.944	0.304196
557	NCS1_KAN654-5_5.tif:0014-0655	1.314	4.137	0	26	14.786	74.358	0.651	5.436	422	2.072	0.483	0.779	0.20058
558	NCS1_KAN654-5_5.tif:0015-0703	2.267	9.443	0	96	76.355	79.815	0.922	21.41	1662	1.145	0.874	0.962	0.78996
559	NCS1_KAN654-5_5.tif:0016-0725	2.757	5.724	0	45	98.638	82.335	0.72	15.781	1225	1.389	0.72	0.826	0.582251
560	NCS1_KAN654-5_5.tif:0017-0746	1.301	4.01	0	20	139.782	84.726	0.651	5.217	405	2.083	0.48	0.821	0.192499
561	NCS1_KAN654-5_5.tif:0018-0793	2.435	22.82	0	203	134.865	89.99	0.918	55.561	4313	1.212	0.825	0.92	2.05
562	NCS1_KAN654-5_5.tif:0019-0819	2.615	13.956	0	167	42.808	93.007	0.873	36.495	2833	1.337	0.748	0.921	1.34654
563	NCS1_KAN654-5_5.tif:0020-0941	1.481	4.261	0	32	113.086	106.827	0.753	6.312	490	1.943	0.515	0.891	0.2329
564	NCS1_KAN654-5_5.tif:0021-0987	3.478	12.293	0	70	69.261	112.04	0.919	42.756	3319	1.127	0.887	0.918	1.57754
565	NCS1_KAN654-5_5.tif:0022-0988	2.473	19.328	0	135	96.541	112.104	0.932	47.806	3711	1.051	0.952	0.937	1.76386
566	NCS1_KAN654-5_5.tif:0023-1020	2.486	4.637	0	26	57.621	115.77	0.937	11.53	895	1.392	0.719	0.946	0.4254
567	NCS1_KAN654-5_5.tif:0024-1190	1.816	13.284	0	152	3.401	135.142	0.854	24.128	1873	1.411	0.709	0.94	0.89025
568	NCS1_KAN654-5_6.tif:0001-0007	1.765	5.161	0	26	40.012	0.79	0.874	9.108	707	1.371	0.73	0.929	0.336042
569	NCS1_KAN654-5_6.tif:0002-0035	1.546	5.183	0	32	138.825	3.974	0.925	8.013	622	1.032	0.969	0.934	0.295641
570	NCS1_KAN654-5_6.tif:0003-0036	1.43	5.649	0	33	42.168	4.123	0.764	8.077	627	1.588	0.63	0.888	0.298017
571	NCS1_KAN654-5_6.tif:0004-0097	2.293	7.045	0	44	29.751	11.078	0.924	16.154	1254	1.257	0.796	0.952	0.596035
572	NCS1_KAN654-5_6.tif:0005-0133	2.319	25.817	0	291	84.175	15.138	0.903	59.864	4647	1.328	0.753	0.942	2.20875
573	NCS1_KAN654-5_6.tif:0006-0175	1.636	3.457	0	18	61.961	19.883	0.699	5.655	439	2.015	0.496	0.852	0.20866
574	NCS1_KAN654-5_6.tif:0007-0192	2.461	12.099	0	78	60.313	21.748	0.886	29.771	2311	1.404	0.712	0.941	1.09843
575	NCS1_KAN654-5_6.tif:0008-0198	2.048	25.937	0	243	4.607	22.469	0.953	53.126	4124	1.117	0.895	0.952	1.96017
576	NCS1_KAN654-5_6.tif:0009-0209	2.744	3.873	0	19	128.475	23.783	0.863	10.628	825	1.406	0.711	0.918	0.392128
577	NCS1_KAN654-5_6.tif:0010-0223	1.997	12.445	0	60	140.179	25.356	0.929	24.85	1929	1.11	0.901	0.942	0.916867
578	NCS1_KAN654-5_6.tif:0011-0245	1.623	8.865	0	60	47.729	27.866	0.943	14.389	1117	1.262	0.792	0.958	0.530918
579	NCS1_KAN654-5_6.tif:0012-0247	2.177	37.775	0	410	15.315	28.103	0.953	82.24	6384	1.203	0.831	0.955	3.03436
580	NCS1_KAN654-5_6.tif:0013-0249	2.035	20.038	0	137	112.67	28.244	0.923	40.785	3166	1.099	0.91	0.946	1.50482
581	NCS1_KAN654-5_6.tif:0014-0356	2.035	33.165	0	396	58.549	40.446	0.947	67.503	5240	1.061	0.943	0.952	2.49061
582	NCS1_KAN654-5_6.tif:0015-0363	2.911	19.54	0	190	80.197	41.355	0.819	56.888	4416	1.18	0.847	0.886	2.09896
583	NCS1_KAN654-5_6.tif:0016-0404	1.378	7.626	0	40	28.564	45.893	0.924	10.512	816	1.045	0.957	0.951	0.38785
584	NCS1_KAN654-5_6.tif:0017-0433	3.066	15.412	0	134	113.762	49.096	0.724	47.252	3668	2.012	0.497	0.896	1.74343
585	NCS1_KAN654-5_6.tif:0018-0529	1.353	3.705	0	22	66.01	60.145	0.734	5.011	389	1.892	0.528	0.84	0.184894
586	NCS1_KAN654-5_6.tif:0019-0541	2.061	6.206	0	30	1.522	61.398	0.911	12.792	993	1.22	0.819	0.95	0.47198
587	NCS1_KAN654-5_6.tif:0020-0573	2.035	18.019	0	139	32.562	65.069	0.923	36.676	2847	1.081	0.925	0.955	1.3532
588	NCS1_KAN654-5_6.tif:0021-0602	1.829	4.796	0	25	83.162	68.338	0.687	8.773	681	2.139	0.468	0.858	0.323684
589	NCS1_KAN654-5_6.tif:0022-0618	2.448	8.174	0	48	5.262	70.146	0.882	20.006	1553	1.45	0.69	0.936	0.738152
590	NCS1_KAN654-5_6.tif:0023-0737	1.997	37.09	0	345	36.396	83.676	0.953	74.06	5749	1.083	0.924	0.945	2.73254
591	NCS1_KAN654-5_6.tif:0024-0865	2.345	16.549	0	148	99.932	98.241	0.958	38.801	3012	1.041	0.961	0.936	1.43162
592	NCS1_KAN654-5_6.tif:0025-0877	1.804	4.143	0	16	14.931	99.563	0.903	7.472	580	1.102	0.908	0.952	0.275678
593	NCS1_KAN654-5_6.tif:0026-0889	2.293	9.118	0	59	134.941	100.935	0.924	20.908	1623	1.241	0.806	0.96	0.771423
594	NCS1_KAN654-5_6.tif:0027-0995	2.151	20.18	0	211	43.124	112.933	0.941	43.413	3370	1.175	0.851	0.944	1.60178
595	NCS1_KAN654-5_6.tif:0028-1133	1.907	10.236	0	54	57.424	128.599	0.944	19.517	1515	1.167	0.857	0.952	0.72009
596	NCS1_KAN654-5_6.tif:0029-1186	1.881	17.856	0	83	48.651	134.644	0.931	33.584	2607	1.235	0.81	0.954	1.23913
597	NCS1_KAN654-5_6.tif:0030-1222	2.151	7.677	0	62	11.267	138.759	0.941	16.515	1282	1.179	0.848	0.944	0.609343
598	NCS1_KAN654-5_6.tif:0031-1248	1.842	11.783	0	65	33.381	141.686	0.947	21.707	1685	1.138	0.879	0.969	0.800892
										2103.9				1
599	NCS1_KAN654-6_1.tif:0001-0067	2.963	29.87	0	497	74.302	7.659	0.731	88.501	6870	1.554	0.644	0.883	3.26536
600	NCS1_KAN654-6_1.tif:0002-0210	2.37	27.967	0	330	117.258	23.874	0.862	66.292	5146	1.354	0.739	0.934	2.44593
601	NCS1_KAN654-6_1.tif:0003-0472	3.027	35.332	0	596	119.419	53.737	0.803	106.961	8303	1.357	0.737	0.923	3.94647
602	NCS1_KAN654-6_1.tif:0004-0491	1.378	3.458	0	18	110.04	55.722	0.736	4.766	370	1.367	0.732	0.87	0.175864
603	NCS1_KAN654-6_1.tif:0005-0565	1.662	3.767	0	19	87.31	64.061	0.761	6.261	486	1.197	0.835	0.875	0.230999
604	NCS1_KAN654-6_1.tif:0006-0657	2.357	39.678	0	479	5.956	74.617	0.869	93.538	7261	1.291	0.775	0.91	3.4512
605	NCS1_KAN654-6_1.tif:0007-0664	2.01	43.122	0	479	63.361	75.373	0.911	86.659	6727	1.158	0.864	0.948	3.19739
606	NCS1_KAN654-6_1.tif:0008-0694	1.288	4.22	0	18	12.475	78.671	0.67	5.436	422	1.723	0.58	0.833	0.20058
607	NCS1_KAN654-6_1.tif:0009-0837	1.469	3.623	0	14	122.133	94.961	0.755	5.32	413	1.712	0.584	0.877	0.196302
608	NCS1_KAN654-6_1.tif:0010-0942	2.422	32.883	0	382	26.403	106.989	0.901	79.638	6182	1.332	0.751	0.938	2.93835
609	NCS1_KAN654-6_1.tif:0011-1053	1.971	38.529	0	348	105.403	119.487	0.965	75.941	5895	1.083	0.923	0.95	2.80193
610	NCS1_KAN654-6_1.tif:0012-1063	1.713	36.12	0	326	37.005	120.646	0.968	61.886	4804	1.018	0.983	0.971	2.28337
611	NCS1_KAN654-6_2.tif:0001-0019	3.092	24.087	0	287	79.975	2.138	0.811	74.472	5781	1.405	0.712	0.934	2.74775
612	NCS1_KAN654-6_2.tif:0002-0070	2.602	28.896	0	294	20.946	8.014	0.908	75.194	5837	1.163	0.859	0.927	2.77437
613	NCS1_KAN654-6_2.tif:0003-0112	1.366	3.274	0	19	28.55	12.695	0.745	4.47	347	2.463	0.406	0.869	0.164931
614	NCS1_KAN654-6_2.tif:0004-0166	2.422	33.606	0	273	107.069	18.805	0.922	81.39	6318	1.156	0.865	0.945	3.00299
615	NCS1_KAN654-6_2.tif:0005-0208	2.306	15.48	0	93	89.604	23.667	0.92	35.697	2771	1.107	0.903	0.927	1.31708
616	NCS1_KAN654-6_2.tif:0006-0215	2.332	27.044	0	138	25.658	24.378	0.952	63.059	4895	1.216	0.822	0.945	2.32663
617	NCS1_KAN654-6_2.tif:0007-0216	1.456	3.681	0	13	85.276	24.577	0.781	5.359	416	2.109	0.474	0.9	0.197728
618	NCS1_KAN654-6_2.tif:0008-0294	1.52	4.508	0	19	39.68	33.418	0.816	6.853	532	1.896	0.527	0.911	0.252863
619	NCS1_KAN654-6_2.tif:0009-0335	2.19	35.753	0	392	15.477	38.037	0.935	78.298	6078	1.101	0.908	0.952	2.88892
620	NCS1_KAN654-6_2.tif:0010-0344	1.919	30.45	0	302	138.31	39.13	0.976	58.447	4537	1.031	0.97	0.958	2.15647
621	NCS1_KAN654-6_2.tif:0011-0357	2.847	30.217	0	349	45.454	40.479	0.841	86.028	6678	1.465	0.683	0.929	3.1741
622	NCS1_KAN654-6_2.tif:0012-0378	2.345	3.978	0	18	85.712	42.828	0.685	9.327	724	1.402	0.713	0.843	0.344122
623	NCS1_KAN654-6_2.tif:0013-0406	3.233	22.494	0	370	86.298	46.227	0.711	72.733	5646	1.519	0.658	0.873	2.68358
624	NCS1_KAN654-6_2.tif:0014-0491	1.456	5.018	0	35	120.809	55.741	0.752	7.304	567	2.221	0.45	0.856	0.269499
625	NCS1_KAN654-6_2.tif:0015-0496	1.816	30.099	0	124	88.474	56.341	0.924	54.672	4244	1.154	0.866	0.937	2.0172
626	NCS1_KAN654-6_2.tif:0016-0530	2.911	36.226	0	458	116.99	60.179	0.843	105.467	8187	1.112	0.899	0.911	3.89134
627	NCS1_KAN654-6_2.tif:0017-0560	1.301	3.347	0	18	5.407	63.625	0.68	4.354	338	2.475	0.404	0.849	0.160654
628	NCS1_KAN654-6_2.tif:0018-0582	2.512	20.81	0	229	41.953	66.045	0.917	52.276	4058	1.13	0.885	0.922	1.9288
629	NCS1_KAN654-6_2.tif:0019-0771	2.551	34.773	0	239	70.933	87.509	0.949	88.694	6885	1.165	0.859	0.957	3.27249
630	NCS1_KAN654-6_2.tif:0020-0842	1.907	4.331	0	21	135.07	95.562	0.944	8.258	641	1.141	0.877	0.955	0.304672
631	NCS1_KAN654-6_2.tif:0021-0861	1.971	4.229	0	18	4.221	97.688	0.652	8.335	647	2.56	0.391	0.836	0.307524
632	NCS1_KAN654-6_2.tif:0022-0895	2.306	34.737	0	372	100.524	101.582	0.951	80.102	6218	1.137	0.88	0.955	2.95546
633	NCS1_KAN654-6_2.tif:0023-1021	1.765	3.752	0	18	123.677	116.007	0.897	6.621	514	1.125	0.889	0.935	0.244308
634	NCS1_KAN654-6_2.tif:0024-1026	2.074	32.267	0	292	19.286	116.549	0.886	66.923	5195	1.179	0.849	0.942	2.46922
635	NCS1_KAN654-6_2.tif:0025-1162	2.654	36.316	0	455	116.54	131.852	0.867	96.372	7481	1.402	0.713	0.932	3.55577
636	NCS1_KAN654-6_2.tif:0026-1234	2.293	29.135	0	312	38.617	140.112	0.873	66.807	5186	1.423	0.703	0.918	2.46494
637	NCS1_KAN654-6_2.tif:0027-1264	2.023	3.707	0	29	123	143.528	0.907	7.497	582	1.353	0.739	0.935	0.276629
638	NCS1_KAN654-6_3.tif:0001-0068	1.971	25.373	0	130	14.147	7.775	0.894	50.009	3882	1.242	0.805	0.939	1.84514
639	NCS1_KAN654-6_3.tif:0002-0153	2.28	3.48	0	22	106.031	17.361	0.793	7.935	616	1.476	0.678	0.915	0.292789
640	NCS1_KAN654-6_3.tif:0003-0155	2.383	42.443	0	293	103.239	17.666	0.95	101.151	7852	1.074	0.931	0.937	3.73211
641	NCS1_KAN654-6_3.tif:0004-0215	1.881	23.582	0	153	7.199	24.46	0.956	44.354	3443	1.09	0.918	0.951	1.63648
642	NCS1_KAN654-6_3.tif:0005-0232	1.288	4.93	0	30	59.239	26.351	0.891	6.351	493	1.521	0.657	0.952	0.234326
643	NCS1_KAN654-6_3.tif:0006-0247	2.1	51.626	0	580	71.73	28.132	0.919	108.404	8415	1.188	0.841	0.942	3.99971
644	NCS1_KAN654-6_3.tif:0007-0264	2.68	22.505	0	303	26.53	30.033	0.857	60.302	4681	1.163	0.86	0.924	2.22491
645	NCS1_KAN654-6_3.tif:0008-0401	1.378	3.561	0	18	0.745	45.58	0.913	4.908	381	1.347	0.742	0.926	0.181092
646	NCS1_KAN654-6_3.tif:0009-0485	2.473	33.75	0	385	137.817	55.075	0.879	83.477	6480	1.289	0.776	0.941	3.07999
647	NCS1_KAN654-6_3.tif:0010-0511	1.301	3.941	0	17	91.058	58.043	0.669	5.127	398	1.845	0.542	0.815	0.189172
648	NCS1_KAN654-6_3.tif:0011-0517	2.744	36.286	0	344	74.544	58.713	0.889	99.567	7729	1.134	0.882	0.916	3.67365
649	NCS1_KAN654-6_3.tif:0012-0532	1.494	3.172	0	16	123.133	60.367	0.76	4.741	368	1.905	0.525	0.879	0.174913
650	NCS1_KAN654-6_3.tif:0013-0564	2.074	4.037	0	20	124.967	63.883	0.684	8.373	650	1.804	0.554	0.868	0.308949
651	NCS1_KAN654-6_3.tif:0014-0637	2.486	39.544	0	538	82.076	72.427	0.895	98.317	7632	1.228	0.814	0.939	3.62754
652	NCS1_KAN654-6_3.tif:0015-0757	1.378	6.271	0	31	110.052	86.013	0.736	8.644	671	1.42	0.704	0.87	0.318931
653	NCS1_KAN654-6_3.tif:0016-0882	2.28	40.04	0	475	47.527	100.155	0.885	91.297	7087	1.147	0.872	0.959	3.3685
654	NCS1_KAN654-6_3.tif:0017-0899	1.945	6.675	0	32	81.06	102.055	0.953	12.985	1008	1.199	0.834	0.95	0.479109
655	NCS1_KAN654-6_3.tif:0018-0921	2.77	28.842	0	387	138.747	104.471	0.843	79.883	6201	1.402	0.713	0.923	2.94738
656	NCS1_KAN654-6_3.tif:0019-1084	2.138	31.596	0	316	14.171	123.147	0.904	67.567	5245	1.479	0.676	0.943	2.49298
657	NCS1_KAN654-6_3.tif:0020-1188	2.267	32.085	0	315	91.709	134.825	0.945	72.746	5647	1.097	0.911	0.964	2.68406
658	NCS1_KAN654-6_3.tif:0021-1272	1.726	34.619	0	240	11.256	144.482	0.888	59.761	4639	1.325	0.755	0.954	2.20495
659	NCS1_KAN654-6_4.tif:0001-0006	1.52	35.653	0	305	117.642	0.688	0.835	54.196	4207	1.716	0.583	0.948	1.99962
660	NCS1_KAN654-6_4.tif:0002-0148	2.1	48.957	0	317	86.565	16.858	0.875	102.8	7980	1.271	0.787	0.939	3.79295
661	NCS1_KAN654-6_4.tif:0003-0207	2.1	36.209	0	328	20.116	23.569	0.952	76.031	5902	1.087	0.92	0.959	2.80526
662	NCS1_KAN654-6_4.tif:0004-0375	2.126	42.794	0	323	120.702	42.591	0.93	90.962	7061	1.169	0.855	0.946	3.35614
663	NCS1_KAN654-6_4.tif:0005-0483	1.726	30.336	0	315	36.213	54.837	0.922	52.366	4065	1.073	0.932	0.971	1.93212
664	NCS1_KAN654-6_4.tif:0006-0540	2.319	41.539	0	369	124.06	61.351	0.934	96.321	7477	1.159	0.863	0.952	3.55387
665	NCS1_KAN654-6_4.tif:0007-0584	2.151	38.581	0	400	143.467	66.24	0.965	83	6443	1.033	0.968	0.957	3.0624
666	NCS1_KAN654-6_4.tif:0008-0590	1.443	3.438	0	19	47.207	67.005	0.792	4.96	385	1.767	0.566	0.914	0.182993
667	NCS1_KAN654-6_4.tif:0009-0621	1.971	45.641	0	363	42.363	70.531	0.965	89.957	6983	1.134	0.882	0.947	3.31907
668	NCS1_KAN654-6_4.tif:0010-0695	2.242	45.443	0	489	142.214	78.972	0.934	101.86	7907	1.16	0.862	0.961	3.75825
669	NCS1_KAN654-6_4.tif:0011-0803	1.971	24.052	0	190	11.025	91.181	0.917	47.407	3680	1.137	0.879	0.933	1.74913
670	NCS1_KAN654-6_4.tif:0012-0923	1.52	3.593	0	21	26.292	104.792	0.733	5.462	424	1.977	0.506	0.861	0.20153
671	NCS1_KAN654-6_4.tif:0013-0948	2.486	28.342	0	360	70.501	107.62	0.779	70.466	5470	1.552	0.644	0.915	2.59993
672	NCS1_KAN654-6_4.tif:0014-0984	1.919	22.732	0	202	6.842	111.733	0.965	43.632	3387	1.14	0.877	0.94	1.60986
673	NCS1_KAN654-6_4.tif:0015-1000	2.113	40.396	0	401	98.79	113.567	0.925	85.345	6625	1.203	0.831	0.937	3.14891
674	NCS1_KAN654-6_4.tif:0016-1006	1.829	27.211	0	103	137.216	114.267	0.916	49.777	3864	1.115	0.897	0.959	1.83659
675	NCS1_KAN654-6_4.tif:0017-1182	1.958	18.849	0	110	94.177	134.177	0.959	36.908	2865	1.088	0.919	0.944	1.36175
676	NCS1_KAN654-6_4.tif:0018-1186	2.035	29.829	0	258	141.868	134.617	0.923	60.714	4713	1.058	0.945	0.949	2.24012
677	NCS1_KAN654-6_5.tif:0001-0095	1.404	3.972	0	18	40.122	10.839	1	5.578	433	1	1	0.965	0.205808
678	NCS1_KAN654-6_5.tif:0002-0150	2.383	26.454	0	264	10.484	16.988	0.886	63.046	4894	1.246	0.802	0.932	2.32615
679	NCS1_KAN654-6_5.tif:0003-0190	2.602	22.936	0	290	138.068	21.637	0.885	59.683	4633	1.022	0.979	0.953	2.2021
680	NCS1_KAN654-6_5.tif:0004-0460	1.494	3.466	0	17	20.564	52.25	0.67	5.179	402	2.206	0.453	0.823	0.191073
681	NCS1_KAN654-6_5.tif:0005-0505	3.878	26.684	0	435	55.752	57.437	0.66	103.47	8032	1.583	0.632	0.824	3.81766
682	NCS1_KAN654-6_5.tif:0006-0563	1.469	3.842	0	19	24.287	63.984	0.673	5.642	438	1.701	0.588	0.838	0.208184
683	NCS1_KAN654-6_5.tif:0007-0610	2.564	30.02	0	376	137.246	69.229	0.864	76.959	5974	1.623	0.616	0.945	2.83948
684	NCS1_KAN654-6_5.tif:0008-0740	2.448	21.368	0	129	119.9	83.894	0.695	52.302	4060	1.72	0.581	0.856	1.92975
685	NCS1_KAN654-6_5.tif:0009-0737	1.378	4.692	0	23	73.075	83.593	0.757	6.467	502	1.743	0.574	0.873	0.238604
686	NCS1_KAN654-6_5.tif:0010-0760	1.546	10.317	0	45	68.64	86.356	0.898	15.948	1238	1.31	0.763	0.923	0.58843
687	NCS1_KAN654-6_5.tif:0011-0790	2.873	8.256	0	41	72.194	89.588	0.748	23.716	1841	1.26	0.794	0.863	0.87504
688	NCS1_KAN654-6_5.tif:0012-0927	2.538	32.289	0	401	125.689	105.331	0.866	81.944	6361	1.192	0.839	0.923	3.02343
689	NCS1_KAN654-6_5.tif:0013-0982	2.461	4.115	0	24	93.011	111.552	0.658	10.125	786	1.672	0.598	0.834	0.373591
690	NCS1_KAN654-6_5.tif:0014-1006	2.332	34.823	0	356	2.785	114.221	0.867	81.197	6303	1.252	0.799	0.916	2.99586
691	NCS1_KAN654-6_5.tif:0015-1019	2.396	31.5	0	352	38.751	115.694	0.871	75.477	5859	1.411	0.709	0.937	2.78482
692	NCS1_KAN654-6_5.tif:0016-1029	1.366	3.708	0	19	90.019	116.792	0.78	5.063	393	1.98	0.505	0.942	0.186796
693	NCS1_KAN654-6_5.tif:0017-1100	1.585	11.789	0	57	65.431	124.92	0.921	18.679	1450	1.196	0.836	0.943	0.689195
694	NCS1_KAN654-6_5.tif:0018-1146	2.37	23.359	0	353	51.068	130.027	0.854	55.368	4298	1.361	0.735	0.918	2.04287
695	NCS1_KAN654-6_6.tif:0001-0038	1.314	4.716	0	27	25.747	4.324	0.855	6.196	481	1.587	0.63	0.944	0.228623
696	NCS1_KAN654-6_6.tif:0002-0097	2.473	31.906	0	309	21.472	11.069	0.941	78.917	6126	1.154	0.867	0.953	2.91173
697	NCS1_KAN654-6_6.tif:0003-0111	2.795	21.318	0	168	131.198	12.49	0.708	59.593	4626	1.562	0.64	0.858	2.19877
698	NCS1_KAN654-6_6.tif:0004-0122	2.267	39.795	0	290	96.17	13.864	0.913	90.227	7004	1.449	0.69	0.949	3.32905
699	NCS1_KAN654-6_6.tif:0005-0138	1.997	30.774	0	299	0.856	15.664	0.84	61.448	4770	1.421	0.704	0.954	2.26721
700	NCS1_KAN654-6_6.tif:0006-0182	1.791	4.647	0	28	94.637	20.568	0.728	8.322	646	1.17	0.855	0.837	0.307048
701	NCS1_KAN654-6_6.tif:0007-0239	2.911	42.739	0	595	94.396	27.197	0.829	124.43	9659	1.279	0.782	0.885	4.59099
702	NCS1_KAN654-6_6.tif:0008-0240	1.649	3.555	0	15	97.844	27.259	0.848	5.861	455	1.25	0.8	0.918	0.216265
703	NCS1_KAN654-6_6.tif:0009-0284	1.816	4.681	0	24	115.597	32.267	0.669	8.502	660	2.369	0.422	0.842	0.313703
704	NCS1_KAN654-6_6.tif:0010-0379	1.958	4.539	0	21	74.893	43.231	0.696	8.889	690	1.162	0.861	0.852	0.327962
705	NCS1_KAN654-6_6.tif:0011-0429	1.7	3.864	0	26	68.738	48.695	0.66	6.57	510	1.632	0.613	0.843	0.242407
706	NCS1_KAN654-6_6.tif:0012-0445	2.177	6.663	0	48	9.156	50.54	0.943	14.505	1126	1.251	0.799	0.931	0.535196
707	NCS1_KAN654-6_6.tif:0013-0453	2.177	53.953	0	576	36.457	51.394	0.93	117.46	9118	1.11	0.901	0.952	4.33385
708	NCS1_KAN654-6_6.tif:0014-0513	2.589	35.08	0	471	97.957	58.18	0.846	90.833	7051	1.379	0.725	0.91	3.35139
709	NCS1_KAN654-6_6.tif:0015-0592	2.538	34.208	0	376	85.307	67.197	0.923	86.813	6739	1.041	0.96	0.959	3.20309
710	NCS1_KAN654-6_6.tif:0016-0613	2.383	30.605	0	331	24.591	69.584	0.847	72.939	5662	1.571	0.637	0.937	2.69119
711	NCS1_KAN654-6_6.tif:0017-0874	2.976	11.333	0	73	57.646	99.132	0.661	33.726	2618	1.96	0.51	0.845	1.24435
712	NCS1_KAN654-6_6.tif:0018-0889	3.298	4.949	0	24	104.471	100.831	0.861	16.322	1267	1.22	0.819	0.926	0.602214
713	NCS1_KAN654-6_6.tif:0019-0927	2.229	26.653	0	331	96.694	105.189	0.877	59.4	4611	1.064	0.94	0.93	2.19164
714	NCS1_KAN654-6_6.tif:0020-0938	2.126	22.321	0	170	17.891	106.509	0.954	47.445	3683	1.258	0.795	0.948	1.75056
715	NCS1_KAN654-6_6.tif:0021-1045	2.538	24.65	0	218	53.428	118.614	0.914	62.556	4856	1.107	0.903	0.934	2.30809
716	NCS1_KAN654-6_6.tif:0022-1133	2.01	13.814	0	259	44.025	128.686	0.984	27.761	2155	1.12	0.893	0.954	1.02429
717	NCS1_KAN654-6_6.tif:0023-1135	2.023	31.924	0	287	127.296	128.805	0.851	64.566	5012	1.198	0.835	0.943	2.38224
718	NCS1_KAN654-6_6.tif:0024-1146	2.113	31.329	0	295	14.509	130.108	0.902	66.189	5138	1.431	0.699	0.948	2.44213
719	NCS1_KAN654-6_6.tif:0025-1145	2.126	31.812	0	349	67.866	129.997	0.94	67.619	5249	1.081	0.925	0.962	2.49489
720	NCS1_KAN654-6_6.tif:0026-1190	1.662	14.473	0	86	34.026	135.084	0.966	24.051	1867	1.138	0.879	0.959	0.887398
721	NCS1_KAN654-6_6.tif:0027-1209	2.113	27.512	0	272	144.259	137.21	0.925	58.125	4512	1.139	0.878	0.943	2.14458
722	NCS1_KAN654-6_6.tif:0028-1221	1.726	22.612	0	108	3.183	138.602	0.937	39.033	3030	1.134	0.882	0.947	1.44018
										3986.35				1.89474

## Sheet: IF condition
Exp. number	Cell line	Culture condition	Fixation condition	Chicken-Alexa488	mouse IgG2a-Alexa568	mouse IgG2b-Alexa647	Nuclear stain	Date	Replicate
KAN654-1	RPE-hTERT		+ FBS for 24 hours, fixed in methanol at -20C for 5 minutes.	NCS1, Cell Signaling, 8237P, 1:500	CEP170, Invitrogen, 41-3200, 1:1000	FGFR1OP, Abnova, H00011116-M01, 1:1000	DAPI	2021-05-14
KAN654-2	RPE-hTERT		- FBS for 24 hours, fixed in methanol at -20C for 5 minutes.	NCS1, Cell Signaling, 8237P, 1:500	CEP170, Invitrogen, 41-3200, 1:1000	FGFR1OP, Abnova, H00011116-M01, 1:1000	DAPI	2021-05-14
KAN654-3	RPE-hTERT		+ FBS for 24 hours, fixed in methanol at -20C for 5 minutes.	NCS1, Cell Signaling, 8237P, 1:500	CEP170, Invitrogen, 41-3200, 1:1000	FGFR1OP, Abnova, H00011116-M01, 1:1000	DAPI	2021-05-14
KAN654-4	RPE-hTERT		- FBS for 24 hours, fixed in methanol at -20C for 5 minutes.	NCS1, Cell Signaling, 8237P, 1:500	CEP170, Invitrogen, 41-3200, 1:1000	FGFR1OP, Abnova, H00011116-M01, 1:1000	DAPI	2021-05-14
KAN654-5	RPE-hTERT		+ FBS for 24 hours, fixed in methanol at -20C for 5 minutes.	NCS1, Cell Signaling, 8237P, 1:500	CEP170, Invitrogen, 41-3200, 1:1000	FGFR1OP, Abnova, H00011116-M01, 1:1000	DAPI	2021-05-14
KAN654-6	RPE-hTERT		- FBS for 24 hours, fixed in methanol at -20C for 5 minutes.	NCS1, Cell Signaling, 8237P, 1:500	CEP170, Invitrogen, 41-3200, 1:1000	FGFR1OP, Abnova, H00011116-M01, 1:1000	DAPI	2021-05-14

## Sheet: Total analysis and statistics
	+FBS			-FBS
	0.631662	0.653569	0.333665	0.349627	2.35249	3.26536
	0.356869	0.269352	2.02291	3.07141	0.25288	2.44593
	0.518204	1.96382	1.05185	2.13317	0.231509	3.94647		Table Analyzed	Identify outliers of Data 1:Cleaned data
	1.97988	0.608158	0.413517	2.61717	0.230174	0.175864		Column B	-FBS
	0.327096	0.250208	1.71823	0.24663	0.897099	0.230999		vs.	vs.
	0.642122	1.1856	0.833688	1.93643	1.37837	3.4512		Column A	+FBS
	0.455843	0.592575	0.542325	0.287265	3.05637	3.19739
	1.1563	2.67928	1.45682	2.69603	0.27425	0.20058		Nested t test
	0.474752	1.66642	0.654022	1.83222	2.68685	0.196302		P value	0.002
	1.46892	0.536479	0.581776	1.81291	3.11558	2.93835		P value summary	**
	0.453429	1.06227	2.2848	2.26795	1.06672	2.80193		Significantly different (P < 0.05)?	Yes
	1.18004	0.855249	0.64309	1.87527	0.163837	2.28337		One- or two-tailed P value?	Two-tailed
	2.78253	1.15042	0.502399	2.00844	2.58578	2.74775		t, df	t=7.159, df=4
	0.348017	0.226612	0.333665	1.99557	0.632199	2.77437		F, DFn, Dfd	51.24, 1, 4
	2.00965	0.90912	0.460097	2.15127	0.327675	0.164931
	0.669883	0.455005	0.342221	0.436531	2.50253	3.00299		How big is the difference?
	0.753971	0.947853	1.13884	0.179843	0.217708	1.31708		Mean of column B	1.777
	2.6558	0.445656	0.60364	1.66083	0.889531	2.32663		Mean of column A	0.9709
	0.572519	0.399799	0.53472	3.83865	1.92865	0.197728		Difference between means (B - A) ± SEM	0.8057 ± 0.1126
	1.33373	0.778228	0.935404	2.37537	0.334798	0.252863		95% confidence interval	0.4932 to 1.118
	0.387044	1.26618	1.07277	0.555621	2.66815	2.88892
	0.249446	0.272914	0.291838	0.144437	2.36807	2.15647		Random effects	SD	Variance
	1.52283	0.784906	1.85797	0.732245	2.72068	3.1741		Variation within subcolumns	0.9272	0.8597
	0.373364	1.94468	0.367888	3.12813	2.42595	0.344122		Variation among subcolumn means	0.1086	0.01179
	0.407965	0.605486	0.44869	2.16133	2.91657	2.68358
	1.6222	0.607712	3.31812	1.52444	0.187434	0.269499		Do the subcolumns differ (within each column)?
	0.383423	0.544493	0.552307	2.38623	3.40942	2.0172		Chi-square, df	2.327, 1
	0.866222	1.63837	1.84086	0.235767	1.49012	3.89134		P value	0.1272
	2.59062	1.3156	0.324159	1.72078	1.09255	0.160654		P value summary	ns
	0.341178	0.921141	0.92875	0.537114	2.14102	1.9288		Is there significant difference between subcolumns (P < 0.05)?	No
	0.185475	2.05019	0.582251	1.94367	3.42456	3.27249
	1.73204	1.3668	0.521412	2.17662	2.54839	0.304672		Data analyzed
	0.716152	0.731481	0.31798	1.86883	3.59463	0.307524		Number of treatments (columns)	2
	0.649767	0.510211	0.290888	1.79038	0.224386	2.95546		Number of subjects (subcolumns)	6
	3.09917	1.14152	0.695374	1.82458	0.166064	0.244308		Total number of values	718
	0.690805	0.744837	1.37316	2.33956	0.167399	2.46922
	1.31442	0.487506	0.530442	1.71997	1.23279	3.55577
	0.463085	1.75057	0.775226	2.44176	0.25377	2.46494
	0.289277	0.91936	1.28333	1.64071	0.239968	0.276629
	2.21162	1.85519	2.03051	0.930997	2.68462	1.84514
	0.507743	2.25321	1.48628	0.65379	0.16918	0.292789
	0.556023	0.621959	0.202956	2.10701	0.188769	3.73211
	0.198752	1.07964	0.807546	2.08328	2.50832	1.63648
	0.376583	0.406922	1.18922	2.17782	3.09421	0.234326
	1.40937	0.278702	1.93307	0.906052	2.59736	3.99971
	1.74974	1.58762	0.609343	0.818746	0.162502	2.22491
	1.8982	0.814735	0.275678	2.13196	0.230619	0.181092
	0.428484	0.901551	0.859355	2.41319	0.154488	3.07999
	0.292496	1.60944	1.06706	1.41541	0.20079	0.189172
	2.1557	0.415381	1.53429	2.17179	0.247982	3.67365
	1.87326	0.502643	1.65407	0.374169	2.97	0.174913
	1.83262	0.214591	1.45016	2.85052	0.1999	0.308949
	1.19734	1.4919	0.710109	1.85113	0.432745	3.62754
	0.307784	0.468807	1.46299	1.77589	1.21186	0.318931
	1.60893	0.262229	0.852225	1.55823	2.06578	3.3685
	2.37939	0.175413	0.546603	1.93763	0.316545	0.479109
	0.186682	0.197228	0.434906	1.75176	2.81685	2.94738
	1.75336	0.223496	0.924947	1.76543	1.0832	2.49298
	0.968414	1.79732	0.470554	2.36048	2.28037	2.68406
	2.30577	0.388669	1.34227	2.30738	2.75541	2.20495
	0.290886	0.303634	1.71348	2.38623	1.42601	1.99962
	0.85214	1.17714	0.394029	2.9161	0.251544	3.79295
	0.619592	1.23101	0.408289	1.59082	3.08175	2.80526
	1.53007	0.533807	2.16217	0.796618	2.16729	3.35614
	0.333131	0.285825	0.652121	1.23234	0.183872	1.93212
	1.68094	0.352162	0.199154	1.45886	2.52702	3.55387
	0.339166	0.601479	0.585103	3.71755	1.54444	3.0624
	2.13397	0.56987	0.886923	3.28987	0.962545	0.182993
	0.358478	1.74923	0.26332	2.05873	0.156714	3.31907
	1.23516	2.02081	2.44926	0.189499	2.07557	3.75825
	1.95453	2.61027	0.192024	1.82458	2.064	1.74913
	1.06618	0.330791	1.32278	0.830012	0.15805	0.20153
	0.460671	0.943401	0.749084	2.36652	2.85068	2.59993
	0.785353	2.61027	0.423023	1.92717	2.21448	1.60986
	2.35163	1.97629	2.90175	0.416816	2.13612	3.14891
	0.251458	1.45806	1.6978	1.98269	2.48784	1.83659
	1.11808	0.247982	0.191549	0.522227	2.8075	1.36175
	0.279621	1.28532	2.33899	2.49164	3.24469	2.24012
	0.70207	1.76704	0.253339	2.4317	2.44421	0.205808
	0.628845	0.428293	0.350776	1.55904	4.95608	2.32615
	1.92918	1.07296	0.304196	3.1056	2.10718	2.2021
	0.414805	1.25104	0.20058	2.10541	0.195893	0.191073
	2.85213	1.7893	0.78996	1.50352	0.235071	3.81766
	2.22932	1.28221	0.582251	2.75598	2.69085	0.208184
	1.80285	2.53013	0.192499	2.43371	2.2866	2.83948
	0.300945	1.00751	2.05	2.91047	2.03506	1.92975
	0.510157	0.676275	1.34654	0.454636	1.65796	0.238604
	0.222087	0.164283	0.2329	1.95413	1.19584	0.58843
	0.852945	2.12766	1.57754	0.339971	0.231955	0.87504
	0.946286	0.585897	1.76386	2.77569	3.3747	3.02343
	0.289277	0.301408	0.4254	1.20136	0.235962	0.373591
	0.548379	0.670487	0.89025	1.36793	2.82263	2.99586
	0.346408	0.18031	0.336042	2.20277	0.358395	2.78482
	0.525446	0.234181	0.295641	2.46348	0.222605	0.186796
	0.411988	0.288942	0.298017	2.30376	0.212365	0.689195
	0.556828	0.401135	0.596035	1.77107	2.61205	2.04287
	1.54254	2.54349	2.20875	3.45925	0.383771	0.228623
	0.361294	1.44293	0.20866	2.0523	2.59647	2.91173
	0.43814	0.820968	1.09843	2.16576	1.57426	2.19877
	0.822367	0.830318	1.96017	2.46308	2.61383	3.32905
	0.45544	2.10941	0.392128	2.21403	0.210139	2.26721
	0.405953	0.393121	0.916867	2.55964	1.4683	0.307048
	0.183061	0.591685	0.530918	2.36612	2.99404	4.59099
	0.387044	2.52702	3.03436	1.86038	0.163392	0.216265
	0.244618	2.88585	1.50482	2.45503		0.313703
	0.276402	0.490622	2.49061	2.16777		0.327962
	2.03902	1.38371	2.09896	2.01729		0.242407
	1.14061	1.75101	0.38785	2.44699		0.535196
	0.380606	0.976792	1.74343	0.869038		4.33385
	1.41339	0.300517	0.184894	2.24783		3.35139
	0.317843	1.15399	0.47198	1.18929		3.20309
	1.37718	1.20474	1.3532	4.01286		2.69119
	1.48702	1.56581	0.323684	3.19009		1.24435
	0.234157	1.02131	0.738152	3.75658		0.602214
	0.416012	0.274695	2.73254	0.810297		2.19164
	1.54858	0.276921	1.43162	2.19352		1.75056
	1.82337	0.622404	0.275678	2.63689		2.30809
	0.795009		0.771423	1.31804		1.02429
	1.83504		1.60178			2.38224
	0.382216		0.72009			2.44213
	0.289679		1.23913			2.49489
	1.13981		0.609343			0.887398
	0.711726		0.800892			2.14458
	1.84751					1.44018
	0.828805
	1.10682
	0.640111
	1.05331
	1.28465
	0.926571
	0.825586
	2.6735
	0.416012
	1.33293
	1.37517
	0.675918
