# Supplementary material for: Myristoylated Neuronal Calcium Sensor-1 captures the preciliary vesicle at distal appendages
Source: eLife. 2025 Jan 30;14:e85998. doi: 10.7554/eLife.85998 (PMC11984960; doi:10.7554/eLife.85998)
Supplement: Figure 2—source data 4. [file elife-85998-fig2-data4.xlsx]

## Sheet: IF condition
Exp. number	Cell line	Culture condition	Fixation condition	488	568	647	Nuclear stain	Date	Replicate
Fig.2D and E
KAN673-2	RPE-FRT9 + LAP7-C3ORF14	Serum starved for 24 hours.	Fixed in 100% methanol at -20C for 5 minutes.	chicken-GFP, Invitrogen, 1:1000	CEP164, sc-515403, Santa Cruz, 1:200	Ninein, ab52473, Abcam, 1:1000		2021-05-25
Fig.2F
KAN426-1	RPE-BFP-Cas9 pMCB306 (pool)	24 hour serum starvation	Fixed in 4% PFA	NCS1, G-4, Santa Cruz, 1:500	CEP164, HPA037605, SIGMA, 1:1000	CEP170, Invitrogen, 41-3200, 1:1000	DAPI	2018-12-24
Fig.2G
KAN426-2	RPE-BFP-Cas9 pMCB306 (pool)	24 hour serum starvation	Fixed in 4% PFA	NCS1, G-4, Santa Cruz, 1:500	CEP89, 24002-1-AP, Proteintech, 1:1000	CEP170, Invitrogen, 41-3200, 1:1000	DAPI	2018-12-24
Fig.2H
KAN421-1	RPE-hTERT	confluent	Fixed in 4% PFA	Myosin Va, sc-365986, Santa Cruz, 1:1000	CEP164, HPA037605, SIGMA, 1:1000	CEP170, Invitrogen, 41-3200, 1:1000		2018-12-17
Fig.2I
KAN649-1	RPE-hTERT	Serum starved for 24 hours.	Fixed in 100% methanol at -20C for 5 minutes.	NCS1, Cell Signaling, 8237P, 1:500	CEP164, sc-515403, Santa Cruz, 1:200	CEP170, Invitrogen, 41-3200, 1:500		2021-05-12
