# Supplementary material for: Myristoylated Neuronal Calcium Sensor-1 captures the preciliary vesicle at distal appendages
Source: eLife. 2025 Jan 30;14:e85998. doi: 10.7554/eLife.85998 (PMC11984960; doi:10.7554/eLife.85998)
Supplement: Figure 2—source data 5. [file elife-85998-fig2-data5.xlsx]

## Sheet: IF condition
Exp. number	Cell line	Culture condition	Fixation condition	anti-rabbit Alexa488	anti-mouse IgG1 Alexa568	anti-mouse IgG2b Alexa647	Nuclear stain	Date	Replicate
KAN417-1	RPE-BFP-Cas9 pMCB306 (pool)		Fixed in MeOH, 24 hour serum starvation	CEP89, 24002-1-AP, Proteintech, 1:500	CEP170, Invitrogen, 41-3200, 1:1000	Ac-Tub, 6B-11, SIGMA, 1:2000	DAPI	2018-12-11	No.1
KAN417-2	RPE-BFP-Cas9 CEP89KO (pool)		Fixed in MeOH, 24 hour serum starvation	CEP89, 24002-1-AP, Proteintech, 1:500	CEP170, Invitrogen, 41-3200, 1:1000	Ac-Tub, 6B-11, SIGMA, 1:2000	DAPI	2018-12-11	No.1
KAN417-3	RPE-BFP-Cas9 NCS1KO (pool)		Fixed in MeOH, 24 hour serum starvation	CEP89, 24002-1-AP, Proteintech, 1:500	CEP170, Invitrogen, 41-3200, 1:1000	Ac-Tub, 6B-11, SIGMA, 1:2000	DAPI	2018-12-11	No.1
KAN417-4	RPE-BFP-Cas9 C3orf14KO (pool)		Fixed in MeOH, 24 hour serum starvation	CEP89, 24002-1-AP, Proteintech, 1:500	CEP170, Invitrogen, 41-3200, 1:1000	Ac-Tub, 6B-11, SIGMA, 1:2000	DAPI	2018-12-11	No.1
