# Supplementary material for: Myristoylated Neuronal Calcium Sensor-1 captures the preciliary vesicle at distal appendages
Source: eLife. 2025 Jan 30;14:e85998. doi: 10.7554/eLife.85998 (PMC11984960; doi:10.7554/eLife.85998)
Supplement: Figure 2—source data 7. [file elife-85998-fig2-data7.xlsx]

## Sheet: IF condition
Exp. number	Cell line	Ectopic expression	Fixation/culturing condition	anti-rabbit Alexa488	anti-mouse IgG1 Alexa568	anti-mouse IgG2b Alexa647	Nuclear stain	Date	Replicate
KAN361-1	RPE-BFP-Cas9pMCB306(pool)	LAPC-C3orf14 (minimal CMV)	Fixed in 4% PFA/serum starvation for 24 hours	chicken anti GFP, Invitrogen, 1:1000	CEP170, Invitrogen, 41-3200, 1:1000	Ac-Tub, 6B-11, SIGMA, 1:2000	DAPI
KAN361-2	RPE-BFP-Cas9 CEP89KO#2 (pool)	LAPC-C3orf14 (minimal CMV)	Fixed in 4% PFA/serum starvation for 24 hours	chicken anti GFP, Invitrogen, 1:1000	CEP170, Invitrogen, 41-3200, 1:1000	Ac-Tub, 6B-11, SIGMA, 1:2000	DAPI
KAN361-5	RPE-BFP-Cas9 NCS1 KO (pool)	LAPC-C3orf14 (minimal CMV)	Fixed in 4% PFA/serum starvation for 24 hours	chicken anti GFP, Invitrogen, 1:1000	CEP170, Invitrogen, 41-3200, 1:1000	Ac-Tub, 6B-11, SIGMA, 1:2000	DAPI
