# Supplementary material for: Myristoylated Neuronal Calcium Sensor-1 captures the preciliary vesicle at distal appendages
Source: eLife. 2025 Jan 30;14:e85998. doi: 10.7554/eLife.85998 (PMC11984960; doi:10.7554/eLife.85998)
Supplement: Figure 3—figure supplement 1—source data 1. [file elife-85998-fig3-figsupp1-data1.xlsx]

## Sheet: Immunofluorescence condition
Exp. number	Cell line	Culture condition, fixation condition	rabbit-Alexa488	mouse IgG1-Alexa568	mouse IgG2b-Alexa647	Nuclear stain	Date	Replicate
KAN423-20	RPE-BFP-Cas9 pMCB306 (pool)	Fixed in 4% PFA, 24 hour serum starvation	ARL13B, Proteintech, 17711-1-AP, 1:1000	CEP170, Invitrogen, 41-3200, 1:1000	Ac-Tub, 6B-11, SIGMA, 1:2000	DAPI	2018-12-19	No.2
KAN423-21	RPE-BFP-Cas9 CEP89KO (pool)	Fixed in 4% PFA, 24 hour serum starvation	ARL13B, Proteintech, 17711-1-AP, 1:1000	CEP170, Invitrogen, 41-3200, 1:1000	Ac-Tub, 6B-11, SIGMA, 1:2000	DAPI	2018-12-19	No.2
KAN423-22	RPE-BFP-Cas9 NCS1KO (pool)	Fixed in 4% PFA, 24 hour serum starvation	ARL13B, Proteintech, 17711-1-AP, 1:1000	CEP170, Invitrogen, 41-3200, 1:1000	Ac-Tub, 6B-11, SIGMA, 1:2000	DAPI	2018-12-19	No.2
KAN423-23	RPE-BFP-Cas9 C3orf14KO (pool)	Fixed in 4% PFA, 24 hour serum starvation	ARL13B, Proteintech, 17711-1-AP, 1:1000	CEP170, Invitrogen, 41-3200, 1:1000	Ac-Tub, 6B-11, SIGMA, 1:2000	DAPI	2018-12-19	No.2

## Sheet: Ciliary length measurement
																																			Average	S.D.
KAN423-20_1.tif	4.339	3.864	2.374	5.466	2.729	3.512	3.997	3.161	2.205	1.998	5.138	4.16	2.687	3.02	2.521	5.135	5.212	2.648
KAN423-20_2.tif	3.589	4.005	3.431	2.04	3.484	4.805	3.191	3.367	4.785	2.127	2.698	3.321	4.795	2.073	1.756	3.369	3.159	3.372	2.071	4.405	4.801	2.646	3.478	3.527	3.851
KAN423-20_3.tif	4.692	3.429	4.312	2.999	2.796	3.508	3.582	3.978	3.782	3.585	3.381	2.291	6.048	1.95	3.847	2.86	2.476	3.956	2.563	3.922	3.441	3.684	5.626	5.766
KAN423-20_4.tif	3.924	5.492	4.753	4.218	5.024	3.768	3.937	2.419	4.468	3.712	7.031	2.678	2.788	4.505	2.632	3.056	5.573	2.602	7.806	5.062	4.424	3.042	2.258	2.792	3.606	3.943
KAN423-20_5.tif	2.009	1.313	2.316	2.719	3.632	4.665	2.854	2.4	1.846	2.797	3.324	4.042	4.023	4.225	7.02	2.519	2.349	3.045	4.307
KAN423-20_6.tif	2.416	3.886	3.444	2.762	4.963	5.119	2.973	2.888	1.487	1.872	1.517	2.978	5.754	3.144	1.674	2.646	1.915	2.731	2.096	4.206	4.061	3.848	3.282	3.759	4.424	3.054	1.617	3.023	4.509	3.066					3.5128	1.18034
KAN423-21_1.tif	2.559	4.578	2.437	3.451	3.679	1.786	2.19	2.974	2.86
KAN423-21_2.tif	3.264	3.804	4.729	4.481	3.077	1.862	2.912	0.837	4.145	4.295	1.745	1.963	3.376	4.388
KAN423-21_3.tif	4.26	5.202	2.6	2.6	2.461	3.902	3.756	2.107	1.588	4.622	2.88	2.406	4.479	4.123	1.27
KAN423-21_4.tif	3.727	3.561	3.282	2.77	1.989	2.213	2.475	3.023	5.042	5.446	3.801	3.462	1.889	2.339	3.095	2.656	1.198	2.72	5.652
KAN423-21_5.tif	1.935	3.376	3.356	3.238	4.305	2.933	3.863	3.05	4.051	5.27	4.657	0.713	1.867	4.157	2.968	2.738
KAN423-21_6.tif	3.822	2.257	4.062	6.787	4.666	3.222	3.009	2.665	3.936	3.638	2.932	1.041	1.365	5.048	1.728																				3.21185	1.18547
KAN423-22_1.tif	2.118	2.075	2.635	5.021	4.077	4.892	1.262	2.471	3.363	3.201	4.797	2.029	1.083
KAN423-22_2.tif	2.769	2.96	3.445	1.065	3.543	3.451	1.562	2.934	1.435	2.723	4.419	3.182	2.127	3.479	1.368	4.939	4.523	1.83	2.809	1.718	4.593
KAN423-22_3.tif	3.583	4.165	5.633	4.346	1.758	5.694	2.541	3.739	2.424	2.684	2.232	1.633
KAN423-22_4.tif	3.423	3.768	2.361	3.586	4.308	2.839	2.256	4.642	4.81	4.561	4.327	2.325
KAN423-22_5.tif	6.141	2.538	2.549	3.079	2.945	4.204	2.688	4.367	5.863	3.497	3.688	4.827	5.275	3.595	4.827	5.496	3.922	4.767	2.018	2.616
KAN423-22_6.tif	4.197	3.851	5.774	4.162	4.571	2.4	4.129	4.383	3.387	3.094	2.929	1.575	3.178	4.554	2.453	3.267	2.172																		3.39488	1.22014
KAN423-23_1.tif	4.354	3.847	4.63	3.948	2.598	3.244	2.005	3.329	3.334	3.666	3.437	3.599	3.632	4.562	2.261	0.945	2.657	2.8	3.509	3.885	2.452	4.655	4.363	2.516	4.381	5.666
KAN423-23_2.tif	1.621	2.02	4.663	4.966	2.593	3.635	5.776	4.198	3.114	4.279	5.629	4.049	4.517	4.78	2.543	3.853	2.826	3.259	1.312	4.234	6.197	2.076	5.385	2.005	1.567	3.03	3.721	3.312	2.858
KAN423-23_3.tif	4.24	3.042	3.005	2.565	2.817	1.957	3.29	3.981	2.303	2.555	2.67	2.863	1.935	4.087	3.403	0.974	4.498	3.534	4.49	3.548	3.183	3.567	5.566	2.025	3.353	3.92	2.735	2.391
KAN423-23_4.tif	1.735	3.52	3.165	1.775	3.884	2.901	4.365	2.809	2.961	2.986	4.397	1.34	3.393	3.117	3.641	4.238	3.324	2.286	3.261	5.142	3.58
KAN423-23_5.tif	3.912	2.896	3.726	3.138	5.027	3.24	3.562	3.066	2.689	3.562	2.899	2.328	3.389	3.402	2.677	4.182	3.271	3.353	3.966	5.291	3.83	2.465	4.496	1.692
KAN423-23_6.tif	3.751	3.932	3.891	2.794	4.225	3.634	1.277	1.49	2.181	3.282	3.061	2.746	3.138	2.511	3.265	4.043	4.518	3.855	4.19	5.393															3.37734	1.03167

## Sheet: Statistics
	Table Analyzed	Data 1						Number of families	1
	Data sets analyzed	A-D						Number of comparisons per family	3
								Alpha	0.05
	ANOVA summary
	F	1.037						Dunnett's multiple comparisons test	Mean Diff.	95.00% CI of diff.	Below threshold?	Summary	Adjusted P Value	A-?
	P value	0.3758						sgGFP vs. CEP89 KO	0.2848	-0.09773 to 0.6672	No	ns	0.1945	B	CEP89 KO
	P value summary	ns						sgGFP vs. NCS1 KO	0.1017	-0.2725 to 0.4760	No	ns	0.8619	C	NCS1 KO
	Significant diff. among means (P < 0.05)?	No						sgGFP vs. C3ORF14 KO	0.1193	-0.2155 to 0.4541	No	ns	0.7407	D	C3ORF14 KO
	R squared	0.006913
								Test details	Mean 1	Mean 2	Mean Diff.	SE of diff.	n1	n2	q	DF
	Brown-Forsythe test							sgGFP vs. CEP89 KO	3.497	3.212	0.2848	0.1619	120	88	1.759	447
	F (DFn, DFd)	2.102 (3, 447)						sgGFP vs. NCS1 KO	3.497	3.395	0.1017	0.1584	120	95	0.642	447
	P value	0.0992						sgGFP vs. C3ORF14 KO	3.497	3.377	0.1193	0.1417	120	148	0.8416	447
	P value summary	ns
	Are SDs significantly different (P < 0.05)?	No
	Bartlett's test
	Bartlett's statistic (corrected)	4.85
	P value	0.1831
	P value summary	ns
	Are SDs significantly different (P < 0.05)?	No
	ANOVA table	SS	DF	MS	F (DFn, DFd)	P value
	Treatment (between columns)	4.142	3	1.381	F (3, 447) = 1.037	P=0.3758
	Residual (within columns)	595	447	1.331
	Total	599.1	450
	Data summary
	Number of treatments (columns)	4
	Number of values (total)	451
