# Supplementary material for: Myristoylated Neuronal Calcium Sensor-1 captures the preciliary vesicle at distal appendages
Source: eLife. 2025 Jan 30;14:e85998. doi: 10.7554/eLife.85998 (PMC11984960; doi:10.7554/eLife.85998)
Supplement: Figure 3—figure supplement 1—source data 2. [file elife-85998-fig3-figsupp1-data2.xlsx]

## Sheet: Replicate1_KAN416
	Label	Area	Mean	Min	Max	X	Y	Circ	IntDen	RawIntDen	AR	Round	Solidity
216	ARL13B_KAN416-22_1.tif:0001-0037	2.34	1428.08	462	3646	75.822	6.052	0.374	3341.9	128527	5.916	0.169	0.807	1.43841
217	ARL13B_KAN416-22_1.tif:0002-0123	1.326	975.843	161	2079	1.614	19.801	0.59	1294.05	49768	2.995	0.334	0.823	0.55698
218	ARL13B_KAN416-22_1.tif:0003-0162	0.754	726.276	446	1331	37.635	26.287	0.401	547.645	21062	5.382	0.186	0.725	0.235716
219	ARL13B_KAN416-22_1.tif:0004-0214	1.846	1176.31	494	2474	79.055	34.547	0.522	2171.6	83518	3.916	0.255	0.776	0.934695
220	ARL13B_KAN416-22_1.tif:0005-0308	1.872	1356.79	159	3810	192.808	49.79	0.588	2540.07	97689	2.47	0.405	0.75	1.09329
221	ARL13B_KAN416-22_1.tif:0006-0344	1.534	989.593	241	1850	8.233	55.419	0.542	1518.13	58386	3.041	0.329	0.771	0.653429
222	ARL13B_KAN416-22_1.tif:0007-0345	1.274	1118.24	321	2831	49.42	55.758	0.587	1424.73	54794	3.131	0.319	0.79	0.613229
223	ARL13B_KAN416-22_1.tif:0008-0457	1.768	1083.84	457	2647	24.432	73.596	0.415	1916.34	73701	5.289	0.189	0.727	0.824827
224	ARL13B_KAN416-22_1.tif:0009-0533	1.248	715.521	454	1207	222.239	86.054	0.247	893.024	34345	8.105	0.123	0.636	0.384373
225	ARL13B_KAN416-22_1.tif:0010-0628	1.664	1033.12	461	1971	136.047	101.411	0.421	1719.22	66120	5.008	0.2	0.731	0.739984
226	ARL13B_KAN416-22_1.tif:0011-0648	2.808	1182.88	450	2553	25.642	104.636	0.346	3321.73	127751	5.5	0.182	0.686	1.42973
227	ARL13B_KAN416-22_1.tif:0012-0653	2.886	1420.87	457	3427	116.759	105.333	0.409	4100.86	157716	5.36	0.187	0.747	1.76508
228	ARL13B_KAN416-22_1.tif:0013-0747	1.898	1130.27	457	2368	84.496	120.433	0.424	2145.39	82510	5.012	0.2	0.705	0.923414
229	ARL13B_KAN416-22_1.tif:0014-0807	2.106	1225.2	454	2806	181.897	130.144	0.414	2580.42	99241	5.189	0.193	0.75	1.11066
230	ARL13B_KAN416-22_1.tif:0015-0911	3.12	1261.25	316	2848	14.351	147.133	0.287	3935.34	151350	5.299	0.189	0.594	1.69384
231	ARL13B_KAN416-22_1.tif:0016-0925	1.976	1252.93	464	2804	171.876	149.224	0.398	2475.95	95223	6.123	0.163	0.745	1.06569
232	ARL13B_KAN416-22_1.tif:0017-1020	2.002	1192.3	264	3024	93.511	164.445	0.478	2387.13	91807	4.257	0.235	0.828	1.02746
233	ARL13B_KAN416-22_2.tif:0001-0095	1.794	1524.3	489	3768	29.886	15.294	0.487	2734.77	105177	4.393	0.228	0.75	1.17709
234	ARL13B_KAN416-22_2.tif:0002-0202	2.106	1681.15	459	3699	128.659	32.625	0.382	3540.71	136173	5.844	0.171	0.698	1.52399
235	ARL13B_KAN416-22_2.tif:0003-0275	1.508	1193.26	485	2407	59.743	44.324	0.462	1799.54	69209	4.133	0.242	0.72	0.774555
236	ARL13B_KAN416-22_2.tif:0004-0294	3.198	1451.5	185	3376	202.017	47.556	0.378	4642.19	178535	5.301	0.189	0.719	1.99808
237	ARL13B_KAN416-22_2.tif:0005-0304	1.196	1221.24	451	2804	155.96	49.101	0.551	1460.69	56177	3.138	0.319	0.754	0.628707
238	ARL13B_KAN416-22_2.tif:0006-0326	2.184	1407.26	471	3496	14.042	52.527	0.349	3073.64	118210	5.717	0.175	0.661	1.32295
239	ARL13B_KAN416-22_2.tif:0007-0399	2.496	1582.92	451	3280	75.122	64.466	0.392	3951.2	151960	5.565	0.18	0.814	1.70067
240	ARL13B_KAN416-22_2.tif:0008-0807	1.924	1002.47	422	2420	169.347	129.822	0.29	1928.87	74183	3.082	0.324	0.51	0.830222
241	ARL13B_KAN416-22_2.tif:0009-0827	2.366	1003.55	450	3054	105.666	133.571	0.319	2374.54	91323	7.103	0.141	0.692	1.02204
242	ARL13B_KAN416-22_2.tif:0010-1027	1.04	808.725	450	1457	96.093	165.624	0.354	841.125	32349	5.352	0.187	0.588	0.362035
243	ARL13B_KAN416-22_3.tif:0001-0012	1.768	916.559	450	1826	64.536	1.771	0.423	1620.57	62326	4.268	0.234	0.723	0.697524
244	ARL13B_KAN416-22_3.tif:0002-0139	1.586	1072.74	462	2751	161.547	22.539	0.401	1701.46	65437	4.918	0.203	0.678	0.732341
245	ARL13B_KAN416-22_3.tif:0003-0172	0.988	657.368	466	864	113.431	27.803	0.349	649.519	24980	5.557	0.18	0.745	0.279565
246	ARL13B_KAN416-22_3.tif:0004-0227	0.546	504.619	380	614	16.605	36.469	0.538	275.539	10597	2.195	0.456	0.667	0.118597
247	ARL13B_KAN416-22_3.tif:0005-0348	1.846	1407.75	336	2767	30.237	56.146	0.57	2598.86	99950	3.548	0.282	0.866	1.11859
248	ARL13B_KAN416-22_3.tif:0006-0410	2.158	1414.36	471	3342	34.901	66.143	0.546	3052.38	117392	2.924	0.342	0.769	1.3138
249	ARL13B_KAN416-22_3.tif:0007-0440	2.938	2076.02	454	3693	184.315	70.986	0.556	6099.71	234590	3.428	0.292	0.825	2.62542
250	ARL13B_KAN416-22_3.tif:0008-0518	1.066	987.439	358	2051	105.22	83.4	0.521	1052.67	40485	2.942	0.34	0.683	0.453089
251	ARL13B_KAN416-22_3.tif:0009-0574	0.91	1052.91	457	1839	146.187	92.629	0.559	958.21	36852	3.193	0.313	0.769	0.41243
252	ARL13B_KAN416-22_3.tif:0010-0749	0.806	782.677	466	1300	162.002	120.831	0.302	630.876	24263	7.826	0.128	0.62	0.27154
253	ARL13B_KAN416-22_3.tif:0011-0808	0.936	504.972	365	718	47.309	130.344	0.447	472.682	18179	3.813	0.262	0.649	0.203451
254	ARL13B_KAN416-22_3.tif:0012-0861	2.366	1109.09	453	2689	74.078	138.757	0.42	2624.26	100927	4.484	0.223	0.662	1.12953
255	ARL13B_KAN416-22_3.tif:0013-0966	1.612	834.871	454	1481	174.579	155.728	0.287	1345.89	51762	8.358	0.12	0.752	0.579296
256	ARL13B_KAN416-22_4.tif:0001-0048	2.47	1252.93	462	2453	171.206	7.629	0.433	3094.91	119028	4.625	0.216	0.731	1.33211
257	ARL13B_KAN416-22_4.tif:0002-0225	2.21	706.2	452	1290	31.985	36.313	0.434	1560.8	60027	5.087	0.197	0.742	0.671794
258	ARL13B_KAN416-22_4.tif:0003-0258	0.988	592.026	450	834	113.537	41.569	0.521	584.957	22497	4.064	0.246	0.776	0.251776
259	ARL13B_KAN416-22_4.tif:0004-0453	2.392	1046.96	450	2188	62.949	73.099	0.427	2504.47	96320	5.024	0.199	0.818	1.07797
260	ARL13B_KAN416-22_4.tif:0005-0772	0.598	749.087	469	1184	51.484	124.446	0.451	447.981	17229	3.631	0.275	0.767	0.192819
261	ARL13B_KAN416-22_4.tif:0006-0778	1.638	1091.59	455	3045	84.443	125.638	0.331	1788.13	68770	5.443	0.184	0.624	0.769642
262	ARL13B_KAN416-22_4.tif:0007-0773	3.276	1424.2	438	3233	144.422	124.609	0.389	4665.95	179449	5.834	0.171	0.834	2.00831
263	ARL13B_KAN416-22_4.tif:0008-0782	1.638	1519.84	462	3219	6.157	126.124	0.54	2489.65	95750	3.728	0.268	0.783	1.07159
264	ARL13B_KAN416-22_4.tif:0009-0793	1.352	584.846	398	1047	52.288	128.259	0.21	790.76	30412	8.792	0.114	0.615	0.340357
265	ARL13B_KAN416-22_4.tif:0010-0850	3.12	1033.21	451	2024	28.221	137.273	0.338	3223.8	123985	6.12	0.163	0.757	1.38758
266	ARL13B_KAN416-22_4.tif:0011-0870	1.378	698.245	452	1772	61.766	140.402	0.235	962.24	37007	8.63	0.116	0.527	0.414165
267	ARL13B_KAN416-22_4.tif:0012-0989	1.378	550.321	71	1074	216.417	159.7	0.481	758.388	29167	3.1	0.323	0.688	0.326424
268	ARL13B_KAN416-22_5.tif:0001-0050	3.068	1548.81	453	3795	216.171	8.173	0.505	4752.05	182760	4.097	0.244	0.787	2.04537
269	ARL13B_KAN416-22_5.tif:0002-0143	2.054	1493.94	453	3369	71.708	23.121	0.422	3068.73	118021	4.797	0.208	0.709	1.32084
270	ARL13B_KAN416-22_5.tif:0003-0205	4.082	966.459	337	2611	159.461	33.211	0.343	3945.32	151734	4.179	0.239	0.597	1.69814
271	ARL13B_KAN416-22_5.tif:0004-0273	1.872	943.528	451	2372	24.293	44.23	0.282	1766.39	67934	7.484	0.134	0.626	0.760286
272	ARL13B_KAN416-22_5.tif:0005-0338	2.184	1647.35	465	3798	44.275	54.627	0.565	3598.02	138377	3.419	0.292	0.82	1.54865
273	ARL13B_KAN416-22_5.tif:0006-0398	2.652	1758.18	457	3823	217.83	64.416	0.431	4662.97	179334	3.571	0.28	0.673	2.00702
274	ARL13B_KAN416-22_5.tif:0007-0403	1.664	1551.02	437	3696	84.442	65.16	0.563	2581.05	99265	2.89	0.346	0.757	1.11093
275	ARL13B_KAN416-22_5.tif:0008-0427	2.262	1081.68	461	2684	151.967	68.944	0.366	2446.9	94106	6.386	0.157	0.696	1.05319
276	ARL13B_KAN416-22_5.tif:0009-0540	2.678	1018.53	299	2558	50.33	87.079	0.308	2727.8	104909	6.349	0.157	0.694	1.17409
277	ARL13B_KAN416-22_5.tif:0010-0564	2.704	945.375	452	2167	185.842	91.012	0.292	2556.45	98319	7.245	0.138	0.644	1.10034
278	ARL13B_KAN416-22_5.tif:0011-0589	2.678	1592.22	452	3800	68.352	94.899	0.319	4264.23	163999	6.834	0.146	0.667	1.8354
279	ARL13B_KAN416-22_5.tif:0012-0620	2.184	1074.64	456	2897	138.903	99.969	0.322	2347.16	90270	7.068	0.141	0.669	1.01026
280	ARL13B_KAN416-22_5.tif:0013-0625	1.404	1189.41	462	3280	221.949	100.957	0.359	1670.03	64228	5.438	0.184	0.663	0.71881
281	ARL13B_KAN416-22_5.tif:0014-0723	2.002	1759.71	401	3856	101.036	116.576	0.533	3523.16	135498	3.828	0.261	0.828	1.51643
282	ARL13B_KAN416-22_5.tif:0015-0728	2.028	1750.09	305	3766	21.868	117.568	0.416	3549.4	136507	4.747	0.211	0.69	1.52772
283	ARL13B_KAN416-22_5.tif:0016-0801	2.21	1414.46	352	3141	148.594	129.253	0.468	3126.14	120229	4.441	0.225	0.783	1.34555
284	ARL13B_KAN416-22_5.tif:0017-0808	1.794	996.681	462	2772	209.131	130.289	0.307	1788.15	68771	6.492	0.154	0.639	0.769653
285	ARL13B_KAN416-22_5.tif:0018-0969	2.548	1270.48	45	3523	187.613	156.424	0.361	3237.38	124507	4.295	0.233	0.641	1.39342
286	ARL13B_KAN416-22_6.tif:0001-0155	2.782	799.056	282	1545	81.031	24.894	0.359	2223.11	85499	6.115	0.164	0.709	0.956865
287	ARL13B_KAN416-22_6.tif:0002-0246	1.82	833.129	451	1866	11.764	39.626	0.263	1516.38	58319	6.816	0.147	0.693	0.652679
288	ARL13B_KAN416-22_6.tif:0003-0412	2.47	1371.98	347	3135	43.396	66.302	0.578	3388.99	130338	2.35	0.426	0.772	1.45868
289	ARL13B_KAN416-22_6.tif:0004-0475	1.768	797.559	459	1584	180.107	76.534	0.301	1410.17	54234	6.625	0.151	0.61	0.606962
290	ARL13B_KAN416-22_6.tif:0005-0548	1.586	1351.7	456	2763	39.804	88.562	0.571	2143.93	82454	2.776	0.36	0.744	0.922787
291	ARL13B_KAN416-22_6.tif:0006-0575	1.898	1038.07	460	1942	67.496	92.89	0.501	1970.37	75779	4.373	0.229	0.807	0.848083
292	ARL13B_KAN416-22_6.tif:0007-0603	1.742	1351.16	461	3822	169.412	97.31	0.585	2353.87	90528	3.713	0.269	0.775	1.01315
293	ARL13B_KAN416-22_6.tif:0008-0692	1.326	834.314	244	2194	42.173	111.583	0.475	1106.37	42550	4.685	0.213	0.803	0.4762
294	ARL13B_KAN416-22_6.tif:0009-0717	3.9	1201.93	415	2938	210.408	115.947	0.237	4687.82	180290	4.6	0.217	0.496	2.01772
295	ARL13B_KAN416-22_6.tif:0010-0820	1.846	823.944	453	1650	111.902	132.29	0.308	1521.09	58500	5.775	0.173	0.651	0.654705
296	ARL13B_KAN416-22_6.tif:0011-0853	1.872	999.333	304	2663	74.898	137.622	0.329	1870.87	71952	6.468	0.155	0.621	0.805253
297	ARL13B_KAN416-22_6.tif:0012-0922	1.664	1178.61	365	2941	39.859	148.718	0.523	1961.32	75431	3.13	0.32	0.74	0.844189
298	ARL13B_KAN416-22_6.tif:0013-1025	0.624	728.833	464	1134	216.666	165.463	0.425	454.819	17492	4.35	0.23	0.658	0.195762
										89353.2				1
299	ARL13B_KAN416-23_1.tif:0001-0023	1.04	1001.9	454	2035	7.905	3.656	0.527	1042.04	40076	3.651	0.274	0.741	0.448512
300	ARL13B_KAN416-23_1.tif:0002-0064	0.676	458.769	393	509	62.211	10.363	0.328	310.147	11928	5.493	0.182	0.542	0.133493
301	ARL13B_KAN416-23_1.tif:0003-0090	1.456	1053.48	453	2338	213.668	14.53	0.474	1533.96	58995	4.335	0.231	0.737	0.660245
302	ARL13B_KAN416-23_1.tif:0004-0112	2.08	1490.83	386	3766	198.922	18.131	0.419	3101.1	119266	5.409	0.185	0.825	1.33477
303	ARL13B_KAN416-23_1.tif:0005-0121	1.69	982.354	451	2280	143.348	19.557	0.337	1660.28	63853	6.526	0.153	0.699	0.714613
304	ARL13B_KAN416-23_1.tif:0006-0193	2.392	1345.92	454	3767	54.087	31.372	0.328	3219.64	123825	5.766	0.173	0.628	1.38579
305	ARL13B_KAN416-23_1.tif:0007-0201	2.028	1468.83	396	3319	31.648	32.372	0.479	2978.97	114569	4.037	0.248	0.75	1.2822
306	ARL13B_KAN416-23_1.tif:0008-0507	2.184	944.083	210	2262	202.733	81.819	0.32	2062	79303	5.207	0.192	0.615	0.887522
307	ARL13B_KAN416-23_1.tif:0009-0569	1.508	890.81	388	1838	119.906	91.885	0.241	1343.42	51667	7.983	0.125	0.571	0.578233
308	ARL13B_KAN416-23_1.tif:0010-0865	1.066	940.293	448	2151	143.825	139.546	0.266	1002.41	38552	7.334	0.136	0.586	0.431456
309	ARL13B_KAN416-23_1.tif:0011-0973	0.962	679.378	452	1103	173.86	156.885	0.591	653.601	25137	3.121	0.32	0.747	0.281322
310	ARL13B_KAN416-23_1.tif:0012-1015	2.99	885.278	453	1791	86.619	163.845	0.155	2647.14	101807	12.363	0.081	0.584	1.13938
311	ARL13B_KAN416-23_2.tif:0001-0008	3.068	745.407	417	1451	128.907	1.341	0.288	2287.05	87958	6.594	0.152	0.648	0.984385
312	ARL13B_KAN416-23_2.tif:0002-0309	1.118	576.465	426	779	94.787	49.989	0.331	644.527	24788	5.659	0.177	0.672	0.277416
313	ARL13B_KAN416-23_2.tif:0003-0431	1.872	741.611	452	1363	129.56	69.526	0.574	1388.38	53396	2.705	0.37	0.702	0.597583
314	ARL13B_KAN416-23_2.tif:0004-0511	2.054	1426.48	312	3756	201.072	82.563	0.523	2930.17	112692	3.767	0.265	0.836	1.2612
315	ARL13B_KAN416-23_2.tif:0005-0539	2.184	702.702	447	1220	71.403	86.833	0.483	1534.79	59027	4.086	0.245	0.724	0.660603
316	ARL13B_KAN416-23_2.tif:0006-0541	1.794	687.043	410	1263	213.167	87.153	0.396	1232.63	47406	4.601	0.217	0.63	0.530546
317	ARL13B_KAN416-23_2.tif:0007-0545	1.378	1297.34	454	3824	113.947	87.898	0.595	1787.84	68759	3.062	0.327	0.791	0.769519
318	ARL13B_KAN416-23_2.tif:0008-0611	0.858	829.939	421	1406	169.877	98.599	0.58	712.131	27388	3.408	0.293	0.767	0.306514
319	ARL13B_KAN416-23_2.tif:0009-0834	1.144	593.205	289	906	69.869	134.519	0.27	678.667	26101	6.347	0.158	0.53	0.29211
320	ARL13B_KAN416-23_2.tif:0010-0861	3.172	1162.01	450	2476	110.169	138.819	0.48	3686.11	141765	3.601	0.278	0.735	1.58657
321	ARL13B_KAN416-23_2.tif:0011-0968	2.08	648.987	456	1118	90.802	156.257	0.403	1349.97	51919	4.369	0.229	0.625	0.581053
322	ARL13B_KAN416-23_3.tif:0001-0152	0.598	541	454	729	164.002	24.457	0.455	323.537	12443	4.303	0.232	0.708	0.139256
323	ARL13B_KAN416-23_3.tif:0002-0265	1.456	734.464	455	1323	97.458	42.763	0.525	1069.44	41130	3.56	0.281	0.762	0.460308
324	ARL13B_KAN416-23_3.tif:0003-0328	2.704	1425.94	459	2761	72.553	53.016	0.531	3855.98	148298	3.319	0.301	0.791	1.65968
325	ARL13B_KAN416-23_3.tif:0004-0436	1.716	1538.76	454	3699	193.209	70.437	0.517	2640.67	101558	3.224	0.31	0.717	1.13659
326	ARL13B_KAN416-23_3.tif:0005-0473	2.366	1023.8	450	2022	54.734	76.377	0.375	2422.46	93166	5.718	0.175	0.743	1.04267
327	ARL13B_KAN416-23_3.tif:0006-0500	1.846	906.944	468	1492	162.041	80.715	0.598	1674.32	64393	3.273	0.306	0.845	0.720657
328	ARL13B_KAN416-23_3.tif:0007-0547	0.858	818.788	450	1654	58.497	88.182	0.56	702.562	27020	2.691	0.372	0.673	0.302395
329	ARL13B_KAN416-23_3.tif:0008-0631	1.586	985.459	247	3102	188.577	101.647	0.457	1563.03	60113	3.825	0.261	0.772	0.672757
330	ARL13B_KAN416-23_3.tif:0009-0647	1.092	1259.12	464	2867	187.495	104.386	0.594	1375.04	52883	2.845	0.352	0.808	0.591842
331	ARL13B_KAN416-23_3.tif:0010-0653	1.898	838.849	324	2082	151.711	105.414	0.473	1592.23	61236	3.714	0.269	0.695	0.685325
332	ARL13B_KAN416-23_3.tif:0011-0676	3.146	1019.18	344	2337	94.769	109.072	0.337	3206.54	123321	7.182	0.139	0.74	1.38015
333	ARL13B_KAN416-23_3.tif:0012-0703	1.534	1006.58	494	1949	131.426	113.42	0.345	1544.18	59388	5.987	0.167	0.682	0.664643
334	ARL13B_KAN416-23_3.tif:0013-0751	1.716	1127.02	456	2583	62.118	121.082	0.459	1934.07	74383	4.32	0.231	0.68	0.83246
335	ARL13B_KAN416-23_3.tif:0014-0915	1.794	969.319	294	2050	153.647	147.463	0.331	1739.06	66883	4.674	0.214	0.608	0.748523
336	ARL13B_KAN416-23_3.tif:0015-1031	2.6	1250.72	450	2940	140.899	166.265	0.593	3252.07	125072	3.213	0.311	0.8	1.39975
337	ARL13B_KAN416-23_4.tif:0001-0185	2.47	836.021	453	2009	174.193	29.783	0.35	2065.1	79422	5.891	0.17	0.681	0.888854
338	ARL13B_KAN416-23_4.tif:0002-0247	1.794	878.826	455	2149	161.548	39.606	0.267	1576.71	60639	6.355	0.157	0.541	0.678644
339	ARL13B_KAN416-23_4.tif:0003-0299	1.534	1012.68	255	2944	68.041	48.365	0.468	1553.54	59748	4.212	0.237	0.728	0.668672
340	ARL13B_KAN416-23_4.tif:0004-0467	1.69	1428.09	400	3799	81.966	75.24	0.522	2413.62	92826	3.859	0.259	0.793	1.03887
341	ARL13B_KAN416-23_4.tif:0005-0466	1.144	773.818	468	1363	64.141	75.132	0.36	885.301	34048	5.87	0.17	0.693	0.381049
342	ARL13B_KAN416-23_4.tif:0006-0498	2.782	1437.13	454	3752	177.844	80.433	0.503	3998.34	153773	3.883	0.258	0.762	1.72096
343	ARL13B_KAN416-23_4.tif:0007-0728	1.326	644.431	373	1096	209.649	117.436	0.297	854.567	32866	8.272	0.121	0.872	0.367821
344	ARL13B_KAN416-23_4.tif:0008-0803	1.04	843.15	450	1423	7.49	129.484	0.541	876.929	33726	4.535	0.22	0.976	0.377446
345	ARL13B_KAN416-23_4.tif:0009-0838	2.47	1232.44	431	3204	180.769	135.166	0.351	3044.32	117082	5.196	0.192	0.64	1.31033
346	ARL13B_KAN416-23_4.tif:0010-0921	1.248	828.604	296	1945	48.835	148.629	0.328	1034.16	39773	4.816	0.208	0.555	0.445121
347	ARL13B_KAN416-23_4.tif:0011-1012	1.248	1025.88	491	1847	197.027	163.118	0.45	1280.37	49242	4.396	0.227	0.75	0.551094
348	ARL13B_KAN416-23_5.tif:0001-0432	1.326	519.451	398	648	141.756	69.665	0.491	688.833	26492	3.985	0.251	0.767	0.296486
349	ARL13B_KAN416-23_5.tif:0002-0521	1.794	686.783	314	1473	131.203	84.146	0.276	1232.16	47388	5.271	0.19	0.556	0.530345
350	ARL13B_KAN416-23_5.tif:0003-0586	0.598	650.391	414	1160	111.918	94.587	0.405	388.957	14959	3.927	0.255	0.73	0.167414
351	ARL13B_KAN416-23_5.tif:0004-1014	1.82	1149.34	247	3070	113.158	163.618	0.343	2091.93	80454	5.695	0.176	0.642	0.900404
352	ARL13B_KAN416-23_6.tif:0001-0057	1.014	1048.23	471	2460	136.271	9.222	0.395	1062.97	40881	5.089	0.196	0.667	0.457521
353	ARL13B_KAN416-23_6.tif:0002-0084	0.754	644.655	404	1018	120.095	13.564	0.401	486.099	18695	5.16	0.194	0.682	0.209226
354	ARL13B_KAN416-23_6.tif:0003-0176	0.91	905.629	455	2063	33.229	28.461	0.487	824.172	31697	3.569	0.28	0.693	0.354738
355	ARL13B_KAN416-23_6.tif:0004-0185	1.04	840.725	450	1356	31.23	29.807	0.589	874.407	33629	3.343	0.299	0.784	0.37636
356	ARL13B_KAN416-23_6.tif:0005-0603	2.106	758.407	335	1840	71.952	97.271	0.262	1597.3	61431	7.575	0.132	0.623	0.687507
357	ARL13B_KAN416-23_6.tif:0006-0608	0.936	735.389	273	1633	102.6	98.053	0.363	688.365	26474	6.111	0.164	0.774	0.296285
358	ARL13B_KAN416-23_6.tif:0007-0861	2.418	992.376	411	2503	60.794	138.898	0.224	2399.71	92291	5.919	0.169	0.521	1.03288
										64483.3				0.721668
359	ARL13B_KAN416-24_1.tif:0001-0259	1.612	954.258	390	2660	8.096	41.694	0.307	1538.36	59164	6.593	0.152	0.646	0.662136
360	ARL13B_KAN416-24_1.tif:0002-0387	1.352	822.692	454	1534	222.078	62.246	0.237	1112.35	42780	6.548	0.153	0.545	0.478774
361	ARL13B_KAN416-24_1.tif:0003-0425	1.508	1095.5	451	2186	139.139	68.631	0.52	1652.11	63539	3.723	0.269	0.768	0.711099
362	ARL13B_KAN416-24_1.tif:0004-0453	1.17	700.978	451	1020	57.475	73.087	0.58	820.193	31544	3.61	0.277	0.818	0.353026
363	ARL13B_KAN416-24_1.tif:0005-0740	1.664	638.969	379	942	73.666	119.423	0.379	1063.31	40894	5.097	0.196	0.656	0.457667
364	ARL13B_KAN416-24_1.tif:0006-0898	1.872	1054.26	431	2816	165.353	144.764	0.353	1973.7	75907	5.605	0.178	0.649	0.849516
365	ARL13B_KAN416-24_1.tif:0007-0915	1.612	1201.14	454	2618	136.623	147.635	0.538	1936.36	74471	3.157	0.317	0.725	0.833445
366	ARL13B_KAN416-24_1.tif:0008-0980	2.756	1046.02	465	2405	55.205	158.078	0.224	2883	110878	9.76	0.102	0.568	1.2409
367	ARL13B_KAN416-24_1.tif:0009-1020	1.222	1018.04	455	2263	130.755	164.538	0.349	1244.12	47848	6.605	0.151	0.644	0.535493
368	ARL13B_KAN416-24_1.tif:0010-1024	1.222	783.851	340	1585	68.533	165.228	0.21	957.924	36841	8.19	0.122	0.577	0.412307
369	ARL13B_KAN416-24_2.tif:0001-0141	1.534	671.898	178	1422	105.549	22.727	0.202	1030.75	39642	7.066	0.142	0.494	0.443655
370	ARL13B_KAN416-24_2.tif:0002-0684	1.846	637.69	344	1162	67.747	110.301	0.205	1177.25	45276	10.649	0.094	0.623	0.506708
371	ARL13B_KAN416-24_2.tif:0003-1032	1.092	754.024	451	1313	34.139	166.56	0.388	823.444	31669	5.27	0.19	0.706	0.354425
372	ARL13B_KAN416-24_3.tif:0001-0108	1.69	930.831	454	1661	35.28	17.61	0.389	1573.2	60504	3.492	0.286	0.628	0.677133
373	ARL13B_KAN416-24_3.tif:0002-0127	0.702	1167.04	457	2771	10.425	20.512	0.544	819.309	31510	2.856	0.35	0.73	0.352645
374	ARL13B_KAN416-24_3.tif:0003-0236	2.288	914.682	454	1820	223.436	38.332	0.282	2092.92	80492	6.607	0.151	0.718	0.900829
375	ARL13B_KAN416-24_3.tif:0004-0248	1.924	1514.32	464	3779	24.244	39.885	0.495	2913.74	112060	4.361	0.229	0.771	1.25412
376	ARL13B_KAN416-24_3.tif:0005-0267	1.17	859.822	454	1504	187.969	43.181	0.29	1006.05	38692	6.154	0.163	0.687	0.433023
377	ARL13B_KAN416-24_3.tif:0006-0370	0.936	726.028	476	1396	208.205	59.779	0.37	679.603	26137	5.976	0.167	0.706	0.292513
378	ARL13B_KAN416-24_3.tif:0007-0497	1.092	770.69	414	1468	210.128	80.291	0.386	841.645	32369	4.667	0.214	0.724	0.362259
379	ARL13B_KAN416-24_3.tif:0008-0560	1.092	739.381	377	1226	156.132	90.296	0.404	807.453	31054	4.738	0.211	0.712	0.347542
380	ARL13B_KAN416-24_3.tif:0009-0655	1.404	842.481	398	1840	108.357	105.613	0.4	1182.91	45494	4.81	0.208	0.684	0.509148
381	ARL13B_KAN416-24_3.tif:0010-0754	1.69	1331.08	463	2733	77.87	121.76	0.391	2249.66	86520	4.277	0.234	0.61	0.968292
382	ARL13B_KAN416-24_3.tif:0011-0773	1.144	966.909	454	2102	190.825	124.613	0.434	1106.21	42544	4.071	0.246	0.715	0.476133
383	ARL13B_KAN416-24_3.tif:0012-0787	0.598	594.522	401	832	189.269	127.047	0.381	355.545	13674	5.158	0.194	0.597	0.153033
384	ARL13B_KAN416-24_3.tif:0013-0810	0.572	549.955	355	862	92.719	130.481	0.371	314.593	12099	4.815	0.208	0.688	0.135406
385	ARL13B_KAN416-24_3.tif:0014-0825	0.624	823.292	349	1853	93.451	133.145	0.517	513.765	19759	3.327	0.301	0.75	0.221134
386	ARL13B_KAN416-24_4.tif:0001-0126	1.222	914.213	454	1923	105.902	20.299	0.476	1117.23	42968	3.894	0.257	0.723	0.480878
387	ARL13B_KAN416-24_4.tif:0002-0181	1.508	844.517	456	1588	43.51	29.264	0.424	1273.61	48982	4.739	0.211	0.707	0.548184
388	ARL13B_KAN416-24_4.tif:0003-0397	2.236	959.267	22	2483	170.901	63.973	0.504	2145.05	82497	2.281	0.438	0.708	0.923268
389	ARL13B_KAN416-24_4.tif:0004-0436	1.976	674.382	422	1043	44.278	70.551	0.422	1332.66	51253	4.938	0.203	0.796	0.5736
390	ARL13B_KAN416-24_4.tif:0005-0433	2.08	1190.74	348	3083	18.104	69.88	0.446	2476.88	95259	4.55	0.22	0.714	1.06609
391	ARL13B_KAN416-24_4.tif:0006-0518	1.378	846.887	452	1502	190.313	83.623	0.423	1167.08	44885	5.112	0.196	0.697	0.502332
392	ARL13B_KAN416-24_4.tif:0007-0531	1.222	825.106	447	1459	215.113	85.505	0.293	1008.34	38780	3.763	0.266	0.505	0.434008
393	ARL13B_KAN416-24_4.tif:0008-0659	1.586	989.902	455	2381	123.921	106.215	0.501	1570.08	60384	4.224	0.237	0.772	0.67579
394	ARL13B_KAN416-24_4.tif:0009-0684	2.34	1632.84	456	3777	61.538	110.34	0.433	3821.09	146956	5.135	0.195	0.763	1.64466
395	ARL13B_KAN416-24_4.tif:0010-0859	0.884	886.676	459	1641	60.858	138.528	0.497	783.869	30147	4.686	0.213	0.81	0.337391
396	ARL13B_KAN416-24_4.tif:0011-0951	2.418	1193.95	259	3630	24.513	153.58	0.388	2887.14	111037	3.932	0.254	0.622	1.24267
397	ARL13B_KAN416-24_5.tif:0001-0111	1.95	680.52	429	1008	136.672	18.05	0.466	1327.09	51039	4.254	0.235	0.794	0.571205
398	ARL13B_KAN416-24_5.tif:0002-0336	0.598	559.435	410	810	26.995	54.219	0.365	334.562	12867	4.498	0.222	0.59	0.144001
399	ARL13B_KAN416-24_5.tif:0003-0415	3.64	1610.29	457	3740	114.47	67.241	0.412	5861.79	225440	4.275	0.234	0.712	2.52302
400	ARL13B_KAN416-24_5.tif:0004-0413	0.91	796.371	451	1830	32.888	66.76	0.503	724.742	27873	3.243	0.308	0.673	0.311942
401	ARL13B_KAN416-24_5.tif:0005-0544	2.652	1254.41	445	2920	141.234	87.839	0.342	3326.9	127950	6.5	0.154	0.703	1.43196
402	ARL13B_KAN416-24_5.tif:0006-0864	0.598	681.522	409	1205	167.409	139.457	0.415	407.575	15675	3.496	0.286	0.639	0.175427
403	ARL13B_KAN416-24_6.tif:0001-0057	1.17	906.733	457	1656	88.345	9.254	0.435	1060.94	40803	4.81	0.208	0.692	0.456648
404	ARL13B_KAN416-24_6.tif:0002-0080	1.768	651.059	255	1505	14.553	13.097	0.239	1151.14	44272	8.863	0.113	0.68	0.495472
405	ARL13B_KAN416-24_6.tif:0003-0429	0.728	582.5	461	905	116.359	69.176	0.331	424.086	16310	5.947	0.168	0.629	0.182534
406	ARL13B_KAN416-24_6.tif:0004-0632	1.092	643.952	433	1283	67.537	101.956	0.188	703.238	27046	10.996	0.091	0.553	0.302686
407	ARL13B_KAN416-24_6.tif:0005-0793	2.262	1329.15	472	2704	133.814	127.861	0.401	3006.72	115636	4.459	0.224	0.649	1.29414
408	ARL13B_KAN416-24_6.tif:0006-0832	2.21	1326.53	312	3100	95.622	134.169	0.502	2931.81	112755	3.996	0.25	0.85	1.2619
										58083.5				0.650044
409	ARL13B_KAN416-25_1.tif:0001-0021	0.91	688.943	450	1005	9.604	3.458	0.484	626.976	24113	4.23	0.236	0.778	0.269862
410	ARL13B_KAN416-25_1.tif:0002-0042	1.664	823.578	456	1784	21.537	6.828	0.25	1370.52	52709	9.227	0.108	0.612	0.589895
411	ARL13B_KAN416-25_1.tif:0003-0045	2.574	1142.03	431	2334	186.236	7.05	0.36	2939.76	113061	5.106	0.196	0.635	1.26533
412	ARL13B_KAN416-25_1.tif:0004-0056	2.08	898.788	465	1552	99.259	9.129	0.331	1869.59	71903	6.563	0.152	0.727	0.804705
413	ARL13B_KAN416-25_1.tif:0005-0192	2.47	1173.6	454	2430	53.354	31.092	0.448	2898.97	111492	4.983	0.201	0.779	1.24777
414	ARL13B_KAN416-25_1.tif:0006-0371	1.924	1082.61	294	2291	125.344	59.832	0.509	2083.06	80113	4.563	0.219	0.881	0.896588
415	ARL13B_KAN416-25_1.tif:0007-0463	1.196	858.457	488	1640	96.221	74.778	0.371	1026.78	39489	6.133	0.163	0.702	0.441943
416	ARL13B_KAN416-25_1.tif:0008-0648	1.872	1304.58	302	2994	70.775	104.506	0.555	2442.33	93930	3.708	0.27	0.828	1.05122
417	ARL13B_KAN416-25_1.tif:0009-0690	1.014	793.051	450	1297	39.182	111.285	0.382	804.202	30929	5.3	0.189	0.69	0.346143
418	ARL13B_KAN416-25_1.tif:0010-0987	1.56	667.483	177	1050	21.594	159.095	0.352	1041.34	40049	4.599	0.217	0.622	0.44821
419	ARL13B_KAN416-25_2.tif:0001-0123	1.898	708.589	461	1075	150.545	19.996	0.478	1344.98	51727	4.036	0.248	0.772	0.578905
420	ARL13B_KAN416-25_2.tif:0002-0125	3.666	1779.57	285	3683	95.615	20.318	0.341	6524.31	250920	6.192	0.161	0.719	2.80818
421	ARL13B_KAN416-25_2.tif:0003-0141	0.884	500.618	409	575	47.55	22.898	0.395	442.573	17021	4.73	0.211	0.687	0.190491
422	ARL13B_KAN416-25_2.tif:0004-0172	2.496	659.656	461	964	196.475	27.74	0.479	1646.6	63327	4.411	0.227	0.793	0.708726
423	ARL13B_KAN416-25_2.tif:0005-0225	3.9	1532.11	310	3597	119.863	36.221	0.56	5975.6	229817	3.591	0.278	0.867	2.57201
424	ARL13B_KAN416-25_2.tif:0006-0365	2.964	600.596	339	905	217.316	59.002	0.361	1780.28	68468	5.799	0.172	0.693	0.766262
425	ARL13B_KAN416-25_2.tif:0007-0477	2.574	1264.04	450	2961	86.035	76.982	0.403	3253.84	125140	4.882	0.205	0.896	1.40051
426	ARL13B_KAN416-25_2.tif:0008-0510	5.044	775.954	453	1431	197.511	82.209	0.332	3914.15	150535	6.449	0.155	0.752	1.68472
427	ARL13B_KAN416-25_2.tif:0009-0565	1.482	1221.44	450	2982	174.559	91.031	0.483	1810.28	69622	4.17	0.24	0.687	0.779177
428	ARL13B_KAN416-25_2.tif:0010-0649	3.666	1117.86	450	2499	50.156	104.638	0.493	4098.31	157618	4.065	0.246	0.781	1.76399
429	ARL13B_KAN416-25_2.tif:0011-0707	2.392	848.837	464	1529	89.699	113.99	0.503	2030.54	78093	4.112	0.243	0.786	0.873981
430	ARL13B_KAN416-25_2.tif:0012-0894	1.56	877.933	452	1616	189.259	144.085	0.588	1369.66	52676	3.004	0.333	0.759	0.589525
431	ARL13B_KAN416-25_2.tif:0013-0975	2.184	1005.57	13	3177	101.453	157.086	0.328	2196.3	84468	5.419	0.185	0.596	0.945327
432	ARL13B_KAN416-25_3.tif:0001-0064	1.846	1006.86	272	2000	162.709	10.364	0.532	1858.77	71487	3.888	0.257	0.845	0.800049
433	ARL13B_KAN416-25_3.tif:0002-0077	1.196	951.37	454	2426	220.509	12.448	0.417	1137.91	43763	4.624	0.216	0.742	0.489775
434	ARL13B_KAN416-25_3.tif:0003-0133	3.77	1015.05	456	2473	113.736	21.877	0.222	3826.99	147183	3.635	0.275	0.438	1.6472
435	ARL13B_KAN416-25_3.tif:0004-0222	1.976	1030.49	459	2243	165.697	35.8	0.374	2036.37	78317	5.413	0.185	0.688	0.876488
436	ARL13B_KAN416-25_3.tif:0005-0283	0.962	900.162	393	1788	215.624	45.64	0.492	866.008	33306	3.709	0.27	0.813	0.372745
437	ARL13B_KAN416-25_3.tif:0006-0284	0.598	819.522	249	1787	219.584	45.82	0.371	490.104	18849	4.768	0.21	0.767	0.210949
438	ARL13B_KAN416-25_3.tif:0007-0327	2.262	1107.31	339	2291	61.018	52.843	0.402	2504.89	96336	6.271	0.159	0.849	1.07815
439	ARL13B_KAN416-25_3.tif:0008-0376	2.444	1632.89	477	3832	116.249	60.772	0.509	3991.03	153492	4.109	0.243	0.777	1.71781
440	ARL13B_KAN416-25_3.tif:0009-0480	2.184	944.881	452	1956	176.519	77.444	0.246	2063.74	79370	9.161	0.109	0.656	0.888272
441	ARL13B_KAN416-25_3.tif:0010-0623	2.678	1429.48	452	3171	167.732	100.724	0.315	3828.37	147236	5.973	0.167	0.654	1.6478
442	ARL13B_KAN416-25_3.tif:0011-0661	1.976	1104.03	458	2236	31.815	106.811	0.295	2181.69	83906	7.199	0.139	0.673	0.939037
443	ARL13B_KAN416-25_3.tif:0012-0921	1.144	797.364	450	1334	33.496	148.398	0.293	912.239	35084	6.341	0.158	0.595	0.392644
444	ARL13B_KAN416-25_3.tif:0013-0927	1.82	995.757	488	2291	141.736	149.483	0.353	1812.39	69703	5.865	0.171	0.704	0.780084
445	ARL13B_KAN416-25_3.tif:0014-0980	2.08	1111.35	484	2471	219.016	158.059	0.371	2311.75	88908	6.046	0.165	0.751	0.995017
446	ARL13B_KAN416-25_3.tif:0015-1034	1.274	1009.45	349	2151	151.346	166.823	0.279	1286.12	49463	4.746	0.211	0.628	0.553567
447	ARL13B_KAN416-25_4.tif:0001-0011	2.002	1455.13	465	3664	39.252	1.846	0.421	2913.34	112045	4.834	0.207	0.71	1.25396
448	ARL13B_KAN416-25_4.tif:0002-0044	1.872	645.069	307	1176	165.142	7.238	0.301	1207.64	46445	4.493	0.223	0.6	0.519791
449	ARL13B_KAN416-25_4.tif:0003-0116	3.536	1912.58	461	3771	30.533	18.95	0.509	6763.29	260111	2.549	0.392	0.696	2.91104
450	ARL13B_KAN416-25_4.tif:0004-0244	4.68	959.383	379	1842	145.078	39.152	0.321	4490.18	172689	6.262	0.16	0.724	1.93266
451	ARL13B_KAN416-25_4.tif:0005-0229	1.3	1112.74	193	2703	16.102	36.884	0.481	1446.65	55637	4.522	0.221	0.826	0.622663
452	ARL13B_KAN416-25_4.tif:0006-0255	3.744	1132.17	267	2675	214.598	41.516	0.36	4239.11	163033	1.909	0.524	0.599	1.82459
453	ARL13B_KAN416-25_4.tif:0007-0258	2.314	1209.63	462	3758	73.285	41.607	0.524	2799.25	107657	3.404	0.294	0.695	1.20485
454	ARL13B_KAN416-25_4.tif:0008-0337	2.262	1650.35	457	3755	2.989	54.346	0.409	3733.3	143580	5.105	0.196	0.722	1.60688
455	ARL13B_KAN416-25_4.tif:0009-0387	2.548	1616.84	477	3573	31.518	62.275	0.476	4119.95	158450	3.375	0.296	0.721	1.7733
456	ARL13B_KAN416-25_4.tif:0010-0389	3.718	723.734	449	1781	81.981	62.802	0.259	2691.01	103494	8.018	0.125	0.586	1.15826
457	ARL13B_KAN416-25_4.tif:0011-0395	2.99	1231.03	456	3633	38.078	63.658	0.512	3680.99	141568	3.801	0.263	0.833	1.58436
458	ARL13B_KAN416-25_4.tif:0012-0451	3.536	1171.45	451	2308	125.895	72.84	0.493	4142.49	159317	4.027	0.248	0.812	1.783
459	ARL13B_KAN416-25_4.tif:0013-0486	2.132	1785.78	469	3799	126.33	78.362	0.506	3807.51	146434	3.957	0.253	0.752	1.63882
460	ARL13B_KAN416-25_4.tif:0014-0506	0.676	1010.08	462	1577	62.745	81.71	0.561	682.853	26262	3.027	0.33	0.743	0.293912
461	ARL13B_KAN416-25_4.tif:0015-0569	3.146	1187.37	461	2641	8.015	91.924	0.473	3735.7	143672	4.696	0.213	0.783	1.60791
462	ARL13B_KAN416-25_4.tif:0016-0593	2.574	1420.4	455	3761	57.104	95.679	0.369	3656.34	140620	5.976	0.167	0.69	1.57375
463	ARL13B_KAN416-25_4.tif:0017-0844	1.586	834.492	459	1473	157.239	136.202	0.537	1323.58	50904	3.795	0.264	0.819	0.569694
464	ARL13B_KAN416-25_4.tif:0018-0880	2.834	1088.89	225	2433	143.793	141.748	0.574	3086.1	118689	3.099	0.323	0.823	1.32831
465	ARL13B_KAN416-25_4.tif:0019-0925	1.768	742.294	359	1300	113.809	149.552	0.32	1312.45	50476	4.942	0.202	0.633	0.564904
466	ARL13B_KAN416-25_4.tif:0020-0930	1.846	1184.48	450	2996	7.285	150.064	0.432	2186.68	84098	5.003	0.2	0.785	0.941186
467	ARL13B_KAN416-25_4.tif:0021-0994	1.924	1055.65	452	2210	48.118	160.32	0.348	2031.19	78118	5.806	0.172	0.649	0.87426
468	ARL13B_KAN416-25_5.tif:0001-0132	2.47	1123.1	451	2638	205.922	21.243	0.316	2774.21	106694	6.237	0.16	0.644	1.19407
469	ARL13B_KAN416-25_5.tif:0002-0182	3.172	683.607	425	1016	95.2	29.374	0.446	2168.53	83400	4.877	0.205	0.847	0.933374
470	ARL13B_KAN416-25_5.tif:0003-0192	1.586	584.377	288	927	36.068	31.104	0.52	926.878	35647	3.566	0.28	0.758	0.398945
471	ARL13B_KAN416-25_5.tif:0004-0284	2.262	1271.37	469	3415	222.683	45.911	0.469	2876.01	110609	3.535	0.283	0.659	1.23788
472	ARL13B_KAN416-25_5.tif:0005-0373	2.886	782.991	455	1485	45.107	60.146	0.536	2259.85	86912	3.959	0.253	0.782	0.972679
473	ARL13B_KAN416-25_5.tif:0006-0454	2.782	842.832	455	1825	15.029	73.157	0.374	2344.9	90183	5.604	0.178	0.688	1.00929
474	ARL13B_KAN416-25_5.tif:0007-0463	3.874	832.403	450	1313	161.708	74.663	0.451	3224.92	124028	4.707	0.212	0.793	1.38806
475	ARL13B_KAN416-25_5.tif:0008-0615	1.404	1128.46	450	2392	3.795	99.211	0.418	1584.46	60937	5.242	0.191	0.711	0.681979
476	ARL13B_KAN416-25_5.tif:0009-0751	2.548	905.551	178	1893	40.528	121.021	0.298	2307.48	88744	4.485	0.223	0.565	0.993182
477	ARL13B_KAN416-25_5.tif:0010-0782	0.936	658.694	466	935	88.486	126.192	0.596	616.575	23713	3.302	0.303	0.828	0.265385
478	ARL13B_KAN416-25_5.tif:0011-0827	2.158	1188.94	190	3817	129.201	133.576	0.516	2565.89	98682	3.861	0.259	0.787	1.1044
479	ARL13B_KAN416-25_5.tif:0012-0874	2.522	933.381	458	2275	115.18	140.942	0.479	2354.13	90538	4.505	0.222	0.732	1.01326
480	ARL13B_KAN416-25_5.tif:0013-0885	3.796	1119.3	452	3402	128.717	142.601	0.377	4249.1	163417	5.397	0.185	0.687	1.82889
481	ARL13B_KAN416-25_5.tif:0014-0983	2.314	917.933	451	2051	57.506	158.586	0.413	2124.22	81696	5.21	0.192	0.767	0.914304
482	ARL13B_KAN416-25_5.tif:0015-0984	3.588	1214.88	348	3457	140.525	158.697	0.334	4359.24	167653	7.134	0.14	0.748	1.87629
483	ARL13B_KAN416-25_5.tif:0016-1026	3.354	1402.18	445	2866	94.954	165.567	0.56	4703.19	180881	3.292	0.304	0.838	2.02434
484	ARL13B_KAN416-25_6.tif:0001-0097	4.368	957.857	452	1873	17.497	15.768	0.383	4184.17	160920	4.88	0.205	0.764	1.80094
485	ARL13B_KAN416-25_6.tif:0002-0163	1.638	1165.24	470	2428	70.913	26.257	0.515	1908.78	73410	3.506	0.285	0.768	0.821571
486	ARL13B_KAN416-25_6.tif:0003-0321	2.574	933.384	458	2197	221.837	51.772	0.332	2402.68	92405	6.794	0.147	0.685	1.03415
487	ARL13B_KAN416-25_6.tif:0004-0362	2.626	1626.51	464	3727	120.059	58.33	0.452	4271.46	164277	4.581	0.218	0.783	1.83851
488	ARL13B_KAN416-25_6.tif:0005-0434	5.2	1337.14	107	3798	183.602	69.858	0.412	6953.57	267429	1.774	0.564	0.639	2.99294
489	ARL13B_KAN416-25_6.tif:0006-0458	2.418	1283.83	242	3686	86.811	74.1	0.294	3104.48	119396	6.537	0.153	0.639	1.33622
490	ARL13B_KAN416-25_6.tif:0007-0479	2.288	1334.65	247	3812	14.069	77.263	0.392	3053.86	117449	5.196	0.192	0.715	1.31443
491	ARL13B_KAN416-25_6.tif:0008-0483	2.236	1183.35	455	3255	17.925	77.904	0.256	2646.13	101768	8.751	0.114	0.575	1.13894
492	ARL13B_KAN416-25_6.tif:0009-0606	0.754	608.586	453	858	222.389	97.798	0.353	458.902	17649	6.046	0.165	0.716	0.197519
493	ARL13B_KAN416-25_6.tif:0010-0630	1.3	986.6	450	1847	1.103	101.617	0.468	1282.66	49330	3.778	0.265	0.781	0.552078
494	ARL13B_KAN416-25_6.tif:0011-0766	3.666	1730.62	222	3571	54.019	123.588	0.46	6344.82	244017	3.084	0.324	0.656	2.73093
495	ARL13B_KAN416-25_6.tif:0012-0810	2.314	939.798	464	1730	192.773	130.468	0.364	2174.82	83642	5.278	0.189	0.704	0.936082
496	ARL13B_KAN416-25_6.tif:0013-0833	2.678	1357.52	456	3590	151.557	134.363	0.495	3635.64	139824	3.41	0.293	0.733	1.56485
497	ARL13B_KAN416-25_6.tif:0014-0861	3.042	1022.67	235	2240	128.368	138.993	0.251	3111.16	119653	6.433	0.155	0.564	1.3391
498	ARL13B_KAN416-25_6.tif:0015-0893	1.976	1305.78	495	2993	22.25	144.087	0.581	2580.37	99239	3.62	0.276	0.822	1.11064
499	ARL13B_KAN416-25_6.tif:0016-0956	2.21	1207.26	455	2715	57.562	154.287	0.449	2668.2	102617	4.555	0.22	0.773	1.14844
500	ARL13B_KAN416-25_6.tif:0017-0964	0.754	870.655	489	1671	155.737	155.381	0.488	656.514	25249	4.185	0.239	0.806	0.282575
										100967				1.12997
501	ARL13B_KAN416-26_1.tif:0001-0112	1.638	1532.6	474	3750	76.989	17.956	0.564	2510.55	96554	3.35	0.299	0.778	1.08059
502	ARL13B_KAN416-26_1.tif:0002-0307	1.456	1016.36	452	2693	31.619	49.599	0.428	1479.9	56916	4.833	0.207	0.696	0.636977
503	ARL13B_KAN416-26_1.tif:0003-0334	3.172	860.361	459	1736	121.548	53.858	0.359	2729.23	104964	5.49	0.182	0.739	1.17471
504	ARL13B_KAN416-26_1.tif:0004-0457	0.572	700.409	334	1481	201.606	73.589	0.484	400.658	15409	3.026	0.33	0.786	0.17245
505	ARL13B_KAN416-26_1.tif:0005-0461	1.014	670.282	451	1385	177.286	74.355	0.365	679.707	26141	5.824	0.172	0.655	0.292558
506	ARL13B_KAN416-26_2.tif:0001-0211	1.768	967.309	426	2194	146.235	34.088	0.389	1710.31	65777	5.441	0.184	0.636	0.736146
507	ARL13B_KAN416-26_2.tif:0002-0241	1.352	820.308	467	1220	216.791	38.964	0.294	1109.12	42656	5.916	0.169	0.605	0.477386
508	ARL13B_KAN416-26_2.tif:0003-0314	1.586	770.869	83	1408	203.036	50.544	0.492	1222.67	47023	2.548	0.392	0.693	0.52626
509	ARL13B_KAN416-26_2.tif:0004-0527	2.47	1296.58	304	3312	170.846	85.012	0.541	3202.74	123175	4.218	0.237	0.876	1.37852
510	ARL13B_KAN416-26_2.tif:0005-0541	2.184	893.19	453	1686	217.945	87.282	0.316	1950.85	75028	6.416	0.156	0.664	0.839679
511	ARL13B_KAN416-26_2.tif:0006-0573	0.832	582.562	450	737	113.787	92.532	0.365	484.721	18642	3.542	0.282	0.566	0.208633
512	ARL13B_KAN416-26_2.tif:0007-0875	1.456	1033.86	463	2075	200.958	141.14	0.452	1505.39	57896	4.285	0.233	0.683	0.647945
513	ARL13B_KAN416-26_2.tif:0008-0940	1.066	730.78	226	1453	23.143	151.978	0.239	779.059	29962	4.276	0.234	0.443	0.335321
514	ARL13B_KAN416-26_3.tif:0001-0196	0.884	634.676	192	1121	152.965	31.852	0.221	561.088	21579	6.246	0.16	0.456	0.241502
515	ARL13B_KAN416-26_3.tif:0002-0317	2.652	908.304	408	1632	95.972	51.236	0.478	2408.97	92647	4.587	0.218	0.823	1.03686
516	ARL13B_KAN416-26_3.tif:0003-0384	1.456	1084.75	462	2162	172.008	61.998	0.414	1579.49	60746	5.107	0.196	0.747	0.679841
517	ARL13B_KAN416-26_3.tif:0004-0404	2.184	1624.01	279	3783	118.88	65.364	0.422	3547.06	136417	4.18	0.239	0.721	1.52672
518	ARL13B_KAN416-26_3.tif:0005-0426	1.586	823.902	460	1644	71.536	68.567	0.269	1306.79	50258	7.083	0.141	0.557	0.562464
519	ARL13B_KAN416-26_3.tif:0006-0779	1.118	772.884	451	1273	76.779	125.837	0.286	864.136	33234	6.826	0.146	0.558	0.37194
520	ARL13B_KAN416-26_3.tif:0007-0842	1.716	872.106	190	2344	211.186	135.802	0.4	1496.62	57559	5.355	0.187	0.781	0.644174
521	ARL13B_KAN416-26_3.tif:0008-0853	1.794	1296.64	284	3570	35.404	137.611	0.44	2326.31	89468	4.835	0.207	0.758	1.00128
522	ARL13B_KAN416-26_3.tif:0009-0911	2.444	966.34	193	2079	135.181	146.731	0.354	2361.88	90836	5.828	0.172	0.758	1.01659
523	ARL13B_KAN416-26_3.tif:0010-1029	0.936	861.583	465	1715	152.48	165.729	0.279	806.491	31017	6.132	0.163	0.571	0.347128
524	ARL13B_KAN416-26_3.tif:0011-1028	1.352	706	298	1300	186.78	165.889	0.226	954.569	36712	9.941	0.101	0.584	0.410864
525	ARL13B_KAN416-26_4.tif:0001-0095	1.898	847.616	459	1675	187.822	15.402	0.241	1608.87	61876	6.932	0.144	0.527	0.692487
526	ARL13B_KAN416-26_4.tif:0002-0161	1.482	695.632	317	1272	36.571	26.025	0.463	1030.99	39651	5.026	0.199	0.891	0.443756
527	ARL13B_KAN416-26_4.tif:0003-0173	2.132	1426.45	452	3336	59.657	27.881	0.38	3041.38	116969	5.735	0.174	0.739	1.30906
528	ARL13B_KAN416-26_4.tif:0004-0221	1.586	670.787	202	1384	91.705	35.278	0.192	1063.93	40918	7.392	0.135	0.486	0.457935
529	ARL13B_KAN416-26_4.tif:0005-0264	1.768	1136.34	451	2190	220.78	42.596	0.443	2009.17	77271	4.675	0.214	0.72	0.864781
530	ARL13B_KAN416-26_4.tif:0006-0287	1.924	966.662	364	2326	15.452	46.577	0.389	1859.97	71533	4.481	0.223	0.652	0.800564
531	ARL13B_KAN416-26_4.tif:0007-0419	1.768	817.5	321	1528	22.331	67.514	0.273	1445.43	55590	7.217	0.139	0.602	0.622137
532	ARL13B_KAN416-26_4.tif:0008-0541	1.248	723.208	454	1464	222.864	87.25	0.283	902.618	34714	8.082	0.124	0.623	0.388503
533	ARL13B_KAN416-26_4.tif:0009-0538	0.598	727.87	437	1199	95.52	86.868	0.313	435.292	16741	5.29	0.189	0.613	0.187358
534	ARL13B_KAN416-26_4.tif:0010-0982	1.144	648.205	459	1126	191.151	158.45	0.282	741.591	28521	6.413	0.156	0.62	0.319194
535	ARL13B_KAN416-26_4.tif:0011-1007	0.52	570.85	402	820	97.193	162.621	0.346	296.86	11417	4.485	0.223	0.556	0.127774
536	ARL13B_KAN416-26_5.tif:0001-0025	0.702	959.852	458	1848	97.715	4.249	0.506	673.857	25916	3.401	0.294	0.806	0.29004
537	ARL13B_KAN416-26_5.tif:0002-0200	1.352	583.25	364	986	55.216	32.132	0.283	788.601	30329	7.207	0.139	0.588	0.339428
538	ARL13B_KAN416-26_5.tif:0003-0297	2.132	717.183	320	1374	47.459	48.076	0.274	1529.13	58809	5.337	0.187	0.514	0.658163
539	ARL13B_KAN416-26_5.tif:0004-0331	1.768	745.279	351	1317	121.647	53.514	0.587	1317.73	50679	3.881	0.258	0.895	0.567176
540	ARL13B_KAN416-26_5.tif:0005-0355	1.04	820.875	420	1659	214.555	57.272	0.566	853.761	32835	2.953	0.339	0.734	0.367474
541	ARL13B_KAN416-26_5.tif:0006-0444	1.846	777.423	466	1552	75.148	71.617	0.418	1435.21	55197	4.835	0.207	0.693	0.617739
542	ARL13B_KAN416-26_5.tif:0007-0494	2.678	674.932	271	1537	13.613	79.719	0.241	1807.58	69518	9.025	0.111	0.63	0.778013
543	ARL13B_KAN416-26_5.tif:0008-0630	1.118	706.558	407	1225	157.524	101.481	0.464	789.98	30382	4.334	0.231	0.748	0.340021
544	ARL13B_KAN416-26_5.tif:0009-0672	2.002	1185.16	225	2799	31.763	108.38	0.497	2372.82	91257	4.537	0.22	0.885	1.02131
545	ARL13B_KAN416-26_5.tif:0010-0722	1.586	899.115	231	2438	199.388	116.675	0.496	1426.08	54846	4.167	0.24	0.841	0.613811
546	ARL13B_KAN416-26_5.tif:0011-0963	1.326	802.078	254	1554	49.192	155.222	0.417	1063.62	40906	4.996	0.2	0.703	0.457801
547	ARL13B_KAN416-26_6.tif:0001-0051	1.482	1185.07	357	2948	81.249	8.307	0.527	1756.38	67549	3.533	0.283	0.717	0.755977
548	ARL13B_KAN416-26_6.tif:0002-0248	2.08	1183.19	452	2410	213.275	40.097	0.489	2461.18	94655	4.443	0.225	0.796	1.05933
549	ARL13B_KAN416-26_6.tif:0003-0342	1.3	719.46	189	1470	193.439	55.222	0.34	935.354	35973	6.266	0.16	0.685	0.402593
550	ARL13B_KAN416-26_6.tif:0004-0467	1.352	885.692	122	1908	15.344	75.459	0.553	1197.53	46056	2.404	0.416	0.759	0.515437
551	ARL13B_KAN416-26_6.tif:0005-0594	2.34	811.222	454	2053	50.645	95.802	0.425	1898.37	73010	5.009	0.2	0.706	0.817094
552	ARL13B_KAN416-26_6.tif:0006-0615	1.118	639.86	450	1164	196.723	99.197	0.238	715.407	27514	8.228	0.122	0.573	0.307924
553	ARL13B_KAN416-26_6.tif:0007-0979	2.34	928.444	294	2576	128.188	158.011	0.346	2172.69	83560	6.322	0.158	0.711	0.935165
										56317.1				0.630275
554	ARL13B_KAN416-27_1.tif:0001-0024	0.832	633.969	454	1123	67.937	3.875	0.326	527.494	20287	6.253	0.16	0.593	0.227043
555	ARL13B_KAN416-27_1.tif:0002-0140	1.326	642.961	476	933	129.552	22.586	0.585	852.617	32791	3.675	0.272	0.767	0.366982
556	ARL13B_KAN416-27_1.tif:0003-0165	2.444	1827.16	452	3686	79.781	26.61	0.53	4465.85	171753	3.536	0.283	0.814	1.92218
557	ARL13B_KAN416-27_1.tif:0004-0207	3.068	1233.57	450	2506	106.745	33.407	0.519	3784.81	145561	3.69	0.271	0.805	1.62905
558	ARL13B_KAN416-27_1.tif:0005-0351	3.224	1122.06	450	2993	133.454	56.755	0.394	3617.73	139135	5.839	0.171	0.761	1.55713
559	ARL13B_KAN416-27_1.tif:0006-0361	4.394	1136.31	452	2133	64.289	58.218	0.471	4993.24	192036	4.656	0.215	0.822	2.14918
560	ARL13B_KAN416-27_1.tif:0007-0396	1.586	1252.57	454	2402	108.975	63.862	0.516	1986.7	76407	3.721	0.269	0.758	0.855112
561	ARL13B_KAN416-27_1.tif:0008-0466	2.418	1353.77	352	3718	221.532	75.208	0.517	3273.62	125901	3.999	0.25	0.812	1.40903
562	ARL13B_KAN416-27_1.tif:0009-0475	0.546	678.143	476	982	176.834	76.521	0.527	370.288	14241	3.896	0.257	0.724	0.159379
563	ARL13B_KAN416-27_1.tif:0010-0618	2.6	751.24	450	1502	84.784	99.857	0.355	1953.34	75124	5.616	0.178	0.633	0.840753
564	ARL13B_KAN416-27_1.tif:0011-0768	2.288	832.023	328	1599	161.818	124.01	0.332	1903.78	73218	3.843	0.26	0.573	0.819422
565	ARL13B_KAN416-27_1.tif:0012-0830	3.12	1083.78	363	3031	56.972	133.829	0.446	3381.58	130053	5.103	0.196	0.839	1.45549
566	ARL13B_KAN416-27_1.tif:0013-0840	1.378	1337.21	465	2545	118.155	135.525	0.466	1842.78	70872	4.499	0.222	0.797	0.793167
567	ARL13B_KAN416-27_1.tif:0014-0922	1.794	1504	481	3357	216.123	148.58	0.567	2698.34	103776	3.445	0.29	0.807	1.16141
568	ARL13B_KAN416-27_2.tif:0001-0174	3.77	1341.82	458	2924	149.163	28.16	0.371	5058.97	194564	5.831	0.172	0.784	2.17747
569	ARL13B_KAN416-27_2.tif:0002-0246	2.626	1058.11	417	2579	120.279	39.772	0.321	2778.76	106869	6.393	0.156	0.631	1.19603
570	ARL13B_KAN416-27_2.tif:0003-0336	2.47	1122.61	456	2326	190.318	54.186	0.566	2773.01	106648	3.525	0.284	0.779	1.19355
571	ARL13B_KAN416-27_2.tif:0004-0390	1.768	986.735	376	2265	216.362	63.065	0.495	1744.65	67098	3.93	0.254	0.756	0.75093
572	ARL13B_KAN416-27_2.tif:0005-0423	2.548	816.908	458	1414	23.031	68.163	0.36	2081.61	80057	2.989	0.335	0.555	0.895961
573	ARL13B_KAN416-27_2.tif:0006-0418	1.222	622.106	431	840	64.677	67.442	0.325	760.26	29239	6.132	0.163	0.623	0.327229
574	ARL13B_KAN416-27_2.tif:0007-0471	1.196	967.609	455	2331	220.113	75.83	0.299	1157.33	44510	5.912	0.169	0.687	0.498135
575	ARL13B_KAN416-27_2.tif:0008-0504	1.17	724.8	456	1265	193.857	81.121	0.256	848.067	32616	7.74	0.129	0.643	0.365023
576	ARL13B_KAN416-27_2.tif:0009-0518	1.222	734.511	260	1464	7.635	83.512	0.389	897.626	34522	5.823	0.172	0.676	0.386354
577	ARL13B_KAN416-27_2.tif:0010-0520	1.144	495.045	198	848	212.582	83.861	0.138	566.366	21782	13.665	0.073	0.489	0.243774
578	ARL13B_KAN416-27_2.tif:0011-0558	1.404	959.241	459	2141	126.435	89.995	0.333	1346.86	51799	6.184	0.162	0.675	0.57971
579	ARL13B_KAN416-27_2.tif:0012-0593	2.132	1888.69	472	3714	185.424	95.824	0.561	4026.94	154873	3.202	0.312	0.766	1.73327
580	ARL13B_KAN416-27_2.tif:0013-0645	1.924	1052.65	482	2596	126.285	104.039	0.436	2025.42	77896	5.222	0.192	0.718	0.871776
581	ARL13B_KAN416-27_2.tif:0014-0674	2.028	1140.19	464	2486	66.966	108.68	0.36	2312.45	88935	4.563	0.219	0.642	0.995319
582	ARL13B_KAN416-27_2.tif:0015-0720	2.132	1462.6	458	3150	26.551	116.261	0.51	3118.45	119933	4.118	0.243	0.82	1.34223
583	ARL13B_KAN416-27_2.tif:0016-0738	2.21	808.612	450	1566	178.966	119.199	0.499	1787.14	68732	3.692	0.271	0.787	0.769217
584	ARL13B_KAN416-27_2.tif:0017-0777	2.34	946.544	460	2177	218.664	125.332	0.369	2215.05	85189	4.93	0.203	0.684	0.953396
585	ARL13B_KAN416-27_2.tif:0018-0863	1.352	832.25	442	1863	65.678	139.156	0.356	1125.27	43277	4.886	0.205	0.623	0.484336
586	ARL13B_KAN416-27_2.tif:0019-0937	2.106	1226.11	453	3072	145.287	151.116	0.374	2582.35	99315	5.892	0.17	0.723	1.11149
587	ARL13B_KAN416-27_2.tif:0020-0955	2.834	876.679	451	1822	160.52	153.91	0.197	2484.66	95558	9.078	0.11	0.525	1.06944
588	ARL13B_KAN416-27_2.tif:0021-1023	1.664	781.891	314	1403	19.683	165.123	0.301	1301.14	50041	6.283	0.159	0.637	0.560036
589	ARL13B_KAN416-27_3.tif:0001-0063	0.728	556.893	130	1096	176.678	10.153	0.472	405.442	15593	4.389	0.228	0.789	0.17451
590	ARL13B_KAN416-27_3.tif:0002-0235	0.676	617.115	436	956	140.033	37.912	0.25	417.195	16045	6.714	0.149	0.584	0.179568
591	ARL13B_KAN416-27_3.tif:0003-0436	1.456	924.429	439	1797	157.409	70.371	0.56	1346.05	51768	2.778	0.36	0.742	0.579363
592	ARL13B_KAN416-27_3.tif:0004-0465	2.782	894.935	175	2182	67.623	75.11	0.307	2489.86	95758	8.073	0.124	0.801	1.07168
593	ARL13B_KAN416-27_3.tif:0005-0575	3.484	1258.06	343	2937	218.97	92.891	0.355	4383.34	168580	5.059	0.198	0.693	1.88667
594	ARL13B_KAN416-27_3.tif:0006-0642	1.794	693.464	303	1305	32.908	103.671	0.554	1244.15	47849	3.907	0.256	0.89	0.535504
595	ARL13B_KAN416-27_3.tif:0007-0657	2.236	1306.45	453	2859	122.734	105.938	0.344	2921.41	112355	5.639	0.177	0.685	1.25743
596	ARL13B_KAN416-27_3.tif:0008-0679	1.846	587.338	443	869	85.361	109.39	0.244	1084.29	41701	8.174	0.122	0.631	0.466698
597	ARL13B_KAN416-27_3.tif:0009-0686	2.47	1004.45	317	2608	170.816	110.681	0.275	2481.15	95423	7.415	0.135	0.594	1.06793
598	ARL13B_KAN416-27_3.tif:0010-0694	4.212	896.414	451	1682	37.537	111.814	0.399	3775.92	145219	5.473	0.183	0.755	1.62522
599	ARL13B_KAN416-27_3.tif:0011-0770	2.054	994.924	237	2450	158.716	124.072	0.299	2043.7	78599	4.183	0.239	0.53	0.879644
600	ARL13B_KAN416-27_3.tif:0012-0811	1.794	916.145	461	1811	206.803	130.913	0.547	1643.66	63214	3.416	0.293	0.847	0.707462
601	ARL13B_KAN416-27_3.tif:0013-0993	2.47	1358.56	465	3700	220.565	159.857	0.327	3355.84	129063	6.18	0.162	0.714	1.44441
602	ARL13B_KAN416-27_4.tif:0001-0033	1.794	725.449	451	1550	213.725	5.304	0.29	1301.53	50056	6.46	0.155	0.57	0.560204
603	ARL13B_KAN416-27_4.tif:0002-0063	0.676	777.615	452	1269	35.09	10.159	0.491	525.7	20218	3.878	0.258	0.684	0.22627
604	ARL13B_KAN416-27_4.tif:0003-0144	1.482	814.807	244	1903	90.482	23.216	0.283	1207.62	46444	6.398	0.156	0.559	0.51978
605	ARL13B_KAN416-27_4.tif:0004-0224	2.002	1169.35	247	2632	102.079	36.132	0.533	2341.18	90040	2.709	0.369	0.726	1.00769
606	ARL13B_KAN416-27_4.tif:0005-0226	1.924	870.216	306	1740	174.869	36.381	0.328	1674.4	64396	5.25	0.19	0.661	0.72069
607	ARL13B_KAN416-27_4.tif:0006-0238	2.548	1226.09	464	3819	154.153	38.565	0.287	3124.27	120157	6.537	0.153	0.576	1.34474
608	ARL13B_KAN416-27_4.tif:0007-0333	1.846	1313.15	463	3028	117.536	53.775	0.559	2424.23	93234	3.474	0.288	0.755	1.04343
609	ARL13B_KAN416-27_4.tif:0008-0375	0.728	600.036	455	888	131.315	60.653	0.284	436.852	16801	6.383	0.157	0.636	0.188029
610	ARL13B_KAN416-27_4.tif:0009-0426	2.522	1125.02	454	2767	160.968	68.88	0.442	2837.47	109127	3.466	0.288	0.667	1.2213
611	ARL13B_KAN416-27_4.tif:0010-0431	1.638	747.952	468	1428	53.483	69.518	0.244	1225.22	47121	8.886	0.113	0.573	0.527356
612	ARL13B_KAN416-27_4.tif:0011-0512	2.574	1298.4	455	2991	26.636	82.706	0.32	3342.29	128542	7.41	0.135	0.744	1.43858
613	ARL13B_KAN416-27_4.tif:0012-0718	2.704	711.5	425	1651	22.791	116.219	0.35	1924.01	73996	4.935	0.203	0.715	0.828129
614	ARL13B_KAN416-27_4.tif:0013-0746	1.3	695.78	469	1007	178.326	120.328	0.497	904.568	34789	3.97	0.252	0.775	0.389342
615	ARL13B_KAN416-27_4.tif:0014-0892	1.118	976.86	454	1747	64.926	143.799	0.427	1092.2	42005	4.29	0.233	0.699	0.4701
616	ARL13B_KAN416-27_4.tif:0015-0931	1.872	796.681	460	1537	41.806	150.2	0.343	1491.48	57361	6.27	0.159	0.67	0.641958
617	ARL13B_KAN416-27_5.tif:0001-0010	1.508	799.672	281	1397	196.636	1.635	0.577	1205.98	46381	2.834	0.353	0.789	0.519075
618	ARL13B_KAN416-27_5.tif:0002-0023	1.612	863.79	469	1747	218.187	3.652	0.431	1392.51	53555	4.959	0.202	0.721	0.599363
619	ARL13B_KAN416-27_5.tif:0003-0098	0.676	575.885	376	1009	196.669	15.933	0.491	389.321	14973	3.246	0.308	0.627	0.167571
620	ARL13B_KAN416-27_5.tif:0004-0154	2.236	952.035	452	1839	203.655	24.703	0.289	2128.88	81875	6.043	0.165	0.599	0.916307
621	ARL13B_KAN416-27_5.tif:0005-0235	2.548	1067	461	2876	88.518	38.103	0.278	2718.88	104566	8.225	0.122	0.624	1.17025
622	ARL13B_KAN416-27_5.tif:0006-0464	2.106	1253.26	451	2975	165.589	74.859	0.296	2639.52	101514	7.264	0.138	0.63	1.1361
623	ARL13B_KAN416-27_5.tif:0007-0494	2.314	953.236	452	2321	69.233	79.653	0.295	2205.92	84838	7.222	0.138	0.638	0.949468
624	ARL13B_KAN416-27_5.tif:0008-0557	2.392	1354.42	385	3352	57.142	89.958	0.346	3239.98	124607	5.206	0.192	0.684	1.39454
625	ARL13B_KAN416-27_5.tif:0009-0588	0.91	659.6	450	944	145.924	94.822	0.583	600.272	23086	2.781	0.36	0.693	0.258368
626	ARL13B_KAN416-27_5.tif:0010-0642	1.95	899.333	453	2919	93.694	103.291	0.268	1753.81	67450	5.653	0.177	0.532	0.754869
627	ARL13B_KAN416-27_5.tif:0011-0907	2.288	1612.72	450	3828	197.357	146.307	0.454	3690.12	141919	4.528	0.221	0.762	1.58829
628	ARL13B_KAN416-27_5.tif:0012-1000	1.43	635.764	83	1255	100.196	161.328	0.475	909.197	34967	4.335	0.231	0.809	0.391334
629	ARL13B_KAN416-27_5.tif:0013-0998	0.832	557.656	327	964	75.566	160.882	0.37	463.998	17845	4.94	0.202	0.571	0.199713
630	ARL13B_KAN416-27_6.tif:0001-0027	1.742	1048.27	467	1991	80.537	4.581	0.466	1826.19	70234	4.207	0.238	0.736	0.786026
631	ARL13B_KAN416-27_6.tif:0002-0070	1.04	719.7	486	1128	17.617	11.324	0.398	748.533	28788	5.412	0.185	0.69	0.322182
632	ARL13B_KAN416-27_6.tif:0003-0163	2.314	1250.3	444	2468	33.316	26.477	0.436	2893.38	111277	4.583	0.218	0.745	1.24536
633	ARL13B_KAN416-27_6.tif:0004-0221	1.794	736.725	418	1513	45.598	35.649	0.263	1321.76	50834	8.477	0.118	0.63	0.568911
634	ARL13B_KAN416-27_6.tif:0005-0236	2.054	973.089	177	2786	6.31	38.109	0.538	1998.84	76874	3.88	0.258	0.827	0.860338
635	ARL13B_KAN416-27_6.tif:0006-0252	0.988	801.789	450	1522	205.666	40.83	0.316	792.216	30468	6.549	0.153	0.613	0.340984
636	ARL13B_KAN416-27_6.tif:0007-0289	0.858	700.545	130	1397	40.168	46.433	0.408	601.104	23118	4.798	0.208	0.75	0.258726
637	ARL13B_KAN416-27_6.tif:0008-0304	4.134	1272.5	168	2977	145.757	49.205	0.251	5260.82	202327	7.801	0.128	0.585	2.26435
638	ARL13B_KAN416-27_6.tif:0009-0467	2.08	930.112	457	1819	16.169	75.409	0.374	1934.75	74409	6.042	0.166	0.708	0.832751
639	ARL13B_KAN416-27_6.tif:0010-0500	0.754	958.207	482	1662	17.106	80.711	0.584	722.532	27788	2.848	0.351	0.753	0.31099
640	ARL13B_KAN416-27_6.tif:0011-0516	1.248	771.417	274	1737	36.553	83.168	0.349	962.786	37028	5.93	0.169	0.671	0.4144
641	ARL13B_KAN416-27_6.tif:0012-0548	2.47	1587.33	457	3652	146.08	88.385	0.353	3920.93	150796	6.254	0.16	0.751	1.68764
642	ARL13B_KAN416-27_6.tif:0013-0552	2.99	1716.34	460	3872	89.364	88.984	0.348	5132.16	197379	6.217	0.161	0.701	2.20897
643	ARL13B_KAN416-27_6.tif:0014-0598	0.806	845.161	493	1646	59.4	96.56	0.278	681.241	26200	6.579	0.152	0.539	0.293218
644	ARL13B_KAN416-27_6.tif:0015-0791	0.728	531.464	450	645	221.892	127.583	0.529	386.929	14881	3.321	0.301	0.709	0.166541
645	ARL13B_KAN416-27_6.tif:0016-0826	1.976	1814.92	469	3809	111.159	133.118	0.462	3586.5	137934	3.609	0.277	0.694	1.54369
646	ARL13B_KAN416-27_6.tif:0017-0832	0.936	799.139	463	1216	3.601	134.272	0.355	748.039	28769	6.353	0.157	0.655	0.321969
647	ARL13B_KAN416-27_6.tif:0018-0935	1.742	1473.03	476	3031	137.639	150.842	0.519	2566.17	98693	3.893	0.257	0.749	1.10453
										78355.7				0.876921
648	ARL13B_KAN416-28_1.tif:0001-0135	1.872	774.5	338	1666	146.854	21.874	0.313	1449.95	55764	7.118	0.14	0.702	0.624085
649	ARL13B_KAN416-28_1.tif:0002-0261	1.638	1220.9	462	3112	96.434	42.177	0.518	1999.96	76917	3.303	0.303	0.712	0.860819
650	ARL13B_KAN416-28_1.tif:0003-0459	0.598	612.348	450	894	30.886	74.186	0.486	366.206	14084	4.003	0.25	0.742	0.157622
651	ARL13B_KAN416-28_1.tif:0004-0523	0.702	660.815	417	1045	1.227	84.504	0.256	463.92	17842	5.5	0.182	0.482	0.199679
652	ARL13B_KAN416-28_1.tif:0005-0541	1.586	1239.93	464	3655	117.724	87.33	0.293	1966.65	75636	5.447	0.184	0.533	0.846483
653	ARL13B_KAN416-28_1.tif:0006-0695	1.872	1161.47	452	2829	31.336	112.04	0.567	2174.41	83626	3.633	0.275	0.791	0.935903
654	ARL13B_KAN416-28_1.tif:0007-0716	1.924	1074.04	452	2226	71.432	115.374	0.535	2066.58	79479	3.382	0.296	0.744	0.889492
655	ARL13B_KAN416-28_1.tif:0008-0982	1.716	779.879	436	1886	83.198	158.323	0.259	1338.35	51472	6.078	0.165	0.579	0.576051
656	ARL13B_KAN416-28_2.tif:0001-0156	1.976	1361.64	310	3661	202.343	25.234	0.556	2690.77	103485	3.263	0.306	0.756	1.15816
657	ARL13B_KAN416-28_2.tif:0002-0280	0.754	814.483	457	1324	80.533	45.27	0.35	614.157	23620	5.692	0.176	0.617	0.264344
658	ARL13B_KAN416-28_2.tif:0003-0357	1.534	1342.32	345	3839	53.383	57.527	0.314	2059.25	79197	6.391	0.156	0.596	0.886336
659	ARL13B_KAN416-28_2.tif:0004-0440	2.756	1095.83	365	2868	38.326	70.979	0.343	3020.29	116158	6.167	0.162	0.707	1.29999
660	ARL13B_KAN416-28_2.tif:0005-0503	2.288	1247.32	450	2751	23.645	81.006	0.425	2854.04	109764	4.117	0.243	0.685	1.22843
661	ARL13B_KAN416-28_2.tif:0006-0565	1.066	888.976	455	1622	90.145	91.092	0.502	947.705	36448	3.841	0.26	0.672	0.407909
662	ARL13B_KAN416-28_2.tif:0007-0615	2.106	980.79	455	2176	39.123	99.192	0.478	2065.67	79444	4.711	0.212	0.895	0.8891
663	ARL13B_KAN416-28_2.tif:0008-0687	1.742	716.597	282	1400	29.137	110.831	0.172	1248.39	48012	13.179	0.076	0.573	0.537328
664	ARL13B_KAN416-28_2.tif:0009-0859	2.964	1048	77	2991	118.159	138.659	0.279	3106.46	119472	6.256	0.16	0.623	1.33708
665	ARL13B_KAN416-28_3.tif:0001-0058	2.21	1193.91	453	2851	85.437	9.367	0.504	2638.69	101482	4.003	0.25	0.766	1.13574
666	ARL13B_KAN416-28_3.tif:0002-0079	0.78	758.467	477	1297	26.789	12.69	0.449	591.64	22754	4.848	0.206	0.723	0.254652
667	ARL13B_KAN416-28_3.tif:0003-0339	2.678	753.117	460	1165	39.397	54.766	0.327	2016.97	77571	5.058	0.198	0.656	0.868139
668	ARL13B_KAN416-28_3.tif:0004-0415	1.066	859.024	419	2152	208.479	66.881	0.474	915.775	35220	3.971	0.252	0.713	0.394166
669	ARL13B_KAN416-28_3.tif:0005-0849	0.988	1040.53	325	1936	213.796	136.778	0.593	1028.1	39540	2.362	0.423	0.776	0.442513
670	ARL13B_KAN416-28_3.tif:0006-0877	2.444	910.266	450	2268	88.809	141.38	0.21	2224.82	85565	11.13	0.09	0.591	0.957604
671	ARL13B_KAN416-28_3.tif:0007-0890	1.274	979.531	427	3384	150.991	143.702	0.295	1248	47997	6.146	0.163	0.563	0.53716
672	ARL13B_KAN416-28_3.tif:0008-0910	1.482	917.491	298	2417	199.589	147.172	0.338	1359.8	52297	3.31	0.302	0.551	0.585284
673	ARL13B_KAN416-28_4.tif:0001-0043	1.196	693.348	354	1310	98.934	7.074	0.331	829.294	31894	4.428	0.226	0.551	0.356943
674	ARL13B_KAN416-28_4.tif:0002-0088	2.886	828.937	452	1653	154.146	14.057	0.348	2392.46	92012	5.186	0.193	0.634	1.02976
675	ARL13B_KAN416-28_4.tif:0003-0183	1.066	673.098	453	1062	196.676	29.578	0.51	717.565	27597	4.308	0.232	0.774	0.308853
676	ARL13B_KAN416-28_4.tif:0004-0561	1.716	636.621	313	1171	149.359	90.366	0.262	1092.51	42017	6.862	0.146	0.539	0.470235
677	ARL13B_KAN416-28_4.tif:0005-0687	1.534	573.831	312	914	129.332	110.72	0.393	880.309	33856	3.344	0.299	0.621	0.378901
678	ARL13B_KAN416-28_4.tif:0006-0779	1.69	781.677	141	1412	203.717	125.392	0.235	1321.11	50809	7.529	0.133	0.65	0.568631
679	ARL13B_KAN416-28_4.tif:0007-0909	2.34	1160.29	452	2146	213.18	146.551	0.374	2715.24	104426	6.246	0.16	0.811	1.16869
680	ARL13B_KAN416-28_4.tif:0008-0906	1.144	606.886	293	1220	222.554	146.213	0.266	694.32	26703	5.88	0.17	0.629	0.298848
681	ARL13B_KAN416-28_4.tif:0009-0917	0.754	567.138	385	800	98.265	147.869	0.395	427.648	16447	3.995	0.25	0.574	0.184067
682	ARL13B_KAN416-28_4.tif:0010-1000	1.638	797.238	222	2170	204.226	161.52	0.308	1305.95	50226	7.323	0.137	0.764	0.562106
683	ARL13B_KAN416-28_4.tif:0011-1035	0.858	1471.36	562	3095	164.243	167.009	0.393	1262.51	48555	4.447	0.225	0.868	0.543405
684	ARL13B_KAN416-28_5.tif:0001-0035	2.392	1275.32	463	3060	171.789	5.507	0.276	3050.74	117329	7.431	0.135	0.662	1.31309
685	ARL13B_KAN416-28_5.tif:0002-0044	1.43	681.964	457	1110	216.414	6.994	0.472	975.267	37508	4.241	0.236	0.724	0.419772
686	ARL13B_KAN416-28_5.tif:0003-0044	1.04	536.85	0	1187	125.319	6.962	0.446	558.358	21474	2.186	0.457	0.58	0.240327
687	ARL13B_KAN416-28_5.tif:0004-0105	1.17	864.778	464	2073	174.496	16.908	0.363	1011.85	38915	5.197	0.192	0.596	0.435519
688	ARL13B_KAN416-28_5.tif:0005-0156	1.274	681.816	242	1325	79.702	25.384	0.587	868.686	33409	1.846	0.542	0.721	0.373898
689	ARL13B_KAN416-28_5.tif:0006-0163	2.522	1366.56	453	3759	124.719	26.288	0.424	3446.66	132556	4.902	0.204	0.671	1.48351
690	ARL13B_KAN416-28_5.tif:0007-0271	2.964	1087.89	453	2432	34.967	43.785	0.416	3224.71	124020	5.082	0.197	0.699	1.38797
691	ARL13B_KAN416-28_5.tif:0008-0401	1.118	913.977	484	1927	148.746	64.701	0.476	1021.89	39301	3.893	0.257	0.652	0.439839
692	ARL13B_KAN416-28_5.tif:0009-0523	1.248	887.438	199	2029	141.776	84.297	0.319	1107.59	42597	5.446	0.184	0.585	0.476726
693	ARL13B_KAN416-28_5.tif:0010-0521	0.884	653.059	282	1208	86.591	84.016	0.379	577.339	22204	5.065	0.197	0.66	0.248497
694	ARL13B_KAN416-28_5.tif:0011-0564	2.028	1037.69	449	2380	135.961	90.962	0.268	2104.57	80940	4.964	0.201	0.5	0.905843
695	ARL13B_KAN416-28_5.tif:0012-0817	1.872	1120.9	414	3881	103.525	131.923	0.288	2098.46	80705	7.214	0.139	0.664	0.903213
696	ARL13B_KAN416-28_5.tif:0013-0840	1.586	761.754	454	1570	196.343	135.377	0.571	1208.21	46467	2.838	0.352	0.782	0.520037
697	ARL13B_KAN416-28_5.tif:0014-0886	2.756	1426.47	314	3846	118.867	142.875	0.277	3931.59	151206	7.638	0.131	0.635	1.69223
698	ARL13B_KAN416-28_6.tif:0001-0237	0.78	509.367	259	652	195.731	38.34	0.289	397.33	15281	6.497	0.154	0.619	0.171018
699	ARL13B_KAN416-28_6.tif:0002-0546	3.12	799.475	450	1710	179.96	87.752	0.248	2494.51	95937	7.034	0.142	0.559	1.07368
700	ARL13B_KAN416-28_6.tif:0003-0614	0.806	508.097	359	762	184.187	99.093	0.328	409.551	15751	6.154	0.163	0.795	0.176278
701	ARL13B_KAN416-28_6.tif:0004-0803	0.65	547.24	450	634	175.198	129.551	0.555	355.727	13681	3.581	0.279	0.725	0.153111
702	ARL13B_KAN416-28_6.tif:0005-0812	0.676	507.269	257	708	58.583	131.22	0.328	342.935	13189	3.258	0.307	0.51	0.147605
703	ARL13B_KAN416-28_6.tif:0006-0817	0.754	585.448	452	784	173.024	131.783	0.573	441.455	16978	3.291	0.304	0.773	0.19001
704	ARL13B_KAN416-28_6.tif:0007-0860	1.222	768.277	463	1451	66.835	138.612	0.379	938.891	36109	2.519	0.397	0.531	0.404115
705	ARL13B_KAN416-28_6.tif:0008-0866	0.988	887.237	457	1726	67.84	139.753	0.33	876.643	33715	2.758	0.363	0.49	0.377323
706	ARL13B_KAN416-28_6.tif:0009-0898	0.702	762.074	471	1214	140.703	144.961	0.582	535.008	20576	3.103	0.322	0.75	0.230277
707	ARL13B_KAN416-28_6.tif:0010-0971	1.924	637.595	90	1500	179.685	156.925	0.172	1226.81	47182	5.89	0.17	0.392	0.528039
708	ARL13B_KAN416-28_6.tif:0011-0966	1.612	633.032	372	1002	156.618	155.892	0.589	1020.51	39248	3.031	0.33	0.795	0.439245
709	ARL13B_KAN416-28_7.tif:0001-0060	1.846	963.62	181	2877	47.57	9.856	0.541	1778.95	68417	2.787	0.359	0.736	0.765691
710	ARL13B_KAN416-28_7.tif:0002-0104	2.366	963.11	263	3022	74.055	16.773	0.284	2278.86	87643	6.247	0.16	0.578	0.98086
711	ARL13B_KAN416-28_7.tif:0003-0178	1.196	924.217	427	2215	213.625	28.671	0.457	1105.43	42514	4.363	0.229	0.736	0.475797
712	ARL13B_KAN416-28_7.tif:0004-0203	0.702	779.259	450	1319	132.771	32.785	0.544	547.073	21040	3.34	0.299	0.771	0.23547
713	ARL13B_KAN416-28_7.tif:0005-0572	1.482	1100.53	473	2343	103.193	92.335	0.483	1631.08	62730	4.366	0.229	0.683	0.702045
714	ARL13B_KAN416-28_7.tif:0006-0660	0.858	797.364	456	1647	80.857	106.413	0.358	684.179	26313	5.212	0.192	0.6	0.294483
										56452.6				0.631791
715	ARL13B_KAN416-29_1.tif:0001-0047	1.274	1234.06	366	3145	151.972	7.561	0.547	1572.29	60469	3.64	0.275	0.79	0.676741
716	ARL13B_KAN416-29_1.tif:0002-0108	1.586	860.541	294	1602	38.13	17.43	0.444	1364.9	52493	4.352	0.23	0.744	0.587477
717	ARL13B_KAN416-29_1.tif:0003-0148	1.456	1364.57	488	3072	125.542	23.951	0.472	1986.94	76416	3.733	0.268	0.704	0.855212
718	ARL13B_KAN416-29_1.tif:0004-0258	1.898	1561.33	488	3800	91.876	41.654	0.475	2963.58	113977	3.512	0.285	0.652	1.27558
719	ARL13B_KAN416-29_1.tif:0005-0290	2.106	991.16	454	2287	17.569	46.879	0.295	2087.51	80284	7.376	0.136	0.669	0.898501
720	ARL13B_KAN416-29_1.tif:0006-0324	2.054	1673.42	457	3801	148.286	52.309	0.38	3437.41	132200	4.84	0.207	0.667	1.47952
721	ARL13B_KAN416-29_1.tif:0007-0585	2.912	1543.94	453	3780	137.692	94.349	0.276	4496.22	172921	7.771	0.129	0.649	1.93525
722	ARL13B_KAN416-29_1.tif:0008-0860	2.184	1032.56	480	2804	10.322	138.625	0.234	2255.25	86735	6.47	0.155	0.538	0.970698
723	ARL13B_KAN416-29_1.tif:0009-0920	0.858	710.364	484	1235	222.811	148.396	0.426	609.529	23442	4.565	0.219	0.667	0.262352
724	ARL13B_KAN416-29_1.tif:0010-0978	0.806	543.935	456	696	178.054	157.637	0.526	438.438	16862	3.02	0.331	0.721	0.188712
725	ARL13B_KAN416-29_1.tif:0011-1009	2.236	1163.2	452	2946	130.367	162.728	0.422	2601.07	100035	4.913	0.204	0.751	1.11955
726	ARL13B_KAN416-29_2.tif:0001-0035	1.534	910.576	451	1730	103.822	5.694	0.372	1396.91	53724	5.682	0.176	0.715	0.601254
727	ARL13B_KAN416-29_2.tif:0002-0109	1.534	935.237	451	2002	81.465	17.692	0.417	1434.74	55179	5.295	0.189	0.792	0.617538
728	ARL13B_KAN416-29_2.tif:0003-0138	1.014	805.615	394	1443	117.045	22.292	0.492	816.943	31419	4.206	0.238	0.78	0.351627
729	ARL13B_KAN416-29_2.tif:0004-0168	2.834	924.541	159	2287	125.295	27.036	0.266	2620.31	100775	8.597	0.116	0.663	1.12783
730	ARL13B_KAN416-29_2.tif:0005-0205	2.522	1206.74	470	2870	216.674	33.07	0.288	3043.59	117054	5.202	0.192	0.61	1.31001
731	ARL13B_KAN416-29_2.tif:0006-0266	2.054	648.089	462	967	194.26	42.92	0.398	1331.25	51199	4.983	0.201	0.712	0.572995
732	ARL13B_KAN416-29_2.tif:0007-0275	1.612	665.919	356	1109	45.153	44.482	0.176	1073.53	41287	9.68	0.103	0.532	0.462065
733	ARL13B_KAN416-29_2.tif:0008-0304	1.17	936.6	459	1921	142.575	48.964	0.313	1095.89	42147	7.374	0.136	0.629	0.47169
734	ARL13B_KAN416-29_2.tif:0009-0396	1.612	792.339	323	1905	203.698	63.865	0.357	1277.33	49125	6.013	0.166	0.816	0.549784
735	ARL13B_KAN416-29_2.tif:0010-0460	2.366	1354.45	462	2639	116.092	74.286	0.312	3204.82	123255	4.143	0.241	0.553	1.37941
736	ARL13B_KAN416-29_2.tif:0011-0459	1.768	1673.13	453	3853	13.099	74.092	0.506	2958.28	113773	3.78	0.265	0.743	1.27329
737	ARL13B_KAN416-29_2.tif:0012-0540	1.586	617.967	177	1351	205.941	87.071	0.155	980.155	37696	11.038	0.091	0.45	0.421876
738	ARL13B_KAN416-29_2.tif:0013-0549	2.288	738.92	338	1725	16.33	88.585	0.214	1690.75	65025	9.796	0.102	0.607	0.72773
739	ARL13B_KAN416-29_2.tif:0014-0569	1.924	809.486	456	1405	9.183	91.758	0.487	1557.55	59902	4.246	0.236	0.763	0.670395
740	ARL13B_KAN416-29_2.tif:0015-0578	2.444	1018.72	176	2590	48.246	93.142	0.344	2489.91	95760	4.369	0.229	0.662	1.0717
741	ARL13B_KAN416-29_2.tif:0016-0587	1.794	709.391	408	1521	90.43	94.538	0.205	1272.72	48948	9.83	0.102	0.611	0.547803
742	ARL13B_KAN416-29_2.tif:0017-0745	1.664	952.906	293	2772	181.958	120.194	0.53	1585.73	60986	3.535	0.283	0.8	0.682527
743	ARL13B_KAN416-29_2.tif:0018-0843	2.288	847.068	271	2054	92.948	135.879	0.479	1938.21	74542	2.672	0.374	0.667	0.834239
744	ARL13B_KAN416-29_2.tif:0019-0863	2.132	1513.67	465	3771	18.178	139.287	0.501	3227.34	124121	3.678	0.272	0.726	1.3891
745	ARL13B_KAN416-29_2.tif:0020-0913	1.43	635.418	277	1245	182.393	147.308	0.279	908.703	34948	7.067	0.142	0.591	0.391122
746	ARL13B_KAN416-29_2.tif:0021-0966	1.95	673.88	117	1293	204.406	155.932	0.313	1314.14	50541	5.379	0.186	0.591	0.565631
747	ARL13B_KAN416-29_2.tif:0022-0965	1.976	990.066	377	2208	92.85	155.553	0.245	1956.49	75245	8.857	0.113	0.738	0.842107
748	ARL13B_KAN416-29_2.tif:0023-1031	1.222	817.894	452	1550	9.732	165.921	0.286	999.526	38441	3.453	0.29	0.468	0.430214
749	ARL13B_KAN416-29_3.tif:0001-0006	0.884	1185.68	471	2438	58.116	0.892	0.587	1048.2	40313	2.414	0.414	0.791	0.451164
750	ARL13B_KAN416-29_3.tif:0002-0013	1.378	606.906	455	913	115.128	2.186	0.197	836.366	32166	9.429	0.106	0.482	0.359987
751	ARL13B_KAN416-29_3.tif:0003-0020	2.288	937.443	394	2528	77.717	3.245	0.212	2145	82495	10.337	0.097	0.62	0.923246
752	ARL13B_KAN416-29_3.tif:0004-0063	3.25	629.096	281	1109	10.281	10.339	0.304	2044.68	78637	5.759	0.174	0.641	0.880069
753	ARL13B_KAN416-29_3.tif:0005-0070	2.652	983.049	335	2636	162.535	11.357	0.306	2607.2	100271	8.709	0.115	0.813	1.12219
754	ARL13B_KAN416-29_3.tif:0006-0243	1.768	629.971	453	1109	60.255	39.305	0.272	1113.86	42838	6.9	0.145	0.594	0.479423
755	ARL13B_KAN416-29_3.tif:0007-0283	2.028	1315.19	252	2560	101.013	45.634	0.584	2667.37	102585	2.366	0.423	0.772	1.14808
756	ARL13B_KAN416-29_3.tif:0008-0500	2.99	789.983	450	1733	18.027	80.523	0.356	2362.19	90848	5.524	0.181	0.693	1.01673
757	ARL13B_KAN416-29_3.tif:0009-0509	2.184	931.845	459	2053	133.288	82.211	0.316	2035.27	78275	6.557	0.153	0.661	0.876017
758	ARL13B_KAN416-29_3.tif:0010-0625	0.754	685.862	450	1031	43.857	100.756	0.584	517.171	19890	3.018	0.331	0.773	0.2226
759	ARL13B_KAN416-29_3.tif:0011-0639	0.858	608.394	452	1003	42.186	103.168	0.467	522.033	20077	4.273	0.234	0.68	0.224692
760	ARL13B_KAN416-29_3.tif:0012-0652	2.808	832.759	283	1856	63.403	105.092	0.336	2338.53	89938	7.401	0.135	0.806	1.00654
761	ARL13B_KAN416-29_3.tif:0013-0856	0.884	734.118	256	1749	54.052	138.035	0.258	648.999	24960	5.805	0.172	0.562	0.279341
762	ARL13B_KAN416-29_3.tif:0014-0931	2.73	905.638	457	1919	106.089	150.318	0.257	2472.54	95092	7.836	0.128	0.634	1.06423
763	ARL13B_KAN416-29_3.tif:0015-0956	0.598	656.565	481	1047	191.758	154.243	0.59	392.65	15101	2.588	0.386	0.742	0.169003
764	ARL13B_KAN416-29_3.tif:0016-0969	0.78	592.1	353	915	190.297	156.423	0.216	461.866	17763	7.285	0.137	0.476	0.198795
765	ARL13B_KAN416-29_3.tif:0017-0990	1.014	749.462	463	1192	28.32	159.611	0.522	760	29229	3.951	0.253	0.757	0.327117
766	ARL13B_KAN416-29_4.tif:0001-0011	1.612	1130.11	450	2368	126.977	1.62	0.464	1821.85	70067	3.363	0.297	0.697	0.784157
767	ARL13B_KAN416-29_4.tif:0002-0016	1.664	1109.89	527	2578	220.996	2.676	0.311	1846.97	71033	6.66	0.15	0.634	0.794968
768	ARL13B_KAN416-29_4.tif:0003-0100	1.56	970.65	460	2373	166.018	16.233	0.359	1514.31	58239	4.785	0.209	0.667	0.651784
769	ARL13B_KAN416-29_4.tif:0004-0171	1.82	962.886	466	1897	200.565	27.615	0.417	1752.56	67402	4.907	0.204	0.676	0.754332
770	ARL13B_KAN416-29_4.tif:0005-0206	1.534	1070.47	500	2354	151.123	33.487	0.337	1642.21	63158	5.938	0.168	0.707	0.706835
771	ARL13B_KAN416-29_4.tif:0006-0227	2.106	599.654	359	954	214.603	36.943	0.485	1262.95	48572	3.542	0.282	0.764	0.543595
772	ARL13B_KAN416-29_4.tif:0007-0228	1.924	1567.2	477	3836	81.401	36.837	0.469	3015.48	115973	4.74	0.211	0.759	1.29792
773	ARL13B_KAN416-29_4.tif:0008-0404	1.274	1495	401	3825	0.943	65.548	0.418	1904.74	73255	2.506	0.399	0.676	0.819836
774	ARL13B_KAN416-29_4.tif:0009-0470	2.08	1048.25	374	2989	184.381	75.675	0.334	2180.49	83860	6.045	0.165	0.64	0.938522
775	ARL13B_KAN416-29_4.tif:0010-0485	3.068	1113.48	453	2992	25.346	78.314	0.265	3416.37	131391	7.91	0.126	0.641	1.47047
776	ARL13B_KAN416-29_4.tif:0011-0496	2.132	1190.45	456	2734	61.413	80.043	0.474	2538.2	97617	4.459	0.224	0.792	1.09248
777	ARL13B_KAN416-29_4.tif:0012-0552	2.626	1292.16	365	3062	208.232	89.126	0.392	3393.41	130508	4.248	0.235	0.704	1.46058
778	ARL13B_KAN416-29_4.tif:0013-0571	1.222	754.915	456	1416	162.583	92.117	0.502	922.562	35481	4.152	0.241	0.752	0.397087
779	ARL13B_KAN416-29_4.tif:0014-0716	2.626	1126.31	445	2448	87.173	115.675	0.439	2957.86	113757	4.567	0.219	0.771	1.27312
780	ARL13B_KAN416-29_4.tif:0015-0747	2.106	1198.49	457	3858	157.009	120.485	0.313	2524.18	97078	6.823	0.147	0.621	1.08645
781	ARL13B_KAN416-29_4.tif:0016-0755	2.002	1729.52	454	3715	21.768	121.755	0.43	3462.71	133173	4.557	0.219	0.77	1.49041
782	ARL13B_KAN416-29_4.tif:0017-0775	2.834	996.046	311	2153	63.791	125.129	0.34	2822.96	108569	5.105	0.196	0.675	1.21505
783	ARL13B_KAN416-29_4.tif:0018-0791	2.002	1282.4	460	3359	111.19	127.659	0.43	2567.53	98745	4.748	0.211	0.726	1.10511
784	ARL13B_KAN416-29_5.tif:0001-0052	0.78	557.433	409	745	178.816	8.315	0.552	434.824	16723	2.762	0.362	0.75	0.187156
785	ARL13B_KAN416-29_5.tif:0002-0269	0.884	994.676	456	1818	25.947	43.433	0.492	879.347	33819	4.467	0.224	0.773	0.378487
786	ARL13B_KAN416-29_5.tif:0003-0392	1.196	916.87	282	2395	113.422	63.35	0.496	1096.64	42176	4.272	0.234	0.78	0.472014
787	ARL13B_KAN416-29_5.tif:0004-0398	1.664	1172.45	180	3075	207.541	64.243	0.553	1951.08	75037	3.769	0.265	0.831	0.839779
788	ARL13B_KAN416-29_5.tif:0005-0447	0.572	822.773	455	1293	64.581	72.152	0.564	470.654	18101	3.117	0.321	0.746	0.202578
789	ARL13B_KAN416-29_5.tif:0006-0645	2.99	1524.99	450	3632	34.012	104.269	0.468	4560	175374	3.709	0.27	0.744	1.9627
790	ARL13B_KAN416-29_5.tif:0007-0737	2.912	1085.43	149	3835	78.026	118.29	0.225	3160.96	121568	2.424	0.412	0.385	1.36053
791	ARL13B_KAN416-29_5.tif:0008-0794	1.378	1235.23	465	3675	23.863	127.955	0.332	1702.24	65467	6.731	0.149	0.592	0.732676
792	ARL13B_KAN416-29_5.tif:0009-0834	2.132	987.561	449	2263	193.675	134.473	0.3	2105.61	80980	7.765	0.129	0.713	0.906291
793	ARL13B_KAN416-29_5.tif:0010-0922	1.378	944.566	462	1861	112.822	148.756	0.412	1301.69	50062	5.1	0.196	0.707	0.560271
794	ARL13B_KAN416-29_5.tif:0011-0936	0.65	967.8	483	1943	110.905	151.049	0.504	629.108	24195	2.936	0.341	0.694	0.270779
795	ARL13B_KAN416-29_5.tif:0012-0975	2.184	1047.33	453	1987	192.632	157.094	0.363	2287.51	87976	4.097	0.244	0.606	0.984587
796	ARL13B_KAN416-29_6.tif:0001-0018	2.34	1394.81	457	3775	208.398	2.824	0.385	3264.05	125533	5.489	0.182	0.717	1.40491
797	ARL13B_KAN416-29_6.tif:0002-0079	2.028	797.859	334	1965	194.002	12.976	0.339	1618.15	62233	4.196	0.238	0.645	0.696483
798	ARL13B_KAN416-29_6.tif:0003-0256	3.64	826.729	478	1398	98.973	41.328	0.441	3009.47	115742	5.381	0.186	0.816	1.29533
799	ARL13B_KAN416-29_6.tif:0004-0304	1.742	962.015	456	1760	160.409	49.194	0.409	1675.93	64455	5.314	0.188	0.766	0.72135
800	ARL13B_KAN416-29_6.tif:0005-0331	3.666	782.433	382	2758	48.026	53.475	0.347	2868.57	110323	6.208	0.161	0.716	1.23468
801	ARL13B_KAN416-29_6.tif:0006-0332	1.872	1109.01	451	2653	19.234	53.553	0.495	2076.2	79849	3.842	0.26	0.731	0.893633
802	ARL13B_KAN416-29_6.tif:0007-0345	0.65	640.72	359	882	199.824	55.744	0.578	416.493	16018	2.63	0.38	0.794	0.179266
803	ARL13B_KAN416-29_6.tif:0008-0358	2.938	1079.85	171	2965	113.519	57.49	0.388	3172.79	122023	2.484	0.403	0.608	1.36562
804	ARL13B_KAN416-29_6.tif:0009-0397	2.522	1660.92	460	3686	77.984	64.034	0.438	4189.09	161109	4.548	0.22	0.729	1.80306
805	ARL13B_KAN416-29_6.tif:0010-0448	1.586	876.705	454	1823	196.547	72.455	0.342	1390.54	53479	5.528	0.181	0.589	0.598512
806	ARL13B_KAN416-29_6.tif:0011-0459	0.676	576.538	416	883	214.351	73.902	0.399	389.763	14990	4.817	0.208	0.642	0.167761
807	ARL13B_KAN416-29_6.tif:0012-0509	3.51	809.185	177	1840	177.604	82.292	0.39	2840.41	109240	2.351	0.425	0.582	1.22256
808	ARL13B_KAN416-29_6.tif:0013-0507	1.586	1271.9	484	3821	30.671	81.747	0.417	2017.36	77586	4.679	0.214	0.67	0.868307
809	ARL13B_KAN416-29_6.tif:0014-0532	2.366	777.681	280	1432	78.101	85.711	0.18	1840.11	70769	9.635	0.104	0.495	0.792014
810	ARL13B_KAN416-29_6.tif:0015-0541	2.756	1044.65	458	3092	99.341	87.277	0.223	2879.23	110733	9.604	0.104	0.616	1.23927
811	ARL13B_KAN416-29_6.tif:0016-0589	3.276	912.69	461	1759	124.207	95.085	0.458	2990.15	114999	4.332	0.231	0.783	1.28702
812	ARL13B_KAN416-29_6.tif:0017-0668	2.73	1208.54	321	3793	62.848	108.023	0.334	3299.52	126897	2.832	0.353	0.577	1.42017
813	ARL13B_KAN416-29_6.tif:0018-0685	3.224	864.79	450	1810	75.78	110.464	0.55	2788.25	107234	3.381	0.296	0.829	1.20011
814	ARL13B_KAN416-29_6.tif:0019-0695	2.522	575.907	0	1637	160.865	111.98	0.596	1452.53	55863	1.529	0.654	0.74	0.625193
815	ARL13B_KAN416-29_6.tif:0020-0762	1.17	683	456	1125	54.372	122.921	0.285	799.158	30735	6.754	0.148	0.596	0.343972
816	ARL13B_KAN416-29_6.tif:0021-0863	0.962	966.135	457	2287	150.775	139.196	0.567	929.478	35747	3.206	0.312	0.718	0.400064
817	ARL13B_KAN416-29_6.tif:0022-0870	2.314	1035.1	453	2157	215.607	140.27	0.274	2395.37	92124	7.095	0.141	0.659	1.03101
818	ARL13B_KAN416-29_6.tif:0023-0880	3.146	1130.67	451	2342	92.136	141.878	0.546	3557.3	136811	3.636	0.275	0.832	1.53113
819	ARL13B_KAN416-29_6.tif:0024-0899	1.3	601.86	381	1162	185.757	145.07	0.248	782.465	30093	7.597	0.132	0.565	0.336787
										74622.3				0.835139
1095	ARL13B_KAN416-32_1.tif:0001-0090	1.794	1413.77	485	3714	184.074	14.387	0.321	2536.45	97550	6.557	0.153	0.673	1.09173
1096	ARL13B_KAN416-32_1.tif:0002-0108	2.938	1602.68	406	3620	126.668	17.306	0.386	4708.96	181103	5.23	0.191	0.729	2.02682
1097	ARL13B_KAN416-32_1.tif:0003-0157	3.432	917.795	450	1653	127.557	25.448	0.5	3150.06	121149	4.039	0.248	0.841	1.35584
1098	ARL13B_KAN416-32_1.tif:0004-0212	2.522	1455.92	360	2744	181.354	34.103	0.319	3672.05	141224	5.743	0.174	0.628	1.58051
1099	ARL13B_KAN416-32_1.tif:0005-0214	3.042	1548.45	460	3717	51.099	34.653	0.328	4710.68	181169	5.382	0.186	0.641	2.02756
1100	ARL13B_KAN416-32_1.tif:0006-0331	1.664	1066.62	452	2681	220.099	53.464	0.428	1774.97	68264	4.85	0.206	0.696	0.763979
1101	ARL13B_KAN416-32_1.tif:0007-0390	2.6	850.71	460	1877	111.259	62.87	0.555	2211.98	85071	3.958	0.253	0.784	0.952075
1102	ARL13B_KAN416-32_1.tif:0008-0485	2.912	1091.6	457	2060	14.497	78.329	0.446	3178.93	122259	4.552	0.22	0.775	1.36827
1103	ARL13B_KAN416-32_1.tif:0009-0594	2.236	888.477	456	1586	152.749	95.723	0.566	1986.75	76409	3.559	0.281	0.811	0.855134
1104	ARL13B_KAN416-32_1.tif:0010-0694	2.366	1506.68	476	3588	129.447	112.034	0.474	3565.02	137108	3.267	0.306	0.737	1.53445
1105	ARL13B_KAN416-32_1.tif:0011-0693	3.224	1467.24	451	3095	83.954	111.766	0.578	4730.67	181938	3.476	0.288	0.855	2.03617
1106	ARL13B_KAN416-32_1.tif:0012-0756	2.34	1776.03	450	3722	143.07	121.989	0.517	4156.17	159843	4.17	0.24	0.811	1.78889
1107	ARL13B_KAN416-32_1.tif:0013-0765	2.496	744.125	463	1297	165.046	123.269	0.541	1857.45	71436	2.35	0.426	0.708	0.799479
1108	ARL13B_KAN416-32_1.tif:0014-0869	1.378	1057.74	534	2165	122.947	140.158	0.475	1457.65	56060	4.477	0.223	0.779	0.627398
1109	ARL13B_KAN416-32_1.tif:0015-1021	2.548	1063.05	455	1976	54.692	164.751	0.521	2708.82	104179	3.952	0.253	0.86	1.16592
1110	ARL13B_KAN416-32_2.tif:0001-0079	2.366	1067.12	476	1581	213.186	12.846	0.58	2524.96	97108	3.286	0.304	0.871	1.08679
1111	ARL13B_KAN416-32_2.tif:0002-0083	2.964	1971.91	453	3794	34.164	13.446	0.546	5845.1	224798	3.661	0.273	0.838	2.51583
1112	ARL13B_KAN416-32_2.tif:0003-0194	2.678	2006.82	450	3759	171.964	31.185	0.526	5374.58	206702	3.817	0.262	0.795	2.31331
1113	ARL13B_KAN416-32_2.tif:0004-0247	2.496	1480.69	391	3725	42.019	39.857	0.549	3696.02	142146	2.792	0.358	0.759	1.59083
1114	ARL13B_KAN416-32_2.tif:0005-0282	3.64	1215.38	454	2402	101.809	45.765	0.346	4424.24	170153	5.589	0.179	0.668	1.90427
1115	ARL13B_KAN416-32_2.tif:0006-0289	2.73	1184.86	451	2743	66.602	46.647	0.436	3234.86	124410	4.602	0.217	0.769	1.39234
1116	ARL13B_KAN416-32_2.tif:0007-0403	2.6	1006.58	453	2710	186.174	64.871	0.423	2617.27	100658	4.69	0.213	0.743	1.12652
1117	ARL13B_KAN416-32_2.tif:0008-0421	3.666	1452.39	451	3057	128.787	67.962	0.44	5324.78	204787	4.66	0.215	0.788	2.29188
1118	ARL13B_KAN416-32_2.tif:0009-0470	2.834	1782.72	452	3663	129.61	75.865	0.375	5052.52	194316	5.623	0.178	0.787	2.17469
1119	ARL13B_KAN416-32_2.tif:0010-0525	3.38	1179.9	456	2438	183.472	84.646	0.427	3988.3	153387	4.487	0.223	0.732	1.71664
1120	ARL13B_KAN416-32_2.tif:0011-0527	3.458	1693.92	456	3779	53.202	85.227	0.348	5857.94	225292	5.222	0.192	0.667	2.52136
1121	ARL13B_KAN416-32_2.tif:0012-0645	1.846	896.211	450	1971	222.256	104.03	0.457	1654.51	63631	4.548	0.22	0.74	0.712129
1122	ARL13B_KAN416-32_2.tif:0013-0704	2.132	1626.67	480	3740	113.437	113.451	0.466	3468.27	133387	4.898	0.204	0.77	1.49281
1123	ARL13B_KAN416-32_2.tif:0014-0798	2.314	1707.92	478	3798	16.534	128.838	0.381	3952.37	152005	5.498	0.182	0.724	1.70117
1124	ARL13B_KAN416-32_2.tif:0015-0906	1.768	1532.6	452	3200	154.809	146.164	0.431	2709.8	104217	5.185	0.193	0.747	1.16635
1125	ARL13B_KAN416-32_2.tif:0016-1008	2.444	1508.43	462	3533	131.57	162.662	0.478	3686.81	141792	3.085	0.324	0.701	1.58687
1126	ARL13B_KAN416-32_2.tif:0017-1007	2.522	2049.84	452	3785	86.02	162.331	0.477	5170.02	198835	4.409	0.227	0.789	2.22527
1127	ARL13B_KAN416-32_3.tif:0001-0104	3.146	1515.17	457	2851	204.841	16.883	0.361	4767.02	183336	5.794	0.173	0.693	2.05181
1128	ARL13B_KAN416-32_3.tif:0002-0158	1.482	1377.79	366	3363	24.913	25.578	0.594	2042.01	78534	3.638	0.275	0.877	0.878916
1129	ARL13B_KAN416-32_3.tif:0003-0161	3.614	1945.72	385	3743	167.006	25.928	0.488	7032.25	270455	3.778	0.265	0.81	3.02681
1130	ARL13B_KAN416-32_3.tif:0004-0275	2.444	2141.81	459	3610	125.705	44.237	0.525	5234.9	201330	3.48	0.287	0.793	2.25319
1131	ARL13B_KAN416-32_3.tif:0005-0289	1.82	1150.41	459	2283	195.552	46.631	0.385	2093.88	80529	5.686	0.176	0.773	0.901243
1132	ARL13B_KAN416-32_3.tif:0006-0338	3.198	1841.19	463	3706	171.791	54.485	0.428	5888.5	226467	5	0.2	0.794	2.53451
1133	ARL13B_KAN416-32_3.tif:0007-0392	2.184	949.655	252	2028	74.929	63.369	0.371	2074.17	79771	6.08	0.164	0.828	0.89276
1134	ARL13B_KAN416-32_3.tif:0008-0410	3.536	1979.18	468	3690	60.804	66.239	0.543	6998.81	269169	3.528	0.283	0.805	3.01241
1135	ARL13B_KAN416-32_3.tif:0009-0425	1.768	1088.81	460	2360	1.465	68.498	0.42	1925.13	74039	4.126	0.242	0.673	0.82861
1136	ARL13B_KAN416-32_3.tif:0010-0498	1.69	1139.89	451	2134	14.829	80.326	0.462	1926.53	74093	4.237	0.236	0.765	0.829214
1137	ARL13B_KAN416-32_3.tif:0011-0503	1.56	1149.07	191	2537	212.743	81.09	0.535	1792.65	68944	3.499	0.286	0.805	0.771589
1138	ARL13B_KAN416-32_3.tif:0012-0545	2.262	1928.86	461	3682	68.136	87.995	0.541	4363.35	167811	3.689	0.271	0.849	1.87806
1139	ARL13B_KAN416-32_3.tif:0013-0557	2.054	1703.99	301	3825	79.056	89.874	0.517	3500.2	134615	4.065	0.246	0.798	1.50655
1140	ARL13B_KAN416-32_3.tif:0014-0671	2.522	1459.1	451	2718	19.22	108.116	0.408	3680.08	141533	5.091	0.196	0.819	1.58397
1141	ARL13B_KAN416-32_3.tif:0015-0677	2.054	1951.11	463	3697	134.306	109.128	0.478	4007.83	154138	4.159	0.24	0.832	1.72504
1142	ARL13B_KAN416-32_3.tif:0016-0698	3.016	1251.74	454	3018	35.266	112.491	0.329	3775.48	145202	4.742	0.211	0.601	1.62503
1143	ARL13B_KAN416-32_3.tif:0017-0724	2.652	2164.3	451	3779	118.59	116.788	0.521	5740.08	220759	4.046	0.247	0.797	2.47063
1144	ARL13B_KAN416-32_3.tif:0018-0786	1.69	886.985	455	1669	140.643	126.982	0.349	1499.09	57654	5.747	0.174	0.726	0.645237
1145	ARL13B_KAN416-32_3.tif:0019-0835	1.976	1358.01	455	2648	2.652	134.635	0.549	2683.6	103209	3.535	0.283	0.809	1.15507
1146	ARL13B_KAN416-32_3.tif:0020-1022	2.47	1406.95	491	3318	107.575	164.778	0.483	3475.37	133660	3.762	0.266	0.734	1.49586
1147	ARL13B_KAN416-32_3.tif:0021-1025	2.158	836.458	451	1902	70.671	165.181	0.382	1805.18	69426	5.473	0.183	0.7	0.776984
1148	ARL13B_KAN416-32_4.tif:0001-0091	2.158	998.928	425	2027	195.98	14.696	0.281	2155.82	82911	8.668	0.115	0.716	0.927901
1149	ARL13B_KAN416-32_4.tif:0002-0095	2.106	1619.43	430	3615	152.683	15.28	0.503	3410.73	131174	4.413	0.227	0.839	1.46804
1150	ARL13B_KAN416-32_4.tif:0003-0214	2.236	1639.26	359	3785	144.542	34.498	0.49	3665.6	140976	4.557	0.219	0.843	1.57774
1151	ARL13B_KAN416-32_4.tif:0004-0249	1.742	958.478	440	2287	184.596	40.186	0.476	1669.77	64218	3.988	0.251	0.744	0.718698
1152	ARL13B_KAN416-32_4.tif:0005-0297	1.508	1285.85	469	2822	87.133	47.913	0.543	1939.17	74579	3.673	0.272	0.784	0.834654
1153	ARL13B_KAN416-32_4.tif:0006-0403	1.846	1627.83	476	3772	211.999	64.989	0.591	3005.16	115576	2.805	0.356	0.755	1.29347
1154	ARL13B_KAN416-32_4.tif:0007-0431	2.574	1348.05	455	3106	50.641	69.557	0.352	3470.09	133457	6.36	0.157	0.759	1.49359
1155	ARL13B_KAN416-32_4.tif:0008-0608	1.664	895.875	456	2113	27.972	98.121	0.389	1490.83	57336	5.174	0.193	0.663	0.641678
1156	ARL13B_KAN416-32_4.tif:0009-0680	1.742	1495.73	479	3132	70.337	109.719	0.528	2605.72	100214	4.196	0.238	0.848	1.12155
1157	ARL13B_KAN416-32_4.tif:0010-0682	1.976	1398.3	407	3422	208.392	110.002	0.404	2763.21	106271	5.612	0.178	0.76	1.18934
1158	ARL13B_KAN416-32_4.tif:0011-0928	2.47	629.937	382	973	52.584	149.49	0.538	1556.04	59844	2.836	0.353	0.792	0.669746
1159	ARL13B_KAN416-32_4.tif:0012-0960	2.73	1079.8	465	1955	33.641	154.851	0.322	2948.03	113379	5.782	0.173	0.712	1.26889
1160	ARL13B_KAN416-32_4.tif:0013-0967	2.548	581.48	430	808	184.118	156.087	0.496	1481.7	56985	3.787	0.264	0.769	0.63775
1161	ARL13B_KAN416-32_5.tif:0001-0086	2.002	1934.43	466	3768	122.936	13.871	0.539	3872.96	148951	3.351	0.298	0.815	1.66699
1162	ARL13B_KAN416-32_5.tif:0002-0120	2.262	1397.16	453	2909	199.619	19.421	0.434	3160.57	121553	4.795	0.209	0.77	1.36036
1163	ARL13B_KAN416-32_5.tif:0003-0171	2.548	1906.59	456	3755	72.969	27.676	0.544	4858.29	186846	3.976	0.252	0.824	2.09109
1164	ARL13B_KAN416-32_5.tif:0004-0229	1.898	1802.48	454	3735	177.946	37.102	0.521	3421.31	131581	3.816	0.262	0.777	1.47259
1165	ARL13B_KAN416-32_5.tif:0005-0367	1.924	1510.6	467	3088	28.868	59.27	0.426	2906.56	111784	5.632	0.178	0.86	1.25103
1166	ARL13B_KAN416-32_5.tif:0006-0477	1.82	1766.96	462	3750	155.671	76.967	0.539	3216.06	123687	3.703	0.27	0.843	1.38425
1167	ARL13B_KAN416-32_5.tif:0007-0577	1.768	1456.97	462	2831	27.256	93.06	0.495	2576.08	99074	4.653	0.215	0.84	1.10879
1168	ARL13B_KAN416-32_5.tif:0008-0629	2.132	1973.18	462	3712	195.054	101.259	0.52	4207.08	161801	3.214	0.311	0.713	1.8108
1169	ARL13B_KAN416-32_5.tif:0009-0660	2.028	1475.4	459	3732	2.857	106.477	0.379	2992.29	115081	5.806	0.172	0.754	1.28793
1170	ARL13B_KAN416-32_5.tif:0010-0678	2.34	1836.6	482	3659	46.519	109.231	0.517	4297.9	165294	3.831	0.261	0.766	1.84989
1171	ARL13B_KAN416-32_5.tif:0011-0694	2.548	2137.76	450	3730	123.677	111.824	0.494	5447.33	209500	3.994	0.25	0.737	2.34463
1172	ARL13B_KAN416-32_5.tif:0012-0719	2.184	1388.77	463	2937	24.823	116.033	0.508	3033.26	116657	4.388	0.228	0.781	1.30557
1173	ARL13B_KAN416-32_5.tif:0013-0749	2.002	2045.86	456	3799	166.989	120.834	0.515	4096.05	157531	4.18	0.239	0.782	1.76301
1174	ARL13B_KAN416-32_5.tif:0014-0778	2.886	1478.65	451	3526	97.98	125.556	0.475	4267.64	164130	3.97	0.252	0.735	1.83687
1175	ARL13B_KAN416-32_5.tif:0015-0840	2.392	1626.52	451	3816	206.563	135.431	0.414	3890.87	149640	4.853	0.206	0.733	1.6747
1176	ARL13B_KAN416-32_5.tif:0016-0902	3.38	2186.94	288	3769	176.907	145.402	0.409	7392.3	284302	4.574	0.219	0.785	3.18178
1177	ARL13B_KAN416-32_5.tif:0017-0997	2.574	2075.98	487	3756	181.348	160.847	0.449	5343.89	205522	4.752	0.21	0.828	2.30011
1178	ARL13B_KAN416-32_6.tif:0001-0049	4.03	1894.58	450	3718	92.318	7.932	0.515	7635.62	293660	4.005	0.25	0.829	3.28651
1179	ARL13B_KAN416-32_6.tif:0002-0127	2.236	1644.66	463	3359	20.385	20.556	0.534	3677.69	141441	3.882	0.258	0.864	1.58294
1180	ARL13B_KAN416-32_6.tif:0003-0134	2.938	1540.74	471	3659	71.472	21.762	0.491	4526.98	174104	4.138	0.242	0.831	1.94849
1181	ARL13B_KAN416-32_6.tif:0004-0154	1.924	1221.82	454	2326	166.859	24.996	0.547	2350.93	90415	3.071	0.326	0.813	1.01188
1182	ARL13B_KAN416-32_6.tif:0005-0219	2.34	1699.09	286	3684	36.684	35.419	0.502	3976.11	152918	3.515	0.284	0.776	1.71139
1183	ARL13B_KAN416-32_6.tif:0006-0252	2.574	1175.16	368	2950	185.336	40.776	0.396	3025.05	116341	4.7	0.213	0.697	1.30203
1184	ARL13B_KAN416-32_6.tif:0007-0287	2.236	1361.7	463	2663	76.669	46.373	0.468	3044.94	117106	4.224	0.237	0.764	1.3106
1185	ARL13B_KAN416-32_6.tif:0008-0335	1.82	754.986	451	1472	191.537	53.862	0.279	1374.16	52849	4.971	0.201	0.526	0.591461
1186	ARL13B_KAN416-32_6.tif:0009-0414	2.444	1724.01	458	3691	203.854	66.601	0.551	4213.74	162057	3.444	0.29	0.821	1.81367
1187	ARL13B_KAN416-32_6.tif:0010-0455	2.236	1830.58	409	3727	128.419	73.404	0.598	4093.43	157430	3.469	0.288	0.851	1.76188
1188	ARL13B_KAN416-32_6.tif:0011-0500	2.288	1195.75	453	2627	99.26	80.665	0.336	2736.04	105226	6.647	0.15	0.724	1.17764
1189	ARL13B_KAN416-32_6.tif:0012-0552	2.366	1481.16	458	3656	60.486	89.105	0.339	3504.65	134786	6.583	0.152	0.722	1.50846
1190	ARL13B_KAN416-32_6.tif:0013-0568	2.522	1434.46	465	3209	214.505	91.538	0.438	3617.94	139143	5.388	0.186	0.898	1.55722
1191	ARL13B_KAN416-32_6.tif:0014-0616	3.302	839.181	450	1666	96.897	99.454	0.404	2771.14	106576	4.261	0.235	0.688	1.19275
1192	ARL13B_KAN416-32_6.tif:0015-0630	3.016	1240.9	465	2730	133.724	101.921	0.302	3742.77	143944	5.386	0.186	0.617	1.61095
1193	ARL13B_KAN416-32_6.tif:0016-0637	1.82	1649.1	463	3779	182.535	102.827	0.486	3001.54	115437	4.426	0.226	0.791	1.29192
1194	ARL13B_KAN416-32_6.tif:0017-0753	2.184	1248.15	453	2730	204.206	121.485	0.435	2726.13	104845	5.237	0.191	0.753	1.17338
1195	ARL13B_KAN416-32_6.tif:0018-0802	2.054	1764.09	465	3725	54.05	129.362	0.48	3623.66	139363	4.21	0.238	0.806	1.55969
1196	ARL13B_KAN416-32_6.tif:0019-0815	1.716	1090.06	480	2118	17.173	131.475	0.4	1870.66	71944	5.47	0.183	0.767	0.805164
1197	ARL13B_KAN416-32_6.tif:0020-0877	3.25	1026.12	454	2589	215.393	141.458	0.415	3335.09	128265	4.793	0.209	0.676	1.43548
1198	ARL13B_KAN416-32_6.tif:0021-0893	2.73	1186.87	456	2846	82.803	143.976	0.485	3240.34	124621	3.372	0.297	0.684	1.3947
1199	ARL13B_KAN416-32_6.tif:0022-0903	2.938	1224.23	369	3765	198.244	145.742	0.329	3597.01	138338	6.933	0.144	0.713	1.54821
1200	ARL13B_KAN416-32_6.tif:0023-0914	1.456	1339.62	472	2927	30.946	147.547	0.437	1950.61	75019	4.928	0.203	0.8	0.839578
1201	ARL13B_KAN416-32_6.tif:0024-0928	2.158	1858	453	3788	149.835	149.526	0.482	4009.8	154214	3.536	0.283	0.686	1.72589
1202	ARL13B_KAN416-32_6.tif:0025-1014	2.366	771.209	364	1264	66.299	163.429	0.59	1824.79	70180	2.528	0.396	0.824	0.785422
1203	ARL13B_KAN416-32_6.tif:0026-1028	1.612	1172.08	467	2794	105.273	165.734	0.406	1889.51	72669	4.391	0.228	0.667	0.813278
										133301				1.49184
1204	ARL13B_KAN416-33_1.tif:0001-0034	2.808	732.667	452	1797	17.439	5.442	0.366	2057.45	79128	6.266	0.16	0.725	0.885564
1205	ARL13B_KAN416-33_1.tif:0002-0102	2.47	744.168	356	1377	169.897	16.562	0.297	1838.21	70696	6.226	0.161	0.557	0.791197
1206	ARL13B_KAN416-33_1.tif:0003-0320	1.56	1030.67	453	1726	71.243	51.525	0.424	1607.94	61840	5.093	0.196	0.719	0.692085
1207	ARL13B_KAN416-33_1.tif:0004-0325	2.002	1129.84	463	3220	212.129	52.403	0.235	2262.08	86998	8.566	0.117	0.655	0.973641
1208	ARL13B_KAN416-33_1.tif:0005-0407	2.288	1167.15	483	2309	111.292	65.785	0.328	2670.59	102709	6.657	0.15	0.701	1.14947
1209	ARL13B_KAN416-33_1.tif:0006-0576	2.028	1491.65	133	3757	94.321	92.7	0.327	3025.26	116349	4.536	0.22	0.614	1.30212
1210	ARL13B_KAN416-33_1.tif:0007-0709	3.406	1339.08	422	3191	32.372	114.626	0.256	4561.19	175420	5.193	0.193	0.556	1.96322
1211	ARL13B_KAN416-33_1.tif:0008-0752	1.872	1557	455	3411	68.31	121.28	0.523	2914.88	112104	3.899	0.257	0.8	1.25462
1212	ARL13B_KAN416-33_1.tif:0009-0812	2.34	1692.29	498	3325	198.742	130.842	0.536	3960.19	152306	3.482	0.287	0.732	1.70454
1213	ARL13B_KAN416-33_1.tif:0010-0951	2.184	1575.23	465	3768	81.303	153.318	0.448	3440.5	132319	4.489	0.223	0.75	1.48085
1214	ARL13B_KAN416-33_1.tif:0011-1032	0.754	967.345	453	1822	199.541	166.418	0.569	729.422	28053	3.559	0.281	0.795	0.313956
1215	ARL13B_KAN416-33_2.tif:0001-0079	1.3	534.94	411	632	34.482	12.929	0.411	695.464	26747	4.154	0.241	0.671	0.29934
1216	ARL13B_KAN416-33_2.tif:0002-0241	3.51	669.215	452	1291	61.757	38.863	0.391	2349.09	90344	5.49	0.182	0.776	1.01109
1217	ARL13B_KAN416-33_2.tif:0003-0484	3.146	1335.11	458	2941	203.614	78.122	0.498	4200.5	161548	4.348	0.23	0.793	1.80797
1218	ARL13B_KAN416-33_2.tif:0004-0563	1.326	1081.2	41	3827	133.966	91.051	0.422	1433.75	55141	3.655	0.274	0.694	0.617112
1219	ARL13B_KAN416-33_2.tif:0005-0659	1.066	700.293	462	1314	47.571	106.447	0.26	746.557	28712	7.061	0.142	0.532	0.321331
1220	ARL13B_KAN416-33_2.tif:0006-0775	0.806	615.323	304	915	137.611	124.997	0.56	495.98	19075	3.459	0.289	0.756	0.213479
1221	ARL13B_KAN416-33_2.tif:0007-0802	0.728	807.143	468	1355	76.818	129.253	0.419	587.635	22600	3.516	0.284	0.651	0.252929
1222	ARL13B_KAN416-33_2.tif:0008-0811	1.17	1019.76	467	2094	117.202	130.74	0.433	1193.19	45889	4.741	0.211	0.769	0.513568
1223	ARL13B_KAN416-33_2.tif:0009-0872	2.158	541.217	398	707	56.897	140.642	0.434	1168.02	44921	4.542	0.22	0.722	0.502735
1224	ARL13B_KAN416-33_2.tif:0010-0899	1.118	1136.26	467	3050	186.834	144.928	0.599	1270.41	48859	3.139	0.319	0.782	0.546807
1225	ARL13B_KAN416-33_3.tif:0001-0022	2.496	1531.34	457	3419	191.419	3.502	0.546	3822.46	147009	4.082	0.245	0.824	1.64526
1226	ARL13B_KAN416-33_3.tif:0002-0070	2.028	1591.01	459	3674	118.961	11.3	0.59	3226.77	124099	3.096	0.323	0.754	1.38886
1227	ARL13B_KAN416-33_3.tif:0003-0094	3.406	1347.63	456	3321	96.677	15.025	0.499	4590.29	176539	3.86	0.259	0.84	1.97574
1228	ARL13B_KAN416-33_3.tif:0004-0109	1.95	902.547	404	2250	27.77	17.586	0.303	1760.07	67691	7.248	0.138	0.739	0.757566
1229	ARL13B_KAN416-33_3.tif:0005-0121	2.86	1084.39	452	2287	18.111	19.447	0.565	3101.55	119283	3.315	0.302	0.809	1.33496
1230	ARL13B_KAN416-33_3.tif:0006-0131	1.274	1086.16	177	3838	26.568	21.185	0.4	1383.86	53222	4.87	0.205	0.671	0.595636
1231	ARL13B_KAN416-33_3.tif:0007-0147	1.664	1328.88	457	3733	69.867	23.737	0.49	2211.38	85048	4.115	0.243	0.771	0.951818
1232	ARL13B_KAN416-33_3.tif:0008-0386	2.366	1055.97	453	2473	195.413	62.334	0.336	2498.57	96093	7.448	0.134	0.737	1.07543
1233	ARL13B_KAN416-33_3.tif:0009-0404	2.496	1385.01	486	3340	164.821	65.205	0.491	3457.19	132961	4.702	0.213	0.853	1.48804
1234	ARL13B_KAN416-33_3.tif:0010-0543	2.262	766.161	284	1607	112.661	87.417	0.467	1733.16	66656	4.112	0.243	0.753	0.745983
1235	ARL13B_KAN416-33_3.tif:0011-0588	1.976	1111.88	456	2962	12.202	94.694	0.511	2197.21	84503	2.916	0.343	0.704	0.945718
1236	ARL13B_KAN416-33_3.tif:0012-0631	2.34	1466.51	474	3037	180.063	101.878	0.492	3431.84	131986	3.943	0.254	0.789	1.47713
1237	ARL13B_KAN416-33_3.tif:0013-0754	2.236	1267.43	463	2991	29.524	121.628	0.595	2834.14	108999	2.446	0.409	0.758	1.21987
1238	ARL13B_KAN416-33_3.tif:0014-0776	2.47	1465.32	453	2925	191.888	125.151	0.474	3619.55	139205	4.579	0.218	0.795	1.55792
1239	ARL13B_KAN416-33_3.tif:0015-0930	2.626	1313.97	457	3044	140.307	149.989	0.566	3450.69	132711	3.778	0.265	0.838	1.48524
1240	ARL13B_KAN416-33_3.tif:0016-0962	2.236	1919.62	450	3763	116.766	155.126	0.545	4292.52	165087	3.346	0.299	0.758	1.84758
1241	ARL13B_KAN416-33_3.tif:0017-0964	0.832	793.562	458	1247	166.879	155.566	0.588	660.284	25394	2.959	0.338	0.78	0.284198
1242	ARL13B_KAN416-33_3.tif:0018-1026	2.21	1230.02	500	3518	134.224	165.523	0.509	2718.52	104552	3.905	0.256	0.773	1.1701
1243	ARL13B_KAN416-33_3.tif:0019-1034	1.3	641.66	196	1049	34.301	166.849	0.35	834.208	32083	4.406	0.227	0.676	0.359058
1244	ARL13B_KAN416-33_4.tif:0001-0106	2.21	879.224	409	1520	36.443	17.059	0.496	1943.2	74734	4.248	0.235	0.829	0.836388
1245	ARL13B_KAN416-33_4.tif:0002-0135	1.534	1629.41	452	3781	98.238	21.888	0.568	2499.66	96135	4.011	0.249	0.861	1.0759
1246	ARL13B_KAN416-33_4.tif:0003-0142	1.3	811.4	453	1474	173.882	22.894	0.372	1054.88	40570	5.65	0.177	0.685	0.454041
1247	ARL13B_KAN416-33_4.tif:0004-0196	2.054	1331.68	392	3103	30.273	31.68	0.336	2735.44	105203	6.734	0.148	0.745	1.17738
1248	ARL13B_KAN416-33_4.tif:0005-0245	1.664	629.672	398	1003	168.471	39.63	0.57	1047.84	40299	3.602	0.278	0.889	0.451008
1249	ARL13B_KAN416-33_4.tif:0006-0275	1.794	1250.3	450	3154	98.382	44.41	0.422	2243.18	86271	4.553	0.22	0.66	0.965505
1250	ARL13B_KAN416-33_4.tif:0007-0298	0.728	798.964	455	1285	61.574	48.029	0.575	581.681	22371	3.51	0.285	0.778	0.250366
1251	ARL13B_KAN416-33_4.tif:0008-0355	1.768	1519.15	459	3582	18.281	57.277	0.438	2686.01	103302	5.313	0.188	0.768	1.15611
1252	ARL13B_KAN416-33_4.tif:0009-0416	2.08	1284.29	505	3133	91.407	67.221	0.353	2671.48	102743	6.106	0.164	0.727	1.14985
1253	ARL13B_KAN416-33_4.tif:0010-0528	2.522	1391.61	429	2848	116.666	85.199	0.369	3509.85	134986	5.751	0.174	0.732	1.5107
1254	ARL13B_KAN416-33_4.tif:0011-0726	2.964	1037.36	172	2853	39.329	117.454	0.302	3074.92	118259	5.169	0.193	0.594	1.3235
1255	ARL13B_KAN416-33_4.tif:0012-0740	1.82	1691.97	459	3778	77.349	119.323	0.432	3079.57	118438	4.972	0.201	0.753	1.3255
1256	ARL13B_KAN416-33_4.tif:0013-0811	2.236	1245.48	467	3042	200.029	130.879	0.415	2785.05	107111	5.172	0.193	0.732	1.19874
1257	ARL13B_KAN416-33_4.tif:0014-0819	2.912	2043.2	459	3728	138.452	132.137	0.486	5950.17	228839	4.294	0.233	0.78	2.56106
1258	ARL13B_KAN416-33_4.tif:0015-0906	2.002	1633.25	453	3792	32.446	146.123	0.493	3269.96	125760	4.043	0.247	0.726	1.40745
1259	ARL13B_KAN416-33_5.tif:0001-0008	0.572	763.909	450	1240	217.328	1.385	0.488	436.982	16806	4.058	0.246	0.647	0.188085
1260	ARL13B_KAN416-33_5.tif:0002-0059	2.392	893.098	461	2065	15.932	9.572	0.262	2136.42	82165	6.902	0.145	0.613	0.919553
1261	ARL13B_KAN416-33_5.tif:0003-0138	1.768	2128.04	476	3727	43.044	22.255	0.583	3762.61	144707	3.08	0.325	0.768	1.61949
1262	ARL13B_KAN416-33_5.tif:0004-0154	0.806	814.742	453	1349	197.596	24.944	0.56	656.722	25257	3.252	0.307	0.738	0.282665
1263	ARL13B_KAN416-33_5.tif:0005-0227	0.936	899.306	389	2491	146.321	36.626	0.53	841.801	32375	3.266	0.306	0.713	0.362326
1264	ARL13B_KAN416-33_5.tif:0006-0256	2.262	1294.61	460	2948	62.432	41.37	0.485	2928.58	112631	4.257	0.235	0.757	1.26051
1265	ARL13B_KAN416-33_5.tif:0007-0337	2.34	1130.09	409	2684	35.964	54.714	0.269	2644.57	101708	6.975	0.143	0.652	1.13827
1266	ARL13B_KAN416-33_5.tif:0008-0418	1.014	701.103	453	1070	177.137	67.442	0.33	710.961	27343	6.669	0.15	0.65	0.30601
1267	ARL13B_KAN416-33_5.tif:0009-0448	1.43	1199.87	456	2669	30.343	72.162	0.525	1715.92	65993	3.586	0.279	0.738	0.738563
1268	ARL13B_KAN416-33_5.tif:0010-0460	2.99	1895.23	378	3788	187.578	74.324	0.572	5667.09	217952	2.833	0.353	0.769	2.43922
1269	ARL13B_KAN416-33_5.tif:0011-0469	1.664	1028.5	250	2229	144.042	75.614	0.471	1711.53	65824	4.84	0.207	0.842	0.736672
1270	ARL13B_KAN416-33_5.tif:0012-0483	2.366	1156.54	320	3819	154.904	77.874	0.506	2736.53	105245	4.629	0.216	0.854	1.17785
1271	ARL13B_KAN416-33_5.tif:0013-0528	2.392	1687.16	472	3849	60.595	85.228	0.47	4035.94	155219	4.755	0.21	0.736	1.73714
1272	ARL13B_KAN416-33_5.tif:0014-0575	1.222	896.532	457	1790	9.464	92.806	0.426	1095.63	42137	5.035	0.199	0.74	0.471578
1273	ARL13B_KAN416-33_5.tif:0015-0607	1.144	671.295	460	1097	197.898	97.923	0.455	768.008	29537	4.811	0.208	0.721	0.330564
1274	ARL13B_KAN416-33_5.tif:0016-0686	2.288	1251.01	455	3031	136.163	110.61	0.506	2862.49	110089	4.318	0.232	0.793	1.23206
1275	ARL13B_KAN416-33_5.tif:0017-0711	2.028	1820.41	497	3748	104.221	114.682	0.467	3692.01	141992	4.177	0.239	0.784	1.58911
1276	ARL13B_KAN416-33_5.tif:0018-0711	2.132	1264.88	454	3112	88.931	114.6	0.38	2696.88	103720	5.869	0.17	0.675	1.16079
1277	ARL13B_KAN416-33_5.tif:0019-0721	2.652	1547.22	459	3526	166.936	116.329	0.459	4103.46	157816	4.275	0.234	0.758	1.7662
1278	ARL13B_KAN416-33_5.tif:0020-0768	2.392	1351.84	463	3265	152.33	124.014	0.453	3233.79	124369	4.557	0.219	0.742	1.39188
1279	ARL13B_KAN416-33_5.tif:0021-0804	1.742	1470.19	468	3112	201.453	129.586	0.488	2561.23	98503	4.536	0.22	0.798	1.1024
1280	ARL13B_KAN416-33_5.tif:0022-0862	1.95	1468.92	302	3469	176.411	139.046	0.561	2864.57	110169	3.441	0.291	0.838	1.23296
1281	ARL13B_KAN416-33_5.tif:0023-0990	1.118	749.837	412	1310	15.853	159.681	0.41	838.368	32243	5.087	0.197	0.705	0.360849
1282	ARL13B_KAN416-33_6.tif:0001-0030	1.846	1479.48	475	3146	2.465	4.816	0.462	2731.28	105043	3.913	0.256	0.696	1.17559
1283	ARL13B_KAN416-33_6.tif:0002-0032	0.572	616.682	455	902	158.67	5.131	0.524	352.763	13567	3.646	0.274	0.746	0.151836
1284	ARL13B_KAN416-33_6.tif:0003-0046	0.936	578.583	355	739	157.196	7.561	0.255	541.587	20829	7.443	0.134	0.621	0.233109
1285	ARL13B_KAN416-33_6.tif:0004-0065	1.092	804.262	457	1416	156.62	10.631	0.59	878.307	33779	3.18	0.314	0.903	0.378039
1286	ARL13B_KAN416-33_6.tif:0005-0181	2.236	1599.79	463	3581	73.138	29.261	0.368	3577.35	137582	6.216	0.161	0.732	1.53975
1287	ARL13B_KAN416-33_6.tif:0006-0242	1.56	1288.97	459	2639	10.89	39.135	0.449	2010.91	77338	4.462	0.224	0.764	0.865531
1288	ARL13B_KAN416-33_6.tif:0007-0309	1.95	1443.68	458	3371	44.014	49.924	0.389	2815.35	108276	5.49	0.182	0.781	1.21177
1289	ARL13B_KAN416-33_6.tif:0008-0310	3.406	1430.43	454	3103	206.391	49.982	0.561	4872.35	187387	3.428	0.292	0.837	2.09715
1290	ARL13B_KAN416-33_6.tif:0009-0406	1.482	800.421	454	1668	38.11	65.633	0.237	1186.3	45624	7.929	0.126	0.562	0.510603
1291	ARL13B_KAN416-33_6.tif:0010-0516	2.028	1028.65	321	2230	135.531	83.234	0.433	2086.24	80235	4.835	0.207	0.812	0.897953
1292	ARL13B_KAN416-33_6.tif:0011-0614	1.222	652.149	463	1285	110.931	98.944	0.36	796.974	30651	6.137	0.163	0.631	0.343032
1293	ARL13B_KAN416-33_6.tif:0012-0667	1.56	820.083	374	1589	214.989	107.554	0.559	1279.41	49205	4.004	0.25	0.952	0.55068
1294	ARL13B_KAN416-33_6.tif:0013-0748	2.366	1441.57	452	3776	40.625	120.832	0.43	3410.96	131183	5.267	0.19	0.82	1.46814
1295	ARL13B_KAN416-33_6.tif:0014-0836	1.82	673.429	305	1540	129.965	134.821	0.343	1225.71	47140	5.606	0.178	0.625	0.527569
1296	ARL13B_KAN416-33_6.tif:0015-0940	1.118	960.209	461	2565	128.087	151.491	0.523	1073.58	41289	3.903	0.256	0.804	0.462087
										90030.4				1.00758
1297	ARL13B_KAN416-34_1.tif:0001-0109	1.716	652.621	450	913	145.467	17.635	0.517	1119.96	43073	3.391	0.295	0.717	0.482053
1298	ARL13B_KAN416-34_1.tif:0002-0123	2.314	1913.49	0	3763	49.173	19.528	0.376	4428.09	170301	2.605	0.384	0.605	1.90593
1299	ARL13B_KAN416-34_1.tif:0003-0213	1.898	1652.56	451	3755	121.387	34.369	0.491	3136.75	120637	4.235	0.236	0.768	1.35011
1300	ARL13B_KAN416-34_1.tif:0004-0398	1.378	1306.62	452	2706	15.037	64.182	0.548	1800.63	69251	3.674	0.272	0.774	0.775025
1301	ARL13B_KAN416-34_1.tif:0005-0419	1.794	904.246	461	1841	34.696	67.637	0.599	1622.32	62393	3.005	0.333	0.821	0.698273
1302	ARL13B_KAN416-34_1.tif:0006-0450	3.276	2251.06	457	3660	110.66	72.657	0.474	7374.93	283634	4.884	0.205	0.837	3.1743
1303	ARL13B_KAN416-34_1.tif:0007-0715	1.742	937.119	455	1899	137.925	115.314	0.399	1632.56	62787	5.361	0.187	0.68	0.702683
1304	ARL13B_KAN416-34_1.tif:0008-0767	1.17	1165.33	453	2351	175.965	123.752	0.531	1363.52	52440	3.618	0.276	0.769	0.586884
1305	ARL13B_KAN416-34_1.tif:0009-0846	2.548	2003.08	480	3682	32.727	136.347	0.536	5104.16	196302	3.446	0.29	0.784	2.19692
1306	ARL13B_KAN416-34_1.tif:0010-0975	1.638	1387.38	468	3287	114.358	157.348	0.466	2272.67	87405	4.196	0.238	0.733	0.978196
1307	ARL13B_KAN416-34_1.tif:0011-1031	0.78	459.767	169	603	6.74	166.168	0.505	358.64	13793	2.763	0.362	0.833	0.154365
1308	ARL13B_KAN416-34_2.tif:0001-0006	1.17	1416.24	460	3783	128.432	1.005	0.513	1657.11	63731	2.917	0.343	0.744	0.713248
1309	ARL13B_KAN416-34_2.tif:0002-0122	1.716	1107.21	301	3514	72.922	19.748	0.346	1900.09	73076	5.106	0.196	0.68	0.817833
1310	ARL13B_KAN416-34_2.tif:0003-0156	0.546	856.286	445	1634	28.046	25.197	0.568	467.56	17982	3.01	0.332	0.667	0.201246
1311	ARL13B_KAN416-34_2.tif:0004-0352	2.132	1257.13	451	3355	72.024	56.752	0.563	2680.37	103085	3.773	0.265	0.8	1.15368
1312	ARL13B_KAN416-34_2.tif:0005-0355	2.678	1212.89	454	3097	164.338	57.4	0.455	3248.32	124928	4.062	0.246	0.691	1.39814
1313	ARL13B_KAN416-34_2.tif:0006-0364	2.34	764.567	462	1333	204.834	58.844	0.421	1789.19	68811	4.228	0.237	0.714	0.770101
1314	ARL13B_KAN416-34_2.tif:0007-0465	1.898	1586.1	452	3808	128.88	75.161	0.424	3010.59	115785	4.8	0.208	0.705	1.29581
1315	ARL13B_KAN416-34_2.tif:0008-0490	1.846	1089.94	451	2132	100.812	78.943	0.576	2012.16	77386	3.791	0.264	0.826	0.866068
1316	ARL13B_KAN416-34_2.tif:0009-0538	1.56	1581.28	455	3782	41.643	86.742	0.559	2466.95	94877	3.899	0.256	0.863	1.06182
1317	ARL13B_KAN416-34_2.tif:0010-0542	2.08	941.7	477	2203	220.614	87.47	0.338	1958.85	75336	6.128	0.163	0.705	0.843126
1318	ARL13B_KAN416-34_2.tif:0011-0545	2.86	1529.98	452	3703	169.71	87.826	0.496	4376.01	168298	4.066	0.246	0.794	1.88351
1319	ARL13B_KAN416-34_2.tif:0012-0577	2.86	1310.56	282	3530	4.794	92.821	0.415	3748.44	144162	1.887	0.53	0.59	1.61339
1320	ARL13B_KAN416-34_2.tif:0013-0620	3.016	1359.33	458	3265	185.543	99.876	0.436	4099.98	157682	4.655	0.215	0.776	1.7647
1321	ARL13B_KAN416-34_2.tif:0014-0698	1.95	1315.33	453	3759	96.439	112.605	0.473	2565.05	98650	4.048	0.247	0.743	1.10405
1322	ARL13B_KAN416-34_2.tif:0015-0800	1.846	775.592	388	1587	180.372	129.092	0.322	1431.83	55067	5.799	0.172	0.626	0.616284
1323	ARL13B_KAN416-34_2.tif:0016-0875	1.534	795.254	419	1424	5.126	141.046	0.345	1219.99	46920	6.259	0.16	0.747	0.525107
1324	ARL13B_KAN416-34_2.tif:0017-0959	1.82	646.614	452	953	204.635	154.63	0.481	1176.91	45263	3.887	0.257	0.749	0.506562
1325	ARL13B_KAN416-34_2.tif:0018-0973	1.872	1023.32	459	2079	133.656	156.847	0.396	1915.77	73679	5.612	0.178	0.778	0.824581
1326	ARL13B_KAN416-34_2.tif:0019-1022	2.054	1225.44	450	2568	75.199	164.813	0.426	2517.21	96810	4.616	0.217	0.763	1.08345
1327	ARL13B_KAN416-34_2.tif:0020-1016	2.314	631.674	198	1387	183.686	163.782	0.422	1461.78	56219	3.498	0.286	0.687	0.629177
1328	ARL13B_KAN416-34_3.tif:0001-0007	2.678	1320	315	3723	151.393	1.167	0.297	3535.17	135960	7.314	0.137	0.698	1.5216
1329	ARL13B_KAN416-34_3.tif:0002-0142	2.964	1280.16	293	2972	47.92	22.997	0.462	3794.62	145938	3.946	0.253	0.738	1.63327
1330	ARL13B_KAN416-34_3.tif:0003-0161	2.912	1785.47	456	3835	10.081	25.948	0.479	5199.61	199973	4.275	0.234	0.833	2.238
1331	ARL13B_KAN416-34_3.tif:0004-0175	2.444	1240.05	450	2773	76.481	28.073	0.45	3030.87	116565	4.597	0.218	0.783	1.30454
1332	ARL13B_KAN416-34_3.tif:0005-0186	1.326	948.922	359	1635	120.753	30.038	0.598	1258.35	48395	3.468	0.288	0.857	0.541614
1333	ARL13B_KAN416-34_3.tif:0006-0191	2.366	1285.25	463	3231	166.134	30.603	0.293	3041.09	116958	5.376	0.186	0.557	1.30894
1334	ARL13B_KAN416-34_3.tif:0007-0201	2.496	1883.42	458	3709	173.34	32.426	0.555	4701.29	180808	3.446	0.29	0.821	2.02352
1335	ARL13B_KAN416-34_3.tif:0008-0251	2.158	1654.84	339	3696	132.344	40.716	0.432	3571.37	137352	3.349	0.299	0.735	1.53718
1336	ARL13B_KAN416-34_3.tif:0009-0315	2.106	788.062	279	1912	181.572	50.371	0.299	1659.76	63833	4.844	0.206	0.672	0.714389
1337	ARL13B_KAN416-34_3.tif:0010-0312	3.224	944.403	466	1753	188.56	50.375	0.536	3044.94	117106	3.613	0.277	0.838	1.3106
1338	ARL13B_KAN416-34_3.tif:0011-0331	1.534	597.814	362	1114	18.991	53.476	0.25	917.101	35271	10.151	0.099	0.787	0.394737
1339	ARL13B_KAN416-34_3.tif:0012-0468	2.73	938.933	79	2889	143.687	75.503	0.418	2563.44	98588	1.854	0.539	0.602	1.10335
1340	ARL13B_KAN416-34_3.tif:0013-0567	1.586	687.656	442	1053	4.789	91.517	0.306	1090.69	41947	5.402	0.185	0.592	0.469451
1341	ARL13B_KAN416-34_3.tif:0014-0609	2.236	1327.35	362	2701	133.206	98.297	0.38	2968.13	114152	3.773	0.265	0.61	1.27754
1342	ARL13B_KAN416-34_3.tif:0015-0689	2.106	1041.91	414	2259	55.081	111.086	0.457	2194.4	84395	4.35	0.23	0.761	0.94451
1343	ARL13B_KAN416-34_3.tif:0016-0832	1.664	845.406	440	2158	204.737	134.271	0.399	1406.84	54106	3.415	0.293	0.64	0.605529
1344	ARL13B_KAN416-34_3.tif:0017-0884	2.548	1538.71	340	3746	144.638	142.566	0.394	3920.88	150794	4.252	0.235	0.66	1.68762
1345	ARL13B_KAN416-34_3.tif:0018-1028	3.328	977.68	459	1852	162.947	165.891	0.51	3253.91	125143	3.854	0.259	0.81	1.40054
1346	ARL13B_KAN416-34_3.tif:0019-1033	0.52	601.6	457	958	10.014	166.668	0.466	312.851	12032	4.715	0.212	0.645	0.134657
1347	ARL13B_KAN416-34_4.tif:0001-0064	2.99	2071.19	457	3767	69.811	10.389	0.464	6193.23	238187	4.471	0.224	0.846	2.66568
1348	ARL13B_KAN416-34_4.tif:0002-0140	1.742	1004.22	458	2198	144.493	22.783	0.336	1749.46	67283	4.25	0.235	0.578	0.753
1349	ARL13B_KAN416-34_4.tif:0003-0137	2.99	1731.72	250	3821	92.201	22.133	0.398	5178.16	199148	5.171	0.193	0.757	2.22877
1350	ARL13B_KAN416-34_4.tif:0004-0216	2.08	885.975	162	2064	61.694	34.667	0.28	1842.94	70878	5.752	0.174	0.557	0.793234
1351	ARL13B_KAN416-34_4.tif:0005-0245	1.43	1086.65	463	2041	207.958	39.517	0.472	1554.01	59766	4.356	0.23	0.683	0.668873
1352	ARL13B_KAN416-34_4.tif:0006-0263	2.34	1757.7	481	3844	118.963	42.479	0.517	4113.27	158193	4.05	0.247	0.776	1.77042
1353	ARL13B_KAN416-34_4.tif:0007-0271	2.522	2128.7	452	3718	153.002	43.675	0.541	5368.91	206484	3.629	0.276	0.822	2.31087
1354	ARL13B_KAN416-34_4.tif:0008-0391	2.626	1461.47	452	3577	60.565	62.963	0.526	3838.07	147609	3.521	0.284	0.765	1.65197
1355	ARL13B_KAN416-34_4.tif:0009-0504	2.392	1412.34	456	3629	26.487	81.133	0.307	3378.51	129935	5.647	0.177	0.609	1.45417
1356	ARL13B_KAN416-34_4.tif:0010-0593	2.132	2006.55	451	3754	95.434	95.692	0.488	4278.22	164537	3.9	0.256	0.777	1.84142
1357	ARL13B_KAN416-34_4.tif:0011-0696	2.34	1849.26	433	3781	84.022	112.262	0.418	4327.52	166433	5.156	0.194	0.753	1.86264
1358	ARL13B_KAN416-34_4.tif:0012-0697	1.3	958.76	461	1973	186.728	112.427	0.421	1246.46	47938	3.964	0.252	0.641	0.5365
1359	ARL13B_KAN416-34_4.tif:0013-0761	1.794	990.304	205	3153	163.957	122.453	0.457	1776.71	68331	3.124	0.32	0.793	0.764729
1360	ARL13B_KAN416-34_4.tif:0014-0914	1.456	644.375	254	1194	38.331	147.454	0.332	938.267	36085	5.574	0.179	0.599	0.403847
1361	ARL13B_KAN416-34_4.tif:0015-0954	1.56	1238.13	554	2586	26.155	153.972	0.393	1931.6	74288	5.103	0.196	0.71	0.831397
1362	ARL13B_KAN416-34_4.tif:0016-0987	2.912	1052.87	441	2314	173.148	159.211	0.367	3066.13	117921	5.414	0.185	0.727	1.31972
1363	ARL13B_KAN416-34_5.tif:0001-0017	2.99	1070.44	44	2718	172.649	2.771	0.438	3200.82	123101	3.496	0.286	0.712	1.37769
1364	ARL13B_KAN416-34_5.tif:0002-0112	1.534	1320.76	467	2462	42.806	18.1	0.482	2026.17	77925	4.523	0.221	0.781	0.8721
1365	ARL13B_KAN416-34_5.tif:0003-0232	2.444	1767.55	451	3833	24.718	37.381	0.495	4320.16	166150	4.145	0.241	0.825	1.85947
1366	ARL13B_KAN416-34_5.tif:0004-0235	2.054	1148.61	450	3184	119.199	37.819	0.284	2359.38	90740	7.177	0.139	0.627	1.01552
1367	ARL13B_KAN416-34_5.tif:0005-0305	2.834	1685.25	344	3732	94.684	49.2	0.356	4776.28	183692	6.077	0.165	0.749	2.0558
1368	ARL13B_KAN416-34_5.tif:0006-0321	2.444	1671.86	462	3730	185.971	51.59	0.446	4086.28	157155	3.426	0.292	0.671	1.75881
1369	ARL13B_KAN416-34_5.tif:0007-0357	0.962	892.135	452	1840	64.72	57.769	0.474	858.286	33009	4.079	0.245	0.771	0.369421
1370	ARL13B_KAN416-34_5.tif:0008-0389	1.586	1145.31	455	2291	188.27	62.64	0.564	1816.57	69864	3.032	0.33	0.744	0.781885
1371	ARL13B_KAN416-34_5.tif:0009-0557	1.82	1583.04	471	3669	12.285	89.934	0.468	2881.31	110813	4.732	0.211	0.795	1.24017
1372	ARL13B_KAN416-34_5.tif:0010-0558	2.314	1392.51	450	3411	80.168	90.078	0.48	3222.45	123933	3.964	0.252	0.761	1.387
1373	ARL13B_KAN416-34_5.tif:0011-0716	2.574	1070.03	457	2239	147.851	115.337	0.305	2754.42	105933	4.96	0.202	0.576	1.18555
1374	ARL13B_KAN416-34_5.tif:0012-0830	2.158	844.807	164	1761	15.232	133.802	0.251	1823.2	70119	4.703	0.213	0.488	0.784739
1375	ARL13B_KAN416-34_5.tif:0013-0939	2.158	1090.57	451	2834	36.791	151.24	0.268	2353.58	90517	5.62	0.178	0.553	1.01302
1376	ARL13B_KAN416-34_5.tif:0014-0978	1.118	539.395	185	893	65.154	157.742	0.585	603.08	23194	3.029	0.33	0.741	0.259576
1377	ARL13B_KAN416-34_6.tif:0001-0099	1.716	1223.38	480	3227	174.624	15.934	0.434	2099.44	80743	4.42	0.226	0.673	0.903638
1378	ARL13B_KAN416-34_6.tif:0002-0195	3.302	1745.85	454	3569	115.699	31.632	0.441	5765.15	221723	3.804	0.263	0.726	2.48142
1379	ARL13B_KAN416-34_6.tif:0003-0296	2.08	1307.16	187	3311	90.808	47.722	0.507	2719.06	104573	2.556	0.391	0.681	1.17033
1380	ARL13B_KAN416-34_6.tif:0004-0360	2.756	1427.5	481	3626	68.916	58.214	0.458	3934.43	151315	4.113	0.243	0.721	1.69345
1381	ARL13B_KAN416-34_6.tif:0005-0412	1.664	1249.55	304	3496	177.189	66.357	0.563	2079.37	79971	3.301	0.303	0.771	0.894998
1382	ARL13B_KAN416-34_6.tif:0006-0444	2.002	1397.1	465	3161	144.946	71.782	0.478	2797.17	107577	4.326	0.231	0.778	1.20395
1383	ARL13B_KAN416-34_6.tif:0007-0463	1.196	799.957	214	1939	212.934	74.89	0.209	956.806	36798	3.635	0.275	0.409	0.411826
1384	ARL13B_KAN416-34_6.tif:0008-0595	2.834	1230	463	2507	151.082	95.859	0.411	3486.03	134070	4.68	0.214	0.736	1.50045
1385	ARL13B_KAN416-34_6.tif:0009-0600	1.768	1197.93	455	2998	158.4	96.752	0.411	2118.06	81459	5.276	0.19	0.712	0.911651
1386	ARL13B_KAN416-34_6.tif:0010-0655	1.846	1323.69	316	3507	103.424	105.661	0.47	2443.68	93982	4.47	0.224	0.826	1.0518
1387	ARL13B_KAN416-34_6.tif:0011-0744	1.612	953.677	377	2105	209.734	119.692	0.387	1537.42	59128	4.432	0.226	0.693	0.661733
1388	ARL13B_KAN416-34_6.tif:0012-0750	2.834	1412.51	162	3722	185.148	120.647	0.534	4003.28	153963	2.156	0.464	0.719	1.72308
1389	ARL13B_KAN416-34_6.tif:0013-0782	0.78	663.733	412	1195	31.309	126.21	0.425	517.743	19912	2.7	0.37	0.577	0.222846
1390	ARL13B_KAN416-34_6.tif:0014-0879	1.534	658.559	373	1316	65.882	141.806	0.406	1010.29	38855	6.164	0.162	0.855	0.434847
1391	ARL13B_KAN416-34_6.tif:0015-0890	2.6	1163.2	473	2914	3.26	143.703	0.32	3024.5	116320	6.483	0.154	0.676	1.3018
1392	ARL13B_KAN416-34_6.tif:0016-0887	0.65	709.76	467	1196	205.655	142.955	0.472	461.372	17744	3.867	0.259	0.725	0.198583
1393	ARL13B_KAN416-34_6.tif:0017-0917	0.858	561.242	156	1183	204.487	147.996	0.374	481.575	18521	5.637	0.177	0.75	0.207278
1394	ARL13B_KAN416-34_6.tif:0018-0979	2.444	2138.29	467	3672	158.329	158.008	0.566	5226.29	200999	3.281	0.305	0.803	2.24949
										101999				1.14152
1395	ARL13B_KAN416-35_1.tif:0001-0007	1.872	2101.03	481	3698	200.877	1.124	0.571	3933.36	151274	3.13	0.319	0.809	1.69299
1396	ARL13B_KAN416-35_1.tif:0002-0019	2.574	2062.56	452	3748	57.111	3.063	0.453	5309.34	204193	4.614	0.217	0.736	2.28523
1397	ARL13B_KAN416-35_1.tif:0003-0194	2.444	1736.86	459	3615	65.919	31.449	0.442	4245.15	163265	4.577	0.218	0.832	1.82719
1398	ARL13B_KAN416-35_1.tif:0004-0211	1.144	1306.02	465	2264	129.421	34.097	0.498	1494.18	57465	4.654	0.215	0.854	0.643122
1399	ARL13B_KAN416-35_1.tif:0005-0252	2.782	1450.07	275	3798	97.277	40.731	0.345	4034.32	155157	6.556	0.153	0.746	1.73645
1400	ARL13B_KAN416-35_1.tif:0006-0340	3.12	1444.89	451	3444	147.79	54.879	0.412	4508.33	173387	4.826	0.207	0.714	1.94047
1401	ARL13B_KAN416-35_1.tif:0007-0348	1.872	1449.58	393	3783	29.578	55.972	0.431	2713.78	104370	4.451	0.225	0.692	1.16806
1402	ARL13B_KAN416-35_1.tif:0008-0434	3.068	1944.27	451	3734	121.557	69.981	0.499	5965.38	229424	4.226	0.237	0.814	2.56761
1403	ARL13B_KAN416-35_1.tif:0009-0463	2.366	2181.77	495	3709	180.578	74.674	0.574	5162.38	198541	3.345	0.299	0.839	2.22198
1404	ARL13B_KAN416-35_1.tif:0010-0467	1.846	1654.24	462	3586	81.169	75.294	0.556	3053.91	117451	3.382	0.296	0.793	1.31446
1405	ARL13B_KAN416-35_1.tif:0011-0470	2.002	1930.61	462	3738	66.336	75.835	0.59	3865.32	148657	3.481	0.287	0.951	1.6637
1406	ARL13B_KAN416-35_1.tif:0012-0623	2.21	1895.39	445	3757	36.436	100.524	0.472	4189.06	161108	4.777	0.209	0.85	1.80305
1407	ARL13B_KAN416-35_1.tif:0013-0664	4.472	2105.78	450	3755	76.058	107.108	0.324	9417.61	362194	5.568	0.18	0.649	4.05351
1408	ARL13B_KAN416-35_1.tif:0014-0666	2.704	1331	454	3724	188.231	107.546	0.423	3599.24	138424	5.303	0.189	0.816	1.54918
1409	ARL13B_KAN416-35_1.tif:0015-0735	2.262	1830.03	452	3730	134.717	118.475	0.527	4139.79	159213	3.998	0.25	0.87	1.78184
1410	ARL13B_KAN416-35_1.tif:0016-0772	1.586	1245.87	472	2351	18.601	124.502	0.523	1976.07	75998	4.059	0.246	0.762	0.850534
1411	ARL13B_KAN416-35_1.tif:0017-0798	2.392	1413.92	456	2909	221.153	128.741	0.574	3382.31	130081	3.396	0.294	0.836	1.45581
1412	ARL13B_KAN416-35_1.tif:0018-0881	2.574	1433.88	483	3673	27.84	142.003	0.56	3691.03	141954	3.457	0.289	0.835	1.58868
1413	ARL13B_KAN416-35_1.tif:0019-0912	2.834	2252.75	451	3741	185.505	147.206	0.495	6384.68	245550	4.202	0.238	0.835	2.74808
1414	ARL13B_KAN416-35_1.tif:0020-0947	1.768	1232.09	466	2925	1.548	152.725	0.539	2178.46	83782	3.429	0.292	0.814	0.937649
1415	ARL13B_KAN416-35_1.tif:0021-0963	2.236	1211.21	451	2650	193.959	155.233	0.392	2708.43	104164	5.152	0.194	0.758	1.16576
1416	ARL13B_KAN416-35_2.tif:0001-0031	2.678	2006	463	3760	96.214	4.992	0.595	5372.39	206618	3.277	0.305	0.858	2.31237
1417	ARL13B_KAN416-35_2.tif:0002-0043	2.236	1249.71	256	3672	171.319	7.041	0.351	2794.52	107475	6.237	0.16	0.705	1.20281
1418	ARL13B_KAN416-35_2.tif:0003-0140	2.47	2073.41	471	3745	16.577	22.615	0.512	5121.63	196974	3.81	0.262	0.769	2.20444
1419	ARL13B_KAN416-35_2.tif:0004-0224	2.444	1343.66	458	3187	76.057	36.096	0.492	3284.1	126304	4.56	0.219	0.78	1.41354
1420	ARL13B_KAN416-35_2.tif:0005-0237	3.068	1373.19	454	2865	201.45	38.092	0.512	4213.22	162037	4.045	0.247	0.792	1.81344
1421	ARL13B_KAN416-35_2.tif:0006-0246	2.6	2227.11	463	3757	46.364	39.759	0.558	5790.84	222711	3.485	0.287	0.855	2.49248
1422	ARL13B_KAN416-35_2.tif:0007-0259	2.392	1352.74	473	2569	179.273	41.713	0.521	3235.95	124452	3.549	0.282	0.751	1.39281
1423	ARL13B_KAN416-35_2.tif:0008-0358	1.274	821.571	452	1555	152.083	57.831	0.445	1046.74	40257	4.396	0.227	0.76	0.450538
1424	ARL13B_KAN416-35_2.tif:0009-0436	1.274	1158.41	414	2892	69.951	70.501	0.536	1475.9	56762	4.003	0.25	0.907	0.635254
1425	ARL13B_KAN416-35_2.tif:0010-0489	3.094	1779.86	446	3773	158.82	78.792	0.512	5507.21	211803	3.948	0.253	0.785	2.3704
1426	ARL13B_KAN416-35_2.tif:0011-0494	3.38	1995.4	470	3745	188.641	79.733	0.579	6744.86	259402	3.225	0.31	0.847	2.90311
1427	ARL13B_KAN416-35_2.tif:0012-0583	2.184	1980.68	475	3777	14.845	94.137	0.516	4326.06	166377	3.954	0.253	0.828	1.86201
1428	ARL13B_KAN416-35_2.tif:0013-0606	0.832	728.656	451	1445	124.888	97.597	0.46	606.279	23317	4.034	0.248	0.753	0.260953
1429	ARL13B_KAN416-35_2.tif:0014-0650	2.522	1726.43	470	3882	77.284	104.745	0.396	4354.33	167464	5.82	0.172	0.746	1.87418
1430	ARL13B_KAN416-35_2.tif:0015-0754	2.574	2228.79	462	3773	90.757	121.538	0.509	5737.24	220650	3.644	0.274	0.792	2.46941
1431	ARL13B_KAN416-35_2.tif:0016-0827	3.25	1841.23	454	3669	30.615	133.501	0.338	5984.36	230154	5.982	0.167	0.694	2.57578
1432	ARL13B_KAN416-35_2.tif:0017-0887	1.638	1434.59	359	2936	147.284	143.138	0.59	2350	90379	2.715	0.368	0.754	1.01148
1433	ARL13B_KAN416-35_2.tif:0018-0904	2.886	949.667	451	1572	177.206	145.951	0.567	2740.9	105413	3.273	0.306	0.816	1.17973
1434	ARL13B_KAN416-35_2.tif:0019-0940	2.418	1278.38	450	2540	205.111	151.598	0.428	3091.3	118889	4.904	0.204	0.805	1.33055
1435	ARL13B_KAN416-35_2.tif:0020-0966	2.262	959.425	451	2227	58.247	155.793	0.551	2170.35	83470	3.607	0.277	0.777	0.934157
1436	ARL13B_KAN416-35_2.tif:0021-0991	2.184	1319.92	457	2785	183.236	159.778	0.491	2882.87	110873	4.216	0.237	0.828	1.24084
1437	ARL13B_KAN416-35_2.tif:0022-1020	3.406	1860.63	458	3733	132.274	164.418	0.373	6337.67	243742	5.617	0.178	0.74	2.72785
1438	ARL13B_KAN416-35_2.tif:0023-1024	2.106	1574.78	463	3419	78.814	165.107	0.403	3316.68	127557	4.983	0.201	0.714	1.42756
1439	ARL13B_KAN416-35_3.tif:0001-0030	2.548	1249.11	457	3813	211.251	4.735	0.316	3182.93	122413	6.055	0.165	0.647	1.36999
1440	ARL13B_KAN416-35_3.tif:0002-0024	1.326	948.118	436	1958	78.496	3.856	0.41	1257.28	48354	5.468	0.183	0.81	0.541156
1441	ARL13B_KAN416-35_3.tif:0003-0050	1.56	1249.88	298	3774	53.151	8.017	0.444	1949.93	74993	4.096	0.244	0.659	0.839287
1442	ARL13B_KAN416-35_3.tif:0004-0078	4.836	1135.27	450	2218	163.79	12.522	0.489	5490.52	211161	4.443	0.225	0.857	2.36322
1443	ARL13B_KAN416-35_3.tif:0005-0163	2.34	846.522	452	1355	197.748	26.384	0.562	1980.98	76187	3.425	0.292	0.833	0.85265
1444	ARL13B_KAN416-35_3.tif:0006-0235	2.288	1651.34	452	3849	151.26	37.894	0.481	3778.5	145318	4.33	0.231	0.752	1.62633
1445	ARL13B_KAN416-35_3.tif:0007-0259	1.56	699.167	465	1135	170.742	41.893	0.444	1090.77	41950	4.396	0.227	0.755	0.469485
1446	ARL13B_KAN416-35_3.tif:0008-0384	1.742	1673.6	489	3803	128.549	61.861	0.436	2915.58	112131	4.529	0.221	0.724	1.25492
1447	ARL13B_KAN416-35_3.tif:0009-0430	1.014	659.41	351	1312	76.199	69.389	0.375	668.682	25717	5.129	0.195	0.736	0.287813
1448	ARL13B_KAN416-35_3.tif:0010-0455	3.458	1048.57	457	2516	22.481	73.322	0.245	3626.18	139460	8.963	0.112	0.695	1.56077
1449	ARL13B_KAN416-35_3.tif:0011-0466	2.73	1869.11	467	3813	118.756	75.249	0.459	5102.99	196257	4.544	0.22	0.761	2.19642
1450	ARL13B_KAN416-35_3.tif:0012-0473	3.536	1177.94	451	2293	157.086	76.223	0.509	4165.45	160200	4.02	0.249	0.802	1.79288
1451	ARL13B_KAN416-35_3.tif:0013-0555	2.6	1292.83	453	2525	37.325	89.432	0.41	3361.56	129283	5.086	0.197	0.781	1.44688
1452	ARL13B_KAN416-35_3.tif:0014-0591	2.886	1372.42	451	3016	167.772	95.188	0.57	3961.05	152339	3.04	0.329	0.779	1.70491
1453	ARL13B_KAN416-35_3.tif:0015-0615	3.926	1886.3	450	3710	90.597	99.323	0.479	7406.05	284831	4.343	0.23	0.834	3.1877
1454	ARL13B_KAN416-35_3.tif:0016-0692	2.34	1289.54	276	3691	155.388	111.718	0.399	3017.72	116059	5.027	0.199	0.732	1.29888
1455	ARL13B_KAN416-35_3.tif:0017-0746	1.274	825.939	463	1406	19.167	120.284	0.514	1052.31	40471	3.773	0.265	0.76	0.452933
1456	ARL13B_KAN416-35_3.tif:0018-0765	1.82	1152.21	463	2382	125.844	123.494	0.551	2097.16	80655	3.943	0.254	0.8	0.902653
1457	ARL13B_KAN416-35_3.tif:0019-0777	2.808	1617.68	465	3581	79.913	125.33	0.471	4542.71	174709	4.382	0.228	0.831	1.95526
1458	ARL13B_KAN416-35_3.tif:0020-0822	3.328	2067.41	450	3822	201.872	132.632	0.543	6880.77	264629	3.736	0.268	0.845	2.9616
1459	ARL13B_KAN416-35_3.tif:0021-0941	3.458	1555.15	450	3822	147.31	151.924	0.41	5378.03	206835	3.88	0.258	0.672	2.3148
1460	ARL13B_KAN416-35_3.tif:0022-0958	1.482	823.316	465	1705	48.804	154.513	0.377	1220.23	46929	6.033	0.166	0.667	0.525208
1461	ARL13B_KAN416-35_3.tif:0023-1016	2.418	1097.45	492	2187	60.038	163.786	0.375	2653.8	102063	5.492	0.182	0.75	1.14224
1462	ARL13B_KAN416-35_4.tif:0001-0010	2.886	1112.14	461	2004	119.696	1.577	0.486	3209.84	123448	4.186	0.239	0.81	1.38157
1463	ARL13B_KAN416-35_4.tif:0002-0064	1.456	801.875	451	1328	179.169	10.421	0.522	1167.6	44905	3.889	0.257	0.862	0.502556
1464	ARL13B_KAN416-35_4.tif:0003-0081	2.158	1308.25	454	2470	19.959	12.988	0.51	2823.38	108585	3.979	0.251	0.802	1.21523
1465	ARL13B_KAN416-35_4.tif:0004-0090	2.522	1495.69	467	3509	68.175	14.51	0.561	3772.36	145082	3.474	0.288	0.855	1.62369
1466	ARL13B_KAN416-35_4.tif:0005-0158	3.38	1818.75	453	3720	89.659	25.516	0.485	6147.73	236437	4.309	0.232	0.841	2.64609
1467	ARL13B_KAN416-35_4.tif:0006-0221	2.314	1052.13	453	2275	77.966	35.682	0.398	2434.79	93640	5.534	0.181	0.712	1.04798
1468	ARL13B_KAN416-35_4.tif:0007-0253	4.862	1345.48	459	2266	212.732	40.828	0.594	6542.12	251605	3.436	0.291	0.874	2.81585
1469	ARL13B_KAN416-35_4.tif:0008-0296	2.548	983.459	460	1709	169.396	47.768	0.492	2506.01	96379	3.822	0.262	0.803	1.07863
1470	ARL13B_KAN416-35_4.tif:0009-0306	2.184	1642.48	494	3743	95.011	49.435	0.423	3587.38	137968	4.187	0.239	0.669	1.54407
1471	ARL13B_KAN416-35_4.tif:0010-0372	2.08	824.538	461	1930	215.18	60.041	0.538	1715.14	65963	3.495	0.286	0.821	0.738227
1472	ARL13B_KAN416-35_4.tif:0011-0386	2.08	1370.28	385	3327	99.866	62.386	0.429	2850.34	109622	4.671	0.214	0.766	1.22684
1473	ARL13B_KAN416-35_4.tif:0012-0420	2.6	866.9	294	1761	133.621	68.102	0.354	2254.08	86690	4.49	0.223	0.694	0.970194
1474	ARL13B_KAN416-35_4.tif:0013-0450	3.484	1298.92	470	2361	214.308	72.667	0.582	4525.73	174056	3.585	0.279	0.918	1.94795
1475	ARL13B_KAN416-35_4.tif:0014-0515	2.496	1626.34	438	3522	34.151	83.197	0.599	4059.6	156129	2.442	0.409	0.78	1.74732
1476	ARL13B_KAN416-35_4.tif:0015-0552	1.976	1332	0	3799	60.929	88.573	0.342	2632.19	101232	2.597	0.385	0.555	1.13294
1477	ARL13B_KAN416-35_4.tif:0016-0558	5.798	1003.88	450	1820	167.13	89.831	0.393	5820.87	223866	5.296	0.189	0.757	2.5054
1478	ARL13B_KAN416-35_4.tif:0017-0682	3.328	1509.06	147	3611	172.265	109.847	0.407	5022.44	193159	4.527	0.221	0.723	2.16175
1479	ARL13B_KAN416-35_4.tif:0018-0698	2.6	1169.99	450	3399	100.568	112.456	0.382	3042.16	116999	5.3	0.189	0.678	1.3094
1480	ARL13B_KAN416-35_4.tif:0019-0719	2.652	1540.2	114	3780	82.53	115.6	0.4	4084.85	157100	3.573	0.28	0.75	1.75819
1481	ARL13B_KAN416-35_4.tif:0020-0768	3.458	1123.23	458	2366	130.595	123.678	0.44	3884.35	149389	4.173	0.24	0.713	1.67189
1482	ARL13B_KAN416-35_4.tif:0021-0810	2.574	1503.33	478	3206	22.674	130.63	0.429	3869.81	148830	5.073	0.197	0.742	1.66564
1483	ARL13B_KAN416-35_4.tif:0022-0807	4.472	1829.17	450	3722	157.366	130.086	0.465	8180.53	314617	4.296	0.233	0.854	3.52105
1484	ARL13B_KAN416-35_4.tif:0023-0841	2.704	1582.56	456	3094	67.793	135.56	0.586	4279.49	164586	3.332	0.3	0.856	1.84197
1485	ARL13B_KAN416-35_4.tif:0024-0854	1.742	713.328	436	1467	175.446	137.851	0.508	1242.69	47793	4.1	0.244	0.887	0.534877
1486	ARL13B_KAN416-35_4.tif:0025-0866	1.612	879.419	450	2098	118.745	139.715	0.438	1417.71	54524	4.775	0.209	0.721	0.610207
1487	ARL13B_KAN416-35_4.tif:0026-0912	2.626	1287.06	487	2884	61.435	147.045	0.361	3380.02	129993	6.053	0.165	0.754	1.45482
1488	ARL13B_KAN416-35_4.tif:0027-0930	2.626	938.426	453	1504	177.684	150.078	0.566	2464.45	94781	3.525	0.284	0.824	1.06074
1489	ARL13B_KAN416-35_4.tif:0028-1027	3.172	1145.88	380	2126	181.746	165.653	0.571	3634.94	139797	3.266	0.306	0.833	1.56454
1490	ARL13B_KAN416-35_5.tif:0001-0035	1.872	966.403	456	2060	211.37	5.74	0.396	1809.21	69581	4.008	0.249	0.658	0.778718
1491	ARL13B_KAN416-35_5.tif:0002-0086	2.6	1378.96	471	3617	173.315	13.897	0.464	3585.51	137896	4.194	0.238	0.816	1.54327
1492	ARL13B_KAN416-35_5.tif:0003-0119	1.924	1657.07	460	3691	197.514	19.182	0.532	3188.39	122623	3.739	0.267	0.822	1.37234
1493	ARL13B_KAN416-35_5.tif:0004-0150	2.028	1966.28	451	3724	160.822	24.247	0.577	3987.86	153370	3.243	0.308	0.825	1.71645
1494	ARL13B_KAN416-35_5.tif:0005-0156	1.872	1542.39	486	3805	43.746	25.124	0.409	2887.53	111052	4.862	0.206	0.67	1.24284
1495	ARL13B_KAN416-35_5.tif:0006-0196	2.262	2001.22	466	3767	103.788	31.675	0.579	4527.03	174106	3.397	0.294	0.853	1.94851
1496	ARL13B_KAN416-35_5.tif:0007-0244	2.626	1934.87	461	3817	174.165	39.333	0.521	5081.28	195422	4.008	0.25	0.802	2.18707
1497	ARL13B_KAN416-35_5.tif:0008-0312	2.418	1239.89	388	2615	204.974	50.396	0.375	2998.24	115310	5.915	0.169	0.762	1.2905
1498	ARL13B_KAN416-35_5.tif:0009-0337	3.068	1625.39	454	3726	92.089	54.47	0.372	4987	191796	6.011	0.166	0.744	2.14649
1499	ARL13B_KAN416-35_5.tif:0010-0377	1.56	792.4	269	1975	124.211	60.775	0.33	1236.22	47544	6.65	0.15	0.694	0.53209
1500	ARL13B_KAN416-35_5.tif:0011-0373	2.47	1633.76	451	3351	219.746	60.227	0.414	4035.62	155207	4.962	0.202	0.795	1.737
1501	ARL13B_KAN416-35_5.tif:0012-0447	3.9	2247.21	450	3653	99.11	71.995	0.502	8764.63	337081	3.795	0.264	0.789	3.77245
1502	ARL13B_KAN416-35_5.tif:0013-0460	2.548	1862.59	265	3794	170.713	74.134	0.504	4746.17	182534	3.095	0.323	0.74	2.04284
1503	ARL13B_KAN416-35_5.tif:0014-0548	2.444	1208.39	457	2905	174.919	88.401	0.458	2953.49	113589	4.492	0.223	0.767	1.27124
1504	ARL13B_KAN416-35_5.tif:0015-0591	2.652	1362.33	455	3353	29.189	95.446	0.372	3613.13	138958	5.456	0.183	0.68	1.55515
1505	ARL13B_KAN416-35_5.tif:0016-0632	2.34	819.4	454	1419	62.398	101.917	0.556	1917.51	73746	3.548	0.282	0.818	0.825331
1506	ARL13B_KAN416-35_5.tif:0017-0635	2.21	2157.81	466	3743	152.944	102.328	0.531	4769.05	183414	3.673	0.272	0.791	2.05268
1507	ARL13B_KAN416-35_5.tif:0018-0642	2.288	1507.93	209	3766	202.843	103.634	0.472	3450.36	132698	4.137	0.242	0.796	1.48509
1508	ARL13B_KAN416-35_5.tif:0019-0717	1.742	1937.92	464	3731	79.31	115.644	0.522	3376.07	129841	3.926	0.255	0.838	1.45312
1509	ARL13B_KAN416-35_5.tif:0020-0759	2.314	2187.55	456	3748	202.413	122.397	0.577	5062.3	194692	3.152	0.317	0.817	2.1789
1510	ARL13B_KAN416-35_5.tif:0021-0764	2.288	1387.06	472	2637	38.574	123.19	0.445	3173.78	122061	4.934	0.203	0.762	1.36605
1511	ARL13B_KAN416-35_5.tif:0022-0766	1.976	1709.37	451	3759	133.509	123.505	0.558	3377.91	129912	3.68	0.272	0.772	1.45391
1512	ARL13B_KAN416-35_5.tif:0023-0842	2.106	1463.75	452	3340	102.811	135.813	0.487	3082.85	118564	4.031	0.248	0.747	1.32691
1513	ARL13B_KAN416-35_5.tif:0024-0926	1.04	622.1	452	1031	13.787	149.543	0.431	647.023	24884	4.352	0.23	0.784	0.27849
1514	ARL13B_KAN416-35_5.tif:0025-0961	2.782	1949.94	454	3785	110.353	155.187	0.462	5425.07	208644	3.665	0.273	0.699	2.33505
1515	ARL13B_KAN416-35_5.tif:0026-0971	2.002	1519.71	457	3779	121.211	156.86	0.388	3042.65	117018	4.27	0.234	0.639	1.30961
1516	ARL13B_KAN416-35_5.tif:0027-1004	2.314	1475.11	167	3681	187.623	162.008	0.541	3413.62	131285	2.772	0.361	0.751	1.46928
1517	ARL13B_KAN416-35_6.tif:0001-0080	3.302	1177.44	461	3037	138.726	12.964	0.364	3888.14	149535	5.937	0.168	0.749	1.67353
1518	ARL13B_KAN416-35_6.tif:0002-0099	3.146	1324.42	437	3615	85.776	15.855	0.396	4166.88	160255	5.21	0.192	0.752	1.7935
1519	ARL13B_KAN416-35_6.tif:0003-0135	3.536	1430.56	465	3611	172.698	21.758	0.575	5058.76	194556	3.351	0.298	0.814	2.17738
1520	ARL13B_KAN416-35_6.tif:0004-0178	1.326	854.314	382	1717	209.143	28.802	0.4	1132.89	43570	4.114	0.243	0.611	0.487615
1521	ARL13B_KAN416-35_6.tif:0005-0197	3.51	1475.73	450	2882	90.254	31.767	0.466	5180.14	199224	4.797	0.208	0.818	2.22962
1522	ARL13B_KAN416-35_6.tif:0006-0250	3.068	1158.86	462	2087	157.664	40.389	0.499	3555.58	136745	4.058	0.246	0.84	1.53039
1523	ARL13B_KAN416-35_6.tif:0007-0258	2.47	848.632	408	2255	213.328	41.586	0.39	2096.25	80620	4.398	0.227	0.669	0.902262
1524	ARL13B_KAN416-35_6.tif:0008-0345	2.158	1507.73	477	3022	27.936	55.646	0.52	3253.89	125142	3.753	0.266	0.794	1.40053
1525	ARL13B_KAN416-35_6.tif:0009-0363	1.56	923.917	132	2331	60.372	58.735	0.488	1441.4	55435	4.41	0.227	0.828	0.620403
1526	ARL13B_KAN416-35_6.tif:0010-0381	2.886	1099.98	463	2096	199.464	61.562	0.277	3174.74	122098	6.585	0.152	0.647	1.36646
1527	ARL13B_KAN416-35_6.tif:0011-0379	2.106	2168.03	382	3739	1.07	61.021	0.545	4566.14	175610	3.529	0.283	0.853	1.96535
1528	ARL13B_KAN416-35_6.tif:0012-0394	4.186	1517.24	454	3499	132.799	63.647	0.339	6351.56	244276	5.836	0.171	0.69	2.73382
1529	ARL13B_KAN416-35_6.tif:0013-0393	2.236	1090.02	451	2191	182.766	63.394	0.345	2437.44	93742	4.921	0.203	0.616	1.04912
1530	ARL13B_KAN416-35_6.tif:0014-0410	3.016	1659.59	453	3728	158.544	66.225	0.507	5005.61	192512	4.005	0.25	0.817	2.1545
1531	ARL13B_KAN416-35_6.tif:0015-0472	2.99	2048.7	397	3770	104.286	75.997	0.522	6125.99	235601	4.06	0.246	0.833	2.63674
1532	ARL13B_KAN416-35_6.tif:0016-0547	2.184	1127.58	216	2393	111.883	88.263	0.509	2462.79	94717	4.005	0.25	0.844	1.06003
1533	ARL13B_KAN416-35_6.tif:0017-0579	3.718	1801.76	451	3763	157.78	93.582	0.415	6699.35	257652	4.443	0.225	0.715	2.88352
1534	ARL13B_KAN416-35_6.tif:0018-0603	2.314	1097.8	402	2815	89.781	97.126	0.313	2540.46	97704	7.568	0.132	0.709	1.09346
1535	ARL13B_KAN416-35_6.tif:0019-0624	2.938	1989.7	463	3802	49.981	100.489	0.416	5846.09	224836	4.185	0.239	0.651	2.51626
1536	ARL13B_KAN416-35_6.tif:0020-0738	1.82	1108.61	469	2254	146.671	119.108	0.524	2017.8	77603	4.063	0.246	0.848	0.868497
1537	ARL13B_KAN416-35_6.tif:0021-0740	2.522	1421.86	486	2669	218.466	119.264	0.503	3586.14	137920	3.96	0.253	0.812	1.54354
1538	ARL13B_KAN416-35_6.tif:0022-0753	3.224	804.194	197	1627	65.508	121.459	0.43	2592.88	99720	4.128	0.242	0.667	1.11602
1539	ARL13B_KAN416-35_6.tif:0023-0755	3.64	1383.69	464	2755	103.503	121.784	0.522	5036.92	193716	3.926	0.255	0.862	2.16798
1540	ARL13B_KAN416-35_6.tif:0024-0807	2.782	1907.08	469	3727	142.033	130.145	0.456	5305.8	204057	4.351	0.23	0.79	2.28371
1541	ARL13B_KAN416-35_6.tif:0025-0843	2.314	2191.54	453	3754	74.897	135.976	0.466	5071.53	195047	4.488	0.223	0.805	2.18288
1542	ARL13B_KAN416-35_6.tif:0026-0850	1.664	948.766	457	2055	24.477	137.178	0.294	1578.84	60721	6.204	0.161	0.595	0.679561
1543	ARL13B_KAN416-35_6.tif:0027-0931	2.028	1998.36	457	3802	202.72	150.157	0.561	4052.92	155872	3.404	0.294	0.825	1.74445
1544	ARL13B_KAN416-35_6.tif:0028-0940	2.21	1701.84	452	3685	134.326	151.515	0.474	3761.28	144656	4.097	0.244	0.773	1.61892
1545	ARL13B_KAN416-35_6.tif:0029-0970	3.302	2023.4	454	3743	184.518	156.419	0.493	6681.67	256972	4.161	0.24	0.849	2.87591
										144052				1.61216
1546	ARL13B_KAN416-36_1.tif:0001-0023	3.12	958.133	57	2600	222.11	3.556	0.408	2989.56	114976	1.737	0.576	0.599	1.28676
1547	ARL13B_KAN416-36_1.tif:0002-0125	1.898	983.11	403	1883	113.647	20.281	0.366	1866.05	71767	5.646	0.177	0.719	0.803183
1548	ARL13B_KAN416-36_1.tif:0003-0137	2.47	1843.66	470	3771	145.068	22.058	0.472	4554.12	175148	4.335	0.231	0.795	1.96018
1549	ARL13B_KAN416-36_1.tif:0004-0144	2.834	954.761	455	1969	47.464	23.305	0.353	2705.96	104069	6.481	0.154	0.692	1.16469
1550	ARL13B_KAN416-36_1.tif:0005-0205	2.808	1403.43	450	3297	195.653	33.104	0.394	3941.08	151571	5.508	0.182	0.725	1.69631
1551	ARL13B_KAN416-36_1.tif:0006-0226	1.066	640.927	456	975	117.64	36.425	0.305	683.269	26278	5.148	0.194	0.526	0.294091
1552	ARL13B_KAN416-36_1.tif:0007-0260	1.898	849.932	436	1505	159.977	41.84	0.32	1613.27	62045	6.793	0.147	0.793	0.694379
1553	ARL13B_KAN416-36_1.tif:0008-0303	3.562	1276.86	453	3687	24.15	48.819	0.361	4548.45	174930	5.831	0.172	0.753	1.95774
1554	ARL13B_KAN416-36_1.tif:0009-0335	0.546	582.571	348	852	222.813	53.946	0.444	318.103	12234	4.034	0.248	0.618	0.136917
1555	ARL13B_KAN416-36_1.tif:0010-0346	2.548	1302.27	426	3091	109.204	55.901	0.459	3318.37	127622	4.304	0.232	0.754	1.42829
1556	ARL13B_KAN416-36_1.tif:0011-0406	1.924	1224.15	453	2698	25.798	65.472	0.566	2355.4	90587	3.759	0.266	0.809	1.01381
1557	ARL13B_KAN416-36_1.tif:0012-0489	2.938	1570.61	450	3743	53.354	78.969	0.362	4614.73	177479	6.198	0.161	0.756	1.98626
1558	ARL13B_KAN416-36_1.tif:0013-0657	1.716	1326.17	452	3785	187.206	105.958	0.414	2275.84	87527	4.928	0.203	0.684	0.979562
1559	ARL13B_KAN416-36_1.tif:0014-0694	1.092	875.119	512	2008	29.19	112.053	0.414	955.688	36755	5.512	0.181	0.73	0.411345
1560	ARL13B_KAN416-36_1.tif:0015-0700	2.522	1449.68	466	3256	163.786	112.889	0.352	3656.31	140619	6.144	0.163	0.74	1.57374
1561	ARL13B_KAN416-36_1.tif:0016-0704	2.288	1594.02	451	3854	67.655	113.656	0.364	3647.34	140274	5.747	0.174	0.71	1.56988
1562	ARL13B_KAN416-36_1.tif:0017-0768	2.886	1251.58	400	2788	11.47	123.865	0.262	3612.27	138925	8.03	0.125	0.673	1.55478
1563	ARL13B_KAN416-36_1.tif:0018-0869	1.43	673.091	460	1009	32.023	139.984	0.436	962.578	37020	4.438	0.225	0.759	0.414311
1564	ARL13B_KAN416-36_1.tif:0019-0914	2.314	903.719	344	2121	219.979	147.334	0.325	2091.33	80431	6.476	0.154	0.715	0.900146
1565	ARL13B_KAN416-36_1.tif:0020-0967	2.132	830.817	460	1643	10.043	155.897	0.303	1771.41	68127	6.954	0.144	0.672	0.762446
1566	ARL13B_KAN416-36_1.tif:0021-0999	2.418	1755.05	466	3742	55.821	161.202	0.46	4243.98	163220	4.283	0.233	0.747	1.82668
1567	ARL13B_KAN416-36_2.tif:0001-0026	1.768	1340.59	394	3744	205.651	4.494	0.458	2370.3	91160	3.175	0.315	0.701	1.02022
1568	ARL13B_KAN416-36_2.tif:0002-0123	2.652	1344.65	466	3814	16.422	19.9	0.403	3566.22	137154	4.849	0.206	0.703	1.53496
1569	ARL13B_KAN416-36_2.tif:0003-0118	1.664	1287.02	292	3406	143.48	19.08	0.395	2141.72	82369	3.951	0.253	0.621	0.921836
1570	ARL13B_KAN416-36_2.tif:0004-0127	2.444	972.851	455	2305	49.574	20.48	0.352	2377.79	91448	6.012	0.166	0.723	1.02344
1571	ARL13B_KAN416-36_2.tif:0005-0221	1.716	1000.47	167	2077	119.63	35.856	0.279	1716.91	66031	6.489	0.154	0.647	0.738988
1572	ARL13B_KAN416-36_2.tif:0006-0222	1.118	889.372	100	3337	86.361	35.758	0.595	994.378	38243	3.04	0.329	0.768	0.427998
1573	ARL13B_KAN416-36_2.tif:0007-0268	1.872	752.917	295	1271	11.055	43.412	0.318	1409.55	54210	3.252	0.308	0.511	0.606693
1574	ARL13B_KAN416-36_2.tif:0008-0278	1.976	841.592	465	1541	48.182	44.825	0.354	1663.09	63961	5.543	0.18	0.707	0.715822
1575	ARL13B_KAN416-36_2.tif:0009-0393	0.702	529.222	233	813	50.146	63.464	0.341	371.536	14289	3.963	0.252	0.587	0.159916
1576	ARL13B_KAN416-36_2.tif:0010-0451	2.522	1505.15	372	3675	124.991	72.836	0.476	3796.23	146000	3.845	0.26	0.743	1.63396
1577	ARL13B_KAN416-36_2.tif:0011-0507	2.236	2029.02	436	3722	87.78	81.956	0.579	4537.17	174496	2.388	0.419	0.738	1.95288
1578	ARL13B_KAN416-36_2.tif:0012-0549	1.664	1365.27	412	3099	173.56	88.632	0.428	2271.94	87377	5.114	0.196	0.736	0.977883
1579	ARL13B_KAN416-36_2.tif:0013-0662	1.612	1363.31	484	2974	145.208	106.813	0.446	2197.78	84525	4.816	0.208	0.77	0.945965
1580	ARL13B_KAN416-36_2.tif:0014-0842	1.196	788.261	206	2058	48.231	135.811	0.496	942.817	36260	4.266	0.234	0.814	0.405805
1581	ARL13B_KAN416-36_2.tif:0015-0856	2.652	792.696	188	2118	127.849	138.212	0.171	2102.36	80855	5.804	0.172	0.402	0.904892
1582	ARL13B_KAN416-36_2.tif:0016-0873	0.52	618.1	136	1398	47.803	140.868	0.553	321.431	12362	3.266	0.306	0.755	0.13835
1583	ARL13B_KAN416-36_2.tif:0017-0901	2.314	1810.35	494	3680	140.011	145.331	0.57	4189.4	161121	3.499	0.286	0.813	1.80319
1584	ARL13B_KAN416-36_2.tif:0018-0936	2.21	1199.33	402	2631	80.952	151.2	0.312	2650.68	101943	4.164	0.24	0.578	1.1409
1585	ARL13B_KAN416-36_2.tif:0019-0961	0.728	651.107	454	1105	28.489	154.921	0.217	474.035	18231	8.606	0.116	0.496	0.204033
1586	ARL13B_KAN416-36_2.tif:0020-1009	1.17	885.978	320	1590	219.8	162.714	0.539	1036.66	39869	4.063	0.246	0.811	0.446195
1587	ARL13B_KAN416-36_3.tif:0001-0185	1.066	547.683	382	766	133.348	30.03	0.384	583.865	22455	4.095	0.244	0.612	0.251306
1588	ARL13B_KAN416-36_3.tif:0002-0209	3.302	1061.42	317	3479	202.862	33.619	0.475	3505.04	134801	2.895	0.345	0.674	1.50863
1589	ARL13B_KAN416-36_3.tif:0003-0275	1.456	614.339	459	863	2.655	44.252	0.575	894.532	34403	3.052	0.328	0.855	0.385022
1590	ARL13B_KAN416-36_3.tif:0004-0329	2.028	1339.44	454	3770	174.198	53.051	0.505	2716.54	104476	3.637	0.275	0.746	1.16925
1591	ARL13B_KAN416-36_3.tif:0005-0342	1.924	1470.61	529	2635	144.288	55.121	0.386	2829.62	108825	5.845	0.171	0.763	1.21792
1592	ARL13B_KAN416-36_3.tif:0006-0373	4.134	1873.64	215	3742	164.139	59.831	0.415	7746.1	297909	3.203	0.312	0.743	3.33406
1593	ARL13B_KAN416-36_3.tif:0007-0441	2.678	1220.78	461	2577	30.034	71.118	0.589	3269.44	125740	3.226	0.31	0.789	1.40722
1594	ARL13B_KAN416-36_3.tif:0008-0569	1.794	725.087	461	1205	221.989	91.778	0.342	1300.88	50031	6.502	0.154	0.75	0.559924
1595	ARL13B_KAN416-36_3.tif:0009-0585	2.626	1374.23	452	3190	134.14	94.404	0.326	3608.94	138797	6.858	0.146	0.737	1.55335
1596	ARL13B_KAN416-36_3.tif:0010-0604	3.484	1156.74	461	2252	94.397	97.412	0.492	4030.32	155003	3.666	0.273	0.766	1.73472
1597	ARL13B_KAN416-36_3.tif:0011-0697	3.276	833.452	458	1358	74.216	112.286	0.335	2730.55	105015	5.835	0.171	0.661	1.17528
1598	ARL13B_KAN416-36_3.tif:0012-0808	2.236	832.512	457	1897	146.644	130.62	0.263	1861.61	71596	7.235	0.138	0.562	0.801269
1599	ARL13B_KAN416-36_3.tif:0013-0874	1.612	814.774	312	1633	70.568	141.094	0.538	1313.49	50516	3.396	0.294	0.743	0.565352
1600	ARL13B_KAN416-36_3.tif:0014-0878	2.314	1660.51	452	3684	213.433	141.647	0.53	3842.64	147785	3.975	0.252	0.795	1.65394
1601	ARL13B_KAN416-36_3.tif:0015-0885	1.196	1024.22	459	2089	128.975	142.787	0.482	1225.04	47114	3.929	0.255	0.708	0.527278
1602	ARL13B_KAN416-36_3.tif:0016-0956	0.728	650.786	455	1009	119.768	154.155	0.381	473.801	18222	5.744	0.174	0.659	0.203932
1603	ARL13B_KAN416-36_3.tif:0017-0956	2.002	1070.88	317	2610	206.286	154.135	0.313	2144.04	82458	7.384	0.135	0.774	0.922832
1604	ARL13B_KAN416-36_3.tif:0018-0988	1.924	1709.11	476	3792	206.847	159.407	0.495	3288.52	126474	4.231	0.236	0.809	1.41544
1605	ARL13B_KAN416-36_4.tif:0001-0007	1.274	1119.35	456	2991	46.777	1.269	0.474	1426.13	54848	3.632	0.275	0.667	0.613833
1606	ARL13B_KAN416-36_4.tif:0002-0059	1.794	1993.65	461	3781	72.961	9.538	0.517	3576.83	137562	3.934	0.254	0.821	1.53953
1607	ARL13B_KAN416-36_4.tif:0003-0138	1.274	954.347	482	1809	204.305	22.333	0.45	1215.91	46763	4.341	0.23	0.772	0.52335
1608	ARL13B_KAN416-36_4.tif:0004-0191	2.47	1259.59	334	3798	39.252	30.822	0.337	3111.37	119661	6.777	0.148	0.76	1.33919
1609	ARL13B_KAN416-36_4.tif:0005-0371	1.898	1517.66	454	3024	3.462	59.893	0.582	2880.69	110789	3.128	0.32	0.798	1.2399
1610	ARL13B_KAN416-36_4.tif:0006-0438	2.184	1215.73	438	3284	202.075	70.685	0.43	2655.31	102121	5.507	0.182	0.844	1.14289
1611	ARL13B_KAN416-36_4.tif:0007-0502	1.482	949.193	403	2216	132.767	81.017	0.415	1406.79	54104	5.336	0.187	0.74	0.605507
1612	ARL13B_KAN416-36_4.tif:0008-0548	1.924	976.608	458	1788	41.912	88.548	0.356	1879.11	72269	5.343	0.187	0.658	0.808801
1613	ARL13B_KAN416-36_4.tif:0009-0577	2.21	1529.4	450	3712	146.782	93.122	0.486	3380.18	129999	4.056	0.247	0.733	1.45489
1614	ARL13B_KAN416-36_4.tif:0010-0624	2.132	1866.9	460	3712	94.933	100.594	0.567	3980.48	153086	3.162	0.316	0.796	1.71327
1615	ARL13B_KAN416-36_4.tif:0011-0778	3.328	947.07	451	1607	13.341	125.308	0.462	3152.04	121225	3.083	0.324	0.679	1.35669
1616	ARL13B_KAN416-36_4.tif:0012-0848	2.08	1424.35	305	3743	110.954	136.659	0.518	2962.83	113948	3.708	0.27	0.796	1.27525
1617	ARL13B_KAN416-36_4.tif:0013-0862	1.794	758.638	457	1558	215.312	139.048	0.396	1361.08	52346	5.407	0.185	0.676	0.585832
1618	ARL13B_KAN416-36_4.tif:0014-0888	1.43	1051.93	450	2056	24.06	143.279	0.419	1504.35	57856	5.049	0.198	0.733	0.647497
1619	ARL13B_KAN416-36_5.tif:0001-0043	2.288	1360.61	450	3031	137.757	6.93	0.549	3113.27	119734	3.741	0.267	0.815	1.34001
1620	ARL13B_KAN416-36_5.tif:0002-0235	1.82	1175.06	305	2739	160.617	37.926	0.515	2138.73	82254	4.337	0.231	0.886	0.920549
1621	ARL13B_KAN416-36_5.tif:0003-0256	3.406	1112.19	416	2851	167.059	41.309	0.261	3788.35	145697	7.864	0.127	0.686	1.63057
1622	ARL13B_KAN416-36_5.tif:0004-0339	2.314	1320.12	458	3445	104.346	54.643	0.334	3054.95	117491	6.29	0.159	0.672	1.3149
1623	ARL13B_KAN416-36_5.tif:0005-0417	0.78	741.733	476	1109	66.559	67.3	0.488	578.587	22252	4.092	0.244	0.759	0.249034
1624	ARL13B_KAN416-36_5.tif:0006-0455	1.794	1794.43	470	3771	219.21	73.496	0.534	3219.41	123816	3.768	0.265	0.831	1.38569
1625	ARL13B_KAN416-36_5.tif:0007-0550	2.574	1220.04	461	2670	39.856	88.595	0.329	3140.57	120784	6.864	0.146	0.702	1.35176
1626	ARL13B_KAN416-36_5.tif:0008-0601	1.534	1221.68	293	2652	147.417	96.937	0.447	1874.17	72079	4.789	0.209	0.771	0.806675
1627	ARL13B_KAN416-36_5.tif:0009-0636	2.496	1604.96	470	3174	92.591	102.683	0.392	4006.22	154076	5.417	0.185	0.797	1.72435
1628	ARL13B_KAN416-36_5.tif:0010-0701	1.508	517.534	124	1193	65.518	113.031	0.533	780.489	30017	1.865	0.536	0.699	0.335936
1629	ARL13B_KAN416-36_5.tif:0011-0716	2.522	1400.83	360	3556	167.069	115.469	0.407	3533.09	135880	5.902	0.169	0.886	1.52071
1630	ARL13B_KAN416-36_5.tif:0012-0776	1.534	1067.41	470	2637	202.657	125.153	0.399	1637.5	62977	4.272	0.234	0.638	0.704809
1631	ARL13B_KAN416-36_5.tif:0013-0816	2.288	1595.84	464	3738	91.885	131.479	0.479	3651.5	140434	3.993	0.25	0.746	1.57167
1632	ARL13B_KAN416-36_5.tif:0014-0887	2.678	1380.99	470	2674	198.493	143.062	0.367	3698.51	142242	5.396	0.185	0.73	1.59191
1633	ARL13B_KAN416-36_6.tif:0001-0014	1.872	1262.38	458	2606	189.184	2.269	0.398	2363.31	90891	4.515	0.221	0.702	1.01721
1634	ARL13B_KAN416-36_6.tif:0002-0017	1.742	1296.08	409	2912	207.864	2.752	0.597	2257.9	86837	3.364	0.297	0.838	0.971839
1635	ARL13B_KAN416-36_6.tif:0003-0037	2.47	1350.47	465	3620	138.766	5.918	0.566	3335.87	128295	3.516	0.284	0.782	1.43582
1636	ARL13B_KAN416-36_6.tif:0004-0171	1.95	1402.64	255	3794	44.156	27.764	0.525	2735.31	105198	3.179	0.315	0.773	1.17733
1637	ARL13B_KAN416-36_6.tif:0005-0182	2.652	792.333	451	1283	157.985	29.513	0.286	2101.39	80818	6.859	0.146	0.624	0.904478
1638	ARL13B_KAN416-36_6.tif:0006-0310	0.676	683.923	301	1273	109.39	50.074	0.491	462.36	17782	3.504	0.285	0.634	0.199008
1639	ARL13B_KAN416-36_6.tif:0007-0330	2.73	1137.7	466	3001	195.743	53.373	0.423	3106.12	119459	4.808	0.208	0.732	1.33693
1640	ARL13B_KAN416-36_6.tif:0008-0450	3.068	908.364	453	2185	103.195	72.464	0.395	2787.03	107187	5.143	0.194	0.713	1.19959
1641	ARL13B_KAN416-36_6.tif:0009-0464	3.848	978.547	453	2320	45.819	74.909	0.423	3765.68	144825	5.174	0.193	0.705	1.62081
1642	ARL13B_KAN416-36_6.tif:0010-0523	1.69	1125.03	452	2544	172.144	84.365	0.442	1901.42	73127	4.771	0.21	0.734	0.818403
1643	ARL13B_KAN416-36_6.tif:0011-0698	2.574	1027.57	458	2159	86.998	112.529	0.42	2645.11	101729	5.203	0.192	0.728	1.1385
1644	ARL13B_KAN416-36_6.tif:0012-0790	2.704	1163.11	333	2825	190.942	127.325	0.42	3145.23	120963	4.802	0.208	0.782	1.35376
1645	ARL13B_KAN416-36_6.tif:0013-0916	2.73	1239.65	334	3230	169.643	147.996	0.357	3384.44	130163	4.358	0.229	0.627	1.45672
										96887.1				1.08432
1646	ARL13B_KAN416-37_1.tif:0001-0021	3.016	1772.78	426	3712	128.882	3.428	0.521	5347.04	205643	3.734	0.268	0.803	2.30146
1647	ARL13B_KAN416-37_1.tif:0002-0060	3.796	1515.02	335	3504	44.488	9.697	0.513	5751.36	221193	4.187	0.239	0.874	2.47549
1648	ARL13B_KAN416-37_1.tif:0003-0081	3.354	1282.89	450	3590	164.866	13.031	0.348	4303.08	165493	6.824	0.147	0.779	1.85212
1649	ARL13B_KAN416-37_1.tif:0004-0109	3.562	1224.47	331	2437	149.724	17.884	0.268	4361.81	167752	4.028	0.248	0.492	1.8774
1650	ARL13B_KAN416-37_1.tif:0005-0175	3.016	1185.84	455	2368	97.843	28.184	0.507	3576.7	137557	4.066	0.246	0.795	1.53947
1651	ARL13B_KAN416-37_1.tif:0006-0279	1.482	1066.19	287	3159	163.625	45.047	0.399	1580.19	60773	5.112	0.196	0.726	0.680143
1652	ARL13B_KAN416-37_1.tif:0007-0314	1.872	1376.81	475	3109	50.057	50.688	0.555	2577.53	99130	3.487	0.287	0.814	1.10942
1653	ARL13B_KAN416-37_1.tif:0008-0369	1.95	1497.6	460	2957	194.518	59.53	0.551	2920.5	112320	4.055	0.247	0.833	1.25703
1654	ARL13B_KAN416-37_1.tif:0009-0377	2.886	989.144	458	1769	85.793	60.952	0.42	2854.84	109795	4.696	0.213	0.779	1.22877
1655	ARL13B_KAN416-37_1.tif:0010-0549	2.314	1154.95	442	2478	30.017	88.681	0.391	2672.73	102791	4.225	0.237	0.667	1.15039
1656	ARL13B_KAN416-37_1.tif:0011-0562	2.652	2156.43	467	3712	151.066	90.695	0.598	5719.2	219956	2.925	0.342	0.829	2.46165
1657	ARL13B_KAN416-37_1.tif:0012-0571	2.028	1060.86	398	2784	183.478	91.95	0.26	2151.55	82747	7.763	0.129	0.612	0.926066
1658	ARL13B_KAN416-37_1.tif:0013-0602	4.264	1624.03	452	3653	63.464	97.135	0.372	6925.28	266341	5.966	0.168	0.792	2.98076
1659	ARL13B_KAN416-37_1.tif:0014-0632	3.536	1104.96	454	2613	25.671	101.87	0.37	3907.39	150275	6.349	0.157	0.735	1.68181
1660	ARL13B_KAN416-37_1.tif:0015-0636	2.782	1134.84	455	2951	114.922	102.346	0.363	3157.32	121428	3.646	0.274	0.605	1.35897
1661	ARL13B_KAN416-37_1.tif:0016-0649	2.808	1384.42	156	3507	204.156	104.614	0.586	3887.68	149517	3.664	0.273	0.931	1.67332
1662	ARL13B_KAN416-37_1.tif:0017-0674	2.782	1693.76	461	3826	147.85	108.813	0.474	4712.32	181232	4.529	0.221	0.743	2.02826
1663	ARL13B_KAN416-37_1.tif:0018-0782	0.78	750.6	151	1475	87.209	126.232	0.476	585.503	22518	2.502	0.4	0.69	0.252011
1664	ARL13B_KAN416-37_1.tif:0019-0858	3.094	1113.05	462	2960	50.248	138.338	0.345	3443.99	132453	6.141	0.163	0.702	1.48235
1665	ARL13B_KAN416-37_1.tif:0020-0878	2.262	1445.74	453	3302	14.486	141.552	0.549	3270.45	125779	3.453	0.29	0.821	1.40766
1666	ARL13B_KAN416-37_1.tif:0021-0882	0.676	583.962	453	850	171.403	142.136	0.549	394.782	15183	1.822	0.549	0.684	0.169921
1667	ARL13B_KAN416-37_1.tif:0022-0920	1.924	1285.85	270	3447	110.879	148.411	0.524	2474.13	95153	4.068	0.246	0.886	1.06491
1668	ARL13B_KAN416-37_1.tif:0023-0982	1.248	903.333	466	1780	210.539	158.455	0.357	1127.43	43360	6.302	0.159	0.711	0.485265
1669	ARL13B_KAN416-37_2.tif:0001-0012	1.846	1457.37	464	3588	205.713	1.959	0.501	2690.46	103473	4.013	0.249	0.724	1.15802
1670	ARL13B_KAN416-37_2.tif:0002-0183	2.418	1646.51	462	3713	152.531	29.576	0.53	3981.49	153125	4.153	0.241	0.845	1.7137
1671	ARL13B_KAN416-37_2.tif:0003-0194	2.236	1278.56	230	3589	113.809	31.166	0.485	2859.03	109956	4.325	0.231	0.751	1.23058
1672	ARL13B_KAN416-37_2.tif:0004-0215	2.808	1484.97	438	3752	189.561	34.606	0.388	4170.05	160377	4.728	0.212	0.675	1.79486
1673	ARL13B_KAN416-37_2.tif:0005-0231	2.574	1473.95	265	3763	50.609	37.22	0.502	3794.17	145921	3.449	0.29	0.742	1.63308
1674	ARL13B_KAN416-37_2.tif:0006-0264	2.678	1182.8	455	3374	88.19	42.596	0.425	3167.72	121828	4.97	0.201	0.802	1.36344
1675	ARL13B_KAN416-37_2.tif:0007-0343	2.314	903.854	223	1844	70.317	55.244	0.317	2091.64	80443	4.181	0.239	0.56	0.900281
1676	ARL13B_KAN416-37_2.tif:0008-0402	2.132	1830.65	458	3749	168.453	64.929	0.499	3903.17	150113	4.018	0.249	0.788	1.68
1677	ARL13B_KAN416-37_2.tif:0009-0481	2.99	967.07	403	2078	94.963	77.577	0.312	2891.71	111213	5.864	0.171	0.732	1.24464
1678	ARL13B_KAN416-37_2.tif:0010-0490	3.042	1772.8	216	3765	119.98	79.064	0.502	5393.19	207418	4.609	0.217	0.903	2.32133
1679	ARL13B_KAN416-37_2.tif:0011-0554	3.406	1148.28	458	2210	61.814	89.555	0.397	3911.29	150425	4.829	0.207	0.766	1.68349
1680	ARL13B_KAN416-37_2.tif:0012-0564	2.652	1571.18	442	3747	216.937	91.04	0.42	4167.01	160260	5.212	0.192	0.816	1.79356
1681	ARL13B_KAN416-37_2.tif:0013-0625	2.418	1409.67	460	2816	14.498	100.877	0.48	3408.78	131099	4.277	0.234	0.782	1.4672
1682	ARL13B_KAN416-37_2.tif:0014-0685	2.366	1780.65	466	3753	112.084	110.409	0.465	4213.27	162039	4.159	0.24	0.731	1.81347
1683	ARL13B_KAN416-37_2.tif:0015-0745	2.366	1281.62	112	2611	35.017	120.178	0.436	3032.49	116627	4.343	0.23	0.791	1.30524
1684	ARL13B_KAN416-37_2.tif:0016-0750	2.262	2070.11	328	3780	209.476	120.851	0.599	4682.88	180100	3.343	0.299	0.916	2.0156
1685	ARL13B_KAN416-37_2.tif:0017-0900	2.782	1609.03	465	3820	48.525	145.337	0.329	4476.59	172166	5.906	0.169	0.658	1.9268
1686	ARL13B_KAN416-37_2.tif:0018-0985	1.872	1974.75	455	3777	135.089	158.914	0.52	3696.95	142182	4.051	0.247	0.804	1.59123
1687	ARL13B_KAN416-37_3.tif:0001-0101	3.614	1528.11	471	3759	151.41	15.985	0.268	5522.91	212407	4.785	0.209	0.558	2.37716
1688	ARL13B_KAN416-37_3.tif:0002-0136	2.6	1559.48	451	3678	142.59	21.951	0.4	4054.89	155948	5.588	0.179	0.714	1.7453
1689	ARL13B_KAN416-37_3.tif:0003-0176	4.498	1079.1	450	2117	81.808	28.219	0.595	4854.1	186685	2.939	0.34	0.822	2.08929
1690	ARL13B_KAN416-37_3.tif:0004-0228	4.108	773.31	327	1425	47.409	36.82	0.451	3176.95	122183	4.954	0.202	0.89	1.36742
1691	ARL13B_KAN416-37_3.tif:0005-0334	3.302	1348.71	450	3014	208.711	53.914	0.479	4453.7	171286	4.278	0.234	0.841	1.91695
1692	ARL13B_KAN416-37_3.tif:0006-0440	2.86	1575.45	453	3653	167.792	70.786	0.496	4506.07	173300	3.347	0.299	0.714	1.93949
1693	ARL13B_KAN416-37_3.tif:0007-0473	1.768	1523.78	458	3762	123.304	76.3	0.542	2694.2	103617	3.898	0.257	0.773	1.15963
1694	ARL13B_KAN416-37_3.tif:0008-0521	1.092	1132.86	463	2697	43.088	84.034	0.449	1237.15	47580	4.871	0.205	0.73	0.532493
1695	ARL13B_KAN416-37_3.tif:0009-0575	3.9	1389.01	465	2669	180.608	92.792	0.423	5417.48	208352	5.032	0.199	0.817	2.33178
1696	ARL13B_KAN416-37_3.tif:0010-0596	3.12	1416.04	377	3779	220.511	96.223	0.457	4418.32	169925	3.782	0.264	0.741	1.90172
1697	ARL13B_KAN416-37_3.tif:0011-0636	3.25	967.64	452	1810	12.373	102.583	0.448	3145.02	120955	4.961	0.202	0.847	1.35367
1698	ARL13B_KAN416-37_3.tif:0012-0847	1.794	678.986	451	1061	61.529	136.603	0.281	1218.17	46850	7.187	0.139	0.642	0.524323
1699	ARL13B_KAN416-37_3.tif:0013-0864	2.86	1415.99	115	3259	42.632	139.345	0.362	4049.98	155759	6.265	0.16	0.78	1.74318
1700	ARL13B_KAN416-37_3.tif:0014-0873	2.6	1773.57	474	3778	33.919	140.712	0.46	4611.56	177357	4.427	0.226	0.755	1.9849
1701	ARL13B_KAN416-37_3.tif:0015-0911	3.38	1680.75	457	3800	159.753	146.806	0.434	5681.26	218497	4.882	0.205	0.833	2.44532
1702	ARL13B_KAN416-37_3.tif:0016-0929	2.548	974.061	454	2523	103.995	149.647	0.378	2482.06	95458	5.218	0.192	0.69	1.06832
1703	ARL13B_KAN416-37_3.tif:0017-0950	2.184	904.893	423	1610	171.317	153.268	0.42	1976.4	76011	5.249	0.191	0.866	0.85068
1704	ARL13B_KAN416-37_3.tif:0018-0958	2.886	1125.38	463	2711	124.253	154.494	0.459	3248.04	124917	4.582	0.218	0.776	1.39801
1705	ARL13B_KAN416-37_3.tif:0019-0992	2.47	1457.61	451	3315	201.4	159.997	0.466	3600.51	138473	4.503	0.222	0.837	1.54973
1706	ARL13B_KAN416-37_4.tif:0001-0039	2.496	1783.97	470	3723	60.296	6.19	0.549	4453.05	171261	3.332	0.3	0.81	1.91667
1707	ARL13B_KAN416-37_4.tif:0002-0169	2.418	1440.05	451	3710	36.338	27.053	0.491	3482.26	133925	3.57	0.28	0.729	1.49883
1708	ARL13B_KAN416-37_4.tif:0003-0187	1.248	783.188	450	1580	208.909	30.258	0.334	977.477	37593	5.81	0.172	0.623	0.420723
1709	ARL13B_KAN416-37_4.tif:0004-0250	3.224	2005.74	450	3776	146.606	40.21	0.424	6466.9	248712	5.095	0.196	0.797	2.78347
1710	ARL13B_KAN416-37_4.tif:0005-0294	2.444	1509.96	456	3757	189.232	47.474	0.379	3690.56	141936	5.519	0.181	0.694	1.58848
1711	ARL13B_KAN416-37_4.tif:0006-0324	2.522	1999.44	454	3726	114.879	52.219	0.469	5042.9	193946	4.606	0.217	0.847	2.17055
1712	ARL13B_KAN416-37_4.tif:0007-0442	2.392	1588.99	487	3606	131.31	71.353	0.357	3801.09	146187	6.309	0.159	0.716	1.63606
1713	ARL13B_KAN416-37_4.tif:0008-0499	2.73	1156.03	452	2535	8.486	80.441	0.286	3156.15	121383	7.529	0.133	0.705	1.35846
1714	ARL13B_KAN416-37_4.tif:0009-0513	2.444	1840.9	452	3662	64.673	82.656	0.397	4499.44	173045	5.393	0.185	0.793	1.93664
1715	ARL13B_KAN416-37_4.tif:0010-0568	2.366	695.429	335	1255	36.715	91.679	0.383	1645.48	63284	5.764	0.173	0.746	0.708245
1716	ARL13B_KAN416-37_4.tif:0011-0607	2.496	2184.26	451	3695	97.032	97.948	0.523	5452.24	209689	3.542	0.282	0.817	2.34674
1717	ARL13B_KAN416-37_4.tif:0012-0678	2.21	1567.93	459	3773	163.645	109.277	0.545	3465.33	133274	3.29	0.304	0.776	1.49154
1718	ARL13B_KAN416-37_4.tif:0013-0721	1.534	952.525	463	1620	188.606	116.293	0.47	1461.26	56199	4.494	0.223	0.756	0.628953
1719	ARL13B_KAN416-37_4.tif:0014-0782	2.704	1919.98	465	3785	30.2	126.066	0.44	5191.94	199678	4.655	0.215	0.768	2.2347
1720	ARL13B_KAN416-37_4.tif:0015-0860	2.548	1435.03	198	3810	121.8	138.627	0.36	3656.68	140633	3.895	0.257	0.649	1.5739
1721	ARL13B_KAN416-37_4.tif:0016-0915	1.014	666.462	321	1347	187.428	147.256	0.206	675.833	25992	8.494	0.118	0.561	0.29089
1722	ARL13B_KAN416-37_5.tif:0001-0016	2.808	1591.28	248	3788	77.603	2.592	0.456	4468.58	171858	4.202	0.238	0.771	1.92335
1723	ARL13B_KAN416-37_5.tif:0002-0032	2.106	1040.03	218	2198	6.461	5.193	0.309	2190.42	84242	3.433	0.291	0.545	0.942797
1724	ARL13B_KAN416-37_5.tif:0003-0249	2.106	1531.83	474	3780	95.369	40.021	0.443	3226.22	124078	4.257	0.235	0.72	1.38862
1725	ARL13B_KAN416-37_5.tif:0004-0286	2.21	1226.09	452	2694	186.639	46.016	0.377	2709.83	104218	5.802	0.172	0.7	1.16636
1726	ARL13B_KAN416-37_5.tif:0005-0397	1.742	1064.22	453	2098	27.958	64.126	0.316	1853.99	71303	6.944	0.144	0.638	0.79799
1727	ARL13B_KAN416-37_5.tif:0006-0459	0.832	832.344	470	1419	152.522	74.115	0.471	692.552	26635	4.524	0.221	0.719	0.298087
1728	ARL13B_KAN416-37_5.tif:0007-0603	2.548	876.224	451	1856	112.961	97.158	0.379	2232.75	85870	5.899	0.17	0.76	0.961017
1729	ARL13B_KAN416-37_5.tif:0008-0631	2.158	1827.52	453	3818	29.529	101.757	0.434	3944.02	151684	5.244	0.191	0.79	1.69758
1730	ARL13B_KAN416-37_5.tif:0009-0702	3.042	1710.73	268	3691	11.489	113.12	0.411	5204.37	200156	4.795	0.209	0.745	2.24005
1731	ARL13B_KAN416-37_5.tif:0010-0924	1.872	2199.19	472	3745	184.168	148.935	0.52	4117.14	158342	3.849	0.26	0.828	1.77209
1732	ARL13B_KAN416-37_5.tif:0011-0939	2.496	1015.31	369	2248	68.056	151.247	0.199	2534.37	97470	6.048	0.165	0.468	1.09084
1733	ARL13B_KAN416-37_5.tif:0012-0997	2.678	1559.47	476	3728	105.969	160.747	0.453	4176.5	160625	4.292	0.233	0.777	1.79764
1734	ARL13B_KAN416-37_5.tif:0013-1000	0.91	878.914	464	1872	133.361	161.28	0.515	799.86	30762	3.631	0.275	0.729	0.344274
1735	ARL13B_KAN416-37_6.tif:0001-0048	3.588	951.703	463	1566	51.561	7.8	0.508	3414.92	131335	3.955	0.253	0.847	1.46984
1736	ARL13B_KAN416-37_6.tif:0002-0061	2.782	1110.9	348	2749	221.668	9.805	0.396	3090.7	118866	5.178	0.193	0.723	1.33029
1737	ARL13B_KAN416-37_6.tif:0003-0177	3.094	1632.04	487	3510	133.56	28.518	0.589	5049.84	194213	3.41	0.293	0.891	2.17354
1738	ARL13B_KAN416-37_6.tif:0004-0206	1.014	677.103	457	1064	12.15	33.166	0.543	686.623	26407	3.645	0.274	0.757	0.295535
1739	ARL13B_KAN416-37_6.tif:0005-0337	2.288	794.807	2	1922	143.655	54.521	0.341	1818.63	69943	3.234	0.309	0.583	0.78277
1740	ARL13B_KAN416-37_6.tif:0006-0458	3.536	1238.12	455	3179	58.888	73.926	0.417	4378.27	168385	5.197	0.192	0.777	1.88449
1741	ARL13B_KAN416-37_6.tif:0007-0537	2.938	2049.27	454	3801	89.878	86.558	0.455	6021.13	231568	4.91	0.204	0.785	2.5916
1742	ARL13B_KAN416-37_6.tif:0008-0673	2.6	977.53	493	1878	197.096	108.678	0.218	2541.73	97753	6.577	0.152	0.533	1.09401
1743	ARL13B_KAN416-37_6.tif:0009-0692	2.938	1646.05	459	3604	30.831	111.653	0.473	4836.4	186004	3.544	0.282	0.708	2.08167
1744	ARL13B_KAN416-37_6.tif:0010-0711	1.612	825.694	455	1791	171.614	114.706	0.275	1331.1	51193	8.431	0.119	0.67	0.572928
1745	ARL13B_KAN416-37_6.tif:0011-0760	1.378	644.358	330	1241	148.102	122.564	0.223	887.979	34151	7.705	0.13	0.522	0.382202
1746	ARL13B_KAN416-37_6.tif:0012-0833	2.99	987.13	313	2125	187.292	134.243	0.254	2951.7	113520	5.035	0.199	0.541	1.27046
1747	ARL13B_KAN416-37_6.tif:0013-0923	2.47	1652.18	286	3179	182.38	148.967	0.475	4081.13	156957	5.106	0.196	0.909	1.75659
1748	ARL13B_KAN416-37_6.tif:0014-1016	1.274	698.653	188	1273	80.465	163.726	0.382	890.138	34234	4.707	0.212	0.705	0.383131
										131371				1.47024
1749	ARL13B_KAN416-38_1.tif:0001-0015	1.274	928.735	463	1880	159.82	2.634	0.367	1183.28	45508	4.619	0.217	0.681	0.509304
1750	ARL13B_KAN416-38_1.tif:0002-0051	2.236	1160.45	451	2222	99.156	8.072	0.566	2594.93	99799	3.229	0.31	0.839	1.1169
1751	ARL13B_KAN416-38_1.tif:0003-0062	2.418	1460.62	454	3307	110.972	10.023	0.435	3532	135838	4.848	0.206	0.721	1.52024
1752	ARL13B_KAN416-38_1.tif:0004-0127	3.172	1103.55	454	2420	138.667	20.429	0.405	3500.67	134633	5.329	0.188	0.78	1.50675
1753	ARL13B_KAN416-38_1.tif:0005-0216	2.236	1100.86	421	2234	75.437	34.944	0.283	2461.67	94674	7.006	0.143	0.708	1.05955
1754	ARL13B_KAN416-38_1.tif:0006-0232	3.744	1327.02	453	3373	161.056	37.356	0.478	4968.66	191091	4.439	0.225	0.807	2.1386
1755	ARL13B_KAN416-38_1.tif:0007-0290	2.236	829.64	23	2087	13.316	46.731	0.572	1855.19	71349	2.014	0.497	0.745	0.798505
1756	ARL13B_KAN416-38_1.tif:0008-0307	2.366	933.088	452	2266	90.547	49.786	0.378	2207.82	84911	4.608	0.217	0.657	0.950285
1757	ARL13B_KAN416-38_1.tif:0009-0370	2.054	1562.28	458	3821	21.041	59.627	0.413	3209.11	123420	5.498	0.182	0.742	1.38126
1758	ARL13B_KAN416-38_1.tif:0010-0394	2.392	1086.8	370	2461	13.882	63.438	0.429	2599.79	99986	3.958	0.253	0.674	1.119
1759	ARL13B_KAN416-38_1.tif:0011-0425	2.808	937.574	455	2024	57.632	68.455	0.3	2632.87	101258	7.29	0.137	0.653	1.13323
1760	ARL13B_KAN416-38_1.tif:0012-0436	0.65	585.92	322	848	177.494	70.179	0.36	380.871	14648	5.127	0.195	0.588	0.163934
1761	ARL13B_KAN416-38_1.tif:0013-0470	1.43	950.345	479	1627	215.171	75.842	0.426	1359.08	52269	4.943	0.202	0.748	0.58497
1762	ARL13B_KAN416-38_1.tif:0014-0479	0.728	852.143	450	1408	212.608	77.245	0.519	620.397	23860	3.253	0.307	0.727	0.26703
1763	ARL13B_KAN416-38_1.tif:0015-0553	1.43	1343.13	453	2733	133.379	89.193	0.426	1920.79	73872	4.904	0.204	0.728	0.826741
1764	ARL13B_KAN416-38_1.tif:0016-0556	2.236	947.721	383	1662	18.992	89.648	0.497	2119.23	81504	3.177	0.315	0.72	0.912155
1765	ARL13B_KAN416-38_1.tif:0017-0600	2.314	1436.82	468	3644	203.386	96.836	0.381	3325	127877	5.631	0.178	0.69	1.43114
1766	ARL13B_KAN416-38_1.tif:0018-0651	1.924	1374.07	484	2889	70.791	104.982	0.469	2643.86	101681	4.46	0.224	0.715	1.13797
1767	ARL13B_KAN416-38_1.tif:0019-0742	2.184	895.214	378	2632	136.506	119.692	0.43	1955.27	75198	5.559	0.18	0.796	0.841581
1768	ARL13B_KAN416-38_1.tif:0020-0748	1.69	1122.23	292	3261	38.245	120.671	0.59	1896.68	72945	2.681	0.373	0.783	0.816367
1769	ARL13B_KAN416-38_1.tif:0021-0778	0.91	883.114	482	1610	223.513	125.75	0.555	803.682	30909	2.487	0.402	0.753	0.345919
1770	ARL13B_KAN416-38_1.tif:0022-0840	2.444	1257.24	451	2805	51.207	135.428	0.554	3072.89	118181	3.589	0.279	0.787	1.32263
1771	ARL13B_KAN416-38_1.tif:0023-0912	1.898	932.274	360	2266	4.602	147.019	0.454	1769.56	68056	4.587	0.218	0.82	0.761651
1772	ARL13B_KAN416-38_1.tif:0024-0962	1.898	951.603	453	2547	114.727	155.252	0.424	1806.25	69467	4.553	0.22	0.695	0.777442
1773	ARL13B_KAN416-38_1.tif:0025-0991	2.288	1823.01	450	3838	77.492	159.834	0.431	4171.3	160425	5.378	0.186	0.765	1.7954
1774	ARL13B_KAN416-38_2.tif:0001-0008	0.78	779.767	453	1718	1.091	1.301	0.479	608.255	23393	4.229	0.236	0.698	0.261804
1775	ARL13B_KAN416-38_2.tif:0002-0024	1.69	1185.97	476	2806	15.318	3.978	0.433	2004.41	77088	3.844	0.26	0.691	0.862733
1776	ARL13B_KAN416-38_2.tif:0003-0032	1.924	932.473	281	2136	104.022	5.208	0.379	1794.19	69003	6.241	0.16	0.846	0.77225
1777	ARL13B_KAN416-38_2.tif:0004-0128	2.496	858.281	464	1485	207.06	20.517	0.538	2142.4	82395	3.313	0.302	0.817	0.922127
1778	ARL13B_KAN416-38_2.tif:0005-0189	1.976	1272.13	452	2811	99.769	30.519	0.42	2513.88	96682	4.787	0.209	0.749	1.08202
1779	ARL13B_KAN416-38_2.tif:0006-0267	2.158	1929.06	466	3828	166.574	43.055	0.465	4163.16	160112	4.577	0.218	0.761	1.7919
1780	ARL13B_KAN416-38_2.tif:0007-0291	1.976	1448.05	452	3795	174.006	46.968	0.547	2861.52	110052	3.461	0.289	0.779	1.23165
1781	ARL13B_KAN416-38_2.tif:0008-0308	2.834	1418.19	455	3743	100.792	49.916	0.348	4019.4	154583	5.014	0.199	0.626	1.73002
1782	ARL13B_KAN416-38_2.tif:0009-0321	2.236	833.465	364	1699	204.6	51.778	0.504	1863.74	71678	2.846	0.351	0.677	0.802187
1783	ARL13B_KAN416-38_2.tif:0010-0337	3.172	1788.3	455	3688	112.426	54.512	0.543	5672.81	218172	3.426	0.292	0.816	2.44168
1784	ARL13B_KAN416-38_2.tif:0011-0425	2.21	1940.73	468	3716	207.23	68.471	0.566	4289.27	164962	3.513	0.285	0.846	1.84618
1785	ARL13B_KAN416-38_2.tif:0012-0531	3.77	1262.65	454	2777	148.335	85.612	0.325	4760.5	183085	7.201	0.139	0.763	2.049
1786	ARL13B_KAN416-38_2.tif:0013-0637	1.716	1055.79	453	2517	163.361	102.748	0.446	1811.84	69682	4.574	0.219	0.725	0.779849
1787	ARL13B_KAN416-38_2.tif:0014-0650	1.976	829.447	457	1630	219.591	104.866	0.268	1639.09	63038	9.233	0.108	0.664	0.705492
1788	ARL13B_KAN416-38_2.tif:0015-0673	2.392	910.543	393	1714	2.41	108.57	0.399	2178.15	83770	5.315	0.188	0.733	0.937515
1789	ARL13B_KAN416-38_2.tif:0016-0689	2.08	1194.89	457	3075	22.484	111.172	0.474	2485.52	95591	4.605	0.217	0.788	1.06981
1790	ARL13B_KAN416-38_2.tif:0017-0865	1.3	868.36	232	1712	222.783	139.594	0.497	1128.94	43418	3.796	0.263	0.769	0.485914
1791	ARL13B_KAN416-38_2.tif:0018-0924	2.08	1890.78	462	3760	108.175	149.027	0.429	3933.05	151262	4.82	0.207	0.8	1.69285
1792	ARL13B_KAN416-38_2.tif:0019-0941	2.028	1015.01	429	3265	211.804	151.786	0.349	2058.57	79171	5.142	0.194	0.627	0.886045
1793	ARL13B_KAN416-38_2.tif:0020-0968	2.652	1505.66	394	3787	90.792	156.014	0.512	3993.24	153577	4.085	0.245	0.813	1.71876
1794	ARL13B_KAN416-38_2.tif:0021-0998	1.924	1681.49	432	3811	117.545	160.906	0.557	3235.38	124430	2.879	0.347	0.744	1.39256
1795	ARL13B_KAN416-38_3.tif:0001-0092	2.054	1305.39	451	2484	86.015	14.742	0.305	2681.44	103126	6.992	0.143	0.702	1.15414
1796	ARL13B_KAN416-38_3.tif:0002-0112	1.586	1031.28	125	2296	154.825	18.03	0.537	1635.71	62908	2.681	0.373	0.718	0.704037
1797	ARL13B_KAN416-38_3.tif:0003-0518	1.794	2162.49	467	3779	48.411	83.568	0.541	3879.75	149212	3.531	0.283	0.807	1.66991
1798	ARL13B_KAN416-38_3.tif:0004-0520	1.924	1484.76	450	3335	115.967	83.787	0.436	2856.84	109872	5.102	0.196	0.722	1.22964
1799	ARL13B_KAN416-38_3.tif:0005-0522	2.288	933.602	450	2477	180.545	83.965	0.361	2136.21	82157	3.752	0.267	0.568	0.919463
1800	ARL13B_KAN416-38_3.tif:0006-0530	1.638	2023.59	482	3744	160.578	85.482	0.496	3314.84	127486	4.502	0.222	0.797	1.42676
1801	ARL13B_KAN416-38_3.tif:0007-0641	2.366	1352.29	117	3733	47.405	103.392	0.479	3199.7	123058	3.401	0.294	0.734	1.37721
1802	ARL13B_KAN416-38_3.tif:0008-0687	1.326	738	462	1426	91.633	110.787	0.266	978.647	37638	7.866	0.127	0.611	0.421227
1803	ARL13B_KAN416-38_3.tif:0009-0730	1.898	1454.8	157	3599	83.584	117.7	0.525	2761.37	106200	3.43	0.292	0.781	1.18854
1804	ARL13B_KAN416-38_3.tif:0010-0746	2.184	1420.36	439	3791	159.993	120.304	0.393	3102.25	119310	5.656	0.177	0.764	1.33526
1805	ARL13B_KAN416-38_3.tif:0011-0756	1.612	665.081	130	1474	202.137	121.856	0.522	1072.17	41235	2.713	0.369	0.717	0.461483
1806	ARL13B_KAN416-38_3.tif:0012-0782	1.95	1376.48	451	3806	117.023	126.137	0.356	2684.3	103236	6.247	0.16	0.701	1.15537
1807	ARL13B_KAN416-38_3.tif:0013-0788	1.378	765.075	408	1726	28.464	127.027	0.51	1054.34	40549	4.378	0.228	0.822	0.453806
1808	ARL13B_KAN416-38_3.tif:0014-0797	0.884	629.824	309	1348	37.685	128.592	0.323	556.798	21414	4.947	0.202	0.557	0.239656
1809	ARL13B_KAN416-38_3.tif:0015-0832	0.65	587.96	223	987	57.299	134.208	0.351	382.197	14699	6.042	0.166	0.746	0.164504
1810	ARL13B_KAN416-38_3.tif:0016-0874	1.976	805.658	472	1794	146.116	140.996	0.323	1592.08	61230	6.543	0.153	0.717	0.685258
1811	ARL13B_KAN416-38_3.tif:0017-0905	0.962	1087.73	465	2382	27.667	145.981	0.545	1046.46	40246	3.484	0.287	0.747	0.450415
1812	ARL13B_KAN416-38_3.tif:0018-0999	2.574	1311	461	3086	174.382	161.138	0.287	3374.72	129789	7.475	0.134	0.731	1.45254
1813	ARL13B_KAN416-38_4.tif:0001-0005	1.508	1327.83	465	2507	200.753	0.817	0.558	2002.48	77014	3.216	0.311	0.906	0.861905
1814	ARL13B_KAN416-38_4.tif:0002-0035	2.366	1408.89	451	3835	32.495	5.813	0.397	3333.64	128209	4.745	0.211	0.677	1.43486
1815	ARL13B_KAN416-38_4.tif:0003-0155	3.51	1174.82	450	2361	57.322	25	0.586	4123.87	158601	3.463	0.289	0.882	1.77499
1816	ARL13B_KAN416-38_4.tif:0004-0340	3.354	1115.5	458	2428	152.422	54.934	0.531	3741.62	143900	3.958	0.253	0.801	1.61046
1817	ARL13B_KAN416-38_4.tif:0005-0345	3.926	1477.76	455	3794	31.958	55.71	0.454	5802.02	223141	4.563	0.219	0.818	2.49729
1818	ARL13B_KAN416-38_4.tif:0006-0364	2.106	1520.59	453	3370	173.408	58.788	0.475	3202.56	123168	4.222	0.237	0.757	1.37844
1819	ARL13B_KAN416-38_4.tif:0007-0422	3.9	1646.59	451	3454	51.735	68.043	0.55	6422.07	246988	3.365	0.297	0.82	2.76418
1820	ARL13B_KAN416-38_4.tif:0008-0473	1.69	1347.03	477	3621	1.648	76.238	0.587	2276.62	87557	3.668	0.273	0.897	0.979897
1821	ARL13B_KAN416-38_4.tif:0009-0539	2.548	715.255	395	1307	221.806	87.034	0.363	1822.58	70095	5.372	0.186	0.742	0.784471
1822	ARL13B_KAN416-38_4.tif:0010-0620	1.586	579.41	451	779	129.229	99.929	0.451	918.999	35344	4.067	0.246	0.748	0.395554
1823	ARL13B_KAN416-38_4.tif:0011-0647	3.978	1353.23	460	3550	152.525	104.333	0.47	5383.47	207044	4.909	0.204	0.818	2.31714
1824	ARL13B_KAN416-38_4.tif:0012-0697	2.548	805	328	1862	15.12	112.539	0.409	2051.26	78890	5.075	0.197	0.74	0.8829
1825	ARL13B_KAN416-38_4.tif:0013-0710	1.924	1349.63	159	3806	35.49	114.625	0.509	2596.85	99873	4.297	0.233	0.892	1.11773
1826	ARL13B_KAN416-38_4.tif:0014-0805	2.678	1458.83	450	3811	76.51	129.932	0.41	3906.97	150259	4.814	0.208	0.696	1.68163
1827	ARL13B_KAN416-38_4.tif:0015-0806	2.496	776.906	327	1485	46.536	130.13	0.282	1939.28	74583	6.903	0.145	0.66	0.834698
1828	ARL13B_KAN416-38_4.tif:0016-0886	3.12	918.283	451	1620	144.89	142.763	0.499	2865.22	110194	4.196	0.238	0.857	1.23324
1829	ARL13B_KAN416-38_4.tif:0017-0952	0.598	511.391	446	637	41.879	153.689	0.548	305.83	11762	3.054	0.327	0.767	0.131635
1830	ARL13B_KAN416-38_4.tif:0018-0964	1.612	717.758	450	1360	40.266	155.721	0.509	1157.1	44501	3.15	0.317	0.752	0.498035
1831	ARL13B_KAN416-38_4.tif:0019-0977	2.6	844.79	144	1359	222.909	157.499	0.593	2196.59	84479	2.605	0.384	0.791	0.94545
1832	ARL13B_KAN416-38_5.tif:0001-0005	2.236	1155.85	193	3119	198.486	0.821	0.466	2584.63	99403	5.134	0.195	0.882	1.11247
1833	ARL13B_KAN416-38_5.tif:0002-0092	1.378	876.075	454	2057	69.798	14.891	0.227	1207.31	46432	6.962	0.144	0.486	0.519645
1834	ARL13B_KAN416-38_5.tif:0003-0150	2.236	970.674	224	2116	81.019	24.304	0.395	2170.56	83478	4.507	0.222	0.672	0.934247
1835	ARL13B_KAN416-38_5.tif:0004-0158	2.34	627.3	366	1068	21.418	25.544	0.347	1467.97	56457	5.63	0.178	0.61	0.631841
1836	ARL13B_KAN416-38_5.tif:0005-0326	3.094	1409	460	3793	76.088	52.404	0.405	4359.71	167671	4.552	0.22	0.676	1.8765
1837	ARL13B_KAN416-38_5.tif:0006-0337	1.17	977.867	485	1977	214.765	54.472	0.551	1144.17	44004	3.239	0.309	0.796	0.492472
1838	ARL13B_KAN416-38_5.tif:0007-0363	2.288	2022.33	486	3718	110.607	58.545	0.579	4627.37	177965	3.402	0.294	0.8	1.9917
1839	ARL13B_KAN416-38_5.tif:0008-0511	1.924	907.986	463	2543	89.385	82.529	0.27	1747.07	67191	7.685	0.13	0.574	0.75197
1840	ARL13B_KAN416-38_5.tif:0009-0518	1.508	838.862	353	2029	148.964	83.561	0.301	1265.08	48654	7.685	0.13	0.663	0.544513
1841	ARL13B_KAN416-38_5.tif:0010-0639	2.34	2104.39	454	3671	150.385	103.007	0.528	4924.57	189395	3.803	0.263	0.826	2.11962
1842	ARL13B_KAN416-38_5.tif:0011-0653	1.092	1258.19	475	3076	47.699	105.446	0.594	1374.03	52844	3.226	0.31	0.792	0.591406
1843	ARL13B_KAN416-38_5.tif:0012-0730	2.574	1719.07	301	3773	172.786	117.862	0.445	4425.15	170188	4.837	0.207	0.773	1.90467
1844	ARL13B_KAN416-38_5.tif:0013-0743	1.82	981.014	450	2536	55.905	119.749	0.288	1785.55	68671	7.378	0.136	0.622	0.768534
1845	ARL13B_KAN416-38_5.tif:0014-0837	2.184	1383.49	134	3732	82.451	135.081	0.503	3021.72	116213	4.111	0.243	0.789	1.3006
1846	ARL13B_KAN416-38_6.tif:0001-0032	1.69	811.492	263	1517	222.886	5.189	0.579	1371.51	52747	3.02	0.331	0.812	0.59032
1847	ARL13B_KAN416-38_6.tif:0002-0036	0.858	649.515	64	1435	55.932	5.92	0.502	557.318	21434	3.337	0.3	0.725	0.239879
1848	ARL13B_KAN416-38_6.tif:0003-0099	1.56	1194.63	453	3561	4.975	15.956	0.341	1863.74	71678	6.929	0.144	0.67	0.802187
1849	ARL13B_KAN416-38_6.tif:0004-0133	1.95	1182.05	462	2431	13.245	21.529	0.435	2305.14	88654	4.401	0.227	0.708	0.992174
1850	ARL13B_KAN416-38_6.tif:0005-0140	2.21	714.459	310	1611	211.973	22.563	0.247	1579.05	60729	8.518	0.117	0.649	0.679651
1851	ARL13B_KAN416-38_6.tif:0006-0221	3.406	1258.62	455	2443	21.688	35.682	0.542	4287.11	164879	3.563	0.281	0.816	1.84525
1852	ARL13B_KAN416-38_6.tif:0007-0234	2.08	823.663	138	1865	166.515	37.7	0.407	1713.32	65893	3.272	0.306	0.632	0.737444
1853	ARL13B_KAN416-38_6.tif:0008-0403	1.924	1120.39	423	3280	167.173	65.034	0.467	2155.76	82909	4.145	0.241	0.733	0.927879
1854	ARL13B_KAN416-38_6.tif:0009-0418	3.38	1349.31	451	3054	56.098	67.37	0.53	4560.94	175410	4.17	0.24	0.836	1.96311
1855	ARL13B_KAN416-38_6.tif:0010-0504	2.834	1296.56	152	3837	169.464	81.374	0.382	3674.67	141325	6.446	0.155	0.893	1.58164
1856	ARL13B_KAN416-38_6.tif:0011-0539	1.69	1327.51	401	3711	115.26	86.863	0.564	2243.62	86288	3.008	0.332	0.71	0.965695
1857	ARL13B_KAN416-38_6.tif:0012-0610	1.586	594.951	451	817	6.621	98.06	0.267	943.649	36292	5.209	0.192	0.519	0.406163
1858	ARL13B_KAN416-38_6.tif:0013-0674	2.236	953.802	454	2292	190.106	108.696	0.337	2132.83	82027	5.814	0.172	0.677	0.918008
1859	ARL13B_KAN416-38_6.tif:0014-0765	2.574	1695.14	470	3788	170.059	123.403	0.566	4363.56	167819	3.481	0.287	0.857	1.87815
1860	ARL13B_KAN416-38_6.tif:0015-0808	1.924	989.946	455	2184	34.619	130.288	0.403	1904.77	73256	5.267	0.19	0.759	0.819847
1861	ARL13B_KAN416-38_6.tif:0016-0816	2.236	1191.41	456	3767	201.998	131.685	0.381	2664.15	102461	5.297	0.189	0.639	1.1467
1862	ARL13B_KAN416-38_6.tif:0017-0951	0.598	607.957	431	974	1.896	153.268	0.532	363.58	13983	3.846	0.26	0.767	0.156491
1863	ARL13B_KAN416-38_6.tif:0018-0953	0.624	809.958	469	1462	111.827	153.718	0.597	505.444	19439	3.263	0.306	0.906	0.217552
1864	ARL13B_KAN416-38_6.tif:0019-0969	1.846	1239.42	462	2943	191.843	156.23	0.418	2288.11	87999	5.646	0.177	0.74	0.984844
1865	ARL13B_KAN416-38_6.tif:0020-1000	2.184	1863.93	98	3830	154.458	161.311	0.344	4071.07	156570	3.5	0.286	0.594	1.75226
1866	ARL13B_KAN416-38_6.tif:0021-0999	1.092	1028.38	492	1954	102.678	161.227	0.511	1123.06	43192	4.116	0.243	0.8	0.483385
										96110.3				1.07562
1867	ARL13B_KAN416-39_1.tif:0001-0012	1.69	1182.05	451	2185	108.389	1.847	0.437	1997.78	76833	4.314	0.232	0.765	0.859879
1868	ARL13B_KAN416-39_1.tif:0002-0013	2.704	1794.76	309	3796	206.71	2.05	0.487	4853.32	186655	3.814	0.262	0.748	2.08896
1869	ARL13B_KAN416-39_1.tif:0003-0052	2.158	1089.4	394	2260	97.711	8.435	0.505	2351.06	90420	3.694	0.271	0.748	1.01194
1870	ARL13B_KAN416-39_1.tif:0004-0079	2.912	2038.28	474	3729	180.646	12.645	0.51	5935.82	228287	3.478	0.288	0.749	2.55488
1871	ARL13B_KAN416-39_1.tif:0005-0096	4.55	944.4	452	2874	94.033	15.755	0.403	4297.28	165270	4.22	0.237	0.682	1.84963
1872	ARL13B_KAN416-39_1.tif:0006-0121	1.768	1344.5	453	2893	201.299	19.559	0.436	2377.22	91426	4.768	0.21	0.72	1.0232
1873	ARL13B_KAN416-39_1.tif:0007-0147	2.288	1932.3	475	3797	41.099	23.636	0.518	4421.36	170042	4.1	0.244	0.789	1.90303
1874	ARL13B_KAN416-39_1.tif:0008-0199	3.172	1579.38	458	3754	62.947	32.093	0.323	5010.11	192685	6.815	0.147	0.672	2.15644
1875	ARL13B_KAN416-39_1.tif:0009-0215	2.99	1662.53	455	3731	111.863	34.878	0.333	4971.27	191191	4.559	0.219	0.625	2.13972
1876	ARL13B_KAN416-39_1.tif:0010-0230	1.56	622.617	266	1021	58.287	37.214	0.235	971.34	37357	8.101	0.123	0.563	0.418082
1877	ARL13B_KAN416-39_1.tif:0011-0247	3.952	2175.24	454	3677	131.468	39.848	0.4	8597.05	330636	5.237	0.191	0.804	3.70032
1878	ARL13B_KAN416-39_1.tif:0012-0300	3.822	1006.82	453	2535	57.318	48.396	0.342	3848.31	148003	6.242	0.16	0.762	1.65638
1879	ARL13B_KAN416-39_1.tif:0013-0331	2.834	591.89	451	806	76.139	53.318	0.467	1677.52	64516	3.659	0.273	0.701	0.722033
1880	ARL13B_KAN416-39_1.tif:0014-0345	3.796	1106.56	34	2837	56.382	55.58	0.254	4200.76	161558	3.91	0.256	0.529	1.80808
1881	ARL13B_KAN416-39_1.tif:0015-0358	1.066	840.537	474	1735	12.815	57.808	0.424	896.066	34462	4.452	0.225	0.646	0.385683
1882	ARL13B_KAN416-39_1.tif:0016-0413	1.638	1647.79	456	3422	156.268	66.718	0.575	2699.25	103811	3.399	0.294	0.787	1.1618
1883	ARL13B_KAN416-39_1.tif:0017-0427	1.768	1085.65	455	2643	21.351	68.716	0.391	1919.54	73824	4.357	0.23	0.677	0.826204
1884	ARL13B_KAN416-39_1.tif:0018-0445	2.496	1315.26	453	3315	134.219	71.923	0.361	3283.09	126265	5.514	0.181	0.671	1.4131
1885	ARL13B_KAN416-39_1.tif:0019-0442	3.25	723.904	421	1142	60.534	71.282	0.459	2352.83	90488	4.035	0.248	0.71	1.0127
1886	ARL13B_KAN416-39_1.tif:0020-0476	2.6	965.83	480	2395	32.432	76.705	0.23	2511.31	96583	8.243	0.121	0.556	1.08091
1887	ARL13B_KAN416-39_1.tif:0021-0484	1.612	650.484	411	1029	97.182	78.219	0.333	1048.64	40330	5.827	0.172	0.725	0.451355
1888	ARL13B_KAN416-39_1.tif:0022-0564	2.626	1624.02	441	3725	74.918	91.096	0.366	4264.93	164026	5.167	0.194	0.692	1.8357
1889	ARL13B_KAN416-39_1.tif:0023-0625	2.184	1226.42	432	2846	20.352	100.589	0.393	2678.66	103019	3.428	0.292	0.667	1.15294
1890	ARL13B_KAN416-39_1.tif:0024-0649	2.756	1406.74	456	2984	105.511	104.499	0.324	3877.2	149114	6.03	0.166	0.637	1.66881
1891	ARL13B_KAN416-39_1.tif:0025-0835	1.872	838.681	238	2181	87.765	134.662	0.315	1570.11	60385	7.602	0.132	0.796	0.675801
1892	ARL13B_KAN416-39_1.tif:0026-0858	2.444	972.457	125	2360	18.407	138.083	0.272	2376.83	91411	2.269	0.441	0.448	1.02303
1893	ARL13B_KAN416-39_1.tif:0027-0860	1.924	1756.62	470	3783	33.501	138.607	0.5	3379.94	129990	3.463	0.289	0.729	1.45479
1894	ARL13B_KAN416-39_1.tif:0028-0880	2.184	1954.44	450	3852	176.528	142.05	0.505	4268.76	164173	4.139	0.242	0.796	1.83735
1895	ARL13B_KAN416-39_1.tif:0029-0949	2.314	1607.01	451	3838	78.888	153.004	0.396	3718.85	143024	3.941	0.254	0.638	1.60066
1896	ARL13B_KAN416-39_2.tif:0001-0014	2.132	1067.15	469	1946	215.123	2.21	0.554	2275.29	87506	2.968	0.337	0.763	0.979327
1897	ARL13B_KAN416-39_2.tif:0002-0042	3.9	1660.34	453	3549	140.27	6.619	0.575	6475.72	249051	3.071	0.326	0.796	2.78726
1898	ARL13B_KAN416-39_2.tif:0003-0148	0.754	625.448	454	860	185.718	23.84	0.501	471.616	18138	3.697	0.271	0.763	0.202992
1899	ARL13B_KAN416-39_2.tif:0004-0166	2.886	1218.65	427	2270	178.865	26.742	0.435	3517.23	135270	4.927	0.203	0.822	1.51388
1900	ARL13B_KAN416-39_2.tif:0005-0187	2.756	1578.23	451	3724	157.001	30.102	0.333	4349.85	167292	5.535	0.181	0.629	1.87225
1901	ARL13B_KAN416-39_2.tif:0006-0320	2.106	1898.06	356	3678	73.863	51.752	0.599	3997.56	153743	2.576	0.388	0.783	1.72062
1902	ARL13B_KAN416-39_2.tif:0007-0401	2.704	955.596	452	2220	200.46	64.654	0.402	2584.09	99382	5.261	0.19	0.686	1.11224
1903	ARL13B_KAN416-39_2.tif:0008-0428	2.86	1649.71	453	3774	139.48	68.994	0.585	4718.45	181468	3.272	0.306	0.87	2.03091
1904	ARL13B_KAN416-39_2.tif:0009-0524	2.496	866.135	453	1864	69.737	84.601	0.404	2162	83149	5.409	0.185	0.722	0.930565
1905	ARL13B_KAN416-39_2.tif:0010-0609	2.028	1935.27	486	3765	22.734	98.28	0.492	3924.96	150951	3.965	0.252	0.776	1.68937
1906	ARL13B_KAN416-39_2.tif:0011-0668	3.458	1403.07	452	3758	202.552	107.743	0.434	4852.1	186608	5.123	0.195	0.769	2.08843
1907	ARL13B_KAN416-39_2.tif:0012-0692	0.702	834.074	459	1719	82.945	111.642	0.5	585.555	22520	4.122	0.243	0.667	0.252033
1908	ARL13B_KAN416-39_2.tif:0013-0733	1.976	991.789	247	1836	10.957	118.228	0.562	1959.89	75376	3.122	0.32	0.741	0.843573
1909	ARL13B_KAN416-39_2.tif:0014-0803	2.418	1550.75	502	3037	160.452	129.75	0.56	3749.95	144220	3.05	0.328	0.791	1.61404
1910	ARL13B_KAN416-39_2.tif:0015-0808	0.936	1050.11	454	2016	30.208	130.245	0.552	982.963	37804	3.268	0.306	0.774	0.423085
1911	ARL13B_KAN416-39_2.tif:0016-0970	2.652	1911.54	505	3773	136.634	156.596	0.445	5069.71	194977	4.585	0.218	0.791	2.18209
1912	ARL13B_KAN416-39_2.tif:0017-0995	2.47	1986.64	390	3697	95.868	160.485	0.536	4907.3	188731	3.095	0.323	0.779	2.11219
1913	ARL13B_KAN416-39_3.tif:0001-0019	3.016	1209.26	352	2656	85.221	3.192	0.339	3647.34	140274	7.163	0.14	0.869	1.56988
1914	ARL13B_KAN416-39_3.tif:0002-0166	2.73	2230.43	455	3718	59.86	26.715	0.586	6089.44	234195	3.334	0.3	0.868	2.621
1915	ARL13B_KAN416-39_3.tif:0003-0194	2.444	1380.36	558	2679	213.895	31.248	0.365	3373.81	129754	5.355	0.187	0.701	1.45215
1916	ARL13B_KAN416-39_3.tif:0004-0204	2.184	1514.89	470	3020	133.92	32.905	0.393	3308.72	127251	5.627	0.178	0.778	1.42413
1917	ARL13B_KAN416-39_3.tif:0005-0223	2.782	1505.86	458	3826	161.427	35.953	0.267	4189.55	161127	8.002	0.125	0.648	1.80326
1918	ARL13B_KAN416-39_3.tif:0006-0373	2.652	1795.96	467	3665	35.445	60.233	0.488	4763.18	183188	4.31	0.232	0.788	2.05016
1919	ARL13B_KAN416-39_3.tif:0007-0453	3.198	708.577	450	1047	209.766	73.122	0.32	2266.17	87155	6.248	0.16	0.709	0.975398
1920	ARL13B_KAN416-39_3.tif:0008-0496	2.6	1311.8	473	3425	145.235	80.038	0.275	3410.89	131180	8.191	0.122	0.69	1.46811
1921	ARL13B_KAN416-39_3.tif:0009-0501	1.482	1239.95	475	3522	74.035	81.155	0.445	1837.71	70677	3.735	0.268	0.74	0.790984
1922	ARL13B_KAN416-39_3.tif:0010-0591	1.43	1061.51	450	2297	207.724	95.359	0.525	1518.05	58383	3.634	0.275	0.791	0.653395
1923	ARL13B_KAN416-39_3.tif:0011-0635	3.224	1001.64	454	2119	221.491	102.537	0.322	3229.47	124203	6.568	0.152	0.707	1.39002
1924	ARL13B_KAN416-39_3.tif:0012-0642	2.236	1832.12	458	3744	141.549	103.676	0.504	4096.86	157562	3.525	0.284	0.775	1.76336
1925	ARL13B_KAN416-39_3.tif:0013-0655	2.106	1978.53	469	3815	22.072	105.717	0.454	4167.04	160261	4.387	0.228	0.761	1.79357
1926	ARL13B_KAN416-39_3.tif:0014-0702	2.366	1414.08	351	3848	77.124	113.312	0.39	3345.91	128681	6.414	0.156	0.847	1.44014
1927	ARL13B_KAN416-39_3.tif:0015-0737	2.08	700.737	249	1465	150.654	118.722	0.392	1457.62	56059	4.931	0.203	0.702	0.627386
1928	ARL13B_KAN416-39_3.tif:0016-0753	2.418	1506.81	478	3539	193.326	121.249	0.337	3643.68	140133	6.007	0.166	0.639	1.5683
1929	ARL13B_KAN416-39_3.tif:0017-0864	1.794	1609.96	455	3842	86.896	139.431	0.431	2888.44	111087	4.78	0.209	0.793	1.24323
1930	ARL13B_KAN416-39_3.tif:0018-0869	1.664	949.891	456	1830	221.532	140.164	0.381	1580.71	60793	4.859	0.206	0.674	0.680367
1931	ARL13B_KAN416-39_3.tif:0019-0902	3.068	1184.33	450	2651	190.517	145.49	0.386	3633.74	139751	5.119	0.195	0.724	1.56403
1932	ARL13B_KAN416-39_3.tif:0020-0972	2.028	1321.3	480	3698	70.361	156.766	0.393	2679.75	103061	5.232	0.191	0.696	1.15341
1933	ARL13B_KAN416-39_3.tif:0021-1009	3.068	1235.81	453	2788	140.659	162.731	0.229	3791.68	145825	10.477	0.095	0.661	1.63201
1934	ARL13B_KAN416-39_4.tif:0001-0044	1.872	811.361	465	1411	157.81	7.182	0.5	1518.96	58418	4.351	0.23	0.738	0.653787
1935	ARL13B_KAN416-39_4.tif:0002-0099	2.288	1136.23	461	2120	197.084	16.024	0.45	2599.84	99988	4.383	0.228	0.804	1.11902
1936	ARL13B_KAN416-39_4.tif:0003-0214	3.328	1265.49	199	3230	86.424	34.447	0.528	4211.81	161983	3.587	0.279	0.803	1.81284
1937	ARL13B_KAN416-39_4.tif:0004-0214	2.444	1264.46	463	2824	148.086	34.499	0.381	3090.52	118859	5.525	0.181	0.709	1.33021
1938	ARL13B_KAN416-39_4.tif:0005-0261	2.236	929.093	463	2113	180.93	42.054	0.439	2077.58	79902	5.193	0.193	0.771	0.894226
1939	ARL13B_KAN416-39_4.tif:0006-0290	3.952	1836.34	451	3713	100.843	46.895	0.553	7257.64	279123	3.533	0.283	0.874	3.12382
1940	ARL13B_KAN416-39_4.tif:0007-0332	3.822	1308.48	419	2523	21.137	53.55	0.434	5001.32	192347	4.949	0.202	0.826	2.15266
1941	ARL13B_KAN416-39_4.tif:0008-0378	1.56	1003.08	454	2559	131.446	61.192	0.252	1564.9	60185	9.134	0.109	0.628	0.673563
1942	ARL13B_KAN416-39_4.tif:0009-0400	3.25	1416.54	348	3392	72.132	64.484	0.58	4604.02	177067	3.062	0.327	0.799	1.98165
1943	ARL13B_KAN416-39_4.tif:0010-0476	2.782	866.692	451	2217	130.545	76.848	0.555	2411.28	92736	3.401	0.294	0.863	1.03786
1944	ARL13B_KAN416-39_4.tif:0011-0520	3.9	1376.45	422	2978	199.207	84.141	0.327	5368.47	206467	5.716	0.175	0.688	2.31068
1945	ARL13B_KAN416-39_4.tif:0012-0616	2.912	1409.77	455	3400	217.205	99.249	0.421	4105.49	157894	5.245	0.191	0.783	1.76708
1946	ARL13B_KAN416-39_4.tif:0013-0613	0.832	1038.31	477	2638	181.537	98.771	0.567	863.928	33226	2.701	0.37	0.762	0.37185
1947	ARL13B_KAN416-39_4.tif:0014-0628	6.448	1352.9	465	3142	82.739	100.902	0.221	8724.02	335519	6.535	0.153	0.549	3.75497
1948	ARL13B_KAN416-39_4.tif:0015-0622	1.04	698.675	464	1191	179.354	100.402	0.394	726.666	27947	5.697	0.176	0.696	0.31277
1949	ARL13B_KAN416-39_4.tif:0016-0665	3.822	1556.27	450	3588	76.734	107.156	0.478	5948.43	228772	4.394	0.228	0.819	2.56031
1950	ARL13B_KAN416-39_4.tif:0017-0758	3.016	1197.61	452	2991	195.057	122.318	0.261	3612.22	138923	7.33	0.136	0.636	1.55476
1951	ARL13B_KAN416-39_4.tif:0018-0770	1.456	723.696	409	1435	216.665	124.22	0.463	1053.77	40527	3.548	0.282	0.794	0.453559
1952	ARL13B_KAN416-39_4.tif:0019-0774	1.43	854.527	451	1566	14.452	124.733	0.596	1222.05	46999	3.15	0.317	0.815	0.525991
1953	ARL13B_KAN416-39_4.tif:0020-0842	2.652	1688.92	460	3737	109.677	135.837	0.592	4479.29	172270	3.161	0.316	0.829	1.92797
1954	ARL13B_KAN416-39_4.tif:0021-0983	1.17	773.867	457	1239	214.561	158.571	0.381	905.479	34824	5.21	0.192	0.677	0.389734
1955	ARL13B_KAN416-39_5.tif:0001-0292	2.288	1153.72	279	2947	183.534	47.144	0.382	2639.86	101527	5.395	0.185	0.698	1.13624
1956	ARL13B_KAN416-39_5.tif:0002-0408	2.704	2357.73	465	3749	112.979	65.812	0.589	6375.69	245204	3.194	0.313	0.819	2.74421
1957	ARL13B_KAN416-39_5.tif:0003-0421	2.392	1317.36	400	2913	99.724	67.867	0.289	3151.31	121197	7.884	0.127	0.681	1.35638
1958	ARL13B_KAN416-39_5.tif:0004-0438	3.614	2118.2	452	3853	71.132	70.645	0.484	7655.64	294430	4.555	0.22	0.785	3.29512
1959	ARL13B_KAN416-39_5.tif:0005-0486	2.418	1631.23	328	3741	28.318	78.384	0.426	3944.54	151704	5.254	0.19	0.785	1.6978
1960	ARL13B_KAN416-39_5.tif:0006-0537	2.236	1305.14	499	2958	41.657	86.743	0.347	2918.47	112242	6.329	0.158	0.688	1.25616
1961	ARL13B_KAN416-39_5.tif:0007-0539	2.626	2001.21	348	3754	157.192	86.784	0.46	5255.49	202122	3.529	0.283	0.669	2.26206
1962	ARL13B_KAN416-39_5.tif:0008-0680	2.21	1301.26	463	2861	30.779	109.827	0.368	2875.95	110607	6.046	0.165	0.72	1.23786
1963	ARL13B_KAN416-39_5.tif:0009-0679	2.028	826.372	278	1621	219.317	109.66	0.273	1675.98	64457	5.725	0.175	0.538	0.721373
1964	ARL13B_KAN416-39_5.tif:0010-0697	2.418	820.022	454	1549	106.833	112.38	0.201	1982.93	76262	8.822	0.113	0.51	0.853489
1965	ARL13B_KAN416-39_5.tif:0011-0760	2.262	1704.78	462	3830	202.681	122.529	0.395	3856.45	148316	5.483	0.182	0.773	1.65988
1966	ARL13B_KAN416-39_5.tif:0012-0757	1.534	999.186	325	1867	106.962	122.294	0.382	1532.84	58952	3.871	0.258	0.648	0.659763
1967	ARL13B_KAN416-39_5.tif:0013-0805	2.834	1033.75	454	2716	115.219	129.81	0.442	2929.83	112679	4.367	0.229	0.752	1.26105
1968	ARL13B_KAN416-39_5.tif:0014-0852	2.028	1082.23	454	3261	138.526	137.215	0.249	2194.9	84414	8.61	0.116	0.664	0.944722
1969	ARL13B_KAN416-39_5.tif:0015-0888	2.652	1157.23	322	2501	10.133	143.326	0.346	3069.17	118038	5.094	0.196	0.68	1.32103
1970	ARL13B_KAN416-39_5.tif:0016-0913	2.678	1103.89	201	2539	156.196	147.155	0.419	2956.4	113701	5.149	0.194	0.866	1.27249
1971	ARL13B_KAN416-39_5.tif:0017-0944	3.406	911.573	454	1628	105.751	152.495	0.372	3105	119416	4.618	0.217	0.649	1.33645
1972	ARL13B_KAN416-39_5.tif:0018-0985	1.794	568.014	448	885	43.847	158.79	0.251	1019.08	39193	7.325	0.137	0.554	0.43863
1973	ARL13B_KAN416-39_5.tif:0019-1002	3.224	2046.16	475	3761	174.072	161.416	0.442	6597.22	253724	4.41	0.227	0.754	2.83956
1974	ARL13B_KAN416-39_5.tif:0020-1030	1.144	859.455	464	1394	47.891	166.208	0.494	983.275	37816	4.027	0.248	0.786	0.423219
1975	ARL13B_KAN416-39_6.tif:0001-0133	2.73	765.324	332	1247	184.905	21.485	0.503	2089.46	80359	4.195	0.238	0.82	0.899341
1976	ARL13B_KAN416-39_6.tif:0002-0221	4.342	1384.08	451	3022	202.445	35.725	0.486	6010.03	231141	3.338	0.3	0.786	2.58682
1977	ARL13B_KAN416-39_6.tif:0003-0244	3.692	945.549	326	1979	151.344	39.285	0.489	3491.18	134268	4.255	0.235	0.843	1.50267
1978	ARL13B_KAN416-39_6.tif:0004-0299	2.106	670.309	460	1115	193.857	48.149	0.376	1411.76	54295	5.479	0.183	0.794	0.607644
1979	ARL13B_KAN416-39_6.tif:0005-0456	2.86	1206.86	459	2506	166.089	73.75	0.508	3451.84	132755	3.583	0.279	0.769	1.48573
1980	ARL13B_KAN416-39_6.tif:0006-0498	2.392	1523.79	472	3741	52.396	80.241	0.438	3645.13	140189	3.363	0.297	0.648	1.56893
1981	ARL13B_KAN416-39_6.tif:0007-0567	3.562	1234.07	427	3199	149.003	91.349	0.479	4396.01	169067	4.18	0.239	0.781	1.89212
1982	ARL13B_KAN416-39_6.tif:0008-0577	3.198	886.61	451	2724	34.964	93.155	0.391	2835.55	109053	5.748	0.174	0.721	1.22047
1983	ARL13B_KAN416-39_6.tif:0009-0637	1.924	1359.26	450	3418	193.395	102.79	0.41	2615.37	100585	4.925	0.203	0.698	1.1257
1984	ARL13B_KAN416-39_6.tif:0010-0658	3.588	933.362	461	1806	139.043	106.35	0.45	3349.11	128804	3.886	0.257	0.717	1.44151
1985	ARL13B_KAN416-39_6.tif:0011-0699	2.314	727.607	462	1205	25.647	112.756	0.368	1683.78	64757	5.91	0.169	0.739	0.72473
1986	ARL13B_KAN416-39_6.tif:0012-0735	2.912	1961.3	454	3764	79.146	118.536	0.438	5711.66	219666	5.005	0.2	0.78	2.4584
1987	ARL13B_KAN416-39_6.tif:0013-0738	3.484	1500.3	421	3707	123.468	118.932	0.559	5227.35	201040	3.167	0.316	0.793	2.24995
1988	ARL13B_KAN416-39_6.tif:0014-0746	3.458	1603.86	423	3789	185.454	120	0.424	5546.47	213313	2.858	0.35	0.639	2.3873
1989	ARL13B_KAN416-39_6.tif:0015-0804	2.938	1224.99	461	2232	46.525	129.627	0.526	3599.24	138424	2.945	0.34	0.766	1.54918
1990	ARL13B_KAN416-39_6.tif:0016-0836	2.418	890.118	429	2101	155.843	134.834	0.321	2152.44	82781	7.579	0.132	0.741	0.926447
1991	ARL13B_KAN416-39_6.tif:0017-0917	2.574	1128.62	466	2734	214.468	147.598	0.332	2905.23	111733	2.668	0.375	0.521	1.25046
1992	ARL13B_KAN416-39_6.tif:0018-0924	3.848	1145.38	0	3658	8.022	148.946	0.489	4407.71	169517	2.859	0.35	0.736	1.89716
1993	ARL13B_KAN416-39_6.tif:0019-0948	5.434	638.273	0	2192	130.626	152.887	0.313	3468.58	133399	2.506	0.399	0.608	1.49294
1994	ARL13B_KAN416-39_6.tif:0020-0976	3.952	1885.2	470	3570	79.47	157.278	0.571	7450.75	286550	3.004	0.333	0.811	3.20693
1995	ARL13B_KAN416-39_6.tif:0021-1018	2.314	1055.27	269	2619	57.268	164.336	0.383	2442.04	93919	2.718	0.368	0.601	1.0511
										130528				1.46081
93	ARL13B_KAN416-42_1.tif:0001-0021	3.744	2094.32	315	3441	85.693	3.456	0.546	7841.6	301582	3.768	0.265	0.906	3.37517
94	ARL13B_KAN416-42_1.tif:0002-0073	2.678	2157.52	450	3737	40.127	11.681	0.555	5778.2	222225	3.096	0.323	0.76	2.48704
95	ARL13B_KAN416-42_1.tif:0003-0210	3.224	2205.63	456	3519	189.072	33.954	0.57	7111.38	273498	3.441	0.291	0.841	3.06086
96	ARL13B_KAN416-42_1.tif:0004-0308	3.77	1882.1	110	3578	177.429	49.761	0.333	7095.96	272905	5.547	0.18	0.72	3.05423
97	ARL13B_KAN416-42_1.tif:0005-0325	4.03	1961.4	105	3744	120.937	52.404	0.366	7904.92	304017	6.16	0.162	0.856	3.40242
98	ARL13B_KAN416-42_1.tif:0006-0319	1.378	618.019	341	976	24.798	51.571	0.583	851.681	32755	1.641	0.609	0.768	0.366579
99	ARL13B_KAN416-42_1.tif:0007-0338	1.82	1191.8	464	2856	44.415	54.484	0.593	2169.21	83426	3.229	0.31	0.787	0.933665
100	ARL13B_KAN416-42_1.tif:0008-0376	3.042	1832.58	132	3405	175.861	60.769	0.431	5575.05	214412	3.62	0.276	0.818	2.3996
101	ARL13B_KAN416-42_1.tif:0009-0491	3.094	2210.82	459	3757	47.339	79.31	0.47	6840.7	263088	3.579	0.279	0.721	2.94436
102	ARL13B_KAN416-42_1.tif:0010-0526	1.846	1211.38	474	3045	87.292	84.896	0.37	2236.34	86008	5.921	0.169	0.732	0.962562
103	ARL13B_KAN416-42_1.tif:0011-0658	4.082	2259.69	124	3798	69.857	105.893	0.359	9224.6	354771	5.091	0.196	0.657	3.97043
104	ARL13B_KAN416-42_1.tif:0012-0708	3.9	2281.95	460	3645	186.119	114.375	0.436	8900.13	342292	4.785	0.209	0.789	3.83077
105	ARL13B_KAN416-42_1.tif:0013-0838	2.366	2139.35	468	3808	17.682	135.242	0.55	5062.01	194681	3.74	0.267	0.843	2.17878
106	ARL13B_KAN416-42_1.tif:0014-0849	3.588	2186.12	451	3508	198.46	136.907	0.578	7844.28	301685	3.169	0.316	0.849	3.37632
107	ARL13B_KAN416-42_1.tif:0015-0958	2.938	2224.89	278	3718	18.028	154.353	0.536	6537.13	251413	3.53	0.283	0.81	2.8137
108	ARL13B_KAN416-42_1.tif:0016-0970	1.274	986.49	499	2447	155.71	156.362	0.459	1256.86	48338	4.321	0.231	0.705	0.540976
109	ARL13B_KAN416-42_2.tif:0001-0130	3.016	1217.46	437	2770	92.904	20.946	0.548	3672.07	141225	3.904	0.256	0.921	1.58052
110	ARL13B_KAN416-42_2.tif:0002-0431	3.38	1766.94	453	3566	21.193	69.459	0.527	5972.61	229702	3.576	0.28	0.833	2.57072
111	ARL13B_KAN416-42_2.tif:0003-0519	2.86	1990.09	460	3624	196.081	83.602	0.407	5692	218910	4.71	0.212	0.812	2.44994
112	ARL13B_KAN416-42_2.tif:0004-0607	4.394	1794.25	453	3581	92.234	97.787	0.513	7884.4	303228	3.771	0.265	0.839	3.39359
113	ARL13B_KAN416-42_2.tif:0005-0660	2.6	1485.78	324	3710	141.002	106.541	0.516	3863.26	148578	3.678	0.272	0.741	1.66282
114	ARL13B_KAN416-42_2.tif:0006-0666	2.418	2002.16	453	3721	57.751	107.421	0.562	4841.52	186201	3.854	0.259	0.823	2.08388
115	ARL13B_KAN416-42_2.tif:0007-0787	2.964	1813.24	319	3782	24.07	127.133	0.489	5374.76	206709	4.173	0.24	0.864	2.31339
116	ARL13B_KAN416-42_2.tif:0008-0811	1.248	1007.29	469	1966	2.563	130.861	0.575	1257.18	48350	3.532	0.283	0.8	0.541111
117	ARL13B_KAN416-42_2.tif:0009-0842	2.47	1917.18	460	3788	202.507	135.785	0.514	4735.72	182132	4.383	0.228	0.788	2.03834
118	ARL13B_KAN416-42_2.tif:0010-0893	1.898	1632.32	21	3754	49.107	144.262	0.317	3098.32	119159	2.178	0.459	0.545	1.33357
119	ARL13B_KAN416-42_2.tif:0011-0923	3.536	1630.93	451	3539	177.362	148.871	0.541	5767.33	221807	3.43	0.292	0.775	2.48236
120	ARL13B_KAN416-42_2.tif:0012-1021	2.028	1991.62	478	3726	195.59	164.733	0.521	4039.24	155346	3.648	0.274	0.761	1.73856
121	ARL13B_KAN416-42_3.tif:0001-0076	3.146	2178.62	474	3632	142.936	12.153	0.406	6854.35	263613	4.115	0.243	0.727	2.95023
122	ARL13B_KAN416-42_3.tif:0002-0220	3.068	2024.63	451	3771	54.616	35.459	0.486	6211.93	238906	4.677	0.214	0.814	2.67373
123	ARL13B_KAN416-42_3.tif:0003-0239	2.08	1248.08	448	3372	134.323	38.597	0.453	2596.15	99846	4.482	0.223	0.812	1.11743
124	ARL13B_KAN416-42_3.tif:0004-0290	2.834	1971.85	457	3695	204.057	46.706	0.526	5588.57	214932	3.872	0.258	0.79	2.40542
125	ARL13B_KAN416-42_3.tif:0005-0356	2.73	2025.96	459	3725	46.088	57.418	0.524	5531.21	212726	3.795	0.263	0.817	2.38073
126	ARL13B_KAN416-42_3.tif:0006-0391	2.47	2098.36	273	3744	109.838	63.231	0.455	5183.26	199344	3.357	0.298	0.776	2.23097
127	ARL13B_KAN416-42_3.tif:0007-0387	3.744	2241.58	451	3733	25.957	62.461	0.55	8392.99	322788	3.477	0.288	0.837	3.61249
128	ARL13B_KAN416-42_3.tif:0008-0526	3.926	2001.65	72	3687	152.027	85.083	0.514	7858.95	302249	2.938	0.34	0.726	3.38263
129	ARL13B_KAN416-42_3.tif:0009-0536	3.354	1449.06	453	3662	73.371	86.643	0.469	4860.45	186929	3.872	0.258	0.733	2.09202
130	ARL13B_KAN416-42_3.tif:0010-0637	2.834	1727.74	454	3707	203.688	102.847	0.331	4896.72	188324	6.754	0.148	0.734	2.10763
131	ARL13B_KAN416-42_3.tif:0011-0684	4.602	2153.22	454	3622	163.746	110.215	0.476	9909.72	381120	4.271	0.234	0.829	4.26532
132	ARL13B_KAN416-42_3.tif:0012-0696	2.6	2074.47	473	3755	29.804	112.143	0.475	5393.95	207447	4.051	0.247	0.778	2.32165
133	ARL13B_KAN416-42_3.tif:0013-0702	3.744	2195.27	460	3813	44.852	113.277	0.366	8219.59	316119	5.972	0.167	0.789	3.53786
134	ARL13B_KAN416-42_3.tif:0014-0759	4.238	900.871	453	1561	72.167	122.424	0.588	3818.12	146842	2.982	0.335	0.849	1.64339
135	ARL13B_KAN416-42_3.tif:0015-0817	3.016	1482.62	451	3782	75.799	131.946	0.32	4471.85	171984	6.967	0.144	0.674	1.92477
136	ARL13B_KAN416-42_3.tif:0016-0832	4.056	1404.94	478	2821	115.216	134.45	0.501	5698.79	219171	2.807	0.356	0.732	2.45286
137	ARL13B_KAN416-42_3.tif:0017-0922	2.106	1955.96	466	3777	56.673	148.699	0.457	4119.51	158433	4.749	0.211	0.79	1.77311
138	ARL13B_KAN416-42_3.tif:0018-0932	2.548	2292.69	398	3711	22.692	150.273	0.572	5842.14	224684	3.258	0.307	0.871	2.51456
139	ARL13B_KAN416-42_3.tif:0019-0932	2.704	2397.1	465	3712	127.564	150.336	0.459	6482.14	249298	4.701	0.213	0.8	2.79003
140	ARL13B_KAN416-42_3.tif:0020-1007	2.678	800.951	452	1395	84.176	162.312	0.553	2145.08	82498	2.96	0.338	0.877	0.923279
141	ARL13B_KAN416-42_4.tif:0001-0045	2.028	1570.35	293	3717	208.775	7.192	0.422	3184.85	122487	4.225	0.237	0.69	1.37082
142	ARL13B_KAN416-42_4.tif:0002-0109	2.132	1292.11	278	3051	184.728	17.484	0.406	2754.94	105953	5.087	0.197	0.759	1.18578
143	ARL13B_KAN416-42_4.tif:0003-0121	2.626	2202.41	456	3709	138.507	19.59	0.55	5783.87	222443	3.687	0.271	0.835	2.48948
144	ARL13B_KAN416-42_4.tif:0004-0143	1.95	1519.52	461	3787	11.42	23.126	0.443	2963.24	113964	5.121	0.195	0.806	1.27543
145	ARL13B_KAN416-42_4.tif:0005-0226	3.276	1837.05	278	3714	88.74	36.632	0.336	6018.53	231468	5.949	0.168	0.735	2.59048
146	ARL13B_KAN416-42_4.tif:0006-0229	2.366	2223.07	455	3629	39.027	36.987	0.574	5260.09	202299	3.273	0.305	0.827	2.26404
147	ARL13B_KAN416-42_4.tif:0007-0237	3.406	2246.18	457	3698	2.861	38.303	0.428	7650.96	294250	5.102	0.196	0.829	3.29311
148	ARL13B_KAN416-42_4.tif:0008-0295	3.822	2077.33	90	3602	146.01	47.844	0.351	7940.02	305367	5.491	0.182	0.728	3.41753
149	ARL13B_KAN416-42_4.tif:0009-0303	2.574	1979.42	462	3677	167.492	48.991	0.439	5095.35	195963	4.828	0.207	0.783	2.19313
150	ARL13B_KAN416-42_4.tif:0010-0371	2.262	2029.08	458	3796	95.863	59.899	0.582	4590.06	176530	3.503	0.285	0.813	1.97564
151	ARL13B_KAN416-42_4.tif:0011-0414	2.756	2155.81	450	3747	206.009	66.806	0.47	5941.77	228516	4.856	0.206	0.797	2.55745
152	ARL13B_KAN416-42_4.tif:0012-0422	2.288	2244.49	455	3763	6.245	68.016	0.541	5135.7	197515	3.344	0.299	0.804	2.2105
153	ARL13B_KAN416-42_4.tif:0013-0464	2.6	1997.68	453	3699	121.916	74.788	0.566	5194.28	199768	3.25	0.308	0.806	2.23571
154	ARL13B_KAN416-42_4.tif:0014-0519	3.042	1693.52	254	3730	163.805	83.749	0.435	5152	198142	5.485	0.182	0.867	2.21751
155	ARL13B_KAN416-42_4.tif:0015-0561	3.146	2107.71	343	3711	141.541	90.631	0.459	6631.26	255033	4.937	0.203	0.852	2.85421
156	ARL13B_KAN416-42_4.tif:0016-0643	3.354	2055.74	224	3574	169.032	103.863	0.392	6895.35	265190	2.971	0.337	0.626	2.96788
157	ARL13B_KAN416-42_4.tif:0017-0713	2.522	2146.68	466	3782	49.062	114.979	0.512	5414.25	208228	3.965	0.252	0.779	2.33039
158	ARL13B_KAN416-42_4.tif:0018-0746	2.678	2046.13	350	3676	24.556	120.419	0.553	5479.86	210751	3.643	0.274	0.858	2.35863
159	ARL13B_KAN416-42_4.tif:0019-0772	3.094	2263.15	459	3739	204.197	124.502	0.421	7002.61	269315	4.794	0.209	0.765	3.01405
160	ARL13B_KAN416-42_4.tif:0020-0798	2.834	2197.49	243	3657	170.929	128.742	0.545	6228.08	239527	3.75	0.267	0.924	2.68068
161	ARL13B_KAN416-42_4.tif:0021-0963	1.638	915.841	287	2131	53.283	155.346	0.458	1500.24	57698	4.698	0.213	0.759	0.645729
162	ARL13B_KAN416-42_5.tif:0001-0137	3.614	1557.8	454	3562	27.87	22.166	0.435	5630.22	216534	4.494	0.223	0.732	2.42335
163	ARL13B_KAN416-42_5.tif:0002-0209	2.73	1689.38	452	3746	119.882	33.613	0.489	4612.29	177385	3.858	0.259	0.795	1.98521
164	ARL13B_KAN416-42_5.tif:0003-0225	1.69	1055.91	453	2193	81.559	36.409	0.37	1784.59	68634	6.031	0.166	0.65	0.76812
165	ARL13B_KAN416-42_5.tif:0004-0249	2.496	1745.48	320	3603	57.699	39.933	0.569	4356.98	167566	2.415	0.414	0.765	1.87532
166	ARL13B_KAN416-42_5.tif:0005-0288	1.716	1866.29	462	3702	198.816	46.464	0.542	3202.74	123175	3.71	0.27	0.786	1.37852
167	ARL13B_KAN416-42_5.tif:0006-0306	2.626	1763.82	451	3745	77.6	49.319	0.521	4632.07	178146	3.656	0.274	0.783	1.99373
168	ARL13B_KAN416-42_5.tif:0007-0522	3.094	2066.4	74	3444	194.513	84.169	0.557	6393.84	245902	3.546	0.282	0.829	2.75202
169	ARL13B_KAN416-42_5.tif:0008-0537	2.886	1800.03	318	3683	181.958	86.691	0.357	5195.19	199803	5.046	0.198	0.696	2.2361
170	ARL13B_KAN416-42_5.tif:0009-0688	1.742	1002.63	261	2986	116.787	111.033	0.369	1746.68	67176	4.738	0.211	0.728	0.751803
171	ARL13B_KAN416-42_5.tif:0010-0747	4.03	1037.69	450	1871	89.187	120.509	0.599	4182.14	160842	3.118	0.321	0.864	1.80007
172	ARL13B_KAN416-42_5.tif:0011-0851	3.926	1486.21	455	3489	23.027	137.336	0.541	5835.22	224418	3.646	0.274	0.91	2.51158
173	ARL13B_KAN416-42_5.tif:0012-0843	2.626	2240.12	473	3668	122.059	135.978	0.473	5882.91	226252	4.277	0.234	0.849	2.53211
174	ARL13B_KAN416-42_5.tif:0013-0953	2.288	2136.61	453	3703	69.145	153.761	0.524	4888.87	188022	3.95	0.253	0.8	2.10425
175	ARL13B_KAN416-42_5.tif:0014-0980	3.146	2072.5	458	3672	103.322	158.063	0.527	6520.47	250772	3.523	0.284	0.801	2.80652
176	ARL13B_KAN416-42_5.tif:0015-1015	2.522	2279.49	465	3797	119.545	163.803	0.485	5749.23	221111	4.603	0.217	0.928	2.47457
177	ARL13B_KAN416-42_6.tif:0001-0019	2.99	2092.69	409	3648	3.89	2.994	0.551	6257.51	240659	3.505	0.285	0.855	2.69334
178	ARL13B_KAN416-42_6.tif:0002-0021	3.458	2183.18	462	3746	169.651	3.486	0.486	7549.89	290363	4.345	0.23	0.801	3.24961
179	ARL13B_KAN416-42_6.tif:0003-0205	2.834	1957.44	84	3633	222.19	33.041	0.459	5547.72	213361	3.921	0.255	0.734	2.38784
180	ARL13B_KAN416-42_6.tif:0004-0224	0.884	873.471	104	3049	222.378	36.258	0.414	772.194	29698	1.75	0.571	0.553	0.332366
181	ARL13B_KAN416-42_6.tif:0005-0244	3.848	2195.22	450	3670	72.436	39.224	0.545	8447.73	324893	3.397	0.294	0.771	3.63605
182	ARL13B_KAN416-42_6.tif:0006-0335	3.224	2203.07	318	3636	158.054	54.002	0.57	7103.11	273180	3.381	0.296	0.846	3.0573
183	ARL13B_KAN416-42_6.tif:0007-0425	1.69	1294.34	323	3693	34.494	68.709	0.435	2187.56	84132	3.912	0.256	0.85	0.941566
184	ARL13B_KAN416-42_6.tif:0008-0429	3.588	1920.72	451	3744	87.754	69.052	0.368	6891.98	265060	5.816	0.172	0.738	2.96643
185	ARL13B_KAN416-42_6.tif:0009-0493	2.288	2136.28	451	3615	11.06	79.57	0.472	4888.11	187993	4.347	0.23	0.804	2.10393
186	ARL13B_KAN416-42_6.tif:0010-0520	3.198	2180.84	471	3763	143.286	83.818	0.394	6974.74	268243	5.608	0.178	0.778	3.00205
187	ARL13B_KAN416-42_6.tif:0011-0538	3.276	2400.29	458	3588	173.557	86.68	0.519	7863.81	302436	3.694	0.271	0.805	3.38472
188	ARL13B_KAN416-42_6.tif:0012-0599	3.588	2209.23	371	3683	221.86	96.668	0.459	7927.2	304874	4.31	0.232	0.834	3.41201
189	ARL13B_KAN416-42_6.tif:0013-0693	3.094	2253.23	466	3805	80.215	111.748	0.427	6971.9	268134	5.276	0.19	0.844	3.00083
190	ARL13B_KAN416-42_6.tif:0014-0762	2.444	2137	206	3615	178.897	122.71	0.502	5223.14	200878	3.327	0.301	0.793	2.24813
191	ARL13B_KAN416-42_6.tif:0015-0840	3.172	2053.89	456	3709	199.396	135.422	0.453	6515.34	250575	4.643	0.215	0.813	2.80432
192	ARL13B_KAN416-42_6.tif:0016-0842	3.146	2374.04	367	3656	100.162	135.88	0.532	7469.18	287259	3.581	0.279	0.796	3.21487
193	ARL13B_KAN416-42_6.tif:0017-0930	3.042	2081.99	454	3711	139.278	149.916	0.535	6333.8	243593	3.496	0.286	0.775	2.72618
										209378				2.34326
194	ARL13B_KAN416-43_1.tif:0001-0186	2.808	1578.68	331	3707	192.076	29.945	0.486	4433.22	170498	3.909	0.256	0.766	1.90813
195	ARL13B_KAN416-43_1.tif:0002-0199	1.456	770.607	454	1513	30.635	32.178	0.355	1122.07	43154	6.431	0.155	0.683	0.48296
196	ARL13B_KAN416-43_1.tif:0003-0220	2.028	997.487	172	2650	12.728	35.5	0.308	2023.03	77804	7.15	0.14	0.678	0.870746
197	ARL13B_KAN416-43_1.tif:0004-0284	3.198	2053.08	404	3665	125.685	45.772	0.558	6566.15	252529	3.59	0.279	0.84	2.82619
198	ARL13B_KAN416-43_1.tif:0005-0360	1.976	1251.01	451	3715	95.696	57.986	0.534	2472.15	95077	3.319	0.301	0.734	1.06406
199	ARL13B_KAN416-43_1.tif:0006-0395	2.6	1988.37	452	3774	166.478	63.673	0.483	5170.07	198837	4.306	0.232	0.806	2.22529
200	ARL13B_KAN416-43_1.tif:0007-0426	2.522	1316.21	453	3678	39.72	68.948	0.377	3319.67	127672	4.896	0.204	0.7	1.42885
201	ARL13B_KAN416-43_1.tif:0008-0434	2.288	801.943	466	1689	59.901	70.096	0.484	1834.96	70571	4.367	0.229	0.807	0.789798
202	ARL13B_KAN416-43_1.tif:0009-0584	2.626	1525.25	455	3672	102.385	94.243	0.412	4005.54	154050	5.74	0.174	0.721	1.72406
203	ARL13B_KAN416-43_1.tif:0010-0595	2.262	1872.75	451	3636	159.79	96.076	0.535	4236.41	162929	3.188	0.314	0.802	1.82343
204	ARL13B_KAN416-43_1.tif:0011-0603	1.56	1256.3	457	2914	182.476	97.226	0.41	1959.95	75378	5.348	0.187	0.714	0.843596
205	ARL13B_KAN416-43_1.tif:0012-0605	1.924	1027.74	300	2419	10.255	97.558	0.443	1977.5	76053	4.216	0.237	0.722	0.85115
206	ARL13B_KAN416-43_1.tif:0013-0629	2.99	1651.4	460	3755	131.499	101.382	0.366	4937.98	189911	5.836	0.171	0.735	2.1254
207	ARL13B_KAN416-43_1.tif:0014-0657	1.768	852.529	454	1837	73.179	105.946	0.443	1507.36	57972	4.805	0.208	0.743	0.648796
208	ARL13B_KAN416-43_1.tif:0015-0684	2.054	1351.84	219	3836	132.077	110.216	0.34	2776.84	106795	5.934	0.169	0.709	1.1952
209	ARL13B_KAN416-43_1.tif:0016-0691	2.106	1286.05	449	3173	86.885	111.532	0.344	2708.58	104170	6.367	0.157	0.711	1.16582
210	ARL13B_KAN416-43_1.tif:0017-0730	2.73	2141.83	437	3664	49.954	117.815	0.547	5847.54	224892	3.441	0.291	0.787	2.51689
211	ARL13B_KAN416-43_1.tif:0018-0879	3.302	2076.13	452	3696	166.58	141.626	0.464	6855.78	263668	4.212	0.237	0.749	2.95085
212	ARL13B_KAN416-43_1.tif:0019-0893	2.496	2121.35	452	3669	122.594	144.169	0.544	5295.22	203650	3.644	0.274	0.846	2.27916
213	ARL13B_KAN416-43_1.tif:0020-0936	1.638	1942.6	461	3651	206.588	150.895	0.561	3182.18	122384	3.595	0.278	0.818	1.36966
214	ARL13B_KAN416-43_2.tif:0001-0166	3.276	797.849	450	1620	103.531	26.922	0.446	2613.91	100529	4.53	0.221	0.757	1.12507
215	ARL13B_KAN416-43_2.tif:0002-0286	3.588	2030.18	295	3675	111.782	45.926	0.481	7284.73	280165	3.579	0.279	0.798	3.13548
216	ARL13B_KAN416-43_2.tif:0003-0325	2.366	1048.34	456	2242	176.222	52.485	0.414	2480.52	95399	3.722	0.269	0.669	1.06766
217	ARL13B_KAN416-43_2.tif:0004-0330	1.482	1392.91	249	3649	222.925	53.485	0.417	2064.42	79396	3.802	0.263	0.659	0.888563
218	ARL13B_KAN416-43_2.tif:0005-0404	2.522	1831.65	482	3690	123.159	65.126	0.425	4619.7	177670	5.112	0.196	0.805	1.9884
219	ARL13B_KAN416-43_2.tif:0006-0487	2.522	1181.45	458	2007	174.512	78.581	0.586	2979.8	114601	3.502	0.286	0.847	1.28256
220	ARL13B_KAN416-43_2.tif:0007-0694	3.432	1260.77	455	2604	132.981	111.936	0.502	4327.23	166422	3.821	0.262	0.776	1.86252
221	ARL13B_KAN416-43_2.tif:0008-0715	2.704	1597.08	379	3747	205.515	115.263	0.378	4318.76	166096	4.705	0.213	0.735	1.85887
222	ARL13B_KAN416-43_2.tif:0009-0731	4.03	2128.23	477	3531	187.784	117.884	0.548	8577.27	329875	3.409	0.293	0.812	3.69181
223	ARL13B_KAN416-43_2.tif:0010-0752	3.458	1816.19	451	3582	80.506	121.274	0.585	6280.76	241553	3.086	0.324	0.842	2.70335
224	ARL13B_KAN416-43_2.tif:0011-0758	1.95	1352.79	452	3755	171.732	122.284	0.481	2638.09	101459	4.198	0.238	0.739	1.13548
225	ARL13B_KAN416-43_2.tif:0012-0853	2.106	1046.49	403	2213	50.596	137.497	0.414	2204.05	84766	5.272	0.19	0.79	0.948662
226	ARL13B_KAN416-43_2.tif:0013-0872	1.82	960.157	452	2138	146.228	140.559	0.536	1747.59	67211	3.87	0.258	0.778	0.752194
227	ARL13B_KAN416-43_2.tif:0014-0880	3.094	2068.09	455	3585	200.785	141.768	0.49	6399.06	246103	4.257	0.235	0.778	2.75427
228	ARL13B_KAN416-43_2.tif:0015-0916	3.718	983.287	229	1978	109.885	147.655	0.538	3656.08	140610	3.626	0.276	0.841	1.57364
229	ARL13B_KAN416-43_2.tif:0016-1013	1.248	1102.77	452	2933	67.322	163.561	0.345	1376.34	52933	4.793	0.209	0.615	0.592402
230	ARL13B_KAN416-43_3.tif:0001-0110	3.146	932.835	460	1471	47.919	17.817	0.544	2934.88	112873	3.603	0.278	0.84	1.26322
231	ARL13B_KAN416-43_3.tif:0002-0160	1.794	1546.78	452	3425	210.811	25.883	0.581	2775.09	106728	2.663	0.375	0.767	1.19445
232	ARL13B_KAN416-43_3.tif:0003-0227	1.976	892.513	342	1926	164.479	36.498	0.279	1763.71	67831	3.387	0.295	0.519	0.759133
233	ARL13B_KAN416-43_3.tif:0004-0290	2.6	948.3	375	2445	3.493	46.598	0.564	2465.73	94830	3.298	0.303	0.847	1.06129
234	ARL13B_KAN416-43_3.tif:0005-0464	1.95	1097.05	455	2583	136.694	74.995	0.431	2139.38	82279	4.184	0.239	0.647	0.920828
235	ARL13B_KAN416-43_3.tif:0006-0468	2.522	1672.8	455	3733	159.434	75.717	0.484	4219.07	162262	3.457	0.289	0.727	1.81596
236	ARL13B_KAN416-43_3.tif:0007-0556	2.964	1657.95	451	3699	94.896	89.707	0.478	4914.45	189006	4.125	0.242	0.784	2.11527
237	ARL13B_KAN416-43_3.tif:0008-0628	2.964	1009.49	456	1912	18.704	101.145	0.503	2992.31	115082	3.704	0.27	0.757	1.28794
238	ARL13B_KAN416-43_3.tif:0009-0635	1.118	573.488	58	1221	156.193	102.429	0.504	641.199	24660	4.007	0.25	0.819	0.275983
239	ARL13B_KAN416-43_3.tif:0010-0701	3.406	1806.48	453	3621	211.246	113.133	0.431	6153.24	236649	4.622	0.216	0.787	2.64847
240	ARL13B_KAN416-43_4.tif:0001-0215	4.004	1546.76	424	3473	117.057	34.86	0.554	6193.6	238201	3.141	0.318	0.815	2.66584
241	ARL13B_KAN416-43_4.tif:0002-0234	4.81	1151.35	458	2254	102.82	37.647	0.435	5538.31	212999	4.941	0.202	0.766	2.38379
242	ARL13B_KAN416-43_4.tif:0003-0266	3.38	2003.98	222	3662	148.428	43.045	0.564	6773.88	260518	3.56	0.281	0.864	2.9156
243	ARL13B_KAN416-43_4.tif:0004-0409	2.028	823.244	395	1989	17.628	66.098	0.511	1669.64	64213	3.884	0.257	0.776	0.718642
244	ARL13B_KAN416-43_4.tif:0005-0436	3.9	1380.75	452	2874	61.65	70.227	0.544	5385.26	207113	3.466	0.288	0.875	2.31791
245	ARL13B_KAN416-43_4.tif:0006-0577	1.82	1143.54	271	3139	148.419	93.15	0.43	2081.37	80048	4.479	0.223	0.773	0.89586
246	ARL13B_KAN416-43_4.tif:0007-0606	1.352	1313.75	309	2923	82.312	97.99	0.572	1776.3	68315	2.426	0.412	0.8	0.76455
247	ARL13B_KAN416-43_4.tif:0008-0660	1.586	1412.05	455	3510	3.168	106.527	0.523	2239.64	86135	3.426	0.292	0.731	0.963983
248	ARL13B_KAN416-43_4.tif:0009-0682	1.378	926.415	472	1787	177.748	109.968	0.404	1276.68	49100	5.352	0.187	0.726	0.549504
249	ARL13B_KAN416-43_4.tif:0010-0733	2.47	1677.66	444	3787	142.617	118.243	0.498	4144.08	159378	4.27	0.234	0.856	1.78368
250	ARL13B_KAN416-43_4.tif:0011-0747	2.522	2114.79	212	3740	97.655	120.581	0.581	5333.83	205135	3.197	0.313	0.829	2.29578
251	ARL13B_KAN416-43_4.tif:0012-0758	2.34	1742.33	450	3689	186.14	122.172	0.577	4077.31	156810	3.069	0.326	0.738	1.75494
252	ARL13B_KAN416-43_4.tif:0013-0786	1.482	1573.04	462	3722	207.001	126.721	0.589	2331.38	89663	3.332	0.3	0.76	1.00347
253	ARL13B_KAN416-43_4.tif:0014-0855	0.988	1263.84	212	3760	217.675	137.771	0.48	1248.75	48026	2.462	0.406	0.691	0.537485
254	ARL13B_KAN416-43_4.tif:0015-0880	1.924	1536.15	455	3813	123.698	141.824	0.421	2955.73	113675	5.21	0.192	0.767	1.2722
255	ARL13B_KAN416-43_4.tif:0016-0974	2.34	848.556	460	1844	177.56	157.135	0.439	1985.74	76370	4.086	0.245	0.698	0.854698
256	ARL13B_KAN416-43_4.tif:0017-1032	2.366	1672.84	467	3772	196.402	166.585	0.323	3958.17	152228	6.665	0.15	0.749	1.70367
257	ARL13B_KAN416-43_5.tif:0001-0073	3.016	1990.23	192	3623	189.597	11.917	0.577	6002.9	230867	2.454	0.407	0.758	2.58376
258	ARL13B_KAN416-43_5.tif:0002-0162	3.016	1900.72	454	3724	75.804	26.142	0.566	5732.93	220484	3.234	0.309	0.82	2.46755
259	ARL13B_KAN416-43_5.tif:0003-0173	1.56	1039.2	487	2402	138.162	27.899	0.446	1621.25	62352	4.212	0.237	0.645	0.697815
260	ARL13B_KAN416-43_5.tif:0004-0176	2.34	1995.26	294	3612	172.96	28.396	0.59	4669.18	179573	3.295	0.303	0.818	2.0097
261	ARL13B_KAN416-43_5.tif:0005-0197	3.25	2274.14	482	3686	106.279	31.822	0.486	7391.41	284268	3.966	0.252	0.809	3.1814
262	ARL13B_KAN416-43_5.tif:0006-0238	2.756	803.755	451	1495	202.98	38.16	0.303	2215.28	85198	6.612	0.151	0.639	0.953496
263	ARL13B_KAN416-43_5.tif:0007-0257	2.86	1129.32	194	2623	173.797	41.56	0.539	3230.05	124225	3.456	0.289	0.815	1.39027
264	ARL13B_KAN416-43_5.tif:0008-0263	2.574	782.707	457	1255	86.059	42.519	0.367	2014.81	77488	5.734	0.174	0.78	0.86721
265	ARL13B_KAN416-43_5.tif:0009-0311	3.198	1765.32	472	3765	155.828	50.172	0.405	5645.82	217134	5.298	0.189	0.769	2.43006
266	ARL13B_KAN416-43_5.tif:0010-0354	2.288	1503.95	273	3589	55.723	56.844	0.423	3441.26	132348	3.643	0.275	0.64	1.48118
267	ARL13B_KAN416-43_5.tif:0011-0412	2.418	1259.77	448	2893	99.629	66.457	0.501	3046.32	117159	3.946	0.253	0.775	1.31119
268	ARL13B_KAN416-43_5.tif:0012-0420	3.198	1216.83	463	3515	170.247	67.795	0.555	3891.65	149670	3.455	0.289	0.771	1.67504
269	ARL13B_KAN416-43_5.tif:0013-0463	2.704	1176.89	455	3706	114.508	74.617	0.386	3182.51	122397	5.576	0.179	0.732	1.36981
270	ARL13B_KAN416-43_5.tif:0014-0485	1.456	2067.66	456	3826	74.595	78.221	0.599	3010.7	115789	3.104	0.322	0.8	1.29586
271	ARL13B_KAN416-43_5.tif:0015-0490	3.302	1526.02	455	3688	207.908	79.03	0.336	5039.23	193805	6.745	0.148	0.715	2.16898
272	ARL13B_KAN416-43_5.tif:0016-0529	2.002	1896.77	507	3750	134.513	85.216	0.526	3797.55	146051	3.045	0.328	0.716	1.63454
273	ARL13B_KAN416-43_5.tif:0017-0559	3.328	1935.84	0	3608	165.87	90.139	0.485	6442.88	247788	3.334	0.3	0.731	2.77313
274	ARL13B_KAN416-43_5.tif:0018-0559	2.366	2160.39	457	3779	103.217	90.152	0.572	5111.78	196595	3.535	0.283	0.897	2.2002
275	ARL13B_KAN416-43_5.tif:0019-0640	1.898	850.027	263	2223	79.645	103.51	0.2	1613.45	62052	9.673	0.103	0.533	0.694457
276	ARL13B_KAN416-43_5.tif:0020-0713	1.976	1435.67	322	3829	64.767	115.113	0.428	2837.06	109111	4.351	0.23	0.72	1.22112
277	ARL13B_KAN416-43_5.tif:0021-0721	2.288	1849.85	457	3767	17.208	116.203	0.535	4232.72	162787	3.732	0.268	0.815	1.82184
278	ARL13B_KAN416-43_5.tif:0022-0785	2.392	995.326	453	2172	98.363	126.581	0.521	2380.96	91570	3.768	0.265	0.814	1.02481
279	ARL13B_KAN416-43_5.tif:0023-0808	2.34	1632.33	456	3741	163.359	130.301	0.46	3819.89	146910	4.294	0.233	0.695	1.64415
280	ARL13B_KAN416-43_5.tif:0024-0875	2.392	1846.86	471	3814	140.89	141.16	0.371	4417.95	169911	5.566	0.18	0.659	1.90157
281	ARL13B_KAN416-43_5.tif:0025-0976	2.73	1096.05	452	2995	217.891	157.415	0.588	2992.39	115085	3.318	0.301	0.802	1.28798
282	ARL13B_KAN416-43_5.tif:0026-1020	2.574	1874.72	455	3750	146.391	164.554	0.547	4825.81	185597	3.505	0.285	0.792	2.07712
283	ARL13B_KAN416-43_6.tif:0001-0012	2.314	1533.97	473	3730	168.998	2.03	0.411	3549.81	136523	5.359	0.187	0.733	1.5279
284	ARL13B_KAN416-43_6.tif:0002-0016	2.964	1386.63	468	2914	148.831	2.764	0.488	4110.22	158076	3.811	0.262	0.735	1.76911
285	ARL13B_KAN416-43_6.tif:0003-0028	2.21	1445.95	400	3769	221.632	4.799	0.364	3195.75	122906	4.39	0.228	0.586	1.37551
286	ARL13B_KAN416-43_6.tif:0004-0075	2.496	2079.5	476	3710	222.423	12.22	0.507	5190.74	199632	3.862	0.259	0.777	2.23419
287	ARL13B_KAN416-43_6.tif:0005-0080	2.938	2169.44	454	3720	176.223	12.998	0.482	6374.21	245147	4.325	0.231	0.807	2.74357
288	ARL13B_KAN416-43_6.tif:0006-0185	1.482	1147.65	460	2941	13.679	29.79	0.462	1700.92	65416	4.871	0.205	0.74	0.732106
289	ARL13B_KAN416-43_6.tif:0007-0203	3.614	1433.93	201	3512	160.068	32.774	0.508	5182.53	199316	3.411	0.293	0.83	2.23065
290	ARL13B_KAN416-43_6.tif:0008-0306	3.146	2059.29	454	3637	97.292	49.307	0.435	6478.91	249174	4.442	0.225	0.763	2.78864
291	ARL13B_KAN416-43_6.tif:0009-0334	3.744	1755.44	282	3805	172.618	53.679	0.364	6572.75	252783	4.573	0.219	0.643	2.82903
292	ARL13B_KAN416-43_6.tif:0010-0329	3.666	2259.6	448	3733	128.571	53.088	0.52	8284.18	318603	3.956	0.253	0.895	3.56566
293	ARL13B_KAN416-43_6.tif:0011-0377	2.652	1425.52	450	3363	198.545	60.813	0.349	3780.71	145403	6.768	0.148	0.742	1.62728
294	ARL13B_KAN416-43_6.tif:0012-0529	5.278	1613.77	397	2856	189.251	85.284	0.562	8518.01	327596	3.193	0.313	0.866	3.6663
295	ARL13B_KAN416-43_6.tif:0013-0623	2.964	1750.17	454	3675	59.578	100.568	0.472	5187.83	199520	4.358	0.229	0.784	2.23294
296	ARL13B_KAN416-43_6.tif:0014-0695	2.028	1284.26	458	3718	223.021	112.013	0.393	2604.63	100172	5.16	0.194	0.703	1.12108
297	ARL13B_KAN416-43_6.tif:0015-0720	0.728	491.821	212	854	23.22	116.503	0.161	358.068	13771	3.232	0.309	0.335	0.154119
298	ARL13B_KAN416-43_6.tif:0016-0813	2.626	2088.13	455	3784	96.259	131.204	0.466	5483.76	210901	4.089	0.245	0.729	2.36031
299	ARL13B_KAN416-43_6.tif:0017-0816	1.612	1065.37	459	2141	79.075	131.611	0.364	1717.48	66053	5.842	0.171	0.678	0.739235
300	ARL13B_KAN416-43_6.tif:0018-0834	1.924	1222.54	13	3457	150.276	134.681	0.38	2352.31	90468	4.62	0.216	0.718	1.01248
301	ARL13B_KAN416-43_6.tif:0019-0949	2.08	1384.24	460	3625	219.975	153.131	0.425	2879.39	110739	4.526	0.221	0.766	1.23934
302	ARL13B_KAN416-43_6.tif:0020-0986	1.144	612	461	856	210.417	159.117	0.431	700.17	26928	4.324	0.231	0.721	0.301366
303	ARL13B_KAN416-43_6.tif:0021-1024	2.418	1534.34	458	3741	4.055	165.241	0.432	3710.27	142694	4.941	0.202	0.809	1.59697
										145554				1.62897
304	ARL13B_KAN416-44_1.tif:0001-0059	1.56	1077.73	411	2184	127.842	9.616	0.408	1681.37	64664	5.213	0.192	0.75	0.723689
305	ARL13B_KAN416-44_1.tif:0002-0084	2.132	1253.38	453	3709	96.994	13.649	0.474	2672.36	102777	4.29	0.233	0.752	1.15023
306	ARL13B_KAN416-44_1.tif:0003-0183	4.238	1500.22	338	3279	173.612	29.898	0.392	6358.32	244536	4.529	0.221	0.731	2.73673
307	ARL13B_KAN416-44_1.tif:0004-0256	3.146	1002.41	455	1714	159.649	41.358	0.539	3153.78	121292	3.61	0.277	0.864	1.35744
308	ARL13B_KAN416-44_1.tif:0005-0317	1.404	1036.46	344	2584	31.99	51.143	0.458	1455.28	55969	5.22	0.192	0.885	0.626379
309	ARL13B_KAN416-44_1.tif:0006-0435	3.094	2150.72	451	3814	125.93	70.159	0.438	6654.74	255936	4.643	0.215	0.756	2.86432
310	ARL13B_KAN416-44_1.tif:0007-0479	2.652	1555.29	450	3511	217.92	77.446	0.418	4124.89	158640	3.623	0.276	0.636	1.77543
311	ARL13B_KAN416-44_1.tif:0008-0480	0.702	924.296	458	1761	55.342	77.499	0.594	648.895	24956	3.104	0.322	0.857	0.279296
312	ARL13B_KAN416-44_1.tif:0009-0516	2.808	1326.45	455	3870	109.55	83.369	0.43	3724.91	143257	4.937	0.203	0.725	1.60327
313	ARL13B_KAN416-44_1.tif:0010-0548	2.054	1513.47	462	3780	20.331	88.403	0.534	3108.85	119564	3.57	0.28	0.771	1.3381
314	ARL13B_KAN416-44_1.tif:0011-0610	2.184	1125.19	249	3477	78.012	98.649	0.313	2457.56	94516	6.662	0.15	0.659	1.05778
315	ARL13B_KAN416-44_1.tif:0012-0694	1.508	1562.38	462	3269	158.609	111.974	0.551	2356.21	90618	3.493	0.286	0.768	1.01415
316	ARL13B_KAN416-44_1.tif:0013-0824	3.042	1838.98	476	3803	7.156	132.958	0.563	5594.52	215161	3.509	0.285	0.839	2.40798
317	ARL13B_KAN416-44_1.tif:0014-0876	1.976	1057.17	455	3047	79.963	141.251	0.489	2089.1	80345	4.199	0.238	0.792	0.899184
318	ARL13B_KAN416-44_1.tif:0015-0937	0.91	1030.94	456	2037	104.465	151.006	0.492	938.214	36083	3.705	0.27	0.814	0.403824
319	ARL13B_KAN416-44_1.tif:0016-0965	2.366	1076.46	410	2522	46.708	155.715	0.326	2547.06	97958	5.84	0.171	0.672	1.0963
320	ARL13B_KAN416-44_1.tif:0017-1030	1.638	1187.03	338	3781	128.945	166.158	0.579	1944.47	74783	3.027	0.33	0.783	0.836937
321	ARL13B_KAN416-44_2.tif:0001-0104	1.716	672.803	338	1451	69.951	16.809	0.509	1154.6	44405	3.919	0.255	0.767	0.49696
322	ARL13B_KAN416-44_2.tif:0002-0183	2.86	1204.67	132	3012	37.029	29.504	0.28	3445.57	132514	8.22	0.122	0.705	1.48304
323	ARL13B_KAN416-44_2.tif:0003-0318	0.91	614.543	184	1335	210.756	51.303	0.365	559.268	21509	5.458	0.183	0.66	0.240719
324	ARL13B_KAN416-44_2.tif:0004-0346	0.78	946.667	492	1937	93.45	55.879	0.566	738.444	28400	3.774	0.265	0.732	0.31784
325	ARL13B_KAN416-44_2.tif:0005-0488	2.47	1778.66	131	3634	215.241	78.538	0.461	4393.56	168973	2.919	0.343	0.717	1.89107
326	ARL13B_KAN416-44_2.tif:0006-0505	1.716	994.273	468	2443	89.665	81.465	0.43	1706.28	65622	4.888	0.205	0.691	0.734411
327	ARL13B_KAN416-44_2.tif:0007-0507	2.86	1021.64	417	2179	59.967	81.905	0.463	2922.08	112381	4.579	0.218	0.753	1.25772
328	ARL13B_KAN416-44_2.tif:0008-0788	3.406	1818.14	183	3760	221.623	127.287	0.458	6192.98	238177	3.312	0.302	0.74	2.66557
329	ARL13B_KAN416-44_2.tif:0009-0803	2.08	1405.96	465	3064	22.992	129.538	0.592	2924.58	112477	3.089	0.324	0.8	1.25879
330	ARL13B_KAN416-44_2.tif:0010-0860	2.912	1896.77	330	3760	187.558	138.698	0.37	5523.72	212438	5.242	0.191	0.727	2.37751
331	ARL13B_KAN416-44_2.tif:0011-0928	2.938	2005	462	3807	76.67	149.699	0.521	5891.05	226565	3.827	0.261	0.81	2.53561
332	ARL13B_KAN416-44_2.tif:0012-0934	3.354	1762.29	374	3762	104.224	150.517	0.464	5911.07	227335	4.016	0.249	0.723	2.54423
333	ARL13B_KAN416-44_3.tif:0001-0007	2.132	1767.67	450	3439	72.305	0.985	0.504	3768.9	144949	3.175	0.315	0.841	1.6222
334	ARL13B_KAN416-44_3.tif:0002-0107	2.002	1654.33	510	3636	213.264	17.274	0.475	3312.16	127383	4.576	0.219	0.748	1.42561
335	ARL13B_KAN416-44_3.tif:0003-0116	2.6	1523.37	79	3723	163.78	18.849	0.357	3961	152337	2.424	0.412	0.525	1.70488
336	ARL13B_KAN416-44_3.tif:0004-0136	0.754	592.552	456	820	68.601	21.905	0.558	446.811	17184	3.491	0.286	0.763	0.192315
337	ARL13B_KAN416-44_3.tif:0005-0310	3.016	2150.36	465	3504	203.37	49.878	0.464	6485.88	249442	4.22	0.237	0.789	2.79164
338	ARL13B_KAN416-44_3.tif:0006-0324	2.73	844.143	459	2161	65.207	52.327	0.394	2304.65	88635	5.013	0.199	0.707	0.991962
339	ARL13B_KAN416-44_3.tif:0007-0337	4.342	2184.36	400	3777	165.41	54.531	0.429	9485.08	364789	3.92	0.255	0.795	4.08255
340	ARL13B_KAN416-44_3.tif:0008-0442	3.302	1849.15	336	3746	21.157	71.522	0.289	6106.26	234842	5.126	0.195	0.579	2.62824
341	ARL13B_KAN416-44_3.tif:0009-0495	0.676	660.615	452	1179	69.393	80.067	0.323	446.603	17176	4.894	0.204	0.591	0.192226
342	ARL13B_KAN416-44_3.tif:0010-0540	1.534	1051.73	457	3221	167.037	87.115	0.269	1613.45	62052	7.91	0.126	0.593	0.694457
343	ARL13B_KAN416-44_3.tif:0011-0546	2.21	1205.87	450	2382	81.26	87.983	0.364	2665.13	102499	5.747	0.174	0.72	1.14712
344	ARL13B_KAN416-44_3.tif:0012-0681	1.014	601.769	353	1151	95.28	109.739	0.359	610.231	23469	6.13	0.163	0.672	0.262654
345	ARL13B_KAN416-44_3.tif:0013-0701	2.288	776.864	400	1514	43.316	112.952	0.446	1777.57	68364	4.356	0.23	0.796	0.765098
346	ARL13B_KAN416-44_3.tif:0014-0738	1.872	1451.1	0	3678	190.75	118.964	0.555	2716.62	104479	1.842	0.543	0.742	1.16928
347	ARL13B_KAN416-44_3.tif:0015-0782	1.846	1412.46	481	3826	78.389	126.339	0.361	2607.57	100285	4.553	0.22	0.599	1.12234
348	ARL13B_KAN416-44_3.tif:0016-0975	1.846	1158.38	453	2368	99.286	156.977	0.388	2138.5	82245	4.079	0.245	0.631	0.920448
349	ARL13B_KAN416-44_4.tif:0001-0030	2.73	1479.88	227	3733	204.741	4.665	0.27	4040.3	155387	7.433	0.135	0.619	1.73902
350	ARL13B_KAN416-44_4.tif:0002-0079	2.21	1456.77	455	3649	212.728	12.726	0.539	3219.64	123825	3.128	0.32	0.746	1.38579
351	ARL13B_KAN416-44_4.tif:0003-0181	2.262	1238.97	451	3812	23.338	29.324	0.503	2802.71	107790	4.01	0.249	0.77	1.20634
352	ARL13B_KAN416-44_4.tif:0004-0225	2.938	1051.88	455	2489	98.33	36.303	0.575	3090.6	118862	3.284	0.305	0.825	1.33025
353	ARL13B_KAN416-44_4.tif:0005-0233	3.016	873.302	268	1782	5.503	37.541	0.506	2634.04	101303	3.508	0.285	0.741	1.13374
354	ARL13B_KAN416-44_4.tif:0006-0355	4.368	1915.96	444	3665	154.479	57.389	0.422	8369.41	321881	3.899	0.256	0.721	3.60234
355	ARL13B_KAN416-44_4.tif:0007-0466	3.328	1375.95	298	3333	37.181	75.209	0.443	4579.45	176122	2.675	0.374	0.749	1.97108
356	ARL13B_KAN416-44_4.tif:0008-0534	3.042	1330.35	411	3579	147.004	86.188	0.389	4047.17	155651	5.629	0.178	0.755	1.74197
357	ARL13B_KAN416-44_4.tif:0009-0611	1.742	863.672	166	1694	132.31	98.349	0.432	1504.61	57866	3.976	0.251	0.843	0.647609
358	ARL13B_KAN416-44_4.tif:0010-0719	1.274	650.286	139	1471	209.643	116.079	0.423	828.514	31864	5.058	0.198	0.778	0.356607
359	ARL13B_KAN416-44_4.tif:0011-0723	1.664	863.766	450	1578	4.092	116.579	0.563	1437.39	55281	3.529	0.283	0.8	0.618679
360	ARL13B_KAN416-44_4.tif:0012-0730	3.016	2099.2	332	3822	142.56	117.849	0.533	6331.56	243507	3.07	0.326	0.776	2.72522
361	ARL13B_KAN416-44_4.tif:0013-0796	2.158	1967.98	467	3753	168.634	128.327	0.6	4247.15	163342	3.075	0.325	0.818	1.82805
362	ARL13B_KAN416-44_4.tif:0014-0886	2.288	913.182	461	2034	64.491	142.988	0.429	2089.49	80360	4.482	0.223	0.667	0.899352
363	ARL13B_KAN416-44_4.tif:0015-0933	1.664	1295.06	389	2726	125.972	150.6	0.581	2155.11	82884	3.335	0.3	0.831	0.927599
364	ARL13B_KAN416-44_5.tif:0001-0030	3.094	1783.74	458	3733	14.955	4.811	0.6	5519.22	212265	3.145	0.318	0.872	2.37557
365	ARL13B_KAN416-44_5.tif:0002-0074	1.768	1946.22	459	3746	175.046	12.013	0.483	3441.12	132343	4.338	0.231	0.782	1.48112
366	ARL13B_KAN416-44_5.tif:0003-0100	2.262	1847.14	464	3624	187.31	16.33	0.524	4178.48	160701	3.293	0.304	0.77	1.79849
367	ARL13B_KAN416-44_5.tif:0004-0213	2.106	1517.99	458	3437	147.877	34.397	0.5	3197.07	122957	3.893	0.257	0.747	1.37608
368	ARL13B_KAN416-44_5.tif:0005-0344	1.274	1014.33	385	2358	28.727	55.531	0.347	1292.33	49702	5.403	0.185	0.69	0.556242
369	ARL13B_KAN416-44_5.tif:0006-0365	2.288	1472.6	217	3763	98.428	58.889	0.583	3369.52	129589	3.588	0.279	0.884	1.4503
370	ARL13B_KAN416-44_5.tif:0007-0377	2.236	1454.28	473	3725	69.913	60.844	0.457	3251.96	125068	4.584	0.218	0.754	1.3997
371	ARL13B_KAN416-44_5.tif:0008-0512	2.21	1807.12	328	3760	106.538	82.483	0.443	3993.97	153605	4.625	0.216	0.7	1.71908
372	ARL13B_KAN416-44_5.tif:0009-0524	2.574	1931.55	291	3778	31.822	84.452	0.584	4972.1	191223	3.757	0.266	0.917	2.14008
373	ARL13B_KAN416-44_5.tif:0010-0603	2.652	2136.16	452	3734	87.978	97.321	0.514	5665.43	217888	3.809	0.263	0.764	2.4385
374	ARL13B_KAN416-44_5.tif:0011-0602	3.094	2108.32	96	3603	132.834	97.138	0.552	6523.53	250890	3.47	0.288	0.799	2.80784
375	ARL13B_KAN416-44_5.tif:0012-0663	2.444	1425.88	451	3246	71.029	106.85	0.504	3485.07	134033	4.532	0.221	0.825	1.50004
376	ARL13B_KAN416-44_5.tif:0013-0847	1.768	634.5	453	1000	86.364	136.572	0.491	1121.86	43146	3.907	0.256	0.8	0.48287
377	ARL13B_KAN416-44_5.tif:0014-0882	2.574	2182.05	459	3719	68.045	142.284	0.495	5616.94	216023	4.329	0.231	0.839	2.41763
378	ARL13B_KAN416-44_5.tif:0015-0888	4.16	1318.14	264	3840	59.028	142.781	0.229	5483.81	210903	3.351	0.298	0.415	2.36033
379	ARL13B_KAN416-44_5.tif:0016-0896	0.676	427.154	154	662	17.589	144.567	0.403	288.773	11106	5.907	0.169	0.8	0.124293
380	ARL13B_KAN416-44_5.tif:0017-0944	1.326	625.255	289	1082	197.413	152.263	0.221	829.138	31888	7.316	0.137	0.596	0.356876
381	ARL13B_KAN416-44_5.tif:0018-1014	2.444	662.394	362	936	92.518	163.243	0.525	1618.99	62265	2.006	0.498	0.709	0.696841
382	ARL13B_KAN416-44_5.tif:0019-1024	2.002	1916.71	459	3736	206.051	165.121	0.458	3837.49	147587	4.651	0.215	0.786	1.65173
383	ARL13B_KAN416-44_6.tif:0001-0042	3.302	1627.19	467	3858	76.776	6.729	0.473	5373.3	206653	4.817	0.208	0.784	2.31276
384	ARL13B_KAN416-44_6.tif:0002-0145	3.952	2229.68	454	3747	100.893	23.337	0.538	8812.24	338912	3.555	0.281	0.847	3.79295
385	ARL13B_KAN416-44_6.tif:0003-0174	2.496	1839.16	451	3840	118.502	28.009	0.443	4590.81	176559	4.581	0.218	0.727	1.97597
386	ARL13B_KAN416-44_6.tif:0004-0229	2.184	1901.29	471	3703	196.911	36.869	0.509	4152.66	159708	3.733	0.268	0.824	1.78738
387	ARL13B_KAN416-44_6.tif:0005-0246	2.86	2276.48	455	3698	148.328	39.735	0.51	6511.13	250413	3.942	0.254	0.818	2.80251
388	ARL13B_KAN416-44_6.tif:0006-0315	3.198	1818.57	455	3657	43.272	50.864	0.412	5816.13	223684	4.886	0.205	0.728	2.50337
389	ARL13B_KAN416-44_6.tif:0007-0318	2.496	1597.13	461	3775	68.718	51.382	0.503	3986.69	153325	4.209	0.238	0.817	1.71594
390	ARL13B_KAN416-44_6.tif:0008-0334	2.73	1882.52	450	3690	217.082	53.789	0.422	5139.6	197665	2.951	0.339	0.646	2.21217
391	ARL13B_KAN416-44_6.tif:0009-0341	2.184	1651.76	504	3795	12.343	54.961	0.462	3607.66	138748	4.337	0.231	0.808	1.5528
392	ARL13B_KAN416-44_6.tif:0010-0375	3.146	1779.22	322	3696	106.895	60.485	0.432	5597.77	215286	4.15	0.241	0.684	2.40938
393	ARL13B_KAN416-44_6.tif:0011-0472	1.352	990.635	435	1828	15.362	76.113	0.463	1339.42	51513	4.411	0.227	0.8	0.57651
394	ARL13B_KAN416-44_6.tif:0012-0480	2.834	1901.03	487	3776	30.518	77.41	0.356	5387.84	207212	6.171	0.162	0.734	2.31902
395	ARL13B_KAN416-44_6.tif:0013-0599	2.73	1588.27	353	3764	173.653	96.603	0.46	4336.23	166768	4.88	0.205	0.854	1.86639
396	ARL13B_KAN416-44_6.tif:0014-0695	1.768	2104.57	450	3755	119.204	112.128	0.598	3721.11	143111	3.072	0.326	0.81	1.60163
397	ARL13B_KAN416-44_6.tif:0015-0827	1.872	1753.43	468	3770	72.155	133.365	0.445	3282.62	126247	4.664	0.214	0.783	1.4129
398	ARL13B_KAN416-44_6.tif:0016-0852	1.378	620.264	353	958	144.816	137.423	0.371	854.775	32874	5.578	0.179	0.697	0.367911
399	ARL13B_KAN416-44_6.tif:0017-0885	4.68	1687.53	480	3484	205.906	142.862	0.557	7898.11	303755	3.647	0.274	0.841	3.39948
400	ARL13B_KAN416-44_6.tif:0018-0890	2.262	1571.99	459	3811	21.323	143.647	0.361	3556.05	136763	6.188	0.162	0.707	1.53059
401	ARL13B_KAN416-44_6.tif:0019-0894	1.794	2056.62	467	3751	50.907	144.17	0.564	3689.8	141907	3.7	0.27	0.841	1.58816
										137369				1.53737
402	ARL13B_KAN416-45_1.tif:0001-0038	2.678	1544.22	450	3868	49.724	6.205	0.305	4135.68	159055	7.773	0.129	0.654	1.78007
403	ARL13B_KAN416-45_1.tif:0002-0053	2.782	2223.75	452	3656	170.034	8.547	0.591	6186.84	237941	2.987	0.335	0.839	2.66293
404	ARL13B_KAN416-45_1.tif:0003-0211	2.496	2226.68	451	3733	198.317	34.064	0.59	5558.12	213761	3.162	0.316	0.85	2.39231
405	ARL13B_KAN416-45_1.tif:0004-0244	2.834	2053.15	358	3742	93.767	39.318	0.473	5818.97	223793	4.357	0.23	0.816	2.50459
406	ARL13B_KAN416-45_1.tif:0005-0288	3.068	1947.71	451	3689	117.113	46.294	0.452	5975.94	229830	4.557	0.219	0.779	2.57215
407	ARL13B_KAN416-45_1.tif:0006-0305	2.47	1536.87	456	3865	67.906	49.338	0.459	3796.31	146003	4.366	0.229	0.709	1.634
408	ARL13B_KAN416-45_1.tif:0007-0385	2.678	1525.55	450	3305	129.682	62.193	0.439	4085.68	157132	4.644	0.215	0.757	1.75855
409	ARL13B_KAN416-45_1.tif:0008-0431	2.99	861.009	43	1696	190.587	69.577	0.47	2574.57	99016	2.017	0.496	0.667	1.10814
410	ARL13B_KAN416-45_1.tif:0009-0467	2.184	1958.73	454	3712	148.081	75.296	0.544	4278.12	164533	3.475	0.288	0.84	1.84138
411	ARL13B_KAN416-45_1.tif:0010-0517	3.224	2296.21	456	3661	222.425	83.37	0.536	7403.43	284730	2.687	0.372	0.729	3.18657
412	ARL13B_KAN416-45_1.tif:0011-0525	2.47	1866.77	456	3789	81.454	84.652	0.442	4611.2	177343	4.521	0.221	0.785	1.98474
413	ARL13B_KAN416-45_1.tif:0012-0537	2.132	1432.02	213	3775	103.554	86.666	0.402	3053.26	117426	4.766	0.21	0.71	1.31418
414	ARL13B_KAN416-45_1.tif:0013-0664	4.082	1969.22	0	3606	165.307	107.17	0.401	8038.85	309168	3.415	0.293	0.686	3.46006
415	ARL13B_KAN416-45_1.tif:0014-0683	3.484	1886.48	435	3731	35.097	110.327	0.416	6572.88	252788	4.133	0.242	0.698	2.82909
416	ARL13B_KAN416-45_1.tif:0015-0699	2.34	2250.58	451	3699	194.812	112.696	0.502	5266.67	202552	3.793	0.264	0.811	2.26687
417	ARL13B_KAN416-45_1.tif:0016-0807	3.484	1572.04	462	3627	217.55	130.189	0.401	5477.31	210653	5.185	0.193	0.82	2.35753
418	ARL13B_KAN416-45_1.tif:0017-0807	3.38	2213.14	454	3682	210.913	130.281	0.494	7480.86	287708	4.25	0.235	0.798	3.21989
419	ARL13B_KAN416-45_1.tif:0018-0810	2.678	2337.66	467	3721	139.482	130.759	0.517	6260.63	240779	3.998	0.25	0.837	2.69469
420	ARL13B_KAN416-45_1.tif:0019-0850	1.924	1699.27	473	3613	187.858	137.307	0.529	3269.59	125746	3.452	0.29	0.751	1.40729
421	ARL13B_KAN416-45_1.tif:0020-1005	1.69	1866.86	461	3711	195.354	161.991	0.527	3155.19	121346	4.133	0.242	0.802	1.35805
422	ARL13B_KAN416-45_2.tif:0001-0035	3.874	2128.85	455	3767	33.886	5.578	0.588	8247.67	317199	3.339	0.3	0.861	3.54994
423	ARL13B_KAN416-45_2.tif:0002-0061	3.536	1238.43	235	2799	197.722	9.93	0.522	4379.37	168427	3.884	0.257	0.877	1.88496
424	ARL13B_KAN416-45_2.tif:0003-0125	3.25	1498.79	453	3440	37.7	20.129	0.499	4871.37	187349	4.209	0.238	0.806	2.09672
425	ARL13B_KAN416-45_2.tif:0004-0136	2.912	1703.18	456	3697	115.682	21.944	0.276	4959.95	190756	8.045	0.124	0.653	2.13485
426	ARL13B_KAN416-45_2.tif:0005-0234	2.938	2072.22	450	3674	119.222	37.766	0.526	6088.55	234161	3.715	0.269	0.79	2.62062
427	ARL13B_KAN416-45_2.tif:0006-0282	3.276	1926.63	428	3667	189.833	45.617	0.494	6312.04	242756	4.209	0.238	0.813	2.71681
428	ARL13B_KAN416-45_2.tif:0007-0367	4.186	1962.6	191	3716	106.554	59.06	0.397	8215.95	315979	3.931	0.254	0.692	3.53629
429	ARL13B_KAN416-45_2.tif:0008-0364	3.146	1800.9	404	3783	66.901	58.729	0.442	5665.98	217909	4.749	0.211	0.793	2.43874
430	ARL13B_KAN416-45_2.tif:0009-0518	2.028	1139.4	463	2288	86.19	83.612	0.401	2310.84	88873	5.333	0.188	0.784	0.994625
431	ARL13B_KAN416-45_2.tif:0010-0573	3.198	1802.97	459	3648	23.877	92.373	0.506	5766.24	221765	4.144	0.241	0.817	2.48189
432	ARL13B_KAN416-45_2.tif:0011-0594	2.912	2110.05	436	3659	199.177	95.705	0.517	6144.82	236325	3.627	0.276	0.821	2.64484
433	ARL13B_KAN416-45_2.tif:0012-0692	1.794	1875.51	458	3789	24.45	111.661	0.544	3364.86	129410	3.456	0.289	0.784	1.4483
434	ARL13B_KAN416-45_2.tif:0013-0801	2.73	1742.28	469	3697	70.731	129.231	0.352	4756.7	182939	6.144	0.163	0.739	2.04737
435	ARL13B_KAN416-45_2.tif:0014-0801	2.964	2042.64	452	3737	23.291	129.204	0.463	6054.75	232861	4.489	0.223	0.755	2.60607
436	ARL13B_KAN416-45_2.tif:0015-0843	2.86	2248.54	127	3516	144.49	135.916	0.391	6431.2	247339	3.266	0.306	0.721	2.7681
437	ARL13B_KAN416-45_2.tif:0016-0958	3.328	2011.83	485	3627	201.168	154.552	0.568	6695.77	257514	3.746	0.267	0.862	2.88198
438	ARL13B_KAN416-45_3.tif:0001-0061	3.068	2318.59	456	3736	161.512	9.962	0.4	7113.85	273593	5.358	0.187	0.808	3.06193
439	ARL13B_KAN416-45_3.tif:0002-0091	5.044	1666.5	468	3131	26.972	14.873	0.581	8406.33	323301	3.138	0.319	0.866	3.61823
440	ARL13B_KAN416-45_3.tif:0003-0183	4.16	1485.27	396	2744	197.507	29.602	0.473	6179.09	237643	4.671	0.214	0.874	2.65959
441	ARL13B_KAN416-45_3.tif:0004-0228	3.978	1713.7	450	3528	222.316	36.912	0.469	6817.51	262196	3.872	0.258	0.801	2.93438
442	ARL13B_KAN416-45_3.tif:0005-0401	3.848	1174.72	451	2239	13.131	64.703	0.538	4520.61	173859	3.518	0.284	0.818	1.94575
443	ARL13B_KAN416-45_3.tif:0006-0440	3.536	1959.77	335	3603	68.385	71.185	0.563	6930.17	266529	2.434	0.411	0.758	2.98287
444	ARL13B_KAN416-45_3.tif:0007-0445	3.016	1003.2	153	2690	145.523	71.631	0.363	3025.83	116371	4.935	0.203	0.657	1.30237
445	ARL13B_KAN416-45_3.tif:0008-0536	4.082	1682.34	390	3315	94.032	86.448	0.527	6867.72	264127	3.804	0.263	0.885	2.95599
446	ARL13B_KAN416-45_3.tif:0009-0573	4.394	2214.03	451	3716	188.909	92.316	0.571	9729.03	374171	3.131	0.319	0.812	4.18755
447	ARL13B_KAN416-45_3.tif:0010-0576	3.458	1666.19	375	3478	126.931	92.951	0.57	5762.05	221604	3.69	0.271	0.92	2.48009
448	ARL13B_KAN416-45_3.tif:0011-0593	4.16	1866.21	464	3561	18.738	95.75	0.547	7763.91	298594	3.759	0.266	0.877	3.34173
449	ARL13B_KAN416-45_3.tif:0012-0726	2.99	1824.03	475	3688	197.432	117.131	0.47	5454.17	209763	4.426	0.226	0.813	2.34757
450	ARL13B_KAN416-45_3.tif:0013-0810	2.366	1016.75	350	3164	108.411	130.757	0.383	2405.77	92524	5.131	0.195	0.687	1.03549
451	ARL13B_KAN416-45_3.tif:0014-0823	2.964	1575.96	460	3297	27.292	132.782	0.514	4671.41	179659	3.822	0.262	0.784	2.01066
452	ARL13B_KAN416-45_3.tif:0015-0885	3.614	1642.21	173	3235	181.258	142.896	0.504	5935.3	228267	2.875	0.348	0.815	2.55466
453	ARL13B_KAN416-45_3.tif:0016-0896	2.938	1709.62	456	3722	54.67	144.474	0.433	5023.16	193187	4.856	0.206	0.779	2.16206
454	ARL13B_KAN416-45_3.tif:0017-0944	3.536	1180.32	455	2186	217.714	152.303	0.568	4173.85	160523	3.134	0.319	0.858	1.7965
455	ARL13B_KAN416-45_3.tif:0018-0951	3.796	2034.65	451	3702	86.309	153.386	0.531	7724	297059	3.459	0.289	0.813	3.32455
456	ARL13B_KAN416-45_3.tif:0019-1025	3.51	1557.23	405	3145	56.548	165.429	0.523	5466.2	210226	3.969	0.252	0.891	2.35275
457	ARL13B_KAN416-45_4.tif:0001-0023	3.51	993.556	475	2084	44.931	3.781	0.495	3487.59	134130	4.091	0.244	0.792	1.50112
458	ARL13B_KAN416-45_4.tif:0002-0029	2.964	739.833	455	1198	155.799	4.86	0.402	2193	84341	5.282	0.189	0.768	0.943905
459	ARL13B_KAN416-45_4.tif:0003-0051	3.328	2100.78	455	3693	27.68	8.461	0.457	6991.82	268900	4.311	0.232	0.766	3.0094
460	ARL13B_KAN416-45_4.tif:0004-0125	4.16	1302.54	173	2937	149.072	20.107	0.467	5418.88	208406	2.905	0.344	0.705	2.33238
461	ARL13B_KAN416-45_4.tif:0005-0158	3.016	2056.1	457	3746	52.645	25.611	0.507	6201.58	238508	4.046	0.247	0.797	2.66927
462	ARL13B_KAN416-45_4.tif:0006-0200	4.03	1101.85	332	2391	11.264	32.341	0.48	4440.7	170786	3.869	0.258	0.76	1.91136
463	ARL13B_KAN416-45_4.tif:0007-0221	4.186	1339.59	457	3286	129.817	35.668	0.552	5607.86	215674	3.697	0.27	0.859	2.41372
464	ARL13B_KAN416-45_4.tif:0008-0289	3.12	1847.25	32	3760	197.627	46.427	0.503	5763.77	221670	2.722	0.367	0.706	2.48083
465	ARL13B_KAN416-45_4.tif:0009-0351	2.262	935.563	484	2002	88.75	56.783	0.576	2116.37	81394	3.558	0.281	0.892	0.910924
466	ARL13B_KAN416-45_4.tif:0010-0427	3.9	1912.89	460	3701	12.602	69.006	0.544	7460.73	286934	3.615	0.277	0.822	3.21123
467	ARL13B_KAN416-45_4.tif:0011-0454	3.588	2112.15	453	3542	173.041	73.198	0.559	7578.86	291477	3.337	0.3	0.865	3.26208
468	ARL13B_KAN416-45_4.tif:0012-0481	3.38	2098.55	476	3615	204.073	77.689	0.533	7093.51	272811	3.638	0.275	0.855	3.05317
469	ARL13B_KAN416-45_4.tif:0013-0494	3.328	2168.5	278	3707	31.395	79.652	0.523	7217.2	277568	3.263	0.307	0.762	3.10641
470	ARL13B_KAN416-45_4.tif:0014-0637	1.456	1126.54	291	3442	192.443	102.78	0.587	1640.34	63086	3.153	0.317	0.806	0.706029
471	ARL13B_KAN416-45_4.tif:0015-0645	4.966	2296.22	452	3732	143.832	103.97	0.55	11403.7	438578	3.619	0.276	0.855	4.90836
472	ARL13B_KAN416-45_4.tif:0016-0665	3.51	1342.37	451	3279	5.293	107.21	0.454	4712	181220	4.424	0.226	0.774	2.02813
473	ARL13B_KAN416-45_4.tif:0017-0676	2.73	1930.76	454	3778	70.129	109.026	0.453	5271.3	202730	4.499	0.222	0.747	2.26886
474	ARL13B_KAN416-45_4.tif:0018-0744	4.862	2261.82	460	3687	176.64	119.966	0.468	10997.6	422960	4.753	0.21	0.824	4.73357
475	ARL13B_KAN416-45_4.tif:0019-0762	2.808	1927.72	452	3765	33.353	122.929	0.411	5413.37	208194	5.588	0.179	0.73	2.33001
476	ARL13B_KAN416-45_4.tif:0020-0815	5.174	1463.63	451	2631	215.905	131.397	0.561	7573.29	291263	3.282	0.305	0.849	3.25968
477	ARL13B_KAN416-45_4.tif:0021-0819	2.756	1165.22	450	2836	115.596	132.064	0.454	3211.53	123513	4.62	0.216	0.779	1.3823
478	ARL13B_KAN416-45_4.tif:0022-0847	3.926	2268.54	476	3622	179.112	136.792	0.464	8906.84	342550	3.95	0.253	0.774	3.83366
479	ARL13B_KAN416-45_4.tif:0023-0944	2.574	1573.68	439	3733	44.366	152.12	0.449	4050.89	155794	4.64	0.216	0.762	1.74357
480	ARL13B_KAN416-45_4.tif:0024-0961	4.29	1974.32	469	3668	218.527	154.844	0.307	8470.32	325762	8.007	0.125	0.74	3.64578
481	ARL13B_KAN416-45_4.tif:0025-0956	2.886	2060.35	461	3676	153.489	154.151	0.557	5946.53	228699	3.595	0.278	0.854	2.55949
482	ARL13B_KAN416-45_4.tif:0026-0972	4.576	2133.69	454	3759	15.032	156.709	0.485	9764.34	375529	4.509	0.222	0.848	4.20275
483	ARL13B_KAN416-45_4.tif:0027-1002	2.418	1613.23	477	3632	103.334	161.705	0.519	3901.01	150030	3.686	0.271	0.812	1.67907
484	ARL13B_KAN416-45_5.tif:0001-0018	3.224	962.427	453	2422	52.757	2.923	0.377	3103.05	119341	5.75	0.174	0.693	1.33561
485	ARL13B_KAN416-45_5.tif:0002-0035	2.652	2239.61	459	3729	131.335	5.758	0.566	5939.8	228440	3.809	0.263	0.843	2.55659
486	ARL13B_KAN416-45_5.tif:0003-0137	2.158	1163.57	463	2441	171.748	21.968	0.485	2511.13	96576	4.234	0.236	0.822	1.08083
487	ARL13B_KAN416-45_5.tif:0004-0190	2.782	2210.86	471	3753	22.277	30.809	0.448	6150.98	236562	3.382	0.296	0.671	2.64749
488	ARL13B_KAN416-45_5.tif:0005-0281	2.704	1973.38	229	3621	204.397	45.348	0.55	5336.33	205231	3.863	0.259	0.908	2.29685
489	ARL13B_KAN416-45_5.tif:0006-0328	2.002	1889.9	450	3727	223.515	52.69	0.45	3783.8	145522	4.14	0.242	0.856	1.62861
490	ARL13B_KAN416-45_5.tif:0007-0363	2.782	2088.42	479	3623	122.362	58.706	0.492	5810.34	223461	3.852	0.26	0.778	2.50087
491	ARL13B_KAN416-45_5.tif:0008-0440	3.302	1948.91	451	3596	204.439	71.064	0.458	6435.67	247511	3.866	0.259	0.779	2.77003
492	ARL13B_KAN416-45_5.tif:0009-0667	3.406	1988.62	463	3711	14.821	107.455	0.403	6773.64	260509	5.043	0.198	0.777	2.9155
493	ARL13B_KAN416-45_5.tif:0010-0727	2.834	1890.17	454	3805	88.079	117.311	0.477	5357.08	206029	4.252	0.235	0.787	2.30578
494	ARL13B_KAN416-45_5.tif:0011-0803	2.782	2068.11	451	3661	7.522	129.393	0.433	5753.83	221288	5.003	0.2	0.811	2.47655
495	ARL13B_KAN416-45_5.tif:0012-0802	1.17	719.444	456	1117	79.498	129.36	0.391	841.801	32375	5.103	0.196	0.692	0.362326
496	ARL13B_KAN416-45_5.tif:0013-0835	1.742	1541.91	454	3783	129.049	134.751	0.534	2686.17	103308	3.535	0.283	0.812	1.15618
497	ARL13B_KAN416-45_5.tif:0014-0901	3.718	1630.23	460	3537	214.74	145.36	0.56	6061.56	233123	3.562	0.281	0.854	2.609
498	ARL13B_KAN416-45_5.tif:0015-0906	2.86	668.627	305	1203	106.784	146.104	0.444	1912.39	73549	3.974	0.252	0.856	0.823126
499	ARL13B_KAN416-45_5.tif:0016-0935	1.924	1686.35	452	3681	164.658	150.719	0.583	3244.74	124790	3.342	0.299	0.822	1.39659
500	ARL13B_KAN416-45_5.tif:0017-1001	2.08	1875.99	456	3803	21.878	161.468	0.507	3902.29	150079	4.152	0.241	0.825	1.67961
501	ARL13B_KAN416-45_6.tif:0001-0025	1.794	805.565	456	1736	74.66	4.07	0.306	1445.27	55584	7.501	0.133	0.67	0.62207
502	ARL13B_KAN416-45_6.tif:0002-0057	4.342	2119.24	450	3622	128.224	9.436	0.559	9202.29	353913	3.453	0.29	0.811	3.96083
503	ARL13B_KAN416-45_6.tif:0003-0060	3.614	2080.21	450	3692	215.672	9.912	0.551	7518.33	289149	2.413	0.414	0.755	3.23602
504	ARL13B_KAN416-45_6.tif:0004-0130	3.952	1787.07	451	3649	97.781	20.994	0.591	7062.94	271635	3.288	0.304	0.884	3.04001
505	ARL13B_KAN416-45_6.tif:0005-0154	2.652	1238.72	452	2366	67.659	24.907	0.567	3285.3	126350	3.624	0.276	0.883	1.41405
506	ARL13B_KAN416-45_6.tif:0006-0161	4.55	1875.75	0	3551	216.045	26.041	0.463	8535.2	328257	1.64	0.61	0.677	3.6737
507	ARL13B_KAN416-45_6.tif:0007-0204	3.042	1035.2	457	1821	14.869	32.941	0.528	3149.26	121118	3.505	0.285	0.842	1.3555
508	ARL13B_KAN416-45_6.tif:0008-0238	3.146	2111.61	445	3637	143.193	38.36	0.461	6643.53	255505	4.549	0.22	0.823	2.85949
509	ARL13B_KAN416-45_6.tif:0009-0264	2.704	1208.71	457	2750	70.823	42.565	0.563	3268.55	125706	3.524	0.284	0.822	1.40684
510	ARL13B_KAN416-45_6.tif:0010-0278	7.15	1502.19	0	3671	153.555	44.803	0.263	10741.3	413102	6.703	0.149	0.613	4.62325
511	ARL13B_KAN416-45_6.tif:0011-0359	3.952	1409.95	451	2929	5.525	58	0.573	5572.45	214312	3.614	0.277	0.856	2.39848
512	ARL13B_KAN416-45_6.tif:0012-0411	1.846	1459.39	453	3615	114.262	66.302	0.488	2694.2	103617	4.36	0.229	0.728	1.15963
513	ARL13B_KAN416-45_6.tif:0013-0417	3.406	1056.77	456	1853	90.134	67.322	0.383	3599.58	138437	5.2	0.192	0.744	1.54932
514	ARL13B_KAN416-45_6.tif:0014-0446	3.484	1842.37	453	3711	133.626	72.159	0.561	6419.22	246878	3.245	0.308	0.825	2.76294
515	ARL13B_KAN416-45_6.tif:0015-0457	2.132	1364.27	456	3744	201.287	73.819	0.355	2908.8	111870	4.885	0.205	0.643	1.252
516	ARL13B_KAN416-45_6.tif:0016-0467	4.082	2064.07	453	3554	163.376	75.369	0.59	8426.04	324059	3.164	0.316	0.851	3.62672
517	ARL13B_KAN416-45_6.tif:0017-0505	3.458	2059.26	433	3628	51.809	81.522	0.553	7121.34	273881	3.689	0.271	0.902	3.06515
518	ARL13B_KAN416-45_6.tif:0018-0609	4.186	1946.92	461	3756	89.962	98.177	0.57	8150.3	313454	3.426	0.292	0.845	3.50803
519	ARL13B_KAN416-45_6.tif:0019-0685	2.158	1821.42	441	3715	45.475	110.545	0.512	3930.86	151178	3.66	0.273	0.765	1.69191
520	ARL13B_KAN416-45_6.tif:0020-0739	2.548	1982.59	464	3685	194.774	119.343	0.478	5051.95	194294	4.271	0.234	0.731	2.17445
521	ARL13B_KAN416-45_6.tif:0021-0774	2.132	1699.59	457	3745	74.714	124.949	0.504	3623.73	139366	3.803	0.263	0.828	1.55972
522	ARL13B_KAN416-45_6.tif:0022-0814	2.522	1858.28	450	3690	160.395	131.218	0.538	4686.86	180253	3.51	0.285	0.779	2.01731
523	ARL13B_KAN416-45_6.tif:0023-0819	2.6	1709.62	450	3793	200.327	132.183	0.398	4445.28	170962	5.474	0.183	0.714	1.91333
524	ARL13B_KAN416-45_6.tif:0024-0871	1.456	1912.73	533	3697	223.089	140.498	0.599	2785.11	107113	3.418	0.293	0.8	1.19876
525	ARL13B_KAN416-45_6.tif:0025-0952	1.768	1154.73	451	3112	69.119	153.505	0.443	2041.69	78522	4.862	0.206	0.743	0.878782
526	ARL13B_KAN416-45_6.tif:0026-0959	3.302	2091.24	456	3701	194.207	154.837	0.501	6905.7	265588	3.97	0.252	0.782	2.97234
527	ARL13B_KAN416-45_6.tif:0027-0983	3.198	2099.01	462	3782	172.963	158.517	0.472	6713.03	258178	4.177	0.239	0.815	2.88941
528	ARL13B_KAN416-45_6.tif:0028-0999	1.794	1147.68	452	2217	121.179	161.141	0.567	2059.06	79190	3.79	0.264	0.821	0.886258
										210061				2.3509
529	ARL13B_KAN416-46_1.tif:0001-0043	2.496	1171.77	452	2148	21.574	6.966	0.572	2924.92	112490	2.987	0.335	0.803	1.25894
530	ARL13B_KAN416-46_1.tif:0002-0063	2.392	1487.74	452	3292	7.12	10.033	0.599	3558.89	136872	2.97	0.337	0.763	1.53181
531	ARL13B_KAN416-46_1.tif:0003-0348	3.042	2264.32	447	3722	111.876	56.267	0.381	6888.49	264926	5.355	0.187	0.705	2.96493
532	ARL13B_KAN416-46_1.tif:0004-0431	2.808	1611.43	459	3371	163.519	69.664	0.492	4525.18	174035	3.92	0.255	0.831	1.94772
533	ARL13B_KAN416-46_1.tif:0005-0476	0.962	761.703	315	1855	13.443	76.696	0.545	732.802	28183	2.979	0.336	0.692	0.315411
534	ARL13B_KAN416-46_1.tif:0006-0575	1.664	1171.22	456	3853	105.248	92.83	0.293	1949.03	74958	7.404	0.135	0.601	0.838895
535	ARL13B_KAN416-46_1.tif:0007-0589	2.054	1335.47	298	3785	209.134	95.083	0.375	2743.22	105502	5.784	0.173	0.705	1.18073
536	ARL13B_KAN416-46_1.tif:0008-0600	2.132	1210.24	216	3770	87.283	96.892	0.51	2580.39	99240	4.097	0.244	0.804	1.11065
537	ARL13B_KAN416-46_1.tif:0009-0798	3.822	906.211	346	2437	107.148	128.973	0.307	3463.75	133213	2.582	0.387	0.519	1.49086
538	ARL13B_KAN416-46_1.tif:0010-0844	3.25	1094.57	452	2640	37.155	136.094	0.406	3557.56	136821	5.275	0.19	0.767	1.53124
539	ARL13B_KAN416-46_1.tif:0011-0864	2.522	1788.14	452	3777	80.12	139.416	0.427	4509.97	173450	4.692	0.213	0.785	1.94117
540	ARL13B_KAN416-46_1.tif:0012-0950	2.106	1493.1	459	3799	95.847	153.139	0.487	3144.66	120941	3.561	0.281	0.698	1.35352
541	ARL13B_KAN416-46_1.tif:0013-0982	3.51	1842.44	392	3702	57.828	158.319	0.523	6467.37	248730	4.198	0.238	0.944	2.78367
542	ARL13B_KAN416-46_1.tif:0014-1026	2.158	1117.53	464	2241	13.511	165.642	0.389	2411.78	92755	5.022	0.199	0.669	1.03807
543	ARL13B_KAN416-46_1.tif:0015-1026	1.586	709.967	414	1278	41.829	165.431	0.309	1126.08	43308	6.45	0.155	0.649	0.484683
544	ARL13B_KAN416-46_2.tif:0001-0063	2.834	881.138	449	1796	67.615	10.192	0.49	2497.29	96044	3.779	0.265	0.829	1.07488
545	ARL13B_KAN416-46_2.tif:0002-0139	3.796	1831.67	469	3188	203.383	22.502	0.577	6953.44	267424	3.736	0.268	0.921	2.99289
546	ARL13B_KAN416-46_2.tif:0003-0342	1.638	700.349	452	927	71.366	55.092	0.537	1147.24	44122	3.651	0.274	0.824	0.493793
547	ARL13B_KAN416-46_2.tif:0004-0416	1.118	1106.16	472	2660	65.308	67.112	0.436	1236.76	47565	4.568	0.219	0.667	0.532325
548	ARL13B_KAN416-46_2.tif:0005-0648	1.872	910.389	301	1898	190.68	104.447	0.539	1704.35	65548	3.926	0.255	0.828	0.733583
549	ARL13B_KAN416-46_2.tif:0006-0712	3.224	1219.23	452	2904	122.516	115.039	0.488	3931.05	151185	3.518	0.284	0.754	1.69199
550	ARL13B_KAN416-46_2.tif:0007-0992	1.196	890.739	369	1987	173.035	159.999	0.381	1065.39	40974	5.173	0.193	0.672	0.458562
551	ARL13B_KAN416-46_3.tif:0001-0089	3.25	1743.28	458	3719	60.419	14.394	0.547	5666	217910	3.068	0.326	0.776	2.43875
552	ARL13B_KAN416-46_3.tif:0002-0083	1.742	1216.88	468	3652	183.078	13.515	0.538	2119.93	81531	3.233	0.309	0.807	0.912457
553	ARL13B_KAN416-46_3.tif:0003-0101	2.704	1199.28	319	3239	141.95	16.254	0.425	3243.05	124725	4.559	0.219	0.785	1.39586
554	ARL13B_KAN416-46_3.tif:0004-0174	2.054	1031.2	224	2430	79.969	28.007	0.424	2118.22	81465	5.03	0.199	0.738	0.911718
555	ARL13B_KAN416-46_3.tif:0005-0344	2.678	1930.19	274	3736	193.454	55.472	0.376	5169.37	198810	5.396	0.185	0.698	2.22499
556	ARL13B_KAN416-46_3.tif:0006-0351	2.184	710.667	188	1697	6.918	56.52	0.221	1552.19	59696	5.781	0.173	0.476	0.66809
557	ARL13B_KAN416-46_3.tif:0007-0463	1.066	665.488	240	1094	217.088	74.621	0.6	709.453	27285	3.417	0.293	0.882	0.305361
558	ARL13B_KAN416-46_3.tif:0008-0636	2.782	2267.9	470	3702	124.603	102.574	0.569	6309.67	242665	3.451	0.29	0.82	2.71579
559	ARL13B_KAN416-46_3.tif:0009-0754	2.444	1278.3	471	3605	167.834	121.565	0.368	3124.35	120160	5.937	0.168	0.674	1.34477
560	ARL13B_KAN416-46_3.tif:0010-0786	3.64	802.114	446	1668	98.677	126.847	0.467	2919.87	112296	4.248	0.235	0.769	1.25676
561	ARL13B_KAN416-46_3.tif:0011-0972	2.678	1863.23	458	3805	139.335	156.886	0.347	4990.04	191913	5.809	0.172	0.723	2.1478
562	ARL13B_KAN416-46_3.tif:0012-0987	1.638	1544.57	451	3802	35.09	159.17	0.48	2530.16	97308	4.366	0.229	0.737	1.08903
563	ARL13B_KAN416-46_3.tif:0013-1011	1.742	885.91	294	2531	180.014	163.011	0.401	1543.35	59356	4.794	0.209	0.691	0.664285
564	ARL13B_KAN416-46_4.tif:0001-0138	2.73	1238.73	236	3628	133.599	22.286	0.425	3381.95	130067	4.264	0.235	0.75	1.45565
565	ARL13B_KAN416-46_4.tif:0002-0216	2.86	1622.85	450	3646	141.405	34.862	0.59	4641.62	178513	3.331	0.3	0.873	1.99783
566	ARL13B_KAN416-46_4.tif:0003-0239	0.91	641.029	453	1132	75.859	38.454	0.476	583.371	22436	3.734	0.268	0.693	0.251093
[truncated: 304 more rows]

## Sheet: Replicate2_KAN423
	Label	Area	Mean	Min	Max	X	Y	Circ	IntDen	RawIntDen	AR	Round	Solidity
119	ARL13B_KAN423-20_1.tif:0001-0051	1.196	341.696	174	605	47.039	8.381	0.445	408.693	15718	3.672	0.272	0.634	0.205123
120	ARL13B_KAN423-20_1.tif:0002-0076	1.716	934.712	227	1997	154.372	12.301	0.526	1604.06	61691	3.828	0.261	0.759	0.805079
121	ARL13B_KAN423-20_1.tif:0003-0137	2.886	1192.43	220	2869	67.721	22.059	0.422	3441.57	132360	5.692	0.176	0.822	1.72732
122	ARL13B_KAN423-20_1.tif:0004-0167	2.522	864.052	224	2304	4.918	26.966	0.388	2179.27	83813	5.526	0.181	0.721	1.09378
123	ARL13B_KAN423-20_1.tif:0005-0300	1.664	566.688	220	1357	163.77	48.612	0.401	943.025	36268	4.953	0.202	0.703	0.473304
124	ARL13B_KAN423-20_1.tif:0006-0445	3.406	865.176	221	2376	112.286	71.877	0.305	2946.97	113338	7.636	0.131	0.755	1.47908
125	ARL13B_KAN423-20_1.tif:0007-0453	1.742	731.03	222	1658	140.351	73.161	0.471	1273.53	48979	4.092	0.244	0.766	0.639185
126	ARL13B_KAN423-20_1.tif:0008-0506	3.146	671.851	225	1906	47.481	81.732	0.287	2113.77	81294	7.955	0.126	0.686	1.0609
127	ARL13B_KAN423-20_1.tif:0009-0629	3.796	734.61	230	1785	177.726	101.256	0.33	2788.75	107253	6.074	0.165	0.685	1.39967
128	ARL13B_KAN423-20_1.tif:0010-0639	1.742	624.627	225	1298	54.624	103.107	0.488	1088.17	41850	4.31	0.232	0.827	0.546151
129	ARL13B_KAN423-20_1.tif:0011-0689	4.316	492.373	144	1040	157.732	110.851	0.51	2125.21	81734	2.631	0.38	0.708	1.06664
130	ARL13B_KAN423-20_1.tif:0012-0712	0.728	374.714	246	550	92.241	114.954	0.444	272.808	10492	4.791	0.209	0.709	0.136923
131	ARL13B_KAN423-20_1.tif:0013-0763	2.444	735.543	224	1802	36.285	123.078	0.454	1797.77	69141	4.974	0.201	0.761	0.902303
132	ARL13B_KAN423-20_1.tif:0014-0793	3.848	452.574	221	1140	179.979	128.116	0.328	1741.61	66981	6.246	0.16	0.763	0.874115
133	ARL13B_KAN423-20_1.tif:0015-0916	3.692	894.183	23	2378	27.167	147.805	0.552	3301.52	126974	3.011	0.332	0.798	1.65704
134	ARL13B_KAN423-20_1.tif:0016-0924	2.938	909.903	222	1933	66.322	148.994	0.583	2673.45	102819	3.082	0.324	0.796	1.34181
135	ARL13B_KAN423-20_2.tif:0001-0040	3.458	608.248	224	1963	183.155	6.511	0.346	2103.45	80897	6.724	0.149	0.794	1.05572
136	ARL13B_KAN423-20_2.tif:0002-0124	2.47	448.021	153	803	43.075	20.132	0.441	1106.68	42562	3.897	0.257	0.728	0.555442
137	ARL13B_KAN423-20_2.tif:0003-0210	2.6	523.2	202	1337	37.966	33.953	0.343	1360.4	52320	6.206	0.161	0.725	0.682786
138	ARL13B_KAN423-20_2.tif:0004-0265	2.756	645.849	142	1904	133.754	42.646	0.47	1780.07	68460	4.077	0.245	0.765	0.893416
139	ARL13B_KAN423-20_2.tif:0005-0266	2.574	648.505	220	1703	68.047	42.906	0.467	1669.35	64202	4.66	0.215	0.783	0.837849
140	ARL13B_KAN423-20_2.tif:0006-0290	1.794	612.29	232	1291	191.861	46.796	0.496	1098.51	42248	4.18	0.239	0.817	0.551345
141	ARL13B_KAN423-20_2.tif:0007-0301	2.106	743.543	222	1995	12.332	48.641	0.379	1566	60227	5.9	0.17	0.669	0.785974
142	ARL13B_KAN423-20_2.tif:0008-0343	1.664	310.094	0	957	144.873	55.392	0.532	516.027	19846	2.358	0.424	0.696	0.258994
143	ARL13B_KAN423-20_2.tif:0009-0392	3.094	580.824	133	1501	52.231	63.28	0.333	1797.18	69118	4.484	0.223	0.569	0.902003
144	ARL13B_KAN423-20_2.tif:0010-0455	3.614	893.662	221	2884	183.351	73.324	0.396	3229.89	124219	4.737	0.211	0.745	1.62108
145	ARL13B_KAN423-20_2.tif:0011-0513	2.626	490.188	82	1652	62.63	82.778	0.531	1287.31	49509	2.826	0.354	0.759	0.646102
146	ARL13B_KAN423-20_2.tif:0012-0586	1.716	599.606	220	1435	35.052	94.536	0.365	1028.99	39574	6.014	0.166	0.684	0.516448
147	ARL13B_KAN423-20_2.tif:0013-0662	3.744	1053.63	105	3060	119.946	106.713	0.355	3945.04	151723	5.955	0.168	0.733	1.98001
148	ARL13B_KAN423-20_2.tif:0014-0736	2.73	763.857	154	2471	195.539	118.641	0.387	2085.46	80205	5.089	0.196	0.665	1.04669
149	ARL13B_KAN423-20_2.tif:0015-0852	2.366	1093.87	222	3233	158.304	137.379	0.454	2588.25	99542	4.703	0.213	0.771	1.29904
150	ARL13B_KAN423-20_2.tif:0016-0859	2.21	731.294	234	2123	59.174	138.509	0.372	1616.26	62160	5.416	0.185	0.7	0.8112
151	ARL13B_KAN423-20_2.tif:0017-0967	2.418	659.839	221	1558	35.899	155.824	0.272	1595.59	61365	8.061	0.124	0.694	0.800825
152	ARL13B_KAN423-20_2.tif:0018-1017	2.938	540.442	225	1361	145.373	163.918	0.448	1587.92	61070	4.364	0.229	0.771	0.796975
153	ARL13B_KAN423-20_3.tif:0001-0063	4.472	897.186	223	2190	147.979	9.968	0.302	4012.46	154316	4.411	0.227	0.587	2.01385
154	ARL13B_KAN423-20_3.tif:0002-0131	8.321	710.878	0	2454	156.607	21.033	0.324	5914.86	227481	1.987	0.503	0.538	2.96867
155	ARL13B_KAN423-20_3.tif:0003-0206	2.756	489.849	213	1210	34.6	33.093	0.454	1350.11	51924	3.695	0.271	0.709	0.677618
156	ARL13B_KAN423-20_3.tif:0004-0397	4.03	457.884	220	1196	9.213	64.18	0.368	1845.38	70972	5.599	0.179	0.714	0.926198
157	ARL13B_KAN423-20_3.tif:0005-0466	2.34	333.256	220	531	134.239	75.103	0.55	779.865	29993	3.461	0.289	0.741	0.391414
158	ARL13B_KAN423-20_3.tif:0006-0488	3.562	729.197	62	2528	78.777	78.752	0.374	2597.56	99900	4.321	0.231	0.637	1.30371
159	ARL13B_KAN423-20_3.tif:0007-0521	4.368	887.423	223	1895	16.338	84.121	0.538	3876.49	149087	3.714	0.269	0.873	1.94561
160	ARL13B_KAN423-20_3.tif:0008-0551	4.576	831.131	220	1853	167.831	89.007	0.512	3803.48	146279	3.867	0.259	0.863	1.90897
161	ARL13B_KAN423-20_3.tif:0009-0579	2.678	776.311	114	2716	204.928	93.261	0.417	2079.09	79960	4.408	0.227	0.665	1.04349
162	ARL13B_KAN423-20_3.tif:0010-0617	3.12	454.917	224	782	78.597	99.403	0.427	1419.42	54590	4.996	0.2	0.833	0.71241
163	ARL13B_KAN423-20_3.tif:0011-0640	3.302	778.417	176	2049	16.551	103.364	0.449	2570.49	98859	3.677	0.272	0.702	1.29013
164	ARL13B_KAN423-20_3.tif:0012-0739	2.834	868.183	231	2152	11.219	119.201	0.574	2460.58	94632	3.335	0.3	0.813	1.23497
165	ARL13B_KAN423-20_3.tif:0013-0782	3.328	848.023	224	1984	221.978	126.109	0.487	2822.39	108547	4.139	0.242	0.865	1.41656
166	ARL13B_KAN423-20_3.tif:0014-0845	1.56	458.683	220	920	6.222	136.28	0.434	715.589	27521	4.592	0.218	0.714	0.359154
167	ARL13B_KAN423-20_3.tif:0015-0876	2.574	651.737	221	2136	161.648	141.341	0.369	1677.67	64522	6.025	0.166	0.692	0.842025
168	ARL13B_KAN423-20_3.tif:0016-0881	3.198	1002.8	223	2229	26.625	142.037	0.531	3207.14	123344	3.465	0.289	0.764	1.60966
169	ARL13B_KAN423-20_3.tif:0017-0944	1.898	456.89	226	1140	7.286	152.265	0.361	867.23	33353	5.761	0.174	0.673	0.435263
170	ARL13B_KAN423-20_3.tif:0018-0996	1.742	570.164	184	1474	138.262	160.64	0.469	993.286	38201	4.715	0.212	0.788	0.49853
171	ARL13B_KAN423-20_3.tif:0019-1010	2.34	785.178	162	2094	90.676	163.088	0.355	1837.43	70666	5.804	0.172	0.674	0.922205
172	ARL13B_KAN423-20_4.tif:0001-0011	4.784	790.728	70	2243	191.994	1.711	0.451	3783.07	145494	4.503	0.222	0.812	1.89872
173	ARL13B_KAN423-20_4.tif:0002-0098	3.952	581.605	168	1810	145.156	15.875	0.356	2298.64	88404	5.954	0.168	0.762	1.15369
174	ARL13B_KAN423-20_4.tif:0003-0101	1.482	358.93	174	731	76.513	16.415	0.417	531.966	20459	4.891	0.204	0.726	0.266994
175	ARL13B_KAN423-20_4.tif:0004-0131	1.742	535.537	184	1474	186.368	21.183	0.554	932.962	35881	3.05	0.328	0.74	0.468254
176	ARL13B_KAN423-20_4.tif:0005-0189	2.392	792.554	234	1780	23.935	30.548	0.34	1895.9	72915	7.137	0.14	0.708	0.951555
177	ARL13B_KAN423-20_4.tif:0006-0217	3.718	625.056	205	1548	99.438	34.872	0.397	2324.1	89383	4.072	0.246	0.679	1.16647
178	ARL13B_KAN423-20_4.tif:0007-0226	2.808	602.185	219	2087	112.293	36.465	0.411	1691.04	65036	4.9	0.204	0.74	0.848732
179	ARL13B_KAN423-20_4.tif:0008-0334	2.054	592.544	68	1423	54.859	53.946	0.402	1217.16	46811	3.637	0.275	0.664	0.610893
180	ARL13B_KAN423-20_4.tif:0009-0345	2.73	809.133	147	2067	42.348	55.597	0.401	2209.07	84959	4.989	0.2	0.732	1.10873
181	ARL13B_KAN423-20_4.tif:0010-0362	5.408	619.923	207	1305	117.161	58.237	0.25	3352.75	128944	9.024	0.111	0.709	1.68274
182	ARL13B_KAN423-20_4.tif:0011-0377	4.264	712.817	220	2134	21.112	60.773	0.317	3039.64	116902	6.054	0.165	0.655	1.52559
183	ARL13B_KAN423-20_4.tif:0012-0411	2.132	593.329	194	2051	216.995	66.435	0.279	1265.05	48653	7.139	0.14	0.631	0.634931
184	ARL13B_KAN423-20_4.tif:0013-0478	3.432	803.083	37	3354	83.898	77.104	0.271	2756.35	106007	5.94	0.168	0.588	1.38341
185	ARL13B_KAN423-20_4.tif:0014-0510	3.744	912.014	227	3024	126.388	82.156	0.421	3414.79	131330	4.717	0.212	0.746	1.71388
186	ARL13B_KAN423-20_4.tif:0015-0643	0.65	240.96	222	280	42.18	103.706	0.472	156.633	6024	3.933	0.254	0.694	0.0786144
187	ARL13B_KAN423-20_4.tif:0016-0663	2.184	610.69	206	1317	205.49	106.857	0.374	1333.83	51298	5.141	0.195	0.686	0.669449
188	ARL13B_KAN423-20_4.tif:0017-0684	3.042	792.291	220	1761	20.922	110.38	0.308	2410.29	92698	6.594	0.152	0.69	1.20973
189	ARL13B_KAN423-20_4.tif:0018-0685	1.69	724.354	218	1766	113.906	110.46	0.569	1224.23	47083	4.201	0.238	0.977	0.614442
190	ARL13B_KAN423-20_4.tif:0019-0691	3.666	624.241	97	2293	136.824	111.472	0.247	2288.61	88018	8.148	0.123	0.71	1.14865
191	ARL13B_KAN423-20_4.tif:0020-0712	3.874	936.96	145	3132	50.696	115.003	0.378	3630	139607	6.002	0.167	0.814	1.8219
192	ARL13B_KAN423-20_4.tif:0021-0821	1.768	797.103	241	1763	76.935	132.348	0.438	1409.36	54203	5.539	0.181	0.76	0.70736
193	ARL13B_KAN423-20_4.tif:0022-0858	1.95	1081.75	225	2561	180.885	138.388	0.497	2109.53	81131	4.175	0.24	0.806	1.05878
194	ARL13B_KAN423-20_4.tif:0023-0889	1.638	755.683	221	1837	137.118	143.45	0.496	1237.88	47608	4.41	0.227	0.768	0.621294
195	ARL13B_KAN423-20_4.tif:0024-0903	3.354	1103.43	220	2392	18.222	145.597	0.4	3701.11	142342	5.187	0.193	0.819	1.85759
196	ARL13B_KAN423-20_4.tif:0025-0959	1.508	413.655	170	972	89.825	154.861	0.313	623.83	23992	5.521	0.181	0.644	0.3131
197	ARL13B_KAN423-20_5.tif:0001-0071	2.21	853.541	85	2280	110.875	11.239	0.481	1886.44	72551	3.217	0.311	0.766	0.946805
198	ARL13B_KAN423-20_5.tif:0002-0095	3.224	481.597	222	1240	160.813	15.583	0.168	1552.76	59718	11.051	0.09	0.593	0.779331
199	ARL13B_KAN423-20_5.tif:0003-0284	4.42	1175.27	213	3713	167.252	46.012	0.406	5195.01	199796	4.484	0.223	0.767	2.60738
200	ARL13B_KAN423-20_5.tif:0004-0288	1.794	608.145	234	1491	108.06	46.432	0.417	1091.08	41962	5.069	0.197	0.701	0.547612
201	ARL13B_KAN423-20_5.tif:0005-0315	1.69	949.846	224	2072	206.59	50.884	0.572	1605.34	61740	3.432	0.291	0.833	0.805719
202	ARL13B_KAN423-20_5.tif:0006-0368	1.716	520.03	217	1122	162.63	59.438	0.237	892.426	34322	8.551	0.117	0.576	0.447909
203	ARL13B_KAN423-20_5.tif:0007-0550	2.366	1059.9	226	3215	135.493	88.736	0.513	2507.88	96451	3.665	0.273	0.802	1.2587
204	ARL13B_KAN423-20_5.tif:0008-0558	2.262	884.69	228	2344	217.119	90.043	0.49	2001.29	76968	4.187	0.239	0.798	1.00445
205	ARL13B_KAN423-20_5.tif:0009-0613	1.924	394.081	69	790	52.783	99.066	0.417	758.258	29162	2.033	0.492	0.594	0.38057
206	ARL13B_KAN423-20_5.tif:0010-0778	3.042	721.812	127	1573	185.321	125.456	0.388	2195.88	84452	5.839	0.171	0.863	1.10211
207	ARL13B_KAN423-20_5.tif:0011-0778	0.988	332.289	220	503	81.83	125.431	0.517	328.322	12627	2.357	0.424	0.731	0.164785
208	ARL13B_KAN423-20_5.tif:0012-0815	3.068	653.186	214	1535	14.705	131.513	0.342	2004.1	77076	6.494	0.154	0.817	1.00586
209	ARL13B_KAN423-20_5.tif:0013-0828	2.08	582.888	223	1131	146.592	133.527	0.304	1212.48	46631	8.107	0.123	0.705	0.608544
210	ARL13B_KAN423-20_5.tif:0014-0937	2.158	587.482	220	1158	141.522	151.209	0.422	1267.86	48761	5.055	0.198	0.772	0.63634
211	ARL13B_KAN423-20_6.tif:0001-0036	2.678	1028.6	230	2654	90.168	5.834	0.514	2754.76	105946	3.857	0.259	0.795	1.38262
212	ARL13B_KAN423-20_6.tif:0002-0049	2.756	481.84	127	983	192.114	7.891	0.545	1328.03	51075	3.294	0.304	0.788	0.666539
213	ARL13B_KAN423-20_6.tif:0003-0078	2.47	423.211	125	1028	210.607	12.482	0.405	1045.39	40205	3.215	0.311	0.644	0.524683
214	ARL13B_KAN423-20_6.tif:0004-0100	4.524	483.81	221	858	76.401	16.167	0.326	2188.89	84183	6.55	0.153	0.77	1.0986
215	ARL13B_KAN423-20_6.tif:0005-0142	2.47	360.4	221	893	34.098	23.009	0.394	890.242	34238	5.228	0.191	0.722	0.446813
216	ARL13B_KAN423-20_6.tif:0006-0142	3.354	1404.91	70	3761	164.928	22.802	0.538	4712.34	181233	2.286	0.438	0.746	2.36513
217	ARL13B_KAN423-20_6.tif:0007-0160	4.264	655.768	216	1675	217.02	25.94	0.425	2796.36	107546	4.772	0.21	0.808	1.4035
218	ARL13B_KAN423-20_6.tif:0008-0214	2.574	730.848	145	2438	57.645	34.987	0.334	1881.32	72354	4.585	0.218	0.643	0.944234
219	ARL13B_KAN423-20_6.tif:0009-0285	2.782	586.785	224	1486	26.88	45.933	0.492	1632.53	62786	3.967	0.252	0.79	0.819369
220	ARL13B_KAN423-20_6.tif:0010-0311	4.134	965.912	222	2214	187.975	50.134	0.476	3993.32	153580	4.25	0.235	0.826	2.00425
221	ARL13B_KAN423-20_6.tif:0011-0381	1.586	544.672	184	1372	31.593	61.649	0.429	863.902	33225	2.959	0.338	0.61	0.433593
222	ARL13B_KAN423-20_6.tif:0012-0433	2.756	959.226	72	3758	107.087	69.528	0.371	2643.79	101678	3.286	0.304	0.618	1.32692
223	ARL13B_KAN423-20_6.tif:0013-0520	2.314	474.124	175	1289	150.868	83.804	0.279	1097.19	42197	6.823	0.147	0.543	0.550679
224	ARL13B_KAN423-20_6.tif:0014-0606	4.108	817.962	223	2074	17.525	97.822	0.366	3360.39	129238	5.869	0.17	0.775	1.68658
225	ARL13B_KAN423-20_6.tif:0015-0763	2.002	308.221	173	641	143.044	123.07	0.385	617.095	23733	5.796	0.173	0.88	0.30972
226	ARL13B_KAN423-20_6.tif:0016-0767	3.9	868.793	222	1927	40.472	123.591	0.339	3388.5	130319	5.766	0.173	0.701	1.70069
227	ARL13B_KAN423-20_6.tif:0017-0790	3.25	862.952	224	2140	158.255	127.245	0.542	2804.76	107869	3.095	0.323	0.708	1.40771
228	ARL13B_KAN423-20_6.tif:0018-0820	2.444	916.936	124	2313	31.161	132.312	0.555	2241.13	86192	3.71	0.27	0.9	1.12482
229	ARL13B_KAN423-20_6.tif:0019-0862	2.08	380.887	197	744	192.137	139.227	0.479	792.294	30471	3.235	0.309	0.788	0.397652
230	ARL13B_KAN423-20_6.tif:0020-0887	2.08	802.125	94	2003	133.545	143.089	0.582	1668.52	64170	3.213	0.311	0.833	0.837431
231	ARL13B_KAN423-20_6.tif:0021-0962	2.6	536.06	211	1063	169.782	155.276	0.3	1393.84	53606	6.312	0.158	0.619	0.699569
232	ARL13B_KAN423-20_6.tif:0022-0971	1.768	253.162	158	371	61.455	156.571	0.399	447.617	17215	3.66	0.273	0.581	0.224659
233	ARL13B_KAN423-20_6.tif:0023-1016	1.95	900.973	254	1856	41.253	163.932	0.497	1757	67573	4.415	0.227	0.82	0.881841
										76627.2				1
234	ARL13B_KAN423-21_1.tif:0001-0085	1.716	626.197	220	2034	53.838	13.868	0.58	1074.62	41329	2.916	0.343	0.767	0.539351
235	ARL13B_KAN423-21_1.tif:0002-0100	4.16	462.269	114	3363	62.801	15.878	0.332	1923.15	73963	3.87	0.258	0.562	0.965231
236	ARL13B_KAN423-21_1.tif:0003-0357	1.196	287.326	220	394	67.56	57.675	0.551	343.663	13217	2.672	0.374	0.754	0.172484
237	ARL13B_KAN423-21_1.tif:0004-0527	1.768	487.765	128	1244	86.285	84.95	0.546	862.42	33168	3.492	0.286	0.786	0.432849
238	ARL13B_KAN423-21_1.tif:0005-0602	1.794	447.855	220	1000	173.964	97.16	0.426	803.5	30902	4.151	0.241	0.683	0.403277
239	ARL13B_KAN423-21_1.tif:0006-0758	2.418	596.097	111	1529	51.597	122.374	0.36	1441.45	55437	4.892	0.204	0.626	0.723464
240	ARL13B_KAN423-21_1.tif:0007-0836	2.574	662.232	226	1683	25.296	134.786	0.42	1704.69	65561	4.98	0.201	0.71	0.855584
241	ARL13B_KAN423-21_1.tif:0008-0871	1.352	343.712	204	633	152.853	140.421	0.503	464.726	17873	3.323	0.301	0.712	0.233246
242	ARL13B_KAN423-21_2.tif:0001-0158	2.6	491.83	84	1000	59.245	25.498	0.296	1278.84	49183	5.865	0.171	0.608	0.641848
243	ARL13B_KAN423-21_2.tif:0002-0295	3.276	437.056	220	719	22.857	47.479	0.455	1431.88	55069	4.174	0.24	0.73	0.718661
244	ARL13B_KAN423-21_2.tif:0003-0296	1.716	314.621	158	498	195.328	47.994	0.385	539.923	20765	2.772	0.361	0.587	0.270987
245	ARL13B_KAN423-21_2.tif:0004-0367	1.898	667.521	212	2038	120.181	59.35	0.589	1267.03	48729	2.53	0.395	0.741	0.635923
246	ARL13B_KAN423-21_2.tif:0005-0439	2.106	724.383	152	2235	13.018	70.895	0.41	1525.64	58675	5.223	0.191	0.779	0.76572
247	ARL13B_KAN423-21_2.tif:0006-0471	2.47	629.453	181	1811	128.784	75.804	0.34	1554.84	59798	6.198	0.161	0.66	0.780375
248	ARL13B_KAN423-21_2.tif:0007-0493	2.782	550.047	112	1819	142.374	79.557	0.248	1530.32	58855	6.126	0.163	0.577	0.768069
249	ARL13B_KAN423-21_2.tif:0008-0593	3.458	543.699	122	1508	62.481	95.65	0.376	1880.22	72312	5.889	0.17	0.776	0.943686
250	ARL13B_KAN423-21_2.tif:0009-0690	1.898	325.685	192	547	56.048	111.29	0.449	618.187	23775	3.839	0.26	0.741	0.310268
251	ARL13B_KAN423-21_2.tif:0010-0812	2.028	472.538	189	1460	88.003	130.949	0.517	958.366	36858	4.152	0.241	0.83	0.481004
252	ARL13B_KAN423-21_3.tif:0001-0060	1.95	624.453	226	1454	167.054	9.741	0.548	1217.76	46834	3.281	0.305	0.765	0.611193
253	ARL13B_KAN423-21_3.tif:0002-0066	2.444	631.702	83	2070	205.88	10.759	0.247	1543.97	59380	5.527	0.181	0.511	0.77492
254	ARL13B_KAN423-21_3.tif:0003-0251	3.38	503.062	203	1286	164.001	40.566	0.328	1700.45	65398	6.293	0.159	0.691	0.853457
255	ARL13B_KAN423-21_3.tif:0004-0364	2.132	970.732	229	2519	183.182	58.793	0.563	2069.72	79600	3.574	0.28	0.816	1.0388
256	ARL13B_KAN423-21_3.tif:0005-0414	2.496	1048.17	260	2844	205.463	66.732	0.33	2616.38	100624	6.331	0.158	0.644	1.31316
257	ARL13B_KAN423-21_3.tif:0006-0491	2.626	597.634	210	1525	131.289	79.299	0.409	1569.48	60361	3.806	0.263	0.65	0.787723
258	ARL13B_KAN423-21_3.tif:0007-0618	2.86	757.782	61	2083	140.625	99.718	0.435	2167.39	83356	5.209	0.192	0.837	1.08781
259	ARL13B_KAN423-21_3.tif:0008-0694	1.586	348.426	222	484	3.279	111.959	0.52	552.637	21254	3.774	0.265	0.777	0.277369
260	ARL13B_KAN423-21_3.tif:0009-0720	1.742	438.119	185	719	86.561	116.169	0.561	763.25	29354	3.57	0.28	0.887	0.383075
261	ARL13B_KAN423-21_4.tif:0001-0059	1.456	579.518	222	1301	1.863	9.525	0.489	843.829	32453	3.983	0.251	0.747	0.423518
262	ARL13B_KAN423-21_4.tif:0002-0176	3.172	736.402	136	2480	5.333	28.609	0.327	2336.01	89841	5.446	0.184	0.687	1.17244
263	ARL13B_KAN423-21_4.tif:0003-0182	3.822	659.095	222	1345	57.63	29.362	0.546	2519.21	96887	3.633	0.275	0.838	1.26439
264	ARL13B_KAN423-21_4.tif:0004-0302	2.392	1111.76	92	2992	81.715	48.887	0.596	2659.49	102282	2.948	0.339	0.833	1.3348
265	ARL13B_KAN423-21_4.tif:0005-0336	2.418	704.731	222	1607	97.138	54.155	0.516	1704.14	65540	3.794	0.264	0.759	0.85531
266	ARL13B_KAN423-21_4.tif:0006-0358	1.56	577.55	229	1153	214.624	57.832	0.457	901.032	34653	4.017	0.249	0.706	0.452228
267	ARL13B_KAN423-21_4.tif:0007-0370	0.702	273.111	130	434	30.551	59.612	0.291	191.736	7374	4.757	0.21	0.486	0.0962321
268	ARL13B_KAN423-21_4.tif:0008-0417	3.198	448.163	87	969	107.022	67.174	0.252	1433.31	55124	6.828	0.146	0.591	0.719379
269	ARL13B_KAN423-21_4.tif:0009-0447	3.146	652.314	202	2192	53.702	72.331	0.476	2052.3	78930	3.512	0.285	0.759	1.03005
270	ARL13B_KAN423-21_4.tif:0010-0490	2.054	687.38	105	1956	83.706	79.06	0.52	1411.96	54303	2.77	0.361	0.767	0.708665
271	ARL13B_KAN423-21_4.tif:0011-0501	1.794	566.217	220	1454	81.129	80.869	0.55	1015.86	39069	3.239	0.309	0.802	0.509858
272	ARL13B_KAN423-21_4.tif:0012-0557	3.198	993.967	228	3365	106.987	89.875	0.454	3178.9	122258	4.777	0.209	0.759	1.59549
273	ARL13B_KAN423-21_4.tif:0013-0596	2.782	377.206	61	956	136.29	96.11	0.483	1049.45	40361	3.759	0.266	0.716	0.526719
274	ARL13B_KAN423-21_4.tif:0014-0672	3.172	572.434	207	1471	211.602	108.745	0.234	1815.87	69837	6.821	0.147	0.54	0.911386
275	ARL13B_KAN423-21_4.tif:0015-0700	3.354	1127.22	60	2860	60.874	112.971	0.575	3780.94	145412	2.738	0.365	0.809	1.89765
276	ARL13B_KAN423-21_4.tif:0016-0726	1.612	951.565	211	1989	122.121	117	0.592	1534.01	58997	3.378	0.296	0.78	0.769922
277	ARL13B_KAN423-21_4.tif:0017-0750	1.014	324.897	136	656	66.714	120.993	0.274	329.466	12671	5.9	0.169	0.52	0.165359
278	ARL13B_KAN423-21_4.tif:0018-0916	2.21	593.035	219	1447	100.431	147.746	0.381	1310.69	50408	5.834	0.171	0.749	0.657834
279	ARL13B_KAN423-21_5.tif:0001-0149	2.184	301.071	199	539	76.022	24.034	0.41	657.58	25290	3.983	0.251	0.636	0.330039
280	ARL13B_KAN423-21_5.tif:0002-0309	0.546	305.714	224	478	221.531	49.953	0.538	166.93	6420	3.325	0.301	0.737	0.0837822
281	ARL13B_KAN423-21_5.tif:0003-0365	1.794	462.101	205	1028	122.095	59.016	0.417	829.06	31885	5.466	0.183	0.711	0.416105
282	ARL13B_KAN423-21_5.tif:0004-0445	2.704	904.644	225	3116	85.216	71.781	0.468	2446.3	94083	4.381	0.228	0.762	1.2278
283	ARL13B_KAN423-21_5.tif:0005-0498	3.9	629.627	156	1715	164.43	80.163	0.332	2455.69	94444	6.153	0.163	0.732	1.23251
284	ARL13B_KAN423-21_5.tif:0006-0637	3.952	547.408	220	1933	80.534	102.902	0.447	2163.49	83206	3.485	0.287	0.699	1.08585
285	ARL13B_KAN423-21_5.tif:0007-0644	1.534	247.712	14	692	184.996	103.825	0.171	380.013	14615	3.483	0.287	0.397	0.190729
286	ARL13B_KAN423-21_5.tif:0008-0705	3.172	543.77	63	1541	96.228	113.819	0.332	1724.94	66340	5.366	0.186	0.659	0.86575
287	ARL13B_KAN423-21_5.tif:0009-0989	3.38	862.808	221	2814	114.068	159.593	0.394	2916.47	112165	5.077	0.197	0.714	1.46377
288	ARL13B_KAN423-21_5.tif:0010-1022	1.508	387.397	221	739	193.072	164.706	0.368	584.229	22469	5.632	0.178	0.641	0.293225
289	ARL13B_KAN423-21_6.tif:0001-0151	3.146	396.273	151	1160	43.745	24.416	0.321	1246.75	47949	5.435	0.184	0.761	0.625744
290	ARL13B_KAN423-21_6.tif:0002-0330	2.184	697.798	84	1937	176.411	53.368	0.496	1524.08	58615	4.104	0.244	0.82	0.764937
291	ARL13B_KAN423-21_6.tif:0003-0378	2.886	379.351	220	662	61.64	60.958	0.481	1094.87	42108	4.333	0.231	0.807	0.549518
292	ARL13B_KAN423-21_6.tif:0004-0427	2.236	578.674	220	1326	125.743	68.942	0.504	1293.99	49766	3.907	0.256	0.804	0.649456
293	ARL13B_KAN423-21_6.tif:0005-0504	2.574	338.394	150	715	207.425	81.624	0.426	871.078	33501	3.673	0.272	0.736	0.437195
294	ARL13B_KAN423-21_6.tif:0006-0719	4.134	714.094	183	1942	57.936	115.911	0.46	2952.24	113541	4.424	0.226	0.822	1.48173
295	ARL13B_KAN423-21_6.tif:0007-0802	3.094	499.992	171	968	97.515	129.272	0.265	1547.07	59499	7.354	0.136	0.692	0.776473
296	ARL13B_KAN423-21_6.tif:0008-0815	3.12	322.233	168	503	35.597	131.487	0.231	1005.43	38668	9.454	0.106	0.732	0.504625
297	ARL13B_KAN423-21_6.tif:0009-0902	1.794	1101.46	231	2652	166.292	145.554	0.496	1976.14	76001	4.142	0.241	0.798	0.991828
298	ARL13B_KAN423-21_6.tif:0010-0945	1.404	417.796	220	784	123.144	152.408	0.357	586.621	22561	6.491	0.154	0.651	0.294425
299	ARL13B_KAN423-21_6.tif:0011-0987	1.456	441.214	225	883	16.71	158.972	0.35	642.447	24708	4.028	0.248	0.58	0.322444
										55088.8				0.71892
300	ARL13B_KAN423-22_1.tif:0001-0114	2.054	771.152	225	1571	216.827	18.275	0.443	1584.04	60921	3.744	0.267	0.709	0.795031
301	ARL13B_KAN423-22_1.tif:0002-0391	1.794	886.696	230	2481	109.738	63.202	0.477	1590.83	61182	4.082	0.245	0.738	0.798437
302	ARL13B_KAN423-22_1.tif:0003-0410	4.342	663.916	220	1994	149.142	66.216	0.36	2882.9	110874	6.066	0.165	0.782	1.44693
303	ARL13B_KAN423-22_1.tif:0004-0523	4.004	849.987	221	2534	141.238	84.22	0.461	3403.55	130898	4.366	0.229	0.815	1.70824
304	ARL13B_KAN423-22_1.tif:0005-0750	3.146	437.727	60	1190	126.681	121.03	0.377	1377.17	52965	2.271	0.44	0.587	0.691203
305	ARL13B_KAN423-22_1.tif:0006-0920	2.574	357.192	79	847	133.962	148.229	0.248	919.467	35362	8.224	0.122	0.633	0.461481
306	ARL13B_KAN423-22_2.tif:0001-0009	0.832	411.438	133	1012	98.458	1.623	0.436	342.337	13166	3.985	0.251	0.66	0.171819
307	ARL13B_KAN423-22_2.tif:0002-0010	3.51	543.237	218	1562	131.609	1.601	0.378	1906.88	73337	5.595	0.179	0.726	0.957062
308	ARL13B_KAN423-22_2.tif:0003-0009	1.664	617.062	223	1364	212.976	1.393	0.504	1026.85	39492	4.61	0.217	0.776	0.515378
309	ARL13B_KAN423-22_2.tif:0004-0042	2.626	713.901	220	1623	167.271	6.753	0.55	1874.82	72104	3.544	0.282	0.838	0.940971
310	ARL13B_KAN423-22_2.tif:0005-0123	1.872	484.333	220	1032	56.964	19.834	0.418	906.727	34872	5.103	0.196	0.699	0.455086
311	ARL13B_KAN423-22_2.tif:0006-0263	1.066	308.098	89	613	106.049	42.607	0.196	328.452	12632	9.772	0.102	0.55	0.16485
312	ARL13B_KAN423-22_2.tif:0007-0550	2.47	596.284	185	1960	106.792	88.722	0.335	1472.91	56647	5.145	0.194	0.669	0.739254
313	ARL13B_KAN423-22_2.tif:0008-0556	3.016	951.905	225	3088	28.291	89.766	0.482	2871.12	110421	4.182	0.239	0.771	1.44102
314	ARL13B_KAN423-22_2.tif:0009-0646	0.728	387.107	228	607	62.663	104.271	0.529	281.831	10839	3.521	0.284	0.757	0.141451
315	ARL13B_KAN423-22_2.tif:0010-0853	2.08	903.475	220	2005	109.612	137.685	0.55	1879.34	72278	3.839	0.26	0.8	0.943242
316	ARL13B_KAN423-22_2.tif:0011-0889	2.158	361.494	204	717	156.606	143.444	0.394	780.151	30004	4.204	0.238	0.654	0.391558
317	ARL13B_KAN423-22_2.tif:0012-0908	2.002	396.857	181	875	141.66	146.556	0.238	794.556	30558	6.502	0.154	0.517	0.398788
318	ARL13B_KAN423-22_2.tif:0013-0941	1.274	396.082	226	837	47.169	151.843	0.34	504.638	19408	5.805	0.172	0.641	0.253278
319	ARL13B_KAN423-22_2.tif:0014-0987	1.924	592.743	228	1173	184.348	159.402	0.391	1140.51	43863	4.528	0.221	0.667	0.572421
320	ARL13B_KAN423-22_3.tif:0001-0014	0.572	300.273	223	374	223.427	2.228	0.297	171.766	6606	7.217	0.139	0.688	0.0862096
321	ARL13B_KAN423-22_3.tif:0002-0093	0.962	324.108	192	540	103.298	14.885	0.45	311.811	11992	4.29	0.233	0.74	0.156498
322	ARL13B_KAN423-22_3.tif:0003-0156	2.886	765.396	230	1785	58.991	25.173	0.358	2209.07	84959	5.763	0.174	0.712	1.10873
323	ARL13B_KAN423-22_3.tif:0004-0267	3.64	976.286	220	2739	120.222	42.882	0.518	3553.89	136680	3.08	0.325	0.776	1.7837
324	ARL13B_KAN423-22_3.tif:0005-0540	1.82	732.514	225	1938	151.061	87.186	0.503	1333.26	51276	3.784	0.264	0.782	0.669162
325	ARL13B_KAN423-22_3.tif:0006-0575	2.678	373.456	139	888	12.389	93.008	0.229	1000.18	38466	7.125	0.14	0.514	0.501989
326	ARL13B_KAN423-22_3.tif:0007-0680	3.146	593.058	88	1690	40.46	109.953	0.381	1865.87	71760	4.809	0.208	0.712	0.936482
327	ARL13B_KAN423-22_3.tif:0008-0867	2.678	461.515	164	1304	97.659	140.085	0.267	1236.01	47536	7.046	0.142	0.65	0.620354
328	ARL13B_KAN423-22_3.tif:0009-0982	2.132	492.317	175	1203	50.935	158.403	0.278	1049.68	40370	4.519	0.221	0.554	0.526836
329	ARL13B_KAN423-22_4.tif:0001-0007	2.288	446.375	109	941	154.734	0.898	0.312	1021.37	39281	4.074	0.245	0.618	0.512625
330	ARL13B_KAN423-22_4.tif:0002-0058	4.55	769.411	184	2091	173.019	9.099	0.442	3501.03	134647	2.466	0.405	0.64	1.75717
331	ARL13B_KAN423-22_4.tif:0003-0101	4.342	641.006	137	1692	67.725	16.181	0.573	2783.42	107048	2.032	0.492	0.744	1.397
332	ARL13B_KAN423-22_4.tif:0004-0268	1.638	346.952	222	699	212.311	43.319	0.306	568.342	21858	6.769	0.148	0.663	0.285251
333	ARL13B_KAN423-22_4.tif:0005-0315	1.768	668.926	200	1588	12.393	50.796	0.376	1182.73	45487	4.562	0.219	0.638	0.593614
334	ARL13B_KAN423-22_4.tif:0006-0330	5.252	686.322	159	1634	176.337	53.199	0.422	3604.78	138637	4.973	0.201	0.828	1.80924
335	ARL13B_KAN423-22_4.tif:0007-0384	2.392	703.065	241	1996	79.004	62.013	0.392	1681.83	64682	5.446	0.184	0.702	0.844113
336	ARL13B_KAN423-22_4.tif:0008-0505	0.884	409.765	222	847	117.148	81.602	0.393	362.254	13932	3.729	0.268	0.687	0.181815
337	ARL13B_KAN423-22_4.tif:0009-0510	0.858	333.97	220	504	114.211	82.186	0.58	286.563	11021	3.339	0.299	0.868	0.143826
338	ARL13B_KAN423-22_4.tif:0010-0544	1.69	724.662	242	1803	206.282	87.674	0.509	1224.75	47103	4.037	0.248	0.765	0.614703
339	ARL13B_KAN423-22_4.tif:0011-0551	3.042	574.103	223	1360	41.763	89.038	0.376	1746.53	67170	5.804	0.172	0.748	0.876581
340	ARL13B_KAN423-22_4.tif:0012-0629	2.288	474.091	20	1513	83.28	101.721	0.509	1084.79	41720	2.812	0.356	0.718	0.544454
341	ARL13B_KAN423-22_4.tif:0013-0931	3.666	454.844	159	1161	141.577	150.021	0.148	1667.56	64133	1.259	0.794	0.413	0.836948
342	ARL13B_KAN423-22_5.tif:0001-0091	4.186	469.944	225	863	127.869	14.706	0.46	1967.3	75661	4.608	0.217	0.845	0.987391
343	ARL13B_KAN423-22_5.tif:0002-0117	2.964	604.675	203	1690	185.948	18.807	0.451	1792.37	68933	4.773	0.21	0.806	0.899589
344	ARL13B_KAN423-22_5.tif:0003-0128	2.678	621.019	200	1741	21.536	20.458	0.178	1663.19	63965	10.818	0.092	0.527	0.834756
345	ARL13B_KAN423-22_5.tif:0004-0279	1.17	397.844	174	974	6.083	44.987	0.368	465.506	17903	5.032	0.199	0.621	0.233638
346	ARL13B_KAN423-22_5.tif:0005-0306	2.73	620.781	158	1692	91.492	49.443	0.5	1694.83	65182	3.23	0.31	0.753	0.850638
347	ARL13B_KAN423-22_5.tif:0006-0330	3.562	723.832	220	1892	139.673	53.303	0.53	2578.45	99165	3.803	0.263	0.846	1.29412
348	ARL13B_KAN423-22_5.tif:0007-0337	3.25	598.688	222	1867	158.731	54.263	0.476	1945.85	74836	4.227	0.237	0.786	0.976624
349	ARL13B_KAN423-22_5.tif:0008-0456	3.146	339.488	73	657	203.761	73.783	0.264	1068.09	41078	7.18	0.139	0.611	0.536076
350	ARL13B_KAN423-22_5.tif:0009-0513	4.056	535.513	220	1250	61.114	82.657	0.435	2172.17	83540	5.012	0.2	0.761	1.09021
351	ARL13B_KAN423-22_5.tif:0010-0542	2.938	583.637	206	1569	187.066	87.431	0.274	1714.83	65951	7.645	0.131	0.671	0.860673
352	ARL13B_KAN423-22_5.tif:0011-0533	3.12	788.192	102	2175	207.78	86.126	0.486	2459.31	94583	3.51	0.285	0.748	1.23433
353	ARL13B_KAN423-22_5.tif:0012-0622	3.302	626.008	220	1802	215.092	100.246	0.401	2067.2	79503	4.954	0.202	0.734	1.03753
354	ARL13B_KAN423-22_5.tif:0013-0673	4.342	396.395	220	780	142.718	108.691	0.329	1721.25	66198	6.772	0.148	0.721	0.863897
355	ARL13B_KAN423-22_5.tif:0014-0728	1.56	363.733	109	983	9.812	117.444	0.383	567.458	21824	5.493	0.182	0.75	0.284807
356	ARL13B_KAN423-22_5.tif:0015-0782	2.444	489.468	134	1103	19.455	126.146	0.53	1196.33	46010	3.813	0.262	0.797	0.600439
357	ARL13B_KAN423-22_5.tif:0016-0813	3.042	608.41	196	1358	212.042	131.287	0.319	1850.89	71184	4.262	0.235	0.579	0.928965
358	ARL13B_KAN423-22_5.tif:0017-1014	1.846	540.338	227	1476	11.375	163.754	0.573	997.524	38364	2.853	0.35	0.78	0.500658
359	ARL13B_KAN423-22_6.tif:0001-0024	2.86	755.273	250	1559	65.29	4.031	0.372	2160.21	83080	6.035	0.166	0.794	1.08421
360	ARL13B_KAN423-22_6.tif:0002-0050	2.34	536.289	116	1276	39.565	8.071	0.35	1254.99	48266	5.495	0.182	0.7	0.629881
361	ARL13B_KAN423-22_6.tif:0003-0049	0.676	346.654	225	693	91.106	7.802	0.288	234.352	9013	6.859	0.146	0.598	0.117621
362	ARL13B_KAN423-22_6.tif:0004-0124	2.184	857.393	251	2247	190.897	20.189	0.417	1872.66	72021	4.083	0.245	0.677	0.939888
363	ARL13B_KAN423-22_6.tif:0005-0175	3.51	675.763	220	1931	34.42	28.418	0.258	2372.07	91228	7.747	0.129	0.612	1.19054
364	ARL13B_KAN423-22_6.tif:0006-0375	2.418	626.871	219	1407	33.142	60.516	0.342	1515.87	58299	5.41	0.185	0.644	0.760813
365	ARL13B_KAN423-22_6.tif:0007-0419	1.794	619.072	220	1812	169.989	67.483	0.401	1110.68	42716	5.319	0.188	0.742	0.557452
366	ARL13B_KAN423-22_6.tif:0008-0480	3.042	754.043	154	2168	23.449	77.504	0.334	2293.94	88223	7.232	0.138	0.818	1.15133
367	ARL13B_KAN423-22_6.tif:0009-0533	2.21	658.918	232	1380	89.252	86.12	0.338	1456.3	56008	4.612	0.217	0.627	0.730915
368	ARL13B_KAN423-22_6.tif:0010-0661	1.612	719.516	220	1568	177.133	106.625	0.516	1159.93	44610	3.921	0.255	0.775	0.582169
369	ARL13B_KAN423-22_6.tif:0011-0702	2.392	1048.63	222	2383	216.759	113.234	0.434	2508.47	96474	4.995	0.2	0.78	1.259
370	ARL13B_KAN423-22_6.tif:0012-0725	1.534	703.678	249	2019	58.352	117.039	0.468	1079.51	41517	3.867	0.259	0.711	0.541805
371	ARL13B_KAN423-22_6.tif:0013-0889	0.65	336.08	223	569	4.073	143.4	0.49	218.465	8402	3.41	0.293	0.781	0.109648
372	ARL13B_KAN423-22_6.tif:0014-0897	2.496	711.802	228	1690	40.294	144.488	0.341	1776.77	68333	6.439	0.155	0.727	0.891759
373	ARL13B_KAN423-22_6.tif:0015-1013	1.274	568.082	226	1344	94.886	163.404	0.528	723.78	27836	3.695	0.271	0.784	0.363265
374	ARL13B_KAN423-22_7.tif:0001-0191	0.962	328.486	221	518	205.191	30.967	0.515	316.023	12154	3.812	0.262	0.673	0.158612
375	ARL13B_KAN423-22_7.tif:0002-0235	2.574	484.051	226	937	220.423	37.842	0.421	1246.02	47921	5.31	0.188	0.789	0.625378
376	ARL13B_KAN423-22_7.tif:0003-0340	2.236	1072.51	220	3272	108.521	54.789	0.494	2398.28	92236	4.438	0.225	0.758	1.2037
377	ARL13B_KAN423-22_7.tif:0004-0446	2.938	704.381	109	3463	58.295	71.974	0.326	2069.59	79595	6.266	0.16	0.683	1.03873
378	ARL13B_KAN423-22_7.tif:0005-0615	4.16	512.169	220	967	19.573	99.063	0.425	2130.75	81947	5.131	0.195	0.766	1.06942
379	ARL13B_KAN423-22_7.tif:0006-0614	2.418	987.194	221	2396	193.522	99.012	0.501	2387.18	91809	3.889	0.257	0.795	1.19813
380	ARL13B_KAN423-22_7.tif:0007-0643	4.42	689.976	220	1595	82.049	103.996	0.391	3049.88	117296	4.593	0.218	0.707	1.53074
381	ARL13B_KAN423-22_7.tif:0008-0676	3.354	620.442	123	1610	208.103	108.712	0.459	2081.09	80037	2.064	0.485	0.645	1.0445
382	ARL13B_KAN423-22_7.tif:0009-0774	3.536	752.971	148	2229	78.608	124.803	0.361	2662.66	102404	4.332	0.231	0.659	1.33639
383	ARL13B_KAN423-22_7.tif:0010-0881	1.82	508.886	220	917	16.067	141.9	0.399	926.228	35622	3.158	0.317	0.622	0.464874
384	ARL13B_KAN423-22_7.tif:0011-0991	2.262	686.149	221	1554	173.665	159.883	0.354	1552.16	59695	6.224	0.161	0.725	0.779031
										59633				0.778223
385	ARL13B_KAN423-23_1.tif:0001-0012	2.652	401.892	229	828	188.903	1.767	0.379	1065.88	40993	3.772	0.265	0.622	0.534967
386	ARL13B_KAN423-23_1.tif:0002-0005	2.028	441.513	223	806	222.116	0.854	0.537	895.442	34438	4.059	0.246	0.912	0.449423
387	ARL13B_KAN423-23_1.tif:0003-0075	3.146	391.917	186	841	102.911	12.201	0.44	1233.05	47422	4.34	0.23	0.731	0.618866
388	ARL13B_KAN423-23_1.tif:0004-0107	4.446	477.871	223	1170	175.314	17.381	0.427	2124.74	81716	4.299	0.233	0.704	1.06641
389	ARL13B_KAN423-23_1.tif:0005-0149	3.692	531.81	221	1228	116.22	24.033	0.565	1963.56	75517	3.219	0.311	0.787	0.985511
390	ARL13B_KAN423-23_1.tif:0006-0173	3.432	425.818	222	857	52.283	28.007	0.496	1461.5	56208	4.223	0.237	0.772	0.733525
391	ARL13B_KAN423-23_1.tif:0007-0231	4.03	627.239	232	1464	157.862	37.263	0.55	2527.92	97222	3.706	0.27	0.814	1.26877
392	ARL13B_KAN423-23_1.tif:0008-0240	3.302	474.15	224	1041	68.829	38.704	0.535	1565.74	60217	3.826	0.261	0.864	0.785843
393	ARL13B_KAN423-23_1.tif:0009-0410	3.588	651.652	165	2015	195.798	66.426	0.461	2338.27	89928	3.141	0.318	0.706	1.17358
394	ARL13B_KAN423-23_1.tif:0010-0438	1.95	380.2	220	605	189.012	70.573	0.591	741.435	28515	3.354	0.298	0.75	0.372126
395	ARL13B_KAN423-23_1.tif:0011-0454	4.342	963.497	225	2047	108.545	73.184	0.584	4183.76	160904	3.2	0.312	0.865	2.09983
396	ARL13B_KAN423-23_1.tif:0012-0471	4.108	492.095	222	1052	7.014	75.975	0.443	2021.65	77751	4.287	0.233	0.723	1.01467
397	ARL13B_KAN423-23_1.tif:0013-0579	3.51	734.652	213	2047	205.326	93.374	0.417	2578.78	99178	5.194	0.193	0.818	1.29429
398	ARL13B_KAN423-23_1.tif:0014-0633	3.666	460.993	224	864	32.415	102.02	0.456	1690.1	65000	4.58	0.218	0.797	0.848263
399	ARL13B_KAN423-23_1.tif:0015-0714	2.418	385.011	215	656	11.923	115.43	0.269	931.012	35806	6.292	0.159	0.594	0.467275
400	ARL13B_KAN423-23_1.tif:0016-0762	2.626	582.861	223	1286	158.936	122.94	0.435	1530.69	58869	4.598	0.217	0.768	0.768252
401	ARL13B_KAN423-23_1.tif:0017-0790	3.25	562.752	220	1328	211.682	127.464	0.26	1829.05	70344	6.589	0.152	0.597	0.918003
402	ARL13B_KAN423-23_1.tif:0018-0786	2.054	580.62	222	1517	94.061	126.901	0.413	1192.67	45869	4.973	0.201	0.702	0.598599
403	ARL13B_KAN423-23_1.tif:0019-0809	2.756	573.557	220	1638	178.714	130.649	0.328	1580.82	60797	6.353	0.157	0.625	0.793413
404	ARL13B_KAN423-23_1.tif:0020-0846	1.716	382.742	207	689	167.783	136.276	0.524	656.826	25261	3.496	0.286	0.81	0.329661
405	ARL13B_KAN423-23_1.tif:0021-0865	3.484	1124.78	222	2870	196.729	139.501	0.396	3918.96	150720	5.448	0.184	0.772	1.96693
406	ARL13B_KAN423-23_1.tif:0022-0995	2.808	526.898	221	1038	137.64	160.383	0.594	1479.62	56905	3.169	0.316	0.84	0.742621
407	ARL13B_KAN423-23_2.tif:0001-0100	4.056	629.987	224	2174	124.214	16.018	0.477	2555.38	98278	4.029	0.248	0.786	1.28255
408	ARL13B_KAN423-23_2.tif:0002-0105	1.612	471.355	222	1059	147.229	16.96	0.319	759.87	29224	6.976	0.143	0.66	0.381379
409	ARL13B_KAN423-23_2.tif:0003-0180	4.862	406.925	227	867	55.183	29.116	0.386	1978.59	76095	5.171	0.193	0.73	0.993054
410	ARL13B_KAN423-23_2.tif:0004-0188	1.794	879.348	222	2059	107.861	30.445	0.596	1577.64	60675	3.709	0.27	0.902	0.79182
411	ARL13B_KAN423-23_2.tif:0005-0217	2.288	517.455	225	1025	205.53	35.004	0.503	1184.01	45536	3.98	0.251	0.772	0.594254
412	ARL13B_KAN423-23_2.tif:0006-0258	2.392	687.565	202	1436	205.764	41.702	0.475	1644.76	63256	4.136	0.242	0.757	0.825503
413	ARL13B_KAN423-23_2.tif:0007-0302	4.186	723.037	221	2081	14.846	48.556	0.416	3026.82	116409	4.963	0.202	0.735	1.51916
414	ARL13B_KAN423-23_2.tif:0008-0340	1.872	1200.69	235	3804	52.341	54.98	0.564	2247.84	86450	3.608	0.277	0.796	1.12819
415	ARL13B_KAN423-23_2.tif:0009-0349	5.018	707.549	221	2436	103.8	56.503	0.459	3550.7	136557	4.471	0.224	0.827	1.7821
416	ARL13B_KAN423-23_2.tif:0010-0517	4.03	552.845	156	1366	68.724	83.401	0.343	2228.1	85691	5.432	0.184	0.664	1.11828
417	ARL13B_KAN423-23_2.tif:0011-0522	3.926	957.808	220	2018	170.903	84.127	0.484	3760.58	144629	4.338	0.231	0.827	1.88744
418	ARL13B_KAN423-23_2.tif:0012-0657	4.394	621.609	220	2011	180.82	106.202	0.355	2731.52	105052	5.526	0.181	0.761	1.37095
419	ARL13B_KAN423-23_2.tif:0013-0696	3.822	597.81	77	1841	43.741	112.331	0.55	2284.97	87878	2.616	0.382	0.744	1.14682
420	ARL13B_KAN423-23_2.tif:0014-0709	4.706	650.254	210	1258	55.258	114.397	0.345	3060.28	117696	6.475	0.154	0.862	1.53596
421	ARL13B_KAN423-23_2.tif:0015-0781	2.444	775.851	227	2654	103.08	125.754	0.339	1896.29	72930	5.627	0.178	0.646	0.951751
422	ARL13B_KAN423-23_2.tif:0016-0809	4.42	734.153	156	1888	147.659	130.587	0.287	3245.15	124806	7.259	0.138	0.742	1.62874
423	ARL13B_KAN423-23_2.tif:0017-0829	4.082	698.223	229	1649	44.827	133.751	0.468	2850.32	109621	4.642	0.215	0.835	1.43058
424	ARL13B_KAN423-23_2.tif:0018-0876	1.17	499.044	221	925	127.69	141.328	0.513	583.917	22457	3.331	0.3	0.72	0.293068
425	ARL13B_KAN423-23_2.tif:0019-0896	1.95	697.627	223	1629	186.346	144.365	0.47	1360.45	52322	4.509	0.222	0.743	0.682812
426	ARL13B_KAN423-23_2.tif:0020-1007	4.68	700.328	207	2038	69.293	162.329	0.321	3277.73	126059	6.258	0.16	0.692	1.64509
427	ARL13B_KAN423-23_2.tif:0021-1019	2.288	472.023	164	1004	52.478	164.4	0.301	1080.05	41538	7.585	0.132	0.69	0.542079
428	ARL13B_KAN423-23_2.tif:0022-1025	2.34	595.078	148	1489	154.44	165.328	0.359	1392.57	53557	6.314	0.158	0.779	0.698929
429	ARL13B_KAN423-23_2.tif:0023-1024	2.158	650.072	166	1904	28.515	164.991	0.492	1402.94	53956	3.16	0.316	0.683	0.704136
430	ARL13B_KAN423-23_2.tif:0024-1032	2.288	529.773	133	1365	213.7	166.602	0.335	1212.19	46620	5.079	0.197	0.613	0.6084
431	ARL13B_KAN423-23_3.tif:0001-0131	2.99	408.322	177	1070	138.969	21.22	0.286	1220.96	46957	6.252	0.16	0.663	0.612798
432	ARL13B_KAN423-23_3.tif:0002-0217	2.236	589.453	234	1074	197.451	35.036	0.416	1318.1	50693	5.125	0.195	0.823	0.661553
433	ARL13B_KAN423-23_3.tif:0003-0340	4.654	856.849	184	2450	187.745	54.517	0.489	3988.02	153376	3.111	0.321	0.722	2.00159
434	ARL13B_KAN423-23_3.tif:0004-0361	0.702	351.407	228	488	137.961	58.298	0.599	246.703	9488	3.739	0.267	0.73	0.12382
435	ARL13B_KAN423-23_3.tif:0005-0452	3.328	827.141	27	2558	17.506	73.094	0.479	2752.89	105874	1.725	0.58	0.681	1.38168
436	ARL13B_KAN423-23_3.tif:0006-0452	1.664	634.594	173	1361	221.023	72.882	0.53	1056.03	40614	3.577	0.28	0.805	0.530021
437	ARL13B_KAN423-23_3.tif:0007-0495	3.068	707.924	200	1995	130.968	79.782	0.368	2172.04	83535	5.953	0.168	0.742	1.09015
438	ARL13B_KAN423-23_3.tif:0008-0517	2.522	496.021	226	1178	193.453	83.332	0.367	1251.04	48114	4.607	0.217	0.616	0.627897
439	ARL13B_KAN423-23_3.tif:0009-0632	4.03	876	169	2311	86.349	101.888	0.571	3530.49	135780	3.368	0.297	0.827	1.77196
440	ARL13B_KAN423-23_3.tif:0010-0642	1.924	651.959	224	1937	45.235	103.706	0.495	1254.45	48245	4.099	0.244	0.729	0.629607
441	ARL13B_KAN423-23_3.tif:0011-0687	3.822	626.15	107	2064	198.248	110.84	0.314	2393.29	92044	7.869	0.127	0.878	1.20119
442	ARL13B_KAN423-23_3.tif:0012-0713	3.276	676.262	82	1914	123.439	115.17	0.498	2215.57	85209	3.899	0.256	0.79	1.11199
443	ARL13B_KAN423-23_3.tif:0013-0733	2.366	374.066	223	841	56.991	118.123	0.521	885.093	34040	3.345	0.299	0.752	0.444229
444	ARL13B_KAN423-23_3.tif:0014-0766	4.16	624.275	182	1537	82.006	123.474	0.495	2597.14	99884	4.112	0.243	0.796	1.30351
445	ARL13B_KAN423-23_3.tif:0015-1001	2.626	837.198	134	2037	31.757	161.446	0.539	2198.61	84557	3.191	0.313	0.768	1.10349
446	ARL13B_KAN423-23_3.tif:0016-1015	2.002	378.286	207	618	111.986	163.691	0.305	757.374	29128	7.318	0.137	0.703	0.380126
447	ARL13B_KAN423-23_3.tif:0017-1017	1.69	444.231	157	1166	184.523	164.342	0.337	750.795	28875	5.757	0.174	0.71	0.376824
448	ARL13B_KAN423-23_4.tif:0001-0007	2.912	1389.28	231	3104	48.769	1.171	0.562	4045.82	155599	3.407	0.294	0.892	2.0306
449	ARL13B_KAN423-23_4.tif:0002-0036	1.69	559.369	251	946	203.015	5.851	0.366	945.391	36359	5.982	0.167	0.734	0.474492
450	ARL13B_KAN423-23_4.tif:0003-0047	3.692	592.944	209	1386	61.845	7.456	0.575	2189.28	84198	2.915	0.343	0.798	1.0988
451	ARL13B_KAN423-23_4.tif:0004-0186	2.6	414.18	221	781	131.228	30.02	0.489	1076.93	41418	4.517	0.221	0.797	0.540513
452	ARL13B_KAN423-23_4.tif:0005-0335	2.782	1031.2	220	2328	133.662	54.127	0.447	2868.96	110338	4.587	0.218	0.778	1.43993
453	ARL13B_KAN423-23_4.tif:0006-0342	2.028	859.513	245	1916	119.346	55.172	0.444	1743.2	67042	4.595	0.218	0.825	0.874911
454	ARL13B_KAN423-23_4.tif:0007-0374	2.418	972.194	220	3333	27.42	60.431	0.354	2350.91	90414	6.467	0.155	0.705	1.17992
455	ARL13B_KAN423-23_4.tif:0008-0426	3.562	1004.38	226	2402	132.92	68.655	0.432	3577.82	137600	5.037	0.199	0.774	1.79571
456	ARL13B_KAN423-23_4.tif:0009-0543	4.576	621.994	221	1626	217.893	87.496	0.387	2846.42	109471	6.373	0.157	0.828	1.42862
457	ARL13B_KAN423-23_4.tif:0010-0546	2.834	453.807	109	839	130.28	87.87	0.529	1286.17	49465	2.763	0.362	0.734	0.645528
458	ARL13B_KAN423-23_4.tif:0011-0627	2.6	914.4	227	1939	196.485	101.125	0.447	2377.58	91440	4.833	0.207	0.778	1.19331
459	ARL13B_KAN423-23_4.tif:0012-0745	2.262	820.575	220	2284	20.076	120.14	0.549	1856.25	71390	3.093	0.323	0.791	0.931653
460	ARL13B_KAN423-23_4.tif:0013-0751	2.73	631.419	244	1338	4.788	121.15	0.316	1723.88	66299	6.915	0.145	0.709	0.865215
461	ARL13B_KAN423-23_4.tif:0014-0802	2.262	966.322	230	2536	43.833	129.366	0.493	2185.95	84070	4.183	0.239	0.773	1.09713
462	ARL13B_KAN423-23_4.tif:0015-0967	2.418	592.333	198	1276	32.294	155.935	0.476	1432.35	55087	4.649	0.215	0.89	0.718896
463	ARL13B_KAN423-23_4.tif:0016-0992	2.366	591.253	223	1200	6.765	159.987	0.3	1398.99	53804	7.258	0.138	0.669	0.702153
464	ARL13B_KAN423-23_5.tif:0001-0077	2.73	1151.06	228	3404	83.733	12.463	0.592	3142.57	120861	3.396	0.294	0.847	1.57726
465	ARL13B_KAN423-23_5.tif:0002-0159	2.132	624.951	221	1740	14.951	25.696	0.302	1332.48	51246	5.36	0.187	0.539	0.66877
466	ARL13B_KAN423-23_5.tif:0003-0162	2.002	613.286	222	1422	162.912	26.115	0.512	1227.87	47223	3.198	0.313	0.697	0.616269
467	ARL13B_KAN423-23_5.tif:0004-0186	2.366	1066.52	225	2422	35.57	29.983	0.565	2523.53	97053	3.508	0.285	0.85	1.26656
468	ARL13B_KAN423-23_5.tif:0005-0221	3.068	983.593	224	3121	198.342	35.639	0.422	3017.85	116064	5.114	0.196	0.738	1.51466
469	ARL13B_KAN423-23_5.tif:0006-0263	4.29	953.994	173	2676	49.666	42.442	0.514	4092.88	157409	3.19	0.313	0.771	2.05422
470	ARL13B_KAN423-23_5.tif:0007-0263	2.34	580.2	156	1336	128.034	42.477	0.253	1357.75	52218	7.319	0.137	0.608	0.681455
471	ARL13B_KAN423-23_5.tif:0008-0380	2.99	779.478	209	1550	37.277	61.358	0.591	2330.78	89640	3.067	0.326	0.824	1.16982
472	ARL13B_KAN423-23_5.tif:0009-0432	3.666	1034.09	220	2827	22.302	69.824	0.467	3791.21	145807	3.778	0.265	0.732	1.90281
473	ARL13B_KAN423-23_5.tif:0010-0460	4.082	538.573	220	1668	38.155	74.164	0.337	2198.59	84556	6.637	0.151	0.771	1.10347
474	ARL13B_KAN423-23_5.tif:0011-0473	4.446	783.912	97	2394	193.244	76.575	0.334	3485.48	134049	4.144	0.241	0.655	1.74937
475	ARL13B_KAN423-23_5.tif:0012-0465	3.458	1139.24	220	3246	133.375	75.009	0.534	3939.73	151519	3.46	0.289	0.785	1.97735
476	ARL13B_KAN423-23_5.tif:0013-0469	3.146	743.62	212	1674	95.148	75.659	0.525	2339.57	89978	3.701	0.27	0.837	1.17423
477	ARL13B_KAN423-23_5.tif:0014-0498	2.47	674.158	222	1639	43.138	80.378	0.448	1665.27	64045	4.384	0.228	0.736	0.8358
478	ARL13B_KAN423-23_5.tif:0015-0693	3.224	837.129	222	2112	105.805	111.833	0.488	2699.07	103804	4.193	0.239	0.8	1.35466
479	ARL13B_KAN423-23_5.tif:0016-0699	2.574	703.02	220	1786	208.719	112.721	0.369	1809.68	69599	5.163	0.194	0.685	0.90828
480	ARL13B_KAN423-23_5.tif:0017-0704	2.86	900.327	220	2127	62.7	113.677	0.575	2575.09	99036	3.171	0.315	0.806	1.29244
481	ARL13B_KAN423-23_5.tif:0018-0711	1.95	679.88	227	1688	131.841	114.648	0.521	1325.85	50991	4.007	0.25	0.75	0.665442
482	ARL13B_KAN423-23_5.tif:0019-0737	2.99	695.974	150	1710	163.282	118.552	0.405	2081.09	80037	3	0.333	0.613	1.0445
483	ARL13B_KAN423-23_5.tif:0020-0793	2.496	983.292	225	2177	192.062	128.033	0.477	2454.44	94396	3.778	0.265	0.727	1.23189
484	ARL13B_KAN423-23_5.tif:0021-0940	1.326	492	222	823	76.776	151.551	0.471	652.431	25092	4.337	0.231	0.756	0.327455
485	ARL13B_KAN423-23_5.tif:0022-0957	2.418	755.355	213	1764	165.958	154.236	0.471	1826.56	70248	4.191	0.239	0.769	0.91675
486	ARL13B_KAN423-23_6.tif:0001-0141	2.912	779.464	137	2818	28.099	22.856	0.381	2269.94	87300	5.341	0.187	0.7	1.13928
487	ARL13B_KAN423-23_6.tif:0002-0175	3.458	686.338	220	1812	214.37	28.147	0.271	2373.5	91283	6.93	0.144	0.652	1.19126
488	ARL13B_KAN423-23_6.tif:0003-0230	2.99	800.113	220	2480	89.014	36.94	0.447	2392.48	92013	4.689	0.213	0.774	1.20079
489	ARL13B_KAN423-23_6.tif:0004-0247	3.432	609.432	220	1305	52.514	39.966	0.444	2091.7	80445	4.749	0.211	0.776	1.04982
490	ARL13B_KAN423-23_6.tif:0005-0322	3.744	643.736	17	2210	66.841	51.882	0.477	2410.29	92698	3.276	0.305	0.738	1.20973
491	ARL13B_KAN423-23_6.tif:0006-0422	3.406	1254.68	220	2964	183.904	68.085	0.47	4273.69	164363	4.249	0.235	0.848	2.14497
492	ARL13B_KAN423-23_6.tif:0007-0493	2.158	602.892	222	1564	7.784	79.398	0.303	1301.12	50040	7.758	0.129	0.651	0.653032
493	ARL13B_KAN423-23_6.tif:0008-0533	3.848	1249.45	222	3201	183.453	85.916	0.392	4808.18	184919	4.558	0.219	0.759	2.41323
494	ARL13B_KAN423-23_6.tif:0009-0574	2.964	894.921	222	2081	206.394	92.526	0.384	2652.71	102021	4.213	0.237	0.689	1.33139
495	ARL13B_KAN423-23_6.tif:0010-0795	2.756	758.198	189	1912	113.657	128.291	0.512	2089.72	80369	3.508	0.285	0.754	1.04883
496	ARL13B_KAN423-23_6.tif:0011-0828	2.496	346.125	143	730	179.706	133.586	0.362	863.98	33228	4.426	0.226	0.64	0.433632
497	ARL13B_KAN423-23_6.tif:0012-0853	2.054	671.291	161	1488	35.382	137.715	0.424	1378.91	53032	5.199	0.192	0.775	0.692078
498	ARL13B_KAN423-23_6.tif:0013-0928	2.6	862.28	226	1792	134.671	149.663	0.472	2242.06	86228	4.556	0.219	0.797	1.12529
499	ARL13B_KAN423-23_6.tif:0014-0929	2.132	452.488	220	933	14.558	149.717	0.514	964.762	37104	4.115	0.243	0.788	0.484214
500	ARL13B_KAN423-23_6.tif:0015-0961	2.002	672.221	195	1409	101.05	155.061	0.43	1345.87	51761	4.128	0.242	0.703	0.675491
										79646.2				1.0394
501	ARL13B_KAN423-24_1.tif:0001-0070	1.248	484.917	198	1163	223.462	11.197	0.477	605.212	23276	3.612	0.277	0.807	0.303756
502	ARL13B_KAN423-24_1.tif:0002-0105	2.6	653.03	223	2211	186.265	16.917	0.405	1697.98	65303	4.576	0.219	0.664	0.852217
503	ARL13B_KAN423-24_1.tif:0003-0167	3.718	459.608	140	1568	85.631	26.734	0.38	1708.93	65724	3.568	0.28	0.614	0.857711
504	ARL13B_KAN423-24_1.tif:0004-0237	2.314	468.079	206	1067	161.41	38.569	0.409	1083.2	41659	3.332	0.3	0.712	0.543658
505	ARL13B_KAN423-24_1.tif:0005-0256	2.574	547.636	215	1249	42.766	41.278	0.558	1409.7	54216	3.693	0.271	0.843	0.707529
506	ARL13B_KAN423-24_1.tif:0006-0262	0.936	367.611	230	611	221.45	42.342	0.552	344.105	13234	3.542	0.282	0.774	0.172706
507	ARL13B_KAN423-24_1.tif:0007-0401	4.16	533.769	98	1890	42.774	64.395	0.305	2220.61	85403	6.178	0.162	0.717	1.11453
508	ARL13B_KAN423-24_1.tif:0008-0547	3.484	406.478	127	958	43.771	88.135	0.327	1416.25	54468	7.185	0.139	0.73	0.710818
509	ARL13B_KAN423-24_1.tif:0009-0588	2.366	431.769	87	1071	202.253	94.803	0.346	1021.63	39291	5.36	0.187	0.684	0.512755
510	ARL13B_KAN423-24_1.tif:0010-0655	2.444	525.287	212	1244	154.779	105.831	0.402	1283.88	49377	4.037	0.248	0.62	0.644379
511	ARL13B_KAN423-24_1.tif:0011-0747	2.938	455.991	220	933	32.796	120.432	0.417	1339.78	51527	5.35	0.187	0.751	0.672437
512	ARL13B_KAN423-24_1.tif:0012-0900	2.314	455.247	221	865	78.943	145.28	0.514	1053.51	40517	3.917	0.255	0.824	0.528755
513	ARL13B_KAN423-24_1.tif:0013-0921	2.262	550.885	228	1193	136.135	148.44	0.5	1246.18	47927	3.806	0.263	0.787	0.625457
514	ARL13B_KAN423-24_2.tif:0001-0114	1.248	480.833	231	1197	121.851	18.43	0.471	600.116	23080	4.359	0.229	0.738	0.301198
515	ARL13B_KAN423-24_2.tif:0002-0199	2.964	954.982	222	3047	26.029	32.455	0.387	2830.74	108868	4.234	0.236	0.677	1.42075
516	ARL13B_KAN423-24_2.tif:0003-0389	4.082	572.815	223	1196	73.318	62.672	0.54	2338.37	89932	3.505	0.285	0.86	1.17363
517	ARL13B_KAN423-24_2.tif:0004-0412	3.64	952.471	121	2933	92.242	66.449	0.457	3467.2	133346	4.833	0.207	0.802	1.74019
518	ARL13B_KAN423-24_2.tif:0005-0651	2.392	602.565	229	1307	166.526	105.056	0.526	1441.42	55436	3.393	0.295	0.733	0.723451
519	ARL13B_KAN423-24_2.tif:0006-0796	0.962	260.216	188	386	190.6	128.392	0.356	250.343	9628	4.876	0.205	0.661	0.125647
520	ARL13B_KAN423-24_2.tif:0007-0906	2.158	554.422	222	1271	223.157	146.387	0.378	1196.51	46017	5.039	0.198	0.779	0.600531
521	ARL13B_KAN423-24_2.tif:0008-0920	2.756	393.972	220	761	24.703	148.379	0.464	1085.85	41761	4.608	0.217	0.739	0.544989
522	ARL13B_KAN423-24_2.tif:0009-0923	1.976	450.355	225	1181	188.323	148.821	0.362	889.956	34227	5.127	0.195	0.631	0.446669
523	ARL13B_KAN423-24_2.tif:0010-0974	1.326	320.392	187	591	30.617	156.993	0.422	424.866	16340	4.103	0.244	0.745	0.21324
524	ARL13B_KAN423-24_2.tif:0011-0986	2.262	367.828	184	810	121.941	159.023	0.378	832.076	32001	6.182	0.162	0.76	0.417619
525	ARL13B_KAN423-24_3.tif:0001-0056	1.768	462.794	221	983	147.112	9.17	0.518	818.269	31470	3.661	0.273	0.777	0.41069
526	ARL13B_KAN423-24_3.tif:0002-0091	2.756	609.651	220	1234	119.219	14.689	0.585	1680.3	64623	3.361	0.298	0.851	0.843343
527	ARL13B_KAN423-24_3.tif:0003-0301	2.132	517.451	173	968	50.214	48.741	0.574	1103.27	42431	2.851	0.351	0.804	0.553733
528	ARL13B_KAN423-24_3.tif:0004-0347	3.692	968.81	221	2593	208.182	55.889	0.529	3577.06	137571	3.873	0.258	0.765	1.79533
529	ARL13B_KAN423-24_3.tif:0005-0384	2.782	1007.06	221	2955	27.972	61.833	0.527	2801.8	107755	3.615	0.277	0.829	1.40622
530	ARL13B_KAN423-24_3.tif:0006-0479	1.69	469.462	223	930	6.379	77.265	0.518	793.438	30515	3.947	0.253	0.774	0.398227
531	ARL13B_KAN423-24_3.tif:0007-0515	4.264	904.427	219	2214	41.549	83.12	0.417	3856.71	148326	4.369	0.229	0.705	1.93568
532	ARL13B_KAN423-24_3.tif:0008-0612	0.884	404.324	228	819	158.385	98.671	0.509	357.444	13747	3.708	0.27	0.708	0.179401
533	ARL13B_KAN423-24_3.tif:0009-0739	1.17	514.756	189	1450	55.827	119.115	0.422	602.3	23164	4.083	0.245	0.647	0.302295
534	ARL13B_KAN423-24_3.tif:0010-0800	2.808	500.241	49	1379	198.475	128.897	0.373	1404.76	54026	5.022	0.199	0.645	0.70505
535	ARL13B_KAN423-24_3.tif:0011-0804	2.21	555.024	155	1195	209.1	129.665	0.34	1226.68	47177	6.061	0.165	0.73	0.615669
536	ARL13B_KAN423-24_3.tif:0012-0860	3.614	820.734	226	2809	140.761	138.928	0.399	2966.31	114082	5.721	0.175	0.866	1.48879
537	ARL13B_KAN423-24_3.tif:0013-0912	0.936	377.111	224	733	82.564	147.199	0.575	352.997	13576	3.566	0.28	0.742	0.177169
538	ARL13B_KAN423-24_3.tif:0014-0927	1.404	422.389	196	965	154.188	149.216	0.246	593.07	22809	4.315	0.232	0.448	0.297662
539	ARL13B_KAN423-24_3.tif:0015-1019	1.352	259.923	219	330	114.109	164.37	0.352	351.437	13516	5.792	0.173	0.684	0.176386
540	ARL13B_KAN423-24_4.tif:0001-0006	1.248	512.75	221	1047	97.674	0.991	0.597	639.951	24612	3.507	0.285	0.821	0.321191
541	ARL13B_KAN423-24_4.tif:0002-0080	1.898	795.603	213	3044	28.587	12.974	0.478	1510.14	58079	4.051	0.247	0.73	0.757942
542	ARL13B_KAN423-24_4.tif:0003-0292	2.912	685.786	228	2207	98.836	47.199	0.337	1997.13	76808	6.227	0.161	0.739	1.00236
543	ARL13B_KAN423-24_4.tif:0004-0340	3.718	781.294	32	2157	86.848	54.714	0.453	2905.03	111725	3.33	0.3	0.675	1.45803
544	ARL13B_KAN423-24_4.tif:0005-0383	1.144	590.614	225	1471	47.371	61.843	0.434	675.703	25987	4.476	0.223	0.682	0.339135
545	ARL13B_KAN423-24_4.tif:0006-0395	2.418	348.968	151	785	111.05	63.828	0.267	843.855	32454	6.028	0.166	0.539	0.423531
546	ARL13B_KAN423-24_4.tif:0007-0498	3.042	545.427	163	1676	51.778	80.325	0.453	1659.29	63815	4.857	0.206	0.86	0.832798
547	ARL13B_KAN423-24_4.tif:0008-0514	2.548	653.857	189	1922	205.827	82.812	0.48	1666.13	64078	4.097	0.244	0.781	0.83623
548	ARL13B_KAN423-24_4.tif:0009-0658	2.548	459.265	217	1443	56.072	106.121	0.383	1170.28	45008	5.685	0.176	0.708	0.587363
549	ARL13B_KAN423-24_4.tif:0010-0674	1.716	450.227	223	1006	197.644	108.898	0.316	772.637	29715	6.322	0.158	0.595	0.387786
550	ARL13B_KAN423-24_4.tif:0011-0689	1.144	577	140	1530	115.95	111.449	0.426	660.128	25388	3.38	0.296	0.615	0.331318
551	ARL13B_KAN423-24_4.tif:0012-0698	2.314	754.045	67	2554	105.044	112.635	0.408	1744.96	67110	4.262	0.235	0.754	0.875798
552	ARL13B_KAN423-24_4.tif:0013-0882	3.51	867.815	220	2625	155.368	142.351	0.511	3046.21	117155	3.731	0.268	0.771	1.5289
553	ARL13B_KAN423-24_4.tif:0014-0904	1.3	273.66	171	404	61.333	145.818	0.531	355.779	13683	3.114	0.321	0.775	0.178566
554	ARL13B_KAN423-24_4.tif:0015-0982	1.248	394.75	120	669	19.001	158.391	0.355	492.678	18948	4.787	0.209	0.701	0.247275
555	ARL13B_KAN423-24_5.tif:0001-0140	1.82	756.614	220	1584	148.334	22.508	0.59	1377.12	52963	3.156	0.317	0.809	0.691177
556	ARL13B_KAN423-24_5.tif:0002-0156	2.366	661.516	50	2367	213.572	25.223	0.484	1565.24	60198	3.686	0.271	0.714	0.785596
557	ARL13B_KAN423-24_5.tif:0003-0164	1.118	524.186	220	1048	158.964	26.578	0.515	586.075	22540	3.958	0.253	0.761	0.294151
558	ARL13B_KAN423-24_5.tif:0004-0219	2.002	551.688	226	1998	41.457	35.378	0.349	1104.55	42480	6.671	0.15	0.678	0.554372
559	ARL13B_KAN423-24_5.tif:0005-0257	2.47	885.116	227	2557	89.586	41.388	0.551	2186.37	84086	3.763	0.266	0.815	1.09734
560	ARL13B_KAN423-24_5.tif:0006-0476	2.314	712.045	221	2449	151.781	76.93	0.407	1647.77	63372	5.4	0.185	0.706	0.827017
561	ARL13B_KAN423-24_5.tif:0007-0476	1.404	781.796	223	1659	188.044	76.83	0.566	1097.71	42217	3.134	0.319	0.806	0.55094
562	ARL13B_KAN423-24_5.tif:0008-0562	3.094	818.782	194	2322	195.673	90.57	0.301	2533.46	97435	7.499	0.133	0.684	1.27155
563	ARL13B_KAN423-24_5.tif:0009-0647	1.508	298.241	200	455	74.35	104.343	0.543	449.775	17298	2.954	0.339	0.695	0.225742
564	ARL13B_KAN423-24_5.tif:0010-0698	1.248	557.958	224	1046	222.495	112.647	0.539	696.374	26782	3.583	0.279	0.744	0.34951
565	ARL13B_KAN423-24_5.tif:0011-0709	2.21	658.141	186	1807	146.659	114.477	0.321	1454.58	55942	5.486	0.182	0.614	0.730054
566	ARL13B_KAN423-24_5.tif:0012-0798	0.52	336.3	259	430	219.558	128.694	0.524	174.887	6726	4.294	0.233	0.8	0.0877756
567	ARL13B_KAN423-24_5.tif:0013-0812	2.86	1001.14	222	2941	31.212	130.914	0.471	2863.45	110126	4.164	0.24	0.701	1.43717
568	ARL13B_KAN423-24_5.tif:0014-0907	2.314	449.225	85	907	15.611	146.17	0.325	1039.57	39981	5.142	0.194	0.654	0.52176
569	ARL13B_KAN423-24_5.tif:0015-0918	2.132	525.829	190	1321	193.962	147.957	0.249	1121.14	43118	8.323	0.12	0.577	0.562698
570	ARL13B_KAN423-24_5.tif:0016-0946	1.742	432.657	167	926	42.667	152.532	0.321	753.733	28988	6.585	0.152	0.713	0.378299
571	ARL13B_KAN423-24_5.tif:0017-0989	1.534	834.644	220	2149	128.212	159.382	0.582	1280.42	49244	3.233	0.309	0.776	0.642644
572	ARL13B_KAN423-24_6.tif:0001-0021	2.86	905.027	76	2437	137.649	3.37	0.431	2588.53	99553	4.402	0.227	0.812	1.29919
573	ARL13B_KAN423-24_6.tif:0002-0055	2.314	1024.36	220	2513	107.517	8.795	0.509	2370.51	91168	3.857	0.259	0.795	1.18976
574	ARL13B_KAN423-24_6.tif:0003-0131	2.574	461.444	100	1185	191.512	21.123	0.374	1187.83	45683	5.455	0.183	0.69	0.596172
575	ARL13B_KAN423-24_6.tif:0004-0254	1.898	575.959	224	1458	198.111	41.149	0.323	1093.24	42045	4.739	0.211	0.545	0.548695
576	ARL13B_KAN423-24_6.tif:0005-0368	1.924	782.014	195	1812	145.347	59.255	0.492	1504.68	57869	3.543	0.282	0.705	0.755202
577	ARL13B_KAN423-24_6.tif:0006-0383	3.146	1124.97	221	3061	2.782	61.711	0.362	3539.39	136122	5.951	0.168	0.756	1.77642
578	ARL13B_KAN423-24_6.tif:0007-0393	1.066	402.756	208	962	214.936	63.342	0.567	429.364	16513	3.208	0.312	0.804	0.215498
579	ARL13B_KAN423-24_6.tif:0008-0470	2.158	577.928	223	1456	41.106	75.88	0.345	1247.24	47968	5.946	0.168	0.629	0.625992
580	ARL13B_KAN423-24_6.tif:0009-0584	1.56	759.767	230	2053	156.8	94.17	0.446	1185.31	45586	4.071	0.246	0.682	0.594906
581	ARL13B_KAN423-24_6.tif:0010-0614	2.158	520.446	107	1022	16.027	98.909	0.219	1123.19	43197	8.708	0.115	0.601	0.563729
582	ARL13B_KAN423-24_6.tif:0011-0623	2.756	680.17	163	2036	213.775	100.571	0.389	1874.66	72098	4.683	0.214	0.656	0.940893
583	ARL13B_KAN423-24_6.tif:0012-0688	2.288	313.818	110	654	177.676	110.828	0.375	718.059	27616	4.411	0.227	0.672	0.360394
										53383.4				0.696664
584	ARL13B_KAN423-25_1.tif:0001-0029	0.884	305.029	225	454	63.423	4.491	0.553	269.662	10371	3.072	0.326	0.731	0.135344
585	ARL13B_KAN423-25_1.tif:0002-0124	4.212	654.068	220	1562	213.014	20.159	0.352	2755.1	105959	5.395	0.185	0.671	1.38279
586	ARL13B_KAN423-25_1.tif:0003-0193	1.066	408	223	676	170.844	31.206	0.382	434.954	16728	5.47	0.183	0.695	0.218304
587	ARL13B_KAN423-25_1.tif:0004-0231	3.276	704.095	226	1982	136.149	37.3	0.528	2306.76	88716	3.927	0.255	0.84	1.15776
588	ARL13B_KAN423-25_1.tif:0005-0355	2.704	572.846	222	1456	113.019	57.024	0.418	1549.07	59576	4.555	0.22	0.77	0.777478
589	ARL13B_KAN423-25_1.tif:0006-0370	2.912	516.473	209	1170	152.891	59.675	0.334	1504.06	57845	6.593	0.152	0.73	0.754888
590	ARL13B_KAN423-25_1.tif:0007-0417	1.248	378.646	165	682	214.14	67.396	0.447	472.578	18175	4.752	0.21	0.814	0.237187
591	ARL13B_KAN423-25_1.tif:0008-0508	2.028	778.218	161	1992	46.097	82.095	0.482	1578.32	60701	3.322	0.301	0.703	0.79216
592	ARL13B_KAN423-25_1.tif:0009-0528	3.042	606.974	221	1638	211.766	85.079	0.472	1846.53	71016	4.376	0.229	0.775	0.926773
593	ARL13B_KAN423-25_1.tif:0010-0568	2.964	625.614	81	1794	194.565	91.797	0.492	1854.43	71320	3.386	0.295	0.74	0.93074
594	ARL13B_KAN423-25_1.tif:0011-0648	4.212	666.432	220	1927	104.538	104.611	0.426	2807.18	107962	5.227	0.191	0.812	1.40892
595	ARL13B_KAN423-25_1.tif:0012-0648	2.964	444.465	222	1016	16.513	104.547	0.329	1317.47	50669	6.309	0.159	0.75	0.66124
596	ARL13B_KAN423-25_1.tif:0013-0718	3.328	583.555	222	1679	179.592	115.663	0.254	1942.19	74695	6.585	0.152	0.58	0.974784
597	ARL13B_KAN423-25_1.tif:0014-0724	3.926	657.967	187	1539	145.138	116.787	0.504	2583.33	99353	3.544	0.282	0.776	1.29658
598	ARL13B_KAN423-25_1.tif:0015-0737	2.496	558.594	230	1296	198.341	118.908	0.482	1394.33	53625	3.915	0.255	0.777	0.699817
599	ARL13B_KAN423-25_1.tif:0016-0744	2.236	421.151	96	827	144.176	120.161	0.215	941.751	36219	7.426	0.135	0.546	0.472665
600	ARL13B_KAN423-25_1.tif:0017-0788	3.952	880.461	87	2994	113.883	126.981	0.478	3479.79	133830	3.754	0.266	0.779	1.74651
601	ARL13B_KAN423-25_1.tif:0018-0796	4.446	587.339	161	1771	54.531	128.452	0.271	2611.47	100435	8.894	0.112	0.784	1.3107
602	ARL13B_KAN423-25_1.tif:0019-0826	4.29	853.018	222	2262	137.618	133.165	0.274	3659.67	140748	7.802	0.128	0.71	1.83679
603	ARL13B_KAN423-25_1.tif:0020-0833	4.55	431.034	223	735	127.263	134.041	0.504	1961.32	75431	3.299	0.303	0.763	0.984389
604	ARL13B_KAN423-25_1.tif:0021-0890	0.988	337.789	227	507	27.162	143.631	0.385	333.756	12836	5.689	0.176	0.685	0.167512
605	ARL13B_KAN423-25_1.tif:0022-0944	1.95	755.253	224	1652	151.868	152.286	0.581	1472.83	56644	2.542	0.393	0.743	0.739215
606	ARL13B_KAN423-25_1.tif:0023-1000	2.496	600.958	225	1444	163.716	161.487	0.307	1500.08	57692	6.756	0.148	0.63	0.752892
607	ARL13B_KAN423-25_2.tif:0001-0010	1.404	596.926	227	1334	132.798	1.618	0.496	838.134	32234	3.826	0.261	0.771	0.42066
608	ARL13B_KAN423-25_2.tif:0002-0074	0.754	317.586	222	434	42.367	11.985	0.548	239.474	9210	3.658	0.273	0.744	0.120192
609	ARL13B_KAN423-25_2.tif:0003-0117	2.366	387.275	136	971	148.066	18.908	0.25	916.347	35242	7.717	0.13	0.603	0.459915
610	ARL13B_KAN423-25_2.tif:0004-0146	1.846	317.549	187	550	98.173	23.605	0.517	586.231	22546	3.824	0.261	0.83	0.29423
611	ARL13B_KAN423-25_2.tif:0005-0192	2.678	708.311	128	1800	95.414	30.948	0.478	1896.97	72956	4.018	0.249	0.774	0.95209
612	ARL13B_KAN423-25_2.tif:0006-0344	1.378	452.698	224	997	87.728	55.499	0.343	623.856	23993	5.837	0.171	0.631	0.313113
613	ARL13B_KAN423-25_2.tif:0007-0375	1.95	666.36	201	1539	171.502	60.506	0.371	1299.48	49977	5.838	0.171	0.769	0.65221
614	ARL13B_KAN423-25_2.tif:0008-0394	2.938	569.973	77	1452	42.507	63.774	0.322	1674.68	64407	3.572	0.28	0.546	0.840524
615	ARL13B_KAN423-25_2.tif:0009-0408	1.95	470.92	220	1021	131.753	65.735	0.317	918.349	35319	5.994	0.167	0.605	0.46092
616	ARL13B_KAN423-25_2.tif:0010-0409	1.534	555.085	221	1061	109.548	65.923	0.485	851.551	32750	4.313	0.232	0.738	0.427394
617	ARL13B_KAN423-25_2.tif:0011-0511	1.768	516.735	160	1278	8.352	82.548	0.318	913.643	35138	6.139	0.163	0.624	0.458558
618	ARL13B_KAN423-25_2.tif:0012-0504	2.184	714.071	160	2431	202.588	81.295	0.581	1559.63	59982	2.805	0.357	0.781	0.782777
619	ARL13B_KAN423-25_2.tif:0013-0516	3.042	877.607	229	1781	191.579	83.186	0.364	2669.84	102680	4.063	0.246	0.617	1.33999
620	ARL13B_KAN423-25_2.tif:0014-0555	2.678	445.563	165	1038	215.645	89.603	0.28	1193.29	45893	4.88	0.205	0.531	0.598913
621	ARL13B_KAN423-25_2.tif:0015-0559	0.78	382.633	228	706	75.384	90.203	0.488	298.472	11479	3.963	0.252	0.674	0.149803
622	ARL13B_KAN423-25_2.tif:0016-0578	3.666	631.05	181	2144	40.218	93.306	0.522	2313.57	88978	2.97	0.337	0.786	1.16118
623	ARL13B_KAN423-25_2.tif:0017-0670	2.21	903.529	227	2832	87.224	108.037	0.597	1996.92	76800	2.898	0.345	0.752	1.00225
624	ARL13B_KAN423-25_2.tif:0018-0725	2.002	521.844	152	1212	218.798	116.899	0.388	1044.8	40182	5.53	0.181	0.706	0.524383
625	ARL13B_KAN423-25_2.tif:0019-0755	2.938	356.372	218	808	198.241	121.859	0.397	1047.08	40270	5.017	0.199	0.734	0.525531
626	ARL13B_KAN423-25_2.tif:0020-0802	1.196	358.261	211	698	176.86	129.501	0.506	428.506	16480	3.771	0.265	0.724	0.215067
627	ARL13B_KAN423-25_2.tif:0021-0815	1.872	660.708	223	1841	122.378	131.443	0.474	1236.92	47571	4.041	0.247	0.686	0.620811
628	ARL13B_KAN423-25_2.tif:0022-0837	2.496	475.74	174	1360	60.991	135.065	0.3	1187.52	45671	7.298	0.137	0.686	0.596015
629	ARL13B_KAN423-25_2.tif:0023-0922	2.548	1001.28	224	3035	185.702	148.878	0.508	2551.4	98125	3.793	0.264	0.8	1.28055
630	ARL13B_KAN423-25_3.tif:0001-0026	2.73	717.952	217	1860	204.269	4.313	0.328	1960.13	75385	6.395	0.156	0.719	0.983789
631	ARL13B_KAN423-25_3.tif:0002-0049	3.094	571.866	107	1263	4.284	7.734	0.373	1769.46	68052	4.812	0.208	0.702	0.888092
632	ARL13B_KAN423-25_3.tif:0003-0190	3.614	751.029	33	2709	98.229	30.499	0.296	2714.38	104393	4.258	0.235	0.563	1.36235
633	ARL13B_KAN423-25_3.tif:0004-0334	5.538	554.765	188	1491	98.72	53.819	0.367	3072.47	118165	6.334	0.158	0.829	1.54208
634	ARL13B_KAN423-25_3.tif:0005-0334	1.248	256.167	183	354	172.658	53.898	0.302	319.715	12296	7.109	0.141	0.686	0.160465
635	ARL13B_KAN423-25_3.tif:0006-0375	2.652	285.667	183	420	43.607	60.747	0.264	757.634	29138	7.101	0.141	0.559	0.380257
636	ARL13B_KAN423-25_3.tif:0007-0368	2.99	730.287	224	2565	133.671	59.332	0.203	2183.69	83983	10.392	0.096	0.613	1.09599
637	ARL13B_KAN423-25_3.tif:0008-0370	2.99	531.948	227	1137	83.527	59.491	0.275	1590.62	61174	3.9	0.256	0.5	0.798333
638	ARL13B_KAN423-25_3.tif:0009-0483	3.458	388	202	779	65.965	78.334	0.375	1341.79	51604	4.23	0.236	0.673	0.673442
639	ARL13B_KAN423-25_3.tif:0010-0491	4.082	532.58	169	1184	142.066	79.323	0.407	2174.12	83615	3.11	0.322	0.674	1.09119
640	ARL13B_KAN423-25_3.tif:0011-0528	1.846	726.718	202	2107	174.396	85.214	0.46	1341.6	51597	4.537	0.22	0.74	0.673351
641	ARL13B_KAN423-25_3.tif:0012-0529	1.794	301.652	103	551	60.634	85.272	0.355	541.197	20814	4.381	0.228	0.711	0.271627
642	ARL13B_KAN423-25_3.tif:0013-0530	4.81	520.562	156	923	203.786	85.588	0.504	2504.05	96304	3.355	0.298	0.777	1.25679
643	ARL13B_KAN423-25_3.tif:0014-0612	3.146	397.868	219	1272	25.971	98.666	0.359	1251.77	48142	5.587	0.179	0.686	0.628262
644	ARL13B_KAN423-25_3.tif:0015-0677	3.874	558.819	222	1200	45.965	109.27	0.354	2164.99	83264	3.856	0.259	0.634	1.08661
645	ARL13B_KAN423-25_3.tif:0016-0690	2.678	1151.27	220	3186	112.528	111.147	0.502	3083.29	118581	4.032	0.248	0.744	1.5475
646	ARL13B_KAN423-25_3.tif:0017-0701	2.496	314.562	185	556	30.572	112.991	0.32	785.195	30198	6.095	0.164	0.674	0.39409
647	ARL13B_KAN423-25_3.tif:0018-0725	3.484	637.09	224	1654	172.676	117.084	0.404	2219.75	85370	5.161	0.194	0.768	1.1141
648	ARL13B_KAN423-25_3.tif:0019-0740	1.638	861.159	222	2477	179.529	119.267	0.582	1410.66	54253	3.027	0.33	0.741	0.708012
649	ARL13B_KAN423-25_3.tif:0020-0854	4.862	422.021	175	988	134.772	137.925	0.492	2051.99	78918	3.514	0.285	0.763	1.0299
650	ARL13B_KAN423-25_3.tif:0021-0890	4.914	648.132	224	1192	205.266	143.452	0.465	3185.11	122497	4.481	0.223	0.816	1.59861
651	ARL13B_KAN423-25_3.tif:0022-0928	4.654	834.073	223	2525	13.907	149.577	0.442	3882.01	149299	3.896	0.257	0.726	1.94838
652	ARL13B_KAN423-25_3.tif:0023-0965	2.522	394.082	158	854	83.339	155.812	0.359	993.936	38226	3.973	0.252	0.653	0.498857
653	ARL13B_KAN423-25_3.tif:0024-0959	2.652	433.059	222	743	154.887	154.689	0.572	1148.54	44172	3.374	0.296	0.843	0.576453
654	ARL13B_KAN423-25_3.tif:0025-0974	1.196	278.435	218	365	38.686	157.036	0.454	333.028	12808	4.457	0.224	0.742	0.167147
655	ARL13B_KAN423-25_3.tif:0026-0996	3.51	861.148	229	2201	98.086	160.26	0.393	3022.81	116255	3.459	0.289	0.638	1.51715
656	ARL13B_KAN423-25_3.tif:0027-0998	4.238	392.153	227	957	129.367	161.102	0.342	1662.05	63921	6.362	0.157	0.695	0.834181
657	ARL13B_KAN423-25_3.tif:0028-1009	2.314	963.618	223	2340	218.535	162.776	0.57	2229.95	85762	3.332	0.3	0.788	1.11921
658	ARL13B_KAN423-25_4.tif:0001-0005	0.52	652.1	235	1245	161.573	0.726	0.599	339.112	13042	2.402	0.416	0.87	0.170201
659	ARL13B_KAN423-25_4.tif:0002-0077	3.354	922.496	224	2620	48.266	12.504	0.376	3094.24	119002	5.316	0.188	0.707	1.553
660	ARL13B_KAN423-25_4.tif:0003-0084	2.366	590.11	239	1322	193.405	13.541	0.287	1396.28	53700	7.263	0.138	0.636	0.700795
661	ARL13B_KAN423-25_4.tif:0004-0103	2.418	714.14	227	1775	126.43	16.573	0.48	1726.89	66415	3.997	0.25	0.713	0.866729
662	ARL13B_KAN423-25_4.tif:0005-0170	3.458	647.632	183	1745	106.537	27.392	0.235	2239.64	86135	10.176	0.098	0.682	1.12408
663	ARL13B_KAN423-25_4.tif:0006-0212	3.146	703.14	220	2168	41.177	34.155	0.384	2212.21	85080	5.933	0.169	0.72	1.11031
664	ARL13B_KAN423-25_4.tif:0007-0288	1.222	455.617	222	905	106.06	46.538	0.486	556.798	21414	4.08	0.245	0.746	0.279457
665	ARL13B_KAN423-25_4.tif:0008-0365	3.068	358.051	151	783	41.07	58.43	0.147	1098.57	42250	3.651	0.274	0.346	0.551371
666	ARL13B_KAN423-25_4.tif:0009-0386	1.586	493.18	232	1232	79.709	62.352	0.406	782.231	30084	5.151	0.194	0.701	0.392602
667	ARL13B_KAN423-25_4.tif:0010-0399	4.264	1043.95	0	2764	136.967	64.112	0.303	4451.68	171208	5.774	0.173	0.679	2.2343
668	ARL13B_KAN423-25_4.tif:0011-0402	0.988	384.237	226	617	2.19	64.924	0.593	379.649	14601	3.281	0.305	0.792	0.190546
669	ARL13B_KAN423-25_4.tif:0012-0498	1.586	760.525	229	1764	177.442	80.338	0.514	1206.27	46392	3.844	0.26	0.744	0.605425
670	ARL13B_KAN423-25_4.tif:0013-0527	2.912	868.554	227	2337	158.455	85.314	0.377	2529.38	97278	3.618	0.276	0.64	1.2695
671	ARL13B_KAN423-25_4.tif:0014-0587	3.458	544.489	147	1698	41.835	94.791	0.24	1882.95	72417	8.561	0.117	0.635	0.945056
672	ARL13B_KAN423-25_4.tif:0015-0716	3.978	809.196	98	2483	99.258	115.462	0.338	3219.18	123807	6.575	0.152	0.71	1.61571
673	ARL13B_KAN423-25_4.tif:0016-0719	2.132	417.963	220	705	7.667	115.888	0.502	891.152	34273	4.334	0.231	0.906	0.447269
674	ARL13B_KAN423-25_4.tif:0017-0749	3.198	378.366	216	631	20.289	120.78	0.573	1210.09	46539	3.014	0.332	0.807	0.607343
675	ARL13B_KAN423-25_4.tif:0018-0840	3.224	530.742	115	1139	182.33	135.68	0.37	1711.21	65812	4.527	0.221	0.705	0.858859
676	ARL13B_KAN423-25_4.tif:0019-0863	4.342	495.473	163	1363	137.045	138.998	0.459	2151.47	82744	3.969	0.252	0.709	1.07983
677	ARL13B_KAN423-25_4.tif:0020-0939	2.73	368.981	220	608	13.299	151.307	0.266	1007.38	38743	7.21	0.139	0.693	0.505604
678	ARL13B_KAN423-25_4.tif:0021-0963	3.406	353.962	216	815	186.641	155.196	0.353	1205.67	46369	5.277	0.19	0.693	0.605124
679	ARL13B_KAN423-25_4.tif:0022-1019	2.288	382.193	230	636	20.836	164.578	0.332	874.511	33633	5.486	0.182	0.727	0.438917
680	ARL13B_KAN423-25_4.tif:0023-1021	1.482	449.158	222	979	222.057	164.74	0.268	665.692	25602	6.829	0.146	0.553	0.334111
681	ARL13B_KAN423-25_5.tif:0001-0009	2.132	275.634	206	388	172.697	1.479	0.488	587.687	22602	3.776	0.265	0.788	0.29496
682	ARL13B_KAN423-25_5.tif:0002-0051	1.482	623.789	197	1347	170.363	8.296	0.508	924.512	35556	4.135	0.242	0.82	0.464013
683	ARL13B_KAN423-25_5.tif:0003-0229	2.444	448.426	110	1122	144.943	37.005	0.304	1096.02	42152	6.524	0.153	0.629	0.550092
684	ARL13B_KAN423-25_5.tif:0004-0339	1.56	375.333	154	701	183.683	54.755	0.338	585.555	22520	4.592	0.218	0.678	0.29389
685	ARL13B_KAN423-25_5.tif:0005-0383	2.522	694.68	26	1886	152.467	61.829	0.469	1752.09	67384	4.877	0.205	0.886	0.879374
686	ARL13B_KAN423-25_5.tif:0006-0418	2.678	667.825	163	1632	2.348	67.569	0.377	1788.54	68786	4.287	0.233	0.66	0.897671
687	ARL13B_KAN423-25_5.tif:0007-0437	4.602	1180.06	122	3069	199.741	70.339	0.351	5430.97	208871	5.635	0.177	0.744	2.72581
688	ARL13B_KAN423-25_5.tif:0008-0470	0.858	234.788	184	290	129.071	75.57	0.351	201.46	7748	2.791	0.358	0.564	0.101113
689	ARL13B_KAN423-25_5.tif:0009-0534	3.718	866.217	222	2030	116.845	86.205	0.334	3220.79	123869	6.628	0.151	0.691	1.61651
690	ARL13B_KAN423-25_5.tif:0010-0586	4.29	933.109	136	2258	141.119	94.416	0.296	4003.28	153963	7.661	0.131	0.748	2.00925
691	ARL13B_KAN423-25_5.tif:0011-0670	4.602	437.401	98	1021	64.853	107.949	0.31	2013.04	77420	5.454	0.183	0.65	1.01035
692	ARL13B_KAN423-25_5.tif:0012-0678	3.432	1138.23	224	2591	130.593	109.499	0.398	3906.66	150247	4.309	0.232	0.697	1.96075
693	ARL13B_KAN423-25_5.tif:0013-0817	1.846	317.93	0	691	29.76	131.854	0.293	586.933	22573	2.877	0.348	0.514	0.294582
694	ARL13B_KAN423-25_5.tif:0014-0823	2.002	677.065	223	1769	130.335	132.892	0.34	1355.57	52134	5.949	0.168	0.667	0.680359
695	ARL13B_KAN423-25_5.tif:0015-0826	2.73	1441.21	205	3830	109.193	133.103	0.545	3934.74	151327	3.482	0.287	0.792	1.97485
696	ARL13B_KAN423-25_5.tif:0016-0868	2.08	663.45	112	1507	205.116	140.048	0.477	1380.06	53076	5.145	0.194	0.976	0.692652
697	ARL13B_KAN423-25_5.tif:0017-0982	1.352	448.346	223	1089	64.844	158.403	0.376	606.201	23314	5.572	0.179	0.65	0.304252
698	ARL13B_KAN423-25_5.tif:0018-1023	1.612	565.113	236	1155	145.133	165.094	0.309	911.017	35037	7.24	0.138	0.681	0.45724
699	ARL13B_KAN423-25_6.tif:0001-0009	0.754	382.034	220	632	56.251	1.471	0.537	288.071	11079	3.483	0.287	0.699	0.144583
700	ARL13B_KAN423-25_6.tif:0002-0050	1.196	594.174	222	1501	87.787	8.063	0.499	710.675	27332	3.815	0.262	0.676	0.356688
701	ARL13B_KAN423-25_6.tif:0003-0134	1.768	608.868	185	1393	11.615	21.733	0.53	1076.54	41403	3.559	0.281	0.777	0.540317
702	ARL13B_KAN423-25_6.tif:0004-0260	2.652	790.412	228	2155	198.859	42.004	0.435	2096.3	80622	4.337	0.231	0.708	1.05213
703	ARL13B_KAN423-25_6.tif:0005-0256	4.03	885.8	84	3336	143.279	41.345	0.29	3569.99	137299	6.894	0.145	0.76	1.79178
704	ARL13B_KAN423-25_6.tif:0006-0283	0.728	263.214	123	495	19.333	45.697	0.288	191.632	7370	4.442	0.225	0.544	0.0961799
705	ARL13B_KAN423-25_6.tif:0007-0344	3.276	727.643	222	1757	216.748	55.4	0.331	2383.9	91683	6.218	0.161	0.676	1.19648
706	ARL13B_KAN423-25_6.tif:0008-0384	2.002	492.26	220	1500	44.659	61.888	0.323	985.563	37904	5.848	0.171	0.644	0.494655
707	ARL13B_KAN423-25_6.tif:0009-0389	3.458	765.917	172	1864	88.437	62.844	0.517	2648.7	101867	3.921	0.255	0.831	1.32938
708	ARL13B_KAN423-25_6.tif:0010-0407	2.47	526.484	223	1131	195.122	65.477	0.208	1300.49	50016	8.643	0.116	0.523	0.652718
709	ARL13B_KAN423-25_6.tif:0011-0480	0.52	320.5	236	415	197.346	77.352	0.572	166.67	6410	3.71	0.27	0.727	0.0836517
710	ARL13B_KAN423-25_6.tif:0012-0607	2.808	649.083	167	2010	36.443	97.87	0.285	1822.74	70101	8.534	0.117	0.753	0.914832
711	ARL13B_KAN423-25_6.tif:0013-0634	3.302	674.283	78	1724	69.732	102.252	0.483	2226.62	85634	3.337	0.3	0.758	1.11754
712	ARL13B_KAN423-25_6.tif:0014-0792	3.042	880.393	220	2080	82.801	127.671	0.464	2678.32	103006	4.729	0.211	0.81	1.34425
713	ARL13B_KAN423-25_6.tif:0015-0817	3.016	465.5	139	1246	129.651	131.615	0.337	1404.03	53998	6.799	0.147	0.786	0.704684
714	ARL13B_KAN423-25_6.tif:0016-0919	1.69	318.4	222	477	20.512	148.423	0.234	538.128	20696	7.929	0.126	0.594	0.270087
715	ARL13B_KAN423-25_6.tif:0017-0944	1.482	362.263	225	759	112.537	152.241	0.275	536.906	20649	7.623	0.131	0.551	0.269473
716	ARL13B_KAN423-25_6.tif:0018-1020	1.612	518.581	221	999	30.18	164.54	0.441	836.002	32152	4.798	0.208	0.785	0.41959
										62789.1				0.81941
717	ARL13B_KAN423-26_1.tif:0001-0066	1.17	556.289	127	1317	187.306	10.763	0.539	650.897	25033	3.291	0.304	0.756	0.326685
718	ARL13B_KAN423-26_1.tif:0002-0161	2.132	542.207	237	1232	186.472	26.136	0.236	1156.06	44461	8.472	0.118	0.592	0.580225
719	ARL13B_KAN423-26_1.tif:0003-0494	1.56	711.583	222	2024	110.846	79.824	0.544	1110.14	42695	3.122	0.32	0.698	0.557178
720	ARL13B_KAN423-26_1.tif:0004-0564	0.936	310.583	222	492	186.289	90.981	0.501	290.724	11181	4.223	0.237	0.75	0.145914
721	ARL13B_KAN423-26_1.tif:0005-0759	2.99	508.687	221	1113	112.004	122.454	0.558	1521.07	58499	3.405	0.294	0.855	0.763423
722	ARL13B_KAN423-26_1.tif:0006-0800	2.964	621.07	223	1307	205.846	128.919	0.574	1840.96	70802	3.459	0.289	0.829	0.92398
723	ARL13B_KAN423-26_2.tif:0001-0080	1.976	666.934	152	1836	99.608	12.821	0.532	1317.94	50687	3.61	0.277	0.809	0.661475
724	ARL13B_KAN423-26_2.tif:0002-0318	3.562	994.153	131	2763	96.487	51.21	0.463	3541.39	136199	5.043	0.198	0.916	1.77742
725	ARL13B_KAN423-26_2.tif:0003-0440	2.6	566.4	94	1290	101.207	71.003	0.495	1472.73	56640	4.432	0.226	0.823	0.739163
726	ARL13B_KAN423-26_2.tif:0004-0502	2.262	595.77	219	1910	24.309	80.965	0.327	1347.71	51832	6.586	0.152	0.722	0.676418
727	ARL13B_KAN423-26_2.tif:0005-0694	2.262	491.632	54	1117	10.769	111.897	0.348	1112.14	42772	4.658	0.215	0.659	0.558183
728	ARL13B_KAN423-26_2.tif:0006-0765	1.69	391.462	163	718	6.56	123.422	0.4	661.61	25445	4.864	0.206	0.688	0.332062
729	ARL13B_KAN423-26_2.tif:0007-0853	1.378	629.453	236	1505	195.309	137.724	0.513	867.438	33361	3.615	0.277	0.779	0.435367
730	ARL13B_KAN423-26_2.tif:0008-0881	1.378	572.981	231	1587	119.43	142.051	0.402	789.616	30368	5.521	0.181	0.779	0.396308
731	ARL13B_KAN423-26_3.tif:0001-0709	2.366	402.648	221	727	162.633	114.579	0.235	952.723	36641	6.578	0.152	0.545	0.478172
732	ARL13B_KAN423-26_3.tif:0002-0728	3.9	682.56	225	1665	88.482	117.457	0.384	2662.14	102384	5.564	0.18	0.752	1.33613
733	ARL13B_KAN423-26_3.tif:0003-0805	1.404	414.759	228	681	20.721	129.761	0.411	582.357	22397	5.15	0.194	0.777	0.292285
734	ARL13B_KAN423-26_3.tif:0004-0936	1.326	578.333	223	1231	119.349	151.033	0.585	766.916	29495	3.921	0.255	0.797	0.384915
735	ARL13B_KAN423-26_4.tif:0001-0137	3.094	536.748	221	1555	194.381	22.039	0.316	1660.8	63873	6.773	0.148	0.67	0.833555
736	ARL13B_KAN423-26_4.tif:0002-0159	3.406	578.985	205	1732	178.635	25.508	0.429	1972.14	75847	4.587	0.218	0.771	0.989818
737	ARL13B_KAN423-26_4.tif:0003-0236	1.066	280.976	156	538	214.386	38.124	0.488	299.538	11520	4.31	0.232	0.845	0.150338
738	ARL13B_KAN423-26_4.tif:0004-0271	2.08	284.113	165	467	26.346	43.848	0.303	590.99	22729	6.607	0.151	0.734	0.296618
739	ARL13B_KAN423-26_4.tif:0005-0299	2.652	671.225	222	1517	177.656	48.353	0.55	1780.2	68465	3.386	0.295	0.797	0.893481
740	ARL13B_KAN423-26_4.tif:0006-0434	1.222	323.234	224	523	60.457	70.022	0.486	395.016	15192	4.059	0.246	0.691	0.198259
741	ARL13B_KAN423-26_4.tif:0007-0492	2.34	769.989	223	1643	223.118	79.478	0.414	1801.88	69299	5.151	0.194	0.763	0.904365
742	ARL13B_KAN423-26_4.tif:0008-0561	2.366	414.604	226	707	52.675	90.308	0.411	981.013	37729	3.925	0.255	0.689	0.492371
743	ARL13B_KAN423-26_4.tif:0009-0651	2.184	811.679	51	2862	106.168	104.884	0.348	1772.81	68181	4.79	0.209	0.646	0.889775
744	ARL13B_KAN423-26_4.tif:0010-0699	1.118	356.233	220	605	18.729	112.678	0.473	398.292	15318	4.2	0.238	0.705	0.199903
745	ARL13B_KAN423-26_4.tif:0011-0915	0.598	300.043	224	466	70.091	147.491	0.368	179.437	6901	6.081	0.164	0.622	0.0900594
746	ARL13B_KAN423-26_4.tif:0012-0922	1.014	424.026	233	679	4.029	148.815	0.511	429.988	16537	3.856	0.259	0.75	0.215811
747	ARL13B_KAN423-26_4.tif:0013-0948	2.002	648.519	176	1257	180.905	152.874	0.403	1298.41	49936	5.386	0.186	0.73	0.651674
748	ARL13B_KAN423-26_4.tif:0014-0995	2.21	560.553	223	1640	122.043	160.657	0.293	1238.9	47647	7.201	0.139	0.612	0.621803
749	ARL13B_KAN423-26_5.tif:0001-0202	3.796	742.411	28	2229	170.641	32.734	0.307	2818.36	108392	6.274	0.159	0.652	1.41454
750	ARL13B_KAN423-26_5.tif:0002-0439	2.626	780.337	227	2619	52.787	70.901	0.383	2049.29	78814	5.249	0.191	0.65	1.02854
751	ARL13B_KAN423-26_5.tif:0003-0468	1.17	449.622	207	1058	174.718	75.632	0.339	526.09	20233	5.757	0.174	0.573	0.264045
752	ARL13B_KAN423-26_5.tif:0004-0910	2.522	753.649	222	1571	31.172	146.564	0.401	1900.82	73104	3.862	0.259	0.651	0.954021
753	ARL13B_KAN423-26_5.tif:0005-0936	2.132	405.744	180	714	207.244	150.997	0.258	865.098	33271	9.54	0.105	0.729	0.434193
754	ARL13B_KAN423-26_5.tif:0006-1003	1.17	557.467	220	1140	2.456	161.782	0.568	652.275	25086	3.703	0.27	0.818	0.327377
755	ARL13B_KAN423-26_6.tif:0001-0243	2.86	563.255	205	1173	130.243	39.137	0.383	1611.01	61958	5.301	0.189	0.756	0.808564
756	ARL13B_KAN423-26_6.tif:0002-0494	3.432	745.598	53	1915	136.917	80.001	0.345	2559.05	98419	3.452	0.29	0.587	1.28439
757	ARL13B_KAN423-26_6.tif:0003-0547	2.444	590.702	195	1592	191.851	88.205	0.56	1443.76	55526	2.869	0.349	0.72	0.724625
758	ARL13B_KAN423-26_6.tif:0004-0617	1.768	497.176	200	1051	91.922	99.46	0.403	879.061	33808	4.341	0.23	0.673	0.441201
759	ARL13B_KAN423-26_6.tif:0005-0626	2.782	552.336	101	1389	127.189	100.687	0.302	1536.69	59100	3.819	0.262	0.532	0.771266
760	ARL13B_KAN423-26_6.tif:0006-0702	1.664	593.344	155	1474	161.953	113.278	0.532	987.383	37974	3.365	0.297	0.727	0.495568
761	ARL13B_KAN423-26_6.tif:0007-0797	2.21	733.871	220	1652	110.719	128.468	0.481	1621.95	62379	4.112	0.243	0.756	0.814058
762	ARL13B_KAN423-26_6.tif:0008-0936	2.002	591.169	222	1278	162.409	150.979	0.504	1183.59	45520	4.215	0.237	0.798	0.594045
763	ARL13B_KAN423-26_6.tif:0009-0982	1.508	367.466	200	652	179.096	158.481	0.38	554.171	21313	4.464	0.224	0.678	0.278139
										47977.9				0.626121
764	ARL13B_KAN423-27_1.tif:0001-0027	2.34	921.178	230	2343	62.357	4.456	0.38	2155.69	82906	5.684	0.176	0.744	1.08194
765	ARL13B_KAN423-27_1.tif:0002-0164	4.108	360.975	220	678	108.886	26.448	0.362	1482.97	57034	5.993	0.167	0.794	0.744305
766	ARL13B_KAN423-27_1.tif:0003-0157	2.028	312.692	185	579	29.101	25.316	0.492	634.178	24390	3.677	0.272	0.788	0.318294
767	ARL13B_KAN423-27_1.tif:0004-0174	3.146	613.669	220	1228	220.804	28.078	0.536	1930.72	74254	3.827	0.261	0.766	0.969029
768	ARL13B_KAN423-27_1.tif:0005-0224	3.848	511.284	58	1188	190.655	36.073	0.435	1967.54	75670	2.386	0.419	0.661	0.987508
769	ARL13B_KAN423-27_1.tif:0006-0283	3.25	773.12	181	1799	49.547	45.669	0.342	2512.79	96640	6.089	0.164	0.762	1.26117
770	ARL13B_KAN423-27_1.tif:0007-0310	3.926	698.702	154	2075	216.487	50.036	0.504	2743.27	105504	4.104	0.244	0.825	1.37685
771	ARL13B_KAN423-27_1.tif:0008-0343	4.03	440.058	225	906	90.251	54.968	0.482	1773.54	68209	2.961	0.338	0.701	0.890141
772	ARL13B_KAN423-27_1.tif:0009-0397	3.718	413.203	81	1406	138.426	64.069	0.385	1536.38	59088	5.474	0.183	0.747	0.77111
773	ARL13B_KAN423-27_1.tif:0010-0427	2.444	399.223	194	972	112.837	68.741	0.392	975.761	37527	4.933	0.203	0.77	0.489735
774	ARL13B_KAN423-27_1.tif:0011-0517	3.744	549.333	28	1966	161.724	83.361	0.566	2056.83	79104	2.503	0.399	0.722	1.03232
775	ARL13B_KAN423-27_1.tif:0012-0521	2.314	633.674	66	1894	142.676	84.182	0.533	1466.41	56397	3.76	0.266	0.813	0.735992
776	ARL13B_KAN423-27_1.tif:0013-0544	2.496	406.062	81	1109	208.747	87.757	0.385	1013.59	38982	3.571	0.28	0.623	0.508723
777	ARL13B_KAN423-27_1.tif:0014-0564	1.82	318.757	209	500	65.762	90.901	0.527	580.173	22313	3.336	0.3	0.749	0.291189
778	ARL13B_KAN423-27_1.tif:0015-0638	3.042	475.59	133	1173	112.408	102.641	0.209	1446.83	55644	7.117	0.141	0.552	0.726165
779	ARL13B_KAN423-27_1.tif:0016-0657	3.016	584.638	166	1484	171.869	105.975	0.58	1763.37	67818	3.666	0.273	0.951	0.885038
780	ARL13B_KAN423-27_1.tif:0017-0694	2.106	852.778	226	2063	158.952	111.781	0.599	1796.06	69075	2.591	0.386	0.783	0.901442
781	ARL13B_KAN423-27_1.tif:0018-0696	3.536	1158.25	220	3399	210.665	112.225	0.413	4095.82	157522	5.042	0.198	0.741	2.05569
782	ARL13B_KAN423-27_1.tif:0019-0702	2.99	410.748	182	1022	82.861	113.507	0.363	1228.21	47236	3.792	0.264	0.635	0.616439
783	ARL13B_KAN423-27_1.tif:0020-0757	1.014	331.205	218	582	50.804	122.081	0.534	335.862	12917	4.01	0.249	0.772	0.168569
784	ARL13B_KAN423-27_1.tif:0021-0803	2.184	704.607	220	2357	133.248	129.595	0.453	1538.95	59187	3.708	0.27	0.715	0.772402
785	ARL13B_KAN423-27_1.tif:0022-0879	3.536	900.581	220	2229	30.289	141.927	0.461	3184.65	122479	3.288	0.304	0.731	1.59837
786	ARL13B_KAN423-27_1.tif:0023-0926	2.73	516.59	220	1157	181.786	149.427	0.205	1410.38	54242	11.088	0.09	0.565	0.707869
787	ARL13B_KAN423-27_1.tif:0024-0931	1.794	695.159	224	1485	54.155	150.265	0.477	1247.19	47966	4.075	0.245	0.762	0.625966
788	ARL13B_KAN423-27_1.tif:0025-0943	2.496	653.865	224	1319	79.422	152.225	0.52	1632.14	62771	3.643	0.274	0.75	0.819174
789	ARL13B_KAN423-27_1.tif:0026-0954	2.574	320.091	174	493	110.545	153.996	0.324	823.964	31689	5.288	0.189	0.656	0.413548
790	ARL13B_KAN423-27_1.tif:0027-0973	3.328	577.086	127	1491	157.647	156.856	0.476	1920.66	73867	4.894	0.204	0.911	0.963979
791	ARL13B_KAN423-27_2.tif:0001-0023	2.288	780.33	148	2342	220.566	3.705	0.452	1785.5	68669	4.423	0.226	0.721	0.896144
792	ARL13B_KAN423-27_2.tif:0002-0065	3.432	419.689	228	895	135.044	10.541	0.515	1440.46	55399	3.301	0.303	0.739	0.722968
793	ARL13B_KAN423-27_2.tif:0003-0090	4.316	775.398	223	1675	31.565	14.53	0.491	3346.82	128716	4.472	0.224	0.883	1.67977
794	ARL13B_KAN423-27_2.tif:0004-0100	1.69	379.862	223	559	140.653	16.154	0.364	642.005	24691	5.606	0.178	0.695	0.322222
795	ARL13B_KAN423-27_2.tif:0005-0119	5.382	450.217	204	1009	80.871	19.399	0.426	2423.22	93195	4.476	0.223	0.784	1.21621
796	ARL13B_KAN423-27_2.tif:0006-0128	3.016	490.155	220	1040	101.854	20.412	0.388	1478.4	56858	4.566	0.219	0.686	0.742008
797	ARL13B_KAN423-27_2.tif:0007-0141	3.276	920.603	220	3106	22.882	22.835	0.419	3016.08	115996	5.433	0.184	0.795	1.51377
798	ARL13B_KAN423-27_2.tif:0008-0201	2.964	627.649	220	2649	143.542	32.519	0.463	1860.46	71552	3.739	0.267	0.687	0.933767
799	ARL13B_KAN423-27_2.tif:0009-0221	2.808	696.685	231	1487	96.118	35.693	0.574	1956.41	75242	3.285	0.304	0.821	0.981923
800	ARL13B_KAN423-27_2.tif:0010-0235	2.704	712.048	155	2033	125.291	38.018	0.323	1925.49	74053	5.449	0.184	0.625	0.966406
801	ARL13B_KAN423-27_2.tif:0011-0246	2.756	960.198	225	2256	193.022	39.903	0.466	2646.47	101781	3.943	0.254	0.721	1.32826
802	ARL13B_KAN423-27_2.tif:0012-0266	3.198	802.829	220	2438	53.336	42.891	0.448	2567.6	98748	4.507	0.222	0.757	1.28868
803	ARL13B_KAN423-27_2.tif:0013-0303	4.576	1240.26	221	3039	150.045	48.796	0.382	5675.78	218286	5.102	0.196	0.755	2.84867
804	ARL13B_KAN423-27_2.tif:0014-0326	2.314	704.787	225	1780	207.147	52.563	0.35	1630.97	62726	5.381	0.186	0.667	0.818586
805	ARL13B_KAN423-27_2.tif:0015-0351	3.952	858.145	220	2930	66.208	56.59	0.445	3391.59	130438	4.781	0.209	0.754	1.70224
806	ARL13B_KAN423-27_2.tif:0016-0346	2.782	826.607	129	2447	109.211	55.728	0.46	2299.76	88447	3.987	0.251	0.748	1.15425
807	ARL13B_KAN423-27_2.tif:0017-0354	2.6	730.98	144	1710	89.263	56.923	0.521	1900.66	73098	2.675	0.374	0.694	0.953943
808	ARL13B_KAN423-27_2.tif:0018-0370	3.068	323.085	222	653	213.719	59.831	0.331	991.284	38124	5.691	0.176	0.623	0.497526
809	ARL13B_KAN423-27_2.tif:0019-0399	4.55	1228.92	220	3838	47.879	64.247	0.442	5591.92	215061	4.512	0.222	0.797	2.80659
810	ARL13B_KAN423-27_2.tif:0020-0468	3.25	1190.64	217	3780	101.673	75.645	0.434	3869.81	148830	4.422	0.226	0.733	1.94226
811	ARL13B_KAN423-27_2.tif:0021-0590	1.56	361.6	103	711	69.327	95.218	0.333	564.13	21696	6.956	0.144	0.741	0.283137
812	ARL13B_KAN423-27_2.tif:0022-0623	3.562	554.861	220	1022	156.461	100.466	0.555	1976.54	76016	3.35	0.299	0.823	0.992023
813	ARL13B_KAN423-27_2.tif:0023-0687	2.912	984.857	5	2672	100.369	111.126	0.333	2868.08	110304	4.384	0.228	0.657	1.43949
814	ARL13B_KAN423-27_2.tif:0024-0689	2.938	798.947	220	1919	39.262	111.106	0.417	2347.45	90281	5.468	0.183	0.819	1.17818
815	ARL13B_KAN423-27_2.tif:0025-0766	1.95	885.96	222	2072	180.728	123.529	0.473	1727.73	66447	4.142	0.241	0.789	0.867146
816	ARL13B_KAN423-27_2.tif:0026-0818	3.666	807.539	221	1978	146.681	131.757	0.24	2960.62	113863	8.451	0.118	0.571	1.48593
817	ARL13B_KAN423-27_2.tif:0027-0869	0.65	426.56	220	733	7.111	140.149	0.595	277.281	10664	2.901	0.345	0.769	0.139167
818	ARL13B_KAN423-27_2.tif:0028-0876	0.962	340.405	239	577	9.411	141.327	0.382	327.49	12595	5.586	0.179	0.692	0.164367
819	ARL13B_KAN423-27_2.tif:0029-1026	2.366	823.736	220	1683	42.932	165.559	0.488	1949.08	74960	4.55	0.22	0.816	0.978242
820	ARL13B_KAN423-27_3.tif:0001-0137	2.288	311.534	174	436	164.882	22.104	0.431	712.833	27415	4.291	0.233	0.752	0.357771
821	ARL13B_KAN423-27_3.tif:0002-0402	2.496	685.375	132	2265	118.517	64.749	0.498	1710.8	65796	4.019	0.249	0.765	0.858651
822	ARL13B_KAN423-27_3.tif:0003-0401	2.444	370.223	175	750	107.935	64.548	0.345	904.88	34801	5.693	0.176	0.699	0.45416
823	ARL13B_KAN423-27_3.tif:0004-0419	2.548	748.52	89	2560	58.371	67.559	0.511	1907.35	73355	3.412	0.293	0.723	0.957297
824	ARL13B_KAN423-27_3.tif:0005-0465	1.43	424.018	118	949	6.217	75.144	0.342	606.383	23321	5.733	0.174	0.696	0.304344
825	ARL13B_KAN423-27_3.tif:0006-0521	2.288	641.966	220	1902	23.053	84.154	0.363	1468.91	56493	5.684	0.176	0.669	0.737245
826	ARL13B_KAN423-27_3.tif:0007-0613	2.34	799	233	2703	119.106	98.866	0.443	1869.77	71910	3.115	0.321	0.61	0.938439
827	ARL13B_KAN423-27_3.tif:0008-0667	3.796	544.329	104	1466	29.228	107.52	0.477	2066.4	79472	3.808	0.263	0.793	1.03712
828	ARL13B_KAN423-27_3.tif:0009-0717	2.938	1289.86	157	3739	154.357	115.728	0.565	3789.83	145754	3.576	0.28	0.942	1.90212
829	ARL13B_KAN423-27_3.tif:0010-0729	3.406	409.031	176	1043	190.87	117.608	0.346	1393.24	53583	6.201	0.161	0.806	0.699269
830	ARL13B_KAN423-27_3.tif:0011-0734	2.34	640.033	221	1477	150.346	118.427	0.55	1497.77	57603	3.676	0.272	0.8	0.75173
831	ARL13B_KAN423-27_3.tif:0012-0772	3.016	494.448	206	1141	174.702	124.731	0.443	1491.35	57356	3.651	0.274	0.684	0.748507
832	ARL13B_KAN423-27_3.tif:0013-0799	2.444	331.521	205	776	56.244	128.688	0.349	810.287	31163	6.847	0.146	0.78	0.406683
833	ARL13B_KAN423-27_3.tif:0014-0810	2.678	1294.22	227	3408	145.693	130.574	0.5	3466.14	133305	3.894	0.257	0.817	1.73966
834	ARL13B_KAN423-27_3.tif:0015-0841	2.86	306.955	0	570	73.216	135.935	0.249	877.943	33765	2.321	0.431	0.474	0.44064
835	ARL13B_KAN423-27_3.tif:0016-0903	1.716	381.591	223	640	152.823	145.487	0.234	654.849	25185	7.046	0.142	0.579	0.328669
836	ARL13B_KAN423-27_3.tif:0017-0921	1.066	321.707	212	651	14.912	148.497	0.394	342.961	13190	5.781	0.173	0.726	0.172132
837	ARL13B_KAN423-27_3.tif:0018-0950	3.094	679.134	223	2225	122.616	153.129	0.367	2101.37	80817	5.67	0.176	0.723	1.05468
838	ARL13B_KAN423-27_3.tif:0019-0955	4.472	1091.26	223	3003	190.598	153.816	0.398	4880.39	187696	5.426	0.184	0.839	2.44947
839	ARL13B_KAN423-27_4.tif:0001-0037	1.482	265.263	151	401	35.315	6.101	0.267	393.144	15120	7.314	0.137	0.597	0.197319
840	ARL13B_KAN423-27_4.tif:0002-0093	5.33	497.093	221	1211	95.427	14.916	0.437	2649.66	101904	4.561	0.219	0.782	1.32987
841	ARL13B_KAN423-27_4.tif:0003-0122	4.706	831.315	54	3835	49.099	19.731	0.322	3912.4	150468	3.752	0.267	0.601	1.96364
842	ARL13B_KAN423-27_4.tif:0004-0322	2.418	799.376	130	2236	78.478	52.043	0.395	1933.01	74342	5.594	0.179	0.753	0.970177
843	ARL13B_KAN423-27_4.tif:0005-0332	4.264	760.341	222	1717	184.556	53.611	0.574	3242.29	124696	3.385	0.295	0.863	1.62731
844	ARL13B_KAN423-27_4.tif:0006-0403	3.302	882.394	221	2195	48.306	64.979	0.468	2913.84	112064	4.057	0.246	0.751	1.46246
845	ARL13B_KAN423-27_4.tif:0007-0445	4.03	527.387	225	1323	91.681	71.923	0.553	2125.5	81745	3.469	0.288	0.829	1.06679
846	ARL13B_KAN423-27_4.tif:0008-0545	1.04	268.475	214	363	150.583	87.918	0.368	279.231	10739	4.52	0.221	0.672	0.140146
847	ARL13B_KAN423-27_4.tif:0009-0672	2.756	467.5	194	1228	176.126	108.392	0.45	1288.51	49555	4.965	0.201	0.835	0.646702
848	ARL13B_KAN423-27_4.tif:0010-0716	2.756	439.123	176	1576	94.292	115.414	0.322	1210.3	46547	5.852	0.171	0.622	0.607447
849	ARL13B_KAN423-27_4.tif:0011-0712	3.874	483.691	220	1058	104.447	114.885	0.44	1873.93	72070	4.775	0.209	0.743	0.940527
850	ARL13B_KAN423-27_4.tif:0012-0842	2.73	575.552	226	1297	167.214	135.764	0.373	1571.35	60433	4.894	0.204	0.656	0.788662
851	ARL13B_KAN423-27_4.tif:0013-0876	3.458	697.105	25	1643	216.916	141.347	0.572	2410.74	92715	3.41	0.293	0.902	1.20995
852	ARL13B_KAN423-27_4.tif:0014-0939	1.638	384.46	114	1018	176.414	151.479	0.528	629.784	24221	3.91	0.256	0.834	0.316089
853	ARL13B_KAN423-27_4.tif:0015-0991	0.806	351	240	557	151.604	159.791	0.585	282.923	10881	3.442	0.291	0.756	0.141999
854	ARL13B_KAN423-27_4.tif:0016-1014	1.794	544.507	220	946	204.592	163.476	0.499	976.905	37571	3.997	0.25	0.758	0.490309
855	ARL13B_KAN423-27_5.tif:0001-0127	3.718	677.238	217	1597	189.714	20.597	0.467	2518.12	96845	4.461	0.224	0.794	1.26385
856	ARL13B_KAN423-27_5.tif:0002-0143	4.16	780.981	183	2650	131.606	23.041	0.266	3249.08	124957	7.883	0.127	0.702	1.63071
857	ARL13B_KAN423-27_5.tif:0003-0172	3.458	854.06	133	2045	183.493	27.734	0.486	2953.52	113590	3.909	0.256	0.813	1.48237
858	ARL13B_KAN423-27_5.tif:0004-0323	3.822	983.238	222	2270	220.086	52.077	0.397	3758.16	144536	5.43	0.184	0.803	1.88622
859	ARL13B_KAN423-27_5.tif:0005-0349	4.16	605.969	207	1683	144.848	55.942	0.329	2520.98	96955	3.126	0.32	0.563	1.26528
860	ARL13B_KAN423-27_5.tif:0006-0385	1.716	309.152	213	432	134.382	62.225	0.273	530.536	20404	7.283	0.137	0.684	0.266276
861	ARL13B_KAN423-27_5.tif:0007-0390	2.288	588.261	221	1748	190.259	62.935	0.388	1346.02	51767	4.984	0.201	0.677	0.675569
862	ARL13B_KAN423-27_5.tif:0008-0590	2.392	528.489	0	1577	191.963	94.911	0.264	1264.22	48621	3.027	0.33	0.465	0.634513
863	ARL13B_KAN423-27_5.tif:0009-0597	0.754	404.483	224	839	147.858	96.286	0.472	304.998	11730	3.804	0.263	0.716	0.153079
864	ARL13B_KAN423-27_5.tif:0010-0665	0.65	411.56	202	708	27.016	107.228	0.504	267.53	10289	3.434	0.291	0.667	0.134273
865	ARL13B_KAN423-27_5.tif:0011-0750	2.652	525.176	221	918	1.758	121.189	0.411	1392.85	53568	4.503	0.222	0.764	0.699073
866	ARL13B_KAN423-27_5.tif:0012-0802	0.988	402.553	234	846	64.135	129.267	0.41	397.746	15297	4.967	0.201	0.667	0.199629
867	ARL13B_KAN423-27_5.tif:0013-0880	0.598	321.391	221	531	211.697	141.939	0.408	192.204	7392	4.634	0.216	0.639	0.096467
868	ARL13B_KAN423-27_5.tif:0014-0924	1.456	548	232	1251	137.71	149.079	0.502	797.936	30688	3.818	0.262	0.727	0.400484
869	ARL13B_KAN423-27_5.tif:0015-1028	1.482	286.053	198	452	41.816	165.897	0.341	423.956	16305	4.095	0.244	0.543	0.212783
870	ARL13B_KAN423-27_5.tif:0016-1032	1.898	1041.19	222	2542	125.124	166.581	0.589	1976.3	76007	3.079	0.325	0.849	0.991906
871	ARL13B_KAN423-27_6.tif:0001-0017	4.836	790.876	221	1884	168.438	2.735	0.467	3824.91	147103	4.338	0.23	0.851	1.91972
872	ARL13B_KAN423-27_6.tif:0002-0065	3.016	389.586	223	952	41.903	10.442	0.399	1175.06	45192	4.677	0.214	0.739	0.589764
873	ARL13B_KAN423-27_6.tif:0003-0463	1.768	319.971	171	713	126.833	75.164	0.182	565.742	21758	8.799	0.114	0.493	0.283946
874	ARL13B_KAN423-27_6.tif:0004-0482	1.3	390.92	42	780	61.891	77.639	0.426	508.227	19546	3.108	0.322	0.621	0.255079
875	ARL13B_KAN423-27_6.tif:0005-0507	2.86	571.018	147	2472	201.63	81.817	0.532	1633.21	62812	3.823	0.262	0.856	0.819709
876	ARL13B_KAN423-27_6.tif:0006-0515	2.132	579.707	73	1501	153.39	83.301	0.484	1236.01	47536	4.185	0.239	0.906	0.620354
877	ARL13B_KAN423-27_6.tif:0007-0657	1.768	784.103	243	1737	150.615	105.937	0.59	1386.38	53319	3.413	0.293	0.8	0.695823
878	ARL13B_KAN423-27_6.tif:0008-0680	2.028	388.872	221	650	19.788	109.693	0.268	788.679	30332	7.772	0.129	0.658	0.395838
879	ARL13B_KAN423-27_6.tif:0009-0696	3.77	986.793	220	2718	124.866	112.37	0.389	3720.43	143085	4.659	0.215	0.676	1.86729
880	ARL13B_KAN423-27_6.tif:0010-0737	2.262	796.598	167	2308	213.915	118.722	0.469	1802.01	69304	2.824	0.354	0.654	0.904431
881	ARL13B_KAN423-27_6.tif:0011-0792	3.198	426.309	60	837	88.578	127.72	0.46	1363.42	52436	3.435	0.291	0.719	0.6843
882	ARL13B_KAN423-27_6.tif:0012-0887	1.976	669.697	209	1587	126.53	142.963	0.569	1323.4	50897	3.132	0.319	0.831	0.664216
883	ARL13B_KAN423-27_6.tif:0013-0936	1.352	809.981	220	2162	46.784	151.125	0.487	1095.16	42119	3.269	0.306	0.654	0.549661
884	ARL13B_KAN423-27_6.tif:0014-0987	2.938	450.23	200	1142	92.58	159.244	0.231	1322.86	50876	9.754	0.103	0.695	0.663942
885	ARL13B_KAN423-27_6.tif:0015-1000	1.69	561.231	211	1463	54.968	161.365	0.307	948.537	36480	6.448	0.155	0.605	0.476071
886	ARL13B_KAN423-27_6.tif:0016-1010	3.614	870.849	123	1935	108.008	162.954	0.308	3147.44	121048	4.143	0.241	0.598	1.5797
										69000.1				0.900465
985	ARL13B_KAN423-29_1.tif:0001-0050	3.562	1063.86	0	2763	149.324	7.665	0.388	3789.7	145749	2.283	0.438	0.61	1.90205
986	ARL13B_KAN423-29_1.tif:0002-0106	3.12	1160.08	139	3366	176.747	17.052	0.51	3619.65	139209	3.981	0.251	0.851	1.8167
987	ARL13B_KAN423-29_1.tif:0003-0114	3.38	838.069	226	1753	201.364	18.355	0.382	2832.84	108949	4.646	0.215	0.707	1.42181
988	ARL13B_KAN423-29_1.tif:0004-0107	4.03	1793.52	230	3741	100.84	17.331	0.484	7228.33	277996	4.254	0.235	0.849	3.6279
989	ARL13B_KAN423-29_1.tif:0005-0196	3.328	1009.1	225	2839	156.041	31.553	0.596	3358.49	129165	2.88	0.347	0.826	1.68563
990	ARL13B_KAN423-29_1.tif:0006-0247	2.938	725.31	217	1627	45.871	39.927	0.495	2131.09	81960	4.756	0.21	0.958	1.06959
991	ARL13B_KAN423-29_1.tif:0007-0321	3.016	1110.57	98	2866	206.112	51.557	0.48	3349.68	128826	3.328	0.301	0.792	1.6812
992	ARL13B_KAN423-29_1.tif:0008-0334	2.73	710.8	88	1950	8.773	53.708	0.345	1940.6	74634	5.49	0.182	0.795	0.973988
993	ARL13B_KAN423-29_1.tif:0009-0399	2.99	1128.75	224	3197	179.2	64.387	0.546	3375.16	129806	3.698	0.27	0.824	1.69399
994	ARL13B_KAN423-29_1.tif:0010-0514	3.536	562.294	207	1146	61.991	82.805	0.573	1988.39	76472	3.399	0.294	0.901	0.997974
995	ARL13B_KAN423-29_1.tif:0011-0519	2.86	1073.23	59	3805	133.333	83.828	0.517	3069.61	118055	3.391	0.295	0.78	1.54064
996	ARL13B_KAN423-29_1.tif:0012-0548	3.406	1243.57	223	3536	7.96	88.345	0.435	4235.84	162907	5.273	0.19	0.794	2.12597
997	ARL13B_KAN423-29_1.tif:0013-0568	4.628	883.764	227	2251	114.719	91.722	0.536	4090.31	157310	3.598	0.278	0.873	2.05293
998	ARL13B_KAN423-29_1.tif:0014-0618	3.874	1151.55	220	3733	72.458	99.772	0.455	4461.38	171581	4.105	0.244	0.768	2.23917
999	ARL13B_KAN423-29_1.tif:0015-0749	2.002	794.922	233	1779	95.212	120.794	0.431	1591.53	61209	5.007	0.2	0.778	0.798789
1000	ARL13B_KAN423-29_1.tif:0016-0765	4.68	933.617	220	1939	143.782	123.314	0.539	4369.59	168051	3.546	0.282	0.853	2.1931
1001	ARL13B_KAN423-29_1.tif:0017-0758	3.146	1243.57	159	3216	10.29	122.325	0.514	3912.51	150472	4.146	0.241	0.858	1.96369
1002	ARL13B_KAN423-29_1.tif:0018-0804	3.094	593.983	220	1444	179.204	129.677	0.6	1837.89	70684	3.022	0.331	0.853	0.92244
1003	ARL13B_KAN423-29_1.tif:0019-0885	3.016	612.741	135	1553	101.104	142.626	0.327	1848.14	71078	5.677	0.176	0.637	0.927582
1004	ARL13B_KAN423-29_1.tif:0020-0923	2.912	474.741	222	859	42.476	149.048	0.544	1382.53	53171	3.257	0.307	0.824	0.693892
1005	ARL13B_KAN423-29_1.tif:0021-0921	1.872	976.222	229	2344	112.821	148.554	0.555	1827.6	70288	3.483	0.287	0.823	0.917272
1006	ARL13B_KAN423-29_1.tif:0022-0945	3.484	612.687	82	1521	116.927	152.423	0.259	2134.73	82100	5.316	0.188	0.551	1.07142
1007	ARL13B_KAN423-29_1.tif:0023-0959	2.834	1138.93	233	2832	218.247	154.653	0.432	3227.91	124143	4.93	0.203	0.781	1.62009
1008	ARL13B_KAN423-29_1.tif:0024-1030	0.806	323.774	221	541	65.902	166.095	0.3	260.978	10037	6.626	0.151	0.579	0.130985
1009	ARL13B_KAN423-29_2.tif:0001-0105	2.756	1330.76	225	3770	138.763	17.114	0.555	3667.78	141060	3.281	0.305	0.791	1.84086
1010	ARL13B_KAN423-29_2.tif:0002-0115	2.574	837.818	216	2049	15.544	18.507	0.479	2156.67	82944	4.238	0.236	0.825	1.08244
1011	ARL13B_KAN423-29_2.tif:0003-0150	5.642	1139.65	112	3065	92.627	24.372	0.249	6430.32	247305	8.346	0.12	0.682	3.22738
1012	ARL13B_KAN423-29_2.tif:0004-0149	3.12	1715.91	227	3730	123.684	24.153	0.484	5353.96	205909	4.066	0.246	0.845	2.68715
1013	ARL13B_KAN423-29_2.tif:0005-0263	3.406	1449.25	225	3746	84.197	42.349	0.506	4936.45	189852	3.776	0.265	0.814	2.47761
1014	ARL13B_KAN423-29_2.tif:0006-0330	1.456	353.054	220	550	145.499	53.112	0.495	514.077	19771	4.394	0.228	0.737	0.258015
1015	ARL13B_KAN423-29_2.tif:0007-0398	3.25	1544.06	222	3754	72.02	64.005	0.533	5018.48	193007	2.69	0.372	0.731	2.51878
1016	ARL13B_KAN423-29_2.tif:0008-0410	3.042	1170.29	232	3527	27.151	66.168	0.445	3560.24	136924	4.678	0.214	0.783	1.78688
1017	ARL13B_KAN423-29_2.tif:0009-0440	3.588	1258.32	220	3168	204.875	70.956	0.442	4515.12	173648	4.788	0.209	0.802	2.26614
1018	ARL13B_KAN423-29_2.tif:0010-0486	3.848	1232.41	155	3407	39.557	78.495	0.367	4742.61	182397	5.703	0.175	0.746	2.38032
1019	ARL13B_KAN423-29_2.tif:0011-0572	1.846	1308.63	220	2981	32.421	92.243	0.591	2415.88	92913	3.359	0.298	0.821	1.21253
1020	ARL13B_KAN423-29_2.tif:0012-0595	2.86	1108.73	222	2833	191.544	96.093	0.565	3171.15	121960	3.289	0.304	0.853	1.5916
1021	ARL13B_KAN423-29_2.tif:0013-0632	3.224	1222.41	226	3454	155.601	101.87	0.384	3941.29	151579	5.402	0.185	0.813	1.97814
1022	ARL13B_KAN423-29_2.tif:0014-0638	5.512	1404.49	221	3687	56.596	102.748	0.35	7741.99	297751	6.563	0.152	0.8	3.88571
1023	ARL13B_KAN423-29_2.tif:0015-0690	3.224	1210.14	221	2970	105.666	111.242	0.388	3901.72	150057	5.558	0.18	0.782	1.95827
1024	ARL13B_KAN423-29_2.tif:0016-0786	1.534	381.915	220	697	28.493	126.591	0.258	585.893	22533	5.355	0.187	0.496	0.29406
1025	ARL13B_KAN423-29_2.tif:0017-0836	3.146	813.942	221	2521	42.953	134.936	0.25	2560.82	98487	9.214	0.109	0.706	1.28527
1026	ARL13B_KAN423-29_2.tif:0018-0828	3.926	887.96	147	2278	61.801	133.489	0.356	3486.34	134082	3.039	0.329	0.576	1.7498
1027	ARL13B_KAN423-29_2.tif:0019-0882	2.964	1525.71	227	3703	129.744	142.228	0.51	4522.48	173931	4.306	0.232	0.826	2.26983
1028	ARL13B_KAN423-29_2.tif:0020-0877	2.548	783.827	224	1727	25.469	141.619	0.413	1997.31	76815	3.777	0.265	0.69	1.00245
1029	ARL13B_KAN423-29_2.tif:0021-0904	4.55	492.926	222	993	77.997	145.723	0.479	2242.95	86262	4.336	0.231	0.824	1.12574
1030	ARL13B_KAN423-29_2.tif:0022-0955	3.094	1024.08	215	2824	183.269	154.045	0.381	3168.68	121865	5.399	0.185	0.768	1.59036
1031	ARL13B_KAN423-29_2.tif:0023-1001	2.808	941.426	223	1987	96.996	161.45	0.317	2643.68	101674	7.449	0.134	0.715	1.32687
1032	ARL13B_KAN423-29_3.tif:0001-0104	2.574	1430.49	222	3813	44.815	16.771	0.516	3682.32	141619	3.777	0.265	0.795	1.84816
1033	ARL13B_KAN423-29_3.tif:0002-0106	2.34	781.011	222	2340	125.99	17.085	0.374	1827.68	70291	5.53	0.181	0.679	0.917311
1034	ARL13B_KAN423-29_3.tif:0003-0233	3.224	1201.29	220	3071	205.202	37.493	0.504	3873.19	148960	3.763	0.266	0.782	1.94396
1035	ARL13B_KAN423-29_3.tif:0004-0234	4.706	1563.49	184	3762	85.203	37.918	0.454	7358.21	282991	2.952	0.339	0.672	3.69309
1036	ARL13B_KAN423-29_3.tif:0005-0338	4.888	705.644	168	1358	18.593	54.619	0.498	3449.39	132661	3.679	0.272	0.845	1.73125
1037	ARL13B_KAN423-29_3.tif:0006-0362	3.77	1327.11	233	3044	128.159	58.391	0.42	5003.51	192431	5.027	0.199	0.838	2.51126
1038	ARL13B_KAN423-29_3.tif:0007-0401	2.106	1669.09	29	3716	184.172	65.1	0.396	3515.31	135196	3.35	0.299	0.764	1.76433
1039	ARL13B_KAN423-29_3.tif:0008-0475	4.55	849.389	221	2791	118.432	76.7	0.556	3864.95	148643	3.446	0.29	0.85	1.93982
1040	ARL13B_KAN423-29_3.tif:0009-0481	3.822	1004.87	91	2404	74.09	77.409	0.34	3840.85	147716	6.042	0.166	0.73	1.92772
1041	ARL13B_KAN423-29_3.tif:0010-0520	2.522	1262.99	225	3196	137.873	83.901	0.593	3185.45	122510	3.359	0.298	0.84	1.59878
1042	ARL13B_KAN423-29_3.tif:0011-0629	2.47	852.516	222	2490	89.571	101.583	0.405	2105.84	80989	5.14	0.195	0.792	1.05692
1043	ARL13B_KAN423-29_3.tif:0012-0642	3.51	1589.19	220	3694	165.934	103.623	0.501	5578.4	214541	3.212	0.311	0.734	2.7998
1044	ARL13B_KAN423-29_3.tif:0013-0677	4.03	817.006	226	1705	207.243	108.963	0.254	3292.73	126636	7.719	0.13	0.639	1.65262
1045	ARL13B_KAN423-29_3.tif:0014-0683	4.368	1225.08	1	3659	192.377	110.254	0.397	5351.46	205813	4.636	0.216	0.718	2.6859
1046	ARL13B_KAN423-29_3.tif:0015-0742	1.716	412.591	159	1083	2.392	119.894	0.239	708.049	27231	5.908	0.169	0.504	0.35537
1047	ARL13B_KAN423-29_3.tif:0016-0777	2.288	919.841	220	2175	66.169	125.306	0.448	2104.72	80946	4.927	0.203	0.759	1.05636
1048	ARL13B_KAN423-29_3.tif:0017-0830	3.12	1256.83	223	3495	177.413	133.792	0.429	3921.56	150820	5.103	0.196	0.805	1.96823
1049	ARL13B_KAN423-29_3.tif:0018-0982	2.236	1040.66	221	2437	53.816	158.331	0.529	2327.06	89497	3.654	0.274	0.793	1.16795
1050	ARL13B_KAN423-29_3.tif:0019-0983	1.768	1011.38	221	2659	3.014	158.615	0.58	1788.23	68774	3.287	0.304	0.819	0.897514
1051	ARL13B_KAN423-29_3.tif:0020-1000	2.86	503.536	220	1136	107.007	161.254	0.524	1440.2	55389	3.495	0.286	0.761	0.722837
1052	ARL13B_KAN423-29_4.tif:0001-0011	2.392	333.913	112	642	204.758	1.965	0.58	798.768	30720	2.82	0.355	0.803	0.400902
1053	ARL13B_KAN423-29_4.tif:0002-0072	2.496	993.188	220	2999	111.949	11.639	0.468	2479.14	95346	4.635	0.216	0.771	1.24428
1054	ARL13B_KAN423-29_4.tif:0003-0118	4.42	1248.54	224	3775	77.716	19.046	0.415	5518.86	212251	5.379	0.186	0.821	2.76992
1055	ARL13B_KAN423-29_4.tif:0004-0114	3.016	1082.94	224	2875	184.994	18.43	0.584	3266.34	125621	3.506	0.285	0.853	1.63938
1056	ARL13B_KAN423-29_4.tif:0005-0161	3.016	761.457	143	2156	43.097	26.027	0.285	2296.69	88329	5.199	0.192	0.562	1.15271
1057	ARL13B_KAN423-29_4.tif:0006-0181	2.496	822.448	220	1903	3.804	29.374	0.404	2052.95	78955	5.268	0.19	0.688	1.03038
1058	ARL13B_KAN423-29_4.tif:0007-0217	4.16	1282.51	6	3628	94.882	34.918	0.289	5335.57	205202	3.271	0.306	0.532	2.67793
1059	ARL13B_KAN423-29_4.tif:0008-0245	2.912	1027.55	213	2515	209.585	39.616	0.472	2992.39	115085	3.821	0.262	0.765	1.50188
1060	ARL13B_KAN423-29_4.tif:0009-0284	4.732	1174.06	221	3030	193.927	45.899	0.382	5555.99	213679	5.712	0.175	0.741	2.78855
1061	ARL13B_KAN423-29_4.tif:0010-0348	2.938	1110.3	221	3793	23.518	56.176	0.447	3262.26	125464	5.102	0.196	0.819	1.63733
1062	ARL13B_KAN423-29_4.tif:0011-0368	3.328	1372.42	209	3459	6.616	59.47	0.463	4567.69	175670	5.018	0.199	0.862	2.29253
1063	ARL13B_KAN423-29_4.tif:0012-0420	2.912	914.357	121	2832	182.287	67.354	0.539	2662.77	102408	2.701	0.37	0.797	1.33644
1064	ARL13B_KAN423-29_4.tif:0013-0419	3.848	960.081	226	2203	64.609	67.643	0.537	3694.61	142092	3.239	0.309	0.798	1.85433
1065	ARL13B_KAN423-29_4.tif:0014-0461	3.042	1160.27	220	2590	1.816	74.32	0.518	3529.76	135752	4.045	0.247	0.821	1.77159
1066	ARL13B_KAN423-29_4.tif:0015-0473	3.874	1317.82	220	3701	209.482	76.401	0.405	5105.54	196355	5.181	0.193	0.786	2.56247
1067	ARL13B_KAN423-29_4.tif:0016-0494	2.704	1609.64	223	3785	45.465	79.577	0.545	4352.74	167403	3.627	0.276	0.893	2.18464
1068	ARL13B_KAN423-29_4.tif:0017-0558	2.132	1264.12	222	3333	103.839	89.946	0.597	2695.27	103658	3.363	0.297	0.872	1.35276
1069	ARL13B_KAN423-29_4.tif:0018-0588	2.756	1008.78	215	2760	149.325	94.961	0.47	2780.37	106931	4.638	0.216	0.855	1.39547
1070	ARL13B_KAN423-29_4.tif:0019-0676	3.64	438.807	220	881	120.449	109.038	0.518	1597.35	61433	3.846	0.26	0.819	0.801713
1071	ARL13B_KAN423-29_4.tif:0020-0784	1.95	1438.33	228	3794	96.646	126.494	0.595	2804.92	107875	3.147	0.318	0.838	1.40779
1072	ARL13B_KAN423-29_4.tif:0021-0959	4.446	928.807	84	2302	52.345	154.504	0.294	4129.73	158826	7.254	0.138	0.663	2.07271
1073	ARL13B_KAN423-29_4.tif:0022-0976	1.976	947.763	144	2237	6.098	157.459	0.593	1872.89	72030	3.278	0.305	0.864	0.940005
1074	ARL13B_KAN423-29_5.tif:0001-0126	3.224	1394.49	221	3775	188.578	20.276	0.554	4496.11	172917	3.474	0.288	0.835	2.2566
1075	ARL13B_KAN423-29_5.tif:0002-0221	2.236	1092.79	0	3217	14.608	35.464	0.345	2443.63	93980	3.031	0.33	0.579	1.22646
1076	ARL13B_KAN423-29_5.tif:0003-0241	2.704	1198.51	229	3738	81.473	38.838	0.524	3240.97	124645	3.578	0.279	0.776	1.62664
1077	ARL13B_KAN423-29_5.tif:0004-0327	1.612	298.161	81	459	218.923	52.7	0.513	480.665	18486	1.784	0.561	0.681	0.241246
1078	ARL13B_KAN423-29_5.tif:0005-0415	1.976	961.789	221	2522	84.979	67.042	0.558	1900.61	73096	3.586	0.279	0.772	0.953917
1079	ARL13B_KAN423-29_5.tif:0006-0585	2.21	1021.61	223	2676	16.705	94.382	0.484	2257.9	86837	4.337	0.231	0.806	1.13324
1080	ARL13B_KAN423-29_5.tif:0007-0583	2.444	1395.33	195	3767	64.409	93.944	0.6	3410.39	131161	3.24	0.309	0.866	1.71168
1081	ARL13B_KAN423-29_5.tif:0008-0744	3.666	1542.43	104	3826	140.568	119.535	0.356	5654.87	217482	3.822	0.262	0.618	2.83818
1082	ARL13B_KAN423-29_5.tif:0009-0811	2.34	997.478	234	2270	23.523	130.695	0.517	2334.24	89773	3.869	0.258	0.776	1.17156
1083	ARL13B_KAN423-29_5.tif:0010-0864	2.132	1347.19	221	3817	143.046	139.408	0.583	2872.39	110470	3.17	0.315	0.824	1.44165
1084	ARL13B_KAN423-29_5.tif:0011-0931	3.51	1071.54	185	2629	46.535	150.038	0.402	3761.33	144658	5.827	0.172	0.891	1.88781
1085	ARL13B_KAN423-29_5.tif:0012-1008	1.56	550.167	223	1079	176.996	162.645	0.427	858.312	33010	4.703	0.213	0.686	0.430787
1086	ARL13B_KAN423-29_6.tif:0001-0028	2.99	1489.36	199	3739	83.488	4.496	0.524	4453.44	171276	3.625	0.276	0.782	2.23518
1087	ARL13B_KAN423-29_6.tif:0002-0091	4.576	968.352	221	2103	112.76	14.795	0.585	4431.45	170430	3.336	0.3	0.844	2.22414
1088	ARL13B_KAN423-29_6.tif:0003-0187	1.612	432	224	779	2.666	30.154	0.344	696.426	26784	6.04	0.166	0.62	0.349536
1089	ARL13B_KAN423-29_6.tif:0004-0198	2.34	1083.21	220	3130	160.863	31.892	0.592	2534.87	97489	2.746	0.364	0.779	1.27225
1090	ARL13B_KAN423-29_6.tif:0005-0260	3.952	850.572	177	2602	153.854	42.009	0.53	3361.66	129287	3.833	0.261	0.856	1.68722
1091	ARL13B_KAN423-29_6.tif:0006-0279	2.912	993.705	45	3225	32.653	44.928	0.562	2893.84	111295	3.096	0.323	0.77	1.45242
1092	ARL13B_KAN423-29_6.tif:0007-0299	2.73	1271.67	223	3798	194.527	48.299	0.588	3471.86	133525	3.378	0.296	0.847	1.74253
1093	ARL13B_KAN423-29_6.tif:0008-0393	2.548	840.265	230	2228	135.208	63.375	0.397	2141.12	82346	5.023	0.199	0.751	1.07463
1094	ARL13B_KAN423-29_6.tif:0009-0431	4.186	1260.15	189	3702	118.559	69.551	0.516	5275.3	202884	4.213	0.237	0.863	2.64768
1095	ARL13B_KAN423-29_6.tif:0010-0443	3.38	1302.17	152	3785	95.81	71.512	0.549	4401.6	169282	3.536	0.283	0.861	2.20916
1096	ARL13B_KAN423-29_6.tif:0011-0482	3.406	899.672	106	2128	16.587	77.9	0.486	3064.47	117857	2.49	0.402	0.675	1.53806
1097	ARL13B_KAN423-29_6.tif:0012-0514	2.886	580.162	224	1707	196.74	83.001	0.336	1674.45	64398	6.449	0.155	0.655	0.840406
1098	ARL13B_KAN423-29_6.tif:0013-0520	3.328	820.477	194	2336	206.104	83.967	0.388	2730.71	105021	5.983	0.167	0.828	1.37054
1099	ARL13B_KAN423-29_6.tif:0014-0579	3.848	730.919	225	1503	136.966	93.375	0.53	2812.74	108176	4.136	0.242	0.884	1.41172
1100	ARL13B_KAN423-29_6.tif:0015-0603	5.018	1112.02	230	3690	72.572	97.247	0.39	5580.43	214619	4.71	0.212	0.719	2.80082
1101	ARL13B_KAN423-29_6.tif:0016-0629	3.848	1399.81	221	3752	110.548	101.509	0.522	5386.8	207172	3.452	0.29	0.855	2.70363
1102	ARL13B_KAN423-29_6.tif:0017-0629	3.744	791.361	7	2226	46.523	101.267	0.482	2963.03	113956	2.292	0.436	0.676	1.48715
1103	ARL13B_KAN423-29_6.tif:0018-0794	4.108	1056.25	192	2758	111.345	128.366	0.459	4339.32	166887	4.296	0.233	0.859	2.17791
1104	ARL13B_KAN423-29_6.tif:0019-0944	3.588	1131.51	220	3783	131.293	152.26	0.571	4060.09	156148	3.339	0.299	0.882	2.03776
1105	ARL13B_KAN423-29_6.tif:0020-1009	3.406	867.26	220	3281	7.481	162.666	0.336	2954.06	113611	6.587	0.152	0.724	1.48265
1106	ARL13B_KAN423-29_6.tif:0021-1024	3.9	1160.85	230	3772	166.244	165.192	0.453	4527.57	174127	3.503	0.285	0.744	2.27239
										127413				1.66277
1107	ARL13B_KAN423-30_1.tif:0001-0141	2.418	820.796	229	1983	39.601	22.883	0.516	1984.8	76334	3.729	0.268	0.762	0.996173
1108	ARL13B_KAN423-30_1.tif:0002-0168	3.172	738.262	225	1622	16.245	27.036	0.356	2341.91	90068	5.877	0.17	0.722	1.1754
1109	ARL13B_KAN423-30_1.tif:0003-0211	2.496	706.792	220	1833	39.664	34.049	0.546	1764.26	67852	4.086	0.245	0.828	0.885482
1110	ARL13B_KAN423-30_1.tif:0004-0243	2.626	1275.99	142	3211	143.208	39.13	0.509	3350.95	128875	2.788	0.359	0.719	1.68184
1111	ARL13B_KAN423-30_1.tif:0005-0273	2.132	876.768	221	2332	6.535	43.923	0.419	1869.38	71895	4.761	0.21	0.692	0.938244
1112	ARL13B_KAN423-30_1.tif:0006-0298	1.872	959.903	227	2733	103.639	48.084	0.571	1797.05	69113	3.306	0.302	0.796	0.901938
1113	ARL13B_KAN423-30_1.tif:0007-0363	3.614	1306.24	219	3443	142.459	58.489	0.376	4721.03	181567	5.549	0.18	0.762	2.36948
1114	ARL13B_KAN423-30_1.tif:0008-0413	1.612	777.452	171	2155	0.801	67.01	0.415	1253.33	48202	4.361	0.229	0.849	0.629045
1115	ARL13B_KAN423-30_1.tif:0009-0568	3.64	836.964	173	2078	159.276	91.665	0.35	3046.73	117175	5.981	0.167	0.798	1.52916
1116	ARL13B_KAN423-30_1.tif:0010-0583	1.404	507.574	200	1325	215.331	94.071	0.529	712.677	27409	3.188	0.314	0.788	0.357693
1117	ARL13B_KAN423-30_1.tif:0011-0606	2.496	1141.33	222	3416	197.793	97.892	0.449	2848.94	109568	4.67	0.214	0.771	1.42988
1118	ARL13B_KAN423-30_1.tif:0012-0637	3.9	1208.69	187	3300	105.236	102.887	0.435	4714.16	181303	5.251	0.19	0.822	2.36604
1119	ARL13B_KAN423-30_1.tif:0013-0692	1.95	643.987	173	1685	169.167	111.661	0.552	1255.85	48299	3.825	0.261	0.909	0.630311
1120	ARL13B_KAN423-30_1.tif:0014-0705	2.496	716.948	226	1568	114.538	113.68	0.336	1789.61	68827	6.481	0.154	0.768	0.898206
1121	ARL13B_KAN423-30_1.tif:0015-0788	2.522	893.598	227	2428	69.031	127.196	0.408	2253.79	86679	5.014	0.199	0.708	1.13118
1122	ARL13B_KAN423-30_1.tif:0016-0940	1.638	443.873	221	817	53.698	151.697	0.463	727.108	27964	4.727	0.212	0.808	0.364936
1123	ARL13B_KAN423-30_2.tif:0001-0064	1.274	397.163	66	817	82.423	10.22	0.521	506.016	19461	2.501	0.4	0.685	0.25397
1124	ARL13B_KAN423-30_2.tif:0002-0087	2.574	679.273	232	1423	204.205	14.051	0.485	1748.55	67248	4.167	0.24	0.822	0.877599
1125	ARL13B_KAN423-30_2.tif:0003-0092	3.874	796.094	4	2591	143.048	15.251	0.458	3084.25	118618	2.33	0.429	0.664	1.54799
1126	ARL13B_KAN423-30_2.tif:0004-0103	4.29	993.861	94	3138	61.112	16.556	0.369	4263.92	163987	4.469	0.224	0.695	2.14006
1127	ARL13B_KAN423-30_2.tif:0005-0180	2.392	898.478	170	2119	16.335	29.29	0.447	2149.29	82660	4.432	0.226	0.736	1.07873
1128	ARL13B_KAN423-30_2.tif:0006-0502	2.08	703.263	115	1414	111.321	81	0.387	1462.87	56261	5.889	0.17	0.769	0.734217
1129	ARL13B_KAN423-30_2.tif:0007-0565	3.146	833.017	222	2017	171.687	90.988	0.334	2620.83	100795	6.012	0.166	0.725	1.31539
1130	ARL13B_KAN423-30_2.tif:0008-0577	2.054	761.076	102	2735	128.003	93.03	0.263	1563.34	60125	6.729	0.149	0.585	0.784643
1131	ARL13B_KAN423-30_2.tif:0009-0584	3.042	647.65	75	1831	219.615	93.996	0.379	1970.27	75775	3.293	0.304	0.621	0.988878
1132	ARL13B_KAN423-30_2.tif:0010-0628	2.73	992.181	127	2733	31.928	101.306	0.572	2708.82	104179	2.78	0.36	0.792	1.35956
1133	ARL13B_KAN423-30_2.tif:0011-0674	2.678	664.223	221	1539	18.54	108.798	0.325	1778.9	68415	6.496	0.154	0.777	0.892829
1134	ARL13B_KAN423-30_2.tif:0012-0668	2.366	875.593	51	2479	61.008	107.677	0.59	2071.78	79679	2.392	0.418	0.749	1.03983
1135	ARL13B_KAN423-30_2.tif:0013-0926	0.598	319.826	228	432	94.671	149.447	0.59	191.268	7356	2.436	0.41	0.754	0.0959972
1136	ARL13B_KAN423-30_2.tif:0014-0985	3.588	716.594	211	1559	99.428	158.823	0.586	2571.3	98890	3.619	0.276	0.868	1.29053
1137	ARL13B_KAN423-30_3.tif:0001-0044	2.912	914.589	215	2558	178.154	6.954	0.443	2663.44	102434	4.64	0.216	0.815	1.33678
1138	ARL13B_KAN423-30_3.tif:0002-0117	0.91	482	193	988	54.777	18.892	0.469	438.646	16870	4.294	0.233	0.729	0.220157
1139	ARL13B_KAN423-30_3.tif:0003-0133	1.56	348.883	198	541	147.796	21.29	0.559	544.291	20933	2.695	0.371	0.851	0.27318
1140	ARL13B_KAN423-30_3.tif:0004-0141	1.534	315.898	89	643	156.635	22.535	0.399	484.617	18638	3.7	0.27	0.628	0.24323
1141	ARL13B_KAN423-30_3.tif:0005-0271	3.302	1465.63	222	3684	198.063	43.703	0.513	4839.8	186135	3.962	0.252	0.833	2.4291
1142	ARL13B_KAN423-30_3.tif:0006-0326	2.782	1547.66	229	3709	81.831	52.422	0.496	4305.86	165600	3.658	0.273	0.767	2.16111
1143	ARL13B_KAN423-30_3.tif:0007-0408	3.432	796.864	224	2035	157.075	65.817	0.404	2735	105186	4.518	0.221	0.748	1.3727
1144	ARL13B_KAN423-30_3.tif:0008-0564	5.148	768.707	223	1751	90.831	90.862	0.591	3957.54	152204	3.241	0.309	0.859	1.98629
1145	ARL13B_KAN423-30_3.tif:0009-0815	3.12	796.783	220	2466	101.421	131.585	0.492	2486.11	95614	3.358	0.298	0.723	1.24778
1146	ARL13B_KAN423-30_3.tif:0010-0832	3.068	758.407	222	1712	72.987	134.111	0.501	2326.93	89492	4.091	0.244	0.852	1.16789
1147	ARL13B_KAN423-30_3.tif:0011-0881	3.302	427.236	220	862	42.397	142.214	0.358	1410.82	54259	5.751	0.174	0.758	0.70809
1148	ARL13B_KAN423-30_3.tif:0012-0951	2.418	320.839	210	578	40.818	153.367	0.458	775.835	29838	4.467	0.224	0.772	0.389392
1149	ARL13B_KAN423-30_3.tif:0013-0962	3.25	377.736	221	727	48.79	154.814	0.369	1227.72	47217	4.584	0.218	0.718	0.616191
1150	ARL13B_KAN423-30_3.tif:0014-0987	2.99	404.878	220	818	101.267	159.47	0.422	1210.66	46561	3.539	0.283	0.637	0.60763
1151	ARL13B_KAN423-30_3.tif:0015-1028	0.624	316.083	222	441	192.264	165.705	0.517	197.248	7586	3.793	0.264	0.762	0.0989988
1152	ARL13B_KAN423-30_4.tif:0001-0138	1.04	370.35	166	711	104.962	22.273	0.497	385.187	14814	3.79	0.264	0.727	0.193326
1153	ARL13B_KAN423-30_4.tif:0002-0142	3.25	719.344	112	1711	135.132	22.8	0.575	2338.01	89918	2.671	0.374	0.751	1.17345
1154	ARL13B_KAN423-30_4.tif:0003-0165	4.056	719.737	223	2057	37.079	26.431	0.413	2919.43	112279	4.262	0.235	0.706	1.46526
1155	ARL13B_KAN423-30_4.tif:0004-0233	3.328	702.289	222	1936	64.38	37.594	0.479	2337.36	89893	4.19	0.239	0.815	1.17312
1156	ARL13B_KAN423-30_4.tif:0005-0304	4.056	1385.26	221	3693	132.361	49.004	0.568	5618.96	216101	3.238	0.309	0.819	2.82016
1157	ARL13B_KAN423-30_4.tif:0006-0341	3.406	894.298	199	2156	151.19	55.159	0.503	3046.16	117153	4.073	0.245	0.853	1.52887
1158	ARL13B_KAN423-30_4.tif:0007-0393	3.822	525.993	217	1421	9.026	63.386	0.385	2010.47	77321	5.698	0.176	0.805	1.00905
1159	ARL13B_KAN423-30_4.tif:0008-0425	2.6	602.72	173	1521	165.383	68.602	0.395	1567.17	60272	4.955	0.202	0.692	0.786561
1160	ARL13B_KAN423-30_4.tif:0009-0632	2.678	348.874	141	549	198.244	102.476	0.348	934.34	35934	4.794	0.209	0.808	0.468946
1161	ARL13B_KAN423-30_4.tif:0010-0628	1.196	390.696	218	609	138.906	101.346	0.433	467.3	17972	5.129	0.195	0.742	0.234538
1162	ARL13B_KAN423-30_4.tif:0011-0649	2.236	535.651	82	1265	101.646	104.471	0.365	1197.79	46066	5.207	0.192	0.745	0.60117
1163	ARL13B_KAN423-30_4.tif:0012-0652	2.158	861.639	237	2170	79.383	105.311	0.443	1859.53	71516	4.223	0.237	0.722	0.933298
1164	ARL13B_KAN423-30_4.tif:0013-0793	3.354	525.628	94	1064	147.922	127.798	0.527	1763.06	67806	3.672	0.272	0.835	0.884881
1165	ARL13B_KAN423-30_4.tif:0014-0863	2.652	940.392	222	2417	83.354	139.331	0.433	2494.07	95920	4.682	0.214	0.794	1.25177
1166	ARL13B_KAN423-30_4.tif:0015-0901	4.056	776.122	161	2045	21.676	145.533	0.286	3148.14	121075	5.431	0.184	0.605	1.58005
1167	ARL13B_KAN423-30_5.tif:0001-0013	2.626	607.624	229	1222	42.611	2.177	0.502	1595.72	61370	3.832	0.261	0.792	0.80089
1168	ARL13B_KAN423-30_5.tif:0002-0033	3.848	901.966	221	2343	206.218	5.483	0.577	3470.97	133491	3.293	0.304	0.841	1.74208
1169	ARL13B_KAN423-30_5.tif:0003-0127	3.432	989.818	224	2306	87.869	20.559	0.537	3397.26	130656	3.621	0.276	0.807	1.70509
1170	ARL13B_KAN423-30_5.tif:0004-0125	2.028	1028.44	101	3869	149.748	20.233	0.564	2085.79	80218	2.849	0.351	0.804	1.04686
1171	ARL13B_KAN423-30_5.tif:0005-0174	2.834	1075.99	181	2381	216.339	28.004	0.515	3049.54	117283	3.799	0.263	0.905	1.53057
1172	ARL13B_KAN423-30_5.tif:0006-0212	3.302	794.677	227	1903	191.712	34.173	0.512	2624.18	100924	3.968	0.252	0.804	1.31708
1173	ARL13B_KAN423-30_5.tif:0007-0247	3.874	1648.45	87	3776	90.395	39.645	0.586	6386.48	245619	2.197	0.455	0.745	3.20538
1174	ARL13B_KAN423-30_5.tif:0008-0255	2.99	1039.99	141	3325	11.016	41.208	0.501	3109.76	119599	3.55	0.282	0.759	1.56079
1175	ARL13B_KAN423-30_5.tif:0009-0407	2.262	1157.61	221	3415	123.029	65.65	0.588	2618.67	100712	3.114	0.321	0.806	1.31431
1176	ARL13B_KAN423-30_5.tif:0010-0458	3.068	1524.43	220	3732	176.998	73.746	0.472	4677.24	179883	4.211	0.237	0.837	2.34751
1177	ARL13B_KAN423-30_5.tif:0011-0543	2.47	826.968	226	1710	166.346	87.587	0.431	2042.73	78562	5.076	0.197	0.782	1.02525
1178	ARL13B_KAN423-30_5.tif:0012-0600	0.702	370.296	235	599	71.843	96.801	0.439	259.964	9998	4.91	0.204	0.684	0.130476
1179	ARL13B_KAN423-30_5.tif:0013-0602	1.456	708.196	156	1989	149.939	97.225	0.525	1031.2	39659	3.732	0.268	0.794	0.517558
1180	ARL13B_KAN423-30_5.tif:0014-0609	0.884	387.412	161	776	69.949	98.206	0.53	342.493	13172	2.956	0.338	0.708	0.171897
1181	ARL13B_KAN423-30_5.tif:0015-0702	2.054	887.759	228	2312	217.527	113.27	0.504	1823.57	70133	3.995	0.25	0.823	0.915249
1182	ARL13B_KAN423-30_5.tif:0016-0819	2.34	572.822	102	1186	36.856	132.341	0.357	1340.48	51554	4.571	0.219	0.643	0.67279
1183	ARL13B_KAN423-30_5.tif:0017-0933	2.548	705.582	220	1712	37.644	150.522	0.405	1797.93	69147	4.706	0.212	0.69	0.902382
1184	ARL13B_KAN423-30_5.tif:0018-0995	3.224	774.161	221	1852	102.849	160.541	0.342	2496.05	95996	6.43	0.156	0.785	1.25277
1185	ARL13B_KAN423-30_5.tif:0019-1003	1.95	624.733	229	1396	175.729	161.817	0.322	1218.3	46855	7.224	0.138	0.661	0.611467
1186	ARL13B_KAN423-30_6.tif:0001-0056	3.406	1049.4	97	3467	68.721	8.979	0.533	3574.46	137471	3.434	0.291	0.73	1.79402
1187	ARL13B_KAN423-30_6.tif:0002-0089	2.366	720.934	222	1711	219.933	14.405	0.386	1705.83	65605	4.486	0.223	0.657	0.856158
1188	ARL13B_KAN423-30_6.tif:0003-0097	2.47	490.379	133	1025	109.683	15.78	0.296	1211.31	46586	5.616	0.178	0.704	0.607956
1189	ARL13B_KAN423-30_6.tif:0004-0119	2.6	824.51	224	2003	63.424	19.327	0.44	2143.86	82451	4.469	0.224	0.746	1.076
1190	ARL13B_KAN423-30_6.tif:0005-0157	2.938	1202.55	196	2964	162.465	25.421	0.452	3533.3	135888	4.717	0.212	0.834	1.77336
1191	ARL13B_KAN423-30_6.tif:0006-0160	3.614	978.201	119	2482	63.818	25.878	0.455	3535.43	135970	3.658	0.273	0.755	1.77443
1192	ARL13B_KAN423-30_6.tif:0007-0201	3.354	824.14	219	2363	170.359	32.413	0.456	2764.33	106314	4.29	0.233	0.752	1.38742
1193	ARL13B_KAN423-30_6.tif:0008-0213	4.056	899.237	222	2434	120.864	34.389	0.416	3647.53	140281	5.103	0.196	0.796	1.83069
1194	ARL13B_KAN423-30_6.tif:0009-0243	3.38	729.123	0	2686	78.908	38.895	0.274	2464.58	94786	2.632	0.38	0.543	1.23698
1195	ARL13B_KAN423-30_6.tif:0010-0426	3.926	1488.76	207	3751	137.389	68.529	0.406	5845.2	224802	5.178	0.193	0.805	2.93371
1196	ARL13B_KAN423-30_6.tif:0011-0456	3.12	831.467	94	2222	169.1	73.619	0.337	2594.33	99776	5.865	0.171	0.68	1.3021
1197	ARL13B_KAN423-30_6.tif:0012-0464	2.886	1381.75	227	3452	24.27	74.963	0.581	3987.96	153374	3.447	0.29	0.828	2.00156
1198	ARL13B_KAN423-30_6.tif:0013-0487	3.276	1143.4	220	3366	107.116	78.535	0.388	3745.99	144068	5.315	0.188	0.737	1.88012
1199	ARL13B_KAN423-30_6.tif:0014-0489	4.238	535.233	206	1449	146.398	78.633	0.463	2268.45	87243	3.539	0.283	0.724	1.13854
1200	ARL13B_KAN423-30_6.tif:0015-0661	1.456	264.143	206	362	220.204	106.874	0.502	384.615	14792	2.819	0.355	0.696	0.193038
1201	ARL13B_KAN423-30_6.tif:0016-0672	2.626	606.426	171	1741	140.097	108.417	0.221	1592.57	61249	5.08	0.197	0.456	0.799311
1202	ARL13B_KAN423-30_6.tif:0017-0689	2.626	347.257	151	630	205.168	111.182	0.561	911.953	35073	3.355	0.298	0.867	0.457709
1203	ARL13B_KAN423-30_6.tif:0018-0692	2.522	1228.53	155	3289	85.773	111.571	0.462	3098.53	119167	4.477	0.223	0.764	1.55515
1204	ARL13B_KAN423-30_6.tif:0019-0695	1.222	615.149	225	1211	187.072	112.143	0.525	751.757	28912	3.736	0.268	0.79	0.377307
1205	ARL13B_KAN423-30_6.tif:0020-0733	3.25	741.632	229	1706	211.281	118.211	0.285	2410.45	92704	7.197	0.139	0.649	1.20981
1206	ARL13B_KAN423-30_6.tif:0021-0789	2.158	690.976	221	1559	7.609	127.26	0.54	1491.22	57351	3.964	0.252	0.787	0.748442
1207	ARL13B_KAN423-30_6.tif:0022-0810	1.456	272.75	94	459	90.741	130.944	0.557	397.148	15274	1.536	0.651	0.713	0.199329
1208	ARL13B_KAN423-30_6.tif:0023-0889	2.34	1178.31	221	2725	118.365	143.444	0.467	2757.41	106048	4.527	0.221	0.833	1.38395
										86345.1				1.12682
1209	ARL13B_KAN423-31_1.tif:0001-0082	3.926	395.132	221	645	6.504	13.323	0.554	1551.38	59665	3.342	0.299	0.863	0.77864
1210	ARL13B_KAN423-31_1.tif:0002-0190	5.304	660.324	169	1476	207.279	30.567	0.537	3502.57	134706	3.712	0.269	0.876	1.75794
1211	ARL13B_KAN423-31_1.tif:0003-0385	1.69	799.031	236	1949	12.648	62.202	0.503	1350.44	51937	3.935	0.254	0.743	0.677788
1212	ARL13B_KAN423-31_1.tif:0004-0447	3.588	480.935	136	880	6.409	72.169	0.576	1725.7	66369	3.02	0.331	0.824	0.866128
1213	ARL13B_KAN423-31_1.tif:0005-0595	4.082	1025.39	225	3088	20.607	95.736	0.479	4185.91	160987	3.784	0.264	0.751	2.10091
1214	ARL13B_KAN423-31_1.tif:0006-0714	4.16	788.106	221	1988	78.592	115.179	0.542	3278.72	126097	3.645	0.274	0.849	1.64559
1215	ARL13B_KAN423-31_1.tif:0007-0719	4.654	793.581	226	2205	62.083	116.052	0.48	3693.55	142051	3.884	0.257	0.763	1.85379
1216	ARL13B_KAN423-31_1.tif:0008-0723	2.106	523.074	221	1202	1.183	116.439	0.463	1101.66	42369	3.706	0.27	0.783	0.552924
1217	ARL13B_KAN423-31_1.tif:0009-0737	3.12	466.542	220	829	207.224	118.61	0.35	1455.7	55985	5.26	0.19	0.71	0.730615
1218	ARL13B_KAN423-31_1.tif:0010-0788	2.21	1061.52	243	2379	202.988	127.129	0.486	2346.09	90229	3.887	0.257	0.769	1.17751
1219	ARL13B_KAN423-31_1.tif:0011-0806	1.3	667.18	226	1344	222.093	129.938	0.578	867.386	33359	3.343	0.299	0.84	0.435341
1220	ARL13B_KAN423-31_1.tif:0012-0895	3.718	633.636	196	1654	11.055	144.358	0.415	2356	90610	5.155	0.194	0.763	1.18248
1221	ARL13B_KAN423-31_1.tif:0013-0927	2.522	752.619	220	1797	172.405	149.8	0.372	1898.22	73004	5.278	0.189	0.708	0.952716
1222	ARL13B_KAN423-31_1.tif:0014-0941	1.456	282.357	143	426	76.001	151.952	0.575	411.137	15812	2.514	0.398	0.83	0.20635
1223	ARL13B_KAN423-31_1.tif:0015-1017	1.872	745.389	230	1898	54.547	164.02	0.472	1395.45	53668	4.238	0.236	0.762	0.700378
1224	ARL13B_KAN423-31_2.tif:0001-0055	1.924	932.014	222	2352	16.262	8.906	0.439	1793.3	68969	4.841	0.207	0.751	0.900059
1225	ARL13B_KAN423-31_2.tif:0002-0052	1.872	1252.25	227	3838	195.986	8.398	0.574	2344.35	90162	3.416	0.293	0.804	1.17663
1226	ARL13B_KAN423-31_2.tif:0003-0074	1.352	616.769	229	1383	21.096	11.911	0.513	833.922	32072	3.983	0.251	0.738	0.418546
1227	ARL13B_KAN423-31_2.tif:0004-0099	4.394	475.373	88	1271	65.49	15.697	0.235	2088.91	80338	5.987	0.167	0.495	1.04843
1228	ARL13B_KAN423-31_2.tif:0005-0099	2.808	1359.23	222	3468	115.742	15.932	0.537	3816.95	146797	3.742	0.267	0.831	1.91573
1229	ARL13B_KAN423-31_2.tif:0006-0266	1.118	339.093	157	599	29.852	43.026	0.286	379.129	14581	4.064	0.246	0.497	0.190285
1230	ARL13B_KAN423-31_2.tif:0007-0297	2.808	999.37	220	2738	10.539	47.997	0.571	2806.4	107932	3.558	0.281	0.831	1.40853
1231	ARL13B_KAN423-31_2.tif:0008-0336	2.834	1184.38	232	3724	148.216	54.144	0.467	3356.72	129097	3.863	0.259	0.708	1.68474
1232	ARL13B_KAN423-31_2.tif:0009-0353	3.328	1214.06	225	3424	126.138	56.929	0.486	4040.62	155399	4.376	0.229	0.908	2.02799
1233	ARL13B_KAN423-31_2.tif:0010-0388	2.574	464.364	19	2070	46.139	62.323	0.219	1195.34	45972	7.673	0.13	0.528	0.599943
1234	ARL13B_KAN423-31_2.tif:0011-0493	2.808	1276.8	226	3702	99.445	79.389	0.406	3585.46	137894	4.998	0.2	0.758	1.79954
1235	ARL13B_KAN423-31_2.tif:0012-0600	1.898	580.877	228	1180	130.976	96.879	0.363	1102.57	42404	5.588	0.179	0.709	0.55338
1236	ARL13B_KAN423-31_2.tif:0013-0600	2.132	748.72	165	1834	44.717	96.862	0.525	1596.37	61395	2.952	0.339	0.756	0.801217
1237	ARL13B_KAN423-31_2.tif:0014-0616	1.794	314.696	221	473	203.807	99.048	0.37	564.598	21714	4.265	0.234	0.704	0.283372
1238	ARL13B_KAN423-31_2.tif:0015-0756	1.508	670.931	232	1604	158.172	121.994	0.412	1011.83	38914	5.038	0.198	0.699	0.507835
1239	ARL13B_KAN423-31_2.tif:0016-0788	2.262	1080.03	221	2532	43.442	127.12	0.52	2443.18	93963	4.446	0.225	0.829	1.22624
1240	ARL13B_KAN423-31_2.tif:0017-0793	2.132	300.915	203	465	194.517	127.844	0.51	641.589	24675	3.461	0.289	0.859	0.322014
1241	ARL13B_KAN423-31_2.tif:0018-0829	2.21	890.271	226	1971	96.702	133.662	0.401	1967.62	75673	5.358	0.187	0.769	0.987547
1242	ARL13B_KAN423-31_2.tif:0019-0914	3.172	727.5	44	1570	2.239	147.591	0.446	2307.77	88755	3.424	0.292	0.728	1.15827
1243	ARL13B_KAN423-31_3.tif:0001-0013	3.198	745.512	220	1886	38.099	2.058	0.484	2384.29	91698	3.902	0.256	0.801	1.19668
1244	ARL13B_KAN423-31_3.tif:0002-0033	3.562	1013.74	215	2777	155.308	5.271	0.474	3611.15	138882	4.336	0.231	0.828	1.81244
1245	ARL13B_KAN423-31_3.tif:0003-0120	3.796	1187.77	220	3198	71.9	19.591	0.502	4509.04	173414	3.913	0.256	0.807	2.26309
1246	ARL13B_KAN423-31_3.tif:0004-0147	2.548	902.704	229	2115	149.033	23.895	0.506	2300.23	88465	3.513	0.285	0.763	1.15449
1247	ARL13B_KAN423-31_3.tif:0005-0172	4.212	911.29	192	2365	39.115	27.866	0.531	3838.59	147629	3.529	0.283	0.812	1.92659
1248	ARL13B_KAN423-31_3.tif:0006-0282	2.262	864	230	1866	71.147	45.616	0.518	1954.49	75168	4.017	0.249	0.763	0.980957
1249	ARL13B_KAN423-31_3.tif:0007-0284	3.198	1359.25	220	3737	168.934	45.823	0.463	4347.15	167188	4.283	0.234	0.817	2.18184
1250	ARL13B_KAN423-31_3.tif:0008-0325	3.406	1114.2	221	3574	86.578	52.571	0.599	3795.19	145960	3.318	0.301	0.853	1.90481
1251	ARL13B_KAN423-31_3.tif:0009-0334	5.122	604.558	0	1689	173.343	53.906	0.389	3096.73	119098	2.974	0.336	0.62	1.55425
1252	ARL13B_KAN423-31_3.tif:0010-0347	0.91	252.4	146	424	216.464	55.928	0.337	229.698	8834	6.2	0.161	0.7	0.115285
1253	ARL13B_KAN423-31_3.tif:0011-0371	2.73	1041.38	229	3499	85.469	59.983	0.545	2843.14	109345	3.757	0.266	0.854	1.42697
1254	ARL13B_KAN423-31_3.tif:0012-0428	1.742	343.239	209	564	219.496	69.055	0.554	597.958	22997	3.451	0.29	0.865	0.300115
1255	ARL13B_KAN423-31_3.tif:0013-0637	2.86	1034.4	220	2980	65.576	102.562	0.433	2958.56	113784	3.506	0.285	0.671	1.4849
1256	ARL13B_KAN423-31_3.tif:0014-0678	1.586	464.016	220	861	10.879	109.146	0.454	735.974	28305	3.689	0.271	0.678	0.369386
1257	ARL13B_KAN423-31_3.tif:0015-0782	2.314	706.337	220	1905	8.919	126.084	0.416	1634.56	62864	5.103	0.196	0.724	0.820387
1258	ARL13B_KAN423-31_3.tif:0016-0791	3.432	1519.95	223	3764	80.125	127.631	0.521	5216.8	200634	3.431	0.291	0.774	2.61831
1259	ARL13B_KAN423-31_3.tif:0017-0836	3.198	1286.95	222	3527	74.059	134.581	0.412	4115.92	158295	3.831	0.261	0.667	2.06578
1260	ARL13B_KAN423-31_3.tif:0018-0841	2.756	727.887	114	2105	53.167	135.578	0.428	2006.18	77156	5.487	0.182	0.8	1.0069
1261	ARL13B_KAN423-31_3.tif:0019-0868	2.834	1175.28	229	3751	188.023	139.794	0.593	3330.96	128106	2.963	0.337	0.823	1.67181
1262	ARL13B_KAN423-31_3.tif:0020-0887	2.756	1469.39	229	3791	148.475	143.011	0.51	4049.87	155755	3.97	0.252	0.831	2.03263
1263	ARL13B_KAN423-31_3.tif:0021-0904	4.004	558.617	60	1739	47.042	145.677	0.593	2236.84	86027	2.781	0.36	0.78	1.12267
1264	ARL13B_KAN423-31_3.tif:0022-0942	3.172	1082.38	226	2868	123.516	152.094	0.39	3433.51	132050	5.012	0.2	0.707	1.72328
1265	ARL13B_KAN423-31_3.tif:0023-0967	2.782	1031.43	197	2610	54.74	155.954	0.485	2869.61	110363	4.122	0.243	0.796	1.44026
1266	ARL13B_KAN423-31_3.tif:0024-0985	1.378	331.302	193	685	221.316	158.961	0.261	456.561	17559	7.248	0.138	0.546	0.229148
1267	ARL13B_KAN423-31_3.tif:0025-1029	1.664	1102.55	239	2938	98.35	165.984	0.508	1834.75	70563	3.52	0.284	0.749	0.920861
1268	ARL13B_KAN423-31_4.tif:0001-0014	3.588	1028.07	220	2546	56.905	2.281	0.517	3688.92	141873	3.74	0.267	0.831	1.85147
1269	ARL13B_KAN423-31_4.tif:0002-0025	1.924	400.892	225	669	106.004	3.953	0.485	771.362	29666	4.175	0.24	0.767	0.387147
1270	ARL13B_KAN423-31_4.tif:0003-0066	1.742	315.179	223	488	204.278	10.54	0.548	549.075	21117	3.173	0.315	0.766	0.275581
1271	ARL13B_KAN423-31_4.tif:0004-0083	3.016	979.845	156	2605	214.898	13.548	0.474	2955.39	113662	4.048	0.247	0.789	1.48331
1272	ARL13B_KAN423-31_4.tif:0005-0097	1.82	291.871	137	518	43.825	15.982	0.476	531.238	20431	2.811	0.356	0.733	0.266628
1273	ARL13B_KAN423-31_4.tif:0006-0101	2.262	735.609	113	1824	11.628	16.232	0.485	1664.05	63998	2.83	0.353	0.688	0.835186
1274	ARL13B_KAN423-31_4.tif:0007-0106	3.276	1339.1	223	3518	79.467	17.244	0.483	4387.14	168726	4.311	0.232	0.813	2.20191
1275	ARL13B_KAN423-31_4.tif:0008-0109	2.496	485.677	221	1433	148.704	17.563	0.482	1212.32	46625	3.905	0.256	0.774	0.608465
1276	ARL13B_KAN423-31_4.tif:0009-0127	3.38	696.477	226	1705	107.726	20.37	0.437	2354.23	90542	4.719	0.212	0.805	1.18159
1277	ARL13B_KAN423-31_4.tif:0010-0123	2.782	1058.47	220	2590	181.514	20.018	0.431	2944.83	113256	4.979	0.201	0.754	1.47801
1278	ARL13B_KAN423-31_4.tif:0011-0198	3.484	1446.98	224	3819	174.499	32.053	0.503	5041.57	193895	3.988	0.251	0.827	2.53037
1279	ARL13B_KAN423-31_4.tif:0012-0201	2.496	1028.55	220	2498	221.379	32.485	0.495	2567.42	98741	3.661	0.273	0.753	1.28859
1280	ARL13B_KAN423-31_4.tif:0013-0296	2.912	591.491	222	1339	39.449	47.937	0.446	1722.53	66247	3.915	0.255	0.704	0.864536
1281	ARL13B_KAN423-31_4.tif:0014-0465	2.808	393.481	184	713	30.066	74.798	0.425	1104.96	42496	1.827	0.547	0.598	0.554581
1282	ARL13B_KAN423-31_4.tif:0015-0468	2.366	1163.99	205	3102	186.659	75.464	0.493	2754.16	105923	4.205	0.238	0.835	1.38232
1283	ARL13B_KAN423-31_4.tif:0016-0463	2.964	948.149	210	2307	146.781	74.575	0.447	2810.48	108089	3.939	0.254	0.697	1.41058
1284	ARL13B_KAN423-31_4.tif:0017-0487	1.846	720.62	217	1536	217.92	78.475	0.441	1330.34	51164	4.585	0.218	0.821	0.6677
1285	ARL13B_KAN423-31_4.tif:0018-0563	2.366	696.165	234	1648	213.374	90.654	0.493	1647.22	63351	3.653	0.274	0.692	0.826743
1286	ARL13B_KAN423-31_4.tif:0019-0561	2.704	1315.97	244	3790	141.401	90.599	0.51	3558.6	136861	4.067	0.246	0.822	1.78606
1287	ARL13B_KAN423-31_4.tif:0020-0614	4.004	730.916	189	2030	118.683	98.958	0.405	2926.76	112561	4.681	0.214	0.726	1.46894
1288	ARL13B_KAN423-31_4.tif:0021-0620	4.394	1167.75	19	3281	189.511	99.872	0.46	5131.41	197350	3.274	0.305	0.712	2.57546
1289	ARL13B_KAN423-31_4.tif:0022-0739	3.276	376.571	222	674	146.685	119.224	0.376	1233.72	47448	5.639	0.177	0.748	0.619206
1290	ARL13B_KAN423-31_4.tif:0023-0802	2.704	923.337	216	2229	78.239	129.386	0.529	2496.85	96027	3.284	0.305	0.762	1.25317
1291	ARL13B_KAN423-31_4.tif:0024-0810	2.366	1342.89	222	3767	124.461	130.612	0.515	3177.47	122203	3.755	0.266	0.749	1.59477
1292	ARL13B_KAN423-31_4.tif:0025-0911	2.938	749.611	221	2197	219.628	146.782	0.562	2202.49	84706	2.82	0.355	0.766	1.10543
1293	ARL13B_KAN423-31_4.tif:0026-0909	2.652	512.039	218	1023	14.792	146.483	0.583	1358.01	52228	3.089	0.324	0.829	0.681585
1294	ARL13B_KAN423-31_4.tif:0027-0983	3.172	614.566	184	1330	182.52	158.465	0.363	1949.52	74977	6.32	0.158	0.824	0.978464
1295	ARL13B_KAN423-31_4.tif:0028-1012	0.936	848.5	119	2304	129.685	163.001	0.539	794.244	30546	2.327	0.43	0.75	0.398631
1296	ARL13B_KAN423-31_4.tif:0029-1017	2.262	910.644	206	2404	150.836	163.912	0.49	2060	79226	4.341	0.23	0.791	1.03391
1297	ARL13B_KAN423-31_5.tif:0001-0043	2.6	937.36	222	2419	194.264	6.792	0.415	2437.28	93736	5.179	0.193	0.758	1.22327
1298	ARL13B_KAN423-31_5.tif:0002-0119	3.38	1482.73	234	3649	7.972	19.25	0.436	5011.93	192755	5.005	0.2	0.82	2.51549
1299	ARL13B_KAN423-31_5.tif:0003-0272	2.756	824.783	222	2310	194.455	43.989	0.384	2273.24	87427	5.635	0.177	0.736	1.14094
1300	ARL13B_KAN423-31_5.tif:0004-0286	2.366	1022.54	227	3213	100.947	46.269	0.545	2419.47	93051	3.437	0.291	0.802	1.21433
1301	ARL13B_KAN423-31_5.tif:0005-0382	3.718	1531.45	99	3802	57.285	61.942	0.416	5694.29	218998	2.902	0.345	0.704	2.85797
1302	ARL13B_KAN423-31_5.tif:0006-0393	3.614	1234.7	220	3379	4.104	63.433	0.56	4462.49	171624	3.324	0.301	0.822	2.23973
1303	ARL13B_KAN423-31_5.tif:0007-0415	3.328	1461.93	226	3817	100.483	66.93	0.56	4865.6	187127	3.548	0.282	0.826	2.44204
1304	ARL13B_KAN423-31_5.tif:0008-0669	3.302	1278.65	170	3409	142.581	107.643	0.378	4222.37	162389	4.53	0.221	0.656	2.11921
1305	ARL13B_KAN423-31_5.tif:0009-0677	2.522	975.361	229	2491	20.656	109.31	0.536	2460.01	94610	3.468	0.288	0.815	1.23468
1306	ARL13B_KAN423-31_5.tif:0010-0759	2.158	711.711	230	1828	99.863	122.565	0.383	1535.96	59072	4.757	0.21	0.664	0.770901
1307	ARL13B_KAN423-31_5.tif:0011-0769	2.444	1436.55	224	3842	166.323	123.977	0.492	3511.15	135036	4.221	0.237	0.752	1.76225
1308	ARL13B_KAN423-31_5.tif:0012-0811	0.884	349.382	172	623	169.768	130.807	0.453	308.873	11879	4.44	0.225	0.701	0.155023
1309	ARL13B_KAN423-31_5.tif:0013-0821	2.028	660.167	221	1495	66.222	132.395	0.395	1338.9	51493	4.949	0.202	0.719	0.671994
1310	ARL13B_KAN423-31_5.tif:0014-0890	1.95	756.347	235	1678	84.468	143.662	0.399	1474.96	56726	5.246	0.191	0.794	0.740285
1311	ARL13B_KAN423-31_5.tif:0015-0918	2.054	1016.11	220	2511	70.357	148.084	0.517	2087.22	80273	3.743	0.267	0.832	1.04758
1312	ARL13B_KAN423-31_5.tif:0016-1027	1.118	340.233	195	630	220.386	165.478	0.251	380.403	14630	7.427	0.135	0.606	0.190924
1313	ARL13B_KAN423-31_6.tif:0001-0021	2.73	1031.23	139	3022	11.87	3.525	0.529	2815.42	108279	3.456	0.289	0.739	1.41306
1314	ARL13B_KAN423-31_6.tif:0002-0031	3.848	1173.76	224	3095	135.851	5.212	0.5	4516.89	173716	3.817	0.262	0.829	2.26703
1315	ARL13B_KAN423-31_6.tif:0003-0059	2.938	836.115	221	3562	111.295	9.479	0.472	2456.65	94481	4.434	0.226	0.766	1.233
1316	ARL13B_KAN423-31_6.tif:0004-0088	3.094	626.975	221	1421	48.105	14.267	0.407	1939.98	74610	5.289	0.189	0.775	0.973675
1317	ARL13B_KAN423-31_6.tif:0005-0116	3.302	551.63	221	1152	188.892	18.801	0.559	1821.59	70057	3.093	0.323	0.844	0.914257
1318	ARL13B_KAN423-31_6.tif:0006-0147	3.016	1167.22	214	3214	80.187	23.634	0.556	3520.53	135397	3.618	0.276	0.841	1.76696
1319	ARL13B_KAN423-31_6.tif:0007-0183	4.238	896.724	220	2862	55.474	29.412	0.361	3800.55	146166	5.674	0.176	0.756	1.90749
1320	ARL13B_KAN423-31_6.tif:0008-0197	2.184	1118.38	228	3124	4.072	31.954	0.538	2442.69	93944	3.393	0.295	0.792	1.22599
1321	ARL13B_KAN423-31_6.tif:0009-0206	3.51	954.393	225	2630	80.976	33.205	0.525	3350.12	128843	3.93	0.254	0.846	1.68143
1322	ARL13B_KAN423-31_6.tif:0010-0230	2.47	1301.26	233	3328	37.869	37.007	0.505	3214.31	123620	4.215	0.237	0.819	1.61326
1323	ARL13B_KAN423-31_6.tif:0011-0240	2.08	1014.3	177	2764	188.769	38.849	0.484	2109.87	81144	4.752	0.21	0.874	1.05894
1324	ARL13B_KAN423-31_6.tif:0012-0270	2.47	1150.32	22	3608	95.851	43.313	0.517	2841.45	109280	2.327	0.43	0.72	1.42613
1325	ARL13B_KAN423-31_6.tif:0013-0341	3.068	1394.72	220	3823	15.194	55.113	0.595	4279.26	164577	3.158	0.317	0.846	2.14776
1326	ARL13B_KAN423-31_6.tif:0014-0343	1.014	309	66	728	165.436	55.327	0.343	313.345	12051	4.593	0.218	0.578	0.157268
1327	ARL13B_KAN423-31_6.tif:0015-0355	5.278	817.044	229	2681	155.328	57.251	0.554	4312.62	165860	3.226	0.31	0.807	2.16451
1328	ARL13B_KAN423-31_6.tif:0016-0358	3.016	1510.49	220	3759	119.823	57.816	0.427	4555.92	175217	5.052	0.198	0.781	2.28662
1329	ARL13B_KAN423-31_6.tif:0017-0367	2.21	791.553	166	1664	107.082	59.159	0.491	1749.44	67282	3.943	0.254	0.776	0.878043
1330	ARL13B_KAN423-31_6.tif:0018-0394	2.34	913.089	224	2460	209.24	63.597	0.467	2136.76	82178	3.825	0.261	0.769	1.07244
1331	ARL13B_KAN423-31_6.tif:0019-0444	3.12	1024.52	223	2610	100.311	71.559	0.458	3196.68	122942	4.271	0.234	0.741	1.60442
1332	ARL13B_KAN423-31_6.tif:0020-0473	2.21	992.6	222	2764	159.384	76.295	0.499	2193.78	84371	4.372	0.229	0.821	1.10106
1333	ARL13B_KAN423-31_6.tif:0021-0484	2.496	506.271	112	1210	110.78	77.785	0.269	1263.73	48602	2.878	0.347	0.456	0.634265
1334	ARL13B_KAN423-31_6.tif:0022-0529	3.536	1433.48	221	3805	58.937	85.323	0.584	5069.08	194953	3.546	0.282	0.837	2.54417
1335	ARL13B_KAN423-31_6.tif:0023-0546	3.302	626.709	232	1192	87.041	88.07	0.564	2069.52	79592	3.39	0.295	0.861	1.03869
1336	ARL13B_KAN423-31_6.tif:0024-0586	2.262	738.264	130	2047	200.896	94.466	0.505	1670.06	64229	3.941	0.254	0.753	0.838201
1337	ARL13B_KAN423-31_6.tif:0025-0585	1.014	783.026	226	1591	149.018	94.395	0.574	794.036	30538	3.519	0.284	0.736	0.398527
1338	ARL13B_KAN423-31_6.tif:0026-0695	3.016	1083.75	244	2588	197.862	112.141	0.468	3268.79	125715	4.753	0.21	0.838	1.64061
1339	ARL13B_KAN423-31_6.tif:0027-0710	2.964	735.386	221	1778	126.416	114.514	0.336	2179.82	83834	5.983	0.167	0.675	1.09405
1340	ARL13B_KAN423-31_6.tif:0028-0766	3.068	1587.31	230	3807	55.577	123.59	0.521	4870.17	187303	3.875	0.258	0.837	2.44434
1341	ARL13B_KAN423-31_6.tif:0029-0793	1.3	440	223	763	110.666	127.842	0.32	572.034	22000	6.298	0.159	0.641	0.287104
1342	ARL13B_KAN423-31_6.tif:0030-0816	2.106	1330.22	244	3569	19.208	131.549	0.533	2801.62	107748	3.86	0.259	0.802	1.40613
1343	ARL13B_KAN423-31_6.tif:0031-0877	3.198	1208.81	221	3810	126.725	141.431	0.4	3865.99	148683	5.265	0.19	0.762	1.94034
1344	ARL13B_KAN423-31_6.tif:0032-0910	3.068	977.568	221	2728	164.26	146.68	0.397	2999.36	115353	4.909	0.204	0.735	1.50538
										95522.2				1.24658
1345	ARL13B_KAN423-32_1.tif:0001-0043	5.642	541.194	223	950	141.771	7.179	0.569	3053.6	117439	3.067	0.326	0.838	1.5326
1346	ARL13B_KAN423-32_1.tif:0002-0063	3.042	1610.19	221	3795	215.796	10.139	0.51	4898.49	188392	3.586	0.279	0.804	2.45855
1347	ARL13B_KAN423-32_1.tif:0003-0091	9.751	902.227	0	3038	131.678	14.49	0.331	8797.24	338335	1.276	0.784	0.638	4.41534
1348	ARL13B_KAN423-32_1.tif:0004-0133	3.016	584.81	192	1410	198.755	21.701	0.339	1763.89	67838	4.026	0.248	0.615	0.885299
1349	ARL13B_KAN423-32_1.tif:0005-0212	3.536	867.897	229	2004	126.472	34.043	0.495	3069.07	118034	3.928	0.255	0.819	1.54037
1350	ARL13B_KAN423-32_1.tif:0006-0235	3.9	1168.32	220	3007	7.124	38.002	0.537	4556.72	175248	3.961	0.252	0.857	2.28702
1351	ARL13B_KAN423-32_1.tif:0007-0247	5.2	1428.84	7	3795	88.344	39.811	0.448	7430.39	285767	4.433	0.226	0.78	3.72931
1352	ARL13B_KAN423-32_1.tif:0008-0306	2.964	1562.77	91	3748	107.451	49.334	0.564	4632.34	178156	3.608	0.277	0.891	2.32497
1353	ARL13B_KAN423-32_1.tif:0009-0381	4.888	682.468	220	2320	159.774	61.494	0.424	3336.11	128304	5.108	0.196	0.837	1.67439
1354	ARL13B_KAN423-32_1.tif:0010-0475	4.68	1656.86	0	3822	60.81	76.576	0.522	7754.55	298234	3.644	0.274	0.764	3.89201
1355	ARL13B_KAN423-32_1.tif:0011-0512	2.522	1046.12	223	3306	222.471	82.458	0.428	2638.48	101474	4.937	0.203	0.789	1.32426
1356	ARL13B_KAN423-32_1.tif:0012-0547	4.654	729.883	222	1448	14.909	88.087	0.428	3397.08	130649	3.829	0.261	0.708	1.70499
1357	ARL13B_KAN423-32_1.tif:0013-0583	3.172	1373.41	223	3772	17.107	93.948	0.568	4356.72	167556	3.244	0.308	0.838	2.18664
1358	ARL13B_KAN423-32_1.tif:0014-0635	3.432	1577.56	198	3774	105.306	102.316	0.451	5414.51	208238	3.324	0.301	0.725	2.71755
1359	ARL13B_KAN423-32_1.tif:0015-0659	2.808	474.509	224	1016	166.625	106.162	0.557	1332.5	51247	3.416	0.293	0.837	0.668783
1360	ARL13B_KAN423-32_1.tif:0016-0687	3.172	760.713	232	1924	199.836	110.771	0.403	2413.13	92807	4.802	0.208	0.713	1.21115
1361	ARL13B_KAN423-32_1.tif:0017-0693	3.354	410.233	181	813	97.576	111.719	0.555	1376	52920	3.609	0.277	0.887	0.690616
1362	ARL13B_KAN423-32_1.tif:0018-0717	2.574	1375.23	224	3211	141.327	115.826	0.504	3540.06	136148	3.932	0.254	0.783	1.77676
1363	ARL13B_KAN423-32_1.tif:0019-0743	2.704	1007.38	221	2241	186.755	119.882	0.457	2724.11	104767	4.426	0.226	0.803	1.36723
1364	ARL13B_KAN423-32_1.tif:0020-0762	3.744	1688.04	221	3846	68.023	123.028	0.486	6320.41	243078	3.799	0.263	0.787	3.17221
1365	ARL13B_KAN423-32_1.tif:0021-0815	2.132	1129.6	225	2682	82.397	131.397	0.552	2408.45	92627	3.613	0.277	0.845	1.2088
1366	ARL13B_KAN423-32_1.tif:0022-0876	2.73	1575.42	222	3819	27.808	141.214	0.568	4301.15	165419	3.62	0.276	0.827	2.15875
1367	ARL13B_KAN423-32_1.tif:0023-0875	2.574	1270.83	229	3507	116.29	141.176	0.518	3271.31	125812	4.147	0.241	0.825	1.64187
1368	ARL13B_KAN423-32_1.tif:0024-0902	3.9	498.72	224	1012	139.288	145.464	0.555	1945.12	74808	3.183	0.314	0.85	0.976259
1369	ARL13B_KAN423-32_1.tif:0025-0923	2.6	1489.43	234	3760	131.164	148.879	0.502	3872.75	148943	4.18	0.239	0.83	1.94373
1370	ARL13B_KAN423-32_1.tif:0026-0969	2.522	779.124	220	1818	62.162	156.121	0.337	1965.07	75575	5.765	0.173	0.678	0.986268
1371	ARL13B_KAN423-32_2.tif:0001-0203	2.86	824.036	223	2276	183.831	32.869	0.567	2356.89	90644	3.065	0.326	0.777	1.18292
1372	ARL13B_KAN423-32_2.tif:0002-0217	3.796	845.322	228	2302	52.635	34.818	0.545	3209.03	123417	3.231	0.31	0.844	1.61062
1373	ARL13B_KAN423-32_2.tif:0003-0228	2.834	1422.01	224	3768	77.019	36.852	0.524	4030.22	154999	3.963	0.252	0.832	2.02277
1374	ARL13B_KAN423-32_2.tif:0004-0306	3.978	1242.28	220	3013	211.329	49.441	0.594	4942.07	190068	3.1	0.323	0.838	2.48042
1375	ARL13B_KAN423-32_2.tif:0005-0372	2.834	1155.47	222	3100	44.161	60.017	0.596	3274.79	125946	3.265	0.306	0.855	1.64362
1376	ARL13B_KAN423-32_2.tif:0006-0385	3.25	909.256	128	3160	200.366	62.06	0.515	2955.26	113657	3.909	0.256	0.833	1.48325
1377	ARL13B_KAN423-32_2.tif:0007-0419	6.5	895.736	221	1866	96.862	67.567	0.512	5822.64	223934	3.882	0.258	0.87	2.92238
1378	ARL13B_KAN423-32_2.tif:0008-0480	2.678	962.534	223	2626	66.559	77.64	0.441	2577.82	99141	3.643	0.275	0.694	1.29381
1379	ARL13B_KAN423-32_2.tif:0009-0493	3.562	1158.77	222	2790	183.257	79.477	0.509	4127.77	158751	3.56	0.281	0.799	2.07173
1380	ARL13B_KAN423-32_2.tif:0010-0503	4.732	850.165	99	1950	101.605	81.16	0.562	4023.22	154730	3.712	0.269	0.924	2.01926
1381	ARL13B_KAN423-32_2.tif:0011-0585	2.964	1280.43	224	3673	176.222	94.302	0.574	3795.42	145969	3.325	0.301	0.806	1.90492
1382	ARL13B_KAN423-32_2.tif:0012-0624	3.9	1131.95	223	2647	210.647	100.672	0.44	4414.86	169792	4.887	0.205	0.86	2.21582
1383	ARL13B_KAN423-32_2.tif:0013-0647	5.018	740.829	77	2100	173.003	104.755	0.381	3717.7	142980	3.33	0.3	0.623	1.86592
1384	ARL13B_KAN423-32_2.tif:0014-0645	4.16	1487.4	109	3612	135.448	104.119	0.437	6187.96	237984	3.866	0.259	0.884	3.10574
1385	ARL13B_KAN423-32_2.tif:0015-0652	4.004	1024.6	230	3278	53.17	105.246	0.493	4102.73	157788	3.882	0.258	0.784	2.05916
1386	ARL13B_KAN423-32_2.tif:0016-0781	2.548	300.663	207	489	168.491	125.671	0.297	766.136	29465	5.053	0.198	0.546	0.384524
1387	ARL13B_KAN423-32_2.tif:0017-0787	3.146	1036.08	134	3309	90.844	127.05	0.404	3259.71	125366	4.403	0.227	0.747	1.63605
1388	ARL13B_KAN423-32_2.tif:0018-0828	3.51	404.281	206	940	109.089	133.596	0.379	1419.11	54578	5.694	0.176	0.67	0.712253
1389	ARL13B_KAN423-32_2.tif:0019-0864	3.51	540.541	118	1172	24.626	139.366	0.529	1897.41	72973	4.019	0.249	0.854	0.952312
1390	ARL13B_KAN423-32_2.tif:0020-0860	3.744	674.931	230	1380	154.223	138.694	0.571	2527.09	97190	3.496	0.286	0.883	1.26835
1391	ARL13B_KAN423-32_2.tif:0021-0880	2.236	606.093	225	1361	200.318	141.984	0.436	1355.31	52124	5.033	0.199	0.782	0.680228
1392	ARL13B_KAN423-32_2.tif:0022-0927	4.056	972.058	122	2561	79.327	149.223	0.3	3942.9	151641	4.907	0.204	0.618	1.97894
1393	ARL13B_KAN423-32_2.tif:0023-0953	4.108	1421.28	178	3546	69.481	153.662	0.482	5838.96	224562	3.294	0.304	0.769	2.93058
1394	ARL13B_KAN423-32_3.tif:0001-0030	5.85	510.893	175	1168	138.339	4.874	0.353	2988.91	114951	6.393	0.156	0.847	1.50013
1395	ARL13B_KAN423-32_3.tif:0002-0070	5.512	618.764	221	1272	159.593	11.375	0.445	3410.83	131178	4.179	0.239	0.743	1.7119
1396	ARL13B_KAN423-32_3.tif:0003-0177	3.77	947.448	234	2062	209.247	28.523	0.364	3572.09	137380	5.681	0.176	0.795	1.79284
1397	ARL13B_KAN423-32_3.tif:0004-0187	5.018	673.917	41	1725	118.067	30.164	0.435	3381.92	130066	2.911	0.343	0.692	1.69739
1398	ARL13B_KAN423-32_3.tif:0005-0238	4.472	649.593	83	1471	178.298	38.335	0.529	2905.16	111730	3.397	0.294	0.808	1.4581
1399	ARL13B_KAN423-32_3.tif:0006-0242	4.16	380.988	217	601	26.82	39.203	0.526	1585	60958	3.434	0.291	0.816	0.795514
1400	ARL13B_KAN423-32_3.tif:0007-0310	5.772	1082.96	77	2785	144.206	50.122	0.435	6251.22	240417	3.548	0.282	0.783	3.13749
1401	ARL13B_KAN423-32_3.tif:0008-0351	4.472	693.267	221	2606	118.493	56.624	0.572	3100.48	119242	3.529	0.283	0.809	1.55613
1402	ARL13B_KAN423-32_3.tif:0009-0465	2.184	743.405	122	1690	143.035	74.665	0.491	1623.69	62446	3.103	0.322	0.82	0.814932
1403	ARL13B_KAN423-32_3.tif:0010-0467	2.73	821.781	223	2575	76.912	75.418	0.552	2243.6	86287	3.076	0.325	0.781	1.12606
1404	ARL13B_KAN423-32_3.tif:0011-0490	5.46	926.195	221	2150	177.068	79.146	0.5	5057.33	194501	4.094	0.244	0.855	2.53828
1405	ARL13B_KAN423-32_3.tif:0012-0507	3.146	1265.36	232	3024	11.046	81.77	0.534	3981.05	153108	3.448	0.29	0.801	1.99809
1406	ARL13B_KAN423-32_3.tif:0013-0543	5.668	721.28	222	1388	31.132	87.595	0.526	4088.46	157239	3.76	0.266	0.862	2.052
1407	ARL13B_KAN423-32_3.tif:0014-0537	3.094	1098.62	224	3100	47.878	86.553	0.578	3399.34	130736	3.314	0.302	0.85	1.70613
1408	ARL13B_KAN423-32_3.tif:0015-0594	3.588	1028.77	220	2839	82.105	95.592	0.521	3691.44	141970	3.33	0.3	0.786	1.85274
1409	ARL13B_KAN423-32_3.tif:0016-0591	3.952	1419.8	229	3563	108.04	95.264	0.584	5611.37	215809	3.617	0.276	0.899	2.81635
1410	ARL13B_KAN423-32_3.tif:0017-0641	4.498	1545.86	222	3704	142.803	103.311	0.589	6953.7	267434	3.032	0.33	0.876	3.49007
1411	ARL13B_KAN423-32_3.tif:0018-0707	3.484	459.604	223	1085	37.551	113.947	0.493	1601.36	61587	4.034	0.248	0.805	0.803722
1412	ARL13B_KAN423-32_3.tif:0019-0709	3.744	744.097	215	1875	9.897	114.508	0.485	2786.07	107150	3.87	0.258	0.772	1.39833
1413	ARL13B_KAN423-32_3.tif:0020-0762	3.094	1045.81	220	2890	190.811	123.101	0.537	3235.92	124451	3.437	0.291	0.768	1.62411
1414	ARL13B_KAN423-32_3.tif:0021-0777	3.484	1204.86	226	3095	215.843	125.314	0.584	4197.98	161451	3.226	0.31	0.827	2.10697
1415	ARL13B_KAN423-32_3.tif:0022-0932	3.64	1061.12	227	2654	101.768	150.361	0.509	3862.72	148557	3.948	0.253	0.814	1.9387
1416	ARL13B_KAN423-32_3.tif:0023-0938	3.9	1192.49	220	3441	67.363	151.278	0.548	4651	178874	3.704	0.27	0.867	2.33434
1417	ARL13B_KAN423-32_3.tif:0024-0984	3.744	756.222	223	2259	77.372	158.784	0.477	2831.47	108896	4.278	0.234	0.845	1.42111
1418	ARL13B_KAN423-32_3.tif:0025-1002	4.914	714.339	206	1911	6.794	161.422	0.42	3510.47	135010	5.028	0.199	0.873	1.76191
1419	ARL13B_KAN423-32_3.tif:0026-1014	5.122	1068.88	221	2512	112.487	163.476	0.396	5475.15	210570	5.81	0.172	0.802	2.74798
1420	ARL13B_KAN423-32_4.tif:0001-0111	2.964	966.439	227	3065	192.663	17.945	0.445	2864.7	110174	4.705	0.213	0.77	1.43779
1421	ARL13B_KAN423-32_4.tif:0002-0193	3.432	1099.73	222	3153	218.33	31.151	0.572	3774.52	145165	3.558	0.281	0.868	1.89443
1422	ARL13B_KAN423-32_4.tif:0003-0200	4.134	876.874	119	2059	148.712	32.232	0.525	3625.22	139423	3.542	0.282	0.805	1.8195
1423	ARL13B_KAN423-32_4.tif:0004-0203	3.328	997.414	223	2402	203.014	32.731	0.424	3319.59	127669	4.4	0.227	0.711	1.66611
1424	ARL13B_KAN423-32_4.tif:0005-0271	3.536	906.162	19	2135	135.16	43.296	0.509	3204.38	123238	2.15	0.465	0.725	1.60828
1425	ARL13B_KAN423-32_4.tif:0006-0337	5.876	1190.77	196	3066	97.618	54.523	0.503	6997.39	269114	3.659	0.273	0.803	3.51199
1426	ARL13B_KAN423-32_4.tif:0007-0329	3.354	294.884	198	452	196.548	53.164	0.557	989.1	38040	2.448	0.408	0.777	0.496429
1427	ARL13B_KAN423-32_4.tif:0008-0350	3.12	1566.54	227	3714	109.356	56.467	0.537	4887.9	187985	4.025	0.248	0.803	2.45324
1428	ARL13B_KAN423-32_4.tif:0009-0442	4.394	894.751	225	2793	83.949	71.269	0.537	3931.78	151213	3.669	0.273	0.86	1.97336
1429	ARL13B_KAN423-32_4.tif:0010-0446	2.366	354.198	221	636	22.262	72.083	0.523	838.082	32232	3.752	0.267	0.788	0.420634
1430	ARL13B_KAN423-32_4.tif:0011-0534	4.55	1246.64	229	3528	160.423	86.18	0.48	5672.55	218162	4.227	0.237	0.806	2.84706
1431	ARL13B_KAN423-32_4.tif:0012-0555	3.302	700.008	221	2409	206.051	89.517	0.521	2311.57	88901	3.573	0.28	0.819	1.16018
1432	ARL13B_KAN423-32_4.tif:0013-0663	4.628	1672.78	115	3815	134.836	107.063	0.368	7742.1	297755	5.109	0.196	0.743	3.88576
1433	ARL13B_KAN423-32_4.tif:0014-0667	3.354	1560.49	221	3800	127.031	107.637	0.56	5234.19	201303	4.017	0.249	0.89	2.62704
1434	ARL13B_KAN423-32_4.tif:0015-0684	3.952	1452.84	84	3794	78.984	110.348	0.363	5741.98	220832	2.496	0.401	0.589	2.8819
1435	ARL13B_KAN423-32_4.tif:0016-0710	2.808	1150.31	226	2438	204.363	114.582	0.549	3230.25	124233	3.405	0.294	0.803	1.62126
1436	ARL13B_KAN423-32_4.tif:0017-0797	5.018	1055.19	223	2694	106.05	128.667	0.561	5295.27	203652	3.662	0.273	0.856	2.6577
1437	ARL13B_KAN423-32_4.tif:0018-0912	4.524	1273.58	61	3625	104.232	147.353	0.4	5762.02	221603	4.537	0.22	0.763	2.89196
1438	ARL13B_KAN423-32_4.tif:0019-0931	5.434	1180.8	222	3032	115.83	150.099	0.413	6416.87	246788	5.112	0.196	0.816	3.22063
1439	ARL13B_KAN423-32_4.tif:0020-0943	3.666	974.745	227	3238	98.775	152.174	0.557	3573.63	137439	3.574	0.28	0.884	1.79361
1440	ARL13B_KAN423-32_4.tif:0021-1008	1.95	843.733	244	1689	29.269	162.436	0.555	1645.38	63280	3.178	0.315	0.758	0.825816
1441	ARL13B_KAN423-32_4.tif:0022-1019	5.044	1089.11	206	2832	149.506	164.39	0.337	5493.79	211287	5.149	0.194	0.69	2.75734
1442	ARL13B_KAN423-32_4.tif:0023-1022	3.016	978.957	152	2351	56.325	164.896	0.488	2952.71	113559	3.953	0.253	0.806	1.48197
1443	ARL13B_KAN423-32_5.tif:0001-0020	4.654	1101.66	137	2801	170.467	3.063	0.362	5127.43	197197	5.059	0.198	0.654	2.57346
1444	ARL13B_KAN423-32_5.tif:0002-0026	3.484	490.164	205	1268	119.822	4.408	0.571	1707.84	65682	3.038	0.329	0.851	0.857163
1445	ARL13B_KAN423-32_5.tif:0003-0086	3.406	954.031	38	2887	96.449	13.856	0.542	3249.62	124978	2.582	0.387	0.764	1.63099
1446	ARL13B_KAN423-32_5.tif:0004-0103	3.848	880.77	220	2185	62.405	16.767	0.551	3389.41	130354	3.733	0.268	0.831	1.70114
1447	ARL13B_KAN423-32_5.tif:0005-0144	3.51	1336.56	132	3697	139.378	23.282	0.448	4691.59	180435	4.917	0.203	0.846	2.35471
1448	ARL13B_KAN423-32_5.tif:0006-0173	4.472	1146.9	221	3009	36.995	27.94	0.476	5129.25	197267	4.099	0.244	0.837	2.57437
1449	ARL13B_KAN423-32_5.tif:0007-0207	2.886	1189.9	221	3160	193.765	33.356	0.433	3434.26	132079	4.614	0.217	0.747	1.72366
1450	ARL13B_KAN423-32_5.tif:0008-0225	2.132	1407.54	220	3416	185.815	36.295	0.593	3001.05	115418	3.36	0.298	0.85	1.50623
1451	ARL13B_KAN423-32_5.tif:0009-0230	4.186	1495.78	220	3792	69.954	37.192	0.565	6261.7	240820	3.166	0.316	0.83	3.14275
1452	ARL13B_KAN423-32_5.tif:0010-0268	5.174	1194.57	226	3220	41.952	43.311	0.38	6181.07	237719	5.087	0.197	0.732	3.10228
1453	ARL13B_KAN423-32_5.tif:0011-0281	4.16	1085.66	34	3209	152.886	44.933	0.335	4516.63	173706	4.104	0.244	0.612	2.2669
1454	ARL13B_KAN423-32_5.tif:0012-0288	3.146	1638.5	228	3783	111.107	46.557	0.593	5155.02	198258	3.365	0.297	0.858	2.58731
1455	ARL13B_KAN423-32_5.tif:0013-0307	3.458	1153.43	221	3045	71.951	49.727	0.529	3988.8	153406	3.644	0.274	0.792	2.00198
1456	ARL13B_KAN423-32_5.tif:0014-0349	3.536	1567.12	0	3788	126.86	56.746	0.359	5541.69	213129	3.931	0.254	0.705	2.78137
1457	ARL13B_KAN423-32_5.tif:0015-0516	3.952	526.743	139	993	206.462	83.028	0.593	2081.82	80065	2.709	0.369	0.774	1.04486
1458	ARL13B_KAN423-32_5.tif:0016-0515	4.238	1207.94	177	3611	134.73	82.932	0.419	5119.58	196895	4.654	0.215	0.738	2.56952
1459	ARL13B_KAN423-32_5.tif:0017-0552	4.16	1223.06	0	3704	49.582	88.656	0.469	5088.25	195690	2.264	0.442	0.682	2.55379
1460	ARL13B_KAN423-32_5.tif:0018-0586	3.952	734.388	146	1671	209.676	94.576	0.335	2902.48	111627	7.067	0.141	0.907	1.45675
1461	ARL13B_KAN423-32_5.tif:0019-0642	3.328	1120.86	145	2539	11.939	103.448	0.424	3730.45	143470	4.812	0.208	0.764	1.87231
1462	ARL13B_KAN423-32_5.tif:0020-0668	3.978	1945.18	114	3797	116.739	107.814	0.503	7738.4	297613	4.166	0.24	0.85	3.88391
1463	ARL13B_KAN423-32_5.tif:0021-0677	3.224	1813.96	222	3818	73.694	109.251	0.591	5848.56	224931	3.159	0.317	0.835	2.93539
1464	ARL13B_KAN423-32_5.tif:0022-0674	2.08	803.663	201	2069	134.94	108.636	0.44	1671.72	64293	4.533	0.221	0.769	0.839036
1465	ARL13B_KAN423-32_5.tif:0023-0697	3.25	1499.27	227	3359	181.166	112.449	0.447	4872.93	187409	4.74	0.211	0.781	2.44572
1466	ARL13B_KAN423-32_5.tif:0024-0736	2.626	559.832	223	1226	212.851	118.59	0.273	1470.21	56543	7.578	0.132	0.658	0.737897
1467	ARL13B_KAN423-32_5.tif:0025-0793	3.406	1162.91	130	2723	55.979	127.735	0.419	3961.11	152341	4.703	0.213	0.697	1.98808
1468	ARL13B_KAN423-32_5.tif:0026-0801	2.47	1172.89	224	3596	75.705	129.296	0.514	2897.22	111425	3.854	0.26	0.76	1.45412
1469	ARL13B_KAN423-32_5.tif:0027-0819	2.99	1302.12	223	3483	63.528	132.048	0.468	3893.58	149744	4.493	0.223	0.767	1.95419
1470	ARL13B_KAN423-32_5.tif:0028-0859	2.99	1288.48	222	3201	195.548	138.629	0.588	3852.78	148175	3.453	0.29	0.895	1.93371
1471	ARL13B_KAN423-32_5.tif:0029-0878	3.25	1334.74	221	3789	52.897	141.73	0.466	4338.18	166843	4.613	0.217	0.814	2.17733
1472	ARL13B_KAN423-32_5.tif:0030-0917	2.86	1236.05	232	3570	126.83	148.039	0.424	3535.3	135965	4.535	0.22	0.775	1.77437
1473	ARL13B_KAN423-32_5.tif:0031-0991	2.392	1402.21	223	3669	27.604	159.794	0.58	3354.28	129003	3.346	0.299	0.844	1.68351
1474	ARL13B_KAN423-32_6.tif:0001-0030	3.276	1431.33	66	3665	107.803	4.804	0.579	4689.3	180347	3.057	0.327	0.81	2.35356
1475	ARL13B_KAN423-32_6.tif:0002-0039	3.38	752.685	219	1813	214.279	6.199	0.299	2544.23	97849	6.219	0.161	0.714	1.27695
1476	ARL13B_KAN423-32_6.tif:0003-0043	3.354	925.45	224	2197	207.133	6.948	0.514	3104.14	119383	4.342	0.23	0.931	1.55797
1477	ARL13B_KAN423-32_6.tif:0004-0107	3.614	1030.68	228	2657	158.915	17.153	0.525	3725.11	143265	3.612	0.277	0.848	1.86964
1478	ARL13B_KAN423-32_6.tif:0005-0156	3.172	721.738	0	1404	74.527	24.932	0.598	2289.49	88052	2.577	0.388	0.808	1.1491
1479	ARL13B_KAN423-32_6.tif:0006-0180	3.666	1196.08	220	3602	101.004	29.083	0.559	4385.09	168647	3.628	0.276	0.868	2.20088
1480	ARL13B_KAN423-32_6.tif:0007-0200	4.29	1372.99	133	3613	140.921	32.54	0.54	5890.5	226544	2.438	0.41	0.737	2.95644
1481	ARL13B_KAN423-32_6.tif:0008-0221	11.285	613.749	0	2231	51.076	35.423	0.296	6925.96	266367	3.785	0.264	0.581	3.47614
1482	ARL13B_KAN423-32_6.tif:0009-0234	1.404	547.296	156	1322	139.105	37.583	0.529	768.45	29554	2.714	0.368	0.72	0.385685
1483	ARL13B_KAN423-32_6.tif:0010-0254	4.81	604.708	224	1167	11.366	41.03	0.577	2908.82	111871	3.652	0.274	0.885	1.45994
1484	ARL13B_KAN423-32_6.tif:0011-0277	5.278	1257.47	0	3626	92.914	44.691	0.471	6637.34	255267	2.16	0.463	0.668	3.33128
1485	ARL13B_KAN423-32_6.tif:0012-0306	3.354	1169.5	221	3402	192.944	49.552	0.501	3922.73	150865	3.737	0.268	0.816	1.96882
1486	ARL13B_KAN423-32_6.tif:0013-0309	4.68	1284.41	0	3775	101.314	49.712	0.507	6011.38	231193	2.789	0.359	0.783	3.01711
1487	ARL13B_KAN423-32_6.tif:0014-0467	5.304	817.917	222	2226	174.154	75.542	0.396	4338.49	166855	5.297	0.189	0.829	2.17749
1488	ARL13B_KAN423-32_6.tif:0015-0477	3.692	1189.69	153	3763	144.521	76.986	0.454	4392.6	168936	3.402	0.294	0.763	2.20465
1489	ARL13B_KAN423-32_6.tif:0016-0528	8.503	1048.64	0	3183	42.566	85.58	0.304	8916.07	342905	3.78	0.265	0.602	4.47498
1490	ARL13B_KAN423-32_6.tif:0017-0542	4.212	1164.66	199	3137	175.558	87.61	0.439	4905.85	188675	4.412	0.227	0.762	2.46225
1491	ARL13B_KAN423-32_6.tif:0018-0567	3.016	1292.8	222	2981	222.818	91.484	0.58	3899.32	149965	3.598	0.278	0.947	1.95707
1492	ARL13B_KAN423-32_6.tif:0019-0596	4.316	729.084	220	1694	14.418	95.923	0.383	3146.92	121028	4.46	0.224	0.671	1.57944
1493	ARL13B_KAN423-32_6.tif:0020-0663	3.718	762.986	27	2644	99.082	106.985	0.446	2836.95	109107	3.718	0.269	0.792	1.42387
1494	ARL13B_KAN423-32_6.tif:0021-0678	3.822	701.048	215	1695	47.564	109.278	0.483	2679.57	103054	3.635	0.275	0.828	1.34487
1495	ARL13B_KAN423-32_6.tif:0022-0726	3.51	1405.65	0	3764	175.633	117.01	0.465	4934.14	189763	3.469	0.288	0.789	2.47644
1496	ARL13B_KAN423-32_6.tif:0023-0751	3.952	1515.68	232	3799	84.37	121.238	0.533	5990.35	230384	3.385	0.295	0.776	3.00656
1497	ARL13B_KAN423-32_6.tif:0024-0771	4.186	1300.49	105	3325	75.067	124.155	0.502	5444.18	209379	3.37	0.297	0.863	2.73244
1498	ARL13B_KAN423-32_6.tif:0025-0848	4.29	1288.44	224	3074	40.044	136.827	0.571	5527.75	212593	3.529	0.283	0.887	2.77438
1499	ARL13B_KAN423-32_6.tif:0026-1024	3.146	1474.81	221	3774	162.873	165.147	0.501	4640.03	178452	4.2	0.238	0.837	2.32883
										152796				1.99401
1500	ARL13B_KAN423-33_1.tif:0001-0033	5.148	721.606	220	1300	83.684	5.305	0.578	3715.05	142878	3.138	0.319	0.843	1.86459
1501	ARL13B_KAN423-33_1.tif:0002-0054	2.938	416.398	222	752	73.011	8.675	0.519	1223.45	47053	3.397	0.294	0.837	0.614051
1502	ARL13B_KAN423-33_1.tif:0003-0109	3.224	677.105	154	2435	113.796	17.747	0.552	2183.12	83961	2.985	0.335	0.816	1.09571
1503	ARL13B_KAN423-33_1.tif:0004-0150	1.456	533.071	221	992	196.702	24.248	0.587	776.199	29852	3.108	0.322	0.778	0.389574
1504	ARL13B_KAN423-33_1.tif:0005-0253	2.236	1089.04	185	3112	124.376	40.911	0.555	2435.23	93657	3.612	0.277	0.851	1.22224
1505	ARL13B_KAN423-33_1.tif:0006-0291	3.666	526.979	119	1211	192.588	47.057	0.424	1932.02	74304	5.17	0.193	0.82	0.969682
1506	ARL13B_KAN423-33_1.tif:0007-0315	0.988	330.289	221	489	74.612	50.658	0.294	326.346	12551	6.323	0.158	0.555	0.163793
[truncated: 1,473 more rows]

## Sheet: Replicate3_KAN437
	Label	Area	Mean	Min	Max	X	Y	Circ	IntDen	RawIntDen	AR	Round	Solidity
[truncated: 1,596 more rows]

[truncated: 4 more sheets: IF condition, Statistics for Fig.3S1A (24 h), Statistics for Fig.3S1B (48 h), Statistics for Fig.3S1C (72 h)]
