# Supplementary material for: Myristoylated Neuronal Calcium Sensor-1 captures the preciliary vesicle at distal appendages
Source: eLife. 2025 Jan 30;14:e85998. doi: 10.7554/eLife.85998 (PMC11984960; doi:10.7554/eLife.85998)
Supplement: Figure 3—source data 1. [file elife-85998-fig3-data1.xlsx]

## Sheet: Replicate1
Confluent		sgGFP				CEP89 KO				NCS1 KO				C3ORF14 KO
	Ciliated	cell counts	ARL13B+ Ac-Tub- dot		Ciliated	cell counts	ARL13B+ Ac-Tub- dot		Ciliated	cell counts	ARL13B+ Ac-Tub- dot		Ciliated	cell counts	ARL13B+ Ac-Tub- dot			hour	0	12	24	48	72	96
KAN368-1	2	37		KAN368-2	1	40		KAN368-5	0	36		KAN368-6	1	35				RPE-BFP-Cas9pMCB306(pool)	8.33333	44.4	78.6325	88.0658	77.6371	75
2	2	37	1	2	0	37		2	0	40		2	1	43				RPE-BFP-Cas9 CEP89KO#2 (pool)	0.398406	10.3448	39.4737	44.0191	50.2146	43.2432
3	4	34		3	0	51		3	0	35		3	2	44				RPE-BFP-Cas9 CEP89KO#3 (pool)	0	7.62712	46.6942	67.4897	39.726	43.0556
4	9	50	2	4	0	48		4	0	42		4	2	45				RPE-BFP-Cas9 CEP89KO#7 (pool)	0	12.253	38.7097	57.1429	55.2632	51.3514
5	2	49		5	0	31		5	0	41		5	4	38				RPE-BFP-Cas9 NCS1 KO (pool)	0	3.04348	30.8411	58.3333	59.2233	41.2322
6	1	33		6	0	44		6	0	37		6	4	40	1			RPE-BFP-Cas9 C3orf14KO (pool)	5.71429	33.7553	64.7303	87.2449	86.6379	81.4634
7				7				7				7
8				8				8				8
9				9				9				9
10				10				10				10
	20	240	3		1	251	0		0	231	0		14	245	1
		8.33333				0.398406				0				5.71429
12 hour		sgGFP				CEP89 KO				NCS1 KO				C3ORF14 KO
	Ciliated	cell counts	ARL13B+ Ac-Tub- dot		Ciliated	cell counts	ARL13B+ Ac-Tub- dot		Ciliated	cell counts	ARL13B+ Ac-Tub- dot		Ciliated	cell counts	ARL13B+ Ac-Tub- dot
KAN368-7	18	39		KAN368-8	1	39	1	KAN368-11	1	35	1	KAN368-12	21	47
2	17	39		2	13	57		2	1	35		2	15	36
3	13	39		3	2	47		3	1	33		3	22	47
4	26	53		4	4	57		4	3	50		4	7	40
5	19	42		5	7	42		5	1	40		5	10	32
6	18	38	2	6	3	48		6	0	37		6	5	35
7				7				7				7
8				8				8				8
9				9				9				9
10				10				10				10
	111	250	2		30	290	1		7	230	1		80	237	0
		44.4				10.3448				3.04348				33.7553
24 hour		sgGFP				CEP89 KO				NCS1 KO				C3ORF14 KO
	Ciliated	cell counts	ARL13B+ Ac-Tub- dot		Ciliated	cell counts	ARL13B+ Ac-Tub- dot		Ciliated	cell counts	ARL13B+ Ac-Tub- dot		Ciliated	cell counts	ARL13B+ Ac-Tub- dot
KAN368-13	29	31		KAN368-14	14	36		KAN368-17	7	34		KAN368-18	25	37
2	31	36		2	23	45		2	20	44		2	37	50
3	33	44		3	9	32		3	16	35		3	21	31
4	30	39		4	14	37		4	10	37		4	21	42
5	30	41		5	16	38		5	6	28	1	5	24	37
6	31	43		6	14	40		6	7	36		6	28	44
7				7				7				7
8				8				8				8
9				9				9				9
10				10				10				10
	184	234	0		90	228	0		66	214	1		156	241	0
		78.6325				39.4737				30.8411				64.7303
48 hour		sgGFP				CEP89 KO				NCS1 KO				C3ORF14 KO
	Ciliated	cell counts	ARL13B+ Ac-Tub- dot		Ciliated	cell counts	ARL13B+ Ac-Tub- dot		Ciliated	cell counts	ARL13B+ Ac-Tub- dot		Ciliated	cell counts	ARL13B+ Ac-Tub- dot
KAN368-19	39	46		KAN368-20	14	36		KAN368-23	32	47		KAN368-24	41	46
2	34	40		2	20	38	1	2	8	31		2	29	32
3	38	39		3	7	30		3	21	35		3	33	44
4	36	39		4	9	37		4	30	40		4	33	37
5	25	34		5	19	33		5	24	39		5	38	40
6	42	45		6	23	35		6	18	36		6	38	43
7				7				7				7
8				8				8				8
9				9				9				9
10				10				10				10
	214	243	0		92	209	1		133	228	0		171	196	0
		88.0658				44.0191				58.3333				87.2449
72 hour		sgGFP				CEP89 KO				NCS1 KO				C3ORF14 KO
	Ciliated	cell counts	ARL13B+ Ac-Tub- dot		Ciliated	cell counts	ARL13B+ Ac-Tub- dot		Ciliated	cell counts	ARL13B+ Ac-Tub- dot		Ciliated	cell counts
KAN368-25	33	46		KAN368-26	25	48		KAN368-29	31	42		KAN368-30	31	37
2	36	45		2	24	45		2	23	34		2	36	42
3	31	41		3				3	16	33		3	27	32
4	24	31		4	6	30		4	23	35		4	26	33
5	25	34		5	26	43		5	22	31		5	41	44
6	35	40		6	11	32		6	7	31		6	40	44
7				7	25	35		7				7
8				8				8				8
9				9				9				9
10				10				10				10
	184	237	0		117	233	0		122	206	0		201	232
		77.6371				50.2146				59.2233				86.6379
96 hour		sgGFP				CEP89 KO				NCS1 KO				C3ORF14 KO
	Ciliated	cell counts	ARL13B+ Ac-Tub- dot		Ciliated	cell counts	ARL13B+ Ac-Tub- dot		Ciliated	cell counts	ARL13B+ Ac-Tub- dot		Ciliated	cell counts	ARL13B+ Ac-Tub- dot
KAN368-31	25	37		KAN368-32	28	38		KAN368-35	5	31		KAN368-36	29	31
2	34	47		2	14	36		2	25	45		2	24	29
3	36	45		3	4	30		3	9	29		3	22	32
4	33	41		4	21	38		4	17	34		4	35	39
5	20	31		5	16	42		5	9	31		5	24	38
6	26	31		6	10	37		6	22	41		6	33	36
7				7	19	38		7				7
8				8				8				8
9				9				9				9
10				10				10				10
	174	232	0		112	259	0		87	211	0		167	205	0
		75				43.2432				41.2322				81.4634

## Sheet: Replicate2
Confluent		sgGFP				CEP89 KO				NCS1 KO				C3ORF14 KO						0	12	24	48	72	96
	Ciliated	cell counts	ARL13B+ Ac-Tub- dot		Ciliated	cell counts	ARL13B+ Ac-Tub- dot		Ciliated	cell counts	ARL13B+ Ac-Tub- dot		Ciliated	cell counts	ARL13B+ Ac-Tub- dot			RPE-BFP-Cas9 pMCB306 (pool)		5.7377	33.5616	77.5	87.8788	94.2308	89.0323
KAN416-2	1	17		KAN416-3	0	27		KAN416-4	0	19		KAN416-5	3	34				RPE-BFP-Cas9 CEP89KO (pool)		1.18343	7.1066	51.2953	68.7179	81.2785	67.4157
2	1	17		2	0	16		2	0	24		2	1	26	1			RPE-BFP-Cas9 NCS1KO (pool)		0	4.97512	37.3134	71.6578	77.2727	52.071
3	3	19	1	3	0	33		3	0	25		3	2	35				RPE-BFP-Cas9 C3orf14KO (pool)		5.61224	21.9388	74.2424	87.7193	93.9086	92
4	1	25		4	0	33		4	0	33		4	3	33
5	0	22	2	5	0	33		5	0	29		5	1	40	1
6	1	22		6	2	27		6	0	21		6	1	28	1
7				7				7				7
8				8				8				8
9				9				9				9
10				10				10				10
	7	122	3		2	169	0		0	151	0		11	196	3
		5.7377				1.18343				0				5.61224
12 hour		sgGFP				CEP89 KO				NCS1 KO				C3ORF14 KO
	Ciliated	cell counts	ARL13B+ Ac-Tub- dot		Ciliated	cell counts	ARL13B+ Ac-Tub- dot		Ciliated	cell counts	ARL13B+ Ac-Tub- dot		Ciliated	cell counts	ARL13B+ Ac-Tub- dot
KAN416-12	7	16		KAN416-13	1	31		KAN416-14	1	32		KAN416-15	15	35
2	7	30	1	2	3	33		2	0	35		2	6	28	2
3	13	29	1	3	3	37		3	1	31		3	8	35
4	5	21	1	4	4	29		4	0	36		4	4	29	1
5	10	25		5	0	35		5	3	35	1	5	6	36
6	7	25		6	3	32		6	5	32		6	4	33	2
7				7				7				7
8				8				8				8
9				9				9				9
10				10				10				10
	49	146	3		14	197	0		10	201	1		43	196	5
		33.5616				7.1066				4.97512				21.9388
24 hour		sgGFP				CEP89 KO				NCS1 KO				C3ORF14 KO
	Ciliated	cell counts	ARL13B+ Ac-Tub- dot		Ciliated	cell counts	ARL13B+ Ac-Tub- dot		Ciliated	cell counts	ARL13B+ Ac-Tub- dot		Ciliated	cell counts	ARL13B+ Ac-Tub- dot
KAN416-22	24	28		KAN416-23	19	30		KAN416-24	17	36		KAN416-25	19	29	1
2	19	24	1	2	17	31		2	9	30		2	23	29
3	19	26		3	19	33		3	16	43		3	22	28	1
4	21	25	1	4	18	37	1	4	14	31		4	32	40	1
5	22	27		5	14	30		5	8	30		5	27	40	1
6	19	30		6	12	32		6	11	31	1	6	24	32	1
7				7				7				7
8				8				8				8
9				9				9				9
10				10				10				10
	124	160	2		99	193	1		75	201	1		147	198	5
		77.5				51.2953				37.3134				74.2424
48 hour		sgGFP				CEP89 KO				NCS1 KO				C3ORF14 KO
	Ciliated	cell counts	ARL13B+ Ac-Tub- dot		Ciliated	cell counts	ARL13B+ Ac-Tub- dot		Ciliated	cell counts	ARL13B+ Ac-Tub- dot		Ciliated	cell counts	ARL13B+ Ac-Tub- dot
KAN416-32	20	27		KAN416-33	18	32	1	KAN416-34	10	20		KAN416-35	28	33	1
2	25	30	1	2	18	29		2	29	39		2	33	38	2
3	28	29		3	22	32	2	3	29	34		3	30	35
4	20	22		4	23	33		4	21	30		4	37	40
5	22	25		5	26	36	4	5	16	28	1	5	38	44	2
6	30	32		6	27	33		6	29	36		6	34	38
7				7				7				7
8				8				8				8
9				9				9				9
10				10				10				10
	145	165	1		134	195	7		134	187	1		200	228	5
		87.8788				68.7179				71.6578				87.7193
72 hour		sgGFP				CEP89 KO				NCS1 KO				C3ORF14 KO
	Ciliated	cell counts	ARL13B+ Ac-Tub- dot		Ciliated	cell counts	ARL13B+ Ac-Tub- dot		Ciliated	cell counts	ARL13B+ Ac-Tub- dot		Ciliated	cell counts	ARL13B+ Ac-Tub- dot
KAN416-42	28	29		KAN416-43	35	44		KAN416-44	24	32		KAN416-45	34	39	1
2	24	25	1	2	28	33		2	15	24		2	25	27
3	24	27		3	25	31		3	23	29		3	26	27
4	22	23		4	29	38		4	20	25		4	38	38
5	24	26	1	5	33	41		5	26	33		5	27	30
6	25	26		6	28	32		6	28	33		6	35	36
7				7				7				7
8				8				8				8
9				9				9				9
10				10				10				10
	147	156	2		178	219	0		136	176	0		185	197	1
		94.2308				81.2785				77.2727				93.9086
96 hour		sgGFP				CEP89 KO				NCS1 KO				C3ORF14 KO
	Ciliated	cell counts	ARL13B+ Ac-Tub- dot		Ciliated	cell counts	ARL13B+ Ac-Tub- dot		Ciliated	cell counts	ARL13B+ Ac-Tub- dot		Ciliated	cell counts	ARL13B+ Ac-Tub- dot
KAN416-52	20	22	1	KAN416-53	26	34	1	1	6	16		KAN416-55	32	35
2	23	26		2	17	26		2	11	25		2	25	29
3	23	28		3	14	27		3	18	29		3	40	43
4	23	25		4	22	33		4	15	26		4	28	29
5	22	26		5	20	27		5	18	32	1	5	25	26
6	27	28		6	21	31	1	6	20	41		6	34	38
7				7				7				7
8				8				8				8
9				9				9				9
10				10				10				10
	138	155	1		120	178	2		88	169	1		184	200	0
		89.0323				67.4157				52.071				92

## Sheet: Replicate3
Confluent		sgGFP				CEP89 KO				NCS1 KO				C3ORF14 KO						0	12	24	48	72	96
	Ciliated	cell counts	ARL13B+ Ac-Tub- dot		Ciliated	cell counts	ARL13B+ Ac-Tub- dot		Ciliated	cell counts	ARL13B+ Ac-Tub- dot		Ciliated	cell counts	ARL13B+ Ac-Tub- dot			RPE-BFP-Cas9 pMCB306 (pool)		7.27273	41.0714	85.7143	91.6667	94.3182	91.3043
KAN423-2	4	29		KAN423-3	1	39		KAN423-4	0	30		KAN423-5	2	41				RPE-BFP-Cas9 CEP89KO (pool)		0.546448	6.69856	43.318	78.1095	85.8974	77.0492
2	3	27		2	0	30		2	0	32	1	2	0	35				RPE-BFP-Cas9 NCS1KO (pool)		0	7.56303	52.4038	86.4979	90.3382	75.7848
3	0	27	1	3	0	26		3	0	29		3	1	37				RPE-BFP-Cas9 C3orf14KO (pool)		4.58716	23.6967	74.7664	94.5312	93.8272	92.9461
4	3	30		4	0	33		4	0	25	1	4	4	40
5	2	29	1	5	0	32		5	0	28		5	2	33
6	0	23	2	6	0	23	1	6	0	37		6	1	32
7				7				7				7
8				8				8				8
9				9				9				9
10				10				10				10
	12	165	4		1	183	1		0	181	2		10	218	0
		7.27273				0.546448				0				4.58716
12 hour		sgGFP				CEP89 KO				NCS1 KO				C3ORF14 KO
	Ciliated	cell counts	ARL13B+ Ac-Tub- dot		Ciliated	cell counts	ARL13B+ Ac-Tub- dot		Ciliated	cell counts	ARL13B+ Ac-Tub- dot		Ciliated	cell counts	ARL13B+ Ac-Tub- dot
KAN423-11	12	34		KAN423-12	2	35		KAN423-13	3	37		KAN423-14	18	44	3
2	16	38		2	3	35	3	2	2	41		2	5	28	1
3	27	41	1	3	4	36		3	4	35		3	2	38	2
4	9	31		4	0	33		4	3	40		4	7	34	1
5	17	36	1	5	1	36		5	3	44	2	5	6	30
6	11	44	2	6	4	34	3	6	3	41	2	6	12	37
7				7				7				7
8				8				8				8
9				9				9				9
10				10				10				10
	92	224	4		14	209	6		18	238	4		50	211	7
		41.0714				6.69856				7.56303				23.6967
24 hour		sgGFP				CEP89 KO				NCS1 KO				C3ORF14 KO
	Ciliated	cell counts	ARL13B+ Ac-Tub- dot		Ciliated	cell counts	ARL13B+ Ac-Tub- dot		Ciliated	cell counts	ARL13B+ Ac-Tub- dot		Ciliated	cell counts	ARL13B+ Ac-Tub- dot
KAN423-20	20	23		KAN423-21	11	30		KAN423-22	17	40		KAN423-23	30	38
2	29	38		2	15	38	1	2	22	33		2	29	35
3	26	32	1	3	16	37	3	3	15	32		3	27	34
4	29	30		4	19	37		4	17	38	1	4	27	41	2
5	21	26		5	16	38	2	5	20	33		5	26	34
6	37	40		6	17	37		6	18	32		6	21	32
7				7				7				7
8				8				8				8
9				9				9				9
10				10				10				10
	162	189	1		94	217	6		109	208	1		160	214	2
		85.7143				43.318				52.4038				74.7664
48 hour		sgGFP				CEP89 KO				NCS1 KO				C3ORF14 KO
	Ciliated	cell counts	ARL13B+ Ac-Tub- dot		Ciliated	cell counts	ARL13B+ Ac-Tub- dot		Ciliated	cell counts	ARL13B+ Ac-Tub- dot		Ciliated	cell counts	ARL13B+ Ac-Tub- dot
KAN423-29	32	34		KAN423-30	26	31		KAN423-31	31	36		KAN423-32	38	40
2	29	31		2	26	32		2	27	32		2	37	41
3	31	35		3	26	33		3	37	41		3	41	42
4	28	30	2	4	22	29		4	47	51		4	42	46
5	26	29		5	26	35		5	25	32		5	42	44
6	30	33	2	6	31	41		6	38	45		6	42	43
7				7				7				7
8				8				8				8
9				9				9				9
10				10				10				10
	176	192	4		157	201	0		205	237	0		242	256	0
		91.6667				78.1095				86.4979				94.5312
72 hour		sgGFP				CEP89 KO				NCS1 KO				C3ORF14 KO
	Ciliated	cell counts	ARL13B+ Ac-Tub- dot		Ciliated	cell counts	ARL13B+ Ac-Tub- dot		Ciliated	cell counts	ARL13B+ Ac-Tub- dot		Ciliated	cell counts	ARL13B+ Ac-Tub- dot
KAN423-38	26	29		KAN423-39	31	33		KAN423-40	19	22		KAN423-41	36	39
2	29	30		2	32	39	1	2	32	36		2	42	44
3	26	27		3	25	30		3	32	35		3	44	46
4	32	32		4	37	39		4	37	40		4	33	37
5	31	33		5	21	28	2	5	31	33		5	37	40
6	22	25		6	23	27		6	36	41		6	36	37
7				7	32	38		7				7
8				8				8				8
9				9				9				9
10				10				10				10
	166	176	0		201	234	3		187	207	0		228	243	0
		94.3182				85.8974				90.3382				93.8272
96 hour		sgGFP				CEP89 KO				NCS1 KO				C3ORF14 KO
	Ciliated	cell counts	ARL13B+ Ac-Tub- dot		Ciliated	cell counts	ARL13B+ Ac-Tub- dot		Ciliated	cell counts	ARL13B+ Ac-Tub- dot		Ciliated	cell counts	ARL13B+ Ac-Tub- dot
KAN423-47	27	28		KAN423-48	23	34		KAN423-49	26	37		KAN423-50	25	33
2	31	35		2	21	27		2	37	41		2	40	43
3	25	26		3	27	34		3	22	34		3	42	42
4	33	34		4	26	32		4	29	37		4	38	39
5	24	31		5	24	31		5	28	35		5	44	46
6	28	30		6	20	25		6	27	39		6	35	38
7				7				7				7
8				8				8				8
9				9				9				9
10				10				10				10
	168	184	0		141	183	0		169	223	0		224	241	0
		91.3043				77.0492				75.7848				92.9461

## Sheet: Replicate4
Confluent		sgGFP				CEP89 KO				NCS1 KO				C3ORF14 KO						0	12	24	48	72	96
	Ciliated	cell counts	ARL13B+ Ac-Tub- dot		Ciliated	cell counts	ARL13B+ Ac-Tub- dot		Ciliated	cell counts	ARL13B+ Ac-Tub- dot		Ciliated	cell counts	ARL13B+ Ac-Tub- dot			RPE-BFP-Cas9 pMCB306 (pool)		7.10059	37.4384	78.6458	84.5771
KAN437-2	2	22		KAN437-3	0	39		KAN437-4	0	34		KAN437-5	1	23				RPE-BFP-Cas9 CEP89KO (pool)		0	12.6506	48.2412	66.8293
2	1	27	1	2	0	32		2	0	29		2	2	27	1			RPE-BFP-Cas9 NCS1KO (pool)		0.510204	7.72947	43.8776	74.8744
3	2	27	1	3	0	36		3	0	33		3	1	26				RPE-BFP-Cas9 C3orf14KO (pool)		2.35294	27.1493	64.3192	90.1709
4	2	31	1	4	0	31		4	0	33		4	0	29	2
5	2	34	1	5	0	27	1	5	1	33		5	0	33
6	3	28		6	0	30	1	6	0	34		6	0	32
7				7				7				7
8				8				8				8
9				9				9				9
10				10				10				10
	12	169	4		0	195	2		1	196	0		4	170	3
		7.10059				0				0.510204				2.35294
12 hour		sgGFP				CEP89 KO				NCS1 KO				C3ORF14 KO
	Ciliated	cell counts	ARL13B+ Ac-Tub- dot		Ciliated	cell counts	ARL13B+ Ac-Tub- dot		Ciliated	cell counts	ARL13B+ Ac-Tub- dot		Ciliated	cell counts	ARL13B+ Ac-Tub- dot
KAN437-11	7	27	2	KAN437-12	4	32		KAN437-13	5	41	1	KAN437-14	9	37	2
2	20	35	2	2	5	32	2	2	0	29	1	2	10	36
3	10	37		3	2	29	3	3	3	34	2	3	11	33
4	10	33		4	2	4	0	4	3	31	1	4	7	35	1
5	17	40	1	5	5	32	1	5	0	33	1	5	13	41
6	12	31	1	6	3	37		6	5	39		6	10	39
7				7				7				7
8				8				8				8
9				9				9				9
10				10				10				10
	76	203	6		21	166	6		16	207	6		60	221	3
		37.4384				12.6506				7.72947				27.1493
24 hour		sgGFP				CEP89 KO				NCS1 KO				C3ORF14 KO
	Ciliated	cell counts	ARL13B+ Ac-Tub- dot		Ciliated	cell counts	ARL13B+ Ac-Tub- dot		Ciliated	cell counts	ARL13B+ Ac-Tub- dot		Ciliated	cell counts	ARL13B+ Ac-Tub- dot
KAN437-20	31	35		KAN437-21	27	41	1	KAN437-22	13	28		KAN437-23	26	39
2	25	30		2	13	27		2	16	31		2	19	29
3	22	32		3	23	42		3	13	36	2	3	22	36
4	25	29		4	13	25		4	20	39		4	22	39	3
5	22	29	3	5	12	32		5	14	34		5	28	38	2
6	26	37		6	8	32	3	6	10	28	2	6	20	32	4
7				7				7				7
8				8				8				8
9				9				9				9
10				10				10				10
	151	192	3		96	199	4		86	196	4		137	213	9
		78.6458				48.2412				43.8776				64.3192
48 hour		sgGFP				CEP89 KO				NCS1 KO				C3ORF14 KO
	Ciliated	cell counts	ARL13B+ Ac-Tub- dot		Ciliated	cell counts	ARL13B+ Ac-Tub- dot		Ciliated	cell counts	ARL13B+ Ac-Tub- dot		Ciliated	cell counts	ARL13B+ Ac-Tub- dot
KAN437-29	28	32		KAN437-30	27	36		KAN437-31	24	34		KAN437-32	41	45
2	24	28		2	11	26		2	30	38		2	35	40
3	27	34	1	3	15	29		3	23	32		3	34	38
4	32	35		4	26	34		4	30	38		4	32	35
5	29	35		5	28	37		5	18	26		5	35	39
6	30	37	2	6	30	43		6	24	31		6	34	37
7				7				7				7
8				8				8				8
9				9				9				9
10				10				10				10
	170	201	3		137	205	0		149	199	0		211	234	0
		84.5771				66.8293				74.8744				90.1709
72 hour		sgGFP				CEP89 KO				NCS1 KO				C3ORF14 KO

## Sheet: Total
hour		0	12	24	48	72	96
RPE-BFP-Cas9pMCB306(pool)	KAN368	8.33333	44.4	78.6325	88.0658	77.6371	75					Time after serum starvation	sgGFP (pMCB306)				CEP89 KO				NCS1 KO				C3ORF14 KO
	KAN416	5.7377	33.5616	77.5	87.8788	94.2308	89.0323					0	8.33333	5.7377	7.27273	7.10059	0.398406	1.18343	0.546448	0	0	0	0	0.510204	5.71429	5.61224	4.58716	2.35294
	KAN423	7.27273	41.0714	85.7143	91.6667	94.3182	91.3043					12	44.4	33.5616	41.0714	37.4384	10.3448	7.1066	6.69856	12.6506	3.04348	4.97512	7.56303	7.72947	33.7553	21.9388	23.6967	27.1493
	KAN437	7.10059	37.4384	78.6458	84.5771							24	78.6325	77.5	85.7143	78.6458	39.4737	51.2953	43.318	48.2412	30.8411	37.3134	52.4038	43.8776	64.7303	74.2424	74.7664	64.3192
RPE-BFP-Cas9 CEP89KO#2 (pool)	KAN368	0.398406	10.3448	39.4737	44.0191	50.2146	43.2432					48	88.0658	87.8788	91.6667	84.5771	44.0191	68.7179	78.1095	66.8293	58.3333	71.6578	86.4979	74.8744	87.2449	87.7193	94.5312	90.1709
	KAN416	1.18343	7.1066	51.2953	68.7179	81.2785	67.4157					72	77.6371	94.2308	94.3182		50.2146	81.2785	85.8974		59.2233	77.2727	90.3382		86.6379	93.9086	93.8272
	KAN423	0.546448	6.69856	43.318	78.1095	85.8974	77.0492					96	75	89.0323	91.3043		43.2432	67.4157	77.0492		41.2322	52.071	75.7848		81.4634	92	92.9461
	KAN437	0	12.6506	48.2412	66.8293
RPE-BFP-Cas9 NCS1 KO (pool)	KAN368	0	3.04348	30.8411	58.3333	59.2233	41.2322
	KAN416	0	4.97512	37.3134	71.6578	77.2727	52.071
	KAN423	0	7.56303	52.4038	86.4979	90.3382	75.7848
	KAN437	0.510204	7.72947	43.8776	74.8744
RPE-BFP-Cas9 C3orf14KO (pool)	KAN368	5.71429	33.7553	64.7303	87.2449	86.6379	81.4634
	KAN416	5.61224	21.9388	74.2424	87.7193	93.9086	92
	KAN423	4.58716	23.6967	74.7664	94.5312	93.8272	92.9461
	KAN437	2.35294	27.1493	64.3192	90.1709

## Sheet: IF condition
Exp. number	Cell line	Gene induced	Culture condition, fixation condition	rabbit-Alexa488	mouse IgG1-Alexa568	mouse IgG2b-Alexa647	Nuclear stain	Date	Replicate
Replicate1
KAN368-1	RPE-BFP-Cas9pMCB306(pool)	condluent	Fixed in 4% PFA/confluent	ARL13B, Proteintech, 17711-1-AP, 1:1000	CEP170, Invitrogen, 41-3200, 1:1000	Ac-Tub, 6B-11, SIGMA, 1:2000	DAPI
KAN368-2	RPE-BFP-Cas9 CEP89KO#2 (pool)	condluent	Fixed in 4% PFA/confluent	ARL13B, Proteintech, 17711-1-AP, 1:1000	CEP170, Invitrogen, 41-3200, 1:1000	Ac-Tub, 6B-11, SIGMA, 1:2000	DAPI
KAN368-5	RPE-BFP-Cas9 NCS1 KO (pool)	condluent	Fixed in 4% PFA/confluent	ARL13B, Proteintech, 17711-1-AP, 1:1000	CEP170, Invitrogen, 41-3200, 1:1000	Ac-Tub, 6B-11, SIGMA, 1:2000	DAPI
KAN368-6	RPE-BFP-Cas9 C3orf14KO (pool)	condluent	Fixed in 4% PFA/confluent	ARL13B, Proteintech, 17711-1-AP, 1:1000	CEP170, Invitrogen, 41-3200, 1:1000	Ac-Tub, 6B-11, SIGMA, 1:2000	DAPI
KAN368-7	RPE-BFP-Cas9pMCB306(pool)	12 h s.s.	Fixed in 4% PFA/serum starvation for 12 hours	ARL13B, Proteintech, 17711-1-AP, 1:1000	CEP170, Invitrogen, 41-3200, 1:1000	Ac-Tub, 6B-11, SIGMA, 1:2000	DAPI
KAN368-8	RPE-BFP-Cas9 CEP89KO#2 (pool)	12 h s.s.	Fixed in 4% PFA/serum starvation for 12 hours	ARL13B, Proteintech, 17711-1-AP, 1:1000	CEP170, Invitrogen, 41-3200, 1:1000	Ac-Tub, 6B-11, SIGMA, 1:2000	DAPI
KAN368-11	RPE-BFP-Cas9 NCS1 KO (pool)	12 h s.s.	Fixed in 4% PFA/serum starvation for 12 hours	ARL13B, Proteintech, 17711-1-AP, 1:1000	CEP170, Invitrogen, 41-3200, 1:1000	Ac-Tub, 6B-11, SIGMA, 1:2000	DAPI
KAN368-12	RPE-BFP-Cas9 C3orf14KO (pool)	12 h s.s.	Fixed in 4% PFA/serum starvation for 12 hours	ARL13B, Proteintech, 17711-1-AP, 1:1000	CEP170, Invitrogen, 41-3200, 1:1000	Ac-Tub, 6B-11, SIGMA, 1:2000	DAPI
KAN368-13	RPE-BFP-Cas9pMCB306(pool)	24h s.s.	Fixed in 4% PFA/serum starvation for 24 hours	ARL13B, Proteintech, 17711-1-AP, 1:1000	CEP170, Invitrogen, 41-3200, 1:1000	Ac-Tub, 6B-11, SIGMA, 1:2000	DAPI
KAN368-14	RPE-BFP-Cas9 CEP89KO#2 (pool)	24h s.s.	Fixed in 4% PFA/serum starvation for 24 hours	ARL13B, Proteintech, 17711-1-AP, 1:1000	CEP170, Invitrogen, 41-3200, 1:1000	Ac-Tub, 6B-11, SIGMA, 1:2000	DAPI
KAN368-17	RPE-BFP-Cas9 NCS1 KO (pool)	24h s.s.	Fixed in 4% PFA/serum starvation for 24 hours	ARL13B, Proteintech, 17711-1-AP, 1:1000	CEP170, Invitrogen, 41-3200, 1:1000	Ac-Tub, 6B-11, SIGMA, 1:2000	DAPI
KAN368-18	RPE-BFP-Cas9 C3orf14KO (pool)	24h s.s.	Fixed in 4% PFA/serum starvation for 24 hours	ARL13B, Proteintech, 17711-1-AP, 1:1000	CEP170, Invitrogen, 41-3200, 1:1000	Ac-Tub, 6B-11, SIGMA, 1:2000	DAPI
KAN368-19	RPE-BFP-Cas9pMCB306(pool)	48 h s.s.	Fixed in 4% PFA/serum starvation for 48 hours	ARL13B, Proteintech, 17711-1-AP, 1:1000	CEP170, Invitrogen, 41-3200, 1:1000	Ac-Tub, 6B-11, SIGMA, 1:2000	DAPI
KAN368-20	RPE-BFP-Cas9 CEP89KO#2 (pool)	48 h s.s.	Fixed in 4% PFA/serum starvation for 48 hours	ARL13B, Proteintech, 17711-1-AP, 1:1000	CEP170, Invitrogen, 41-3200, 1:1000	Ac-Tub, 6B-11, SIGMA, 1:2000	DAPI
KAN368-23	RPE-BFP-Cas9 NCS1 KO (pool)	48 h s.s.	Fixed in 4% PFA/serum starvation for 48 hours	ARL13B, Proteintech, 17711-1-AP, 1:1000	CEP170, Invitrogen, 41-3200, 1:1000	Ac-Tub, 6B-11, SIGMA, 1:2000	DAPI
KAN368-24	RPE-BFP-Cas9 C3orf14KO (pool)	48 h s.s.	Fixed in 4% PFA/serum starvation for 48 hours	ARL13B, Proteintech, 17711-1-AP, 1:1000	CEP170, Invitrogen, 41-3200, 1:1000	Ac-Tub, 6B-11, SIGMA, 1:2000	DAPI
KAN368-25	RPE-BFP-Cas9pMCB306(pool)	72 h s.s.	Fixed in 4% PFA/serum starvation for 72 hours	ARL13B, Proteintech, 17711-1-AP, 1:1000	CEP170, Invitrogen, 41-3200, 1:1000	Ac-Tub, 6B-11, SIGMA, 1:2000	DAPI
KAN368-26	RPE-BFP-Cas9 CEP89KO#2 (pool)	72 h s.s.	Fixed in 4% PFA/serum starvation for 72 hours	ARL13B, Proteintech, 17711-1-AP, 1:1000	CEP170, Invitrogen, 41-3200, 1:1000	Ac-Tub, 6B-11, SIGMA, 1:2000	DAPI
KAN368-29	RPE-BFP-Cas9 NCS1 KO (pool)	72 h s.s.	Fixed in 4% PFA/serum starvation for 72 hours	ARL13B, Proteintech, 17711-1-AP, 1:1000	CEP170, Invitrogen, 41-3200, 1:1000	Ac-Tub, 6B-11, SIGMA, 1:2000	DAPI
KAN368-30	RPE-BFP-Cas9 C3orf14KO (pool)	72 h s.s.	Fixed in 4% PFA/serum starvation for 72 hours	ARL13B, Proteintech, 17711-1-AP, 1:1000	CEP170, Invitrogen, 41-3200, 1:1000	Ac-Tub, 6B-11, SIGMA, 1:2000	DAPI
KAN368-31	RPE-BFP-Cas9pMCB306(pool)	96 h s.s.	Fixed in 4% PFA/serum starvation for 96 hours	ARL13B, Proteintech, 17711-1-AP, 1:1000	CEP170, Invitrogen, 41-3200, 1:1000	Ac-Tub, 6B-11, SIGMA, 1:2000	DAPI
KAN368-32	RPE-BFP-Cas9 CEP89KO#2 (pool)	96 h s.s.	Fixed in 4% PFA/serum starvation for 96 hours	ARL13B, Proteintech, 17711-1-AP, 1:1000	CEP170, Invitrogen, 41-3200, 1:1000	Ac-Tub, 6B-11, SIGMA, 1:2000	DAPI
KAN368-35	RPE-BFP-Cas9 NCS1 KO (pool)	96 h s.s.	Fixed in 4% PFA/serum starvation for 96 hours	ARL13B, Proteintech, 17711-1-AP, 1:1000	CEP170, Invitrogen, 41-3200, 1:1000	Ac-Tub, 6B-11, SIGMA, 1:2000	DAPI
KAN368-36	RPE-BFP-Cas9 C3orf14KO (pool)	96 h s.s.	Fixed in 4% PFA/serum starvation for 96 hours	ARL13B, Proteintech, 17711-1-AP, 1:1000	CEP170, Invitrogen, 41-3200, 1:1000	Ac-Tub, 6B-11, SIGMA, 1:2000	DAPI
Replicate2
KAN416-2	RPE-BFP-Cas9 pMCB306 (pool)		Confluent, Fixed in 4% PFA	ARL13B, Proteintech, 17711-1-AP, 1:1000	CEP170, Invitrogen, 41-3200, 1:1000	Ac-Tub, 6B-11, SIGMA, 1:2000	DAPI	2018-12-10	No.1
KAN416-3	RPE-BFP-Cas9 CEP89KO (pool)		Confluent, Fixed in 4% PFA	ARL13B, Proteintech, 17711-1-AP, 1:1000	CEP170, Invitrogen, 41-3200, 1:1000	Ac-Tub, 6B-11, SIGMA, 1:2000	DAPI	2018-12-10	No.1
KAN416-4	RPE-BFP-Cas9 NCS1KO (pool)		Confluent, Fixed in 4% PFA	ARL13B, Proteintech, 17711-1-AP, 1:1000	CEP170, Invitrogen, 41-3200, 1:1000	Ac-Tub, 6B-11, SIGMA, 1:2000	DAPI	2018-12-10	No.1
KAN416-5	RPE-BFP-Cas9 C3orf14KO (pool)		Confluent, Fixed in 4% PFA	ARL13B, Proteintech, 17711-1-AP, 1:1000	CEP170, Invitrogen, 41-3200, 1:1000	Ac-Tub, 6B-11, SIGMA, 1:2000	DAPI	2018-12-10	No.1
KAN416-12	RPE-BFP-Cas9 pMCB306 (pool)		Fixed in 4% PFA, 12 hour serum starvation	ARL13B, Proteintech, 17711-1-AP, 1:1000	CEP170, Invitrogen, 41-3200, 1:1000	Ac-Tub, 6B-11, SIGMA, 1:2000	DAPI	2018-12-10	No.1
KAN416-13	RPE-BFP-Cas9 CEP89KO (pool)		Fixed in 4% PFA, 12 hour serum starvation	ARL13B, Proteintech, 17711-1-AP, 1:1000	CEP170, Invitrogen, 41-3200, 1:1000	Ac-Tub, 6B-11, SIGMA, 1:2000	DAPI	2018-12-10	No.1
KAN416-14	RPE-BFP-Cas9 NCS1KO (pool)		Fixed in 4% PFA, 12 hour serum starvation	ARL13B, Proteintech, 17711-1-AP, 1:1000	CEP170, Invitrogen, 41-3200, 1:1000	Ac-Tub, 6B-11, SIGMA, 1:2000	DAPI	2018-12-10	No.1
KAN416-15	RPE-BFP-Cas9 C3orf14KO (pool)		Fixed in 4% PFA, 12 hour serum starvation	ARL13B, Proteintech, 17711-1-AP, 1:1000	CEP170, Invitrogen, 41-3200, 1:1000	Ac-Tub, 6B-11, SIGMA, 1:2000	DAPI	2018-12-10	No.1
KAN416-22	RPE-BFP-Cas9 pMCB306 (pool)		Fixed in 4% PFA, 24 hour serum starvation	ARL13B, Proteintech, 17711-1-AP, 1:1000	CEP170, Invitrogen, 41-3200, 1:1000	Ac-Tub, 6B-11, SIGMA, 1:2000	DAPI	2018-12-10	No.1
KAN416-23	RPE-BFP-Cas9 CEP89KO (pool)		Fixed in 4% PFA, 24 hour serum starvation	ARL13B, Proteintech, 17711-1-AP, 1:1000	CEP170, Invitrogen, 41-3200, 1:1000	Ac-Tub, 6B-11, SIGMA, 1:2000	DAPI	2018-12-10	No.1
KAN416-24	RPE-BFP-Cas9 NCS1KO (pool)		Fixed in 4% PFA, 24 hour serum starvation	ARL13B, Proteintech, 17711-1-AP, 1:1000	CEP170, Invitrogen, 41-3200, 1:1000	Ac-Tub, 6B-11, SIGMA, 1:2000	DAPI	2018-12-10	No.1
KAN416-25	RPE-BFP-Cas9 C3orf14KO (pool)		Fixed in 4% PFA, 24 hour serum starvation	ARL13B, Proteintech, 17711-1-AP, 1:1000	CEP170, Invitrogen, 41-3200, 1:1000	Ac-Tub, 6B-11, SIGMA, 1:2000	DAPI	2018-12-10	No.1
KAN416-32	RPE-BFP-Cas9 pMCB306 (pool)		Fixed in 4% PFA, 48 hour serum starvation	ARL13B, Proteintech, 17711-1-AP, 1:1000	CEP170, Invitrogen, 41-3200, 1:1000	Ac-Tub, 6B-11, SIGMA, 1:2000	DAPI	2018-12-10	No.1
KAN416-33	RPE-BFP-Cas9 CEP89KO (pool)		Fixed in 4% PFA, 48 hour serum starvation	ARL13B, Proteintech, 17711-1-AP, 1:1000	CEP170, Invitrogen, 41-3200, 1:1000	Ac-Tub, 6B-11, SIGMA, 1:2000	DAPI	2018-12-10	No.1
KAN416-34	RPE-BFP-Cas9 NCS1KO (pool)		Fixed in 4% PFA, 48 hour serum starvation	ARL13B, Proteintech, 17711-1-AP, 1:1000	CEP170, Invitrogen, 41-3200, 1:1000	Ac-Tub, 6B-11, SIGMA, 1:2000	DAPI	2018-12-10	No.1
KAN416-35	RPE-BFP-Cas9 C3orf14KO (pool)		Fixed in 4% PFA, 48 hour serum starvation	ARL13B, Proteintech, 17711-1-AP, 1:1000	CEP170, Invitrogen, 41-3200, 1:1000	Ac-Tub, 6B-11, SIGMA, 1:2000	DAPI	2018-12-10	No.1
KAN416-42	RPE-BFP-Cas9 pMCB306 (pool)		Fixed in 4% PFA, 72 hour serum starvation	ARL13B, Proteintech, 17711-1-AP, 1:1000	CEP170, Invitrogen, 41-3200, 1:1000	Ac-Tub, 6B-11, SIGMA, 1:2000	DAPI	2018-12-10	No.1
KAN416-43	RPE-BFP-Cas9 CEP89KO (pool)		Fixed in 4% PFA, 72 hour serum starvation	ARL13B, Proteintech, 17711-1-AP, 1:1000	CEP170, Invitrogen, 41-3200, 1:1000	Ac-Tub, 6B-11, SIGMA, 1:2000	DAPI	2018-12-10	No.1
KAN416-44	RPE-BFP-Cas9 NCS1KO (pool)		Fixed in 4% PFA, 72 hour serum starvation	ARL13B, Proteintech, 17711-1-AP, 1:1000	CEP170, Invitrogen, 41-3200, 1:1000	Ac-Tub, 6B-11, SIGMA, 1:2000	DAPI	2018-12-10	No.1
KAN416-45	RPE-BFP-Cas9 C3orf14KO (pool)		Fixed in 4% PFA, 72 hour serum starvation	ARL13B, Proteintech, 17711-1-AP, 1:1000	CEP170, Invitrogen, 41-3200, 1:1000	Ac-Tub, 6B-11, SIGMA, 1:2000	DAPI	2018-12-10	No.1
KAN416-52	RPE-BFP-Cas9 pMCB306 (pool)		Fixed in 4% PFA, 96 hour serum starvation	ARL13B, Proteintech, 17711-1-AP, 1:1000	CEP170, Invitrogen, 41-3200, 1:1000	Ac-Tub, 6B-11, SIGMA, 1:2000	DAPI	2018-12-10	No.1
KAN416-53	RPE-BFP-Cas9 CEP89KO (pool)		Fixed in 4% PFA, 96 hour serum starvation	ARL13B, Proteintech, 17711-1-AP, 1:1000	CEP170, Invitrogen, 41-3200, 1:1000	Ac-Tub, 6B-11, SIGMA, 1:2000	DAPI	2018-12-10	No.1
KAN416-54	RPE-BFP-Cas9 NCS1KO (pool)		Fixed in 4% PFA, 96 hour serum starvation	ARL13B, Proteintech, 17711-1-AP, 1:1000	CEP170, Invitrogen, 41-3200, 1:1000	Ac-Tub, 6B-11, SIGMA, 1:2000	DAPI	2018-12-10	No.1
KAN416-55	RPE-BFP-Cas9 C3orf14KO (pool)		Fixed in 4% PFA, 96 hour serum starvation	ARL13B, Proteintech, 17711-1-AP, 1:1000	CEP170, Invitrogen, 41-3200, 1:1000	Ac-Tub, 6B-11, SIGMA, 1:2000	DAPI	2018-12-10	No.1
Replicate3
KAN423-2	RPE-BFP-Cas9 pMCB306 (pool)		Confluent, Fixed in 4% PFA	ARL13B, Proteintech, 17711-1-AP, 1:1000	CEP170, Invitrogen, 41-3200, 1:1000	Ac-Tub, 6B-11, SIGMA, 1:2000	DAPI	2018-12-19	No.2
KAN423-3	RPE-BFP-Cas9 CEP89KO (pool)		Confluent, Fixed in 4% PFA	ARL13B, Proteintech, 17711-1-AP, 1:1000	CEP170, Invitrogen, 41-3200, 1:1000	Ac-Tub, 6B-11, SIGMA, 1:2000	DAPI	2018-12-19	No.2
KAN423-4	RPE-BFP-Cas9 NCS1KO (pool)		Confluent, Fixed in 4% PFA	ARL13B, Proteintech, 17711-1-AP, 1:1000	CEP170, Invitrogen, 41-3200, 1:1000	Ac-Tub, 6B-11, SIGMA, 1:2000	DAPI	2018-12-19	No.2
KAN423-5	RPE-BFP-Cas9 C3orf14KO (pool)		Confluent, Fixed in 4% PFA	ARL13B, Proteintech, 17711-1-AP, 1:1000	CEP170, Invitrogen, 41-3200, 1:1000	Ac-Tub, 6B-11, SIGMA, 1:2000	DAPI	2018-12-19	No.2
KAN423-11	RPE-BFP-Cas9 pMCB306 (pool)		Fixed in 4% PFA, 12 hour serum starvation	ARL13B, Proteintech, 17711-1-AP, 1:1000	CEP170, Invitrogen, 41-3200, 1:1000	Ac-Tub, 6B-11, SIGMA, 1:2000	DAPI	2018-12-19	No.2
KAN423-12	RPE-BFP-Cas9 CEP89KO (pool)		Fixed in 4% PFA, 12 hour serum starvation	ARL13B, Proteintech, 17711-1-AP, 1:1000	CEP170, Invitrogen, 41-3200, 1:1000	Ac-Tub, 6B-11, SIGMA, 1:2000	DAPI	2018-12-19	No.2
KAN423-13	RPE-BFP-Cas9 NCS1KO (pool)		Fixed in 4% PFA, 12 hour serum starvation	ARL13B, Proteintech, 17711-1-AP, 1:1000	CEP170, Invitrogen, 41-3200, 1:1000	Ac-Tub, 6B-11, SIGMA, 1:2000	DAPI	2018-12-19	No.2
KAN423-14	RPE-BFP-Cas9 C3orf14KO (pool)		Fixed in 4% PFA, 12 hour serum starvation	ARL13B, Proteintech, 17711-1-AP, 1:1000	CEP170, Invitrogen, 41-3200, 1:1000	Ac-Tub, 6B-11, SIGMA, 1:2000	DAPI	2018-12-19	No.2
KAN423-20	RPE-BFP-Cas9 pMCB306 (pool)		Fixed in 4% PFA, 24 hour serum starvation	ARL13B, Proteintech, 17711-1-AP, 1:1000	CEP170, Invitrogen, 41-3200, 1:1000	Ac-Tub, 6B-11, SIGMA, 1:2000	DAPI	2018-12-19	No.2
KAN423-21	RPE-BFP-Cas9 CEP89KO (pool)		Fixed in 4% PFA, 24 hour serum starvation	ARL13B, Proteintech, 17711-1-AP, 1:1000	CEP170, Invitrogen, 41-3200, 1:1000	Ac-Tub, 6B-11, SIGMA, 1:2000	DAPI	2018-12-19	No.2
KAN423-22	RPE-BFP-Cas9 NCS1KO (pool)		Fixed in 4% PFA, 24 hour serum starvation	ARL13B, Proteintech, 17711-1-AP, 1:1000	CEP170, Invitrogen, 41-3200, 1:1000	Ac-Tub, 6B-11, SIGMA, 1:2000	DAPI	2018-12-19	No.2
KAN423-23	RPE-BFP-Cas9 C3orf14KO (pool)		Fixed in 4% PFA, 24 hour serum starvation	ARL13B, Proteintech, 17711-1-AP, 1:1000	CEP170, Invitrogen, 41-3200, 1:1000	Ac-Tub, 6B-11, SIGMA, 1:2000	DAPI	2018-12-19	No.2
KAN423-29	RPE-BFP-Cas9 pMCB306 (pool)		Fixed in 4% PFA, 48 hour serum starvation	ARL13B, Proteintech, 17711-1-AP, 1:1000	CEP170, Invitrogen, 41-3200, 1:1000	Ac-Tub, 6B-11, SIGMA, 1:2000	DAPI	2018-12-19	No.2
KAN423-30	RPE-BFP-Cas9 CEP89KO (pool)		Fixed in 4% PFA, 48 hour serum starvation	ARL13B, Proteintech, 17711-1-AP, 1:1000	CEP170, Invitrogen, 41-3200, 1:1000	Ac-Tub, 6B-11, SIGMA, 1:2000	DAPI	2018-12-19	No.2
KAN423-31	RPE-BFP-Cas9 NCS1KO (pool)		Fixed in 4% PFA, 48 hour serum starvation	ARL13B, Proteintech, 17711-1-AP, 1:1000	CEP170, Invitrogen, 41-3200, 1:1000	Ac-Tub, 6B-11, SIGMA, 1:2000	DAPI	2018-12-19	No.2
KAN423-32	RPE-BFP-Cas9 C3orf14KO (pool)		Fixed in 4% PFA, 48 hour serum starvation	ARL13B, Proteintech, 17711-1-AP, 1:1000	CEP170, Invitrogen, 41-3200, 1:1000	Ac-Tub, 6B-11, SIGMA, 1:2000	DAPI	2018-12-19	No.2
KAN423-38	RPE-BFP-Cas9 pMCB306 (pool)		Fixed in 4% PFA, 72 hour serum starvation	ARL13B, Proteintech, 17711-1-AP, 1:1000	CEP170, Invitrogen, 41-3200, 1:1000	Ac-Tub, 6B-11, SIGMA, 1:2000	DAPI	2018-12-19	No.2
KAN423-39	RPE-BFP-Cas9 CEP89KO (pool)		Fixed in 4% PFA, 72 hour serum starvation	ARL13B, Proteintech, 17711-1-AP, 1:1000	CEP170, Invitrogen, 41-3200, 1:1000	Ac-Tub, 6B-11, SIGMA, 1:2000	DAPI	2018-12-19	No.2
KAN423-40	RPE-BFP-Cas9 NCS1KO (pool)		Fixed in 4% PFA, 72 hour serum starvation	ARL13B, Proteintech, 17711-1-AP, 1:1000	CEP170, Invitrogen, 41-3200, 1:1000	Ac-Tub, 6B-11, SIGMA, 1:2000	DAPI	2018-12-19	No.2
KAN423-41	RPE-BFP-Cas9 C3orf14KO (pool)		Fixed in 4% PFA, 72 hour serum starvation	ARL13B, Proteintech, 17711-1-AP, 1:1000	CEP170, Invitrogen, 41-3200, 1:1000	Ac-Tub, 6B-11, SIGMA, 1:2000	DAPI	2018-12-19	No.2
KAN423-47	RPE-BFP-Cas9 pMCB306 (pool)		Fixed in 4% PFA, 96 hour serum starvation	ARL13B, Proteintech, 17711-1-AP, 1:1000	CEP170, Invitrogen, 41-3200, 1:1000	Ac-Tub, 6B-11, SIGMA, 1:2000	DAPI	2018-12-19	No.2
KAN423-48	RPE-BFP-Cas9 CEP89KO (pool)		Fixed in 4% PFA, 96 hour serum starvation	ARL13B, Proteintech, 17711-1-AP, 1:1000	CEP170, Invitrogen, 41-3200, 1:1000	Ac-Tub, 6B-11, SIGMA, 1:2000	DAPI	2018-12-19	No.2
KAN423-49	RPE-BFP-Cas9 NCS1KO (pool)		Fixed in 4% PFA, 96 hour serum starvation	ARL13B, Proteintech, 17711-1-AP, 1:1000	CEP170, Invitrogen, 41-3200, 1:1000	Ac-Tub, 6B-11, SIGMA, 1:2000	DAPI	2018-12-19	No.2
KAN423-50	RPE-BFP-Cas9 C3orf14KO (pool)		Fixed in 4% PFA, 96 hour serum starvation	ARL13B, Proteintech, 17711-1-AP, 1:1000	CEP170, Invitrogen, 41-3200, 1:1000	Ac-Tub, 6B-11, SIGMA, 1:2000	DAPI	2018-12-19	No.2
Replicate4
KAN437-2	RPE-BFP-Cas9 pMCB306 (pool)		Confluent, Fixed in 4% PFA	ARL13B, Proteintech, 17711-1-AP, 1:1000	CEP170, Invitrogen, 41-3200, 1:1000	Ac-Tub, 6B-11, SIGMA, 1:2000	DAPI	2019-01-28	No.3
KAN437-3	RPE-BFP-Cas9 CEP89KO (pool)		Confluent, Fixed in 4% PFA	ARL13B, Proteintech, 17711-1-AP, 1:1000	CEP170, Invitrogen, 41-3200, 1:1000	Ac-Tub, 6B-11, SIGMA, 1:2000	DAPI	2019-01-28	No.3
KAN437-4	RPE-BFP-Cas9 NCS1KO (pool)		Confluent, Fixed in 4% PFA	ARL13B, Proteintech, 17711-1-AP, 1:1000	CEP170, Invitrogen, 41-3200, 1:1000	Ac-Tub, 6B-11, SIGMA, 1:2000	DAPI	2019-01-28	No.3
KAN437-5	RPE-BFP-Cas9 C3orf14KO (pool)		Confluent, Fixed in 4% PFA	ARL13B, Proteintech, 17711-1-AP, 1:1000	CEP170, Invitrogen, 41-3200, 1:1000	Ac-Tub, 6B-11, SIGMA, 1:2000	DAPI	2019-01-28	No.3
KAN437-11	RPE-BFP-Cas9 pMCB306 (pool)		Fixed in 4% PFA, 12 hour serum starvation	ARL13B, Proteintech, 17711-1-AP, 1:1000	CEP170, Invitrogen, 41-3200, 1:1000	Ac-Tub, 6B-11, SIGMA, 1:2000	DAPI	2019-01-28	No.3
KAN437-12	RPE-BFP-Cas9 CEP89KO (pool)		Fixed in 4% PFA, 12 hour serum starvation	ARL13B, Proteintech, 17711-1-AP, 1:1000	CEP170, Invitrogen, 41-3200, 1:1000	Ac-Tub, 6B-11, SIGMA, 1:2000	DAPI	2019-01-28	No.3
KAN437-13	RPE-BFP-Cas9 NCS1KO (pool)		Fixed in 4% PFA, 12 hour serum starvation	ARL13B, Proteintech, 17711-1-AP, 1:1000	CEP170, Invitrogen, 41-3200, 1:1000	Ac-Tub, 6B-11, SIGMA, 1:2000	DAPI	2019-01-28	No.3
KAN437-14	RPE-BFP-Cas9 C3orf14KO (pool)		Fixed in 4% PFA, 12 hour serum starvation	ARL13B, Proteintech, 17711-1-AP, 1:1000	CEP170, Invitrogen, 41-3200, 1:1000	Ac-Tub, 6B-11, SIGMA, 1:2000	DAPI	2019-01-28	No.3
KAN437-20	RPE-BFP-Cas9 pMCB306 (pool)		Fixed in 4% PFA, 24 hour serum starvation	ARL13B, Proteintech, 17711-1-AP, 1:1000	CEP170, Invitrogen, 41-3200, 1:1000	Ac-Tub, 6B-11, SIGMA, 1:2000	DAPI	2019-01-28	No.3
KAN437-21	RPE-BFP-Cas9 CEP89KO (pool)		Fixed in 4% PFA, 24 hour serum starvation	ARL13B, Proteintech, 17711-1-AP, 1:1000	CEP170, Invitrogen, 41-3200, 1:1000	Ac-Tub, 6B-11, SIGMA, 1:2000	DAPI	2019-01-28	No.3
KAN437-22	RPE-BFP-Cas9 NCS1KO (pool)		Fixed in 4% PFA, 24 hour serum starvation	ARL13B, Proteintech, 17711-1-AP, 1:1000	CEP170, Invitrogen, 41-3200, 1:1000	Ac-Tub, 6B-11, SIGMA, 1:2000	DAPI	2019-01-28	No.3
KAN437-23	RPE-BFP-Cas9 C3orf14KO (pool)		Fixed in 4% PFA, 24 hour serum starvation	ARL13B, Proteintech, 17711-1-AP, 1:1000	CEP170, Invitrogen, 41-3200, 1:1000	Ac-Tub, 6B-11, SIGMA, 1:2000	DAPI	2019-01-28	No.3
KAN437-29	RPE-BFP-Cas9 pMCB306 (pool)		Fixed in 4% PFA, 48 hour serum starvation	ARL13B, Proteintech, 17711-1-AP, 1:1000	CEP170, Invitrogen, 41-3200, 1:1000	Ac-Tub, 6B-11, SIGMA, 1:2000	DAPI	2019-01-28	No.3
KAN437-30	RPE-BFP-Cas9 CEP89KO (pool)		Fixed in 4% PFA, 48 hour serum starvation	ARL13B, Proteintech, 17711-1-AP, 1:1000	CEP170, Invitrogen, 41-3200, 1:1000	Ac-Tub, 6B-11, SIGMA, 1:2000	DAPI	2019-01-28	No.3
KAN437-31	RPE-BFP-Cas9 NCS1KO (pool)		Fixed in 4% PFA, 48 hour serum starvation	ARL13B, Proteintech, 17711-1-AP, 1:1000	CEP170, Invitrogen, 41-3200, 1:1000	Ac-Tub, 6B-11, SIGMA, 1:2000	DAPI	2019-01-28	No.3
KAN437-32	RPE-BFP-Cas9 C3orf14KO (pool)		Fixed in 4% PFA, 48 hour serum starvation	ARL13B, Proteintech, 17711-1-AP, 1:1000	CEP170, Invitrogen, 41-3200, 1:1000	Ac-Tub, 6B-11, SIGMA, 1:2000	DAPI	2019-01-28	No.3
KAN437-38	RPE-BFP-Cas9 pMCB306 (pool)		Fixed in 4% PFA, 72 hour serum starvation	ARL13B, Proteintech, 17711-1-AP, 1:1000	CEP170, Invitrogen, 41-3200, 1:1000	Ac-Tub, 6B-11, SIGMA, 1:2000	DAPI	2019-01-28	No.3
KAN437-39	RPE-BFP-Cas9 CEP89KO (pool)		Fixed in 4% PFA, 72 hour serum starvation	ARL13B, Proteintech, 17711-1-AP, 1:1000	CEP170, Invitrogen, 41-3200, 1:1000	Ac-Tub, 6B-11, SIGMA, 1:2000	DAPI	2019-01-28	No.3
KAN437-40	RPE-BFP-Cas9 NCS1KO (pool)		Fixed in 4% PFA, 72 hour serum starvation	ARL13B, Proteintech, 17711-1-AP, 1:1000	CEP170, Invitrogen, 41-3200, 1:1000	Ac-Tub, 6B-11, SIGMA, 1:2000	DAPI	2019-01-28	No.3
KAN437-41	RPE-BFP-Cas9 C3orf14KO (pool)		Fixed in 4% PFA, 72 hour serum starvation	ARL13B, Proteintech, 17711-1-AP, 1:1000	CEP170, Invitrogen, 41-3200, 1:1000	Ac-Tub, 6B-11, SIGMA, 1:2000	DAPI	2019-01-28	No.3
KAN437-47	RPE-BFP-Cas9 pMCB306 (pool)		Fixed in 4% PFA, 96 hour serum starvation	ARL13B, Proteintech, 17711-1-AP, 1:1000	CEP170, Invitrogen, 41-3200, 1:1000	Ac-Tub, 6B-11, SIGMA, 1:2000	DAPI	2019-01-28	No.3
KAN437-48	RPE-BFP-Cas9 CEP89KO (pool)		Fixed in 4% PFA, 96 hour serum starvation	ARL13B, Proteintech, 17711-1-AP, 1:1000	CEP170, Invitrogen, 41-3200, 1:1000	Ac-Tub, 6B-11, SIGMA, 1:2000	DAPI	2019-01-28	No.3
KAN437-49	RPE-BFP-Cas9 NCS1KO (pool)		Fixed in 4% PFA, 96 hour serum starvation	ARL13B, Proteintech, 17711-1-AP, 1:1000	CEP170, Invitrogen, 41-3200, 1:1000	Ac-Tub, 6B-11, SIGMA, 1:2000	DAPI	2019-01-28	No.3
KAN437-50	RPE-BFP-Cas9 C3orf14KO (pool)		Fixed in 4% PFA, 96 hour serum starvation	ARL13B, Proteintech, 17711-1-AP, 1:1000	CEP170, Invitrogen, 41-3200, 1:1000	Ac-Tub, 6B-11, SIGMA, 1:2000	DAPI	2019-01-28	No.3

## Sheet: Statistics
Multiple unpaired t test
sgGFP v.s. NCS1 KO
	Below threshold?	P value	Mean of sgGFP (pMCB306)	Mean of NCS1 KO	Difference	SE of difference	t ratio	df	Adjusted P Value
0 hour	Yes	0.000598	7.111	0.1276	6.984	0.5478	12.75	3.343	0.002986
12 hour serum starvation	Yes	0.000133	39.12	5.828	33.29	2.59	12.85	4.316	0.000797
24 hour serum starvation	Yes	0.001473	80.12	41.11	39.01	4.98	7.834	3.974	0.00588
48 hour serum starvation	No	0.074946	88.05	72.84	15.21	5.97	2.547	3.374	0.208409
72 hour serum starvation	No	0.295729	88.73	75.61	13.12	10.59	1.239	3.323	0.295729
96 hour serum starvation	No	0.087834	85.11	56.36	28.75	11.41	2.521	2.94	0.208409
sgGFP v.s. CEP89 KO
	Below threshold?	P value	Mean of sgGFP (pMCB306)	Mean of CEP89 KO	Difference	SE of difference	t ratio	df	Adjusted P Value
0 hour	Yes	3e-05	7.111	0.5321	6.579	0.5868	11.21	6	0.00018
12 hour serum starvation	Yes	3.4e-05	39.12	9.2	29.92	2.727	10.97	6	0.00018
24 hour serum starvation	Yes	3.9e-05	80.12	45.58	34.54	3.224	10.72	6	0.00018
48 hour serum starvation	No	0.018531	88.05	64.42	23.63	7.377	3.203	6	0.05457
72 hour serum starvation	No	0.263124	88.73	72.46	16.27	12.5	1.301	4	0.263124
96 hour serum starvation	No	0.116177	85.11	62.57	22.54	11.27	2	4	0.218857
sgGFP v.s. C3ORF14 KO
	Discovery?	P value	Mean of sgGFP (pMCB306)	Mean of C3ORF14 KO	Difference	SE of difference	t ratio	df	q value
0 hour	No	0.040709	7.111	4.567	2.544	0.9451	2.692	5.297	0.082232
12 hour serum starvation	No	0.012088	39.12	26.64	12.48	3.501	3.566	5.928	0.073256
24 hour serum starvation	No	0.026327	80.12	69.51	10.61	3.444	3.08	5.164	0.07977
48 hour serum starvation	No	0.430218	88.05	89.92	-1.869	2.208	0.8467	5.886	0.65178
72 hour serum starvation	No	0.685163	88.73	91.46	-2.729	6.047	0.4513	2.729	0.692015
96 hour serum starvation	No	0.591672	85.11	88.8	-3.691	6.288	0.587	3.639	0.692015
