# Supplementary material for: Myristoylated Neuronal Calcium Sensor-1 captures the preciliary vesicle at distal appendages
Source: eLife. 2025 Jan 30;14:e85998. doi: 10.7554/eLife.85998 (PMC11984960; doi:10.7554/eLife.85998)
Supplement: Figure 3—source data 2. [file elife-85998-fig3-data2.xlsx]

## Sheet: Raw data
Replicate 1		sgGFP				CEP89 KO + empty				CEP89 KO + CEP89 WT				NCS1 KO + empty				NCS1 KO + WT
	Ciliated	cell counts	ARL13B+ Ac-Tub- dot		Ciliated	cell counts	ARL13B+ Ac-Tub- dot		Ciliated	cell counts	ARL13B+ Ac-Tub- dot		Ciliated	cell counts	ARL13B+ Ac-Tub- dot		Ciliated	cell counts	ARL13B+ Ac-Tub- dot
KAN416-21	22	26		KAN416-26	12	26	1	KAN416-27	17	31		KAN416-28	9	24	2	KAN416-29	18	33	1
2	16	25		2	14	30		2	29	38		2	23	39	1	2	26	38	1
3	19	22		3	19	42	1	3	18	40	3	3	18	43	4	3	22	36
4	15	21		4	15	34	4	4	24	35		4	16	35		4	22	36	1
5	26	30		5	15	31	1	5	21	38		5	17	41	1	5	20	30
6	15	21	1	6	9	31		6	26	36		6	20	39		6	32	42
7				7				7				7	16	44	1	7
8				8				8				8				8
9				9				9				9				9
10				10				10				10				10
	113	145	1		84	194	7		135	218	3		119	265	9		140	215	3
		77.931				43.299				61.9266				44.9057				65.1163
Replicate 2		sgGFP				CEP89 KO + empty				CEP89 KO + CEP89 WT				NCS1 KO + empty				NCS1 KO + WT
	Ciliated	cell counts	ARL13B+ Ac-Tub- dot		Ciliated	cell counts	ARL13B+ Ac-Tub- dot		Ciliated	cell counts	ARL13B+ Ac-Tub- dot		Ciliated	cell counts	ARL13B+ Ac-Tub- dot		Ciliated	cell counts	ARL13B+ Ac-Tub- dot
KAN423-19	28	32		KAN423-24	18	31	1	KAN423-25	36	46		KAN423-26	11	30		KAN423-27	31	44	2
2	22	30		2	15	34	2	2	30	50		2	11	37		2	34	41	1
3	16	23		3	22	39	2	3	33	52		3	13	37		3	28	36
4	26	29	1	4	17	38		4	30	40		4	17	41		4	22	31
5	27	33	1	5	20	33		5	30	42		5	16	36	2	5	23	41	1
6	30	37	1	6	16	39	2	6	25	35		6	15	37	2	6	27	37	1
7				7				7				7				7
8				8				8				8				8
9				9				9				9				9
10				10				10				10				10
	149	184	3		108	214	7		184	265	0		83	218	4		165	230	5
		80.9783				50.4673				69.434				38.0734				71.7391
Replicate 3		sgGFP				CEP89 KO + empty				CEP89 KO + CEP89 WT				NCS1 KO + empty				NCS1 KO + WT
	Ciliated	cell counts	ARL13B+ Ac-Tub- dot		Ciliated	cell counts	ARL13B+ Ac-Tub- dot		Ciliated	cell counts	ARL13B+ Ac-Tub- dot		Ciliated	cell counts	ARL13B+ Ac-Tub- dot		Ciliated	cell counts	ARL13B+ Ac-Tub- dot
KAN437-19	23	29	2	KAN437-24	15	33	3	KAN437-25	27	42	2	KAN437-26	14	36		KAN437-27	21	29	2
2	21	28		2	23	41		2	22	36	2	2	18	38		2	17	30	2
3	22	30		3	17	30		3	20	40		3	8	28	1	3	17	29	3
4	23	35	1	4	17	38		4	24	36	3	4	13	37	1	4	23	33	1
5	26	29	1	5	8	31		5	25	40		5	15	37	2	5	21	37
6	31	36		6	11	34		6				6	8	33	3	6	21	33
7				7				7				7				7
8				8				8				8				8
9				9				9				9				9
10				10				10				10				10
	146	187	4		91	207	3		118	194	7		76	209	7		120	191	8
		78.0749				43.9614				60.8247				36.3636				62.8272

## Sheet: Total
Cell line	Transgene	KAN416	KAN423	KAN437	Average	S.E.M
RPE-BFP-Cas9 pMCB306 (pool)		77.931	80.9783	77.931	78.9468	1.01574
RPE-BFP-Cas9 CEP89KO (pool)	empty	43.299	50.4673	43.299	45.6884	2.38944
RPE-BFP-Cas9 CEP89KO (pool)	nontagCEP89	61.9266	69.434	61.9266	64.4291	2.50245
RPE-BFP-Cas9 NCS1KO (pool)	empty	44.9057	38.0734	44.9057	42.6282	2.27742
RPE-BFP-Cas9 NCS1KO (pool)	nontag NCS1	65.1163	71.7391	65.1163	67.3239	2.20762

## Sheet: Statistics
Table Analyzed	Data 1
Data sets analyzed	A-E						Number of families	1
							Number of comparisons per family	10
ANOVA summary							Alpha	0.05
F	50.87
P value	<0.0001						Tukey's multiple comparisons test	Mean Diff.	95.00% CI of diff.	Below threshold?	Summary	Adjusted P Value
P value summary	****						sgGFP (pMCB306) vs. CEP89 KO + empty	33.26	23.26 to 43.25	Yes	****	<0.0001	A-B
Significant diff. among means (P < 0.05)?	Yes						sgGFP (pMCB306) vs. CEP89 KO + nontag CEP89	14.52	4.522 to 24.51	Yes	**	0.0052	A-C
R squared	0.9532						sgGFP (pMCB306) vs. NCS1 KO + empty	36.32	26.32 to 46.31	Yes	****	<0.0001	A-D
							sgGFP (pMCB306) vs. NCS1 KO + nontag NCS1	11.62	1.627 to 21.62	Yes	*	0.0218	A-E
Brown-Forsythe test							CEP89 KO + empty vs. CEP89 KO + nontag CEP89	-18.74	-28.74 to -8.744	Yes	***	0.0008	B-C
F (DFn, DFd)	0.07924 (4, 10)						CEP89 KO + empty vs. NCS1 KO + empty	3.06	-6.936 to 13.06	No	ns	0.8463	B-D
P value	0.987						CEP89 KO + empty vs. NCS1 KO + nontag NCS1	-21.64	-31.63 to -11.64	Yes	***	0.0002	B-E
P value summary	ns						CEP89 KO + nontag CEP89 vs. NCS1 KO + empty	21.8	11.80 to 31.80	Yes	***	0.0002	C-D
Are SDs significantly different (P < 0.05)?	No						CEP89 KO + nontag CEP89 vs. NCS1 KO + nontag NCS1	-2.895	-12.89 to 7.101	No	ns	0.8696	C-E
							NCS1 KO + empty vs. NCS1 KO + nontag NCS1	-24.7	-34.69 to -14.70	Yes	****	<0.0001	D-E
Bartlett's test
Bartlett's statistic (corrected)							Test details	Mean 1	Mean 2	Mean Diff.	SE of diff.	n1	n2	q	DF
P value							sgGFP (pMCB306) vs. CEP89 KO + empty	78.95	45.69	33.26	3.037	3	3	15.49	10
P value summary							sgGFP (pMCB306) vs. CEP89 KO + nontag CEP89	78.95	64.43	14.52	3.037	3	3	6.76	10
Are SDs significantly different (P < 0.05)?							sgGFP (pMCB306) vs. NCS1 KO + empty	78.95	42.63	36.32	3.037	3	3	16.91	10
							sgGFP (pMCB306) vs. NCS1 KO + nontag NCS1	78.95	67.32	11.62	3.037	3	3	5.412	10
ANOVA table	SS	DF	MS	F (DFn, DFd)	P value		CEP89 KO + empty vs. CEP89 KO + nontag CEP89	45.69	64.43	-18.74	3.037	3	3	8.726	10
Treatment (between columns)	2816	4	704	F (4, 10) = 50.87	P<0.0001		CEP89 KO + empty vs. NCS1 KO + empty	45.69	42.63	3.06	3.037	3	3	1.425	10
Residual (within columns)	138.4	10	13.84				CEP89 KO + empty vs. NCS1 KO + nontag NCS1	45.69	67.32	-21.64	3.037	3	3	10.07	10
Total	2954	14					CEP89 KO + nontag CEP89 vs. NCS1 KO + empty	64.43	42.63	21.8	3.037	3	3	10.15	10
							CEP89 KO + nontag CEP89 vs. NCS1 KO + nontag NCS1	64.43	67.32	-2.895	3.037	3	3	1.348	10
Data summary							NCS1 KO + empty vs. NCS1 KO + nontag NCS1	42.63	67.32	-24.7	3.037	3	3	11.5	10
Number of treatments (columns)	5
Number of values (total)	15

## Sheet: IFcondition
Exp. number	Cell line	Gene induced	Culture condition, fixation condition	rabbit-Alexa488	mouse IgG1-Alexa568	mouse IgG2b-Alexa647	Nuclear stain	Date	Replicate
Replicate 1
KAN416-21	RPE-BFP-Cas9 pMCB306 (pool)		Fixed in 4% PFA, 24 hour serum starvation	ARL13B, Proteintech, 17711-1-AP, 1:1000	CEP170, Invitrogen, 41-3200, 1:1000	Ac-Tub, 6B-11, SIGMA, 1:2000	DAPI	2018-12-10	No.1
KAN416-26	RPE-BFP-Cas9 CEP89KO (pool)	empty	Fixed in 4% PFA, 24 hour serum starvation	ARL13B, Proteintech, 17711-1-AP, 1:1000	CEP170, Invitrogen, 41-3200, 1:1000	Ac-Tub, 6B-11, SIGMA, 1:2000	DAPI	2018-12-10	No.1
KAN416-27	RPE-BFP-Cas9 CEP89KO (pool)	nontagCEP89	Fixed in 4% PFA, 24 hour serum starvation	ARL13B, Proteintech, 17711-1-AP, 1:1000	CEP170, Invitrogen, 41-3200, 1:1000	Ac-Tub, 6B-11, SIGMA, 1:2000	DAPI	2018-12-10	No.1
KAN416-28	RPE-BFP-Cas9 NCS1KO (pool)	empty	Fixed in 4% PFA, 24 hour serum starvation	ARL13B, Proteintech, 17711-1-AP, 1:1000	CEP170, Invitrogen, 41-3200, 1:1000	Ac-Tub, 6B-11, SIGMA, 1:2000	DAPI	2018-12-10	No.1
KAN416-29	RPE-BFP-Cas9 NCS1KO (pool)	nontag NCS1	Fixed in 4% PFA, 24 hour serum starvation	ARL13B, Proteintech, 17711-1-AP, 1:1000	CEP170, Invitrogen, 41-3200, 1:1000	Ac-Tub, 6B-11, SIGMA, 1:2000	DAPI	2018-12-10	No.1
Replicate 2
KAN423-19	RPE-BFP-Cas9 pMCB306 (pool)		Fixed in 4% PFA, 24 hour serum starvation	ARL13B, Proteintech, 17711-1-AP, 1:1000	CEP170, Invitrogen, 41-3200, 1:1000	Ac-Tub, 6B-11, SIGMA, 1:2000	DAPI	2018-12-19	No.2
KAN423-24	RPE-BFP-Cas9 CEP89KO (pool)	empty	Fixed in 4% PFA, 24 hour serum starvation	ARL13B, Proteintech, 17711-1-AP, 1:1000	CEP170, Invitrogen, 41-3200, 1:1000	Ac-Tub, 6B-11, SIGMA, 1:2000	DAPI	2018-12-19	No.2
KAN423-25	RPE-BFP-Cas9 CEP89KO (pool)	nontagCEP89	Fixed in 4% PFA, 24 hour serum starvation	ARL13B, Proteintech, 17711-1-AP, 1:1000	CEP170, Invitrogen, 41-3200, 1:1000	Ac-Tub, 6B-11, SIGMA, 1:2000	DAPI	2018-12-19	No.2
KAN423-26	RPE-BFP-Cas9 NCS1KO (pool)	empty	Fixed in 4% PFA, 24 hour serum starvation	ARL13B, Proteintech, 17711-1-AP, 1:1000	CEP170, Invitrogen, 41-3200, 1:1000	Ac-Tub, 6B-11, SIGMA, 1:2000	DAPI	2018-12-19	No.2
KAN423-27	RPE-BFP-Cas9 NCS1KO (pool)	nontag NCS1	Fixed in 4% PFA, 24 hour serum starvation	ARL13B, Proteintech, 17711-1-AP, 1:1000	CEP170, Invitrogen, 41-3200, 1:1000	Ac-Tub, 6B-11, SIGMA, 1:2000	DAPI	2018-12-19	No.2
Replicate 3
KAN437-19	RPE-BFP-Cas9 pMCB306 (pool)		Fixed in 4% PFA, 24 hour serum starvation	ARL13B, Proteintech, 17711-1-AP, 1:1000	CEP170, Invitrogen, 41-3200, 1:1000	Ac-Tub, 6B-11, SIGMA, 1:2000	DAPI	2019-01-28	No.3
KAN437-24	RPE-BFP-Cas9 CEP89KO (pool)	empty	Fixed in 4% PFA, 24 hour serum starvation	ARL13B, Proteintech, 17711-1-AP, 1:1000	CEP170, Invitrogen, 41-3200, 1:1000	Ac-Tub, 6B-11, SIGMA, 1:2000	DAPI	2019-01-28	No.3
KAN437-25	RPE-BFP-Cas9 CEP89KO (pool)	nontagCEP89	Fixed in 4% PFA, 24 hour serum starvation	ARL13B, Proteintech, 17711-1-AP, 1:1000	CEP170, Invitrogen, 41-3200, 1:1000	Ac-Tub, 6B-11, SIGMA, 1:2000	DAPI	2019-01-28	No.3
KAN437-26	RPE-BFP-Cas9 NCS1KO (pool)	empty	Fixed in 4% PFA, 24 hour serum starvation	ARL13B, Proteintech, 17711-1-AP, 1:1000	CEP170, Invitrogen, 41-3200, 1:1000	Ac-Tub, 6B-11, SIGMA, 1:2000	DAPI	2019-01-28	No.3
KAN437-27	RPE-BFP-Cas9 NCS1KO (pool)	nontag NCS1	Fixed in 4% PFA, 24 hour serum starvation	ARL13B, Proteintech, 17711-1-AP, 1:1000	CEP170, Invitrogen, 41-3200, 1:1000	Ac-Tub, 6B-11, SIGMA, 1:2000	DAPI	2019-01-28	No.3
