# Supplementary material for: Myristoylated Neuronal Calcium Sensor-1 captures the preciliary vesicle at distal appendages
Source: eLife. 2025 Jan 30;14:e85998. doi: 10.7554/eLife.85998 (PMC11984960; doi:10.7554/eLife.85998)
Supplement: Figure 3—source data 3. [file elife-85998-fig3-data3.xlsx]

## Sheet: Raw Data
	Rab34+ centriole	cell counts	Dot	Extension	tunnel?	preciliary vesicle??		Rab34+ centriole	cell counts	Dot	Extension	tunnel?	preciliary vesicle??		Rab34+ centriole	cell counts	Dot	Extension	tunnel?	preciliary vesicle??		Rab34+ centriole	cell counts	Dot	Extension	tunnel?	preciliary vesicle??
KAN472-1		9	3				KAN472-2		13	1				KAN472-3		13	0				KAN472-4		10	5								sgGFP	CEP89 KO	NCS1 KO	C3ORF14 KO
2		9	3				2		17	2				2		9	0				2		10	3							KAN472	31.25	9.09091	4.05405	30.6452
3		13	4	2			3		9	0				3		14	1				3		11	1							KAN476	20.2703	5.26316	3.94737	23.9437
4		8	3				4		13	0				4		16	0				4		10	2							KAN480	27.451	12.5	8.10811	25.8929
5		14	3				5		12	4				5		9	1				5		9	3							KAN481	26.6667	14.2857	3.57143
6		11	2				6		13	0				6		13	1				6		12	5								26.4095	10.2849	4.92024	26.8272
7							7							7							7
8							8							8							8
9							9							9							9
10							10							10							10
	20	64	18	2				7	77	7	0				3	74	3	0				19	62	19	0
		31.25	28.125	3.125					9.09091	9.09091	0					4.05405	4.05405	0					30.6452	30.6452	0
	Rab34+ centriole	cell counts	Dot	Extension	tunnel?	preciliary vesicle??		Rab34+ centriole	cell counts	Dot	Extension	tunnel?	preciliary vesicle??		Rab34+ centriole	cell counts	Dot	Extension	tunnel?	preciliary vesicle??		Rab34+ centriole	cell counts	Dot	Extension	tunnel?	preciliary vesicle??
KAN476-1		12	3	1			KAN476-2		9	0				KAN476-3		10	0				KAN476-4		16	3
2		11	0				2		11	0				2		12	1				2		9	0
3		9	3				3		9	0				3		16	1				3		9	4
4		10	2				4		10	0				4		11	0				4		13	3	1
5		13	0				5		7	1				5		12	0				5		13	2
6		9	4				6		11	2				6		15	1				6		11	4
7		10	1	1			7							7							7
8							8							8							8
9							9							9							9
10							10							10							10
	15	74	13	2				3	57	3	0				3	76	3	0				17	71	16	1
		20.2703	17.5676	2.7027					5.26316	5.26316	0					3.94737	3.94737	0					23.9437	22.5352	1.40845
	Rab34+ centriole	cell counts	Dot	Extension	tunnel?	preciliary vesicle??		Rab34+ centriole	cell counts	Dot	Extension	tunnel?	preciliary vesicle??		Rab34+ centriole	cell counts	Dot	Extension	tunnel?	preciliary vesicle??		Rab34+ centriole	cell counts	Dot	Extension	tunnel?	preciliary vesicle??
KAN480-1		14	3	1			KAN480-2		9	1				KAN480-3		13	0				KAN480-4		21	3
2		14	2	1			2		10	2				2		14	1				2		14	3
3		12	4				3		13	0				3		13	1				3		12	4	1
4		14	5				4		11	0				4		15	2				4		13	4
5		9	4				5		11	3				5		12	2				5		12	3
6		12	4				6		11	0				6		16	1				6		14	4
7		12		1			7		17	2				7		14	1				7		14	5
8		15	3				8		14	4				8		14	1				8		12	2
9							9							9							9
10							10							10							10
	28	102	25	3	0	0		12	96	12	0	0	0		9	111	9	0	0	0		29	112	28	1	0	0
		27.451	24.5098	2.94118					12.5	12.5	0					8.10811	8.10811	0					25.8929	25	0.892857
	Rab34+ centriole	cell counts	Dot	Extension	tunnel?	preciliary vesicle??		Rab34+ centriole	cell counts	Dot	Extension	tunnel?	preciliary vesicle??		Rab34+ centriole	cell counts	Dot	Extension	tunnel?	preciliary vesicle??		Rab34+ centriole	cell counts	Dot	Extension	tunnel?
KAN481-1		10	5	1			KAN481-2		10	1				KAN481-3		15	1				KAN481-4		10	4
2		11	3		1		2		15	0				2		18	0				2		14	1	2
3		12	2				3		11	2				3		13	2				3		17	1
4		9	2				4		18	2	1			4		16	0				4		14	3	1
5		9	2				5		11	1				5		11	0				5		11	3
6		9	1				6		12	4				6		11	0				6		12	3	3
7							7							7							7
8							8							8							8
9							9							9							9
10							10							10							10
	16	60	15	1	1	0		11	77	10	1	0	0		3	84	3	0	0	0		21	78	15	6	0
		26.6667	25	1.66667					14.2857	12.987	1.2987					3.57143	3.57143	0					26.9231	19.2308	7.69231

## Sheet: IF condition
Exp. number	Cell line	Gene induced	Culture condition, fixation condition	rabbit-Alexa488	mouse IgG1-Alexa568	mouse IgG2b-Alexa647	Nuclear stain	Date	Replicate
Replicate 1
KAN472-1	RPE-BFP-Cas9 pMCB306 (pool)	confluent	Fixed in 4% PFA at RT for 15 minutes.	Rab34, 27435-1-AP, Proteintech, 1:1000	CEP170, Invitrogen, 41-3200, 1:1000	FGFR1OP,H00011116-M01, 1:1000	DAPI	2019-05-02	No.2
KAN472-2	RPE-BFP-Cas9 CEP89KO (pool)	confluent	Fixed in 4% PFA at RT for 15 minutes.	Rab34, 27435-1-AP, Proteintech, 1:1000	CEP170, Invitrogen, 41-3200, 1:1000	FGFR1OP,H00011116-M01, 1:1000	DAPI	2019-05-02	No.2
KAN472-3	RPE-BFP-Cas9 NCS1KO (pool)	confluent	Fixed in 4% PFA at RT for 15 minutes.	Rab34, 27435-1-AP, Proteintech, 1:1000	CEP170, Invitrogen, 41-3200, 1:1000	FGFR1OP,H00011116-M01, 1:1000	DAPI	2019-05-02	No.2
KAN472-4	RPE-BFP-Cas9 C3orf14KO (pool)	confluent	Fixed in 4% PFA at RT for 15 minutes.	Rab34, 27435-1-AP, Proteintech, 1:1000	CEP170, Invitrogen, 41-3200, 1:1000	FGFR1OP,H00011116-M01, 1:1000	DAPI	2019-05-02	No.2
Replicate 2
KAN476-1	RPE-BFP-Cas9 pMCB306 (pool)	confluent	Fixed in 4% PFA at RT for 15 minutes.	Rab34, 27435-1-AP, Proteintech, 1:1000	CEP170, Invitrogen, 41-3200, 1:1000	FGFR1OP,H00011116-M01, 1:1000	DAPI	2019-05-06	No.4
KAN476-2	RPE-BFP-Cas9 CEP89KO (pool)	confluent	Fixed in 4% PFA at RT for 15 minutes.	Rab34, 27435-1-AP, Proteintech, 1:1000	CEP170, Invitrogen, 41-3200, 1:1000	FGFR1OP,H00011116-M01, 1:1000	DAPI	2019-05-06	No.4
KAN476-3	RPE-BFP-Cas9 NCS1KO (pool)	confluent	Fixed in 4% PFA at RT for 15 minutes.	Rab34, 27435-1-AP, Proteintech, 1:1000	CEP170, Invitrogen, 41-3200, 1:1000	FGFR1OP,H00011116-M01, 1:1000	DAPI	2019-05-06	No.4
KAN476-4	RPE-BFP-Cas9 C3orf14KO (pool)	confluent	Fixed in 4% PFA at RT for 15 minutes.	Rab34, 27435-1-AP, Proteintech, 1:1000	CEP170, Invitrogen, 41-3200, 1:1000	FGFR1OP,H00011116-M01, 1:1000	DAPI	2019-05-06	No.4
Exp. number	Cell line	Gene induced	Culture condition, fixation condition	Mouse IgG2a-Alexa488	rabbit-Alexa568	mouse IgG2b-Alexa647	Nuclear stain	Date	Replicate
Replicate 3
KAN480-1	RPE-BFP-Cas9 pMCB306 (pool)	confluent	Fixed in 4% PFA at RT for 15 minutes.	Myosin Va, sc-365986, Santa Cruz, 1:1000	Rab34, 27435-1-AP, Proteintech, 1:1000	FGFR1OP,H00011116-M01, 1:1000	DAPI	2019-05-09	No.3
KAN480-2	RPE-BFP-Cas9 CEP89KO (pool)	confluent	Fixed in 4% PFA at RT for 15 minutes.	Myosin Va, sc-365986, Santa Cruz, 1:1000	Rab34, 27435-1-AP, Proteintech, 1:1000	FGFR1OP,H00011116-M01, 1:1000	DAPI	2019-05-09	No.3
KAN480-3	RPE-BFP-Cas9 NCS1KO (pool)	confluent	Fixed in 4% PFA at RT for 15 minutes.	Myosin Va, sc-365986, Santa Cruz, 1:1000	Rab34, 27435-1-AP, Proteintech, 1:1000	FGFR1OP,H00011116-M01, 1:1000	DAPI	2019-05-09	No.3
KAN480-4	RPE-BFP-Cas9 C3orf14KO (pool)	confluent	Fixed in 4% PFA at RT for 15 minutes.	Myosin Va, sc-365986, Santa Cruz, 1:1000	Rab34, 27435-1-AP, Proteintech, 1:1000	FGFR1OP,H00011116-M01, 1:1000	DAPI	2019-05-09	No.3
Exp. number	Cell line	Gene induced	Culture condition, fixation condition	rabbit-Alexa488	mouse IgG1-Alexa568	mouse IgG2b-Alexa647	Nuclear stain	Date	Replicate
Replicate 4
KAN481-1	RPE-BFP-Cas9 pMCB306 (pool)	confluent	Fixed in 4% PFA at RT for 15 minutes.	Rab34, 27435-1-AP, Proteintech, 1:1000	ARL13B, Santa Cruz, sc-515784, 1:500	FGFR1OP,H00011116-M01, 1:1000	DAPI	2019-05-09	No.1
KAN481-2	RPE-BFP-Cas9 CEP89KO (pool)	confluent	Fixed in 4% PFA at RT for 15 minutes.	Rab34, 27435-1-AP, Proteintech, 1:1000	ARL13B, Santa Cruz, sc-515784, 1:500	FGFR1OP,H00011116-M01, 1:1000	DAPI	2019-05-09	No.1
KAN481-3	RPE-BFP-Cas9 NCS1KO (pool)	confluent	Fixed in 4% PFA at RT for 15 minutes.	Rab34, 27435-1-AP, Proteintech, 1:1000	ARL13B, Santa Cruz, sc-515784, 1:500	FGFR1OP,H00011116-M01, 1:1000	DAPI	2019-05-09	No.1

## Sheet: Statistics
Table Analyzed	Data 1		Table Analyzed	Data 1		Table Analyzed	Data 1
Column B	CEP89 KO		Column C	NCS1 KO		Column D	C3ORF14 KO
vs.	vs.		vs.	vs.		vs.	vs.
Column A	sgGFP (pMCB306)		Column A	sgGFP (pMCB306)		Column A	sgGFP (pMCB306)
Unpaired t test with Welch's correction			Unpaired t test with Welch's correction			Unpaired t test with Welch's correction
P value	0.0019		P value	0.0008		P value	0.8956
P value summary	**		P value summary	***		P value summary	ns
Significantly different (P < 0.05)?	Yes		Significantly different (P < 0.05)?	Yes		Significantly different (P < 0.05)?	No
One- or two-tailed P value?	Two-tailed		One- or two-tailed P value?	Two-tailed		One- or two-tailed P value?	Two-tailed
Welch-corrected t, df	t=5.330, df=5.894		Welch-corrected t, df	t=8.542, df=4.257		Welch-corrected t, df	t=0.1381, df=4.978
How big is the difference?			How big is the difference?			How big is the difference?
Mean of column A	26.41		Mean of column A	26.41		Mean of column A	26.41
Mean of column B	10.28		Mean of column C	4.92		Mean of column D	26.83
Difference between means (B - A) ± SEM	-16.12 ± 3.025		Difference between means (C - A) ± SEM	-21.49 ± 2.516		Difference between means (D - A) ± SEM	0.4177 ± 3.025
95% confidence interval	-23.56 to -8.690		95% confidence interval	-28.31 to -14.67		95% confidence interval	-7.369 to 8.204
R squared (eta squared)	0.8282		R squared (eta squared)	0.9449		R squared (eta squared)	0.003817
F test to compare variances			F test to compare variances			F test to compare variances
F, DFn, Dfd	1.309, 3, 3		F, DFn, Dfd	4.552, 3, 3		F, DFn, Dfd	1.747, 3, 2
P value	0.8299		P value	0.245		P value	0.7685
P value summary	ns		P value summary	ns		P value summary	ns
Significantly different (P < 0.05)?	No		Significantly different (P < 0.05)?	No		Significantly different (P < 0.05)?	No
Data analyzed			Data analyzed			Data analyzed
Sample size, column A	4		Sample size, column A	4		Sample size, column A	4
Sample size, column B	4		Sample size, column C	4		Sample size, column D	3
