# Supplementary material for: Myristoylated Neuronal Calcium Sensor-1 captures the preciliary vesicle at distal appendages
Source: eLife. 2025 Jan 30;14:e85998. doi: 10.7554/eLife.85998 (PMC11984960; doi:10.7554/eLife.85998)
Supplement: Figure 3—source data 6. [file elife-85998-fig3-data6.xlsx]

## Sheet: RawData_Replicate1
	Label	Area	Mean	Min	Max	X	Y	Circ	IntDen	RawIntDen	AR	Round	Solidity
1	IFT88_KAN487-1_2.tif:0001-0101	1.027	212.857	0	1128	100.285	10.357	0.873	218.652	20860	1.317	0.759	0.912	1.14917
2	IFT88_KAN487-1_2.tif:0002-0410	1.457	195.065	0	1203	113.268	41.983	0.891	284.205	27114	1.316	0.76	0.894	1.4937
3	IFT88_KAN487-1_2.tif:0003-0458	0.985	198.947	0	957	87.717	46.913	0.966	196.021	18701	1.097	0.911	0.935	1.03023
4	IFT88_KAN487-1_2.tif:0004-0481	1.195	126.518	0	523	32.414	49.312	0.96	151.18	14423	1.296	0.771	0.931	0.794556
5	IFT88_KAN487-1_2.tif:0005-0637	0.901	188.209	0	633	58.494	65.25	0.96	169.659	16186	1.25	0.8	0.945	0.891679
6	IFT88_KAN487-1_2.tif:0006-0670	1.038	218.364	0	1016	15.277	68.621	0.86	226.597	21618	1.447	0.691	0.888	1.19093
7	IFT88_KAN487-1_2.tif:0007-0730	1.226	213.752	0	1333	96.152	74.732	0.901	262.141	25009	1.407	0.71	0.936	1.37773
8	IFT88_KAN487-1_2.tif:0008-0806	1.394	145.872	0	1375	135.746	82.557	0.885	203.359	19401	1.466	0.682	0.911	1.06879
9	IFT88_KAN487-1_2.tif:0009-0814	0.755	118.833	0	691	63.075	83.368	0.923	89.683	8556	1.275	0.784	0.954	0.471346
10	IFT88_KAN487-1_2.tif:0010-0994	1.373	295.527	0	1391	104.677	101.83	0.827	405.795	38714	1.64	0.61	0.897	2.13274
11	IFT88_KAN487-1_3.tif:0001-0050	1.09	127.087	0	850	12.284	5.12	0.861	138.539	13217	1.181	0.847	0.904	0.728118
12	IFT88_KAN487-1_3.tif:0002-0352	0.839	111.287	0	423	54.042	36.117	0.973	93.32	8903	1.176	0.85	0.952	0.490462
13	IFT88_KAN487-1_3.tif:0003-0384	0.943	227.489	0	1051	98.297	39.329	0.925	214.606	20474	1.117	0.896	0.933	1.1279
14	IFT88_KAN487-1_3.tif:0004-0434	1.122	146.056	0	1011	26.181	44.455	0.859	163.81	15628	1.641	0.609	0.926	0.860939
15	IFT88_KAN487-1_3.tif:0005-0480	1.069	120	0	578	61.437	49.181	1	128.298	12240	1.161	0.861	0.949	0.674296
16	IFT88_KAN487-1_3.tif:0006-0603	1.069	233.765	0	1277	108.115	61.755	0.938	249.929	23844	1.179	0.848	0.936	1.31355
17	IFT88_KAN487-1_3.tif:0007-0685	1.08	144.379	0	956	16.011	70.19	0.878	155.876	14871	1.304	0.767	0.924	0.819236
18	IFT88_KAN487-1_3.tif:0008-0695	0.629	1093.52	28	3770	97.17	71.133	0.969	687.725	65611	1.066	0.938	0.976	3.61448
19	IFT88_KAN487-1_3.tif:0009-0847	1.184	165.124	0	930	116.58	86.75	0.896	195.581	18659	1.094	0.914	0.915	1.02792
20	IFT88_KAN487-1_3.tif:0010-0898	0.996	195.958	0	1026	47.937	91.966	0.902	195.13	18616	1.216	0.822	0.922	1.02555
21	IFT88_KAN487-1_3.tif:0011-1003	0.786	80.987	0	440	77.85	102.776	0.867	63.667	6074	1.296	0.772	0.893	0.334614
22	IFT88_KAN487-1_4.tif:0001-0140	1.132	351.898	0	1618	96.618	14.312	0.883	398.363	38005	1.205	0.83	0.889	2.09368
23	IFT88_KAN487-1_4.tif:0002-0270	1.132	125.269	0	590	40.819	27.657	0.921	141.809	13529	1.298	0.77	0.935	0.745306
24	IFT88_KAN487-1_4.tif:0003-0419	1.163	140.622	0	918	94.3	42.894	0.831	163.611	15609	1.347	0.742	0.899	0.859892
25	IFT88_KAN487-1_4.tif:0004-0502	1.101	255.895	0	1177	122.211	51.446	0.833	281.637	26869	1.409	0.71	0.897	1.4802
26	IFT88_KAN487-1_4.tif:0005-0565	1.027	97.735	0	608	34.92	57.854	0.993	100.395	9578	1.168	0.856	0.942	0.527647
27	IFT88_KAN487-1_4.tif:0006-0586	0.88	13.036	0	74	72.695	60.044	0.971	11.478	1095	1.014	0.986	0.933	0.060323
28	IFT88_KAN487-1_4.tif:0007-0667	0.985	71.149	0	224	117.87	68.367	0.985	70.103	6688	1.185	0.844	0.922	0.368439
29	IFT88_KAN487-1_4.tif:0008-0876	1.09	218.375	0	1145	96.391	89.695	0.915	238.054	22711	1.13	0.885	0.904	1.25114
30	IFT88_KAN487-1_4.tif:0009-0956	0.828	305.291	0	1209	17.379	97.935	0.961	252.801	24118	1.255	0.797	0.958	1.32865
31	IFT88_KAN487-1_5.tif:0001-0227	0.765	61.877	0	324	59.978	23.237	0.942	47.347	4517	1.365	0.733	0.89	0.248839
32	IFT88_KAN487-1_5.tif:0002-0339	1.174	149.429	0	721	114.338	34.745	0.889	175.424	16736	1.421	0.704	0.914	0.921978
33	IFT88_KAN487-1_5.tif:0003-0419	0.692	215.818	0	830	11.813	42.964	0.865	149.304	14244	1.182	0.846	0.886	0.784695
34	IFT88_KAN487-1_5.tif:0004-0487	1.132	138.574	0	848	69.633	49.876	0.735	156.872	14966	2.344	0.427	0.908	0.82447
35	IFT88_KAN487-1_5.tif:0005-0506	0.912	257.621	0	1155	101.607	51.816	0.894	234.93	22413	1.211	0.826	0.911	1.23472
36	IFT88_KAN487-1_5.tif:0006-0856	1.08	109.621	0	621	96.829	87.61	0.867	118.351	11291	1.524	0.656	0.888	0.622016
37	IFT88_KAN487-1_5.tif:0007-0927	0.839	262.625	0	1186	64.349	94.885	0.939	220.224	21010	1.122	0.892	0.947	1.15743
38	IFT88_KAN487-1_5.tif:0008-0927	0.943	92.589	0	550	101.472	94.956	0.976	87.345	8333	1.158	0.864	0.905	0.459061
39	IFT88_KAN487-1_5.tif:0009-0987	0.734	41.357	0	375	38.092	101.135	0.821	30.345	2895	1.372	0.729	0.892	0.159484
40	IFT88_KAN487-1_6.tif:0001-0069	0.87	148.59	0	871	47.417	7.054	0.895	129.273	12333	1.198	0.835	0.922	0.679419
41	IFT88_KAN487-1_6.tif:0002-0152	0.901	79.988	0	515	108.665	15.632	0.927	72.105	6879	1.399	0.715	0.945	0.378961
42	IFT88_KAN487-1_6.tif:0003-0158	1.038	116.273	0	315	54.042	16.219	0.971	120.657	11511	1.029	0.972	0.934	0.634135
43	IFT88_KAN487-1_6.tif:0004-0241	1.048	137.42	0	678	18.356	24.677	0.967	144.042	13742	1.11	0.901	0.922	0.75704
44	IFT88_KAN487-1_6.tif:0005-0437	0.975	117.376	0	813	59.462	44.752	0.969	114.42	10916	1.114	0.898	0.969	0.601357
45	IFT88_KAN487-1_6.tif:0006-0506	1.3	211.694	0	1274	127.563	51.857	0.867	275.149	26250	1.4	0.714	0.932	1.4461
46	IFT88_KAN487-1_6.tif:0007-0517	0.639	214.607	0	807	13.144	52.944	0.892	137.218	13091	1.387	0.721	0.931	0.721177
47	IFT88_KAN487-1_6.tif:0008-0560	1.08	225.466	0	1187	85.276	57.309	0.852	243.42	23223	1.2	0.834	0.888	1.27934
48	IFT88_KAN487-1_6.tif:0009-0574	1.195	218.114	0	1360	139.219	58.811	0.932	260.631	24865	1.255	0.797	0.931	1.3698
49	IFT88_KAN487-1_6.tif:0010-0869	1.384	243.136	0	1643	80.315	89.02	0.888	336.405	32094	1.052	0.951	0.92	1.76804
50	IFT88_KAN487-1_6.tif:0011-0915	1.08	192.097	0	1077	40.551	93.668	0.852	207.394	19786	1.402	0.713	0.916	1.09
51	IFT88_KAN487-1_6.tif:0012-1008	1.415	205.556	0	1381	104.17	103.263	0.923	290.872	27750	1.14	0.877	0.906	1.52873
										18152.3				1
52	IFT88_KAN487-2_1.tif:0001-0016	1.331	167.866	0	1163	111.692	1.664	0.832	223.463	21319	1.159	0.863	0.882	1.17445
53	IFT88_KAN487-2_1.tif:0002-0152	1.017	187	0	936	9.895	15.601	0.951	190.13	18139	1.054	0.949	0.928	0.999269
54	IFT88_KAN487-2_1.tif:0003-0331	1.163	163.207	0	1048	117.882	33.913	0.881	189.889	18116	1.416	0.706	0.925	0.998002
55	IFT88_KAN487-2_1.tif:0004-0411	0.88	149.548	10	425	126.604	42.109	0.957	131.673	12562	1.104	0.906	0.918	0.692034
56	IFT88_KAN487-2_1.tif:0005-0493	1.09	161.942	0	864	4.982	50.451	0.887	176.535	16842	1.405	0.712	0.929	0.927818
57	IFT88_KAN487-2_1.tif:0006-0545	0.849	162.889	0	804	13.713	55.807	0.861	138.298	13194	1.514	0.661	0.885	0.726851
58	IFT88_KAN487-2_1.tif:0007-0560	1.006	102.198	0	475	116.043	57.299	0.899	102.838	9811	1.306	0.766	0.901	0.540483
59	IFT88_KAN487-2_1.tif:0008-0562	0.818	91.795	0	609	87.407	57.602	0.915	75.05	7160	1.278	0.783	0.934	0.394441
60	IFT88_KAN487-2_1.tif:0009-0586	1.205	134.313	0	853	69.993	60.021	0.841	161.903	15446	1.472	0.679	0.885	0.850913
61	IFT88_KAN487-2_1.tif:0010-0621	1.006	102.656	0	791	31.304	63.565	0.911	103.299	9855	1.272	0.786	0.914	0.542907
62	IFT88_KAN487-2_1.tif:0011-0834	0.922	204.17	0	637	101.094	85.402	0.917	188.328	17967	1.136	0.88	0.951	0.989793
63	IFT88_KAN487-2_1.tif:0012-0882	0.943	158.989	0	752	35.947	90.319	1	149.985	14309	1.098	0.91	0.963	0.788276
64	IFT88_KAN487-2_1.tif:0013-0909	1.247	129	0	1009	63.918	93.034	0.856	160.907	15351	1.598	0.626	0.919	0.845679
65	IFT88_KAN487-2_1.tif:0014-0925	0.964	156.109	0	806	37.804	94.74	0.82	150.54	14362	1.599	0.625	0.902	0.791196
66	IFT88_KAN487-2_2.tif:0001-0126	0.912	64.989	0	527	15.711	12.917	0.925	59.264	5654	1.091	0.916	0.921	0.311476
67	IFT88_KAN487-2_2.tif:0002-0140	1.143	146.33	0	963	131.225	14.38	0.742	167.186	15950	1.697	0.589	0.852	0.878678
68	IFT88_KAN487-2_2.tif:0003-0239	0.702	180.284	15	432	86.661	24.5	1	126.61	12079	1.101	0.909	0.924	0.665426
69	IFT88_KAN487-2_2.tif:0004-0264	0.839	86.138	0	719	17.778	27.044	0.959	72.23	6891	1.101	0.908	0.925	0.379622
70	IFT88_KAN487-2_2.tif:0005-0307	0.818	105.09	0	525	75.663	31.441	0.935	85.92	8197	1.029	0.972	0.907	0.451569
71	IFT88_KAN487-2_2.tif:0006-0388	0.891	192.365	0	893	38.278	39.769	0.845	171.389	16351	1.45	0.689	0.89	0.900769
72	IFT88_KAN487-2_2.tif:0007-0467	1.216	130.828	0	791	141.571	47.733	0.894	159.073	15176	1.167	0.857	0.935	0.836038
73	IFT88_KAN487-2_2.tif:0008-0611	1.027	83.673	0	303	3.615	62.613	0.93	85.951	8200	1.435	0.697	0.933	0.451734
74	IFT88_KAN487-2_2.tif:0009-0648	1.499	147.818	0	1287	44.995	66.322	0.827	221.566	21138	1.501	0.666	0.914	1.16448
75	IFT88_KAN487-2_2.tif:0010-0691	1.205	117.052	0	650	74.32	70.816	0.928	141.096	13461	1.039	0.963	0.906	0.74156
76	IFT88_KAN487-2_2.tif:0011-0798	0.86	180.22	0	445	11.986	81.795	0.948	154.901	14778	1.234	0.811	0.932	0.814113
77	IFT88_KAN487-2_2.tif:0012-0812	1.258	150.983	0	1125	101.949	83.094	0.863	189.91	18118	1.451	0.689	0.927	0.998112
78	IFT88_KAN487-2_2.tif:0013-0926	1.069	40.578	0	132	132.665	94.828	0.955	43.384	4139	1.113	0.898	0.915	0.228016
79	IFT88_KAN487-2_2.tif:0014-0939	1.006	155.969	0	525	79.968	96.154	0.941	156.945	14973	1.169	0.856	0.923	0.824855
80	IFT88_KAN487-2_2.tif:0015-1013	1.174	245.679	0	1182	14.54	103.778	0.899	288.419	27516	1.306	0.765	0.937	1.51584
81	IFT88_KAN487-2_3.tif:0001-0117	1.205	203.835	0	1195	114.817	12.003	0.912	245.705	23441	1.17	0.855	0.913	1.29135
82	IFT88_KAN487-2_3.tif:0002-0183	1.163	114.568	0	772	83.529	18.72	0.881	133.298	12717	1.407	0.711	0.917	0.700573
83	IFT88_KAN487-2_3.tif:0003-0285	1.226	169.436	0	963	45.252	29.169	0.928	207.792	19824	1.204	0.831	0.925	1.09209
84	IFT88_KAN487-2_3.tif:0004-0325	1.363	246.977	0	1948	122.034	33.305	0.865	336.541	32107	1.648	0.607	0.919	1.76876
85	IFT88_KAN487-2_3.tif:0005-0446	1.268	109.215	0	654	73.22	45.678	0.814	138.518	13215	1.542	0.648	0.89	0.728008
86	IFT88_KAN487-2_3.tif:0006-0552	1.006	67.583	0	239	97.091	56.557	0.941	68.006	6488	1.069	0.935	0.919	0.357421
87	IFT88_KAN487-2_3.tif:0007-0569	1.069	158.912	0	1060	11.882	58.259	0.938	169.9	16209	1.214	0.823	0.927	0.892946
88	IFT88_KAN487-2_3.tif:0008-0699	1.069	192.794	0	1210	49.671	71.548	0.909	206.126	19665	1.263	0.792	0.936	1.08334
89	IFT88_KAN487-2_3.tif:0009-0758	1.101	43.448	0	192	137.274	77.652	0.884	47.818	4562	1.429	0.7	0.909	0.251318
90	IFT88_KAN487-2_3.tif:0010-0800	1.499	178.608	0	1127	109.525	81.858	0.76	267.717	25541	1.543	0.648	0.875	1.40704
91	IFT88_KAN487-2_3.tif:0011-0874	1.163	161.369	0	1012	51.671	89.482	0.947	187.751	17912	1.101	0.908	0.953	0.986763
92	IFT88_KAN487-2_3.tif:0012-0996	1.132	243.269	0	1544	113.882	102.022	0.95	275.39	26273	1.133	0.883	0.927	1.44737
93	IFT88_KAN487-2_4.tif:0001-0100	0.964	159.304	0	691	133.283	10.223	0.964	153.622	14656	1.24	0.807	0.911	0.807392
94	IFT88_KAN487-2_4.tif:0002-0234	0.807	83.948	0	296	130.18	23.98	0.937	67.755	6464	1.416	0.706	0.939	0.356099
95	IFT88_KAN487-2_4.tif:0003-0238	0.86	156.598	0	792	86.986	24.382	0.854	134.598	12841	1.636	0.611	0.937	0.707404
96	IFT88_KAN487-2_4.tif:0004-0270	0.943	161.656	0	945	55.916	27.693	0.957	152.501	14549	1.417	0.706	0.942	0.801497
97	IFT88_KAN487-2_4.tif:0005-0318	0.996	128.842	0	447	12.751	32.585	0.932	128.298	12240	1.232	0.812	0.927	0.674296
98	IFT88_KAN487-2_4.tif:0006-0342	0.681	147.123	0	529	125.487	35.072	0.99	100.238	9563	1.114	0.898	0.963	0.526821
99	IFT88_KAN487-2_4.tif:0007-0417	1.017	180.299	0	974	93.279	42.699	0.983	183.317	17489	1.289	0.776	0.928	0.963461
100	IFT88_KAN487-2_4.tif:0008-0573	0.839	211.975	0	934	20.192	58.634	0.862	177.751	16958	1.566	0.638	0.93	0.934208
101	IFT88_KAN487-2_4.tif:0009-0588	0.639	115.082	0	497	41.522	60.199	0.929	73.583	7020	1.503	0.665	0.938	0.386728
102	IFT88_KAN487-2_4.tif:0010-0706	1.101	182.486	0	1145	90.54	72.278	0.953	200.843	19161	1.153	0.867	0.933	1.05557
103	IFT88_KAN487-2_4.tif:0011-0752	1.101	188	0	1114	10.358	77.038	0.924	206.912	19740	1.147	0.872	0.909	1.08747
104	IFT88_KAN487-2_4.tif:0012-0924	1.111	344.934	0	1958	102.468	94.667	0.962	383.248	36563	1.366	0.732	0.938	2.01424
105	IFT88_KAN487-2_5.tif:0001-0093	1.069	205.765	0	1221	51.307	9.568	0.844	219.993	20988	1.272	0.786	0.895	1.15622
106	IFT88_KAN487-2_5.tif:0002-0094	1.488	346.585	0	2489	105.061	9.657	0.851	515.865	49215	1.857	0.539	0.95	2.71123
107	IFT88_KAN487-2_5.tif:0003-0096	1.331	213.874	0	1557	134.999	9.885	0.913	284.708	27162	1.313	0.761	0.927	1.49634
108	IFT88_KAN487-2_5.tif:0004-0198	0.964	195.033	0	927	2.402	20.34	0.927	188.076	17943	1.213	0.824	0.968	0.988471
109	IFT88_KAN487-2_5.tif:0005-0231	1.457	227.295	0	1349	141.063	23.644	0.784	331.164	31594	1.531	0.653	0.869	1.7405
110	IFT88_KAN487-2_5.tif:0006-0341	0.713	123.956	0	401	99.269	34.978	0.941	88.352	8429	1.307	0.765	0.938	0.46435
111	IFT88_KAN487-2_5.tif:0007-0374	0.943	68.511	0	293	12.551	38.271	0.99	64.631	6166	1.202	0.832	0.933	0.339682
112	IFT88_KAN487-2_5.tif:0008-0417	0.996	208.095	0	1371	93.105	42.708	0.862	207.216	19769	1.284	0.779	0.884	1.08906
113	IFT88_KAN487-2_5.tif:0009-0509	1.059	71.98	0	343	24.522	52.133	0.917	76.203	7270	1.222	0.819	0.91	0.400501
114	IFT88_KAN487-2_5.tif:0010-0579	1.352	173.744	0	1233	97.804	59.34	0.845	234.93	22413	1.36	0.735	0.905	1.23472
115	IFT88_KAN487-2_5.tif:0011-0727	1.373	141.038	0	1017	48.094	74.488	0.805	193.663	18476	1.653	0.605	0.913	1.01783
116	IFT88_KAN487-2_5.tif:0012-0733	0.996	160.895	0	819	6.388	75.136	0.902	160.215	15285	1.552	0.644	0.931	0.842043
117	IFT88_KAN487-2_5.tif:0013-0837	1.499	226.448	0	1870	131.394	85.771	0.87	339.424	32382	1.493	0.67	0.923	1.78391
118	IFT88_KAN487-2_5.tif:0014-0989	1.52	227.338	0	1617	79.783	101.396	0.711	345.524	32964	1.293	0.773	0.826	1.81597
119	IFT88_KAN487-2_5.tif:0015-1001	0.996	197.979	0	1029	16.8	102.525	0.944	197.143	18808	1.135	0.881	0.941	1.03612
120	IFT88_KAN487-2_6.tif:0001-0104	0.912	306.517	0	1410	5.035	10.687	0.894	279.52	26667	1.336	0.748	0.902	1.46907
121	IFT88_KAN487-2_6.tif:0002-0105	1.216	146.112	0	893	75.351	10.779	0.858	177.657	16949	1.47	0.68	0.91	0.933712
122	IFT88_KAN487-2_6.tif:0003-0221	1.038	253.727	0	1587	116.287	22.694	0.91	263.294	25119	1.445	0.692	0.938	1.38379
123	IFT88_KAN487-2_6.tif:0004-0282	1.583	138.073	0	1104	43.769	28.824	0.795	218.536	20849	1.583	0.632	0.886	1.14856
124	IFT88_KAN487-2_6.tif:0005-0348	1.027	221.378	0	1299	107.254	35.664	0.873	227.404	21695	1.464	0.683	0.92	1.19517
125	IFT88_KAN487-2_6.tif:0006-0438	0.828	221.418	0	971	9.12	44.871	0.927	183.349	17492	1.139	0.878	0.952	0.963626
126	IFT88_KAN487-2_6.tif:0007-0502	1.059	124.158	0	927	66.945	51.4	0.929	131.443	12540	1.269	0.788	0.931	0.690823
127	IFT88_KAN487-2_6.tif:0008-0516	1.111	235.547	0	1452	123.588	52.851	0.893	261.711	24968	1.27	0.788	0.918	1.37548
128	IFT88_KAN487-2_6.tif:0009-0686	0.933	119.36	0	631	74.521	70.189	0.873	111.349	10623	1.33	0.752	0.918	0.585216
129	IFT88_KAN487-2_6.tif:0010-0731	0.964	133.348	0	647	7.104	74.872	0.873	128.591	12268	1.123	0.89	0.889	0.675838
130	IFT88_KAN487-2_6.tif:0011-0826	1.216	203.379	0	1339	129.603	84.615	0.92	247.288	23592	1.355	0.738	0.932	1.29967
131	IFT88_KAN487-2_6.tif:0012-0900	0.975	121.903	0	720	23.917	92.227	0.866	118.833	11337	1.406	0.711	0.949	0.62455
										17065.2				0.940113
132	IFT88_KAN487-3_1.tif:0001-0058	1.027	165.173	0	882	126.573	5.979	0.901	169.67	16187	1.023	0.977	0.916	0.891734
133	IFT88_KAN487-3_1.tif:0002-0129	0.912	132	0	855	99.882	13.197	0.837	120.374	11484	1.699	0.588	0.941	0.632648
134	IFT88_KAN487-3_1.tif:0003-0176	0.88	122.464	0	559	15.048	18.029	0.992	107.827	10287	1.113	0.899	0.918	0.566706
135	IFT88_KAN487-3_1.tif:0004-0270	1.216	155.086	0	875	52.869	27.698	0.92	188.569	17990	1.084	0.922	0.921	0.99106
136	IFT88_KAN487-3_1.tif:0005-0312	0.975	87.71	0	231	86.533	31.892	0.924	85.501	8157	1.366	0.732	0.954	0.449365
137	IFT88_KAN487-3_1.tif:0006-0410	1.09	164.904	0	883	140.475	42.005	0.956	179.764	17150	1.156	0.865	0.95	0.944785
138	IFT88_KAN487-3_1.tif:0007-0414	0.912	103.782	0	550	68.974	42.444	0.957	94.641	9029	1.303	0.767	0.93	0.497403
139	IFT88_KAN487-3_1.tif:0008-0431	0.964	116.261	0	649	36.893	44.206	0.82	112.114	10696	1.21	0.826	0.889	0.589237
140	IFT88_KAN487-3_1.tif:0009-0447	1.069	176.127	0	825	14.188	45.804	0.926	188.307	17965	1.378	0.725	0.923	0.989683
141	IFT88_KAN487-3_1.tif:0010-0541	1.059	156.248	0	662	127.912	55.449	0.929	165.414	15781	1.089	0.918	0.931	0.869368
142	IFT88_KAN487-3_1.tif:0011-0650	1.122	257.486	0	1402	97.709	66.546	0.953	288.786	27551	1.205	0.83	0.96	1.51777
143	IFT88_KAN487-3_1.tif:0012-0742	1.247	286.731	0	1451	89.923	76.052	0.856	357.652	34121	1.068	0.936	0.905	1.87971
144	IFT88_KAN487-3_1.tif:0013-0749	0.922	125.716	0	579	18.785	76.725	0.935	115.961	11063	1.351	0.74	0.931	0.609455
145	IFT88_KAN487-3_1.tif:0014-0757	1.321	194.563	0	1387	118.79	77.473	0.871	256.963	24515	1.292	0.774	0.913	1.35052
146	IFT88_KAN487-3_1.tif:0015-0760	1.289	206.276	0	984	40.865	77.801	0.86	265.946	25372	1.378	0.726	0.928	1.39773
147	IFT88_KAN487-3_1.tif:0016-0795	1.163	74.505	0	264	56.937	81.366	0.821	86.685	8270	1.531	0.653	0.888	0.45559
148	IFT88_KAN487-3_1.tif:0017-0914	1.006	188.906	0	509	16.74	93.607	1	190.089	18135	1.084	0.922	0.928	0.999048
149	IFT88_KAN487-3_1.tif:0018-1027	1.184	99.088	0	414	123.942	105.177	0.896	117.365	11197	1.29	0.775	0.922	0.616837
150	IFT88_KAN487-3_2.tif:0001-0136	0.964	200.707	0	827	134.443	13.944	0.885	193.548	18465	1.47	0.68	0.939	1.01723
151	IFT88_KAN487-3_2.tif:0002-0145	0.797	105.658	0	377	79.364	14.872	0.996	84.169	8030	1.088	0.919	0.944	0.442369
152	IFT88_KAN487-3_2.tif:0003-0172	1.101	97.6	0	451	23.112	17.599	0.953	107.418	10248	1.222	0.819	0.917	0.564557
153	IFT88_KAN487-3_2.tif:0004-0374	1.09	88.702	0	907	47.713	38.263	0.876	96.695	9225	1.279	0.782	0.912	0.508201
154	IFT88_KAN487-3_2.tif:0005-0509	1.499	200.196	0	1672	115.126	52.104	0.87	300.075	28628	1.394	0.717	0.905	1.5771
155	IFT88_KAN487-3_2.tif:0006-0575	1.038	220.414	0	868	33.35	58.934	0.927	228.725	21821	1.327	0.754	0.908	1.20211
156	IFT88_KAN487-3_2.tif:0007-0588	1.143	127.064	0	578	88.994	60.197	0.946	145.174	13850	1.178	0.849	0.912	0.76299
157	IFT88_KAN487-3_2.tif:0008-0610	1.069	291.343	0	1074	140.465	62.48	0.955	311.489	29717	1.095	0.913	0.923	1.6371
158	IFT88_KAN487-3_2.tif:0009-0685	1.279	162.975	0	1153	59.175	70.074	0.94	208.411	19883	1.103	0.907	0.953	1.09534
159	IFT88_KAN487-3_2.tif:0010-0868	1.195	197.447	0	1212	33.983	88.868	0.868	235.936	22509	1.198	0.835	0.898	1.24001
160	IFT88_KAN487-3_2.tif:0011-0900	1.122	169.561	0	598	88.168	92.201	0.971	190.172	18143	1.099	0.91	0.926	0.999489
161	IFT88_KAN487-3_2.tif:0012-1005	1.09	181.288	0	1114	22.378	102.956	0.987	197.625	18854	1.182	0.846	0.95	1.03866
162	IFT88_KAN487-3_3.tif:0001-0044	0.86	100.183	0	411	119.515	4.509	0.983	86.108	8215	1.084	0.923	0.927	0.45256
163	IFT88_KAN487-3_3.tif:0002-0262	0.744	204.155	0	811	128.408	26.881	0.864	151.935	14495	1.149	0.87	0.887	0.798523
164	IFT88_KAN487-3_3.tif:0003-0315	0.922	261.545	0	1201	91.281	32.234	0.728	241.25	23016	2.029	0.493	0.85	1.26794
165	IFT88_KAN487-3_3.tif:0004-0509	1.038	169.081	0	751	42.335	52.136	0.971	175.456	16739	1.055	0.948	0.934	0.922143
166	IFT88_KAN487-3_3.tif:0005-0609	0.964	204.62	0	1238	69.855	62.398	0.945	197.321	18825	1.078	0.928	0.939	1.03706
167	IFT88_KAN487-3_3.tif:0006-0614	1.027	250.48	0	1459	99.476	62.906	0.993	257.298	24547	1.059	0.944	0.938	1.35228
168	IFT88_KAN487-3_3.tif:0007-0760	0.943	99.878	0	850	52.818	77.905	0.895	94.221	8989	1.143	0.875	0.914	0.4952
169	IFT88_KAN487-3_3.tif:0008-0860	1.3	200.218	0	1236	78.673	88.003	0.917	260.233	24827	1.358	0.736	0.925	1.36771
170	IFT88_KAN487-3_3.tif:0009-0944	0.943	158.6	0	652	20.077	96.673	0.99	149.618	14274	1.113	0.899	0.938	0.786348
171	IFT88_KAN487-3_3.tif:0010-1018	1.478	318.759	0	1348	118.409	104.309	0.824	471.107	44945	1.343	0.745	0.895	2.476
172	IFT88_KAN487-3_4.tif:0001-0033	0.964	60.837	0	286	124.086	3.396	0.902	58.667	5597	1.361	0.735	0.915	0.308336
173	IFT88_KAN487-3_4.tif:0002-0075	0.818	271.872	0	1108	29.173	7.68	0.915	222.278	21206	1.34	0.746	0.951	1.16823
174	IFT88_KAN487-3_4.tif:0003-0158	1.3	197.669	0	1447	5.974	16.142	0.917	256.921	24511	1.226	0.816	0.922	1.3503
175	IFT88_KAN487-3_4.tif:0004-0224	0.943	165.056	0	777	102.127	22.947	0.882	155.708	14855	1.328	0.753	0.891	0.818355
176	IFT88_KAN487-3_4.tif:0005-0334	0.818	36.667	0	252	27.39	34.256	0.984	29.978	2860	1.137	0.879	0.951	0.157556
177	IFT88_KAN487-3_4.tif:0006-0457	1.457	224.237	0	1246	112.011	46.764	0.901	326.709	31169	1.265	0.791	0.924	1.71709
178	IFT88_KAN487-3_4.tif:0007-0616	1.153	207.555	0	1368	56.741	63.091	0.91	239.311	22831	1.367	0.731	0.928	1.25775
179	IFT88_KAN487-3_4.tif:0008-0670	1.268	274.769	0	1784	43.025	68.696	0.895	348.49	33247	1.354	0.739	0.924	1.83156
180	IFT88_KAN487-3_4.tif:0009-0679	1.446	198.877	0	1293	116.671	69.628	0.827	287.675	27445	1.418	0.705	0.893	1.51193
181	IFT88_KAN487-3_4.tif:0010-0811	1.216	125.759	0	460	105.299	83.031	0.96	152.909	14588	1.085	0.922	0.951	0.803646
182	IFT88_KAN487-3_4.tif:0011-0818	0.901	66.744	0	221	67.857	83.825	0.946	60.166	5740	1.189	0.841	0.91	0.316214
183	IFT88_KAN487-3_4.tif:0012-0839	1.048	185.4	0	1081	26.953	85.866	0.88	194.334	18540	1.337	0.748	0.893	1.02136
184	IFT88_KAN487-3_4.tif:0013-0987	0.891	124.565	0	558	3.132	101.047	0.949	110.982	10588	1.102	0.908	0.934	0.583288
185	IFT88_KAN487-3_4.tif:0014-0996	0.985	119.149	0	437	44.036	102.052	0.966	117.397	11200	1.148	0.871	0.945	0.617003
186	IFT88_KAN487-3_4.tif:0015-1000	1.646	319.089	0	1761	125.727	102.461	0.788	525.11	50097	1.399	0.715	0.867	2.75982
187	IFT88_KAN487-3_5.tif:0001-0050	1.268	248.025	0	1668	56.273	5.133	0.948	314.571	30011	1.154	0.866	0.927	1.65329
188	IFT88_KAN487-3_5.tif:0002-0130	1.467	490.643	0	3234	140.814	13.341	0.893	719.999	68690	1.274	0.785	0.94	3.7841
189	IFT88_KAN487-3_5.tif:0003-0217	0.87	265.807	0	1017	83.283	22.216	0.959	231.251	22062	1.037	0.965	0.938	1.21538
190	IFT88_KAN487-3_5.tif:0004-0292	0.755	230.333	0	844	82.562	29.945	0.909	173.831	16584	1.237	0.808	0.923	0.913605
191	IFT88_KAN487-3_5.tif:0005-0315	1.153	180.618	0	1259	22.644	32.21	0.926	208.254	19868	1.011	0.989	0.905	1.09452
192	IFT88_KAN487-3_5.tif:0006-0395	1.027	163.622	0	992	116.021	40.489	0.901	168.077	16035	1.463	0.683	0.929	0.88336
193	IFT88_KAN487-3_5.tif:0007-0512	1.289	423.431	0	2106	32.054	52.519	0.793	545.916	52082	1.784	0.56	0.935	2.86917
194	IFT88_KAN487-3_5.tif:0008-0520	1.101	103.867	0	435	118.669	53.283	0.912	114.315	10906	1.162	0.861	0.909	0.600806
195	IFT88_KAN487-3_5.tif:0009-0574	1.216	159.586	0	933	77.047	58.75	0.965	194.04	18512	1.211	0.826	0.928	1.01982
196	IFT88_KAN487-3_5.tif:0010-0641	0.849	88.531	0	340	54.24	65.684	0.923	75.165	7171	1.608	0.622	0.915	0.395047
197	IFT88_KAN487-3_5.tif:0011-0742	1.426	169.287	0	1214	129.472	75.907	0.827	241.324	23023	1.146	0.873	0.863	1.26833
198	IFT88_KAN487-3_5.tif:0012-0747	1.216	185.19	0	1138	82.44	76.533	0.858	225.171	21482	1.551	0.645	0.906	1.18343
199	IFT88_KAN487-3_5.tif:0013-0783	0.985	109.096	0	391	51.01	80.219	0.922	107.491	10255	1.145	0.873	0.908	0.564943
200	IFT88_KAN487-3_5.tif:0014-0900	1.258	258.6	0	1531	6.025	92.17	0.925	325.273	31032	1.041	0.96	0.927	1.70954
201	IFT88_KAN487-3_5.tif:0015-0928	1.195	216.193	0	932	44.502	95.042	0.893	258.336	24646	1.443	0.693	0.905	1.35774
202	IFT88_KAN487-3_5.tif:0016-0950	0.996	95.758	0	468	124.392	97.241	0.902	95.353	9097	1.189	0.841	0.896	0.501149
203	IFT88_KAN487-3_5.tif:0017-1001	1.436	255.146	0	1853	110.028	102.531	0.864	366.393	34955	1.2	0.833	0.895	1.92565
204	IFT88_KAN487-3_6.tif:0001-0069	0.818	119.449	0	523	0.923	7.129	0.984	97.659	9317	1.115	0.897	0.945	0.513269
205	IFT88_KAN487-3_6.tif:0002-0093	1.216	160.284	0	1083	86.12	9.504	0.894	194.889	18593	1.146	0.872	0.928	1.02428
206	IFT88_KAN487-3_6.tif:0003-0108	1.226	265.188	0	1331	118.054	11.04	0.901	325.221	31027	1.511	0.662	0.947	1.70926
207	IFT88_KAN487-3_6.tif:0004-0181	1.143	248.908	0	1261	46.498	18.529	0.942	284.383	27131	1.2	0.833	0.96	1.49463
208	IFT88_KAN487-3_6.tif:0005-0201	1.321	254.944	0	1394	58.235	20.544	0.921	336.709	32123	1.218	0.821	0.91	1.76964
209	IFT88_KAN487-3_6.tif:0006-0382	0.943	221.2	0	897	88.626	39.11	0.938	208.673	19908	1.053	0.95	0.957	1.09672
210	IFT88_KAN487-3_6.tif:0007-0397	0.954	265.527	0	1297	24.644	40.658	0.967	253.273	24163	1.113	0.898	0.933	1.33113
211	IFT88_KAN487-3_6.tif:0008-0434	1.205	184.191	0	1177	71.718	44.486	0.876	222.027	21182	1.331	0.751	0.909	1.16691
212	IFT88_KAN487-3_6.tif:0009-0565	0.818	177.949	0	990	114.276	57.791	0.902	145.488	13880	1.157	0.864	0.902	0.764642
213	IFT88_KAN487-3_6.tif:0010-0662	1.101	91.886	0	449	11.957	67.741	0.953	101.129	9648	1.232	0.812	0.933	0.531504
214	IFT88_KAN487-3_6.tif:0011-0775	1.446	153.899	0	1102	46.166	79.33	0.884	222.614	21238	1.238	0.808	0.89	1.16999
215	IFT88_KAN487-3_6.tif:0012-0789	1.3	199.379	0	1085	79.299	80.727	0.917	259.143	24723	1.326	0.754	0.936	1.36198
216	IFT88_KAN487-3_6.tif:0013-0804	1.331	153.11	0	877	130.045	82.361	0.868	203.82	19445	1.394	0.717	0.898	1.07122
217	IFT88_KAN487-3_6.tif:0014-0871	1.289	107.789	0	615	97.152	89.186	0.818	138.968	13258	1.605	0.623	0.895	0.730377
218	IFT88_KAN487-3_6.tif:0015-0904	1.247	265.571	0	1570	125.398	92.611	0.944	331.258	31603	1.052	0.951	0.937	1.74099
219	IFT88_KAN487-3_6.tif:0016-1026	1.132	167.528	0	939	23.359	105.051	0.905	189.648	18093	1.236	0.809	0.956	0.996735
										19993.3				1.10142
220	IFT88_KAN487-4_1.tif:0001-0252	1.174	32.884	0	442	84.588	25.792	0.889	38.605	3683	1.538	0.65	0.929	0.202895
221	IFT88_KAN487-4_1.tif:0002-0269	1.446	138.978	0	622	122.724	27.546	0.839	201.032	19179	1.62	0.617	0.887	1.05656
222	IFT88_KAN487-4_1.tif:0003-0324	1.174	91.536	0	761	54.507	33.225	0.889	107.46	10252	1.478	0.677	0.922	0.564778
223	IFT88_KAN487-4_1.tif:0004-0357	1.163	208.207	0	1215	100.417	36.682	0.831	242.246	23111	1.592	0.628	0.933	1.27317
224	IFT88_KAN487-4_1.tif:0005-0530	1.153	154.218	0	940	58.528	54.255	0.915	177.814	16964	1.395	0.717	0.894	0.934539
225	IFT88_KAN487-4_1.tif:0006-0539	1.174	117.321	0	628	81.337	55.171	0.904	137.732	13140	1.305	0.766	0.907	0.723876
226	IFT88_KAN487-4_1.tif:0007-0565	0.755	134.403	0	415	12.078	57.844	0.958	101.433	9677	1.239	0.807	0.954	0.533101
227	IFT88_KAN487-4_1.tif:0008-0672	1.09	173.385	0	898	43.932	68.893	0.915	189.009	18032	1.249	0.801	0.929	0.993374
228	IFT88_KAN487-4_1.tif:0009-0830	1.184	347.779	0	1805	126.898	85.003	0.935	411.927	39299	1.201	0.833	0.942	2.16496
229	IFT88_KAN487-4_1.tif:0010-0933	1.184	196.558	0	1067	77.935	95.555	0.923	232.813	22211	1.143	0.875	0.915	1.22359
230	IFT88_KAN487-4_2.tif:0001-0034	1.31	212.168	0	1161	35.901	3.537	0.819	277.989	26521	1.251	0.799	0.883	1.46103
231	IFT88_KAN487-4_2.tif:0002-0183	1.184	216.77	0	1233	119.031	18.765	0.846	256.753	24495	1.449	0.69	0.922	1.34942
232	IFT88_KAN487-4_2.tif:0003-0219	0.901	153.907	0	924	91.273	22.421	0.974	138.738	13236	1.11	0.901	0.977	0.729165
233	IFT88_KAN487-4_2.tif:0004-0286	0.713	31.941	0	265	71.204	29.319	0.905	22.767	2172	1.072	0.933	0.919	0.119654
234	IFT88_KAN487-4_2.tif:0005-0419	0.86	131.171	4	408	135.08	42.97	0.983	112.743	10756	1.24	0.807	0.937	0.592543
235	IFT88_KAN487-4_2.tif:0006-0431	1.174	185.509	0	966	7.353	44.073	0.878	217.782	20777	1.632	0.613	0.918	1.14459
236	IFT88_KAN487-4_2.tif:0007-0459	0.88	236.548	0	996	56.568	47.046	0.906	208.275	19870	1.307	0.765	0.923	1.09463
237	IFT88_KAN487-4_2.tif:0008-0594	1.101	237.448	0	1166	67.181	60.789	1	261.334	24932	1.083	0.924	0.938	1.37349
238	IFT88_KAN487-4_2.tif:0009-0778	1.279	254.385	0	1614	103.864	79.714	0.956	325.304	31035	1.071	0.934	0.928	1.7097
239	IFT88_KAN487-4_2.tif:0010-0788	1.038	213.616	0	1239	43.658	80.707	0.94	221.67	21148	1.426	0.701	0.943	1.16503
240	IFT88_KAN487-4_2.tif:0011-0914	1.143	195.697	0	1245	126.288	93.515	0.865	223.589	21331	1.408	0.71	0.912	1.17511
241	IFT88_KAN487-4_2.tif:0012-0949	1.122	182.654	0	758	81.727	97.211	0.941	204.857	19544	1.141	0.876	0.922	1.07667
242	IFT88_KAN487-4_2.tif:0013-0962	1.247	318.723	0	2039	113.154	98.464	0.902	397.556	37928	1.207	0.828	0.96	2.08944
243	IFT88_KAN487-4_2.tif:0014-0967	1.163	243.045	0	1421	22.247	99.036	0.896	282.78	26978	1.104	0.905	0.871	1.4862
244	IFT88_KAN487-4_2.tif:0015-1033	0.818	141.179	0	1331	64.97	105.812	0.87	115.426	11012	1.48	0.676	0.923	0.606646
245	IFT88_KAN487-4_3.tif:0001-0026	0.912	208.828	0	1090	138.056	2.792	0.81	190.434	18168	1.282	0.78	0.902	1.00087
246	IFT88_KAN487-4_3.tif:0002-0149	0.912	143.839	0	878	29.453	15.247	0.971	131.17	12514	1.036	0.965	0.941	0.68939
247	IFT88_KAN487-4_3.tif:0003-0162	1.184	133.602	0	918	71.861	16.631	0.886	158.245	15097	1.353	0.739	0.89	0.831686
248	IFT88_KAN487-4_3.tif:0004-0232	0.933	102.169	0	694	128.919	23.746	0.959	95.312	9093	1.025	0.976	0.952	0.500929
249	IFT88_KAN487-4_3.tif:0005-0493	0.975	83.71	0	650	37.539	50.553	0.883	81.601	7785	1.126	0.888	0.903	0.428872
250	IFT88_KAN487-4_3.tif:0006-0521	0.901	46.733	0	167	122.87	53.34	0.901	42.127	4019	1.622	0.616	0.905	0.221405
251	IFT88_KAN487-4_3.tif:0007-0708	1.122	189.561	0	1177	46.104	72.437	0.901	212.604	20283	1.383	0.723	0.903	1.11738
252	IFT88_KAN487-4_3.tif:0008-0754	1.426	214.596	0	1403	115.144	77.182	0.915	305.913	29185	1.2	0.833	0.925	1.60779
253	IFT88_KAN487-4_3.tif:0009-0795	1.006	77.979	0	667	84.235	81.383	0.844	78.467	7486	1.464	0.683	0.897	0.4124
254	IFT88_KAN487-4_3.tif:0010-1017	0.954	55.868	0	197	46.255	104.186	0.922	53.29	5084	1.212	0.825	0.901	0.280075
255	IFT88_KAN487-4_4.tif:0001-0134	1.415	217.659	0	1518	61.24	13.695	0.83	307.999	29384	1.351	0.74	0.903	1.61875
256	IFT88_KAN487-4_4.tif:0002-0152	0.985	212.138	0	874	99.284	15.652	0.934	209.019	19941	1.357	0.737	0.949	1.09854
257	IFT88_KAN487-4_4.tif:0003-0306	1.226	152.154	0	1226	125.668	31.377	0.866	186.598	17802	1.284	0.779	0.89	0.980704
258	IFT88_KAN487-4_4.tif:0004-0517	0.86	69.524	0	677	6.495	52.94	0.884	59.757	5701	1.102	0.907	0.916	0.314065
259	IFT88_KAN487-4_4.tif:0005-0543	1.384	257.379	0	1803	25.197	55.637	0.811	356.111	33974	1.837	0.544	0.91	1.87161
260	IFT88_KAN487-4_4.tif:0006-0573	0.744	173.887	0	734	41.328	58.646	0.91	129.409	12346	1.214	0.824	0.959	0.680135
261	IFT88_KAN487-4_4.tif:0007-0602	1.289	152.033	0	811	81.025	61.695	0.874	196.011	18700	1.104	0.906	0.882	1.03017
262	IFT88_KAN487-4_4.tif:0008-0600	0.912	388.563	0	1775	118.671	61.436	0.877	354.339	33805	1.298	0.77	0.951	1.8623
263	IFT88_KAN487-4_4.tif:0009-0812	0.975	89.312	0	324	1.182	83.149	0.943	87.062	8306	1.285	0.778	0.935	0.457574
264	IFT88_KAN487-4_4.tif:0010-0886	1.08	149.718	0	735	116.633	90.751	0.918	161.641	15421	1.445	0.692	0.945	0.849535
265	IFT88_KAN487-4_4.tif:0011-0914	1.31	178.648	0	1177	78.16	93.536	0.952	234.07	22331	1.121	0.892	0.933	1.2302
266	IFT88_KAN487-4_4.tif:0012-1015	1.153	195.809	0	1132	27.252	103.963	0.91	225.769	21539	1.27	0.787	0.94	1.18657
267	IFT88_KAN487-4_5.tif:0001-0022	0.692	125.394	0	474	12.109	2.336	0.988	86.748	8276	1.113	0.899	0.923	0.455921
268	IFT88_KAN487-4_5.tif:0002-0126	1.279	198.992	0	1270	76.373	12.956	0.903	254.468	24277	1.403	0.713	0.924	1.33741
269	IFT88_KAN487-4_5.tif:0003-0156	1.216	299.845	0	1827	118.237	15.942	0.834	364.58	34782	1.614	0.62	0.913	1.91612
270	IFT88_KAN487-4_5.tif:0004-0253	1.017	181.031	0	871	14.572	25.928	0.904	184.061	17560	1.342	0.745	0.956	0.967372
271	IFT88_KAN487-4_5.tif:0005-0273	1.09	182.423	0	940	103.365	27.974	0.815	198.862	18972	1.332	0.751	0.849	1.04516
272	IFT88_KAN487-4_5.tif:0006-0286	0.975	188.226	0	989	54.965	29.339	0.956	183.485	17505	1.083	0.923	0.93	0.964342
273	IFT88_KAN487-4_5.tif:0007-0296	1.31	109.432	0	704	65.926	30.284	0.81	143.381	13679	1.749	0.572	0.896	0.753569
274	IFT88_KAN487-4_5.tif:0008-0488	1.132	266.741	0	1431	119.911	49.986	0.867	301.961	28808	1.376	0.727	0.939	1.58702
275	IFT88_KAN487-4_5.tif:0009-0658	1.163	182.306	0	1005	44.855	67.392	0.935	212.111	20236	1.231	0.812	0.917	1.11479
276	IFT88_KAN487-4_5.tif:0010-0668	0.776	180.473	0	650	2.894	68.421	0.969	139.985	13355	1.099	0.91	0.931	0.73572
277	IFT88_KAN487-4_5.tif:0011-0715	1.352	289.264	0	1432	98.554	73.216	0.845	391.131	37315	1.55	0.645	0.928	2.05567
278	IFT88_KAN487-4_5.tif:0012-0864	1.331	205.835	0	1231	118.576	88.415	0.903	274.006	26141	1.251	0.799	0.907	1.4401
279	IFT88_KAN487-4_5.tif:0013-0966	1.478	152.39	0	1223	72.09	98.823	0.815	225.224	21487	1.398	0.715	0.898	1.18371
280	IFT88_KAN487-4_5.tif:0014-0991	0.985	117	0	615	49.834	101.45	0.922	115.279	10998	1.221	0.819	0.908	0.605874
281	IFT88_KAN487-4_6.tif:0001-0136	1.143	160.862	0	1053	123.713	13.976	0.784	183.789	17534	1.842	0.543	0.901	0.96594
282	IFT88_KAN487-4_6.tif:0002-0164	1.038	266.273	0	1159	20.671	16.781	0.855	276.312	26361	1.276	0.784	0.917	1.45221
283	IFT88_KAN487-4_6.tif:0003-0202	0.954	256.538	0	1201	62.163	20.742	0.967	244.699	23345	1.306	0.765	0.938	1.28606
284	IFT88_KAN487-4_6.tif:0004-0294	1.195	220.009	0	1149	29.417	30.157	0.82	262.896	25081	1.26	0.794	0.887	1.3817
285	IFT88_KAN487-4_6.tif:0005-0359	1.426	192.39	0	1091	138.847	36.764	0.881	274.258	26165	1.262	0.792	0.901	1.44142
286	IFT88_KAN487-4_6.tif:0006-0525	1.247	208.714	0	1133	76.64	53.825	0.917	260.338	24837	1.198	0.835	0.93	1.36826
287	IFT88_KAN487-4_6.tif:0007-0548	1.059	196.218	0	1167	107.127	56.139	0.788	207.729	19818	1.765	0.567	0.91	1.09176
288	IFT88_KAN487-4_6.tif:0008-0562	1.205	175.313	0	1032	9.152	57.55	0.94	211.325	20161	1.236	0.809	0.935	1.11066
289	IFT88_KAN487-4_6.tif:0009-0590	1.698	240.13	0	1196	44.325	60.359	0.824	407.755	38901	1.093	0.915	0.866	2.14304
290	IFT88_KAN487-4_6.tif:0010-0607	0.901	122.849	0	496	138.654	62.186	0.994	110.741	10565	1.291	0.775	0.95	0.582021
291	IFT88_KAN487-4_6.tif:0011-0816	0.755	40.542	0	198	9.611	83.591	0.909	30.597	2919	1.276	0.784	0.9	0.160806
292	IFT88_KAN487-4_6.tif:0012-0901	1.446	141.536	0	1168	68.011	92.302	0.839	204.732	19532	1.607	0.622	0.911	1.07601
293	IFT88_KAN487-4_6.tif:0013-0996	1.352	185.651	0	1596	132.221	101.992	0.917	251.03	23949	1.078	0.928	0.908	1.31934
294	IFT88_KAN487-4_6.tif:0014-1001	1.268	190.694	0	1105	29.363	102.551	0.921	241.858	23074	1.371	0.729	0.924	1.27114
										19345.1				1.06571
295	IFT88_KAN487-5_1.tif:0001-0020	1.499	200.832	0	1030	137.206	2.155	0.827	301.029	28719	1.733	0.577	0.935	1.58212
296	IFT88_KAN487-5_1.tif:0002-0131	0.964	237.087	0	1292	39.919	13.402	0.873	228.63	21812	1.536	0.651	0.911	1.20161
297	IFT88_KAN487-5_1.tif:0003-0332	1.006	155.344	0	566	96.984	34.029	0.973	156.316	14913	1.026	0.975	0.928	0.82155
298	IFT88_KAN487-5_1.tif:0004-0461	1.08	159.874	0	919	35.747	47.171	0.89	172.605	16467	1.26	0.794	0.936	0.907159
299	IFT88_KAN487-5_1.tif:0005-0519	0.912	145.828	0	693	79.387	53.218	0.882	132.983	12687	1.502	0.666	0.892	0.698921
300	IFT88_KAN487-5_1.tif:0006-0525	1.059	202.149	0	784	125.557	53.843	0.9	214.008	20417	1.435	0.697	0.94	1.12476
301	IFT88_KAN487-5_1.tif:0007-0616	1.247	198.992	0	1331	91.396	63.143	0.933	248.21	23680	1.293	0.773	0.915	1.30452
302	IFT88_KAN487-5_1.tif:0008-0615	0.828	135.367	0	874	57.606	63.034	0.947	112.093	10694	1.289	0.776	0.913	0.589127
303	IFT88_KAN487-5_1.tif:0009-0721	0.996	132.905	0	661	18.439	73.827	0.902	132.344	12626	1.22	0.82	0.909	0.69556
304	IFT88_KAN487-5_1.tif:0010-0727	1.048	266.22	0	1283	36.879	74.4	0.891	279.048	26622	1.193	0.838	0.93	1.46659
305	IFT88_KAN487-5_1.tif:0011-0815	0.933	176.607	0	1013	11.448	83.472	0.993	164.754	15718	1.105	0.905	0.957	0.865897
306	IFT88_KAN487-5_1.tif:0012-0932	0.954	228.901	0	841	90.658	95.404	0.935	218.337	20830	1.138	0.879	0.924	1.14751
307	IFT88_KAN487-5_2.tif:0001-0022	0.744	55.451	0	188	30.23	2.295	0.93	41.267	3937	1.383	0.723	0.922	0.216887
308	IFT88_KAN487-5_2.tif:0002-0035	1.006	213.083	0	1021	52.761	3.583	0.911	214.417	20456	1.384	0.722	0.923	1.12691
309	IFT88_KAN487-5_2.tif:0003-0069	1.174	167.375	0	1092	97.673	7.084	0.927	196.493	18746	1.112	0.899	0.945	1.03271
310	IFT88_KAN487-5_2.tif:0004-0250	1.038	151.293	0	796	1.42	25.583	0.94	156.997	14978	1.161	0.861	0.93	0.825131
311	IFT88_KAN487-5_2.tif:0005-0322	1.174	125.393	0	782	34.89	33.005	0.927	147.207	14044	1.066	0.938	0.941	0.773677
312	IFT88_KAN487-5_2.tif:0006-0402	1.111	159.821	0	920	33.563	41.172	0.893	177.573	16941	1.407	0.711	0.91	0.933271
313	IFT88_KAN487-5_2.tif:0007-0424	0.964	99.848	0	341	61.817	43.402	0.945	96.286	9186	1.348	0.742	0.948	0.506052
314	IFT88_KAN487-5_2.tif:0008-0435	1.258	173.533	0	1104	107.84	44.578	0.969	218.274	20824	1.191	0.839	0.92	1.14718
315	IFT88_KAN487-5_2.tif:0009-0467	1.069	148.412	0	822	71.934	47.795	0.938	158.674	15138	1.246	0.803	0.949	0.833945
316	IFT88_KAN487-5_2.tif:0010-0663	1.132	179.991	0	887	88.415	67.892	0.921	203.757	19439	1.318	0.759	0.931	1.07089
317	IFT88_KAN487-5_2.tif:0011-0679	0.912	159.563	0	811	54.102	69.583	0.971	145.509	13882	1.265	0.79	0.946	0.764753
318	IFT88_KAN487-5_2.tif:0012-0735	0.88	165.667	0	550	29.848	75.226	0.992	145.866	13916	1.226	0.816	0.923	0.766626
319	IFT88_KAN487-5_2.tif:0013-0795	0.985	245.489	0	1217	66.213	81.452	0.999	241.879	23076	1.14	0.877	0.945	1.27125
320	IFT88_KAN487-5_2.tif:0014-0905	1.457	176.827	0	1047	131.18	92.632	0.854	257.634	24579	1.085	0.921	0.9	1.35405
321	IFT88_KAN487-5_2.tif:0015-0942	1.3	255.855	0	1548	113.03	96.44	0.955	332.547	31726	1.231	0.812	0.95	1.74777
322	IFT88_KAN487-5_2.tif:0016-0972	0.985	223.415	0	1230	49.64	99.509	0.934	220.13	21001	1.183	0.845	0.945	1.15693
323	IFT88_KAN487-5_3.tif:0001-0114	1.174	351.214	0	1398	64.595	11.698	0.889	412.314	39336	1.438	0.695	0.918	2.167
324	IFT88_KAN487-5_3.tif:0002-0153	1.122	181.346	0	1040	21.595	15.674	0.913	203.39	19404	1.207	0.829	0.926	1.06896
325	IFT88_KAN487-5_3.tif:0003-0301	0.985	169.128	0	772	55.168	30.813	0.934	166.641	15898	1.223	0.818	0.945	0.875813
326	IFT88_KAN487-5_3.tif:0004-0309	1.048	122.23	0	846	94.238	31.651	0.937	128.12	12223	1.297	0.771	0.913	0.673359
327	IFT88_KAN487-5_3.tif:0005-0316	1.027	176.224	0	988	131.593	32.336	0.93	181.022	17270	1.225	0.816	0.933	0.951396
328	IFT88_KAN487-5_3.tif:0006-0336	1.08	133.204	0	470	12.107	34.484	0.978	143.811	13720	1.015	0.986	0.941	0.755828
329	IFT88_KAN487-5_3.tif:0007-0525	1.09	205.76	0	1233	116.021	53.739	0.927	224.301	21399	1.252	0.799	0.945	1.17886
330	IFT88_KAN487-5_3.tif:0008-0623	1.048	275.54	0	1614	61.191	63.807	0.949	288.817	27554	1.034	0.967	0.935	1.51794
331	IFT88_KAN487-5_3.tif:0009-0685	1.352	151.581	0	1019	132.51	70.065	0.836	204.962	19554	1.256	0.796	0.881	1.07722
332	IFT88_KAN487-5_3.tif:0010-0751	1.027	218.122	0	1200	53.503	76.964	0.885	224.06	21376	1.293	0.773	0.966	1.17759
333	IFT88_KAN487-5_3.tif:0011-0756	0.88	173.881	0	792	22.324	77.438	0.924	153.098	14606	1.191	0.84	0.903	0.804637
334	IFT88_KAN487-5_3.tif:0012-0853	1.122	208.953	0	1030	82.072	87.392	0.941	234.353	22358	1.061	0.942	0.926	1.23169
335	IFT88_KAN487-5_3.tif:0013-0908	1.059	106.248	0	406	15.911	92.96	0.888	112.481	10731	1.389	0.72	0.914	0.591166
336	IFT88_KAN487-5_3.tif:0014-0937	1.237	155.797	0	699	63.039	96.012	0.925	192.698	18384	1.382	0.723	0.922	1.01277
337	IFT88_KAN487-5_4.tif:0001-0133	1.184	120.894	0	736	95.895	13.639	0.896	143.193	13661	1.355	0.738	0.915	0.752578
338	IFT88_KAN487-5_4.tif:0002-0140	1.184	195.062	0	1166	32.172	14.327	0.981	231.041	22042	1.093	0.915	0.922	1.21428
339	IFT88_KAN487-5_4.tif:0003-0162	1.363	218.577	0	1423	60.065	16.612	0.875	297.842	28415	1.454	0.688	0.929	1.56537
340	IFT88_KAN487-5_4.tif:0004-0239	1.184	179.142	0	888	17.492	24.483	0.896	212.184	20243	1.33	0.752	0.93	1.11518
341	IFT88_KAN487-5_4.tif:0005-0366	0.964	120.717	0	724	68.794	37.513	0.945	116.412	11106	1.08	0.926	0.934	0.611824
342	IFT88_KAN487-5_4.tif:0006-0434	1.111	105.472	0	334	30.003	44.487	0.932	117.187	11180	1.338	0.747	0.93	0.615901
343	IFT88_KAN487-5_4.tif:0007-0606	0.912	285.391	0	1491	76.672	62.043	0.938	260.254	24829	1.032	0.969	0.941	1.36782
344	IFT88_KAN487-5_4.tif:0008-0634	1.195	144.254	0	642	138.758	64.936	0.893	172.374	16445	1.309	0.764	0.901	0.905947
345	IFT88_KAN487-5_4.tif:0009-0667	1.268	64.562	0	428	11.147	68.369	0.837	81.884	7812	1.461	0.685	0.89	0.430359
346	IFT88_KAN487-5_4.tif:0010-0781	1.153	235.673	0	1504	110.914	80	0.873	271.732	25924	1.448	0.691	0.917	1.42814
347	IFT88_KAN487-5_4.tif:0011-0813	1.205	165.296	0	1033	65.9	83.206	0.901	199.25	19009	1.41	0.709	0.916	1.0472
348	IFT88_KAN487-5_4.tif:0012-0851	0.765	193.973	0	754	46.766	87.141	0.888	148.423	14160	1.292	0.774	0.907	0.780068
349	IFT88_KAN487-5_5.tif:0001-0063	0.996	225.263	0	1020	65.601	6.455	0.932	224.312	21400	1.13	0.885	0.905	1.17892
350	IFT88_KAN487-5_5.tif:0002-0076	0.933	61.371	0	175	119.217	7.839	0.915	57.252	5462	1.169	0.855	0.932	0.300899
351	IFT88_KAN487-5_5.tif:0003-0256	1.09	197.942	0	849	34.442	26.214	0.974	215.78	20586	1.14	0.878	0.933	1.13407
352	IFT88_KAN487-5_5.tif:0004-0271	1.226	117.12	0	905	117.427	27.726	0.928	143.633	13703	1.409	0.71	0.944	0.754892
353	IFT88_KAN487-5_5.tif:0005-0346	1.122	145.15	0	626	96.849	35.462	0.901	162.794	15531	1.27	0.787	0.911	0.855595
354	IFT88_KAN487-5_5.tif:0006-0426	1.017	107.474	0	509	5.26	43.655	0.951	109.273	10425	1.075	0.93	0.915	0.574308
355	IFT88_KAN487-5_5.tif:0007-0483	1.153	109.945	0	629	62.264	49.509	0.899	126.768	12094	1.364	0.733	0.924	0.666253
356	IFT88_KAN487-5_5.tif:0008-0656	1.216	167.819	0	1221	42.98	67.175	0.894	204.05	19467	1.174	0.852	0.917	1.07243
357	IFT88_KAN487-5_5.tif:0009-0664	1.132	175.602	0	966	70.543	68.053	0.921	198.788	18965	1.145	0.873	0.919	1.04477
358	IFT88_KAN487-5_5.tif:0010-0775	1.132	156.278	0	550	130.552	79.378	0.95	176.913	16878	1.124	0.89	0.931	0.929801
359	IFT88_KAN487-5_5.tif:0011-0850	1.226	170.786	0	1029	117.879	87.03	0.956	209.449	19982	1.143	0.875	0.932	1.1008
360	IFT88_KAN487-5_5.tif:0012-0894	1.017	98.969	0	408	54.379	91.583	0.964	100.626	9600	1.336	0.748	0.96	0.528859
361	IFT88_KAN487-5_5.tif:0013-0912	1.153	114.009	0	529	25.344	93.361	0.938	131.453	12541	1.141	0.876	0.936	0.690878
362	IFT88_KAN487-5_5.tif:0014-0946	0.964	188.957	0	1119	11.377	96.866	0.914	182.217	17384	1.185	0.844	0.934	0.957676
363	IFT88_KAN487-5_6.tif:0001-0089	1.247	9.16	0	84	101.716	9.145	0.949	11.425	1090	1.084	0.923	0.902	0.0600476
364	IFT88_KAN487-5_6.tif:0002-0216	1.184	118.912	0	559	44.398	22.099	0.964	140.845	13437	1.197	0.836	0.942	0.740238
365	IFT88_KAN487-5_6.tif:0003-0248	1.08	169.748	0	1024	109.141	25.406	0.918	183.265	17484	1.228	0.814	0.936	0.963185
366	IFT88_KAN487-5_6.tif:0004-0312	1.027	150.867	0	763	30.148	31.993	0.901	154.974	14785	1.434	0.697	0.938	0.814498
367	IFT88_KAN487-5_6.tif:0005-0399	1.436	214.007	0	968	128.21	40.879	0.784	307.318	29319	1.697	0.589	0.873	1.61517
368	IFT88_KAN487-5_6.tif:0006-0420	1.163	238.937	0	1062	98.728	42.972	0.881	278	26522	1.289	0.776	0.921	1.46108
369	IFT88_KAN487-5_6.tif:0007-0431	0.975	172.925	0	1144	74.98	44.107	0.956	168.569	16082	1.154	0.867	0.939	0.88595
370	IFT88_KAN487-5_6.tif:0008-0475	0.891	135.647	0	356	36.911	48.673	0.983	120.856	11530	1.202	0.832	0.944	0.635182
371	IFT88_KAN487-5_6.tif:0009-0516	0.692	220.136	0	888	5.873	52.846	0.988	152.291	14529	1.06	0.944	0.923	0.800396
372	IFT88_KAN487-5_6.tif:0010-0557	0.964	239	0	1163	103.701	57.095	0.978	230.475	21988	1.065	0.939	0.934	1.21131
373	IFT88_KAN487-5_6.tif:0011-0580	1.017	125.299	0	684	55.57	59.329	0.938	127.397	12154	1.209	0.827	0.898	0.669558
374	IFT88_KAN487-5_6.tif:0012-0676	1.111	295.396	0	1142	96.249	69.228	0.932	328.208	31312	1.305	0.767	0.93	1.72496
375	IFT88_KAN487-5_6.tif:0013-0733	0.975	204.57	0	884	30.927	75.12	0.988	199.417	19025	1.17	0.855	0.939	1.04808
376	IFT88_KAN487-5_6.tif:0014-0748	1.08	274	0	1323	137.439	76.618	0.978	295.819	28222	1.032	0.969	0.945	1.55474
										17892.6				0.985693
377	IFT88_KAN487-6_1.tif:0001-0080	1.174	147.518	0	937	6.25	8.231	0.838	173.181	16522	1.437	0.696	0.9	0.910189
378	IFT88_KAN487-6_1.tif:0002-0130	0.975	329.763	0	1480	45.834	13.389	0.855	321.458	30668	1.432	0.698	0.912	1.68949
379	IFT88_KAN487-6_1.tif:0003-0131	0.901	216.233	0	921	130.852	13.395	0.927	194.921	18596	1.085	0.922	0.935	1.02444
380	IFT88_KAN487-6_1.tif:0004-0281	1.153	216.291	0	1076	96.069	28.797	0.858	249.384	23792	1.477	0.677	0.924	1.31069
381	IFT88_KAN487-6_1.tif:0005-0369	1.226	146.752	0	937	6.848	37.772	0.876	179.974	17170	1.369	0.73	0.936	0.945887
382	IFT88_KAN487-6_1.tif:0006-0451	1.143	150.651	0	1080	67.613	46.182	0.806	172.123	16421	1.641	0.609	0.879	0.904625
383	IFT88_KAN487-6_1.tif:0007-0459	1.069	162.441	0	740	31.216	46.989	0.955	173.674	16569	1.098	0.911	0.911	0.912778
384	IFT88_KAN487-6_1.tif:0008-0627	0.639	25.803	0	182	72.483	64.283	0.968	16.498	1574	1.185	0.844	0.946	0.0867109
385	IFT88_KAN487-6_1.tif:0009-0668	0.839	91.725	0	387	61.45	68.407	0.939	76.916	7338	1.136	0.88	0.952	0.404247
386	IFT88_KAN487-6_1.tif:0010-0816	1.111	329.387	0	1477	104.488	83.553	0.962	365.974	34915	1.361	0.735	0.942	1.92345
387	IFT88_KAN487-6_1.tif:0011-0874	1.069	205.216	0	1148	34.384	89.507	0.897	219.406	20932	1.369	0.73	0.915	1.15313
388	IFT88_KAN487-6_1.tif:0012-0972	1.226	157.846	0	1009	24.645	99.506	0.818	193.579	18468	1.525	0.656	0.903	1.01739
389	IFT88_KAN487-6_1.tif:0013-1008	0.996	116.316	0	299	90.754	103.21	0.914	115.825	11050	1.14	0.877	0.941	0.608739
390	IFT88_KAN487-6_2.tif:0001-0008	0.996	233.021	0	1288	53.758	0.833	0.857	232.037	22137	1.203	0.832	0.931	1.21952
391	IFT88_KAN487-6_2.tif:0002-0177	1.3	160.847	0	1031	24.26	18.164	0.812	209.061	19945	1.486	0.673	0.876	1.09876
392	IFT88_KAN487-6_2.tif:0003-0235	0.891	375.388	0	1631	98.822	24.053	0.935	334.455	31908	1.332	0.751	0.914	1.7578
393	IFT88_KAN487-6_2.tif:0004-0419	0.797	89.145	0	466	4.7	42.947	0.924	71.015	6775	1.39	0.719	0.944	0.373231
394	IFT88_KAN487-6_2.tif:0005-0480	1.446	270.058	0	1620	27.47	49.174	0.818	390.638	37268	1.5	0.667	0.896	2.05308
395	IFT88_KAN487-6_2.tif:0006-0506	0.786	419.067	0	1496	108.746	51.808	0.961	329.445	31430	1.262	0.793	0.974	1.73146
396	IFT88_KAN487-6_2.tif:0007-0588	1.09	160.673	0	716	19.145	60.194	0.887	175.152	16710	1.145	0.873	0.904	0.920546
397	IFT88_KAN487-6_2.tif:0008-0648	1.069	141.735	0	763	62.708	66.334	0.809	151.536	14457	1.684	0.594	0.879	0.796429
398	IFT88_KAN487-6_2.tif:0009-0855	1.122	121.131	0	574	75.812	87.564	0.958	135.855	12961	1.134	0.882	0.903	0.714015
399	IFT88_KAN487-6_2.tif:0010-0895	1.017	226.093	0	1210	103.686	91.644	0.921	229.878	21931	1.408	0.71	0.924	1.20817
400	IFT88_KAN487-6_2.tif:0011-0909	1.321	185.73	0	1263	122.383	93.031	0.871	245.296	23402	1.452	0.689	0.91	1.2892
401	IFT88_KAN487-6_3.tif:0001-0063	0.713	177.779	0	617	16.684	6.447	0.978	126.715	12089	1.318	0.759	0.932	0.665977
402	IFT88_KAN487-6_3.tif:0002-0069	1.363	140.308	0	1040	81.757	7.116	0.771	191.189	18240	1.765	0.567	0.864	1.00483
403	IFT88_KAN487-6_3.tif:0003-0418	0.922	184.705	0	809	87.781	42.795	0.935	170.372	16254	1.196	0.836	0.907	0.895425
404	IFT88_KAN487-6_3.tif:0004-0447	0.87	51.12	0	753	0.657	45.817	0.825	44.475	4243	1.598	0.626	0.922	0.233745
405	IFT88_KAN487-6_3.tif:0005-0531	0.755	48.653	0	211	42.144	54.418	0.958	36.718	3503	1.209	0.827	0.954	0.192979
406	IFT88_KAN487-6_3.tif:0006-0573	1.321	239.389	0	1964	132.305	58.68	0.848	316.164	30163	1.433	0.698	0.9	1.66167
407	IFT88_KAN487-6_3.tif:0007-0670	1.143	104.743	0	587	59.899	68.624	0.93	119.671	11417	1.312	0.762	0.936	0.628957
408	IFT88_KAN487-6_3.tif:0008-0764	0.933	72.989	0	320	129.544	78.23	0.927	68.09	6496	1.207	0.829	0.962	0.357861
409	IFT88_KAN487-6_3.tif:0009-0828	1.027	157.378	0	1047	26.036	84.731	0.901	161.662	15423	1.326	0.754	0.925	0.849646
410	IFT88_KAN487-6_3.tif:0010-0997	1.352	177.651	0	1184	24.789	102.146	0.773	240.213	22917	1.64	0.61	0.878	1.26249
411	IFT88_KAN487-6_4.tif:0001-0062	1.143	205.936	0	1103	127.567	6.375	0.85	235.286	22447	1.557	0.642	0.932	1.23659
412	IFT88_KAN487-6_4.tif:0002-0274	0.86	173.427	0	972	90.867	28.061	0.934	149.063	14221	1.169	0.856	0.891	0.783428
413	IFT88_KAN487-6_4.tif:0003-0307	1.027	106.898	0	641	39.335	31.452	0.901	109.808	10476	1.149	0.87	0.925	0.577118
414	IFT88_KAN487-6_4.tif:0004-0353	0.786	256.613	0	1081	124.77	36.125	0.899	201.734	19246	1.373	0.728	0.904	1.06025
415	IFT88_KAN487-6_4.tif:0005-0537	1.174	248.286	0	1595	111.588	55.044	0.955	291.48	27808	1.156	0.865	0.941	1.53193
416	IFT88_KAN487-6_4.tif:0006-0576	1.373	185.634	0	1276	91.711	58.959	0.906	254.898	24318	1.386	0.721	0.929	1.33967
417	IFT88_KAN487-6_4.tif:0007-0650	1.205	235.113	0	1425	53.45	66.586	0.912	283.409	27038	1.521	0.657	0.939	1.48951
418	IFT88_KAN487-6_4.tif:0008-0658	1.059	165.723	0	908	7.366	67.326	0.851	175.445	16738	1.437	0.696	0.886	0.922088
419	IFT88_KAN487-6_4.tif:0009-0749	1.027	214.031	0	1020	20.653	76.742	0.993	219.857	20975	1.011	0.989	0.92	1.1555
420	IFT88_KAN487-6_4.tif:0010-0816	0.933	152.865	0	759	83.953	83.594	0.946	142.606	13605	1.341	0.746	0.922	0.749493
421	IFT88_KAN487-6_4.tif:0011-0883	1.635	479.019	0	2413	109.861	90.454	0.949	783.278	74727	1.2	0.833	0.94	4.11667
422	IFT88_KAN487-6_4.tif:0012-1025	0.943	141.711	0	759	0.718	104.938	0.957	133.686	12754	1.352	0.74	0.942	0.702612
423	IFT88_KAN487-6_5.tif:0001-0042	0.985	282.819	0	1297	107.168	4.338	0.853	278.66	26585	1.164	0.859	0.891	1.46455
424	IFT88_KAN487-6_5.tif:0002-0102	0.818	83.744	0	626	37.65	10.431	0.935	68.468	6532	1.097	0.911	0.907	0.359845
425	IFT88_KAN487-6_5.tif:0003-0117	0.681	238.662	0	810	88.228	12.034	0.935	162.605	15513	1.283	0.779	0.922	0.854604
426	IFT88_KAN487-6_5.tif:0004-0193	1.069	170.314	0	831	59.395	19.813	0.87	182.091	17372	1.296	0.772	0.911	0.957015
427	IFT88_KAN487-6_5.tif:0005-0240	1.122	127.14	0	912	125.601	24.566	0.757	142.595	13604	1.902	0.526	0.907	0.749438
428	IFT88_KAN487-6_5.tif:0006-0339	1.059	175.475	0	904	125.368	34.769	0.765	185.77	17723	1.319	0.758	0.898	0.976351
429	IFT88_KAN487-6_5.tif:0007-0430	0.818	82.667	0	449	38.537	44.093	0.801	67.587	6448	1.272	0.786	0.862	0.355217
430	IFT88_KAN487-6_5.tif:0008-0536	1.467	247.179	0	1865	84.679	54.89	0.778	362.725	34605	1.964	0.509	0.921	1.90637
431	IFT88_KAN487-6_5.tif:0009-0553	1.048	80.28	0	373	132.607	56.669	0.937	84.148	8028	1.222	0.818	0.905	0.442259
432	IFT88_KAN487-6_5.tif:0010-0619	0.66	79.476	0	358	7.45	63.375	0.871	52.483	5007	1.427	0.701	0.9	0.275833
433	IFT88_KAN487-6_5.tif:0011-0743	1.279	204.23	0	1159	104.722	76.067	0.844	261.166	24916	1.398	0.715	0.881	1.37261
434	IFT88_KAN487-6_5.tif:0012-0885	0.922	241.443	0	929	107.87	90.647	0.949	222.708	21247	1.246	0.803	0.951	1.17049
435	IFT88_KAN487-6_5.tif:0013-0942	1.614	187.909	0	1711	88.833	96.447	0.731	303.324	28938	1.892	0.529	0.885	1.59418
436	IFT88_KAN487-6_6.tif:0001-0102	0.985	257.915	0	1491	54.488	10.447	0.892	254.122	24244	1.311	0.763	0.917	1.33559
437	IFT88_KAN487-6_6.tif:0002-0256	1.499	183.72	0	1374	55.627	26.264	0.787	275.379	26272	1.526	0.655	0.885	1.44731
438	IFT88_KAN487-6_6.tif:0003-0257	1.457	189.633	0	1344	114.576	26.341	0.877	276.291	26359	1.266	0.79	0.93	1.4521
439	IFT88_KAN487-6_6.tif:0004-0403	1.52	139.91	0	1022	22.49	41.302	0.782	212.645	20287	2.053	0.487	0.89	1.1176
440	IFT88_KAN487-6_6.tif:0005-0505	1.321	263.175	0	1813	77.511	51.699	0.775	347.578	33160	1.912	0.523	0.881	1.82677
441	IFT88_KAN487-6_6.tif:0006-0511	0.765	111.973	0	335	125.433	52.345	0.994	85.679	8174	1.224	0.817	0.918	0.450302
442	IFT88_KAN487-6_6.tif:0007-0645	1.027	44.357	0	428	15.366	66.088	0.974	45.565	4347	1.122	0.891	0.951	0.239474
443	IFT88_KAN487-6_6.tif:0008-0689	1.321	220.278	0	1577	137.342	70.527	0.921	290.924	27755	1.234	0.811	0.91	1.52901
444	IFT88_KAN487-6_6.tif:0009-0788	1.467	260.264	0	1635	81.004	80.656	0.797	381.928	36437	1.514	0.661	0.909	2.0073
445	IFT88_KAN487-6_6.tif:0010-0823	0.786	74.147	0	680	14.43	84.272	0.912	58.29	5561	1.169	0.856	0.932	0.306353
446	IFT88_KAN487-6_6.tif:0011-0870	1.174	165.527	0	918	34.183	89.071	0.943	194.323	18539	1.103	0.907	0.914	1.0213
447	IFT88_KAN487-6_6.tif:0012-0913	1.331	174.906	0	978	131.379	93.481	0.855	232.834	22213	1.323	0.756	0.904	1.2237
										19407.1				1.06913

## Sheet: RawData_Replicate2
	Label	Area	Mean	Min	Max	X	Y	Circ	IntDen	RawIntDen	AR	Round	Solidity
181	IFT88_KAN487-7_1.tif:0001-0038	0.87	17.735	0	91	51.293	3.91	0.913	15.429	1472	1.282	0.78	0.907	0.248873
182	IFT88_KAN487-7_1.tif:0002-0092	0.65	60.274	0	349	18.32	9.404	0.892	39.171	3737	1.298	0.77	0.879	0.631819
183	IFT88_KAN487-7_1.tif:0003-0143	1.08	96.282	0	628	128.346	14.671	0.794	103.949	9917	1.412	0.708	0.88	1.67668
184	IFT88_KAN487-7_1.tif:0004-0289	0.755	15.625	0	107	135.517	29.632	0.832	11.792	1125	1.393	0.718	0.862	0.190205
185	IFT88_KAN487-7_1.tif:0005-0545	1.426	76.456	0	622	129.891	55.805	0.823	108.99	10398	1.424	0.702	0.913	1.758
186	IFT88_KAN487-7_1.tif:0006-0566	1.048	24.95	0	202	18.874	57.982	0.88	26.152	2495	1.252	0.798	0.901	0.421832
187	IFT88_KAN487-7_1.tif:0007-0588	1.467	72.736	0	602	28.822	60.139	0.789	106.737	10183	1.468	0.681	0.867	1.72165
188	IFT88_KAN487-7_1.tif:0008-0691	0.702	28.224	0	101	64.022	70.827	0.892	19.821	1891	1.14	0.877	0.905	0.319713
189	IFT88_KAN487-7_1.tif:0009-0780	1.195	113.167	0	733	93.162	79.935	0.82	135.226	12901	1.428	0.7	0.88	2.18119
190	IFT88_KAN487-7_1.tif:0010-0864	0.922	9.08	0	96	56.056	88.592	0.794	8.375	799	1.204	0.83	0.893	0.135088
191	IFT88_KAN487-7_2.tif:0001-0284	0.776	6.027	0	54	76.05	29.096	0.826	4.675	446	1.304	0.767	0.881	0.0754057
192	IFT88_KAN487-7_2.tif:0002-0464	1.027	75.143	0	419	81.378	47.469	0.811	77.188	7364	1.312	0.762	0.875	1.24504
193	IFT88_KAN487-7_2.tif:0003-0491	0.755	91.25	0	340	17.024	50.33	0.832	68.866	6570	1.535	0.651	0.878	1.1108
194	IFT88_KAN487-7_2.tif:0004-0603	0.66	141.683	0	453	116.964	61.784	0.886	93.561	8926	1.184	0.845	0.94	1.50913
195	IFT88_KAN487-7_2.tif:0005-0755	0.985	84.66	0	346	58.605	77.326	0.864	83.415	7958	1.292	0.774	0.908	1.34547
196	IFT88_KAN487-7_2.tif:0006-0780	0.954	61.758	0	349	93.51	79.84	0.875	58.908	5620	1.258	0.795	0.929	0.950179
197	IFT88_KAN487-7_2.tif:0007-0783	1.279	65.131	0	271	122.104	80.145	0.857	83.289	7946	1.112	0.899	0.865	1.34344
198	IFT88_KAN487-7_2.tif:0008-0854	0.996	80.084	0	639	58.794	87.483	0.89	79.746	7608	1.237	0.808	0.884	1.28629
199	IFT88_KAN487-7_3.tif:0001-0050	0.87	47.795	0	290	126.694	5.104	0.94	41.582	3967	1.158	0.864	0.965	0.670705
200	IFT88_KAN487-7_3.tif:0002-0108	1.352	39.884	0	209	50.712	10.981	0.827	53.929	5145	1.096	0.913	0.866	0.869871
201	IFT88_KAN487-7_3.tif:0003-0108	0.629	77.9	0	326	81.337	11.088	0.817	48.992	4674	1.164	0.859	0.828	0.790238
202	IFT88_KAN487-7_3.tif:0004-0183	0.891	121.412	0	601	39.239	18.783	0.807	108.173	10320	1.646	0.607	0.859	1.74481
203	IFT88_KAN487-7_3.tif:0005-0209	0.943	24.289	0	111	18.706	21.499	0.895	22.913	2186	1.663	0.601	0.942	0.369589
204	IFT88_KAN487-7_3.tif:0006-0408	1.268	52.488	0	340	44.339	41.856	0.796	66.57	6351	1.815	0.551	0.846	1.07377
205	IFT88_KAN487-7_3.tif:0007-0408	1.059	75.782	0	411	120.986	41.672	0.778	80.228	7654	1.511	0.662	0.878	1.29407
206	IFT88_KAN487-7_3.tif:0008-0508	0.765	47.986	0	224	32.45	52.009	0.921	36.718	3503	1.219	0.82	0.924	0.592256
207	IFT88_KAN487-7_3.tif:0009-0545	0.744	16.507	0	79	74.954	55.857	0.91	12.285	1172	1.043	0.959	0.94	0.198151
208	IFT88_KAN487-7_3.tif:0010-0628	0.88	116.381	0	390	116.112	64.36	0.893	102.471	9776	1.411	0.709	0.898	1.65284
209	IFT88_KAN487-7_3.tif:0011-0841	0.891	63.612	0	392	30.148	86.115	0.833	56.675	5407	1.139	0.878	0.854	0.914167
210	IFT88_KAN487-7_3.tif:0012-0852	0.786	67.933	0	175	76.27	87.313	0.88	53.405	5095	1.459	0.685	0.932	0.861417
211	IFT88_KAN487-7_3.tif:0013-0859	1.111	73.774	0	416	104.53	88.013	0.831	81.968	7820	1.216	0.823	0.851	1.32214
212	IFT88_KAN487-7_3.tif:0014-1002	1.101	56.314	0	183	90.067	102.604	0.823	61.979	5913	1.491	0.671	0.868	0.999717
213	IFT88_KAN487-7_3.tif:0015-1030	1.027	56.122	0	205	26.74	105.491	0.836	57.65	5500	1.748	0.572	0.903	0.929891
214	IFT88_KAN487-7_4.tif:0001-0144	1.195	97.675	0	700	48.247	14.729	0.853	116.716	11135	1.24	0.806	0.912	1.88261
215	IFT88_KAN487-7_4.tif:0002-0334	1.006	47.646	0	334	71.465	34.221	0.785	47.944	4574	1.846	0.542	0.881	0.773331
216	IFT88_KAN487-7_4.tif:0003-0346	1.069	76.99	0	470	129.402	35.471	0.897	82.314	7853	1.295	0.772	0.911	1.32772
217	IFT88_KAN487-7_4.tif:0004-0602	0.818	47.641	0	255	69.106	61.699	0.949	38.951	3716	1.076	0.93	0.94	0.628268
218	IFT88_KAN487-7_4.tif:0005-0681	0.797	44.395	0	230	27.694	69.74	0.848	35.366	3374	1.36	0.735	0.884	0.570446
219	IFT88_KAN487-7_4.tif:0006-0706	1.048	144.67	0	825	131.111	72.273	0.827	151.641	14467	1.511	0.662	0.897	2.44595
220	IFT88_KAN487-7_4.tif:0007-0884	0.807	58.87	0	286	44.524	90.576	0.83	47.514	4533	1.617	0.619	0.917	0.766399
221	IFT88_KAN487-7_5.tif:0001-0197	0.88	112.56	0	479	22.766	20.195	0.906	99.106	9455	1.269	0.788	0.944	1.59857
222	IFT88_KAN487-7_5.tif:0002-0346	1.247	147.168	0	826	131.622	35.496	0.771	183.569	17513	1.409	0.71	0.841	2.96094
223	IFT88_KAN487-7_5.tif:0003-0372	0.807	70.701	0	356	11.659	38.035	0.89	57.063	5444	1.052	0.951	0.895	0.920423
224	IFT88_KAN487-7_5.tif:0004-0673	0.818	39.769	0	128	26.25	68.951	1	32.515	3102	1.214	0.824	0.923	0.524458
225	IFT88_KAN487-7_5.tif:0005-0742	0.755	33.208	0	223	0.774	75.978	0.804	25.062	2391	1.648	0.607	0.867	0.404249
226	IFT88_KAN487-7_5.tif:0006-0742	0.65	54.758	0	231	2.669	75.942	0.825	35.586	3395	1.648	0.607	0.905	0.573996
227	IFT88_KAN487-7_5.tif:0007-0755	0.786	84.96	0	490	49.325	77.274	0.967	66.79	6372	1.244	0.804	0.909	1.07732
228	IFT88_KAN487-7_5.tif:0008-0797	1.268	59.686	0	346	105.659	81.515	0.682	75.7	7222	2.054	0.487	0.84	1.22103
229	IFT88_KAN487-7_6.tif:0001-0047	1.226	25.291	0	242	112.206	4.823	0.712	31.016	2959	1.674	0.597	0.824	0.500281
230	IFT88_KAN487-7_6.tif:0002-0077	0.922	30.943	0	248	80.388	7.952	0.935	28.542	2723	1.161	0.861	0.912	0.460381
231	IFT88_KAN487-7_6.tif:0003-0114	1.184	26.982	0	205	58.156	11.756	0.781	31.959	3049	1.653	0.605	0.866	0.515498
232	IFT88_KAN487-7_6.tif:0004-0487	1.111	56.368	0	367	121.455	49.855	0.888	62.629	5975	1.048	0.954	0.951	1.0102
233	IFT88_KAN487-7_6.tif:0005-0522	0.86	69.744	0	419	33.821	53.593	0.754	59.946	5719	1.489	0.671	0.841	0.966917
234	IFT88_KAN487-7_6.tif:0006-0830	0.954	85.451	0	414	92.911	84.879	0.753	81.507	7776	1.36	0.735	0.843	1.3147
235	IFT88_KAN487-7_6.tif:0007-0963	0.943	8.011	0	56	22.83	98.62	0.907	7.557	721	1.075	0.93	0.952	0.1219
										5914.67				1
236	IFT88_KAN487-8_1.tif:0001-0188	0.922	30.114	0	237	94.799	19.252	0.824	27.777	2650	1.25	0.8	0.842	0.448038
237	IFT88_KAN487-8_1.tif:0002-0303	0.681	94.431	0	345	132.392	31.109	0.763	64.338	6138	1.97	0.508	0.903	1.03776
238	IFT88_KAN487-8_1.tif:0003-0487	1.048	56	0	407	94.816	49.863	0.784	58.698	5600	1.809	0.553	0.873	0.946798
239	IFT88_KAN487-8_1.tif:0004-0568	1.111	2.208	0	13	48.16	58.222	0.866	2.453	234	1.732	0.577	0.91	0.0395626
240	IFT88_KAN487-8_1.tif:0005-0632	0.776	105.797	0	418	107.741	64.795	0.92	82.062	7829	1.49	0.671	0.892	1.32366
241	IFT88_KAN487-8_1.tif:0006-0699	0.629	139.633	2	497	69.03	71.667	0.799	87.817	8378	1.903	0.525	0.909	1.41648
242	IFT88_KAN487-8_1.tif:0007-0744	1.3	90.137	0	464	136.599	76.218	0.882	117.156	11177	1.143	0.875	0.899	1.88971
243	IFT88_KAN487-8_1.tif:0008-0894	1.3	40.839	0	366	101.436	91.674	0.675	53.08	5064	1.667	0.6	0.816	0.856176
244	IFT88_KAN487-8_1.tif:0009-1024	0.975	44.624	0	231	96.768	104.857	0.912	43.5	4150	1.306	0.766	0.903	0.701645
245	IFT88_KAN487-8_2.tif:0001-0015	0.901	112.64	0	540	107.171	1.536	0.946	101.538	9687	1.08	0.926	0.901	1.63779
246	IFT88_KAN487-8_2.tif:0002-0043	0.66	27.603	0	141	86.323	4.406	0.906	18.228	1739	1.414	0.707	0.9	0.294015
247	IFT88_KAN487-8_2.tif:0003-0213	0.629	20.7	0	83	9.407	21.799	0.936	13.018	1242	1.262	0.792	0.889	0.209986
248	IFT88_KAN487-8_2.tif:0004-0250	0.933	30.551	0	134	51.468	25.625	0.915	28.5	2719	1.336	0.748	0.932	0.459704
249	IFT88_KAN487-8_2.tif:0005-0294	0.901	34.651	0	115	139.45	30.115	0.843	31.236	2980	1.481	0.675	0.887	0.503832
250	IFT88_KAN487-8_2.tif:0006-0475	0.639	33.557	0	249	14.935	48.654	0.877	21.456	2047	1.435	0.697	0.884	0.346088
251	IFT88_KAN487-8_2.tif:0007-0635	1.027	45.061	0	265	119.783	65.179	0.693	46.288	4416	1.764	0.567	0.852	0.746618
252	IFT88_KAN487-8_2.tif:0008-0753	0.922	86.511	0	410	71.729	77.132	0.949	79.798	7613	1.246	0.803	0.951	1.28714
253	IFT88_KAN487-8_2.tif:0009-0813	0.839	27	0	115	46.251	83.232	0.925	22.641	2160	1.138	0.878	0.909	0.365193
254	IFT88_KAN487-8_2.tif:0010-0976	1.174	63.616	0	387	95.721	99.991	0.829	74.683	7125	1.623	0.616	0.9	1.20463
255	IFT88_KAN487-8_3.tif:0001-0114	0.66	186.905	0	631	123.713	11.714	0.871	123.424	11775	1.386	0.722	0.894	1.99081
256	IFT88_KAN487-8_3.tif:0002-0172	0.922	92.023	0	404	70.563	17.615	0.892	84.882	8098	1.209	0.827	0.876	1.36914
257	IFT88_KAN487-8_3.tif:0003-0225	0.996	30.168	0	159	28.383	23.076	0.862	30.041	2866	1.53	0.654	0.896	0.484558
258	IFT88_KAN487-8_3.tif:0004-0266	1.101	94.552	0	400	47.863	27.162	0.873	104.064	9928	1.189	0.841	0.875	1.67854
259	IFT88_KAN487-8_3.tif:0005-0357	0.933	23.584	0	137	8.075	36.638	0.946	22.001	2099	1.333	0.75	0.932	0.35488
260	IFT88_KAN487-8_3.tif:0006-0518	0.954	48.407	0	247	68.093	53.098	0.922	46.173	4405	1.09	0.918	0.892	0.744758
261	IFT88_KAN487-8_3.tif:0007-0527	0.912	50.885	0	266	33.324	54.004	0.826	46.403	4427	1.468	0.681	0.874	0.748478
262	IFT88_KAN487-8_3.tif:0008-0578	0.66	51.762	0	225	2.201	59.231	0.906	34.181	3261	1.025	0.976	0.881	0.551341
263	IFT88_KAN487-8_3.tif:0009-0629	1.006	57.708	0	231	82.659	64.454	0.883	58.069	5540	1.211	0.826	0.923	0.936654
264	IFT88_KAN487-8_3.tif:0010-0671	1.143	43.734	0	142	114.445	68.672	0.775	49.967	4767	1.187	0.842	0.823	0.805962
265	IFT88_KAN487-8_3.tif:0011-0697	1.122	54.318	0	291	48.304	71.322	0.864	60.921	5812	1.381	0.724	0.881	0.982641
266	IFT88_KAN487-8_3.tif:0012-0704	0.723	24.072	0	136	2.667	72.141	0.976	17.41	1661	1.088	0.919	0.902	0.280827
267	IFT88_KAN487-8_3.tif:0013-0814	0.985	51.372	0	334	78.5	83.39	0.746	50.617	4829	1.834	0.545	0.843	0.816444
268	IFT88_KAN487-8_3.tif:0014-0921	1.184	78.327	0	492	93.951	94.369	0.935	92.775	8851	1.258	0.795	0.946	1.49645
269	IFT88_KAN487-8_4.tif:0001-0194	0.86	76.512	0	386	57.203	19.941	0.872	65.763	6274	1.258	0.795	0.901	1.06075
270	IFT88_KAN487-8_4.tif:0002-0272	0.807	136.909	0	601	25.641	27.851	0.872	110.5	10542	1.229	0.814	0.922	1.78235
271	IFT88_KAN487-8_4.tif:0003-0277	0.818	54.551	0	261	98.116	28.408	0.889	44.6	4255	1.363	0.734	0.872	0.719397
272	IFT88_KAN487-8_4.tif:0004-0391	0.65	29.016	0	89	8.783	40.061	0.944	18.857	1799	1.148	0.871	0.932	0.304159
273	IFT88_KAN487-8_4.tif:0005-0690	0.88	30.405	0	259	60.608	70.688	0.835	26.771	2554	1.428	0.7	0.884	0.431807
274	IFT88_KAN487-8_4.tif:0006-0719	0.765	55.123	0	263	83.601	73.638	0.921	42.179	4024	1.321	0.757	0.918	0.680342
275	IFT88_KAN487-8_4.tif:0007-0776	1.069	91.931	0	305	127.799	79.426	0.764	98.288	9377	1.625	0.615	0.857	1.58538
276	IFT88_KAN487-8_4.tif:0008-0881	0.702	25.119	0	130	24.262	90.212	0.964	17.641	1683	1.288	0.776	0.924	0.284547
277	IFT88_KAN487-8_4.tif:0009-0920	1.101	15.781	0	147	14.017	94.185	0.869	17.368	1657	1.327	0.754	0.917	0.280151
278	IFT88_KAN487-8_4.tif:0010-0940	0.734	67.286	0	244	56.558	96.282	0.917	49.37	4710	1.42	0.704	0.903	0.796325
279	IFT88_KAN487-8_5.tif:0001-0008	0.66	15.825	0	165	74.676	0.828	0.858	10.45	997	1.401	0.714	0.863	0.168564
280	IFT88_KAN487-8_5.tif:0002-0125	1.08	44.068	0	256	108.182	12.78	0.803	47.577	4539	1.749	0.572	0.912	0.767414
281	IFT88_KAN487-8_5.tif:0003-0148	0.818	34.615	0	260	3.89	15.184	0.87	28.301	2700	1.087	0.92	0.897	0.456492
282	IFT88_KAN487-8_5.tif:0004-0152	0.954	86.736	0	473	65.941	15.575	0.88	82.733	7893	1.428	0.7	0.875	1.33448
283	IFT88_KAN487-8_5.tif:0005-0478	0.713	41.897	0	159	50.088	48.952	0.891	29.863	2849	1.295	0.772	0.895	0.481683
284	IFT88_KAN487-8_5.tif:0006-0479	0.922	28.295	0	204	93.722	49.071	0.835	26.1	2490	1.459	0.685	0.889	0.420987
285	IFT88_KAN487-8_5.tif:0007-0658	0.744	60.563	0	259	50.493	67.373	0.966	45.072	4300	1.239	0.807	0.91	0.727006
286	IFT88_KAN487-8_5.tif:0008-0766	0.964	75.272	0	363	108.673	78.453	0.809	72.587	6925	1.55	0.645	0.876	1.17082
287	IFT88_KAN487-8_5.tif:0009-0815	0.954	89.088	0	529	85.002	83.512	0.935	84.976	8107	1.19	0.84	0.943	1.37066
288	IFT88_KAN487-8_5.tif:0010-0823	0.954	75.89	0	370	19.237	84.28	0.848	72.388	6906	1.349	0.741	0.919	1.1676
289	IFT88_KAN487-8_5.tif:0011-0890	0.86	15.841	0	154	128.986	91.16	0.831	13.616	1299	1.201	0.832	0.845	0.219623
290	IFT88_KAN487-8_6.tif:0001-0261	1.027	28.949	0	165	120.123	26.665	0.746	29.737	2837	1.338	0.747	0.82	0.479655
291	IFT88_KAN487-8_6.tif:0002-0417	0.807	93.351	0	356	70.322	42.737	0.89	75.344	7188	1.155	0.866	0.901	1.21528
292	IFT88_KAN487-8_6.tif:0003-0591	0.88	39.357	0	147	100.088	60.586	0.971	34.653	3306	1.223	0.818	0.939	0.558949
293	IFT88_KAN487-8_6.tif:0004-0659	1.08	46.291	0	208	59.02	67.477	0.831	49.978	4768	1.12	0.893	0.866	0.806131
294	IFT88_KAN487-8_6.tif:0005-0841	0.66	20.27	0	78	105.213	86.095	0.825	13.385	1277	1.665	0.601	0.869	0.215904
295	IFT88_KAN487-8_6.tif:0006-0892	0.943	44.222	0	273	34.62	91.318	0.882	41.718	3980	1.124	0.89	0.891	0.672903
										4841.72				0.818594
296	IFT88_KAN487-9_1.tif:0001-0268	0.943	65.122	0	244	79.634	27.445	0.943	61.434	5861	1.25	0.8	0.914	0.990925
297	IFT88_KAN487-9_1.tif:0002-0478	0.765	53.644	0	264	36.949	49.01	0.907	41.047	3916	1.215	0.823	0.901	0.662082
298	IFT88_KAN487-9_1.tif:0003-0559	1.216	75.638	0	502	121.347	57.227	0.873	91.968	8774	1.27	0.787	0.875	1.48343
299	IFT88_KAN487-9_1.tif:0004-0650	0.933	17.27	0	129	27.358	66.611	0.818	16.111	1537	1.589	0.629	0.886	0.259862
300	IFT88_KAN487-9_1.tif:0005-0703	0.86	38.305	0	203	59.304	71.954	0.948	32.924	3141	1.078	0.927	0.927	0.531052
301	IFT88_KAN487-9_1.tif:0006-0744	1.31	47.296	0	303	102.343	76.194	0.697	61.969	5912	1.478	0.677	0.825	0.999548
302	IFT88_KAN487-9_1.tif:0007-0755	1.279	48.238	0	363	79.201	77.35	0.705	61.686	5885	2.014	0.496	0.865	0.994983
303	IFT88_KAN487-9_1.tif:0008-0959	0.828	25.557	0	93	7.889	98.209	0.9	21.163	2019	1.365	0.733	0.878	0.341354
304	IFT88_KAN487-9_2.tif:0001-0067	0.88	40.119	0	249	114.843	6.869	0.971	35.324	3370	1.284	0.779	0.949	0.569769
305	IFT88_KAN487-9_2.tif:0002-0266	0.671	7.516	0	51	79.172	27.259	0.778	5.042	481	1.674	0.597	0.865	0.0813232
306	IFT88_KAN487-9_2.tif:0003-0428	0.839	90.588	0	446	48.819	43.824	0.959	75.962	7247	1.349	0.741	0.93	1.22526
307	IFT88_KAN487-9_2.tif:0004-0560	0.755	35.528	0	213	14.316	57.414	0.958	26.813	2558	1.111	0.9	0.96	0.432484
308	IFT88_KAN487-9_2.tif:0005-0571	0.985	40.191	0	126	122.545	58.45	0.853	39.6	3778	1.396	0.716	0.887	0.63875
309	IFT88_KAN487-9_2.tif:0006-0576	1.048	84.06	0	529	85.396	58.978	0.74	88.111	8406	1.221	0.819	0.833	1.42121
310	IFT88_KAN487-9_2.tif:0007-0605	0.839	11.387	0	33	26.044	61.979	0.726	9.549	911	1.727	0.579	0.808	0.154024
311	IFT88_KAN487-9_2.tif:0008-0699	1.153	65.409	0	523	46.137	71.508	0.873	75.417	7195	1.39	0.72	0.921	1.21647
312	IFT88_KAN487-9_2.tif:0009-0862	1.101	52.324	0	352	81.344	88.275	0.843	57.587	5494	1.134	0.882	0.913	0.928876
313	IFT88_KAN487-9_2.tif:0010-0926	1.101	78.162	0	404	112.035	94.836	0.912	86.025	8207	1.015	0.985	0.894	1.38757
314	IFT88_KAN487-9_3.tif:0001-0245	1.226	91.812	0	562	122.795	25.079	0.755	112.596	10742	1.856	0.539	0.9	1.81616
315	IFT88_KAN487-9_3.tif:0002-0265	0.681	41.277	0	142	72.31	27.222	0.791	28.123	2683	1.826	0.547	0.909	0.453618
316	IFT88_KAN487-9_3.tif:0003-0284	1.038	35.091	0	161	45.914	29.13	0.94	36.414	3474	1.274	0.785	0.934	0.587353
317	IFT88_KAN487-9_3.tif:0004-0350	1.132	76.389	0	490	22.194	35.865	0.799	86.475	8250	1.756	0.569	0.885	1.39484
318	IFT88_KAN487-9_3.tif:0005-0455	0.922	96.273	0	396	100.433	46.642	0.875	88.802	8472	1.38	0.724	0.921	1.43237
319	IFT88_KAN487-9_3.tif:0006-0471	0.776	34.797	0	224	120.991	48.202	0.969	26.991	2575	1.154	0.866	0.931	0.435358
320	IFT88_KAN487-9_3.tif:0007-0637	0.985	70.468	0	427	81.944	65.275	0.864	69.432	6624	1.174	0.852	0.891	1.11993
321	IFT88_KAN487-9_3.tif:0008-0856	1.289	87.301	0	569	110.593	87.8	0.737	112.554	10738	1.335	0.749	0.86	1.81549
322	IFT88_KAN487-9_3.tif:0009-0918	1.321	77.778	0	478	71.581	93.969	0.906	102.722	9800	1.186	0.843	0.92	1.6569
323	IFT88_KAN487-9_3.tif:0010-1031	1.195	79.719	0	423	117.16	105.667	0.904	95.259	9088	1.201	0.833	0.912	1.53652
324	IFT88_KAN487-9_4.tif:0001-0042	1.059	21.743	0	158	100.83	4.309	0.815	23.018	2196	1.276	0.784	0.852	0.37128
325	IFT88_KAN487-9_4.tif:0002-0071	0.786	23.933	0	263	49.418	7.293	0.926	18.815	1795	1.102	0.908	0.968	0.303483
326	IFT88_KAN487-9_4.tif:0003-0301	0.87	66.819	0	286	103.515	30.794	0.959	58.132	5546	1.245	0.803	0.927	0.937668
327	IFT88_KAN487-9_4.tif:0004-0345	0.629	11.417	0	62	72.068	35.337	0.914	7.18	685	1.171	0.854	0.916	0.115814
328	IFT88_KAN487-9_4.tif:0005-0445	0.901	116.942	0	554	17.992	45.548	0.914	105.416	10057	1.339	0.747	0.915	1.70035
329	IFT88_KAN487-9_4.tif:0006-0585	1.321	49.937	0	338	79.26	60.06	0.758	65.952	6292	1.225	0.816	0.818	1.0638
330	IFT88_KAN487-9_4.tif:0007-0610	0.87	20	0	263	130.251	62.43	0.913	17.4	1660	1.234	0.81	0.892	0.280658
331	IFT88_KAN487-9_4.tif:0008-0682	1.405	62.254	0	352	96.756	69.75	0.783	87.44	8342	1.666	0.6	0.921	1.41039
332	IFT88_KAN487-9_4.tif:0009-0935	1.646	21.446	0	155	131.317	95.654	0.688	35.292	3367	1.653	0.605	0.86	0.569262
333	IFT88_KAN487-9_4.tif:0010-1014	1.038	30.394	0	240	81.804	103.898	0.677	31.54	3009	2.059	0.486	0.811	0.508735
334	IFT88_KAN487-9_5.tif:0001-0109	1.038	66.556	0	372	53.678	11.208	0.772	69.065	6589	1.908	0.524	0.921	1.11401
335	IFT88_KAN487-9_5.tif:0002-0193	0.839	8.3	0	75	136.968	19.758	0.862	6.96	664	1.209	0.827	0.904	0.112263
336	IFT88_KAN487-9_5.tif:0003-0234	1.08	56.757	0	299	112.892	23.904	0.935	61.277	5846	1.153	0.867	0.916	0.988389
337	IFT88_KAN487-9_5.tif:0004-0332	0.629	2.817	0	13	128.196	34.06	0.898	1.771	169	1.68	0.595	0.909	0.028573
338	IFT88_KAN487-9_5.tif:0005-0338	0.66	105.222	0	383	52.714	34.596	0.983	69.484	6629	1.335	0.749	0.913	1.12077
339	IFT88_KAN487-9_5.tif:0006-0437	1.352	88.101	0	484	21.827	44.6	0.753	119.126	11365	1.287	0.777	0.881	1.92149
340	IFT88_KAN487-9_5.tif:0007-0617	1.153	116.145	0	587	128.398	63.109	0.862	133.916	12776	1.122	0.892	0.887	2.16005
341	IFT88_KAN487-9_5.tif:0008-0798	1.174	88.036	0	488	89.104	81.723	0.815	103.351	9860	1.263	0.792	0.885	1.66704
342	IFT88_KAN487-9_5.tif:0009-0829	1.195	25.737	0	240	138.098	84.971	0.693	30.754	2934	1.268	0.789	0.794	0.496054
343	IFT88_KAN487-9_5.tif:0010-0876	1.08	15.524	0	121	121.422	89.772	0.965	16.76	1599	1.201	0.833	0.924	0.270345
344	IFT88_KAN487-9_5.tif:0011-1008	0.818	29.705	0	179	4.563	103.323	0.74	24.286	2317	1.623	0.616	0.821	0.391738
345	IFT88_KAN487-9_6.tif:0001-0082	0.912	7.195	0	57	108.375	8.433	0.826	6.562	626	1.57	0.637	0.879	0.105838
346	IFT88_KAN487-9_6.tif:0002-0109	1.059	38.446	0	334	72.161	11.154	0.747	40.701	3883	1.642	0.609	0.835	0.656503
347	IFT88_KAN487-9_6.tif:0003-0125	1.551	108.601	0	570	26.608	12.928	0.651	168.475	16073	2.006	0.498	0.794	2.71748
348	IFT88_KAN487-9_6.tif:0004-0153	1.027	57.469	0	429	51.699	15.713	0.889	59.034	5632	1.44	0.695	0.899	0.952208
349	IFT88_KAN487-9_6.tif:0005-0251	1.446	76.442	0	491	119.124	25.853	0.786	110.573	10549	1.41	0.709	0.911	1.78353
350	IFT88_KAN487-9_6.tif:0006-0288	0.975	12.065	0	44	92.851	29.482	0.855	11.761	1122	1.369	0.73	0.882	0.189698
351	IFT88_KAN487-9_6.tif:0007-0434	1.153	61.536	0	317	71.02	44.353	0.8	70.952	6769	1.396	0.716	0.909	1.14444
352	IFT88_KAN487-9_6.tif:0008-0474	0.839	30.9	0	166	2.991	48.512	0.959	25.911	2472	1.234	0.811	0.925	0.417944
353	IFT88_KAN487-9_6.tif:0009-0509	1.405	71.306	0	552	106.919	52.083	0.702	100.154	9555	2.008	0.498	0.873	1.61547
354	IFT88_KAN487-9_6.tif:0010-0797	0.681	25	0	272	86.286	81.6	0.899	17.033	1625	1.08	0.926	0.909	0.27474
355	IFT88_KAN487-9_6.tif:0011-0871	0.912	18.529	0	146	119.285	89.22	0.865	16.897	1612	1.436	0.696	0.906	0.272543
356	IFT88_KAN487-9_6.tif:0012-0966	1.069	114.882	0	474	12.846	98.97	0.881	122.826	11718	1.522	0.657	0.944	1.98117
										5450.34				0.921495
1	IFT88_KAN487-10_1.tif:0001-0111	1.111	81.17	0	451	134.176	11.4	0.866	90.186	8604	1.377	0.726	0.887	1.45469
2	IFT88_KAN487-10_1.tif:0002-0162	0.86	69	0	385	69.153	16.542	0.872	59.306	5658	1.33	0.752	0.891	0.956604
3	IFT88_KAN487-10_1.tif:0003-0324	0.975	56.634	0	312	75.314	33.133	0.883	55.208	5267	1.251	0.8	0.899	0.890497
4	IFT88_KAN487-10_1.tif:0004-0509	1.122	32.065	0	191	7.902	52.109	0.801	35.963	3431	1.65	0.606	0.895	0.580083
5	IFT88_KAN487-10_1.tif:0005-0589	1.101	71.867	0	331	100.406	60.331	0.971	79.096	7546	1.188	0.842	0.913	1.27581
6	IFT88_KAN487-10_1.tif:0006-0633	0.797	80.566	0	242	114.067	64.838	0.924	64.18	6123	1.308	0.764	0.927	1.03522
7	IFT88_KAN487-10_1.tif:0007-0733	1.53	61.5	0	535	44.088	75.065	0.693	94.117	8979	1.501	0.666	0.807	1.51809
8	IFT88_KAN487-10_1.tif:0008-0829	1.205	105.122	0	713	133.501	84.888	0.999	126.715	12089	1.221	0.819	0.939	2.0439
9	IFT88_KAN487-10_2.tif:0001-0055	1.09	58.096	0	309	119.444	5.612	0.727	63.331	6042	1.227	0.815	0.825	1.02153
10	IFT88_KAN487-10_2.tif:0002-0111	1.153	50.855	0	205	98.302	11.507	0.709	58.636	5594	1.421	0.704	0.846	0.945784
11	IFT88_KAN487-10_2.tif:0003-0153	0.818	78.718	0	321	18.891	15.68	0.984	64.359	6140	1.167	0.857	0.945	1.0381
12	IFT88_KAN487-10_2.tif:0004-0209	1.237	26.856	0	273	36.324	21.471	0.936	33.217	3169	1.221	0.819	0.929	0.535786
13	IFT88_KAN487-10_2.tif:0005-0430	1.122	59.009	0	378	120.718	44.057	0.971	66.182	6314	1.203	0.831	0.934	1.06751
14	IFT88_KAN487-10_2.tif:0006-0456	1.488	59.93	0	587	78.315	46.671	0.674	89.201	8510	1.932	0.518	0.814	1.43879
15	IFT88_KAN487-10_2.tif:0007-0667	1.205	71.574	0	532	27.128	68.352	0.774	86.276	8231	1.257	0.795	0.852	1.39162
16	IFT88_KAN487-10_2.tif:0008-0710	1.101	68.752	0	383	115.452	72.754	0.924	75.669	7219	1.027	0.974	0.913	1.22052
17	IFT88_KAN487-10_2.tif:0009-0723	0.744	64.423	0	170	60.121	74.112	1	47.944	4574	1.209	0.827	0.928	0.773331
18	IFT88_KAN487-10_2.tif:0010-0861	1.027	78.98	0	380	90.729	88.136	0.705	81.13	7740	1.283	0.779	0.807	1.30861
19	IFT88_KAN487-10_2.tif:0011-0990	1.08	75.155	0	372	57.292	101.43	0.947	81.14	7741	1.208	0.828	0.949	1.30878
20	IFT88_KAN487-10_3.tif:0001-0043	1.163	24.919	0	238	76.65	4.472	0.739	28.993	2766	1.553	0.644	0.851	0.467651
21	IFT88_KAN487-10_3.tif:0002-0121	1.08	77.699	0	449	41.144	12.395	0.947	83.886	8003	1.221	0.819	0.936	1.35308
22	IFT88_KAN487-10_3.tif:0003-0268	0.964	25.88	0	264	63.192	27.45	0.862	24.957	2381	1.3	0.77	0.864	0.402558
23	IFT88_KAN487-10_3.tif:0004-0294	1.048	72.78	0	474	122.521	30.123	0.907	76.287	7278	1.315	0.761	0.905	1.2305
24	IFT88_KAN487-10_3.tif:0005-0304	1.111	36.255	0	304	91.81	31.203	0.831	40.282	3843	1.368	0.731	0.88	0.64974
25	IFT88_KAN487-10_3.tif:0006-0413	1.174	87.116	0	459	115.924	42.323	0.904	102.271	9757	1.098	0.911	0.903	1.64963
26	IFT88_KAN487-10_3.tif:0007-0562	0.891	32.459	0	236	53.702	57.557	0.903	28.919	2759	1.173	0.852	0.899	0.466467
27	IFT88_KAN487-10_3.tif:0008-0680	1.111	32.104	0	160	91.614	69.606	0.877	35.67	3403	1.489	0.671	0.93	0.575349
28	IFT88_KAN487-10_3.tif:0009-0693	0.975	60.258	0	349	48.253	70.948	0.956	58.74	5604	1.186	0.843	0.93	0.947474
29	IFT88_KAN487-10_3.tif:0010-0706	1.321	36.611	0	238	68.481	72.347	0.693	48.353	4613	1.45	0.69	0.818	0.779925
30	IFT88_KAN487-10_3.tif:0011-0715	1.331	28.827	0	180	30.354	73.254	0.823	38.374	3661	1.567	0.638	0.888	0.618969
31	IFT88_KAN487-10_3.tif:0012-0733	1.184	49.823	0	422	5.86	75.014	0.781	59.013	5630	1.715	0.583	0.859	0.95187
32	IFT88_KAN487-10_3.tif:0013-0840	0.807	45.416	0	294	138.93	85.965	0.993	36.655	3497	1.019	0.981	0.901	0.591242
33	IFT88_KAN487-10_3.tif:0014-0952	0.786	19.16	0	65	16.565	97.448	0.837	15.062	1437	1.406	0.711	0.867	0.242955
34	IFT88_KAN487-10_3.tif:0015-1021	0.996	60.295	0	336	130.222	104.491	0.873	60.04	5728	1.31	0.763	0.909	0.968439
35	IFT88_KAN487-10_4.tif:0001-0082	1.226	28.496	0	151	17.984	8.447	0.787	34.947	3334	1.416	0.706	0.88	0.563683
36	IFT88_KAN487-10_4.tif:0002-0208	1.279	59.984	0	213	41.567	21.241	0.761	76.706	7318	1.272	0.786	0.856	1.23726
37	IFT88_KAN487-10_4.tif:0003-0212	1.111	59.906	0	326	141.075	21.775	0.932	66.56	6350	1.125	0.889	0.914	1.0736
38	IFT88_KAN487-10_4.tif:0004-0294	1.069	51.471	0	229	13.425	30.177	0.844	55.03	5250	1.611	0.621	0.911	0.887623
39	IFT88_KAN487-10_4.tif:0005-0306	1.017	10.691	0	109	71.163	31.366	0.793	10.87	1037	1.618	0.618	0.858	0.175327
40	IFT88_KAN487-10_4.tif:0006-0313	1.08	57.718	0	242	89.183	32.085	0.72	62.315	5945	1.222	0.818	0.827	1.00513
41	IFT88_KAN487-10_4.tif:0007-0398	1.048	78.41	0	304	117.993	40.76	0.891	82.188	7841	1.433	0.698	0.943	1.32569
42	IFT88_KAN487-10_4.tif:0008-0609	1.048	40.44	0	202	20.306	62.349	0.891	42.389	4044	1.506	0.664	0.943	0.683723
43	IFT88_KAN487-10_4.tif:0009-0701	1.069	73.118	0	382	17.146	71.818	0.914	78.174	7458	1.289	0.776	0.891	1.26093
44	IFT88_KAN487-10_4.tif:0010-0712	1.646	50.07	0	262	70.05	72.948	0.77	82.398	7861	1.392	0.718	0.867	1.32907
45	IFT88_KAN487-10_4.tif:0011-0749	1.027	60.622	0	291	64.773	76.725	0.889	62.273	5941	1.167	0.857	0.899	1.00445
46	IFT88_KAN487-10_5.tif:0001-0155	0.933	25.528	0	281	10.165	15.886	0.845	23.815	2272	1.51	0.662	0.899	0.384129
47	IFT88_KAN487-10_5.tif:0002-0403	1.122	36.701	0	206	89.236	41.3	0.74	41.162	3927	1.33	0.752	0.836	0.663942
48	IFT88_KAN487-10_5.tif:0003-0544	1.101	49.657	0	246	33.752	55.736	0.953	54.652	5214	1.113	0.898	0.917	0.881537
49	IFT88_KAN487-10_5.tif:0004-0612	0.849	114.062	0	427	85.944	62.65	0.861	96.842	9239	1.511	0.662	0.905	1.56205
50	IFT88_KAN487-10_5.tif:0005-0615	1.006	104.427	0	596	16.05	62.883	0.719	105.081	10025	1.652	0.605	0.828	1.69494
51	IFT88_KAN487-10_5.tif:0006-0779	1.426	78.993	0	616	134.601	79.869	0.733	112.607	10743	2.063	0.485	0.847	1.81633
52	IFT88_KAN487-10_6.tif:0001-0233	1.027	57.867	0	165	32.436	23.867	0.889	59.443	5671	1.347	0.743	0.891	0.958802
53	IFT88_KAN487-10_6.tif:0002-0277	0.797	29.75	0	172	95.224	28.338	0.911	23.699	2261	1.348	0.742	0.899	0.38227
54	IFT88_KAN487-10_6.tif:0003-0474	0.807	66.052	0	202	57.898	48.57	0.923	53.311	5086	1.236	0.809	0.901	0.859895
55	IFT88_KAN487-10_6.tif:0004-0487	1.111	60.009	0	383	96.831	49.887	0.866	66.675	6361	1.105	0.905	0.876	1.07546
56	IFT88_KAN487-10_6.tif:0005-0726	1.006	82.177	0	368	70.925	74.375	0.954	82.691	7889	1.126	0.888	0.95	1.3338
57	IFT88_KAN487-10_6.tif:0006-0853	1.426	87.794	0	567	136.518	87.357	0.868	125.153	11940	1.401	0.714	0.928	2.01871
58	IFT88_KAN487-10_6.tif:0007-0885	0.975	53.527	0	223	29.67	90.721	0.9	52.179	4978	1.207	0.828	0.882	0.841636
59	IFT88_KAN487-10_6.tif:0008-0908	0.975	68.882	0	369	94.445	92.931	0.669	67.147	6406	1.516	0.659	0.788	1.08307
										5995.29				1.01363
60	IFT88_KAN487-11_1.tif:0001-0182	0.849	88.519	0	445	136.688	18.712	0.936	75.155	7170	1.232	0.812	0.942	1.21224
61	IFT88_KAN487-11_1.tif:0002-0205	1.3	52.895	0	396	20.196	21	0.854	68.751	6559	1.241	0.806	0.936	1.10894
62	IFT88_KAN487-11_1.tif:0003-0221	0.985	35.17	0	306	86.391	22.619	0.922	34.653	3306	1.058	0.945	0.913	0.558949
63	IFT88_KAN487-11_1.tif:0004-0334	0.88	45.405	0	350	129.363	34.172	0.924	39.978	3814	1.193	0.838	0.903	0.644837
64	IFT88_KAN487-11_1.tif:0005-0437	1.09	95.25	0	445	107.595	44.839	0.944	103.833	9906	1.141	0.876	0.92	1.67482
65	IFT88_KAN487-11_1.tif:0006-0446	1.237	63.28	0	308	15.852	45.568	0.665	78.268	7467	1.435	0.697	0.822	1.26245
66	IFT88_KAN487-11_1.tif:0007-0667	1.111	34.123	0	220	52.539	68.272	0.904	37.913	3617	1.164	0.859	0.926	0.61153
67	IFT88_KAN487-11_1.tif:0008-0746	1.205	37.765	0	132	46.051	76.484	0.808	45.523	4343	1.348	0.742	0.849	0.734276
68	IFT88_KAN487-11_1.tif:0009-0776	1.321	103.333	0	609	98.841	79.491	0.838	136.474	13020	1.554	0.643	0.887	2.20131
69	IFT88_KAN487-11_1.tif:0010-0791	0.954	4.451	0	22	121.698	80.992	0.722	4.245	405	2.51	0.398	0.901	0.0684738
70	IFT88_KAN487-11_1.tif:0011-0958	1.897	43.939	0	312	128.923	98.176	0.651	83.362	7953	1.081	0.925	0.769	1.34462
71	IFT88_KAN487-11_2.tif:0001-0041	0.755	63.861	0	209	10.53	4.222	0.958	48.196	4598	1.198	0.835	0.954	0.777389
72	IFT88_KAN487-11_2.tif:0002-0295	0.985	44.989	0	266	83.003	30.224	0.827	44.328	4229	1.398	0.715	0.879	0.715002
73	IFT88_KAN487-11_2.tif:0003-0352	0.943	42.233	0	131	8.384	36.133	0.882	39.842	3801	1.478	0.677	0.9	0.642639
74	IFT88_KAN487-11_2.tif:0004-0381	0.996	43.495	0	255	121.444	39.109	0.711	43.311	4132	1.326	0.754	0.83	0.698602
75	IFT88_KAN487-11_2.tif:0005-0543	1.153	80.245	0	408	108.032	55.667	0.91	92.523	8827	1.111	0.9	0.924	1.49239
76	IFT88_KAN487-11_2.tif:0006-0559	1.352	66	0	425	64.705	57.227	0.695	89.243	8514	1.706	0.586	0.814	1.43947
77	IFT88_KAN487-11_2.tif:0007-0631	1.132	60.981	0	272	26.74	64.691	0.799	69.034	6586	1.504	0.665	0.874	1.1135
78	IFT88_KAN487-11_2.tif:0008-0755	0.943	100.022	0	315	9.629	77.292	0.882	94.358	9002	1.255	0.797	0.891	1.52198
79	IFT88_KAN487-11_2.tif:0009-0886	1.384	60.091	0	290	141.457	90.744	0.833	83.142	7932	1.277	0.783	0.895	1.34107
80	IFT88_KAN487-11_2.tif:0010-0953	1.394	38.985	0	199	47.189	97.754	0.761	54.348	5185	1.128	0.886	0.829	0.876633
81	IFT88_KAN487-11_3.tif:0001-0223	0.922	34.477	0	142	99.726	22.957	0.76	31.802	3034	1.146	0.873	0.85	0.512962
82	IFT88_KAN487-11_3.tif:0002-0463	0.723	10.681	0	104	71.47	47.465	0.954	7.725	737	1.084	0.923	0.932	0.124605
83	IFT88_KAN487-11_3.tif:0003-0470	0.629	15.683	0	74	63.563	48.182	0.694	9.863	941	2.403	0.416	0.828	0.159096
84	IFT88_KAN487-11_3.tif:0004-0503	1.153	26.991	0	178	4.695	51.538	0.955	31.121	2969	1.272	0.786	0.921	0.501972
85	IFT88_KAN487-11_3.tif:0005-0559	0.839	32.475	0	249	134.617	57.217	0.925	27.232	2598	1.244	0.804	0.92	0.439247
86	IFT88_KAN487-11_3.tif:0006-0566	0.849	24.469	0	72	112.374	57.99	0.923	20.775	1982	1.093	0.915	0.88	0.335099
87	IFT88_KAN487-11_3.tif:0007-0636	0.807	17.156	0	97	45.943	65.13	0.859	13.847	1321	1.248	0.801	0.901	0.223343
88	IFT88_KAN487-11_3.tif:0008-0812	1.331	78.772	0	406	38.325	83.171	0.823	104.861	10004	1.127	0.887	0.879	1.69139
89	IFT88_KAN487-11_3.tif:0009-0839	1.184	104.929	0	363	61.03	85.917	0.923	124.283	11857	1.033	0.969	0.908	2.00468
90	IFT88_KAN487-11_3.tif:0010-0871	1.101	48.752	0	202	4.591	89.244	0.777	53.657	5119	1.68	0.595	0.857	0.865475
91	IFT88_KAN487-11_4.tif:0001-0188	0.943	56.189	0	162	25.04	19.285	0.976	53.007	5057	1.106	0.904	0.909	0.854992
92	IFT88_KAN487-11_4.tif:0002-0418	0.765	45.767	0	194	86.953	42.789	0.994	35.02	3341	1.313	0.762	0.936	0.564866
93	IFT88_KAN487-11_4.tif:0003-0463	0.797	36.329	0	182	59.545	47.47	0.944	28.94	2761	1.197	0.835	0.905	0.466805
94	IFT88_KAN487-11_4.tif:0004-0471	0.975	63.043	0	285	23.555	48.179	0.943	61.455	5863	1.187	0.843	0.921	0.991264
95	IFT88_KAN487-11_4.tif:0005-0568	0.786	23.427	0	97	52.985	58.156	0.912	18.417	1757	1.212	0.825	0.943	0.297058
96	IFT88_KAN487-11_4.tif:0006-0621	0.943	91.878	0	319	91.179	63.617	0.866	86.674	8269	1.364	0.733	0.923	1.39805
97	IFT88_KAN487-11_4.tif:0007-0692	1.415	18.244	0	80	123.897	70.956	0.728	25.817	2463	1.49	0.671	0.841	0.416422
98	IFT88_KAN487-11_4.tif:0008-0775	1.205	69.148	0	368	140.156	79.348	0.851	83.352	7952	1.278	0.782	0.888	1.34445
99	IFT88_KAN487-11_4.tif:0009-0885	0.765	19.973	0	107	7.076	90.622	0.888	15.283	1458	1.316	0.76	0.918	0.246506
100	IFT88_KAN487-11_5.tif:0001-0012	0.88	45.488	0	227	10.609	1.21	0.971	40.051	3821	1.089	0.918	0.933	0.646021
101	IFT88_KAN487-11_5.tif:0002-0032	1.205	55.435	0	362	88.151	3.243	0.901	66.822	6375	1.186	0.843	0.895	1.07783
102	IFT88_KAN487-11_5.tif:0003-0439	0.975	14.312	0	160	125.577	44.901	0.924	13.951	1331	1.331	0.751	0.944	0.225034
103	IFT88_KAN487-11_5.tif:0004-0555	1.3	8.266	0	118	27.94	56.943	0.848	10.744	1025	1.443	0.693	0.902	0.173298
104	IFT88_KAN487-11_5.tif:0005-0687	1.321	35.452	0	268	20.046	70.47	0.66	46.822	4467	1.863	0.537	0.834	0.75524
105	IFT88_KAN487-11_5.tif:0006-0796	1.321	67.683	0	387	101.722	81.541	0.778	89.389	8528	1.551	0.645	0.846	1.44184
106	IFT88_KAN487-11_5.tif:0007-0921	1.247	45.857	0	348	42.101	94.256	0.739	57.2	5457	1.593	0.628	0.885	0.922621
107	IFT88_KAN487-11_5.tif:0008-1026	0.723	7.913	0	59	53.515	105.053	0.839	5.723	546	1.302	0.768	0.89	0.0923128
108	IFT88_KAN487-11_6.tif:0001-0082	1.352	123	0	753	62.16	8.383	0.868	166.316	15867	1.425	0.702	0.925	2.68265
109	IFT88_KAN487-11_6.tif:0002-0143	0.922	19.909	0	118	119.034	14.684	0.935	18.364	1752	1.313	0.762	0.926	0.296213
110	IFT88_KAN487-11_6.tif:0003-0208	0.702	120.015	0	333	1.587	21.337	0.878	84.285	8041	1.136	0.88	0.882	1.3595
111	IFT88_KAN487-11_6.tif:0004-0297	0.828	22.278	0	232	101.377	30.4	0.869	18.448	1760	1.438	0.696	0.908	0.297565
112	IFT88_KAN487-11_6.tif:0005-0463	0.87	56.602	0	261	91.168	47.414	0.763	49.244	4698	1.921	0.52	0.883	0.794296
113	IFT88_KAN487-11_6.tif:0006-0695	0.755	36.194	0	152	51.587	71.178	0.98	27.316	2606	1.156	0.865	0.923	0.440599
114	IFT88_KAN487-11_6.tif:0007-0708	1.143	18.064	0	184	20.694	72.521	0.844	20.639	1969	1.678	0.596	0.879	0.332901
115	IFT88_KAN487-11_6.tif:0008-0928	1.226	31.538	0	199	130.013	95.043	0.851	38.678	3690	1.191	0.84	0.914	0.623872
										5031.82				0.850735
116	IFT88_KAN487-12_1.tif:0001-0024	0.818	48.179	0	274	7.125	2.478	0.969	39.391	3758	1.057	0.946	0.912	0.635369
117	IFT88_KAN487-12_1.tif:0002-0027	0.87	24.193	0	161	111.424	2.759	0.94	21.048	2008	1.077	0.929	0.96	0.339495
118	IFT88_KAN487-12_1.tif:0003-0041	0.639	45.18	0	133	132.806	4.269	1	28.888	2756	1.191	0.839	0.931	0.46596
119	IFT88_KAN487-12_1.tif:0004-0095	0.901	55.5	0	278	69.812	9.677	0.733	50.03	4773	1.717	0.583	0.878	0.806976
120	IFT88_KAN487-12_1.tif:0005-0219	0.954	31.736	0	336	1.945	22.519	0.852	30.272	2888	1.191	0.84	0.871	0.488277
121	IFT88_KAN487-12_1.tif:0006-0298	0.912	61.345	0	304	98.955	30.535	0.912	55.942	5337	1.213	0.824	0.902	0.902332
122	IFT88_KAN487-12_1.tif:0007-0360	1.059	95.337	0	470	25.821	36.871	0.964	100.93	9629	1.049	0.954	0.89	1.62799
123	IFT88_KAN487-12_1.tif:0008-0418	1.017	37.876	0	172	51.154	42.781	0.864	38.51	3674	1.243	0.804	0.924	0.621167
124	IFT88_KAN487-12_1.tif:0009-0634	0.996	67.811	0	378	35.804	64.953	0.857	67.524	6442	1.303	0.767	0.945	1.08916
125	IFT88_KAN487-12_1.tif:0010-0774	1.174	132.777	0	967	128.431	79.26	0.838	155.876	14871	1.499	0.667	0.918	2.51426
126	IFT88_KAN487-12_1.tif:0011-0795	1.205	80.852	0	435	141.067	81.508	0.861	97.46	9298	1.276	0.783	0.927	1.57202
127	IFT88_KAN487-12_1.tif:0012-0815	0.755	11.708	0	80	121.852	83.52	0.726	8.836	843	2.022	0.494	0.889	0.142527
128	IFT88_KAN487-12_1.tif:0013-0893	1.216	74.552	0	548	17.435	91.507	0.948	90.647	8648	1.155	0.866	0.935	1.46213
129	IFT88_KAN487-12_1.tif:0014-0916	1.289	46.472	0	329	90.132	93.824	0.711	59.914	5716	1.107	0.904	0.807	0.96641
130	IFT88_KAN487-12_1.tif:0015-0998	0.954	85.418	0	342	101.436	102.188	0.875	81.475	7773	1.191	0.839	0.919	1.31419
131	IFT88_KAN487-12_2.tif:0001-0308	1.101	34.524	0	278	75.343	31.561	0.848	37.997	3625	1.186	0.843	0.871	0.612883
132	IFT88_KAN487-12_2.tif:0002-0369	1.09	59.827	0	402	109.432	37.819	0.835	65.218	6222	1.515	0.66	0.924	1.05196
133	IFT88_KAN487-12_2.tif:0003-0576	1.017	8.649	0	114	54.647	59.035	0.909	8.794	839	1.301	0.768	0.915	0.141851
134	IFT88_KAN487-12_2.tif:0004-0618	1.132	84.889	0	553	18.193	63.341	0.799	96.098	9168	1.715	0.583	0.889	1.55004
135	IFT88_KAN487-12_2.tif:0005-0628	0.765	33.945	0	125	85.124	64.367	0.972	25.974	2478	1.174	0.852	0.954	0.418958
136	IFT88_KAN487-12_2.tif:0006-0745	0.849	36.593	0	136	31.421	76.216	0.832	31.068	2964	1.342	0.745	0.871	0.501127
137	IFT88_KAN487-12_2.tif:0007-0849	0.734	14.686	0	119	40.906	86.949	0.864	10.775	1028	1.208	0.828	0.94	0.173805
138	IFT88_KAN487-12_2.tif:0008-0998	0.681	16	0	69	130.026	102.182	0.899	10.901	1040	1.602	0.624	0.929	0.175834
139	IFT88_KAN487-12_3.tif:0001-0068	0.713	31.647	0	317	53.955	6.987	0.891	22.557	2152	1.306	0.766	0.883	0.363841
140	IFT88_KAN487-12_3.tif:0002-0105	1.237	17.178	0	366	125.326	10.765	0.839	21.247	2027	1.378	0.726	0.881	0.342707
141	IFT88_KAN487-12_3.tif:0003-0107	1.3	35.315	0	261	118.178	11.027	0.652	45.9	4379	1.843	0.543	0.79	0.740362
142	IFT88_KAN487-12_3.tif:0004-0145	0.723	13.812	0	72	28.598	14.883	0.904	9.989	953	1.515	0.66	0.914	0.161125
143	IFT88_KAN487-12_3.tif:0005-0213	1.09	34.144	0	140	138.819	21.929	0.769	37.221	3551	1.421	0.704	0.86	0.600371
144	IFT88_KAN487-12_3.tif:0006-0288	1.006	20.5	0	345	94.531	29.564	0.785	20.628	1968	1.557	0.642	0.857	0.332732
145	IFT88_KAN487-12_3.tif:0007-0428	0.681	12.923	0	43	18.774	43.943	0.885	8.805	840	1.434	0.697	0.89	0.14202
146	IFT88_KAN487-12_3.tif:0008-0528	1.059	85.426	0	428	65.485	54.145	0.9	90.437	8628	1.163	0.86	0.927	1.45875
147	IFT88_KAN487-12_3.tif:0009-0537	0.87	39.422	0	153	119.533	54.977	0.882	34.297	3272	1.44	0.694	0.897	0.553201
148	IFT88_KAN487-12_3.tif:0010-0627	0.702	2.075	0	10	84.425	64.235	0.737	1.457	139	1.899	0.527	0.812	0.0235009
149	IFT88_KAN487-12_3.tif:0011-0636	1.027	49.5	0	315	8.717	65.004	0.755	50.847	4851	1.577	0.634	0.867	0.820164
150	IFT88_KAN487-12_3.tif:0012-0785	0.849	66.642	0	235	41.226	80.371	0.95	56.581	5398	1.211	0.826	0.953	0.912646
151	IFT88_KAN487-12_3.tif:0013-0908	1.216	10.181	0	103	86.273	92.951	0.92	12.379	1181	1.243	0.805	0.932	0.199673
152	IFT88_KAN487-12_4.tif:0001-0080	0.975	15.624	0	186	10.56	8.285	0.895	15.23	1453	1.472	0.679	0.944	0.24566
153	IFT88_KAN487-12_4.tif:0002-0226	1.289	57.699	0	343	40.277	23.201	0.851	74.39	7097	1.618	0.618	0.921	1.1999
154	IFT88_KAN487-12_4.tif:0003-0286	1.289	81.593	0	576	123.882	29.321	0.885	105.196	10036	1.328	0.753	0.904	1.6968
155	IFT88_KAN487-12_4.tif:0004-0450	1.174	57.214	0	307	31.291	46.121	0.904	67.168	6408	1.063	0.941	0.889	1.08341
156	IFT88_KAN487-12_4.tif:0005-0520	1.09	57.846	0	342	13.2	53.176	0.663	63.059	6016	1.47	0.68	0.797	1.01713
157	IFT88_KAN487-12_4.tif:0006-0570	1.163	55.901	0	287	56.205	58.342	0.885	65.04	6205	1.35	0.74	0.877	1.04909
158	IFT88_KAN487-12_4.tif:0007-0594	0.734	29.214	0	131	79.54	60.784	0.953	21.435	2045	1.366	0.732	0.915	0.34575
159	IFT88_KAN487-12_4.tif:0008-0664	1.184	88.434	0	527	108.945	68.048	0.871	104.745	9993	1.288	0.776	0.919	1.68953
160	IFT88_KAN487-12_4.tif:0009-0920	0.828	27.241	0	152	26.787	94.248	0.852	22.557	2152	1.393	0.718	0.919	0.363841
161	IFT88_KAN487-12_4.tif:0010-0965	0.86	32.512	0	245	55.088	98.759	0.915	27.945	2666	1.141	0.876	0.921	0.450743
162	IFT88_KAN487-12_5.tif:0001-0125	0.734	9.214	0	37	1.414	12.853	0.77	6.761	645	1.095	0.913	0.8	0.109051
163	IFT88_KAN487-12_5.tif:0002-0277	0.964	47.804	0	199	133.036	28.323	0.89	46.099	4398	1.127	0.887	0.876	0.743575
164	IFT88_KAN487-12_5.tif:0003-0392	1.038	17.101	0	93	102.513	40.195	0.882	17.746	1693	1.291	0.775	0.93	0.286237
165	IFT88_KAN487-12_5.tif:0004-0445	0.639	31.541	0	89	51.55	45.55	0.913	20.167	1924	1.287	0.777	0.904	0.325293
166	IFT88_KAN487-12_5.tif:0005-0484	1.268	63.876	0	455	124.397	49.635	0.793	81.014	7729	1.091	0.917	0.867	1.30675
167	IFT88_KAN487-12_5.tif:0006-0609	0.901	36.756	0	144	71.44	62.313	0.791	33.133	3161	1.22	0.82	0.864	0.534434
168	IFT88_KAN487-12_5.tif:0007-0634	0.985	23.564	0	265	28.403	64.894	0.892	23.217	2215	1.399	0.715	0.922	0.374492
169	IFT88_KAN487-12_5.tif:0008-0836	0.88	30.893	0	115	127.022	85.643	0.863	27.2	2595	1.434	0.697	0.894	0.438739
170	IFT88_KAN487-12_5.tif:0009-0840	1.069	41.333	0	282	29.32	85.956	0.938	44.192	4216	1.168	0.856	0.949	0.712804
171	IFT88_KAN487-12_5.tif:0010-0896	1.352	87.209	0	654	115.148	91.74	0.686	117.921	11250	1.57	0.637	0.822	1.90205
172	IFT88_KAN487-12_5.tif:0011-0964	0.734	9.657	0	50	53.675	98.73	0.883	7.086	676	1.445	0.692	0.909	0.114292
173	IFT88_KAN487-12_6.tif:0001-0090	0.755	287.653	6	1082	83.776	9.271	1	217.09	20711	1.024	0.977	0.954	3.50163
174	IFT88_KAN487-12_6.tif:0002-0169	0.744	76.423	0	278	74.113	17.371	0.93	56.875	5426	1.457	0.686	0.904	0.91738
175	IFT88_KAN487-12_6.tif:0003-0245	0.975	81.204	0	409	110.321	25.15	0.803	79.159	7552	1.592	0.628	0.907	1.27682
176	IFT88_KAN487-12_6.tif:0004-0443	0.985	37.309	0	150	120.608	45.367	0.88	36.76	3507	1.26	0.794	0.879	0.592932
177	IFT88_KAN487-12_6.tif:0005-0496	0.922	65.398	0	240	38.029	50.801	0.88	60.323	5755	1.139	0.878	0.867	0.973004
178	IFT88_KAN487-12_6.tif:0006-0732	1.143	117.752	0	437	126.455	74.923	0.918	134.535	12835	1.5	0.667	0.92	2.17003
179	IFT88_KAN487-12_6.tif:0007-0826	1.583	99.762	0	652	115.028	84.563	0.768	157.899	15064	1.536	0.651	0.87	2.54689
180	IFT88_KAN487-12_6.tif:0008-0997	0.786	35.787	0	158	71.153	102.128	0.899	28.133	2684	1.287	0.777	0.909	0.453787
										4972.68				0.840736

## Sheet: RawData_Replicate3
	Label	Area	Mean	Min	Max	X	Y	Circ	IntDen	RawIntDen	AR	Round	Noramlized Intensity
1	IFT88_KAN487-13_1.tif:0001-0126	0.765	165.055	0	582	23.418	12.926	0.844	126.296	12049	1.502	0.666	0.885	0.724993
2	IFT88_KAN487-13_1.tif:0002-0129	0.922	108.864	0	456	77.878	13.183	0.949	100.416	9580	1.119	0.893	0.951	0.576432
3	IFT88_KAN487-13_1.tif:0003-0145	1.195	144.474	0	865	2.134	14.781	0.853	172.636	16470	1.529	0.654	0.927	0.991006
4	IFT88_KAN487-13_1.tif:0004-0322	0.88	47.095	0	302	62.322	32.953	0.971	41.466	3956	1.13	0.885	0.939	0.238034
5	IFT88_KAN487-13_1.tif:0005-0537	0.985	211.511	0	939	80.503	54.995	0.922	208.4	19882	1.244	0.804	0.922	1.19631
6	IFT88_KAN487-13_1.tif:0006-0702	0.755	413.375	16	1319	100.527	71.916	0.98	311.972	29763	1.21	0.826	0.923	1.79085
7	IFT88_KAN487-13_1.tif:0007-0744	1.3	240.548	0	1642	136.328	76.152	0.825	312.653	29828	1.61	0.621	0.873	1.79476
8	IFT88_KAN487-13_1.tif:0008-0895	0.818	217.167	6	684	62.093	91.609	0.949	177.552	16939	1.211	0.826	0.945	1.01923
9	IFT88_KAN487-13_1.tif:0009-0931	1.52	177.379	0	1275	130.701	95.348	0.86	269.593	25720	1.532	0.653	0.903	1.54758
10	IFT88_KAN487-13_1.tif:0010-0942	1.321	308.675	0	1499	93.38	96.483	0.896	407.671	38893	1.309	0.764	0.903	2.34021
11	IFT88_KAN487-13_1.tif:0011-0988	1.258	165.542	0	569	91.006	101.094	0.914	208.222	19865	1.274	0.785	0.934	1.19528
12	IFT88_KAN487-13_1.tif:0012-0990	1.132	120.62	0	809	57.721	101.297	0.832	136.547	13027	1.534	0.652	0.9	0.783839
13	IFT88_KAN487-13_2.tif:0001-0036	0.985	162.117	0	675	118.017	3.697	0.922	159.733	15239	1.466	0.682	0.926	0.916936
14	IFT88_KAN487-13_2.tif:0002-0186	1.488	234.528	0	1166	46.352	19.212	0.755	349.077	33303	1.868	0.535	0.882	2.00385
15	IFT88_KAN487-13_2.tif:0003-0298	0.975	278.71	0	1530	121.86	30.54	0.943	271.69	25920	1.073	0.932	0.903	1.55962
16	IFT88_KAN487-13_2.tif:0004-0334	0.86	171.268	0	977	30.066	34.213	0.962	147.207	14044	1.157	0.864	0.959	0.845033
17	IFT88_KAN487-13_2.tif:0005-0341	0.901	184.837	0	803	73.933	34.929	0.96	166.62	15896	1.237	0.808	0.935	0.956468
18	IFT88_KAN487-13_2.tif:0006-0659	1.195	287.36	0	1877	110.204	67.52	0.916	343.375	32759	1.176	0.85	0.946	1.97112
19	IFT88_KAN487-13_2.tif:0007-0773	1.132	216.639	0	1328	86.957	79.117	0.883	245.244	23397	1.048	0.954	0.896	1.40781
20	IFT88_KAN487-13_2.tif:0008-0808	0.755	271.75	6	1128	141.762	82.802	0.958	205.088	19566	1.059	0.944	0.947	1.17729
21	IFT88_KAN487-13_2.tif:0009-0857	1.017	127.124	0	688	50.81	87.698	0.842	129.252	12331	1.427	0.701	0.851	0.741961
22	IFT88_KAN487-13_2.tif:0010-0954	1.268	225.909	0	1274	87.734	97.593	0.86	286.522	27335	1.449	0.69	0.896	1.64476
23	IFT88_KAN487-13_2.tif:0011-1001	0.954	153.912	0	908	34.593	102.541	0.892	146.809	14006	1.421	0.704	0.91	0.842746
24	IFT88_KAN487-13_3.tif:0001-0113	0.901	106.035	0	628	10.435	11.599	0.946	95.584	9119	1.059	0.944	0.92	0.548694
25	IFT88_KAN487-13_3.tif:0002-0330	1.258	155.542	0	839	28.29	33.778	0.877	195.644	18665	1.525	0.656	0.909	1.12308
26	IFT88_KAN487-13_3.tif:0003-0473	0.964	216.315	0	1006	48.594	48.478	0.932	208.599	19901	1.256	0.796	0.906	1.19745
27	IFT88_KAN487-13_3.tif:0004-0497	1.163	260.874	0	1749	110.831	50.853	0.907	303.523	28957	1.089	0.918	0.917	1.74235
28	IFT88_KAN487-13_3.tif:0005-0581	1.174	243.321	0	1151	74.173	59.503	0.943	285.652	27252	1.397	0.716	0.941	1.63976
29	IFT88_KAN487-13_3.tif:0006-0639	1.436	195.088	0	976	47.797	65.489	0.8	280.149	26727	1.635	0.612	0.91	1.60817
30	IFT88_KAN487-13_3.tif:0007-0714	1.163	97.883	0	443	112.822	73.124	0.935	113.885	10865	1.162	0.861	0.917	0.653751
31	IFT88_KAN487-13_3.tif:0008-0731	0.807	78.597	0	238	73.602	74.937	0.972	63.436	6052	1.158	0.864	0.945	0.364151
32	IFT88_KAN487-13_3.tif:0009-0834	0.818	239.628	0	1145	12.874	85.442	0.87	195.916	18691	1.574	0.635	0.929	1.12464
33	IFT88_KAN487-13_3.tif:0010-0875	0.807	139.039	0	463	33.905	89.593	0.957	112.219	10706	1.058	0.945	0.901	0.644184
34	IFT88_KAN487-13_3.tif:0011-0938	1.143	71.899	0	389	95.452	96.129	0.93	82.146	7837	1.068	0.936	0.936	0.471555
35	IFT88_KAN487-13_3.tif:0012-0985	1.027	210.898	0	1060	87.228	100.859	0.873	216.639	20668	1.722	0.581	0.947	1.2436
36	IFT88_KAN487-13_4.tif:0001-0060	1.069	117.147	0	509	17.236	6.187	0.734	125.248	11949	1.885	0.53	0.85	0.718976
37	IFT88_KAN487-13_4.tif:0002-0086	1.059	136.208	0	769	66.262	8.74	0.9	144.199	13757	1.266	0.79	0.94	0.827764
38	IFT88_KAN487-13_4.tif:0003-0099	0.985	162.404	0	876	96.542	10.169	0.934	160.016	15266	1.296	0.771	0.94	0.918561
39	IFT88_KAN487-13_4.tif:0004-0164	1.069	117.618	0	780	11.739	16.759	0.859	125.751	11997	1.322	0.757	0.891	0.721864
40	IFT88_KAN487-13_4.tif:0005-0197	0.828	35.81	0	200	137.623	20.233	0.913	29.653	2829	1.258	0.795	0.913	0.170222
41	IFT88_KAN487-13_4.tif:0006-0307	1.006	66.281	0	258	68.083	31.479	0.899	66.696	6363	1.363	0.734	0.906	0.382864
42	IFT88_KAN487-13_4.tif:0007-0364	0.975	109.548	0	343	126.669	37.285	0.924	106.789	10188	1.137	0.879	0.935	0.613016
43	IFT88_KAN487-13_4.tif:0008-0379	0.713	75.735	0	192	6.062	38.84	0.905	53.982	5150	1.239	0.807	0.932	0.309877
44	IFT88_KAN487-13_4.tif:0009-0380	0.922	94.75	0	448	100.152	38.875	0.892	87.398	8338	1.379	0.725	0.889	0.5017
45	IFT88_KAN487-13_4.tif:0010-0388	0.807	195.351	0	728	23.161	39.709	0.903	157.668	15042	1.125	0.889	0.933	0.905083
46	IFT88_KAN487-13_4.tif:0011-0584	0.922	406.739	0	1645	91.647	59.79	0.982	375.177	35793	1.086	0.921	0.946	2.15368
47	IFT88_KAN487-13_4.tif:0012-0779	1.143	129.963	0	716	138.945	79.764	0.959	148.486	14166	1.068	0.936	0.924	0.852373
48	IFT88_KAN487-13_4.tif:0013-0847	0.943	66.567	0	264	84.273	86.7	0.943	62.797	5991	1.22	0.82	0.909	0.360481
49	IFT88_KAN487-13_4.tif:0014-0905	1.289	135.203	0	866	55.33	92.705	0.948	174.313	16630	1.144	0.874	0.946	1.00063
50	IFT88_KAN487-13_4.tif:0015-0942	1.101	209.105	0	870	113.295	96.541	0.843	230.14	21956	1.602	0.624	0.921	1.3211
51	IFT88_KAN487-13_4.tif:0016-0955	0.786	173.68	0	579	19.536	97.871	0.88	136.537	13026	1.188	0.842	0.92	0.783779
52	IFT88_KAN487-13_5.tif:0001-0162	1.111	96.972	0	381	111.527	16.614	0.866	107.743	10279	1.331	0.751	0.906	0.618491
53	IFT88_KAN487-13_5.tif:0002-0204	1.53	194.315	0	1366	124.544	20.884	0.806	297.37	28370	1.669	0.599	0.888	1.70703
54	IFT88_KAN487-13_5.tif:0003-0223	1.111	139.642	0	944	56.121	22.86	0.877	155.152	14802	1.316	0.76	0.914	0.890642
55	IFT88_KAN487-13_5.tif:0004-0289	1.237	125.025	0	866	43.85	29.596	0.883	154.639	14753	1.3	0.769	0.937	0.887693
56	IFT88_KAN487-13_5.tif:0005-0306	0.943	244.878	0	1037	105.893	31.385	0.925	231.01	22039	1.246	0.803	0.928	1.32609
57	IFT88_KAN487-13_5.tif:0006-0310	0.901	76.314	0	274	11.82	31.718	0.884	68.792	6563	1.478	0.677	0.925	0.394898
58	IFT88_KAN487-13_5.tif:0007-0416	0.786	132.333	0	755	55.8	42.666	0.899	104.032	9925	1.269	0.788	0.898	0.597191
59	IFT88_KAN487-13_5.tif:0008-0417	1.237	157.169	0	973	72.27	42.786	0.825	194.397	18546	1.342	0.745	0.884	1.11592
60	IFT88_KAN487-13_5.tif:0009-0419	1.038	99.899	0	485	109.285	42.868	0.871	103.666	9890	1.365	0.733	0.921	0.595085
61	IFT88_KAN487-13_5.tif:0010-0479	1.069	147.392	0	852	14.412	49.09	0.859	157.584	15034	1.689	0.592	0.891	0.904601
62	IFT88_KAN487-13_5.tif:0011-0533	1.342	146.906	0	1061	84.177	54.57	0.816	197.101	18804	1.786	0.56	0.921	1.13144
63	IFT88_KAN487-13_5.tif:0012-0591	0.849	106.235	0	397	10.179	60.496	0.861	90.196	8605	1.374	0.728	0.89	0.517766
64	IFT88_KAN487-13_5.tif:0013-0670	0.828	124.152	0	440	133.941	68.596	0.982	102.806	9808	1.102	0.908	0.919	0.590151
65	IFT88_KAN487-13_5.tif:0014-0672	1.321	144.746	0	1006	47.489	68.846	0.871	191.168	18238	1.5	0.667	0.897	1.09739
66	IFT88_KAN487-13_5.tif:0015-0749	0.901	46.465	0	322	101.102	76.724	0.946	41.886	3996	1.068	0.936	0.91	0.240441
67	IFT88_KAN487-13_5.tif:0016-0870	0.922	140.659	0	778	26.441	89.102	0.904	129.744	12378	1.386	0.722	0.921	0.744789
68	IFT88_KAN487-13_5.tif:0017-0871	1.132	185.148	0	1211	123.379	89.229	0.91	209.595	19996	1.138	0.878	0.908	1.20317
69	IFT88_KAN487-13_5.tif:0018-0933	1.08	100.087	0	673	83.354	95.621	0.89	108.057	10309	1.145	0.873	0.932	0.620296
70	IFT88_KAN487-13_5.tif:0019-0966	0.912	189.77	0	804	69.074	98.876	0.894	173.055	16510	1.143	0.875	0.911	0.993413
71	IFT88_KAN487-13_6.tif:0001-0010	1.352	173.287	0	983	136.467	1.069	0.868	234.311	22354	1.464	0.683	0.918	1.34505
72	IFT88_KAN487-13_6.tif:0002-0108	1.059	150.832	0	738	68.413	11.091	0.836	159.681	15234	1.641	0.609	0.918	0.916635
73	IFT88_KAN487-13_6.tif:0003-0110	1.027	212.735	0	1111	46.448	11.249	0.93	218.526	20848	1.287	0.777	0.916	1.25443
74	IFT88_KAN487-13_6.tif:0004-0307	1.09	67.635	0	335	25.583	31.51	0.825	73.729	7034	1.535	0.651	0.893	0.423238
75	IFT88_KAN487-13_6.tif:0005-0322	1.038	145.485	0	673	78.442	33.011	0.91	150.97	14403	1.168	0.856	0.921	0.866634
76	IFT88_KAN487-13_6.tif:0006-0369	1.342	198.82	0	1104	97.556	37.783	0.875	266.753	25449	1.489	0.671	0.905	1.53128
77	IFT88_KAN487-13_6.tif:0007-0452	0.996	166.463	0	652	17.746	46.312	0.996	165.76	15814	1.037	0.964	0.922	0.951534
78	IFT88_KAN487-13_6.tif:0008-0455	1.216	142.517	0	777	114.962	46.599	0.858	173.286	16532	1.446	0.691	0.896	0.994736
79	IFT88_KAN487-13_6.tif:0009-0478	0.975	87.634	0	585	1.984	48.994	0.855	85.427	8150	1.501	0.666	0.903	0.490388
80	IFT88_KAN487-13_6.tif:0010-0530	0.702	31.985	0	139	37.063	54.258	0.964	22.463	2143	1.25	0.8	0.931	0.128945
81	IFT88_KAN487-13_6.tif:0011-0539	1.027	129.633	0	507	48.571	55.235	0.961	133.162	12704	1.188	0.842	0.925	0.764404
82	IFT88_KAN487-13_6.tif:0012-0542	0.996	134.716	0	683	141.81	55.531	0.846	134.147	12798	1.376	0.727	0.931	0.77006
83	IFT88_KAN487-13_6.tif:0013-0694	1.017	163.392	0	830	83.867	71.063	0.921	166.127	15849	1.422	0.703	0.928	0.95364
84	IFT88_KAN487-13_6.tif:0014-0751	1.017	150.948	0	597	47.474	76.926	0.951	153.475	14642	1.107	0.903	0.919	0.881014
85	IFT88_KAN487-13_6.tif:0015-0832	1.048	139.02	0	710	4.313	85.139	0.907	145.719	13902	1.261	0.793	0.917	0.836488
86	IFT88_KAN487-13_6.tif:0016-0880	1.184	277.265	0	1690	103.853	90.167	0.981	328.407	31331	1.191	0.84	0.938	1.8852
87	IFT88_KAN487-13_6.tif:0017-0952	1.31	208.648	0	1304	132.114	97.493	0.925	273.377	26081	1.149	0.87	0.919	1.5693
88	IFT88_KAN487-13_6.tif:0018-1005	1.478	246.468	0	1680	71.977	102.981	0.845	364.266	34752	1.54	0.65	0.922	2.09104
										16619.5				1
89	IFT88_KAN487-14_1.tif:0001-0031	1.258	155.025	0	1084	38.075	3.234	0.853	194.994	18603	1.462	0.684	0.886	1.11935
90	IFT88_KAN487-14_1.tif:0002-0151	1.205	125.73	0	997	64.907	15.504	0.818	151.557	14459	1.565	0.639	0.865	0.870003
91	IFT88_KAN487-14_1.tif:0003-0309	1.069	96.265	0	310	112.356	31.689	0.886	102.921	9819	1.538	0.65	0.907	0.590813
92	IFT88_KAN487-14_1.tif:0004-0311	1.017	170.433	0	735	32.532	31.884	0.933	173.286	16532	1.106	0.904	0.951	0.994736
93	IFT88_KAN487-14_1.tif:0005-0442	0.996	200.284	0	1143	118.229	45.31	0.932	199.438	19027	1.227	0.815	0.922	1.14486
94	IFT88_KAN487-14_1.tif:0006-0560	1.111	205.519	0	1321	62.654	57.414	0.932	228.347	21785	1.099	0.91	0.922	1.31081
95	IFT88_KAN487-14_1.tif:0007-0567	1.31	138.8	0	1000	34.745	58.037	0.899	181.86	17350	1.397	0.716	0.936	1.04396
96	IFT88_KAN487-14_1.tif:0008-0637	1.122	132.336	0	804	105.117	65.286	0.874	148.423	14160	1.296	0.772	0.907	0.852012
97	IFT88_KAN487-14_1.tif:0009-0708	1.006	212.75	0	1147	44.337	72.525	0.911	214.081	20424	1.281	0.781	0.919	1.22892
98	IFT88_KAN487-14_1.tif:0010-0827	1.122	152.645	0	704	102.551	84.743	0.971	171.2	16333	1.106	0.904	0.926	0.982763
99	IFT88_KAN487-14_1.tif:0011-0859	0.755	51.986	0	317	55.738	88.019	0.923	39.234	3743	1.095	0.913	0.947	0.225218
100	IFT88_KAN487-14_1.tif:0012-0902	1.069	180.343	0	935	23.484	92.374	0.855	192.814	18395	1.607	0.622	0.944	1.10683
101	IFT88_KAN487-14_1.tif:0013-1000	1.279	152.639	0	1106	83.571	102.374	0.867	195.193	18622	1.501	0.666	0.907	1.12049
102	IFT88_KAN487-14_2.tif:0001-0018	1.237	106.415	0	420	43.667	1.876	0.849	131.621	12557	1.507	0.663	0.915	0.755559
103	IFT88_KAN487-14_2.tif:0002-0118	1.069	112.324	0	623	1.461	12.107	0.859	120.091	11457	1.519	0.658	0.907	0.689372
104	IFT88_KAN487-14_2.tif:0003-0163	1.446	244.587	0	1578	87.599	16.717	0.726	353.794	33753	2.134	0.469	0.863	2.03093
105	IFT88_KAN487-14_2.tif:0004-0213	0.849	126.84	0	593	105.888	21.795	0.861	107.691	10274	1.476	0.677	0.885	0.61819
106	IFT88_KAN487-14_2.tif:0005-0244	0.964	164.359	0	875	83.792	25.029	0.964	158.496	15121	1.092	0.915	0.902	0.909836
107	IFT88_KAN487-14_2.tif:0006-0338	0.996	172.674	0	689	9.686	34.654	0.944	171.944	16404	1.091	0.917	0.936	0.987035
108	IFT88_KAN487-14_2.tif:0007-0353	0.88	127.048	0	620	69.445	36.161	0.893	111.862	10672	1.533	0.652	0.903	0.642138
109	IFT88_KAN487-14_2.tif:0008-0446	0.88	70.583	0	298	118.393	45.711	0.893	62.147	5929	1.255	0.797	0.894	0.35675
110	IFT88_KAN487-14_2.tif:0009-0525	0.985	137.436	0	583	15.922	53.71	0.934	135.415	12919	1.32	0.757	0.949	0.777341
111	IFT88_KAN487-14_2.tif:0010-0572	1.226	207.162	0	1503	89.57	58.592	0.891	254.059	24238	1.394	0.717	0.921	1.45841
112	IFT88_KAN487-14_2.tif:0011-0599	1.247	233.185	0	1211	58.838	61.366	0.88	290.861	27749	1.419	0.705	0.915	1.66967
113	IFT88_KAN487-14_2.tif:0012-0646	1.174	261.741	0	1330	134.328	66.171	0.806	307.276	29315	1.781	0.562	0.889	1.76389
114	IFT88_KAN487-14_2.tif:0013-0798	1.426	302.654	0	1779	41.643	81.757	0.967	431.444	41161	1.08	0.926	0.944	2.47667
115	IFT88_KAN487-14_2.tif:0014-0833	1.331	258.22	0	1538	102.153	85.344	0.929	343.742	32794	1.202	0.832	0.924	1.97323
116	IFT88_KAN487-14_2.tif:0015-0966	1.31	187.448	0	1094	75.559	98.877	0.841	245.6	23431	1.586	0.631	0.896	1.40985
117	IFT88_KAN487-14_3.tif:0001-0070	0.933	149.573	0	441	35.729	7.165	0.856	139.535	13312	1.428	0.7	0.927	0.800988
118	IFT88_KAN487-14_3.tif:0002-0120	0.912	244.839	0	873	128.119	12.319	0.971	223.274	21301	1.244	0.804	0.951	1.28169
119	IFT88_KAN487-14_3.tif:0003-0302	1.321	138.087	0	744	23.437	30.902	0.932	182.374	17399	1.221	0.819	0.937	1.0469
120	IFT88_KAN487-14_3.tif:0004-0388	0.849	296.716	0	1095	132.417	39.751	0.936	251.921	24034	1.335	0.749	0.92	1.44613
121	IFT88_KAN487-14_3.tif:0005-0504	0.996	173.421	0	1055	22.965	51.687	0.873	172.689	16475	1.135	0.881	0.9	0.991307
122	IFT88_KAN487-14_3.tif:0006-0524	1.017	128.969	0	731	73.571	53.723	0.892	131.128	12510	1.29	0.775	0.907	0.752731
123	IFT88_KAN487-14_3.tif:0007-0623	1.038	175.03	0	700	120.8	63.79	0.91	181.63	17328	1.331	0.751	0.921	1.04263
124	IFT88_KAN487-14_3.tif:0008-0713	1.237	211.051	0	1052	42.737	73.058	0.964	261.04	24904	1.33	0.752	0.94	1.49848
125	IFT88_KAN487-14_3.tif:0009-0823	0.681	17.938	0	127	64.539	84.301	0.973	12.222	1166	1.036	0.965	0.909	0.0701586
126	IFT88_KAN487-14_3.tif:0010-0846	1.059	74.129	0	377	34.041	86.655	0.959	78.478	7487	1.218	0.821	0.94	0.450496
127	IFT88_KAN487-14_3.tif:0011-1006	1.342	375.961	0	1409	105.897	102.983	0.931	504.419	48123	1.397	0.716	0.97	2.89558
128	IFT88_KAN487-14_4.tif:0001-0104	1.216	126.784	0	943	101.227	10.686	0.894	154.157	14707	1.329	0.752	0.932	0.884926
129	IFT88_KAN487-14_4.tif:0002-0141	1.132	109.102	0	476	42.662	14.431	0.921	123.508	11783	1.378	0.726	0.939	0.708987
130	IFT88_KAN487-14_4.tif:0003-0159	0.985	174.064	0	855	69.91	16.356	0.953	171.504	16362	1.286	0.777	0.922	0.984507
131	IFT88_KAN487-14_4.tif:0004-0215	1.153	114.373	0	695	100.773	21.981	0.926	131.872	12581	1.082	0.925	0.898	0.757003
132	IFT88_KAN487-14_4.tif:0005-0232	0.964	67.228	0	220	12.152	23.727	0.978	64.83	6185	1.172	0.853	0.944	0.372154
133	IFT88_KAN487-14_4.tif:0006-0437	0.807	208.299	0	801	89.665	44.762	0.903	168.119	16039	1.391	0.719	0.945	0.965072
134	IFT88_KAN487-14_4.tif:0007-0652	0.933	152.449	0	660	13.987	66.731	0.979	142.218	13568	1.221	0.819	0.927	0.816392
135	IFT88_KAN487-14_4.tif:0008-0755	1.006	212.719	0	1055	69.891	77.316	0.973	214.05	20421	1.071	0.934	0.923	1.22874
136	IFT88_KAN487-14_4.tif:0009-0815	1.321	131.968	0	891	13.756	83.429	0.848	174.292	16628	1.46	0.685	0.903	1.00051
137	IFT88_KAN487-14_4.tif:0010-0853	1.101	176	0	974	99.691	87.312	0.924	193.705	18480	1.335	0.749	0.925	1.11195
138	IFT88_KAN487-14_4.tif:0011-0905	0.797	76.961	0	413	80.374	92.626	0.731	61.308	5849	2.164	0.462	0.874	0.351936
139	IFT88_KAN487-14_4.tif:0012-0941	1.258	214.208	0	1107	124.833	96.315	0.808	269.436	25705	1.433	0.698	0.86	1.54668
140	IFT88_KAN487-14_4.tif:0013-0959	0.964	180.75	0	857	29.971	98.209	0.945	174.303	16629	1.139	0.878	0.925	1.00057
141	IFT88_KAN487-14_5.tif:0001-0034	1.132	125.537	0	835	61.186	3.529	0.894	142.113	13558	1.457	0.686	0.947	0.81579
142	IFT88_KAN487-14_5.tif:0002-0048	0.964	196.304	0	924	113.737	4.934	0.978	189.302	18060	1.155	0.866	0.944	1.08668
143	IFT88_KAN487-14_5.tif:0003-0090	1.101	220.248	0	1159	100.341	9.215	0.896	242.403	23126	1.272	0.786	0.921	1.3915
144	IFT88_KAN487-14_5.tif:0004-0197	1.132	161.407	0	1112	73.214	20.191	0.842	182.72	17432	1.682	0.595	0.935	1.04889
145	IFT88_KAN487-14_5.tif:0005-0218	0.88	137.464	0	487	80.007	22.36	0.957	121.034	11547	1.147	0.872	0.913	0.694787
146	IFT88_KAN487-14_5.tif:0006-0278	0.975	268.376	0	1492	49.049	28.446	0.924	261.617	24959	1.062	0.941	0.944	1.50179
147	IFT88_KAN487-14_5.tif:0007-0328	1.405	246.47	0	1642	134.001	33.541	0.775	346.184	33027	1.63	0.613	0.89	1.98725
148	IFT88_KAN487-14_5.tif:0008-0358	0.922	311.034	0	1421	24.218	36.673	0.935	286.899	27371	1.099	0.91	0.912	1.64692
149	IFT88_KAN487-14_5.tif:0009-0435	0.985	209.309	0	1011	19.326	44.592	0.904	206.231	19675	1.337	0.748	0.954	1.18385
150	IFT88_KAN487-14_5.tif:0010-0535	0.88	215.107	0	811	57.221	54.834	0.985	189.397	18069	1.121	0.892	0.971	1.08722
151	IFT88_KAN487-14_5.tif:0011-0689	1.122	139.467	0	667	74.229	70.533	0.941	156.421	14923	1.14	0.877	0.926	0.897922
152	IFT88_KAN487-14_5.tif:0012-0738	0.985	215.106	0	1211	98.929	75.625	0.837	211.943	20220	1.469	0.681	0.895	1.21664
153	IFT88_KAN487-14_5.tif:0013-0788	1.09	153.038	0	915	20.28	80.657	0.861	166.829	15916	1.296	0.772	0.912	0.957672
154	IFT88_KAN487-14_5.tif:0014-0878	1.09	129.192	0	870	49.807	89.918	0.903	140.834	13436	1.279	0.782	0.897	0.808449
155	IFT88_KAN487-14_5.tif:0015-0944	0.744	59.282	0	128	104.722	96.658	0.91	44.118	4209	1.415	0.707	0.959	0.253257
156	IFT88_KAN487-14_5.tif:0016-1022	0.985	140.511	0	823	37.212	104.622	0.876	138.444	13208	1.375	0.727	0.935	0.79473
157	IFT88_KAN487-14_6.tif:0001-0022	1.195	115.746	0	610	42.068	2.207	0.878	138.308	13195	1.475	0.678	0.931	0.793948
158	IFT88_KAN487-14_6.tif:0002-0139	1.405	216.358	0	1531	63.648	14.171	0.794	303.89	28992	1.718	0.582	0.867	1.74446
159	IFT88_KAN487-14_6.tif:0003-0202	0.786	5.507	0	35	121.658	20.708	0.912	4.329	413	1.345	0.744	0.926	0.0248504
160	IFT88_KAN487-14_6.tif:0004-0295	1.143	161.248	0	918	114.245	30.272	0.688	184.229	17576	2.043	0.49	0.823	1.05755
161	IFT88_KAN487-14_6.tif:0005-0387	0.943	115.889	0	613	83.153	39.636	0.895	109.326	10430	1.466	0.682	0.923	0.627577
162	IFT88_KAN487-14_6.tif:0006-0407	1.09	126.404	0	805	97.499	41.64	0.757	137.795	13146	1.635	0.612	0.87	0.791
163	IFT88_KAN487-14_6.tif:0007-0550	1.247	154.017	0	917	19.118	56.23	0.832	192.112	18328	1.527	0.655	0.915	1.1028
164	IFT88_KAN487-14_6.tif:0008-0606	0.933	167.09	0	696	7.895	62.112	0.927	155.876	14871	1.203	0.831	0.952	0.894793
165	IFT88_KAN487-14_6.tif:0009-0620	0.839	48.138	0	237	49.458	63.477	0.925	40.366	3851	1.458	0.686	0.936	0.231716
166	IFT88_KAN487-14_6.tif:0010-0763	1.069	196.637	0	901	93.295	78.107	0.897	210.235	20057	1.273	0.785	0.907	1.20684
167	IFT88_KAN487-14_6.tif:0011-0868	1.048	129.09	0	892	17.613	88.881	0.853	135.31	12909	1.243	0.805	0.909	0.776739
168	IFT88_KAN487-14_6.tif:0012-0868	1.342	191.297	0	1490	123.214	88.841	0.808	256.659	24486	1.584	0.631	0.877	1.47333
169	IFT88_KAN487-14_6.tif:0013-0873	1.258	137.058	0	866	37.16	89.317	0.839	172.395	16447	1.548	0.646	0.92	0.989622
170	IFT88_KAN487-14_6.tif:0014-0924	1.122	267.533	0	1602	64.822	94.674	0.958	300.054	28626	1.247	0.802	0.918	1.72244
171	IFT88_KAN487-14_6.tif:0015-1021	1.31	106.144	0	648	7.185	104.613	0.841	139.073	13268	1.454	0.688	0.899	0.79834
										17365.5				1.04489
172	IFT88_KAN487-15_1.tif:0001-0136	0.723	341.594	0	1516	61.622	13.941	0.954	247.057	23570	1.235	0.81	0.932	1.41822
173	IFT88_KAN487-15_1.tif:0002-0198	0.912	99.747	0	516	87.922	20.279	0.837	90.962	8678	1.444	0.693	0.911	0.522158
174	IFT88_KAN487-15_1.tif:0003-0221	1.331	205.354	0	1376	129.169	22.657	0.878	273.367	26080	1.491	0.671	0.904	1.56924
175	IFT88_KAN487-15_1.tif:0004-0430	1.006	111.115	0	501	13.072	44.032	0.973	111.81	10667	1.186	0.843	0.923	0.641837
176	IFT88_KAN487-15_1.tif:0005-0567	1.163	266.378	0	1333	76.503	58.129	0.891	309.928	29568	1.434	0.697	0.941	1.77912
177	IFT88_KAN487-15_1.tif:0006-0604	1.53	211.582	0	1637	131.755	61.915	0.835	323.795	30891	1.539	0.65	0.904	1.85872
178	IFT88_KAN487-15_1.tif:0007-0637	1.216	224.319	0	1433	77.299	65.287	0.789	272.748	26021	1.58	0.633	0.885	1.56569
179	IFT88_KAN487-15_1.tif:0008-0699	1.069	128.51	0	563	34.647	71.563	0.987	137.396	13108	1.095	0.914	0.919	0.788713
180	IFT88_KAN487-15_1.tif:0009-0698	0.912	154.034	0	653	58.322	71.51	0.894	140.467	13401	1.476	0.678	0.916	0.806343
181	IFT88_KAN487-15_1.tif:0010-0770	1.09	121.288	0	626	22.14	78.888	0.85	132.218	12614	1.274	0.785	0.878	0.758989
182	IFT88_KAN487-15_1.tif:0011-0857	1.352	223.674	0	1446	100.467	87.8	0.836	302.444	28854	1.661	0.602	0.899	1.73616
183	IFT88_KAN487-15_1.tif:0012-0919	1.184	209.434	0	1283	107.903	94.074	0.908	248.064	23666	1.192	0.839	0.942	1.42399
184	IFT88_KAN487-15_1.tif:0013-1019	1.258	153.708	0	1044	115.738	104.392	0.941	193.338	18445	1.111	0.9	0.923	1.10984
185	IFT88_KAN487-15_1.tif:0014-1029	1.163	373.423	0	1439	140.422	105.413	0.918	434.473	41450	1.539	0.65	0.961	2.49406
186	IFT88_KAN487-15_2.tif:0001-0098	0.954	106.253	0	621	93.388	10.095	0.905	101.349	9669	1.405	0.712	0.929	0.581787
187	IFT88_KAN487-15_2.tif:0002-0215	1.006	220.052	0	1096	1.824	22.092	0.911	221.429	21125	1.518	0.659	0.937	1.2711
188	IFT88_KAN487-15_2.tif:0003-0232	1.017	58.794	0	199	80.193	23.773	0.938	59.778	5703	1.136	0.88	0.907	0.343152
189	IFT88_KAN487-15_2.tif:0004-0247	1.101	240.314	0	1249	59.877	25.336	0.953	264.489	25233	1.082	0.924	0.917	1.51828
190	IFT88_KAN487-15_2.tif:0005-0336	1.373	160.443	0	1199	105.759	34.439	0.777	220.308	21018	1.883	0.531	0.897	1.26466
191	IFT88_KAN487-15_2.tif:0006-0577	0.776	82.027	0	219	80.322	59.119	0.92	63.625	6070	1.34	0.746	0.897	0.365234
192	IFT88_KAN487-15_2.tif:0007-0674	0.975	166.108	0	898	22.261	69.023	0.883	161.924	15448	1.476	0.677	0.903	0.929512
193	IFT88_KAN487-15_2.tif:0008-0673	0.807	151.065	0	491	132.216	68.892	0.903	121.925	11632	1.26	0.794	0.928	0.699902
194	IFT88_KAN487-15_2.tif:0009-0876	1.226	272.821	0	1554	70.997	89.644	0.944	334.581	31920	1.383	0.723	0.921	1.92064
195	IFT88_KAN487-15_2.tif:0010-1000	1.562	222.819	0	1186	108.694	102.429	0.831	347.998	33200	1.242	0.805	0.892	1.99766
196	IFT88_KAN487-15_3.tif:0001-0049	0.86	156.037	0	540	89.727	4.989	0.948	134.115	12795	1.027	0.973	0.927	0.76988
197	IFT88_KAN487-15_3.tif:0002-0056	0.776	152.797	0	529	99.783	5.711	0.934	118.518	11307	1.157	0.865	0.925	0.680346
198	IFT88_KAN487-15_3.tif:0003-0158	1.059	94.406	0	506	117.765	16.166	0.888	99.945	9535	1.364	0.733	0.902	0.573724
199	IFT88_KAN487-15_3.tif:0004-0262	0.975	142.247	0	641	59.026	26.787	0.956	138.665	13229	1.264	0.791	0.939	0.795994
200	IFT88_KAN487-15_3.tif:0005-0275	0.901	154.186	0	552	19.063	28.151	0.843	138.989	13260	1.342	0.745	0.882	0.797859
201	IFT88_KAN487-15_3.tif:0006-0288	0.797	233.632	0	875	2.86	29.523	0.911	186.116	17756	1.333	0.75	0.91	1.06838
202	IFT88_KAN487-15_3.tif:0007-0293	1.09	166.51	0	659	37.846	29.982	0.944	181.514	17317	1.147	0.872	0.924	1.04197
203	IFT88_KAN487-15_3.tif:0008-0412	0.786	274.773	0	1163	49.462	42.188	0.967	216.01	20608	1.241	0.806	0.904	1.23999
204	IFT88_KAN487-15_3.tif:0009-0433	1.143	146.44	0	716	64.226	44.331	0.891	167.311	15962	1.428	0.7	0.916	0.960439
205	IFT88_KAN487-15_3.tif:0010-0514	0.933	152.73	0	694	88.359	52.619	0.927	142.48	13593	1.075	0.93	0.947	0.817896
206	IFT88_KAN487-15_3.tif:0011-0720	0.807	234.636	1	870	104.186	73.724	0.937	189.376	18067	1.288	0.776	0.933	1.0871
207	IFT88_KAN487-15_3.tif:0012-0730	0.818	226.808	0	859	28.417	74.741	0.949	185.435	17691	1.195	0.837	0.94	1.06447
208	IFT88_KAN487-15_3.tif:0013-0778	1.268	267.843	0	1876	135.984	79.715	0.948	339.707	32409	1.325	0.755	0.931	1.95006
209	IFT88_KAN487-15_3.tif:0014-0818	1.059	159.129	0	891	113.877	83.781	0.851	168.464	16072	1.72	0.581	0.906	0.967058
210	IFT88_KAN487-15_3.tif:0015-0828	1.226	185.376	0	1112	49.961	84.712	0.901	227.341	21689	1.235	0.81	0.932	1.30504
211	IFT88_KAN487-15_3.tif:0016-0836	0.933	265.157	0	1472	78.193	85.615	0.927	247.361	23599	1.05	0.952	0.952	1.41996
212	IFT88_KAN487-15_3.tif:0017-0836	0.954	121.659	0	619	12.781	85.637	0.811	116.045	11071	1.608	0.622	0.888	0.666146
213	IFT88_KAN487-15_4.tif:0001-0020	1.205	164.017	0	1009	109.3	2.069	0.952	197.709	18862	1.222	0.819	0.947	1.13493
214	IFT88_KAN487-15_4.tif:0002-0128	1.436	332.883	0	1855	49.215	13.132	0.912	478.025	45605	1.488	0.672	0.913	2.74407
215	IFT88_KAN487-15_4.tif:0003-0167	1.038	171.323	0	1017	101.351	17.12	0.94	177.783	16961	1.214	0.824	0.921	1.02055
216	IFT88_KAN487-15_4.tif:0004-0408	1.992	379.111	0	1919	74.534	41.784	0.715	755.019	72031	2.331	0.429	0.911	4.33413
217	IFT88_KAN487-15_4.tif:0005-0494	1.048	232.17	0	901	92.603	50.602	0.919	243.357	23217	1.205	0.83	0.93	1.39698
218	IFT88_KAN487-15_4.tif:0006-0528	1.53	182.952	0	1395	123.582	54.075	0.921	279.981	26711	1.274	0.785	0.927	1.60721
219	IFT88_KAN487-15_4.tif:0007-0556	1.006	149.76	0	567	5.73	56.939	0.924	150.698	14377	1.168	0.856	0.95	0.865069
220	IFT88_KAN487-15_4.tif:0008-0767	1.321	372.349	0	1807	134.095	78.576	0.932	491.767	46916	1.241	0.806	0.94	2.82295
221	IFT88_KAN487-15_4.tif:0009-0797	1.153	268.018	0	1652	52.412	81.693	0.91	309.026	29482	1.223	0.818	0.936	1.77394
222	IFT88_KAN487-15_4.tif:0010-0803	1.321	189.5	0	1009	110.359	82.237	0.825	250.275	23877	1.625	0.615	0.897	1.43669
223	IFT88_KAN487-15_4.tif:0011-0818	0.975	113.161	0	788	23.768	83.74	0.988	110.311	10524	1.114	0.898	0.939	0.633233
224	IFT88_KAN487-15_4.tif:0012-0965	0.943	168.922	0	595	69.487	98.848	0.925	159.356	15203	1.302	0.768	0.928	0.91477
225	IFT88_KAN487-15_4.tif:0013-0982	1.184	340.947	0	1888	138.803	100.609	0.846	403.835	38527	1.447	0.691	0.934	2.31818
226	IFT88_KAN487-15_5.tif:0001-0100	0.933	187.697	0	989	14.09	10.232	0.946	175.099	16705	1.262	0.792	0.918	1.00515
227	IFT88_KAN487-15_5.tif:0002-0216	1.132	97.611	0	654	88.278	22.043	0.777	110.5	10542	1.527	0.655	0.882	0.634316
228	IFT88_KAN487-15_5.tif:0003-0229	0.776	842.243	17	3863	57.779	23.484	0.985	653.292	62326	1.079	0.927	0.961	3.75018
229	IFT88_KAN487-15_5.tif:0004-0289	1.237	152.958	0	1019	48.302	29.599	0.825	189.187	18049	1.494	0.669	0.925	1.08601
230	IFT88_KAN487-15_5.tif:0005-0349	1.101	273.829	0	1546	134.554	35.754	0.935	301.374	28752	1.323	0.756	0.95	1.73002
231	IFT88_KAN487-15_5.tif:0006-0362	1.174	126.857	0	859	4.369	37.037	0.742	148.926	14208	1.892	0.528	0.911	0.854901
232	IFT88_KAN487-15_5.tif:0007-0731	1.09	154.99	0	918	101.779	74.88	0.944	168.957	16119	1.091	0.916	0.929	0.969886
233	IFT88_KAN487-15_5.tif:0008-0820	0.713	116.338	2	289	25.521	83.963	0.962	82.922	7911	1.506	0.664	0.913	0.476008
234	IFT88_KAN487-15_5.tif:0009-0883	1.384	191.894	0	1476	93.534	90.367	0.855	265.505	25330	1.399	0.715	0.892	1.52412
235	IFT88_KAN487-15_6.tif:0001-0182	0.723	111.87	0	234	14.349	18.637	0.993	80.909	7719	1.265	0.79	0.945	0.464455
236	IFT88_KAN487-15_6.tif:0002-0342	0.922	204.761	0	1039	24.498	35.048	0.949	188.873	18019	1.154	0.867	0.951	1.08421
237	IFT88_KAN487-15_6.tif:0003-0394	0.88	121.321	0	572	83.213	40.38	0.875	106.821	10191	1.07	0.935	0.928	0.613196
238	IFT88_KAN487-15_6.tif:0004-0433	1.174	207.045	0	797	138.821	44.325	0.915	243.064	23189	1.231	0.812	0.922	1.39529
239	IFT88_KAN487-15_6.tif:0005-0550	0.839	219.475	0	1028	49.373	56.276	0.759	184.04	17558	1.689	0.592	0.838	1.05647
240	IFT88_KAN487-15_6.tif:0006-0677	0.996	155.958	0	957	41.98	69.442	0.846	155.299	14816	1.253	0.798	0.9	0.891484
241	IFT88_KAN487-15_6.tif:0007-0707	0.755	172.986	0	507	17.088	72.453	1	130.552	12455	1.184	0.845	0.923	0.749422
242	IFT88_KAN487-15_6.tif:0008-0726	1.069	195.912	0	909	132.338	74.356	0.926	209.459	19983	1.217	0.822	0.911	1.20238
243	IFT88_KAN487-15_6.tif:0009-0898	0.702	64.836	0	191	12.384	92.024	0.927	45.533	4344	1.065	0.939	0.931	0.26138
244	IFT88_KAN487-15_6.tif:0010-0909	1.122	214.178	0	823	133.473	93.15	0.971	240.213	22917	1.159	0.863	0.93	1.37892
										20649.5				1.24249
245	IFT88_KAN487-16_1.tif:0001-0037	0.891	34.141	0	265	20.591	3.839	0.935	30.418	2902	1.425	0.702	0.914	0.174614
246	IFT88_KAN487-16_1.tif:0002-0191	0.964	112.467	0	512	63.569	19.544	0.846	108.456	10347	1.586	0.63	0.911	0.622583
247	IFT88_KAN487-16_1.tif:0003-0240	1.111	152.764	0	927	131.574	24.573	0.904	169.733	16193	1.361	0.735	0.922	0.974339
248	IFT88_KAN487-16_1.tif:0004-0272	1.237	121.432	0	637	36.966	27.865	0.925	150.195	14329	1.54	0.649	0.922	0.862181
249	IFT88_KAN487-16_1.tif:0005-0378	0.964	216	5	840	130.148	38.767	0.885	208.296	19872	1.653	0.605	0.953	1.19571
250	IFT88_KAN487-16_1.tif:0006-0388	1.101	92.105	0	581	93.37	39.761	0.924	101.37	9671	1.388	0.721	0.925	0.581908
251	IFT88_KAN487-16_1.tif:0007-0458	0.723	146.319	0	559	60.901	46.946	0.933	105.825	10096	1.138	0.879	0.979	0.60748
252	IFT88_KAN487-16_1.tif:0008-0560	1.216	166.147	0	1111	111.519	57.403	0.879	202.017	19273	1.58	0.633	0.963	1.15966
253	IFT88_KAN487-16_1.tif:0009-0834	0.891	73.729	0	463	32.752	85.396	0.903	65.69	6267	1.291	0.774	0.904	0.377088
254	IFT88_KAN487-16_1.tif:0010-0909	0.849	39.741	0	86	80.593	93.102	0.95	33.741	3219	1.158	0.864	0.953	0.193688
255	IFT88_KAN487-16_1.tif:0011-0913	0.975	82.914	0	398	9.603	93.542	0.855	80.826	7711	1.541	0.649	0.907	0.463974
256	IFT88_KAN487-16_1.tif:0012-0941	1.258	194.658	0	1013	108.347	96.307	0.774	244.846	23359	1.446	0.691	0.886	1.40552
257	IFT88_KAN487-16_1.tif:0013-0947	0.985	234.819	0	1032	105.017	97.003	0.985	231.366	22073	1.159	0.863	0.917	1.32814
258	IFT88_KAN487-16_1.tif:0014-0992	1.017	154.732	0	800	131.404	101.603	0.909	157.322	15009	1.288	0.776	0.898	0.903097
259	IFT88_KAN487-16_2.tif:0001-0038	1.237	148.949	0	951	89.967	3.923	0.825	184.229	17576	1.557	0.642	0.894	1.05755
260	IFT88_KAN487-16_2.tif:0002-0156	1.111	144.113	0	656	132.075	15.954	0.916	160.121	15276	1.295	0.772	0.955	0.919162
261	IFT88_KAN487-16_2.tif:0003-0182	0.629	391.4	36	1120	4.402	18.633	1	246.156	23484	1	1	0.968	1.41304
262	IFT88_KAN487-16_2.tif:0004-0256	1.289	126.154	0	834	9.283	26.219	0.693	162.647	15517	2.259	0.443	0.851	0.933664
263	IFT88_KAN487-16_2.tif:0005-0278	1.08	70.65	0	431	107.921	28.541	0.852	76.276	7277	1.215	0.823	0.896	0.43786
264	IFT88_KAN487-16_2.tif:0006-0322	1.446	111.754	0	783	40.781	32.962	0.798	161.651	15422	1.444	0.692	0.885	0.927947
265	IFT88_KAN487-16_2.tif:0007-0421	0.87	42.482	0	434	112.296	43.124	0.895	36.959	3526	1.519	0.658	0.938	0.212161
266	IFT88_KAN487-16_2.tif:0008-0488	1.321	134.746	0	814	27.189	50.019	0.835	177.961	16978	1.87	0.535	0.944	1.02157
267	IFT88_KAN487-16_2.tif:0009-0511	0.639	89	3	270	80.407	52.316	0.863	56.906	5429	1.952	0.512	0.878	0.326665
268	IFT88_KAN487-16_2.tif:0010-0691	1.436	204.241	0	1301	74.229	70.724	0.888	293.293	27981	1.523	0.657	0.916	1.68363
269	IFT88_KAN487-16_2.tif:0011-0704	1.111	173.764	0	1066	11.553	72.09	0.893	193.065	18419	1.501	0.666	0.914	1.10828
270	IFT88_KAN487-16_2.tif:0012-0755	1.52	204.055	0	1762	117.08	77.336	0.778	310.137	29588	1.622	0.616	0.873	1.78032
271	IFT88_KAN487-16_2.tif:0013-0791	0.933	326.674	0	1576	41.735	80.948	0.915	304.75	29074	1.168	0.856	0.922	1.74939
272	IFT88_KAN487-16_2.tif:0014-0871	1.195	119.614	0	983	134.288	89.203	0.797	142.931	13636	1.928	0.519	0.898	0.820483
273	IFT88_KAN487-16_2.tif:0015-0950	1.593	184.013	0	1713	86.086	97.197	0.781	293.178	27970	1.399	0.715	0.866	1.68297
274	IFT88_KAN487-16_2.tif:0016-0968	1.436	134.248	0	947	28.049	99.064	0.792	192.782	18392	1.518	0.659	0.87	1.10665
275	IFT88_KAN487-16_2.tif:0017-0988	1.384	109.212	0	799	63.73	101.218	0.898	151.106	14416	1.103	0.906	0.95	0.867416
276	IFT88_KAN487-16_3.tif:0001-0025	1.143	87.349	0	622	100.57	2.562	0.714	99.798	9521	2.192	0.456	0.855	0.572882
277	IFT88_KAN487-16_3.tif:0002-0070	0.88	219.476	0	960	87.934	7.224	0.951	193.244	18436	1.098	0.911	0.966	1.1093
278	IFT88_KAN487-16_3.tif:0003-0207	1.006	109.198	0	613	22.142	21.255	0.819	109.881	10483	1.543	0.648	0.877	0.630766
279	IFT88_KAN487-16_3.tif:0004-0281	1.163	129.748	0	821	133.507	28.825	0.907	150.96	14402	1.314	0.761	0.925	0.866574
280	IFT88_KAN487-16_3.tif:0005-0378	0.86	171.427	0	888	47.914	38.719	0.884	147.343	14057	1.295	0.772	0.911	0.845815
281	IFT88_KAN487-16_3.tif:0006-0383	1.583	165.404	0	1256	117.749	39.286	0.723	261.795	24976	1.606	0.623	0.841	1.50282
282	IFT88_KAN487-16_3.tif:0007-0548	1.446	149.42	0	917	97.775	56.022	0.751	216.136	20620	1.792	0.558	0.863	1.24071
283	IFT88_KAN487-16_3.tif:0008-0590	1.583	185.046	0	1102	138.933	60.45	0.851	292.884	27942	1.374	0.728	0.893	1.68128
284	IFT88_KAN487-16_3.tif:0009-0685	1.101	116.362	0	505	58.711	70.161	0.953	128.067	12218	1.069	0.935	0.921	0.735162
285	IFT88_KAN487-16_3.tif:0010-0702	1.247	97.815	0	479	43.53	71.826	0.856	122.009	11640	1.266	0.79	0.902	0.700383
286	IFT88_KAN487-16_3.tif:0011-0741	1.635	151	0	1190	141.305	75.957	0.765	246.911	23556	1.71	0.585	0.876	1.41737
287	IFT88_KAN487-16_3.tif:0012-0841	1.562	125.611	0	955	82.071	86.232	0.792	196.178	18716	1.94	0.516	0.898	1.12615
288	IFT88_KAN487-16_3.tif:0013-0897	1.541	214.136	0	1280	140.29	91.853	0.77	329.948	31478	2.037	0.491	0.925	1.89404
289	IFT88_KAN487-16_3.tif:0014-0998	1.08	305.835	0	1511	81.914	102.165	0.978	330.189	31501	1.238	0.807	0.945	1.89543
290	IFT88_KAN487-16_4.tif:0001-0053	1.048	144.56	0	908	135.565	5.463	0.827	151.526	14456	1.544	0.647	0.897	0.869823
291	IFT88_KAN487-16_4.tif:0002-0182	0.954	135.088	0	723	25.252	18.59	0.71	128.853	12293	1.851	0.54	0.863	0.739674
292	IFT88_KAN487-16_4.tif:0003-0235	1.268	127.273	0	846	89.003	24.146	0.805	161.421	15400	1.786	0.56	0.864	0.926624
293	IFT88_KAN487-16_4.tif:0004-0319	1.101	165.276	0	822	119.085	32.672	0.833	181.902	17354	1.516	0.66	0.886	1.0442
294	IFT88_KAN487-16_4.tif:0005-0378	0.996	183.232	0	934	59.121	38.716	0.944	182.458	17407	1.359	0.736	0.95	1.04739
295	IFT88_KAN487-16_4.tif:0006-0614	1.069	231.696	0	1198	91.3	62.931	0.95	247.718	23633	1.109	0.902	0.967	1.42201
296	IFT88_KAN487-16_4.tif:0007-0669	0.922	146.875	0	655	2.2	68.518	0.935	135.478	12925	1.353	0.739	0.946	0.777702
297	IFT88_KAN487-16_4.tif:0008-0725	0.629	52.2	0	213	42.954	74.32	0.914	32.829	3132	1.196	0.836	0.938	0.188454
298	IFT88_KAN487-16_4.tif:0009-0768	1.352	120.558	0	933	131.96	78.621	0.868	163.014	15552	1.367	0.731	0.915	0.93577
299	IFT88_KAN487-16_4.tif:0010-0809	1.006	100.104	0	460	108.87	82.851	0.899	100.731	9610	1.607	0.622	0.91	0.578237
300	IFT88_KAN487-16_4.tif:0011-0909	1.247	143.571	0	904	67.91	93.05	0.832	179.083	17085	1.453	0.688	0.898	1.02801
301	IFT88_KAN487-16_5.tif:0001-0197	1.352	150.132	0	901	38.451	20.208	0.845	203.002	19367	1.424	0.702	0.896	1.16532
302	IFT88_KAN487-16_5.tif:0002-0198	0.891	133.012	0	489	129.345	20.312	0.873	118.508	11306	1.558	0.642	0.914	0.680286
303	IFT88_KAN487-16_5.tif:0003-0219	1.279	177.41	0	1099	108.278	22.447	0.877	226.869	21644	1.355	0.738	0.904	1.30233
304	IFT88_KAN487-16_5.tif:0004-0260	1.289	116.683	0	873	57.486	26.614	0.828	150.436	14352	1.238	0.808	0.872	0.863565
305	IFT88_KAN487-16_5.tif:0005-0274	1.258	109.708	0	698	8.435	28.052	0.914	137.994	13165	1.25	0.8	0.906	0.792143
306	IFT88_KAN487-16_5.tif:0006-0480	1.426	147.537	0	1094	127.659	49.051	0.836	210.319	20065	1.483	0.674	0.916	1.20732
307	IFT88_KAN487-16_5.tif:0007-0543	1.216	165.388	0	1005	67.613	55.537	0.883	201.094	19185	1.339	0.747	0.91	1.15437
308	IFT88_KAN487-16_5.tif:0008-0559	0.776	59.027	0	376	24.567	57.26	0.934	45.785	4368	1.159	0.863	0.931	0.262824
309	IFT88_KAN487-16_5.tif:0009-0643	0.933	254.775	0	1195	3.441	65.872	0.818	237.676	22675	1.513	0.661	0.886	1.36436
310	IFT88_KAN487-16_5.tif:0010-0660	1.279	158.287	0	948	54.883	67.656	0.877	202.415	19311	1.544	0.648	0.931	1.16195
311	IFT88_KAN487-16_5.tif:0011-0743	1.059	110.485	0	570	105.602	76.032	0.917	116.967	11159	1.343	0.745	0.914	0.671441
312	IFT88_KAN487-16_5.tif:0012-0935	1.216	199.517	0	1050	116.501	95.76	0.894	242.592	23144	1.179	0.848	0.913	1.39258
313	IFT88_KAN487-16_5.tif:0013-0943	1.384	122.038	0	817	76.857	96.475	0.865	168.852	16109	1.353	0.739	0.923	0.969284
314	IFT88_KAN487-16_5.tif:0014-0981	1.247	120.487	0	918	24.725	100.468	0.88	150.289	14338	1.412	0.708	0.915	0.862723
315	IFT88_KAN487-16_6.tif:0001-0056	0.901	118.628	0	484	92.95	5.748	0.96	106.936	10202	1.108	0.902	0.94	0.613858
316	IFT88_KAN487-16_6.tif:0002-0055	1.153	191.782	0	1054	132.356	5.692	0.883	221.125	21096	1.519	0.658	0.952	1.26935
317	IFT88_KAN487-16_6.tif:0003-0465	1.006	92.26	0	270	137.101	47.673	0.941	92.838	8857	1.205	0.83	0.937	0.532929
318	IFT88_KAN487-16_6.tif:0004-0535	1.258	225.983	0	1211	64.931	54.81	0.863	284.247	27118	1.454	0.688	0.93	1.6317
319	IFT88_KAN487-16_6.tif:0005-0623	1.415	193.378	0	1032	108.203	63.848	0.78	273.639	26106	1.502	0.666	0.882	1.57081
320	IFT88_KAN487-16_6.tif:0006-0817	1.111	205.038	0	1028	24.385	83.623	0.877	227.813	21734	1.46	0.685	0.93	1.30774
321	IFT88_KAN487-16_6.tif:0007-0821	1.237	126.78	0	763	66.684	84.009	0.863	156.809	14960	1.642	0.609	0.911	0.900149
322	IFT88_KAN487-16_6.tif:0008-0869	1.038	237.505	0	847	130.436	88.961	0.871	246.46	23513	1.193	0.838	0.904	1.41479
323	IFT88_KAN487-16_6.tif:0009-0905	1.394	158.414	0	1057	2.009	92.67	0.826	220.842	21069	1.575	0.635	0.917	1.26773
324	IFT88_KAN487-16_6.tif:0010-0959	0.66	43.413	0	184	112.002	98.205	1	28.668	2735	1.092	0.916	0.947	0.164566
325	IFT88_KAN487-16_6.tif:0011-0970	1.048	210.01	0	1223	98.251	99.372	0.949	220.13	21001	1.126	0.888	0.93	1.26364
										16509.3				0.993371
326	IFT88_KAN487-17_1.tif:0001-0043	1.174	105.241	0	715	8.557	4.484	0.754	123.55	11787	1.91	0.523	0.868	0.709228
327	IFT88_KAN487-17_1.tif:0002-0160	1.132	129.056	0	813	78.922	16.342	0.755	146.096	13938	1.633	0.612	0.857	0.838655
328	IFT88_KAN487-17_1.tif:0003-0298	1.09	169.827	0	721	117.163	30.553	0.915	185.131	17662	1.486	0.673	0.916	1.06273
329	IFT88_KAN487-17_1.tif:0004-0357	1.143	118.367	0	691	72.804	36.516	0.84	135.237	12902	1.454	0.688	0.908	0.776318
330	IFT88_KAN487-17_1.tif:0005-0453	1.048	118.38	0	666	18.27	46.478	0.853	124.084	11838	1.416	0.706	0.913	0.712297
331	IFT88_KAN487-17_1.tif:0006-0463	1.017	220.567	0	1022	138.739	47.463	0.921	224.259	21395	1.158	0.863	0.933	1.28734
332	IFT88_KAN487-17_1.tif:0007-0537	0.87	168.108	0	630	56.314	54.948	0.926	146.253	13953	1.118	0.894	0.927	0.839557
333	IFT88_KAN487-17_1.tif:0008-0549	1.205	167.661	0	1225	139.07	56.152	0.827	202.101	19281	1.549	0.645	0.898	1.16014
334	IFT88_KAN487-17_1.tif:0009-0621	1.478	127.858	0	845	99.324	63.474	0.815	188.967	18028	1.395	0.717	0.895	1.08475
335	IFT88_KAN487-17_1.tif:0010-0689	1.226	143.35	0	608	129.617	70.558	0.917	175.802	16772	1.365	0.733	0.918	1.00918
336	IFT88_KAN487-17_1.tif:0011-0747	0.975	108.516	0	507	52.187	76.507	0.883	105.783	10092	1.413	0.708	0.912	0.607239
337	IFT88_KAN487-17_1.tif:0012-0777	1.059	114.218	0	581	92.594	79.606	0.917	120.919	11536	1.145	0.874	0.898	0.694125
338	IFT88_KAN487-17_1.tif:0013-0811	1.268	145.091	0	960	37.793	83.064	0.846	184.02	17556	1.2	0.833	0.896	1.05635
339	IFT88_KAN487-17_1.tif:0014-0890	0.723	142.188	0	677	15.825	91.115	0.871	102.838	9811	1.193	0.839	0.879	0.590331
340	IFT88_KAN487-17_1.tif:0015-0901	1.541	137.313	0	857	109.719	92.217	0.82	211.576	20185	1.417	0.706	0.894	1.21454
341	IFT88_KAN487-17_1.tif:0016-0922	1.247	148.681	0	573	138.114	94.47	0.823	185.456	17693	1.467	0.681	0.872	1.06459
342	IFT88_KAN487-17_2.tif:0001-0168	1.132	133.88	0	703	134.655	17.21	0.894	151.557	14459	1.336	0.748	0.923	0.870003
343	IFT88_KAN487-17_2.tif:0002-0212	1.289	163.813	0	1144	120.685	21.728	0.885	211.199	20149	1.449	0.69	0.928	1.21237
344	IFT88_KAN487-17_2.tif:0003-0265	1.132	120.065	0	857	1.318	27.128	0.832	135.918	12967	1.303	0.767	0.889	0.780229
345	IFT88_KAN487-17_2.tif:0004-0267	1.289	119.309	0	728	33.437	27.365	0.952	153.821	14675	1.158	0.863	0.914	0.883
346	IFT88_KAN487-17_2.tif:0005-0361	1.373	100.588	0	755	98.028	36.958	0.827	138.119	13177	1.566	0.638	0.891	0.792865
347	IFT88_KAN487-17_2.tif:0006-0482	0.86	121.305	0	602	80.555	49.374	0.789	104.263	9947	1.669	0.599	0.896	0.598515
348	IFT88_KAN487-17_2.tif:0007-0528	1.268	152.025	0	1013	21.682	54.025	0.87	192.814	18395	1.443	0.693	0.917	1.10683
349	IFT88_KAN487-17_2.tif:0008-0635	1.101	251.476	0	1600	125.201	65.056	0.924	276.773	26405	1.374	0.728	0.933	1.5888
350	IFT88_KAN487-17_2.tif:0009-0650	1.195	162.807	0	924	103.795	66.533	0.878	194.543	18560	1.348	0.742	0.923	1.11676
351	IFT88_KAN487-17_2.tif:0010-0865	1.111	172.443	0	934	78.269	88.546	0.877	191.598	18279	1.351	0.74	0.922	1.09985
352	IFT88_KAN487-17_2.tif:0011-0992	1.195	159.395	0	933	121.579	101.588	0.916	190.466	18171	1.137	0.879	0.938	1.09336
353	IFT88_KAN487-17_3.tif:0001-0096	0.87	62.096	0	481	47.16	9.851	0.913	54.024	5154	1.482	0.675	0.897	0.310118
354	IFT88_KAN487-17_3.tif:0002-0168	1.143	129.872	0	694	11.247	17.162	0.84	148.381	14156	1.362	0.734	0.905	0.851772
355	IFT88_KAN487-17_3.tif:0003-0360	0.954	179.253	0	783	113.361	36.904	0.892	170.98	16312	1.47	0.68	0.915	0.981499
356	IFT88_KAN487-17_3.tif:0004-0475	1.017	136.784	0	435	118.603	48.635	0.997	139.073	13268	1.123	0.891	0.951	0.79834
357	IFT88_KAN487-17_3.tif:0005-0504	0.901	169.5	0	1018	55.083	51.637	0.927	152.794	14577	1.069	0.935	0.94	0.877103
358	IFT88_KAN487-17_3.tif:0006-0568	0.891	119.506	0	510	10.584	58.141	0.935	106.475	10158	1.194	0.838	0.909	0.611211
359	IFT88_KAN487-17_3.tif:0007-0724	1.08	170.097	0	943	61.634	74.083	0.918	183.642	17520	1.269	0.788	0.945	1.05418
360	IFT88_KAN487-17_3.tif:0008-0856	1.268	244.95	0	1368	129.78	87.592	0.921	310.672	29639	1.403	0.713	0.931	1.78339
361	IFT88_KAN487-17_3.tif:0009-0949	1.017	191.443	0	941	96.534	97.23	0.964	194.648	18570	1.189	0.841	0.956	1.11736
362	IFT88_KAN487-17_4.tif:0001-0009	1.216	175.922	0	1126	67.856	0.967	0.868	213.903	20407	1.392	0.719	0.921	1.2279
363	IFT88_KAN487-17_4.tif:0002-0101	1.08	168.485	0	983	87.207	10.302	0.852	181.902	17354	1.665	0.601	0.916	1.0442
364	IFT88_KAN487-17_4.tif:0003-0190	1.017	129.155	0	682	94.385	19.427	0.864	131.317	12528	1.343	0.745	0.924	0.753814
365	IFT88_KAN487-17_4.tif:0004-0358	0.964	167.783	0	1039	36.584	36.745	0.902	161.798	15436	1.07	0.935	0.898	0.92879
366	IFT88_KAN487-17_4.tif:0005-0369	0.65	160.742	0	658	76.723	37.812	0.944	104.462	9966	1.137	0.88	0.947	0.599658
367	IFT88_KAN487-17_4.tif:0006-0417	1.048	119.46	0	524	1.652	42.745	0.919	125.216	11946	1.436	0.696	0.948	0.718795
368	IFT88_KAN487-17_4.tif:0007-0700	0.954	187.297	0	885	107.323	71.641	0.905	178.653	17044	1.225	0.816	0.929	1.02554
369	IFT88_KAN487-17_4.tif:0008-0720	0.912	211.908	0	811	50.9	73.777	0.938	193.244	18436	1.174	0.852	0.951	1.1093
370	IFT88_KAN487-17_4.tif:0009-0734	1.184	260.319	0	1421	2.329	75.158	0.871	308.334	29416	1.518	0.659	0.922	1.76997
371	IFT88_KAN487-17_4.tif:0010-0852	1.006	169.25	0	765	64.864	87.301	0.883	170.309	16248	1.187	0.842	0.897	0.977648
372	IFT88_KAN487-17_4.tif:0011-0932	0.88	190.786	0	745	32.444	95.481	0.893	167.982	16026	1.16	0.862	0.918	0.96429
373	IFT88_KAN487-17_4.tif:0012-1033	0.807	137.026	0	706	17.459	105.734	0.872	110.594	10551	1.303	0.767	0.933	0.634858
374	IFT88_KAN487-17_5.tif:0001-0062	0.943	148.556	0	566	113.32	6.346	0.97	140.142	13370	1.042	0.959	0.957	0.804478
375	IFT88_KAN487-17_5.tif:0002-0113	1.059	154.802	0	720	51.287	11.598	0.811	163.884	15635	1.842	0.543	0.898	0.940764
376	IFT88_KAN487-17_5.tif:0003-0216	0.786	179.747	0	562	8.859	22.084	0.88	141.306	13481	1.428	0.7	0.926	0.811157
377	IFT88_KAN487-17_5.tif:0004-0356	0.713	96.941	0	356	115.132	36.488	0.941	69.096	6592	1.201	0.832	0.932	0.396643
378	IFT88_KAN487-17_5.tif:0005-0376	0.755	49.833	0	358	97.113	38.434	0.876	37.609	3588	1.222	0.819	0.923	0.215891
379	IFT88_KAN487-17_5.tif:0006-0437	0.87	124.952	0	482	49.801	44.748	0.853	108.707	10371	1.636	0.611	0.897	0.624027
380	IFT88_KAN487-17_5.tif:0007-0504	1.321	178.079	0	983	80.908	51.615	0.871	235.192	22438	1.479	0.676	0.91	1.3501
381	IFT88_KAN487-17_5.tif:0008-0522	0.734	138.014	0	565	0.641	53.463	0.897	101.265	9661	1.568	0.638	0.972	0.581306
382	IFT88_KAN487-17_5.tif:0009-0607	1.101	198.676	0	1207	99.418	62.202	0.953	218.662	20861	1.079	0.927	0.925	1.25521
383	IFT88_KAN487-17_5.tif:0010-0799	1.363	158.338	0	1060	119.969	81.846	0.899	215.759	20584	1.101	0.908	0.915	1.23855
384	IFT88_KAN487-17_5.tif:0011-0821	1.027	97.082	0	472	6.174	83.956	0.764	99.724	9514	1.526	0.655	0.903	0.572461
385	IFT88_KAN487-17_5.tif:0012-0845	1.08	99.99	0	519	42.121	86.487	0.935	107.953	10299	1.361	0.735	0.924	0.619695
386	IFT88_KAN487-17_5.tif:0013-0898	0.66	123	0	436	55.129	91.934	0.943	81.224	7749	1.291	0.775	0.913	0.46626
387	IFT88_KAN487-17_5.tif:0014-0982	1.31	188.936	0	1142	88.058	100.483	0.864	247.55	23617	1.203	0.831	0.887	1.42104
388	IFT88_KAN487-17_6.tif:0001-0081	0.807	122.662	0	440	92.538	8.319	0.89	99.001	9445	1.601	0.624	0.928	0.568309
389	IFT88_KAN487-17_6.tif:0002-0115	0.797	106.789	0	342	80.975	11.817	0.996	85.071	8116	1.216	0.822	0.933	0.488343
390	IFT88_KAN487-17_6.tif:0003-0221	0.681	179.877	0	581	53.166	22.636	0.935	122.554	11692	1.133	0.883	0.903	0.703512
391	IFT88_KAN487-17_6.tif:0004-0238	0.681	166.985	0	724	68.396	24.397	0.914	113.77	10854	1.195	0.837	0.949	0.653089
392	IFT88_KAN487-17_6.tif:0005-0299	0.671	199	0	700	62.95	30.612	0.885	133.497	12736	1.554	0.644	0.914	0.76633
393	IFT88_KAN487-17_6.tif:0006-0309	1.163	279.162	0	1363	132.774	31.681	0.891	324.801	30987	1.429	0.7	0.941	1.8645
394	IFT88_KAN487-17_6.tif:0007-0429	0.954	58.363	0	356	107.967	44.038	0.922	55.669	5311	1.133	0.882	0.91	0.319565
395	IFT88_KAN487-17_6.tif:0008-0515	0.818	180.038	5	679	49.785	52.695	0.883	147.197	14043	1.477	0.677	0.94	0.844972
396	IFT88_KAN487-17_6.tif:0009-0573	0.901	74.57	0	260	21.702	58.68	0.901	67.22	6413	1.401	0.714	0.905	0.385873
397	IFT88_KAN487-17_6.tif:0010-0591	0.943	104.7	0	528	113.114	60.54	0.938	98.771	9423	1.222	0.818	0.968	0.566985
398	IFT88_KAN487-17_6.tif:0011-0616	0.943	164.656	8	447	95.651	63.079	0.943	155.331	14819	1.303	0.767	0.914	0.891665
399	IFT88_KAN487-17_6.tif:0012-0764	0.996	149.263	0	779	57.817	78.211	0.873	148.633	14180	1.6	0.625	0.927	0.853216
400	IFT88_KAN487-17_6.tif:0013-0873	0.849	159.025	0	604	51.234	89.417	0.904	135.017	12881	1.35	0.741	0.91	0.775054
401	IFT88_KAN487-17_6.tif:0014-0934	0.744	53.493	0	142	2.941	95.636	0.896	39.81	3798	1.35	0.741	0.916	0.228527
402	IFT88_KAN487-17_6.tif:0015-0951	0.88	67.774	0	308	43.67	97.356	0.893	59.673	5693	1.478	0.677	0.913	0.34255
403	IFT88_KAN487-17_6.tif:0016-0966	1.122	169.43	0	1056	134.504	99.013	0.849	190.026	18129	1.264	0.791	0.895	1.09083
										14623.1				0.87988
404	IFT88_KAN487-18_1.tif:0001-0120	0.975	106.452	0	633	73.359	12.333	0.912	103.77	9900	1.1	0.909	0.899	0.595687
405	IFT88_KAN487-18_1.tif:0002-0126	0.87	192.94	0	950	16.527	12.938	0.959	167.856	16014	1.259	0.794	0.938	0.963568
406	IFT88_KAN487-18_1.tif:0003-0203	1.342	161.578	0	973	111.866	20.751	0.875	216.786	20682	1.696	0.59	0.921	1.24444
407	IFT88_KAN487-18_1.tif:0004-0221	1.216	239.362	0	1383	42.26	22.579	0.92	291.039	27766	1.384	0.723	0.935	1.67069
408	IFT88_KAN487-18_1.tif:0005-0434	1.226	234.838	0	1564	116.325	44.43	0.901	288	27476	1.456	0.687	0.932	1.65324
409	IFT88_KAN487-18_1.tif:0006-0448	0.818	96.795	0	375	79.406	45.88	0.984	79.138	7550	1.073	0.932	0.94	0.454286
410	IFT88_KAN487-18_1.tif:0007-0551	1.069	243.51	0	1147	30.224	56.481	0.909	260.348	24838	1.062	0.941	0.927	1.49451
411	IFT88_KAN487-18_1.tif:0008-0692	1.195	104	0	742	28.49	70.93	0.834	124.273	11856	1.125	0.889	0.857	0.71338
412	IFT88_KAN487-18_1.tif:0009-0715	1.174	203.429	0	1229	80.955	73.184	0.853	238.819	22784	1.59	0.629	0.892	1.37092
413	IFT88_KAN487-18_1.tif:0010-0805	0.88	227.31	0	885	117.243	82.439	0.924	200.141	19094	1.167	0.857	0.903	1.14889
414	IFT88_KAN487-18_1.tif:0011-0930	1.027	170.847	0	928	16.376	95.201	0.836	175.498	16743	1.446	0.692	0.887	1.00743
415	IFT88_KAN487-18_1.tif:0012-1012	0.839	116.025	0	505	138.804	103.663	0.893	97.293	9282	1.193	0.838	0.92	0.558501
416	IFT88_KAN487-18_2.tif:0001-0020	0.786	220.8	0	1013	29.213	2.129	0.961	173.58	16560	1.102	0.907	0.968	0.996421
417	IFT88_KAN487-18_2.tif:0002-0088	1.258	170.417	0	1058	133.71	9.021	0.914	214.354	20450	1.39	0.719	0.92	1.23048
418	IFT88_KAN487-18_2.tif:0003-0213	0.975	166.946	0	800	104.431	21.851	0.912	162.741	15526	1.293	0.773	0.907	0.934205
419	IFT88_KAN487-18_2.tif:0004-0382	0.723	187.594	1	687	45.339	39.104	0.884	135.677	12944	1.277	0.783	0.932	0.778845
420	IFT88_KAN487-18_2.tif:0005-0471	1.017	132.186	0	671	68.006	48.274	0.951	134.398	12822	1.118	0.894	0.915	0.771504
421	IFT88_KAN487-18_2.tif:0006-0505	0.839	95.075	0	405	78.218	51.752	0.893	79.725	7606	1.263	0.791	0.93	0.457656
422	IFT88_KAN487-18_2.tif:0007-0509	1.027	140.959	0	818	48.565	52.18	0.93	144.796	13814	1.246	0.803	0.916	0.831193
423	IFT88_KAN487-18_2.tif:0008-0600	1.258	235.783	0	1317	121.177	61.417	0.941	296.574	28294	1.191	0.839	0.906	1.70246
424	IFT88_KAN487-18_2.tif:0009-0652	1.226	204.487	0	1186	24.565	66.722	0.901	250.778	23925	1.141	0.877	0.921	1.43958
425	IFT88_KAN487-18_2.tif:0010-0776	0.891	100.118	0	298	88.067	79.424	0.949	89.201	8510	1.037	0.964	0.934	0.51205
426	IFT88_KAN487-18_2.tif:0011-0812	0.765	93.534	0	387	139.522	83.201	0.956	71.57	6828	1.379	0.725	0.936	0.410843
427	IFT88_KAN487-18_2.tif:0012-0820	1.216	203.233	0	1344	111.962	83.999	0.92	247.11	23575	1.318	0.758	0.924	1.41852
428	IFT88_KAN487-18_2.tif:0013-0997	1.247	185.328	0	1224	12.075	102.01	0.906	231.167	22054	1.255	0.797	0.912	1.327
429	IFT88_KAN487-18_3.tif:0001-0103	1.027	156.724	0	666	99.69	10.49	0.918	160.991	15359	1.042	0.96	0.899	0.924157
430	IFT88_KAN487-18_3.tif:0002-0160	1.069	143.706	0	704	17.476	16.45	0.844	153.643	14658	1.437	0.696	0.899	0.881977
431	IFT88_KAN487-18_3.tif:0003-0166	1.247	319.403	0	1980	50.525	17.056	0.933	398.405	38009	1.174	0.852	0.915	2.28702
432	IFT88_KAN487-18_3.tif:0004-0272	1.111	72.972	0	601	85.697	27.913	0.775	81.077	7735	1.81	0.553	0.838	0.465418
433	IFT88_KAN487-18_3.tif:0005-0412	1.027	168.163	0	958	50.335	42.234	0.961	172.741	16480	1.145	0.874	0.929	0.991608
434	IFT88_KAN487-18_3.tif:0006-0422	1.604	145.02	0	820	25.385	43.227	0.845	232.571	22188	1.555	0.643	0.895	1.33506
435	IFT88_KAN487-18_3.tif:0007-0535	0.891	258.141	0	974	108.718	54.8	0.949	229.993	21942	1.215	0.823	0.944	1.32026
436	IFT88_KAN487-18_3.tif:0008-0581	0.807	124.481	0	478	21.337	59.499	0.937	100.469	9585	1.347	0.742	0.945	0.576733
437	IFT88_KAN487-18_3.tif:0009-0664	0.954	69.692	0	330	67.825	68.05	0.837	66.476	6342	1.742	0.574	0.905	0.3816
438	IFT88_KAN487-18_3.tif:0010-0696	1.153	120.027	0	704	100.522	71.302	0.967	138.392	13203	1.124	0.89	0.94	0.794429
439	IFT88_KAN487-18_3.tif:0011-0717	0.996	253.589	0	1252	130.975	73.434	0.914	252.518	24091	1.359	0.736	0.945	1.44956
440	IFT88_KAN487-18_3.tif:0012-0904	1.163	211.189	0	949	118.777	92.613	0.964	245.716	23442	1.223	0.818	0.917	1.41051
441	IFT88_KAN487-18_3.tif:0013-0952	0.839	160.625	0	676	49.464	97.491	0.959	134.692	12850	1.189	0.841	0.914	0.773189
442	IFT88_KAN487-18_3.tif:0014-0979	1.132	120.833	0	648	22.761	100.233	0.894	136.788	13050	1.345	0.743	0.927	0.785223
443	IFT88_KAN487-18_4.tif:0001-0022	0.66	129.825	9	488	64.008	2.263	0.943	85.731	8179	1.326	0.754	0.913	0.492133
444	IFT88_KAN487-18_4.tif:0002-0042	0.671	146.922	0	378	49.845	4.265	0.838	98.561	9403	1.645	0.608	0.895	0.565782
445	IFT88_KAN487-18_4.tif:0003-0055	1.006	222.948	0	750	39.086	5.649	0.911	224.343	21403	1.428	0.7	0.932	1.28783
446	IFT88_KAN487-18_4.tif:0004-0190	0.734	156.329	0	630	97.442	19.441	0.781	114.703	10943	1.612	0.62	0.848	0.658444
447	IFT88_KAN487-18_4.tif:0005-0241	1.027	204.439	0	1005	141.165	24.691	0.993	210.004	20035	1.212	0.825	0.929	1.20551
448	IFT88_KAN487-18_4.tif:0006-0242	1.153	153.582	0	678	13.732	24.821	0.938	177.081	16894	1.291	0.775	0.948	1.01652
449	IFT88_KAN487-18_4.tif:0007-0392	1.059	82.851	0	547	93.042	40.21	0.888	87.712	8368	1.406	0.711	0.918	0.503506
450	IFT88_KAN487-18_4.tif:0008-0399	1.027	119.296	0	531	46.248	40.812	0.889	122.543	11691	1.609	0.621	0.912	0.703452
451	IFT88_KAN487-18_4.tif:0009-0475	1.122	160.43	0	914	18.3	48.683	0.913	179.932	17166	1.622	0.616	0.951	1.03288
452	IFT88_KAN487-18_4.tif:0010-0531	0.839	70.263	0	536	9.286	54.401	0.925	58.919	5621	1.239	0.807	0.914	0.338218
453	IFT88_KAN487-18_4.tif:0011-0609	1.226	172.504	0	761	81.995	62.416	0.891	211.555	20183	1.604	0.623	0.921	1.21442
454	IFT88_KAN487-18_4.tif:0012-0635	1.394	208.098	0	1405	137.5	65.126	0.875	290.106	27677	1.381	0.724	0.899	1.66534
455	IFT88_KAN487-18_4.tif:0013-0754	1.289	212.447	0	1361	69.66	77.245	0.86	273.901	26131	1.325	0.755	0.911	1.57231
456	IFT88_KAN487-18_4.tif:0014-0838	1.163	173.279	0	1123	35.516	85.732	0.918	201.608	19234	1.198	0.835	0.945	1.15732
457	IFT88_KAN487-18_4.tif:0015-0933	1.132	188.759	0	886	63.254	95.502	0.894	213.683	20386	1.144	0.874	0.915	1.22663
458	IFT88_KAN487-18_4.tif:0016-0943	1.006	256.719	0	1100	119.019	96.571	0.911	258.325	24645	1.117	0.896	0.919	1.4829
459	IFT88_KAN487-18_5.tif:0001-0088	0.818	71.41	0	286	15.595	9.083	0.949	58.384	5570	1.075	0.93	0.951	0.335149
460	IFT88_KAN487-18_5.tif:0002-0162	1.101	202.59	0	1184	133.111	16.558	0.984	222.97	21272	1.077	0.929	0.933	1.27994
461	IFT88_KAN487-18_5.tif:0003-0194	1.31	219.408	0	1402	46.571	19.889	0.925	287.475	27426	1.277	0.783	0.933	1.65023
462	IFT88_KAN487-18_5.tif:0004-0233	0.681	108.938	0	346	93.731	23.89	0.899	74.222	7081	1.197	0.835	0.909	0.426066
463	IFT88_KAN487-18_5.tif:0005-0252	1.048	302.46	0	1588	40.221	25.796	0.891	317.034	30246	1.137	0.879	0.922	1.81991
464	IFT88_KAN487-18_5.tif:0006-0421	0.933	121.011	0	596	41.329	43.134	1	112.89	10770	1.123	0.89	0.937	0.648035
465	IFT88_KAN487-18_5.tif:0007-0426	1.205	202.948	0	1306	18.547	43.73	0.837	244.636	23339	1.672	0.598	0.947	1.40432
466	IFT88_KAN487-18_5.tif:0008-0481	1.488	275.43	0	962	140.12	49.229	0.821	409.956	39111	1.767	0.566	0.913	2.35332
467	IFT88_KAN487-18_5.tif:0009-0489	0.943	172.378	0	612	74.274	50.097	0.907	162.616	15514	1.27	0.787	0.952	0.933483
468	IFT88_KAN487-18_5.tif:0010-0545	0.996	149.863	0	805	115.555	55.838	0.944	149.23	14237	1.356	0.738	0.955	0.856645
469	IFT88_KAN487-18_5.tif:0011-0571	0.849	119.506	0	530	8.656	58.535	0.904	101.464	9680	1.274	0.785	0.92	0.582449
470	IFT88_KAN487-18_5.tif:0012-0609	1.122	208.673	0	820	31.935	62.4	0.971	234.039	22328	1.257	0.796	0.934	1.34348
471	IFT88_KAN487-18_5.tif:0013-0612	1.394	265.722	0	1149	117.408	62.597	0.761	370.439	35341	1.669	0.599	0.853	2.12648
472	IFT88_KAN487-18_5.tif:0014-0622	0.964	139.054	0	580	7.779	63.713	0.945	134.094	12793	1.153	0.867	0.929	0.769759
473	IFT88_KAN487-18_5.tif:0015-0719	1.415	243.037	0	1181	66.907	73.593	0.898	343.91	32810	1.439	0.695	0.915	1.97419
474	IFT88_KAN487-18_5.tif:0016-0753	1.101	257.724	0	1517	86.981	77.164	0.819	283.65	27061	1.593	0.628	0.925	1.62827
475	IFT88_KAN487-18_5.tif:0017-0962	0.87	176.94	0	526	60.442	98.487	0.913	153.937	14686	1.108	0.903	0.892	0.883662
476	IFT88_KAN487-18_5.tif:0018-1029	1.08	163.728	0	616	38.533	105.399	0.918	176.766	16864	1.297	0.771	0.945	1.01471
477	IFT88_KAN487-18_6.tif:0001-0036	0.975	242.258	0	1127	107.416	3.723	0.912	236.156	22530	1.191	0.84	0.912	1.35564
478	IFT88_KAN487-18_6.tif:0002-0079	0.922	85.273	0	572	25.252	8.145	0.922	78.656	7504	1.444	0.693	0.903	0.451518
479	IFT88_KAN487-18_6.tif:0003-0125	1.006	143.969	0	737	87.824	12.795	0.911	144.87	13821	1.222	0.819	0.919	0.831615
480	IFT88_KAN487-18_6.tif:0004-0177	1.3	183.944	0	944	50	18.177	0.892	239.081	22809	1.419	0.705	0.919	1.37243
481	IFT88_KAN487-18_6.tif:0005-0283	1.331	280.835	0	1670	128.738	29.02	0.81	373.846	35666	1.75	0.571	0.91	2.14604
482	IFT88_KAN487-18_6.tif:0006-0307	1.017	152.196	0	792	74.539	31.439	0.864	154.744	14763	1.236	0.809	0.907	0.888295
483	IFT88_KAN487-18_6.tif:0007-0408	1.216	137.603	0	857	68.053	41.864	0.92	167.311	15962	1.264	0.791	0.928	0.960439
484	IFT88_KAN487-18_6.tif:0008-0444	1.048	144.01	0	460	115.66	45.474	0.919	150.949	14401	1.449	0.69	0.952	0.866513
485	IFT88_KAN487-18_6.tif:0009-0477	1.069	144.657	0	799	100.899	48.868	0.926	154.66	14755	1.343	0.745	0.923	0.887814
486	IFT88_KAN487-18_6.tif:0010-0545	0.734	45.043	0	138	35.876	55.833	0.968	33.049	3153	1.196	0.836	0.946	0.189717
487	IFT88_KAN487-18_6.tif:0011-0645	1.163	145.009	0	987	141.378	66.067	0.918	168.716	16096	1.275	0.784	0.941	0.968502
488	IFT88_KAN487-18_6.tif:0012-0678	0.629	80.1	6	171	19.473	69.435	0.993	50.376	4806	1.15	0.869	0.923	0.289179
489	IFT88_KAN487-18_6.tif:0013-0729	1.017	191.258	0	987	103.757	74.693	0.951	194.459	18552	1.073	0.932	0.915	1.11628
490	IFT88_KAN487-18_6.tif:0014-0731	1.143	293.927	0	1311	84.52	74.83	0.93	335.818	32038	1.294	0.773	0.928	1.92774
491	IFT88_KAN487-18_6.tif:0015-0838	0.86	57.354	0	194	67.425	85.844	1	49.296	4703	1.192	0.839	0.937	0.282981
492	IFT88_KAN487-18_6.tif:0016-0878	1.027	206.184	0	686	40.952	89.898	0.961	211.796	20206	1.17	0.855	0.929	1.2158
493	IFT88_KAN487-18_6.tif:0017-0905	1.006	154.333	0	807	19.886	92.614	0.794	155.299	14816	1.608	0.622	0.881	0.891484
494	IFT88_KAN487-18_6.tif:0018-1032	0.922	169.92	0	1031	94.537	105.737	0.917	156.735	14953	1.238	0.808	0.951	0.899727
										17488.5				1.05229

## Sheet: IF condition
Exp. number	Cell line	Gene induced	Culture condition, fixation condition	rabbit-Alexa488	mouse IgG1-Alexa568	mouse IgG2b-Alexa647	Nuclear stain	Date	Replicate
Replicate 1
KAN487-1	RPE-BFP-Cas9 pMCB306 (pool)	Serum starved for 24 hours	Fixed in 4% PFA at RT for 15 minutes.	IFT88, Proteintech, 13967-1-AP, 1:1000	CEP170, Invitrogen, 41-3200, 1:1000	Ac-Tub, 6B-11, SIGMA, 1:2000	DAPI	2019-05-13	No.2
KAN487-2	RPE-BFP-Cas9 CEP89KO (pool)	Serum starved for 24 hours	Fixed in 4% PFA at RT for 15 minutes.	IFT88, Proteintech, 13967-1-AP, 1:1000	CEP170, Invitrogen, 41-3200, 1:1000	Ac-Tub, 6B-11, SIGMA, 1:2000	DAPI	2019-05-13	No.2
KAN487-3	RPE-BFP-Cas9 NCS1KO (pool)	Serum starved for 24 hours	Fixed in 4% PFA at RT for 15 minutes.	IFT88, Proteintech, 13967-1-AP, 1:1000	CEP170, Invitrogen, 41-3200, 1:1000	Ac-Tub, 6B-11, SIGMA, 1:2000	DAPI	2019-05-13	No.2
KAN487-4	RPE-BFP-Cas9 C3orf14KO (pool)	Serum starved for 24 hours	Fixed in 4% PFA at RT for 15 minutes.	IFT88, Proteintech, 13967-1-AP, 1:1000	CEP170, Invitrogen, 41-3200, 1:1000	Ac-Tub, 6B-11, SIGMA, 1:2000	DAPI	2019-05-13	No.2
KAN487-5	RPE-BFP-Cas9 Rab34KO (pool)	Serum starved for 24 hours	Fixed in 4% PFA at RT for 15 minutes.	IFT88, Proteintech, 13967-1-AP, 1:1000	CEP170, Invitrogen, 41-3200, 1:1000	Ac-Tub, 6B-11, SIGMA, 1:2000	DAPI	2019-05-13	No.2
KAN487-6	RPE-BFP-Cas9 Myo5AKO (pool)	Serum starved for 24 hours	Fixed in 4% PFA at RT for 15 minutes.	IFT88, Proteintech, 13967-1-AP, 1:1000	CEP170, Invitrogen, 41-3200, 1:1000	Ac-Tub, 6B-11, SIGMA, 1:2000	DAPI	2019-05-13	No.2
Replicate 2
KAN487-7	RPE-BFP-Cas9 pMCB306 (pool)	Serum starved for 24 hours	Fixed in 4% PFA at RT for 15 minutes.	IFT88, Proteintech, 13967-1-AP, 1:1000	CEP170, Invitrogen, 41-3200, 1:1000	Ac-Tub, 6B-11, SIGMA, 1:2000	DAPI	2019-05-13	No.3
KAN487-8	RPE-BFP-Cas9 CEP89KO (pool)	Serum starved for 24 hours	Fixed in 4% PFA at RT for 15 minutes.	IFT88, Proteintech, 13967-1-AP, 1:1000	CEP170, Invitrogen, 41-3200, 1:1000	Ac-Tub, 6B-11, SIGMA, 1:2000	DAPI	2019-05-13	No.3
KAN487-9	RPE-BFP-Cas9 NCS1KO (pool)	Serum starved for 24 hours	Fixed in 4% PFA at RT for 15 minutes.	IFT88, Proteintech, 13967-1-AP, 1:1000	CEP170, Invitrogen, 41-3200, 1:1000	Ac-Tub, 6B-11, SIGMA, 1:2000	DAPI	2019-05-13	No.3
KAN487-10	RPE-BFP-Cas9 C3orf14KO (pool)	Serum starved for 24 hours	Fixed in 4% PFA at RT for 15 minutes.	IFT88, Proteintech, 13967-1-AP, 1:1000	CEP170, Invitrogen, 41-3200, 1:1000	Ac-Tub, 6B-11, SIGMA, 1:2000	DAPI	2019-05-13	No.3
KAN487-11	RPE-BFP-Cas9 Rab34KO (pool)	Serum starved for 24 hours	Fixed in 4% PFA at RT for 15 minutes.	IFT88, Proteintech, 13967-1-AP, 1:1000	CEP170, Invitrogen, 41-3200, 1:1000	Ac-Tub, 6B-11, SIGMA, 1:2000	DAPI	2019-05-13	No.3
KAN487-12	RPE-BFP-Cas9 Myo5AKO (pool)	Serum starved for 24 hours	Fixed in 4% PFA at RT for 15 minutes.	IFT88, Proteintech, 13967-1-AP, 1:1000	CEP170, Invitrogen, 41-3200, 1:1000	Ac-Tub, 6B-11, SIGMA, 1:2000	DAPI	2019-05-13	No.3
Replicate 3
KAN487-13	RPE-BFP-Cas9 pMCB306 (pool)	Serum starved for 24 hours	Fixed in 4% PFA at RT for 15 minutes.	IFT88, Proteintech, 13967-1-AP, 1:1000	CEP170, Invitrogen, 41-3200, 1:1000	Ac-Tub, 6B-11, SIGMA, 1:2000	DAPI	2019-05-13	No.4
KAN487-14	RPE-BFP-Cas9 CEP89KO (pool)	Serum starved for 24 hours	Fixed in 4% PFA at RT for 15 minutes.	IFT88, Proteintech, 13967-1-AP, 1:1000	CEP170, Invitrogen, 41-3200, 1:1000	Ac-Tub, 6B-11, SIGMA, 1:2000	DAPI	2019-05-13	No.4
KAN487-15	RPE-BFP-Cas9 NCS1KO (pool)	Serum starved for 24 hours	Fixed in 4% PFA at RT for 15 minutes.	IFT88, Proteintech, 13967-1-AP, 1:1000	CEP170, Invitrogen, 41-3200, 1:1000	Ac-Tub, 6B-11, SIGMA, 1:2000	DAPI	2019-05-13	No.4
KAN487-16	RPE-BFP-Cas9 C3orf14KO (pool)	Serum starved for 24 hours	Fixed in 4% PFA at RT for 15 minutes.	IFT88, Proteintech, 13967-1-AP, 1:1000	CEP170, Invitrogen, 41-3200, 1:1000	Ac-Tub, 6B-11, SIGMA, 1:2000	DAPI	2019-05-13	No.4
KAN487-17	RPE-BFP-Cas9 Rab34KO (pool)	Serum starved for 24 hours	Fixed in 4% PFA at RT for 15 minutes.	IFT88, Proteintech, 13967-1-AP, 1:1000	CEP170, Invitrogen, 41-3200, 1:1000	Ac-Tub, 6B-11, SIGMA, 1:2000	DAPI	2019-05-13	No.4
KAN487-18	RPE-BFP-Cas9 Myo5AKO (pool)	Serum starved for 24 hours	Fixed in 4% PFA at RT for 15 minutes.	IFT88, Proteintech, 13967-1-AP, 1:1000	CEP170, Invitrogen, 41-3200, 1:1000	Ac-Tub, 6B-11, SIGMA, 1:2000	DAPI	2019-05-13	No.4

## Sheet: Statistics
Table Analyzed	Identify outliers of Data 1:Cleaned data						Compare column means (main column effect)
Data sets analyzed	A-D
							Number of families	1
Nested one-way ANOVA							Number of comparisons per family	3
P value	0.2957						Alpha	0.05
P value summary	ns
Significantly different (P < 0.05)?	No						Dunnett's multiple comparisons test	Mean Diff.	95.00% CI of diff.	Below threshold?	Summary	Adjusted P Value
F, DFn, Dfd	1.464, 3, 8						sgGFP vs. CEP89 KO	0.05974	-0.1333 to 0.2527	No	ns	0.7075
							sgGFP vs. NCS1 KO	-0.07127	-0.2645 to 0.1220	No	ns	0.6007
Random effects	SD	Variance					sgGFP vs. C3ORF14 KO	-0.03957	-0.2332 to 0.1541	No	ns	0.8813
Variation within subcolumns	0.4951	0.2451
Variation among subcolumn means	0.0561	0.003147					Test details	Mean 1	Mean 2	Mean Diff.	SE of diff.	N1	N2	q	DF
							sgGFP vs. CEP89 KO	0.9847	0.925	0.05974	0.06727	193	221	0.8881	8
Do the subcolumns differ (within each column)?							sgGFP vs. NCS1 KO	0.9847	1.056	-0.07127	0.06736	193	219	1.058	8
Chi-square, df	1.910, 1						sgGFP vs. C3ORF14 KO	0.9847	1.024	-0.03957	0.0675	193	215	0.5863	8
P value	0.167
P value summary	ns
Is there significant difference between subcolumns (P < 0.05)?	No
Data analyzed
Number of treatments (columns)	4
Number of subjects (subcolumns)	12
Total number of values	848
