# Supplementary material for: Myristoylated Neuronal Calcium Sensor-1 captures the preciliary vesicle at distal appendages
Source: eLife. 2025 Jan 30;14:e85998. doi: 10.7554/eLife.85998 (PMC11984960; doi:10.7554/eLife.85998)
Supplement: Figure 3—source data 7. [file elife-85998-fig3-data7.xlsx]

## Sheet: Replicate1
	Label	Area	Mean	Min	Max	X	Y	Circ	IntDen	RawIntDen	AR	Round	Solidity						Label	Area	Mean	Min	Max	X	Y	Circ	IntDen	RawIntDen	AR	Round	Solidity
1	CEP19_KAN497-13_1.tif:0001-0098	0.66	219.968	8	754	5.432	10.039	0.937	145.258	13858	1.039	0.963	0.992	0.830134
2	CEP19_KAN497-13_1.tif:0002-0146	1.101	290.038	0	953	87.386	14.935	0.948	319.215	30454	1.122	0.892	0.981	1.82428
3	CEP19_KAN497-13_1.tif:0003-0190	0.587	263.375	0	898	140.979	19.504	0.92	154.597	14749	1.143	0.875	1	0.883508
4	CEP19_KAN497-13_1.tif:0004-0215	0.818	245.59	0	926	113.782	22.068	0.963	200.79	19156	1.026	0.975	0.981	1.1475
5	CEP19_KAN497-13_1.tif:0005-0293	0.514	223.163	14	495	51.242	30.049	0.935	114.619	10935	1	1	1	0.655038
6	CEP19_KAN497-13_1.tif:0006-0441	0.912	274.931	0	1135	117.324	45.215	0.951	250.716	23919	1.121	0.892	0.983	1.43282
7	CEP19_KAN497-13_1.tif:0007-0619	0.514	192.98	0	943	103.251	63.425	0.935	99.116	9456	1	1	1	0.566442
8	CEP19_KAN497-13_1.tif:0008-0629	0.891	283.694	0	1162	98.546	64.392	0.929	252.76	24114	1.15	0.87	0.971	1.4445
9	CEP19_KAN497-13_1.tif:0009-0714	0.66	215.317	0	617	71.456	73.094	0.937	142.186	13565	1.039	0.963	0.992	0.812583
10	CEP19_KAN497-13_1.tif:0010-0815	1.111	311.858	0	1364	127.617	83.432	0.927	346.499	33057	1.115	0.897	0.981	1.98021
11	CEP19_KAN497-13_1.tif:0011-0861	0.514	218.429	30	579	41.311	88.201	0.935	112.187	10703	1	1	1	0.641141
12	CEP19_KAN497-13_1.tif:0012-0916	0.839	331.288	0	1246	106.01	93.827	0.919	277.801	26503	1.031	0.97	0.994	1.58761
13	CEP19_KAN497-13_1.tif:0013-1027	0.587	248.304	0	738	62.708	105.145	0.92	145.75	13905	1.143	0.875	1	0.83295
14	CEP19_KAN497-13_2.tif:0001-0114	0.356	232.324	0	958	142.011	11.702	0.803	82.796	7899	2.264	0.442	0.971	0.473173
15	CEP19_KAN497-13_2.tif:0002-0227	0.755	287.694	0	985	68.288	23.292	0.903	217.121	20714	1.125	0.889	1	1.24083
16	CEP19_KAN497-13_2.tif:0003-0360	0.891	267.235	0	1242	117.845	36.913	0.962	238.095	22715	1.119	0.894	0.971	1.36069
17	CEP19_KAN497-13_2.tif:0004-0446	0.514	248	0	727	52.368	45.713	0.935	127.376	12152	1	1	1	0.72794
18	CEP19_KAN497-13_2.tif:0005-0448	0.514	202.041	6	501	2.406	45.918	0.935	103.77	9900	1	1	1	0.593039
19	CEP19_KAN497-13_2.tif:0006-0643	0.514	236.918	27	563	42.335	65.882	0.935	121.684	11609	1	1	1	0.695413
20	CEP19_KAN497-13_2.tif:0007-0650	0.912	302.77	0	1145	125.873	66.553	0.951	276.103	26341	1.114	0.897	0.983	1.5779
21	CEP19_KAN497-13_2.tif:0008-0793	0.514	174.408	11	561	50.423	81.239	0.935	89.578	8546	1	1	1	0.51193
22	CEP19_KAN497-13_2.tif:0009-0803	0.587	225.643	0	595	105.196	82.212	0.92	132.449	12636	1.143	0.875	1	0.756933
23	CEP19_KAN497-13_3.tif:0001-0006	0.566	225.944	0	759	133.287	0.656	0.926	127.889	12201	1.152	0.868	0.982	0.730875
24	CEP19_KAN497-13_3.tif:0002-0072	0.755	305.944	0	1353	49.194	7.371	0.903	230.894	22028	1.125	0.889	1	1.31954
25	CEP19_KAN497-13_3.tif:0003-0120	0.66	203.238	9	734	66.542	12.291	0.937	134.21	12804	1.039	0.963	0.992	0.766997
26	CEP19_KAN497-13_3.tif:0004-0263	0.514	222.796	30	556	98.337	26.977	0.935	114.43	10917	1	1	1	0.65396
27	CEP19_KAN497-13_3.tif:0005-0748	0.262	58.92	0	223	89.43	76.632	1	15.44	1473	1	1	1	0.088237
28	CEP19_KAN497-13_3.tif:0006-0773	0.86	266.89	0	1328	118.196	79.152	0.962	229.395	21885	1.19	0.841	0.965	1.31097
29	CEP19_KAN497-13_3.tif:0007-1030	0.514	205.184	6	570	85.539	105.504	0.935	105.385	10054	1	1	1	0.602264
30	CEP19_KAN497-13_4.tif:0001-0019	0.734	240.286	0	890	63.568	1.996	0.947	176.305	16820	1.125	0.889	0.986	1.00757
31	CEP19_KAN497-13_4.tif:0002-0033	0.65	196.194	0	843	57.743	3.379	0.96	127.501	12164	1.081	0.925	0.984	0.728659
32	CEP19_KAN497-13_4.tif:0003-0159	0.755	202.361	0	836	17.046	16.279	0.903	152.721	14570	1.125	0.889	1	0.872785
33	CEP19_KAN497-13_4.tif:0004-0181	0.514	182.898	2	894	67.93	18.582	0.935	93.938	8962	1	1	1	0.53685
34	CEP19_KAN497-13_4.tif:0005-0210	0.933	382.753	0	1740	89.281	21.547	0.909	357.065	34065	1.115	0.897	0.994	2.04059
35	CEP19_KAN497-13_4.tif:0006-0224	0.912	363.851	0	1672	110.105	22.929	0.889	331.803	31655	1.375	0.727	0.994	1.89623
36	CEP19_KAN497-13_4.tif:0007-0278	0.514	255.673	0	866	114.104	28.513	0.935	131.317	12528	1	1	1	0.750463
37	CEP19_KAN497-13_4.tif:0008-0285	0.514	252.204	0	732	37.318	29.23	0.935	129.535	12358	1	1	1	0.74028
38	CEP19_KAN497-13_4.tif:0009-0290	1.122	160.645	0	737	123.429	29.734	0.834	180.173	17189	1.634	0.612	0.922	1.02967
39	CEP19_KAN497-13_4.tif:0010-0304	0.985	273.085	0	1218	47.923	31.133	0.979	269.069	25670	1.046	0.956	0.974	1.53771
40	CEP19_KAN497-13_4.tif:0011-0451	0.723	239.101	0	896	80.989	46.229	0.933	172.93	16498	1.172	0.853	0.979	0.988278
41	CEP19_KAN497-13_4.tif:0012-0598	0.985	279.989	0	1116	82.613	61.233	0.979	275.872	26319	1.046	0.956	0.974	1.57658
42	CEP19_KAN497-13_4.tif:0013-0663	0.786	198.24	0	667	2.406	67.93	0.961	155.844	14868	1.19	0.84	0.974	0.890636
43	CEP19_KAN497-13_4.tif:0014-0768	0.514	136.939	0	736	87.485	78.68	0.935	70.333	6710	1	1	1	0.401948
44	CEP19_KAN497-13_4.tif:0015-0853	1.006	249.583	0	1390	97.377	87.28	0.815	251.145	23960	1.427	0.701	0.941	1.43527
45	CEP19_KAN497-13_4.tif:0016-0900	1.153	248.345	0	1470	126.089	92.183	0.691	286.343	27318	1.596	0.627	0.833	1.63643
46	CEP19_KAN497-13_4.tif:0017-0934	0.807	223.065	0	1004	64.291	95.619	0.917	180.036	17176	1.277	0.783	0.981	1.02889
47	CEP19_KAN497-13_4.tif:0018-0951	0.828	242.456	0	949	102.739	97.415	0.941	200.77	19154	1.064	0.94	0.988	1.14738
48	CEP19_KAN497-13_4.tif:0019-0996	0.901	250.372	0	1053	26.405	102.005	0.94	225.695	21532	1.123	0.891	0.983	1.28983
49	CEP19_KAN497-13_5.tif:0001-0004	0.22	103.524	3	489	36.806	0.461	0.846	22.788	2174	2.333	0.429	1	0.130229
50	CEP19_KAN497-13_5.tif:0002-0073	0.514	232.816	0	631	124.035	7.525	0.935	119.577	11408	1	1	1	0.683372
51	CEP19_KAN497-13_5.tif:0003-0089	0.587	194.375	0	483	47.812	9.163	0.92	114.095	10885	1.143	0.875	1	0.652043
52	CEP19_KAN497-13_5.tif:0004-0203	0.88	244.714	0	951	70.293	20.783	0.951	215.465	20556	1.163	0.86	0.971	1.23136
53	CEP19_KAN497-13_5.tif:0005-0250	0.514	232.49	0	1123	33.735	25.646	0.935	119.409	11392	1	1	1	0.682414
54	CEP19_KAN497-13_5.tif:0006-0387	0.65	270.29	0	868	128.693	39.621	0.96	175.655	16758	1.081	0.925	0.984	1.00385
55	CEP19_KAN497-13_5.tif:0007-0458	0.514	204.163	0	636	16.432	46.942	0.935	104.861	10004	1	1	1	0.599268
56	CEP19_KAN497-13_5.tif:0008-0508	0.807	268.584	10	1030	107.495	52.014	0.917	216.775	20681	1.277	0.783	0.981	1.23885
57	CEP19_KAN497-13_5.tif:0009-0643	0.734	236.214	0	925	86.512	65.882	0.947	173.318	16535	1.146	0.873	0.986	0.990494
58	CEP19_KAN497-13_5.tif:0010-0765	0.514	193.857	18	541	66.394	78.373	0.935	99.567	9499	1	1	1	0.569018
59	CEP19_KAN497-13_5.tif:0011-0828	1.405	288.224	0	1295	128.127	84.829	0.864	404.83	38622	1.32	0.758	0.937	2.31357
60	CEP19_KAN497-13_5.tif:0012-0902	0.744	258.986	0	1036	19.305	92.343	0.924	192.74	18388	1.13	0.885	0.993	1.10149
61	CEP19_KAN497-13_6.tif:0001-0026	0.514	192.633	0	506	83.389	2.713	0.935	98.938	9439	1	1	1	0.565423
62	CEP19_KAN497-13_6.tif:0002-0063	1.31	222.408	0	1148	86.041	6.412	0.86	291.406	27801	1.481	0.675	0.951	1.66536
63	CEP19_KAN497-13_6.tif:0003-0266	0.587	218.446	0	710	117.277	27.233	0.92	128.225	12233	1.143	0.875	1	0.732792
64	CEP19_KAN497-13_6.tif:0004-0377	0.87	266.108	15	930	79.956	38.644	0.94	231.513	22087	1.237	0.809	0.971	1.32308
65	CEP19_KAN497-13_6.tif:0005-0577	0.514	186.408	0	821	12.439	59.125	0.935	95.741	9134	1	1	1	0.547153
66	CEP19_KAN497-13_6.tif:0006-0703	0.587	232.357	8	789	125.826	72.025	0.92	136.39	13012	1.143	0.875	1	0.779456
67	CEP19_KAN497-13_6.tif:0007-0765	0.514	206.224	0	1007	11.62	78.373	0.935	105.919	10105	1	1	1	0.605319
										16693.7				1
68	CEP19_KAN497-14_1.tif:0001-0076	0.734	223.057	0	763	10.023	7.822	0.911	163.664	15614	1.149	0.87	0.986	0.935324
69	CEP19_KAN497-14_1.tif:0002-0379	0.734	248.743	0	862	74.789	38.802	0.947	182.51	17412	1.146	0.873	0.986	1.04303
70	CEP19_KAN497-14_1.tif:0003-0599	0.587	205.089	7	580	37.523	61.326	0.92	120.384	11485	1.143	0.875	1	0.687985
71	CEP19_KAN497-14_1.tif:0004-0605	0.786	208.547	0	842	11.006	61.992	0.961	163.947	15641	1.19	0.84	0.974	0.936941
72	CEP19_KAN497-14_1.tif:0005-0633	0.66	252.349	8	965	80.932	64.858	0.9	166.641	15898	1.286	0.778	1	0.952336
73	CEP19_KAN497-14_1.tif:0006-0755	0.587	202.482	0	717	122.755	77.349	0.92	118.854	11339	1.143	0.875	1	0.679239
74	CEP19_KAN497-14_1.tif:0007-0874	0.818	226.179	0	727	42.349	89.537	0.929	184.921	17642	1.026	0.975	0.981	1.05681
75	CEP19_KAN497-14_1.tif:0008-0929	0.744	308.859	0	1261	99.202	95.169	0.924	229.857	21929	1.13	0.885	0.993	1.31361
76	CEP19_KAN497-14_1.tif:0009-1026	0.66	208.794	0	785	37.477	105.037	0.937	137.878	13154	1.039	0.963	0.992	0.787963
77	CEP19_KAN497-14_2.tif:0001-0068	0.734	235.657	15	705	5.733	7.013	0.947	172.909	16496	1.146	0.873	0.986	0.988158
78	CEP19_KAN497-14_2.tif:0002-0078	0.744	279.127	0	1017	75.295	7.991	0.924	207.729	19818	1.13	0.885	0.993	1.18716
79	CEP19_KAN497-14_2.tif:0003-0086	0.828	275.81	0	1050	123.727	8.856	0.941	228.389	21789	1.064	0.94	0.988	1.30522
80	CEP19_KAN497-14_2.tif:0004-0307	0.807	223.26	0	943	2.257	31.417	0.917	180.194	17191	1.259	0.794	0.981	1.02979
81	CEP19_KAN497-14_2.tif:0005-0319	0.514	230.02	30	626	103.456	32.711	0.935	118.141	11271	1	1	1	0.675165
82	CEP19_KAN497-14_2.tif:0006-0445	0.744	203.042	0	667	73.31	45.605	0.924	151.106	14416	1.13	0.885	0.993	0.86356
83	CEP19_KAN497-14_2.tif:0007-0542	0.514	217.245	2	541	35.065	55.542	0.935	111.579	10645	1	1	1	0.637666
84	CEP19_KAN497-14_2.tif:0008-0747	0.65	217.726	8	698	109.65	76.479	0.96	141.495	13499	1.081	0.925	0.984	0.808629
85	CEP19_KAN497-14_2.tif:0009-0821	0.66	215.873	0	645	22.837	84.06	0.937	142.553	13600	1.039	0.963	0.992	0.814679
86	CEP19_KAN497-14_2.tif:0010-0893	0.818	254.526	3	1133	120.707	91.426	0.929	208.096	19853	1.259	0.794	0.987	1.18925
87	CEP19_KAN497-14_3.tif:0001-0232	0.901	206.093	0	567	119.427	23.752	0.974	185.78	17724	1.11	0.901	0.977	1.06172
88	CEP19_KAN497-14_3.tif:0002-0264	0.807	241	0	1028	27.843	27.015	0.917	194.512	18557	1.259	0.794	0.981	1.11162
89	CEP19_KAN497-14_3.tif:0003-0415	0.514	196.327	0	438	94.242	42.539	0.935	100.835	9620	1	1	1	0.576266
90	CEP19_KAN497-14_3.tif:0004-0642	0.514	179.469	4	529	31.482	65.78	0.935	92.177	8794	1	1	1	0.526786
91	CEP19_KAN497-14_3.tif:0005-0808	0.671	211.625	0	634	98.183	82.724	0.914	141.966	13544	1	1	1	0.811325
92	CEP19_KAN497-14_3.tif:0006-0850	0.66	224.667	0	763	73.97	87.075	0.9	148.36	14154	1.286	0.778	1	0.847865
93	CEP19_KAN497-14_4.tif:0001-0186	0.818	212	0	702	55.946	19.099	0.963	173.328	16536	1.032	0.969	0.981	0.990554
94	CEP19_KAN497-14_4.tif:0002-0529	0.587	247.25	15	732	53.289	54.16	0.92	145.132	13846	1.143	0.875	1	0.829415
95	CEP19_KAN497-14_4.tif:0003-0623	0.587	216.143	0	656	94.037	63.783	0.92	126.872	12104	1.143	0.875	1	0.725065
96	CEP19_KAN497-14_4.tif:0004-0698	0.839	304.65	0	1183	111.39	71.462	0.887	255.464	24372	1.25	0.8	1	1.45995
97	CEP19_KAN497-14_4.tif:0005-0831	0.66	197.365	0	687	17.194	85.073	0.937	130.331	12434	1.039	0.963	0.992	0.744832
98	CEP19_KAN497-14_4.tif:0006-0842	1.195	291.202	0	1041	51.711	86.212	0.955	347.966	33197	1.201	0.833	0.979	1.9886
99	CEP19_KAN497-14_4.tif:0007-0848	1.289	421.78	0	1738	54.857	86.853	0.959	543.788	51879	1.125	0.889	0.976	3.1077
100	CEP19_KAN497-14_4.tif:0008-0985	0.671	236.547	0	912	42.693	100.845	0.914	158.685	15139	1	1	1	0.90687
101	CEP19_KAN497-14_4.tif:0009-1003	0.734	219.671	0	756	95.829	102.739	0.947	161.18	15377	1.146	0.873	0.986	0.921127
102	CEP19_KAN497-14_5.tif:0001-0211	1.73	243.03	0	1397	106.27	21.592	0.664	420.323	40100	2.602	0.384	0.935	2.40211
103	CEP19_KAN497-14_5.tif:0002-0259	0.985	306.351	0	1687	36.299	26.555	0.917	301.846	28797	1.235	0.81	0.974	1.72502
104	CEP19_KAN497-14_5.tif:0003-0259	0.514	247.429	11	729	74.892	26.568	0.935	127.082	12124	1	1	1	0.726263
105	CEP19_KAN497-14_5.tif:0004-0403	0.514	232.061	28	790	103.763	41.311	0.935	119.189	11371	1	1	1	0.681156
106	CEP19_KAN497-14_5.tif:0005-0536	0.514	184.061	0	740	104.685	54.927	0.935	94.536	9019	1	1	1	0.540264
107	CEP19_KAN497-14_5.tif:0006-0586	0.514	233.245	0	789	100.896	60.046	0.935	119.797	11429	1	1	1	0.68463
108	CEP19_KAN497-14_5.tif:0007-0608	0.514	248.918	0	756	14.487	62.299	0.935	127.847	12197	1	1	1	0.730635
109	CEP19_KAN497-14_5.tif:0008-0794	0.273	158.308	0	596	142.058	81.326	0.736	43.143	4116	2.952	0.339	0.981	0.24656
110	CEP19_KAN497-14_5.tif:0009-0803	0.744	284.761	0	1121	82.678	82.217	0.924	211.922	20218	1.13	0.885	0.993	1.21112
111	CEP19_KAN497-14_5.tif:0010-0866	0.797	272.895	0	1040	107.352	88.717	0.939	217.394	20740	1.155	0.866	0.974	1.24239
112	CEP19_KAN497-14_6.tif:0001-0256	0.65	237.032	8	842	100.129	26.21	0.96	154.041	14696	1.081	0.925	0.984	0.880333
113	CEP19_KAN497-14_6.tif:0002-0287	0.514	193.612	0	577	31.687	29.435	0.935	99.441	9487	1	1	1	0.568299
114	CEP19_KAN497-14_6.tif:0003-0375	1.006	275.562	0	1036	124.905	38.393	0.967	277.287	26454	1	1	0.98	1.58467
115	CEP19_KAN497-14_6.tif:0004-0497	0.66	192.127	4	488	43.518	50.878	0.937	126.872	12104	1.039	0.963	0.992	0.725065
116	CEP19_KAN497-14_6.tif:0005-0575	0.818	195.474	0	677	64.556	58.935	0.929	159.817	15247	1.026	0.975	0.981	0.913339
117	CEP19_KAN497-14_6.tif:0006-0600	0.587	208.821	0	742	15.204	61.429	0.92	122.575	11694	1.143	0.875	1	0.700504
118	CEP19_KAN497-14_6.tif:0007-0674	0.514	197.796	0	655	136.73	69.056	0.935	101.59	9692	1	1	1	0.580579
119	CEP19_KAN497-14_6.tif:0008-0793	0.912	288.621	0	1123	84.766	81.226	0.919	263.199	25110	1.107	0.903	0.983	1.50416
120	CEP19_KAN497-14_6.tif:0009-0871	0.723	211.565	0	750	35.828	89.221	0.933	153.014	14598	1.172	0.853	0.979	0.874462
										16701.2				1.00045
121	CEP19_KAN497-15_1.tif:0001-0033	0.818	243.808	0	783	117.124	3.379	0.929	199.334	19017	1.259	0.794	0.987	1.13917
122	CEP19_KAN497-15_1.tif:0002-0105	1.258	250.7	0	1646	89.618	10.738	0.898	315.336	30084	1.459	0.685	0.934	1.80212
123	CEP19_KAN497-15_1.tif:0003-0134	0.797	183.513	0	660	130.285	13.699	0.861	146.19	13947	1.287	0.777	0.916	0.835466
124	CEP19_KAN497-15_1.tif:0004-0222	0.65	270.452	2	723	20.169	22.729	0.96	175.76	16768	1.081	0.925	0.984	1.00445
125	CEP19_KAN497-15_1.tif:0005-0355	0.734	196.214	4	569	52.204	36.396	0.947	143.968	13735	1.125	0.889	0.986	0.822766
126	CEP19_KAN497-15_1.tif:0006-0483	0.65	275.5	0	963	103.405	49.45	0.96	179.041	17081	1.081	0.925	0.984	1.0232
127	CEP19_KAN497-15_1.tif:0007-0721	0.65	210.145	0	596	76.683	73.817	0.96	136.568	13029	1.081	0.925	0.984	0.780475
128	CEP19_KAN497-15_1.tif:0008-0723	0.514	216.061	0	716	27.899	74.073	0.935	110.971	10587	1	1	1	0.634192
129	CEP19_KAN497-15_1.tif:0009-0944	0.985	214.074	0	649	23.556	96.656	0.979	210.926	20123	1.046	0.956	0.974	1.20543
130	CEP19_KAN497-15_2.tif:0001-0092	0.985	250.053	0	841	131.671	9.428	0.979	246.376	23505	1.046	0.956	0.974	1.40802
131	CEP19_KAN497-15_2.tif:0002-0093	0.514	224.143	41	599	1.587	9.573	0.935	115.122	10983	1	1	1	0.657913
132	CEP19_KAN497-15_2.tif:0003-0110	0.262	165.36	65	241	97.415	11.313	1	43.332	4134	1	1	1	0.247639
133	CEP19_KAN497-15_2.tif:0004-0146	1.101	344.61	0	1502	112.837	15.001	0.919	379.276	36184	1.131	0.884	0.977	2.16753
134	CEP19_KAN497-15_2.tif:0005-0210	0.912	294.494	0	1076	119.432	21.505	0.951	268.556	25621	1.114	0.897	0.983	1.53477
135	CEP19_KAN497-15_2.tif:0006-0216	0.901	363.43	0	2215	26.014	22.157	0.94	327.611	31255	1.16	0.862	0.983	1.87226
136	CEP19_KAN497-15_2.tif:0007-0464	1.006	298.073	0	1022	62.248	47.505	0.967	299.938	28615	1	1	0.98	1.71412
137	CEP19_KAN497-15_2.tif:0008-0642	0.88	245.214	0	838	132.541	65.729	0.951	215.905	20598	1.163	0.86	0.971	1.23388
138	CEP19_KAN497-15_2.tif:0009-0785	0.367	8.486	0	37	139.187	80.42	0.938	3.113	297	1.4	0.714	1	0.0177912
139	CEP19_KAN497-15_2.tif:0010-0791	0.377	4.722	0	22	140.057	80.983	0.965	1.782	170	1	1	1	0.0101835
140	CEP19_KAN497-15_2.tif:0011-0805	0.891	209.8	0	669	25.344	82.412	0.962	186.923	17833	1.119	0.894	0.971	1.06825
141	CEP19_KAN497-15_2.tif:0012-0897	0.514	222.551	14	639	52.982	91.887	0.935	114.305	10905	1	1	1	0.653241
142	CEP19_KAN497-15_2.tif:0013-0947	0.818	214.321	0	727	40.338	96.964	0.929	175.225	16717	1.249	0.801	0.987	1.0014
143	CEP19_KAN497-15_3.tif:0001-0007	0.356	207.118	0	898	0.503	0.747	0.803	73.813	7042	2.264	0.442	0.971	0.421836
144	CEP19_KAN497-15_3.tif:0002-0011	1.216	300.853	0	1621	66.684	1.079	0.844	365.806	34899	1.416	0.706	0.921	2.09055
145	CEP19_KAN497-15_3.tif:0003-0028	0.933	260.18	0	854	9.27	2.872	0.909	242.718	23156	1.115	0.897	0.994	1.38711
146	CEP19_KAN497-15_3.tif:0004-0045	0.587	268.411	3	931	47.761	4.607	0.92	157.553	15031	1.143	0.875	1	0.9004
147	CEP19_KAN497-15_3.tif:0005-0135	1.122	268.355	0	1365	91.736	13.799	0.953	300.976	28714	1.198	0.834	0.955	1.72005
148	CEP19_KAN497-15_3.tif:0006-0359	0.744	236.972	0	702	64.136	36.75	0.924	176.357	16825	1.13	0.885	0.993	1.00787
149	CEP19_KAN497-15_3.tif:0007-0377	0.797	229.25	0	819	93.78	38.575	0.905	182.625	17423	1.24	0.806	0.974	1.04369
150	CEP19_KAN497-15_3.tif:0008-0397	0.514	202.429	7	748	134.58	40.696	0.935	103.97	9919	1	1	1	0.594177
151	CEP19_KAN497-15_3.tif:0009-0420	0.514	175.061	0	770	134.682	43.051	0.935	89.913	8578	1	1	1	0.513847
152	CEP19_KAN497-15_3.tif:0010-0435	0.901	325.884	0	1081	133.863	44.536	0.974	293.765	28026	1.11	0.901	0.977	1.67884
153	CEP19_KAN497-15_3.tif:0011-0489	0.839	325.137	9	1313	28.667	50.064	0.887	272.644	26011	1.25	0.8	1	1.55813
154	CEP19_KAN497-15_3.tif:0012-0490	0.891	239.647	0	855	121.42	50.223	0.997	213.515	20370	1.119	0.894	0.971	1.22022
155	CEP19_KAN497-15_3.tif:0013-0525	0.472	260.111	0	626	141.951	53.801	0.859	122.69	11705	1.8	0.556	1	0.701163
156	CEP19_KAN497-15_3.tif:0014-0718	0.901	268.326	5	1160	129.563	73.519	0.94	241.879	23076	1.129	0.886	0.977	1.38232
157	CEP19_KAN497-15_3.tif:0015-0735	0.734	207.114	0	615	5.262	75.24	0.911	151.966	14498	1.149	0.87	0.986	0.868472
158	CEP19_KAN497-15_3.tif:0016-0747	0.66	222.079	3	470	85.482	76.473	0.937	146.652	13991	1.039	0.963	0.992	0.838101
159	CEP19_KAN497-15_3.tif:0017-0797	0.744	228.972	0	778	47.397	81.655	0.924	170.404	16257	1.13	0.885	0.993	0.973841
160	CEP19_KAN497-15_3.tif:0018-0823	0.514	193.061	0	936	98.337	84.311	0.935	99.158	9460	1	1	1	0.566681
161	CEP19_KAN497-15_3.tif:0019-0875	0.66	214.317	35	573	72.799	89.589	0.937	141.526	13502	1.039	0.963	0.992	0.808809
162	CEP19_KAN497-15_3.tif:0020-0913	0.786	226.293	0	1038	106.835	93.525	0.961	177.898	16972	1.19	0.84	0.974	1.01667
163	CEP19_KAN497-15_4.tif:0001-0005	0.409	486.59	0	3155	37.664	0.508	0.78	198.914	18977	2.482	0.403	0.987	1.13678
164	CEP19_KAN497-15_4.tif:0002-0024	1.101	399.514	0	2100	65.921	2.504	0.948	439.704	41949	1.122	0.892	0.981	2.51287
165	CEP19_KAN497-15_4.tif:0003-0070	0.734	267.571	0	1174	88.662	7.218	0.947	196.325	18730	1.146	0.873	0.986	1.12198
166	CEP19_KAN497-15_4.tif:0004-0222	0.514	142.061	6	821	61.48	22.78	0.935	72.964	6961	1	1	1	0.416984
167	CEP19_KAN497-15_4.tif:0005-0312	0.514	216.673	15	658	54.62	31.994	0.935	111.286	10617	1	1	1	0.635989
168	CEP19_KAN497-15_4.tif:0006-0448	0.776	128.041	0	378	20.165	45.893	0.838	99.316	9475	1.598	0.626	0.914	0.56758
169	CEP19_KAN497-15_4.tif:0007-0557	0.587	247.054	0	1384	124.188	57.077	0.92	145.017	13835	1.143	0.875	1	0.828756
170	CEP19_KAN497-15_4.tif:0008-0607	0.66	234.937	0	834	79.704	62.196	0.9	155.142	14801	1.286	0.778	1	0.886623
171	CEP19_KAN497-15_4.tif:0009-0637	0.797	306.092	0	1331	42.033	65.264	0.974	243.839	23263	1.155	0.866	0.974	1.39352
172	CEP19_KAN497-15_4.tif:0010-0813	0.901	179.64	0	922	61.802	83.248	0.867	161.934	15449	1.225	0.816	0.925	0.92544
173	CEP19_KAN497-15_4.tif:0011-0853	0.514	212.408	0	602	41.823	87.382	0.935	109.095	10408	1	1	1	0.623469
174	CEP19_KAN497-15_4.tif:0012-0938	0.66	252.476	0	972	79.089	96.085	0.9	166.724	15906	1.286	0.778	1	0.952815
175	CEP19_KAN497-15_4.tif:0013-0988	0.367	106.857	27	179	129.314	101.16	0.991	39.202	3740	1.065	0.939	0.986	0.224037
176	CEP19_KAN497-15_4.tif:0014-1028	0.587	220.125	0	790	7.064	105.299	0.92	129.21	12327	1.143	0.875	1	0.738423
177	CEP19_KAN497-15_5.tif:0001-0006	0.65	276.274	0	626	68.039	0.661	0.922	179.544	17129	1.288	0.776	0.992	1.02608
178	CEP19_KAN497-15_5.tif:0002-0081	1.09	233.173	0	1084	10.527	8.253	0.898	254.185	24250	1.255	0.797	0.937	1.45264
179	CEP19_KAN497-15_5.tif:0003-0148	0.514	192.571	3	959	127.311	15.204	0.935	98.907	9436	1	1	1	0.565244
180	CEP19_KAN497-15_5.tif:0004-0162	1.006	283.896	0	1458	110.24	16.586	0.924	285.673	27254	1.212	0.825	0.955	1.63259
181	CEP19_KAN497-15_5.tif:0005-0201	1.048	270.24	0	934	47.443	20.65	0.848	283.262	27024	1.316	0.76	0.962	1.61882
182	CEP19_KAN497-15_5.tif:0006-0244	0.514	189.347	7	575	5.17	25.032	0.935	97.251	9278	1	1	1	0.555779
183	CEP19_KAN497-15_5.tif:0007-0642	0.828	295.506	0	999	118.506	65.78	0.941	244.699	23345	1.064	0.94	0.988	1.39843
184	CEP19_KAN497-15_5.tif:0008-0717	0.514	246.653	3	554	93.627	73.458	0.935	126.684	12086	1	1	1	0.723986
185	CEP19_KAN497-15_5.tif:0009-0789	0.912	272.057	0	846	76.944	80.784	0.951	248.095	23669	1.114	0.897	0.983	1.41784
186	CEP19_KAN497-15_5.tif:0010-0880	0.514	182.98	3	1036	121.782	90.146	0.935	93.98	8966	1	1	1	0.537089
187	CEP19_KAN497-15_5.tif:0011-0932	0.65	211.226	17	497	42.181	95.419	0.96	137.27	13096	1.081	0.925	0.984	0.784488
188	CEP19_KAN497-15_5.tif:0012-1002	0.922	323.784	0	1538	121.424	102.637	0.93	298.66	28493	1.126	0.888	0.989	1.70681
189	CEP19_KAN497-15_6.tif:0001-0241	0.66	220.841	0	630	110.566	24.668	0.937	145.834	13913	1.039	0.963	0.992	0.833429
190	CEP19_KAN497-15_6.tif:0002-0248	0.734	240.1	0	910	79.448	25.442	0.947	176.169	16807	1.146	0.873	0.986	1.00679
191	CEP19_KAN497-15_6.tif:0003-0434	0.744	232.507	0	800	39.576	44.438	0.924	173.035	16508	1.13	0.885	0.993	0.988877
192	CEP19_KAN497-15_6.tif:0004-0713	0.828	237.342	0	794	72.082	73.002	0.908	196.535	18750	1.252	0.799	0.994	1.12318
193	CEP19_KAN497-15_6.tif:0005-0807	0.891	210.412	0	461	137.861	82.617	0.962	187.468	17885	1.119	0.894	0.971	1.07136
194	CEP19_KAN497-15_6.tif:0006-0814	0.66	270.937	18	763	80.671	83.332	0.937	178.915	17069	1.039	0.963	0.992	1.02248
195	CEP19_KAN497-15_6.tif:0007-0871	0.828	254.076	0	942	123.011	89.225	0.941	210.392	20072	1.064	0.94	0.988	1.20237
196	CEP19_KAN497-15_6.tif:0008-0889	0.66	190.984	0	558	8.651	91.068	0.9	126.118	12032	1.286	0.778	1	0.720752
										17238.7				1.03265
197	CEP19_KAN497-16_1.tif:0001-0045	0.514	187.388	0	724	61.275	4.658	0.935	96.244	9182	1	1	1	0.550028
198	CEP19_KAN497-16_1.tif:0002-0049	0.66	338.032	0	1694	79.556	5.022	0.937	223.222	21296	1.039	0.963	0.992	1.27569
199	CEP19_KAN497-16_1.tif:0003-0081	0.587	322.304	14	1732	80.523	8.293	0.92	189.187	18049	1.143	0.875	1	1.08119
200	CEP19_KAN497-16_1.tif:0004-0084	0.587	221.911	2	662	91.529	8.651	0.92	130.258	12427	1.143	0.875	1	0.744413
201	CEP19_KAN497-16_1.tif:0005-0138	0.587	278.75	0	1442	84.669	14.18	0.92	163.622	15610	1.143	0.875	1	0.935084
202	CEP19_KAN497-16_1.tif:0006-0177	0.891	257.812	0	1294	124.84	18.126	0.962	229.699	21914	1.139	0.878	0.977	1.31271
203	CEP19_KAN497-16_1.tif:0007-0194	0.587	249	22	934	85.846	19.862	0.92	146.159	13944	1.143	0.875	1	0.835286
204	CEP19_KAN497-16_1.tif:0008-0216	0.514	247.959	9	792	83.492	22.165	0.935	127.355	12150	1	1	1	0.72782
205	CEP19_KAN497-16_1.tif:0009-0258	0.514	214.531	0	900	78.27	26.465	0.935	110.185	10512	1	1	1	0.629699
206	CEP19_KAN497-16_1.tif:0010-0275	0.514	196.041	0	1056	82.775	28.206	0.935	100.689	9606	1	1	1	0.575427
207	CEP19_KAN497-16_1.tif:0011-0332	0.514	214.531	0	1114	87.792	34.042	0.935	110.185	10512	1	1	1	0.629699
208	CEP19_KAN497-16_1.tif:0012-0349	1.247	186.563	0	1257	88.713	35.782	0.717	232.708	22201	2.429	0.412	1	1.3299
209	CEP19_KAN497-16_1.tif:0013-0360	0.514	231.551	0	460	79.601	36.908	0.935	118.927	11346	1	1	1	0.679658
210	CEP19_KAN497-16_1.tif:0014-0378	0.66	298.444	0	2116	85.084	38.706	0.937	197.08	18802	1.039	0.963	0.992	1.12629
211	CEP19_KAN497-16_1.tif:0015-0435	0.514	187.041	0	767	85.539	44.587	0.935	96.066	9165	1	1	1	0.54901
212	CEP19_KAN497-16_1.tif:0016-0450	0.723	237.681	5	1045	87.131	46.127	0.933	171.902	16400	1.172	0.853	0.979	0.982407
213	CEP19_KAN497-16_1.tif:0017-0451	0.514	155.776	0	482	88.611	46.225	0.935	80.008	7633	1	1	1	0.457239
214	CEP19_KAN497-16_1.tif:0018-0463	0.514	254.02	0	1309	95.061	47.454	0.935	130.468	12447	1	1	1	0.745611
215	CEP19_KAN497-16_1.tif:0019-0509	0.587	273.196	0	1288	84.925	52.112	0.92	160.362	15299	1.143	0.875	1	0.916454
216	CEP19_KAN497-16_1.tif:0020-0607	0.587	217.071	12	639	15.152	62.196	0.92	127.417	12156	1.143	0.875	1	0.728179
217	CEP19_KAN497-16_1.tif:0021-0617	0.671	225.312	0	414	42.693	63.169	0.914	151.148	14420	1	1	1	0.8638
218	CEP19_KAN497-16_1.tif:0022-0723	0.734	235.486	0	913	1.485	74.021	0.947	172.783	16484	1.146	0.873	0.986	0.987439
219	CEP19_KAN497-16_1.tif:0023-0775	1.017	279.155	0	1053	123.988	79.34	0.946	283.828	27078	1.026	0.974	0.985	1.62205
220	CEP19_KAN497-16_1.tif:0024-0870	0.723	202.739	0	748	74.948	89.118	0.933	146.631	13989	1.172	0.853	0.979	0.837981
221	CEP19_KAN497-16_1.tif:0025-0983	0.587	228.554	0	1179	101.511	100.64	0.92	134.157	12799	1.143	0.875	1	0.766697
222	CEP19_KAN497-16_1.tif:0026-0990	0.514	259.408	7	1329	96.392	101.408	0.935	133.235	12711	1	1	1	0.761426
223	CEP19_KAN497-16_2.tif:0001-0068	0.901	232.709	1	676	66.198	6.952	0.94	209.773	20013	1.16	0.862	0.983	1.19884
224	CEP19_KAN497-16_2.tif:0002-0257	0.996	291.705	0	1039	58.204	26.353	0.926	290.473	27712	1.232	0.812	0.979	1.66003
225	CEP19_KAN497-16_2.tif:0003-0418	0.901	299.86	0	1308	83.143	42.864	0.94	270.306	25788	1.123	0.891	0.983	1.54478
226	CEP19_KAN497-16_2.tif:0004-0586	0.734	253.771	0	874	87.587	59.995	0.947	186.2	17764	1.146	0.873	0.986	1.06411
227	CEP19_KAN497-16_2.tif:0005-0630	0.734	275.7	0	1161	20.824	64.51	0.947	202.289	19299	1.149	0.87	0.986	1.15607
228	CEP19_KAN497-16_2.tif:0006-0757	0.514	203.776	11	1090	133.556	77.554	0.935	104.661	9985	1	1	1	0.59813
229	CEP19_KAN497-16_2.tif:0007-0774	0.744	249.577	0	939	10.643	79.3	0.924	185.739	17720	1.13	0.885	0.993	1.06148
230	CEP19_KAN497-16_2.tif:0008-0803	0.514	166.469	0	1056	138.163	82.263	0.935	85.501	8157	1	1	1	0.488628
231	CEP19_KAN497-16_2.tif:0009-0829	0.514	233.878	7	1238	135.706	84.925	0.935	120.122	11460	1	1	1	0.686487
232	CEP19_KAN497-16_3.tif:0001-0095	0.807	229.156	0	847	4.761	9.787	0.951	184.952	17645	1.06	0.944	0.975	1.05699
233	CEP19_KAN497-16_3.tif:0002-0133	0.985	319.415	0	1430	112.925	13.616	0.947	314.718	30025	1.045	0.957	0.969	1.79858
234	CEP19_KAN497-16_3.tif:0003-0223	0.891	258.388	0	1099	64.974	22.835	0.962	230.213	21963	1.139	0.878	0.977	1.31565
235	CEP19_KAN497-16_3.tif:0004-0525	0.807	237.455	0	958	12.579	53.764	0.917	191.65	18284	1.286	0.778	0.981	1.09526
236	CEP19_KAN497-16_3.tif:0005-0597	0.639	360.738	0	1272	141.857	61.159	0.907	230.653	22005	1.28	0.781	0.984	1.31816
237	CEP19_KAN497-16_3.tif:0006-0706	0.734	217.914	2	921	20.773	72.332	0.947	159.89	15254	1.125	0.889	0.986	0.913759
238	CEP19_KAN497-16_3.tif:0007-0917	0.692	204.227	0	705	107.283	93.931	0.892	141.285	13479	1.247	0.802	0.957	0.807431
239	CEP19_KAN497-16_3.tif:0008-0924	0.912	234.517	0	762	130.377	94.595	0.951	213.861	20403	1.114	0.897	0.983	1.2222
240	CEP19_KAN497-16_3.tif:0009-1033	0.744	274.352	13	833	25.55	105.765	0.924	204.176	19479	1.13	0.885	0.993	1.16685
241	CEP19_KAN497-16_4.tif:0001-0006	0.556	240.925	0	883	1.902	0.609	0.909	133.843	12769	1.5	0.667	0.991	0.7649
242	CEP19_KAN497-16_4.tif:0002-0238	0.985	187.404	0	750	109.438	24.334	0.798	184.648	17616	1.729	0.578	0.949	1.05525
243	CEP19_KAN497-16_4.tif:0003-0250	0.828	290.62	0	1205	130.03	25.591	0.908	240.653	22959	1.252	0.799	0.994	1.37531
244	CEP19_KAN497-16_4.tif:0004-0285	0.734	269.143	0	1039	4.443	29.189	0.947	197.478	18840	1.149	0.87	0.986	1.12857
245	CEP19_KAN497-16_4.tif:0005-0292	0.744	253.099	13	748	21.198	29.941	0.924	188.359	17970	1.13	0.885	0.993	1.07645
246	CEP19_KAN497-16_4.tif:0006-0410	0.901	299.64	1	1184	133.65	41.967	0.94	270.107	25769	1.16	0.862	0.983	1.54364
247	CEP19_KAN497-16_4.tif:0007-0437	0.828	282.506	0	1520	71.923	44.781	0.941	233.934	22318	1.001	0.999	0.988	1.33691
248	CEP19_KAN497-16_4.tif:0008-0542	0.734	248.471	0	889	61.541	55.531	0.911	182.311	17393	1.149	0.87	0.986	1.04189
249	CEP19_KAN497-16_4.tif:0009-0576	1.509	453.111	0	2657	137.864	59.028	0.895	683.92	65248	1.431	0.699	0.947	3.90854
250	CEP19_KAN497-16_4.tif:0010-0593	0.744	237.479	16	657	108.262	60.717	0.924	176.735	16861	1.13	0.885	0.993	1.01002
251	CEP19_KAN497-16_4.tif:0011-0744	1.038	139.707	0	701	138.126	76.167	0.759	144.975	13831	1.633	0.612	0.917	0.828517
252	CEP19_KAN497-16_4.tif:0012-0771	0.66	208.476	0	761	19.196	78.987	0.9	137.669	13134	1.286	0.778	1	0.786765
253	CEP19_KAN497-16_4.tif:0013-0822	0.66	257.159	0	842	128.289	84.151	0.937	169.817	16201	1.039	0.963	0.992	0.970487
254	CEP19_KAN497-16_4.tif:0014-0911	0.587	271.446	0	1261	117.533	93.32	0.92	159.335	15201	1.143	0.875	1	0.910584
255	CEP19_KAN497-16_4.tif:0015-0924	0.514	205.633	0	851	108.677	94.651	0.935	105.615	10076	1	1	1	0.603581
256	CEP19_KAN497-16_4.tif:0016-0942	0.65	238.242	0	1095	106.783	96.443	0.96	154.828	14771	1.081	0.925	0.984	0.884826
257	CEP19_KAN497-16_5.tif:0001-0040	0.891	327.941	0	1595	134.593	4.108	0.929	292.182	27875	1.185	0.844	0.977	1.66979
258	CEP19_KAN497-16_5.tif:0002-0042	0.734	217.4	0	634	77.144	4.29	0.947	159.513	15218	1.125	0.889	0.986	0.911602
259	CEP19_KAN497-16_5.tif:0003-0048	0.514	186.204	0	639	69.056	4.965	0.935	95.636	9124	1	1	1	0.546554
260	CEP19_KAN497-16_5.tif:0004-0122	0.713	240.265	0	1074	67.725	12.49	0.919	171.253	16338	1.203	0.831	0.971	0.978693
261	CEP19_KAN497-16_5.tif:0005-0220	0.734	254.8	0	1077	0.973	22.524	0.947	186.954	17836	1.146	0.873	0.986	1.06843
262	CEP19_KAN497-16_5.tif:0006-0326	0.514	213.143	16	563	50.935	33.427	0.935	109.473	10444	1	1	1	0.625626
263	CEP19_KAN497-16_5.tif:0007-0328	0.912	362.644	0	1958	82.863	33.593	0.889	330.703	31550	1.149	0.87	0.983	1.88994
264	CEP19_KAN497-16_5.tif:0008-0428	0.587	265.982	18	780	99.975	43.819	0.92	156.127	14895	1.143	0.875	1	0.892253
265	CEP19_KAN497-16_5.tif:0009-0522	0.807	262.091	0	1123	137.763	53.503	0.951	211.534	20181	1.123	0.89	0.981	1.2089
266	CEP19_KAN497-16_5.tif:0010-0531	0.849	141.901	0	516	33.036	54.38	0.816	120.478	11494	1.422	0.703	0.9	0.688524
267	CEP19_KAN497-16_5.tif:0011-0718	0.514	195.592	41	437	120.144	73.561	0.935	100.458	9584	1	1	1	0.574109
268	CEP19_KAN497-16_5.tif:0012-0839	0.734	259.986	9	1116	99.832	85.959	0.911	190.759	18199	1.149	0.87	0.986	1.09017
269	CEP19_KAN497-16_6.tif:0001-0071	0.587	226.304	2	677	11.108	7.269	0.92	132.837	12673	1.143	0.875	1	0.759149
270	CEP19_KAN497-16_6.tif:0002-0106	0.744	227.676	14	626	54.922	10.857	0.924	169.439	16165	1.13	0.885	0.993	0.96833
271	CEP19_KAN497-16_6.tif:0003-0167	0.514	213.429	3	787	22.063	17.149	0.935	109.619	10458	1	1	1	0.626464
272	CEP19_KAN497-16_6.tif:0004-0182	0.587	209.75	0	750	35.373	18.633	0.92	123.12	11746	1.143	0.875	1	0.703619
273	CEP19_KAN497-16_6.tif:0005-0230	0.587	210.357	15	804	13.258	23.548	0.92	123.476	11780	1.143	0.875	1	0.705656
274	CEP19_KAN497-16_6.tif:0006-0263	0.514	190.735	0	781	40.492	26.977	0.935	97.963	9346	1	1	1	0.559852
275	CEP19_KAN497-16_6.tif:0007-0265	0.514	157.796	0	898	45.918	27.182	0.935	81.046	7732	1	1	1	0.463169
276	CEP19_KAN497-16_6.tif:0008-0271	0.671	275.906	0	1299	43.614	27.745	0.914	185.089	17658	1	1	1	1.05777
277	CEP19_KAN497-16_6.tif:0009-0374	0.807	276	0	1225	107.868	38.351	0.951	222.76	21252	1.123	0.89	0.981	1.27306
278	CEP19_KAN497-16_6.tif:0010-0428	0.818	248.936	0	1164	9.829	43.819	0.929	203.526	19417	1.259	0.794	0.987	1.16313
279	CEP19_KAN497-16_6.tif:0011-0507	0.514	225.673	19	906	24.725	51.958	0.935	115.908	11058	1	1	1	0.662406
280	CEP19_KAN497-16_6.tif:0012-0561	1.027	229.643	0	745	117.482	57.436	0.722	235.894	22505	2.06	0.485	0.875	1.34811
281	CEP19_KAN497-16_6.tif:0013-0773	0.587	204.893	0	636	46.02	79.14	0.92	120.269	11474	1.143	0.875	1	0.687326
282	CEP19_KAN497-16_6.tif:0014-0919	1.09	221.462	0	1223	109.215	94.135	0.788	241.418	23032	1.447	0.691	0.881	1.37968
										16797.2				1.0062

## Sheet: Replicate2
	Label	Area	Mean	Min	Max	X	Y	Circ	IntDen	RawIntDen	AR	Round	Solidity						Label	Area	Mean	Min	Max	X	Y	Circ	IntDen	RawIntDen	AR	Round	Solidity
1	CEP19_KAN503-24_1.tif:0001-0040	0.975	223.398	0	1030	85.736	4.165	0.937	217.771	20776	1.251	0.8	0.974	0.772126
2	CEP19_KAN503-24_1.tif:0002-0081	1.331	319.606	0	1743	50.898	8.384	0.864	425.459	40590	1.52	0.658	0.937	1.5085
3	CEP19_KAN503-24_1.tif:0003-0235	1.237	330.356	0	2129	51.893	24.085	0.845	408.604	38982	1.586	0.63	0.971	1.44874
4	CEP19_KAN503-24_1.tif:0004-0293	1.017	101.928	0	652	10.671	30.061	0.933	103.634	9887	1.078	0.928	0.942	0.367444
5	CEP19_KAN503-24_1.tif:0005-0327	1.331	230.677	0	1173	124.465	33.523	0.899	307.077	29296	1.194	0.838	0.951	1.08877
6	CEP19_KAN503-24_1.tif:0006-0371	1.174	257.107	0	1085	30.148	38.039	0.938	301.836	28796	1.021	0.98	0.966	1.07018
7	CEP19_KAN503-24_1.tif:0007-0652	1.163	293.189	0	1481	89.471	66.813	0.947	341.122	32544	1.205	0.83	0.929	1.20948
8	CEP19_KAN503-24_1.tif:0008-0693	0.839	284.413	0	1456	19.538	70.996	0.906	238.494	22753	1.241	0.806	0.947	0.8456
9	CEP19_KAN503-24_1.tif:0009-0791	1.038	239.455	0	1282	139.922	80.99	0.952	248.483	23706	1.134	0.882	0.947	0.881018
10	CEP19_KAN503-24_2.tif:0001-0054	0.996	83.853	0	521	99.151	5.52	0.944	83.498	7966	1.213	0.824	0.945	0.296051
11	CEP19_KAN503-24_2.tif:0002-0094	1.247	218.79	0	1654	57.741	9.614	0.891	272.906	26036	1.311	0.763	0.93	0.96761
12	CEP19_KAN503-24_2.tif:0003-0233	1.268	171.769	0	1366	24.949	23.896	0.88	217.855	20784	1.293	0.773	0.942	0.772423
13	CEP19_KAN503-24_2.tif:0004-0297	1.52	319.586	0	2618	135.924	30.364	0.878	485.729	46340	1.368	0.731	0.948	1.72219
14	CEP19_KAN503-24_2.tif:0005-0383	1.048	259.96	0	1582	113.016	39.246	0.875	272.486	25996	1.217	0.822	0.957	0.966124
15	CEP19_KAN503-24_2.tif:0006-0396	0.849	94.333	0	811	54.913	40.535	0.936	80.092	7641	1.121	0.892	0.9	0.283973
16	CEP19_KAN503-24_2.tif:0007-0442	1.038	191.343	0	1011	67.002	45.226	0.94	198.558	18943	1.232	0.812	0.925	0.704004
17	CEP19_KAN503-24_2.tif:0008-0558	1.163	83.423	0	533	98.957	57.123	0.918	97.062	9260	1.281	0.781	0.937	0.344142
18	CEP19_KAN503-24_2.tif:0009-0733	1.373	218.466	0	1618	126.259	75.015	0.773	299.98	28619	1.785	0.56	0.91	1.06361
19	CEP19_KAN503-24_2.tif:0010-0736	1.059	163.396	0	923	29.093	75.35	0.929	172.982	16503	1.231	0.812	0.931	0.613323
20	CEP19_KAN503-24_2.tif:0011-0829	1.205	290.67	0	1190	90.249	84.885	0.897	350.377	33427	1.459	0.685	0.95	1.24229
21	CEP19_KAN503-24_2.tif:0012-0879	1.279	199.885	0	1097	7.212	90.037	0.863	255.611	24386	1.387	0.721	0.938	0.906289
22	CEP19_KAN503-24_3.tif:0001-0008	1.069	192.804	0	643	56.882	0.818	0.95	206.136	19666	1.097	0.912	0.967	0.730874
23	CEP19_KAN503-24_3.tif:0002-0043	0.922	158.955	0	723	17.241	4.431	0.949	146.62	13988	1.277	0.783	0.957	0.519855
24	CEP19_KAN503-24_3.tif:0003-0143	1.551	434.108	0	1433	4.761	14.633	0.91	673.438	64248	1.531	0.653	0.94	2.38773
25	CEP19_KAN503-24_3.tif:0004-0256	1.143	270.284	0	1309	84.022	26.24	0.875	308.806	29461	1.381	0.724	0.928	1.0949
26	CEP19_KAN503-24_3.tif:0005-0264	1.059	307.713	0	1602	111.811	27.047	0.941	325.766	31079	1.081	0.925	0.967	1.15503
27	CEP19_KAN503-24_3.tif:0006-0345	1.415	207.459	0	1587	29.064	35.356	0.871	293.565	28007	1.29	0.775	0.941	1.04086
28	CEP19_KAN503-24_3.tif:0007-0480	1.237	196.627	0	870	106.339	49.168	0.92	243.2	23202	1.055	0.948	0.952	0.862287
29	CEP19_KAN503-24_3.tif:0008-0618	1.226	201.915	0	1147	71.311	63.328	0.805	247.623	23624	1.867	0.536	0.944	0.87797
30	CEP19_KAN503-24_3.tif:0009-0688	1.436	25.073	0	119	25.489	70.492	0.958	36.005	3435	1.109	0.901	0.948	0.127659
31	CEP19_KAN503-24_3.tif:0010-0691	1.446	208.848	0	1158	131.197	70.804	0.954	302.098	28821	1.182	0.846	0.942	1.07111
32	CEP19_KAN503-24_3.tif:0011-0763	0.985	343.947	0	1619	87.498	78.069	0.848	338.889	32331	1.399	0.715	0.931	1.20156
33	CEP19_KAN503-24_3.tif:0012-0902	0.912	247.368	0	1217	92.759	92.312	0.971	225.58	21521	1.033	0.968	0.951	0.799814
34	CEP19_KAN503-24_3.tif:0013-1032	1.017	210.856	0	1099	1.004	105.721	0.904	214.385	20453	1.385	0.722	0.956	0.760122
35	CEP19_KAN503-24_4.tif:0001-0110	1.583	500.477	0	1885	41.766	11.351	0.773	792.135	75572	1.648	0.607	0.899	2.80858
36	CEP19_KAN503-24_4.tif:0002-0210	1.373	251.931	0	1756	109.046	21.568	0.916	345.933	33003	1.292	0.774	0.932	1.22653
37	CEP19_KAN503-24_4.tif:0003-0249	1.667	227.258	0	1605	69.231	25.555	0.769	378.751	36134	1.715	0.583	0.893	1.3429
38	CEP19_KAN503-24_4.tif:0004-0394	1.195	195.974	0	1173	141.221	40.37	0.853	234.175	22341	1.215	0.823	0.901	0.830288
39	CEP19_KAN503-24_4.tif:0005-0496	1.226	184.504	0	1056	104.748	50.876	0.94	226.272	21587	1.071	0.934	0.955	0.802266
40	CEP19_KAN503-24_4.tif:0006-0511	1.163	209.495	0	1178	135.379	52.288	0.918	243.745	23254	1.095	0.913	0.925	0.864219
41	CEP19_KAN503-24_4.tif:0007-0670	1.614	217.468	0	1163	67.171	68.616	0.856	351.037	33490	1.489	0.672	0.945	1.24463
42	CEP19_KAN503-24_4.tif:0008-0838	1.048	439.94	0	1874	121.486	85.822	0.864	461.139	43994	1.352	0.74	0.917	1.63501
43	CEP19_KAN503-24_5.tif:0001-0162	0.901	76.14	0	536	49.08	16.64	0.927	68.635	6548	1.315	0.761	0.935	0.243352
44	CEP19_KAN503-24_5.tif:0002-0192	1.006	315.677	0	1321	140.356	19.649	0.936	317.653	30305	1.101	0.908	0.985	1.12626
45	CEP19_KAN503-24_5.tif:0003-0324	1.216	225.716	0	1548	72.68	33.124	0.854	274.447	26183	1.41	0.709	0.963	0.973074
46	CEP19_KAN503-24_5.tif:0004-0457	1.426	208.779	0	1232	8.026	46.814	0.868	297.622	28394	1.297	0.771	0.904	1.05524
47	CEP19_KAN503-24_5.tif:0005-0511	0.901	116.988	0	905	38.711	52.383	0.909	105.458	10061	1.101	0.908	0.977	0.37391
48	CEP19_KAN503-24_5.tif:0006-0513	1.478	194.369	0	1265	89.636	52.522	0.876	287.266	27406	1.211	0.825	0.925	1.01853
49	CEP19_KAN503-24_5.tif:0007-0547	1.887	27.289	0	273	104.232	56.032	0.862	51.487	4912	1.137	0.88	0.911	0.182551
50	CEP19_KAN503-24_5.tif:0008-0656	1.31	467.736	0	1779	32.203	67.199	0.936	612.843	58467	1.364	0.733	0.958	2.17289
51	CEP19_KAN503-24_5.tif:0009-0665	1.111	171.896	0	902	66.408	68.129	0.975	190.99	18221	1.137	0.879	0.955	0.677171
52	CEP19_KAN503-24_5.tif:0010-0758	1.677	268.469	0	2099	131.157	77.516	0.83	450.248	42955	1.515	0.66	0.904	1.59639
53	CEP19_KAN503-24_5.tif:0011-0806	0.985	369.723	0	1865	96.602	82.555	0.917	364.287	34754	1.218	0.821	0.974	1.29161
54	CEP19_KAN503-24_5.tif:0012-1016	1.247	135.185	0	727	105.748	104.084	0.902	168.622	16087	1.164	0.859	0.952	0.597863
55	CEP19_KAN503-24_6.tif:0001-0087	1.488	227.493	0	1576	22.743	8.95	0.892	338.606	32304	1.249	0.801	0.966	1.20056
56	CEP19_KAN503-24_6.tif:0002-0134	1.163	219.018	0	794	41.671	13.698	0.93	254.824	24311	1.207	0.829	0.961	0.903502
57	CEP19_KAN503-24_6.tif:0003-0169	1.3	251.935	0	1456	107.468	17.37	0.928	327.453	31240	1.24	0.806	0.939	1.16101
58	CEP19_KAN503-24_6.tif:0004-0171	1.226	267.701	0	1522	80.607	17.532	0.861	328.302	31321	1.148	0.871	0.944	1.16402
59	CEP19_KAN503-24_6.tif:0005-0203	1.446	306.145	0	2005	122.353	20.839	0.939	442.838	42248	1.248	0.801	0.962	1.57012
60	CEP19_KAN503-24_6.tif:0006-0275	0.849	74.704	0	456	7.929	28.144	0.95	63.426	6051	1.234	0.811	0.959	0.224881
61	CEP19_KAN503-24_6.tif:0007-0386	0.933	289.36	0	1326	119.529	39.577	0.927	269.939	25753	1.321	0.757	0.952	0.957093
62	CEP19_KAN503-24_6.tif:0008-0565	1.163	176.243	0	1036	80.369	57.865	0.959	205.057	19563	1.224	0.817	0.965	0.727046
63	CEP19_KAN503-24_6.tif:0009-0810	1.122	321.495	0	1525	112.165	82.987	0.953	360.576	34400	1.2	0.833	0.951	1.27845
64	CEP19_KAN503-24_6.tif:0010-0830	1.048	249.35	0	1024	47.364	85.017	0.891	261.365	24935	1.511	0.662	0.93	0.926693
65	CEP19_KAN503-24_6.tif:0011-0863	1.195	252.842	0	1047	74.855	88.346	0.927	302.129	28824	1.192	0.839	0.979	1.07122
66	CEP19_KAN503-24_6.tif:0012-0994	1.499	211.399	0	1481	125.355	101.814	0.889	316.867	30230	1.26	0.793	0.938	1.12348
67	CEP19_KAN503-24_6.tif:0013-1003	1.205	216.426	0	1081	26.068	102.721	0.897	260.883	24889	1.114	0.898	0.947	0.924983
										26907.5				1
68	CEP19_KAN503-25_1.tif:0001-0078	1.551	229.243	0	1276	84.45	8.071	0.92	355.629	33928	1.024	0.977	0.958	1.26091
69	CEP19_KAN503-25_1.tif:0002-0111	1.52	310.731	0	1584	139.025	11.384	0.95	472.271	45056	1.197	0.835	0.945	1.67448
70	CEP19_KAN503-25_1.tif:0003-0156	1.268	131.669	0	711	22.093	15.989	0.917	166.997	15932	1.194	0.838	0.972	0.592102
71	CEP19_KAN503-25_1.tif:0004-0232	1.31	122.96	0	437	93.704	23.763	0.963	161.106	15370	1.082	0.924	0.954	0.571216
72	CEP19_KAN503-25_1.tif:0005-0333	1.488	156.655	0	805	54.818	34.141	0.93	233.169	22245	1.057	0.946	0.937	0.82672
73	CEP19_KAN503-25_1.tif:0006-0345	1.541	283.367	0	1984	133.909	35.298	0.913	436.622	41655	1.19	0.841	0.948	1.54808
74	CEP19_KAN503-25_1.tif:0007-0436	1.237	125.398	0	421	102.187	44.699	0.976	155.1	14797	1.136	0.88	0.955	0.549921
75	CEP19_KAN503-25_1.tif:0008-0460	1.101	212.057	0	1109	53.052	47.063	0.935	233.389	22266	1.201	0.833	0.95	0.827501
76	CEP19_KAN503-25_1.tif:0009-0775	1.426	313.669	0	2342	126.308	79.311	0.926	447.146	42659	1.074	0.931	0.948	1.58539
77	CEP19_KAN503-25_1.tif:0010-0878	1.048	80.41	0	410	63.218	89.915	0.838	84.285	8041	1.181	0.847	0.909	0.298838
78	CEP19_KAN503-25_1.tif:0011-0881	1.279	230.672	0	1128	91.054	90.158	0.968	294.98	28142	1.107	0.904	0.946	1.04588
79	CEP19_KAN503-25_1.tif:0012-0890	1.394	351.947	0	2293	138.717	91.16	0.93	490.645	46809	1.098	0.911	0.943	1.73963
80	CEP19_KAN503-25_2.tif:0001-0007	1.237	200.864	0	1109	116.622	0.727	0.835	248.441	23702	1.65	0.606	0.971	0.880869
81	CEP19_KAN503-25_2.tif:0002-0129	1.436	217.051	0	1316	134.161	13.218	0.932	311.689	29736	1.284	0.779	0.951	1.10512
82	CEP19_KAN503-25_2.tif:0003-0251	1.488	301.662	0	1726	42.904	25.75	0.966	449.001	42836	1.058	0.945	0.963	1.59197
83	CEP19_KAN503-25_2.tif:0004-0361	1.279	162.32	0	1064	16.865	36.975	0.951	207.572	19803	1.093	0.915	0.968	0.735965
84	CEP19_KAN503-25_2.tif:0005-0461	1.373	150.321	0	884	109.191	47.156	0.942	206.409	19692	1.094	0.914	0.946	0.73184
85	CEP19_KAN503-25_2.tif:0006-0536	1.363	201.869	0	1419	67.207	54.867	0.885	275.075	26243	1.204	0.83	0.925	0.975303
86	CEP19_KAN503-25_2.tif:0007-0566	1.52	153.483	0	1255	131.856	57.901	0.925	233.274	22255	1.221	0.819	0.948	0.827092
87	CEP19_KAN503-25_2.tif:0008-0625	0.912	558.943	0	2099	105.192	63.993	0.951	509.712	48628	1.114	0.897	0.983	1.80723
88	CEP19_KAN503-25_2.tif:0009-0773	1.405	251.709	0	1790	87.64	79.124	0.922	353.543	33729	1.126	0.888	0.971	1.25352
89	CEP19_KAN503-25_2.tif:0010-0825	1.174	254.125	0	1104	25.225	84.513	0.967	298.335	28462	1.057	0.946	0.966	1.05777
90	CEP19_KAN503-25_2.tif:0011-0901	1.216	83.319	0	471	70.291	92.237	0.932	101.307	9665	1.248	0.801	0.943	0.359193
91	CEP19_KAN503-25_2.tif:0012-0912	1.321	108.294	0	485	34.952	93.36	0.943	143.025	13645	1.094	0.914	0.944	0.507107
92	CEP19_KAN503-25_2.tif:0013-0974	1.509	156.306	0	721	106.354	99.701	0.943	235.926	22508	1.176	0.851	0.947	0.836495
93	CEP19_KAN503-25_2.tif:0014-1001	1.53	335.377	0	2180	93.165	102.579	0.884	513.244	48965	1.418	0.705	0.964	1.81975
94	CEP19_KAN503-25_2.tif:0015-1006	1.436	187.657	0	943	136.526	102.981	0.907	269.478	25709	1.332	0.751	0.965	0.955458
95	CEP19_KAN503-25_3.tif:0001-0079	1.478	199.603	0	1582	25.862	8.144	0.949	295.001	28144	1.028	0.972	0.94	1.04595
96	CEP19_KAN503-25_3.tif:0002-0146	1.95	272.317	0	2146	74.882	14.894	0.946	530.917	50651	1.257	0.796	0.937	1.88241
97	CEP19_KAN503-25_3.tif:0003-0227	1.415	237.963	0	1669	16.488	23.27	0.944	336.73	32125	1.085	0.921	0.947	1.1939
98	CEP19_KAN503-25_3.tif:0004-0304	1.635	251.718	0	1512	60.147	31.112	0.959	411.602	39268	1.112	0.899	0.951	1.45937
99	CEP19_KAN503-25_3.tif:0005-0400	1.478	317.851	0	1627	101.631	40.988	0.934	469.765	44817	1.111	0.9	0.962	1.66559
100	CEP19_KAN503-25_3.tif:0006-0450	1.122	317.364	0	1670	125.045	46.067	0.908	355.943	33958	1.105	0.905	0.986	1.26203
101	CEP19_KAN503-25_3.tif:0007-0454	1.572	195.2	0	1658	34.869	46.521	0.885	306.909	29280	1.204	0.831	0.952	1.08817
102	CEP19_KAN503-25_3.tif:0008-0518	1.446	252.522	0	1497	58.192	53.044	0.904	365.272	34848	1.23	0.813	0.932	1.2951
103	CEP19_KAN503-25_3.tif:0009-0612	1.593	170.112	0	1063	77.506	62.661	0.879	271.029	25857	1.368	0.731	0.91	0.960958
104	CEP19_KAN503-25_3.tif:0010-0839	1.384	306.523	0	1196	134.953	85.87	0.961	424.107	40461	1.057	0.946	0.971	1.50371
105	CEP19_KAN503-25_3.tif:0011-0857	1.373	167.931	0	897	106.62	87.74	0.969	230.59	21999	1.09	0.918	0.939	0.817578
106	CEP19_KAN503-25_3.tif:0012-0881	1.405	203.522	0	1119	40.143	90.23	0.937	285.861	27272	1.084	0.923	0.944	1.01355
107	CEP19_KAN503-25_3.tif:0013-1002	1.604	184.052	0	1325	94.181	102.653	0.917	295.169	28160	1.254	0.797	0.936	1.04655
108	CEP19_KAN503-25_3.tif:0014-1010	0.964	100.207	0	215	52.416	103.394	0.927	96.632	9219	1.079	0.927	0.958	0.342618
109	CEP19_KAN503-25_4.tif:0001-0178	1.226	369.88	0	1945	48.039	18.219	0.912	453.613	43276	1.231	0.812	0.959	1.60832
110	CEP19_KAN503-25_4.tif:0002-0210	1.457	295.54	0	1396	83.322	21.513	0.921	430.595	41080	1.302	0.768	0.962	1.52671
111	CEP19_KAN503-25_4.tif:0003-0274	1.551	219.588	0	1549	118.646	28.04	0.92	340.65	32499	1.246	0.803	0.952	1.2078
112	CEP19_KAN503-25_4.tif:0004-0346	1.226	166.88	0	930	15.726	35.434	0.912	204.658	19525	1.188	0.841	0.959	0.725634
113	CEP19_KAN503-25_4.tif:0005-0496	1.216	290.509	0	1563	51.731	50.79	0.932	353.228	33699	1.168	0.856	0.955	1.2524
114	CEP19_KAN503-25_4.tif:0006-0533	1.761	208.75	0	1598	71.252	54.552	0.86	367.599	35070	1.389	0.72	0.946	1.30335
115	CEP19_KAN503-25_4.tif:0007-0600	1.467	230.021	0	1422	119.891	61.538	0.848	337.547	32203	1.551	0.645	0.936	1.1968
116	CEP19_KAN503-25_4.tif:0008-0697	1.583	213.788	0	1573	48.256	71.316	0.839	338.375	32282	1.433	0.698	0.938	1.19974
117	CEP19_KAN503-25_4.tif:0009-0771	0.912	132.621	0	646	11.234	79.019	0.907	120.94	11538	1.346	0.743	0.956	0.428802
118	CEP19_KAN503-25_4.tif:0010-0806	1.572	316.44	0	2445	135.268	82.619	0.908	497.532	47466	1.107	0.903	0.952	1.76404
119	CEP19_KAN503-25_4.tif:0011-0820	1.394	256.812	0	1649	88.599	83.973	0.871	358.018	34156	1.2	0.833	0.905	1.26938
120	CEP19_KAN503-25_4.tif:0012-0830	1.174	335.125	0	1354	72.382	84.993	0.938	393.426	37534	1.207	0.828	0.97	1.39493
121	CEP19_KAN503-25_4.tif:0013-0899	1.467	115.786	0	659	105.731	92.008	0.932	169.911	16210	1.203	0.831	0.915	0.602434
122	CEP19_KAN503-25_4.tif:0014-0946	1.09	132.981	0	795	11.012	96.916	0.898	144.964	13830	1.247	0.802	0.937	0.513983
123	CEP19_KAN503-25_4.tif:0015-0976	1.405	303.918	0	1868	134.298	99.905	0.937	426.874	40725	1.118	0.895	0.944	1.51352
124	CEP19_KAN503-25_4.tif:0016-1024	1.604	202.294	0	1767	79.574	104.911	0.941	324.424	30951	1.097	0.911	0.939	1.15027
125	CEP19_KAN503-25_5.tif:0001-0009	1.635	169.288	0	1175	92.399	0.942	0.921	276.815	26409	1.013	0.987	0.969	0.981473
126	CEP19_KAN503-25_5.tif:0002-0016	1.352	308.791	0	2057	114.587	1.665	0.939	417.534	39834	1.194	0.838	0.966	1.4804
127	CEP19_KAN503-25_5.tif:0003-0094	1.499	204.748	0	1238	92.764	9.653	0.898	306.898	29279	1.269	0.788	0.969	1.08813
128	CEP19_KAN503-25_5.tif:0004-0113	1.73	173.436	0	1406	15.534	11.604	0.908	299.959	28617	1.253	0.798	0.94	1.06353
129	CEP19_KAN503-25_5.tif:0005-0233	1.866	201.343	0	1728	123.314	23.865	0.834	375.659	35839	1.248	0.801	0.901	1.33193
130	CEP19_KAN503-25_5.tif:0006-0258	1.446	427.051	0	3148	135.375	26.46	0.954	617.727	58933	1.015	0.985	0.932	2.19021
131	CEP19_KAN503-25_5.tif:0007-0261	1.635	222.821	0	1545	53.453	26.721	0.867	364.349	34760	1.344	0.744	0.948	1.29183
132	CEP19_KAN503-25_5.tif:0008-0306	1.53	274.712	0	1795	107.649	31.371	0.946	420.406	40108	1.087	0.92	0.924	1.49059
133	CEP19_KAN503-25_5.tif:0009-0381	1.373	243.626	0	1356	93.36	39.031	0.953	334.529	31915	1.019	0.982	0.96	1.1861
134	CEP19_KAN503-25_5.tif:0010-0479	1.688	225.317	0	1215	80.216	49.045	0.886	380.24	36276	1.317	0.759	0.936	1.34817
135	CEP19_KAN503-25_5.tif:0011-0636	1.415	202.007	0	1287	54.96	65.143	0.861	285.851	27271	1.244	0.804	0.906	1.01351
136	CEP19_KAN503-25_5.tif:0012-0688	1.09	308.952	0	1262	41.684	70.498	0.939	336.793	32131	1.125	0.889	0.977	1.19413
137	CEP19_KAN503-25_5.tif:0013-0733	1.761	226.304	0	1507	130.892	75.1	0.851	398.51	38019	1.722	0.581	0.939	1.41295
138	CEP19_KAN503-25_5.tif:0014-0931	1.541	257.864	0	1696	74.211	95.327	0.938	397.325	37906	1.319	0.758	0.958	1.40875
139	CEP19_KAN503-25_5.tif:0015-1004	1.446	177.688	0	1098	25.302	102.76	0.965	257.026	24521	1.097	0.912	0.965	0.911306
140	CEP19_KAN503-25_6.tif:0001-0128	1.855	308.853	0	2228	56.475	13.048	0.837	573.012	54667	1.648	0.607	0.957	2.03166
141	CEP19_KAN503-25_6.tif:0002-0258	1.688	279.137	0	2254	87.876	26.378	0.954	471.065	44941	1.14	0.877	0.95	1.6702
142	CEP19_KAN503-25_6.tif:0003-0299	1.384	264.515	0	1247	117.328	30.627	0.961	365.985	34916	1.064	0.94	0.967	1.29763
143	CEP19_KAN503-25_6.tif:0004-0373	1.405	199.709	0	1480	33.71	38.158	0.779	280.505	26761	1.886	0.53	0.964	0.994555
144	CEP19_KAN503-25_6.tif:0005-0390	1.467	314.007	0	1849	108.198	39.967	0.917	460.793	43961	1.225	0.817	0.927	1.63378
145	CEP19_KAN503-25_6.tif:0006-0423	1.656	195.557	0	1474	40.493	43.315	0.913	323.868	30898	1.246	0.803	0.935	1.1483
146	CEP19_KAN503-25_6.tif:0007-0550	1.562	219.604	0	1673	10.367	56.337	0.879	342.977	32721	1.28	0.781	0.961	1.21605
147	CEP19_KAN503-25_6.tif:0008-0569	1.478	180.915	0	1334	99.992	58.315	0.975	267.382	25509	1.046	0.956	0.943	0.948025
148	CEP19_KAN503-25_6.tif:0009-0602	1.467	266.186	0	1818	69.557	61.657	0.893	390.617	37266	1.187	0.842	0.918	1.38497
149	CEP19_KAN503-25_6.tif:0010-0621	1.551	251.5	0	1840	88.145	63.566	0.934	390.156	37222	1.149	0.87	0.94	1.38333
150	CEP19_KAN503-25_6.tif:0011-0642	1.446	279.667	0	1785	116.116	65.758	0.89	404.537	38594	1.117	0.895	0.958	1.43432
151	CEP19_KAN503-25_6.tif:0012-0874	1.384	388.545	0	2377	111.557	89.538	0.934	537.594	51288	1.228	0.815	0.967	1.90608
152	CEP19_KAN503-25_6.tif:0013-0975	1.363	122.569	0	633	97.73	99.845	0.92	167.018	15934	1.167	0.857	0.959	0.592176
153	CEP19_KAN503-25_6.tif:0014-0982	1.184	339.912	0	1990	119.931	100.588	0.947	402.608	38410	1.04	0.961	0.97	1.42748
										31808				1.18212
154	CEP19_KAN503-26_1.tif:0001-0007	0.891	245.906	0	1769	118.418	0.723	0.916	219.092	20902	1.216	0.823	0.944	0.776809
155	CEP19_KAN503-26_1.tif:0002-0075	1.216	164.362	0	1117	9.899	7.742	0.916	199.847	19066	1.054	0.949	0.983	0.708575
156	CEP19_KAN503-26_1.tif:0003-0121	1.939	438.141	0	3140	112.076	12.396	0.907	849.618	81056	1.203	0.832	0.932	3.01239
157	CEP19_KAN503-26_1.tif:0004-0121	1.52	314.214	0	1910	80.407	12.406	0.778	477.564	45561	1.843	0.543	0.892	1.69324
158	CEP19_KAN503-26_1.tif:0005-0216	1.73	232.418	0	1866	20.572	22.151	0.798	401.969	38349	1.804	0.554	0.922	1.42521
159	CEP19_KAN503-26_1.tif:0006-0321	0.985	103.713	0	300	119.033	32.826	0.934	102.188	9749	1.105	0.905	0.949	0.362315
160	CEP19_KAN503-26_1.tif:0007-0366	1.247	222.496	0	1096	62.977	37.546	0.956	277.528	26477	1.117	0.895	0.964	0.984
161	CEP19_KAN503-26_1.tif:0008-0378	1.593	178.987	0	1456	37.25	38.649	0.888	285.169	27206	1.36	0.736	0.935	1.01109
162	CEP19_KAN503-26_1.tif:0009-0397	0.985	109.894	0	463	20.726	40.691	0.917	108.278	10330	1.233	0.811	0.974	0.383908
163	CEP19_KAN503-26_1.tif:0010-0426	1.038	127.01	0	891	90.508	43.668	0.922	131.799	12574	1.341	0.746	0.961	0.467304
164	CEP19_KAN503-26_1.tif:0011-0433	1.677	558.288	0	1908	105.034	44.366	0.88	936.303	89326	1.078	0.928	0.92	3.31974
165	CEP19_KAN503-26_1.tif:0012-0585	1.572	225.927	0	1449	70.136	59.9	0.932	355.22	33889	1.272	0.786	0.958	1.25946
166	CEP19_KAN503-26_1.tif:0013-0658	1.572	188.313	0	1396	7.767	67.311	0.876	296.081	28247	1.375	0.727	0.923	1.04978
167	CEP19_KAN503-26_1.tif:0014-0696	1.457	256.029	0	1528	43.615	71.358	0.864	373.028	35588	1.351	0.74	0.927	1.3226
168	CEP19_KAN503-26_1.tif:0015-0746	1.53	146.651	0	860	69.811	76.441	0.811	224.427	21411	1.332	0.751	0.904	0.795725
169	CEP19_KAN503-26_1.tif:0016-0787	1.342	170.469	0	1186	96.509	80.536	0.921	228.714	21820	1.353	0.739	0.941	0.810926
170	CEP19_KAN503-26_1.tif:0017-0906	1.174	166.125	0	1006	21.546	92.753	0.927	195.025	18606	1.23	0.813	0.929	0.691479
171	CEP19_KAN503-26_1.tif:0018-0973	1.195	353.43	0	2000	75.025	99.645	0.943	422.325	40291	1.177	0.849	0.954	1.49739
172	CEP19_KAN503-26_2.tif:0001-0057	1.824	210.046	0	1551	96.237	5.923	0.853	383.091	36548	1.478	0.677	0.913	1.35828
173	CEP19_KAN503-26_2.tif:0002-0069	1.656	204.715	0	1378	25.783	7.081	0.869	339.036	32345	1.512	0.662	0.924	1.20208
174	CEP19_KAN503-26_2.tif:0003-0120	1.73	202.994	0	1509	130.838	12.267	0.836	351.079	33494	1.558	0.642	0.909	1.24478
175	CEP19_KAN503-26_2.tif:0004-0324	1.069	98.824	0	1040	16.07	33.175	0.938	105.657	10080	1.283	0.779	0.936	0.374616
176	CEP19_KAN503-26_2.tif:0005-0338	1.426	71.463	0	671	64.898	34.584	0.901	101.873	9719	1.36	0.735	0.958	0.3612
177	CEP19_KAN503-26_2.tif:0006-0371	1.321	121.135	0	923	87.418	37.972	0.943	159.985	15263	1.002	0.998	0.947	0.567239
178	CEP19_KAN503-26_2.tif:0007-0454	1.373	314.321	0	1748	122.982	46.545	0.868	431.601	41176	1.47	0.68	0.932	1.53028
179	CEP19_KAN503-26_2.tif:0008-0638	1.143	116.037	0	482	101.787	65.393	0.971	132.575	12648	1.101	0.908	0.96	0.470054
180	CEP19_KAN503-26_2.tif:0009-0709	0.891	295.118	0	1189	59.295	72.589	0.949	262.937	25085	1.322	0.756	0.934	0.932267
181	CEP19_KAN503-26_2.tif:0010-0768	1.143	147.312	0	1030	25.916	78.608	0.913	168.307	16057	1.193	0.838	0.956	0.596748
182	CEP19_KAN503-26_2.tif:0011-0865	1.887	195.756	0	1523	132.558	88.611	0.814	369.339	35236	1.717	0.582	0.952	1.30952
183	CEP19_KAN503-26_2.tif:0012-0936	1.593	270.737	0	1707	81.342	95.948	0.888	431.349	41152	1.339	0.747	0.933	1.52939
184	CEP19_KAN503-26_3.tif:0001-0099	1.583	395.258	0	2120	78.907	10.103	0.914	625.599	59684	1.234	0.81	0.965	2.21812
185	CEP19_KAN503-26_3.tif:0002-0146	1.971	223.489	0	2106	47.792	14.884	0.809	440.406	42016	1.366	0.732	0.883	1.5615
186	CEP19_KAN503-26_3.tif:0003-0329	1.09	70.019	0	505	101.966	33.725	0.939	76.329	7282	1.091	0.917	0.972	0.270631
187	CEP19_KAN503-26_3.tif:0004-0469	1.331	252.425	0	1448	71.834	48.061	0.769	336.027	32058	1.633	0.612	0.879	1.19141
188	CEP19_KAN503-26_3.tif:0005-0480	0.975	32.925	0	147	23.133	49.165	0.969	32.095	3062	1.028	0.973	0.974	0.113797
189	CEP19_KAN503-26_3.tif:0006-0607	1.31	191.408	0	1072	108.688	62.146	0.91	250.789	23926	1.076	0.93	0.951	0.889194
190	CEP19_KAN503-26_3.tif:0007-0638	1.541	145.224	0	1214	2.931	65.324	0.928	223.767	21348	1.167	0.857	0.936	0.793384
191	CEP19_KAN503-26_3.tif:0008-0668	2.044	200.533	0	1812	123.117	68.406	0.839	409.883	39104	1.43	0.699	0.894	1.45327
192	CEP19_KAN503-26_3.tif:0009-0737	1.75	187.85	0	1403	15.927	75.54	0.846	328.826	31371	1.305	0.766	0.908	1.16588
193	CEP19_KAN503-26_3.tif:0010-0831	1.216	148.172	0	853	78.59	85.064	0.932	180.162	17188	1.094	0.914	0.947	0.63878
194	CEP19_KAN503-26_3.tif:0011-0862	0.933	109.056	0	668	73.755	88.286	0.959	101.737	9706	1.254	0.797	0.952	0.360717
195	CEP19_KAN503-26_3.tif:0012-0867	1.415	141.356	0	1137	38.57	88.797	0.908	200.025	19083	1.473	0.679	0.938	0.709207
196	CEP19_KAN503-26_3.tif:0013-0870	0.922	153.352	0	734	22.371	89.128	0.949	141.453	13495	1.3	0.77	0.946	0.501533
197	CEP19_KAN503-26_3.tif:0014-0892	1.415	201.015	0	1576	59.613	91.368	0.75	284.446	27137	1.881	0.532	0.877	1.00853
198	CEP19_KAN503-26_3.tif:0015-1028	1.562	225.812	0	1330	5.624	105.214	0.926	352.673	33646	1.222	0.818	0.961	1.25043
199	CEP19_KAN503-26_4.tif:0001-0079	1.499	292.531	0	2363	86.228	8.062	0.875	438.477	41832	1.288	0.776	0.966	1.55466
200	CEP19_KAN503-26_4.tif:0002-0136	1.237	173.314	0	806	37.166	14.003	0.948	214.365	20451	1.149	0.871	0.959	0.760048
201	CEP19_KAN503-26_4.tif:0003-0224	1.31	75.224	0	619	13.959	23.036	0.91	98.561	9403	1.205	0.83	0.954	0.349456
202	CEP19_KAN503-26_4.tif:0004-0243	1.394	130.534	0	1027	139.081	24.935	0.957	181.976	17361	1.098	0.911	0.96	0.64521
203	CEP19_KAN503-26_4.tif:0005-0248	1.394	308.955	0	2005	78.607	25.458	0.93	430.71	41091	1.088	0.919	0.943	1.52712
204	CEP19_KAN503-26_4.tif:0006-0273	1.363	212.815	0	1505	59.17	27.943	0.946	289.991	27666	1.033	0.968	0.956	1.02819
205	CEP19_KAN503-26_4.tif:0007-0279	1.604	265.484	0	2194	101.293	28.616	0.903	425.763	40619	1.398	0.716	0.965	1.50958
206	CEP19_KAN503-26_4.tif:0008-0372	1.006	141.417	0	529	54.629	38.123	0.855	142.302	13576	1.695	0.59	0.928	0.504543
207	CEP19_KAN503-26_4.tif:0009-0647	1.153	146.582	0	337	123.566	66.226	0.98	169.009	16124	1.209	0.827	0.965	0.599238
208	CEP19_KAN503-26_4.tif:0010-0718	1.205	216.061	0	1222	65.965	73.494	0.981	260.443	24847	1.135	0.881	0.954	0.923422
209	CEP19_KAN503-26_4.tif:0011-0728	1.101	85.59	0	425	27.616	74.589	0.965	94.2	8987	1.152	0.868	0.95	0.333996
210	CEP19_KAN503-26_4.tif:0012-0789	1.279	385.631	0	2053	123.551	80.81	0.898	493.14	47047	1.206	0.829	0.972	1.74847
211	CEP19_KAN503-26_4.tif:0013-0805	1.163	178.892	0	1031	19.856	82.506	0.947	208.138	19857	1.073	0.932	0.933	0.737972
212	CEP19_KAN503-26_4.tif:0014-0982	1.52	201.772	0	1451	17.356	100.513	0.834	306.668	29257	1.241	0.806	0.929	1.08732
213	CEP19_KAN503-26_5.tif:0001-0079	1.478	261.979	0	1534	118.762	8.115	0.876	387.189	36939	1.228	0.814	0.934	1.37281
214	CEP19_KAN503-26_5.tif:0002-0166	1.688	176.54	0	1207	53.207	17.031	0.886	297.926	28423	1.098	0.911	0.925	1.05632
215	CEP19_KAN503-26_5.tif:0003-0346	1.426	313.919	0	2695	83.93	35.489	0.854	447.502	42693	1.387	0.721	0.941	1.58666
216	CEP19_KAN503-26_5.tif:0004-0348	1.331	308.85	0	1564	69.009	35.684	0.909	411.14	39224	1.1	0.909	0.981	1.45773
217	CEP19_KAN503-26_5.tif:0005-0621	1.258	202.5	0	1323	87.945	63.632	0.898	254.709	24300	1.071	0.933	0.934	0.903093
218	CEP19_KAN503-26_5.tif:0006-0643	1.467	333.836	0	2124	112.352	65.843	0.907	489.891	46737	1.32	0.758	0.915	1.73695
219	CEP19_KAN503-26_5.tif:0007-0648	1.268	299.322	0	1395	45.572	66.354	0.906	379.632	36218	1.366	0.732	0.949	1.34602
220	CEP19_KAN503-26_5.tif:0008-0775	1.551	177.716	0	1412	69.45	79.334	0.864	275.694	26302	1.548	0.646	0.934	0.977496
221	CEP19_KAN503-26_5.tif:0009-0793	1.771	201.669	0	1518	23.804	81.296	0.93	357.243	34082	1.152	0.868	0.952	1.26663
222	CEP19_KAN503-26_5.tif:0010-0981	0.922	277.966	0	1551	81.293	100.433	0.949	256.397	24461	1.191	0.84	0.946	0.909077
223	CEP19_KAN503-26_6.tif:0001-0036	1.771	264.467	0	1728	72.7	3.668	0.856	468.487	44695	1.519	0.659	0.923	1.66106
224	CEP19_KAN503-26_6.tif:0002-0186	1.845	235.602	0	1851	85.251	19.043	0.806	434.641	41466	1.596	0.627	0.914	1.54106
225	CEP19_KAN503-26_6.tif:0003-0236	2.054	209.985	0	1872	119.745	24.174	0.825	431.402	41157	1.404	0.712	0.901	1.52957
226	CEP19_KAN503-26_6.tif:0004-0375	1.059	26.752	0	234	103.379	38.421	0.912	28.322	2702	1.101	0.909	0.962	0.100418
227	CEP19_KAN503-26_6.tif:0005-0387	1.824	156.397	0	1486	74.478	39.619	0.779	285.243	27213	1.173	0.853	0.888	1.01135
228	CEP19_KAN503-26_6.tif:0006-0391	1.478	173.454	0	1306	141.098	40.019	0.949	256.355	24457	1.153	0.867	0.94	0.908928
229	CEP19_KAN503-26_6.tif:0007-0455	1.153	108.909	0	1014	40.818	46.585	0.883	125.573	11980	1.614	0.619	0.944	0.445229
230	CEP19_KAN503-26_6.tif:0008-0501	1.457	212.209	0	1572	19.482	51.354	0.812	309.183	29497	1.349	0.741	0.885	1.09624
231	CEP19_KAN503-26_6.tif:0009-0656	1.331	53.724	0	320	88.158	67.231	0.899	71.518	6823	1.219	0.82	0.962	0.253572
232	CEP19_KAN503-26_6.tif:0010-0831	0.901	18.105	0	121	104.631	85.098	0.994	16.32	1557	1.138	0.878	0.95	0.0578649
233	CEP19_KAN503-26_6.tif:0011-0996	1.059	139.614	0	667	69.625	102.025	0.912	147.805	14101	1.363	0.734	0.976	0.524054
										27656.3				1.02783
234	CEP19_KAN503-27_1.tif:0001-0200	2.998	332.573	0	2766	121.83	20.472	0.763	996.993	95116	1.903	0.526	0.917	3.53492
235	CEP19_KAN503-27_1.tif:0002-0281	1.289	122.203	0	861	14.812	28.776	0.91	157.553	15031	1.23	0.813	0.914	0.558617
236	CEP19_KAN503-27_1.tif:0003-0286	0.912	493.816	0	1959	74.334	29.337	0.951	450.322	42962	1.114	0.897	0.983	1.59665
237	CEP19_KAN503-27_1.tif:0004-0370	1.027	68.724	0	487	91.273	37.872	0.974	70.595	6735	1.138	0.879	0.951	0.250302
238	CEP19_KAN503-27_1.tif:0005-0375	1.53	431.014	0	2015	49.346	38.383	0.884	659.602	62928	1.271	0.787	0.939	2.33868
239	CEP19_KAN503-27_1.tif:0006-0420	1.709	153.196	0	1136	69.86	43.095	0.826	261.743	24971	1.313	0.762	0.901	0.92803
240	CEP19_KAN503-27_1.tif:0007-0542	1.981	245.434	0	2031	134.454	55.615	0.839	486.222	46387	1.302	0.768	0.915	1.72394
241	CEP19_KAN503-27_1.tif:0008-0561	1.352	91.039	0	729	86.575	57.459	0.966	123.099	11744	1.1	0.909	0.97	0.436458
242	CEP19_KAN503-27_1.tif:0009-0630	1.205	142.504	0	800	100.596	64.543	0.908	171.777	16388	1.042	0.96	0.975	0.609049
243	CEP19_KAN503-27_1.tif:0010-0906	1.153	37.864	0	219	132.593	92.767	0.98	43.657	4165	1.181	0.847	0.965	0.154789
244	CEP19_KAN503-27_1.tif:0011-0919	1.363	126	0	638	119.291	94.118	0.935	171.693	16380	1.081	0.925	0.929	0.608752
245	CEP19_KAN503-27_1.tif:0012-0924	1.247	139.067	0	1414	2.689	94.649	0.956	173.464	16549	1.102	0.908	0.964	0.615032
246	CEP19_KAN503-27_1.tif:0013-0931	1.048	43.64	0	125	62.409	95.299	0.962	45.743	4364	1.102	0.908	0.962	0.162185
247	CEP19_KAN503-27_1.tif:0014-0972	1.3	160.911	0	1254	44.163	99.546	0.902	209.145	19953	1.643	0.609	0.973	0.74154
248	CEP19_KAN503-27_2.tif:0001-0175	1.3	153.048	0	710	17.155	17.951	0.902	198.925	18978	1.31	0.763	0.947	0.705305
249	CEP19_KAN503-27_2.tif:0002-0178	1.562	276.832	0	1969	78.93	18.248	0.87	432.356	41248	1.43	0.699	0.928	1.53295
250	CEP19_KAN503-27_2.tif:0003-0182	1.426	324.5	0	1478	100.008	18.715	0.926	462.585	44132	1.307	0.765	0.951	1.64014
251	CEP19_KAN503-27_2.tif:0004-0244	1.153	255.327	0	1179	25.347	24.991	0.938	294.393	28086	1.081	0.925	0.924	1.0438
252	CEP19_KAN503-27_2.tif:0005-0261	1.541	264.116	0	1817	93.518	26.748	0.913	406.958	38825	1.363	0.734	0.958	1.44291
253	CEP19_KAN503-27_2.tif:0006-0289	1.415	212.748	0	1010	60.62	29.584	0.929	301.049	28721	1.087	0.92	0.975	1.0674
254	CEP19_KAN503-27_2.tif:0007-0337	1.488	342.479	0	2096	126.704	34.502	0.941	509.754	48632	1.148	0.871	0.966	1.80738
255	CEP19_KAN503-27_2.tif:0008-0412	1.75	263.754	0	1583	115.217	42.178	0.941	461.694	44047	1.134	0.882	0.949	1.63698
256	CEP19_KAN503-27_2.tif:0009-0426	1.426	238.051	0	1274	113.072	43.583	0.951	339.35	32375	1.084	0.922	0.954	1.2032
257	CEP19_KAN503-27_2.tif:0010-0504	1.195	273.491	0	1244	73.598	51.639	0.972	326.803	31178	1.096	0.913	0.938	1.15871
258	CEP19_KAN503-27_2.tif:0011-0599	1.541	212.599	0	1196	42.933	61.378	0.938	327.579	31252	1.014	0.986	0.945	1.16146
259	CEP19_KAN503-27_2.tif:0012-0790	1.195	278.904	0	1682	81.756	80.955	0.874	333.271	31795	1.033	0.968	0.97	1.18164
260	CEP19_KAN503-27_2.tif:0013-0875	1.845	210.972	0	1251	136.45	89.61	0.863	389.202	37131	1.231	0.813	0.91	1.37995
261	CEP19_KAN503-27_2.tif:0014-0903	1.006	177.396	0	872	30.604	92.503	1	178.506	17030	1.093	0.915	0.95	0.632909
262	CEP19_KAN503-27_2.tif:0015-0960	1.698	272.957	0	1830	115.173	98.243	0.96	463.497	44219	1.14	0.878	0.947	1.64337
263	CEP19_KAN503-27_3.tif:0001-0214	1.436	262.307	0	1691	135.858	21.956	0.932	376.676	35936	1.088	0.919	0.948	1.33554
264	CEP19_KAN503-27_3.tif:0002-0233	1.31	287.032	0	1706	45.027	23.933	0.828	376.079	35879	1.393	0.718	0.923	1.33342
265	CEP19_KAN503-27_3.tif:0003-0237	1.373	213.046	0	1180	75.375	24.37	0.892	292.538	27909	1.296	0.772	0.949	1.03722
266	CEP19_KAN503-27_3.tif:0004-0396	0.933	126.281	0	530	52.937	40.532	0.927	117.806	11239	1.493	0.67	0.967	0.41769
267	CEP19_KAN503-27_3.tif:0005-0480	1.101	226.81	0	1452	71.616	49.203	0.907	249.625	23815	1.094	0.914	0.942	0.885068
268	CEP19_KAN503-27_3.tif:0006-0505	1.184	330.221	0	1627	96.402	51.727	0.892	391.131	37315	1.033	0.968	0.97	1.38679
269	CEP19_KAN503-27_3.tif:0007-0604	1.499	170.713	0	1040	101.783	61.829	0.989	255.883	24412	1.181	0.847	0.95	0.907256
270	CEP19_KAN503-27_3.tif:0008-0672	1.551	211.264	0	1119	8.244	68.768	0.91	327.736	31267	1.36	0.735	0.931	1.16202
271	CEP19_KAN503-27_3.tif:0009-0672	1.457	216.691	0	1864	126.664	68.764	0.911	315.714	30120	1.398	0.715	0.939	1.11939
272	CEP19_KAN503-27_3.tif:0010-0810	1.583	261.503	0	1592	140.763	82.963	0.953	413.897	39487	1.148	0.871	0.938	1.46751
273	CEP19_KAN503-27_3.tif:0011-0813	0.849	317.543	0	1282	14.429	83.288	0.917	269.604	25721	1.278	0.783	0.959	0.955904
274	CEP19_KAN503-27_4.tif:0001-0084	1.52	291.276	0	2104	49.164	8.647	0.878	442.701	42235	1.452	0.689	0.942	1.56964
275	CEP19_KAN503-27_4.tif:0002-0280	1.436	70.438	0	505	104.847	28.655	0.922	101.15	9650	1.192	0.839	0.923	0.358636
276	CEP19_KAN503-27_4.tif:0003-0377	1.111	222.66	0	1403	13.386	38.667	0.862	247.393	23602	1.038	0.963	0.938	0.877152
277	CEP19_KAN503-27_4.tif:0004-0412	1.132	233.463	0	1295	33.6	42.167	0.905	264.29	25214	1.24	0.806	0.96	0.937061
278	CEP19_KAN503-27_4.tif:0005-0487	1.677	168.775	0	1412	126.062	49.835	0.871	283.052	27004	1.122	0.891	0.891	1.00359
279	CEP19_KAN503-27_4.tif:0006-0493	1.048	164.07	0	766	61.143	50.483	0.962	171.976	16407	1.147	0.872	0.962	0.609755
280	CEP19_KAN503-27_4.tif:0007-0537	1.342	212.984	0	1687	81.498	54.97	0.958	285.756	27262	1.052	0.95	0.952	1.01317
281	CEP19_KAN503-27_4.tif:0008-0879	1.824	200.759	0	1575	121.214	90	0.853	366.152	34932	1.526	0.655	0.916	1.29822
282	CEP19_KAN503-27_4.tif:0009-0890	0.912	389.207	0	964	126.893	91.177	0.907	354.926	33861	1.429	0.7	0.946	1.25842
283	CEP19_KAN503-27_4.tif:0010-0900	1.509	233.347	0	1836	23.143	92.147	0.85	352.211	33602	1.307	0.765	0.935	1.2488
284	CEP19_KAN503-27_4.tif:0011-1031	0.933	329.551	0	1373	24.301	105.552	0.927	307.433	29330	1.069	0.935	0.947	1.09003
285	CEP19_KAN503-27_5.tif:0001-0035	1.478	180.674	0	1422	27.489	3.607	0.845	267.025	25475	1.549	0.646	0.919	0.946761
286	CEP19_KAN503-27_5.tif:0002-0175	1.52	241.276	0	1335	46.758	17.973	0.925	366.708	34985	1.178	0.849	0.945	1.30019
287	CEP19_KAN503-27_5.tif:0003-0242	1.467	119.614	0	846	75.428	24.83	0.979	175.529	16746	1.111	0.9	0.962	0.622354
288	CEP19_KAN503-27_5.tif:0004-0275	1.803	228.605	0	1913	121.059	28.101	0.892	412.147	39320	1.292	0.774	0.942	1.4613
289	CEP19_KAN503-27_5.tif:0005-0379	1.52	223.766	0	1604	81.673	38.842	0.901	340.094	32446	1.201	0.833	0.939	1.20583
290	CEP19_KAN503-27_5.tif:0006-0394	1.122	176.682	0	914	4.899	40.43	0.885	198.16	18905	1.208	0.828	0.918	0.702592
291	CEP19_KAN503-27_5.tif:0007-0541	1.656	311.367	0	2063	26.993	55.468	0.947	515.666	49196	1.123	0.891	0.955	1.82834
292	CEP19_KAN503-27_5.tif:0008-0597	1.803	230.953	0	1900	62.142	61.152	0.843	416.381	39724	1.364	0.733	0.922	1.47632
293	CEP19_KAN503-27_5.tif:0009-0647	1.111	260.915	0	1413	90.713	66.207	0.916	289.897	27657	1.185	0.844	0.951	1.02785
294	CEP19_KAN503-27_5.tif:0010-0669	1.614	190.636	0	1489	128.426	68.515	0.923	307.726	29358	1.076	0.929	0.939	1.09107
295	CEP19_KAN503-27_5.tif:0011-0739	1.394	275.872	0	1999	103.685	75.694	0.867	384.59	36691	1.093	0.915	0.964	1.3636
296	CEP19_KAN503-27_5.tif:0012-0979	1.541	239.646	0	1882	61.875	100.322	0.859	369.255	35228	1.314	0.761	0.925	1.30922
297	CEP19_KAN503-27_5.tif:0013-0993	1.143	117.532	0	476	130.431	101.669	0.971	134.283	12811	1.224	0.817	0.956	0.476112
298	CEP19_KAN503-27_6.tif:0001-0048	1.845	292.716	0	2120	107.943	4.867	0.863	540.004	51518	1.386	0.722	0.924	1.91463
299	CEP19_KAN503-27_6.tif:0002-0054	1.363	204.5	0	1391	94.648	5.525	0.885	278.66	26585	1.376	0.727	0.932	0.988014
300	CEP19_KAN503-27_6.tif:0003-0104	1.268	155.488	0	768	137.263	10.706	0.917	197.206	18814	1.145	0.873	0.968	0.69921
301	CEP19_KAN503-27_6.tif:0004-0137	1.132	186.667	0	1222	12.926	13.985	0.867	211.314	20160	1.593	0.628	0.931	0.749233
302	CEP19_KAN503-27_6.tif:0005-0165	1.436	304.044	0	1912	20.725	16.884	0.932	436.611	41654	1.181	0.847	0.948	1.54804
303	CEP19_KAN503-27_6.tif:0006-0236	1.394	227.579	0	1585	82.587	24.147	0.957	317.265	30268	1.159	0.863	0.95	1.12489
304	CEP19_KAN503-27_6.tif:0007-0346	1.342	258.859	0	1862	64.1	35.479	0.931	347.306	33134	1.169	0.855	0.962	1.2314
305	CEP19_KAN503-27_6.tif:0008-0357	1.268	198.785	0	1108	45.162	36.567	0.856	252.12	24053	1.515	0.66	0.942	0.893914
306	CEP19_KAN503-27_6.tif:0009-0394	1.289	536.309	0	3281	124.323	40.411	0.837	691.446	65966	1.531	0.653	0.911	2.45158
307	CEP19_KAN503-27_6.tif:0010-0470	1.352	235.047	0	1203	5.1	48.136	0.966	317.82	30321	1.041	0.96	0.963	1.12686
308	CEP19_KAN503-27_6.tif:0011-0536	1.499	182.818	0	1175	122.371	54.898	0.937	274.027	26143	1.051	0.951	0.935	0.971587
309	CEP19_KAN503-27_6.tif:0012-0547	1.111	167.953	0	979	16.111	56	0.944	186.609	17803	1.221	0.819	0.955	0.661637
310	CEP19_KAN503-27_6.tif:0013-0608	1.205	911.87	0	3625	37.925	62.291	0.908	1099.18	104865	1.123	0.89	0.979	3.89724
311	CEP19_KAN503-27_6.tif:0014-0668	1.635	230.955	0	1977	66.879	68.452	0.911	377.651	36029	1.451	0.689	0.954	1.33899
312	CEP19_KAN503-27_6.tif:0015-0723	0.954	77.231	0	263	30.458	74.073	0.981	73.667	7028	1.24	0.807	0.968	0.261191
313	CEP19_KAN503-27_6.tif:0016-0794	1.059	244.426	0	1250	103.818	81.346	0.912	258.766	24687	1.387	0.721	0.976	0.917476
314	CEP19_KAN503-27_6.tif:0017-0799	1.216	77.836	0	291	9.495	81.861	0.905	94.641	9029	1.185	0.844	0.943	0.335557
										30791.6				1.14435

## Sheet: Replicate3
	Label	Area	Mean	Min	Max	X	Y	Circ	IntDen	RawIntDen	AR	Round	Solidity						Label	Area	Mean	Min	Max	X	Y	Circ	IntDen	RawIntDen	AR	Round	Solidity
315	CEP19_KAN503-28_1.tif:0001-0026	1.656	451.608	0	3440	120.584	2.734	0.878	747.923	71354	1.307	0.765	0.943	2.07336
316	CEP19_KAN503-28_1.tif:0002-0039	1.153	102.6	0	588	82.93	4.01	0.95	118.298	11286	1.199	0.834	0.965	0.327942
317	CEP19_KAN503-28_1.tif:0003-0084	1.887	202.906	0	1368	41.544	8.686	0.827	382.829	36523	1.207	0.828	0.872	1.06126
318	CEP19_KAN503-28_1.tif:0004-0155	1.509	278.403	0	1748	78.056	15.917	0.919	420.218	40090	1.039	0.962	0.935	1.16491
319	CEP19_KAN503-28_1.tif:0005-0333	1.059	165.376	0	645	61.867	34.102	0.941	175.078	16703	1.186	0.843	0.971	0.485346
320	CEP19_KAN503-28_1.tif:0006-0372	1.394	294.556	0	2295	31.752	38.097	0.905	410.637	39176	1.155	0.866	0.927	1.13835
321	CEP19_KAN503-28_1.tif:0007-0400	1.426	273.544	0	1981	78.844	41.029	0.926	389.946	37202	1.1	0.909	0.944	1.08099
322	CEP19_KAN503-28_1.tif:0008-0506	1.709	169.399	0	1201	128.201	51.835	0.887	289.425	27612	1.328	0.753	0.929	0.802333
323	CEP19_KAN503-28_1.tif:0009-0609	1.583	172.702	0	1289	43.753	62.347	0.891	273.346	26078	1.191	0.839	0.962	0.757759
324	CEP19_KAN503-28_1.tif:0010-0637	1.384	167.75	0	1331	13.65	65.209	0.977	232.1	22143	1.126	0.888	0.943	0.643418
325	CEP19_KAN503-28_1.tif:0011-0673	1.289	258.789	0	1755	121.785	68.918	0.895	333.648	31831	1.262	0.792	0.946	0.924927
326	CEP19_KAN503-28_1.tif:0012-0901	1.541	213.837	0	1131	92.667	92.221	0.913	329.487	31434	1.19	0.84	0.948	0.913391
327	CEP19_KAN503-28_1.tif:0013-1001	1.153	137.118	0	792	32.419	102.461	0.91	158.098	15083	1.133	0.882	0.921	0.438273
328	CEP19_KAN503-28_2.tif:0001-0170	1.75	372.293	0	2903	94.917	17.398	0.855	651.689	62173	1.394	0.717	0.938	1.80659
329	CEP19_KAN503-28_2.tif:0002-0238	1.478	355.688	0	2415	27.436	24.333	0.899	525.686	50152	1.276	0.784	0.925	1.45729
330	CEP19_KAN503-28_2.tif:0003-0363	1.237	265.051	0	1488	60.213	37.209	0.948	327.831	31276	1.134	0.882	0.952	0.9088
331	CEP19_KAN503-28_2.tif:0004-0439	1.384	226.947	0	1907	129.03	44.937	0.961	314.005	29957	1.032	0.969	0.971	0.870473
332	CEP19_KAN503-28_2.tif:0005-0634	1.373	296.229	0	1936	87.288	64.903	0.916	406.759	38806	1.308	0.765	0.949	1.1276
333	CEP19_KAN503-28_2.tif:0006-0718	1.467	263.536	0	1615	2.504	73.529	0.927	386.728	36895	1.14	0.877	0.952	1.07207
334	CEP19_KAN503-28_2.tif:0007-0761	1.132	125.065	0	753	128.737	77.986	0.905	141.578	13507	1.125	0.888	0.952	0.392479
335	CEP19_KAN503-28_2.tif:0008-0873	1.384	273.083	0	1527	29.348	89.412	0.934	377.84	36047	1.108	0.902	0.964	1.04743
336	CEP19_KAN503-28_2.tif:0009-0957	1.394	282.586	0	2252	81.774	97.98	0.957	393.95	37584	1.147	0.872	0.953	1.09209
337	CEP19_KAN503-28_3.tif:0001-0043	1.75	313.617	0	2263	114.341	4.384	0.896	548.977	52374	1.135	0.881	0.936	1.52185
338	CEP19_KAN503-28_3.tif:0002-0069	1.237	293.415	0	1728	23.232	7.144	0.948	362.913	34623	1.107	0.904	0.959	1.00605
339	CEP19_KAN503-28_3.tif:0003-0119	1.247	434.311	0	2406	77.833	12.173	0.973	541.734	51683	1.054	0.949	0.941	1.50177
340	CEP19_KAN503-28_3.tif:0004-0160	1.446	219.312	0	1474	64.95	16.437	0.929	317.233	30265	1.08	0.926	0.932	0.879423
341	CEP19_KAN503-28_3.tif:0005-0229	1.478	192.723	0	1209	100.164	23.462	0.924	284.834	27174	1.386	0.721	0.943	0.789606
342	CEP19_KAN503-28_3.tif:0006-0288	1.384	224.955	0	1271	57.891	29.549	0.888	311.248	29694	1.114	0.898	0.898	0.862831
343	CEP19_KAN503-28_3.tif:0007-0314	1.363	185.562	0	1322	21.624	32.182	0.885	252.854	24123	1.178	0.849	0.929	0.700952
344	CEP19_KAN503-28_3.tif:0008-0418	1.625	356.548	0	2792	83.794	42.747	0.929	579.28	55265	1.264	0.791	0.954	1.60586
345	CEP19_KAN503-28_3.tif:0009-0500	1.467	295.386	0	1755	108.576	51.169	0.953	433.467	41354	1.14	0.878	0.962	1.20164
346	CEP19_KAN503-28_3.tif:0010-0715	1.279	178.926	0	882	77.801	73.185	0.968	228.809	21829	1.002	0.998	0.946	0.634294
347	CEP19_KAN503-28_3.tif:0011-0843	1.352	313.45	0	2072	10.208	86.332	0.939	423.834	40435	1.075	0.93	0.956	1.17494
348	CEP19_KAN503-28_3.tif:0012-0931	1.457	402.827	0	2542	96.658	95.373	0.921	586.911	55993	1.264	0.791	0.959	1.62701
349	CEP19_KAN503-28_4.tif:0001-0038	1.709	345.656	0	2306	120.194	3.888	0.919	590.569	56342	1.114	0.898	0.931	1.63715
350	CEP19_KAN503-28_4.tif:0002-0073	1.656	503.728	0	3638	82.178	7.533	0.961	834.241	79589	1.171	0.854	0.938	2.31265
351	CEP19_KAN503-28_4.tif:0003-0080	1.153	300.664	0	1577	10.589	8.25	0.922	346.667	33073	1.177	0.85	0.961	0.961016
352	CEP19_KAN503-28_4.tif:0004-0099	1.509	221.868	0	1844	134.374	10.242	0.919	334.885	31949	1.055	0.948	0.95	0.928355
353	CEP19_KAN503-28_4.tif:0005-0135	0.985	125.702	0	488	26.831	13.813	0.917	123.854	11816	1.051	0.952	0.969	0.343342
354	CEP19_KAN503-28_4.tif:0006-0186	1.866	355.657	0	3193	48.929	19.079	0.881	663.575	63307	1.207	0.828	0.932	1.83954
355	CEP19_KAN503-28_4.tif:0007-0266	1.268	176.24	0	844	128.871	27.207	0.917	223.526	21325	1.099	0.91	0.964	0.619649
356	CEP19_KAN503-28_4.tif:0008-0459	1.226	274.094	0	1698	77.906	47.008	0.94	336.143	32069	1.07	0.935	0.955	0.931842
357	CEP19_KAN503-28_4.tif:0009-0675	1.761	233.518	0	1783	87.537	69.125	0.915	411.214	39231	1.264	0.791	0.933	1.13995
358	CEP19_KAN503-28_4.tif:0010-0697	1.069	211.539	0	773	2.743	71.424	0.921	226.167	21577	1.315	0.76	0.976	0.626972
359	CEP19_KAN503-28_4.tif:0011-0718	1.3	233.153	0	1800	42.508	73.556	0.928	303.041	28911	1.161	0.861	0.939	0.840079
360	CEP19_KAN503-28_4.tif:0012-0740	1.426	308.426	0	1936	122.037	75.769	0.911	439.672	41946	1.031	0.97	0.971	1.21884
361	CEP19_KAN503-28_4.tif:0013-0746	1.488	291.507	0	1884	138.426	76.369	0.906	433.886	41394	1.261	0.793	0.934	1.2028
362	CEP19_KAN503-28_4.tif:0014-0844	1.688	280.031	0	2628	103.254	86.395	0.94	472.575	45085	1.302	0.768	0.958	1.31005
363	CEP19_KAN503-28_4.tif:0015-0849	1.677	205.988	0	1665	9.022	86.951	0.925	345.461	32958	1.09	0.917	0.925	0.957674
364	CEP19_KAN503-28_4.tif:0016-0881	1.027	293.612	0	1270	30.682	90.32	0.846	301.605	28774	1.191	0.84	0.899	0.836098
365	CEP19_KAN503-28_4.tif:0017-0917	1.384	167.174	0	1190	80.009	93.929	0.934	231.303	22067	1.168	0.856	0.964	0.64121
366	CEP19_KAN503-28_4.tif:0018-0942	1.405	458.015	0	3090	136.935	96.425	0.964	643.314	61374	1.111	0.9	0.947	1.78337
367	CEP19_KAN503-28_5.tif:0001-0013	0.849	302.716	0	1227	0.662	1.324	0.886	257.015	24520	1.706	0.586	0.982	0.712488
368	CEP19_KAN503-28_5.tif:0002-0078	1.562	344.174	0	2513	117.2	7.961	0.893	537.531	51282	1.073	0.932	0.923	1.49012
369	CEP19_KAN503-28_5.tif:0003-0108	1.478	227.511	0	1365	13.674	11.099	0.899	336.248	32079	1.313	0.761	0.934	0.932133
370	CEP19_KAN503-28_5.tif:0004-0207	0.933	109	0	344	32.375	21.196	0.993	101.685	9701	1.024	0.976	0.952	0.281886
371	CEP19_KAN503-28_5.tif:0005-0324	0.954	46.604	0	232	117.82	33.197	0.651	44.454	4241	2.526	0.396	0.867	0.123233
372	CEP19_KAN503-28_5.tif:0006-0425	1.415	114.178	0	755	131.724	43.477	0.934	161.567	15414	1.218	0.821	0.928	0.447891
373	CEP19_KAN503-28_5.tif:0007-0465	1.74	238.247	0	1716	86.263	47.597	0.882	414.547	39549	1.366	0.732	0.93	1.14919
374	CEP19_KAN503-28_5.tif:0008-0489	1.394	272.624	0	1915	54.941	50.115	0.915	380.062	36259	1.194	0.838	0.967	1.05359
375	CEP19_KAN503-28_5.tif:0009-0552	1.467	283.607	0	2018	118.148	56.516	0.893	416.182	39705	1.362	0.734	0.956	1.15372
376	CEP19_KAN503-28_5.tif:0010-0722	1.038	227.141	0	1404	24.291	73.904	0.922	235.706	22487	1.324	0.755	0.966	0.653414
377	CEP19_KAN503-28_5.tif:0011-0791	1.195	335.175	0	2077	126.587	81.017	0.916	400.512	38210	1.16	0.862	0.934	1.11028
378	CEP19_KAN503-28_5.tif:0012-0820	1.321	197.675	0	1244	11.13	83.965	0.917	261.072	24907	1.096	0.912	0.955	0.723733
379	CEP19_KAN503-28_5.tif:0013-0916	1.583	306.159	0	2503	84.646	93.829	0.905	484.576	46230	1.14	0.877	0.929	1.34332
380	CEP19_KAN503-28_6.tif:0001-0076	1.688	254.783	0	2016	133.852	7.815	0.886	429.966	41020	1.344	0.744	0.925	1.19194
381	CEP19_KAN503-28_6.tif:0002-0092	1.719	220.817	0	1880	14.257	9.36	0.793	379.59	36214	1.538	0.65	0.899	1.05229
382	CEP19_KAN503-28_6.tif:0003-0093	1.153	348.845	0	2549	53.731	9.574	0.922	402.22	38373	1.071	0.933	0.965	1.11502
383	CEP19_KAN503-28_6.tif:0004-0154	1.394	129.068	0	690	29.03	15.773	0.957	179.932	17166	1.126	0.888	0.943	0.4988
384	CEP19_KAN503-28_6.tif:0005-0267	1.688	196.106	0	1427	118.781	27.36	0.864	330.944	31573	1.67	0.599	0.944	0.91743
385	CEP19_KAN503-28_6.tif:0006-0270	2.065	270.107	0	2720	85.145	27.669	0.894	557.75	53211	1.311	0.763	0.936	1.54617
386	CEP19_KAN503-28_6.tif:0007-0310	1.038	18.859	0	90	123.226	31.757	0.772	19.57	1867	1.673	0.598	0.876	0.0542502
387	CEP19_KAN503-28_6.tif:0008-0327	0.975	54.742	0	220	12.902	33.501	0.988	53.363	5091	1.171	0.854	0.93	0.147931
388	CEP19_KAN503-28_6.tif:0009-0495	1.541	329.728	0	2151	108.17	50.713	0.938	508.056	48470	1.08	0.926	0.951	1.40841
389	CEP19_KAN503-28_6.tif:0010-0593	1.3	202.129	0	1289	29.378	60.754	0.892	262.717	25064	1.288	0.776	0.915	0.728295
390	CEP19_KAN503-28_6.tif:0011-0634	1.583	287.967	0	2239	67.651	64.888	0.928	455.783	43483	1.125	0.889	0.938	1.2635
391	CEP19_KAN503-28_6.tif:0012-0644	1.656	218.5	0	1882	2.663	65.949	0.848	361.865	34523	1.352	0.739	0.913	1.00315
392	CEP19_KAN503-28_6.tif:0013-0731	1.625	195.684	0	1317	136.197	74.865	0.883	317.925	30331	1.101	0.908	0.934	0.88134
393	CEP19_KAN503-28_6.tif:0014-0734	1.845	209.625	0	1581	111.7	75.097	0.871	386.718	36894	1.32	0.758	0.946	1.07204
394	CEP19_KAN503-28_6.tif:0015-0746	0.891	137.188	0	683	28.358	76.351	0.886	122.229	11661	1.519	0.658	0.939	0.338839
395	CEP19_KAN503-28_6.tif:0016-0793	1.782	298.782	0	2378	91.919	81.285	0.861	532.405	50793	1.417	0.706	0.924	1.47591
396	CEP19_KAN503-28_6.tif:0017-0947	1.268	257.603	0	1868	11.658	97.007	0.96	326.72	31170	1.16	0.862	0.934	0.90572
										34414.6				1
397	CEP19_KAN503-29_1.tif:0001-0129	1.53	231.973	0	1523	70.138	13.184	0.931	355	33868	1.159	0.863	0.951	0.984117
398	CEP19_KAN503-29_1.tif:0002-0162	1.803	281.494	0	2357	46.187	16.657	0.892	507.5	48417	1.457	0.687	0.948	1.40687
399	CEP19_KAN503-29_1.tif:0003-0183	1.394	228.579	0	969	84.131	18.751	0.93	318.659	30401	1.112	0.899	0.943	0.883375
400	CEP19_KAN503-29_1.tif:0004-0264	1.279	100.238	0	463	134.027	27.107	0.924	128.183	12229	1.111	0.9	0.968	0.355343
401	CEP19_KAN503-29_1.tif:0005-0308	1.499	198.07	0	1232	26.094	31.507	0.857	296.888	28324	1.336	0.748	0.908	0.823022
402	CEP19_KAN503-29_1.tif:0006-0389	1.363	228.923	0	861	128.265	39.863	0.92	311.94	29760	1.016	0.984	0.963	0.864749
403	CEP19_KAN503-29_1.tif:0007-0474	1.384	182.886	0	1013	23.828	48.584	0.898	253.043	24141	1.341	0.746	0.94	0.701475
404	CEP19_KAN503-29_1.tif:0008-0685	1.048	255.97	0	889	86.701	70.159	0.932	268.304	25597	1.202	0.832	0.966	0.743783
405	CEP19_KAN503-29_1.tif:0009-0757	1.038	99.03	0	648	41.856	77.554	0.894	102.764	9804	1.369	0.73	0.961	0.284879
406	CEP19_KAN503-29_1.tif:0010-0884	1.059	229	0	1026	14.85	90.531	0.912	242.435	23129	1.329	0.753	0.971	0.672069
407	CEP19_KAN503-29_1.tif:0011-0945	1.153	426.936	0	2025	107.119	96.824	0.922	492.26	46963	1.028	0.972	0.961	1.36462
408	CEP19_KAN503-29_1.tif:0012-0993	1.09	210	0	1173	61.475	101.617	0.871	228.924	21840	1.253	0.798	0.941	0.634614
409	CEP19_KAN503-29_2.tif:0001-0083	1.646	314.376	0	2216	73.905	8.561	0.941	517.353	49357	1.166	0.857	0.943	1.43419
410	CEP19_KAN503-29_2.tif:0002-0099	1.771	325.846	0	2234	42.09	10.148	0.877	577.215	55068	1.355	0.738	0.923	1.60013
411	CEP19_KAN503-29_2.tif:0003-0116	1.478	359.028	0	2544	27.866	11.928	0.96	530.623	50623	1.135	0.881	0.966	1.47097
412	CEP19_KAN503-29_2.tif:0004-0144	1.069	57.216	0	284	67.247	14.818	0.751	61.172	5836	2.437	0.41	0.953	0.169579
413	CEP19_KAN503-29_2.tif:0005-0195	1.132	164.648	0	544	15.916	20.018	0.933	186.388	17782	1.137	0.879	0.952	0.516699
414	CEP19_KAN503-29_2.tif:0006-0330	1.111	147.009	0	860	89.204	33.834	0.975	163.339	15583	1.059	0.944	0.946	0.452802
415	CEP19_KAN503-29_2.tif:0007-0331	2.107	239.219	0	1832	135.722	33.963	0.811	503.999	48083	1.777	0.563	0.933	1.39717
416	CEP19_KAN503-29_2.tif:0008-0343	1.467	229.864	0	1567	18.817	35.147	0.903	337.317	32181	1.237	0.808	0.956	0.935097
417	CEP19_KAN503-29_2.tif:0009-0402	1.226	263.35	0	1305	39.913	41.125	0.912	322.967	30812	1.243	0.805	0.963	0.895317
418	CEP19_KAN503-29_2.tif:0010-0482	1.363	372.492	0	2918	140.173	49.33	0.895	507.574	48424	1.113	0.898	0.956	1.40708
419	CEP19_KAN503-29_2.tif:0011-0518	1.593	305.099	0	1893	87.807	53.013	0.944	486.096	46375	1.212	0.825	0.962	1.34754
420	CEP19_KAN503-29_2.tif:0012-0620	1.415	327.178	0	2204	62.889	63.52	0.894	462.973	44169	1.163	0.86	0.947	1.28344
421	CEP19_KAN503-29_2.tif:0013-0753	1.027	179.714	0	784	27.857	77.161	0.974	184.607	17612	1.114	0.897	0.951	0.511759
422	CEP19_KAN503-29_2.tif:0014-0767	1.226	114.547	0	468	141.614	78.573	0.968	140.478	13402	1.098	0.911	0.959	0.389427
423	CEP19_KAN503-29_2.tif:0015-0839	1.247	266.185	0	1888	74.552	85.994	0.819	332.023	31676	1.357	0.737	0.919	0.920423
424	CEP19_KAN503-29_2.tif:0016-0880	1.415	189.563	0	1255	30.463	90.11	0.871	268.241	25591	1.359	0.736	0.947	0.743608
425	CEP19_KAN503-29_2.tif:0017-0897	1.583	348.921	0	2355	137.901	91.852	0.928	552.258	52687	1.151	0.869	0.935	1.53095
426	CEP19_KAN503-29_3.tif:0001-0044	1.614	295.13	0	2212	64.412	4.486	0.923	476.4	45450	1.273	0.786	0.948	1.32066
427	CEP19_KAN503-29_3.tif:0002-0075	1.803	292.645	0	1981	115.792	7.643	0.97	527.604	50335	1.094	0.914	0.958	1.46261
428	CEP19_KAN503-29_3.tif:0003-0261	1.31	197.344	0	748	15.49	26.768	0.936	258.567	24668	1.24	0.807	0.951	0.716788
429	CEP19_KAN503-29_3.tif:0004-0264	1.426	182.154	0	1078	32.267	27.089	0.951	259.667	24773	1.087	0.92	0.954	0.719839
430	CEP19_KAN503-29_3.tif:0005-0310	1.782	301.947	0	2575	87.18	31.726	0.903	538.044	51331	1.277	0.783	0.921	1.49155
431	CEP19_KAN503-29_3.tif:0006-0562	1.258	277.033	0	1233	12.883	57.59	0.964	348.459	33244	1.107	0.904	0.96	0.965985
432	CEP19_KAN503-29_3.tif:0007-0650	1.845	246.08	0	2388	82.157	66.628	0.843	453.969	43310	1.509	0.662	0.917	1.25848
433	CEP19_KAN503-29_3.tif:0008-0699	1.709	295.699	0	2253	60.978	71.659	0.966	505.215	48199	1.225	0.816	0.939	1.40054
434	CEP19_KAN503-29_3.tif:0009-0869	1.75	326.826	0	2565	115.284	88.929	0.896	572.1	54580	1.33	0.752	0.954	1.58595
435	CEP19_KAN503-29_3.tif:0010-0977	1.3	212.847	0	1232	24.942	100.063	0.984	276.648	26393	1.194	0.837	0.947	0.766912
436	CEP19_KAN503-29_3.tif:0011-1015	1.279	250.418	0	1185	71.836	103.996	0.94	320.231	30551	1.356	0.738	0.942	0.887733
437	CEP19_KAN503-29_4.tif:0001-0008	1.069	788.706	0	3312	133.454	0.796	0.95	843.245	80448	1.101	0.908	0.971	2.33761
438	CEP19_KAN503-29_4.tif:0002-0064	1.446	398.87	0	2948	122.031	6.567	0.924	576.963	55044	1.004	0.996	0.982	1.59944
439	CEP19_KAN503-29_4.tif:0003-0179	1.583	182.053	0	1031	84.395	18.383	0.905	288.146	27490	1.305	0.767	0.938	0.798788
440	CEP19_KAN503-29_4.tif:0004-0277	1.73	372.139	0	2850	132.212	28.383	0.964	643.618	61403	1.108	0.903	0.965	1.78421
441	CEP19_KAN503-29_4.tif:0005-0338	1.614	327.5	0	2685	84.33	34.64	0.877	528.653	50435	1.466	0.682	0.948	1.46551
442	CEP19_KAN503-29_4.tif:0006-0373	1.457	243.46	0	1867	1.912	38.217	0.911	354.717	33841	1.345	0.744	0.939	0.983332
443	CEP19_KAN503-29_4.tif:0007-0453	1.583	275.457	0	1994	124.427	46.381	0.938	435.982	41594	1.165	0.859	0.962	1.20861
444	CEP19_KAN503-29_4.tif:0008-0468	1.289	192.203	0	952	30.06	47.968	0.948	247.802	23641	1.215	0.823	0.95	0.686946
445	CEP19_KAN503-29_4.tif:0009-0615	1.478	221.496	0	1485	49.378	62.973	0.924	327.359	31231	1.069	0.936	0.928	0.907492
446	CEP19_KAN503-29_4.tif:0010-0626	1.363	275	0	1612	80.711	64.145	0.946	374.726	35750	1.171	0.854	0.959	1.0388
447	CEP19_KAN503-29_4.tif:0011-0859	1.415	268.148	0	1639	100.077	88.004	0.929	379.443	36200	1.181	0.846	0.975	1.05188
448	CEP19_KAN503-29_4.tif:0012-0860	1.677	253.113	0	1884	16.259	88.109	0.948	424.494	40498	1.18	0.847	0.938	1.17677
449	CEP19_KAN503-29_4.tif:0013-0882	1.279	138.91	0	939	62.963	90.36	0.877	177.636	16947	1.34	0.746	0.924	0.492436
450	CEP19_KAN503-29_5.tif:0001-0123	1.709	378.215	0	2570	104.195	12.66	0.952	646.196	61649	1.113	0.898	0.962	1.79136
451	CEP19_KAN503-29_5.tif:0002-0133	1.31	462.552	0	2206	134.109	13.602	0.936	606.051	57819	1.112	0.899	0.943	1.68007
452	CEP19_KAN503-29_5.tif:0003-0147	1.226	116.641	0	682	29.509	15.016	0.828	143.046	13647	1.588	0.63	0.914	0.396547
453	CEP19_KAN503-29_5.tif:0004-0178	1.897	400.635	0	3134	60.501	18.23	0.962	760.092	72515	1.091	0.917	0.958	2.1071
454	CEP19_KAN503-29_5.tif:0005-0439	1.709	407.89	0	3007	100.062	44.944	0.884	696.897	66486	1.098	0.911	0.95	1.93191
455	CEP19_KAN503-29_5.tif:0006-0463	1.541	201.306	0	1433	57.144	47.414	0.928	310.179	29592	1.43	0.699	0.939	0.859867
456	CEP19_KAN503-29_5.tif:0007-0497	1.426	337.949	0	1846	123.514	50.881	0.951	481.757	45961	1.077	0.929	0.951	1.33551
457	CEP19_KAN503-29_5.tif:0008-0515	1.782	271.712	0	2447	6.204	52.705	0.842	484.168	46191	1.538	0.65	0.939	1.34219
458	CEP19_KAN503-29_5.tif:0009-0536	1.006	663.083	0	2809	112.573	54.932	0.936	667.233	63656	1.222	0.818	0.985	1.84968
459	CEP19_KAN503-29_5.tif:0010-0614	1.771	278.337	0	2734	38.211	62.959	0.802	493.056	47039	1.805	0.554	0.887	1.36683
460	CEP19_KAN503-29_5.tif:0011-0706	1.426	309.647	0	1899	97.464	72.344	0.951	441.412	42112	1.122	0.891	0.944	1.22367
461	CEP19_KAN503-29_5.tif:0012-0733	1.394	294.353	0	1599	49.669	75.037	0.93	410.354	39149	1.229	0.814	0.95	1.13757
462	CEP19_KAN503-29_5.tif:0013-0813	1.887	255.917	0	1659	76.475	83.228	0.882	482.847	46065	1.381	0.724	0.935	1.33853
463	CEP19_KAN503-29_5.tif:0014-0854	1.184	171.106	0	735	126.653	87.492	0.908	202.667	19335	1.115	0.897	0.942	0.561825
464	CEP19_KAN503-29_6.tif:0001-0040	1.551	191.128	0	852	125.82	4.107	0.969	296.5	28287	1.181	0.847	0.955	0.821947
465	CEP19_KAN503-29_6.tif:0002-0199	1.771	412.746	0	3167	106.672	20.358	0.865	731.152	69754	1.199	0.834	0.939	2.02687
466	CEP19_KAN503-29_6.tif:0003-0217	1.593	256.026	0	2119	39.347	22.221	0.934	407.912	38916	1.301	0.769	0.95	1.1308
467	CEP19_KAN503-29_6.tif:0004-0285	1.237	89.492	0	303	27.353	29.207	0.976	110.688	10560	1.096	0.913	0.963	0.306846
468	CEP19_KAN503-29_6.tif:0005-0368	1.279	348.623	0	2062	126.771	37.741	0.951	445.814	42532	1.114	0.898	0.972	1.23587
469	CEP19_KAN503-29_6.tif:0006-0397	1.876	281.564	0	2162	116.361	40.678	0.975	528.286	50400	1.131	0.884	0.95	1.46449
470	CEP19_KAN503-29_6.tif:0007-0437	1.887	336.778	0	3021	97.795	44.717	0.835	635.41	60620	1.491	0.671	0.902	1.76146
471	CEP19_KAN503-29_6.tif:0008-0499	1.268	226.769	0	1270	38.734	51.14	0.833	287.612	27439	1.389	0.72	0.938	0.797306
472	CEP19_KAN503-29_6.tif:0009-0735	1.394	369.624	0	2221	76.474	75.252	0.941	515.288	49160	1.113	0.898	0.967	1.42846
473	CEP19_KAN503-29_6.tif:0010-0811	1.551	261.905	0	1645	25.863	83.072	0.864	406.298	38762	1.086	0.921	0.908	1.12632
474	CEP19_KAN503-29_6.tif:0011-0945	1.635	377.167	0	2781	117.18	96.767	0.911	616.732	58838	1.274	0.785	0.945	1.70968
475	CEP19_KAN503-29_6.tif:0012-0986	1.415	317.993	0	1731	88.492	100.921	0.871	449.976	42929	1.341	0.746	0.954	1.24741
										38689.9				1.12423
476	CEP19_KAN503-30_1.tif:0001-0146	1.415	334.074	0	1636	71.782	14.967	0.894	472.732	45100	1.304	0.767	0.944	1.31049
477	CEP19_KAN503-30_1.tif:0002-0172	1.153	425.082	0	2535	27.358	17.617	0.922	490.121	46759	1.231	0.813	0.961	1.3587
478	CEP19_KAN503-30_1.tif:0003-0218	1.478	394.39	0	1479	36.176	22.39	0.89	582.886	55609	1.286	0.777	0.91	1.61585
479	CEP19_KAN503-30_1.tif:0004-0277	1.394	436.647	0	2758	141.131	28.368	0.957	608.723	58074	1.102	0.908	0.94	1.68748
480	CEP19_KAN503-30_1.tif:0005-0398	1.31	273.336	0	1528	53.773	40.782	0.91	358.134	34167	1.242	0.805	0.94	0.992805
481	CEP19_KAN503-30_1.tif:0006-0398	1.373	348.87	0	2248	80.654	40.794	0.877	479.042	45702	1.241	0.806	0.96	1.32798
482	CEP19_KAN503-30_1.tif:0007-0522	1.08	358.252	0	1783	5.509	53.454	0.89	386.781	36900	1.447	0.691	0.945	1.07222
483	CEP19_KAN503-30_1.tif:0008-0776	1.153	294.109	0	1609	70.906	79.449	0.967	339.109	32352	1.134	0.882	0.936	0.940066
484	CEP19_KAN503-30_1.tif:0009-0845	0.87	144.988	0	681	46.324	86.48	0.908	126.139	12034	1.136	0.881	0.965	0.349677
485	CEP19_KAN503-30_1.tif:0010-0938	1.038	351.465	0	1247	133.969	96.109	0.855	364.716	34795	1.358	0.737	0.9	1.01105
486	CEP19_KAN503-30_2.tif:0001-0087	1.761	304.22	0	2638	118.444	8.952	0.88	535.717	51109	1.205	0.83	0.941	1.4851
487	CEP19_KAN503-30_2.tif:0002-0092	1.415	226.948	0	1784	13.632	9.361	0.919	321.143	30638	1.204	0.83	0.944	0.890261
488	CEP19_KAN503-30_2.tif:0003-0106	1.509	226.861	0	2072	81.324	10.916	0.929	342.421	32668	1.123	0.891	0.966	0.949248
489	CEP19_KAN503-30_2.tif:0004-0164	1.405	349.455	0	2542	48.332	16.854	0.912	490.834	46827	1.264	0.791	0.947	1.36067
490	CEP19_KAN503-30_2.tif:0005-0347	1.908	314	0	2695	135.332	35.482	0.88	599.017	57148	1.435	0.697	0.958	1.66057
491	CEP19_KAN503-30_2.tif:0006-0382	1.656	274.297	0	2219	79.94	39.103	0.891	454.273	43339	1.35	0.74	0.924	1.25932
492	CEP19_KAN503-30_2.tif:0007-0415	1.394	206.083	0	1155	114.705	42.524	0.941	287.297	27409	1.202	0.832	0.974	0.796435
493	CEP19_KAN503-30_2.tif:0008-0558	1.226	290.333	0	1511	45.449	57.214	0.94	356.058	33969	1.12	0.893	0.947	0.987051
494	CEP19_KAN503-30_2.tif:0009-0567	1.205	217.704	0	1143	64.736	58.048	0.924	262.424	25036	1.367	0.731	0.947	0.727481
495	CEP19_KAN503-30_2.tif:0010-0603	1.572	290.293	0	2018	78.208	61.732	0.908	456.422	43544	1.291	0.774	0.952	1.26528
496	CEP19_KAN503-30_2.tif:0011-0674	1.342	280.562	0	1761	12.649	69.023	0.881	376.425	35912	1.251	0.8	0.952	1.04351
497	CEP19_KAN503-30_2.tif:0012-0785	1.509	206.056	0	1036	118.063	80.339	0.943	311.018	29672	1.224	0.817	0.96	0.862192
498	CEP19_KAN503-30_2.tif:0013-0921	1.405	166.739	0	877	61.587	94.349	0.948	234.196	22343	1.17	0.855	0.971	0.64923
499	CEP19_KAN503-30_2.tif:0014-0920	1.132	160.315	0	872	87.234	94.27	0.878	181.483	17314	1.223	0.818	0.956	0.5031
500	CEP19_KAN503-30_2.tif:0015-0972	1.352	428.132	0	2088	111.554	99.546	0.939	578.903	55229	1.239	0.807	0.966	1.60481
501	CEP19_KAN503-30_2.tif:0016-1006	1.436	334.029	0	2375	24.271	103.048	0.907	479.671	45762	1.152	0.868	0.948	1.32973
502	CEP19_KAN503-30_3.tif:0001-0134	1.656	406.348	0	3693	109.981	13.701	0.947	672.967	64203	1.091	0.916	0.952	1.86557
503	CEP19_KAN503-30_3.tif:0002-0189	1.719	409.018	0	2782	55.811	19.321	0.925	703.113	67079	1.125	0.889	0.937	1.94914
504	CEP19_KAN503-30_3.tif:0003-0382	1.509	306.778	0	2092	87.804	39.099	0.895	463.047	44176	1.245	0.803	0.938	1.28364
505	CEP19_KAN503-30_3.tif:0004-0415	1.226	256.923	0	1113	46.931	42.479	0.912	315.085	30060	1.147	0.872	0.951	0.873466
506	CEP19_KAN503-30_3.tif:0005-0478	1.216	344.879	0	2064	34.143	48.971	0.905	419.337	40006	1.176	0.85	0.951	1.16247
507	CEP19_KAN503-30_3.tif:0006-0556	1.467	284.564	0	1672	128.975	56.912	0.893	417.587	39839	1.356	0.737	0.943	1.15762
508	CEP19_KAN503-30_3.tif:0007-0623	1.331	365.843	0	2722	17.025	63.795	0.951	487.008	46462	1.024	0.976	0.955	1.35007
509	CEP19_KAN503-30_3.tif:0008-0821	1.352	305.597	0	1850	113.027	84.045	0.994	413.216	39422	1.112	0.899	0.963	1.1455
510	CEP19_KAN503-30_3.tif:0009-0839	1.216	279.75	0	1891	69.315	85.98	0.932	340.147	32451	1.131	0.884	0.951	0.942942
511	CEP19_KAN503-30_4.tif:0001-0050	1.53	367.192	0	3019	42.581	5.131	0.907	561.932	53610	1.217	0.822	0.945	1.55777
512	CEP19_KAN503-30_4.tif:0002-0053	1.017	78.031	0	217	2.326	5.416	0.933	79.337	7569	1.143	0.875	0.951	0.219936
513	CEP19_KAN503-30_4.tif:0003-0081	1.143	283.596	0	1321	80.313	8.297	0.897	324.015	30912	1.103	0.907	0.995	0.898223
514	CEP19_KAN503-30_4.tif:0004-0204	1.488	358.627	0	2493	121.442	20.831	0.93	533.789	50925	1.18	0.847	0.947	1.47975
515	CEP19_KAN503-30_4.tif:0005-0288	1.384	281.25	0	2070	79.742	29.446	0.874	389.139	37125	1.347	0.743	0.946	1.07876
516	CEP19_KAN503-30_4.tif:0006-0343	1.415	409.593	0	2044	103.792	35.164	0.971	579.594	55295	1.095	0.913	0.954	1.60673
517	CEP19_KAN503-30_4.tif:0007-0432	1.331	372.606	0	1890	65.119	44.225	1	496.012	47321	1.116	0.896	0.962	1.37503
518	CEP19_KAN503-30_4.tif:0008-0580	1.3	239.274	0	1567	11.728	59.432	0.844	310.997	29670	1.484	0.674	0.912	0.862134
519	CEP19_KAN503-30_4.tif:0009-0666	1.268	295.058	0	1646	82.321	68.245	0.891	374.223	35702	1.187	0.842	0.957	1.03741
520	CEP19_KAN503-30_4.tif:0010-0802	1.583	391.225	0	2751	135.923	82.058	0.882	619.216	59075	1.2	0.833	0.924	1.71657
521	CEP19_KAN503-30_4.tif:0011-0804	1.132	247.398	0	1060	45.722	82.365	0.933	280.065	26719	1.088	0.92	0.947	0.776385
522	CEP19_KAN503-30_4.tif:0012-0963	1.415	201.585	0	1319	111.085	98.566	0.929	285.253	27214	1.049	0.953	0.975	0.790769
523	CEP19_KAN503-30_4.tif:0013-0982	1.446	364.928	0	2421	71.354	100.574	0.939	527.866	50360	1.134	0.882	0.955	1.46333
524	CEP19_KAN503-30_5.tif:0001-0132	1.646	224.465	0	1362	21.786	13.487	0.941	369.391	35241	1.11	0.901	0.952	1.02401
525	CEP19_KAN503-30_5.tif:0002-0253	1.342	351.711	0	2270	95.629	25.97	0.931	471.883	45019	1.229	0.813	0.955	1.30814
526	CEP19_KAN503-30_5.tif:0003-0319	1.436	278.555	0	1740	39.022	32.72	0.958	400.009	38162	1.22	0.82	0.965	1.10889
527	CEP19_KAN503-30_5.tif:0004-0419	1.583	312.894	0	2456	89.208	42.903	0.905	495.236	47247	1.216	0.822	0.926	1.37288
528	CEP19_KAN503-30_5.tif:0005-0444	1.111	252.019	0	1367	16.419	45.464	0.877	280.012	26714	1.524	0.656	0.922	0.77624
529	CEP19_KAN503-30_5.tif:0006-0588	1.289	359.87	0	2160	118.682	60.2	0.976	463.969	44264	1.012	0.988	0.943	1.2862
530	CEP19_KAN503-30_5.tif:0007-0814	1.268	316.95	0	1373	51.454	83.383	0.78	401.99	38351	1.543	0.648	0.89	1.11438
531	CEP19_KAN503-30_5.tif:0008-0826	1.426	291.824	0	1343	93.238	84.57	0.901	416.004	39688	1.346	0.743	0.951	1.15323
532	CEP19_KAN503-30_5.tif:0009-0830	1.258	211.175	0	1249	16.651	85.015	0.936	265.621	25341	1.14	0.877	0.968	0.736344
533	CEP19_KAN503-30_5.tif:0010-0912	1.562	334.805	0	2117	110.969	93.368	0.95	522.898	49886	1.251	0.799	0.955	1.44956
534	CEP19_KAN503-30_5.tif:0011-0939	1.426	272.868	0	1976	72.574	96.139	0.951	388.982	37110	1.148	0.871	0.958	1.07832
535	CEP19_KAN503-30_5.tif:0012-1001	1.321	309.278	0	1937	31.385	102.535	0.943	408.468	38969	1.244	0.804	0.951	1.13234
536	CEP19_KAN503-30_6.tif:0001-0023	1.3	521.605	0	2929	54.545	2.317	0.928	677.956	64679	1.14	0.877	0.95	1.8794
537	CEP19_KAN503-30_6.tif:0002-0059	1.048	400.45	0	1969	10.475	6.05	0.932	419.746	40045	1.149	0.87	0.962	1.1636
538	CEP19_KAN503-30_6.tif:0003-0109	1.52	265.117	0	1653	105.057	11.156	0.925	402.944	38442	1.304	0.767	0.954	1.11703
539	CEP19_KAN503-30_6.tif:0004-0166	1.583	357.404	0	1856	85.882	16.964	0.914	565.685	53968	1.149	0.87	0.962	1.56817
540	CEP19_KAN503-30_6.tif:0005-0396	0.933	489.966	0	1215	139.182	40.548	0.909	457.082	43607	1.115	0.897	0.994	1.26711
541	CEP19_KAN503-30_6.tif:0006-0441	1.499	279.455	0	1935	24.011	45.179	0.937	418.876	39962	1.232	0.812	0.947	1.16119
542	CEP19_KAN503-30_6.tif:0007-0470	1.426	356.647	0	2261	60.235	48.051	0.823	508.412	48504	1.255	0.797	0.916	1.4094
543	CEP19_KAN503-30_6.tif:0008-0672	1.436	227.19	0	1419	84.095	68.785	0.907	326.248	31125	1.23	0.813	0.948	0.904412
544	CEP19_KAN503-30_6.tif:0009-0709	1.373	397.794	0	2244	111.095	72.599	0.953	546.22	52111	1.016	0.985	0.963	1.51421
545	CEP19_KAN503-30_6.tif:0010-0831	1.688	486.05	0	3684	134.648	85.159	0.877	820.247	78254	1.241	0.806	0.899	2.27386
546	CEP19_KAN503-30_6.tif:0011-0892	1.279	212.115	0	1081	71.53	91.372	0.913	271.25	25878	1.304	0.767	0.938	0.751948
547	CEP19_KAN503-30_6.tif:0012-0963	1.446	206.246	0	1228	30.775	98.577	0.965	298.335	28462	1.089	0.919	0.955	0.827032
										40633.8				1.18071
548	CEP19_KAN503-31_1.tif:0001-0092	1.342	115.195	0	818	12.725	9.479	0.871	154.555	14745	1.287	0.777	0.914	0.428452
549	CEP19_KAN503-31_1.tif:0002-0129	1.761	219.345	0	1972	36.688	13.25	0.924	386.257	36850	1.318	0.759	0.957	1.07077
550	CEP19_KAN503-31_1.tif:0003-0255	1.667	299.83	0	1934	78.27	26.093	0.883	499.702	47673	1.246	0.802	0.949	1.38525
551	CEP19_KAN503-31_1.tif:0004-0378	1.709	193.356	0	1352	26.912	38.764	0.846	330.357	31517	1.513	0.661	0.913	0.915803
552	CEP19_KAN503-31_1.tif:0005-0499	1.321	262.31	0	1558	72.417	51.114	0.943	346.436	33051	1.052	0.95	0.958	0.960377
553	CEP19_KAN503-31_1.tif:0006-0535	1.782	157.959	0	1015	118.92	54.81	0.882	281.469	26853	1.295	0.772	0.934	0.780279
554	CEP19_KAN503-31_1.tif:0007-0546	1.342	162.711	0	1135	9.234	55.879	0.931	218.306	20827	1.017	0.983	0.955	0.605179
555	CEP19_KAN503-31_1.tif:0008-0570	1.321	180.024	0	1132	22.925	58.411	0.943	237.76	22683	1.172	0.854	0.955	0.659109
556	CEP19_KAN503-31_1.tif:0009-0684	1.258	186.475	0	787	25.859	70.137	0.817	234.553	22377	1.497	0.668	0.899	0.650218
557	CEP19_KAN503-31_1.tif:0010-0735	1.509	393.556	0	3067	138.297	75.196	0.895	594.028	56672	1.282	0.78	0.947	1.64674
558	CEP19_KAN503-31_1.tif:0011-0831	1.499	249.783	0	1787	20.512	85.083	0.947	374.402	35719	1.118	0.894	0.963	1.0379
559	CEP19_KAN503-31_1.tif:0012-0850	1.436	263.905	0	1900	64.538	87.109	0.851	378.972	36155	1.25	0.8	0.913	1.05057
560	CEP19_KAN503-31_1.tif:0013-0893	1.792	307.339	0	1956	105.782	91.476	0.918	550.874	52555	1.211	0.825	0.947	1.52711
561	CEP19_KAN503-31_1.tif:0014-0946	1.426	143.529	0	992	48.745	96.91	0.926	204.606	19520	1.232	0.811	0.954	0.567201
562	CEP19_KAN503-31_2.tif:0001-0081	1.195	97.465	0	500	116.113	8.365	0.916	116.464	11111	1.183	0.845	0.95	0.322857
563	CEP19_KAN503-31_2.tif:0002-0101	1.792	274.889	0	2087	101.456	10.445	0.896	492.71	47006	1.25	0.8	0.953	1.36587
564	CEP19_KAN503-31_2.tif:0003-0125	1.677	136.069	0	1115	57.857	12.691	0.749	228.201	21771	1.721	0.581	0.882	0.632609
565	CEP19_KAN503-31_2.tif:0004-0234	1.688	220.522	0	1725	21.568	23.955	0.824	372.148	35504	1.439	0.695	0.928	1.03165
566	CEP19_KAN503-31_2.tif:0005-0237	1.216	48.897	0	388	72.572	24.331	0.96	59.453	5672	1.081	0.925	0.947	0.164814
567	CEP19_KAN503-31_2.tif:0006-0243	1.719	200.549	0	1317	2.055	24.814	0.812	344.748	32890	1.616	0.619	0.916	0.955698
568	CEP19_KAN503-31_2.tif:0007-0442	1.625	168.806	0	1216	22.954	45.201	0.861	274.258	26165	1.345	0.744	0.942	0.760287
569	CEP19_KAN503-31_2.tif:0008-0529	1.929	233.109	0	2046	115.3	54.216	0.824	449.588	42892	1.457	0.686	0.918	1.24633
570	CEP19_KAN503-31_2.tif:0009-0534	1.95	165.419	0	1440	87.839	54.69	0.79	322.506	30768	1.904	0.525	0.93	0.894039
571	CEP19_KAN503-31_2.tif:0010-0800	2.023	173.161	0	1294	123.304	81.95	0.838	350.304	33420	1.69	0.592	0.932	0.971099
572	CEP19_KAN503-31_2.tif:0011-0819	1.478	265.475	0	1868	89.346	83.847	0.765	392.357	37432	1.455	0.687	0.881	1.08768
573	CEP19_KAN503-31_2.tif:0012-0834	1.572	141.5	0	858	56.512	85.423	0.885	222.477	21225	1.043	0.958	0.952	0.616744
574	CEP19_KAN503-31_3.tif:0001-0106	1.457	463.173	0	3726	96.463	10.831	0.921	674.833	64381	1.11	0.901	0.955	1.87075
575	CEP19_KAN503-31_3.tif:0002-0238	1.646	391.573	0	2663	99.767	24.385	0.917	644.393	61477	1.293	0.774	0.954	1.78636
576	CEP19_KAN503-31_3.tif:0003-0239	1.153	42.955	0	323	20.118	24.477	0.938	49.527	4725	1.234	0.81	0.936	0.137296
577	CEP19_KAN503-31_3.tif:0004-0429	1.74	181.711	0	1446	112.287	43.952	0.882	316.175	30164	1.399	0.715	0.912	0.876488
578	CEP19_KAN503-31_3.tif:0005-0470	1.719	221.384	0	1908	75.726	48.166	0.859	380.565	36307	1.651	0.606	0.943	1.05499
579	CEP19_KAN503-31_3.tif:0006-0489	1.478	289.128	0	2222	53.713	50.015	0.876	427.314	40767	1.165	0.859	0.934	1.18458
580	CEP19_KAN503-31_3.tif:0007-0568	1.457	195.705	0	1143	113.896	58.175	0.921	285.138	27203	1.177	0.85	0.955	0.790449
581	CEP19_KAN503-31_3.tif:0008-0673	1.467	156	0	719	58.236	68.942	0.942	228.924	21840	1.195	0.837	0.94	0.634614
582	CEP19_KAN503-31_3.tif:0009-0744	1.53	336.767	0	2024	110.746	76.17	0.907	515.372	49168	1.21	0.826	0.945	1.4287
583	CEP19_KAN503-31_3.tif:0010-0889	1.132	123.861	0	650	40.548	91.003	0.933	140.216	13377	1.214	0.824	0.952	0.388701
584	CEP19_KAN503-31_3.tif:0011-0940	1.342	225.688	0	1670	2.562	96.265	0.931	302.8	28888	1.103	0.907	0.955	0.839411
585	CEP19_KAN503-31_3.tif:0012-0962	1.446	238.449	0	1398	84.103	98.548	0.939	344.916	32906	1.262	0.792	0.965	0.956163
586	CEP19_KAN503-31_3.tif:0013-0986	1.771	162.296	0	1107	34.764	100.979	0.877	287.496	27428	1.316	0.76	0.916	0.796987
587	CEP19_KAN503-31_4.tif:0001-0028	1.509	308.528	0	2551	117.399	2.871	0.919	465.688	44428	1.034	0.968	0.941	1.29096
588	CEP19_KAN503-31_4.tif:0002-0165	1.111	172.349	0	833	117.807	16.966	0.888	191.493	18269	1.03	0.971	0.942	0.53085
589	CEP19_KAN503-31_4.tif:0003-0225	1.457	280.317	0	1745	31.736	23.076	0.972	408.415	38964	1.102	0.907	0.962	1.13219
590	CEP19_KAN503-31_4.tif:0004-0287	1.384	328.811	0	2055	95.572	29.454	0.874	454.944	43403	1.094	0.914	0.946	1.26118
591	CEP19_KAN503-31_4.tif:0005-0339	1.017	294.536	0	1302	5.549	34.791	0.933	299.467	28570	1.121	0.892	0.956	0.83017
592	CEP19_KAN503-31_4.tif:0006-0356	1.467	235.064	0	948	48.207	36.44	0.968	344.948	32909	1.19	0.84	0.936	0.956251
593	CEP19_KAN503-31_4.tif:0007-0468	1.415	195.904	0	1556	120.788	47.959	0.944	277.214	26447	1.199	0.834	0.954	0.768481
594	CEP19_KAN503-31_4.tif:0008-0482	1.226	342.368	0	1865	29.019	49.327	0.912	419.872	40057	1.244	0.804	0.951	1.16395
595	CEP19_KAN503-31_4.tif:0009-0536	1.279	276.082	0	1750	1.771	54.891	0.951	353.05	33682	1.11	0.901	0.972	0.978712
596	CEP19_KAN503-31_4.tif:0010-0790	1.488	293.014	0	2095	68.891	80.873	0.882	436.129	41608	1.285	0.778	0.94	1.20902
597	CEP19_KAN503-31_4.tif:0011-0799	1.499	326.762	0	2457	10.434	81.8	0.937	489.786	46727	1.239	0.807	0.95	1.35777
598	CEP19_KAN503-31_4.tif:0012-0844	1.352	295.147	0	1278	99.618	86.412	0.966	399.086	38074	1.016	0.984	0.959	1.10633
599	CEP19_KAN503-31_4.tif:0013-0863	1.038	156.202	0	564	121.566	88.383	0.894	162.091	15464	1.386	0.721	0.961	0.449344
600	CEP19_KAN503-31_4.tif:0014-0979	1.216	235.034	0	1234	75.229	100.268	0.96	285.777	27264	1.14	0.877	0.955	0.792221
601	CEP19_KAN503-31_4.tif:0015-1004	0.88	125.071	0	488	0.718	102.826	0.875	110.122	10506	1.165	0.859	0.939	0.305277
602	CEP19_KAN503-31_5.tif:0001-0023	1.226	182.256	0	959	42.566	2.45	0.901	223.515	21324	1.226	0.816	0.921	0.61962
603	CEP19_KAN503-31_5.tif:0002-0109	2.044	275.067	0	2704	103.144	11.129	0.865	562.226	53638	1.372	0.729	0.935	1.55858
604	CEP19_KAN503-31_5.tif:0003-0156	1.887	164.472	0	1349	72.005	15.982	0.817	310.315	29605	1.535	0.651	0.907	0.860245
605	CEP19_KAN503-31_5.tif:0004-0173	1.614	40.143	0	824	130.354	17.72	0.856	64.799	6182	1.485	0.673	0.948	0.179633
606	CEP19_KAN503-31_5.tif:0005-0347	1.226	123.991	0	789	119.074	35.572	0.94	152.06	14507	1.132	0.884	0.951	0.421536
607	CEP19_KAN503-31_5.tif:0006-0365	1.551	71.02	0	826	57.149	37.314	0.877	110.175	10511	1.449	0.69	0.916	0.305423
608	CEP19_KAN503-31_5.tif:0007-0390	1.709	376.276	0	3180	90.17	40.002	0.897	642.884	61333	1.222	0.818	0.937	1.78218
609	CEP19_KAN503-31_5.tif:0008-0392	1.31	196.664	0	1137	2.858	40.152	0.992	257.676	24583	1.023	0.978	0.951	0.714318
610	CEP19_KAN503-31_5.tif:0009-0618	1.488	214.239	0	1625	54.386	63.254	0.916	318.879	30422	1.125	0.889	0.963	0.883985
611	CEP19_KAN503-31_5.tif:0010-0621	1.541	223.551	0	1856	72.744	63.631	0.868	344.455	32862	1.273	0.785	0.955	0.954885
612	CEP19_KAN503-31_5.tif:0011-0640	1.163	107.622	0	616	8.239	65.502	0.947	125.216	11946	1.197	0.836	0.937	0.34712
613	CEP19_KAN503-31_5.tif:0012-0643	1.551	256.5	0	2056	114.711	65.841	0.896	397.912	37962	1.22	0.82	0.952	1.10308
614	CEP19_KAN503-31_5.tif:0013-0764	1.75	231.934	0	2344	55.162	78.122	0.808	405.994	38733	1.303	0.768	0.905	1.12548
615	CEP19_KAN503-31_5.tif:0014-0774	1.216	96.698	0	601	26.938	79.303	0.92	117.575	11217	1.254	0.797	0.924	0.325937
616	CEP19_KAN503-31_5.tif:0015-0872	1.509	257.507	0	2228	49.719	89.262	0.773	388.678	37081	1.299	0.77	0.862	1.07748
617	CEP19_KAN503-31_5.tif:0016-0973	1.929	161.266	0	1440	27.638	99.755	0.824	311.028	29673	1.461	0.684	0.932	0.862221
618	CEP19_KAN503-31_5.tif:0017-1023	1.551	204.784	0	951	123.987	104.725	0.969	317.684	30308	1.178	0.849	0.955	0.880672
619	CEP19_KAN503-31_6.tif:0001-0030	1.614	337.084	0	2840	94.641	3.133	0.923	544.124	51911	1.232	0.812	0.945	1.5084
620	CEP19_KAN503-31_6.tif:0002-0140	1.279	133.484	0	630	110.555	14.373	0.924	170.697	16285	1.12	0.893	0.968	0.4732
621	CEP19_KAN503-31_6.tif:0003-0249	1.897	173.177	0	1544	14.825	25.409	0.887	328.554	31345	1.25	0.8	0.931	0.910805
622	CEP19_KAN503-31_6.tif:0004-0291	1.52	115.848	0	851	129.742	29.867	0.806	176.074	16798	1.898	0.527	0.948	0.488106
623	CEP19_KAN503-31_6.tif:0005-0321	1.31	38.28	0	248	124.655	32.923	0.936	50.156	4785	1.198	0.834	0.947	0.13904
624	CEP19_KAN503-31_6.tif:0006-0432	2.065	174.34	0	1801	87.301	44.3	0.756	359.999	34345	1.28	0.781	0.86	0.997977
625	CEP19_KAN503-31_6.tif:0007-0449	1.216	156.914	0	997	38.968	45.974	0.932	190.791	18202	1.135	0.881	0.951	0.528903
626	CEP19_KAN503-31_6.tif:0008-0471	1.813	178.462	0	1263	55.327	48.181	0.785	323.617	30874	1.543	0.648	0.885	0.897119
627	CEP19_KAN503-31_6.tif:0009-0751	1.855	215.215	0	1598	118.98	76.827	0.811	399.285	38093	1.646	0.608	0.919	1.10688
628	CEP19_KAN503-31_6.tif:0010-0809	1.667	152.956	0	1203	35.257	82.84	0.825	254.919	24320	1.455	0.687	0.898	0.706676
629	CEP19_KAN503-31_6.tif:0011-0837	1.719	246.732	0	1846	96.83	85.808	0.872	424.138	40464	1.397	0.716	0.921	1.17578
630	CEP19_KAN503-31_6.tif:0012-0889	1.174	83.518	0	772	127.535	91.049	0.967	98.047	9354	1.092	0.916	0.974	0.271803
										30442.4				0.884577

## Sheet: IF condition
Exp. number	Cell line	Gene induced	Culture condition, fixation condition	rabbit-Alexa488	mouse IgG1-Alexa568	mouse IgG2b-Alexa647	Nuclear stain	Date	Replicate
Replicate 1
KAN497-13	RPE-BFP-Cas9 pMCB306 (pool)	Serum starved for 24 hours	Fixed in 4% PFA at RT for 15 minutes.	CEP19,CA5883, third bleed, 1:500	CEP170, Invitrogen, 41-3200, 1:1000	Ac-Tub, 6B-11, SIGMA, 1:2000	DAPI	2019-05-20	No.3	CEP19: box4, E9
KAN497-14	RPE-BFP-Cas9 CEP89KO (pool)	Serum starved for 24 hours	Fixed in 4% PFA at RT for 15 minutes.	CEP19,CA5883, third bleed, 1:500	CEP170, Invitrogen, 41-3200, 1:1000	Ac-Tub, 6B-11, SIGMA, 1:2000	DAPI	2019-05-20	No.3
KAN497-15	RPE-BFP-Cas9 NCS1KO (pool)	Serum starved for 24 hours	Fixed in 4% PFA at RT for 15 minutes.	CEP19,CA5883, third bleed, 1:500	CEP170, Invitrogen, 41-3200, 1:1000	Ac-Tub, 6B-11, SIGMA, 1:2000	DAPI	2019-05-20	No.3
KAN497-16	RPE-BFP-Cas9 C3orf14KO (pool)	Serum starved for 24 hours	Fixed in 4% PFA at RT for 15 minutes.	CEP19,CA5883, third bleed, 1:500	CEP170, Invitrogen, 41-3200, 1:1000	Ac-Tub, 6B-11, SIGMA, 1:2000	DAPI	2019-05-20	No.3
Replicate 2
KAN503-24	RPE-BFP-Cas9 pMCB306 (pool)		Serum starved for 24 hours. Fixed in 4% PFA at RT for 15 minutes.	CEP19,CA5883, third bleed, 1:1000	CEP170, Invitrogen, 41-3200, 1:1000	Ac-Tub, 6B-11, SIGMA, 1:2000	DAPI	2019-05-31	Ciliation time course in CEP89 KO/NCS1 KO/C3orf14 KO and their rescue lines No.2
KAN503-25	RPE-BFP-Cas9 CEP89KO (pool)		Serum starved for 24 hours. Fixed in 4% PFA at RT for 15 minutes.	CEP19,CA5883, third bleed, 1:1000	CEP170, Invitrogen, 41-3200, 1:1000	Ac-Tub, 6B-11, SIGMA, 1:2000	DAPI	2019-05-31	Ciliation time course in CEP89 KO/NCS1 KO/C3orf14 KO and their rescue lines No.2
KAN503-26	RPE-BFP-Cas9 NCS1KO (pool)		Serum starved for 24 hours. Fixed in 4% PFA at RT for 15 minutes.	CEP19,CA5883, third bleed, 1:1000	CEP170, Invitrogen, 41-3200, 1:1000	Ac-Tub, 6B-11, SIGMA, 1:2000	DAPI	2019-05-31	Ciliation time course in CEP89 KO/NCS1 KO/C3orf14 KO and their rescue lines No.2
KAN503-27	RPE-BFP-Cas9 C3orf14KO (pool)		Serum starved for 24 hours. Fixed in 4% PFA at RT for 15 minutes.	CEP19,CA5883, third bleed, 1:1000	CEP170, Invitrogen, 41-3200, 1:1000	Ac-Tub, 6B-11, SIGMA, 1:2000	DAPI	2019-05-31	Ciliation time course in CEP89 KO/NCS1 KO/C3orf14 KO and their rescue lines No.2
Replicate 3
KAN503-28	RPE-BFP-Cas9 pMCB306 (pool)		Serum starved for 24 hours. Fixed in 4% PFA at RT for 15 minutes.	CEP19,CA5883, third bleed, 1:1000	CEP170, Invitrogen, 41-3200, 1:1000	Ac-Tub, 6B-11, SIGMA, 1:2000	DAPI	2019-05-31	Ciliation time course in CEP89 KO/NCS1 KO/C3orf14 KO and their rescue lines No.3
KAN503-29	RPE-BFP-Cas9 CEP89KO (pool)		Serum starved for 24 hours. Fixed in 4% PFA at RT for 15 minutes.	CEP19,CA5883, third bleed, 1:1000	CEP170, Invitrogen, 41-3200, 1:1000	Ac-Tub, 6B-11, SIGMA, 1:2000	DAPI	2019-05-31	Ciliation time course in CEP89 KO/NCS1 KO/C3orf14 KO and their rescue lines No.3
KAN503-30	RPE-BFP-Cas9 NCS1KO (pool)		Serum starved for 24 hours. Fixed in 4% PFA at RT for 15 minutes.	CEP19,CA5883, third bleed, 1:1000	CEP170, Invitrogen, 41-3200, 1:1000	Ac-Tub, 6B-11, SIGMA, 1:2000	DAPI	2019-05-31	Ciliation time course in CEP89 KO/NCS1 KO/C3orf14 KO and their rescue lines No.3
KAN503-31	RPE-BFP-Cas9 C3orf14KO (pool)		Serum starved for 24 hours. Fixed in 4% PFA at RT for 15 minutes.	CEP19,CA5883, third bleed, 1:1000	CEP170, Invitrogen, 41-3200, 1:1000	Ac-Tub, 6B-11, SIGMA, 1:2000	DAPI	2019-05-31	Ciliation time course in CEP89 KO/NCS1 KO/C3orf14 KO and their rescue lines No.3

## Sheet: Statistics
Table Analyzed	Identify outliers of Data 1:Cleaned data						Compare column means (main column effect)
Data sets analyzed	A-D
							Number of families	1
Nested one-way ANOVA							Number of comparisons per family	3
P value	0.4069						Alpha	0.05
P value summary	ns
Significantly different (P < 0.05)?	No						Dunnett's multiple comparisons test	Mean Diff.	95.00% CI of diff.	Below threshold?	Summary	Adjusted P Value
F, DFn, Dfd	1.091, 3, 8						sgGFP vs. CEP89 KO	-0.1027	-0.3245 to 0.1192	No	ns	0.4451
							sgGFP vs. NCS1 KO	-0.08589	-0.3064 to 0.1347	No	ns	0.5661
Random effects	SD	Variance					sgGFP vs. C3ORF14 KO	0.005847	-0.2135 to 0.2252	No	ns	0.9996
Variation within subcolumns	0.4286	0.1837
Variation among subcolumn means	0.07951	0.006322					Test details	Mean 1	Mean 2	Mean Diff.	SE of diff.	N1	N2	q	DF
							sgGFP vs. CEP89 KO	0.984	1.087	-0.1027	0.07721	214	216	1.33	8
Do the subcolumns differ (within each column)?							sgGFP vs. NCS1 KO	0.984	1.07	-0.08589	0.07675	214	227	1.119	8
Chi-square, df	9.233, 1						sgGFP vs. C3ORF14 KO	0.984	0.9782	0.005847	0.07632	214	247	0.07662	8
P value	0.0024
P value summary	**
Is there significant difference between subcolumns (P < 0.05)?	Yes
Data analyzed
Number of treatments (columns)	4
Number of subjects (subcolumns)	12
Total number of values	904
