# Supplementary material for: Myristoylated Neuronal Calcium Sensor-1 captures the preciliary vesicle at distal appendages
Source: eLife. 2025 Jan 30;14:e85998. doi: 10.7554/eLife.85998 (PMC11984960; doi:10.7554/eLife.85998)
Supplement: Figure 4—source data 3. [file elife-85998-fig4-data3.xlsx]

## Sheet: Replicate1
sgSafe																																			Cell line	pMCB306	FBF1 KO	CEP89 KO	CCDC92 KO	ANKRD26 KO	INPP5E KO	KIZ KO	sgLRRC45	pMCB306	FBF1 KO	CEP89 KO	CCDC92 KO	ANKRD26 KO	INPP5E KO
	Ciliated	cell counts	ARL13B+ Ac-Tub- dot		Ciliated	cell counts	ARL13B+ Ac-Tub- dot		Ciliated	cell counts	ARL13B+ Ac-Tub- dot		Ciliated	cell counts	ARL13B+ Ac-Tub- dot		Ciliated	cell counts	ARL13B+ Ac-Tub- dot		Ciliated	cell counts	ARL13B+ Ac-Tub- dot		Ciliated	cell counts	ARL13B+ Ac-Tub- dot		Ciliated	cell counts	ARL13B+ Ac-Tub- dot				Gene transduced	sgSafe	sgSafe	sgSafe	sgSafe	sgSafe	sgSafe	sgSafe	sgSafe	sgNCS1#3	sgNCS1#3	sgNCS1#3	sgNCS1#3	sgNCS1#3	sgNCS1#3
KAN598-1	22	25		KAN598-2	25	42		KAN598-3	24	38		KAN598-4	24	45		KAN598-5	16	31		KAN598-6	28	36		KAN598-7	36	42		KAN598-9	32	45					KAN598	83.9806	55.7604	52.7197	49.6212	42.3645	80.8333	83.6066	72.4696	53.1818	31.9444	50.6912	28.9916	13.8393	50
2	38	42		2	22	36		2	17	34		2	16	38		2	20	42		2	35	41		2	36	43		2	30	40
3	31	34		3	12	28		3	25	45		3	23	51		3	11	29		3	34	41		3	35	38		3	30	41
4	28	38		4	24	39		4	24	47		4	29	43		4	13	30		4	28	40		4	30	39		4	28	41
5	27	33		5	18	36		5	18	39		5	14	39		5	17	37		5	30	37		5	26	34		5	32	43
6	27	34		6	20	36		6	18	36		6	25	48		6	9	34		6	39	45		6	41	48		6	27	37
7				7				7				7				7				7				7				7
8				8				8				8				8				8				8				8
9				9				9				9				9				9				9				9
10				10				10				10				10				10				10				10
	173	206	0		121	217	0		126	239	0		131	264	0		86	203	0		194	240	0		204	244	0		179	247	0
		83.9806				55.7604				52.7197				49.6212				42.3645				80.8333				83.6066				72.4696
sgNCS1
	Ciliated	cell counts	ARL13B+ Ac-Tub- dot		Ciliated	cell counts	ARL13B+ Ac-Tub- dot		Ciliated	cell counts	ARL13B+ Ac-Tub- dot		Ciliated	cell counts	ARL13B+ Ac-Tub- dot		Ciliated	cell counts	ARL13B+ Ac-Tub- dot		Ciliated	cell counts	ARL13B+ Ac-Tub- dot		Ciliated	cell counts	ARL13B+ Ac-Tub- dot		Ciliated	cell counts	ARL13B+ Ac-Tub- dot
KAN598-10	32	44		KAN598-11	16	38		KAN598-12	17	32		KAN598-13	11	36		KAN598-14	11	43		KAN598-15	21	38		KAN598-16	16	47		KAN598-18	19	48
2	24	39		2	9	33		2	12	35		2	19	43		2	6	40		2	17	33		2	13	39		2	16	38
3	14	30		3	8	36		3	14	24		3	8	36		3	6	34		3	21	36		3	13	41		3	24	42
4	10	29		4	5	26		4	20	37		4	8	40		4	3	40		4	17	32		4	12	35		4	18	35
5	17	32		5	14	42		5	21	41		5	13	41		5	3	36		5	16	35		5	22	47		5	15	37
6	20	46		6	17	41		6	26	48		6	10	42		6	2	31		6	14	38		6	15	37		6	14	36
7				7				7				7				7				7				7				7
8				8				8				8				8				8				8				8
9				9				9				9				9				9				9				9
10				10				10				10				10				10				10				10
	117	220	0		69	216	0		110	217	0		69	238	0		31	224	0		106	212	0		91	246	0		106	236	0
		53.1818				31.9444				50.6912				28.9916				13.8393				50				36.9919				44.9153
[truncated: 2 more columns]

## Sheet: Replicate2
																																		Cell line	pMCB306	FBF1 KO	CEP89 KO	CCDC92 KO	ANKRD26 KO	INPP5E KO	KIZ KO	sgLRRC45	pMCB306	FBF1 KO	CEP89 KO	CCDC92 KO	ANKRD26 KO	INPP5E KO	KIZ KO
sgSafe																																		Gene transduced	sgSafe	sgSafe	sgSafe	sgSafe	sgSafe	sgSafe	sgSafe	sgSafe	sgNCS1#3	sgNCS1#3	sgNCS1#3	sgNCS1#3	sgNCS1#3	sgNCS1#3	sgNCS1#3
	Ciliated	cell counts	ARL13B+dot		Ciliated	cell counts	ARL13B+dot		Ciliated	cell counts	ARL13B+dot		Ciliated	cell counts	ARL13B+dot		Ciliated	cell counts	ARL13B+dot		Ciliated	cell counts	ARL13B+dot		Ciliated	cell counts	ARL13B+dot		Ciliated	cell counts	ARL13B+ Ac-Tub- dot			KAN601	70.6667	53.0516	48.3412	51.3393	39.6313	77.2549	71.2446	63.745	35.1351	27.2727	44.4444	17.801	7	53.0233	31.7308
KAN601-1	22	26		KAN601-2	19	41		KAN601-3	19	36		KAN601-4	12	30		KAN601-5	12	35		KAN601-6	33	45		KAN601-7	26	40		KAN601-9	37	46
2	26	40		2	17	31		2	15	33		2	21	41		2	15	30		2	37	42		2	24	38		2	21	41
3	19	33		3	23	38		3	15	33		3	23	43		3	13	32		3	38	48		3	20	30		3	16	37
4	32	45		4	20	36		4	20	40		4	27	39		4	16	38		4	30	44		4	34	47		4	22	39
5	28	40		5	20	36		5	15	36		5	13	33		5	12	37		5	29	37		5	33	39		5	30	43
6	32	41		6	14	31		6	18	33		6	19	38		6	18	45		6	30	39		6	29	39		6	34	45
7				7				7				7				7				7				7				7
8				8				8				8				8				8				8				8
9				9				9				9				9				9				9				9
10				10				10				10				10				10				10				10
	159	225	0		113	213	0		102	211	0		115	224	0		86	217	0		197	255	0		166	233	0		160	251	0
		70.6667				53.0516				48.3412				51.3393				39.6313				77.2549				71.2446				63.745
sgNCS1
	Ciliated	cell counts	ARL13B+ Ac-Tub- dot		Ciliated	cell counts	ARL13B+ Ac-Tub- dot		Ciliated	cell counts	ARL13B+ Ac-Tub- dot		Ciliated	cell counts	ARL13B+ Ac-Tub- dot		Ciliated	cell counts	ARL13B+ Ac-Tub- dot		Ciliated	cell counts	ARL13B+ Ac-Tub- dot		Ciliated	cell counts	ARL13B+ Ac-Tub- dot		Ciliated	cell counts	ARL13B+ Ac-Tub- dot
KAN601-10	8	26		KAN601-11	4	28		KAN601-12	14	26		KAN601-13	11	33		KAN601-14	0	39		KAN601-15	18	31		KAN601-16	15	42		KAN601-18	15	36
2	13	30		2	7	34		2	11	31		2	2	34		2	4	31		2	19	31		2	8	34		2	13	34
3	16	36		3	7	28		3	17	36		3	3	30		3	1	31		3	23	39		3	10	36		3	15	30
4	10	34		4	8	30		4	11	34		4	8	33		4	4	37		4	24	43		4	10	32		4	17	32
5	9	30		5	15	29		5	19	33		5	2	28		5	3	36		5	14	30		5	12	35		5	18	37
6	9	29		6	7	27		6	16	38		6	8	33		6	2	26		6	16	41		6	11	29		6	11	31
7				7				7				7				7				7				7				7
8				8				8				8				8				8				8				8
9				9				9				9				9				9				9				9
10				10				10				10				10				10				10				10
	65	185	0		48	176	0		88	198	0		34	191	0		14	200	0		114	215	0		66	208	0		89	200	0
		35.1351				27.2727				44.4444				17.801				7				53.0233				31.7308				44.5
[truncated: 1 more columns]

## Sheet: Replicate3
																																			Cell line	pMCB306	FBF1 KO	CEP89 KO	CCDC92 KO	ANKRD26 KO	INPP5E KO	KIZ KO	sgLRRC45	pMCB306	FBF1 KO	CEP89 KO	CCDC92 KO	ANKRD26 KO	INPP5E KO
	Ciliated	cell counts	ARL13B+dot		Ciliated	cell counts	ARL13B+dot		Ciliated	cell counts	ARL13B+dot		Ciliated	cell counts	ARL13B+dot		Ciliated	cell counts	ARL13B+dot		Ciliated	cell counts	ARL13B+dot		Ciliated	cell counts	ARL13B+dot		Ciliated	cell counts	ARL13B+ Ac-Tub- dot				Gene transduced	sgSafe	sgSafe	sgSafe	sgSafe	sgSafe	sgSafe	sgSafe	sgSafe	sgNCS1#3	sgNCS1#3	sgNCS1#3	sgNCS1#3	sgNCS1#3	sgNCS1#3
KAN607-1	29	45		KAN607-2	18	39		KAN607-3	18	42		KAN607-4	12	35		KAN607-5	12	28		KAN607-6	26	39		KAN607-7	30	43		KAN607-9	21	32					KAN607	65.5431	49.1228	39.1129	38.6555	43.7186	68.2927	69.9153	66.1972	40.9302	27.2251	44.7005	17.6471	7.61905	40.8696
2	18	30		2	19	40		2	14	39		2	17	37		2	19	41		2	35	51		2	19	33		2	31	44
3	31	50		3	18	40		3	23	46		3	12	40		3	14	33		3	22	33		3	31	45		3	25	36
4	30	50		4	16	41		4	16	44		4	17	37		4	17	35		4	30	43		4	32	38		4	21	33
5	28	42		5	13	31		5	15	36		5	26	51		5	10	29		5	31	36		5	28	36		5	20	32
6	39	50		6	28	37		6	11	41		6	8	38		6	15	33		6	24	44		6	25	41		6	23	36
7				7				7				7				7				7				7				7
8				8				8				8				8				8				8				8
9				9				9				9				9				9				9				9
10				10				10				10				10				10				10				10
	175	267	0		112	228	0		97	248	0		92	238	0		87	199	0		168	246	0		165	236	0		141	213	0
		65.5431				49.1228				39.1129				38.6555				43.7186				68.2927				69.9153				66.1972
	Ciliated	cell counts	ARL13B+ Ac-Tub- dot		Ciliated	cell counts	ARL13B+ Ac-Tub- dot		Ciliated	cell counts	ARL13B+ Ac-Tub- dot		Ciliated	cell counts	ARL13B+ Ac-Tub- dot		Ciliated	cell counts	ARL13B+ Ac-Tub- dot		Ciliated	cell counts	ARL13B+ Ac-Tub- dot		Ciliated	cell counts	ARL13B+ Ac-Tub- dot		Ciliated	cell counts	ARL13B+ Ac-Tub- dot
KAN607-10	16	38		KAN607-11	4	31		KAN607-12	21	36		KAN607-13	4	34		KAN607-14	4	29		KAN607-15	21	41		KAN607-16	16	43		KAN607-18	16	37
2	18	38		2	15	33		2	15	35		2	6	36		2	1	35		2	13	37		2	8	30		2	13	33
3	13	35		3	5	30		3	18	40		3	4	32		3	0	32		3	20	43		3	13	32		3	28	49
4	15	32		4	12	32		4	11	33		4	5	37		4	1	36		4	16	41		4	12	34		4	14	38
5	6	29		5	8	30		5	13	41		5	9	33		5	4	38		5	9	32		5	18	46		5	14	34
6	20	43		6	8	35		6	19	32		6	8	32		6	6	40		6	15	36		6	11	38		6	23	46
7				7				7				7				7				7				7				7
8				8				8				8				8				8				8				8
9				9				9				9				9				9				9				9
10				10				10				10				10				10				10				10
	88	215	0		52	191	0		97	217	0		36	204	0		16	210	0		94	230	0		78	223	0		108	237	0
		40.9302				27.2251				44.7005				17.6471				7.61905				40.8696				34.9776				45.5696
[truncated: 2 more columns]

## Sheet: Total
Cell line	pMCB306	FBF1 KO	CEP89 KO	ANKRD26 KO	INPP5E KO	KIZ KO	sgLRRC45	pMCB306	FBF1 KO	CEP89 KO	ANKRD26 KO	INPP5E KO	KIZ KO	sgLRRC45
Gene transduced	sgSafe	sgSafe	sgSafe	sgSafe	sgSafe	sgSafe	sgSafe	sgNCS1#3	sgNCS1#3	sgNCS1#3	sgNCS1#3	sgNCS1#3	sgNCS1#3	sgNCS1#3
KAN598	83.9806	55.7604	52.7197	42.3645	80.8333	83.6066	72.4696	53.1818	31.9444	50.6912	13.8393	50	36.9919	44.9153
KAN601	70.6667	53.0516	48.3412	39.6313	77.2549	71.2446	63.745	35.1351	27.2727	44.4444	7	53.0233	31.7308	44.5
KAN607	65.5431	49.1228	39.1129	43.7186	68.2927	69.9153	66.1972	40.9302	27.2251	44.7005	7.61905	40.8696	34.9776	45.5696
AVERAGE	73.3968	52.6449	46.7246	41.9048	75.4603	74.9221	67.4706	43.0824	28.8141	46.612	9.48611	47.9643	34.5667	44.995
Cell line	pMCB306		FBF1 KO		CEP89 KO		ANKRD26 KO		INPP5E KO		KIZ KO		sgLRRC45
Gene transduced	sgSafe	sgNCS1#3	sgSafe	sgNCS1#3	sgSafe	sgNCS1#3	sgSafe	sgNCS1#3	sgSafe	sgNCS1#3	sgSafe	sgNCS1#3	sgSafe	sgNCS1#3
KAN598	83.9806	53.1818	55.7604	31.9444	52.7197	50.6912	42.3645	13.8393	80.8333	50	83.6066	36.9919	72.4696	44.9153
KAN601	70.6667	35.1351	53.0516	27.2727	48.3412	44.4444	39.6313	7	77.2549	53.0233	71.2446	31.7308	63.745	44.5
KAN607	65.5431	40.9302	49.1228	27.2251	39.1129	44.7005	43.7186	7.61905	68.2927	40.8696	69.9153	34.9776	66.1972	45.5696
AVERAGE	73.3968	43.0824	52.6449	28.8141	46.7246	46.612	41.9048	9.48611	75.4603	47.9643	74.9221	34.5667	67.4706	44.995
S.E.M	3.17237	3.07127	1.11247	0.903687	2.31531	1.17833	0.694015	1.26088	2.15335	2.10914	2.51674	0.884834	1.49985	0.179749

## Sheet: IF condition
Exp. number	Cell line	Gene induced	Culture condition, fixation condition	rabbit-Alexa488	mouse IgG1-Alexa568	mouse IgG2b-Alexa647	Nuclear stain	Date	Replicate
Replicate 1
KAN598-1	RPE-BFP-Cas9 pMCB306 (pool)	pGH119	serum starved for 24 hours, Fixed in 4% PFA at RT for 15 minutes.	ARL13B, Proteintech, 17711-1-AP, 1:2000	CEP170, Invitrogen, 41-3200, 1:1000	Ac-Tub, 6B-11, Santa Cruz, 1:1000	DAPI		2020-12-08	No.1
KAN598-2	RPE-BFP-Cas9 FBF1 KO (pool)	pGH119	serum starved for 24 hours, Fixed in 4% PFA at RT for 15 minutes.	ARL13B, Proteintech, 17711-1-AP, 1:2000	CEP170, Invitrogen, 41-3200, 1:1000	Ac-Tub, 6B-11, Santa Cruz, 1:1000	DAPI		2020-12-08	No.1
KAN598-3	RPE-BFP-Cas9 CEP89KO (pool)	pGH119	serum starved for 24 hours, Fixed in 4% PFA at RT for 15 minutes.	ARL13B, Proteintech, 17711-1-AP, 1:2000	CEP170, Invitrogen, 41-3200, 1:1000	Ac-Tub, 6B-11, Santa Cruz, 1:1000	DAPI		2020-12-08	No.1
KAN598-4	RPE-BFP-Cas9 CCDC92 KO (pool)	pGH119	serum starved for 24 hours, Fixed in 4% PFA at RT for 15 minutes.	ARL13B, Proteintech, 17711-1-AP, 1:2000	CEP170, Invitrogen, 41-3200, 1:1000	Ac-Tub, 6B-11, Santa Cruz, 1:1000	DAPI		2020-12-08	No.1
KAN598-5	RPE-BFP-Cas9 ANKRD26 KO (pool)	pGH119	serum starved for 24 hours, Fixed in 4% PFA at RT for 15 minutes.	ARL13B, Proteintech, 17711-1-AP, 1:2000	CEP170, Invitrogen, 41-3200, 1:1000	Ac-Tub, 6B-11, Santa Cruz, 1:1000	DAPI		2020-12-08	No.1
KAN598-6	RPE-BFP-Cas9 INPP5E KO (pool)	pGH119	serum starved for 24 hours, Fixed in 4% PFA at RT for 15 minutes.	ARL13B, Proteintech, 17711-1-AP, 1:2000	CEP170, Invitrogen, 41-3200, 1:1000	Ac-Tub, 6B-11, Santa Cruz, 1:1000	DAPI		2020-12-08	No.1
KAN598-7	RPE-BFP-Cas9 Kiz KO (pool)	pGH119	serum starved for 24 hours, Fixed in 4% PFA at RT for 15 minutes.	ARL13B, Proteintech, 17711-1-AP, 1:2000	CEP170, Invitrogen, 41-3200, 1:1000	Ac-Tub, 6B-11, Santa Cruz, 1:1000	DAPI		2020-12-08	No.1
KAN598-9	RPE-BFP-Cas9 sgLRRC45#1, post-Cre, sorted	pGH119	serum starved for 24 hours, Fixed in 4% PFA at RT for 15 minutes.	ARL13B, Proteintech, 17711-1-AP, 1:2000	CEP170, Invitrogen, 41-3200, 1:1000	Ac-Tub, 6B-11, Santa Cruz, 1:1000	DAPI		2020-12-08	No.1
KAN598-10	RPE-BFP-Cas9 pMCB306 (pool)	sgNCS1#3	serum starved for 24 hours, Fixed in 4% PFA at RT for 15 minutes.	ARL13B, Proteintech, 17711-1-AP, 1:2000	CEP170, Invitrogen, 41-3200, 1:1000	Ac-Tub, 6B-11, Santa Cruz, 1:1000	DAPI		2020-12-08	No.1
KAN598-11	RPE-BFP-Cas9 FBF1 KO (pool)	sgNCS1#3	serum starved for 24 hours, Fixed in 4% PFA at RT for 15 minutes.	ARL13B, Proteintech, 17711-1-AP, 1:2000	CEP170, Invitrogen, 41-3200, 1:1000	Ac-Tub, 6B-11, Santa Cruz, 1:1000	DAPI		2020-12-08	No.1
KAN598-12	RPE-BFP-Cas9 CEP89KO (pool)	sgNCS1#3	serum starved for 24 hours, Fixed in 4% PFA at RT for 15 minutes.	ARL13B, Proteintech, 17711-1-AP, 1:2000	CEP170, Invitrogen, 41-3200, 1:1000	Ac-Tub, 6B-11, Santa Cruz, 1:1000	DAPI		2020-12-08	No.1
KAN598-13	RPE-BFP-Cas9 CCDC92 KO (pool)	sgNCS1#3	serum starved for 24 hours, Fixed in 4% PFA at RT for 15 minutes.	ARL13B, Proteintech, 17711-1-AP, 1:2000	CEP170, Invitrogen, 41-3200, 1:1000	Ac-Tub, 6B-11, Santa Cruz, 1:1000	DAPI		2020-12-08	No.1
KAN598-14	RPE-BFP-Cas9 ANKRD26 KO (pool)	sgNCS1#3	serum starved for 24 hours, Fixed in 4% PFA at RT for 15 minutes.	ARL13B, Proteintech, 17711-1-AP, 1:2000	CEP170, Invitrogen, 41-3200, 1:1000	Ac-Tub, 6B-11, Santa Cruz, 1:1000	DAPI		2020-12-08	No.1
KAN598-15	RPE-BFP-Cas9 INPP5E KO (pool)	sgNCS1#3	serum starved for 24 hours, Fixed in 4% PFA at RT for 15 minutes.	ARL13B, Proteintech, 17711-1-AP, 1:2000	CEP170, Invitrogen, 41-3200, 1:1000	Ac-Tub, 6B-11, Santa Cruz, 1:1000	DAPI		2020-12-08	No.1
KAN598-16	RPE-BFP-Cas9 Kiz KO (pool)	sgNCS1#3	serum starved for 24 hours, Fixed in 4% PFA at RT for 15 minutes.	ARL13B, Proteintech, 17711-1-AP, 1:2000	CEP170, Invitrogen, 41-3200, 1:1000	Ac-Tub, 6B-11, Santa Cruz, 1:1000	DAPI		2020-12-08	No.1
KAN598-18	RPE-BFP-Cas9 sgLRRC45#1, post-Cre, sorted	sgNCS1#3	serum starved for 24 hours, Fixed in 4% PFA at RT for 15 minutes.	ARL13B, Proteintech, 17711-1-AP, 1:2000	CEP170, Invitrogen, 41-3200, 1:1000	Ac-Tub, 6B-11, Santa Cruz, 1:1000	DAPI		2020-12-08	No.1
Replicate 2
KAN601-1	RPE-BFP-Cas9 pMCB306 (pool)	pGH119	serum starved for 24 hours, Fixed in 4% PFA at RT for 15 minutes.	ARL13B, Proteintech, 17711-1-AP, 1:2000	CEP170, Invitrogen, 41-3200, 1:1000	Ac-Tub, 6B-11, Santa Cruz, 1:1000	DAPI		2020-12-11	No.2
KAN601-2	RPE-BFP-Cas9 FBF1 KO (pool)	pGH119	serum starved for 24 hours, Fixed in 4% PFA at RT for 15 minutes.	ARL13B, Proteintech, 17711-1-AP, 1:2000	CEP170, Invitrogen, 41-3200, 1:1000	Ac-Tub, 6B-11, Santa Cruz, 1:1000	DAPI		2020-12-11	No.2
KAN601-3	RPE-BFP-Cas9 CEP89KO (pool)	pGH119	serum starved for 24 hours, Fixed in 4% PFA at RT for 15 minutes.	ARL13B, Proteintech, 17711-1-AP, 1:2000	CEP170, Invitrogen, 41-3200, 1:1000	Ac-Tub, 6B-11, Santa Cruz, 1:1000	DAPI		2020-12-11	No.2
KAN601-4	RPE-BFP-Cas9 CCDC92 KO (pool)	pGH119	serum starved for 24 hours, Fixed in 4% PFA at RT for 15 minutes.	ARL13B, Proteintech, 17711-1-AP, 1:2000	CEP170, Invitrogen, 41-3200, 1:1000	Ac-Tub, 6B-11, Santa Cruz, 1:1000	DAPI		2020-12-11	No.2
KAN601-5	RPE-BFP-Cas9 ANKRD26 KO (pool)	pGH119	serum starved for 24 hours, Fixed in 4% PFA at RT for 15 minutes.	ARL13B, Proteintech, 17711-1-AP, 1:2000	CEP170, Invitrogen, 41-3200, 1:1000	Ac-Tub, 6B-11, Santa Cruz, 1:1000	DAPI		2020-12-11	No.2
KAN601-6	RPE-BFP-Cas9 INPP5E KO (pool)	pGH119	serum starved for 24 hours, Fixed in 4% PFA at RT for 15 minutes.	ARL13B, Proteintech, 17711-1-AP, 1:2000	CEP170, Invitrogen, 41-3200, 1:1000	Ac-Tub, 6B-11, Santa Cruz, 1:1000	DAPI		2020-12-11	No.2
KAN601-7	RPE-BFP-Cas9 Kiz KO (pool)	pGH119	serum starved for 24 hours, Fixed in 4% PFA at RT for 15 minutes.	ARL13B, Proteintech, 17711-1-AP, 1:2000	CEP170, Invitrogen, 41-3200, 1:1000	Ac-Tub, 6B-11, Santa Cruz, 1:1000	DAPI		2020-12-11	No.2
KAN601-9	RPE-BFP-Cas9 sgLRRC45#1, post-Cre, sorted	pGH119	serum starved for 24 hours, Fixed in 4% PFA at RT for 15 minutes.	ARL13B, Proteintech, 17711-1-AP, 1:2000	CEP170, Invitrogen, 41-3200, 1:1000	Ac-Tub, 6B-11, Santa Cruz, 1:1000	DAPI		2020-12-11	No.2
KAN601-10	RPE-BFP-Cas9 pMCB306 (pool)	sgNCS1#3	serum starved for 24 hours, Fixed in 4% PFA at RT for 15 minutes.	ARL13B, Proteintech, 17711-1-AP, 1:2000	CEP170, Invitrogen, 41-3200, 1:1000	Ac-Tub, 6B-11, Santa Cruz, 1:1000	DAPI		2020-12-11	No.2
KAN601-11	RPE-BFP-Cas9 FBF1 KO (pool)	sgNCS1#3	serum starved for 24 hours, Fixed in 4% PFA at RT for 15 minutes.	ARL13B, Proteintech, 17711-1-AP, 1:2000	CEP170, Invitrogen, 41-3200, 1:1000	Ac-Tub, 6B-11, Santa Cruz, 1:1000	DAPI		2020-12-11	No.2
KAN601-12	RPE-BFP-Cas9 CEP89KO (pool)	sgNCS1#3	serum starved for 24 hours, Fixed in 4% PFA at RT for 15 minutes.	ARL13B, Proteintech, 17711-1-AP, 1:2000	CEP170, Invitrogen, 41-3200, 1:1000	Ac-Tub, 6B-11, Santa Cruz, 1:1000	DAPI		2020-12-11	No.2
KAN601-14	RPE-BFP-Cas9 ANKRD26 KO (pool)	sgNCS1#3	serum starved for 24 hours, Fixed in 4% PFA at RT for 15 minutes.	ARL13B, Proteintech, 17711-1-AP, 1:2000	CEP170, Invitrogen, 41-3200, 1:1000	Ac-Tub, 6B-11, Santa Cruz, 1:1000	DAPI		2020-12-11	No.2
KAN601-15	RPE-BFP-Cas9 INPP5E KO (pool)	sgNCS1#3	serum starved for 24 hours, Fixed in 4% PFA at RT for 15 minutes.	ARL13B, Proteintech, 17711-1-AP, 1:2000	CEP170, Invitrogen, 41-3200, 1:1000	Ac-Tub, 6B-11, Santa Cruz, 1:1000	DAPI		2020-12-11	No.2
KAN601-16	RPE-BFP-Cas9 Kiz KO (pool)	sgNCS1#3	serum starved for 24 hours, Fixed in 4% PFA at RT for 15 minutes.	ARL13B, Proteintech, 17711-1-AP, 1:2000	CEP170, Invitrogen, 41-3200, 1:1000	Ac-Tub, 6B-11, Santa Cruz, 1:1000	DAPI		2020-12-11	No.2
KAN601-18	RPE-BFP-Cas9 sgLRRC45#1, post-Cre, sorted	sgNCS1#3	serum starved for 24 hours, Fixed in 4% PFA at RT for 15 minutes.	ARL13B, Proteintech, 17711-1-AP, 1:2000	CEP170, Invitrogen, 41-3200, 1:1000	Ac-Tub, 6B-11, Santa Cruz, 1:1000	DAPI		2020-12-11	No.2
Replicate 3
KAN607-1	RPE-BFP-Cas9 pMCB306 (pool)	pGH119	serum starved for 24 hours, fixed in 4% PFA at RT for 15 mintues	ARL13B, Proteintech, 17711-1-AP, 1:2000	CEP170, Invitrogen, 41-3200, 1:1000	AC-Tub, 6B-11, Santa Cruz, 1:1000	DAPI		2020-12-15	No.3
KAN607-2	RPE-BFP-Cas9 FBF1 KO (pool)	pGH119	serum starved for 24 hours, fixed in 4% PFA at RT for 15 mintues	ARL13B, Proteintech, 17711-1-AP, 1:2000	CEP170, Invitrogen, 41-3200, 1:1000	AC-Tub, 6B-11, Santa Cruz, 1:1000	DAPI		2020-12-15	No.3
KAN607-3	RPE-BFP-Cas9 CEP89KO (pool)	pGH119	serum starved for 24 hours, fixed in 4% PFA at RT for 15 mintues	ARL13B, Proteintech, 17711-1-AP, 1:2000	CEP170, Invitrogen, 41-3200, 1:1000	AC-Tub, 6B-11, Santa Cruz, 1:1000	DAPI		2020-12-15	No.3
KAN607-4	RPE-BFP-Cas9 CCDC92 KO (pool)	pGH119	serum starved for 24 hours, fixed in 4% PFA at RT for 15 mintues	ARL13B, Proteintech, 17711-1-AP, 1:2000	CEP170, Invitrogen, 41-3200, 1:1000	AC-Tub, 6B-11, Santa Cruz, 1:1000	DAPI		2020-12-15	No.3
KAN607-5	RPE-BFP-Cas9 ANKRD26 KO (pool)	pGH119	serum starved for 24 hours, fixed in 4% PFA at RT for 15 mintues	ARL13B, Proteintech, 17711-1-AP, 1:2000	CEP170, Invitrogen, 41-3200, 1:1000	AC-Tub, 6B-11, Santa Cruz, 1:1000	DAPI		2020-12-15	No.3
KAN607-6	RPE-BFP-Cas9 INPP5E KO (pool)	pGH119	serum starved for 24 hours, fixed in 4% PFA at RT for 15 mintues	ARL13B, Proteintech, 17711-1-AP, 1:2000	CEP170, Invitrogen, 41-3200, 1:1000	AC-Tub, 6B-11, Santa Cruz, 1:1000	DAPI		2020-12-15	No.3
KAN607-7	RPE-BFP-Cas9 Kiz KO (pool)	pGH119	serum starved for 24 hours, fixed in 4% PFA at RT for 15 mintues	ARL13B, Proteintech, 17711-1-AP, 1:2000	CEP170, Invitrogen, 41-3200, 1:1000	AC-Tub, 6B-11, Santa Cruz, 1:1000	DAPI		2020-12-15	No.3
KAN607-9	RPE-BFP-Cas9 sgLRRC45#1, post-Cre, sorted	pGH119	serum starved for 24 hours, fixed in 4% PFA at RT for 15 mintues	ARL13B, Proteintech, 17711-1-AP, 1:2000	CEP170, Invitrogen, 41-3200, 1:1000	AC-Tub, 6B-11, Santa Cruz, 1:1000	DAPI		2020-12-15	No.3
KAN607-10	RPE-BFP-Cas9 pMCB306 (pool)	sgNCS1#3	serum starved for 24 hours, fixed in 4% PFA at RT for 15 mintues	ARL13B, Proteintech, 17711-1-AP, 1:2000	CEP170, Invitrogen, 41-3200, 1:1000	AC-Tub, 6B-11, Santa Cruz, 1:1000	DAPI		2020-12-15	No.3
KAN607-11	RPE-BFP-Cas9 FBF1 KO (pool)	sgNCS1#3	serum starved for 24 hours, fixed in 4% PFA at RT for 15 mintues	ARL13B, Proteintech, 17711-1-AP, 1:2000	CEP170, Invitrogen, 41-3200, 1:1000	AC-Tub, 6B-11, Santa Cruz, 1:1000	DAPI		2020-12-15	No.3
KAN607-12	RPE-BFP-Cas9 CEP89KO (pool)	sgNCS1#3	serum starved for 24 hours, fixed in 4% PFA at RT for 15 mintues	ARL13B, Proteintech, 17711-1-AP, 1:2000	CEP170, Invitrogen, 41-3200, 1:1000	AC-Tub, 6B-11, Santa Cruz, 1:1000	DAPI		2020-12-15	No.3
KAN607-14	RPE-BFP-Cas9 ANKRD26 KO (pool)	sgNCS1#3	serum starved for 24 hours, fixed in 4% PFA at RT for 15 mintues	ARL13B, Proteintech, 17711-1-AP, 1:2000	CEP170, Invitrogen, 41-3200, 1:1000	AC-Tub, 6B-11, Santa Cruz, 1:1000	DAPI		2020-12-15	No.3
KAN607-15	RPE-BFP-Cas9 INPP5E KO (pool)	sgNCS1#3	serum starved for 24 hours, fixed in 4% PFA at RT for 15 mintues	ARL13B, Proteintech, 17711-1-AP, 1:2000	CEP170, Invitrogen, 41-3200, 1:1000	AC-Tub, 6B-11, Santa Cruz, 1:1000	DAPI		2020-12-15	No.3
KAN607-16	RPE-BFP-Cas9 Kiz KO (pool)	sgNCS1#3	serum starved for 24 hours, fixed in 4% PFA at RT for 15 mintues	ARL13B, Proteintech, 17711-1-AP, 1:2000	CEP170, Invitrogen, 41-3200, 1:1000	AC-Tub, 6B-11, Santa Cruz, 1:1000	DAPI		2020-12-15	No.3
KAN607-18	RPE-BFP-Cas9 sgLRRC45#1, post-Cre, sorted	sgNCS1#3	serum starved for 24 hours, fixed in 4% PFA at RT for 15 mintues	ARL13B, Proteintech, 17711-1-AP, 1:2000	CEP170, Invitrogen, 41-3200, 1:1000	AC-Tub, 6B-11, Santa Cruz, 1:1000	DAPI		2020-12-15	No.3

## Sheet: Statistics
Table Analyzed	Data 1		Table Analyzed	Data 1		Table Analyzed	Data 1		Table Analyzed	Data 1		Table Analyzed	Data 1		Table Analyzed	Data 1		Table Analyzed	Data 1
Column B	pMCB306 + sgNCS1#3		Column D	FBF1 KO + sgNCS1#3		Column F	CEP89 KO + sgNCS1#3		Column H	ANKRD26 KO + sgNCS1#3		Column J	INPP5E KO + sgNCS1#3		Column L	KIZ KO + sgNCS1#3		Column N	sgLRRC45 + sgNCS1#3
vs.	vs.		vs.	vs.		vs.	vs.		vs.	vs.		vs.	vs.		vs.	vs.		vs.	vs.
Column A	pMCB306 + sgSafe		Column C	FBF1 KO + sgSafe		Column E	CEP89 KO + sgSafe		Column G	ANKRD26 KO + sgSafe		Column I	INPP5E KO + sgSafe		Column K	KIZ KO + sgSafe		Column M	sgLRRC45 + sgSafe
Unpaired t test with Welch's correction			Unpaired t test with Welch's correction			Unpaired t test with Welch's correction			Unpaired t test with Welch's correction			Unpaired t test with Welch's correction			Unpaired t test with Welch's correction			Unpaired t test with Welch's correction
P value	0.0167		P value	0.0008		P value	0.9816		P value	0.0008		P value	0.0062		P value	0.0063		P value	0.0122
P value summary	*		P value summary	***		P value summary	ns		P value summary	***		P value summary	**		P value summary	**		P value summary	*
Significantly different (P < 0.05)?	Yes		Significantly different (P < 0.05)?	Yes		Significantly different (P < 0.05)?	No		Significantly different (P < 0.05)?	Yes		Significantly different (P < 0.05)?	Yes		Significantly different (P < 0.05)?	Yes		Significantly different (P < 0.05)?	Yes
One- or two-tailed P value?	Two-tailed		One- or two-tailed P value?	Two-tailed		One- or two-tailed P value?	Two-tailed		One- or two-tailed P value?	Two-tailed		One- or two-tailed P value?	Two-tailed		One- or two-tailed P value?	Two-tailed		One- or two-tailed P value?	Two-tailed
Welch-corrected t, df	t=3.964, df=3.996		Welch-corrected t, df	t=9.600, df=3.839		Welch-corrected t, df	t=0.02501, df=2.971		Welch-corrected t, df	t=13.00, df=3.110		Welch-corrected t, df	t=5.267, df=3.998		Welch-corrected t, df	t=8.734, df=2.487		Welch-corrected t, df	t=8.590, df=2.057
How big is the difference?			How big is the difference?			How big is the difference?			How big is the difference?			How big is the difference?			How big is the difference?			How big is the difference?
Mean of column A	73.4		Mean of column C	52.64		Mean of column E	46.72		Mean of column G	41.9		Mean of column I	75.46		Mean of column K	74.92		Mean of column M	67.47
Mean of column B	43.08		Mean of column D	28.81		Mean of column F	46.61		Mean of column H	9.486		Mean of column J	47.96		Mean of column L	34.57		Mean of column N	44.99
Difference between means (B - A) ± SEM	-30.31 ± 7.648		Difference between means (D - C) ± SEM	-23.83 ± 2.482		Difference between means (F - E) ± SEM	-0.1126 ± 4.500		Difference between means (H - G) ± SEM	-32.42 ± 2.493		Difference between means (J - I) ± SEM	-27.50 ± 5.221		Difference between means (L - K) ± SEM	-40.36 ± 4.621		Difference between means (N - M) ± SEM	-22.48 ± 2.616
95% confidence interval	-51.56 to -9.072		95% confidence interval	-30.84 to -16.82		95% confidence interval	-14.51 to 14.29		95% confidence interval	-40.20 to -24.64		95% confidence interval	-41.99 to -13.00		95% confidence interval	-56.93 to -23.78		95% confidence interval	-33.44 to -11.51
R squared (eta squared)	0.7972		R squared (eta squared)	0.96		R squared (eta squared)	0.0002105		R squared (eta squared)	0.9819		R squared (eta squared)	0.874		R squared (eta squared)	0.9684		R squared (eta squared)	0.9729
F test to compare variances			F test to compare variances			F test to compare variances			F test to compare variances			F test to compare variances			F test to compare variances			F test to compare variances
F, DFn, Dfd	1.067, 2, 2		F, DFn, Dfd	1.515, 2, 2		F, DFn, Dfd	3.861, 2, 2		F, DFn, Dfd	3.301, 2, 2		F, DFn, Dfd	1.042, 2, 2		F, DFn, Dfd	8.090, 2, 2		F, DFn, Dfd	69.62, 2, 2
P value	0.9676		P value	0.7951		P value	0.4115		P value	0.465		P value	0.9793		P value	0.22		P value	0.0283
P value summary	ns		P value summary	ns		P value summary	ns		P value summary	ns		P value summary	ns		P value summary	ns		P value summary	*
Significantly different (P < 0.05)?	No		Significantly different (P < 0.05)?	No		Significantly different (P < 0.05)?	No		Significantly different (P < 0.05)?	No		Significantly different (P < 0.05)?	No		Significantly different (P < 0.05)?	No		Significantly different (P < 0.05)?	Yes
Data analyzed			Data analyzed			Data analyzed			Data analyzed			Data analyzed			Data analyzed			Data analyzed
Sample size, column A	3		Sample size, column C	3		Sample size, column E	3		Sample size, column G	3		Sample size, column I	3		Sample size, column K	3		Sample size, column M	3
Sample size, column B	3		Sample size, column D	3		Sample size, column F	3		Sample size, column H	3		Sample size, column J	3		Sample size, column L	3		Sample size, column N	3
