# Supplementary material for: Myristoylated Neuronal Calcium Sensor-1 captures the preciliary vesicle at distal appendages
Source: eLife. 2025 Jan 30;14:e85998. doi: 10.7554/eLife.85998 (PMC11984960; doi:10.7554/eLife.85998)
Supplement: Figure 4—source data 4. [file elife-85998-fig4-data4.xlsx]

## Sheet: Replicate 1
																																		Cell line	pMCB306	FBF1 KO	CEP89 KO	CCDC92 KO	ANKRD26 KO	INPP5E KO	KIZ KO	sgLRRC45	pMCB306	FBF1 KO	CEP89 KO	CCDC92 KO	ANKRD26 KO	INPP5E KO	KIZ KO
	Ciliated	cell counts	ARL13B+dot		Ciliated	cell counts	ARL13B+dot		Ciliated	cell counts	ARL13B+dot		Ciliated	cell counts	ARL13B+dot		Ciliated	cell counts	ARL13B+dot		Ciliated	cell counts	ARL13B+dot		Ciliated	cell counts	ARL13B+dot		Ciliated	cell counts	ARL13B+ Ac-Tub- dot			Gene transduced	sgSafe	sgSafe	sgSafe	sgSafe	sgSafe	sgSafe	sgSafe	sgSafe	sgNCS1#3	sgNCS1#3	sgNCS1#3	sgNCS1#3	sgNCS1#3	sgNCS1#3	sgNCS1#3
KAN600-1	23	29		KAN600-2	32	37		KAN600-3	23	31		KAN600-4	27	44		KAN600-5	32	39		KAN600-6	41	41		KAN600-7	41	46		KAN600-9	29	42					86.8778	79	72.0183	62.5954	81.9512	89.1892	90.3846	82.6087	74.6269	75.3555	78.3898	42.6087	63.5246	81.4516	62.6126
2	36	42		2	23	30		2	25	34		2	25	43		2	40	44		2	39	43		2	35	40		2	23	31
3	31	37		3	31	38		3	25	38		3	26	46		3				3	35	42		3	35	38		3	31	36
4	37	39		4	25	30		4	27	41		4	27	41		4	44	50		4	24	35		4	47	51		4	35	41
5	26	32		5	21	33		5	24	35		5	32	48		5	33	42		5	46	49		5	37	39		5	33	36
6	39	42		6	26	32		6	33	39		6	27	40		6	19	30		6	46	49		6	40	46		6	39	44
7				7				7				7				7				7				7				7
8				8				8				8				8				8				8				8
9				9				9				9				9				9				9				9
10				10				10				10				10				10				10				10
	192	221	0		158	200	0		157	218	0		164	262	0		168	205	0		231	259	0		235	260	0		190	230	0
		86.8778				79				72.0183				62.5954				81.9512				89.1892				90.3846				82.6087
	Ciliated	cell counts	ARL13B+ Ac-Tub- dot		Ciliated	cell counts	ARL13B+ Ac-Tub- dot		Ciliated	cell counts	ARL13B+ Ac-Tub- dot		Ciliated	cell counts	ARL13B+ Ac-Tub- dot		Ciliated	cell counts	ARL13B+ Ac-Tub- dot		Ciliated	cell counts	ARL13B+ Ac-Tub- dot		Ciliated	cell counts	ARL13B+ Ac-Tub- dot		Ciliated	cell counts	ARL13B+ Ac-Tub- dot
KAN600-10	27	32		KAN600-11	23	32		KAN600-12	37	44		KAN600-13	10	32		KAN600-14	18	34		KAN600-15	43	48		KAN600-16	29	38		KAN600-18	27	35
2	24	32		2	22	28		2	25	37		2	24	47		2	29	40		2	26	33		2	10	31		2	34	43
3	31	38		3	30	38		3	31	39		3	15	33		3	27	40		3	35	42		3	29	44		3	21	30
4	37	43		4	37	43		4	35	39		4	20	40		4	32	42		4	35	45		4	19	35		4	38	43
5	15	30		5	26	35		5	30	38		5	12	34		5	18	44		5	40	49		5	30	38		5	32	42
6	16	26		6	21	35		6	27	39		6	17	44		6	31	44		6	23	31		6	22	36		6	19	25
7				7				7				7				7				7				7				7
8				8				8				8				8				8				8				8
9				9				9				9				9				9				9				9
10				10				10				10				10				10				10				10
	150	201	0		159	211	0		185	236	0		98	230	0		155	244	0		202	248	0		139	222	0		171	218	0
		74.6269				75.3555				78.3898				42.6087				63.5246				81.4516				62.6126				78.4404
[truncated: 1 more columns]

## Sheet: Replicate 2
																																	Cell line	pMCB306	FBF1 KO	CEP89 KO	CCDC92 KO	ANKRD26 KO	INPP5E KO	KIZ KO	sgLRRC45	pMCB306	FBF1 KO	CEP89 KO	CCDC92 KO	ANKRD26 KO	INPP5E KO	KIZ KO	sgLRRC45
	Ciliated	cell counts	ARL13B+dot		Ciliated	cell counts	ARL13B+dot		Ciliated	cell counts	ARL13B+dot		Ciliated	cell counts	ARL13B+dot		Ciliated	cell counts	ARL13B+dot		Ciliated	cell counts	ARL13B+dot		Ciliated	cell counts	ARL13B+dot		Ciliated	cell counts	ARL13B+ Ac-Tub- dot		Gene transduced	sgSafe	sgSafe	sgSafe	sgSafe	sgSafe	sgSafe	sgSafe	sgSafe	sgNCS1#3	sgNCS1#3	sgNCS1#3	sgNCS1#3	sgNCS1#3	sgNCS1#3	sgNCS1#3	sgNCS1#3
KAN606-1	33	37		KAN606-2	29	37		KAN606-3	33	38		KAN606-4	24	46		KAN606-5	25	36		KAN606-6	29	36		KAN606-7	32	35		KAN606-9	37	45				88.5593	86.1472	75.5656	48.7455	75.6198	88.8446	85.2814	83.2618	70.4167	81.8627	75.1092	46.875	39.726	79.8354	66.39	71.7949
2	43	48		2	41	47		2	23	34		2	18	47		2	31	39		2	38	44		2	27	32		2	32	39
3	30	33		3	22	32		3	25	34		3	34	55		3	31	40		3	41	45		3	38	45		3	35	37
4	30	38		4	33	37		4	33	42		4	14	38		4	35	42		4	39	43		4	26	35		4	26	34
5	32	35		5	39	41		5	22	36		5	21	46		5	29	36		5	44	46		5	32	36		5	36	45
6	41	45		6	35	37		6	31	37		6	25	47		6	32	49		6	32	37		6	42	48		6	28	33
7				7				7				7				7				7				7				7
8				8				8				8				8				8				8				8
9				9				9				9				9				9				9				9
10				10				10				10				10				10				10				10
	209	236	0		199	231	0		167	221	0		136	279	0		183	242	0		223	251	0		197	231	0		194	233	0
		88.5593				86.1472				75.5656				48.7455				75.6198				88.8446				85.2814				83.2618
	Ciliated	cell counts	ARL13B+ Ac-Tub- dot		Ciliated	cell counts	ARL13B+ Ac-Tub- dot		Ciliated	cell counts	ARL13B+ Ac-Tub- dot		Ciliated	cell counts	ARL13B+ Ac-Tub- dot		Ciliated	cell counts	ARL13B+ Ac-Tub- dot		Ciliated	cell counts	ARL13B+ Ac-Tub- dot		Ciliated	cell counts	ARL13B+ Ac-Tub- dot		Ciliated	cell counts	ARL13B+ Ac-Tub- dot
KAN606-10	25	36		KAN606-11	31	35		KAN606-12	26	36		KAN606-13	15	35		KAN606-14	14	32		KAN606-15	32	35		KAN606-16	28	39		KAN606-18	29	42
2	19	35		2	15	23		2	34	42		2	14	38		2	3	31		2	24	36		2	25	40		2	28	39
3	31	42		3	30	36		3	32	41		3	26	40		3	11	33		3	33	45		3	23	37		3	29	38
4	34	43		4	31	37		4	31	39		4	5	26		4	22	41		4	36	43		4	35	48		4	28	42
5	23	39		5	25	31		5	17	32		5	21	40		5	11	34		5	35	40		5	29	43		5	34	38
6	37	45		6	35	42		6	32	39		6	24	45		6	26	48		6	34	44		6	20	34		6	20	35
7				7				7				7				7				7				7				7
8				8				8				8				8				8				8				8
9				9				9				9				9				9				9				9
10				10				10				10				10				10				10				10
	169	240	0		167	204	0		172	229	0		105	224	0		87	219	0		194	243	0		160	241	0		168	234	0
		70.4167				81.8627				75.1092				46.875				39.726				79.8354				66.39				71.7949

## Sheet: Replicate 3
																																		Cell line	pMCB306	FBF1 KO	CEP89 KO	CCDC92 KO	ANKRD26 KO	INPP5E KO	KIZ KO	sgLRRC45	pMCB306	FBF1 KO	CEP89 KO	CCDC92 KO	ANKRD26 KO	INPP5E KO	KIZ KO
	Ciliated	cell counts	ARL13B+dot		Ciliated	cell counts	ARL13B+dot		Ciliated	cell counts	ARL13B+dot		Ciliated	cell counts	ARL13B+dot		Ciliated	cell counts	ARL13B+dot		Ciliated	cell counts	ARL13B+dot		Ciliated	cell counts	ARL13B+dot		Ciliated	cell counts	ARL13B+ Ac-Tub- dot			Gene transduced	sgSafe	sgSafe	sgSafe	sgSafe	sgSafe	sgSafe	sgSafe	sgSafe	sgNCS1#3	sgNCS1#3	sgNCS1#3	sgNCS1#3	sgNCS1#3	sgNCS1#3	sgNCS1#3
KAN609-1	29	34		KAN609-2	21	29		KAN609-3	32	36		KAN609-4	22	29		KAN609-5	27	33		KAN609-6	31	37		KAN609-7	27	31		KAN609-9	28	37					85.2814	79.3814	76.0204	54.6448	78	90.0433	82.7957	84.2105	57.2193	68.5	73	34.8718	46.4646	73.7557	70.8738
2	29	35		2	30	34		2	21	28		2	12	25		2	20	31		2	27	33		2	31	38		2	35	38
3	35	39		3	32	36		3	28	37		3	15	34		3	23	33		3	38	41		3	18	28		3	31	37
4	35	40		4	23	35		4	29	37		4	20	34		4	32	32		4	36	40		4	28	30		4	34	38
5	38	48		5	26	32		5	21	28		5	13	29		5	27	37		5	42	43		5	28	31		5	26	29
6	31	35		6	22	28		6	18	30		6	18	32		6	27	34		6	34	37		6	22	28		6	22	30
7				7				7				7				7				7				7				7
8				8				8				8				8				8				8				8
9				9				9				9				9				9				9				9
10				10				10				10				10				10				10				10
	197	231	0		154	194	0		149	196	0		100	183	0		156	200	0		208	231	0		154	186	0		176	209	0
		85.2814				79.3814				76.0204				54.6448				78				90.0433				82.7957				84.2105
	Ciliated	cell counts	ARL13B+ Ac-Tub- dot		Ciliated	cell counts	ARL13B+ Ac-Tub- dot		Ciliated	cell counts	ARL13B+ Ac-Tub- dot		Ciliated	cell counts	ARL13B+ Ac-Tub- dot		Ciliated	cell counts	ARL13B+ Ac-Tub- dot		Ciliated	cell counts	ARL13B+ Ac-Tub- dot		Ciliated	cell counts	ARL13B+ Ac-Tub- dot		Ciliated	cell counts	ARL13B+ Ac-Tub- dot
KAN609-10	19	31		KAN609-11	23	31		KAN609-12	26	31		KAN609-13	11	33		KAN609-14	11	35		KAN609-15	35	45		KAN609-16	22	30		KAN609-18	28	36
2	16	27		2	26	36		2	24	31		2	7	31		2	16	32		2	25	40		2	23	32		2	23	35
3	17	31		3	12	29		3	26	37		3	15	37		3	15	27		3	29	36		3	25	34		3	28	40
4	15	33		4	20	32		4	19	32		4	13	30		4	20	41		4	31	36		4	26	35		4	27	36
5	22	31		5	24	36		5	30	36		5	10	31		5	23	35		5	19	27		5	23	34		5	25	31
6	18	34		6	32	36		6	21	33		6	12	33		6	7	28		6	24	37		6	27	41		6	23	33
7				7				7				7				7				7				7				7
8				8				8				8				8				8				8				8
9				9				9				9				9				9				9				9
10				10				10				10				10				10				10				10
	107	187	0		137	200	0		146	200	0		68	195	0		92	198	0		163	221	0		146	206	0		154	211	0
		57.2193				68.5				73				34.8718				46.4646				73.7557				70.8738				72.9858
[truncated: 1 more columns]

## Sheet: Total
Cell line	pMCB306	FBF1 KO	CEP89 KO	ANKRD26 KO	INPP5E KO	KIZ KO	sgLRRC45	pMCB306	FBF1 KO	CEP89 KO	ANKRD26 KO	INPP5E KO	KIZ KO	sgLRRC45
Gene transduced	sgSafe	sgSafe	sgSafe	sgSafe	sgSafe	sgSafe	sgSafe	sgNCS1#3	sgNCS1#3	sgNCS1#3	sgNCS1#3	sgNCS1#3	sgNCS1#3	sgNCS1#3
KAN600	86.8778	79	72.0183	81.9512	89.1892	90.3846	82.6087	74.6269	75.3555	78.3898	63.5246	81.4516	62.6126	78.4404
KAN601	88.5593	86.1472	75.5656	75.6198	88.8446	85.2814	83.2618	70.4167	81.8627	75.1092	39.726	79.8354	66.39	71.7949
KAN607	85.2814	79.3814	76.0204	78	90.0433	82.7957	84.2105	57.2193	68.5	73	46.4646	73.7557	70.8738	72.9858
AVERAGE	86.9062	81.5095	74.5348	78.5237	78.5237	89.359	86.1539	83.3603	67.4209	75.2394	75.4997	#REF!	49.9051	78.3476
Cell line	pMCB306		FBF1 KO		CEP89 KO		ANKRD26 KO		INPP5E KO		KIZ KO		sgLRRC45
Gene transduced	sgSafe	sgNCS1#3	sgSafe	sgNCS1#3	sgSafe	sgNCS1#3	sgSafe	sgNCS1#3	sgSafe	sgNCS1#3	sgSafe	sgNCS1#3	sgSafe	sgNCS1#3
KAN600	86.8778	74.6269	79	75.3555	72.0183	78.3898	81.9512	63.5246	89.1892	81.4516	90.3846	62.6126	82.6087	78.4404
KAN601	88.5593	70.4167	86.1472	81.8627	75.5656	75.1092	75.6198	39.726	88.8446	79.8354	85.2814	66.39	83.2618	71.7949
KAN607	85.2814	57.2193	79.3814	68.5	76.0204	73	78	46.4646	90.0433	73.7557	82.7957	70.8738	84.2105	72.9858
AVERAGE	86.9062	67.4209	81.5095	75.2394	74.5348	75.4997	78.5237	49.9051	89.359	78.3476	86.1539	66.6255	83.3603	74.407
S.E.M	0.546384	3.02741	1.34028	2.22738	0.730378	0.90535	1.066	4.08888	0.205707	1.35266	1.28965	1.37854	0.268483	1.18113

## Sheet: Statistics
Table Analyzed	Data 1		Table Analyzed	Data 1		Table Analyzed	Data 1		Table Analyzed	Data 1		Table Analyzed	Data 1		Table Analyzed	Data 1		Table Analyzed	Data 1
Column B	pMCB306 + sgNCS1#3		Column D	FBF1 KO + sgNCS1#3		Column F	CEP89 KO + sgNCS1#3		Column H	ANKRD26 KO + sgNCS1#3		Column J	INPP5E KO + sgNCS1#3		Column L	KIZ KO + sgNCS1#3		Column N	sgLRRC45 + sgNCS1#3
vs.	vs.		vs.	vs.		vs.	vs.		vs.	vs.		vs.	vs.		vs.	vs.		vs.	vs.
Column A	pMCB306 + sgSafe		Column C	FBF1 KO + sgSafe		Column E	CEP89 KO + sgSafe		Column G	ANKRD26 KO + sgSafe		Column I	INPP5E KO + sgSafe		Column K	KIZ KO + sgSafe		Column M	sgLRRC45 + sgSafe
Unpaired t test with Welch's correction			Unpaired t test with Welch's correction			Unpaired t test with Welch's correction			Unpaired t test with Welch's correction			Unpaired t test with Welch's correction			Unpaired t test with Welch's correction			Unpaired t test with Welch's correction
P value	0.0612		P value	0.2507		P value	0.6581		P value	0.0484		P value	0.0397		P value	0.004		P value	0.0426
P value summary	ns		P value summary	ns		P value summary	ns		P value summary	*		P value summary	*		P value summary	**		P value summary	*
Significantly different (P < 0.05)?	No		Significantly different (P < 0.05)?	No		Significantly different (P < 0.05)?	No		Significantly different (P < 0.05)?	Yes		Significantly different (P < 0.05)?	Yes		Significantly different (P < 0.05)?	Yes		Significantly different (P < 0.05)?	Yes
One- or two-tailed P value?	Two-tailed		One- or two-tailed P value?	Two-tailed		One- or two-tailed P value?	Two-tailed		One- or two-tailed P value?	Two-tailed		One- or two-tailed P value?	Two-tailed		One- or two-tailed P value?	Two-tailed		One- or two-tailed P value?	Two-tailed
Welch-corrected t, df	t=3.657, df=2.130		Welch-corrected t, df	t=1.393, df=3.280		Welch-corrected t, df	t=0.4789, df=3.829		Welch-corrected t, df	t=3.910, df=2.271		Welch-corrected t, df	t=4.647, df=2.092		Welch-corrected t, df	t=5.973, df=3.982		Welch-corrected t, df	t=4.268, df=2.206
How big is the difference?			How big is the difference?			How big is the difference?			How big is the difference?			How big is the difference?			How big is the difference?			How big is the difference?
Mean of column A	86.91		Mean of column C	81.51		Mean of column E	74.53		Mean of column G	78.52		Mean of column I	89.36		Mean of column K	86.15		Mean of column M	83.36
Mean of column B	67.42		Mean of column D	75.24		Mean of column F	75.5		Mean of column H	49.91		Mean of column J	78.35		Mean of column L	66.63		Mean of column N	74.41
Difference between means (B - A) ± SEM	-19.49 ± 5.328		Difference between means (D - C) ± SEM	-6.270 ± 4.503		Difference between means (F - E) ± SEM	0.9649 ± 2.015		Difference between means (H - G) ± SEM	-28.62 ± 7.319		Difference between means (J - I) ± SEM	-11.01 ± 2.370		Difference between means (L - K) ± SEM	-19.53 ± 3.270		Difference between means (N - M) ± SEM	-8.953 ± 2.098
95% confidence interval	-41.12 to 2.149		95% confidence interval	-19.93 to 7.390		95% confidence interval	-4.729 to 6.659		95% confidence interval	-56.77 to -0.4649		95% confidence interval	-20.79 to -1.235		95% confidence interval	-28.62 to -10.43		95% confidence interval	-17.22 to -0.6885
R squared (eta squared)	0.8626		R squared (eta squared)	0.3715		R squared (eta squared)	0.05652		R squared (eta squared)	0.8707		R squared (eta squared)	0.9116		R squared (eta squared)	0.8996		R squared (eta squared)	0.892
F test to compare variances			F test to compare variances			F test to compare variances			F test to compare variances			F test to compare variances			F test to compare variances			F test to compare variances
F, DFn, Dfd	30.70, 2, 2		F, DFn, Dfd	2.762, 2, 2		F, DFn, Dfd	1.537, 2, 2		F, DFn, Dfd	14.71, 2, 2		F, DFn, Dfd	43.24, 2, 2		F, DFn, Dfd	1.143, 2, 2		F, DFn, Dfd	19.35, 2, 2
P value	0.0631		P value	0.5317		P value	0.7885		P value	0.1273		P value	0.0452		P value	0.9334		P value	0.0983
P value summary	ns		P value summary	ns		P value summary	ns		P value summary	ns		P value summary	*		P value summary	ns		P value summary	ns
Significantly different (P < 0.05)?	No		Significantly different (P < 0.05)?	No		Significantly different (P < 0.05)?	No		Significantly different (P < 0.05)?	No		Significantly different (P < 0.05)?	Yes		Significantly different (P < 0.05)?	No		Significantly different (P < 0.05)?	No
Data analyzed			Data analyzed			Data analyzed			Data analyzed			Data analyzed			Data analyzed			Data analyzed
Sample size, column A	3		Sample size, column C	3		Sample size, column E	3		Sample size, column G	3		Sample size, column I	3		Sample size, column K	3		Sample size, column M	3
Sample size, column B	3		Sample size, column D	3		Sample size, column F	3		Sample size, column H	3		Sample size, column J	3		Sample size, column L	3		Sample size, column N	3

## Sheet: IF condition
Exp. number	Cell line	Gene induced	Culture condition, fixation condition	rabbit-Alexa488	mouse IgG1-Alexa568	mouse IgG2b-Alexa647	Nuclear stain	Date	Replicate
Replicate 1
KAN600-1	RPE-BFP-Cas9 pMCB306 (pool)	pGH119	serum starved for 48 hours, Fixed in 4% PFA at RT for 15 minutes.	ARL13B, Proteintech, 17711-1-AP, 1:2000	CEP170, Invitrogen, 41-3200, 1:1000	Ac-Tub, 6B-11, Santa Cruz, 1:1000	DAPI	2020-12-11	No.1
KAN600-2	RPE-BFP-Cas9 FBF1 KO (pool)	pGH119	serum starved for 48 hours, Fixed in 4% PFA at RT for 15 minutes.	ARL13B, Proteintech, 17711-1-AP, 1:2000	CEP170, Invitrogen, 41-3200, 1:1000	Ac-Tub, 6B-11, Santa Cruz, 1:1000	DAPI	2020-12-11	No.1
KAN600-3	RPE-BFP-Cas9 CEP89KO (pool)	pGH119	serum starved for 48 hours, Fixed in 4% PFA at RT for 15 minutes.	ARL13B, Proteintech, 17711-1-AP, 1:2000	CEP170, Invitrogen, 41-3200, 1:1000	Ac-Tub, 6B-11, Santa Cruz, 1:1000	DAPI	2020-12-11	No.1
KAN600-4	RPE-BFP-Cas9 CCDC92 KO (pool)	pGH119	serum starved for 48 hours, Fixed in 4% PFA at RT for 15 minutes.	ARL13B, Proteintech, 17711-1-AP, 1:2000	CEP170, Invitrogen, 41-3200, 1:1000	Ac-Tub, 6B-11, Santa Cruz, 1:1000	DAPI	2020-12-11	No.1
KAN600-5	RPE-BFP-Cas9 ANKRD26 KO (pool)	pGH119	serum starved for 48 hours, Fixed in 4% PFA at RT for 15 minutes.	ARL13B, Proteintech, 17711-1-AP, 1:2000	CEP170, Invitrogen, 41-3200, 1:1000	Ac-Tub, 6B-11, Santa Cruz, 1:1000	DAPI	2020-12-11	No.1
KAN600-6	RPE-BFP-Cas9 INPP5E KO (pool)	pGH119	serum starved for 48 hours, Fixed in 4% PFA at RT for 15 minutes.	ARL13B, Proteintech, 17711-1-AP, 1:2000	CEP170, Invitrogen, 41-3200, 1:1000	Ac-Tub, 6B-11, Santa Cruz, 1:1000	DAPI	2020-12-11	No.1
KAN600-7	RPE-BFP-Cas9 Kiz KO (pool)	pGH119	serum starved for 48 hours, Fixed in 4% PFA at RT for 15 minutes.	ARL13B, Proteintech, 17711-1-AP, 1:2000	CEP170, Invitrogen, 41-3200, 1:1000	Ac-Tub, 6B-11, Santa Cruz, 1:1000	DAPI	2020-12-11	No.1
KAN600-8	RPE-BFP-Cas9 sgPDE6D#1, post-Cre, sorted	pGH119	serum starved for 48 hours, Fixed in 4% PFA at RT for 15 minutes.	ARL13B, Proteintech, 17711-1-AP, 1:2000	CEP170, Invitrogen, 41-3200, 1:1000	Ac-Tub, 6B-11, Santa Cruz, 1:1000	DAPI	2020-12-11	No.1
KAN600-9	RPE-BFP-Cas9 sgLRRC45#1, post-Cre, sorted	pGH119	serum starved for 48 hours, Fixed in 4% PFA at RT for 15 minutes.	ARL13B, Proteintech, 17711-1-AP, 1:2000	CEP170, Invitrogen, 41-3200, 1:1000	Ac-Tub, 6B-11, Santa Cruz, 1:1000	DAPI	2020-12-11	No.1
KAN600-10	RPE-BFP-Cas9 pMCB306 (pool)	sgNCS1#3	serum starved for 48 hours, Fixed in 4% PFA at RT for 15 minutes.	ARL13B, Proteintech, 17711-1-AP, 1:2000	CEP170, Invitrogen, 41-3200, 1:1000	Ac-Tub, 6B-11, Santa Cruz, 1:1000	DAPI	2020-12-11	No.1
KAN600-11	RPE-BFP-Cas9 FBF1 KO (pool)	sgNCS1#3	serum starved for 48 hours, Fixed in 4% PFA at RT for 15 minutes.	ARL13B, Proteintech, 17711-1-AP, 1:2000	CEP170, Invitrogen, 41-3200, 1:1000	Ac-Tub, 6B-11, Santa Cruz, 1:1000	DAPI	2020-12-11	No.1
KAN600-12	RPE-BFP-Cas9 CEP89KO (pool)	sgNCS1#3	serum starved for 48 hours, Fixed in 4% PFA at RT for 15 minutes.	ARL13B, Proteintech, 17711-1-AP, 1:2000	CEP170, Invitrogen, 41-3200, 1:1000	Ac-Tub, 6B-11, Santa Cruz, 1:1000	DAPI	2020-12-11	No.1
KAN600-13	RPE-BFP-Cas9 CCDC92 KO (pool)	sgNCS1#3	serum starved for 48 hours, Fixed in 4% PFA at RT for 15 minutes.	ARL13B, Proteintech, 17711-1-AP, 1:2000	CEP170, Invitrogen, 41-3200, 1:1000	Ac-Tub, 6B-11, Santa Cruz, 1:1000	DAPI	2020-12-11	No.1
KAN600-14	RPE-BFP-Cas9 ANKRD26 KO (pool)	sgNCS1#3	serum starved for 48 hours, Fixed in 4% PFA at RT for 15 minutes.	ARL13B, Proteintech, 17711-1-AP, 1:2000	CEP170, Invitrogen, 41-3200, 1:1000	Ac-Tub, 6B-11, Santa Cruz, 1:1000	DAPI	2020-12-11	No.1
KAN600-15	RPE-BFP-Cas9 INPP5E KO (pool)	sgNCS1#3	serum starved for 48 hours, Fixed in 4% PFA at RT for 15 minutes.	ARL13B, Proteintech, 17711-1-AP, 1:2000	CEP170, Invitrogen, 41-3200, 1:1000	Ac-Tub, 6B-11, Santa Cruz, 1:1000	DAPI	2020-12-11	No.1
KAN600-16	RPE-BFP-Cas9 Kiz KO (pool)	sgNCS1#3	serum starved for 48 hours, Fixed in 4% PFA at RT for 15 minutes.	ARL13B, Proteintech, 17711-1-AP, 1:2000	CEP170, Invitrogen, 41-3200, 1:1000	Ac-Tub, 6B-11, Santa Cruz, 1:1000	DAPI	2020-12-11	No.1
KAN600-17	RPE-BFP-Cas9 sgPDE6D#1, post-Cre, sorted	sgNCS1#3	serum starved for 48 hours, Fixed in 4% PFA at RT for 15 minutes.	ARL13B, Proteintech, 17711-1-AP, 1:2000	CEP170, Invitrogen, 41-3200, 1:1000	Ac-Tub, 6B-11, Santa Cruz, 1:1000	DAPI	2020-12-11	No.1
KAN600-18	RPE-BFP-Cas9 sgLRRC45#1, post-Cre, sorted	sgNCS1#3	serum starved for 48 hours, Fixed in 4% PFA at RT for 15 minutes.	ARL13B, Proteintech, 17711-1-AP, 1:2000	CEP170, Invitrogen, 41-3200, 1:1000	Ac-Tub, 6B-11, Santa Cruz, 1:1000	DAPI	2020-12-11	No.1
Replicate 2
KAN606-1	RPE-BFP-Cas9 pMCB306 (pool)	pGH119	serum starved for 48 hours, fixed in 4% PFA at RT for 15 mintues	ARL13B, Proteintech, 17711-1-AP, 1:2000	CEP170, Invitrogen, 41-3200, 1:1000	AC-Tub, 6B-11, Santa Cruz, 1:1000	DAPI		2020-12-15	No.2
KAN606-2	RPE-BFP-Cas9 FBF1 KO (pool)	pGH119	serum starved for 48 hours, fixed in 4% PFA at RT for 15 mintues	ARL13B, Proteintech, 17711-1-AP, 1:2000	CEP170, Invitrogen, 41-3200, 1:1000	AC-Tub, 6B-11, Santa Cruz, 1:1000	DAPI		2020-12-15	No.2
KAN606-3	RPE-BFP-Cas9 CEP89KO (pool)	pGH119	serum starved for 48 hours, fixed in 4% PFA at RT for 15 mintues	ARL13B, Proteintech, 17711-1-AP, 1:2000	CEP170, Invitrogen, 41-3200, 1:1000	AC-Tub, 6B-11, Santa Cruz, 1:1000	DAPI		2020-12-15	No.2
KAN606-4	RPE-BFP-Cas9 CCDC92 KO (pool)	pGH119	serum starved for 48 hours, fixed in 4% PFA at RT for 15 mintues	ARL13B, Proteintech, 17711-1-AP, 1:2000	CEP170, Invitrogen, 41-3200, 1:1000	AC-Tub, 6B-11, Santa Cruz, 1:1000	DAPI		2020-12-15	No.2
KAN606-5	RPE-BFP-Cas9 ANKRD26 KO (pool)	pGH119	serum starved for 48 hours, fixed in 4% PFA at RT for 15 mintues	ARL13B, Proteintech, 17711-1-AP, 1:2000	CEP170, Invitrogen, 41-3200, 1:1000	AC-Tub, 6B-11, Santa Cruz, 1:1000	DAPI		2020-12-15	No.2
KAN606-6	RPE-BFP-Cas9 INPP5E KO (pool)	pGH119	serum starved for 48 hours, fixed in 4% PFA at RT for 15 mintues	ARL13B, Proteintech, 17711-1-AP, 1:2000	CEP170, Invitrogen, 41-3200, 1:1000	AC-Tub, 6B-11, Santa Cruz, 1:1000	DAPI		2020-12-15	No.2
KAN606-7	RPE-BFP-Cas9 Kiz KO (pool)	pGH119	serum starved for 48 hours, fixed in 4% PFA at RT for 15 mintues	ARL13B, Proteintech, 17711-1-AP, 1:2000	CEP170, Invitrogen, 41-3200, 1:1000	AC-Tub, 6B-11, Santa Cruz, 1:1000	DAPI		2020-12-15	No.2
KAN606-9	RPE-BFP-Cas9 sgLRRC45#1, post-Cre, sorted	pGH119	serum starved for 48 hours, fixed in 4% PFA at RT for 15 mintues	ARL13B, Proteintech, 17711-1-AP, 1:2000	CEP170, Invitrogen, 41-3200, 1:1000	AC-Tub, 6B-11, Santa Cruz, 1:1000	DAPI		2020-12-15	No.2
KAN606-10	RPE-BFP-Cas9 pMCB306 (pool)	sgNCS1#3	serum starved for 48 hours, fixed in 4% PFA at RT for 15 mintues	ARL13B, Proteintech, 17711-1-AP, 1:2000	CEP170, Invitrogen, 41-3200, 1:1000	AC-Tub, 6B-11, Santa Cruz, 1:1000	DAPI		2020-12-15	No.2
KAN606-11	RPE-BFP-Cas9 FBF1 KO (pool)	sgNCS1#3	serum starved for 48 hours, fixed in 4% PFA at RT for 15 mintues	ARL13B, Proteintech, 17711-1-AP, 1:2000	CEP170, Invitrogen, 41-3200, 1:1000	AC-Tub, 6B-11, Santa Cruz, 1:1000	DAPI		2020-12-15	No.2
KAN606-12	RPE-BFP-Cas9 CEP89KO (pool)	sgNCS1#3	serum starved for 48 hours, fixed in 4% PFA at RT for 15 mintues	ARL13B, Proteintech, 17711-1-AP, 1:2000	CEP170, Invitrogen, 41-3200, 1:1000	AC-Tub, 6B-11, Santa Cruz, 1:1000	DAPI		2020-12-15	No.2
KAN606-13	RPE-BFP-Cas9 CCDC92 KO (pool)	sgNCS1#3	serum starved for 48 hours, fixed in 4% PFA at RT for 15 mintues	ARL13B, Proteintech, 17711-1-AP, 1:2000	CEP170, Invitrogen, 41-3200, 1:1000	AC-Tub, 6B-11, Santa Cruz, 1:1000	DAPI		2020-12-15	No.2
KAN606-14	RPE-BFP-Cas9 ANKRD26 KO (pool)	sgNCS1#3	serum starved for 48 hours, fixed in 4% PFA at RT for 15 mintues	ARL13B, Proteintech, 17711-1-AP, 1:2000	CEP170, Invitrogen, 41-3200, 1:1000	AC-Tub, 6B-11, Santa Cruz, 1:1000	DAPI		2020-12-15	No.2
KAN606-15	RPE-BFP-Cas9 INPP5E KO (pool)	sgNCS1#3	serum starved for 48 hours, fixed in 4% PFA at RT for 15 mintues	ARL13B, Proteintech, 17711-1-AP, 1:2000	CEP170, Invitrogen, 41-3200, 1:1000	AC-Tub, 6B-11, Santa Cruz, 1:1000	DAPI		2020-12-15	No.2
KAN606-16	RPE-BFP-Cas9 Kiz KO (pool)	sgNCS1#3	serum starved for 48 hours, fixed in 4% PFA at RT for 15 mintues	ARL13B, Proteintech, 17711-1-AP, 1:2000	CEP170, Invitrogen, 41-3200, 1:1000	AC-Tub, 6B-11, Santa Cruz, 1:1000	DAPI		2020-12-15	No.2
KAN606-18	RPE-BFP-Cas9 sgLRRC45#1, post-Cre, sorted	sgNCS1#3	serum starved for 48 hours, fixed in 4% PFA at RT for 15 mintues	ARL13B, Proteintech, 17711-1-AP, 1:2000	CEP170, Invitrogen, 41-3200, 1:1000	AC-Tub, 6B-11, Santa Cruz, 1:1000	DAPI		2020-12-15	No.2
Replicate 3
KAN609-1	RPE-BFP-Cas9 pMCB306 (pool)	pGH119	serum starved for 48 hours, fixed in 4% PFA at RT for 15 mintues	ARL13B, Proteintech, 17711-1-AP, 1:2000	CEP170, Invitrogen, 41-3200, 1:1000	AC-Tub, 6B-11, Santa Cruz, 1:1000	DAPI		2020-12-16	No.4
KAN609-2	RPE-BFP-Cas9 FBF1 KO (pool)	pGH119	serum starved for 48 hours, fixed in 4% PFA at RT for 15 mintues	ARL13B, Proteintech, 17711-1-AP, 1:2000	CEP170, Invitrogen, 41-3200, 1:1000	AC-Tub, 6B-11, Santa Cruz, 1:1000	DAPI		2020-12-16	No.3
KAN609-3	RPE-BFP-Cas9 CEP89KO (pool)	pGH119	serum starved for 48 hours, fixed in 4% PFA at RT for 15 mintues	ARL13B, Proteintech, 17711-1-AP, 1:2000	CEP170, Invitrogen, 41-3200, 1:1000	AC-Tub, 6B-11, Santa Cruz, 1:1000	DAPI		2020-12-16	No.3
KAN609-4	RPE-BFP-Cas9 CCDC92 KO (pool)	pGH119	serum starved for 48 hours, fixed in 4% PFA at RT for 15 mintues	ARL13B, Proteintech, 17711-1-AP, 1:2000	CEP170, Invitrogen, 41-3200, 1:1000	AC-Tub, 6B-11, Santa Cruz, 1:1000	DAPI		2020-12-16	No.3
KAN609-5	RPE-BFP-Cas9 ANKRD26 KO (pool)	pGH119	serum starved for 48 hours, fixed in 4% PFA at RT for 15 mintues	ARL13B, Proteintech, 17711-1-AP, 1:2000	CEP170, Invitrogen, 41-3200, 1:1000	AC-Tub, 6B-11, Santa Cruz, 1:1000	DAPI		2020-12-16	No.3
KAN609-6	RPE-BFP-Cas9 INPP5E KO (pool)	pGH119	serum starved for 48 hours, fixed in 4% PFA at RT for 15 mintues	ARL13B, Proteintech, 17711-1-AP, 1:2000	CEP170, Invitrogen, 41-3200, 1:1000	AC-Tub, 6B-11, Santa Cruz, 1:1000	DAPI		2020-12-16	No.3
KAN609-7	RPE-BFP-Cas9 Kiz KO (pool)	pGH119	serum starved for 48 hours, fixed in 4% PFA at RT for 15 mintues	ARL13B, Proteintech, 17711-1-AP, 1:2000	CEP170, Invitrogen, 41-3200, 1:1000	AC-Tub, 6B-11, Santa Cruz, 1:1000	DAPI		2020-12-16	No.3
KAN609-9	RPE-BFP-Cas9 sgLRRC45#1, post-Cre, sorted	pGH119	serum starved for 48 hours, fixed in 4% PFA at RT for 15 mintues	ARL13B, Proteintech, 17711-1-AP, 1:2000	CEP170, Invitrogen, 41-3200, 1:1000	AC-Tub, 6B-11, Santa Cruz, 1:1000	DAPI		2020-12-16	No.3
KAN609-10	RPE-BFP-Cas9 pMCB306 (pool)	sgNCS1#3	serum starved for 48 hours, fixed in 4% PFA at RT for 15 mintues	ARL13B, Proteintech, 17711-1-AP, 1:2000	CEP170, Invitrogen, 41-3200, 1:1000	AC-Tub, 6B-11, Santa Cruz, 1:1000	DAPI		2020-12-16	No.3
KAN609-11	RPE-BFP-Cas9 FBF1 KO (pool)	sgNCS1#3	serum starved for 48 hours, fixed in 4% PFA at RT for 15 mintues	ARL13B, Proteintech, 17711-1-AP, 1:2000	CEP170, Invitrogen, 41-3200, 1:1000	AC-Tub, 6B-11, Santa Cruz, 1:1000	DAPI		2020-12-16	No.3
KAN609-12	RPE-BFP-Cas9 CEP89KO (pool)	sgNCS1#3	serum starved for 48 hours, fixed in 4% PFA at RT for 15 mintues	ARL13B, Proteintech, 17711-1-AP, 1:2000	CEP170, Invitrogen, 41-3200, 1:1000	AC-Tub, 6B-11, Santa Cruz, 1:1000	DAPI		2020-12-16	No.3
KAN609-13	RPE-BFP-Cas9 CCDC92 KO (pool)	sgNCS1#3	serum starved for 48 hours, fixed in 4% PFA at RT for 15 mintues	ARL13B, Proteintech, 17711-1-AP, 1:2000	CEP170, Invitrogen, 41-3200, 1:1000	AC-Tub, 6B-11, Santa Cruz, 1:1000	DAPI		2020-12-16	No.3
KAN609-14	RPE-BFP-Cas9 ANKRD26 KO (pool)	sgNCS1#3	serum starved for 48 hours, fixed in 4% PFA at RT for 15 mintues	ARL13B, Proteintech, 17711-1-AP, 1:2000	CEP170, Invitrogen, 41-3200, 1:1000	AC-Tub, 6B-11, Santa Cruz, 1:1000	DAPI		2020-12-16	No.3
KAN609-15	RPE-BFP-Cas9 INPP5E KO (pool)	sgNCS1#3	serum starved for 48 hours, fixed in 4% PFA at RT for 15 mintues	ARL13B, Proteintech, 17711-1-AP, 1:2000	CEP170, Invitrogen, 41-3200, 1:1000	AC-Tub, 6B-11, Santa Cruz, 1:1000	DAPI		2020-12-16	No.3
KAN609-16	RPE-BFP-Cas9 Kiz KO (pool)	sgNCS1#3	serum starved for 48 hours, fixed in 4% PFA at RT for 15 mintues	ARL13B, Proteintech, 17711-1-AP, 1:2000	CEP170, Invitrogen, 41-3200, 1:1000	AC-Tub, 6B-11, Santa Cruz, 1:1000	DAPI		2020-12-16	No.3
KAN609-18	RPE-BFP-Cas9 sgLRRC45#1, post-Cre, sorted	sgNCS1#3	serum starved for 48 hours, fixed in 4% PFA at RT for 15 mintues	ARL13B, Proteintech, 17711-1-AP, 1:2000	CEP170, Invitrogen, 41-3200, 1:1000	AC-Tub, 6B-11, Santa Cruz, 1:1000	DAPI		2020-12-16	No.3
