# Supplementary material for: Myristoylated Neuronal Calcium Sensor-1 captures the preciliary vesicle at distal appendages
Source: eLife. 2025 Jan 30;14:e85998. doi: 10.7554/eLife.85998 (PMC11984960; doi:10.7554/eLife.85998)
Supplement: Figure 4—source data 5. [file elife-85998-fig4-data5.xlsx]

## Sheet: Replicate 1
	Rab34+ centriole	cell counts	Dot	Extension	tunnel?	preciliary vesicle??		Rab34+ centriole	cell counts	Dot	Extension	tunnel?	preciliary vesicle??		Rab34+ centriole	cell counts	Dot	Extension	tunnel?	preciliary vesicle??		Rab34+ centriole	cell counts	Dot	Extension	tunnel?	preciliary vesicle??		Rab34+ centriole	cell counts	Dot	Extension	tunnel?		Rab34+ centriole	cell counts	Dot	Extension	tunnel?	preciliary vesicle??	tunnel?		Rab34+ centriole	cell counts	Dot	Extension	tunnel?	preciliary vesicle??
KAN597-1		13	4				KAN597-2		13	3	1			KAN597-3		18	2				KAN597-4		17	3				KAN597-5		17	4			KAN597-6		14	4					KAN597-7		13	4	1			KAN597-9
2		12	3				2		11	1				2		14	1				2		16	2				2		11	3			2		13	2					2		13	0				2
3		16	2				3		11	1				3		12	3				3		12	2				3		16	5			3		13	2					3		13	3				3
4		13	2	1			4		12	2	1			4		15	1				4		11	2				4		18	4			4		13	4					4		11	1				4
5		12	2				5		11	5				5		16	1				5		13	3	1			5		12				5		16	4					5		19	2				5
6		14	1				6		10	1				6		13	1				6		12	3	1			6		12	4			6		16	4					6		15	4				6
7		12	3				7		13	3				7		15	2				7		11	3				7		11	2			7		14	6					7		15	4				7
8		11	4	1			8		13	3	1			8		14	1				8		10	1				8		13	0			8		16	1					8		13	1				8
9							9							9							9							9						9								9							9
10							10							10							10							10						10								10							10
	23	103	21	2	0	0		22	94	19	3	0	0		12	117	12	0	0	0		21	102	19	2	0	0		22	110	22	0	0		27	115	27	0	0	0			20	112	19	1	0	0
		22.3301	20.3883	1.94175					23.4043	20.2128	3.19149					10.2564	10.2564	0					20.5882	18.6275	1.96078					20	20	0				23.4783	23.4783	0						17.8571	16.9643	0.892857
	Rab34+ centriole	cell counts	Dot	Extension				Rab34+ centriole	cell counts	Dot	Extension	tunnel?	preciliary vesicle??		Rab34+ centriole	cell counts	Dot	Extension	tunnel?	preciliary vesicle??		Rab34+ centriole	cell counts	Dot	Extension	tunnel?	preciliary vesicle??		Rab34+ centriole	cell counts	Dot	Extension	tunnel?	preciliary vesicle??		Rab34+ centriole	cell counts	Dot	Extension	tunnel?	preciliary vesicle??		Rab34+ centriole	cell counts	Dot	Extension	tunnel?	preciliary vesicle??
KAN597-10		16	1				KAN597-11		13	0				KAN597-12		12	2				KAN597-13		12	1				KAN597-14		14	1				KAN597-15		12	0				KAN597-16		8	0				KAN597-18
2		17	2				2		17	0				2		15	0				2		9	1				2		14	1				2		14	3				2		15	4				2
3		11	1				3		14	2				3		16	2				3		12	1				3		14	1				3		15	1				3		7	1				3
4		19	1				4		12	0				4		18	0				4		7	2				4		11	2				4		17	1				4		16	1				4
5		16	3				5		18	3				5		16	3				5		11	1				5		12	2				5		16	0				5		17	1				5
6		19	0				6		15	1				6		12	3				6		12	3				6		16	1				6		14	0				6		14	1				6
7		16	0				7		16	2				7		16	3				7		15	0				7		13	1				7		11	1				7		18		1			7
8		17	2				8		14	0				8		15	0				8		11	1				8		12	0				8		15	1				8							8
9							9							9							9							9							9							9							9
10						0	10							10							10							10							10							10							10
	10	131	10	0	0	0		8	119	8	0	0	0		13	120	13	0	0	0		10	89	10	0	0	0		9	106	9	0	0	0		7	114	7	0	0	0		9	95	8	1	0	0
		7.63359	7.63359	0					6.72269	6.72269	0					10.8333	10.8333	0					11.236	11.236	0					8.49057	8.49057	0					6.14035	6.14035	0					9.47368	8.42105	1.05263
[truncated: 19 more columns]

## Sheet: Replicate 2
	Rab34+ centriole	cell counts	Dot	Extension	tunnel?	preciliary vesicle??		Rab34+ centriole	cell counts	Dot	Extension	tunnel?	preciliary vesicle??		Rab34+ centriole	cell counts	Dot	Extension	tunnel?	preciliary vesicle??		Rab34+ centriole	cell counts	Dot	Extension	tunnel?	preciliary vesicle??		Rab34+ centriole	cell counts	Dot	Extension	tunnel?	preciliary vesicle??		Rab34+ centriole	cell counts	Dot	Extension	tunnel?	preciliary vesicle??		Rab34+ centriole	cell counts	Dot	Extension	tunnel?	preciliary vesicle??
KAN599-1		11	1				KAN599-2		11	1				KAN599-3		14	1				KAN599-4		16	3				KAN599-5		14	2				KAN599-6		14	2				KAN599-7		9	2	1			KAN599-9
2		8	3	1			2		14	2	1			2		11	1				2		11	2				2		12	1	1			2		14	1				2		10	1				2
3		14	4				3		12	2	2			3		11					3		12	3	1			3		14	4				3		11	0				3		13	1				3
4		14	3				4		12	2				4		13	1				4		12	2				4		15	4				4		17	6	1			4		11	1	1			4
5		12	4				5		11	2				5		10	3	1			5		8					5		13	4				5		15	5				5		11					5
6		15	4				6		14	3	1			6		12	1				6		12	3				6		10	3				6		15	3				6		12	1				6
7		10	2	2			7		13	1				7		16	0				7		12	1				7		11	4				7		11	2				7		7	1				7
8		14	1				8		11	3				8		15	4				8		13	1				8		10	1				8		15	5				8		11	1				8
9							9							9							9							9							9							9							9
10							10							10							10							10							10							10							10
	25	98	22	3	0	0		20	98	16	4	0	0		12	102	11	1	0	0		16	96	15	1	0	0		24	99	23	1	0	0		25	112	24	1	0	0		10	84	8	2	0	0
		25.5102	22.449	3.06122					20.4082	16.3265	4.08163					11.7647	10.7843	0.980392					16.6667	15.625	1.04167					24.2424	23.2323	1.0101					22.3214	21.4286	0.892857					11.9048	9.52381	2.38095
	Rab34+ centriole	cell counts	Dot	Extension				Rab34+ centriole	cell counts	Dot	Extension	tunnel?	preciliary vesicle??		Rab34+ centriole	cell counts	Dot	Extension	tunnel?	preciliary vesicle??		Rab34+ centriole	cell counts	Dot	Extension	tunnel?	preciliary vesicle??		Rab34+ centriole	cell counts	Dot	Extension	tunnel?	preciliary vesicle??		Rab34+ centriole	cell counts	Dot	Extension	tunnel?	preciliary vesicle??		Rab34+ centriole	cell counts	Dot	Extension	tunnel?	preciliary vesicle??
KAN599-10		9	2				KAN599-11		13	0				KAN599-12		13	0				KAN599-13		12	2				KAN599-14		17	2				KAN599-15		13	1				KAN599-16		12	0				KAN599-18
2		10	1				2		12	2				2		12	1				2		13	0				2		12	2				2		17	1				2		10	0				2
3		14	2				3		15	2				3		16	2				3		14	0				3		17	1				3		15	1				3		9	1				3
4		12	1				4		12	0				4		13	1				4		11	3				4		12	1				4		13	2				4		11	0				4
5		14	2				5		14	0				5		11	0				5		12	1				5		14	1				5		16	1				5		11	0				5
6		13	3				6		14	1				6		14	1				6		12	0				6		11	0				6		9	1				6		11	1				6
7		12	2				7		9	1				7		13	0				7		11	1				7		13	1				7		12	1				7		12	0				7
8		13	1				8		9	2				8		18	1				8		11	3				8		11	1				8		10	1				8		12	1				8
9							9							9							9							9							9							9							9
10							10							10							10							10							10							10							10
	14	97	14	0	0	0		8	98	8	0	0	0		6	110	6	0	0	0		10	96	10	0	0	0		9	107	9	0	0	0		9	105	9	0	0	0		3	88	3	0	0	0
		14.433	14.433	0					8.16327	8.16327	0					5.45455	5.45455	0					10.4167	10.4167	0					8.41121	8.41121	0					8.57143	8.57143	0					3.40909	3.40909	0
[truncated: 20 more columns]

## Sheet: Replicate 3
	Rab34+ centriole	cell counts	Dot	Extension	tunnel?	preciliary vesicle??		Rab34+ centriole	cell counts	Dot	Extension	tunnel?	preciliary vesicle??		Rab34+ centriole	cell counts	Dot	Extension	tunnel?	preciliary vesicle??		Rab34+ centriole	cell counts	Dot	Extension	tunnel?	preciliary vesicle??		Rab34+ centriole	cell counts	Dot	Extension	tunnel?	preciliary vesicle??		Rab34+ centriole	cell counts	Dot	Extension	tunnel?	preciliary vesicle??		Rab34+ centriole	cell counts	Dot	Extension	tunnel?	preciliary vesicle??
KAN603-1			1				KAN603-2		12	3				KAN603-3		15	1				KAN603-4		11	1				KAN603-5		11	2				KAN603-6		10	3				KAN603-7		9	1				KAN603-9
2		11	5				2		11	3				2		14					2		14	2				2		13	2	1			2		12	2	1			2		10	1				2
3		12	3				3		10	2				3		16	2				3		11	2				3		13	2				3		8	1				3		12	1				3
4		16	3				4		11	6				4		8	0				4		11	1				4		10	2				4		10	3	1			4		15	4				4
5		11	1				5		14	4				5		12	1				5		10	3				5		14	2	1			5		11	3	1			5		15	1				5
6		9	0				6		13	2				6		11	3				6		15	2				6		13	1				6		9	3				6		15	3				6
7		13	1				7		12	4	1			7		14	1				7		13	6				7		12	2				7		15	3				7		15	3				7
8		10	2				8		11	2				8		17	2				8		10	1				8		13	4				8		12	4				8		16	3	1			8
9							9							9							9							9							9							9							9
10							10							10							10							10							10							10							10
	16	82	16	0	0	0		27	94	26	1	0	0		10	107	10	0	0	0		18	95	18	0	0	0		19	99	17	2	0	0		25	87	22	3	0	0		18	107	17	1	0	0
		19.5122	19.5122	0					28.7234	27.6596	1.06383					9.34579	9.34579	0					18.9474	18.9474	0					19.1919	17.1717	2.0202					28.7356	25.2874	3.44828					16.8224	15.8879	0.934579
	Rab34+ centriole	cell counts	Dot	Extension				Rab34+ centriole	cell counts	Dot	Extension	tunnel?	preciliary vesicle??		Rab34+ centriole	cell counts	Dot	Extension	tunnel?	preciliary vesicle??		Rab34+ centriole	cell counts	Dot	Extension	tunnel?	preciliary vesicle??		Rab34+ centriole	cell counts	Dot	Extension	tunnel?	preciliary vesicle??		Rab34+ centriole	cell counts	Dot	Extension	tunnel?	preciliary vesicle??		Rab34+ centriole	cell counts	Dot	Extension	tunnel?	preciliary vesicle??
KAN603-10		14	1				KAN603-11		11	1				KAN603-12		14	1				KAN603-13		11	2				KAN603-14		10	1				KAN603-15		14	1				KAN603-16		12	1				KAN603-18
2		9	0				2		16	3				2		12	2				2		16	1				2		10	0				2		18	1				2		13					2
3		12	3	1			3		11	0				3		18	2				3		13	1				3		13	1				3		11	3				3		12	1				3
4		10	1	1			4		12	1				4		9	1				4		10	2				4		10	1				4		16	2				4		12	1				4
5		11	0				5		7	2				5		13	0				5		12	1				5		11					5		14	0				5		18	1				5
6		10	2				6		15	1				6		20	2				6		13	2				6		11	3				6		12	2				6		12	1				6
7		10	2				7		16		1			7		14	1				7		14	1				7		13	1				7		16					7		11	1				7
8		9	0				8		12	1				8		13	2				8		17	2				8		10	0				8		14	1				8		11	1				8
9							9							9							9							9							9							9							9
10							10							10							10							10							10							10							10
	11	85	9	2	0	0		10	100	9	1	0	0		11	113	11	0	0	0		12	106	12	0	0	0		7	88	7	0	0	0		10	115	10	0	0	0		7	101	7	0	0	0
		12.9412	10.5882	2.35294					10	9	1					9.73451	9.73451	0					11.3208	11.3208	0					7.95455	7.95455	0					8.69565	8.69565	0					6.93069	6.93069	0
[truncated: 20 more columns]

## Sheet: Total
Cell line	pMCB306	FBF1 KO	CEP89 KO	ANKRD26 KO	INPP5E KO	KIZ KO	sgLRRC45	pMCB306	FBF1 KO	CEP89 KO	ANKRD26 KO	INPP5E KO	KIZ KO	sgLRRC45
Gene transduced	sgSafe	sgSafe	sgSafe	sgSafe	sgSafe	sgSafe	sgSafe	sgNCS1#3	sgNCS1#3	sgNCS1#3	sgNCS1#3	sgNCS1#3	sgNCS1#3	sgNCS1#3
KAN597	22.3301	23.4043	10.2564	20	23.4783	17.8571	14.4068	7.63359	6.72269	10.8333	8.49057	6.14035	9.47368	13.3929
KAN599	25.5102	20.4082	11.7647	24.2424	22.3214	11.9048	15.0943	14.433	8.16327	5.45455	8.41121	8.57143	3.40909	7.89474
KAN603	19.5122	28.7234	9.34579	19.1919	28.7356	16.8224	15.8879	12.9412	10	9.73451	7.95455	8.69565	6.93069	7.69231
AVERAGE	22.4508	24.1786	10.4556	21.1448	24.8451	15.5281	15.1297	11.6693	8.29532	8.67413	8.28544	7.80248	6.60449	9.65997
Cell line	pMCB306		FBF1 KO		CEP89 KO		ANKRD26 KO		INPP5E KO		KIZ KO		sgLRRC45
Gene transduced	sgSafe	sgNCS1#3	sgSafe	sgNCS1#3	sgSafe	sgNCS1#3	sgSafe	sgNCS1#3	sgSafe	sgNCS1#3	sgSafe	sgNCS1#3	sgSafe	sgNCS1#3
KAN597	22.3301	7.63359	23.4043	6.72269	10.2564	10.8333	20	8.49057	23.4783	6.14035	17.8571	9.47368	14.4068	13.3929
KAN599	25.5102	14.433	20.4082	8.16327	11.7647	5.45455	24.2424	8.41121	22.3214	8.57143	11.9048	3.40909	15.0943	7.89474
KAN603	19.5122	12.9412	28.7234	10	9.34579	9.73451	19.1919	7.95455	28.7356	8.69565	16.8224	6.93069	15.8879	7.69231
AVERAGE	22.4508	11.6693	24.1786	8.29532	10.4556	8.67413	21.1448	8.28544	24.8451	7.80248	15.5281	6.60449	15.1297	9.65997
S.E.M	1.00028	1.19123	1.40379	0.547547	0.407233	0.947285	0.904298	0.0964328	1.13953	0.480261	1.06009	1.01514	0.247056	1.07812

## Sheet: IF condition
Exp. number	Cell line	Gene induced	Culture condition, fixation condition	mouse IgG2a-Alexa488	rabbit-Alexa568	mouse IgG1-Alexa647	Nuclear stain	Date	Replicate
Replicate 1
KAN597-1	RPE-BFP-Cas9 pMCB306 (pool)	pGH119	confluent, Fixed in 4% PFA at RT for 15 minutes.	myosin Va, sc-365986, Santa Cruz, 1:1000	rab34, 27435-1-AP, Proteintech, 1:1000	CEP170, Invitrogen, 41-3200, 1:1000	DAPI	2020-12-07
KAN597-2	RPE-BFP-Cas9 FBF1 KO (pool)	pGH119	confluent, Fixed in 4% PFA at RT for 15 minutes.	myosin Va, sc-365986, Santa Cruz, 1:1000	rab34, 27435-1-AP, Proteintech, 1:1000	CEP170, Invitrogen, 41-3200, 1:1000	DAPI	2020-12-07
KAN597-3	RPE-BFP-Cas9 CEP89KO (pool)	pGH119	confluent, Fixed in 4% PFA at RT for 15 minutes.	myosin Va, sc-365986, Santa Cruz, 1:1000	rab34, 27435-1-AP, Proteintech, 1:1000	CEP170, Invitrogen, 41-3200, 1:1000	DAPI	2020-12-07
KAN597-4	RPE-BFP-Cas9 CCDC92 KO (pool)	pGH119	confluent, Fixed in 4% PFA at RT for 15 minutes.	myosin Va, sc-365986, Santa Cruz, 1:1000	rab34, 27435-1-AP, Proteintech, 1:1000	CEP170, Invitrogen, 41-3200, 1:1000	DAPI	2020-12-07
KAN597-5	RPE-BFP-Cas9 ANKRD26 KO (pool)	pGH119	confluent, Fixed in 4% PFA at RT for 15 minutes.	myosin Va, sc-365986, Santa Cruz, 1:1000	rab34, 27435-1-AP, Proteintech, 1:1000	CEP170, Invitrogen, 41-3200, 1:1000	DAPI	2020-12-07
KAN597-6	RPE-BFP-Cas9 INPP5E KO (pool)	pGH119	confluent, Fixed in 4% PFA at RT for 15 minutes.	myosin Va, sc-365986, Santa Cruz, 1:1000	rab34, 27435-1-AP, Proteintech, 1:1000	CEP170, Invitrogen, 41-3200, 1:1000	DAPI	2020-12-07
KAN597-7	RPE-BFP-Cas9 Kiz KO (pool)	pGH119	confluent, Fixed in 4% PFA at RT for 15 minutes.	myosin Va, sc-365986, Santa Cruz, 1:1000	rab34, 27435-1-AP, Proteintech, 1:1000	CEP170, Invitrogen, 41-3200, 1:1000	DAPI	2020-12-07
KAN597-8	RPE-BFP-Cas9 sgPDE6D#1, post-Cre, sorted	pGH119	confluent, Fixed in 4% PFA at RT for 15 minutes.	myosin Va, sc-365986, Santa Cruz, 1:1000	rab34, 27435-1-AP, Proteintech, 1:1000	CEP170, Invitrogen, 41-3200, 1:1000	DAPI	2020-12-07
KAN597-9	RPE-BFP-Cas9 sgLRRC45#1, post-Cre, sorted	pGH119	confluent, Fixed in 4% PFA at RT for 15 minutes.	myosin Va, sc-365986, Santa Cruz, 1:1000	rab34, 27435-1-AP, Proteintech, 1:1000	CEP170, Invitrogen, 41-3200, 1:1000	DAPI	2020-12-07
KAN597-10	RPE-BFP-Cas9 Kiz KO (pool)	sgNCS1#3	confluent, Fixed in 4% PFA at RT for 15 minutes.	myosin Va, sc-365986, Santa Cruz, 1:1000	rab34, 27435-1-AP, Proteintech, 1:1000	CEP170, Invitrogen, 41-3200, 1:1000	DAPI	2020-12-07
KAN597-11	RPE-BFP-Cas9 sgPDE6D#1, post-Cre, sorted	sgNCS1#3	confluent, Fixed in 4% PFA at RT for 15 minutes.	myosin Va, sc-365986, Santa Cruz, 1:1000	rab34, 27435-1-AP, Proteintech, 1:1000	CEP170, Invitrogen, 41-3200, 1:1000	DAPI	2020-12-07
KAN597-12	RPE-BFP-Cas9 sgLRRC45#1, post-Cre, sorted	sgNCS1#3	confluent, Fixed in 4% PFA at RT for 15 minutes.	myosin Va, sc-365986, Santa Cruz, 1:1000	rab34, 27435-1-AP, Proteintech, 1:1000	CEP170, Invitrogen, 41-3200, 1:1000	DAPI	2020-12-07
KAN597-13	RPE-BFP-Cas9 pMCB306 (pool)	sgNCS1#3	confluent, Fixed in 4% PFA at RT for 15 minutes.	myosin Va, sc-365986, Santa Cruz, 1:1000	rab34, 27435-1-AP, Proteintech, 1:1000	CEP170, Invitrogen, 41-3200, 1:1000	DAPI	2020-12-07
KAN597-14	RPE-BFP-Cas9 FBF1 KO (pool)	sgNCS1#3	confluent, Fixed in 4% PFA at RT for 15 minutes.	myosin Va, sc-365986, Santa Cruz, 1:1000	rab34, 27435-1-AP, Proteintech, 1:1000	CEP170, Invitrogen, 41-3200, 1:1000	DAPI	2020-12-07
KAN597-15	RPE-BFP-Cas9 CEP89KO (pool)	sgNCS1#3	confluent, Fixed in 4% PFA at RT for 15 minutes.	myosin Va, sc-365986, Santa Cruz, 1:1000	rab34, 27435-1-AP, Proteintech, 1:1000	CEP170, Invitrogen, 41-3200, 1:1000	DAPI	2020-12-07
KAN597-16	RPE-BFP-Cas9 CCDC92 KO (pool)	sgNCS1#3	confluent, Fixed in 4% PFA at RT for 15 minutes.	myosin Va, sc-365986, Santa Cruz, 1:1000	rab34, 27435-1-AP, Proteintech, 1:1000	CEP170, Invitrogen, 41-3200, 1:1000	DAPI	2020-12-07
KAN597-17	RPE-BFP-Cas9 ANKRD26 KO (pool)	sgNCS1#3	confluent, Fixed in 4% PFA at RT for 15 minutes.	myosin Va, sc-365986, Santa Cruz, 1:1000	rab34, 27435-1-AP, Proteintech, 1:1000	CEP170, Invitrogen, 41-3200, 1:1000	DAPI	2020-12-07
KAN597-18	RPE-BFP-Cas9 INPP5E KO (pool)	sgNCS1#3	confluent, Fixed in 4% PFA at RT for 15 minutes.	myosin Va, sc-365986, Santa Cruz, 1:1000	rab34, 27435-1-AP, Proteintech, 1:1000	CEP170, Invitrogen, 41-3200, 1:1000	DAPI	2020-12-07
KAN599-1	RPE-BFP-Cas9 pMCB306 (pool)	pGH119	confluent, Fixed in 4% PFA at RT for 15 minutes.	myosin Va, sc-365986, Santa Cruz, 1:1000	rab34, 27435-1-AP, Proteintech, 1:1000	CEP170, Invitrogen, 41-3200, 1:1000	DAPI		2020-12-10	No.2
KAN599-2	RPE-BFP-Cas9 FBF1 KO (pool)	pGH119	confluent, Fixed in 4% PFA at RT for 15 minutes.	myosin Va, sc-365986, Santa Cruz, 1:1000	rab34, 27435-1-AP, Proteintech, 1:1000	CEP170, Invitrogen, 41-3200, 1:1000	DAPI		2020-12-10	No.2
KAN599-3	RPE-BFP-Cas9 CEP89KO (pool)	pGH119	confluent, Fixed in 4% PFA at RT for 15 minutes.	myosin Va, sc-365986, Santa Cruz, 1:1000	rab34, 27435-1-AP, Proteintech, 1:1000	CEP170, Invitrogen, 41-3200, 1:1000	DAPI		2020-12-10	No.2
KAN599-4	RPE-BFP-Cas9 CCDC92 KO (pool)	pGH119	confluent, Fixed in 4% PFA at RT for 15 minutes.	myosin Va, sc-365986, Santa Cruz, 1:1000	rab34, 27435-1-AP, Proteintech, 1:1000	CEP170, Invitrogen, 41-3200, 1:1000	DAPI		2020-12-10	No.2
KAN599-5	RPE-BFP-Cas9 ANKRD26 KO (pool)	pGH119	confluent, Fixed in 4% PFA at RT for 15 minutes.	myosin Va, sc-365986, Santa Cruz, 1:1000	rab34, 27435-1-AP, Proteintech, 1:1000	CEP170, Invitrogen, 41-3200, 1:1000	DAPI		2020-12-10	No.2
KAN599-6	RPE-BFP-Cas9 INPP5E KO (pool)	pGH119	confluent, Fixed in 4% PFA at RT for 15 minutes.	myosin Va, sc-365986, Santa Cruz, 1:1000	rab34, 27435-1-AP, Proteintech, 1:1000	CEP170, Invitrogen, 41-3200, 1:1000	DAPI		2020-12-10	No.2
KAN599-7	RPE-BFP-Cas9 Kiz KO (pool)	pGH119	confluent, Fixed in 4% PFA at RT for 15 minutes.	myosin Va, sc-365986, Santa Cruz, 1:1000	rab34, 27435-1-AP, Proteintech, 1:1000	CEP170, Invitrogen, 41-3200, 1:1000	DAPI		2020-12-10	No.2
KAN599-8	RPE-BFP-Cas9 sgPDE6D#1, post-Cre, sorted	pGH119	confluent, Fixed in 4% PFA at RT for 15 minutes.	myosin Va, sc-365986, Santa Cruz, 1:1000	rab34, 27435-1-AP, Proteintech, 1:1000	CEP170, Invitrogen, 41-3200, 1:1000	DAPI		2020-12-10	No.2
KAN599-9	RPE-BFP-Cas9 sgLRRC45#1, post-Cre, sorted	pGH119	confluent, Fixed in 4% PFA at RT for 15 minutes.	myosin Va, sc-365986, Santa Cruz, 1:1000	rab34, 27435-1-AP, Proteintech, 1:1000	CEP170, Invitrogen, 41-3200, 1:1000	DAPI		2020-12-10	No.2
KAN599-10	RPE-BFP-Cas9 pMCB306 (pool)	sgNCS1#3	confluent, Fixed in 4% PFA at RT for 15 minutes.	myosin Va, sc-365986, Santa Cruz, 1:1000	rab34, 27435-1-AP, Proteintech, 1:1000	CEP170, Invitrogen, 41-3200, 1:1000	DAPI		2020-12-10	No.2
KAN599-11	RPE-BFP-Cas9 FBF1 KO (pool)	sgNCS1#3	confluent, Fixed in 4% PFA at RT for 15 minutes.	myosin Va, sc-365986, Santa Cruz, 1:1000	rab34, 27435-1-AP, Proteintech, 1:1000	CEP170, Invitrogen, 41-3200, 1:1000	DAPI		2020-12-10	No.2
KAN599-12	RPE-BFP-Cas9 CEP89KO (pool)	sgNCS1#3	confluent, Fixed in 4% PFA at RT for 15 minutes.	myosin Va, sc-365986, Santa Cruz, 1:1000	rab34, 27435-1-AP, Proteintech, 1:1000	CEP170, Invitrogen, 41-3200, 1:1000	DAPI		2020-12-10	No.2
KAN599-13	RPE-BFP-Cas9 CCDC92 KO (pool)	sgNCS1#3	confluent, Fixed in 4% PFA at RT for 15 minutes.	myosin Va, sc-365986, Santa Cruz, 1:1000	rab34, 27435-1-AP, Proteintech, 1:1000	CEP170, Invitrogen, 41-3200, 1:1000	DAPI		2020-12-10	No.2
KAN599-14	RPE-BFP-Cas9 ANKRD26 KO (pool)	sgNCS1#3	confluent, Fixed in 4% PFA at RT for 15 minutes.	myosin Va, sc-365986, Santa Cruz, 1:1000	rab34, 27435-1-AP, Proteintech, 1:1000	CEP170, Invitrogen, 41-3200, 1:1000	DAPI		2020-12-10	No.2
KAN599-15	RPE-BFP-Cas9 INPP5E KO (pool)	sgNCS1#3	confluent, Fixed in 4% PFA at RT for 15 minutes.	myosin Va, sc-365986, Santa Cruz, 1:1000	rab34, 27435-1-AP, Proteintech, 1:1000	CEP170, Invitrogen, 41-3200, 1:1000	DAPI		2020-12-10	No.2
KAN599-16	RPE-BFP-Cas9 Kiz KO (pool)	sgNCS1#3	confluent, Fixed in 4% PFA at RT for 15 minutes.	myosin Va, sc-365986, Santa Cruz, 1:1000	rab34, 27435-1-AP, Proteintech, 1:1000	CEP170, Invitrogen, 41-3200, 1:1000	DAPI		2020-12-10	No.2
KAN599-17	RPE-BFP-Cas9 sgPDE6D#1, post-Cre, sorted	sgNCS1#3	confluent, Fixed in 4% PFA at RT for 15 minutes.	myosin Va, sc-365986, Santa Cruz, 1:1000	rab34, 27435-1-AP, Proteintech, 1:1000	CEP170, Invitrogen, 41-3200, 1:1000	DAPI		2020-12-10	No.2
KAN599-18	RPE-BFP-Cas9 sgLRRC45#1, post-Cre, sorted	sgNCS1#3	confluent, Fixed in 4% PFA at RT for 15 minutes.	myosin Va, sc-365986, Santa Cruz, 1:1000	rab34, 27435-1-AP, Proteintech, 1:1000	CEP170, Invitrogen, 41-3200, 1:1000	DAPI		2020-12-10	No.2
KAN603-1	RPE-BFP-Cas9 pMCB306 (pool)	pGH119	confluent, Fixed in 4% PFA at RT for 15 minutes.	myosin Va, sc-365986, Santa Cruz, 1:1000	rab34, 27435-1-AP, Proteintech, 1:1000	CEP170, Invitrogen, 41-3200, 1:1000	DAPI		2020-12-14	No.3
KAN603-2	RPE-BFP-Cas9 FBF1 KO (pool)	pGH119	confluent, Fixed in 4% PFA at RT for 15 minutes.	myosin Va, sc-365986, Santa Cruz, 1:1000	rab34, 27435-1-AP, Proteintech, 1:1000	CEP170, Invitrogen, 41-3200, 1:1000	DAPI		2020-12-14	No.3
KAN603-3	RPE-BFP-Cas9 CEP89KO (pool)	pGH119	confluent, Fixed in 4% PFA at RT for 15 minutes.	myosin Va, sc-365986, Santa Cruz, 1:1000	rab34, 27435-1-AP, Proteintech, 1:1000	CEP170, Invitrogen, 41-3200, 1:1000	DAPI		2020-12-14	No.3
KAN603-4	RPE-BFP-Cas9 CCDC92 KO (pool)	pGH119	confluent, Fixed in 4% PFA at RT for 15 minutes.	myosin Va, sc-365986, Santa Cruz, 1:1000	rab34, 27435-1-AP, Proteintech, 1:1000	CEP170, Invitrogen, 41-3200, 1:1000	DAPI		2020-12-14	No.3
KAN603-5	RPE-BFP-Cas9 ANKRD26 KO (pool)	pGH119	confluent, Fixed in 4% PFA at RT for 15 minutes.	myosin Va, sc-365986, Santa Cruz, 1:1000	rab34, 27435-1-AP, Proteintech, 1:1000	CEP170, Invitrogen, 41-3200, 1:1000	DAPI		2020-12-14	No.3
KAN603-6	RPE-BFP-Cas9 INPP5E KO (pool)	pGH119	confluent, Fixed in 4% PFA at RT for 15 minutes.	myosin Va, sc-365986, Santa Cruz, 1:1000	rab34, 27435-1-AP, Proteintech, 1:1000	CEP170, Invitrogen, 41-3200, 1:1000	DAPI		2020-12-14	No.3
KAN603-7	RPE-BFP-Cas9 Kiz KO (pool)	pGH119	confluent, Fixed in 4% PFA at RT for 15 minutes.	myosin Va, sc-365986, Santa Cruz, 1:1000	rab34, 27435-1-AP, Proteintech, 1:1000	CEP170, Invitrogen, 41-3200, 1:1000	DAPI		2020-12-14	No.3
KAN603-8	RPE-BFP-Cas9 sgPDE6D#1, post-Cre, sorted	pGH119	confluent, Fixed in 4% PFA at RT for 15 minutes.	myosin Va, sc-365986, Santa Cruz, 1:1000	rab34, 27435-1-AP, Proteintech, 1:1000	CEP170, Invitrogen, 41-3200, 1:1000	DAPI		2020-12-14	No.3
KAN603-9	RPE-BFP-Cas9 sgLRRC45#1, post-Cre, sorted	pGH119	confluent, Fixed in 4% PFA at RT for 15 minutes.	myosin Va, sc-365986, Santa Cruz, 1:1000	rab34, 27435-1-AP, Proteintech, 1:1000	CEP170, Invitrogen, 41-3200, 1:1000	DAPI		2020-12-14	No.3
KAN603-10	RPE-BFP-Cas9 pMCB306 (pool)	sgNCS1#3	confluent, Fixed in 4% PFA at RT for 15 minutes.	myosin Va, sc-365986, Santa Cruz, 1:1000	rab34, 27435-1-AP, Proteintech, 1:1000	CEP170, Invitrogen, 41-3200, 1:1000	DAPI		2020-12-14	No.3
KAN603-11	RPE-BFP-Cas9 FBF1 KO (pool)	sgNCS1#3	confluent, Fixed in 4% PFA at RT for 15 minutes.	myosin Va, sc-365986, Santa Cruz, 1:1000	rab34, 27435-1-AP, Proteintech, 1:1000	CEP170, Invitrogen, 41-3200, 1:1000	DAPI		2020-12-14	No.3
KAN603-12	RPE-BFP-Cas9 CEP89KO (pool)	sgNCS1#3	confluent, Fixed in 4% PFA at RT for 15 minutes.	myosin Va, sc-365986, Santa Cruz, 1:1000	rab34, 27435-1-AP, Proteintech, 1:1000	CEP170, Invitrogen, 41-3200, 1:1000	DAPI		2020-12-14	No.3
KAN603-13	RPE-BFP-Cas9 CCDC92 KO (pool)	sgNCS1#3	confluent, Fixed in 4% PFA at RT for 15 minutes.	myosin Va, sc-365986, Santa Cruz, 1:1000	rab34, 27435-1-AP, Proteintech, 1:1000	CEP170, Invitrogen, 41-3200, 1:1000	DAPI		2020-12-14	No.3
KAN603-14	RPE-BFP-Cas9 ANKRD26 KO (pool)	sgNCS1#3	confluent, Fixed in 4% PFA at RT for 15 minutes.	myosin Va, sc-365986, Santa Cruz, 1:1000	rab34, 27435-1-AP, Proteintech, 1:1000	CEP170, Invitrogen, 41-3200, 1:1000	DAPI		2020-12-14	No.3
KAN603-15	RPE-BFP-Cas9 INPP5E KO (pool)	sgNCS1#3	confluent, Fixed in 4% PFA at RT for 15 minutes.	myosin Va, sc-365986, Santa Cruz, 1:1000	rab34, 27435-1-AP, Proteintech, 1:1000	CEP170, Invitrogen, 41-3200, 1:1000	DAPI		2020-12-14	No.3
KAN603-16	RPE-BFP-Cas9 Kiz KO (pool)	sgNCS1#3	confluent, Fixed in 4% PFA at RT for 15 minutes.	myosin Va, sc-365986, Santa Cruz, 1:1000	rab34, 27435-1-AP, Proteintech, 1:1000	CEP170, Invitrogen, 41-3200, 1:1000	DAPI		2020-12-14	No.3
KAN603-17	RPE-BFP-Cas9 sgPDE6D#1, post-Cre, sorted	sgNCS1#3	confluent, Fixed in 4% PFA at RT for 15 minutes.	myosin Va, sc-365986, Santa Cruz, 1:1000	rab34, 27435-1-AP, Proteintech, 1:1000	CEP170, Invitrogen, 41-3200, 1:1000	DAPI		2020-12-14	No.3
KAN603-18	RPE-BFP-Cas9 sgLRRC45#1, post-Cre, sorted	sgNCS1#3	confluent, Fixed in 4% PFA at RT for 15 minutes.	myosin Va, sc-365986, Santa Cruz, 1:1000	rab34, 27435-1-AP, Proteintech, 1:1000	CEP170, Invitrogen, 41-3200, 1:1000	DAPI		2020-12-14	No.3

## Sheet: Statistics
Table Analyzed	Data 1		Table Analyzed	Data 1		Table Analyzed	Data 1		Table Analyzed	Data 1		Table Analyzed	Data 1		Table Analyzed	Data 1		Table Analyzed	Data 1
Column B	pMCB306 + sgNCS1#3		Column D	FBF1 KO + sgNCS1#3		Column F	CEP89 KO + sgNCS1#3		Column H	ANKRD26 KO + sgNCS1#3		Column J	INPP5E KO + sgNCS1#3		Column L	KIZ KO + sgNCS1#3		Column N	sgLRRC45 + sgNCS1#3
vs.	vs.		vs.	vs.		vs.	vs.		vs.	vs.		vs.	vs.		vs.	vs.		vs.	vs.
Column A	pMCB306 + sgSafe		Column C	FBF1 KO + sgSafe		Column E	CEP89 KO + sgSafe		Column G	ANKRD26 KO + sgSafe		Column I	INPP5E KO + sgSafe		Column K	KIZ KO + sgSafe		Column M	sgLRRC45 + sgSafe
Unpaired t test with Welch's correction			Unpaired t test with Welch's correction			Unpaired t test with Welch's correction			Unpaired t test with Welch's correction			Unpaired t test with Welch's correction			Unpaired t test with Welch's correction			Unpaired t test with Welch's correction
P value	0.0171		P value	0.0134		P value	0.3989		P value	0.0137		P value	0.0061		P value	0.0247		P value	0.0927
P value summary	*		P value summary	*		P value summary	ns		P value summary	*		P value summary	**		P value summary	*		P value summary	ns
Significantly different (P < 0.05)?	Yes		Significantly different (P < 0.05)?	Yes		Significantly different (P < 0.05)?	No		Significantly different (P < 0.05)?	Yes		Significantly different (P < 0.05)?	Yes		Significantly different (P < 0.05)?	Yes		Significantly different (P < 0.05)?	No
One- or two-tailed P value?	Two-tailed		One- or two-tailed P value?	Two-tailed		One- or two-tailed P value?	Two-tailed		One- or two-tailed P value?	Two-tailed		One- or two-tailed P value?	Two-tailed		One- or two-tailed P value?	Two-tailed		One- or two-tailed P value?	Two-tailed
Welch-corrected t, df	t=4.002, df=3.884		Welch-corrected t, df	t=6.086, df=2.595		Welch-corrected t, df	t=0.9975, df=2.715		Welch-corrected t, df	t=8.164, df=2.045		Welch-corrected t, df	t=7.957, df=2.689		Welch-corrected t, df	t=3.510, df=3.993		Welch-corrected t, df	t=2.855, df=2.209
How big is the difference?			How big is the difference?			How big is the difference?			How big is the difference?			How big is the difference?			How big is the difference?			How big is the difference?
Mean of column A	22.45		Mean of column C	24.18		Mean of column E	10.46		Mean of column G	21.14		Mean of column I	24.85		Mean of column K	15.53		Mean of column M	15.13
Mean of column B	11.67		Mean of column D	8.295		Mean of column F	8.674		Mean of column H	8.285		Mean of column J	7.802		Mean of column L	6.604		Mean of column N	9.66
Difference between means (B - A) ± SEM	-10.78 ± 2.694		Difference between means (D - C) ± SEM	-15.88 ± 2.610		Difference between means (F - E) ± SEM	-1.782 ± 1.786		Difference between means (H - G) ± SEM	-12.86 ± 1.575		Difference between means (J - I) ± SEM	-17.04 ± 2.142		Difference between means (L - K) ± SEM	-8.924 ± 2.542		Difference between means (N - M) ± SEM	-5.470 ± 1.916
95% confidence interval	-18.35 to -3.212		95% confidence interval	-24.97 to -6.793		95% confidence interval	-7.818 to 4.255		95% confidence interval	-19.49 to -6.224		95% confidence interval	-24.33 to -9.757		95% confidence interval	-15.99 to -1.860		95% confidence interval	-13.01 to 2.068
R squared (eta squared)	0.8048		R squared (eta squared)	0.9345		R squared (eta squared)	0.2682		R squared (eta squared)	0.9702		R squared (eta squared)	0.9593		R squared (eta squared)	0.7553		R squared (eta squared)	0.7868
F test to compare variances			F test to compare variances			F test to compare variances			F test to compare variances			F test to compare variances			F test to compare variances			F test to compare variances
F, DFn, Dfd	1.418, 2, 2		F, DFn, Dfd	6.573, 2, 2		F, DFn, Dfd	5.411, 2, 2		F, DFn, Dfd	87.94, 2, 2		F, DFn, Dfd	5.630, 2, 2		F, DFn, Dfd	1.091, 2, 2		F, DFn, Dfd	19.04, 2, 2
P value	0.827		P value	0.2641		P value	0.312		P value	0.0225		P value	0.3017		P value	0.9567		P value	0.0998
P value summary	ns		P value summary	ns		P value summary	ns		P value summary	*		P value summary	ns		P value summary	ns		P value summary	ns
Significantly different (P < 0.05)?	No		Significantly different (P < 0.05)?	No		Significantly different (P < 0.05)?	No		Significantly different (P < 0.05)?	Yes		Significantly different (P < 0.05)?	No		Significantly different (P < 0.05)?	No		Significantly different (P < 0.05)?	No
Data analyzed			Data analyzed			Data analyzed			Data analyzed			Data analyzed			Data analyzed			Data analyzed
Sample size, column A	3		Sample size, column C	3		Sample size, column E	3		Sample size, column G	3		Sample size, column I	3		Sample size, column K	3		Sample size, column M	3
Sample size, column B	3		Sample size, column D	3		Sample size, column F	3		Sample size, column H	3		Sample size, column J	3		Sample size, column L	3		Sample size, column N	3
