# Supplementary material for: Myristoylated Neuronal Calcium Sensor-1 captures the preciliary vesicle at distal appendages
Source: eLife. 2025 Jan 30;14:e85998. doi: 10.7554/eLife.85998 (PMC11984960; doi:10.7554/eLife.85998)
Supplement: Figure 5—figure supplement 1—source data 4. [file elife-85998-fig5-figsupp1-data4.xlsx]

## Sheet: Raw data
+empty				+WT				+E84Q				+E120Q				+E168Q				+E84Q;E120Q				+E84Q;E168Q				+E120Q;E168Q				+E84Q;E120Q;E168Q				sgGFP
	Ciliated	cell counts	ARL13B+ Ac-Tub- dot		Ciliated	cell counts	ARL13B+ Ac-Tub- dot		Ciliated	cell counts	ARL13B+ Ac-Tub- dot		Ciliated	cell counts	ARL13B+ Ac-Tub- dot		Ciliated	cell counts	ARL13B+ Ac-Tub- dot		Ciliated	cell counts	ARL13B+ Ac-Tub- dot		Ciliated	cell counts	ARL13B+ Ac-Tub- dot		Ciliated	cell counts	ARL13B+ Ac-Tub- dot		Ciliated	cell counts	ARL13B+ Ac-Tub- dot	KAN357-12	39	44						RPE-BFP-Cas9 NCS1 KO (pool)	empty	28.3784	32.6772	34.5238
KAN357-1	8	34	1	KAN357-2	31	37		KAN357-5	19	37	1	KAN357-6	28	45		KAN357-7	26	49		KAN357-8	19	51		KAN357-9	18	45		KAN357-10	18	40		KAN357-11	14	43		2	27	37						RPE-BFP-Cas9 NCS1 KO (pool)	nontag NCS1 (long EF)	70.2381	60.7407	60.0806
2	11	33		2	31	42		2	22	38		2	20	45		2	30	52		2	19	44		2	8	39		2	12	37		2	8	28		3	24	37						RPE-BFP-Cas9 NCS1 KO (pool)	nontag NCS1 (short EF)	55.8036	58.5153	61.0294
3	13	42		3	48	58		3	19	33		3	18	33		3	26	42		3	20	49		3	21	39		3	10	37		3	7	36		4	30	38						RPE-BFP-Cas9 NCS1 KO (pool)	nontag NCS1 G2A (short EF)	37.8788	35.2697	37.9167
4	7	36		4	27	39		4	21	36		4	19	42		4	25	42		4	12	32	1	4	13	35		4	24	46		4	15	38		5	35	40						RPE-BFP-Cas9 NCS1 KO (pool)	nontag NCS1 EF1 (short EF)	58.4475	49.5455	53.8136
5	9	35		5	23	40		5	17	34		5	20	32		5	24	38		5	19	42		5	20	48		5	11	32		5	13	40		6	39	45						RPE-BFP-Cas9 NCS1 KO (pool)	nontag NCS1 EF2 (short EF)	54.6939	48.4018	54.4747
6	15	42		6	17	36		6	30	41		6	29	48		6	24	44		6	17	43		6	17	37		6	10	34		6	8	32		7								RPE-BFP-Cas9 NCS1 KO (pool)	nontag NCS1 EF3 (short EF)	58.0524	65.8333	59.3284
7				7				7				7				7				7				7				7				7				8								RPE-BFP-Cas9 NCS1 KO (pool)	nontag NCS1 EF4 (short EF)	40.613	31.1111	41.1523
8				8				8				8				8				8				8				8				8				9								RPE-BFP-Cas9 NCS1 KO (pool)	nontag NCS1 EF5 (short EF)	39.9177	38.1579	42.6087
9				9				9				9				9				9				9				9				9				10								RPE-BFP-Cas9 NCS1 KO (pool)	nontag NCS1 EF6 (short EF)	37.6106	35.865	37.6307
10				10				10				10				10				10				10				10				10					194	241	0					RPE-BFP-Cas9 NCS1 KO (pool)	nontag NCS1 EF7 (short EF)	29.9539	35.0943	42.9104
	63	222	1		177	252	0		128	219	1		134	245	0		155	267	0		106	261	1		97	243	0		85	226	0		65	217	0			80.4979						RPE-BFP-Cas9pMCB306(pool)		80.4979	76.9585	76.9231
		28.3784				70.2381				58.4475				54.6939				58.0524				40.613				39.9177				37.6106				29.9539
	Ciliated	cell counts	ARL13B+ Ac-Tub- dot		Ciliated	cell counts	ARL13B+ Ac-Tub- dot		Ciliated	cell counts	ARL13B+ Ac-Tub- dot		Ciliated	cell counts	ARL13B+ Ac-Tub- dot		Ciliated	cell counts	ARL13B+ Ac-Tub- dot		Ciliated	cell counts	ARL13B+ Ac-Tub- dot		Ciliated	cell counts	ARL13B+ Ac-Tub- dot		Ciliated	cell counts	ARL13B+ Ac-Tub- dot		Ciliated	cell counts	ARL13B+ Ac-Tub- dot		Ciliated	cell counts	ARL13B+ Ac-Tub- dot
KAN359-1	19	38		KAN359-2	30	48		KAN359-5	21	40		KAN359-6	13	32		KAN359-7	36	44		KAN359-8	24	45		KAN359-9	11	36		KAN359-10	21	41		KAN359-11	17	44		KAN359-12	28	36
2	12	40		2	41	59		2	9	35		2	18	35		2	25	44		2	7	33		2	22	43		2	14	37		2	12	48		2	24	34								RPE-BFP-Cas9pMCB306(pool)	RPE-BFP-Cas9 NCS1 KO (pool)	RPE-BFP-Cas9 NCS1 KO (pool)	RPE-BFP-Cas9 NCS1 KO (pool)
3	12	42		3	26	48		3	17	34		3	21	42		3	22	34		3	5	32		3	8	30		3	18	46		3	7	34		3	24	38									empty	nontag NCS1 (long EF)	nontag NCS1 EF1 (short EF)
4	10	41		4	20	39		4	23	43		4	16	36		4	40	48		4	6	35		4	17	44		4	12	38		4	12	43		4	32	38								80.4979	28.3784	70.2381	58.4475
5	12	48		5	21	33		5	14	32		5	14	34		5	21	35		5	16	45		5	17	37		5	10	40		5	21	44		5	26	33								76.9585	32.6772	60.7407	49.5455
6	18	45		6	26	43		6	25	36		6	24	40		6	14	35		6	12	35		6	12	38		6	10	35		6	24	52		6	33	38								76.9231	34.5238	60.0806	53.8136
7				7				7				7				7				7				7				7				7				7
8				8				8				8				8				8				8				8				8				8
9				9				9				9				9				9				9				9				9				9
10				10				10				10				10				10				10				10				10				10
	83	254	0		164	270	0		109	220	0		106	219	0		158	240	0		70	225	0		87	228	0		85	237	0		93	265	0		167	217	0
		32.6772				60.7407				49.5455				48.4018				65.8333				31.1111				38.1579				35.865				35.0943				76.9585
	Ciliated	cell counts	ARL13B+ Ac-Tub- dot		Ciliated	cell counts	ARL13B+ Ac-Tub- dot		Ciliated	cell counts	ARL13B+ Ac-Tub- dot		Ciliated	cell counts	ARL13B+ Ac-Tub- dot		Ciliated	cell counts	ARL13B+ Ac-Tub- dot		Ciliated	cell counts	ARL13B+ Ac-Tub- dot		Ciliated	cell counts	ARL13B+ Ac-Tub- dot		Ciliated	cell counts	ARL13B+ Ac-Tub- dot		Ciliated	cell counts	ARL13B+ Ac-Tub- dot		Ciliated	cell counts	ARL13B+ Ac-Tub- dot
KAN369-1	18	37		KAN369-2	25	47		KAN369-5	25	39		KAN369-6	14	34		KAN369-7	18	35		KAN369-8	17	43		KAN369-9	10	33		KAN369-10	13	37		KAN369-11	21	48		KAN369-12	21	26
2	11	36		2	13	31		2	21	41		2	32	46		2	25	48		2	16	40		2	18	47		2	10	39		2	22	50		2	26	38
3	22	51		3	23	36		3	16	38		3	14	36		3	23	47		3	20	42		3	21	40		3	16	36		3	17	33		3	39	48
4	11	46		4	28	46		4	19	38		4	29	49		4	29	45		4	16	42		4	10	27		4	13	43		4	17	44		4	27	31
5	16	44		5	33	49		5	18	38		5	26	45		5	32	46		5	13	35		5	18	46		5	21	45		5	22	51		5	26	36
6	9	38		6	27	39		6	28	42		6	25	47		6	32	47		6	18	41		6	21	37		6	19	43		6	16	42		6	21	29
7				7				7				7				7				7				7				7	16	44		7				7
8				8				8				8				8				8				8				8				8				8
9				9				9				9				9				9				9				9				9				9
10				10				10				10				10				10				10				10				10				10
	87	252	0		149	248	0		127	236	0		140	257	0		159	268	0		100	243	0		98	230	0		108	287	0		115	268	0		160	208	0
		34.5238				60.0806				53.8136				54.4747				59.3284				41.1523				42.6087				37.6307				42.9104				76.9231
[truncated: 6 more columns]

## Sheet: IF condition
Exp. number	Cell line	Gene induced	Culture condition, fixation condition	rabbit-Alexa488	mouse IgG1-Alexa568	mouse IgG2b-Alexa647	Nuclear stain	Date	Replicate
Replicate 1
KAN357-1	RPE-BFP-Cas9 NCS1 KO (pool)	pWPXLd/FLAG-N/blast/empty	Fixed in 4% PFA/serum starvation for 24 hours	ARL13B, Proteintech, 17711-1-AP, 1:1000	CEP170, Invitrogen, 41-3200, 1:1000	Ac-Tub, 6B-11, SIGMA, 1:2000	DAPI
KAN357-2	RPE-BFP-Cas9 NCS1 KO (pool)	pWPXLd/blast/longEF/nontag NCS1-WT	Fixed in 4% PFA/serum starvation for 24 hours	ARL13B, Proteintech, 17711-1-AP, 1:1000	CEP170, Invitrogen, 41-3200, 1:1000	Ac-Tub, 6B-11, SIGMA, 1:2000	DAPI
KAN357-5	RPE-BFP-Cas9 NCS1 KO (pool)	pWPXLd/blast/shortEF/nontag NCS1 E84Q	Fixed in 4% PFA/serum starvation for 24 hours	ARL13B, Proteintech, 17711-1-AP, 1:1000	CEP170, Invitrogen, 41-3200, 1:1000	Ac-Tub, 6B-11, SIGMA, 1:2000	DAPI
KAN357-6	RPE-BFP-Cas9 NCS1 KO (pool)	pWPXLd/blast/shortEF/nontag NCS1 E120Q	Fixed in 4% PFA/serum starvation for 24 hours	ARL13B, Proteintech, 17711-1-AP, 1:1000	CEP170, Invitrogen, 41-3200, 1:1000	Ac-Tub, 6B-11, SIGMA, 1:2000	DAPI
KAN357-7	RPE-BFP-Cas9 NCS1 KO (pool)	pWPXLd/blast/shortEF/nontag NCS1 E168Q	Fixed in 4% PFA/serum starvation for 24 hours	ARL13B, Proteintech, 17711-1-AP, 1:1000	CEP170, Invitrogen, 41-3200, 1:1000	Ac-Tub, 6B-11, SIGMA, 1:2000	DAPI
KAN357-8	RPE-BFP-Cas9 NCS1 KO (pool)	pWPXLd/blast/shortEF/nontag NCS1 E84Q;E120Q	Fixed in 4% PFA/serum starvation for 24 hours	ARL13B, Proteintech, 17711-1-AP, 1:1000	CEP170, Invitrogen, 41-3200, 1:1000	Ac-Tub, 6B-11, SIGMA, 1:2000	DAPI
KAN357-9	RPE-BFP-Cas9 NCS1 KO (pool)	pWPXLd/blast/shortEF/nontag NCS1 E84Q;E168Q	Fixed in 4% PFA/serum starvation for 24 hours	ARL13B, Proteintech, 17711-1-AP, 1:1000	CEP170, Invitrogen, 41-3200, 1:1000	Ac-Tub, 6B-11, SIGMA, 1:2000	DAPI
KAN357-10	RPE-BFP-Cas9 NCS1 KO (pool)	pWPXLd/blast/shortEF/nontag NCS1 E84Q;E168Q	Fixed in 4% PFA/serum starvation for 24 hours	ARL13B, Proteintech, 17711-1-AP, 1:1000	CEP170, Invitrogen, 41-3200, 1:1000	Ac-Tub, 6B-11, SIGMA, 1:2000	DAPI
KAN357-11	RPE-BFP-Cas9 NCS1 KO (pool)	pWPXLd/blast/shortEF/nontag NCS1 E84Q;E120Q;E168Q	Fixed in 4% PFA/serum starvation for 24 hours	ARL13B, Proteintech, 17711-1-AP, 1:1000	CEP170, Invitrogen, 41-3200, 1:1000	Ac-Tub, 6B-11, SIGMA, 1:2000	DAPI
KAN357-12	RPE-BFP-Cas9pMCB306(pool)		Fixed in 4% PFA/serum starvation for 24 hours	ARL13B, Proteintech, 17711-1-AP, 1:1000	CEP170, Invitrogen, 41-3200, 1:1000	Ac-Tub, 6B-11, SIGMA, 1:2000	DAPI
Replicate 2
KAN359-1	RPE-BFP-Cas9 NCS1 KO (pool)	pWPXLd/FLAG-N/blast/empty	Fixed in 4% PFA/serum starvation for 24 hours	ARL13B, Proteintech, 17711-1-AP, 1:1000	CEP170, Invitrogen, 41-3200, 1:1000	Ac-Tub, 6B-11, SIGMA, 1:2000	DAPI	Experiment No.2
KAN359-2	RPE-BFP-Cas9 NCS1 KO (pool)	pWPXLd/blast/longEF/nontag NCS1-WT	Fixed in 4% PFA/serum starvation for 24 hours	ARL13B, Proteintech, 17711-1-AP, 1:1000	CEP170, Invitrogen, 41-3200, 1:1000	Ac-Tub, 6B-11, SIGMA, 1:2000	DAPI	Experiment No.2
KAN359-5	RPE-BFP-Cas9 NCS1 KO (pool)	pWPXLd/blast/shortEF/nontag NCS1 E84Q	Fixed in 4% PFA/serum starvation for 24 hours	ARL13B, Proteintech, 17711-1-AP, 1:1000	CEP170, Invitrogen, 41-3200, 1:1000	Ac-Tub, 6B-11, SIGMA, 1:2000	DAPI	Experiment No.2
KAN359-6	RPE-BFP-Cas9 NCS1 KO (pool)	pWPXLd/blast/shortEF/nontag NCS1 E120Q	Fixed in 4% PFA/serum starvation for 24 hours	ARL13B, Proteintech, 17711-1-AP, 1:1000	CEP170, Invitrogen, 41-3200, 1:1000	Ac-Tub, 6B-11, SIGMA, 1:2000	DAPI	Experiment No.2
KAN359-7	RPE-BFP-Cas9 NCS1 KO (pool)	pWPXLd/blast/shortEF/nontag NCS1 E168Q	Fixed in 4% PFA/serum starvation for 24 hours	ARL13B, Proteintech, 17711-1-AP, 1:1000	CEP170, Invitrogen, 41-3200, 1:1000	Ac-Tub, 6B-11, SIGMA, 1:2000	DAPI	Experiment No.2
KAN359-8	RPE-BFP-Cas9 NCS1 KO (pool)	pWPXLd/blast/shortEF/nontag NCS1 E84Q;E120Q	Fixed in 4% PFA/serum starvation for 24 hours	ARL13B, Proteintech, 17711-1-AP, 1:1000	CEP170, Invitrogen, 41-3200, 1:1000	Ac-Tub, 6B-11, SIGMA, 1:2000	DAPI	Experiment No.2
KAN359-9	RPE-BFP-Cas9 NCS1 KO (pool)	pWPXLd/blast/shortEF/nontag NCS1 E84Q;E168Q	Fixed in 4% PFA/serum starvation for 24 hours	ARL13B, Proteintech, 17711-1-AP, 1:1000	CEP170, Invitrogen, 41-3200, 1:1000	Ac-Tub, 6B-11, SIGMA, 1:2000	DAPI	Experiment No.2
KAN359-10	RPE-BFP-Cas9 NCS1 KO (pool)	pWPXLd/blast/shortEF/nontag NCS1 E84Q;E168Q	Fixed in 4% PFA/serum starvation for 24 hours	ARL13B, Proteintech, 17711-1-AP, 1:1000	CEP170, Invitrogen, 41-3200, 1:1000	Ac-Tub, 6B-11, SIGMA, 1:2000	DAPI	Experiment No.2
KAN359-11	RPE-BFP-Cas9 NCS1 KO (pool)	pWPXLd/blast/shortEF/nontag NCS1 E84Q;E120Q;E168Q	Fixed in 4% PFA/serum starvation for 24 hours	ARL13B, Proteintech, 17711-1-AP, 1:1000	CEP170, Invitrogen, 41-3200, 1:1000	Ac-Tub, 6B-11, SIGMA, 1:2000	DAPI	Experiment No.2
KAN359-12	RPE-BFP-Cas9pMCB306(pool)		Fixed in 4% PFA/serum starvation for 24 hours	ARL13B, Proteintech, 17711-1-AP, 1:1000	CEP170, Invitrogen, 41-3200, 1:1000	Ac-Tub, 6B-11, SIGMA, 1:2000	DAPI	Experiment No.2

## Sheet: Statistics
Table Analyzed	Data 1		Table Analyzed	Data 1		Table Analyzed	Data 1		Table Analyzed	Data 1		Table Analyzed	Data 1		Table Analyzed	Data 1		Table Analyzed	Data 1		Table Analyzed	Data 1		Table Analyzed	Data 1
Column C	WT		Column C	WT		Column D	E84Q		Column E	E120Q		Column F	E168Q		Column G	E84Q;E120Q		Column H	E84Q;E168Q		Column I	E120Q;E168Q		Column J	E84Q:E120Q;E168Q
vs.	vs.		vs.	vs.		vs.	vs.		vs.	vs.		vs.	vs.		vs.	vs.		vs.	vs.		vs.	vs.		vs.	vs.
Column A	sgGFP (pMCB306)		Column B	empty		Column C	WT		Column C	WT		Column C	WT		Column C	WT		Column C	WT		Column C	WT		Column C	WT
Unpaired t test with Welch's correction			Unpaired t test with Welch's correction			Unpaired t test with Welch's correction			Unpaired t test with Welch's correction			Unpaired t test with Welch's correction			Unpaired t test with Welch's correction			Unpaired t test with Welch's correction			Unpaired t test with Welch's correction			Unpaired t test with Welch's correction
P value	0.0358		P value	0.0029		P value	0.0832		P value	0.0553		P value	0.5585		P value	0.0049		P value	0.0106		P value	0.0127		P value	0.0055
P value summary	*		P value summary	**		P value summary	ns		P value summary	ns		P value summary	ns		P value summary	**		P value summary	*		P value summary	*		P value summary	**
Significantly different (P < 0.05)?	Yes		Significantly different (P < 0.05)?	Yes		Significantly different (P < 0.05)?	No		Significantly different (P < 0.05)?	No		Significantly different (P < 0.05)?	No		Significantly different (P < 0.05)?	Yes		Significantly different (P < 0.05)?	Yes		Significantly different (P < 0.05)?	Yes		Significantly different (P < 0.05)?	Yes
One- or two-tailed P value?	Two-tailed		One- or two-tailed P value?	Two-tailed		One- or two-tailed P value?	Two-tailed		One- or two-tailed P value?	Two-tailed		One- or two-tailed P value?	Two-tailed		One- or two-tailed P value?	Two-tailed		One- or two-tailed P value?	Two-tailed		One- or two-tailed P value?	Two-tailed		One- or two-tailed P value?	Two-tailed
Welch-corrected t, df	t=4.139, df=2.514		Welch-corrected t, df	t=8.481, df=3.125		Welch-corrected t, df	t=2.339, df=3.783		Welch-corrected t, df	t=2.881, df=3.366		Welch-corrected t, df	t=0.6424, df=3.671		Welch-corrected t, df	t=5.634, df=4.000		Welch-corrected t, df	t=6.650, df=2.608		Welch-corrected t, df	t=7.996, df=2.127		Welch-corrected t, df	t=5.545, df=3.926
How big is the difference?			How big is the difference?			How big is the difference?			How big is the difference?			How big is the difference?			How big is the difference?			How big is the difference?			How big is the difference?			How big is the difference?
Mean of column A	78.13		Mean of column B	31.86		Mean of column C	63.69		Mean of column C	63.69		Mean of column C	63.69		Mean of column C	63.69		Mean of column C	63.69		Mean of column C	63.69		Mean of column C	63.69
Mean of column C	63.69		Mean of column C	63.69		Mean of column D	53.94		Mean of column E	52.52		Mean of column F	61.07		Mean of column G	37.63		Mean of column H	40.23		Mean of column I	37.04		Mean of column J	35.99
Difference between means (C - A) ± SEM	-14.44 ± 3.489		Difference between means (C - B) ± SEM	31.83 ± 3.753		Difference between means (D - C) ± SEM	-9.751 ± 4.168		Difference between means (E - C) ± SEM	-11.16 ± 3.875		Difference between means (F - C) ± SEM	-2.615 ± 4.071		Difference between means (G - C) ± SEM	-26.06 ± 4.626		Difference between means (H - C) ± SEM	-23.46 ± 3.527		Difference between means (I - C) ± SEM	-26.65 ± 3.333		Difference between means (J - C) ± SEM	-27.70 ± 4.996
95% confidence interval	-26.86 to -2.016		95% confidence interval	20.15 to 43.50		95% confidence interval	-21.59 to 2.088		95% confidence interval	-22.77 to 0.4445		95% confidence interval	-14.33 to 9.099		95% confidence interval	-38.91 to -13.22		95% confidence interval	-35.70 to -11.21		95% confidence interval	-40.20 to -13.10		95% confidence interval	-41.67 to -13.73
R squared (eta squared)	0.872		R squared (eta squared)	0.9584		R squared (eta squared)	0.5913		R squared (eta squared)	0.7114		R squared (eta squared)	0.1011		R squared (eta squared)	0.8881		R squared (eta squared)	0.9443		R squared (eta squared)	0.9678		R squared (eta squared)	0.8868
F test to compare variances			F test to compare variances			F test to compare variances			F test to compare variances			F test to compare variances			F test to compare variances			F test to compare variances			F test to compare variances			F test to compare variances
F, DFn, Dfd	7.658, 2, 2		F, DFn, Dfd	3.249, 2, 2		F, DFn, Dfd	1.630, 2, 2		F, DFn, Dfd	2.533, 2, 2		F, DFn, Dfd	1.855, 2, 2		F, DFn, Dfd	1.013, 2, 2		F, DFn, Dfd	6.429, 2, 2		F, DFn, Dfd	31.44, 2, 2		F, DFn, Dfd	1.318, 2, 2
P value	0.231		P value	0.4707		P value	0.7606		P value	0.5661		P value	0.7006		P value	0.9938		P value	0.2692		P value	0.0617		P value	0.8629
P value summary	ns		P value summary	ns		P value summary	ns		P value summary	ns		P value summary	ns		P value summary	ns		P value summary	ns		P value summary	ns		P value summary	ns
Significantly different (P < 0.05)?	No		Significantly different (P < 0.05)?	No		Significantly different (P < 0.05)?	No		Significantly different (P < 0.05)?	No		Significantly different (P < 0.05)?	No		Significantly different (P < 0.05)?	No		Significantly different (P < 0.05)?	No		Significantly different (P < 0.05)?	No		Significantly different (P < 0.05)?	No
Data analyzed			Data analyzed			Data analyzed			Data analyzed			Data analyzed			Data analyzed			Data analyzed			Data analyzed			Data analyzed
Sample size, column A	3		Sample size, column B	3		Sample size, column C	3		Sample size, column C	3		Sample size, column C	3		Sample size, column C	3		Sample size, column C	3		Sample size, column C	3		Sample size, column C	3
Sample size, column C	3		Sample size, column C	3		Sample size, column D	3		Sample size, column E	3		Sample size, column F	3		Sample size, column G	3		Sample size, column H	3		Sample size, column I	3		Sample size, column J	3
