# Supplementary material for: Myristoylated Neuronal Calcium Sensor-1 captures the preciliary vesicle at distal appendages
Source: eLife. 2025 Jan 30;14:e85998. doi: 10.7554/eLife.85998 (PMC11984960; doi:10.7554/eLife.85998)
Supplement: Figure 5—source data 6. [file elife-85998-fig5-data6.xlsx]

## Sheet: Replicate 1
	Label	Area	Mean	Min	Max	X	Y	Circ	IntDen	RawIntDen	AR	Round	Solidity
271	NCS1_KAN358-1_1.tif:0001-0081	1.059	2.208	0	9	101.276	8.341	0.917	2.337	223	1.141	0.876	0.898	0.0186757
272	NCS1_KAN358-1_1.tif:0002-0168	1.069	2.078	0	9	71.217	17.163	0.909	2.222	212	1.274	0.785	0.936	0.0177545
273	NCS1_KAN358-1_1.tif:0003-0307	1.048	7.08	0	47	102.411	31.454	0.937	7.421	708	1.032	0.969	0.913	0.0592933
274	NCS1_KAN358-1_1.tif:0004-0437	0.922	2.58	0	13	68.689	44.736	0.982	2.379	227	1.099	0.91	0.946	0.0190107
275	NCS1_KAN358-1_1.tif:0005-0535	0.985	2.926	0	41	33.908	54.797	0.892	2.883	275	1.296	0.772	0.895	0.0230306
276	NCS1_KAN358-1_1.tif:0006-0599	1.195	2.316	0	11	108.329	61.323	0.868	2.767	264	1.317	0.76	0.884	0.0221094
277	NCS1_KAN358-1_1.tif:0007-0602	0.88	3.524	0	23	77.694	61.615	0.937	3.103	296	1.045	0.957	0.928	0.0247893
278	NCS1_KAN358-1_1.tif:0008-0804	1.08	2.796	0	13	113.846	82.273	0.923	3.019	288	1.053	0.95	0.896	0.0241193
279	NCS1_KAN358-1_1.tif:0009-0886	1.059	2.515	0	12	137.583	90.774	0.836	2.662	254	1.49	0.671	0.906	0.0212719
280	NCS1_KAN358-1_1.tif:0010-0909	1.059	2.228	0	11	83.576	93.16	0.888	2.358	225	1.371	0.729	0.91	0.0188432
281	NCS1_KAN358-1_2.tif:0001-0019	1.226	2.282	0	11	99.659	1.921	0.842	2.799	267	1.081	0.925	0.89	0.0223606
282	NCS1_KAN358-1_2.tif:0002-0133	1.111	2.311	0	11	85.262	13.673	0.962	2.568	245	1.056	0.947	0.93	0.0205182
283	NCS1_KAN358-1_2.tif:0003-0198	0.964	2.5	0	12	63.719	20.258	0.978	2.411	230	1.106	0.904	0.934	0.019262
284	NCS1_KAN358-1_2.tif:0004-0301	1.184	3.619	0	23	82.984	30.779	0.969	4.287	409	1.127	0.887	0.919	0.0342528
285	NCS1_KAN358-1_2.tif:0005-0368	1.006	2.667	0	14	66.185	37.741	0.941	2.683	256	1.372	0.729	0.937	0.0214394
286	NCS1_KAN358-1_2.tif:0006-0407	1.195	13.333	0	99	115.083	41.755	0.878	15.932	1520	1.376	0.727	0.927	0.127296
287	NCS1_KAN358-1_2.tif:0007-0415	1.111	3.745	0	33	35.977	42.498	0.831	4.161	397	1.33	0.752	0.862	0.0332478
288	NCS1_KAN358-1_2.tif:0008-0418	1.258	2.125	0	9	7.997	42.763	0.877	2.673	255	1.134	0.882	0.886	0.0213557
289	NCS1_KAN358-1_2.tif:0009-0548	1.499	2.196	0	14	28.643	56.007	0.76	3.291	314	1.59	0.629	0.872	0.0262968
290	NCS1_KAN358-1_2.tif:0010-0671	1.059	2.812	0	15	87.125	68.71	0.959	2.977	284	1.112	0.899	0.948	0.0237843
291	NCS1_KAN358-1_2.tif:0011-0713	1.268	2.438	0	11	54.722	73.023	0.921	3.092	295	1.265	0.791	0.927	0.0247056
292	NCS1_KAN358-1_2.tif:0012-0777	1.279	2.943	0	13	131.25	79.584	0.94	3.763	359	1.261	0.793	0.953	0.0300654
293	NCS1_KAN358-1_2.tif:0013-0800	0.996	3.074	0	14	9.753	81.982	0.944	3.061	292	1.29	0.775	0.955	0.0244543
294	NCS1_KAN358-1_2.tif:0014-0881	0.943	2.611	0	12	13.154	90.249	0.943	2.463	235	1.143	0.875	0.914	0.0196807
295	NCS1_KAN358-1_2.tif:0015-0897	1.101	3.848	0	19	110.523	91.854	0.965	4.235	404	1.078	0.928	0.95	0.0338341
296	NCS1_KAN358-1_2.tif:0016-0922	1.268	2.736	0	9	33.977	94.438	0.846	3.469	331	1.582	0.632	0.91	0.0277205
297	NCS1_KAN358-1_2.tif:0017-0948	1.08	3.311	0	15	92.381	97.047	0.878	3.574	341	1.192	0.839	0.912	0.028558
298	NCS1_KAN358-1_3.tif:0001-0006	0.891	2.082	0	14	49.13	0.664	0.873	1.855	177	1.527	0.655	0.904	0.0148233
299	NCS1_KAN358-1_3.tif:0002-0074	0.88	2.048	0	10	97.107	7.586	0.957	1.803	172	1.175	0.851	0.908	0.0144046
300	NCS1_KAN358-1_3.tif:0003-0145	0.88	1.857	0	12	39.386	14.911	0.937	1.635	156	1.157	0.864	0.933	0.0130646
301	NCS1_KAN358-1_3.tif:0004-0232	1.122	6.523	0	66	116.298	23.769	0.896	7.316	698	1.103	0.907	0.955	0.0584559
302	NCS1_KAN358-1_3.tif:0005-0256	0.87	2.482	0	10	1.45	26.209	0.995	2.159	206	1.068	0.937	0.933	0.017252
303	NCS1_KAN358-1_3.tif:0006-0371	1.143	3.532	0	17	88.776	38.06	0.918	4.036	385	1.35	0.741	0.924	0.0322428
304	NCS1_KAN358-1_3.tif:0007-0404	1.08	2.068	0	10	46.671	41.42	0.906	2.233	213	1.342	0.745	0.92	0.0178383
305	NCS1_KAN358-1_3.tif:0008-0404	1.048	6.19	0	33	14.171	41.424	0.907	6.488	619	1.072	0.933	0.905	0.0518398
306	NCS1_KAN358-1_3.tif:0009-0416	1.111	2.075	0	11	54.796	42.555	0.916	2.306	220	1.251	0.799	0.955	0.0184245
307	NCS1_KAN358-1_3.tif:0010-0438	1.122	2.467	0	11	117.513	44.943	0.874	2.767	264	1.384	0.722	0.899	0.0221094
308	NCS1_KAN358-1_3.tif:0011-0588	1.268	3.017	0	15	133.426	60.236	0.921	3.826	365	1.348	0.742	0.924	0.0305679
309	NCS1_KAN358-1_3.tif:0012-0645	1.017	2.309	0	10	94.338	66.068	0.864	2.348	224	1.472	0.68	0.919	0.0187595
310	NCS1_KAN358-1_3.tif:0013-0660	1.153	2.6	0	14	52.162	67.599	0.955	2.998	286	1.166	0.858	0.917	0.0239518
311	NCS1_KAN358-1_3.tif:0014-0855	1.027	3.092	0	15	58.227	87.529	0.961	3.176	303	1.222	0.819	0.933	0.0253755
312	NCS1_KAN358-1_3.tif:0015-0921	1.31	10.872	0	80	94.17	94.404	0.879	14.245	1359	1.344	0.744	0.909	0.113813
313	NCS1_KAN358-1_3.tif:0016-0964	1.101	2.61	0	12	35.119	98.747	0.912	2.872	274	1.287	0.777	0.909	0.0229469
314	NCS1_KAN358-1_3.tif:0017-0982	0.933	3.18	0	26	9.18	100.539	0.946	2.966	283	1.256	0.796	0.932	0.0237006
315	NCS1_KAN358-1_3.tif:0018-0990	1.048	2.87	0	11	138.331	101.402	0.907	3.008	287	1.173	0.853	0.909	0.0240356
316	NCS1_KAN358-1_4.tif:0001-0034	1.048	2.26	0	15	112.702	3.531	0.949	2.369	226	1.027	0.974	0.93	0.018927
317	NCS1_KAN358-1_4.tif:0002-0050	0.922	3.886	0	30	82.26	5.135	0.935	3.585	342	1.112	0.899	0.917	0.0286417
318	NCS1_KAN358-1_4.tif:0003-0103	1.258	2.95	0	14	130.1	10.587	0.898	3.711	354	1.379	0.725	0.941	0.0296467
319	NCS1_KAN358-1_4.tif:0004-0197	0.891	2.612	0	12	46.643	20.14	0.873	2.327	222	1.252	0.799	0.904	0.018592
320	NCS1_KAN358-1_4.tif:0005-0213	0.839	3.725	0	17	85.128	21.787	1	3.124	298	1.092	0.916	0.952	0.0249568
321	NCS1_KAN358-1_4.tif:0006-0257	1.08	7.243	0	61	101.403	26.314	0.965	7.819	746	1.158	0.864	0.924	0.0624758
322	NCS1_KAN358-1_4.tif:0007-0369	1.069	4.108	0	14	116.903	37.768	0.909	4.392	419	1.225	0.816	0.958	0.0350903
323	NCS1_KAN358-1_4.tif:0008-0457	1.059	2.812	0	22	48.604	46.747	0.946	2.977	284	1.3	0.769	0.927	0.0237843
324	NCS1_KAN358-1_4.tif:0009-0466	0.975	4.376	0	23	76.661	47.774	0.975	4.266	407	1.228	0.815	0.921	0.0340853
325	NCS1_KAN358-1_4.tif:0010-0523	1.279	2.73	0	17	21.787	53.602	0.903	3.49	333	1.547	0.646	0.935	0.027888
326	NCS1_KAN358-1_4.tif:0011-0603	0.943	2.6	0	11	66.231	61.82	0.99	2.453	234	1.109	0.902	0.938	0.019597
327	NCS1_KAN358-1_4.tif:0012-0655	1.289	2.26	0	12	121.767	67.083	0.936	2.914	278	1.148	0.871	0.921	0.0232818
328	NCS1_KAN358-1_4.tif:0013-0671	0.87	2.096	0	11	54.156	68.756	0.882	1.824	174	1.241	0.806	0.897	0.0145721
329	NCS1_KAN358-1_4.tif:0014-0745	1.226	2.462	0	11	130.415	76.259	0.891	3.019	288	1.212	0.825	0.914	0.0241193
330	NCS1_KAN358-1_4.tif:0015-0781	1.163	2.757	0	11	85.889	79.989	0.964	3.207	306	1.182	0.846	0.921	0.0256268
331	NCS1_KAN358-1_4.tif:0016-0797	1.132	4.352	0	53	10.349	81.607	0.938	4.926	470	1.145	0.874	0.915	0.0393614
332	NCS1_KAN358-1_4.tif:0017-0827	1.048	2.41	0	18	15.306	84.719	0.919	2.526	241	1.437	0.696	0.939	0.0201832
333	NCS1_KAN358-1_4.tif:0018-0858	1.09	2.529	0	13	10.798	87.842	0.887	2.757	263	1.616	0.619	0.929	0.0220256
334	NCS1_KAN358-1_4.tif:0019-0894	1.237	4	0	17	128.525	91.608	0.859	4.947	472	1.284	0.779	0.922	0.0395289
335	NCS1_KAN358-1_4.tif:0020-0976	1.038	2.475	0	12	35.294	99.952	0.94	2.568	245	1.249	0.801	0.943	0.0205182
336	NCS1_KAN358-1_4.tif:0021-0979	1.205	2.017	0	11	52.35	100.314	0.841	2.432	232	1.256	0.796	0.865	0.0194295
										344.409				0.0288435
337	NCS1_KAN358-2_1.tif:0001-0152	1.111	68.764	0	308	80.666	15.599	0.762	76.402	7289	1.911	0.523	0.872	0.610437
338	NCS1_KAN358-2_1.tif:0002-0217	1.09	69.538	0	409	113.795	22.175	0.944	75.805	7232	1.286	0.778	0.929	0.605663
339	NCS1_KAN358-2_1.tif:0003-0277	1.059	144.723	0	614	82.339	28.356	0.912	153.213	14617	1.342	0.745	0.976	1.22414
340	NCS1_KAN358-2_1.tif:0004-0287	0.964	79.424	0	573	0.751	29.441	0.897	76.591	7307	1.259	0.794	0.968	0.611944
341	NCS1_KAN358-2_1.tif:0005-0517	1.394	74.293	0	471	18.939	52.934	0.75	103.571	9881	1.807	0.553	0.89	0.827511
342	NCS1_KAN358-2_1.tif:0006-0635	1.184	99.531	0	733	108.845	65.003	0.86	117.889	11247	1.354	0.739	0.886	0.94191
343	NCS1_KAN358-2_1.tif:0007-0738	0.839	107.075	0	473	20.716	75.549	0.906	89.788	8566	1.211	0.826	0.941	0.717382
344	NCS1_KAN358-2_1.tif:0008-0790	0.901	262.372	0	1130	122.735	80.905	0.927	236.513	22564	1.245	0.803	0.95	1.88968
345	NCS1_KAN358-2_1.tif:0009-0857	0.943	43.5	0	198	76.876	87.773	0.957	41.036	3915	1.083	0.923	0.923	0.327872
346	NCS1_KAN358-2_1.tif:0010-0921	1.342	159.844	0	1104	109.677	94.335	0.816	214.459	20460	1.75	0.571	0.905	1.71348
347	NCS1_KAN358-2_1.tif:0011-0975	1.258	110.417	0	727	123.261	99.827	0.981	138.885	13250	1.008	0.992	0.938	1.10966
348	NCS1_KAN358-2_1.tif:0012-1012	1.384	68.932	0	540	12.668	103.589	0.855	95.374	9099	1.449	0.69	0.886	0.76202
349	NCS1_KAN358-2_2.tif:0001-0100	0.933	14.303	0	144	29.282	10.308	0.979	13.343	1273	1.086	0.92	0.932	0.106611
350	NCS1_KAN358-2_2.tif:0002-0120	1.122	25.523	0	259	121.723	12.239	0.929	28.626	2731	1.455	0.687	0.922	0.228715
351	NCS1_KAN358-2_2.tif:0003-0196	0.849	294.543	0	1645	87.964	20.014	0.816	250.076	23858	1.643	0.609	0.931	1.99805
352	NCS1_KAN358-2_2.tif:0004-0204	1.384	93.765	0	572	60.384	20.801	0.803	129.734	12377	1.166	0.858	0.874	1.03654
353	NCS1_KAN358-2_2.tif:0005-0231	0.922	409.716	0	2069	93.648	23.626	0.863	377.923	36055	1.754	0.57	0.912	3.01952
354	NCS1_KAN358-2_2.tif:0006-0231	1.321	75.198	0	348	84.845	23.73	0.804	99.316	9475	1.513	0.661	0.89	0.793509
355	NCS1_KAN358-2_2.tif:0007-0333	1.08	96.058	0	399	128.02	34.026	0.878	103.708	9894	1.327	0.753	0.928	0.828599
356	NCS1_KAN358-2_2.tif:0008-0335	1.048	56.15	0	352	15.327	34.356	0.981	58.856	5615	1.205	0.83	0.939	0.470243
357	NCS1_KAN358-2_2.tif:0009-0336	1.614	86.786	0	629	138.344	34.425	0.838	140.09	13365	1.589	0.629	0.893	1.11929
358	NCS1_KAN358-2_2.tif:0010-0375	1.195	25.684	0	118	109.163	38.361	0.853	30.691	2928	1.471	0.68	0.923	0.245213
359	NCS1_KAN358-2_2.tif:0011-0452	1.132	106	0	540	26.586	46.299	0.921	119.996	11448	1.161	0.861	0.931	0.958743
360	NCS1_KAN358-2_2.tif:0012-0544	1.3	77.605	0	443	80.722	55.709	0.882	100.867	9623	1.364	0.733	0.889	0.805904
361	NCS1_KAN358-2_2.tif:0013-0567	1.038	123.505	0	459	136.072	58.044	0.91	128.162	12227	1.279	0.782	0.93	1.02398
362	NCS1_KAN358-2_2.tif:0014-0625	1.059	48.267	0	395	45.141	63.974	0.959	51.099	4875	1.163	0.86	0.94	0.40827
363	NCS1_KAN358-2_2.tif:0015-0636	1.3	63.524	0	353	13.043	65.15	0.803	82.566	7877	1.597	0.626	0.858	0.65968
364	NCS1_KAN358-2_2.tif:0016-0724	0.912	227.057	3	1045	123.506	74.073	0.742	207.059	19754	1.786	0.56	0.845	1.65435
365	NCS1_KAN358-2_2.tif:0017-0778	1.457	101.324	0	727	27.849	79.688	0.901	147.627	14084	1.262	0.792	0.908	1.1795
366	NCS1_KAN358-2_2.tif:0018-0820	1.488	87.866	0	543	140.831	84.024	0.773	130.782	12477	1.827	0.547	0.893	1.04492
367	NCS1_KAN358-2_2.tif:0019-0826	1.405	78.91	0	542	90.438	84.608	0.892	110.835	10574	1.369	0.731	0.902	0.885548
368	NCS1_KAN358-2_2.tif:0020-0845	1.048	51.79	0	271	71.2	86.502	0.853	54.286	5179	1.389	0.72	0.901	0.433729
369	NCS1_KAN358-2_2.tif:0021-0965	0.901	230.291	16	944	69.779	98.86	0.994	207.593	19805	1.293	0.773	0.95	1.65862
370	NCS1_KAN358-2_2.tif:0022-0997	1.247	68.168	0	413	119.607	102.077	0.832	85.029	8112	1.203	0.831	0.905	0.679361
371	NCS1_KAN358-2_2.tif:0023-1011	1.237	61.144	0	345	139.983	103.493	0.803	75.627	7215	1.713	0.584	0.915	0.604239
372	NCS1_KAN358-2_2.tif:0024-1020	1.143	202.275	9	824	123.937	104.488	0.677	231.104	22048	2.229	0.449	0.845	1.84647
373	NCS1_KAN358-2_3.tif:0001-0084	1.415	98.756	0	783	84.702	8.636	0.884	139.744	13332	1.486	0.673	0.922	1.11652
374	NCS1_KAN358-2_3.tif:0002-0106	0.996	47.242	0	210	19.297	10.886	0.963	47.043	4488	1.219	0.821	0.922	0.375859
375	NCS1_KAN358-2_3.tif:0003-0122	0.87	14.928	0	65	139.574	12.502	0.841	12.987	1239	1.7	0.588	0.888	0.103763
376	NCS1_KAN358-2_3.tif:0004-0212	1.153	66.836	0	393	112.797	21.691	0.791	77.063	7352	1.25	0.8	0.849	0.615713
377	NCS1_KAN358-2_3.tif:0005-0288	1.163	131.676	0	533	111.539	29.595	0.776	153.203	14616	1.501	0.666	0.857	1.22406
378	NCS1_KAN358-2_3.tif:0006-0332	0.901	84.093	0	375	119.413	33.955	1	75.805	7232	1.095	0.913	0.93	0.605663
379	NCS1_KAN358-2_3.tif:0007-0431	1.017	68.619	0	268	34.94	44.166	0.951	69.767	6656	1.074	0.931	0.928	0.557424
380	NCS1_KAN358-2_3.tif:0008-0461	1.363	70.392	0	526	56.943	47.226	0.865	95.919	9151	1.513	0.661	0.906	0.766375
381	NCS1_KAN358-2_3.tif:0009-0484	1.31	65.048	0	465	72.16	49.537	0.789	85.228	8131	1.199	0.834	0.85	0.680952
382	NCS1_KAN358-2_3.tif:0010-0602	1.646	75.14	0	880	121.234	61.659	0.815	123.654	11797	1.204	0.831	0.872	0.987971
383	NCS1_KAN358-2_3.tif:0011-0605	0.954	37.308	0	180	24.755	61.985	0.935	35.586	3395	1.419	0.705	0.933	0.284323
384	NCS1_KAN358-2_3.tif:0012-0706	1.363	86.469	0	632	112.238	72.335	0.791	117.827	11241	1.225	0.816	0.872	0.941407
385	NCS1_KAN358-2_3.tif:0013-0800	0.996	103.621	0	493	100.392	81.932	0.944	103.183	9844	1.171	0.854	0.941	0.824412
386	NCS1_KAN358-2_3.tif:0014-0805	1.132	25.657	0	211	10.53	82.414	0.832	29.045	2771	1.5	0.667	0.896	0.232065
387	NCS1_KAN358-2_3.tif:0015-0805	0.87	24.627	0	79	46.796	82.416	0.841	21.425	2044	1.844	0.542	0.869	0.17118
388	NCS1_KAN358-2_3.tif:0016-0957	1.122	165.43	2	311	33.979	97.987	0.701	185.539	17701	1.895	0.528	0.817	1.48242
389	NCS1_KAN358-2_3.tif:0017-1026	1.394	55.579	0	457	18.561	105.038	0.899	77.482	7392	1.43	0.699	0.905	0.619063
390	NCS1_KAN358-2_4.tif:0001-0093	0.88	69.298	0	333	42.211	9.536	0.748	61.015	5821	2.056	0.486	0.862	0.487495
391	NCS1_KAN358-2_4.tif:0002-0107	1.499	187.455	0	1021	127.477	11.035	0.902	280.977	26806	1.571	0.637	0.938	2.24494
392	NCS1_KAN358-2_4.tif:0003-0159	1.226	68.154	0	468	104.787	16.248	0.866	83.582	7974	1.54	0.65	0.907	0.667804
393	NCS1_KAN358-2_4.tif:0004-0171	0.912	70.874	0	200	80.887	17.492	0.971	64.631	6166	1.112	0.899	0.946	0.516388
394	NCS1_KAN358-2_4.tif:0005-0204	0.86	44.561	0	231	47.761	20.886	0.997	38.301	3654	1.154	0.867	0.965	0.306014
395	NCS1_KAN358-2_4.tif:0006-0231	0.943	8.3	0	50	73.838	23.628	0.925	7.83	747	1.221	0.819	0.928	0.0625595
396	NCS1_KAN358-2_4.tif:0007-0515	1.08	7.825	0	47	97.269	52.757	0.965	8.448	806	1.202	0.832	0.924	0.0675006
397	NCS1_KAN358-2_4.tif:0008-0603	1.184	60.212	0	466	73.469	61.762	0.846	71.319	6804	1.321	0.757	0.897	0.569819
398	NCS1_KAN358-2_4.tif:0009-0764	0.985	3.894	0	21	16.728	78.258	0.812	3.836	366	1.595	0.627	0.891	0.0306516
399	NCS1_KAN358-2_4.tif:0010-0848	0.88	222.81	4	762	96.94	86.812	0.906	196.178	18716	1.341	0.746	0.944	1.56742
400	NCS1_KAN358-2_4.tif:0011-0910	0.964	3.859	0	22	31.015	93.162	0.964	3.721	355	1.159	0.863	0.906	0.0297304
401	NCS1_KAN358-2_4.tif:0012-0978	1.08	97.058	0	584	78.814	100.151	0.852	104.787	9997	1.107	0.903	0.907	0.837225
402	NCS1_KAN358-2_5.tif:0001-0072	1.143	67.541	0	413	8.34	7.453	0.84	77.167	7362	1.607	0.622	0.912	0.61655
403	NCS1_KAN358-2_5.tif:0002-0116	1.163	67.667	0	455	36.743	11.949	0.947	78.729	7511	1.128	0.886	0.937	0.629029
404	NCS1_KAN358-2_5.tif:0003-0131	0.839	7.388	0	26	68.716	13.38	0.925	6.195	591	1.095	0.913	0.909	0.0494949
405	NCS1_KAN358-2_5.tif:0004-0164	1.247	94.21	0	496	54.879	16.782	0.88	117.512	11211	1.51	0.662	0.926	0.938895
406	NCS1_KAN358-2_5.tif:0005-0213	1.247	81.782	0	457	91.883	21.877	0.832	102.009	9732	1.812	0.552	0.933	0.815032
407	NCS1_KAN358-2_5.tif:0006-0254	0.86	45.878	0	234	33.706	25.986	0.948	39.433	3762	1.28	0.781	0.937	0.315059
408	NCS1_KAN358-2_5.tif:0007-0312	1.195	69.439	0	318	109.58	32.046	0.868	82.974	7916	1.173	0.852	0.905	0.662946
409	NCS1_KAN358-2_5.tif:0008-0378	0.839	181.463	0	622	108.258	38.722	0.939	152.165	14517	1.175	0.851	0.952	1.21576
410	NCS1_KAN358-2_5.tif:0009-0386	1.111	46.396	0	361	41.137	39.472	0.904	51.55	4918	1.411	0.709	0.938	0.411871
411	NCS1_KAN358-2_5.tif:0010-0439	0.922	59.034	0	310	132.716	44.902	0.784	54.453	5195	1.503	0.665	0.867	0.435069
412	NCS1_KAN358-2_5.tif:0011-0471	0.912	268.69	0	1345	25.272	48.21	0.785	245.024	23376	1.779	0.562	0.926	1.95769
413	NCS1_KAN358-2_5.tif:0012-0530	1.813	232.139	0	1262	101.072	54.265	0.713	420.951	40160	1.797	0.556	0.859	3.36331
414	NCS1_KAN358-2_5.tif:0013-0541	1.143	101.101	0	698	77.1	55.438	0.913	115.51	11020	1.18	0.847	0.969	0.922899
415	NCS1_KAN358-2_5.tif:0014-0567	1.635	152.308	0	887	117.125	58.01	0.829	249.049	23760	1.529	0.654	0.891	1.98984
416	NCS1_KAN358-2_5.tif:0015-0605	1.163	109.622	0	411	82.315	61.956	0.935	127.543	12168	1.273	0.785	0.921	1.01904
417	NCS1_KAN358-2_5.tif:0016-0654	0.996	11.284	0	58	20.589	66.951	0.902	11.237	1072	1.253	0.798	0.909	0.0897775
418	NCS1_KAN358-2_5.tif:0017-0654	1.153	75.882	0	348	26.868	66.975	0.938	87.492	8347	1.164	0.859	0.936	0.699042
419	NCS1_KAN358-2_5.tif:0018-0702	1.111	358.245	0	1566	109.947	71.921	0.962	398.038	37974	1.309	0.764	0.938	3.18023
420	NCS1_KAN358-2_5.tif:0019-0724	1.331	106.835	0	800	136.618	74.172	0.878	142.218	13568	1.452	0.689	0.91	1.13629
421	NCS1_KAN358-2_5.tif:0020-0875	1.017	56.515	0	264	87.284	89.602	0.983	57.462	5482	1.104	0.906	0.928	0.459105
422	NCS1_KAN358-2_5.tif:0021-0935	1.122	9.57	0	38	58.516	95.79	0.849	10.733	1024	1.717	0.583	0.899	0.0857576
423	NCS1_KAN358-2_5.tif:0022-0954	1.625	89.665	0	922	121.501	97.676	0.816	145.677	13898	1.766	0.566	0.904	1.16392
424	NCS1_KAN358-2_5.tif:0023-0980	1.101	125.181	0	636	20.325	100.39	0.924	137.774	13144	1.104	0.906	0.917	1.10078
425	NCS1_KAN358-2_6.tif:0001-0022	1.216	49.595	0	420	95.889	2.259	0.695	60.302	5753	2.206	0.453	0.856	0.4818
426	NCS1_KAN358-2_6.tif:0002-0171	0.933	50.685	0	257	93.542	17.556	0.897	47.284	4511	1.313	0.761	0.952	0.377786
427	NCS1_KAN358-2_6.tif:0003-0405	1.069	85.735	0	364	23.355	41.42	0.938	91.664	8745	1.153	0.867	0.936	0.732373
428	NCS1_KAN358-2_6.tif:0004-0438	1.247	71.739	0	485	8.272	44.854	0.88	89.484	8537	1.413	0.708	0.912	0.714954
429	NCS1_KAN358-2_6.tif:0005-0437	1.216	13.181	0	59	115.04	44.748	0.936	16.027	1529	1.239	0.807	0.899	0.12805
430	NCS1_KAN358-2_6.tif:0006-0497	1.279	73.869	0	361	62.174	50.867	0.903	94.463	9012	1.143	0.875	0.9	0.754734
431	NCS1_KAN358-2_6.tif:0007-0595	1.363	65.031	0	445	104.587	60.91	0.799	88.614	8454	1.657	0.604	0.887	0.708003
432	NCS1_KAN358-2_6.tif:0008-0627	1.216	91.397	0	471	43.776	64.208	0.894	111.129	10602	1.296	0.771	0.935	0.887893
433	NCS1_KAN358-2_6.tif:0009-0666	0.964	126.696	0	715	4.449	68.202	0.846	122.177	11656	1.267	0.789	0.902	0.976163
434	NCS1_KAN358-2_6.tif:0010-0721	1.331	70.079	0	354	77.134	73.799	0.967	93.289	8900	1.099	0.91	0.927	0.745354
435	NCS1_KAN358-2_6.tif:0011-0742	0.922	3.648	0	23	31.751	75.939	0.949	3.365	321	1.046	0.956	0.951	0.026883
436	NCS1_KAN358-2_6.tif:0012-0785	1.111	150.217	0	616	103.373	80.39	0.962	166.903	15923	1.121	0.892	0.926	1.33351
437	NCS1_KAN358-2_6.tif:0013-0790	1.122	80.626	0	424	120.89	80.92	0.901	90.427	8627	1.49	0.671	0.915	0.722491
438	NCS1_KAN358-2_6.tif:0014-0847	1.153	43.791	0	277	47.364	86.72	0.837	50.491	4817	1.404	0.712	0.876	0.403412
439	NCS1_KAN358-2_6.tif:0015-0922	1.289	73.919	0	633	137.356	94.461	0.828	95.301	9092	1.441	0.694	0.882	0.761434
440	NCS1_KAN358-2_6.tif:0016-1023	1.342	141.375	0	948	93.805	104.743	0.91	189.68	18096	1.168	0.856	0.914	1.5155
441	NCS1_KAN358-2_6.tif:0017-1033	0.88	52.536	0	381	37.247	105.918	0.655	46.256	4413	1.998	0.5	0.824	0.369578
442	NCS1_KAN358-2_7.tif:0001-0123	0.964	57.772	0	313	66.003	12.677	0.914	55.711	5315	1.436	0.696	0.944	0.445119
443	NCS1_KAN358-2_7.tif:0002-0157	1.006	59.698	0	376	99.269	16.18	0.871	60.072	5731	1.566	0.639	0.901	0.479958
444	NCS1_KAN358-2_7.tif:0003-0253	1.488	202.514	0	448	94.308	25.942	0.72	301.427	28757	1.856	0.539	0.866	2.40833
445	NCS1_KAN358-2_7.tif:0004-0265	0.901	3.244	0	15	42.171	27.188	0.98	2.924	279	1.191	0.839	0.915	0.0233656
446	NCS1_KAN358-2_7.tif:0005-0367	0.87	11.964	0	48	78.09	37.603	0.926	10.408	993	1.214	0.823	0.927	0.0831614
447	NCS1_KAN358-2_7.tif:0006-0398	1.09	3.192	0	15	121.898	40.831	0.898	3.48	332	1.508	0.663	0.959	0.0278042
448	NCS1_KAN358-2_7.tif:0007-0451	1.3	101.855	0	539	16.61	46.162	0.821	132.386	12630	1.295	0.772	0.905	1.05773
449	NCS1_KAN358-2_7.tif:0008-0462	0.943	65.9	0	329	43.419	47.318	0.957	62.168	5931	1.323	0.756	0.928	0.496707
450	NCS1_KAN358-2_7.tif:0009-0551	1.321	98.619	0	661	91.635	56.45	0.858	130.248	12426	1.357	0.737	0.913	1.04065
451	NCS1_KAN358-2_7.tif:0010-0728	0.849	32.444	0	173	61.286	74.626	0.832	27.546	2628	1.745	0.573	0.9	0.220089
452	NCS1_KAN358-2_7.tif:0011-0757	1.09	7.183	0	59	129.991	77.493	0.887	7.83	747	1.414	0.707	0.924	0.0625595
453	NCS1_KAN358-2_7.tif:0012-0861	1.394	78.902	0	604	12.466	88.241	0.797	109.997	10494	1.791	0.558	0.89	0.878848
454	NCS1_KAN358-2_7.tif:0013-0901	0.922	9.818	0	59	76.28	92.277	0.935	9.056	864	1.246	0.803	0.926	0.072358
455	NCS1_KAN358-2_7.tif:0014-0922	1.237	141.288	0	754	96.523	94.454	0.859	174.754	16672	1.417	0.706	0.933	1.39624
456	NCS1_KAN358-2_8.tif:0001-0116	0.933	2.663	0	18	90.328	11.856	0.946	2.484	237	1.131	0.884	0.922	0.0198482
457	NCS1_KAN358-2_8.tif:0002-0119	1.006	41.625	0	225	51.541	12.18	0.954	41.886	3996	1.178	0.849	0.95	0.334656
458	NCS1_KAN358-2_8.tif:0003-0176	1.111	16.038	0	72	124.543	18.02	0.932	17.819	1700	1.283	0.78	0.93	0.142371
459	NCS1_KAN358-2_8.tif:0004-0423	1.509	91	0	498	100.938	43.31	0.876	137.354	13104	1.387	0.721	0.894	1.09743
460	NCS1_KAN358-2_8.tif:0005-0453	1.3	82.355	0	513	72.181	46.324	0.907	107.041	10212	1.334	0.75	0.908	0.855231
461	NCS1_KAN358-2_8.tif:0006-0480	0.985	3.596	0	22	59.757	49.143	0.966	3.543	338	1.164	0.859	0.945	0.0283067
462	NCS1_KAN358-2_8.tif:0007-0568	1.342	2.914	0	14	27.081	58.148	0.925	3.91	373	1.302	0.768	0.905	0.0312379
463	NCS1_KAN358-2_8.tif:0008-0751	1.122	92.692	0	557	70.215	76.893	0.874	103.959	9918	1.513	0.661	0.915	0.830609
464	NCS1_KAN358-2_8.tif:0009-0775	1.017	218.062	0	742	132.623	79.425	0.892	221.712	21152	1.509	0.663	0.933	1.77143
465	NCS1_KAN358-2_8.tif:0010-0809	1.384	183.727	0	907	116.261	82.935	0.855	254.206	24252	1.509	0.663	0.898	2.03105
466	NCS1_KAN358-2_8.tif:0011-0865	1.017	421.66	0	1907	113.571	88.565	0.997	428.719	40901	1.122	0.891	0.951	3.42536
467	NCS1_KAN358-2_8.tif:0012-0902	1.184	32.239	0	122	5.923	92.367	0.94	38.185	3643	1.334	0.75	0.911	0.305093
468	NCS1_KAN358-2_8.tif:0013-0941	0.964	5.293	0	36	82.682	96.328	0.945	5.105	487	1.372	0.729	0.939	0.0407851
469	NCS1_KAN358-2_8.tif:0014-0948	1.006	105.385	0	549	2.462	97.039	0.883	106.045	10117	1.329	0.752	0.914	0.847275
										9818.16				0.822248
470	NCS1_KAN358-3_1.tif:0001-0058	0.87	43.602	0	237	47.197	5.991	0.895	37.934	3619	1.209	0.827	0.933	0.303083
471	NCS1_KAN358-3_1.tif:0002-0160	0.943	231.489	15	964	14.994	16.374	0.682	218.379	20834	2.38	0.42	0.87	1.7448
472	NCS1_KAN358-3_1.tif:0003-0203	1.006	42.802	0	236	12.401	20.741	0.871	43.07	4109	1.321	0.757	0.889	0.344119
473	NCS1_KAN358-3_1.tif:0004-0225	1.08	20.126	0	94	61.2	23.079	0.952	21.729	2073	1.323	0.756	0.907	0.173609
474	NCS1_KAN358-3_1.tif:0005-0244	1.53	103.226	0	512	140.622	24.989	0.865	157.972	15071	1.41	0.709	0.915	1.26216
475	NCS1_KAN358-3_1.tif:0006-0343	1.247	10.303	0	81	101.063	35.133	0.792	12.851	1226	1.407	0.711	0.865	0.102675
476	NCS1_KAN358-3_1.tif:0007-0493	0.933	26.674	0	202	66.567	50.591	0.873	24.884	2374	1.559	0.642	0.894	0.198817
477	NCS1_KAN358-3_1.tif:0008-0551	1.205	76.313	0	501	39.574	56.495	0.876	91.989	8776	1.293	0.773	0.888	0.734969
478	NCS1_KAN358-3_1.tif:0009-0641	1.132	64.481	0	251	125.728	65.665	0.95	72.996	6964	1.227	0.815	0.931	0.583219
479	NCS1_KAN358-3_1.tif:0010-0668	1.635	88.994	0	611	13.096	68.399	0.798	145.52	13883	1.479	0.676	0.897	1.16267
480	NCS1_KAN358-3_1.tif:0011-0818	1.384	115.909	0	722	89.449	83.825	0.794	160.372	15300	1.297	0.771	0.849	1.28134
481	NCS1_KAN358-3_1.tif:0012-0874	1.132	66.87	0	433	67.935	89.47	0.853	75.7	7222	1.252	0.799	0.947	0.604826
482	NCS1_KAN358-3_1.tif:0013-0877	1.08	38.097	0	280	140.866	89.829	0.878	41.131	3924	1.427	0.701	0.916	0.328626
483	NCS1_KAN358-3_1.tif:0014-0905	1.101	58.286	0	299	113.152	92.665	0.941	64.149	6120	1.244	0.804	0.905	0.512536
484	NCS1_KAN358-3_2.tif:0001-0072	0.996	76.842	0	315	16.03	7.402	0.914	76.518	7300	1.335	0.749	0.95	0.611358
485	NCS1_KAN358-3_2.tif:0002-0128	0.922	80.182	0	555	100.304	13.123	0.982	73.96	7056	1.065	0.939	0.946	0.590923
486	NCS1_KAN358-3_2.tif:0003-0272	1.457	65.201	0	511	60.471	27.918	0.833	94.997	9063	1.556	0.643	0.911	0.759005
487	NCS1_KAN358-3_2.tif:0004-0282	1.017	95.165	0	657	17.494	28.984	0.864	96.758	9231	1.553	0.644	0.956	0.773075
488	NCS1_KAN358-3_2.tif:0005-0285	0.985	76.798	0	406	89.893	29.224	0.837	75.669	7219	1.739	0.575	0.935	0.604574
489	NCS1_KAN358-3_2.tif:0006-0439	1.342	57.016	0	450	58.112	44.996	0.795	76.497	7298	1.379	0.725	0.889	0.61119
490	NCS1_KAN358-3_2.tif:0007-0578	1.394	113.767	0	821	128.134	59.159	0.871	158.601	15131	1.249	0.801	0.908	1.26719
491	NCS1_KAN358-3_2.tif:0008-0711	1.027	34.837	0	123	27.621	72.858	0.889	35.785	3414	1.352	0.74	0.899	0.285915
492	NCS1_KAN358-3_2.tif:0009-0712	1.163	44.216	0	293	71.81	72.958	0.964	51.445	4908	1.199	0.834	0.929	0.411034
493	NCS1_KAN358-3_2.tif:0010-0831	1.646	93.166	0	596	103.916	85.179	0.864	153.318	14627	1.37	0.73	0.929	1.22498
494	NCS1_KAN358-3_2.tif:0011-0981	1.289	10.415	0	88	54.423	100.529	0.756	13.427	1281	1.44	0.695	0.851	0.107281
495	NCS1_KAN358-3_3.tif:0001-0083	0.891	36.294	0	247	16.921	8.586	0.916	32.337	3085	1.196	0.836	0.944	0.258362
496	NCS1_KAN358-3_3.tif:0002-0095	0.975	76.065	0	400	77.966	9.787	0.855	74.149	7074	1.447	0.691	0.912	0.592431
497	NCS1_KAN358-3_3.tif:0003-0174	1.258	120.3	0	714	120.767	17.861	0.853	151.316	14436	1.341	0.746	0.896	1.20898
498	NCS1_KAN358-3_3.tif:0004-0344	1.122	64.85	0	341	1.522	35.259	0.941	72.734	6939	1.254	0.798	0.926	0.581125
499	NCS1_KAN358-3_3.tif:0005-0374	1.53	63.185	0	469	29.152	38.269	0.865	96.695	9225	1.504	0.665	0.91	0.772572
500	NCS1_KAN358-3_3.tif:0006-0425	1.08	62.981	0	400	50.459	43.492	0.918	67.996	6487	1.274	0.785	0.941	0.543271
501	NCS1_KAN358-3_3.tif:0007-0446	1.289	74.789	0	378	84.848	45.647	0.864	96.423	9199	1.317	0.759	0.863	0.770395
502	NCS1_KAN358-3_3.tif:0008-0456	1.614	109.649	0	504	109.096	46.708	0.89	176.997	16886	1.293	0.774	0.928	1.41416
503	NCS1_KAN358-3_3.tif:0009-0614	1.258	399.9	0	3345	120.094	62.965	0.701	503.003	47988	1.867	0.535	0.848	4.01888
504	NCS1_KAN358-3_3.tif:0010-0697	1.562	103.503	0	613	129.035	71.399	0.897	161.651	15422	1.123	0.89	0.895	1.29156
505	NCS1_KAN358-3_3.tif:0011-0748	1.195	91.719	0	386	93.773	76.604	0.904	109.598	10456	1.293	0.773	0.931	0.875666
506	NCS1_KAN358-3_3.tif:0012-0838	1.279	53.59	0	277	23.8	85.843	0.892	68.53	6538	1.312	0.762	0.897	0.547542
507	NCS1_KAN358-3_3.tif:0013-0847	1.153	57.518	0	333	60.543	86.784	0.938	66.319	6327	1.326	0.754	0.944	0.529871
508	NCS1_KAN358-3_3.tif:0014-0999	1.017	62.433	0	348	76.076	102.293	0.97	63.478	6056	1.102	0.907	0.915	0.507176
509	NCS1_KAN358-3_4.tif:0001-0064	1.247	76.908	0	646	27.137	6.554	0.78	95.93	9152	1.768	0.566	0.878	0.766459
510	NCS1_KAN358-3_4.tif:0002-0094	1.017	15.216	0	119	132.541	9.668	0.983	15.471	1476	1.026	0.975	0.933	0.123612
511	NCS1_KAN358-3_4.tif:0003-0199	1.216	64.517	0	465	13.129	20.36	0.781	78.446	7484	1.648	0.607	0.862	0.626767
512	NCS1_KAN358-3_4.tif:0004-0290	0.891	46.859	0	310	55.487	29.679	0.949	41.749	3983	1.062	0.941	0.934	0.333567
513	NCS1_KAN358-3_4.tif:0005-0395	0.954	60.253	0	336	61.822	40.503	0.892	57.472	5483	1.052	0.951	0.888	0.459188
514	NCS1_KAN358-3_4.tif:0006-0402	1.677	77.569	0	655	115.015	41.125	0.814	130.09	12411	1.66	0.603	0.884	1.03939
515	NCS1_KAN358-3_4.tif:0007-0449	0.933	14.944	0	128	31.403	45.973	0.993	13.941	1330	1.027	0.974	0.952	0.111384
516	NCS1_KAN358-3_4.tif:0008-0561	1.415	71	0	730	115.278	57.498	0.875	100.469	9585	1.22	0.82	0.897	0.802721
517	NCS1_KAN358-3_4.tif:0009-0603	1.289	50.455	0	399	33.47	61.735	0.91	65.05	6206	1.146	0.873	0.908	0.519738
518	NCS1_KAN358-3_4.tif:0010-0629	0.964	99.565	0	457	75.39	64.43	0.964	96.014	9160	1.058	0.945	0.911	0.767129
519	NCS1_KAN358-3_4.tif:0011-0753	1.069	82.304	0	474	20.144	77.093	0.955	87.995	8395	1.116	0.896	0.903	0.703062
520	NCS1_KAN358-3_4.tif:0012-0812	0.985	40.798	0	156	130.624	83.151	0.934	40.198	3835	1.165	0.858	0.94	0.321172
521	NCS1_KAN358-3_4.tif:0013-0840	1.069	55.755	0	360	56.626	85.993	0.809	59.61	5687	1.451	0.689	0.887	0.476273
522	NCS1_KAN358-3_4.tif:0014-0940	1.101	45.429	0	222	134.926	96.303	0.924	49.998	4770	1.337	0.748	0.917	0.399476
523	NCS1_KAN358-3_4.tif:0015-1031	0.839	18.3	0	84	106.749	105.607	0.959	15.345	1464	1.46	0.685	0.941	0.122607
524	NCS1_KAN358-3_5.tif:0001-0056	1.069	20.676	0	117	56.342	5.703	0.955	22.106	2109	1.157	0.864	0.915	0.176624
525	NCS1_KAN358-3_5.tif:0002-0060	1.216	79.422	0	578	124.166	6.176	0.92	96.569	9213	1.166	0.857	0.928	0.771567
526	NCS1_KAN358-3_5.tif:0003-0097	1.436	38.708	0	197	75.866	9.988	0.912	55.585	5303	1.421	0.703	0.926	0.444114
527	NCS1_KAN358-3_5.tif:0004-0291	1.153	42.291	0	300	12.964	29.784	0.899	48.762	4652	1.469	0.681	0.928	0.389594
528	NCS1_KAN358-3_5.tif:0005-0524	1.384	107.371	0	687	132.361	53.654	0.855	148.559	14173	1.244	0.804	0.895	1.18696
529	NCS1_KAN358-3_5.tif:0006-0528	1.122	56.738	0	440	26.925	54.033	0.874	63.635	6071	1.44	0.694	0.915	0.508432
530	NCS1_KAN358-3_5.tif:0007-0550	1.31	53.52	0	444	57.244	56.293	0.94	70.124	6690	1.206	0.829	0.909	0.560272
531	NCS1_KAN358-3_5.tif:0008-0552	1.163	81.432	0	455	85.691	56.505	0.881	94.746	9039	1.377	0.726	0.906	0.756995
532	NCS1_KAN358-3_5.tif:0009-0651	1.184	145.965	0	1054	103.965	66.714	0.952	172.888	16494	1.229	0.814	0.922	1.38133
533	NCS1_KAN358-3_5.tif:0010-0713	0.943	64.244	0	321	141.177	73.016	0.97	60.606	5782	1.106	0.904	0.957	0.484229
534	NCS1_KAN358-3_5.tif:0011-0816	1.992	57.805	0	611	118.909	83.567	0.717	115.122	10983	2.255	0.443	0.878	0.919801
535	NCS1_KAN358-3_5.tif:0012-0890	1.3	101.226	0	577	10.316	91.13	0.867	131.568	12552	1.66	0.602	0.943	1.0512
536	NCS1_KAN358-3_5.tif:0013-0893	1.143	54.459	0	393	49.914	91.525	0.84	62.22	5936	1.495	0.669	0.908	0.497126
537	NCS1_KAN358-3_5.tif:0014-0914	1.331	5.685	0	50	104.672	93.587	0.781	7.568	722	1.809	0.553	0.891	0.0604658
538	NCS1_KAN358-3_6.tif:0001-0027	1.405	55.187	0	365	136.66	2.801	0.775	77.513	7395	1.699	0.589	0.859	0.619314
539	NCS1_KAN358-3_6.tif:0002-0154	1.017	62.381	0	280	18.8	15.747	0.933	63.426	6051	1.155	0.865	0.951	0.506757
540	NCS1_KAN358-3_6.tif:0003-0217	1.363	45.246	0	384	47.843	22.194	0.799	61.654	5882	1.648	0.607	0.887	0.492604
541	NCS1_KAN358-3_6.tif:0004-0232	1.3	79.331	0	577	93.318	23.789	0.858	103.11	9837	1.252	0.799	0.902	0.823826
542	NCS1_KAN358-3_6.tif:0005-0412	1.342	91.391	0	570	133.246	42.31	0.861	122.617	11698	1.159	0.862	0.911	0.97968
543	NCS1_KAN358-3_6.tif:0006-0495	1.006	49.51	0	291	60.528	50.655	0.899	49.82	4753	1.371	0.729	0.897	0.398053
544	NCS1_KAN358-3_6.tif:0007-0630	0.88	31.619	0	272	94.674	64.522	0.971	27.84	2656	1.138	0.879	0.939	0.222434
545	NCS1_KAN358-3_6.tif:0008-0692	1.048	41.83	0	331	28.508	70.895	0.868	43.846	4183	1.369	0.731	0.893	0.350316
546	NCS1_KAN358-3_6.tif:0009-0707	1.478	117.404	0	732	133.756	72.364	0.867	173.517	16554	1.546	0.647	0.94	1.38636
547	NCS1_KAN358-3_6.tif:0010-0886	1.467	115.036	0	865	89.466	90.667	0.755	168.81	16105	2.025	0.494	0.892	1.34876
										8673.23				0.726363
														0
														0
														0
548	NCS1_KAN358-4_1.tif:0001-0033	1.331	135.669	0	756	129.828	3.454	0.888	180.602	17230	1.403	0.713	0.937	1.44297
549	NCS1_KAN358-4_1.tif:0002-0097	1.048	45.62	0	347	71.012	9.977	0.949	47.818	4562	1.048	0.954	0.93	0.382057
550	NCS1_KAN358-4_1.tif:0003-0126	0.943	186.911	0	821	89.822	12.949	0.925	176.326	16822	1.334	0.75	0.933	1.4088
551	NCS1_KAN358-4_1.tif:0004-0161	1.205	50.13	0	233	0.878	16.51	0.876	60.428	5765	1.317	0.759	0.906	0.482805
552	NCS1_KAN358-4_1.tif:0005-0258	1.373	116.809	0	783	128.752	26.347	0.896	160.393	15302	1.45	0.69	0.907	1.28151
553	NCS1_KAN358-4_1.tif:0006-0385	0.996	24.705	0	122	37.34	39.437	0.919	24.601	2347	1.459	0.685	0.905	0.196556
554	NCS1_KAN358-4_1.tif:0007-0432	1.583	78.55	0	598	124.379	44.24	0.795	124.325	11861	1.342	0.745	0.875	0.993331
555	NCS1_KAN358-4_1.tif:0008-0532	0.943	179.6	0	821	66.04	54.488	0.925	169.429	16164	1.102	0.907	0.928	1.3537
556	NCS1_KAN358-4_1.tif:0009-0543	1.279	53.148	0	359	87.419	55.635	0.882	67.964	6484	1.36	0.736	0.891	0.54302
557	NCS1_KAN358-4_1.tif:0010-0680	1.499	152.084	0	943	82.135	69.621	0.879	227.959	21748	1.166	0.858	0.914	1.82134
558	NCS1_KAN358-4_1.tif:0011-0768	1.53	115.705	0	850	115.841	78.638	0.897	177.07	16893	1.115	0.897	0.915	1.41475
559	NCS1_KAN358-4_1.tif:0012-0890	1.174	34.92	0	260	61.619	91.165	0.915	40.995	3911	1.071	0.933	0.918	0.327537
560	NCS1_KAN358-4_1.tif:0013-0908	1.111	52.16	0	284	11.923	93.026	0.975	57.954	5529	1.136	0.88	0.955	0.463041
561	NCS1_KAN358-4_2.tif:0001-0039	1.006	138.865	0	569	43.843	3.965	0.855	139.734	13331	1.525	0.656	0.923	1.11644
562	NCS1_KAN358-4_2.tif:0002-0052	1.174	30.045	0	191	88.753	5.268	0.932	35.271	3365	1.084	0.922	0.9	0.281811
563	NCS1_KAN358-4_2.tif:0003-0151	1.488	83.099	0	471	61.357	15.467	0.752	123.686	11800	2.127	0.47	0.947	0.988222
564	NCS1_KAN358-4_2.tif:0004-0200	1.226	75.009	0	314	12.02	20.496	0.901	91.989	8776	1.17	0.854	0.925	0.734969
565	NCS1_KAN358-4_2.tif:0005-0313	1.31	140.896	0	677	114.167	32.08	0.864	184.607	17612	1.437	0.696	0.903	1.47496
566	NCS1_KAN358-4_2.tif:0006-0474	1.258	116.625	0	663	71.426	48.492	0.817	146.694	13995	1.522	0.657	0.902	1.17205
567	NCS1_KAN358-4_2.tif:0007-0482	1.342	146.398	0	928	100.139	49.393	0.895	196.42	18739	1.23	0.813	0.924	1.56935
568	NCS1_KAN358-4_2.tif:0008-0531	1.918	128.552	0	1006	115.874	54.381	0.849	246.586	23525	1.189	0.841	0.906	1.97016
569	NCS1_KAN358-4_2.tif:0009-0558	1.247	23.16	0	129	18.74	57.206	0.961	28.888	2756	1.114	0.898	0.919	0.230809
570	NCS1_KAN358-4_2.tif:0010-0665	1.289	78.244	0	554	84.839	68.11	0.885	100.877	9624	1.552	0.644	0.925	0.805987
571	NCS1_KAN358-4_2.tif:0011-0713	1.593	135.046	0	856	137.226	72.944	0.848	215.161	20527	1.415	0.707	0.889	1.71909
572	NCS1_KAN358-4_2.tif:0012-0786	1.897	163.906	0	1240	113.438	80.407	0.803	310.965	29667	1.773	0.564	0.907	2.48454
573	NCS1_KAN358-4_2.tif:0013-0790	1.31	129.736	0	850	28.429	80.935	0.797	169.984	16217	1.379	0.725	0.88	1.35814
574	NCS1_KAN358-4_2.tif:0014-0889	1.551	163.074	0	1133	126.021	91.083	0.834	252.98	24135	1.218	0.821	0.9	2.02125
575	NCS1_KAN358-4_2.tif:0015-0892	1.31	49.728	0	308	33.561	91.259	0.777	65.155	6216	1.768	0.566	0.916	0.520575
576	NCS1_KAN358-4_2.tif:0016-0909	1.258	91.925	0	464	87.17	93.028	0.863	115.625	11031	1.425	0.702	0.913	0.92382
577	NCS1_KAN358-4_2.tif:0017-1021	0.996	100.632	0	332	43.116	104.544	0.957	100.207	9560	1.018	0.983	0.979	0.800628
578	NCS1_KAN358-4_3.tif:0001-0082	1.195	181.07	0	841	98.991	8.417	0.916	216.367	20642	1.274	0.785	0.95	1.72872
579	NCS1_KAN358-4_3.tif:0002-0295	0.975	64.581	0	354	59.053	30.178	0.924	62.954	6006	1.199	0.834	0.939	0.502988
580	NCS1_KAN358-4_3.tif:0003-0343	1.08	2.835	0	15	10.529	35.204	0.906	3.061	292	1.399	0.715	0.916	0.0244543
581	NCS1_KAN358-4_3.tif:0004-0344	1.184	149.69	0	852	107.698	35.258	0.908	177.301	16915	1.348	0.742	0.95	1.41659
582	NCS1_KAN358-4_3.tif:0005-0458	1.205	206.33	0	1121	135.732	46.919	0.876	248.714	23728	1.577	0.634	0.909	1.98716
583	NCS1_KAN358-4_3.tif:0006-0479	1.006	47.792	0	277	75.792	49.108	0.911	48.091	4588	1.439	0.695	0.932	0.384234
584	NCS1_KAN358-4_3.tif:0007-0538	1.027	210.602	0	671	29.534	55.08	0.943	216.335	20639	1.094	0.914	0.951	1.72847
585	NCS1_KAN358-4_3.tif:0008-0775	1.163	160.396	0	756	75.63	79.324	0.935	186.619	17804	1.133	0.882	0.921	1.49104
586	NCS1_KAN358-4_3.tif:0009-0854	1.834	183.006	0	1153	117.294	87.432	0.744	335.692	32026	1.964	0.509	0.909	2.6821
587	NCS1_KAN358-4_3.tif:0010-0962	1.153	125.573	0	611	139.36	98.547	0.998	144.786	13813	1.086	0.921	0.94	1.15681
588	NCS1_KAN358-4_4.tif:0001-0028	0.964	100.185	0	416	14.802	2.852	0.978	96.611	9217	1.222	0.818	0.934	0.771902
589	NCS1_KAN358-4_4.tif:0002-0168	1.059	83.901	0	373	56.66	17.211	0.946	88.823	8474	1.242	0.805	0.922	0.709678
590	NCS1_KAN358-4_4.tif:0003-0210	0.975	138.086	0	702	85.016	21.557	0.907	134.608	12842	1.266	0.79	0.974	1.07549
591	NCS1_KAN358-4_4.tif:0004-0248	0.86	127.854	0	494	28.767	25.432	0.962	109.892	10484	1.209	0.827	0.965	0.87801
592	NCS1_KAN358-4_4.tif:0005-0358	1.195	105.509	0	722	72.706	36.665	0.853	126.076	12028	1.351	0.74	0.908	1.00732
593	NCS1_KAN358-4_4.tif:0006-0362	1.08	132.971	0	660	127.835	37.149	0.918	143.56	13696	1.079	0.927	0.945	1.14701
594	NCS1_KAN358-4_4.tif:0007-0482	1.111	43.151	0	174	24.497	49.323	0.877	47.944	4574	1.353	0.739	0.93	0.383062
595	NCS1_KAN358-4_4.tif:0008-0495	1.352	72.333	0	341	107.223	50.719	0.917	97.806	9331	1.297	0.771	0.931	0.781449
596	NCS1_KAN358-4_4.tif:0009-0695	1.059	30.554	0	149	42.455	71.145	0.9	32.347	3086	1.399	0.715	0.935	0.258445
597	NCS1_KAN358-4_4.tif:0010-0752	1.405	111.187	0	453	118.883	76.927	0.892	156.169	14899	1.406	0.711	0.908	1.24776
598	NCS1_KAN358-4_4.tif:0011-0786	0.996	82.358	0	482	76.146	80.541	0.944	82.01	7824	1.145	0.873	0.941	0.655242
599	NCS1_KAN358-4_4.tif:0012-0958	1.09	158.452	0	717	114.088	98.097	0.861	172.731	16479	1.151	0.869	0.9	1.38008
600	NCS1_KAN358-4_5.tif:0001-0098	0.975	31	0	125	69.547	10.012	0.988	30.219	2883	1.067	0.937	0.939	0.241445
601	NCS1_KAN358-4_5.tif:0002-0103	0.964	69.359	0	279	7.141	10.552	0.945	66.885	6381	1.136	0.88	0.934	0.534394
602	NCS1_KAN358-4_5.tif:0003-0105	1.321	70.349	0	523	54.864	10.764	0.862	92.911	8864	1.408	0.71	0.884	0.742339
603	NCS1_KAN358-4_5.tif:0004-0144	1.09	7.365	0	47	126.901	14.731	0.974	8.029	766	1.185	0.844	0.92	0.0641507
604	NCS1_KAN358-4_5.tif:0005-0252	1.258	61.025	0	397	112.137	25.771	0.863	76.759	7323	1.494	0.669	0.909	0.613284
605	NCS1_KAN358-4_5.tif:0006-0262	1.237	55	0	291	23.81	26.845	0.898	68.027	6490	1.301	0.768	0.904	0.543522
606	NCS1_KAN358-4_5.tif:0007-0358	1.279	33.008	0	208	78.889	36.672	0.892	42.21	4027	1.044	0.958	0.881	0.337252
607	NCS1_KAN358-4_5.tif:0008-0492	1.331	105.748	0	590	103.709	50.408	0.864	140.771	13430	1.373	0.728	0.934	1.12473
608	NCS1_KAN358-4_5.tif:0009-0497	1.006	71.323	0	325	36.545	50.971	0.954	71.769	6847	1.066	0.938	0.941	0.57342
609	NCS1_KAN358-4_5.tif:0010-0558	1.31	63.08	0	256	77.945	57.181	0.864	82.649	7885	1.485	0.674	0.903	0.66035
610	NCS1_KAN358-4_5.tif:0011-0638	0.86	21.89	0	81	47.571	65.323	0.983	18.815	1795	1.053	0.95	0.937	0.150327
611	NCS1_KAN358-4_5.tif:0012-0735	1.457	194.59	0	1122	96.868	75.197	0.854	283.513	27048	1.316	0.76	0.888	2.26521
612	NCS1_KAN358-4_5.tif:0013-0745	1.143	114.394	0	645	68.914	76.256	0.918	130.698	12469	1.206	0.829	0.897	1.04425
613	NCS1_KAN358-4_5.tif:0014-0856	1.017	125.072	0	605	29.628	87.629	0.875	127.166	12132	1.45	0.69	0.951	1.01603
614	NCS1_KAN358-4_5.tif:0015-0934	1.31	165.616	0	958	82.589	95.658	0.828	216.995	20702	1.592	0.628	0.936	1.73374
615	NCS1_KAN358-4_6.tif:0001-0012	1.059	40.772	0	202	21.244	1.271	0.9	43.164	4118	1.141	0.876	0.922	0.344873
616	NCS1_KAN358-4_6.tif:0002-0042	0.985	55.372	0	275	74.386	4.368	0.887	54.558	5205	1.215	0.823	0.974	0.435907
617	NCS1_KAN358-4_6.tif:0003-0303	1.111	133.34	0	524	38.164	31.047	0.916	148.151	14134	1.411	0.708	0.968	1.18369
618	NCS1_KAN358-4_6.tif:0004-0375	1.027	71.673	0	379	90.375	38.414	0.98	73.625	7024	1.201	0.833	0.92	0.588244
619	NCS1_KAN358-4_6.tif:0005-0391	1.205	200.948	0	1102	139.273	40.05	0.912	242.225	23109	1.381	0.724	0.924	1.93532
620	NCS1_KAN358-4_6.tif:0006-0471	1.258	86.267	0	621	59.666	48.235	0.817	108.508	10352	1.703	0.587	0.896	0.866956
621	NCS1_KAN358-4_6.tif:0007-0518	0.943	69.922	0	328	18.814	53.033	0.957	65.962	6293	1.155	0.866	0.923	0.527024
622	NCS1_KAN358-4_6.tif:0008-0641	1.446	211.109	0	1410	109.529	65.782	0.848	305.368	29133	1.303	0.767	0.917	2.43982
623	NCS1_KAN358-4_6.tif:0009-0713	1.111	50.038	0	248	91.492	73.04	0.904	55.596	5304	1.395	0.717	0.938	0.444198
624	NCS1_KAN358-4_6.tif:0010-0860	1.132	36.676	0	202	40.379	88.113	0.857	41.519	3961	1.642	0.609	0.915	0.331724
625	NCS1_KAN358-4_6.tif:0011-0901	1.08	28.854	0	151	4.259	92.274	0.947	31.152	2972	1.119	0.893	0.941	0.248898
626	NCS1_KAN358-4_6.tif:0012-0930	1.184	165.283	0	909	104.851	95.279	0.964	195.77	18677	1.192	0.839	0.942	1.56416
627	NCS1_KAN358-4_6.tif:0013-0943	1.216	205.129	0	1198	62.435	96.591	0.894	249.416	23795	1.386	0.722	0.932	1.99278
										10665.5				0.893208
628	NCS1_KAN358-5_1.tif:0001-0026	1.195	20.088	0	78	59.955	2.66	0.868	24.003	2290	1.595	0.627	0.912	0.191782
629	NCS1_KAN358-5_1.tif:0002-0063	0.964	51.217	0	332	13.107	6.478	0.978	49.391	4712	1.114	0.898	0.944	0.394619
630	NCS1_KAN358-5_1.tif:0003-0143	1.069	51.667	0	215	135.752	14.607	0.914	55.239	5270	1.161	0.861	0.883	0.44135
631	NCS1_KAN358-5_1.tif:0004-0242	1.101	68.181	0	420	88.806	24.74	0.953	75.04	7159	1.117	0.895	0.921	0.599549
632	NCS1_KAN358-5_1.tif:0005-0354	1.174	30.036	0	255	113.384	36.262	0.783	35.261	3364	1.873	0.534	0.889	0.281727
633	NCS1_KAN358-5_1.tif:0006-0377	1.027	11.786	0	90	55.429	38.574	0.948	12.107	1155	1.148	0.871	0.903	0.0967285
634	NCS1_KAN358-5_1.tif:0007-0399	1.038	29.242	0	116	26.517	40.86	0.91	30.345	2895	1.34	0.746	0.934	0.242449
635	NCS1_KAN358-5_1.tif:0008-0513	0.86	27.402	0	115	103.859	52.558	0.915	23.553	2247	1.251	0.8	0.921	0.188181
636	NCS1_KAN358-5_1.tif:0009-0631	0.933	15.64	0	79	71.208	64.572	0.946	14.591	1392	1.212	0.825	0.922	0.116577
637	NCS1_KAN358-5_1.tif:0010-0679	0.891	43.812	0	266	49.636	69.569	0.916	39.034	3724	1.441	0.694	0.955	0.311876
638	NCS1_KAN358-5_1.tif:0011-0759	1.09	18.26	0	63	13.492	77.782	0.956	19.905	1899	1.069	0.935	0.945	0.159037
639	NCS1_KAN358-5_1.tif:0012-0817	1.09	91.548	0	562	115.604	83.668	0.915	99.798	9521	1.181	0.847	0.916	0.797361
640	NCS1_KAN358-5_1.tif:0013-0824	0.901	85.895	0	227	139.565	84.358	0.927	77.429	7387	1.081	0.925	0.935	0.618644
641	NCS1_KAN358-5_1.tif:0014-0878	1.31	49.088	0	357	116.287	89.924	0.851	64.317	6136	1.246	0.803	0.912	0.513876
642	NCS1_KAN358-5_1.tif:0015-0928	1.321	115.968	0	920	131.76	95.016	0.959	153.161	14612	1.284	0.779	0.947	1.22372
643	NCS1_KAN358-5_2.tif:0001-0029	0.87	288	4	1674	121.603	3.025	0.974	250.558	23904	1.108	0.903	0.971	2.0019
644	NCS1_KAN358-5_2.tif:0002-0036	0.901	46.186	0	238	131.026	3.671	0.927	41.634	3972	1.169	0.856	0.935	0.332646
645	NCS1_KAN358-5_2.tif:0003-0185	0.964	7.859	0	109	40.852	18.886	0.846	7.578	723	1.32	0.758	0.898	0.0605496
646	NCS1_KAN358-5_2.tif:0004-0297	1.153	5.6	0	39	85.365	30.435	0.862	6.457	616	1.561	0.641	0.905	0.0515886
647	NCS1_KAN358-5_2.tif:0005-0398	1.059	17.604	0	100	133.224	40.686	0.888	18.637	1778	1.362	0.734	0.927	0.148903
648	NCS1_KAN358-5_2.tif:0006-0410	0.86	10.707	0	57	17.257	42.045	0.948	9.203	878	1.333	0.75	0.943	0.0735304
649	NCS1_KAN358-5_2.tif:0007-0462	0.933	262.337	0	1526	128.604	47.364	0.694	244.73	23348	2.036	0.491	0.844	1.95534
650	NCS1_KAN358-5_2.tif:0008-0470	1.153	7.927	0	46	62.379	48.227	0.926	9.14	872	1.291	0.775	0.924	0.073028
651	NCS1_KAN358-5_2.tif:0009-0520	1.017	21.526	0	105	83.984	53.281	1	21.886	2088	1.084	0.923	0.933	0.174865
652	NCS1_KAN358-5_2.tif:0010-0563	1.143	10.734	0	76	112.495	57.687	0.93	12.264	1170	1.099	0.91	0.932	0.0979848
653	NCS1_KAN358-5_2.tif:0011-0668	1.279	62.787	0	402	71.357	68.372	0.844	80.291	7660	1.506	0.664	0.894	0.641507
654	NCS1_KAN358-5_2.tif:0012-0670	1.132	20.231	0	167	4.464	68.627	0.898	22.903	2185	1.105	0.905	0.885	0.182989
655	NCS1_KAN358-5_2.tif:0013-0708	1.331	48.055	0	250	130.288	72.578	0.742	63.971	6103	1.735	0.576	0.882	0.511112
656	NCS1_KAN358-5_2.tif:0014-0821	1.153	29.055	0	185	94.211	84.068	0.938	33.5	3196	1.208	0.828	0.94	0.267658
657	NCS1_KAN358-5_2.tif:0015-0856	1.771	591.278	0	3759	114.763	87.699	0.781	1047.41	99926	2.178	0.459	0.977	8.36857
658	NCS1_KAN358-5_2.tif:0016-0971	1.258	36	0	266	15.425	99.405	0.888	45.282	4320	1.298	0.77	0.902	0.36179
659	NCS1_KAN358-5_2.tif:0017-0997	0.964	153.793	0	483	67.485	102.239	0.697	148.308	14149	1.559	0.641	0.836	1.18495
660	NCS1_KAN358-5_2.tif:0018-1004	0.86	291.476	23	1289	125.062	102.862	0.708	250.527	23901	2.192	0.456	0.845	2.00165
661	NCS1_KAN358-5_2.tif:0019-1022	1.562	64.369	0	350	112.613	104.676	0.773	100.532	9591	1.777	0.563	0.884	0.803224
662	NCS1_KAN358-5_3.tif:0001-0043	1.226	42.632	0	250	101.4	4.442	0.928	52.284	4988	1.188	0.842	0.932	0.417733
663	NCS1_KAN358-5_3.tif:0002-0095	1.174	51.438	0	255	132.513	9.669	0.796	60.386	5761	1.451	0.689	0.858	0.48247
664	NCS1_KAN358-5_3.tif:0003-0095	1.048	17.27	0	106	96.119	9.749	0.932	18.102	1727	1.114	0.898	0.962	0.144632
665	NCS1_KAN358-5_3.tif:0004-0187	1.216	6.198	0	53	55.475	19.151	0.92	7.536	719	1.41	0.709	0.932	0.0602146
666	NCS1_KAN358-5_3.tif:0005-0316	1.3	70.782	0	455	123.002	32.313	0.724	91.999	8777	1.886	0.53	0.861	0.735053
667	NCS1_KAN358-5_3.tif:0006-0332	1.384	67.091	0	454	77.098	33.983	0.833	92.827	8856	1.209	0.827	0.874	0.741669
668	NCS1_KAN358-5_3.tif:0007-0365	1.059	23.188	0	85	57.124	37.386	0.99	24.549	2342	1.214	0.824	0.944	0.196137
669	NCS1_KAN358-5_3.tif:0008-0494	1.132	60.75	0	376	14.954	50.582	0.921	68.771	6561	1.168	0.856	0.935	0.549468
670	NCS1_KAN358-5_3.tif:0009-0618	1.342	28.969	0	129	37.957	63.247	0.829	38.867	3708	1.233	0.811	0.877	0.310536
671	NCS1_KAN358-5_3.tif:0010-0631	0.996	23.484	0	245	61.995	64.656	0.902	23.385	2231	1.151	0.869	0.913	0.186841
672	NCS1_KAN358-5_3.tif:0011-0643	1.446	11.21	0	161	122.384	65.735	0.789	16.215	1547	1.462	0.684	0.86	0.129558
673	NCS1_KAN358-5_3.tif:0012-0862	1.195	14.649	0	74	80.37	88.261	0.868	17.505	1670	1.379	0.725	0.88	0.139859
674	NCS1_KAN358-5_3.tif:0013-0905	1.059	19.861	0	85	28.518	92.707	0.946	21.027	2006	1.07	0.934	0.918	0.167998
675	NCS1_KAN358-5_3.tif:0014-0998	1.405	103.485	0	676	105.699	102.192	0.845	145.352	13867	1.324	0.755	0.905	1.16133
676	NCS1_KAN358-5_4.tif:0001-0063	1.101	17.686	0	99	112.723	6.48	0.924	19.465	1857	1.104	0.906	0.917	0.155519
677	NCS1_KAN358-5_4.tif:0002-0080	1.195	10.272	0	83	78.047	8.206	0.82	12.274	1171	1.523	0.657	0.901	0.0980685
678	NCS1_KAN358-5_4.tif:0003-0122	1.205	53.191	0	310	137.46	12.603	0.665	64.118	6117	2.027	0.493	0.83	0.512284
679	NCS1_KAN358-5_4.tif:0004-0140	1.017	344.454	9	1818	110.736	14.332	0.779	350.22	33412	1.936	0.517	0.882	2.79818
680	NCS1_KAN358-5_4.tif:0005-0199	0.975	19.333	0	113	99.068	20.436	0.975	18.846	1798	1.024	0.977	0.921	0.150578
681	NCS1_KAN358-5_4.tif:0006-0216	1.132	63.676	0	361	35.515	22.133	0.846	72.084	6877	1.671	0.599	0.882	0.575933
682	NCS1_KAN358-5_4.tif:0007-0250	1.122	82.636	0	264	133.588	25.617	0.958	92.681	8842	1.054	0.949	0.911	0.740497
683	NCS1_KAN358-5_4.tif:0008-0347	0.943	12.656	0	143	58.917	35.542	0.957	11.939	1139	1.123	0.891	0.928	0.0953886
684	NCS1_KAN358-5_4.tif:0009-0384	1.205	10.809	0	75	26.102	39.292	0.969	13.029	1243	1.353	0.739	0.935	0.104098
685	NCS1_KAN358-5_4.tif:0010-0441	1.111	5.387	0	49	122.694	45.143	0.949	5.985	571	1.059	0.944	0.898	0.0478199
686	NCS1_KAN358-5_4.tif:0011-0491	0.891	283.906	32	1198	140.06	50.317	0.903	252.948	24132	1.554	0.643	0.929	2.021
687	NCS1_KAN358-5_4.tif:0012-0626	1.205	2.209	0	14	27.358	64.109	0.912	2.662	254	1.447	0.691	0.935	0.0212719
688	NCS1_KAN358-5_4.tif:0013-0729	1.08	65.981	0	437	51.519	74.678	0.89	71.235	6796	1.471	0.68	0.954	0.569149
689	NCS1_KAN358-5_4.tif:0014-0738	1.771	65.876	0	661	115.453	75.43	0.714	116.695	11133	1.145	0.873	0.816	0.932363
690	NCS1_KAN358-5_4.tif:0015-0870	0.985	61.117	0	240	6.701	89.063	0.755	60.218	5745	1.785	0.56	0.874	0.48113
691	NCS1_KAN358-5_4.tif:0016-0895	1.132	39.704	0	156	102.567	91.587	0.921	44.946	4288	1.264	0.791	0.927	0.35911
692	NCS1_KAN358-5_4.tif:0017-0902	1.163	52.315	0	350	83.729	92.391	0.755	60.868	5807	1.513	0.661	0.867	0.486323
693	NCS1_KAN358-5_4.tif:0018-1026	1.384	74.795	0	465	82.907	105.098	0.833	103.487	9873	1.613	0.62	0.889	0.826841
694	NCS1_KAN358-5_5.tif:0001-0217	1.31	40.912	0	277	54.945	22.237	0.768	53.604	5114	1.759	0.568	0.883	0.428286
695	NCS1_KAN358-5_5.tif:0002-0221	1.006	84.688	0	446	99.773	22.627	0.924	85.218	8130	1.071	0.934	0.941	0.680868
696	NCS1_KAN358-5_5.tif:0003-0370	1.541	66.939	0	411	14.041	37.919	0.781	103.141	9840	1.819	0.55	0.883	0.824077
697	NCS1_KAN358-5_5.tif:0004-0383	1.394	28.368	0	204	93.848	39.149	0.935	39.548	3773	1.331	0.751	0.927	0.31598
698	NCS1_KAN358-5_5.tif:0005-0390	1.069	38.588	0	270	131.648	39.973	0.968	41.257	3936	1.099	0.91	0.944	0.329631
699	NCS1_KAN358-5_5.tif:0006-0545	1.195	16.263	0	110	32.21	55.83	0.972	19.433	1854	1.077	0.929	0.946	0.155268
700	NCS1_KAN358-5_5.tif:0007-0660	0.954	44.165	0	253	45.356	67.633	0.852	42.127	4019	1.445	0.692	0.871	0.336582
701	NCS1_KAN358-5_5.tif:0008-0667	1.415	51.533	0	387	9.823	68.404	0.743	72.922	6957	1.732	0.577	0.871	0.582632
702	NCS1_KAN358-5_5.tif:0009-0679	1.258	32.892	0	346	115.578	69.553	0.914	41.372	3947	1.319	0.758	0.93	0.330552
703	NCS1_KAN358-5_5.tif:0010-0759	1.048	79.15	0	417	21.136	77.8	0.793	82.964	7915	1.752	0.571	0.877	0.662863
704	NCS1_KAN358-5_5.tif:0011-0965	1.929	90.864	0	944	112.554	98.751	0.758	175.246	16719	1.893	0.528	0.895	1.40018
705	NCS1_KAN358-5_6.tif:0001-0047	0.839	388.113	0	1714	13.095	4.862	0.973	325.451	31049	1.104	0.906	0.952	2.60028
706	NCS1_KAN358-5_6.tif:0002-0142	1.205	89.948	0	275	12.699	14.577	0.861	108.424	10344	1.366	0.732	0.92	0.866286
707	NCS1_KAN358-5_6.tif:0003-0176	1.027	32.776	0	181	90.579	18.02	0.901	33.668	3212	1.152	0.868	0.916	0.268997
708	NCS1_KAN358-5_6.tif:0004-0247	1.08	226.932	0	845	13.832	25.382	0.664	245.003	23374	1.954	0.512	0.814	1.95752
709	NCS1_KAN358-5_6.tif:0005-0262	1.289	50.106	0	383	74.51	26.83	0.806	64.6	6163	1.378	0.726	0.885	0.516137
710	NCS1_KAN358-5_6.tif:0006-0282	1.184	55.363	0	338	133.913	28.884	0.981	65.575	6256	1.257	0.795	0.922	0.523925
711	NCS1_KAN358-5_6.tif:0007-0331	0.943	179.433	0	468	24.624	33.909	0.674	169.272	16149	1.963	0.509	0.811	1.35244
712	NCS1_KAN358-5_6.tif:0008-0334	1.3	23.508	0	345	40.203	34.236	0.782	30.555	2915	1.647	0.607	0.879	0.244124
713	NCS1_KAN358-5_6.tif:0009-0452	1.163	51.081	0	357	123.41	46.408	0.855	59.432	5670	1.359	0.736	0.925	0.474849
714	NCS1_KAN358-5_6.tif:0010-0496	1.195	12.325	0	50	30.271	50.864	0.96	14.727	1405	1.173	0.852	0.934	0.117665
715	NCS1_KAN358-5_6.tif:0011-0497	0.849	203.951	0	780	38.984	50.852	0.805	173.16	16520	1.874	0.534	0.905	1.38351
716	NCS1_KAN358-5_6.tif:0012-0606	0.985	33.819	0	126	24.522	62.074	0.985	33.322	3179	1.18	0.848	0.926	0.266234
717	NCS1_KAN358-5_6.tif:0013-0607	1.027	24.092	0	96	69.858	62.187	0.961	24.748	2361	1.05	0.953	0.933	0.197728
718	NCS1_KAN358-5_6.tif:0014-0711	1.3	56.25	0	439	11.771	72.856	0.944	73.111	6975	1.29	0.775	0.932	0.58414
719	NCS1_KAN358-5_6.tif:0015-0850	1.017	21.691	0	98	79.68	87.074	0.921	22.054	2104	1.344	0.744	0.919	0.176205
720	NCS1_KAN358-5_6.tif:0016-0884	1.52	46.821	0	463	113.554	90.449	0.829	71.161	6789	1.166	0.858	0.895	0.568563
721	NCS1_KAN358-5_6.tif:0017-0980	1.048	8.45	0	49	69.142	100.336	0.853	8.857	845	1.272	0.786	0.897	0.0707668
722	NCS1_KAN358-5_6.tif:0018-1016	1.017	28.794	0	133	17.406	104.045	0.983	29.276	2793	1.36	0.735	0.937	0.233907
										8309.56				0.695906
														0
														0
														0
723	NCS1_KAN358-6_1.tif:0001-0026	0.933	232.809	0	878	118.485	2.687	0.845	217.184	20720	1.766	0.566	0.918	1.73525
724	NCS1_KAN358-6_1.tif:0002-0038	0.922	42.068	0	392	65.43	3.939	0.968	38.804	3702	1.086	0.921	0.926	0.310034
725	NCS1_KAN358-6_1.tif:0003-0070	0.954	38.066	0	144	105.061	7.239	0.905	36.309	3464	1.25	0.8	0.929	0.290102
726	NCS1_KAN358-6_1.tif:0004-0263	1.048	17.93	0	71	74.965	26.958	0.937	18.794	1793	1.382	0.724	0.926	0.15016
727	NCS1_KAN358-6_1.tif:0005-0288	0.975	17.753	0	59	63.13	29.52	0.988	17.306	1651	1.18	0.848	0.939	0.138267
728	NCS1_KAN358-6_1.tif:0006-0324	1.132	91.657	0	527	113.108	33.178	0.98	103.76	9899	1.131	0.884	0.943	0.829018
729	NCS1_KAN358-6_1.tif:0007-0399	1.3	29.903	0	86	23.242	40.841	0.682	38.867	3708	2.302	0.434	0.855	0.310536
730	NCS1_KAN358-6_1.tif:0008-0456	1.195	18.342	0	85	93.928	46.682	0.948	21.918	2091	1.231	0.812	0.912	0.175116
731	NCS1_KAN358-6_1.tif:0009-0457	1.426	96.853	0	475	129.411	46.804	0.858	138.067	13172	1.305	0.766	0.895	1.10312
732	NCS1_KAN358-6_1.tif:0010-0488	1.331	83.583	0	407	113.119	49.98	0.899	111.265	10615	1.191	0.84	0.951	0.888981
733	NCS1_KAN358-6_1.tif:0011-0532	1.153	51.318	0	236	47.013	54.523	0.955	59.17	5645	1.225	0.816	0.917	0.472756
734	NCS1_KAN358-6_1.tif:0012-0558	0.996	274.316	0	1347	121.042	57.146	0.786	273.157	26060	1.865	0.536	0.88	2.18246
735	NCS1_KAN358-6_1.tif:0013-0725	1.111	90.953	0	696	117.342	74.281	0.993	101.056	9641	1.099	0.91	0.93	0.807411
736	NCS1_KAN358-6_1.tif:0014-0795	1.153	51.755	0	312	12.958	81.471	0.899	59.673	5693	1.287	0.777	0.905	0.476775
737	NCS1_KAN358-6_1.tif:0015-0812	1.048	177.3	0	618	101.215	83.073	0.652	185.843	17730	2.051	0.488	0.855	1.48485
738	NCS1_KAN358-6_1.tif:0016-0868	1.006	351.948	0	2539	131.719	88.905	0.781	354.151	33787	1.954	0.512	0.923	2.82958
739	NCS1_KAN358-6_1.tif:0017-0924	1.122	12.972	0	75	84.44	94.61	0.958	14.549	1388	1.068	0.937	0.915	0.116242
740	NCS1_KAN358-6_1.tif:0018-0945	1.038	38.444	0	209	82.421	96.772	0.971	39.894	3806	1.201	0.833	0.93	0.318744
741	NCS1_KAN358-6_1.tif:0019-0996	1.132	59.352	0	416	56.566	101.975	0.857	67.189	6410	1.162	0.861	0.9	0.536822
742	NCS1_KAN358-6_1.tif:0020-1009	1.897	100.812	0	958	118.461	103.243	0.755	191.262	18247	1.38	0.725	0.846	1.52814
743	NCS1_KAN358-6_2.tif:0001-0008	0.849	61.938	0	329	114.439	0.753	0.709	52.587	5017	1.735	0.576	0.857	0.420162
744	NCS1_KAN358-6_2.tif:0002-0082	0.901	20.012	0	103	95.643	8.394	0.896	18.039	1721	1.176	0.85	0.93	0.14413
745	NCS1_KAN358-6_2.tif:0003-0426	1.08	24.262	0	144	14.363	43.657	0.906	26.194	2499	1.092	0.916	0.912	0.209285
746	NCS1_KAN358-6_2.tif:0004-0476	1.006	32.75	0	127	89.364	48.715	0.883	32.955	3144	1.382	0.723	0.91	0.263303
747	NCS1_KAN358-6_2.tif:0005-0484	1.279	62.344	0	230	42.997	49.552	0.929	79.725	7606	1.291	0.775	0.924	0.636985
748	NCS1_KAN358-6_2.tif:0006-0553	1.268	76.438	0	350	93.872	56.625	0.921	96.947	9249	1.118	0.895	0.903	0.774582
749	NCS1_KAN358-6_2.tif:0007-0610	1.132	210.972	14	724	63.054	62.415	0.764	238.829	22785	1.871	0.534	0.915	1.90819
750	NCS1_KAN358-6_2.tif:0008-0621	1.876	83.447	0	734	113.559	63.594	0.747	156.568	14937	1.965	0.509	0.895	1.25094
751	NCS1_KAN358-6_2.tif:0009-0679	1.446	74.138	0	514	7.67	69.5	0.871	107.24	10231	1.33	0.752	0.899	0.856822
752	NCS1_KAN358-6_2.tif:0010-0837	1.163	21.865	0	91	85.988	85.737	0.918	25.439	2427	1.605	0.623	0.957	0.203256
753	NCS1_KAN358-6_2.tif:0011-0860	1.132	327.185	0	1820	117.894	88.089	0.832	370.387	35336	1.652	0.605	0.908	2.95931
754	NCS1_KAN358-6_2.tif:0012-0861	1.132	31.62	0	130	136.087	88.228	0.938	35.796	3415	1.319	0.758	0.915	0.285998
755	NCS1_KAN358-6_2.tif:0013-0871	0.996	47.526	0	212	46.364	89.2	0.944	47.326	4515	1.144	0.874	0.945	0.378121
756	NCS1_KAN358-6_2.tif:0014-0976	1.321	87.952	0	397	103.216	99.91	0.848	116.16	11082	1.327	0.754	0.89	0.928092
757	NCS1_KAN358-6_3.tif:0001-0060	0.922	23.625	0	267	5.188	6.207	0.935	21.792	2079	1.342	0.745	0.921	0.174111
758	NCS1_KAN358-6_3.tif:0002-0068	1.09	22.76	0	87	59.52	7.038	0.961	24.811	2367	1.258	0.795	0.924	0.198231
759	NCS1_KAN358-6_3.tif:0003-0082	1.069	49.471	0	149	121.927	8.442	0.987	52.891	5046	1.305	0.766	0.927	0.422591
760	NCS1_KAN358-6_3.tif:0004-0322	0.912	314.966	8	1500	133.271	32.94	0.729	287.224	27402	2.226	0.449	0.888	2.29485
761	NCS1_KAN358-6_3.tif:0005-0338	0.996	9.295	0	61	49.508	34.597	0.902	9.255	883	1.309	0.764	0.922	0.0739492
762	NCS1_KAN358-6_3.tif:0006-0357	1.258	60.975	0	488	115.644	36.617	0.808	76.696	7317	1.772	0.564	0.916	0.612782
763	NCS1_KAN358-6_3.tif:0007-0429	1.132	9.824	0	70	83.522	44.009	0.857	11.121	1061	1.325	0.755	0.9	0.0888563
764	NCS1_KAN358-6_3.tif:0008-0528	1.226	69.47	0	398	13.096	54.091	0.851	85.197	8128	1.571	0.637	0.936	0.680701
765	NCS1_KAN358-6_3.tif:0009-0579	1.258	39.033	0	301	101.419	59.335	0.749	49.097	4684	1.483	0.674	0.848	0.392274
766	NCS1_KAN358-6_3.tif:0010-0618	1.153	50.4	0	372	46.334	63.351	0.91	58.111	5544	1.252	0.799	0.936	0.464297
767	NCS1_KAN358-6_3.tif:0011-0655	1.143	50.349	0	189	127.896	67.165	0.959	57.524	5488	1.131	0.884	0.944	0.459607
768	NCS1_KAN358-6_3.tif:0012-0772	1.205	57.104	0	387	79.909	79.055	0.886	68.834	6567	1.178	0.849	0.913	0.549971
769	NCS1_KAN358-6_3.tif:0013-0866	0.954	81.89	0	326	132.021	88.729	0.864	78.111	7452	1.501	0.666	0.901	0.624088
770	NCS1_KAN358-6_3.tif:0014-0880	0.86	17.024	0	78	29.979	90.138	0.968	14.633	1396	1.127	0.888	0.911	0.116912
771	NCS1_KAN358-6_3.tif:0015-0973	1.09	93.663	0	551	89.208	99.621	0.927	102.104	9741	1.253	0.798	0.95	0.815786
772	NCS1_KAN358-6_3.tif:0016-1004	0.996	35.768	0	200	27.414	102.825	0.885	35.617	3398	1.242	0.805	0.936	0.284575
773	NCS1_KAN358-6_4.tif:0001-0165	0.86	11.146	0	64	56.114	16.935	0.902	9.58	914	1.181	0.847	0.882	0.0765454
774	NCS1_KAN358-6_4.tif:0002-0166	0.933	27.348	0	82	32.573	17.01	0.902	25.513	2434	1.316	0.76	0.913	0.203842
775	NCS1_KAN358-6_4.tif:0003-0227	1.017	9.258	0	50	140.319	23.234	0.921	9.413	898	1.172	0.853	0.933	0.0752054
776	NCS1_KAN358-6_4.tif:0004-0232	1.153	84.409	0	370	23.276	23.728	0.848	97.324	9285	1.487	0.673	0.905	0.777597
777	NCS1_KAN358-6_4.tif:0005-0264	1.153	44.855	0	176	102.426	27.07	0.926	51.717	4934	1.248	0.801	0.913	0.413211
778	NCS1_KAN358-6_4.tif:0006-0278	0.901	337.302	12	1538	60.762	28.489	0.927	304.058	29008	1.342	0.745	0.95	2.42935
779	NCS1_KAN358-6_4.tif:0007-0352	0.996	22.411	0	129	80.086	36.087	0.932	22.316	2129	1.275	0.785	0.922	0.178299
780	NCS1_KAN358-6_4.tif:0008-0404	1.111	90.925	0	550	120.13	41.334	0.882	101.024	9638	1.32	0.758	0.869	0.80716
781	NCS1_KAN358-6_4.tif:0009-0540	1.258	78.858	0	287	38.296	55.282	0.817	99.19	9463	1.414	0.707	0.913	0.792504
782	NCS1_KAN358-6_4.tif:0010-0561	1.205	192.835	1	1004	74.893	57.551	0.655	232.446	22176	2.328	0.429	0.824	1.85719
783	NCS1_KAN358-6_4.tif:0011-0567	1.467	55.936	0	421	60.472	58.06	0.656	82.083	7831	2.36	0.424	0.875	0.655828
784	NCS1_KAN358-6_4.tif:0012-0584	0.954	30.473	0	111	90.611	59.781	0.922	29.066	2773	1.246	0.803	0.901	0.232232
785	NCS1_KAN358-6_4.tif:0013-0649	0.87	208.133	19	835	121.063	66.52	0.814	181.074	17275	1.822	0.549	0.874	1.44674
786	NCS1_KAN358-6_4.tif:0014-0664	1.226	93.239	0	599	128.745	68	0.928	114.347	10909	1.215	0.823	0.925	0.913603
787	NCS1_KAN358-6_4.tif:0015-0679	0.964	297.957	0	1321	91.13	69.53	0.885	287.329	27412	1.38	0.724	0.934	2.29569
788	NCS1_KAN358-6_4.tif:0016-0692	1.216	67.379	0	305	7.549	70.828	0.844	81.926	7816	1.566	0.639	0.913	0.654572
789	NCS1_KAN358-6_4.tif:0017-0696	0.839	290.462	0	1041	92.033	71.298	0.973	243.567	23237	1.143	0.875	0.952	1.94604
790	NCS1_KAN358-6_4.tif:0018-0810	1.331	17.953	0	127	107.721	82.895	0.929	23.899	2280	1.15	0.869	0.91	0.190945
791	NCS1_KAN358-6_4.tif:0019-0814	1.3	56.823	0	295	77.615	83.442	0.774	73.855	7046	1.73	0.578	0.849	0.590086
792	NCS1_KAN358-6_4.tif:0020-0825	0.849	369.617	0	1878	95.406	84.509	0.95	313.816	29939	1.129	0.886	0.953	2.50732
793	NCS1_KAN358-6_4.tif:0021-0872	1.006	520.458	3	3683	97.321	89.305	0.954	523.716	49964	1.19	0.84	0.955	4.18437
794	NCS1_KAN358-6_4.tif:0022-0966	1.101	17.4	0	95	41.407	98.881	0.907	19.15	1827	1.273	0.785	0.95	0.153007
795	NCS1_KAN358-6_4.tif:0023-1013	0.933	76.64	0	259	80.533	103.679	0.845	71.497	6821	1.417	0.706	0.886	0.571243
796	NCS1_KAN358-6_4.tif:0024-1034	0.849	21.58	0	164	11.223	105.918	0.873	18.322	1748	1.826	0.548	0.953	0.146391
797	NCS1_KAN358-6_5.tif:0001-0156	0.912	33.034	0	124	122.713	15.945	0.938	30.125	2874	1.17	0.855	0.951	0.240691
798	NCS1_KAN358-6_5.tif:0002-0266	1.006	36.396	0	253	57.091	27.263	0.894	36.624	3494	1.398	0.715	0.955	0.292614
799	NCS1_KAN358-6_5.tif:0003-0322	1.006	55.323	0	209	3.515	33.022	0.883	55.669	5311	1.05	0.952	0.901	0.444784
800	NCS1_KAN358-6_5.tif:0004-0336	1.247	367.588	8	2393	76.358	34.399	0.801	458.508	43743	1.752	0.571	0.862	3.66337
801	NCS1_KAN358-6_5.tif:0005-0426	1.3	102.129	0	484	102.872	43.711	0.933	132.742	12664	1.205	0.83	0.912	1.06058
802	NCS1_KAN358-6_5.tif:0006-0461	0.88	26.226	0	150	76.895	47.172	0.875	23.092	2203	1.171	0.854	0.918	0.184496
803	NCS1_KAN358-6_5.tif:0007-0498	0.933	40.742	0	144	53.728	50.993	0.993	38.007	3626	1.023	0.978	0.952	0.303669
804	NCS1_KAN358-6_5.tif:0008-0596	0.964	29.413	0	256	20.604	61.03	0.885	28.364	2706	1.36	0.735	0.934	0.226621
805	NCS1_KAN358-6_5.tif:0009-0702	0.996	16.905	0	147	65.877	71.964	0.932	16.834	1606	1.137	0.879	0.922	0.134499
806	NCS1_KAN358-6_5.tif:0010-0805	1.132	14.815	0	69	19.053	82.439	0.938	16.771	1600	1.153	0.867	0.911	0.133996
807	NCS1_KAN358-6_5.tif:0011-0886	1.184	13.867	0	89	97.09	90.784	0.952	16.425	1567	1.231	0.813	0.922	0.131233
808	NCS1_KAN358-6_5.tif:0012-0936	1.216	36.267	0	275	51.99	95.944	0.883	44.097	4207	1.083	0.924	0.896	0.352326
809	NCS1_KAN358-6_5.tif:0013-0972	1.279	24.139	0	124	124.747	99.521	0.903	30.869	2945	1.073	0.932	0.931	0.246637
810	NCS1_KAN358-6_5.tif:0014-1034	0.943	55.711	0	342	82.801	105.88	0.777	52.556	5014	1.834	0.545	0.896	0.419911
811	NCS1_KAN358-6_6.tif:0001-0038	0.933	22.034	0	144	23.648	3.95	0.946	20.555	1961	1.137	0.88	0.913	0.164229
812	NCS1_KAN358-6_6.tif:0002-0289	1.457	45.309	0	389	77.403	29.55	0.803	66.015	6298	1.421	0.704	0.894	0.527443
813	NCS1_KAN358-6_6.tif:0003-0412	0.975	27.269	0	149	48.33	42.211	0.855	26.582	2536	1.295	0.772	0.89	0.212384
814	NCS1_KAN358-6_6.tif:0004-0427	1.677	64.438	0	422	114.923	43.833	0.795	108.068	10310	1.463	0.683	0.872	0.863438
815	NCS1_KAN358-6_6.tif:0005-0648	0.954	26.879	0	190	1.281	66.373	0.922	25.639	2446	1.106	0.904	0.901	0.204847
816	NCS1_KAN358-6_6.tif:0006-0665	1.457	29.576	0	149	119.606	68.14	0.901	43.091	4111	1.103	0.907	0.908	0.344287
817	NCS1_KAN358-6_6.tif:0007-0704	1.195	60.588	0	479	82.538	72.067	0.932	72.398	6907	1.293	0.773	0.923	0.578445
818	NCS1_KAN358-6_6.tif:0008-0723	1.08	209.194	0	688	105.492	73.994	0.803	225.853	21547	1.694	0.59	0.912	1.80451
819	NCS1_KAN358-6_6.tif:0009-0766	1.08	13.408	0	98	38.487	78.434	0.906	14.475	1381	1.369	0.731	0.916	0.115656
820	NCS1_KAN358-6_6.tif:0010-0785	1.143	126.606	0	698	111.095	80.334	0.891	144.65	13800	1.195	0.837	0.912	1.15572
821	NCS1_KAN358-6_6.tif:0011-0908	1.038	27.485	0	119	72.812	93.084	0.91	28.521	2721	1.196	0.836	0.947	0.227877
822	NCS1_KAN358-6_6.tif:0012-0910	1.321	79.611	0	709	7.32	93.215	0.775	105.144	10031	1.54	0.649	0.857	0.840073
										8659.4				0.725204
														0
														0
														0
823	NCS1_KAN358-7_1.tif:0001-0038	0.964	37.098	0	313	100.519	3.853	0.873	35.775	3413	1.342	0.745	0.911	0.285831
824	NCS1_KAN358-7_1.tif:0002-0068	1.059	60.901	0	242	6.486	7.036	0.9	64.474	6151	1.508	0.663	0.94	0.515132
825	NCS1_KAN358-7_1.tif:0003-0194	1.111	33.717	0	210	63.983	19.904	0.932	37.462	3574	1.123	0.891	0.934	0.299314
826	NCS1_KAN358-7_1.tif:0004-0208	1.163	119.063	0	584	91.132	21.247	0.866	138.528	13216	1.154	0.867	0.933	1.10681
827	NCS1_KAN358-7_1.tif:0005-0215	0.985	39.149	0	192	43.74	22.051	0.922	38.573	3680	1.242	0.805	0.922	0.308191
828	NCS1_KAN358-7_1.tif:0006-0315	1.279	17.115	0	107	136.879	32.319	0.929	21.886	2088	1.38	0.725	0.938	0.174865
829	NCS1_KAN358-7_1.tif:0007-0351	1.478	116.496	0	767	84.778	36.004	0.836	172.175	16426	1.667	0.6	0.907	1.37564
830	NCS1_KAN358-7_1.tif:0008-0472	0.891	8.635	0	45	9.577	48.388	0.916	7.694	734	1.233	0.811	0.934	0.0614708
831	NCS1_KAN358-7_1.tif:0009-0536	0.87	89.072	0	420	60.905	54.874	0.926	77.492	7393	1.032	0.969	0.922	0.619146
832	NCS1_KAN358-7_1.tif:0010-0597	1.132	95.306	0	406	100.639	61.081	0.894	107.89	10293	1.415	0.707	0.935	0.862015
833	NCS1_KAN358-7_1.tif:0011-0608	1.111	6.292	0	37	27.912	62.266	0.893	6.991	667	1.248	0.801	0.906	0.0558597
834	NCS1_KAN358-7_1.tif:0012-0628	1.027	3.398	0	19	132.845	64.31	0.862	3.49	333	1.604	0.624	0.907	0.027888
835	NCS1_KAN358-7_1.tif:0013-0846	1.446	86.638	0	469	107.963	86.596	0.827	125.321	11956	1.267	0.789	0.899	1.00129
836	NCS1_KAN358-7_1.tif:0014-0955	1.268	205.24	8	493	128.844	97.903	0.823	260.306	24834	1.381	0.724	0.91	2.07979
837	NCS1_KAN358-7_1.tif:0015-0976	0.86	56.463	0	345	8.049	99.924	0.928	48.531	4630	1.344	0.744	0.965	0.387752
838	NCS1_KAN358-7_1.tif:0016-1017	0.954	135.516	0	460	111.911	104.18	0.651	129.262	12332	2.697	0.371	0.897	1.03278
839	NCS1_KAN358-7_2.tif:0001-0106	1.184	90.885	0	522	115.543	10.882	0.896	107.649	10270	1.42	0.704	0.926	0.860088
840	NCS1_KAN358-7_2.tif:0002-0120	0.985	42.606	0	286	55.242	12.343	0.985	41.98	4005	1.016	0.984	0.917	0.335409
841	NCS1_KAN358-7_2.tif:0003-0281	1.216	88.724	0	627	101.718	28.766	0.977	107.879	10292	1.151	0.869	0.928	0.861931
842	NCS1_KAN358-7_2.tif:0004-0342	1.258	64.467	0	360	10.432	35.08	0.914	81.088	7736	1.2	0.833	0.913	0.647872
843	NCS1_KAN358-7_2.tif:0005-0471	1.111	69.774	0	390	28.978	48.255	0.882	77.524	7396	1.512	0.661	0.891	0.619398
844	NCS1_KAN358-7_2.tif:0006-0555	0.922	192.25	0	903	124.579	56.901	0.77	177.332	16918	2.212	0.452	0.946	1.41684
845	NCS1_KAN358-7_2.tif:0007-0559	1.017	36.392	0	144	70.672	57.279	0.88	37.001	3530	1.616	0.619	0.911	0.295629
846	NCS1_KAN358-7_2.tif:0008-0689	1.237	77.424	0	709	98.385	70.559	0.898	95.762	9136	1.64	0.61	0.929	0.765119
847	NCS1_KAN358-7_2.tif:0009-0797	1.09	86.087	0	299	22.805	81.627	0.956	93.844	8953	1.337	0.748	0.95	0.749793
848	NCS1_KAN358-7_2.tif:0010-0823	1.73	22.545	0	105	126.291	84.352	0.877	38.993	3720	1.344	0.744	0.932	0.311541
849	NCS1_KAN358-7_2.tif:0011-0923	0.87	51.807	0	260	50.825	94.518	0.926	45.072	4300	1.05	0.953	0.927	0.360115
850	NCS1_KAN358-7_2.tif:0012-0949	1.09	473.096	11	2554	98.781	97.135	0.887	515.728	49202	1.341	0.746	0.9	4.12055
851	NCS1_KAN358-7_3.tif:0001-0104	1.184	62.31	0	387	35.724	10.749	0.881	73.803	7041	1.37	0.73	0.946	0.589667
852	NCS1_KAN358-7_3.tif:0002-0140	1.038	117.253	0	675	123.143	14.4	0.882	121.673	11608	1.166	0.858	0.938	0.972143
853	NCS1_KAN358-7_3.tif:0003-0171	1.289	32.285	0	299	51.649	17.474	0.851	41.623	3971	1.519	0.658	0.908	0.332562
854	NCS1_KAN358-7_3.tif:0004-0208	1.478	73.454	0	527	104.094	21.319	0.765	108.561	10357	2.155	0.464	0.946	0.867375
855	NCS1_KAN358-7_3.tif:0005-0244	1.352	62.558	0	477	132.826	25.029	0.793	84.589	8070	1.496	0.668	0.884	0.675844
856	NCS1_KAN358-7_3.tif:0006-0293	1.027	88.878	0	410	25.334	29.973	0.918	91.297	8710	1.392	0.718	0.92	0.729442
857	NCS1_KAN358-7_3.tif:0007-0466	0.88	81.274	0	323	37.011	47.773	0.875	71.56	6827	1.283	0.779	0.923	0.571745
858	NCS1_KAN358-7_3.tif:0008-0471	0.954	87.945	0	454	78.09	48.239	0.905	83.886	8003	1.114	0.898	0.929	0.670233
859	NCS1_KAN358-7_3.tif:0009-0502	0.943	26.4	0	170	24.546	51.456	0.957	24.905	2376	1.352	0.739	0.933	0.198984
860	NCS1_KAN358-7_3.tif:0010-0571	1.331	69.732	0	267	125.577	58.391	0.929	92.827	8856	1.259	0.794	0.92	0.741669
861	NCS1_KAN358-7_3.tif:0011-0713	1.048	37.11	0	340	73.274	72.983	0.907	38.898	3711	1.311	0.763	0.901	0.310788
862	NCS1_KAN358-7_3.tif:0012-0733	0.912	253	19	1678	119.078	75.102	0.729	230.716	22011	2.398	0.417	0.911	1.84337
863	NCS1_KAN358-7_3.tif:0013-0838	1.195	62.421	0	459	4.843	85.872	0.868	74.589	7116	1.168	0.856	0.894	0.595948
864	NCS1_KAN358-7_3.tif:0014-0869	0.922	16.886	0	167	18.028	88.989	0.949	15.576	1486	1.173	0.853	0.951	0.124449
865	NCS1_KAN358-7_3.tif:0015-0871	1.258	101.908	0	582	118.325	89.187	0.877	128.183	12229	1.275	0.784	0.902	1.02415
866	NCS1_KAN358-7_3.tif:0016-0929	0.87	369.349	6	2080	111.454	95.116	0.94	321.332	30656	1.16	0.862	0.965	2.56737
867	NCS1_KAN358-7_3.tif:0017-0934	1.488	118.007	0	542	94.82	95.657	0.92	175.645	16757	1.321	0.757	0.925	1.40336
868	NCS1_KAN358-7_3.tif:0018-0954	1.08	85.291	0	431	54.55	97.721	0.918	92.083	8785	1.069	0.935	0.936	0.735723
869	NCS1_KAN358-7_3.tif:0019-0981	0.839	237.675	0	1305	117.732	100.442	0.745	199.302	19014	1.883	0.531	0.879	1.59238
870	NCS1_KAN358-7_3.tif:0020-1023	1.279	16.869	0	181	137.229	104.75	0.892	21.572	2058	1.337	0.748	0.897	0.172353
871	NCS1_KAN358-7_4.tif:0001-0118	1.3	102.573	0	610	87.179	12.065	0.762	133.319	12719	1.88	0.532	0.873	1.06519
872	NCS1_KAN358-7_4.tif:0002-0121	1.006	27.135	0	74	47.255	12.388	0.986	27.305	2605	1.115	0.897	0.95	0.218163
873	NCS1_KAN358-7_4.tif:0003-0238	1.52	60.345	0	517	34.772	24.402	0.778	91.716	8750	1.974	0.507	0.903	0.732792
874	NCS1_KAN358-7_4.tif:0004-0298	1.08	126.068	0	629	82.342	30.535	0.978	136.107	12985	1.208	0.828	0.954	1.08746
875	NCS1_KAN358-7_4.tif:0005-0412	1.111	6.406	0	43	6.307	42.162	0.904	7.117	679	1.393	0.718	0.938	0.0568647
876	NCS1_KAN358-7_4.tif:0006-0453	1.331	114.984	0	573	64.462	46.452	0.823	153.067	14603	1.204	0.83	0.876	1.22297
877	NCS1_KAN358-7_4.tif:0007-0485	1.226	152.581	0	726	97.377	49.674	0.917	187.122	17852	1.239	0.807	0.918	1.49506
878	NCS1_KAN358-7_4.tif:0008-0488	1.866	90.736	0	782	129.97	49.993	0.793	169.293	16151	1.318	0.759	0.85	1.35261
879	NCS1_KAN358-7_4.tif:0009-0552	0.86	270.5	22	1043	101.971	56.565	0.997	232.498	22181	1.154	0.867	0.965	1.85761
880	NCS1_KAN358-7_4.tif:0010-0642	0.849	3.852	0	24	52.053	65.734	0.95	3.27	312	1.117	0.895	0.953	0.0261293
881	NCS1_KAN358-7_4.tif:0011-0651	1.111	106.821	0	488	87.458	66.668	0.932	118.686	11323	1.244	0.804	0.93	0.948275
882	NCS1_KAN358-7_4.tif:0012-0663	1.258	83.025	0	506	14.053	67.862	0.925	104.431	9963	1.296	0.772	0.938	0.834378
883	NCS1_KAN358-7_4.tif:0013-0669	1.08	126.728	0	552	123.489	68.508	0.918	136.82	13053	1.241	0.805	0.945	1.09316
884	NCS1_KAN358-7_4.tif:0014-0790	1.415	73.363	0	514	2.186	81.012	0.884	103.812	9904	1.056	0.947	0.931	0.829437
885	NCS1_KAN358-7_4.tif:0015-0791	1.163	362.333	0	1545	104.879	81	0.918	421.57	40219	1.372	0.729	0.949	3.36825
886	NCS1_KAN358-7_4.tif:0016-0873	1.111	87.406	0	482	44.393	89.455	0.949	97.114	9265	1.278	0.782	0.922	0.775922
887	NCS1_KAN358-7_4.tif:0017-0877	1.321	98.127	0	575	124.117	89.809	0.871	129.598	12364	1.185	0.844	0.906	1.03546
888	NCS1_KAN358-7_4.tif:0018-0920	1.373	73.763	0	571	132.91	94.253	0.773	101.286	9663	1.546	0.647	0.903	0.809254
889	NCS1_KAN358-7_4.tif:0019-0970	1.006	102.125	0	549	76.786	99.367	0.941	102.764	9804	1.04	0.961	0.928	0.821062
890	NCS1_KAN358-7_4.tif:0020-0972	1.069	30.637	0	227	83.457	99.526	0.968	32.756	3125	1.069	0.935	0.949	0.261711
891	NCS1_KAN358-7_5.tif:0001-0018	0.88	286.81	8	1247	75.592	1.844	0.808	252.529	24092	1.656	0.604	0.894	2.01765
892	NCS1_KAN358-7_5.tif:0002-0188	0.933	71.551	0	270	87.878	19.217	0.915	66.748	6368	1.29	0.775	0.918	0.533305
893	NCS1_KAN358-7_5.tif:0003-0320	1.331	67.37	0	428	70.132	32.818	0.855	89.683	8556	1.286	0.778	0.898	0.716545
894	NCS1_KAN358-7_5.tif:0004-0346	1.331	107.165	0	640	112.892	35.451	0.913	142.658	13610	1.352	0.739	0.93	1.13981
895	NCS1_KAN358-7_5.tif:0005-0346	1.132	70.25	0	449	11.757	35.389	0.921	79.526	7587	1.213	0.825	0.935	0.635393
896	NCS1_KAN358-7_5.tif:0006-0481	0.88	376.119	0	1984	139.281	49.235	0.985	331.164	31594	1.121	0.892	0.971	2.64592
897	NCS1_KAN358-7_5.tif:0007-0490	0.839	240.85	9	1137	36.503	50.186	0.77	201.964	19268	1.874	0.534	0.879	1.61365
898	NCS1_KAN358-7_5.tif:0008-0508	1.499	108.972	0	572	78.787	52.039	0.902	163.339	15583	1.148	0.871	0.914	1.30504
899	NCS1_KAN358-7_5.tif:0009-0518	1.31	101.648	0	671	134.694	53.018	0.925	133.183	12706	1.312	0.762	0.933	1.0641
900	NCS1_KAN358-7_5.tif:0010-0547	0.901	30.535	0	120	13.783	56.035	0.946	27.525	2626	1.155	0.866	0.92	0.219921
901	NCS1_KAN358-7_5.tif:0011-0590	1.205	48.826	0	276	58.12	60.414	0.94	58.856	5615	1.219	0.82	0.927	0.470243
902	NCS1_KAN358-7_5.tif:0012-0810	1.352	94.333	0	627	107.783	82.942	0.943	127.554	12169	1.298	0.77	0.925	1.01913
903	NCS1_KAN358-7_5.tif:0013-0818	1.006	19.271	0	89	141.88	83.771	0.819	19.391	1850	1.517	0.659	0.897	0.154933
904	NCS1_KAN358-7_5.tif:0014-0835	1.048	49.2	0	322	32.36	85.486	0.919	51.571	4920	1.263	0.792	0.926	0.412038
905	NCS1_KAN358-7_5.tif:0015-0839	1.09	88.356	0	633	84.203	85.963	0.956	96.318	9189	1.236	0.809	0.941	0.769557
906	NCS1_KAN358-7_5.tif:0016-0846	1.048	180.84	5	549	111.248	86.668	0.749	189.554	18084	2.152	0.465	0.885	1.51449
907	NCS1_KAN358-7_5.tif:0017-0911	1.74	122.693	0	703	116.144	93.321	0.841	213.484	20367	1.115	0.896	0.917	1.70569
908	NCS1_KAN358-7_5.tif:0018-0922	1.216	49.026	0	293	47.003	94.374	0.92	59.61	5687	1.308	0.765	0.932	0.476273
909	NCS1_KAN358-7_5.tif:0019-0969	0.839	147.6	18	282	103.775	99.261	0.745	123.77	11808	1.215	0.823	0.842	0.988892
910	NCS1_KAN358-7_6.tif:0001-0040	1.027	38.316	0	321	45.747	4.088	0.993	39.359	3755	1.171	0.854	0.929	0.314472
911	NCS1_KAN358-7_6.tif:0002-0114	1.226	37.265	0	405	119.86	11.71	0.917	45.701	4360	1.264	0.791	0.903	0.36514
912	NCS1_KAN358-7_6.tif:0003-0181	1.153	24.827	0	198	99.755	18.573	0.91	28.626	2731	1.343	0.745	0.936	0.228715
913	NCS1_KAN358-7_6.tif:0004-0274	1.111	25.849	0	132	126.018	28.091	0.944	28.72	2740	1.047	0.955	0.951	0.229469
914	NCS1_KAN358-7_6.tif:0005-0288	1.184	73.31	0	234	138.294	29.554	0.886	86.832	8284	1.178	0.849	0.883	0.693766
915	NCS1_KAN358-7_6.tif:0006-0340	1.31	11.624	0	93	85.185	34.828	0.864	15.23	1453	1.468	0.681	0.909	0.121685
916	NCS1_KAN358-7_6.tif:0007-0478	1.258	52.425	0	309	27.436	49.02	0.941	65.941	6291	1.411	0.709	0.92	0.526857
917	NCS1_KAN358-7_6.tif:0008-0527	1.101	97.676	0	607	56.174	53.92	0.924	107.502	10256	1.092	0.915	0.909	0.858916
918	NCS1_KAN358-7_6.tif:0009-0635	1.027	39.52	0	341	91.219	65.02	0.93	40.596	3873	1.349	0.741	0.925	0.324355
919	NCS1_KAN358-7_6.tif:0010-0717	1.268	70.19	0	423	69.705	73.342	0.87	89.022	8493	1.359	0.736	0.903	0.711269
920	NCS1_KAN358-7_6.tif:0011-0795	1.174	52.277	0	494	15.268	81.402	0.806	61.371	5855	1.543	0.648	0.868	0.490343
921	NCS1_KAN358-7_6.tif:0012-0799	1.258	67.808	0	370	98.598	81.786	0.952	85.291	8137	1.168	0.856	0.945	0.681455
922	NCS1_KAN358-7_6.tif:0013-0856	1.289	82.683	0	444	134.085	87.646	0.806	106.601	10170	1.666	0.6	0.911	0.851714
923	NCS1_KAN358-7_6.tif:0014-0901	1.163	84.081	0	406	48.721	92.274	0.881	97.827	9333	1.213	0.825	0.91	0.781617
924	NCS1_KAN358-7_6.tif:0015-0932	0.996	163.074	0	599	130.84	95.469	0.711	162.385	15492	1.969	0.508	0.841	1.29742
										9348.14				0.782885
														0
														0
														0
925	NCS1_KAN358-8_1.tif:0001-0147	1.153	2.809	0	15	120.543	15.132	0.926	3.239	309	1.237	0.808	0.909	0.025878
926	NCS1_KAN358-8_1.tif:0002-0206	1.059	2.416	0	12	75.347	21.137	0.861	2.558	244	1.661	0.602	0.918	0.0204344
927	NCS1_KAN358-8_1.tif:0003-0234	1.006	2.385	0	14	36.587	23.949	0.941	2.4	229	1.191	0.84	0.932	0.0191782
928	NCS1_KAN358-8_1.tif:0004-0262	1.017	3.216	0	14	84.765	26.824	0.921	3.27	312	1.342	0.745	0.924	0.0261293
929	NCS1_KAN358-8_1.tif:0005-0301	0.901	2.721	0	15	6.83	30.85	0.946	2.453	234	1.306	0.766	0.92	0.019597
930	NCS1_KAN358-8_1.tif:0006-0322	0.975	12.516	0	101	102.14	32.932	0.924	12.201	1164	1.154	0.867	0.939	0.0974823
931	NCS1_KAN358-8_1.tif:0007-0380	1.006	3.49	0	16	123.501	38.969	0.911	3.511	335	1.127	0.888	0.919	0.0280555
932	NCS1_KAN358-8_1.tif:0008-0511	1.153	4.218	0	24	48.432	52.376	0.899	4.864	464	1.151	0.869	0.917	0.0388589
933	NCS1_KAN358-8_1.tif:0009-0588	1.048	2.5	0	9	25.041	60.245	0.949	2.62	250	1.136	0.88	0.93	0.0209369
934	NCS1_KAN358-8_1.tif:0010-0648	1.059	3.564	0	20	95.543	66.331	0.946	3.773	360	1.29	0.775	0.918	0.0301492
935	NCS1_KAN358-8_1.tif:0011-0690	1.038	2.909	0	14	73.217	70.729	0.958	3.019	288	1.151	0.869	0.912	0.0241193
936	NCS1_KAN358-8_1.tif:0012-0691	1.059	4.287	0	55	131.046	70.754	0.959	4.539	433	1.184	0.844	0.94	0.0362627
937	NCS1_KAN358-8_1.tif:0013-0719	0.87	4.108	0	31	8.203	73.61	0.882	3.574	341	1.227	0.815	0.897	0.028558
938	NCS1_KAN358-8_1.tif:0014-0860	1.153	5.064	0	34	100.983	88.034	0.967	5.838	557	1.07	0.934	0.932	0.0466474
939	NCS1_KAN358-8_1.tif:0015-0871	0.964	5.141	0	29	41.379	89.16	0.902	4.958	473	1.289	0.776	0.902	0.0396126
940	NCS1_KAN358-8_1.tif:0016-0955	1.038	6.475	0	50	139.139	97.793	0.922	6.719	641	1.12	0.893	0.957	0.0536822
941	NCS1_KAN358-8_1.tif:0017-1008	1.017	2.732	0	12	71.41	103.254	0.909	2.778	265	1.137	0.88	0.894	0.0221931
942	NCS1_KAN358-8_2.tif:0001-0134	1.059	5.168	0	34	20.042	13.727	0.977	5.472	522	1.117	0.895	0.918	0.0437163
943	NCS1_KAN358-8_2.tif:0002-0147	0.933	2.393	0	10	116.316	15.168	0.915	2.233	213	1.115	0.897	0.908	0.0178383
944	NCS1_KAN358-8_2.tif:0003-0172	1.111	2.368	0	13	62.238	17.615	0.904	2.631	251	1.109	0.902	0.922	0.0210207
945	NCS1_KAN358-8_2.tif:0004-0174	1.216	2.784	0	14	85.184	17.85	0.925	3.386	323	1.188	0.842	0.885	0.0270505
946	NCS1_KAN358-8_2.tif:0005-0295	1.111	3.934	0	22	40.786	30.206	0.962	4.371	417	1.212	0.825	0.934	0.0349228
947	NCS1_KAN358-8_2.tif:0006-0404	0.88	2.548	0	15	70.428	41.384	0.888	2.243	214	1.18	0.847	0.966	0.017922
948	NCS1_KAN358-8_2.tif:0007-0446	1.027	3.316	0	14	117.75	45.654	0.93	3.407	325	1.322	0.757	0.92	0.027218
949	NCS1_KAN358-8_2.tif:0008-0484	1.111	3.123	0	15	9.012	49.569	0.944	3.469	331	1.304	0.767	0.955	0.0277205
950	NCS1_KAN358-8_2.tif:0009-0558	0.964	3.37	0	16	37.853	57.121	0.959	3.249	310	1.018	0.982	0.968	0.0259618
951	NCS1_KAN358-8_2.tif:0010-0560	1.195	4.018	0	24	78.032	57.46	0.868	4.801	458	1.416	0.706	0.898	0.0383564
952	NCS1_KAN358-8_2.tif:0011-0686	0.996	2.347	0	13	22.199	70.269	0.944	2.337	223	1.148	0.871	0.945	0.0186757
953	NCS1_KAN358-8_2.tif:0012-0752	1.205	3.504	0	26	122.873	77.021	0.912	4.224	403	1.467	0.682	0.939	0.0337503
954	NCS1_KAN358-8_2.tif:0013-0816	1.038	2.667	0	14	15.917	83.538	0.927	2.767	264	1.363	0.734	0.908	0.0221094
955	NCS1_KAN358-8_2.tif:0014-0825	0.891	3.071	0	12	80.865	84.438	0.949	2.736	261	1.072	0.933	0.929	0.0218581
956	NCS1_KAN358-8_2.tif:0015-0961	1.415	2.859	0	15	129.866	98.398	0.898	4.046	386	1.393	0.718	0.922	0.0323266
957	NCS1_KAN358-8_2.tif:0016-1014	1.195	4.746	0	28	17.462	103.843	0.96	5.671	541	1.249	0.801	0.923	0.0453075
958	NCS1_KAN358-8_3.tif:0001-0054	0.985	2.372	0	11	136.362	5.587	0.953	2.337	223	1.299	0.77	0.931	0.0186757
959	NCS1_KAN358-8_3.tif:0002-0113	0.912	2.966	0	14	47.454	11.6	0.894	2.704	258	1.634	0.612	0.935	0.0216069
960	NCS1_KAN358-8_3.tif:0003-0117	0.912	2.598	0	13	4.72	12.007	0.957	2.369	226	1.085	0.922	0.93	0.018927
961	NCS1_KAN358-8_3.tif:0004-0330	0.86	3.366	0	22	130.657	33.781	0.968	2.893	276	1.187	0.842	0.906	0.0231144
962	NCS1_KAN358-8_3.tif:0005-0363	1.08	2.738	0	12	62.257	37.185	0.89	2.956	282	1.413	0.708	0.963	0.0236168
963	NCS1_KAN358-8_3.tif:0006-0436	1.132	3.13	0	16	100.291	44.753	0.846	3.543	338	1.236	0.809	0.885	0.0283067
964	NCS1_KAN358-8_3.tif:0007-0548	1.174	2.768	0	17	136.969	56.133	0.889	3.249	310	1.44	0.694	0.911	0.0259618
965	NCS1_KAN358-8_3.tif:0008-0567	1.048	3.35	0	19	112.318	58.071	0.88	3.511	335	1.363	0.734	0.901	0.0280555
966	NCS1_KAN358-8_3.tif:0009-0593	0.964	3.37	0	35	34.28	60.694	0.902	3.249	310	1.277	0.783	0.906	0.0259618
967	NCS1_KAN358-8_3.tif:0010-0755	0.87	3.145	0	16	110.139	77.329	0.995	2.736	261	1.039	0.963	0.933	0.0218581
968	NCS1_KAN358-8_3.tif:0011-0895	0.943	2.056	0	8	75.333	91.727	0.802	1.939	185	1.514	0.661	0.891	0.0154933
969	NCS1_KAN358-8_3.tif:0012-0962	1.143	5.532	0	22	123.01	98.58	0.865	6.321	603	1.471	0.68	0.916	0.0504998
970	NCS1_KAN358-8_4.tif:0001-0059	0.964	5.837	0	30	25.82	6.105	0.902	5.629	537	1.241	0.806	0.898	0.0449725
971	NCS1_KAN358-8_4.tif:0002-0130	1.059	2.248	0	12	94.179	13.375	0.888	2.379	227	1.376	0.727	0.902	0.0190107
972	NCS1_KAN358-8_4.tif:0003-0131	0.86	1.817	0	9	73.421	13.399	0.948	1.562	149	1.124	0.889	0.927	0.0124784
973	NCS1_KAN358-8_4.tif:0004-0133	1.247	2.395	0	23	52.244	13.644	0.917	2.987	285	1.266	0.79	0.937	0.0238681
974	NCS1_KAN358-8_4.tif:0005-0213	1.08	2.612	0	12	20.362	21.893	0.906	2.82	269	1.325	0.755	0.92	0.0225281
975	NCS1_KAN358-8_4.tif:0006-0304	1.143	4.248	0	29	131.689	31.197	0.913	4.853	463	1.481	0.675	0.969	0.0387752
976	NCS1_KAN358-8_4.tif:0007-0473	1.006	2.281	0	12	86.748	48.442	0.911	2.296	219	1.269	0.788	0.91	0.0183407
977	NCS1_KAN358-8_4.tif:0008-0481	1.174	2.545	0	13	138.272	49.259	0.955	2.987	285	1.14	0.877	0.941	0.0238681
978	NCS1_KAN358-8_4.tif:0009-0487	1.195	2.825	0	14	40.029	49.874	0.932	3.375	322	1.159	0.863	0.934	0.0269667
979	NCS1_KAN358-8_4.tif:0010-0566	1.216	3.414	0	19	117.968	57.921	0.948	4.151	396	1.248	0.801	0.928	0.0331641
980	NCS1_KAN358-8_4.tif:0011-0581	1.143	3.009	0	17	50.379	59.562	0.891	3.438	328	1.165	0.858	0.89	0.0274692
981	NCS1_KAN358-8_4.tif:0012-0586	1.038	2.687	0	12	0.743	60.013	0.971	2.788	266	1.068	0.937	0.938	0.0222769
982	NCS1_KAN358-8_4.tif:0013-0714	0.954	3.11	0	17	57.08	73.116	0.892	2.966	283	1.488	0.672	0.901	0.0237006
983	NCS1_KAN358-8_4.tif:0014-0816	1.174	2.652	0	14	80.262	83.523	0.915	3.113	297	1.339	0.747	0.922	0.0248731
984	NCS1_KAN358-8_4.tif:0015-0892	1.132	8.25	0	92	94.832	91.332	0.98	9.339	891	1.086	0.921	0.931	0.0746192
985	NCS1_KAN358-8_4.tif:0016-0988	1.122	2.495	0	11	45.221	101.151	0.941	2.799	267	1.205	0.83	0.926	0.0223606
986	NCS1_KAN358-8_4.tif:0017-0991	1.405	6.022	0	36	137.774	101.429	0.927	8.459	807	1.255	0.797	0.924	0.0675844
987	NCS1_KAN358-8_4.tif:0018-1017	1.027	3.51	0	24	9.862	104.151	0.993	3.606	344	1.033	0.968	0.938	0.0288092
988	NCS1_KAN358-8_5.tif:0001-0145	1.237	2.059	0	10	115.615	14.859	0.936	2.547	243	1.215	0.823	0.937	0.0203507
989	NCS1_KAN358-8_5.tif:0002-0189	1.363	2.038	0	10	22.65	19.355	0.861	2.778	265	1.786	0.56	0.963	0.0221931
990	NCS1_KAN358-8_5.tif:0003-0312	0.964	2.859	0	15	58.023	31.935	0.927	2.757	263	1.092	0.916	0.963	0.0220256
991	NCS1_KAN358-8_5.tif:0004-0396	1.006	3.479	0	15	87.929	40.593	0.986	3.501	334	1.078	0.928	0.946	0.0279717
992	NCS1_KAN358-8_5.tif:0005-0444	1.027	3.255	0	20	116.39	45.477	0.943	3.344	319	1.139	0.878	0.951	0.0267155
993	NCS1_KAN358-8_5.tif:0006-0485	0.86	4.89	0	21	66.068	49.711	0.983	4.203	401	1.224	0.817	0.927	0.0335828
994	NCS1_KAN358-8_5.tif:0007-0609	1.405	4.03	0	38	8.087	62.429	0.902	5.66	540	1.33	0.752	0.934	0.0452237
995	NCS1_KAN358-8_5.tif:0008-0673	1.3	3.234	0	22	138.358	68.882	0.917	4.203	401	1.122	0.891	0.915	0.0335828
996	NCS1_KAN358-8_5.tif:0009-0706	1.509	4.639	0	31	119.462	72.304	0.854	7.002	668	1.582	0.632	0.92	0.0559434
997	NCS1_KAN358-8_5.tif:0010-0704	0.996	2.168	0	10	25.116	72.132	0.914	2.159	206	1.29	0.775	0.945	0.017252
998	NCS1_KAN358-8_5.tif:0011-0743	0.996	3.411	0	18	74.32	76.064	0.932	3.396	324	1.292	0.774	0.918	0.0271342
999	NCS1_KAN358-8_5.tif:0012-0814	1.027	2.245	0	12	98.613	83.435	0.943	2.306	220	1.089	0.919	0.961	0.0184245
1000	NCS1_KAN358-8_5.tif:0013-0850	1.226	4.222	0	37	40.194	87.075	0.787	5.178	494	1.418	0.705	0.863	0.0413713
1001	NCS1_KAN358-8_5.tif:0014-0971	1.09	2.75	0	11	8.752	99.414	0.876	2.998	286	1.219	0.82	0.885	0.0239518
1002	NCS1_KAN358-8_5.tif:0015-1014	1.467	2.8	0	13	91.424	103.813	0.897	4.109	392	1.289	0.776	0.9	0.0328291
1003	NCS1_KAN358-8_6.tif:0001-0045	0.975	2.43	0	12	80.08	4.656	0.956	2.369	226	1.115	0.897	0.939	0.018927
1004	NCS1_KAN358-8_6.tif:0002-0185	0.964	3.196	0	35	104.854	19.053	0.835	3.082	294	1.362	0.734	0.88	0.0246218
1005	NCS1_KAN358-8_6.tif:0003-0194	0.922	5.057	0	41	4.082	19.887	0.968	4.664	445	1.154	0.867	0.921	0.0372677
1006	NCS1_KAN358-8_6.tif:0004-0222	0.943	2.367	0	11	25.194	22.757	0.957	2.233	213	1.143	0.875	0.933	0.0178383
1007	NCS1_KAN358-8_6.tif:0005-0229	1.163	2.919	0	21	131.388	23.441	0.855	3.396	324	1.475	0.678	0.917	0.0271342
1008	NCS1_KAN358-8_6.tif:0006-0253	0.985	2.755	0	12	48.165	25.982	0.953	2.715	259	1.019	0.981	0.908	0.0216906
1009	NCS1_KAN358-8_6.tif:0007-0261	1.331	3.693	0	18	134.241	26.653	0.855	4.916	469	1.391	0.719	0.898	0.0392777
1010	NCS1_KAN358-8_6.tif:0008-0307	1.048	3.79	0	27	73.011	31.437	0.907	3.973	379	1.334	0.75	0.913	0.0317404
1011	NCS1_KAN358-8_6.tif:0009-0445	0.933	2.157	0	11	11.503	45.545	0.946	2.013	192	1.159	0.863	0.922	0.0160796
1012	NCS1_KAN358-8_6.tif:0010-0491	1.101	4.162	0	29	120.157	50.274	0.935	4.581	437	1.03	0.971	0.95	0.0365977
1013	NCS1_KAN358-8_6.tif:0011-0793	0.943	3.033	0	14	24.827	81.184	0.99	2.862	273	1.137	0.879	0.938	0.0228631
1014	NCS1_KAN358-8_6.tif:0012-0966	1.205	2.47	0	19	124.786	99	0.891	2.977	284	1.05	0.953	0.888	0.0237843
										352.6				0.0295294
														0
														0
														0
1015	NCS1_KAN358-9_1.tif:0001-0054	1.017	18.567	0	98	90.055	5.585	0.951	18.878	1801	1.046	0.956	0.924	0.15083
1016	NCS1_KAN358-9_1.tif:0002-0075	1.509	215.896	18	943	109.249	7.77	0.674	325.871	31089	2.428	0.412	0.862	2.60363
1017	NCS1_KAN358-9_1.tif:0003-0161	1.635	240.506	9	936	97.127	16.504	0.775	393.269	37519	2.075	0.482	0.884	3.14213
1018	NCS1_KAN358-9_1.tif:0004-0166	1.143	9.294	0	47	42.348	16.948	0.891	10.618	1013	1.103	0.906	0.905	0.0848364
1019	NCS1_KAN358-9_1.tif:0005-0201	1.279	9.311	0	77	112.998	20.576	0.918	11.907	1136	1.243	0.805	0.907	0.0951373
1020	NCS1_KAN358-9_1.tif:0006-0343	1.027	16	0	114	20.297	35.045	0.889	16.436	1568	1.169	0.855	0.895	0.131316
1021	NCS1_KAN358-9_1.tif:0007-0371	0.996	54.105	0	414	46.872	38.075	0.932	53.877	5140	1.179	0.848	0.918	0.430463
1022	NCS1_KAN358-9_1.tif:0008-0395	1.321	49.381	0	308	127.534	40.436	0.921	65.218	6222	1.057	0.946	0.91	0.521078
1023	NCS1_KAN358-9_1.tif:0009-0410	0.87	300.181	0	1289	95.517	42.015	0.974	261.156	24915	1.105	0.905	0.965	2.08657
1024	NCS1_KAN358-9_1.tif:0010-0421	0.87	12.386	0	60	87.101	43.102	0.959	10.775	1028	1.113	0.899	0.933	0.0860926
1025	NCS1_KAN358-9_1.tif:0011-0442	0.954	276.209	1	1020	100.958	45.257	0.948	263.462	25135	1.031	0.969	0.958	2.105
1026	NCS1_KAN358-9_1.tif:0012-0533	1.038	14.364	0	130	37.559	54.62	0.958	14.905	1422	1.151	0.869	0.908	0.119089
1027	NCS1_KAN358-9_1.tif:0013-0716	0.985	27.67	0	124	98.725	73.266	0.802	27.263	2601	1.64	0.61	0.891	0.217828
1028	NCS1_KAN358-9_1.tif:0014-0736	1.247	27.336	0	172	19.829	75.333	0.906	34.097	3253	1.106	0.904	0.908	0.272431
1029	NCS1_KAN358-9_1.tif:0015-0799	0.912	14.713	0	68	0.848	81.869	0.957	13.417	1280	1.155	0.866	0.926	0.107197
1030	NCS1_KAN358-9_1.tif:0016-0841	0.901	156.465	9	557	103.202	86.17	0.652	141.044	13456	2.045	0.489	0.815	1.12691
1031	NCS1_KAN358-9_1.tif:0017-0879	1.184	8.212	0	66	65.052	90.045	0.923	9.727	928	1.389	0.72	0.934	0.0777178
1032	NCS1_KAN358-9_1.tif:0018-0901	0.985	20.713	0	125	41.226	92.25	0.864	20.408	1947	1.253	0.798	0.908	0.163057
1033	NCS1_KAN358-9_1.tif:0019-0928	0.87	54.169	0	276	81.144	94.983	0.94	47.126	4496	1.085	0.921	0.965	0.376529
1034	NCS1_KAN358-9_1.tif:0020-0952	0.964	24.304	0	84	21.926	97.543	0.914	23.437	2236	1.162	0.86	0.934	0.18726
1035	NCS1_KAN358-9_1.tif:0021-0965	1.101	36.41	0	312	111.951	98.766	0.869	40.072	3823	1.535	0.651	0.929	0.320167
1036	NCS1_KAN358-9_1.tif:0022-1010	1.195	229.965	0	1162	80.045	103.543	0.708	274.792	26216	2.164	0.462	0.87	2.19553
1037	NCS1_KAN358-9_2.tif:0001-0145	1.258	7.65	0	79	67.612	14.847	0.941	9.622	918	1.302	0.768	0.92	0.0768804
1038	NCS1_KAN358-9_2.tif:0002-0231	1.059	6.495	0	43	44.116	23.574	0.747	6.876	656	1.529	0.654	0.835	0.0549385
1039	NCS1_KAN358-9_2.tif:0003-0299	1.017	19.629	0	121	31.373	30.601	0.88	19.957	1904	1.41	0.709	0.898	0.159456
1040	NCS1_KAN358-9_2.tif:0004-0428	1.279	2.443	0	15	99.727	43.864	0.929	3.124	298	1.334	0.749	0.917	0.0249568
1041	NCS1_KAN358-9_2.tif:0005-0503	1.184	11.177	0	82	29.266	51.498	0.952	13.239	1263	1.484	0.674	0.938	0.105773
1042	NCS1_KAN358-9_2.tif:0006-0570	1.163	10.036	0	91	64.662	58.381	0.935	11.677	1114	1.216	0.823	0.925	0.0932949
1043	NCS1_KAN358-9_2.tif:0007-0707	1.488	15.014	0	108	122.06	72.393	0.9	22.347	2132	1.508	0.663	0.904	0.17855
1044	NCS1_KAN358-9_2.tif:0008-0719	1.3	15.395	0	111	3.056	73.654	0.803	20.01	1909	1.475	0.678	0.879	0.159874
1045	NCS1_KAN358-9_2.tif:0009-0738	1.373	74.397	0	703	93.534	75.63	0.728	102.156	9746	1.898	0.527	0.885	0.816205
1046	NCS1_KAN358-9_2.tif:0010-0771	1.111	9	0	46	42.213	78.954	0.904	10	954	1.256	0.796	0.93	0.0798953
1047	NCS1_KAN358-9_2.tif:0011-0952	0.891	358.918	1	2308	11.582	97.454	1	319.781	30508	1.064	0.94	0.95	2.55497
1048	NCS1_KAN358-9_3.tif:0001-0182	1.122	13.729	0	95	86.164	18.582	0.941	15.398	1469	1.249	0.8	0.939	0.123025
1049	NCS1_KAN358-9_3.tif:0002-0314	0.839	17.925	0	168	138.068	32.221	0.959	15.031	1434	1.257	0.796	0.925	0.120094
1050	NCS1_KAN358-9_3.tif:0003-0427	0.975	14.914	0	74	32.499	43.723	0.855	14.538	1387	1.571	0.637	0.925	0.116158
1051	NCS1_KAN358-9_3.tif:0004-0500	1.247	17.84	0	66	77.425	51.233	0.856	22.253	2123	1.528	0.655	0.919	0.177796
1052	NCS1_KAN358-9_3.tif:0005-0571	1.583	215.351	0	1027	59.861	58.537	0.683	340.849	32518	2.396	0.417	0.888	2.72331
1053	NCS1_KAN358-9_3.tif:0006-0611	1.153	49.509	0	274	113.706	62.627	0.938	57.084	5446	1.236	0.809	0.948	0.45609
1054	NCS1_KAN358-9_3.tif:0007-0626	0.943	4.778	0	22	34.779	64.105	0.9	4.507	430	1.202	0.832	0.882	0.0360115
1055	NCS1_KAN358-9_3.tif:0008-0716	0.922	3.034	0	15	85.088	73.313	0.982	2.799	267	1.019	0.981	0.951	0.0223606
1056	NCS1_KAN358-9_3.tif:0009-0729	1.415	256.8	0	1795	139.189	74.619	0.714	363.385	34668	1.464	0.683	0.865	2.90336
1057	NCS1_KAN358-9_3.tif:0010-0778	1.027	12.041	0	49	67.083	79.618	0.93	12.369	1180	1.263	0.792	0.92	0.0988222
1058	NCS1_KAN358-9_3.tif:0011-0912	1.08	3.718	0	32	1.449	93.4	0.935	4.015	383	1.332	0.751	0.92	0.0320754
1059	NCS1_KAN358-9_3.tif:0012-0965	1.384	54.682	0	409	93.465	98.801	0.903	75.658	7218	1.372	0.729	0.901	0.604491
1060	NCS1_KAN358-9_4.tif:0001-0229	0.954	21.56	0	170	90.853	23.534	0.922	20.565	1962	1.536	0.651	0.919	0.164313
1061	NCS1_KAN358-9_4.tif:0002-0271	1.048	5.46	0	31	134.249	27.785	0.842	5.723	546	1.615	0.619	0.897	0.0457262
1062	NCS1_KAN358-9_4.tif:0003-0284	0.922	7.659	0	51	57.613	29.098	0.917	7.065	674	1.267	0.789	0.951	0.0564459
1063	NCS1_KAN358-9_4.tif:0004-0356	1.132	11.833	0	95	75.434	36.468	0.846	13.396	1278	1.466	0.682	0.871	0.10703
1064	NCS1_KAN358-9_4.tif:0005-0463	1.426	87.471	0	624	106.193	47.435	0.836	124.692	11896	1.477	0.677	0.91	0.996262
1065	NCS1_KAN358-9_4.tif:0006-0585	1.048	8.35	0	88	106.463	59.876	0.719	8.752	835	1.408	0.71	0.837	0.0699293
1066	NCS1_KAN358-9_4.tif:0007-0629	0.985	16.16	0	68	13.731	64.429	0.934	15.922	1519	1.129	0.886	0.954	0.127213
1067	NCS1_KAN358-9_4.tif:0008-0735	0.891	5.376	0	29	52.759	75.227	0.935	4.79	457	1.059	0.945	0.904	0.0382727
1068	NCS1_KAN358-9_4.tif:0009-0761	0.86	10.146	0	50	63.622	78.002	0.915	8.721	832	1.217	0.822	0.932	0.0696781
1069	NCS1_KAN358-9_4.tif:0010-0845	1.101	8.952	0	62	120.875	86.522	0.924	9.853	940	1.294	0.773	0.921	0.0787228
1070	NCS1_KAN358-9_4.tif:0011-0865	1.289	6.748	0	114	11.346	88.553	0.952	8.7	830	1.215	0.823	0.914	0.0695106
1071	NCS1_KAN358-9_4.tif:0012-0905	1.352	3.674	0	22	78.146	92.62	0.882	4.968	474	1.365	0.733	0.89	0.0396964
1072	NCS1_KAN358-9_5.tif:0001-0049	0.933	2.607	0	9	63.785	5.108	0.915	2.432	232	1.313	0.761	0.922	0.0194295
1073	NCS1_KAN358-9_5.tif:0002-0056	0.975	40.527	0	208	44.169	5.737	0.844	39.506	3769	1.685	0.593	0.89	0.315645
1074	NCS1_KAN358-9_5.tif:0003-0093	0.849	3.617	0	24	31.257	9.566	0.936	3.071	293	1.219	0.82	0.91	0.0245381
1075	NCS1_KAN358-9_5.tif:0004-0107	1.331	5.378	0	53	121.172	10.97	0.903	7.159	683	1.285	0.778	0.907	0.0571997
1076	NCS1_KAN358-9_5.tif:0005-0117	0.849	21.37	0	165	99.587	12.007	0.904	18.144	1731	1.266	0.79	0.915	0.144967
1077	NCS1_KAN358-9_5.tif:0006-0146	1.038	292.556	18	1313	49.613	14.943	0.674	303.586	28963	1.998	0.5	0.802	2.42558
1078	NCS1_KAN358-9_5.tif:0007-0150	1.08	5.049	0	50	4.899	15.458	0.852	5.451	520	1.433	0.698	0.904	0.0435488
1079	NCS1_KAN358-9_5.tif:0008-0205	0.88	311.5	4	1062	54.662	21.031	0.985	274.268	26166	1.121	0.892	0.971	2.19134
1080	NCS1_KAN358-9_5.tif:0009-0268	0.839	8.812	0	53	45.634	27.505	0.784	7.39	705	1.756	0.57	0.847	0.0590421
1081	NCS1_KAN358-9_5.tif:0010-0392	0.996	9.042	0	45	97.173	40.169	0.741	9.004	859	1.168	0.856	0.852	0.0719392
1082	NCS1_KAN358-9_5.tif:0011-0419	1.153	15.364	0	117	45.281	42.969	0.91	17.714	1690	1.368	0.731	0.94	0.141534
1083	NCS1_KAN358-9_5.tif:0012-0427	0.922	19.307	0	130	128.392	43.695	0.935	17.809	1699	1.115	0.897	0.921	0.142287
1084	NCS1_KAN358-9_5.tif:0013-0534	0.901	290.965	11	1872	121.45	54.693	0.691	262.288	25023	1.94	0.516	0.808	2.09562
1085	NCS1_KAN358-9_5.tif:0014-0542	0.88	32.75	0	258	88.935	55.467	0.893	28.836	2751	1.407	0.711	0.908	0.23039
1086	NCS1_KAN358-9_5.tif:0015-0558	1.289	8.813	0	51	7.169	57.21	0.818	11.362	1084	1.231	0.812	0.869	0.0907825
1087	NCS1_KAN358-9_5.tif:0016-0617	0.964	21.957	0	132	57.387	63.186	0.902	21.173	2020	1.488	0.672	0.92	0.16917
1088	NCS1_KAN358-9_5.tif:0017-0654	1.132	14.278	0	70	135.765	66.915	0.967	16.163	1542	1.039	0.962	0.915	0.129139
1089	NCS1_KAN358-9_5.tif:0018-0681	0.964	3.283	0	17	80.251	69.731	0.902	3.166	302	1.215	0.823	0.898	0.0252918
1090	NCS1_KAN358-9_5.tif:0019-0838	1.509	43.035	0	416	32.839	85.817	0.784	64.956	6197	1.544	0.648	0.867	0.518984
1091	NCS1_KAN358-9_5.tif:0020-0871	1.457	8.424	0	92	128.284	89.19	0.925	12.274	1171	1.297	0.771	0.917	0.0980685
1092	NCS1_KAN358-9_5.tif:0021-0912	1.174	7.625	0	42	72.016	93.457	0.893	8.952	854	1.098	0.911	0.878	0.0715205
1093	NCS1_KAN358-9_5.tif:0022-0991	1.279	19.566	0	117	106.621	101.486	0.985	25.02	2387	1.061	0.942	0.938	0.199906
1094	NCS1_KAN358-9_6.tif:0001-0007	1.059	346.554	12	2175	102.392	0.673	0.929	366.886	35002	1.193	0.838	0.944	2.93134
1095	NCS1_KAN358-9_6.tif:0002-0014	1.069	364.931	0	1522	122.522	1.423	0.968	390.166	37223	1.261	0.793	0.94	3.11734
1096	NCS1_KAN358-9_6.tif:0003-0046	0.954	26.209	0	116	82.01	4.751	1	24.999	2385	1.078	0.927	0.933	0.199738
1097	NCS1_KAN358-9_6.tif:0004-0093	1.048	26.63	0	187	137.045	9.511	0.937	27.913	2663	1.125	0.889	0.905	0.22302
1098	NCS1_KAN358-9_6.tif:0005-0142	0.933	11.337	0	93	26.306	14.534	0.959	10.576	1009	1.07	0.934	0.952	0.0845014
1099	NCS1_KAN358-9_6.tif:0006-0184	1.048	5.72	0	33	118.337	18.844	0.962	5.996	572	1.123	0.891	0.971	0.0479037
1100	NCS1_KAN358-9_6.tif:0007-0211	0.86	184.61	0	435	92.27	21.649	0.8	158.674	15138	1.973	0.507	0.948	1.26777
1101	NCS1_KAN358-9_6.tif:0008-0223	1.101	6.581	0	75	41.355	22.898	0.896	7.243	691	1.207	0.829	0.913	0.0578696
1102	NCS1_KAN358-9_6.tif:0009-0290	1.258	62.025	0	408	105.642	29.773	0.925	78.016	7443	1.236	0.809	0.938	0.623334
1103	NCS1_KAN358-9_6.tif:0010-0411	1.499	53.706	0	516	41.227	42.097	0.818	80.501	7680	1.657	0.603	0.885	0.643182
1104	NCS1_KAN358-9_6.tif:0011-0428	0.964	54.891	0	302	127.509	43.878	0.846	52.933	5050	1.038	0.963	0.889	0.422926
1105	NCS1_KAN358-9_6.tif:0012-0457	1.352	10.186	0	72	130.035	46.826	0.907	13.773	1314	1.093	0.915	0.899	0.110044
1106	NCS1_KAN358-9_6.tif:0013-0464	1.069	7.284	0	71	64.296	47.526	0.926	7.788	743	1.42	0.704	0.923	0.0622245
1107	NCS1_KAN358-9_6.tif:0014-0465	0.922	292.432	0	1377	77.163	47.683	0.949	269.74	25734	1.233	0.811	0.957	2.15516
1108	NCS1_KAN358-9_6.tif:0015-0490	1.006	266.031	18	1016	95.866	50.136	0.924	267.696	25539	1.247	0.802	0.95	2.13883
1109	NCS1_KAN358-9_6.tif:0016-0511	1.342	6.133	0	50	15.827	52.298	0.885	8.228	785	1.274	0.785	0.918	0.0657419
1110	NCS1_KAN358-9_6.tif:0017-0564	1.593	211.454	27	435	44.948	57.767	0.681	336.897	32141	2.507	0.399	0.913	2.69173
1111	NCS1_KAN358-9_6.tif:0018-0589	1.279	7.23	0	43	104.063	60.398	0.929	9.245	882	1.091	0.917	0.917	0.0738654
1112	NCS1_KAN358-9_6.tif:0019-0689	1.006	20.604	0	170	35.049	70.55	0.883	20.733	1978	1.305	0.766	0.91	0.165653
1113	NCS1_KAN358-9_6.tif:0020-0747	1.027	5.5	0	40	68.847	76.521	0.961	5.65	539	1.022	0.979	0.929	0.04514
1114	NCS1_KAN358-9_6.tif:0021-0846	0.86	410.537	0	1815	10.126	86.648	0.997	352.861	33664	1.131	0.884	0.965	2.81928
1115	NCS1_KAN358-9_6.tif:0022-0882	1.048	15.15	0	74	33.097	90.354	0.919	15.88	1515	1.447	0.691	0.948	0.126878
1116	NCS1_KAN358-9_6.tif:0023-0920	1.143	11.936	0	89	138.29	94.196	0.93	13.637	1301	1.221	0.819	0.936	0.108956
1117	NCS1_KAN358-9_6.tif:0024-0958	1.195	7.877	0	54	110.133	98.109	0.878	9.413	898	1.249	0.801	0.912	0.0752054
1118	NCS1_KAN358-9_6.tif:0025-0988	1.247	13.176	0	71	24.026	101.148	0.961	16.436	1568	1.191	0.84	0.919	0.131316
1119	NCS1_KAN358-9_6.tif:0026-0992	1.143	20.679	0	144	80.455	101.499	0.976	23.626	2254	1.061	0.943	0.928	0.188767
										6826.13				0.571673
														0
														0
														0
														0
1	NCS1_KAN358-10_1.tif:0001-0142	1.048	10.45	0	42	136.458	14.587	0.907	10.954	1045	1.416	0.706	0.905	0.0875163
2	NCS1_KAN358-10_1.tif:0002-0153	1.268	14.149	0	68	86.089	15.678	0.948	17.945	1712	1.125	0.889	0.917	0.143376
3	NCS1_KAN358-10_1.tif:0003-0175	0.943	14.522	0	58	60.445	17.895	0.99	13.7	1307	1.103	0.906	0.928	0.109458
4	NCS1_KAN358-10_1.tif:0004-0252	1.226	5.974	0	43	108.101	25.822	0.985	7.327	699	1.026	0.975	0.932	0.0585396
5	NCS1_KAN358-10_1.tif:0005-0351	0.849	22.444	0	146	46.358	36.019	0.904	19.056	1818	1.286	0.778	0.926	0.152253
6	NCS1_KAN358-10_1.tif:0006-0520	1.048	11.97	0	53	92.083	53.226	0.919	12.547	1197	1.186	0.843	0.93	0.100246
7	NCS1_KAN358-10_1.tif:0007-0561	1.111	19.491	0	88	124.643	57.458	0.92	21.656	2066	1.02	0.981	0.902	0.173023
8	NCS1_KAN358-10_1.tif:0008-0564	0.839	21.637	0	200	62.565	57.738	0.959	18.144	1731	1.047	0.955	0.92	0.144967
9	NCS1_KAN358-10_1.tif:0009-0604	1.017	11.175	0	95	35.042	61.895	0.964	11.362	1084	1.096	0.913	0.946	0.0907825
10	NCS1_KAN358-10_1.tif:0010-0708	1.184	45.504	0	423	106.074	72.469	0.896	53.898	5142	1.42	0.704	0.919	0.43063
11	NCS1_KAN358-10_1.tif:0011-0716	1.163	12.108	0	69	85.019	73.234	0.907	14.088	1344	1.12	0.893	0.91	0.112557
12	NCS1_KAN358-10_1.tif:0012-0929	1.646	25.229	0	163	130.157	95.307	0.762	41.519	3961	1.53	0.654	0.887	0.331724
13	NCS1_KAN358-10_1.tif:0013-0933	0.985	41.106	0	286	68.147	95.6	0.922	40.502	3864	1.022	0.978	0.908	0.323601
14	NCS1_KAN358-10_1.tif:0014-0943	0.849	3.086	0	15	17.689	96.513	0.917	2.62	250	1.14	0.877	0.953	0.0209369
15	NCS1_KAN358-10_2.tif:0001-0006	1.184	6.929	0	60	122.858	0.651	0.881	8.207	783	1.55	0.645	0.958	0.0655744
16	NCS1_KAN358-10_2.tif:0002-0028	0.975	3.366	0	25	29.823	2.877	0.975	3.281	313	1.237	0.809	0.912	0.026213
17	NCS1_KAN358-10_2.tif:0003-0180	1.3	22.484	0	177	85.822	18.496	0.872	29.223	2788	1.135	0.881	0.899	0.233488
18	NCS1_KAN358-10_2.tif:0004-0220	1.195	32.404	0	203	116.73	22.604	0.92	38.72	3694	1.332	0.751	0.894	0.309364
19	NCS1_KAN358-10_2.tif:0005-0221	0.943	6.667	0	38	40.348	22.618	0.882	6.289	600	1.291	0.774	0.882	0.0502486
20	NCS1_KAN358-10_2.tif:0006-0223	0.985	8.638	0	60	59.406	22.857	0.985	8.511	812	1.045	0.957	0.922	0.0680031
21	NCS1_KAN358-10_2.tif:0007-0264	0.839	330.188	0	1729	103.72	27.09	0.85	276.878	26415	1.753	0.571	0.899	2.21219
22	NCS1_KAN358-10_2.tif:0008-0279	0.87	28.422	0	178	124.012	28.58	0.853	24.727	2359	1.198	0.835	0.907	0.197561
23	NCS1_KAN358-10_2.tif:0009-0281	0.849	5.951	0	59	0.787	28.753	0.904	5.052	482	1.057	0.946	0.915	0.0403664
24	NCS1_KAN358-10_2.tif:0010-0383	0.985	31.33	0	324	42.091	39.272	0.966	30.869	2945	1.198	0.835	0.94	0.246637
25	NCS1_KAN358-10_2.tif:0011-0451	0.996	22.674	0	99	28.296	46.2	0.963	22.578	2154	1.04	0.961	0.922	0.180392
26	NCS1_KAN358-10_2.tif:0012-0497	1.048	12.11	0	57	90.618	50.937	0.967	12.694	1211	1.153	0.867	0.913	0.101418
27	NCS1_KAN358-10_2.tif:0013-0539	1.163	16.171	0	105	124.489	55.163	0.947	18.815	1795	1.207	0.828	0.945	0.150327
28	NCS1_KAN358-10_2.tif:0014-0609	0.86	26.963	0	144	72.859	62.416	0.948	23.175	2211	1.24	0.806	0.927	0.185166
29	NCS1_KAN358-10_2.tif:0015-0750	0.954	5.67	0	60	22.564	76.782	0.922	5.409	516	1.206	0.829	0.897	0.0432138
30	NCS1_KAN358-10_2.tif:0016-0768	1.059	11.545	0	85	59.942	78.659	0.929	12.222	1166	1.169	0.856	0.944	0.0976498
31	NCS1_KAN358-10_2.tif:0017-0838	0.943	7.211	0	33	14.779	85.78	0.99	6.803	649	1.201	0.833	0.933	0.0543522
32	NCS1_KAN358-10_2.tif:0018-0851	1.279	3.943	0	18	135	87.13	0.903	5.042	481	1.276	0.784	0.914	0.0402826
33	NCS1_KAN358-10_2.tif:0019-0886	1.069	26.118	0	160	82.864	90.761	0.881	27.924	2664	1.524	0.656	0.949	0.223104
34	NCS1_KAN358-10_3.tif:0001-0039	0.87	18.578	0	121	81.115	4.013	0.853	16.163	1542	1.583	0.632	0.897	0.129139
35	NCS1_KAN358-10_3.tif:0002-0112	0.901	10.895	0	120	51.31	11.52	0.914	9.822	937	1.384	0.723	0.91	0.0784716
36	NCS1_KAN358-10_3.tif:0003-0193	0.943	5.411	0	62	21.929	19.742	0.97	5.105	487	1.06	0.943	0.963	0.0407851
37	NCS1_KAN358-10_3.tif:0004-0383	0.912	28.966	0	156	68.107	39.25	0.957	26.414	2520	1.12	0.892	0.921	0.211044
38	NCS1_KAN358-10_3.tif:0005-0402	0.964	15.033	0	72	85.968	41.219	0.978	14.496	1383	1.222	0.818	0.934	0.115823
39	NCS1_KAN358-10_3.tif:0006-0410	1.184	15.558	0	101	124.999	41.946	0.896	18.427	1758	1.455	0.687	0.93	0.147228
40	NCS1_KAN358-10_3.tif:0007-0427	0.912	5.023	0	22	101.309	43.806	0.971	4.581	437	1.214	0.823	0.946	0.0365977
41	NCS1_KAN358-10_3.tif:0008-0564	1.048	5.4	0	36	30.988	57.768	0.937	5.66	540	1.114	0.898	0.905	0.0452237
42	NCS1_KAN358-10_3.tif:0009-0566	0.922	5.307	0	46	9.592	57.958	0.784	4.895	467	1.711	0.585	0.889	0.0391102
43	NCS1_KAN358-10_3.tif:0010-0670	1.163	10.126	0	65	141.412	68.527	0.855	11.782	1124	1.376	0.727	0.914	0.0941324
44	NCS1_KAN358-10_3.tif:0011-0743	1.069	5.686	0	60	51.363	76.035	0.926	6.079	580	1.425	0.702	0.915	0.0485736
45	NCS1_KAN358-10_3.tif:0012-0824	1.226	9.479	0	58	135.765	84.418	0.956	11.624	1109	1.189	0.841	0.936	0.0928762
46	NCS1_KAN358-10_3.tif:0013-0863	0.985	18.277	0	97	75.161	88.415	0.864	18.008	1718	1.575	0.635	0.926	0.143878
47	NCS1_KAN358-10_3.tif:0014-0915	1.059	13.485	0	87	92.297	93.669	0.917	14.276	1362	1.15	0.87	0.91	0.114064
48	NCS1_KAN358-10_3.tif:0015-0923	1.289	21.854	0	103	78.467	94.514	0.874	28.175	2688	1.338	0.748	0.888	0.225114
49	NCS1_KAN358-10_3.tif:0016-0953	1.237	27.907	0	144	111.506	97.633	0.898	34.517	3293	1.383	0.723	0.897	0.275781
50	NCS1_KAN358-10_3.tif:0017-1002	0.985	12.043	0	59	33.817	102.638	0.934	11.865	1132	1.294	0.773	0.94	0.0948024
51	NCS1_KAN358-10_3.tif:0018-1025	1.426	27.14	0	166	103.998	104.997	0.798	38.689	3691	1.326	0.754	0.863	0.309113
52	NCS1_KAN358-10_4.tif:0001-0110	0.87	6.096	0	45	94.249	11.245	0.94	5.304	506	1.088	0.919	0.96	0.0423763
53	NCS1_KAN358-10_4.tif:0002-0266	1.258	12.583	0	100	141.474	27.266	0.877	15.828	1510	1.266	0.79	0.886	0.126459
54	NCS1_KAN358-10_4.tif:0003-0286	0.86	18.256	0	99	46.917	29.256	0.948	15.691	1497	1.056	0.947	0.921	0.12537
55	NCS1_KAN358-10_4.tif:0004-0384	1.027	9.571	0	72	22.871	39.367	0.836	9.832	938	1.741	0.574	0.912	0.0785553
56	NCS1_KAN358-10_4.tif:0005-0496	1.195	14.193	0	96	81.578	50.761	0.916	16.96	1618	1.383	0.723	0.946	0.135504
57	NCS1_KAN358-10_4.tif:0006-0640	1.195	8.482	0	57	9.465	65.58	0.904	10.136	967	1.565	0.639	0.938	0.080984
58	NCS1_KAN358-10_4.tif:0007-0667	1.174	48.277	0	171	117.954	68.312	0.955	56.675	5407	1.326	0.754	0.945	0.452824
59	NCS1_KAN358-10_4.tif:0008-0669	1.101	22.4	0	106	35.827	68.563	0.953	24.653	2352	1.329	0.752	0.929	0.196974
60	NCS1_KAN358-10_4.tif:0009-0717	1.08	10.699	0	55	97.026	73.431	0.906	11.551	1102	1.267	0.789	0.916	0.0922899
61	NCS1_KAN358-10_4.tif:0010-0761	0.849	227.63	5	550	126.504	77.933	0.936	193.265	18438	1.297	0.771	0.92	1.54414
62	NCS1_KAN358-10_4.tif:0011-0793	0.964	32.185	0	225	36.424	81.185	0.885	31.037	2961	1.205	0.83	0.915	0.247977
63	NCS1_KAN358-10_4.tif:0012-0795	1.059	16.663	0	70	78.272	81.48	0.959	17.641	1683	1.192	0.839	0.935	0.140947
64	NCS1_KAN358-10_4.tif:0013-0948	1.153	14.327	0	98	25.924	97.028	0.814	16.519	1576	1.621	0.617	0.909	0.131986
65	NCS1_KAN358-10_4.tif:0014-0971	1.237	77.831	0	522	102.821	99.431	0.873	96.265	9184	1.326	0.754	0.915	0.769139
66	NCS1_KAN358-10_5.tif:0001-0103	0.891	6.4	0	35	40.764	10.613	0.935	5.702	544	1.066	0.938	0.909	0.0455587
67	NCS1_KAN358-10_5.tif:0002-0191	0.996	6.737	0	40	92.993	19.562	0.944	6.708	640	1.136	0.88	0.945	0.0535985
68	NCS1_KAN358-10_5.tif:0003-0200	1.08	105.233	0	392	106.191	20.569	0.75	113.613	10839	1.903	0.526	0.88	0.907741
69	NCS1_KAN358-10_5.tif:0004-0285	1.258	20.758	0	160	119.709	29.231	0.957	26.11	2491	1.096	0.913	0.909	0.208615
70	NCS1_KAN358-10_5.tif:0005-0557	1.153	27.955	0	219	116.29	56.996	0.862	32.232	3075	1.127	0.887	0.873	0.257524
71	NCS1_KAN358-10_5.tif:0006-0583	0.985	28.979	0	158	90.594	59.771	0.837	28.553	2724	1.466	0.682	0.917	0.228129
72	NCS1_KAN358-10_5.tif:0007-0627	1.048	66.46	0	389	34.518	64.187	0.919	69.662	6646	1.34	0.746	0.939	0.556587
73	NCS1_KAN358-10_5.tif:0008-0743	1.006	12.854	0	96	53.444	76.048	0.929	12.935	1234	1.108	0.903	0.897	0.103345
74	NCS1_KAN358-10_5.tif:0009-0804	1.247	51.395	0	293	108.4	82.295	0.917	64.107	6116	1.379	0.725	0.937	0.512201
75	NCS1_KAN358-10_5.tif:0010-0825	1.216	49.526	0	325	141.039	84.49	0.858	60.218	5745	1.368	0.731	0.899	0.48113
76	NCS1_KAN358-10_5.tif:0011-0950	0.86	9.683	0	36	35.183	97.334	0.948	8.323	794	1.313	0.762	0.921	0.0664956
77	NCS1_KAN358-10_5.tif:0012-1009	1.363	37.4	0	203	118.125	103.295	0.924	50.963	4862	1.356	0.737	0.915	0.407181
78	NCS1_KAN358-10_6.tif:0001-0091	0.849	5.123	0	29	98.319	9.321	0.95	4.35	415	1.351	0.74	0.964	0.0347553
79	NCS1_KAN358-10_6.tif:0002-0177	0.922	4.273	0	38	23.557	18.152	0.863	3.941	376	1.28	0.781	0.884	0.0314891
80	NCS1_KAN358-10_6.tif:0003-0189	0.86	7.622	0	36	57.881	19.37	0.997	6.551	625	1.134	0.881	0.959	0.0523423
81	NCS1_KAN358-10_6.tif:0004-0264	1.111	11.547	0	123	114.25	27.068	0.904	12.83	1224	1.358	0.737	0.926	0.102507
82	NCS1_KAN358-10_6.tif:0005-0404	1.059	20.713	0	132	86.184	41.412	0.959	21.928	2092	1.072	0.933	0.94	0.1752
83	NCS1_KAN358-10_6.tif:0006-0597	1.048	13.42	0	71	14.798	61.142	0.919	14.067	1342	1.229	0.814	0.93	0.112389
84	NCS1_KAN358-10_6.tif:0007-0647	1.111	12.462	0	65	56.295	66.205	0.932	13.847	1321	1.157	0.864	0.934	0.110631
85	NCS1_KAN358-10_6.tif:0008-0664	1.342	9.164	0	53	133.888	67.934	0.895	12.295	1173	1.125	0.889	0.941	0.098236
86	NCS1_KAN358-10_6.tif:0009-0683	1.143	343.55	0	1759	118.49	69.938	0.902	392.514	37447	1.307	0.765	0.928	3.1361
87	NCS1_KAN358-10_6.tif:0010-0703	1.069	32.843	0	129	104.421	72.013	0.938	35.114	3350	1.253	0.798	0.944	0.280555
88	NCS1_KAN358-10_6.tif:0011-0817	1.237	334.305	0	2231	52.391	83.657	0.696	413.488	39448	2.399	0.417	0.911	3.30368
89	NCS1_KAN358-10_6.tif:0012-0835	1.059	69.01	0	361	22.782	85.58	0.872	73.059	6970	1.501	0.666	0.935	0.583721
90	NCS1_KAN358-10_6.tif:0013-0844	1.143	18.862	0	84	94.689	86.438	0.959	21.551	2056	1.221	0.819	0.94	0.172185
91	NCS1_KAN358-10_6.tif:0014-0955	1.048	10.39	0	54	63.812	97.787	0.919	10.891	1039	1.252	0.799	0.93	0.0870138
92	NCS1_KAN358-10_6.tif:0015-1028	0.901	411.442	18	2070	90.386	105.248	0.994	370.89	35384	1.139	0.878	0.95	2.96333
										3844.36				0.321956
														0
														0
														0
														0
93	NCS1_KAN358-11_1.tif:0001-0069	1.048	2.47	0	13	107.992	7.101	0.949	2.589	247	1.066	0.938	0.935	0.0206857
94	NCS1_KAN358-11_1.tif:0002-0076	0.922	2.477	0	11	25.009	7.788	0.863	2.285	218	1.338	0.748	0.876	0.018257
95	NCS1_KAN358-11_1.tif:0003-0138	0.849	3.543	0	15	71.492	14.091	0.936	3.008	287	1.218	0.821	0.926	0.0240356
96	NCS1_KAN358-11_1.tif:0004-0231	0.985	2.819	0	10	10.128	23.651	0.827	2.778	265	1.59	0.629	0.887	0.0221931
97	NCS1_KAN358-11_1.tif:0005-0248	0.943	9.167	0	63	120.424	25.414	0.912	8.648	825	1.1	0.909	0.9	0.0690918
98	NCS1_KAN358-11_1.tif:0006-0273	1.017	2.505	0	13	40.856	27.968	0.853	2.547	243	1.163	0.86	0.898	0.0203507
99	NCS1_KAN358-11_1.tif:0007-0364	1.09	2.846	0	14	83.13	37.249	0.956	3.103	296	1.216	0.822	0.95	0.0247893
100	NCS1_KAN358-11_1.tif:0008-0593	1.027	3.357	0	23	41.695	60.767	0.93	3.449	329	1.038	0.963	0.925	0.027553
101	NCS1_KAN358-11_1.tif:0009-0607	1.038	2.515	0	12	99.102	62.238	0.91	2.61	249	1.202	0.832	0.943	0.0208532
102	NCS1_KAN358-11_1.tif:0010-0693	0.839	3.413	0	11	68.31	70.99	0.973	2.862	273	1.141	0.876	0.958	0.0228631
103	NCS1_KAN358-11_1.tif:0011-0815	1.08	2.35	0	13	23.198	83.442	0.947	2.537	242	1.038	0.963	0.949	0.0202669
104	NCS1_KAN358-11_1.tif:0012-0905	1.038	5.687	0	48	111.579	92.663	0.971	5.901	563	1.25	0.8	0.934	0.0471499
105	NCS1_KAN358-11_1.tif:0013-0957	1.08	2.709	0	11	50.013	98.019	0.918	2.924	279	1.45	0.689	0.954	0.0233656
106	NCS1_KAN358-11_2.tif:0001-0106	1.027	2.929	0	23	119.675	10.94	0.974	3.008	287	1.087	0.92	0.961	0.0240356
107	NCS1_KAN358-11_2.tif:0002-0289	0.964	3.88	0	43	136.628	29.643	0.978	3.742	357	1.077	0.929	0.939	0.0298979
108	NCS1_KAN358-11_2.tif:0003-0290	0.964	2.478	0	10	69.818	29.766	0.846	2.39	228	1.178	0.849	0.902	0.0190945
109	NCS1_KAN358-11_2.tif:0004-0348	0.922	2.591	0	12	39.247	35.644	0.935	2.39	228	1.108	0.902	0.926	0.0190945
110	NCS1_KAN358-11_2.tif:0005-0479	1.09	3.923	0	27	99.801	49.037	0.927	4.277	408	1.21	0.827	0.945	0.034169
111	NCS1_KAN358-11_2.tif:0006-0602	1.478	2.972	0	19	11.23	61.565	0.836	4.392	419	1.451	0.689	0.881	0.0350903
112	NCS1_KAN358-11_2.tif:0007-0606	0.933	2.798	0	12	50.395	62.08	0.915	2.61	249	1.104	0.906	0.918	0.0208532
113	NCS1_KAN358-11_2.tif:0008-0619	1.205	3.922	0	26	130.137	63.413	0.912	4.727	451	1.014	0.987	0.92	0.0377702
114	NCS1_KAN358-11_2.tif:0009-0720	1.048	2.27	0	13	76.193	73.674	0.949	2.379	227	1.213	0.825	0.939	0.0190107
115	NCS1_KAN358-11_2.tif:0010-0726	1.143	4.596	0	65	113.963	74.354	0.946	5.251	501	1.228	0.814	0.92	0.0419576
116	NCS1_KAN358-11_2.tif:0011-0857	1.143	3.963	0	22	100.66	87.751	0.918	4.528	432	1.251	0.799	0.905	0.036179
117	NCS1_KAN358-11_2.tif:0012-0862	1.122	1.888	0	10	19.47	88.286	0.929	2.117	202	1.246	0.803	0.915	0.016917
118	NCS1_KAN358-11_2.tif:0013-0921	0.86	2.329	0	15	67.243	94.352	0.962	2.002	191	1.096	0.913	0.959	0.0159958
119	NCS1_KAN358-11_2.tif:0014-0985	1.174	3.884	0	17	100.866	100.8	0.889	4.56	435	1.181	0.847	0.907	0.0364302
120	NCS1_KAN358-11_2.tif:0015-0999	0.86	5.049	0	29	31.4	102.259	0.902	4.339	414	1.254	0.797	0.896	0.0346715
121	NCS1_KAN358-11_3.tif:0001-0006	0.87	2.639	0	12	25.116	0.617	0.926	2.296	219	1.29	0.775	0.933	0.0183407
122	NCS1_KAN358-11_3.tif:0002-0102	1.174	2.58	0	12	85.11	10.457	0.806	3.029	289	1.457	0.686	0.889	0.0242031
123	NCS1_KAN358-11_3.tif:0003-0321	1.279	3.623	0	19	96.606	32.92	0.913	4.633	442	1.392	0.719	0.953	0.0370165
124	NCS1_KAN358-11_3.tif:0004-0323	0.975	1.989	0	10	0.737	33.063	0.943	1.939	185	1.228	0.815	0.916	0.0154933
125	NCS1_KAN358-11_3.tif:0005-0359	1.216	2.457	0	15	62.737	36.814	0.909	2.987	285	1.303	0.767	0.906	0.0238681
126	NCS1_KAN358-11_3.tif:0006-0396	1.132	3.667	0	20	116.984	40.515	0.95	4.151	396	1.331	0.751	0.943	0.0331641
127	NCS1_KAN358-11_3.tif:0007-0447	1.216	2.069	0	10	21.868	45.768	0.948	2.516	240	1.181	0.847	0.939	0.0200994
128	NCS1_KAN358-11_3.tif:0008-0556	0.87	2.325	0	10	44.102	56.961	0.865	2.023	193	1.25	0.8	0.922	0.0161633
129	NCS1_KAN358-11_3.tif:0009-0603	1.017	6.237	0	42	115.16	61.773	0.933	6.342	605	1.114	0.898	0.946	0.0506673
130	NCS1_KAN358-11_3.tif:0010-0666	0.954	2.088	0	11	46.856	68.216	0.967	1.992	190	1.112	0.899	0.929	0.0159121
131	NCS1_KAN358-11_3.tif:0011-0792	0.86	5.024	0	21	82.131	81.108	0.928	4.319	412	1.172	0.853	0.959	0.034504
132	NCS1_KAN358-11_3.tif:0012-0887	1.143	2.606	0	11	8.151	90.865	0.918	2.977	284	1.347	0.743	0.905	0.0237843
133	NCS1_KAN358-11_3.tif:0013-0920	1.08	3.291	0	13	135.86	94.235	0.935	3.553	339	1.239	0.807	0.924	0.0283905
134	NCS1_KAN358-11_3.tif:0014-1015	1.268	3.438	0	15	93.203	103.924	0.86	4.36	416	1.41	0.709	0.9	0.034839
135	NCS1_KAN358-11_4.tif:0001-0048	1.027	2.959	0	14	28.36	4.885	0.878	3.04	290	1.373	0.728	0.891	0.0242868
136	NCS1_KAN358-11_4.tif:0002-0220	0.901	2.477	0	12	1.188	22.531	0.946	2.233	213	1.188	0.841	0.905	0.0178383
137	NCS1_KAN358-11_4.tif:0003-0252	1.122	2.991	0	22	104.128	25.794	0.984	3.354	320	1.193	0.838	0.955	0.0267993
138	NCS1_KAN358-11_4.tif:0004-0295	1.174	2.884	0	15	136.312	30.196	0.955	3.386	323	1.148	0.871	0.941	0.0270505
139	NCS1_KAN358-11_4.tif:0005-0313	1.111	4.726	0	53	57.982	32.093	0.893	5.251	501	1.137	0.879	0.922	0.0419576
140	NCS1_KAN358-11_4.tif:0006-0320	1.09	2.548	0	11	77.934	32.832	0.915	2.778	265	1.357	0.737	0.924	0.0221931
141	NCS1_KAN358-11_4.tif:0007-0466	1.153	2.764	0	14	85.724	47.787	0.926	3.186	304	1.242	0.805	0.909	0.0254593
142	NCS1_KAN358-11_4.tif:0008-0578	0.901	2.942	0	14	44.544	59.223	0.914	2.652	253	1.259	0.795	0.915	0.0211882
143	NCS1_KAN358-11_4.tif:0009-0580	1.153	3.445	0	29	14.931	59.452	0.926	3.973	379	1.314	0.761	0.905	0.0317404
144	NCS1_KAN358-11_4.tif:0010-0645	1.226	3.872	0	61	119.87	66.121	0.787	4.748	453	1.563	0.64	0.886	0.0379377
145	NCS1_KAN358-11_4.tif:0011-0769	1.279	2.59	0	15	58.564	78.74	0.929	3.312	316	1.21	0.826	0.917	0.0264643
146	NCS1_KAN358-11_4.tif:0012-0845	1.09	4.067	0	28	46.282	86.569	0.944	4.434	423	1.049	0.953	0.912	0.0354253
147	NCS1_KAN358-11_4.tif:0013-0867	1.017	2.969	0	15	25.406	88.792	0.983	3.019	288	1.089	0.918	0.928	0.0241193
148	NCS1_KAN358-11_4.tif:0014-0885	1.122	2.402	0	10	86.599	90.627	0.924	2.694	257	1.162	0.861	0.955	0.0215231
149	NCS1_KAN358-11_4.tif:0015-0916	0.954	2.352	0	10	1.715	93.824	1	2.243	214	1.109	0.902	0.933	0.017922
150	NCS1_KAN358-11_4.tif:0016-0940	1.247	3.672	0	23	130.451	96.188	0.973	4.581	437	1.095	0.914	0.948	0.0365977
151	NCS1_KAN358-11_5.tif:0001-0169	0.964	2.065	0	10	26.886	17.374	0.978	1.992	190	1.116	0.896	0.934	0.0159121
152	NCS1_KAN358-11_5.tif:0002-0192	0.849	2.58	0	11	83.445	19.662	0.971	2.191	209	1.195	0.837	0.915	0.0175033
153	NCS1_KAN358-11_5.tif:0003-0214	1.017	6.247	0	51	112.572	21.953	0.921	6.352	606	1.451	0.689	0.937	0.0507511
154	NCS1_KAN358-11_5.tif:0004-0326	1.31	2.048	0	13	58.911	33.45	0.819	2.683	256	1.08	0.926	0.874	0.0214394
155	NCS1_KAN358-11_5.tif:0005-0331	1.006	2	0	11	5.614	33.945	0.883	2.013	192	1.432	0.698	0.923	0.0160796
156	NCS1_KAN358-11_5.tif:0006-0377	0.985	2.862	0	13	134.329	38.676	0.922	2.82	269	1.139	0.878	0.926	0.0225281
157	NCS1_KAN358-11_5.tif:0007-0495	1.572	3.907	0	29	98.249	50.679	0.786	6.142	586	1.777	0.563	0.917	0.0490761
158	NCS1_KAN358-11_5.tif:0008-0620	0.996	3.053	0	13	44.909	63.456	1	3.04	290	1.113	0.899	0.95	0.0242868
159	NCS1_KAN358-11_5.tif:0009-0638	1.499	3.678	0	17	115.465	65.36	0.893	5.513	526	1.269	0.788	0.905	0.0440513
160	NCS1_KAN358-11_5.tif:0010-0650	1.038	3.182	0	15	16.121	66.568	0.99	3.302	315	1.089	0.919	0.917	0.0263805
161	NCS1_KAN358-11_5.tif:0011-0761	1.027	2.398	0	28	2.538	77.945	0.862	2.463	235	1.347	0.742	0.887	0.0196807
162	NCS1_KAN358-11_5.tif:0012-0899	1.111	2.547	0	11	71.304	92.033	0.882	2.83	270	1.313	0.762	0.876	0.0226119
163	NCS1_KAN358-11_5.tif:0013-0962	1.143	4.624	0	19	117.537	98.478	0.942	5.283	504	1.192	0.839	0.96	0.0422088
164	NCS1_KAN358-11_5.tif:0014-0982	1.143	3.037	0	17	140.359	100.535	0.891	3.469	331	1.048	0.954	0.912	0.0277205
165	NCS1_KAN358-11_6.tif:0001-0019	0.849	3.148	0	22	136.474	1.926	0.971	2.673	255	1.066	0.938	0.92	0.0213557
166	NCS1_KAN358-11_6.tif:0002-0140	1.08	2.485	0	17	12.265	14.334	0.947	2.683	256	1.168	0.856	0.941	0.0214394
167	NCS1_KAN358-11_6.tif:0003-0188	1.163	2.216	0	11	1.147	19.22	0.866	2.579	246	1.433	0.698	0.933	0.0206019
168	NCS1_KAN358-11_6.tif:0004-0227	1.143	2.294	0	11	58.515	23.35	0.891	2.62	250	1.349	0.741	0.905	0.0209369
169	NCS1_KAN358-11_6.tif:0005-0248	1.321	2.437	0	14	126.557	25.46	0.943	3.218	307	1.195	0.836	0.955	0.0257105
170	NCS1_KAN358-11_6.tif:0006-0381	1.153	2.618	0	13	106.575	39.008	0.848	3.019	288	1.212	0.825	0.891	0.0241193
171	NCS1_KAN358-11_6.tif:0007-0423	1.153	2.491	0	13	52.85	43.275	0.873	2.872	274	1.124	0.89	0.902	0.0229469
172	NCS1_KAN358-11_6.tif:0008-0487	1.163	2.721	0	15	30.966	49.829	0.976	3.166	302	1.117	0.896	0.945	0.0252918
173	NCS1_KAN358-11_6.tif:0009-0493	1.352	3.589	0	19	140.504	50.531	0.892	4.853	463	1.431	0.699	0.918	0.0387752
174	NCS1_KAN358-11_6.tif:0010-0624	1.132	6.759	0	53	105.799	63.96	0.921	7.652	730	1.37	0.73	0.939	0.0611358
175	NCS1_KAN358-11_6.tif:0011-0807	1.059	3.792	0	32	42.349	82.691	0.929	4.015	383	1.427	0.701	0.94	0.0320754
176	NCS1_KAN358-11_6.tif:0012-0840	1.132	3.204	0	16	85.39	86.027	0.95	3.627	346	1.127	0.887	0.931	0.0289767
177	NCS1_KAN358-11_6.tif:0013-0885	1.069	2.706	0	11	26.631	90.606	0.886	2.893	276	1.283	0.78	0.895	0.0231144
178	NCS1_KAN358-11_6.tif:0014-0885	1.006	3.875	0	33	128.417	90.588	0.941	3.899	372	1.166	0.857	0.928	0.0311541
179	NCS1_KAN358-11_6.tif:0015-0904	0.964	2.663	0	13	53.525	92.567	0.932	2.568	245	1.154	0.866	0.915	0.0205182
										331.586				0.0277696
180	NCS1_KAN358-12_1.tif:0001-0015	1.027	67.969	0	412	72.809	1.499	0.797	69.82	6661	1.871	0.534	0.938	0.557843
181	NCS1_KAN358-12_1.tif:0002-0133	1.3	64.194	0	424	98.557	13.653	0.762	83.436	7960	1.72	0.581	0.873	0.666631
182	NCS1_KAN358-12_1.tif:0003-0188	1.31	64.664	0	601	76.434	19.269	0.841	84.725	8083	1.628	0.614	0.919	0.676932
183	NCS1_KAN358-12_1.tif:0004-0334	0.912	23.828	0	173	31.536	34.169	0.912	21.729	2073	1.201	0.833	0.892	0.173609
184	NCS1_KAN358-12_1.tif:0005-0371	1.719	113.921	0	961	101.037	37.957	0.691	195.833	18683	1.55	0.645	0.837	1.56466
185	NCS1_KAN358-12_1.tif:0006-0375	0.933	63.831	0	319	110.334	38.408	0.946	59.547	5681	1.179	0.848	0.932	0.47577
186	NCS1_KAN358-12_1.tif:0007-0413	1.436	95.036	0	595	124.427	42.202	0.746	136.474	13020	1.663	0.601	0.846	1.09039
187	NCS1_KAN358-12_1.tif:0008-0459	1.342	61.492	0	480	58.986	47.054	0.895	82.503	7871	1.35	0.741	0.931	0.659178
188	NCS1_KAN358-12_1.tif:0009-0554	1.31	72	0	444	116.602	56.774	0.864	94.337	9000	1.469	0.681	0.912	0.753729
189	NCS1_KAN358-12_1.tif:0010-0640	1.237	47.144	0	342	18.035	65.547	0.825	58.311	5563	1.875	0.533	0.922	0.465888
190	NCS1_KAN358-12_1.tif:0011-0685	1.488	109.585	0	742	138.322	70.13	0.812	163.108	15561	1.645	0.608	0.882	1.3032
191	NCS1_KAN358-12_1.tif:0012-0719	1.08	103.757	0	561	93.249	73.68	0.894	112.02	10687	1.212	0.825	0.884	0.895011
192	NCS1_KAN358-12_1.tif:0013-0805	1.048	18.92	0	292	55.335	82.377	0.817	19.832	1892	1.22	0.82	0.858	0.158451
193	NCS1_KAN358-12_1.tif:0014-0806	1.415	80.356	0	693	114.338	82.609	0.809	113.707	10848	1.183	0.845	0.894	0.908495
194	NCS1_KAN358-12_1.tif:0015-0841	1.488	89.465	0	582	133.712	86.222	0.762	133.162	12704	1.523	0.656	0.869	1.06393
195	NCS1_KAN358-12_1.tif:0016-0922	0.88	106.69	0	508	79.814	94.459	0.906	93.938	8962	1.483	0.674	0.944	0.750547
196	NCS1_KAN358-12_2.tif:0001-0113	1.048	109.24	0	555	92.103	11.58	0.853	114.504	10924	1.263	0.792	0.885	0.914859
197	NCS1_KAN358-12_2.tif:0002-0249	1.174	77.625	0	487	24.089	25.469	0.838	91.129	8694	1.407	0.711	0.914	0.728102
198	NCS1_KAN358-12_2.tif:0003-0254	1.122	98.075	0	723	109.617	26.016	0.941	109.997	10494	1.047	0.955	0.915	0.878848
199	NCS1_KAN358-12_2.tif:0004-0306	1.384	99.076	0	686	79.792	31.297	0.791	137.082	13078	1.743	0.574	0.892	1.09525
200	NCS1_KAN358-12_2.tif:0005-0393	1.289	123.569	0	763	70.616	40.21	0.976	159.314	15199	1.045	0.957	0.946	1.27288
201	NCS1_KAN358-12_2.tif:0006-0431	1.038	100.869	0	599	46.451	44.147	0.91	104.672	9986	1.364	0.733	0.943	0.836304
202	NCS1_KAN358-12_2.tif:0007-0544	1.405	142.082	0	965	131.7	55.741	0.953	199.564	19039	1.32	0.757	0.94	1.59447
203	NCS1_KAN358-12_2.tif:0008-0607	1.268	107.802	0	767	26.916	62.148	0.86	136.725	13044	1.387	0.721	0.893	1.0924
204	NCS1_KAN358-12_2.tif:0009-0699	1.289	115.829	0	588	15.283	71.599	0.964	149.335	14247	1.102	0.907	0.925	1.19315
205	NCS1_KAN358-12_2.tif:0010-0711	1.205	123.757	0	841	97.141	72.786	0.94	149.178	14232	1.223	0.818	0.927	1.1919
206	NCS1_KAN358-12_2.tif:0011-0913	1.436	204.277	0	1397	126.723	93.438	0.947	293.345	27986	1.175	0.851	0.932	2.34376
207	NCS1_KAN358-12_2.tif:0012-0965	1.216	69.284	0	425	19.067	98.829	0.868	84.243	8037	1.129	0.886	0.906	0.67308
208	NCS1_KAN358-12_3.tif:0001-0017	0.839	28.062	0	152	37.621	1.729	0.973	23.532	2245	1.21	0.826	0.952	0.188013
209	NCS1_KAN358-12_3.tif:0002-0074	1.143	82.982	0	451	92.494	7.628	0.93	94.808	9045	1.187	0.843	0.94	0.757498
210	NCS1_KAN358-12_3.tif:0003-0206	0.891	37.941	0	139	59.013	21.112	0.916	33.804	3225	1.265	0.791	0.934	0.270086
211	NCS1_KAN358-12_3.tif:0004-0231	1.31	109.024	0	771	133.4	23.664	0.889	142.847	13628	1.351	0.74	0.912	1.14131
212	NCS1_KAN358-12_3.tif:0005-0235	1.184	73.628	0	474	27.253	23.994	0.846	87.209	8320	1.437	0.696	0.926	0.696781
213	NCS1_KAN358-12_3.tif:0006-0248	1.216	88.595	0	660	18.237	25.389	0.811	107.722	10277	1.555	0.643	0.917	0.860675
214	NCS1_KAN358-12_3.tif:0007-0287	1.184	111.522	0	488	107.882	29.43	0.952	132.092	12602	1.22	0.819	0.93	1.05539
215	NCS1_KAN358-12_3.tif:0008-0362	0.849	58.79	0	169	62.624	37.085	0.936	49.915	4762	1.219	0.821	0.926	0.398806
216	NCS1_KAN358-12_3.tif:0009-0431	1.205	120.348	0	733	71.681	44.241	0.851	145.069	13840	1.14	0.878	0.895	1.15907
217	NCS1_KAN358-12_3.tif:0010-0467	1.268	109.132	0	614	141.328	47.877	0.932	138.413	13205	1.292	0.774	0.938	1.10589
218	NCS1_KAN358-12_3.tif:0011-0515	1.101	99.619	0	441	33.041	52.741	0.924	109.64	10460	1.174	0.852	0.917	0.876001
219	NCS1_KAN358-12_3.tif:0012-0572	1.059	73.673	0	466	56.975	58.545	0.836	77.996	7441	1.427	0.701	0.91	0.623166
220	NCS1_KAN358-12_3.tif:0013-0629	1.467	160.514	0	1256	125.614	64.389	0.883	235.548	22472	1.328	0.753	0.918	1.88198
221	NCS1_KAN358-12_3.tif:0014-0833	1.247	139.798	0	831	69.615	85.337	0.917	174.376	16636	1.239	0.807	0.941	1.39323
222	NCS1_KAN358-12_3.tif:0015-0982	1.048	81.5	0	509	28.943	100.591	0.962	85.427	8150	1.103	0.907	0.962	0.682543
223	NCS1_KAN358-12_3.tif:0016-1017	1.268	55.496	0	493	56.279	104.139	0.744	70.386	6715	1.326	0.754	0.855	0.562366
224	NCS1_KAN358-12_4.tif:0001-0018	0.87	83.434	0	503	128.14	1.829	0.882	72.587	6925	1.239	0.807	0.878	0.579953
225	NCS1_KAN358-12_4.tif:0002-0052	0.849	47.296	0	234	67.458	5.322	0.861	40.156	3831	1.298	0.771	0.895	0.320837
226	NCS1_KAN358-12_4.tif:0003-0173	0.933	93.27	0	404	65.604	17.749	0.902	87.01	8301	1.077	0.929	0.886	0.695189
227	NCS1_KAN358-12_4.tif:0004-0180	1.352	92.248	0	662	124.842	18.423	0.902	124.734	11900	1.293	0.774	0.928	0.996597
228	NCS1_KAN358-12_4.tif:0005-0270	1.143	42.422	0	407	65.54	27.67	0.865	48.468	4624	1.489	0.672	0.916	0.387249
229	NCS1_KAN358-12_4.tif:0006-0290	1.101	101.486	0	450	14.148	29.721	0.896	111.695	10656	1.595	0.627	0.929	0.892415
230	NCS1_KAN358-12_4.tif:0007-0424	1.279	142.139	0	648	115.098	43.404	0.888	181.766	17341	1.109	0.902	0.931	1.45227
231	NCS1_KAN358-12_4.tif:0008-0516	1.059	84.782	0	530	4.054	52.838	0.9	89.756	8563	1.113	0.899	0.922	0.717131
232	NCS1_KAN358-12_4.tif:0009-0527	1.405	120.455	0	837	110.919	53.933	0.705	169.188	16141	1.48	0.676	0.815	1.35177
233	NCS1_KAN358-12_4.tif:0010-0587	1.289	80.382	0	576	90.217	60.146	0.726	103.634	9887	2.269	0.441	0.911	0.828013
234	NCS1_KAN358-12_4.tif:0011-0617	0.996	73.926	0	256	32.924	63.219	0.976	73.614	7023	1.329	0.752	0.955	0.58816
235	NCS1_KAN358-12_4.tif:0012-0638	1.132	116.713	0	537	73.162	65.292	0.867	132.124	12605	1.631	0.613	0.939	1.05564
236	NCS1_KAN358-12_4.tif:0013-0801	1.132	89.426	0	467	88.804	82.009	0.921	101.234	9658	1.385	0.722	0.923	0.808835
237	NCS1_KAN358-12_4.tif:0014-0875	1.321	70.016	0	511	71.247	89.611	0.881	92.471	8822	1.302	0.768	0.926	0.738822
238	NCS1_KAN358-12_4.tif:0015-0878	1.226	85.838	0	618	15.027	89.929	0.917	105.269	10043	1.179	0.848	0.914	0.841078
239	NCS1_KAN358-12_4.tif:0016-0928	0.996	83.6	0	484	45.023	95.008	0.914	83.247	7942	1.381	0.724	0.941	0.665124
240	NCS1_KAN358-12_5.tif:0001-0207	1.3	82.815	0	571	74.598	21.204	0.892	107.638	10269	1.478	0.676	0.932	0.860005
241	NCS1_KAN358-12_5.tif:0002-0223	1.331	123.102	0	761	101.766	22.859	0.903	163.873	15634	1.397	0.716	0.91	1.30931
242	NCS1_KAN358-12_5.tif:0003-0264	1.205	109.026	0	523	132.369	27.088	0.952	131.422	12538	1.217	0.822	0.947	1.05003
243	NCS1_KAN358-12_5.tif:0004-0329	1.677	127.05	0	874	112.92	33.765	0.784	213.075	20328	1.539	0.65	0.891	1.70242
244	NCS1_KAN358-12_5.tif:0005-0352	0.87	94	0	472	22.901	36.073	0.865	81.779	7802	1.306	0.766	0.922	0.653399
245	NCS1_KAN358-12_5.tif:0006-0496	1.436	102.905	0	772	138.416	50.812	0.672	147.773	14098	1.102	0.907	0.792	1.18067
246	NCS1_KAN358-12_5.tif:0007-0513	1.509	157.007	0	960	127.378	52.455	0.923	236.984	22609	1.236	0.809	0.917	1.89345
247	NCS1_KAN358-12_5.tif:0008-0531	1.216	137.31	0	511	79.228	54.335	0.894	166.955	15928	1.095	0.913	0.917	1.33393
248	NCS1_KAN358-12_5.tif:0009-0549	0.985	72.362	0	352	4.726	56.268	0.999	71.298	6802	1.113	0.899	0.949	0.569652
249	NCS1_KAN358-12_5.tif:0010-0558	1.247	89.378	0	646	51.134	57.172	0.906	111.485	10636	1.277	0.783	0.902	0.89074
250	NCS1_KAN358-12_5.tif:0011-0601	1.111	140.349	0	767	57.696	61.63	0.877	155.939	14877	1.514	0.66	0.934	1.24591
251	NCS1_KAN358-12_5.tif:0012-0826	1.143	108.706	0	500	85.287	84.654	0.865	124.2	11849	1.263	0.792	0.905	0.992326
252	NCS1_KAN358-12_5.tif:0013-0850	1.394	133.15	0	1063	104	87.025	0.871	185.623	17709	1.23	0.813	0.908	1.48309
253	NCS1_KAN358-12_5.tif:0014-0877	1.499	106.972	0	812	1.904	89.87	0.857	160.341	15297	1.15	0.87	0.899	1.28109
254	NCS1_KAN358-12_5.tif:0015-0989	1.226	162.932	0	562	122.385	101.298	0.956	199.816	19063	1.195	0.837	0.932	1.59648
255	NCS1_KAN358-12_5.tif:0016-0996	1.426	88.581	0	586	25.984	101.943	0.868	126.275	12047	1.324	0.755	0.916	1.00891
256	NCS1_KAN358-12_6.tif:0001-0040	1.237	84.347	0	455	116.234	4.164	0.936	104.326	9953	1.241	0.806	0.933	0.83354
257	NCS1_KAN358-12_6.tif:0002-0252	1.342	173.047	0	994	82.259	25.798	0.936	232.173	22150	1.26	0.793	0.921	1.85501
258	NCS1_KAN358-12_6.tif:0003-0288	1.331	147.094	0	993	100.474	29.539	0.841	195.812	18681	1.438	0.696	0.93	1.56449
259	NCS1_KAN358-12_6.tif:0004-0301	1.352	96.86	0	509	30.271	30.925	0.785	130.971	12495	1.923	0.52	0.89	1.04643
260	NCS1_KAN358-12_6.tif:0005-0412	1.237	97.492	0	459	139.82	42.183	0.859	120.583	11504	1.444	0.693	0.925	0.963433
261	NCS1_KAN358-12_6.tif:0006-0451	1.111	136.981	0	804	20.457	46.267	0.92	152.197	14520	1.388	0.721	0.91	1.21602
262	NCS1_KAN358-12_6.tif:0007-0472	0.849	49.235	0	242	85.834	48.359	0.985	41.802	3988	1.098	0.91	0.959	0.333986
263	NCS1_KAN358-12_6.tif:0008-0602	1.342	168.984	0	979	132.448	61.66	0.808	226.723	21630	1.493	0.67	0.877	1.81146
264	NCS1_KAN358-12_6.tif:0009-0618	1.143	108.349	0	672	42.503	63.235	0.84	123.791	11810	1.481	0.675	0.897	0.98906
265	NCS1_KAN358-12_6.tif:0010-0624	1.174	86.589	0	533	77.393	63.932	0.915	101.653	9698	1.4	0.714	0.937	0.812185
266	NCS1_KAN358-12_6.tif:0011-0652	1.509	126.264	0	796	16.951	66.826	0.863	190.581	18182	1.179	0.848	0.906	1.5227
267	NCS1_KAN358-12_6.tif:0012-0807	0.933	74.73	0	328	51.112	82.608	0.915	69.715	6651	1.206	0.829	0.913	0.557006
268	NCS1_KAN358-12_6.tif:0013-0826	1.384	151.417	0	1033	109.75	84.631	0.949	209.501	19987	1.078	0.927	0.936	1.67386
269	NCS1_KAN358-12_6.tif:0014-0888	0.964	87.12	0	460	67.591	90.903	0.846	84.012	8015	1.517	0.659	0.906	0.671237
270	NCS1_KAN358-12_6.tif:0015-1019	1.31	154.944	0	833	136.522	104.318	0.889	203.013	19368	1.053	0.95	0.906	1.62202
										11940.6				1

## Sheet: Replicate 2
	Label	Area	Mean	Min	Max	X	Y	Circ	IntDen	RawIntDen	AR	Round	Solidity
237	NCS1_KAN360-1_1.tif:0001-0106	1.027	3.112	0	26	82.217	10.843	0.889	3.197	305	1.572	0.636	0.912	0.0297232
238	NCS1_KAN360-1_1.tif:0002-0319	1.111	3.481	0	24	102.32	32.688	0.949	3.868	369	1.163	0.86	0.918	0.0359602
239	NCS1_KAN360-1_1.tif:0003-0369	0.996	3.537	0	26	65.867	37.787	0.836	3.522	336	1.681	0.595	0.905	0.0327442
240	NCS1_KAN360-1_1.tif:0004-0479	1.352	2.318	0	14	26.712	49.141	0.788	3.134	299	1.711	0.584	0.86	0.0291385
241	NCS1_KAN360-1_1.tif:0005-0533	0.985	2.372	0	10	49.435	54.541	0.985	2.337	223	1.209	0.827	0.926	0.021732
242	NCS1_KAN360-1_1.tif:0006-0612	1.258	3.658	0	16	134.082	62.727	0.877	4.602	439	1.19	0.84	0.889	0.0427819
243	NCS1_KAN360-1_1.tif:0007-0719	1.027	4.153	0	22	89.309	73.611	0.961	4.266	407	1.136	0.88	0.938	0.0396634
244	NCS1_KAN360-1_1.tif:0008-0805	0.849	1.951	0	10	15.377	82.425	0.936	1.656	158	1.062	0.942	0.915	0.0153976
245	NCS1_KAN360-1_1.tif:0009-0852	0.86	2.341	0	13	48.973	87.293	0.983	2.013	192	1.277	0.783	0.932	0.018711
246	NCS1_KAN360-1_1.tif:0010-0939	1.216	2.078	0	8	125.27	96.095	0.909	2.526	241	1.109	0.902	0.917	0.0234862
247	NCS1_KAN360-1_1.tif:0011-0954	0.891	6.847	0	69	95.388	97.701	0.886	6.1	582	1.13	0.885	0.929	0.0567177
248	NCS1_KAN360-1_1.tif:0012-0971	0.88	2.393	0	14	21.738	99.423	0.992	2.107	201	1.099	0.91	0.913	0.0195881
249	NCS1_KAN360-1_2.tif:0001-0066	0.964	2.413	0	24	97.411	6.773	0.978	2.327	222	1.15	0.869	0.934	0.0216346
250	NCS1_KAN360-1_2.tif:0002-0127	1.101	2.152	0	11	77.466	13.032	1	2.369	226	1.071	0.934	0.938	0.0220244
251	NCS1_KAN360-1_2.tif:0003-0139	0.839	2.125	0	14	16.861	14.257	0.939	1.782	170	1.129	0.886	0.952	0.016567
252	NCS1_KAN360-1_2.tif:0004-0198	0.88	2.762	0	15	47.817	20.287	0.906	2.432	232	1.482	0.675	0.939	0.0226091
253	NCS1_KAN360-1_2.tif:0005-0236	1.08	2.874	0	19	56.329	24.182	0.935	3.103	296	1.065	0.939	0.92	0.0288461
254	NCS1_KAN360-1_2.tif:0006-0246	0.849	4.099	0	20	39.229	25.18	0.904	3.48	332	1.414	0.707	0.931	0.0323544
255	NCS1_KAN360-1_2.tif:0007-0251	1.09	2.49	0	13	132.892	25.721	0.974	2.715	259	1.091	0.917	0.933	0.0252404
256	NCS1_KAN360-1_2.tif:0008-0308	0.964	2.272	0	10	4.557	31.605	0.964	2.191	209	1.339	0.747	0.915	0.0203677
257	NCS1_KAN360-1_2.tif:0009-0391	1.09	2.538	0	21	97.955	40.066	0.915	2.767	264	1.169	0.855	0.92	0.0257276
258	NCS1_KAN360-1_2.tif:0010-0500	1.132	1.963	0	9	52.667	51.15	0.91	2.222	212	1.201	0.833	0.896	0.0206601
259	NCS1_KAN360-1_2.tif:0011-0518	1.069	2.637	0	14	81.671	53	0.897	2.82	269	1.016	0.985	0.895	0.0262149
260	NCS1_KAN360-1_2.tif:0012-0540	0.975	2.312	0	11	139.042	55.259	0.956	2.254	215	1.072	0.933	0.939	0.0209524
261	NCS1_KAN360-1_2.tif:0013-0699	1.342	2.828	0	11	111.529	71.548	0.778	3.794	362	1.583	0.632	0.859	0.035278
262	NCS1_KAN360-1_2.tif:0014-0710	1.048	2.8	0	14	136.842	72.7	0.907	2.935	280	1.217	0.821	0.909	0.0272869
263	NCS1_KAN360-1_2.tif:0015-0759	1.017	2.402	0	9	73.485	77.689	0.909	2.442	233	1.112	0.899	0.882	0.0227066
264	NCS1_KAN360-1_2.tif:0016-0782	0.922	4.057	0	28	23.735	80.074	1	3.742	357	1.049	0.953	0.951	0.0347908
265	NCS1_KAN360-1_2.tif:0017-0852	1.038	3.061	0	16	111.734	87.286	0.971	3.176	303	1.069	0.935	0.925	0.0295283
266	NCS1_KAN360-1_2.tif:0018-0919	1.268	2.504	0	13	85.625	94.206	0.87	3.176	303	1.514	0.66	0.931	0.0295283
267	NCS1_KAN360-1_2.tif:0019-0934	0.943	2.6	0	12	16.797	95.691	0.957	2.453	234	1.116	0.896	0.928	0.022804
268	NCS1_KAN360-1_3.tif:0001-0014	1.132	3.111	0	17	137.913	1.495	0.95	3.522	336	1.306	0.766	0.931	0.0327442
269	NCS1_KAN360-1_3.tif:0002-0070	1.132	3.056	0	28	44.83	7.213	0.933	3.459	330	1.048	0.954	0.956	0.0321595
270	NCS1_KAN360-1_3.tif:0003-0182	1.09	2.702	0	13	111.818	18.635	0.944	2.945	281	1.132	0.883	0.92	0.0273843
271	NCS1_KAN360-1_3.tif:0004-0252	1.027	4.143	0	56	75.946	25.775	0.943	4.256	406	1.161	0.861	0.956	0.039566
272	NCS1_KAN360-1_3.tif:0005-0415	1.153	5.073	0	44	136.043	42.516	0.837	5.849	558	1.139	0.878	0.876	0.0543788
273	NCS1_KAN360-1_3.tif:0006-0493	1.038	3.03	0	17	59.403	50.5	0.871	3.145	300	1.307	0.765	0.904	0.0292359
274	NCS1_KAN360-1_3.tif:0007-0502	1.205	2.426	0	11	122.328	51.434	0.928	2.924	279	1.09	0.917	0.906	0.0271894
275	NCS1_KAN360-1_3.tif:0008-0560	1.132	2.333	0	11	32.512	57.371	0.846	2.641	252	1.502	0.666	0.885	0.0245582
276	NCS1_KAN360-1_3.tif:0009-0646	1.069	3.882	0	39	106.575	66.179	0.809	4.151	396	1.82	0.549	0.879	0.0385914
277	NCS1_KAN360-1_3.tif:0010-0765	1.038	2.636	0	14	124.494	78.275	0.91	2.736	261	1.257	0.796	0.93	0.0254353
278	NCS1_KAN360-1_3.tif:0011-0817	1.237	2.246	0	12	60.049	83.671	0.718	2.778	265	1.779	0.562	0.819	0.0258251
279	NCS1_KAN360-1_4.tif:0001-0121	1.163	4.144	0	47	79.431	12.441	0.947	4.822	460	1.116	0.896	0.941	0.0448284
280	NCS1_KAN360-1_4.tif:0002-0218	0.954	2.835	0	11	61.835	22.38	0.864	2.704	258	1.554	0.643	0.915	0.0251429
281	NCS1_KAN360-1_4.tif:0003-0369	0.901	2.407	0	12	30.613	37.776	0.96	2.17	207	1.049	0.954	0.94	0.0201728
282	NCS1_KAN360-1_4.tif:0004-0404	0.975	2.226	0	14	115.302	41.403	0.943	2.17	207	1.074	0.931	0.907	0.0201728
283	NCS1_KAN360-1_4.tif:0005-0435	0.943	2.767	0	13	15.305	44.574	0.882	2.61	249	1.421	0.704	0.905	0.0242658
284	NCS1_KAN360-1_4.tif:0006-0502	1.069	2.059	0	12	62.562	51.459	0.897	2.201	210	1.383	0.723	0.911	0.0204651
285	NCS1_KAN360-1_4.tif:0007-0716	0.912	2.425	0	10	76.963	73.349	0.894	2.212	211	1.321	0.757	0.906	0.0205626
286	NCS1_KAN360-1_4.tif:0008-0749	1.059	1.96	0	13	125.362	76.759	0.929	2.075	198	1.175	0.851	0.935	0.0192957
287	NCS1_KAN360-1_4.tif:0009-0789	0.849	4.321	0	31	54.012	80.874	0.873	3.669	350	1.281	0.781	0.91	0.0341086
288	NCS1_KAN360-1_4.tif:0010-0905	0.912	2.897	0	12	50.206	92.708	0.957	2.641	252	1.133	0.883	0.921	0.0245582
289	NCS1_KAN360-1_4.tif:0011-1012	0.964	2.152	0	10	119.714	103.581	0.914	2.075	198	1.126	0.888	0.925	0.0192957
290	NCS1_KAN360-1_4.tif:0012-1032	1.08	3.825	0	19	92.72	105.711	0.894	4.13	394	1.305	0.766	0.9	0.0383965
291	NCS1_KAN360-1_5.tif:0001-0094	0.943	2.878	0	12	133.077	9.632	0.925	2.715	259	1.253	0.798	0.923	0.0252404
292	NCS1_KAN360-1_5.tif:0002-0142	0.88	4.464	0	33	89.736	14.573	0.875	3.931	375	1.321	0.757	0.944	0.0365449
293	NCS1_KAN360-1_5.tif:0003-0180	1.205	3.2	0	13	119.617	18.499	0.901	3.857	368	1.268	0.789	0.906	0.0358627
294	NCS1_KAN360-1_5.tif:0004-0215	0.964	3.848	0	18	69.961	22.045	0.914	3.711	354	1.325	0.755	0.934	0.0344984
295	NCS1_KAN360-1_5.tif:0005-0271	1.153	2.8	0	16	42.949	27.737	0.955	3.228	308	1.13	0.885	0.905	0.0300156
296	NCS1_KAN360-1_5.tif:0006-0400	0.849	2.531	0	13	23.967	41.026	0.95	2.149	205	1.148	0.871	0.953	0.0199779
297	NCS1_KAN360-1_5.tif:0007-0418	1.111	2.434	0	11	81.494	42.788	0.932	2.704	258	1.205	0.83	0.934	0.0251429
298	NCS1_KAN360-1_5.tif:0008-0475	1.017	2.072	0	9	102.087	48.71	0.921	2.107	201	1.212	0.825	0.928	0.0195881
299	NCS1_KAN360-1_5.tif:0009-0687	1.101	2.81	0	14	99.302	70.318	0.896	3.092	295	1.218	0.821	0.917	0.0287487
300	NCS1_KAN360-1_5.tif:0010-0688	1.342	3.68	0	21	122.981	70.499	0.852	4.937	471	1.226	0.815	0.886	0.0459004
301	NCS1_KAN360-1_5.tif:0011-0731	0.901	3.012	0	36	19.355	74.921	0.827	2.715	259	1.376	0.727	0.905	0.0252404
302	NCS1_KAN360-1_5.tif:0012-0788	0.985	3.138	0	18	55.729	80.714	0.934	3.092	295	1.261	0.793	0.94	0.0287487
303	NCS1_KAN360-1_5.tif:0013-0953	1.069	2.422	0	10	120.265	97.595	0.968	2.589	247	1.063	0.941	0.944	0.0240709
304	NCS1_KAN360-1_6.tif:0001-0035	1.027	2.459	0	12	31.457	3.646	0.993	2.526	241	1.05	0.952	0.929	0.0234862
305	NCS1_KAN360-1_6.tif:0002-0143	0.901	2.744	0	13	121.648	14.696	0.946	2.474	236	1.246	0.803	0.925	0.0229989
306	NCS1_KAN360-1_6.tif:0003-0260	1.268	2.438	0	13	93.653	26.572	0.91	3.092	295	1.279	0.782	0.917	0.0287487
307	NCS1_KAN360-1_6.tif:0004-0282	1.373	2	0	9	61.761	28.905	0.906	2.746	262	1.249	0.801	0.916	0.0255327
308	NCS1_KAN360-1_6.tif:0005-0424	1.216	3.155	0	15	22.423	43.475	0.883	3.836	366	1.395	0.717	0.892	0.0356678
309	NCS1_KAN360-1_6.tif:0006-0731	1.08	2.049	0	10	41.969	74.771	0.827	2.212	211	1.759	0.568	0.945	0.0205626
310	NCS1_KAN360-1_6.tif:0007-0777	1.017	2.691	0	23	135.2	79.56	0.921	2.736	261	1.332	0.751	0.919	0.0254353
311	NCS1_KAN360-1_6.tif:0008-0827	1.237	4.873	0	46	113.708	84.715	0.964	6.027	575	1.027	0.973	0.937	0.0560355
312	NCS1_KAN360-1_6.tif:0009-0844	1.059	3.347	0	19	76.191	86.481	0.946	3.543	338	1.201	0.833	0.906	0.0329391
313	NCS1_KAN360-1_6.tif:0010-0909	1.08	1.913	0	12	26.353	93.114	0.906	2.065	197	1.306	0.766	0.928	0.0191983
314	NCS1_KAN360-1_6.tif:0011-0938	1.069	4.608	0	27	135.103	96.045	0.926	4.926	470	1.321	0.757	0.923	0.045803
315	NCS1_KAN360-1_6.tif:0012-1001	1.174	2.714	0	13	100.784	102.547	0.899	3.186	304	1.324	0.755	0.949	0.0296257
										294.165				0.0286672
316	NCS1_KAN360-2_1.tif:0001-0097	1.394	103.782	0	544	57.498	9.952	0.809	144.681	13803	1.311	0.763	0.864	1.34515
317	NCS1_KAN360-2_1.tif:0002-0141	0.954	59.374	0	232	30.693	14.445	0.905	56.633	5403	1.209	0.827	0.929	0.526539
318	NCS1_KAN360-2_1.tif:0003-0189	1.205	35.017	0	140	139.556	19.397	0.952	42.21	4027	1.302	0.768	0.954	0.392444
319	NCS1_KAN360-2_1.tif:0004-0191	1.006	102.292	0	690	136.277	19.6	0.829	102.932	9820	1.35	0.741	0.901	0.956989
320	NCS1_KAN360-2_1.tif:0005-0330	1.059	14.802	0	62	30.346	33.83	0.861	15.67	1495	1.299	0.77	0.906	0.145692
321	NCS1_KAN360-2_1.tif:0006-0334	1.268	40.76	0	263	101.658	34.164	0.86	51.697	4932	1.454	0.688	0.906	0.480639
322	NCS1_KAN360-2_1.tif:0007-0333	1.143	59.642	0	296	119.502	34.197	0.891	68.143	6501	1.208	0.828	0.912	0.633543
323	NCS1_KAN360-2_1.tif:0008-0471	1.132	148.852	0	843	62.176	48.225	0.905	168.506	16076	1.219	0.82	0.952	1.56666
324	NCS1_KAN360-2_1.tif:0009-0724	1.216	2.81	0	12	101.152	74.137	0.936	3.417	326	1.178	0.849	0.913	0.0317697
325	NCS1_KAN360-2_1.tif:0010-0805	0.943	40.878	0	214	31.337	82.478	0.895	38.563	3679	1.436	0.697	0.933	0.35853
326	NCS1_KAN360-2_1.tif:0011-0874	1.153	79.464	0	266	74.693	89.513	0.967	91.622	8741	1.087	0.92	0.94	0.851837
327	NCS1_KAN360-2_2.tif:0001-0050	0.964	128.315	0	731	90.99	5.111	0.914	123.738	11805	1.357	0.737	0.929	1.15043
328	NCS1_KAN360-2_2.tif:0002-0112	1.363	35.692	0	121	80.449	11.521	0.951	48.636	4640	1.094	0.914	0.932	0.452182
329	NCS1_KAN360-2_2.tif:0003-0141	1.006	3.125	0	16	36.1	14.408	0.924	3.145	300	1.18	0.847	0.937	0.0292359
330	NCS1_KAN360-2_2.tif:0004-0371	0.985	17.723	0	73	38.505	37.964	0.953	17.463	1666	1.227	0.815	0.913	0.162357
331	NCS1_KAN360-2_2.tif:0005-0485	1.017	32.66	0	104	92.556	49.711	0.964	33.207	3168	1.138	0.879	0.951	0.308731
332	NCS1_KAN360-2_2.tif:0006-0489	1.184	30.796	0	195	134.356	50.062	0.896	36.477	3480	1.323	0.756	0.922	0.339137
333	NCS1_KAN360-2_2.tif:0007-0658	1.237	72.958	0	296	139.005	67.357	0.898	90.238	8609	1.286	0.777	0.918	0.838974
334	NCS1_KAN360-2_2.tif:0008-0660	1.038	68.677	0	404	78.861	67.705	0.809	71.266	6799	1.439	0.695	0.868	0.662584
335	NCS1_KAN360-2_2.tif:0009-0667	0.87	3.639	0	30	55.189	68.336	1	3.166	302	1.141	0.877	0.965	0.0294308
336	NCS1_KAN360-2_2.tif:0010-0779	1.394	55.459	0	260	127.776	79.679	0.652	77.314	7376	1.407	0.711	0.809	0.718814
337	NCS1_KAN360-2_2.tif:0011-0808	1.09	75.038	0	382	19.444	82.741	0.7	81.8	7804	1.601	0.624	0.794	0.760524
338	NCS1_KAN360-2_2.tif:0012-0828	1.53	105.76	0	715	109.136	84.734	0.815	161.85	15441	1.316	0.76	0.877	1.50477
339	NCS1_KAN360-2_3.tif:0001-0400	1.625	89.955	0	734	83.151	40.986	0.785	146.149	13943	1.676	0.597	0.883	1.35879
340	NCS1_KAN360-2_3.tif:0002-0402	1.006	20.844	0	95	119.289	41.16	0.973	20.974	2001	1.18	0.848	0.923	0.195004
341	NCS1_KAN360-2_3.tif:0003-0441	1.981	144.677	0	465	104.184	45.132	0.734	286.616	27344	1.476	0.678	0.851	2.66476
342	NCS1_KAN360-2_3.tif:0004-0567	1.373	64.252	0	338	120.196	58.059	0.892	88.226	8417	1.145	0.874	0.939	0.820263
343	NCS1_KAN360-2_3.tif:0005-0652	1.457	56.532	0	468	77.615	66.742	0.795	82.366	7858	1.53	0.654	0.863	0.765786
344	NCS1_KAN360-2_3.tif:0006-0819	0.922	188.909	14	498	87.238	83.828	0.887	174.25	16624	1.515	0.66	0.962	1.62006
345	NCS1_KAN360-2_3.tif:0007-0885	1.279	70.197	0	534	68.837	90.69	0.77	89.767	8564	1.513	0.661	0.856	0.834588
346	NCS1_KAN360-2_3.tif:0008-0904	1.237	268.915	0	1774	86.678	92.642	0.794	332.61	31732	1.375	0.727	0.843	3.09238
347	NCS1_KAN360-2_3.tif:0009-0983	1.342	41.281	0	280	89.455	100.643	0.795	55.386	5284	1.433	0.698	0.898	0.514942
348	NCS1_KAN360-2_4.tif:0001-0043	1.163	60.955	0	455	140.475	4.378	0.831	70.92	6766	1.404	0.712	0.906	0.659368
349	NCS1_KAN360-2_4.tif:0002-0159	0.985	4.043	0	19	63.748	16.304	0.922	3.983	380	1.036	0.965	0.913	0.0370322
350	NCS1_KAN360-2_4.tif:0003-0168	0.996	5.011	0	39	80.696	17.191	0.963	4.989	476	1.209	0.827	0.913	0.0463877
351	NCS1_KAN360-2_4.tif:0004-0172	1.583	71.55	0	505	28.531	17.587	0.864	113.246	10804	1.428	0.7	0.915	1.05288
352	NCS1_KAN360-2_4.tif:0005-0295	1.415	110.504	0	762	109.031	30.224	0.898	156.368	14918	1.111	0.9	0.915	1.45381
353	NCS1_KAN360-2_4.tif:0006-0400	1.059	5.941	0	28	2.664	40.905	0.888	6.289	600	1.345	0.743	0.918	0.0584719
354	NCS1_KAN360-2_4.tif:0007-0481	1.006	65.427	0	320	28.376	49.306	0.973	65.837	6281	1.033	0.968	0.923	0.612103
355	NCS1_KAN360-2_4.tif:0008-0529	1.038	89.869	0	349	83.898	54.219	0.94	93.257	8897	1.028	0.973	0.93	0.86704
356	NCS1_KAN360-2_4.tif:0009-0618	1.289	252.407	0	1768	115.199	63.224	0.91	325.42	31046	1.315	0.761	0.914	3.02553
357	NCS1_KAN360-2_4.tif:0010-0806	0.912	107.943	0	506	42.139	82.542	0.907	98.435	9391	1.182	0.846	0.946	0.915182
358	NCS1_KAN360-2_4.tif:0011-0937	0.922	2.193	0	10	75.825	96	0.935	2.023	193	1.154	0.867	0.917	0.0188084
359	NCS1_KAN360-2_4.tif:0012-0971	1.551	77.696	0	593	115.611	99.335	0.834	120.531	11499	1.455	0.687	0.914	1.12061
360	NCS1_KAN360-2_4.tif:0013-1016	1.268	126.711	0	503	140.269	104.04	0.921	160.708	15332	1.33	0.752	0.917	1.49415
361	NCS1_KAN360-2_5.tif:0001-0015	0.933	77.685	0	338	4.367	1.559	0.979	72.472	6914	1.126	0.888	0.922	0.673791
362	NCS1_KAN360-2_5.tif:0002-0082	1.205	106.217	0	509	108.848	8.436	0.94	128.036	12215	1.265	0.79	0.924	1.19039
363	NCS1_KAN360-2_5.tif:0003-0212	1.467	59.264	0	401	58.847	21.616	0.907	86.968	8297	1.313	0.762	0.933	0.808568
364	NCS1_KAN360-2_5.tif:0004-0400	1.069	42.402	0	148	76.587	40.943	0.809	45.334	4325	1.369	0.73	0.872	0.421485
365	NCS1_KAN360-2_5.tif:0005-0432	1.415	119.156	0	728	131.798	44.292	0.865	168.611	16086	1.443	0.693	0.885	1.56763
366	NCS1_KAN360-2_5.tif:0006-0585	0.964	29.261	0	195	20.998	59.942	0.82	28.217	2692	1.801	0.555	0.915	0.262344
367	NCS1_KAN360-2_5.tif:0007-0631	1.3	129.75	0	747	62.616	64.682	0.892	168.643	16089	1.18	0.847	0.919	1.56792
368	NCS1_KAN360-2_5.tif:0008-0852	1.363	169.3	0	968	105.184	87.339	0.875	230.695	22009	1.141	0.876	0.897	2.14485
369	NCS1_KAN360-2_6.tif:0001-0023	1.163	75.486	0	422	72.362	2.436	0.855	87.827	8379	1.278	0.782	0.91	0.816559
370	NCS1_KAN360-2_6.tif:0002-0161	1.132	88.065	0	303	42.585	16.43	0.894	99.693	9511	1.262	0.792	0.943	0.926876
371	NCS1_KAN360-2_6.tif:0003-0187	1.006	5.604	0	54	123.615	19.189	0.954	5.639	538	1.293	0.773	0.96	0.0524298
372	NCS1_KAN360-2_6.tif:0004-0216	1.143	48.294	0	297	17.744	22.142	0.946	55.177	5264	1.098	0.911	0.908	0.512993
373	NCS1_KAN360-2_6.tif:0005-0263	0.933	143.708	0	545	101.65	26.893	0.694	134.063	12790	1.623	0.616	0.817	1.24643
374	NCS1_KAN360-2_6.tif:0006-0282	0.922	183.091	0	464	97.749	28.94	0.875	168.884	16112	1.376	0.727	0.907	1.57016
375	NCS1_KAN360-2_6.tif:0007-0283	1.143	4.376	0	28	117.128	29.01	0.989	5	477	1.088	0.919	0.936	0.0464851
376	NCS1_KAN360-2_6.tif:0008-0287	1.09	32.894	0	192	50.392	29.406	0.915	35.858	3421	1.317	0.759	0.924	0.333387
377	NCS1_KAN360-2_6.tif:0009-0305	1.761	151.851	0	848	95.332	31.245	0.693	267.403	25511	1.399	0.715	0.828	2.48613
378	NCS1_KAN360-2_6.tif:0010-0516	1.237	60.72	0	307	136.407	52.873	0.873	75.103	7165	1.198	0.835	0.915	0.698251
379	NCS1_KAN360-2_6.tif:0011-0556	1.027	65.265	0	181	90.629	56.949	0.901	67.042	6396	1.315	0.76	0.933	0.62331
380	NCS1_KAN360-2_6.tif:0012-0586	0.954	88.571	0	469	29.854	60.046	0.892	84.484	8060	1.261	0.793	0.892	0.785472
381	NCS1_KAN360-2_6.tif:0013-0687	1.132	84.917	0	343	64.564	70.314	0.95	96.129	9171	1.147	0.872	0.931	0.893742
382	NCS1_KAN360-2_6.tif:0014-0857	1.006	136.49	0	667	38.217	87.74	0.924	137.344	13103	1.159	0.863	0.946	1.27693
383	NCS1_KAN360-2_6.tif:0015-1028	1.08	2.718	0	18	136.462	105.306	0.996	2.935	280	1.071	0.934	0.92	0.0272869
384	NCS1_KAN360-2_6.tif:0016-1034	0.88	2.869	0	12	85.177	105.907	0.835	2.526	241	1.556	0.643	0.918	0.0234862
										8689.7				0.846838
385	NCS1_KAN360-3_1.tif:0001-0074	1.038	43.747	0	256	1.327	7.603	0.844	45.397	4331	1.378	0.726	0.892	0.422069
386	NCS1_KAN360-3_1.tif:0002-0078	0.943	62.478	0	323	21.252	8.044	0.97	58.939	5623	1.282	0.78	0.963	0.547979
387	NCS1_KAN360-3_1.tif:0003-0191	1.289	112.837	0	581	99.804	19.539	0.936	145.478	13879	1.072	0.932	0.921	1.35255
388	NCS1_KAN360-3_1.tif:0004-0224	0.975	41.903	0	192	66.231	23.035	0.956	40.848	3897	1.11	0.901	0.935	0.379775
389	NCS1_KAN360-3_1.tif:0005-0255	1.478	77.759	0	580	24.384	26.053	0.739	114.923	10964	1.994	0.501	0.91	1.06848
390	NCS1_KAN360-3_1.tif:0006-0327	1.027	79.102	0	447	132.625	33.523	0.901	81.255	7752	1.424	0.702	0.938	0.755456
391	NCS1_KAN360-3_1.tif:0007-0460	1.048	12.64	0	67	47.789	47.118	0.937	13.249	1264	1.291	0.774	0.917	0.123181
392	NCS1_KAN360-3_1.tif:0008-0510	1.153	81.491	0	321	96.483	52.165	0.926	93.959	8964	1.112	0.899	0.924	0.87357
393	NCS1_KAN360-3_1.tif:0009-0586	1.258	79.175	0	299	133.253	59.985	0.914	99.588	9501	1.254	0.797	0.909	0.925902
394	NCS1_KAN360-3_1.tif:0010-0683	1.31	59.792	0	466	78.839	69.857	0.73	78.341	7474	1.818	0.55	0.883	0.728364
395	NCS1_KAN360-3_1.tif:0011-0993	1.184	50.434	0	463	50.325	101.585	0.896	59.736	5699	1.294	0.773	0.938	0.555385
396	NCS1_KAN360-3_2.tif:0001-0182	1.143	35.56	0	136	23.248	18.675	0.865	40.628	3876	1.535	0.652	0.916	0.377728
397	NCS1_KAN360-3_2.tif:0002-0190	1.268	25.62	0	148	102.392	19.482	0.921	32.494	3100	1.344	0.744	0.92	0.302105
398	NCS1_KAN360-3_2.tif:0003-0221	1.069	80.147	0	411	55.617	22.664	0.938	85.689	8175	1.111	0.9	0.927	0.796679
399	NCS1_KAN360-3_2.tif:0004-0343	0.88	40.798	0	140	83.898	35.217	0.88	35.921	3427	1.407	0.711	0.884	0.333972
400	NCS1_KAN360-3_2.tif:0005-0449	1.059	23.941	0	163	54.52	46.07	0.851	25.345	2418	1.433	0.698	0.914	0.235642
401	NCS1_KAN360-3_2.tif:0006-0449	0.964	20.652	0	123	129.579	46.018	0.927	19.916	1900	1.233	0.811	0.968	0.185161
402	NCS1_KAN360-3_2.tif:0007-0468	0.87	48.048	0	246	17.368	47.937	0.959	41.802	3988	1.25	0.8	0.938	0.388643
403	NCS1_KAN360-3_2.tif:0008-0594	1.436	129.854	0	900	117.36	60.886	0.922	186.472	17790	1.301	0.769	0.932	1.73369
404	NCS1_KAN360-3_2.tif:0009-0791	0.933	62.461	0	279	90.758	81.085	0.946	58.269	5559	1.174	0.852	0.927	0.541742
405	NCS1_KAN360-3_2.tif:0010-0818	1.038	96.182	0	544	65.152	83.779	0.971	99.808	9522	1.275	0.784	0.934	0.927948
406	NCS1_KAN360-3_2.tif:0011-0822	0.943	17.7	0	91	6.985	84.161	0.895	16.698	1593	1.337	0.748	0.928	0.155243
407	NCS1_KAN360-3_3.tif:0001-0028	1.646	127.758	0	899	90.163	2.84	0.834	210.245	20058	1.608	0.622	0.908	1.95471
408	NCS1_KAN360-3_3.tif:0002-0078	1.143	23.385	0	196	108.631	7.955	0.902	26.718	2549	1.152	0.868	0.936	0.248408
409	NCS1_KAN360-3_3.tif:0003-0148	1.174	44.795	0	383	9.246	15.17	0.815	52.587	5017	1.22	0.82	0.896	0.488922
410	NCS1_KAN360-3_3.tif:0004-0325	1.216	75.905	0	542	63.627	33.251	0.948	92.293	8805	1.08	0.926	0.943	0.858074
411	NCS1_KAN360-3_3.tif:0005-0381	0.996	54.979	0	185	38.608	38.993	0.963	54.747	5223	1.26	0.794	0.922	0.508997
412	NCS1_KAN360-3_3.tif:0006-0402	1.384	111.674	0	787	114.493	41.107	0.865	154.513	14741	1.233	0.811	0.913	1.43656
413	NCS1_KAN360-3_3.tif:0007-0638	0.891	2.871	0	13	42.498	65.312	0.861	2.558	244	1.267	0.789	0.885	0.0237786
414	NCS1_KAN360-3_3.tif:0008-0736	0.87	13.422	0	94	16.546	75.449	0.895	11.677	1114	1.313	0.762	0.927	0.108563
415	NCS1_KAN360-3_3.tif:0009-0753	1.101	77.724	0	498	77.936	77.225	0.695	85.542	8161	1.712	0.584	0.824	0.795315
416	NCS1_KAN360-3_3.tif:0010-0827	1.593	73.566	0	588	98.125	84.685	0.816	117.208	11182	1.711	0.584	0.913	1.08972
417	NCS1_KAN360-3_3.tif:0011-0956	1.3	50.758	0	347	47.2	97.931	0.858	65.973	6294	1.39	0.72	0.902	0.61337
418	NCS1_KAN360-3_3.tif:0012-0981	1.384	69.371	0	385	91.021	100.491	0.791	95.982	9157	1.493	0.67	0.871	0.892378
419	NCS1_KAN360-3_4.tif:0001-0219	1.153	44.055	0	211	35.337	22.499	0.926	50.795	4846	1.183	0.845	0.909	0.472258
420	NCS1_KAN360-3_4.tif:0002-0270	1.426	67.257	0	451	95.839	27.646	0.767	95.878	9147	1.462	0.684	0.866	0.891403
421	NCS1_KAN360-3_4.tif:0003-0304	1.006	40.854	0	156	134.584	31.124	0.954	41.11	3922	1.294	0.773	0.95	0.382211
422	NCS1_KAN360-3_4.tif:0004-0386	0.912	52.31	0	312	26.227	39.527	0.907	47.703	4551	1.457	0.686	0.956	0.443509
423	NCS1_KAN360-3_4.tif:0005-0417	0.839	19.562	0	192	11.245	42.701	0.973	16.404	1565	1.155	0.866	0.964	0.152514
424	NCS1_KAN360-3_4.tif:0006-0484	1.677	106.581	0	584	59.684	49.526	0.726	178.747	17053	1.927	0.519	0.882	1.66187
425	NCS1_KAN360-3_4.tif:0007-0493	1.541	73.327	0	523	107.801	50.458	0.85	112.984	10779	1.402	0.713	0.91	1.05045
426	NCS1_KAN360-3_4.tif:0008-0581	0.943	55.022	0	310	28.747	59.552	0.925	51.906	4952	1.101	0.909	0.923	0.482588
427	NCS1_KAN360-3_4.tif:0009-0749	1.09	7.798	0	66	50.204	76.736	0.903	8.501	811	1.234	0.81	0.885	0.0790345
428	NCS1_KAN360-3_4.tif:0010-0775	1.268	48.157	0	249	129.077	79.364	0.921	61.078	5827	1.282	0.78	0.917	0.567859
429	NCS1_KAN360-3_4.tif:0011-0824	1.3	76.008	0	463	138.705	84.355	0.867	98.792	9425	1.121	0.892	0.902	0.918495
430	NCS1_KAN360-3_4.tif:0012-0932	1.3	134.032	0	944	103.695	95.526	0.892	174.208	16620	1.27	0.787	0.929	1.61967
431	NCS1_KAN360-3_4.tif:0013-0984	1.268	120.455	0	981	29.916	100.819	0.948	152.773	14575	1.318	0.759	0.924	1.42038
432	NCS1_KAN360-3_5.tif:0001-0089	0.943	62.989	0	245	39.495	9.116	0.99	59.422	5669	1.055	0.948	0.938	0.552462
433	NCS1_KAN360-3_5.tif:0002-0150	0.943	7.356	0	101	4.467	15.363	0.925	6.939	662	1.298	0.771	0.928	0.0645139
434	NCS1_KAN360-3_5.tif:0003-0170	0.975	119.645	0	287	80.071	17.422	0.658	116.632	11127	2.263	0.442	0.853	1.08436
435	NCS1_KAN360-3_5.tif:0004-0170	1.122	66.766	0	388	70.644	17.468	0.901	74.882	7144	1.349	0.741	0.911	0.696205
436	NCS1_KAN360-3_5.tif:0005-0265	0.964	8.272	0	73	27.145	27.134	0.914	7.977	761	1.182	0.846	0.925	0.0741618
437	NCS1_KAN360-3_5.tif:0006-0328	1.247	125.832	0	784	55.938	33.634	0.973	156.955	14974	1.119	0.894	0.948	1.45926
438	NCS1_KAN360-3_5.tif:0007-0372	1.3	112.589	0	652	88.917	38.083	0.917	146.337	13961	1.249	0.801	0.925	1.36054
439	NCS1_KAN360-3_5.tif:0008-0398	1.436	61.591	0	522	126.734	40.735	0.874	88.446	8438	1.27	0.787	0.926	0.822309
440	NCS1_KAN360-3_5.tif:0009-0491	1.31	56.752	0	365	77.48	50.22	0.841	74.358	7094	1.342	0.745	0.896	0.691332
441	NCS1_KAN360-3_5.tif:0010-0740	1.122	84.916	0	497	122.648	75.797	0.971	95.238	9086	1.262	0.792	0.943	0.885459
442	NCS1_KAN360-3_5.tif:0011-0749	1.122	53.009	0	354	89.638	76.729	0.901	59.453	5672	1.291	0.775	0.903	0.552754
443	NCS1_KAN360-3_5.tif:0012-0779	0.975	5	0	32	42.372	79.821	0.956	4.874	465	1.281	0.781	0.949	0.0453157
444	NCS1_KAN360-3_5.tif:0013-0793	1.08	67.058	0	271	113.058	81.186	0.965	72.398	6907	1.287	0.777	0.924	0.673108
445	NCS1_KAN360-3_5.tif:0014-0815	0.86	49.902	0	194	3.712	83.429	0.962	42.892	4092	1.099	0.91	0.965	0.398778
446	NCS1_KAN360-3_5.tif:0015-0863	1.247	15.05	0	165	72.677	88.367	0.823	18.773	1791	1.423	0.703	0.888	0.174538
447	NCS1_KAN360-3_5.tif:0016-0925	1.31	62.856	0	429	137.434	94.709	0.777	82.356	7857	1.448	0.691	0.883	0.765689
448	NCS1_KAN360-3_5.tif:0017-0933	1.342	68.977	0	415	97.948	95.467	0.921	92.544	8829	1.283	0.779	0.941	0.860413
449	NCS1_KAN360-3_5.tif:0018-0979	0.933	12.135	0	56	13.781	100.227	0.885	11.32	1080	1.1	0.909	0.913	0.105249
450	NCS1_KAN360-3_6.tif:0001-0012	1.069	55.853	0	360	2.123	1.287	0.881	59.715	5697	1.516	0.66	0.932	0.55519
451	NCS1_KAN360-3_6.tif:0002-0147	1.279	77.672	0	308	43.107	15.085	0.877	99.326	9476	1.091	0.917	0.924	0.923465
452	NCS1_KAN360-3_6.tif:0003-0315	1.331	88.276	0	412	29.589	32.359	0.841	117.512	11211	1.585	0.631	0.937	1.09255
453	NCS1_KAN360-3_6.tif:0004-0314	1.195	80.456	0	310	89.154	32.182	0.932	96.14	9172	1.092	0.915	0.923	0.89384
454	NCS1_KAN360-3_6.tif:0005-0418	1.059	33.772	0	186	57.539	42.83	0.888	35.754	3411	1.652	0.605	0.918	0.332412
455	NCS1_KAN360-3_6.tif:0006-0452	0.839	198.537	0	939	22.959	46.308	0.7	166.483	15883	2.758	0.363	0.941	1.54785
456	NCS1_KAN360-3_6.tif:0007-0541	1.289	106.585	0	856	109.8	55.395	0.899	137.417	13110	1.222	0.818	0.901	1.27761
457	NCS1_KAN360-3_6.tif:0008-0571	1.289	87	0	498	70.28	58.425	0.837	112.166	10701	1.553	0.644	0.918	1.04285
458	NCS1_KAN360-3_6.tif:0009-0697	1.289	75.894	0	527	99.092	71.433	0.993	97.848	9335	1.087	0.92	0.925	0.909725
459	NCS1_KAN360-3_6.tif:0010-0805	0.985	1.84	0	10	32.455	82.434	0.966	1.813	173	1.133	0.882	0.945	0.0168594
460	NCS1_KAN360-3_6.tif:0011-0856	1.059	26.287	0	227	7.493	87.597	0.917	27.829	2655	1.302	0.768	0.914	0.258738
461	NCS1_KAN360-3_6.tif:0012-0863	1.331	3.079	0	19	104.638	88.375	0.845	4.098	391	1.062	0.941	0.885	0.0381042
										7064.7				0.688476
														0
														0
														0
462	NCS1_KAN360-4_1.tif:0001-0078	0.933	18.584	0	87	30.153	8.022	0.946	17.337	1654	1.105	0.905	0.922	0.161187
463	NCS1_KAN360-4_1.tif:0002-0274	1.184	55.991	0	347	55.37	28.064	0.871	66.319	6327	1.053	0.95	0.9	0.616586
464	NCS1_KAN360-4_1.tif:0003-0350	1.09	22.442	0	130	106.761	35.927	0.974	24.465	2334	1.125	0.889	0.924	0.227456
465	NCS1_KAN360-4_1.tif:0004-0356	1.163	102.297	0	545	80.322	36.467	0.976	119.022	11355	1.056	0.947	0.941	1.10658
466	NCS1_KAN360-4_1.tif:0005-0385	1.258	62.133	0	386	20.906	39.429	0.863	78.153	7456	1.577	0.634	0.909	0.72661
467	NCS1_KAN360-4_1.tif:0006-0546	0.839	75.3	0	282	43.923	55.956	0.939	63.143	6024	1.219	0.82	0.947	0.587057
468	NCS1_KAN360-4_1.tif:0007-0585	1.289	103.984	0	440	136.145	59.949	0.936	134.063	12790	1.354	0.739	0.925	1.24643
469	NCS1_KAN360-4_1.tif:0008-0597	1.174	105.679	0	508	94.873	61.158	0.775	124.063	11836	1.94	0.515	0.868	1.15345
470	NCS1_KAN360-4_1.tif:0009-0731	0.88	61.881	0	187	34.004	74.872	0.957	54.485	5198	1.293	0.773	0.913	0.506561
471	NCS1_KAN360-4_1.tif:0010-0767	0.943	31.711	0	118	65.516	78.555	0.957	29.915	2854	1.107	0.903	0.928	0.278131
472	NCS1_KAN360-4_1.tif:0011-0866	1.153	80.409	0	416	78.856	88.716	0.899	92.712	8845	1.343	0.745	0.921	0.861973
473	NCS1_KAN360-4_1.tif:0012-0933	0.954	22.11	0	107	49.688	95.526	0.922	21.09	2012	1.28	0.782	0.905	0.196076
474	NCS1_KAN360-4_1.tif:0013-0994	1.038	89.364	0	284	127.868	101.795	0.809	92.733	8847	2.017	0.496	0.892	0.862167
475	NCS1_KAN360-4_1.tif:0014-1012	1.363	107.123	0	539	116.121	103.717	0.733	145.97	13926	1.851	0.54	0.903	1.35713
476	NCS1_KAN360-4_2.tif:0001-0062	1.216	12.888	0	81	72.228	6.375	0.965	15.67	1495	1.226	0.816	0.917	0.145692
477	NCS1_KAN360-4_2.tif:0002-0119	1.059	6.406	0	34	13.618	12.134	0.959	6.782	647	1.185	0.844	0.944	0.0630521
478	NCS1_KAN360-4_2.tif:0003-0128	1.195	78.228	0	374	35.487	13.14	0.932	93.477	8918	1.171	0.854	0.923	0.869087
479	NCS1_KAN360-4_2.tif:0004-0240	1.122	58.748	0	281	95.987	24.6	0.941	65.889	6286	1.124	0.89	0.93	0.61259
480	NCS1_KAN360-4_2.tif:0005-0287	1.363	78.115	0	501	141	29.45	0.899	106.443	10155	1.045	0.957	0.906	0.989636
481	NCS1_KAN360-4_2.tif:0006-0288	1.31	148.624	0	564	71.584	29.515	0.899	194.732	18578	1.368	0.731	0.916	1.81048
482	NCS1_KAN360-4_2.tif:0007-0379	0.964	21.435	0	135	8.908	38.871	0.945	20.67	1972	1.081	0.925	0.92	0.192177
483	NCS1_KAN360-4_2.tif:0008-0398	1.111	27.792	0	111	99.979	40.717	0.962	30.88	2946	1.286	0.778	0.93	0.287097
484	NCS1_KAN360-4_2.tif:0009-0473	1.3	151.798	0	875	44.384	48.382	0.867	197.3	18823	1.365	0.733	0.925	1.83436
485	NCS1_KAN360-4_2.tif:0010-0592	1.436	139.139	0	830	132.33	60.57	0.888	199.805	19062	1.299	0.77	0.91	1.85765
486	NCS1_KAN360-4_2.tif:0011-0734	0.943	12.833	0	57	1.105	75.154	0.925	12.107	1155	1.317	0.76	0.938	0.112558
487	NCS1_KAN360-4_2.tif:0012-0788	1.006	22.104	0	111	47.967	80.763	0.911	22.243	2122	1.279	0.782	0.928	0.206795
488	NCS1_KAN360-4_2.tif:0013-0883	1.111	41.434	0	208	119.389	90.459	0.932	46.036	4392	1.065	0.939	0.922	0.428014
489	NCS1_KAN360-4_2.tif:0014-0923	1.541	168.401	0	917	95.203	94.5	0.952	259.478	24755	1.075	0.93	0.933	2.41245
490	NCS1_KAN360-4_2.tif:0015-0977	1.184	34.602	0	171	53.167	100.068	0.952	40.984	3910	1.177	0.849	0.915	0.381042
491	NCS1_KAN360-4_3.tif:0001-0047	0.943	42.322	0	169	56.336	4.869	0.895	39.925	3809	1.255	0.797	0.928	0.371199
492	NCS1_KAN360-4_3.tif:0002-0080	0.985	61.553	0	239	82.612	8.257	0.934	60.648	5786	1.292	0.774	0.94	0.563864
493	NCS1_KAN360-4_3.tif:0003-0279	1.562	113.544	0	390	111.563	28.437	0.707	177.332	16918	1.326	0.754	0.812	1.64871
494	NCS1_KAN360-4_3.tif:0004-0301	1.289	92.496	0	546	47.625	30.828	0.932	119.252	11377	1.106	0.905	0.98	1.10872
495	NCS1_KAN360-4_3.tif:0005-0387	1.017	51.454	0	268	54.585	39.642	0.933	52.315	4991	1.139	0.878	0.946	0.486388
496	NCS1_KAN360-4_3.tif:0006-0419	1.216	86.845	0	665	19.175	42.868	0.858	105.594	10074	1.531	0.653	0.924	0.981742
497	NCS1_KAN360-4_3.tif:0007-0443	1.3	55.484	0	261	77.897	45.443	0.858	72.115	6880	1.374	0.728	0.883	0.670477
498	NCS1_KAN360-4_3.tif:0008-0722	0.975	33.247	0	134	52.232	73.949	0.988	32.41	3092	1.13	0.885	0.944	0.301325
499	NCS1_KAN360-4_3.tif:0009-0792	1.3	55.395	0	174	128.069	81.139	0.844	72	6869	1.534	0.652	0.922	0.669405
500	NCS1_KAN360-4_3.tif:0010-0855	1.184	99.708	0	503	30.304	87.557	0.896	118.099	11267	1.302	0.768	0.911	1.098
501	NCS1_KAN360-4_3.tif:0011-0933	1.132	161.759	0	762	115.553	95.599	0.933	183.118	17470	1.217	0.821	0.96	1.70251
502	NCS1_KAN360-4_3.tif:0012-1009	1.132	74.833	0	506	58.127	103.318	0.883	84.714	8082	1.077	0.928	0.889	0.787616
503	NCS1_KAN360-4_4.tif:0001-0005	0.964	102.924	0	642	81.874	0.51	0.717	99.253	9469	2.378	0.42	0.929	0.922783
504	NCS1_KAN360-4_4.tif:0002-0063	2.117	176.074	0	1091	89.765	6.509	0.704	372.808	35567	1.598	0.626	0.842	3.46611
505	NCS1_KAN360-4_4.tif:0003-0086	1.195	173.921	0	348	73.409	8.825	0.701	207.824	19827	1.708	0.585	0.789	1.9322
506	NCS1_KAN360-4_4.tif:0004-0103	2.275	157.756	0	841	66.577	10.514	0.66	358.825	34233	2.092	0.478	0.866	3.33611
507	NCS1_KAN360-4_4.tif:0005-0162	0.985	188.755	4	393	53.648	16.653	0.876	185.98	17743	1.483	0.674	0.94	1.72911
508	NCS1_KAN360-4_4.tif:0006-0215	0.88	176.226	0	454	95.475	22.048	0.726	155.163	14803	1.953	0.512	0.844	1.4426
509	NCS1_KAN360-4_4.tif:0007-0303	1.478	71.908	0	351	101.936	31.015	0.867	106.276	10139	1.429	0.7	0.925	0.988077
510	NCS1_KAN360-4_4.tif:0008-0307	1.111	20.943	0	107	39.691	31.408	0.932	23.27	2220	1.009	0.991	0.926	0.216346
511	NCS1_KAN360-4_4.tif:0009-0357	1.195	47.912	0	229	78.99	36.521	0.904	57.252	5462	1.125	0.889	0.923	0.532289
512	NCS1_KAN360-4_4.tif:0010-0572	1.216	108.388	0	492	110.879	58.607	0.858	131.788	12573	1.18	0.847	0.896	1.22528
513	NCS1_KAN360-4_4.tif:0011-0583	1.101	96.981	0	423	26.422	59.731	0.924	106.737	10183	1.125	0.889	0.917	0.992365
514	NCS1_KAN360-4_4.tif:0012-0630	0.996	69.558	0	259	48.221	64.438	0.873	69.264	6608	1.299	0.77	0.918	0.64397
515	NCS1_KAN360-4_4.tif:0013-0648	1.436	43.299	0	210	85.835	66.363	0.812	62.178	5932	1.579	0.633	0.898	0.578092
516	NCS1_KAN360-4_4.tif:0014-0654	1.635	100.494	0	671	125.31	67.027	0.708	164.324	15677	1.968	0.508	0.872	1.52777
517	NCS1_KAN360-4_4.tif:0015-0823	0.839	35.075	0	196	13.988	84.226	0.906	29.412	2806	1.157	0.865	0.947	0.273453
518	NCS1_KAN360-4_4.tif:0016-0954	1.237	88.78	0	445	106.278	97.678	0.859	109.808	10476	1.413	0.708	0.933	1.02092
519	NCS1_KAN360-4_4.tif:0017-0954	1.017	32.186	0	170	55.239	97.63	0.904	32.724	3122	1.149	0.87	0.951	0.304249
520	NCS1_KAN360-4_5.tif:0001-0102	1.268	175.223	0	638	139.516	10.481	0.846	222.236	21202	1.379	0.725	0.917	2.0662
521	NCS1_KAN360-4_5.tif:0002-0106	1.216	106.759	0	571	55.629	10.833	0.989	129.807	12384	1.143	0.875	0.955	1.20686
522	NCS1_KAN360-4_5.tif:0003-0128	1.499	170.594	0	811	85.147	13.213	0.806	255.705	24395	1.663	0.601	0.905	2.37737
523	NCS1_KAN360-4_5.tif:0004-0207	1.163	210.559	0	508	51.193	21.215	0.947	244.982	23372	1.336	0.749	0.941	2.27767
524	NCS1_KAN360-4_5.tif:0005-0411	1.153	96.845	0	503	55.174	42.113	0.91	111.663	10653	1.241	0.806	0.928	1.03817
525	NCS1_KAN360-4_5.tif:0006-0453	1.478	160.738	0	767	140.125	46.391	0.854	237.561	22664	1.417	0.706	0.925	2.20868
526	NCS1_KAN360-4_5.tif:0007-0550	1.635	153.173	0	865	123.593	56.266	0.858	250.464	23895	1.478	0.677	0.94	2.32864
527	NCS1_KAN360-4_5.tif:0008-0588	0.912	12.931	0	55	25.81	60.179	0.943	11.792	1125	1.372	0.729	0.906	0.109635
528	NCS1_KAN360-4_5.tif:0009-0651	0.985	48.787	0	201	65.542	66.631	0.922	48.07	4586	1.222	0.818	0.917	0.44692
529	NCS1_KAN360-4_5.tif:0010-0802	1.803	101.076	0	641	97.296	82.11	0.75	182.227	17385	1.402	0.713	0.829	1.69422
530	NCS1_KAN360-4_5.tif:0011-0942	1.184	48.186	0	199	75.883	96.434	0.896	57.074	5445	1.354	0.738	0.915	0.530632
531	NCS1_KAN360-4_5.tif:0012-1030	1.457	158.374	0	881	131.793	105.451	0.824	230.748	22014	1.667	0.6	0.9	2.14533
532	NCS1_KAN360-4_6.tif:0001-0144	1.163	77.063	0	452	66.575	14.827	0.947	89.662	8554	1.292	0.774	0.949	0.833614
533	NCS1_KAN360-4_6.tif:0002-0165	1.195	84.491	0	416	104.271	16.939	0.943	100.961	9632	1.084	0.922	0.938	0.938668
534	NCS1_KAN360-4_6.tif:0003-0174	1.184	65.062	0	206	36.697	17.812	0.912	77.063	7352	1.306	0.766	0.908	0.716475
535	NCS1_KAN360-4_6.tif:0004-0407	0.86	58.646	0	249	6.22	41.698	0.915	50.407	4809	1.164	0.859	0.927	0.468652
536	NCS1_KAN360-4_6.tif:0005-0596	1.237	37.517	0	163	123.744	61.062	0.829	46.403	4427	1.238	0.807	0.861	0.431425
537	NCS1_KAN360-4_6.tif:0006-0643	1.006	61.021	0	305	56.009	65.869	0.883	61.403	5858	1.305	0.766	0.91	0.57088
538	NCS1_KAN360-4_6.tif:0007-0653	1.195	12.851	0	77	69.682	66.901	0.932	15.356	1465	1.388	0.721	0.931	0.142769
539	NCS1_KAN360-4_6.tif:0008-0814	1.101	43.952	0	146	133.111	83.317	0.924	48.374	4615	1.264	0.791	0.925	0.449746
540	NCS1_KAN360-4_6.tif:0009-0941	1.205	82.73	0	332	67.425	96.315	0.924	99.724	9514	1.137	0.879	0.947	0.927169
541	NCS1_KAN360-4_6.tif:0010-0974	1.3	154.419	0	601	93.565	99.74	0.892	200.707	19148	1.095	0.914	0.908	1.86603
										10182.8				0.992344
542	NCS1_KAN360-5_1.tif:0001-0219	1.31	61.88	0	325	90.905	22.428	0.864	81.077	7735	1.428	0.7	0.919	0.7538
543	NCS1_KAN360-5_1.tif:0002-0376	1.237	68.864	0	411	126.026	38.582	0.953	85.176	8126	1.094	0.914	0.915	0.791904
544	NCS1_KAN360-5_1.tif:0003-0459	0.954	9.813	0	53	65.261	46.98	0.864	9.36	893	1.252	0.799	0.901	0.0870256
545	NCS1_KAN360-5_1.tif:0004-0574	1.237	13.347	0	162	130.887	58.817	0.803	16.509	1575	1.599	0.625	0.908	0.153489
546	NCS1_KAN360-5_1.tif:0005-0673	1.017	39.299	0	213	80.713	68.881	0.88	39.957	3812	1.367	0.732	0.898	0.371491
547	NCS1_KAN360-5_1.tif:0006-0737	0.912	14.437	0	80	37.641	75.452	0.912	13.165	1256	1.3	0.769	0.892	0.122401
548	NCS1_KAN360-5_1.tif:0007-0774	0.849	11.543	0	57	73.207	79.289	0.985	9.801	935	1.142	0.876	0.959	0.0911186
549	NCS1_KAN360-5_1.tif:0008-0970	1.321	70.865	0	458	101.406	99.405	0.775	93.593	8929	1.853	0.54	0.863	0.870159
550	NCS1_KAN360-5_2.tif:0001-0084	0.901	333.326	0	2293	66.445	8.6	0.994	300.473	28666	1.046	0.956	0.945	2.79359
551	NCS1_KAN360-5_2.tif:0002-0118	0.87	69.988	0	347	122.885	12.096	0.788	60.889	5809	1.804	0.554	0.865	0.566105
552	NCS1_KAN360-5_2.tif:0003-0210	1.174	66.125	0	342	63.989	21.573	0.806	77.629	7406	1.483	0.674	0.885	0.721738
553	NCS1_KAN360-5_2.tif:0004-0248	0.943	427.389	0	2020	133.01	25.433	0.97	403.185	38465	1.247	0.802	0.968	3.74853
554	NCS1_KAN360-5_2.tif:0005-0303	1.101	7.152	0	43	106.267	31.041	0.965	7.872	751	1.236	0.809	0.955	0.0731873
555	NCS1_KAN360-5_2.tif:0006-0312	1.111	16.425	0	67	64.219	31.957	0.916	18.249	1741	1.208	0.828	0.942	0.169666
556	NCS1_KAN360-5_2.tif:0007-0374	0.912	14.529	0	84	38.592	38.288	1	13.249	1264	1.022	0.978	0.951	0.123181
557	NCS1_KAN360-5_2.tif:0008-0392	0.849	180.568	24	433	18.671	40.118	0.985	153.308	14626	1.138	0.878	0.964	1.42535
558	NCS1_KAN360-5_2.tif:0009-0513	1.321	39.611	0	278	137.584	52.575	0.755	52.315	4991	1.431	0.699	0.854	0.486388
559	NCS1_KAN360-5_2.tif:0010-0522	1.331	60.449	0	371	119.427	53.51	0.94	80.469	7677	1.17	0.855	0.937	0.748147
560	NCS1_KAN360-5_2.tif:0011-0534	1.153	27.391	0	151	73.565	54.664	0.926	31.582	3013	1.24	0.806	0.909	0.293626
561	NCS1_KAN360-5_2.tif:0012-0613	0.87	47.843	0	201	23.014	62.775	0.926	41.623	3971	1.453	0.688	0.949	0.386986
562	NCS1_KAN360-5_2.tif:0013-0650	1.027	12.898	0	74	44.296	66.504	0.889	13.249	1264	1.441	0.694	0.903	0.123181
563	NCS1_KAN360-5_2.tif:0014-0687	1.038	7.192	0	62	78.322	70.413	0.927	7.463	712	1.114	0.898	0.904	0.0693866
564	NCS1_KAN360-5_2.tif:0015-0712	1.059	309.446	0	1256	125.464	72.813	0.735	327.6	31254	1.382	0.724	0.831	3.0458
565	NCS1_KAN360-5_2.tif:0016-0757	0.86	22.817	0	104	29.235	77.522	0.948	19.612	1871	1.114	0.897	0.932	0.182335
566	NCS1_KAN360-5_2.tif:0017-0886	0.891	16.612	0	71	16.294	90.719	0.983	14.8	1412	1.063	0.941	0.944	0.137604
567	NCS1_KAN360-5_2.tif:0018-0978	1.069	10.814	0	102	102.649	100.124	0.968	11.561	1103	1.236	0.809	0.94	0.107491
568	NCS1_KAN360-5_3.tif:0001-0120	0.975	11.559	0	93	33.262	12.307	0.912	11.268	1075	1.245	0.803	0.912	0.104762
569	NCS1_KAN360-5_3.tif:0002-0274	1.216	18.328	0	170	76.406	28.057	0.932	22.284	2126	1.218	0.821	0.951	0.207185
570	NCS1_KAN360-5_3.tif:0003-0274	1.163	21.568	0	133	111.762	28.119	0.907	25.094	2394	1.238	0.808	0.917	0.233303
571	NCS1_KAN360-5_3.tif:0004-0310	0.912	13.954	0	128	9.922	31.808	0.991	12.725	1214	1.044	0.958	0.921	0.118308
572	NCS1_KAN360-5_3.tif:0005-0442	0.933	12.663	0	81	38.905	45.332	0.946	11.813	1127	1.399	0.715	0.927	0.10983
573	NCS1_KAN360-5_3.tif:0006-0607	0.922	6.148	0	56	90.772	62.185	0.922	5.671	541	1.041	0.961	0.889	0.0527221
574	NCS1_KAN360-5_3.tif:0007-0756	1.048	46.79	0	199	131.048	77.468	0.981	49.045	4679	1.04	0.962	0.935	0.455983
575	NCS1_KAN360-5_3.tif:0008-0826	1.163	12.315	0	77	101.91	84.537	0.918	14.329	1367	1.275	0.784	0.941	0.133218
576	NCS1_KAN360-5_3.tif:0009-0892	1.258	73.9	0	473	73.658	91.402	0.898	92.953	8868	1.225	0.816	0.927	0.864214
577	NCS1_KAN360-5_3.tif:0010-0973	1.321	86.071	0	463	67.18	99.747	0.858	113.676	10845	1.447	0.691	0.916	1.05688
578	NCS1_KAN360-5_4.tif:0001-0012	1.216	64.578	0	297	71.87	1.237	0.92	78.52	7491	1.288	0.777	0.928	0.730021
579	NCS1_KAN360-5_4.tif:0002-0029	1.006	14.271	0	67	38.657	3.011	0.941	14.36	1370	1.049	0.953	0.914	0.133511
580	NCS1_KAN360-5_4.tif:0003-0279	1.321	63.905	0	425	103.627	28.582	0.881	84.4	8052	1.292	0.774	0.926	0.784692
581	NCS1_KAN360-5_4.tif:0004-0355	1.09	42.654	0	314	59.065	36.312	0.944	46.498	4436	1.197	0.836	0.929	0.432302
582	NCS1_KAN360-5_4.tif:0005-0415	1.132	3.037	0	27	9.333	42.532	0.95	3.438	328	1.194	0.838	0.931	0.0319646
583	NCS1_KAN360-5_4.tif:0006-0469	1.153	16.509	0	95	72.448	48.046	0.955	19.035	1816	1.217	0.822	0.917	0.176975
584	NCS1_KAN360-5_4.tif:0007-0486	1.279	11	0	90	130.219	49.72	0.892	14.067	1342	1.21	0.827	0.907	0.130782
585	NCS1_KAN360-5_4.tif:0008-0617	1.08	6.165	0	44	23.536	63.235	0.935	6.656	635	1.074	0.931	0.907	0.0618827
586	NCS1_KAN360-5_4.tif:0009-0719	1.174	53.509	0	192	114.562	73.637	0.943	62.818	5993	1.193	0.838	0.922	0.584036
587	NCS1_KAN360-5_4.tif:0010-0858	1.027	9.663	0	70	49.739	87.885	0.961	9.926	947	1.206	0.829	0.929	0.0922881
588	NCS1_KAN360-5_4.tif:0011-0969	1.059	3.257	0	21	84.752	99.26	0.917	3.449	329	1.149	0.871	0.91	0.0320621
589	NCS1_KAN360-5_5.tif:0001-0024	0.891	11.365	0	92	9.754	2.508	0.968	10.125	966	1.179	0.848	0.914	0.0941397
590	NCS1_KAN360-5_5.tif:0002-0113	1.321	28.095	0	292	41.526	11.595	0.862	37.106	3540	1.368	0.731	0.881	0.344984
591	NCS1_KAN360-5_5.tif:0003-0241	1.467	91.414	0	583	90.41	24.712	0.851	134.147	12798	1.495	0.669	0.895	1.2472
592	NCS1_KAN360-5_5.tif:0004-0246	1.436	503.212	0	2123	39.175	25.172	0.922	722.619		1.377	0.726	0.945	0
593	NCS1_KAN360-5_5.tif:0005-0291	0.839	11.6	0	75	110.317	29.813	1	9.727	928	1.092	0.916	0.952	0.0904365
594	NCS1_KAN360-5_5.tif:0006-0304	0.901	82.86	0	294	59.438	31.177	0.994	74.694	7126	1.192	0.839	0.95	0.694451
595	NCS1_KAN360-5_5.tif:0007-0365	1.111	30.255	0	213	18.044	37.378	0.841	33.615	3207	1.42	0.704	0.898	0.312532
596	NCS1_KAN360-5_5.tif:0008-0411	1.006	219.552	0	847	128.251	42.175	0.661	220.926	21077	1.898	0.527	0.814	2.05402
597	NCS1_KAN360-5_5.tif:0009-0432	1.122	86.626	0	510	118.146	44.211	0.989	97.156	9269	1.015	0.985	0.918	0.903293
598	NCS1_KAN360-5_5.tif:0010-0573	0.891	37.329	0	223	36.633	58.66	0.935	33.259	3173	1.106	0.904	0.904	0.309219
599	NCS1_KAN360-5_5.tif:0011-0578	1.09	53.115	0	325	100.818	59.258	0.974	57.902	5524	1.127	0.887	0.933	0.538331
600	NCS1_KAN360-5_5.tif:0012-0747	1.667	54.484	0	424	102.169	76.475	0.67	90.804	8663	1.123	0.891	0.789	0.844236
601	NCS1_KAN360-5_5.tif:0013-0755	0.912	28.023	0	156	11.583	77.37	0.925	25.555	2438	1.27	0.788	0.916	0.237591
602	NCS1_KAN360-5_5.tif:0014-0843	0.933	42.989	0	214	97.333	86.345	0.993	40.104	3826	1.265	0.79	0.962	0.372856
603	NCS1_KAN360-5_5.tif:0015-0919	1.216	26.595	0	199	131.841	94.029	0.858	32.337	3085	1.362	0.734	0.906	0.300643
604	NCS1_KAN360-5_5.tif:0016-0923	1.31	50.008	0	323	70.168	94.496	0.874	65.522	6251	1.438	0.695	0.936	0.609179
605	NCS1_KAN360-5_5.tif:0017-0926	0.912	19.172	0	252	26.258	94.845	0.865	17.484	1668	1.317	0.759	0.916	0.162552
606	NCS1_KAN360-5_6.tif:0001-0097	1.205	83.565	0	576	123.77	9.898	0.969	100.731	9610	1.044	0.958	0.927	0.936524
607	NCS1_KAN360-5_6.tif:0002-0115	1.279	59.197	0	509	85.17	11.854	0.844	75.7	7222	1.25	0.8	0.897	0.703806
608	NCS1_KAN360-5_6.tif:0003-0266	1.017	18.237	0	185	15.764	27.279	0.997	18.542	1769	1.085	0.922	0.956	0.172395
609	NCS1_KAN360-5_6.tif:0004-0298	0.964	14.761	0	105	43.91	30.555	0.914	14.234	1358	1.295	0.772	0.929	0.132341
610	NCS1_KAN360-5_6.tif:0005-0377	1.216	13	0	108	131.568	38.538	0.858	15.807	1508	1.262	0.792	0.899	0.146959
611	NCS1_KAN360-5_6.tif:0006-0390	1.132	299.972	10	1845	20.793	39.984	0.822	339.581	32397	1.919	0.521	0.904	3.15719
612	NCS1_KAN360-5_6.tif:0007-0444	1.143	19.165	0	173	88.351	45.425	0.902	21.897	2089	1.114	0.897	0.924	0.20358
613	NCS1_KAN360-5_6.tif:0008-0555	0.985	14.394	0	102	32.55	56.834	0.953	14.182	1353	1.267	0.79	0.922	0.131854
614	NCS1_KAN360-5_6.tif:0009-0626	1.08	61.087	0	383	52.78	64.123	0.918	65.952	6292	1.331	0.751	0.949	0.613175
615	NCS1_KAN360-5_6.tif:0010-0784	1.132	23	0	174	79.773	80.282	0.883	26.037	2484	1.273	0.785	0.9	0.242073
616	NCS1_KAN360-5_6.tif:0011-0823	0.933	13.843	0	49	22.305	84.254	0.933	12.914	1232	1.275	0.784	0.899	0.120062
617	NCS1_KAN360-5_6.tif:0012-0873	1.352	37.217	0	255	116.63	89.323	0.902	50.323	4801	1.254	0.797	0.949	0.467872
										5625.15				0.548188
														0
														0
														0
618	NCS1_KAN360-6_1.tif:0001-0043	0.849	323.086	18	1360	5.738	4.459	0.95	274.31	26170	1.363	0.734	0.964	2.55035
619	NCS1_KAN360-6_1.tif:0002-0133	1.006	27.385	0	176	53.802	13.605	0.954	27.557	2629	1.099	0.91	0.946	0.256204
620	NCS1_KAN360-6_1.tif:0003-0134	1.436	67.898	0	436	81.363	13.822	0.855	97.502	9302	1.409	0.71	0.898	0.906509
621	NCS1_KAN360-6_1.tif:0004-0163	1.415	12.748	0	80	62.301	16.658	0.875	18.039	1721	1.442	0.694	0.918	0.167717
622	NCS1_KAN360-6_1.tif:0005-0201	1.069	10.245	0	59	125.375	20.558	0.823	10.954	1045	1.206	0.829	0.857	0.101838
623	NCS1_KAN360-6_1.tif:0006-0204	1.069	9.078	0	74	99.884	20.895	0.968	9.706	926	1.026	0.975	0.936	0.0902416
624	NCS1_KAN360-6_1.tif:0007-0443	1.111	61.057	0	317	134.147	45.356	0.904	67.839	6472	1.175	0.851	0.914	0.630716
625	NCS1_KAN360-6_1.tif:0008-0511	1.017	83.619	0	343	48.463	52.31	0.875	85.018	8111	1.367	0.731	0.951	0.790442
626	NCS1_KAN360-6_1.tif:0009-0598	0.954	35.549	0	227	82.047	61.283	0.954	33.909	3235	1.257	0.795	0.905	0.315261
627	NCS1_KAN360-6_1.tif:0010-0631	0.891	5.882	0	28	15.454	64.605	0.916	5.241	500	1.484	0.674	0.95	0.0487265
628	NCS1_KAN360-6_1.tif:0011-0728	0.996	288.442	0	1738	65.099	74.623	0.741	287.224	27402	1.827	0.547	0.872	2.67041
629	NCS1_KAN360-6_1.tif:0012-0812	0.943	192.056	0	639	126.149	83.066	0.732	181.179	17285	1.934	0.517	0.891	1.68448
630	NCS1_KAN360-6_1.tif:0013-0840	1.122	87.729	0	334	81.643	86.064	0.924	98.393	9387	1.177	0.849	0.951	0.914792
631	NCS1_KAN360-6_1.tif:0014-0896	1.205	61.626	0	363	53.588	91.783	0.851	74.285	7087	1.204	0.831	0.878	0.69065
632	NCS1_KAN360-6_1.tif:0015-0901	1.017	46.526	0	152	133.062	92.249	0.892	47.305	4513	1.266	0.79	0.928	0.439806
633	NCS1_KAN360-6_2.tif:0001-0037	0.901	383.581	14	2314	119.296	3.848	0.816	345.776	32988	1.792	0.558	0.896	3.21478
634	NCS1_KAN360-6_2.tif:0002-0091	1.268	2.355	0	18	54.278	9.369	0.965	2.987	285	1.106	0.904	0.91	0.0277741
635	NCS1_KAN360-6_2.tif:0003-0229	0.88	42.369	0	145	23.034	23.428	0.971	37.305	3559	1.186	0.843	0.939	0.346836
636	NCS1_KAN360-6_2.tif:0004-0268	1.237	74.364	0	372	77.6	27.5	0.873	91.978	8775	1.534	0.652	0.911	0.855151
637	NCS1_KAN360-6_2.tif:0005-0404	1.258	83.308	0	368	50.018	41.452	0.786	104.787	9997	1.561	0.641	0.886	0.974239
638	NCS1_KAN360-6_2.tif:0006-0442	1.31	392.8	0	1845	63.577	45.305	0.789	514.659	49100	1.965	0.509	0.89	4.78495
639	NCS1_KAN360-6_2.tif:0007-0448	1.027	32.622	0	173	86.987	45.828	0.93	33.511	3197	1.263	0.792	0.933	0.311558
640	NCS1_KAN360-6_2.tif:0008-0473	0.839	53.9	0	160	12.149	48.426	1	45.198	4312	1.097	0.911	0.952	0.420218
641	NCS1_KAN360-6_2.tif:0009-0604	1.122	43.084	0	111	128.817	61.849	0.941	48.321	4610	1.16	0.862	0.93	0.449259
642	NCS1_KAN360-6_2.tif:0010-0664	1.174	659.625	2	3032	79.498	68.003	0.927	774.379	73878	1.428	0.7	0.949	7.19964
643	NCS1_KAN360-6_2.tif:0011-0709	0.891	19.012	0	176	28.431	72.621	0.873	16.939	1616	1.293	0.773	0.904	0.157484
644	NCS1_KAN360-6_2.tif:0012-0765	0.87	59.47	0	159	76.499	78.317	0.959	51.738	4936	1.076	0.93	0.933	0.481028
645	NCS1_KAN360-6_2.tif:0013-0877	0.901	43.442	0	192	136.982	89.871	0.914	39.16	3736	1.241	0.806	0.915	0.364085
646	NCS1_KAN360-6_3.tif:0001-0018	0.891	185.235	16	809	78.517	1.846	0.712	165.037	15745	1.596	0.627	0.842	1.5344
647	NCS1_KAN360-6_3.tif:0002-0032	1.132	55.731	0	229	129.994	3.311	0.95	63.09	6019	1.065	0.939	0.939	0.58657
648	NCS1_KAN360-6_3.tif:0003-0193	1.321	83.492	0	582	69.466	19.802	0.881	110.269	10520	1.412	0.708	0.926	1.02521
649	NCS1_KAN360-6_3.tif:0004-0219	1.268	56.025	0	439	100.098	22.462	0.895	71.057	6779	1.334	0.75	0.917	0.660635
650	NCS1_KAN360-6_3.tif:0005-0224	0.975	281.398	0	2020	19.449	22.998	0.829	274.31	26170	1.55	0.645	0.899	2.55035
651	NCS1_KAN360-6_3.tif:0006-0262	0.839	341.45	0	2054	24.529	26.834	1	286.322	27316	1.119	0.894	0.958	2.66203
652	NCS1_KAN360-6_3.tif:0007-0325	1.216	43.629	0	253	138.783	33.261	0.936	53.049	5061	1.114	0.897	0.903	0.49321
653	NCS1_KAN360-6_3.tif:0008-0358	0.954	31.703	0	110	14.812	36.733	0.864	30.24	2885	1.139	0.878	0.892	0.281152
654	NCS1_KAN360-6_3.tif:0009-0437	0.901	40.256	0	190	22.176	44.754	0.98	36.288	3462	1.112	0.899	0.93	0.337383
655	NCS1_KAN360-6_3.tif:0010-0453	1.059	76.752	0	363	96.574	46.434	0.946	81.255	7752	1.158	0.864	0.91	0.755456
656	NCS1_KAN360-6_3.tif:0011-0824	1.488	70.063	0	474	85.809	84.308	0.91	104.284	9949	1.301	0.768	0.896	0.969561
657	NCS1_KAN360-6_3.tif:0012-0853	0.839	3.725	0	26	16.363	87.391	1	3.124	298	1.109	0.902	0.952	0.029041
658	NCS1_KAN360-6_3.tif:0013-0933	1.205	42.209	0	330	51.503	95.523	0.804	50.879	4854	1.511	0.662	0.885	0.473037
659	NCS1_KAN360-6_4.tif:0001-0178	0.985	146.309	0	392	141.09	18.294	0.712	144.157	13753	2.342	0.427	0.883	1.34027
660	NCS1_KAN360-6_4.tif:0002-0210	1.352	287.147	3	2041	74.753	21.579	0.66	388.269	37042	1.657	0.604	0.796	3.60986
661	NCS1_KAN360-6_4.tif:0003-0561	1.059	182.762	0	636	60.28	57.453	0.703	193.485	18459	2.506	0.399	0.948	1.79889
662	NCS1_KAN360-6_4.tif:0004-0708	1.163	445.027	10	1912	22.08	72.518	0.855	517.783	49398	1.593	0.628	0.906	4.81399
663	NCS1_KAN360-6_5.tif:0001-0023	1.52	591.241	0	3029	56.911	2.333	0.965	898.61	85730	1.243	0.805	0.948	8.35465
664	NCS1_KAN360-6_5.tif:0002-0045	0.985	468.851	0	2766	44.382	4.646	0.904	461.956	44072	1.042	0.96	0.931	4.29495
665	NCS1_KAN360-6_5.tif:0003-0053	0.954	22.484	0	158	114.594	5.477	0.922	21.446	2046	1.035	0.967	0.892	0.199389
666	NCS1_KAN360-6_5.tif:0004-0068	0.849	17.593	0	67	8.56	6.917	0.794	14.937	1425	1.257	0.795	0.839	0.138871
667	NCS1_KAN360-6_5.tif:0005-0248	0.901	47.674	0	175	45.877	25.342	0.872	42.976	4100	1.31	0.764	0.887	0.399558
668	NCS1_KAN360-6_5.tif:0006-0294	1.048	33.53	0	209	132.225	30.143	0.868	35.146	3353	1.093	0.915	0.897	0.32676
669	NCS1_KAN360-6_5.tif:0007-0317	0.975	101.108	0	425	11.004	32.52	0.747	98.561	9403	1.605	0.623	0.834	0.916351
670	NCS1_KAN360-6_5.tif:0008-0348	0.954	329.363	10	1828	99.002	35.603	0.935	314.162	29972	1.394	0.717	0.948	2.92086
671	NCS1_KAN360-6_5.tif:0009-0425	1.132	69.491	0	356	135.137	43.545	0.867	78.666	7505	1.38	0.725	0.923	0.731385
672	NCS1_KAN360-6_5.tif:0010-0538	0.985	14.394	0	86	35.228	55.059	0.953	14.182	1353	1.163	0.86	0.922	0.131854
673	NCS1_KAN360-6_5.tif:0011-0642	0.901	34.895	0	180	78.823	65.788	0.98	31.456	3001	1.184	0.845	0.92	0.292457
674	NCS1_KAN360-6_5.tif:0012-0713	1.258	29.467	0	156	117.328	72.962	0.914	37.064	3536	1.229	0.814	0.92	0.344594
675	NCS1_KAN360-6_5.tif:0013-0722	1.059	25.129	0	105	64.583	73.93	0.946	26.603	2538	1.107	0.904	0.906	0.247336
676	NCS1_KAN360-6_5.tif:0014-0821	1.038	380.354	0	2494	57.511	84.051	0.91	394.694	37655	1.26	0.794	0.917	3.6696
677	NCS1_KAN360-6_5.tif:0015-0823	0.922	21.898	0	81	92.535	84.271	1	20.199	1927	1.049	0.953	0.951	0.187792
678	NCS1_KAN360-6_5.tif:0016-0849	0.86	36.805	0	243	38.766	86.888	0.934	31.634	3018	1.343	0.744	0.896	0.294113
679	NCS1_KAN360-6_5.tif:0017-1018	0.996	267.632	23	1364	52.726	104.257	0.691	266.501	25425	2.373	0.421	0.888	2.47774
680	NCS1_KAN360-6_5.tif:0018-1032	0.933	16.191	0	140	43.09	105.674	0.979	15.104	1441	1.102	0.907	0.927	0.14043
681	NCS1_KAN360-6_6.tif:0001-0022	1.111	2.547	0	13	108.716	2.302	0.962	2.83	270	1.121	0.892	0.926	0.0263123
682	NCS1_KAN360-6_6.tif:0002-0185	1.017	15.598	0	94	20.152	18.957	0.921	15.859	1513	1.283	0.78	0.924	0.147447
683	NCS1_KAN360-6_6.tif:0003-0251	1.069	2.412	0	16	60.456	25.702	0.987	2.579	246	1.106	0.904	0.919	0.0239735
684	NCS1_KAN360-6_6.tif:0004-0319	1.205	60.817	0	242	23.406	32.665	0.876	73.31	6994	1.374	0.728	0.895	0.681587
685	NCS1_KAN360-6_6.tif:0005-0402	1.143	19.11	0	96	79.68	41.164	0.989	21.834	2083	1.11	0.901	0.936	0.202995
686	NCS1_KAN360-6_6.tif:0006-0412	1.048	49.81	0	263	116.034	42.252	0.949	52.21	4981	1.44	0.694	0.943	0.485414
687	NCS1_KAN360-6_6.tif:0007-0662	1.09	76.029	0	364	21.011	67.783	0.825	82.88	7907	1.599	0.625	0.881	0.770562
688	NCS1_KAN360-6_6.tif:0008-0671	0.922	23.966	0	194	53.338	68.749	0.875	22.106	2109	1.403	0.713	0.907	0.205529
689	NCS1_KAN360-6_6.tif:0009-0709	0.954	36.352	0	249	130.334	72.585	0.673	34.674	3308	1.259	0.794	0.774	0.322375
690	NCS1_KAN360-6_6.tif:0010-0893	1.457	74.482	0	538	91.223	91.499	0.704	108.519	10353	1.307	0.765	0.861	1.00893
691	NCS1_KAN360-6_6.tif:0011-0942	1.101	3.133	0	15	63.947	96.475	0.924	3.449	329	1.173	0.853	0.921	0.0320621
										11889.6				1.15868
														0
														0
														0
692	NCS1_KAN360-7_1.tif:0001-0037	1.08	72.922	0	436	36.845	3.893	0.918	78.729	7511	1.072	0.933	0.936	0.73197
693	NCS1_KAN360-7_1.tif:0002-0061	1.184	85.195	0	559	87.255	6.293	0.778	100.909	9627	1.561	0.641	0.9	0.938181
694	NCS1_KAN360-7_1.tif:0003-0140	1.426	76.949	0	532	118.879	14.366	0.836	109.693	10465	1.19	0.84	0.883	1.01985
695	NCS1_KAN360-7_1.tif:0004-0188	1.048	77.55	0	307	15.217	19.226	0.937	81.287	7755	1.326	0.754	0.922	0.755749
696	NCS1_KAN360-7_1.tif:0005-0406	1.205	71.852	0	348	47.283	41.601	0.861	86.612	8263	1.162	0.86	0.909	0.805255
697	NCS1_KAN360-7_1.tif:0006-0460	1.562	339.228	0	2146	102.469	47.157	0.755	529.806	50545	1.882	0.531	0.871	4.92577
698	NCS1_KAN360-7_1.tif:0007-0541	0.996	224.411	0	1079	69.429	55.344	0.654	223.463	21319	2.664	0.375	0.918	2.0776
699	NCS1_KAN360-7_1.tif:0008-0573	1.436	101.869	0	514	10.68	58.693	0.864	146.285	13956	1.272	0.786	0.895	1.36006
700	NCS1_KAN360-7_1.tif:0009-0575	1.174	52.634	0	190	111.658	58.907	0.943	61.791	5895	1.511	0.662	0.937	0.574486
701	NCS1_KAN360-7_1.tif:0010-0587	0.996	167.221	0	789	75.66	60.182	0.914	166.515	15886	1.22	0.82	0.945	1.54814
702	NCS1_KAN360-7_1.tif:0011-0661	0.86	330.939	0	1264	133.208	67.726	0.997	284.446	27137	1.133	0.883	0.959	2.64458
703	NCS1_KAN360-7_1.tif:0012-0681	1.279	38.303	0	379	58.303	69.769	0.812	48.982	4673	1.569	0.637	0.862	0.455398
704	NCS1_KAN360-7_1.tif:0013-0778	1.3	124.871	0	921	102.974	79.646	0.892	162.301	15484	1.076	0.93	0.915	1.50896
705	NCS1_KAN360-7_1.tif:0014-0811	0.933	55.607	0	205	25.283	83.126	0.915	51.875	4949	1.172	0.853	0.922	0.482295
706	NCS1_KAN360-7_1.tif:0015-0819	1.279	74.508	0	547	81.188	83.944	0.903	95.28	9090	1.242	0.805	0.917	0.885849
707	NCS1_KAN360-7_1.tif:0016-0976	0.996	33.979	0	161	49.444	99.962	0.976	33.835	3228	1.094	0.914	0.945	0.314579
708	NCS1_KAN360-7_1.tif:0017-1029	1.132	70.5	0	459	126.836	105.446	0.95	79.809	7614	1.172	0.853	0.935	0.742008
709	NCS1_KAN360-7_2.tif:0001-0082	1.226	105.282	0	498	74.984	8.467	0.787	129.116	12318	1.246	0.802	0.86	1.20043
710	NCS1_KAN360-7_2.tif:0002-0133	1.101	36.514	0	118	36.641	13.638	0.953	40.187	3834	1.175	0.851	0.933	0.373635
711	NCS1_KAN360-7_2.tif:0003-0207	1.321	140.508	0	686	35.579	21.205	0.804	185.571	17704	1.634	0.612	0.923	1.72531
712	NCS1_KAN360-7_2.tif:0004-0289	1.205	23.713	0	156	106.667	29.638	0.851	28.584	2727	1.085	0.922	0.875	0.265755
713	NCS1_KAN360-7_2.tif:0005-0396	1.331	101.976	0	813	68.717	40.596	0.929	135.751	12951	1.199	0.834	0.907	1.26211
714	NCS1_KAN360-7_2.tif:0006-0464	1.069	62.941	0	358	28.446	47.558	0.87	67.294	6420	1.46	0.685	0.915	0.625649
715	NCS1_KAN360-7_2.tif:0007-0497	1.782	84	0	814	127.647	51.034	0.653	149.681	14280	1.545	0.647	0.831	1.39163
716	NCS1_KAN360-7_2.tif:0008-0683	1.101	157.143	0	666	103.661	69.958	0.953	172.951	16500	1.153	0.867	0.933	1.60798
717	NCS1_KAN360-7_2.tif:0009-0779	0.975	9.946	0	61	1.765	79.833	0.943	9.696	925	1.137	0.88	0.907	0.0901441
718	NCS1_KAN360-7_2.tif:0010-0846	1.101	62.181	0	439	115.361	86.698	0.896	68.436	6529	1.209	0.827	0.909	0.636271
719	NCS1_KAN360-7_2.tif:0011-0890	1.384	93.152	0	680	77.709	91.129	0.888	128.885	12296	1.52	0.658	0.94	1.19828
720	NCS1_KAN360-7_3.tif:0001-0031	0.943	163.989	19	306	131.072	3.222	0.655	154.702	14759	2.432	0.411	0.826	1.43831
721	NCS1_KAN360-7_3.tif:0002-0070	1.059	254.842	0	1359	85.731	7.148	0.747	269.793	25739	2.14	0.467	0.867	2.50835
722	NCS1_KAN360-7_3.tif:0003-0097	1.132	64.898	0	423	3.363	9.955	0.857	73.467	7009	1.498	0.668	0.9	0.683049
723	NCS1_KAN360-7_3.tif:0004-0106	0.985	145.5	0	354	132.483	10.784	0.654	143.36	13677	2.613	0.383	0.913	1.33287
724	NCS1_KAN360-7_3.tif:0005-0254	1.174	75.643	0	437	55.482	26.086	0.889	88.802	8472	1.182	0.846	0.907	0.825623
725	NCS1_KAN360-7_3.tif:0006-0399	1.195	88.219	0	669	136.899	40.867	0.659	105.416	10057	1.964	0.509	0.792	0.980086
726	NCS1_KAN360-7_3.tif:0007-0557	1.069	13.873	0	59	81.317	57.067	0.87	14.832	1415	1.353	0.739	0.899	0.137896
727	NCS1_KAN360-7_3.tif:0008-0592	1.677	38.869	0	323	133.512	60.631	0.795	65.187	6219	1.172	0.854	0.847	0.606061
728	NCS1_KAN360-7_3.tif:0009-0754	1.101	24.295	0	281	74.298	77.187	0.734	26.739	2551	1.209	0.827	0.837	0.248603
729	NCS1_KAN360-7_3.tif:0010-0781	1.143	89.303	0	500	93.325	79.993	0.865	102.03	9734	1.407	0.711	0.912	0.948608
730	NCS1_KAN360-7_3.tif:0011-0783	0.849	46.58	0	184	44.181	80.159	0.985	39.548	3773	1.129	0.885	0.959	0.367691
731	NCS1_KAN360-7_3.tif:0012-0815	0.86	2.963	0	15	21.048	83.455	0.902	2.547	243	1.438	0.695	0.901	0.0236811
732	NCS1_KAN360-7_4.tif:0001-0060	1.174	69.464	0	426	40.95	6.218	0.806	81.549	7780	1.349	0.742	0.896	0.758185
733	NCS1_KAN360-7_4.tif:0002-0167	1.394	84.541	0	475	71.825	17.163	0.871	117.858	11244	1.441	0.694	0.911	1.09576
734	NCS1_KAN360-7_4.tif:0003-0215	0.891	188.976	0	431	134.458	21.962	0.845	168.37	16063	1.433	0.698	0.895	1.56539
735	NCS1_KAN360-7_4.tif:0004-0370	1.646	78.51	0	428	107.401	37.921	0.855	129.199	12326	1.312	0.762	0.902	1.20121
736	NCS1_KAN360-7_4.tif:0005-0432	0.943	191.067	12	434	128.677	44.285	0.802	180.246	17196	1.774	0.564	0.905	1.6758
737	NCS1_KAN360-7_4.tif:0006-0475	1.394	87.338	0	494	139.116	48.652	0.858	121.757	11616	1.489	0.671	0.953	1.13202
738	NCS1_KAN360-7_4.tif:0007-0487	0.839	111.263	0	374	10.262	49.839	0.862	93.299	8901	1.559	0.641	0.936	0.86743
739	NCS1_KAN360-7_4.tif:0008-0509	1.363	74.285	0	469	85.086	52.136	0.82	101.223	9657	1.552	0.644	0.906	0.941104
740	NCS1_KAN360-7_4.tif:0009-0512	1.226	55.299	0	336	58.353	52.556	0.842	67.818	6470	1.164	0.859	0.9	0.630521
741	NCS1_KAN360-7_4.tif:0010-0535	0.88	198.238	9	524	114.069	54.777	0.937	174.544	16652	1.298	0.771	0.944	1.62279
742	NCS1_KAN360-7_4.tif:0011-0542	0.985	13.989	0	101	33.089	55.567	0.934	13.784	1315	1.284	0.779	0.954	0.128151
743	NCS1_KAN360-7_4.tif:0012-0677	1.667	77.799	0	439	107.743	69.339	0.772	129.661	12370	1.762	0.568	0.878	1.20549
744	NCS1_KAN360-7_4.tif:0013-0723	0.839	161.95	0	440	140.62	74.073	0.7	135.803	12956	2.351	0.425	0.899	1.2626
745	NCS1_KAN360-7_4.tif:0014-0769	1.205	32.678	0	142	104.521	78.722	0.969	39.391	3758	1.093	0.915	0.927	0.366229
746	NCS1_KAN360-7_4.tif:0015-0808	0.849	8.84	0	98	28.123	82.74	0.936	7.505	716	1.146	0.873	0.915	0.0697764
747	NCS1_KAN360-7_4.tif:0016-0895	1.163	33.811	0	149	130.98	91.659	0.947	39.338	3753	1.114	0.898	0.941	0.365741
748	NCS1_KAN360-7_4.tif:0017-0978	0.943	24.678	0	110	122.676	100.099	0.925	23.28	2221	1.072	0.933	0.928	0.216443
749	NCS1_KAN360-7_4.tif:0018-0997	1.446	168.304	0	1017	88.597	102.057	0.894	243.452	23226	1.255	0.797	0.908	2.26345
750	NCS1_KAN360-7_5.tif:0001-0151	1.226	72.145	0	468	22.768	15.394	0.842	88.477	8441	1.47	0.68	0.903	0.822602
751	NCS1_KAN360-7_5.tif:0002-0185	1.027	28.041	0	115	77.406	18.996	0.918	28.804	2748	1.287	0.777	0.907	0.267801
752	NCS1_KAN360-7_5.tif:0003-0199	1.184	57.735	0	322	61.055	20.42	0.923	68.384	6524	1.25	0.8	0.919	0.635784
753	NCS1_KAN360-7_5.tif:0004-0312	0.943	36.211	0	165	11.094	31.876	0.817	34.16	3259	1.401	0.714	0.865	0.3176
754	NCS1_KAN360-7_5.tif:0005-0410	1.509	123.431	0	691	105.693	41.912	0.784	186.305	17774	1.374	0.728	0.873	1.73213
755	NCS1_KAN360-7_5.tif:0006-0505	1.122	94.935	0	530	35.065	51.777	0.874	106.475	10158	1.222	0.818	0.895	0.989928
756	NCS1_KAN360-7_5.tif:0007-0506	1.101	106.657	0	660	70.689	51.793	0.924	117.386	11199	1.28	0.781	0.921	1.09138
757	NCS1_KAN360-7_5.tif:0008-0774	1.111	30.792	0	122	112.988	79.286	0.932	34.213	3264	1.245	0.803	0.93	0.318087
758	NCS1_KAN360-7_5.tif:0009-0853	0.901	36.733	0	166	6.87	87.36	0.733	33.112	3159	2.03	0.493	0.856	0.307854
759	NCS1_KAN360-7_5.tif:0010-0891	1.111	55.736	0	321	89.292	91.294	0.817	61.927	5908	1.902	0.526	0.91	0.575753
760	NCS1_KAN360-7_5.tif:0011-0904	0.996	7.989	0	35	44.745	92.645	0.919	7.956	759	1.209	0.827	0.888	0.0739669
761	NCS1_KAN360-7_6.tif:0001-0154	1.488	75.218	0	552	57.018	15.816	0.755	111.957	10681	1.962	0.51	0.879	1.0409
762	NCS1_KAN360-7_6.tif:0002-0200	1.509	84.222	0	330	122.922	20.506	0.747	127.124	12128	2.008	0.498	0.897	1.18191
763	NCS1_KAN360-7_6.tif:0003-0341	1.174	10.616	0	75	109.85	34.86	0.889	12.463	1189	1.529	0.654	0.926	0.115872
764	NCS1_KAN360-7_6.tif:0004-0507	1.363	106.408	0	729	62.185	51.907	0.799	144.996	13833	1.754	0.57	0.897	1.34807
765	NCS1_KAN360-7_6.tif:0005-0526	0.964	25.565	0	84	15.698	53.836	0.89	24.653	2352	1.129	0.886	0.885	0.22921
766	NCS1_KAN360-7_6.tif:0006-0760	1.394	95.504	0	684	106.888	77.798	0.75	133.141	12702	1.509	0.663	0.878	1.23785
767	NCS1_KAN360-7_6.tif:0007-0783	0.839	28.038	0	243	71.13	80.209	0.893	23.511	2243	1.232	0.812	0.914	0.218587
768	NCS1_KAN360-7_6.tif:0008-0817	0.87	45.337	0	177	84.625	83.688	0.926	39.443	3763	1.304	0.767	0.927	0.366716
769	NCS1_KAN360-7_6.tif:0009-0823	1.027	84.735	0	475	139.031	84.289	0.961	87.041	8304	1.044	0.958	0.929	0.80925
770	NCS1_KAN360-7_6.tif:0010-0931	1.017	46.784	0	299	21.843	95.386	0.77	47.567	4538	1.786	0.56	0.866	0.442242
771	NCS1_KAN360-7_6.tif:0011-0973	0.901	48.035	0	277	64.287	99.614	0.927	43.301	4131	1.051	0.952	0.935	0.402579
772	NCS1_KAN360-7_6.tif:0012-0983	1.069	204.686	19	675	129.537	100.704	0.73	218.84	20878	2.405	0.416	0.953	2.03463
										9650.42				0.940463
														0
														0
														0
773	NCS1_KAN360-8_1.tif:0001-0260	1.143	3.44	0	23	120.589	26.662	0.84	3.931	375	1.382	0.723	0.901	0.0365449
774	NCS1_KAN360-8_1.tif:0002-0370	1.237	3.22	0	13	81.588	37.908	0.925	3.983	380	1.305	0.766	0.918	0.0370322
775	NCS1_KAN360-8_1.tif:0003-0525	1.31	3.664	0	31	102.319	53.75	0.741	4.801	458	1.88	0.532	0.853	0.0446335
776	NCS1_KAN360-8_1.tif:0004-0686	0.849	2.963	0	18	31.353	70.23	0.904	2.516	240	1.06	0.943	0.91	0.0233887
777	NCS1_KAN360-8_1.tif:0005-0791	1.09	2.712	0	13	86.857	80.958	0.861	2.956	282	1.397	0.716	0.933	0.0274818
778	NCS1_KAN360-8_1.tif:0006-0839	1.038	2.444	0	12	121.209	85.884	0.94	2.537	242	1.205	0.83	0.93	0.0235836
779	NCS1_KAN360-8_1.tif:0007-1024	0.891	3.247	0	11	25.86	104.829	0.916	2.893	276	1.218	0.821	0.944	0.0268971
780	NCS1_KAN360-8_2.tif:0001-0091	1.226	2.538	0	11	51.289	9.344	0.842	3.113	297	1.615	0.619	0.914	0.0289436
781	NCS1_KAN360-8_2.tif:0002-0112	1.069	3.676	0	15	110.74	11.47	0.848	3.931	375	1.481	0.675	0.879	0.0365449
782	NCS1_KAN360-8_2.tif:0003-0120	1.059	2.861	0	14	81.891	12.274	0.929	3.029	289	1.23	0.813	0.931	0.0281639
783	NCS1_KAN360-8_2.tif:0004-0218	1.132	4.417	0	24	91.145	22.311	0.883	5	477	1.443	0.693	0.911	0.0464851
784	NCS1_KAN360-8_2.tif:0005-0277	1.426	3.301	0	22	27.518	28.402	0.93	4.706	449	1.402	0.713	0.922	0.0437564
785	NCS1_KAN360-8_2.tif:0006-0434	0.985	4.064	0	24	85.476	44.488	0.934	4.004	382	1.275	0.784	0.945	0.0372271
786	NCS1_KAN360-8_2.tif:0007-0515	0.912	4.184	0	19	137.228	52.721	0.938	3.815	364	1.015	0.985	0.941	0.0354729
787	NCS1_KAN360-8_2.tif:0008-0732	1.017	2.021	0	14	25.968	74.988	0.892	2.054	196	1.382	0.723	0.928	0.0191008
788	NCS1_KAN360-8_2.tif:0009-0830	1.132	2.065	0	11	91.65	85	0.921	2.337	223	1.352	0.739	0.939	0.021732
789	NCS1_KAN360-8_2.tif:0010-0840	1.426	3.25	0	20	72.23	85.999	0.858	4.633	442	1.776	0.563	0.925	0.0430743
790	NCS1_KAN360-8_2.tif:0011-0929	0.922	1.83	0	9	7.345	95.137	0.935	1.688	161	1.035	0.966	0.917	0.0156899
791	NCS1_KAN360-8_3.tif:0001-0096	1.101	4.429	0	33	118.759	9.88	0.924	4.874	465	1.293	0.774	0.925	0.0453157
792	NCS1_KAN360-8_3.tif:0002-0175	1.059	2.752	0	18	25.88	17.938	0.959	2.914	278	1.06	0.943	0.944	0.027092
793	NCS1_KAN360-8_3.tif:0003-0207	0.943	6.633	0	32	86.195	21.225	0.957	6.258	597	1.149	0.87	0.933	0.0581795
794	NCS1_KAN360-8_3.tif:0004-0460	1.132	2.593	0	14	130.019	47.119	0.962	2.935	280	1.225	0.816	0.96	0.0272869
795	NCS1_KAN360-8_3.tif:0005-0493	1.132	2.38	0	12	90.497	50.498	0.91	2.694	257	1.407	0.711	0.911	0.0250454
796	NCS1_KAN360-8_3.tif:0006-0535	1.017	7.175	0	90	35.271	54.86	0.827	7.295	696	1.194	0.837	0.874	0.0678274
797	NCS1_KAN360-8_3.tif:0007-0570	0.943	2.567	0	17	46.98	58.367	0.97	2.421	231	1.031	0.97	0.952	0.0225117
798	NCS1_KAN360-8_3.tif:0008-0606	1.101	3.714	0	18	113.568	62.05	0.924	4.088	390	1.132	0.884	0.921	0.0380067
799	NCS1_KAN360-8_3.tif:0009-0781	1.373	3.107	0	14	109.851	79.979	0.931	4.266	407	1.26	0.794	0.926	0.0396634
800	NCS1_KAN360-8_3.tif:0010-0795	1.069	2.529	0	13	54.434	81.466	0.926	2.704	258	1.322	0.756	0.915	0.0251429
801	NCS1_KAN360-8_3.tif:0011-0830	0.891	3.271	0	19	23.845	85.025	0.903	2.914	278	1.419	0.705	0.904	0.027092
802	NCS1_KAN360-8_3.tif:0012-0879	1.048	3.17	0	17	114.514	90.044	0.949	3.323	317	1.036	0.966	0.926	0.0308926
803	NCS1_KAN360-8_3.tif:0013-0977	1.101	2.705	0	15	59.052	100.061	0.928	2.977	284	1.192	0.839	0.882	0.0276767
804	NCS1_KAN360-8_3.tif:0014-1022	0.996	2.4	0	16	2.625	104.669	0.902	2.39	228	1.377	0.726	0.913	0.0222193
805	NCS1_KAN360-8_4.tif:0001-0033	1.059	2.693	0	15	123.238	3.421	0.851	2.851	272	1.394	0.717	0.898	0.0265072
806	NCS1_KAN360-8_4.tif:0002-0254	1.017	2.474	0	12	25.812	26.017	0.853	2.516	240	1.577	0.634	0.907	0.0233887
807	NCS1_KAN360-8_4.tif:0003-0274	0.922	2.511	0	12	61.527	28.09	0.968	2.316	221	1.16	0.862	0.926	0.0215371
808	NCS1_KAN360-8_4.tif:0004-0417	0.975	2.043	0	9	99.992	42.706	0.839	1.992	190	1.663	0.601	0.949	0.0185161
809	NCS1_KAN360-8_4.tif:0005-0436	0.849	2.025	0	10	32.502	44.682	0.917	1.719	164	1.08	0.926	0.964	0.0159823
810	NCS1_KAN360-8_4.tif:0006-0461	0.954	2.989	0	17	52.851	47.208	0.875	2.851	272	1.416	0.706	0.943	0.0265072
811	NCS1_KAN360-8_4.tif:0007-0576	1.006	6.958	0	45	24.75	59.02	0.911	7.002	668	1.517	0.659	0.937	0.0650987
812	NCS1_KAN360-8_4.tif:0008-0617	0.943	2.756	0	17	108.173	63.253	0.854	2.6	248	1.584	0.631	0.891	0.0241684
813	NCS1_KAN360-8_4.tif:0009-0733	0.975	4.14	0	36	86.167	75.072	0.988	4.036	385	1.128	0.886	0.949	0.0375194
814	NCS1_KAN360-8_4.tif:0010-0934	1.101	4.2	0	38	77.558	95.611	0.912	4.622	441	1.169	0.855	0.897	0.0429768
815	NCS1_KAN360-8_4.tif:0011-0961	1.08	9.835	0	68	138.186	98.395	0.978	10.618	1013	1.199	0.834	0.949	0.09872
816	NCS1_KAN360-8_5.tif:0001-0142	1.059	4.198	0	29	64.995	14.611	0.917	4.444	424	1.112	0.9	0.902	0.0413201
817	NCS1_KAN360-8_5.tif:0002-0239	1.551	3.561	0	30	114.079	24.352	0.672	5.524	527	1.477	0.677	0.798	0.0513578
818	NCS1_KAN360-8_5.tif:0003-0419	1.09	3.865	0	27	85.104	42.879	0.887	4.214	402	1.259	0.794	0.908	0.0391761
819	NCS1_KAN360-8_5.tif:0004-0508	1.122	8.028	0	52	51.675	52.012	0.849	9.004	859	1.547	0.646	0.911	0.0837122
820	NCS1_KAN360-8_5.tif:0005-0592	1.111	2.934	0	16	116.649	60.682	0.841	3.26	311	1.25	0.8	0.883	0.0303079
821	NCS1_KAN360-8_5.tif:0006-0683	1.457	2.367	0	10	131.807	69.932	0.815	3.449	329	1.399	0.715	0.848	0.0320621
822	NCS1_KAN360-8_5.tif:0007-0708	1.153	2.182	0	10	8.59	72.521	0.862	2.516	240	1.519	0.659	0.894	0.0233887
823	NCS1_KAN360-8_5.tif:0008-0790	1.163	3.378	0	29	82.258	80.84	0.845	3.931	375	1.23	0.813	0.877	0.0365449
824	NCS1_KAN360-8_5.tif:0009-0855	1.101	2.438	0	11	117.575	87.598	0.912	2.683	256	1.142	0.876	0.897	0.024948
825	NCS1_KAN360-8_6.tif:0001-0015	1.237	2.339	0	12	102.456	1.579	0.964	2.893	276	1.25	0.8	0.944	0.0268971
826	NCS1_KAN360-8_6.tif:0002-0176	1.394	3.301	0	18	65.621	18.082	0.862	4.602	439	1.328	0.753	0.893	0.0427819
827	NCS1_KAN360-8_6.tif:0003-0279	1.3	5.508	0	45	121.499	28.555	0.972	7.159	683	1.118	0.894	0.929	0.0665605
828	NCS1_KAN360-8_6.tif:0004-0280	1.027	2.031	0	10	93.938	28.629	0.93	2.086	199	1.252	0.799	0.929	0.0193932
829	NCS1_KAN360-8_6.tif:0005-0355	0.901	2.791	0	23	8.771	36.3	0.946	2.516	240	1.146	0.872	0.925	0.0233887
830	NCS1_KAN360-8_6.tif:0006-0391	1.122	2.215	0	10	33.697	40.057	0.901	2.484	237	1.276	0.784	0.907	0.0230964
831	NCS1_KAN360-8_6.tif:0007-0472	1.163	2.342	0	13	66.692	48.413	0.881	2.725	260	1.304	0.767	0.91	0.0253378
832	NCS1_KAN360-8_6.tif:0008-0594	1.174	2.143	0	11	97.755	60.823	0.899	2.516	240	1.223	0.818	0.945	0.0233887
833	NCS1_KAN360-8_6.tif:0009-0641	0.922	2.205	0	11	1.028	65.654	0.922	2.033	194	1.139	0.878	0.884	0.0189059
834	NCS1_KAN360-8_6.tif:0010-0715	1.09	2.913	0	15	68.226	73.248	0.944	3.176	303	1.12	0.892	0.92	0.0295283
835	NCS1_KAN360-8_6.tif:0011-0862	1.226	2.718	0	19	119.019	88.301	0.842	3.333	318	1.501	0.666	0.903	0.0309901
836	NCS1_KAN360-8_6.tif:0012-0884	0.975	2.075	0	12	29.36	90.535	0.943	2.023	193	1.218	0.821	0.921	0.0188084
837	NCS1_KAN360-8_6.tif:0013-0900	1.352	2.496	0	12	73.945	92.112	0.823	3.375	322	1.156	0.865	0.881	0.0313799
										347.923				0.0339062
														0
														0
														0
838	NCS1_KAN360-9_1.tif:0001-0088	1.174	12.527	0	64	84.42	9.018	0.853	14.706	1403	1.217	0.822	0.889	0.136727
839	NCS1_KAN360-9_1.tif:0002-0156	1.048	23.98	0	114	67.536	16.02	0.981	25.135	2398	1.072	0.933	0.93	0.233693
840	NCS1_KAN360-9_1.tif:0003-0178	1.048	6.81	0	46	30.722	18.26	0.907	7.138	681	1.247	0.802	0.901	0.0663656
841	NCS1_KAN360-9_1.tif:0004-0201	1.027	3.255	0	17	115.473	20.555	0.93	3.344	319	1.141	0.876	0.925	0.0310875
842	NCS1_KAN360-9_1.tif:0005-0389	1.132	4.472	0	31	97.58	39.874	0.95	5.063	483	1.525	0.656	0.943	0.0470698
843	NCS1_KAN360-9_1.tif:0006-0405	0.933	7.989	0	36	37.544	41.468	0.915	7.453	711	1.166	0.858	0.922	0.0692891
844	NCS1_KAN360-9_1.tif:0007-0502	1.132	12.481	0	48	131.657	51.446	0.95	14.13	1348	1.102	0.908	0.931	0.131367
845	NCS1_KAN360-9_1.tif:0008-0554	0.839	9.137	0	56	17.45	56.7	0.906	7.662	731	1.252	0.799	0.947	0.0712382
846	NCS1_KAN360-9_1.tif:0009-0702	1.101	10.638	0	79	111.315	71.908	0.884	11.708	1117	1.284	0.779	0.882	0.108855
847	NCS1_KAN360-9_1.tif:0010-0774	0.933	458.966	17	2397	13.354	79.25	0.829	428.163	40848	1.525	0.656	0.918	3.98076
848	NCS1_KAN360-9_1.tif:0011-0781	0.975	5.366	0	43	46.692	79.915	0.883	5.23	499	1.129	0.886	0.899	0.0486291
849	NCS1_KAN360-9_1.tif:0012-0786	1.038	13.576	0	71	137.776	80.483	0.984	14.088	1344	1.1	0.909	0.957	0.130977
850	NCS1_KAN360-9_1.tif:0013-0987	0.922	8.148	0	45	92.42	101.14	0.809	7.515	717	1.621	0.617	0.889	0.0698739
851	NCS1_KAN360-9_1.tif:0014-1029	0.964	12.63	0	68	123.853	105.349	0.914	12.18	1162	1.276	0.784	0.939	0.11324
852	NCS1_KAN360-9_2.tif:0001-0113	0.975	9.882	0	55	107.406	11.611	0.912	9.633	919	1.353	0.739	0.912	0.0895594
853	NCS1_KAN360-9_2.tif:0002-0128	1.268	13.264	0	74	60.817	13.131	0.895	16.823	1605	1.441	0.694	0.931	0.156412
854	NCS1_KAN360-9_2.tif:0003-0192	1.184	6.274	0	43	83.818	19.678	0.923	7.432	709	1.162	0.861	0.922	0.0690942
855	NCS1_KAN360-9_2.tif:0004-0201	1.059	36.267	0	167	134.066	20.609	0.9	38.395	3663	1.333	0.75	0.935	0.356971
856	NCS1_KAN360-9_2.tif:0005-0323	1.132	11.556	0	76	41.861	33.084	0.98	13.081	1248	1.147	0.872	0.943	0.121621
857	NCS1_KAN360-9_2.tif:0006-0481	1.153	15.282	0	93	102.92	49.274	0.837	17.62	1681	1.202	0.832	0.856	0.163819
858	NCS1_KAN360-9_2.tif:0007-0543	0.922	2.432	0	11	54.709	55.638	0.935	2.243	214	1.244	0.804	0.917	0.020855
859	NCS1_KAN360-9_2.tif:0008-0614	1.069	4.686	0	25	79.013	62.893	0.859	5.01	478	1.618	0.618	0.895	0.0465826
860	NCS1_KAN360-9_2.tif:0009-0627	0.88	13.583	0	50	1.559	64.188	0.937	11.96	1141	1.088	0.919	0.933	0.111194
861	NCS1_KAN360-9_2.tif:0010-0762	1.226	14.333	0	71	134.796	78.022	0.973	17.578	1677	1.117	0.895	0.925	0.163429
862	NCS1_KAN360-9_2.tif:0011-0838	1.226	8.453	0	64	106.186	85.842	0.851	10.367	989	1.578	0.634	0.94	0.0963811
863	NCS1_KAN360-9_2.tif:0012-0877	0.87	4.639	0	28	23.246	89.807	0.895	4.036	385	1.201	0.833	0.922	0.0375194
864	NCS1_KAN360-9_2.tif:0013-0895	0.985	10.362	0	104	75.481	91.661	0.953	10.209	974	1.169	0.855	0.913	0.0949193
865	NCS1_KAN360-9_2.tif:0014-0969	0.839	4.013	0	45	47.303	99.284	1	3.365	321	1.11	0.901	0.952	0.0312824
866	NCS1_KAN360-9_2.tif:0015-1010	0.964	14.467	0	99	72.67	103.444	0.945	13.951	1331	1.187	0.842	0.944	0.12971
867	NCS1_KAN360-9_3.tif:0001-0235	1.184	4.982	0	23	93.061	24.1	0.881	5.901	563	1.306	0.766	0.942	0.0548661
868	NCS1_KAN360-9_3.tif:0002-0251	0.891	26.6	0	117	18.376	25.713	0.935	23.699	2261	1.101	0.909	0.909	0.220341
869	NCS1_KAN360-9_3.tif:0003-0267	0.964	6.511	0	52	7.411	27.375	0.82	6.279	599	1.844	0.542	0.925	0.0583744
870	NCS1_KAN360-9_3.tif:0004-0295	0.891	5.588	0	50	38.917	30.268	0.873	4.979	475	1.159	0.863	0.895	0.0462902
871	NCS1_KAN360-9_3.tif:0005-0295	0.901	7.558	0	40	130.933	30.25	0.896	6.813	650	1.225	0.816	0.94	0.0633445
872	NCS1_KAN360-9_3.tif:0006-0297	0.86	15.195	0	80	62.466	30.353	0.948	13.06	1246	1.051	0.951	0.932	0.121427
873	NCS1_KAN360-9_3.tif:0007-0528	1.352	65.124	0	573	130.346	54.065	0.917	88.058	8401	1.36	0.735	0.921	0.818703
874	NCS1_KAN360-9_3.tif:0008-0592	1.038	4.293	0	42	66.739	60.655	0.984	4.455	425	1.125	0.889	0.961	0.0414176
875	NCS1_KAN360-9_3.tif:0009-0617	1.247	12.857	0	52	98.587	63.239	0.81	16.037	1530	1.668	0.6	0.905	0.149103
876	NCS1_KAN360-9_3.tif:0010-0994	1.247	8.992	0	73	65.383	101.83	0.846	11.216	1070	1.653	0.605	0.888	0.104275
877	NCS1_KAN360-9_4.tif:0001-0088	0.975	2.505	0	16	42.998	9.068	0.855	2.442	233	1.275	0.784	0.912	0.0227066
878	NCS1_KAN360-9_4.tif:0002-0088	0.954	12.978	0	76	130.688	9.019	0.967	12.379	1181	1.112	0.9	0.924	0.115092
879	NCS1_KAN360-9_4.tif:0003-0178	0.891	325.694	4	1933	32.135	18.211	1	290.18	27684	1.064	0.94	0.95	2.69789
880	NCS1_KAN360-9_4.tif:0004-0270	1.174	21.17	0	118	91.001	27.677	0.863	24.852	2371	1.727	0.579	0.933	0.231061
881	NCS1_KAN360-9_4.tif:0005-0316	0.954	17.604	0	79	24.456	32.333	0.935	16.792	1602	1.068	0.936	0.924	0.15612
882	NCS1_KAN360-9_4.tif:0006-0444	1.08	7.01	0	60	75.928	45.445	0.965	7.568	722	1.058	0.946	0.928	0.0703611
883	NCS1_KAN360-9_4.tif:0007-0453	0.849	220.975	0	567	123.13	46.36	0.917	187.615	17899	1.352	0.74	0.959	1.74431
884	NCS1_KAN360-9_4.tif:0008-0554	1.163	30.261	0	243	38.426	56.806	0.798	35.209	3359	1.657	0.603	0.888	0.327345
885	NCS1_KAN360-9_4.tif:0009-0600	1.038	13.212	0	66	91.701	61.422	0.99	13.71	1308	1.141	0.876	0.917	0.127469
886	NCS1_KAN360-9_4.tif:0010-0622	1.363	256.115	0	1567	27.668	63.764	0.722	348.993	33295	2.012	0.497	0.89	3.2447
887	NCS1_KAN360-9_4.tif:0011-0672	0.86	3	0	18	58.544	68.874	0.884	2.579	246	1.241	0.806	0.916	0.0239735
888	NCS1_KAN360-9_4.tif:0012-0747	0.975	372.742	0	2425	9.928	76.474	0.937	363.354	34665	1.177	0.85	0.974	3.37821
889	NCS1_KAN360-9_4.tif:0013-0759	0.839	318.788	12	1612	3.747	77.707	1	267.319	25503	1.09	0.918	0.952	2.48535
890	NCS1_KAN360-9_4.tif:0014-0787	0.849	12.667	0	71	53.418	80.562	1	10.754	1026	1.021	0.98	0.926	0.0999869
891	NCS1_KAN360-9_4.tif:0015-0871	0.839	3.975	0	37	117.311	89.208	0.959	3.333	318	1.173	0.852	0.925	0.0309901
892	NCS1_KAN360-9_4.tif:0016-0875	1.394	50.932	0	318	95.249	89.567	0.758	71.004	6774	1.681	0.595	0.896	0.660147
893	NCS1_KAN360-9_4.tif:0017-1032	1.258	324.35	11	2140	99.668	105.701	0.808	407.975	38922	1.858	0.538	0.886	3.79307
894	NCS1_KAN360-9_5.tif:0001-0129	1.174	4.884	0	27	74.866	13.245	0.955	5.734	547	1.12	0.893	0.949	0.0533068
895	NCS1_KAN360-9_5.tif:0002-0172	1.038	21.818	0	185	10.341	17.665	0.871	22.641	2160	1.403	0.713	0.908	0.210499
896	NCS1_KAN360-9_5.tif:0003-0186	1.247	22.471	0	107	71.174	19.072	0.906	28.028	2674	1.364	0.733	0.915	0.26059
897	NCS1_KAN360-9_5.tif:0004-0269	0.839	223.6	18	735	132.116	27.521	0.973	187.499	17888	1.247	0.802	0.964	1.74324
898	NCS1_KAN360-9_5.tif:0005-0302	0.839	256.2	0	1157	89.89	30.97	0.973	214.836	20496	1.106	0.904	0.952	1.9974
899	NCS1_KAN360-9_5.tif:0006-0400	1.258	12.333	0	72	70.956	41.018	0.952	15.513	1480	1.269	0.788	0.945	0.144231
900	NCS1_KAN360-9_5.tif:0007-0426	1.562	63.034	0	401	120.714	43.719	0.84	98.446	9392	1.467	0.682	0.92	0.915279
901	NCS1_KAN360-9_5.tif:0008-0484	0.891	12.365	0	79	3.202	49.536	0.891	11.016	1051	1.315	0.76	0.867	0.102423
902	NCS1_KAN360-9_5.tif:0009-0547	1.572	28.82	0	198	113.216	55.957	0.871	45.313	4323	1.27	0.788	0.89	0.42129
903	NCS1_KAN360-9_5.tif:0010-0560	0.996	26.411	0	95	39.395	57.359	0.944	26.299	2509	1.151	0.869	0.945	0.24451
904	NCS1_KAN360-9_5.tif:0011-0565	0.954	4.176	0	21	76.03	57.893	0.935	3.983	380	1.131	0.884	0.933	0.0370322
905	NCS1_KAN360-9_5.tif:0012-0574	0.86	21.329	0	133	24.061	58.842	0.884	18.333	1749	1.299	0.77	0.921	0.170445
906	NCS1_KAN360-9_5.tif:0013-0636	1.048	13.98	0	78	6.059	65.153	0.967	14.654	1398	1.099	0.91	0.922	0.136239
907	NCS1_KAN360-9_5.tif:0014-0753	0.975	282.022	9	985	55.742	77.088	0.988	274.918	26228	1.176	0.85	0.949	2.556
908	NCS1_KAN360-9_5.tif:0015-0822	0.954	2.22	0	12	73.777	84.126	0.967	2.117	202	1.127	0.887	0.929	0.0196855
909	NCS1_KAN360-9_6.tif:0001-0007	1.101	13.962	0	63	86.315	0.626	0.809	15.366	1466	1.356	0.738	0.894	0.142866
910	NCS1_KAN360-9_6.tif:0002-0020	0.933	264.73	27	1470	53.45	2.048	0.715	246.963	23561	1.972	0.507	0.856	2.29609
911	NCS1_KAN360-9_6.tif:0003-0097	1.017	6.268	0	56	33.161	9.91	0.921	6.373	608	1.213	0.825	0.933	0.0592515
912	NCS1_KAN360-9_6.tif:0004-0163	1.153	20.118	0	111	44	16.658	0.873	23.196	2213	1.384	0.723	0.917	0.215664
913	NCS1_KAN360-9_6.tif:0005-0234	1.174	30.321	0	212	65.069	23.975	0.915	35.596	3396	1.295	0.772	0.907	0.330951
914	NCS1_KAN360-9_6.tif:0006-0242	1.279	14.361	0	80	97.355	24.812	0.918	18.364	1752	1.234	0.811	0.91	0.170738
915	NCS1_KAN360-9_6.tif:0007-0249	1.017	3.608	0	31	13.88	25.532	0.803	3.669	350	1.702	0.587	0.882	0.0341086
916	NCS1_KAN360-9_6.tif:0008-0288	0.891	356.929	15	1439	50.185	29.528	0.916	318.009	30339	1.325	0.755	0.944	2.95663
917	NCS1_KAN360-9_6.tif:0009-0301	1.184	429.982	0	2964	27.921	30.894	0.8	509.293	48588	1.896	0.527	0.926	4.73505
918	NCS1_KAN360-9_6.tif:0010-0350	0.849	318.506	0	1655	60.911	35.874	0.95	270.421	25799	1.12	0.893	0.953	2.51419
919	NCS1_KAN360-9_6.tif:0011-0358	0.933	248.607	0	1266	106.256	36.723	0.724	231.922	22126	1.911	0.523	0.868	2.15625
920	NCS1_KAN360-9_6.tif:0012-0431	0.891	134.682	0	629	129.521	44.238	0.652	119.996	11448	2.577	0.388	0.895	1.11564
921	NCS1_KAN360-9_6.tif:0013-0517	0.975	197.602	0	804	128.285	52.903	0.734	192.625	18377	1.663	0.601	0.886	1.7909
922	NCS1_KAN360-9_6.tif:0014-0529	1.342	12.047	0	90	123.666	54.127	0.9	16.163	1542	1.125	0.889	0.895	0.150273
923	NCS1_KAN360-9_6.tif:0015-0585	1.027	3.398	0	19	27.746	59.959	0.974	3.49	333	1.144	0.874	0.956	0.0324519
924	NCS1_KAN360-9_6.tif:0016-0632	0.912	6.655	0	56	49.055	64.77	0.991	6.069	579	1.1	0.909	0.921	0.0564253
925	NCS1_KAN360-9_6.tif:0017-0633	1.069	3.882	0	25	84.452	64.838	0.955	4.151	396	1.122	0.891	0.911	0.0385914
926	NCS1_KAN360-9_6.tif:0018-0686	1.027	19.98	0	155	131.901	70.269	0.901	20.523	1958	1.215	0.823	0.925	0.190813
927	NCS1_KAN360-9_6.tif:0019-0756	1.352	25.426	0	167	103.446	77.41	0.836	34.38	3280	1.288	0.776	0.887	0.319646
928	NCS1_KAN360-9_6.tif:0020-0861	0.964	16.489	0	226	48.986	88.221	0.945	15.901	1517	1.078	0.928	0.939	0.147836
929	NCS1_KAN360-9_6.tif:0021-0955	1.017	7.99	0	49	138.066	97.76	0.921	8.123	775	1.273	0.786	0.919	0.0755261
930	NCS1_KAN360-9_6.tif:0022-1018	1.132	496.046	0	3646	134.776	104.21	0.654	561.545	53573	1.904	0.525	0.797	5.22085
										6794.38				0.662133
														0
														0
														0
1	NCS1_KAN360-10_1.tif:0001-0072	1.216	10.138	0	86	30.464	7.363	0.995	12.327	1176	1.107	0.903	0.924	0.114605
2	NCS1_KAN360-10_1.tif:0002-0182	1.384	52.879	0	297	93.143	18.664	0.878	73.163	6980	1.474	0.679	0.917	0.680223
3	NCS1_KAN360-10_1.tif:0003-0246	1.017	14.948	0	148	58.661	25.211	0.951	15.199	1450	1.187	0.842	0.919	0.141307
4	NCS1_KAN360-10_1.tif:0004-0292	1.384	18.591	0	126	38.74	29.901	0.846	25.722	2454	1.754	0.57	0.895	0.23915
5	NCS1_KAN360-10_1.tif:0005-0324	0.954	15.264	0	101	1.22	33.185	0.948	14.559	1389	1.221	0.819	0.968	0.135362
6	NCS1_KAN360-10_1.tif:0006-0350	1.006	32.948	0	143	91.373	35.799	0.954	33.154	3163	1.131	0.884	0.95	0.308244
7	NCS1_KAN360-10_1.tif:0007-0368	0.922	14.091	0	67	128.423	37.645	1	12.998	1240	1.127	0.888	0.926	0.120842
8	NCS1_KAN360-10_1.tif:0008-0519	1.184	4.991	0	41	47.042	53.051	0.721	5.912	564	1.875	0.533	0.859	0.0549635
9	NCS1_KAN360-10_1.tif:0009-0711	1.09	9.269	0	56	88.25	72.794	0.927	10.105	964	1.243	0.804	0.945	0.0939448
10	NCS1_KAN360-10_1.tif:0010-0717	1.048	17.82	0	150	66.218	73.448	0.842	18.679	1782	1.205	0.83	0.866	0.173661
11	NCS1_KAN360-10_1.tif:0011-1010	1.258	8.758	0	89	106.441	103.469	0.888	11.016	1051	1.31	0.763	0.913	0.102423
12	NCS1_KAN360-10_2.tif:0001-0079	1.101	15.286	0	81	49.431	8.055	0.965	16.823	1605	1.176	0.851	0.955	0.156412
13	NCS1_KAN360-10_2.tif:0002-0162	1.488	771.613	0	3608	97.431	16.64	0.982	1148.49	109569	1.094	0.914	0.953	10.6778
14	NCS1_KAN360-10_2.tif:0003-0191	0.912	361.069	0	2372	81.806	19.568	0.971	329.267	31413	1.066	0.938	0.946	3.06129
15	NCS1_KAN360-10_2.tif:0004-0210	1.205	11.661	0	79	89.33	21.46	0.886	14.056	1341	1.126	0.888	0.924	0.130685
16	NCS1_KAN360-10_2.tif:0005-0302	1.3	14.048	0	98	57.58	30.935	0.858	18.259	1742	1.487	0.672	0.905	0.169763
17	NCS1_KAN360-10_2.tif:0006-0383	1.027	24.939	0	164	130.031	39.221	0.961	25.618	2444	1.179	0.848	0.925	0.238175
18	NCS1_KAN360-10_2.tif:0007-0531	0.933	14.685	0	63	32.762	54.356	0.856	13.7	1307	1.221	0.819	0.918	0.127371
19	NCS1_KAN360-10_2.tif:0008-0605	1.174	8.491	0	71	68.759	61.989	0.889	9.968	951	1.424	0.702	0.918	0.0926779
20	NCS1_KAN360-10_2.tif:0009-0619	1.342	11.344	0	70	107.706	63.37	0.936	15.22	1452	1.191	0.84	0.914	0.141502
21	NCS1_KAN360-10_2.tif:0010-0678	0.975	36.968	0	173	35.34	69.465	0.975	36.037	3438	1.082	0.924	0.925	0.335044
22	NCS1_KAN360-10_2.tif:0011-0712	1.195	217.93	32	569	115.902	72.981	0.843	260.411	24844	1.615	0.619	0.905	2.42112
23	NCS1_KAN360-10_2.tif:0012-0814	1.08	7.631	0	50	82.667	83.411	0.935	8.239	786	1.266	0.79	0.92	0.0765981
24	NCS1_KAN360-10_2.tif:0013-0818	1.163	369.901	0	1573	90.817	83.796	1	430.375	41059	1.107	0.903	0.945	4.00133
25	NCS1_KAN360-10_2.tif:0014-0903	1.101	23.314	0	91	116.1	92.49	0.896	25.66	2448	1.634	0.612	0.938	0.238565
26	NCS1_KAN360-10_2.tif:0015-0974	0.891	20.024	0	83	8.562	99.733	0.935	17.84	1702	1.12	0.893	0.909	0.165865
27	NCS1_KAN360-10_2.tif:0016-1023	0.985	6.319	0	43	40.916	104.801	0.934	6.226	594	1.224	0.817	0.94	0.0578871
28	NCS1_KAN360-10_3.tif:0001-0038	0.891	470.165	6	2615	117.069	3.875	0.962	418.897	39964	1.137	0.88	0.977	3.89462
29	NCS1_KAN360-10_3.tif:0002-0071	0.933	7.371	0	31	19.94	7.256	0.902	6.876	656	1.308	0.765	0.89	0.0639292
30	NCS1_KAN360-10_3.tif:0003-0090	1.132	28.639	0	178	66.048	9.237	0.857	32.42	3093	1.091	0.916	0.896	0.301422
31	NCS1_KAN360-10_3.tif:0004-0137	1.08	29.631	0	117	105.029	13.985	0.89	31.991	3052	1.212	0.825	0.941	0.297427
32	NCS1_KAN360-10_3.tif:0005-0280	1.216	26.603	0	144	75.991	28.68	0.948	32.347	3086	1.185	0.844	0.924	0.30074
33	NCS1_KAN360-10_3.tif:0006-0313	1.101	10.343	0	88	122.268	32.104	0.884	11.383	1086	1.299	0.77	0.897	0.105834
34	NCS1_KAN360-10_3.tif:0007-0554	1.017	31.093	0	115	65.259	56.703	0.921	31.613	3016	1.197	0.835	0.915	0.293919
35	NCS1_KAN360-10_3.tif:0008-0574	1.059	36.089	0	368	102.744	58.779	0.917	38.206	3645	1.13	0.885	0.906	0.355217
36	NCS1_KAN360-10_3.tif:0009-0595	0.849	3.741	0	35	23.525	60.9	0.971	3.176	303	1.024	0.976	0.926	0.0295283
37	NCS1_KAN360-10_3.tif:0010-0712	1.048	12.73	0	115	118.564	72.857	0.919	13.343	1273	1.229	0.814	0.93	0.124058
38	NCS1_KAN360-10_3.tif:0011-0817	0.88	11.012	0	68	67.854	83.677	0.924	9.696	925	1.265	0.791	0.913	0.0901441
39	NCS1_KAN360-10_3.tif:0012-0851	1.247	24.555	0	83	123.68	87.195	0.906	30.628	2922	1.423	0.703	0.926	0.284758
40	NCS1_KAN360-10_3.tif:0013-0988	1.342	17.516	0	107	131.264	101.215	0.852	23.5	2242	1.618	0.618	0.905	0.21849
41	NCS1_KAN360-10_4.tif:0001-0027	0.964	2.946	0	25	99.281	2.834	0.885	2.841	271	1.321	0.757	0.934	0.0264098
42	NCS1_KAN360-10_4.tif:0002-0053	1.143	21.927	0	134	46.181	5.411	0.891	25.052	2390	1.439	0.695	0.901	0.232913
43	NCS1_KAN360-10_4.tif:0003-0234	1.247	2.622	0	13	86.136	23.954	0.961	3.27	312	1.138	0.879	0.919	0.0304054
44	NCS1_KAN360-10_4.tif:0004-0246	1.08	12.515	0	49	64.1	25.198	0.906	13.511	1289	1.313	0.761	0.907	0.125617
45	NCS1_KAN360-10_4.tif:0005-0398	1.048	2.75	0	17	118.488	40.735	0.88	2.883	275	1.446	0.692	0.917	0.0267996
46	NCS1_KAN360-10_4.tif:0006-0411	1.048	4.05	0	25	7.804	42.067	0.967	4.245	405	1.118	0.895	0.913	0.0394685
47	NCS1_KAN360-10_4.tif:0007-0435	1.027	5.469	0	25	30.667	44.635	0.901	5.618	536	1.469	0.681	0.933	0.0522349
48	NCS1_KAN360-10_4.tif:0008-0476	1.216	11.543	0	68	61.497	48.762	0.948	14.035	1339	1.186	0.843	0.935	0.13049
49	NCS1_KAN360-10_4.tif:0009-0578	1.153	12.291	0	77	107.137	59.242	0.955	14.171	1352	1.161	0.862	0.921	0.131757
50	NCS1_KAN360-10_4.tif:0010-0745	1.101	7.514	0	67	76.092	76.323	0.912	8.27	789	1.409	0.71	0.905	0.0768905
51	NCS1_KAN360-10_4.tif:0011-0801	1.069	10.549	0	48	42.864	82.071	1	11.278	1076	1.035	0.967	0.94	0.10486
52	NCS1_KAN360-10_4.tif:0012-0815	0.975	4.075	0	22	2.179	83.463	0.895	3.973	379	1.162	0.861	0.935	0.0369347
53	NCS1_KAN360-10_4.tif:0013-0817	0.86	312.854	0	1403	97.304	83.635	0.997	268.902	25654	1.091	0.916	0.959	2.50006
54	NCS1_KAN360-10_4.tif:0014-0895	1.101	11.552	0	124	127.293	91.663	0.833	12.714	1213	1.403	0.713	0.886	0.118211
55	NCS1_KAN360-10_4.tif:0015-0953	1.415	46.859	0	249	91.345	97.529	0.843	66.308	6326	1.37	0.73	0.888	0.616488
56	NCS1_KAN360-10_5.tif:0001-0082	1.101	7.01	0	58	40.208	8.482	0.924	7.715	736	1.155	0.865	0.925	0.0717255
57	NCS1_KAN360-10_5.tif:0002-0103	1.059	37.505	0	385	65.621	10.503	0.9	39.705	3788	1.24	0.806	0.94	0.369152
58	NCS1_KAN360-10_5.tif:0003-0153	1.027	39.949	0	272	91.593	15.781	0.93	41.036	3915	1.098	0.911	0.925	0.381529
59	NCS1_KAN360-10_5.tif:0004-0175	1.153	9.173	0	85	115.008	17.954	0.873	10.576	1009	1.415	0.707	0.917	0.0983302
60	NCS1_KAN360-10_5.tif:0005-0428	0.985	5.957	0	44	65.661	43.949	0.788	5.87	560	1.589	0.629	0.908	0.0545737
61	NCS1_KAN360-10_5.tif:0006-0438	0.849	11.395	0	52	36.001	44.892	0.936	9.675	923	1.322	0.757	0.931	0.0899492
62	NCS1_KAN360-10_5.tif:0007-0494	0.849	3.333	0	20	13.239	50.617	0.873	2.83	270	1.328	0.753	0.92	0.0263123
63	NCS1_KAN360-10_5.tif:0008-0510	0.964	47.283	0	300	130.224	52.286	0.914	45.596	4350	1.353	0.739	0.934	0.423921
64	NCS1_KAN360-10_5.tif:0009-0625	0.901	17.721	0	92	97.608	64.037	0.96	15.974	1524	1.241	0.806	0.945	0.148519
65	NCS1_KAN360-10_5.tif:0010-0751	1.153	12.418	0	54	138.67	76.87	0.899	14.318	1366	1.512	0.662	0.932	0.133121
66	NCS1_KAN360-10_5.tif:0011-0783	1.08	20.612	0	107	117.505	80.113	0.878	22.253	2123	1.356	0.738	0.916	0.206893
67	NCS1_KAN360-10_5.tif:0012-0974	0.87	15.205	0	61	61.63	99.725	0.926	13.228	1262	1.531	0.653	0.949	0.122986
68	NCS1_KAN360-10_5.tif:0013-0993	1.059	18.792	0	103	140.507	101.684	0.946	19.895	1898	1.144	0.874	0.918	0.184966
69	NCS1_KAN360-10_6.tif:0001-0194	0.996	7.737	0	69	92.554	19.879	0.885	7.704	735	1.221	0.819	0.941	0.071628
70	NCS1_KAN360-10_6.tif:0002-0219	0.912	10.034	0	68	37.193	22.474	0.938	9.151	873	1.177	0.85	0.946	0.0850765
71	NCS1_KAN360-10_6.tif:0003-0294	1.038	2.717	0	12	54.205	30.15	0.871	2.82	269	1.541	0.649	0.908	0.0262149
72	NCS1_KAN360-10_6.tif:0004-0361	1.321	8.19	0	91	75.072	36.914	0.932	10.817	1032	1.202	0.832	0.93	0.100572
73	NCS1_KAN360-10_6.tif:0005-0451	1.143	66.578	0	319	116.459	46.194	0.918	76.067	7257	1.142	0.876	0.908	0.707217
74	NCS1_KAN360-10_6.tif:0006-0571	1.038	9.323	0	86	20.887	58.465	0.94	9.675	923	1.178	0.849	0.93	0.0899492
75	NCS1_KAN360-10_6.tif:0007-0667	1.216	10.267	0	125	107.736	68.395	0.834	12.484	1191	1.061	0.943	0.899	0.116067
76	NCS1_KAN360-10_6.tif:0008-0717	0.891	4.647	0	25	80.713	73.445	0.833	4.14	395	1.454	0.688	0.876	0.038494
77	NCS1_KAN360-10_6.tif:0009-0807	1.017	2.175	0	9	38.064	82.705	0.964	2.212	211	1.086	0.921	0.96	0.0205626
78	NCS1_KAN360-10_6.tif:0010-0900	1.174	17.232	0	270	123.032	92.199	0.955	20.23	1930	1.167	0.857	0.937	0.188084
79	NCS1_KAN360-10_6.tif:0011-0983	1.143	6.596	0	59	73.639	100.677	0.784	7.536	719	1.483	0.674	0.862	0.0700688
										5025.77				0.489777
														0
														0
														0
80	NCS1_KAN360-11_1.tif:0001-0177	1.268	3.934	0	68	81.115	18.138	0.87	4.989	476	1.262	0.793	0.913	0.0463877
81	NCS1_KAN360-11_1.tif:0002-0187	1.174	2.58	0	14	39.812	19.094	0.848	3.029	289	1.616	0.619	0.966	0.0281639
82	NCS1_KAN360-11_1.tif:0003-0374	1.006	2.792	0	15	124.194	38.333	0.911	2.809	268	1.55	0.645	0.923	0.0261174
83	NCS1_KAN360-11_1.tif:0004-0441	1.216	2.138	0	11	84.75	45.172	0.965	2.6	248	1.252	0.799	0.921	0.0241684
84	NCS1_KAN360-11_1.tif:0005-0543	0.912	2.77	0	15	21.951	55.628	0.938	2.526	241	1.198	0.835	0.946	0.0234862
85	NCS1_KAN360-11_1.tif:0006-0572	1.122	3.346	0	17	123.812	58.589	0.874	3.753	358	1.279	0.782	0.895	0.0348882
86	NCS1_KAN360-11_1.tif:0007-0645	0.985	2.947	0	15	80.776	66.051	0.922	2.903	277	1.216	0.822	0.904	0.0269945
87	NCS1_KAN360-11_1.tif:0008-0709	0.86	3.012	0	12	114.61	72.594	0.983	2.589	247	1.268	0.789	0.937	0.0240709
88	NCS1_KAN360-11_1.tif:0009-0754	1.059	2.149	0	13	46.997	77.301	0.946	2.275	217	1.178	0.849	0.918	0.0211473
89	NCS1_KAN360-11_1.tif:0010-0902	0.86	2.195	0	13	125.99	92.368	0.902	1.887	180	1.167	0.857	0.896	0.0175416
90	NCS1_KAN360-11_1.tif:0011-0934	0.891	2.553	0	11	62.613	95.685	0.949	2.275	217	1.266	0.79	0.939	0.0211473
91	NCS1_KAN360-11_1.tif:0012-1023	0.88	2.369	0	20	23.439	104.716	0.824	2.086	199	1.676	0.597	0.875	0.0193932
92	NCS1_KAN360-11_2.tif:0001-0086	1.184	2.673	0	14	107.134	8.861	0.981	3.166	302	1.14	0.877	0.93	0.0294308
93	NCS1_KAN360-11_2.tif:0002-0163	1.174	3.241	0	17	88.474	16.668	0.973	3.805	363	1.046	0.956	0.922	0.0353755
94	NCS1_KAN360-11_2.tif:0003-0221	1.3	2.621	0	12	51.081	22.739	0.907	3.407	325	1.372	0.729	0.922	0.0316723
95	NCS1_KAN360-11_2.tif:0004-0232	1.184	2.522	0	12	33.145	23.713	0.908	2.987	285	1.123	0.89	0.946	0.0277741
96	NCS1_KAN360-11_2.tif:0005-0403	1.436	3.518	0	59	122.212	41.27	0.855	5.052	482	1.465	0.683	0.91	0.0469724
97	NCS1_KAN360-11_2.tif:0006-0474	1.006	2.656	0	14	22.786	48.564	0.941	2.673	255	1.392	0.718	0.937	0.0248505
98	NCS1_KAN360-11_2.tif:0007-0585	1.321	3.056	0	15	110.25	59.838	0.795	4.036	385	1.141	0.876	0.86	0.0375194
99	NCS1_KAN360-11_2.tif:0008-0616	1.289	2.951	0	14	74.927	63.063	0.936	3.805	363	1.193	0.838	0.935	0.0353755
100	NCS1_KAN360-11_2.tif:0009-0630	0.964	2.337	0	12	30.576	64.461	0.945	2.254	215	1.312	0.762	0.944	0.0209524
101	NCS1_KAN360-11_2.tif:0010-0836	1.006	2.219	0	13	12.785	85.59	0.954	2.233	213	1.166	0.858	0.955	0.0207575
102	NCS1_KAN360-11_2.tif:0011-0873	1.143	3.33	0	20	90.826	89.369	0.971	3.805	363	1.183	0.845	0.965	0.0353755
103	NCS1_KAN360-11_2.tif:0012-0938	1.101	2.61	0	15	65.989	96.069	0.884	2.872	274	1.316	0.76	0.901	0.0267021
104	NCS1_KAN360-11_2.tif:0013-0999	1.038	3.333	0	21	139.531	102.254	0.971	3.459	330	1.218	0.821	0.938	0.0321595
105	NCS1_KAN360-11_3.tif:0001-0082	1.101	2.448	0	12	33.115	8.419	0.896	2.694	257	1.335	0.749	0.929	0.0250454
106	NCS1_KAN360-11_3.tif:0002-0205	1.289	3.447	0	19	64.192	21.028	0.936	4.444	424	1.265	0.79	0.928	0.0413201
107	NCS1_KAN360-11_3.tif:0003-0225	1.226	2.607	0	15	105.468	23.09	0.866	3.197	305	1.392	0.719	0.911	0.0297232
108	NCS1_KAN360-11_3.tif:0004-0281	1.122	2.047	0	10	134.863	28.838	0.953	2.296	219	1.085	0.922	0.951	0.0213422
109	NCS1_KAN360-11_3.tif:0005-0323	1.226	2.12	0	12	68.446	33.06	0.891	2.6	248	1.483	0.674	0.914	0.0241684
110	NCS1_KAN360-11_3.tif:0006-0338	0.912	1.92	0	14	17.911	34.623	0.925	1.75	167	1.319	0.758	0.93	0.0162747
111	NCS1_KAN360-11_3.tif:0007-0482	1.08	5.155	0	49	83.527	49.379	0.89	5.566	531	1.361	0.735	0.941	0.0517476
112	NCS1_KAN360-11_3.tif:0008-0490	0.86	2.293	0	12	19.677	50.173	0.948	1.971	188	1.128	0.887	0.916	0.0183212
113	NCS1_KAN360-11_3.tif:0009-0523	1.195	4.263	0	30	109.406	53.545	0.889	5.094	486	1.567	0.638	0.958	0.0473622
114	NCS1_KAN360-11_3.tif:0010-0657	0.922	5.682	0	88	33.376	67.295	0.954	5.241	500	1.028	0.973	0.898	0.0487265
115	NCS1_KAN360-11_3.tif:0011-0707	0.954	2.571	0	13	64.457	72.387	0.935	2.453	234	1.163	0.86	0.938	0.022804
116	NCS1_KAN360-11_3.tif:0012-0710	1.027	2.99	0	18	131.713	72.766	0.93	3.071	293	1.031	0.97	0.925	0.0285538
117	NCS1_KAN360-11_3.tif:0013-0758	1.038	2.949	0	13	93.763	77.653	0.898	3.061	292	1.569	0.637	0.921	0.0284563
118	NCS1_KAN360-11_3.tif:0014-0830	0.933	3.438	0	13	126.973	84.978	0.915	3.207	306	1.381	0.724	0.927	0.0298206
119	NCS1_KAN360-11_3.tif:0015-0903	0.943	7.144	0	89	60.07	92.474	0.99	6.74	643	1.152	0.868	0.928	0.0626623
120	NCS1_KAN360-11_3.tif:0016-0949	0.88	2.976	0	17	90.443	97.173	0.911	2.62	250	1.354	0.739	0.894	0.0243633
121	NCS1_KAN360-11_4.tif:0001-0048	1.153	4.209	0	30	61.663	4.971	0.873	4.853	463	1.538	0.65	0.905	0.0451208
122	NCS1_KAN360-11_4.tif:0002-0070	0.88	2.31	0	12	104.699	7.212	0.937	2.033	194	1.165	0.858	0.933	0.0189059
123	NCS1_KAN360-11_4.tif:0003-0110	1.321	3.365	0	18	45.305	11.272	0.871	4.444	424	1.396	0.716	0.913	0.0413201
124	NCS1_KAN360-11_4.tif:0004-0156	1.153	2.436	0	12	134.467	15.967	0.926	2.809	268	1.265	0.791	0.924	0.0261174
125	NCS1_KAN360-11_4.tif:0005-0229	0.975	2.247	0	10	18.396	23.477	0.912	2.191	209	1.135	0.881	0.912	0.0203677
126	NCS1_KAN360-11_4.tif:0006-0347	1.101	5.324	0	43	78.245	35.535	0.924	5.859	559	1.135	0.881	0.921	0.0544763
127	NCS1_KAN360-11_4.tif:0007-0451	0.996	2.211	0	11	45.777	46.265	0.996	2.201	210	1.006	0.994	0.931	0.0204651
128	NCS1_KAN360-11_4.tif:0008-0470	1.09	2.577	0	15	122.249	48.159	0.927	2.809	268	1.272	0.786	0.945	0.0261174
129	NCS1_KAN360-11_4.tif:0009-0611	1.279	13.197	0	97	110.952	62.562	0.867	16.876	1610	1.288	0.776	0.878	0.156899
130	NCS1_KAN360-11_4.tif:0010-0666	1.069	2.569	0	11	60.224	68.177	0.87	2.746	262	1.261	0.793	0.899	0.0255327
131	NCS1_KAN360-11_4.tif:0011-0709	0.985	2.947	0	22	93.056	72.622	0.934	2.903	277	1.098	0.91	0.935	0.0269945
132	NCS1_KAN360-11_4.tif:0012-0877	0.88	5.726	0	26	49.154	89.804	1	5.042	481	1.035	0.966	0.933	0.0468749
133	NCS1_KAN360-11_4.tif:0013-0960	0.839	4.737	0	26	11.526	98.227	0.822	3.973	379	1.657	0.604	0.899	0.0369347
134	NCS1_KAN360-11_4.tif:0014-0978	1.268	3.207	0	38	103.356	100.197	0.932	4.067	388	1.159	0.863	0.942	0.0378118
135	NCS1_KAN360-11_4.tif:0015-1012	1.163	3.45	0	17	43.285	103.59	0.87	4.015	383	1.312	0.762	0.892	0.0373245
136	NCS1_KAN360-11_5.tif:0001-0136	0.933	2.494	0	12	21.832	13.947	0.946	2.327	222	1.111	0.9	0.918	0.0216346
137	NCS1_KAN360-11_5.tif:0002-0153	1.101	2.39	0	19	104.33	15.737	0.896	2.631	251	1.589	0.629	0.929	0.0244607
138	NCS1_KAN360-11_5.tif:0003-0157	1.059	4.238	0	47	140.514	16.086	0.846	4.486	428	1.138	0.879	0.931	0.0417099
139	NCS1_KAN360-11_5.tif:0004-0210	1.111	3.245	0	13	72.477	21.597	0.904	3.606	344	1.146	0.873	0.922	0.0335239
140	NCS1_KAN360-11_5.tif:0005-0263	1.027	3.071	0	18	140.927	26.919	0.93	3.155	301	1.204	0.83	0.933	0.0293334
141	NCS1_KAN360-11_5.tif:0006-0386	1.09	2.337	0	13	98.742	39.59	0.898	2.547	243	1.093	0.915	0.929	0.0236811
142	NCS1_KAN360-11_5.tif:0007-0397	0.964	3.25	0	14	33.405	40.617	0.902	3.134	299	1.209	0.827	0.911	0.0291385
143	NCS1_KAN360-11_5.tif:0008-0625	0.954	4.341	0	22	126.519	64.035	0.967	4.14	395	1.134	0.882	0.938	0.038494
144	NCS1_KAN360-11_5.tif:0009-0654	1.006	1.812	0	8	88.509	66.911	0.941	1.824	174	1.34	0.746	0.941	0.0169568
145	NCS1_KAN360-11_5.tif:0010-0823	1.216	2.759	0	11	123.118	84.222	0.834	3.354	320	1.463	0.684	0.889	0.031185
146	NCS1_KAN360-11_5.tif:0011-0821	0.849	4.333	0	23	80.606	84.103	0.936	3.679	351	1.232	0.812	0.926	0.034206
147	NCS1_KAN360-11_5.tif:0012-0834	1.143	2.569	0	11	48.284	85.404	0.83	2.935	280	1.731	0.578	0.89	0.0272869
148	NCS1_KAN360-11_5.tif:0013-0942	0.839	2.7	0	14	9.136	96.447	0.925	2.264	216	1.186	0.843	0.914	0.0210499
149	NCS1_KAN360-11_5.tif:0014-0986	1.143	2.514	0	17	121.001	100.937	0.918	2.872	274	1.095	0.913	0.901	0.0267021
150	NCS1_KAN360-11_6.tif:0001-0060	1.048	2.51	0	12	58.618	6.164	0.967	2.631	251	1.117	0.895	0.922	0.0244607
151	NCS1_KAN360-11_6.tif:0002-0068	1.101	4.048	0	22	136.761	6.987	0.953	4.455	425	1.344	0.744	0.929	0.0414176
152	NCS1_KAN360-11_6.tif:0003-0098	1.017	3.268	0	16	119.741	10.126	0.897	3.323	317	1.187	0.842	0.878	0.0308926
153	NCS1_KAN360-11_6.tif:0004-0119	1.122	2.71	0	14	98.05	12.2	0.864	3.04	290	1.691	0.591	0.899	0.0282614
154	NCS1_KAN360-11_6.tif:0005-0139	0.891	2.882	0	12	31.28	14.265	0.807	2.568	245	1.356	0.737	0.854	0.023876
155	NCS1_KAN360-11_6.tif:0006-0213	0.901	2.977	0	12	16.281	21.81	1	2.683	256	1.038	0.963	0.945	0.024948
156	NCS1_KAN360-11_6.tif:0007-0298	1.352	2.403	0	11	123.905	30.553	0.858	3.249	310	1.302	0.768	0.893	0.0302105
157	NCS1_KAN360-11_6.tif:0008-0343	1.069	4.971	0	42	66.339	35.202	0.881	5.314	507	1.514	0.66	0.944	0.0494087
158	NCS1_KAN360-11_6.tif:0009-0572	0.901	2.93	0	11	104.824	58.563	0.994	2.641	252	1.146	0.872	0.945	0.0245582
159	NCS1_KAN360-11_6.tif:0010-0592	1.153	2.591	0	14	91.144	60.734	0.823	2.987	285	1.157	0.864	0.891	0.0277741
160	NCS1_KAN360-11_6.tif:0011-0751	1.174	3.786	0	28	120.581	76.915	0.955	4.444	424	1.32	0.758	0.957	0.0413201
161	NCS1_KAN360-11_6.tif:0012-0827	1.069	3.961	0	21	89.107	84.671	0.926	4.235	404	1.111	0.9	0.915	0.039371
162	NCS1_KAN360-11_6.tif:0013-0899	1.006	2.312	0	13	31.208	92.016	0.941	2.327	222	1.183	0.845	0.923	0.0216346
163	NCS1_KAN360-11_6.tif:0014-0954	0.849	2.506	0	12	83.428	97.654	1	2.128	203	1.023	0.978	0.926	0.019783
164	NCS1_KAN360-11_6.tif:0015-1017	1.101	3.448	0	25	63.506	104.186	0.953	3.794	362	1.114	0.898	0.925	0.035278
										328.718				0.0320346
														0
														0
														0
165	NCS1_KAN360-12_1.tif:0001-0011	0.975	65.441	0	272	86.479	1.209	0.924	63.793	6086	1.141	0.876	0.93	0.5931
166	NCS1_KAN360-12_1.tif:0002-0109	0.86	104.549	0	476	9.363	11.204	0.854	89.861	8573	1.56	0.641	0.927	0.835465
167	NCS1_KAN360-12_1.tif:0003-0125	0.996	54.484	0	285	51.234	12.778	0.919	54.254	5176	1.32	0.758	0.9	0.504417
168	NCS1_KAN360-12_1.tif:0004-0146	0.912	66.954	0	196	80.467	14.936	0.877	61.057	5825	1.475	0.678	0.956	0.567664
169	NCS1_KAN360-12_1.tif:0005-0314	1.174	71.277	0	391	80.453	32.19	0.927	83.677	7983	1.142	0.875	0.941	0.777968
170	NCS1_KAN360-12_1.tif:0006-0410	1.111	86.274	0	604	38.131	41.951	0.932	95.857	9145	1.319	0.758	0.938	0.891209
171	NCS1_KAN360-12_1.tif:0007-0458	1.436	151.599	0	873	123.74	46.979	0.912	217.698	20769	1.325	0.755	0.926	2.024
172	NCS1_KAN360-12_1.tif:0008-0490	0.901	31.349	0	116	4.851	50.161	0.946	28.259	2696	1.255	0.797	0.91	0.262734
173	NCS1_KAN360-12_1.tif:0009-0506	1.184	121.212	0	662	102.941	51.829	0.923	143.57	13697	1.372	0.729	0.911	1.33481
174	NCS1_KAN360-12_1.tif:0010-0614	1.122	77.383	0	544	65.142	62.925	0.953	86.79	8280	1.152	0.868	0.955	0.806912
175	NCS1_KAN360-12_1.tif:0011-0634	1.237	174.864	0	871	123.583	64.899	0.964	216.283	20634	1.01	0.99	0.937	2.01085
176	NCS1_KAN360-12_1.tif:0012-0763	1.069	81.451	0	396	117.125	78.101	0.926	87.083	8308	1.143	0.875	0.919	0.80964
177	NCS1_KAN360-12_1.tif:0013-0838	0.964	90.88	0	455	37.212	85.796	0.978	87.639	8361	1.158	0.863	0.925	0.814805
178	NCS1_KAN360-12_1.tif:0014-0843	1.216	87.224	0	510	79.863	86.303	0.868	106.055	10118	1.393	0.718	0.921	0.98603
179	NCS1_KAN360-12_1.tif:0015-1016	1.027	76.673	0	380	57.003	104.063	0.901	78.761	7514	1.248	0.801	0.92	0.732263
180	NCS1_KAN360-12_2.tif:0001-0028	0.975	70.441	0	316	18.109	2.928	0.895	68.667	6551	1.207	0.829	0.925	0.638415
181	NCS1_KAN360-12_2.tif:0002-0229	1.237	83.805	0	499	117.179	23.476	0.936	103.655	9889	1.389	0.72	0.94	0.963714
182	NCS1_KAN360-12_2.tif:0003-0248	1.153	134.845	0	649	132.664	25.449	0.967	155.477	14833	1.204	0.83	0.936	1.44552
183	NCS1_KAN360-12_2.tif:0004-0322	1.3	85.121	0	524	90.419	33.009	0.882	110.636	10555	1.031	0.97	0.905	1.02862
184	NCS1_KAN360-12_2.tif:0005-0352	1.08	94.961	0	583	57.788	35.986	0.906	102.523	9781	1.212	0.825	0.916	0.953189
185	NCS1_KAN360-12_2.tif:0006-0434	1.216	111.457	0	734	101.184	44.424	0.905	135.52	12929	1.252	0.799	0.955	1.25997
186	NCS1_KAN360-12_2.tif:0007-0527	1.006	55.062	0	300	29.025	53.963	0.954	55.407	5286	1.322	0.756	0.955	0.515137
187	NCS1_KAN360-12_2.tif:0008-0591	0.87	235.614	0	1114	96.947	60.504	0.759	204.983	19556	2.328	0.43	0.994	1.90579
188	NCS1_KAN360-12_2.tif:0009-0755	0.933	105.281	0	620	111.136	77.317	0.793	98.215	9370	1.863	0.537	0.89	0.913135
189	NCS1_KAN360-12_2.tif:0010-0803	0.86	236.756	7	737	78.311	82.183	0.948	203.495	19414	1.076	0.93	0.921	1.89195
190	NCS1_KAN360-12_2.tif:0011-0806	1.289	82.976	0	551	76.269	82.53	0.899	106.978	10206	1.521	0.657	0.918	0.994606
191	NCS1_KAN360-12_2.tif:0012-0809	1.268	83.083	0	504	139.461	82.849	0.895	105.374	10053	1.191	0.839	0.913	0.979696
192	NCS1_KAN360-12_2.tif:0013-0910	1.143	96.358	0	545	112.412	93.163	0.942	110.091	10503	1.213	0.824	0.96	1.02355
193	NCS1_KAN360-12_2.tif:0014-0937	1.08	44.796	0	301	23.769	95.937	0.867	48.363	4614	1.392	0.719	0.892	0.449649
194	NCS1_KAN360-12_3.tif:0001-0188	1.373	88.313	0	494	34.235	19.355	0.814	121.265	11569	1.282	0.78	0.894	1.12743
195	NCS1_KAN360-12_3.tif:0002-0216	1.268	67.537	0	366	56.781	22.053	0.87	85.658	8172	1.315	0.761	0.91	0.796387
196	NCS1_KAN360-12_3.tif:0003-0231	0.839	98.237	0	372	73.893	23.727	0.939	82.377	7859	1.125	0.889	0.947	0.765884
197	NCS1_KAN360-12_3.tif:0004-0289	1.101	123.19	0	645	17.791	29.685	0.869	135.583	12935	1.23	0.813	0.905	1.26056
198	NCS1_KAN360-12_3.tif:0005-0323	1.31	92.296	0	467	96.433	33.109	0.889	120.929	11537	1.251	0.8	0.899	1.12432
199	NCS1_KAN360-12_3.tif:0006-0463	1.446	131.319	0	741	114.498	47.391	0.839	189.952	18122	1.505	0.664	0.893	1.76604
200	NCS1_KAN360-12_3.tif:0007-0601	0.964	78.717	0	297	36.934	61.474	0.885	75.91	7242	1.213	0.824	0.939	0.705755
201	NCS1_KAN360-12_3.tif:0008-0705	1.31	240.232	0	1044	117.334	72.231	0.899	314.76	30029	1.528	0.654	0.94	2.92642
202	NCS1_KAN360-12_3.tif:0009-0825	1.069	87.265	0	329	77.996	84.484	0.87	93.299	8901	1.407	0.711	0.911	0.86743
203	NCS1_KAN360-12_3.tif:0010-0894	1.74	154.211	0	1057	100.941	91.507	0.73	268.325	25599	1.785	0.56	0.851	2.4947
204	NCS1_KAN360-12_3.tif:0011-0943	1.059	110.099	0	478	121.448	96.575	0.769	116.558	11120	1.842	0.543	0.852	1.08368
205	NCS1_KAN360-12_3.tif:0012-0953	0.86	88.78	0	368	48.893	97.589	0.962	76.308	7280	1.109	0.902	0.959	0.709458
206	NCS1_KAN360-12_4.tif:0001-0104	1.373	116.26	0	951	37.995	10.61	0.882	159.639	15230	1.253	0.798	0.919	1.48421
207	NCS1_KAN360-12_4.tif:0002-0263	1.017	67.701	0	514	35.297	26.964	0.921	68.834	6567	1.091	0.917	0.915	0.639974
208	NCS1_KAN360-12_4.tif:0003-0276	1.509	93.993	0	758	85.033	28.344	0.832	141.872	13535	1.421	0.704	0.9	1.31903
209	NCS1_KAN360-12_4.tif:0004-0325	1.006	31.906	0	296	3.385	33.244	0.941	32.106	3063	1.24	0.807	0.923	0.298499
210	NCS1_KAN360-12_4.tif:0005-0365	1.132	123.444	0	745	121.147	37.416	0.98	139.744	13332	1.097	0.912	0.931	1.29924
211	NCS1_KAN360-12_4.tif:0006-0427	1.006	39.406	0	300	47.446	43.718	0.973	39.653	3783	1.046	0.956	0.928	0.368665
212	NCS1_KAN360-12_4.tif:0007-0573	0.975	104.591	0	520	90.203	58.701	0.924	101.957	9727	1.235	0.809	0.939	0.947926
213	NCS1_KAN360-12_4.tif:0008-0595	1.279	70.951	0	409	121.628	60.911	0.913	90.731	8656	1.094	0.914	0.935	0.843554
214	NCS1_KAN360-12_4.tif:0009-0800	1.122	126.486	0	693	39.718	81.891	0.941	141.861	13534	1.227	0.815	0.926	1.31893
215	NCS1_KAN360-12_4.tif:0010-0807	1.53	107.925	0	822	118.958	82.666	0.795	165.163	15757	1.585	0.631	0.872	1.53557
216	NCS1_KAN360-12_5.tif:0001-0088	1.226	98.53	0	481	111.212	9.008	0.891	120.835	11528	1.271	0.787	0.921	1.12344
217	NCS1_KAN360-12_5.tif:0002-0106	1.017	73.629	0	281	73.765	10.897	0.938	74.861	7142	1.262	0.792	0.907	0.69601
218	NCS1_KAN360-12_5.tif:0003-0112	0.943	80.756	0	505	124.895	11.552	0.912	76.182	7268	1.048	0.954	0.905	0.708289
219	NCS1_KAN360-12_5.tif:0004-0431	1.059	77.119	0	371	82.182	44.175	0.99	81.643	7789	1.031	0.969	0.944	0.759062
220	NCS1_KAN360-12_5.tif:0005-0445	0.943	114.144	0	558	53.906	45.602	0.943	107.68	10273	1.467	0.681	0.914	1.00114
221	NCS1_KAN360-12_5.tif:0006-0637	1.289	121.016	0	857	110.09	65.2	0.86	156.022	14885	1.284	0.779	0.911	1.45059
222	NCS1_KAN360-12_5.tif:0007-0780	1.247	63.513	0	474	57.449	79.883	0.933	79.222	7558	1.137	0.879	0.915	0.73655
223	NCS1_KAN360-12_5.tif:0008-0828	1.384	87.667	0	590	115.146	84.75	0.865	121.296	11572	1.475	0.678	0.917	1.12773
224	NCS1_KAN360-12_5.tif:0009-0874	1.122	55.916	0	380	22.695	89.507	0.864	62.713	5983	1.253	0.798	0.863	0.583062
225	NCS1_KAN360-12_6.tif:0001-0131	1.426	100.235	0	734	107.173	13.459	0.881	142.889	13632	1.391	0.719	0.901	1.32848
226	NCS1_KAN360-12_6.tif:0002-0134	0.839	75.112	1	283	25.001	13.782	0.959	62.985	6009	1.273	0.785	0.92	0.585596
227	NCS1_KAN360-12_6.tif:0003-0290	1.331	91.693	0	437	70.306	29.736	0.878	122.061	11645	1.563	0.64	0.91	1.13484
228	NCS1_KAN360-12_6.tif:0004-0456	0.954	77.989	0	348	50.546	46.7	0.837	74.39	7097	1.017	0.983	0.875	0.691625
229	NCS1_KAN360-12_6.tif:0005-0464	1.101	76.61	0	331	104.981	47.512	0.884	84.316	8044	1.401	0.714	0.901	0.783913
230	NCS1_KAN360-12_6.tif:0006-0547	1.163	107.018	0	663	128.131	56.023	0.907	124.514	11879	1.489	0.672	0.933	1.15765
231	NCS1_KAN360-12_6.tif:0007-0557	1.111	93.802	0	463	87.146	57.126	0.866	104.221	9943	1.222	0.819	0.895	0.968976
232	NCS1_KAN360-12_6.tif:0008-0585	1.132	50.046	0	268	29.285	59.921	0.91	56.654	5405	1.304	0.767	0.904	0.526734
233	NCS1_KAN360-12_6.tif:0009-0631	0.975	48.839	0	236	57.85	64.612	0.912	47.609	4542	1.235	0.81	0.907	0.442632
234	NCS1_KAN360-12_6.tif:0010-0785	0.849	43.716	0	202	5.465	80.36	0.861	37.116	3541	1.355	0.738	0.895	0.345081
235	NCS1_KAN360-12_6.tif:0011-0789	1.006	121.948	0	641	91.385	80.795	0.911	122.711	11707	1.242	0.805	0.914	1.14088
236	NCS1_KAN360-12_6.tif:0012-1022	1.017	11.557	0	65	54.09	104.708	0.951	11.75	1121	1.147	0.872	0.919	0.109245
										10261.3				1

## Sheet: IF condition
Exp. number	Cell line	Gene induced	Culture condition, fixation condition	rabbit-Alexa488	Mouse IgG1-Alexa568	mouse IgG2b-Alexa647	Nuclear stain	Date	Replicate
Replicate 1
KAN358-1	RPE-BFP-Cas9 NCS1 KO (pool)	empty	Fixed in 4% PFA/serum starvation for 24 hours	NCS1, Cell Signaling, 8237P, 1:1000	CEP170, Invitrogen, 41-3200, 1:1000	Ac-Tub, 6B-11, SIGMA, 1:2000	DAPI
KAN358-2	RPE-BFP-Cas9 NCS1 KO (pool)	nontag NCS1 (long EF)	Fixed in 4% PFA/serum starvation for 24 hours	NCS1, Cell Signaling, 8237P, 1:1000	CEP170, Invitrogen, 41-3200, 1:1000	Ac-Tub, 6B-11, SIGMA, 1:2000	DAPI
KAN358-4	RPE-BFP-Cas9 NCS1 KO (pool)	nontag NCS1 G2A (short EF)	Fixed in 4% PFA/serum starvation for 24 hours	NCS1, Cell Signaling, 8237P, 1:1000	CEP170, Invitrogen, 41-3200, 1:1000	Ac-Tub, 6B-11, SIGMA, 1:2000	DAPI
KAN358-12	RPE-BFP-Cas9pMCB306(pool)		Fixed in 4% PFA/serum starvation for 24 hours	NCS1, Cell Signaling, 8237P, 1:1000	CEP170, Invitrogen, 41-3200, 1:1000	Ac-Tub, 6B-11, SIGMA, 1:2000	DAPI
Replicate 2
KAN360-1	RPE-BFP-Cas9 NCS1 KO (pool)	empty	Fixed in 4% PFA/serum starvation for 24 hours	NCS1, Cell Signaling, 8237P, 1:1000	CEP170, Invitrogen, 41-3200, 1:1000	Ac-Tub, 6B-11, SIGMA, 1:2000	DAPI	Experiment No.2
KAN360-2	RPE-BFP-Cas9 NCS1 KO (pool)	nontag NCS1 (long EF)	Fixed in 4% PFA/serum starvation for 24 hours	NCS1, Cell Signaling, 8237P, 1:1000	CEP170, Invitrogen, 41-3200, 1:1000	Ac-Tub, 6B-11, SIGMA, 1:2000	DAPI	Experiment No.2
KAN360-4	RPE-BFP-Cas9 NCS1 KO (pool)	nontag NCS1 G2A (short EF)	Fixed in 4% PFA/serum starvation for 24 hours	NCS1, Cell Signaling, 8237P, 1:1000	CEP170, Invitrogen, 41-3200, 1:1000	Ac-Tub, 6B-11, SIGMA, 1:2000	DAPI	Experiment No.2
KAN360-12	RPE-BFP-Cas9pMCB306(pool)		Fixed in 4% PFA/serum starvation for 24 hours	NCS1, Cell Signaling, 8237P, 1:1000	CEP170, Invitrogen, 41-3200, 1:1000	Ac-Tub, 6B-11, SIGMA, 1:2000	DAPI	Experiment No.2
