# Supplementary material for: Myristoylated Neuronal Calcium Sensor-1 captures the preciliary vesicle at distal appendages
Source: eLife. 2025 Jan 30;14:e85998. doi: 10.7554/eLife.85998 (PMC11984960; doi:10.7554/eLife.85998)
Supplement: Figure 5—source data 7. [file elife-85998-fig5-data7.xlsx]

## Sheet: Raw Data
																			sgGFP	NCS1KO + empty	NCS1KO + NCS1-WT	NCS1KO + NCS1-G2A
	Ciliated	cell counts	ARL13B+ Ac-Tub- dot		Ciliated	cell counts	ARL13B+ Ac-Tub- dot		Ciliated	cell counts	ARL13B+ Ac-Tub- dot		Ciliated	cell counts	ARL13B+ Ac-Tub- dot			KAN357	80.4979	28.3784	70.2381	37.8788
KAN357-12	39	44		KAN357-1	8	34	1	KAN357-2	31	37		KAN357-4	20	42				KAN359	76.9585	32.6772	60.7407	35.2697
2	27	37		2	11	33		2	31	42		2	12	41				KAN369	76.9231	34.5238	60.0806	37.9167
3	24	37		3	13	42		3	48	58		3	25	51				KAN369	74.3719	44.9393	65.1316	33.677
4	30	38		4	7	36		4	27	39		4	14	41				AVERAGE	77.1878	35.1297	64.0478	36.1855
5	35	40		5	9	35		5	23	40		5	12	45
6	39	45		6	15	42		6	17	36		6	17	44
7				7				7				7
8				8				8				8
9				9				9				9
10				10				10				10
	194	241	0		63	222	1		177	252	0		100	264	0
		80.4979				28.3784				70.2381				37.8788
	Ciliated	cell counts	ARL13B+ Ac-Tub- dot		Ciliated	cell counts	ARL13B+ Ac-Tub- dot		Ciliated	cell counts	ARL13B+ Ac-Tub- dot		Ciliated	cell counts	ARL13B+ Ac-Tub- dot
KAN359-12	28	36		KAN359-1	19	38		KAN359-2	30	48		KAN359-4	13	38
2	24	34		2	12	40		2	41	59		2	17	42
3	24	38		3	12	42		3	26	48		3	19	45
4	32	38		4	10	41		4	20	39		4	12	40
5	26	33		5	12	48		5	21	33		5	13	34
6	33	38		6	18	45		6	26	43		6	11	42	3
7				7				7				7
8				8				8				8
9				9				9				9
10				10				10				10
	167	217	0		83	254	0		164	270	0		85	241	3
		76.9585				32.6772				60.7407				35.2697
	Ciliated	cell counts	ARL13B+ Ac-Tub- dot		Ciliated	cell counts	ARL13B+ Ac-Tub- dot		Ciliated	cell counts	ARL13B+ Ac-Tub- dot		Ciliated	cell counts	ARL13B+ Ac-Tub- dot
KAN369-12	21	26		KAN369-1	18	37		KAN369-2	25	47		KAN369-4	13	34
2	26	38		2	11	36		2	13	31		2	20	41
3	39	48		3	22	51		3	23	36		3	13	36
4	27	31		4	11	46		4	28	46		4	16	41
5	26	36		5	16	44		5	33	49		5	18	54
6	21	29		6	9	38		6	27	39		6	11	34
7				7				7				7
8				8				8				8
9				9				9				9
10				10				10				10
	160	208	0		87	252	0		149	248	0		91	240	0
		76.9231				34.5238				60.0806				37.9167
	Ciliated	cell counts	ARL13B+ Ac-Tub- dot		Ciliated	cell counts	ARL13B+ Ac-Tub- dot		Ciliated	cell counts	ARL13B+ Ac-Tub- dot		Ciliated	cell counts	ARL13B+ Ac-Tub- dot
KAN369-18	25	31		KAN369-15	11	35		KAN369-16	29	41		KAN369-17	14	47
2	29	34		2	19	42		2	30	40		2	15	47
3	21	31		3	19	41		3	25	41		3	15	41
4	21	34		4	15	39		4	27	47		4	20	43
5	22	31		5	27	45		5	37	48		5	10	38
6	30	38		6	20	45		6	21	43		6	17	39
7				7				7	29	44		7	7	36
8				8				8				8
9				9				9				9
10				10				10				10
	148	199	0		111	247	0		198	304	0		98	291	0
		74.3719				44.9393				65.1316				33.677

## Sheet: IF condition
Exp. number	Cell line	Gene induced	Culture condition, fixation condition	mouse IgG2a-Alexa488	rabbit-Alexa568	mouse IgG1-Alexa647	Nuclear stain	Date	Replicate
Replicate 1
KAN357-1	RPE-BFP-Cas9 NCS1 KO (pool)	empty	Fixed in 4% PFA/serum starvation for 24 hours	ARL13B, Proteintech, 17711-1-AP, 1:1000	CEP170, Invitrogen, 41-3200, 1:1000	Ac-Tub, 6B-11, SIGMA, 1:2000	DAPI
KAN357-2	RPE-BFP-Cas9 NCS1 KO (pool)	nontag NCS1 (long EF)	Fixed in 4% PFA/serum starvation for 24 hours	ARL13B, Proteintech, 17711-1-AP, 1:1000	CEP170, Invitrogen, 41-3200, 1:1000	Ac-Tub, 6B-11, SIGMA, 1:2000	DAPI
KAN357-4	RPE-BFP-Cas9 NCS1 KO (pool)	nontag NCS1 G2A (short EF)	Fixed in 4% PFA/serum starvation for 24 hours	ARL13B, Proteintech, 17711-1-AP, 1:1000	CEP170, Invitrogen, 41-3200, 1:1000	Ac-Tub, 6B-11, SIGMA, 1:2000	DAPI
KAN357-12	RPE-BFP-Cas9pMCB306(pool)		Fixed in 4% PFA/serum starvation for 24 hours	ARL13B, Proteintech, 17711-1-AP, 1:1000	CEP170, Invitrogen, 41-3200, 1:1000	Ac-Tub, 6B-11, SIGMA, 1:2000	DAPI
Replicate 2
KAN359-1	RPE-BFP-Cas9 NCS1 KO (pool)	empty	Fixed in 4% PFA/serum starvation for 24 hours	ARL13B, Proteintech, 17711-1-AP, 1:1000	CEP170, Invitrogen, 41-3200, 1:1000	Ac-Tub, 6B-11, SIGMA, 1:2000	DAPI	Experiment No.2
KAN359-2	RPE-BFP-Cas9 NCS1 KO (pool)	nontag NCS1 (long EF)	Fixed in 4% PFA/serum starvation for 24 hours	ARL13B, Proteintech, 17711-1-AP, 1:1000	CEP170, Invitrogen, 41-3200, 1:1000	Ac-Tub, 6B-11, SIGMA, 1:2000	DAPI	Experiment No.2
KAN359-4	RPE-BFP-Cas9 NCS1 KO (pool)	nontag NCS1 G2A (short EF)	Fixed in 4% PFA/serum starvation for 24 hours	ARL13B, Proteintech, 17711-1-AP, 1:1000	CEP170, Invitrogen, 41-3200, 1:1000	Ac-Tub, 6B-11, SIGMA, 1:2000	DAPI	Experiment No.2
KAN359-12	RPE-BFP-Cas9pMCB306(pool)		Fixed in 4% PFA/serum starvation for 24 hours	ARL13B, Proteintech, 17711-1-AP, 1:1000	CEP170, Invitrogen, 41-3200, 1:1000	Ac-Tub, 6B-11, SIGMA, 1:2000	DAPI	Experiment No.2
Replicate 3
KAN369-1	RPE-BFP-Cas9 NCS1 KO (pool)	empty	Fixed in 4% PFA/serum starvation for 24 hours	ARL13B, Proteintech, 17711-1-AP, 1:1000	CEP170, Invitrogen, 41-3200, 1:1000	Ac-Tub, 6B-11, SIGMA, 1:2000	DAPI
KAN369-2	RPE-BFP-Cas9 NCS1 KO (pool)	nontag NCS1 (long EF)	Fixed in 4% PFA/serum starvation for 24 hours	ARL13B, Proteintech, 17711-1-AP, 1:1000	CEP170, Invitrogen, 41-3200, 1:1000	Ac-Tub, 6B-11, SIGMA, 1:2000	DAPI
KAN369-4	RPE-BFP-Cas9 NCS1 KO (pool)	nontag NCS1 G2A (short EF)	Fixed in 4% PFA/serum starvation for 24 hours	ARL13B, Proteintech, 17711-1-AP, 1:1000	CEP170, Invitrogen, 41-3200, 1:1000	Ac-Tub, 6B-11, SIGMA, 1:2000	DAPI
KAN369-12	RPE-BFP-Cas9pMCB306(pool)		Fixed in 4% PFA/serum starvation for 24 hours	ARL13B, Proteintech, 17711-1-AP, 1:1000	CEP170, Invitrogen, 41-3200, 1:1000	Ac-Tub, 6B-11, SIGMA, 1:2000	DAPI
Replicate 4
KAN369-15	RPE-BFP-Cas9 NCS1 KO (pool)	empty	Fixed in 4% PFA/serum starvation for 24 hours	ARL13B, Proteintech, 17711-1-AP, 1:1000	CEP170, Invitrogen, 41-3200, 1:1000	Ac-Tub, 6B-11, SIGMA, 1:2000	DAPI
KAN369-16	RPE-BFP-Cas9 NCS1 KO (pool)	nontag NCS1 (long EF)	Fixed in 4% PFA/serum starvation for 24 hours	ARL13B, Proteintech, 17711-1-AP, 1:1000	CEP170, Invitrogen, 41-3200, 1:1000	Ac-Tub, 6B-11, SIGMA, 1:2000	DAPI
KAN369-17	RPE-BFP-Cas9 NCS1 KO (pool)	nontag NCS1 G2A (short EF)	Fixed in 4% PFA/serum starvation for 24 hours	ARL13B, Proteintech, 17711-1-AP, 1:1000	CEP170, Invitrogen, 41-3200, 1:1000	Ac-Tub, 6B-11, SIGMA, 1:2000	DAPI
KAN369-18	RPE-BFP-Cas9pMCB306(pool)		Fixed in 4% PFA/serum starvation for 24 hours	ARL13B, Proteintech, 17711-1-AP, 1:1000	CEP170, Invitrogen, 41-3200, 1:1000	Ac-Tub, 6B-11, SIGMA, 1:2000	DAPI	2018-08-27

## Sheet: Statistics
Number of families	1
Number of comparisons per family	6
Alpha	0.05
Dunnett's T3 multiple comparisons test	Mean Diff.	95.00% CI of diff.	Below threshold?	Summary	Adjusted P Value
sgGFP vs. NCS1KO +empty	42.06	22.09 to 62.03	Yes	**	0.0015	A-B
sgGFP vs. NCS1KO + NCS1-WT	13.14	0.6663 to 25.61	Yes	*	0.0202	A-C
sgGFP vs. NCS1KO + NCS1-G2A	41	33.99 to 48.01	Yes	****	<0.0001	A-D
NCS1KO +empty vs. NCS1KO + NCS1-WT	-28.92	-48.71 to -9.130	Yes	**	0.0048	B-C
NCS1KO +empty vs. NCS1KO + NCS1-G2A	-1.056	-20.66 to 18.55	No	ns	0.9996	B-D
NCS1KO + NCS1-WT vs. NCS1KO + NCS1-G2A	27.86	14.12 to 41.60	Yes	**	0.0018	C-D
Test details	Mean 1	Mean 2	Mean Diff.	SE of diff.	n1	n2	t	DF
sgGFP vs. NCS1KO +empty	77.19	35.13	42.06	3.733	4	4	11.27	3.757
sgGFP vs. NCS1KO + NCS1-WT	77.19	64.05	13.14	2.664	4	4	4.932	4.592
sgGFP vs. NCS1KO + NCS1-G2A	77.19	36.19	41	1.633	4	4	25.11	5.795
NCS1KO +empty vs. NCS1KO + NCS1-WT	35.13	64.05	-28.92	4.226	4	4	6.842	5.234
NCS1KO +empty vs. NCS1KO + NCS1-G2A	35.13	36.19	-1.056	3.665	4	4	0.2881	3.522
NCS1KO + NCS1-WT vs. NCS1KO + NCS1-G2A	64.05	36.19	27.86	2.568	4	4	10.85	4.135
