# Supplementary material for: Myristoylated Neuronal Calcium Sensor-1 captures the preciliary vesicle at distal appendages
Source: eLife. 2025 Jan 30;14:e85998. doi: 10.7554/eLife.85998 (PMC11984960; doi:10.7554/eLife.85998)
Supplement: Figure 5—source data 8. [file elife-85998-fig5-data8.xlsx]

## Sheet: Sheet1
								Rab34+ centriole	cell counts	Dot	Extension	tunnel?	preciliary vesicle??		Rab34+ centriole	cell counts	Dot	Extension	tunnel?	preciliary vesicle??		Rab34+ centriole	cell counts	Dot	Extension
							KAN537-2		14	2				KAN537-3		12	2				KAN537-4		13	1								KAN537	KAN683	KAN685	KAN690	KAN691	Total	S.E.M.
							2		13	0				2		13	2				2		12	1						RPE-BFP-Cas9 sgSafe (pool)			20.2381	20.4082	14.8515	22.7642	19.5655	0.914802
							3		14	1				3		11	1	1			3		12	1						RPE-BFP-Cas9 NCS1KO (pool)	empty	8.05369	10.6509	6.89655	6.42202	3.92157	7.18894	0.700526
							4		16	2				4		14	3				4		10	0						RPE-BFP-Cas9 NCS1KO (pool)	WT-NCS1	13.5714	20.3704	20	18.5185	14.7826	17.4486	0.786842
							5		12	1				5		15	1				5		13	0						RPE-BFP-Cas9 NCS1KO (pool)	G2A-NCS1	7.75194	7.97101	7.69231	5.50459	7.53425	7.29082	0.449608
							6		18	3				6		13	1				6		14	1						RPE-BFP-Cas9 pMCB306 (pool)		21.9298
							7		18	1				7		14	1				7		14	1	2
							8		16	0				8		12	1				8		14	1
							9		17	1				9		18	2				9		15	2
							10		11	1				10		18	4				10		12	0
								12	149	12	0	0	0		19	140	18	1	0	0		10	129	8	2
									8.05369	8.05369	0					13.5714	12.8571	0.714286					7.75194	6.20155	1.55039							RPE-BFP-Cas9 sgSafe (pool)	RPE-BFP-Cas9 NCS1KO (pool)	RPE-BFP-Cas9 NCS1KO (pool)	RPE-BFP-Cas9 NCS1KO (pool)
																																	8.05369	13.5714	7.75194
																																20.2381	10.6509	20.3704	7.97101
	Rab34+ centriole	cell counts	Dot	Extension	tunnel?	preciliary vesicle??		Rab34+ centriole	cell counts	Dot	Extension	tunnel?	preciliary vesicle??		Rab34+ centriole	cell counts	Dot	Extension	tunnel?	preciliary vesicle??		Rab34+ centriole	cell counts	Dot	Extension	tunnel?	preciliary vesicle??					20.4082	6.89655	20	7.69231
KAN683-1		17	5				KAN683-2		19	2				KAN683-3		12	4	1			KAN683-4		11	2								14.8515	6.42202	18.5185	5.50459
2		17	1				2		17	1				2		15	3	2			2		15	1								22.7642	3.92157	14.7826	7.53425
3		17	2	1			3		16	2				3		20	2				3		15	1								19.5655	7.18894	17.4486	7.29082
4		15	4				4		21	3				4		19	5				4		13	1								1.67372	1.09732	1.3844	0.452016
5		17	2	1			5		20	1				5		18	2				5		10	2
6		14	3				6		17	1				6		17	1				6		22	0
7		17	2				7		14	0				7		12	3				7		13	1
8		23	4				8		12	3				8		14	2				8		10	0
9		16	2				9		22	4				9		16	2				9		15	1
10		15	6	1			10		11	1				10		19	6				10		14	2
	34	168	31	3	0	0		18	169	18	0	0	0		33	162	30	3	0	0		11	138	11	0	0	0
		20.2381	18.4524	1.78571					10.6509	10.6509	0					20.3704	18.5185	1.85185					7.97101	7.97101	0
	Rab34+ centriole	cell counts	Dot	Extension	tunnel?	preciliary vesicle??		Rab34+ centriole	cell counts	Dot	Extension	tunnel?	preciliary vesicle??		Rab34+ centriole	cell counts	Dot	Extension	tunnel?	preciliary vesicle??		Rab34+ centriole	cell counts	Dot	Extension	tunnel?	preciliary vesicle??
KAN685-1		15	3				KAN685-2		14	0				KAN685-3		12	1	1			KAN685-4		18	2
2		9	3				2		12	2				2		10	5				2		13	1
3		10	2				3		16	1				3		11	2				3		13	0
4		15	2				4		12	1				4		9	1	1			4		15	0
5		13	2				5		17	1				5		11	0				5		13	1
6		11	2				6		17	1				6		11	1				6		11	1
7		12	3				7		12	2				7		15	2	2			7		16	1
8		13	3				8		16	0				8		11	2				8		18	3
9							9							9							9
10							10							10							10
	20	98	20	0	0	0		8	116	8	0	0	0		18	90	14	4	0	0		9	117	9	0	0	0
		20.4082	20.4082	0					6.89655	6.89655	0					20	15.5556	4.44444					7.69231	7.69231	0
	Rab34+ centriole	cell counts	Dot	Extension	tunnel?	preciliary vesicle??		Rab34+ centriole	cell counts	Dot	Extension	tunnel?	preciliary vesicle??		Rab34+ centriole	cell counts	Dot	Extension	tunnel?	preciliary vesicle??		Rab34+ centriole	cell counts	Dot	Extension	tunnel?	preciliary vesicle??
KAN690-1		19	2				KAN690-2		13	1				KAN690-3		14	2				KAN690-4		18	1
2		14	1				2		14	0				2		14	4				2		14
3		9	1				3		11	1	1			3		13	3				3		15
4		12	3				4		19	1				4		18	4				4		12	1
5		13	1				5		12	0				5		14	1				5		14	1
6		9	1				6		15	3				6		13	2				6		12	2
7		11	3				7		13	0				7		10	2				7		11	1
8		14	3				8		12	0				8		12	2				8		13	0
9							9							9							9
10							10							10							10
	15	101	15	0	0	0		7	109	6	1	0	0		20	108	20	0	0	0		6	109	6	0	0	0
		14.8515	14.8515	0					6.42202	5.50459	0.917431					18.5185	18.5185	0					5.50459	5.50459	0
	Rab34+ centriole	cell counts	Dot	Extension	tunnel?	preciliary vesicle??		Rab34+ centriole	cell counts	Dot	Extension	tunnel?	preciliary vesicle??		Rab34+ centriole	cell counts	Dot	Extension	tunnel?	preciliary vesicle??		Rab34+ centriole	cell counts	Dot	Extension	tunnel?	preciliary vesicle??
KAN691-1		14	5				KAN691-2		16	1				KAN691-3		16	0				KAN691-4		14	0
2		20	2	1			2		22	1				2		14	6				2		16	2
3		15	3				3		19	1				3		14	1				3		18	2
4		12	1	1			4		20	1				4		12	1				4		21	4
5		14	0				5		17	0				5		14	4				5		15	1
6		15	3				6		17	0				6		13	1				6		26	1
7		17	6				7		20	2				7		16					7		14	0
8		16	6				8		22	0				8		16	4				8		22	1
9							9							9							9
10							10							10							10
	28	123	26	2	0	0		6	153	6	0	0	0		17	115	17	0	0	0		11	146	11	0	0	0
		22.7642	21.1382	1.62602					3.92157	3.92157	0					14.7826	14.7826	0					7.53425	7.53425	0

## Sheet: IF condition
Exp. number	Cell line	Gene induced	Culture condition, fixation condition	mouse IgG2a-Alexa488	rabbit-Alexa568	mouse IgG1-Alexa647	Nuclear stain	Date	Replicate
Replicate 1
KAN537-1	RPE-BFP-Cas9 pMCB306 (pool)		asynchronus, Fixed in 4% PFA at RT for 15 minutes.	Myosin Va, sc-365986, Santa Cruz, 1:500	Rab34, 27435-1-AP, Proteintech, 1:500	FGFR1OP,H00011116-M01, 1:500	DAPI	2020-07-23
KAN537-2	RPE-BFP-Cas9 NCS1KO (pool)	empty	asynchronus, Fixed in 4% PFA at RT for 15 minutes.	Myosin Va, sc-365986, Santa Cruz, 1:500	Rab34, 27435-1-AP, Proteintech, 1:500	FGFR1OP,H00011116-M01, 1:500	DAPI	2020-07-23
KAN537-3	RPE-BFP-Cas9 NCS1KO (pool)	WT-NCS1	asynchronus, Fixed in 4% PFA at RT for 15 minutes.	Myosin Va, sc-365986, Santa Cruz, 1:500	Rab34, 27435-1-AP, Proteintech, 1:500	FGFR1OP,H00011116-M01, 1:500	DAPI	2020-07-23
KAN537-4	RPE-BFP-Cas9 NCS1KO (pool)	G2A-NCS1	asynchronus, Fixed in 4% PFA at RT for 15 minutes.	Myosin Va, sc-365986, Santa Cruz, 1:500	Rab34, 27435-1-AP, Proteintech, 1:500	FGFR1OP,H00011116-M01, 1:500	DAPI	2020-07-23
Replicate 2
KAN683-1	RPE-BFP-Cas9 sgSafe (pool)		confluent, Fixed in 4% PFA at RT for 15 minutes.	Myosin Va, sc-365986, Santa Cruz, 1:1000	Rab34, 27435-1-AP, Proteintech, 1:1000	CEP170, Invitrogen, 41-3200, 1:1000	DAPI	2021-06-15	No.2
KAN683-2	RPE-BFP-Cas9 NCS1 KO (pool)	+empty	confluent, Fixed in 4% PFA at RT for 15 minutes.	Myosin Va, sc-365986, Santa Cruz, 1:1000	Rab34, 27435-1-AP, Proteintech, 1:1000	CEP170, Invitrogen, 41-3200, 1:1000	DAPI	2021-06-15	No.2
KAN683-3	RPE-BFP-Cas9 NCS1 KO (pool)	+NCS1 WT	confluent, Fixed in 4% PFA at RT for 15 minutes.	Myosin Va, sc-365986, Santa Cruz, 1:1000	Rab34, 27435-1-AP, Proteintech, 1:1000	CEP170, Invitrogen, 41-3200, 1:1000	DAPI	2021-06-15	No.2
KAN683-4	RPE-BFP-Cas9 NCS1 KO (pool)	+NCS1 G2A	confluent, Fixed in 4% PFA at RT for 15 minutes.	Myosin Va, sc-365986, Santa Cruz, 1:1000	Rab34, 27435-1-AP, Proteintech, 1:1000	CEP170, Invitrogen, 41-3200, 1:1000	DAPI	2021-06-15	No.2
Replicate 3
KAN685-1	RPE-BFP-Cas9 sgSafe (pool)		confluent, Fixed in 4% PFA at RT for 15 minutes.	Myosin Va, sc-365986, Santa Cruz, 1:1000	Rab34, 27435-1-AP, Proteintech, 1:1000	CEP170, Invitrogen, 41-3200, 1:1000	DAPI	2021-06-17	No.3
KAN685-2	RPE-BFP-Cas9 NCS1 KO (pool)	+empty	confluent, Fixed in 4% PFA at RT for 15 minutes.	Myosin Va, sc-365986, Santa Cruz, 1:1000	Rab34, 27435-1-AP, Proteintech, 1:1000	CEP170, Invitrogen, 41-3200, 1:1000	DAPI	2021-06-17	No.3
KAN685-3	RPE-BFP-Cas9 NCS1 KO (pool)	+NCS1 WT	confluent, Fixed in 4% PFA at RT for 15 minutes.	Myosin Va, sc-365986, Santa Cruz, 1:1000	Rab34, 27435-1-AP, Proteintech, 1:1000	CEP170, Invitrogen, 41-3200, 1:1000	DAPI	2021-06-17	No.3
KAN685-4	RPE-BFP-Cas9 NCS1 KO (pool)	+NCS1 G2A	confluent, Fixed in 4% PFA at RT for 15 minutes.	Myosin Va, sc-365986, Santa Cruz, 1:1000	Rab34, 27435-1-AP, Proteintech, 1:1000	CEP170, Invitrogen, 41-3200, 1:1000	DAPI	2021-06-17	No.3
Replicate 4
KAN690-1	RPE-BFP-Cas9 sgSafe (pool)		Fixed in 4% PFA at RT for 15 minutes	Myosin Va, sc-365986, Santa Cruz, 1:1000	Rab34, 27435-1-AP, Proteintech, 1:1000	CEP170, Invitrogen, 41-3200, 1:1000	DAPI	2021-09-01	No.5
KAN690-2	RPE-BFP-Cas9 NCS1 KO (pool)	+empty	Fixed in 4% PFA at RT for 15 minutes	Myosin Va, sc-365986, Santa Cruz, 1:1000	Rab34, 27435-1-AP, Proteintech, 1:1000	CEP170, Invitrogen, 41-3200, 1:1000	DAPI	2021-09-01	No.5
KAN690-3	RPE-BFP-Cas9 NCS1 KO (pool)	+NCS1 WT	Fixed in 4% PFA at RT for 15 minutes	Myosin Va, sc-365986, Santa Cruz, 1:1000	Rab34, 27435-1-AP, Proteintech, 1:1000	CEP170, Invitrogen, 41-3200, 1:1000	DAPI	2021-09-01	No.5
KAN690-4	RPE-BFP-Cas9 NCS1 KO (pool)	+NCS1 G2A	Fixed in 4% PFA at RT for 15 minutes	Myosin Va, sc-365986, Santa Cruz, 1:1000	Rab34, 27435-1-AP, Proteintech, 1:1000	CEP170, Invitrogen, 41-3200, 1:1000	DAPI	2021-09-01	No.5
Replicate 5
KAN691-1	RPE-BFP-Cas9 sgSafe (pool)		Fixed in 4% PFA at RT for 15 minutes	Myosin Va, sc-365986, Santa Cruz, 1:1000	Rab34, 27435-1-AP, Proteintech, 1:1000	FGFR1OP, Abnova, H00011116-M01, 1:1000	DAPI	2021-09-11	with newly purchased FOP antibody
KAN691-2	RPE-BFP-Cas9 NCS1 KO (pool)	+empty	Fixed in 4% PFA at RT for 15 minutes	Myosin Va, sc-365986, Santa Cruz, 1:1000	Rab34, 27435-1-AP, Proteintech, 1:1000	FGFR1OP, Abnova, H00011116-M01, 1:1000	DAPI	2021-09-11	with newly purchased FOP antibody
KAN691-3	RPE-BFP-Cas9 NCS1 KO (pool)	+NCS1 WT	Fixed in 4% PFA at RT for 15 minutes	Myosin Va, sc-365986, Santa Cruz, 1:1000	Rab34, 27435-1-AP, Proteintech, 1:1000	FGFR1OP, Abnova, H00011116-M01, 1:1000	DAPI	2021-09-11	with newly purchased FOP antibody
KAN691-4	RPE-BFP-Cas9 NCS1 KO (pool)	+NCS1 G2A	Fixed in 4% PFA at RT for 15 minutes	Myosin Va, sc-365986, Santa Cruz, 1:1000	Rab34, 27435-1-AP, Proteintech, 1:1000	FGFR1OP, Abnova, H00011116-M01, 1:1000	DAPI	2021-09-11	with newly purchased FOP antibody

## Sheet: Statistics
Table Analyzed	Data 1						Number of families	1
							Number of comparisons per family	6
Brown-Forsythe ANOVA test							Alpha	0.05
F* (DFn, DFd)	28.39 (3.000, 10.20)
P value	<0.0001						Dunnett's T3 multiple comparisons test	Mean Diff.	95.00% CI of diff.	Below threshold?	Summary	Adjusted P Value
P value summary	****						sgSafe (pool) vs. NCS1KO (pool)	12.38	3.006 to 21.75	Yes	**	0.0076	A-B
Significant diff. among means (P < 0.05)?	Yes						sgSafe (pool) vs. NCS1KO (pool) + NCS1-WT	2.117	-7.207 to 11.44	No	ns	0.8894	A-C
							sgSafe (pool) vs. NCS1KO (pool) + NCS1-G2A	12.27	0.6057 to 23.94	Yes	*	0.0217	A-D
Welch's ANOVA test							NCS1KO (pool) vs. NCS1KO (pool) + NCS1-WT	-10.26	-17.08 to -3.441	Yes	**	0.0022	B-C
W (DFn, DFd)	26.21 (3.000, 6.962)						NCS1KO (pool) vs. NCS1KO (pool) + NCS1-G2A	-0.1019	-5.658 to 5.454	No	ns	>0.9999	B-D
P value	0.0004						NCS1KO (pool) + NCS1-WT vs. NCS1KO (pool) + NCS1-G2A	10.16	3.339 to 16.98	Yes	**	0.0044	C-D
P value summary	***
Significant diff. among means (P < 0.05)?	Yes						Test details	Mean 1	Mean 2	Mean Diff.	SE of diff.	n1	n2	t	DF
							sgSafe (pool) vs. NCS1KO (pool)	19.57	7.189	12.38	2.001	4	5	6.184	5.387
Data summary							sgSafe (pool) vs. NCS1KO (pool) + NCS1-WT	19.57	17.45	2.117	2.172	4	5	0.9746	6.298
Number of treatments (columns)	4						sgSafe (pool) vs. NCS1KO (pool) + NCS1-G2A	19.57	7.291	12.27	1.734	4	5	7.08	3.44
Number of values (total)	19						NCS1KO (pool) vs. NCS1KO (pool) + NCS1-WT	7.189	17.45	-10.26	1.767	5	5	5.808	7.604
							NCS1KO (pool) vs. NCS1KO (pool) + NCS1-G2A	7.189	7.291	-0.1019	1.187	5	5	0.08584	5.319
							NCS1KO (pool) + NCS1-WT vs. NCS1KO (pool) + NCS1-G2A	17.45	7.291	10.16	1.456	5	5	6.975	4.843
