# Supplementary material for: Myristoylated Neuronal Calcium Sensor-1 captures the preciliary vesicle at distal appendages
Source: eLife. 2025 Jan 30;14:e85998. doi: 10.7554/eLife.85998 (PMC11984960; doi:10.7554/eLife.85998)
Supplement: Figure 6—source data 1. [file elife-85998-fig6-data1.xlsx]

## Sheet: Sheet1
Exp. number	Cell line	Culture condition	Fixation condition	488	568	647	Nuclear stain	Date	Replicate
KAN499-11	RPE-hTERT	DMSO/confluent	Fixed in 100% methanol at -20C for 5 minutes.	CEP89, 24002-1-AP, Proteintech, 1:500	Tubulin, DM1A, T-9026, SIGMA, 1:2000	FGFR1OP,H00011116-M01, 1:1000	DAPI	2019-05-28
KAN499-13	RPE-hTERT	10 µM Nocodazole/serum starved for 9 hours	Fixed in 100% methanol at -20C for 5 minutes.	CEP89, 24002-1-AP, Proteintech, 1:500	Tubulin, DM1A, T-9026, SIGMA, 1:2000	FGFR1OP,H00011116-M01, 1:1000	DAPI	2019-05-28
KAN499-15	RPE-hTERT	10 µM Nocodazole/serum starved for 24 hours	Fixed in 100% methanol at -20C for 5 minutes.	CEP89, 24002-1-AP, Proteintech, 1:500	Tubulin, DM1A, T-9026, SIGMA, 1:2000	FGFR1OP,H00011116-M01, 1:1000	DAPI	2019-05-28
