# Supplementary material for: Myristoylated Neuronal Calcium Sensor-1 captures the preciliary vesicle at distal appendages
Source: eLife. 2025 Jan 30;14:e85998. doi: 10.7554/eLife.85998 (PMC11984960; doi:10.7554/eLife.85998)
Supplement: Figure 6—source data 2. [file elife-85998-fig6-data2.xlsx]

## Sheet: Raw data
	Ciliated	cell counts	ARL13B+ Ac-Tub- dot		Ciliated	cell counts	ARL13B+ Ac-Tub- dot		Ciliated	cell counts	ARL13B+ Ac-Tub- dot		Ciliated	cell counts	ARL13B+ Ac-Tub- dot		Ciliated	cell counts	ARL13B+ Ac-Tub- dot		Ciliated	cell counts	ARL13B+ Ac-Tub- dot		Ciliated	cell counts	ARL13B+ Ac-Tub- dot
KAN499-37	1	10		KAN499-38	3	14	1	KAN499-39	1	10		KAN499-40	6	13	1	KAN499-41	0	8		KAN499-42	13	15		KAN499-43	0	11
2	2	8		2	5	17	1	2	0	13	1	2	3	13	1	2	1	13		2	16	18	1	2	2	11	5
3	2	14		3	6	17		3	1	13	1	3	4	10	2	3	2	12	1	3	12	16	2	3	0	14	8
4	3	21		4	5	16		4	1	15	2	4	4	14		4	0	10		4	11	12		4	0	10	5
5	3	14		5	3	10		5	0	15	2	5	6	16		5	1	10	1	5	14	16		5	0	9	4
6	5	13		6	3	16	2	6	0	9		6	6	15	3	6	0	10	1	6	10	11	1	6	0	11	6
7	0	10		7	4	15	1	7				7	7	10	1	7	0	13	2	7				7						0 hour	3 hour s.s. + DMSO	3 hour s.s. + nocodazole	8 hour s.s. + DMSO	8 hour s.s. + nocodazole	24 hour s.s. + DMSO	24 hour s.s. + nocodazole
8	0	12		8	3	15		8				8				8				8				8					KAN499	14.5299	26.6667	4	39.5604	5.26316	86.3636	3.0303
9	1	15		9				9				9				9				9				9					KAN704	2.66667	12.0219	1.12994	34.0206	0	93.1034	4.9505
10				10				10				10				10				10				10					KAN709	10.7345	26.5537	1.7341	40	0	86.802	0
	17	117	0		32	120	5		3	75	6		36	91	8		4	76	5		76	88	4		2	66	28		Total	9.31035	21.7474	2.28802	37.8604	1.75439	88.7564	2.66027
		14.5299	0			26.6667	4.16667			4	8			39.5604	8.79121			5.26316	6.57895			86.3636	4.54545			3.0303	42.4242		S.E.M.	3.49787	4.86288	0.873579	1.92406	1.75439	2.17722	1.44101
	Ciliated	cell counts	ARL13B+dot		Ciliated	cell counts	ARL13B+dot		Ciliated	cell counts	ARL13B+dot		Ciliated	cell counts	ARL13B+dot		Ciliated	cell counts	ARL13B+dot		Ciliated	cell counts	ARL13B+dot		Ciliated	cell counts	ARL13B+dot
KAN704-1		17		KAN704-2	5	18		KAN704-3		15		KAN704-4	10	25		KAN704-5		19		KAN704-6	27	29		KAN704-7		14	7
2		15		2	3	14		2	1	16		2	17	30		2		20		2	22	25		2		14	7
3	1	20		3	3	16		3		19		3	7	17		3		19		3	20	20		3	1	12	6
4		22		4	2	26		4		18		4	6	27		4		15		4	21	25		4	2	8
5	1	18		5	3	17		5	1	19		5	11	28		5		14		5	16	19		5		12
6	2	20		6	1	17		6		20		6	4	26		6		17		6	27	28		6		9
7		18		7	1	19		7		18		7	8	21		7		13		7	31	31		7		11	4
8		20		8	1	17		8		15		8	3	20		8		22		8	25	26		8
9				9	1	16		9		18		9				9				9				9	2	12
10				10	2	23		10		19		10				10				10				10		9
	4	150	0		22	183	0		2	177	0		66	194	0		0	139	0		189	203	0		5	101	24
		2.66667				12.0219				1.12994				34.0206				0				93.1034				4.9505
	Ciliated	cell counts	ARL13B+dot		Ciliated	cell counts	ARL13B+dot		Ciliated	cell counts	ARL13B+dot		Ciliated	cell counts	ARL13B+dot		Ciliated	cell counts	ARL13B+dot		Ciliated	cell counts	ARL13B+dot		Ciliated	cell counts	ARL13B+dot
KAN709-1	1	22		KAN709-2	7	22		KAN709-3	1	23	3	KAN709-4	5	21		KAN709-5		14	3	KAN709-6	21	23		KAN709-7		10	5
2	0	18	1	2	8	22		2	0	22		2	10	26		2		20	1	2	20	24		2		11
3	1	17		3	4	22		3	0	18		3	6	22		3		12		3	32	33		3		8	5
4	4	25		4	4	28		4	0	20		4	17	23		4		16		4	19	20		4		14	4
5	6	25		5	6	23		5	0	22		5	11	26		5		13		5	21	27		5		9	5
6	3	22		6	7	19		6	1	17		6	8	20		6		13		6	18	22		6		10	1
7	2	22		7	3	19		7	1	25		7	7	20		7		13	2	7	20	23		7		11
8	2	26		8	8	22		8	0	26		8	10	27		8		13		8	20	25		8		10	5
9				9				9				9				9		15	4	9				9
10				10				10				10				10		12	1	10				10
	19	177	1		47	177	0		3	173	3		74	185	0		0	141	11		171	197	0		0	83	25
		10.7345				26.5537				1.7341				40				0				86.802				0

## Sheet: IF condition
Exp. number	Cell line	Gene induced	Culture condition, fixation condition	rabbit-Alexa488	mouse IgG1-Alexa568	mouse IgG2b-Alexa647	Nuclear stain	Date	Replicate
Replicate1
KAN499-37	RPE-hTERT		confluent, Fixed in 4% PFA at RT for 15 minutes.	ARL13B, Proteintech, 17711-1-AP, 1:1000	CEP170, Invitrogen, 41-3200, 1:1000	Ac-Tub, 6B-11, SIGMA, 1:2000		2019-05-28
KAN499-38	RPE-hTERT	+DMSO (0.06%)	Serum starved for 3 hours. Fixed in 4% PFA at RT for 15 minutes.	ARL13B, Proteintech, 17711-1-AP, 1:1000	CEP170, Invitrogen, 41-3200, 1:1000	Ac-Tub, 6B-11, SIGMA, 1:2000		2019-05-28
KAN499-39	RPE-hTERT	+ 10 µM nocodazole	Serum starved for 3 hours. Fixed in 4% PFA at RT for 15 minutes.	ARL13B, Proteintech, 17711-1-AP, 1:1000	CEP170, Invitrogen, 41-3200, 1:1000	Ac-Tub, 6B-11, SIGMA, 1:2000		2019-05-28
KAN499-40	RPE-hTERT	+DMSO (0.06%)	Serum starved for 8 hours. Fixed in 4% PFA at RT for 15 minutes.	ARL13B, Proteintech, 17711-1-AP, 1:1000	CEP170, Invitrogen, 41-3200, 1:1000	Ac-Tub, 6B-11, SIGMA, 1:2000		2019-05-28
KAN499-41	RPE-hTERT	+ 10 µM nocodazole	Serum starved for 8 hours. Fixed in 4% PFA at RT for 15 minutes.	ARL13B, Proteintech, 17711-1-AP, 1:1000	CEP170, Invitrogen, 41-3200, 1:1000	Ac-Tub, 6B-11, SIGMA, 1:2000		2019-05-28
KAN499-42	RPE-hTERT	+DMSO (0.06%)	Serum starved for 24 hours. Fixed in 4% PFA at RT for 15 minutes.	ARL13B, Proteintech, 17711-1-AP, 1:1000	CEP170, Invitrogen, 41-3200, 1:1000	Ac-Tub, 6B-11, SIGMA, 1:2000		2019-05-28
KAN499-43	RPE-hTERT	+ 10 µM nocodazole	Serum starved for 24 hours. Fixed in 4% PFA at RT for 15 minutes.	ARL13B, Proteintech, 17711-1-AP, 1:1000	CEP170, Invitrogen, 41-3200, 1:1000	Ac-Tub, 6B-11, SIGMA, 1:2000		2019-05-28
Replicate2
KAN704-1	RPE-hTERT		confluent, Fixed in 4% PFA at RT for 15 minutes.	ARL13B, Proteintech, 17711-1-AP, 1:2000	CEP170, Invitrogen, 41-3200, 1:1000	Ac-Tub, 6B-11, Santa Cruz, 1:1000	DAPI	2021-10-05
KAN704-2	RPE-hTERT	+DMSO (0.06%)	Serum starved for 3 hours. Fixed in 4% PFA at RT for 15 minutes.	ARL13B, Proteintech, 17711-1-AP, 1:2000	CEP170, Invitrogen, 41-3200, 1:1000	Ac-Tub, 6B-11, Santa Cruz, 1:1000	DAPI	2021-10-05
KAN704-3	RPE-hTERT	+ 10 µM nocodazole	Serum starved for 3 hours. Fixed in 4% PFA at RT for 15 minutes.	ARL13B, Proteintech, 17711-1-AP, 1:2000	CEP170, Invitrogen, 41-3200, 1:1000	Ac-Tub, 6B-11, Santa Cruz, 1:1000	DAPI	2021-10-05
KAN704-4	RPE-hTERT	+DMSO (0.06%)	Serum starved for 8 hours. Fixed in 4% PFA at RT for 15 minutes.	ARL13B, Proteintech, 17711-1-AP, 1:2000	CEP170, Invitrogen, 41-3200, 1:1000	Ac-Tub, 6B-11, Santa Cruz, 1:1000	DAPI	2021-10-05
KAN704-5	RPE-hTERT	+ 10 µM nocodazole	Serum starved for 8 hours. Fixed in 4% PFA at RT for 15 minutes.	ARL13B, Proteintech, 17711-1-AP, 1:2000	CEP170, Invitrogen, 41-3200, 1:1000	Ac-Tub, 6B-11, Santa Cruz, 1:1000	DAPI	2021-10-05
KAN704-6	RPE-hTERT	+DMSO (0.06%)	Serum starved for 24 hours. Fixed in 4% PFA at RT for 15 minutes.	ARL13B, Proteintech, 17711-1-AP, 1:2000	CEP170, Invitrogen, 41-3200, 1:1000	Ac-Tub, 6B-11, Santa Cruz, 1:1000	DAPI	2021-10-05
KAN704-7	RPE-hTERT	+ 10 µM nocodazole	Serum starved for 24 hours. Fixed in 4% PFA at RT for 15 minutes.	ARL13B, Proteintech, 17711-1-AP, 1:2000	CEP170, Invitrogen, 41-3200, 1:1000	Ac-Tub, 6B-11, Santa Cruz, 1:1000	DAPI	2021-10-05
Replicate3
KAN709-1	RPE-hTERT		confluent, Fixed in 4% PFA at RT for 15 minutes.	ARL13B, Proteintech, 17711-1-AP, 1:2000	CEP170, Invitrogen, 41-3200, 1:1000	Ac-Tub, 6B-11, Santa Cruz, 1:1000	DAPI	2021-10-08
KAN709-2	RPE-hTERT	+DMSO (0.06%)	Serum starved for 3 hours. Fixed in 4% PFA at RT for 15 minutes.	ARL13B, Proteintech, 17711-1-AP, 1:2000	CEP170, Invitrogen, 41-3200, 1:1000	Ac-Tub, 6B-11, Santa Cruz, 1:1000	DAPI	2021-10-08
KAN709-3	RPE-hTERT	+ 10 µM nocodazole	Serum starved for 3 hours. Fixed in 4% PFA at RT for 15 minutes.	ARL13B, Proteintech, 17711-1-AP, 1:2000	CEP170, Invitrogen, 41-3200, 1:1000	Ac-Tub, 6B-11, Santa Cruz, 1:1000	DAPI	2021-10-08
KAN709-4	RPE-hTERT	+DMSO (0.06%)	Serum starved for 8 hours. Fixed in 4% PFA at RT for 15 minutes.	ARL13B, Proteintech, 17711-1-AP, 1:2000	CEP170, Invitrogen, 41-3200, 1:1000	Ac-Tub, 6B-11, Santa Cruz, 1:1000	DAPI	2021-10-08
KAN709-5	RPE-hTERT	+ 10 µM nocodazole	Serum starved for 8 hours. Fixed in 4% PFA at RT for 15 minutes.	ARL13B, Proteintech, 17711-1-AP, 1:2000	CEP170, Invitrogen, 41-3200, 1:1000	Ac-Tub, 6B-11, Santa Cruz, 1:1000	DAPI	2021-10-08
KAN709-6	RPE-hTERT	+DMSO (0.06%)	Serum starved for 24 hours. Fixed in 4% PFA at RT for 15 minutes.	ARL13B, Proteintech, 17711-1-AP, 1:2000	CEP170, Invitrogen, 41-3200, 1:1000	Ac-Tub, 6B-11, Santa Cruz, 1:1000	DAPI	2021-10-08
KAN709-7	RPE-hTERT	+ 10 µM nocodazole	Serum starved for 24 hours. Fixed in 4% PFA at RT for 15 minutes.	ARL13B, Proteintech, 17711-1-AP, 1:2000	CEP170, Invitrogen, 41-3200, 1:1000	Ac-Tub, 6B-11, Santa Cruz, 1:1000	DAPI	2021-10-08

## Sheet: Total
	0 hour	3 hour s.s. + DMSO	3 hour s.s. + nocodazole	8 hour s.s. + DMSO	8 hour s.s. + nocodazole	24 hour s.s. + DMSO	24 hour s.s. + nocodazole
KAN499	14.5299	26.6667	4	39.5604	5.26316	86.3636	3.0303
KAN704	2.66667	12.0219	1.12994	34.0206	0	93.1034	4.9505
KAN709	10.7345	26.5537	1.7341	40	0	86.802	0
Total	9.31035	21.7474	2.28802	37.8604	1.75439	88.7564	2.66027
S.E.M.	3.49787	4.86288	0.873579	1.92406	1.75439	2.17722	1.44101
DMSO							Nocodazole
	KAN499	KAN704	KAN709	AVERAGE	SEM			KAN499	KAN704	KAN709	AVERAGE	SEM
0 hour	14.5299	2.66667	10.7345	9.31035	3.49787		0 hour	14.5299	2.66667	10.7345	9.31035	3.49787
3 hour s.s.	26.6667	12.0219	26.5537	21.7474	4.86288		3 hour s.s.	4	1.12994	1.7341	2.28802	0.873579
8 hour s.s.	39.5604	34.0206	40	37.8604	1.92406		8 hour s.s.	5.26316	0	0	1.75439	1.75439
24 hour s.s.	86.3636	93.1034	86.802	88.7564	2.17722		24 hour s.s.	3.0303	4.9505	0	2.66027	1.44101

## Sheet: Statistics
Table Analyzed	Data 2
Column A	DMSO				Multiple unpaired t test (DMSO v.s. nocodazole
vs.	vs.					Discovery?	P value	Mean of DMSO	Mean of Nocodazole	Difference	SE of difference	t ratio	df	q value
Column B	Nocodazole				DMSO v.s.s Noc (0 h)	No	>0.999999	9.31	9.31	0	4.947	0	4	0.505
					DMSO v.s.s Noc (3 h)	No	0.053089	21.75	2.288	19.46	4.941	3.939	2.129	0.035746
Test details					DMSO v.s.s Noc (8 h)	Yes	0.000165	37.86	1.754	36.11	2.604	13.87	3.966	0.000167
Test name	Unpaired t test with Welch correction				DMSO v.s.s Noc (24 h)	Yes	1.9e-05	88.76	2.66	86.1	2.611	32.98	3.47	3.7e-05
Variance assumption	Individual variance for each group
Multiple comparisons	False Discovery Rate (FDR)
Method	Two-stage step-up (Benjamini, Krieger, and Yekutieli)
Desired FDR (Q)	1.00%
Number of tests performed	4
Number of rows omitted	0
