# Supplementary material for: Myristoylated Neuronal Calcium Sensor-1 captures the preciliary vesicle at distal appendages
Source: eLife. 2025 Jan 30;14:e85998. doi: 10.7554/eLife.85998 (PMC11984960; doi:10.7554/eLife.85998)
Supplement: Figure 6—source data 3. [file elife-85998-fig6-data3.xlsx]

## Sheet: Raw data
	Rab34+ centriole	cell counts	Dot	Extension	tunnel?	preciliary vesicle??		Rab34+ centriole	cell counts	Dot	Extension	tunnel?	preciliary vesicle??		Rab34+ centriole	cell counts	Dot	Extension	tunnel?	preciliary vesicle??		Rab34+ centriole	cell counts	Dot	Extension	tunnel?	preciliary vesicle??		Rab34+ centriole	cell counts	Dot	Extension	tunnel?	preciliary vesicle??		Rab34+ centriole	cell counts	Dot	Extension	preciliary vesicle + ciliary vesicle	preciliary vesicle without ciliary vesicle		Rab34+ centriole	cell counts	Dot	Extension	preciliary vesicle + ciliary vesicle	preciliary vesicle without ciliary vesicle
KAN499-44	3	11	3				KAN499-45	3	7	3				KAN499-46	0	11	0				KAN499-47	6	14	3	3			KAN499-48	0	13	0				KAN499-49	6	11	1	5			KAN499-50	0	12
2	3	10	2				2	3	14	2	1			2	1	11		1			2	4	12	2	2			2	0	14	0				2	2	11		2			2	0	7
3	1	8	1				3	2	12	1	1			3	0	9	0				3	4	12	4				3	1	14		1			3	0	10					3	1	14		1
4	1	8	1				4	2	11	1	1			4	0	12	0				4	7	12	5	2			4	0	12	0				4	3	14		3			4	1	13		1
5	3	8	3				5	4	9	2	2			5	0	9	0				5	3	13	2	1			5	1	11	1				5	2	11	1	1			5	0	9	0
6	3	11	3				6	4	9	3	1			6	0	15	0				6	2	13	2				6	0	11	0				6	4	9	2	2			6	0	14	0
7	1	11	1				7	3	11	2	1			7	0	9	0				7	3	13	2	1			7	1	7	1				7	3	11		3			7	2	14	2
8	3	11	3				8	3	12	1	2			8	1	10	1				8	4	12	4				8	1	10		1			8	4	13	1	3			8	0	10
9							9							9							9							9							9							9
10							10							10							10							10							10							10
	17	78	17	0	0	0		24	85	15	9	0	0		2	86	1	1	0	0		33	101	24	9	0	0		4	92	2	2	0	0		24	90	5	19	0	0		4	93	2	2	0	0
		21.7949							28.2353							2.32558							32.6733							4.34783							26.6667							4.30108
	Rab34+ centriole	cell counts	Dot	Extension	tunnel?	preciliary vesicle??		Rab34+ centriole	cell counts	Dot	Extension	tunnel?	preciliary vesicle??		Rab34+ centriole	cell counts	Dot	Extension	tunnel?	preciliary vesicle??		Rab34+ centriole	cell counts	Dot	Extension	tunnel?	preciliary vesicle??		Rab34+ centriole	cell counts	Dot	Extension	tunnel?	preciliary vesicle??		Rab34+ centriole	cell counts	Dot	Extension	tunnel?	preciliary vesicle??		Rab34+ centriole	cell counts	Dot	Extension	tunnel?	preciliary vesicle??
KAN705-1		17	3	1			KAN705-2		16	2				KAN705-3		13	0				KAN705-4		18	4	1			KAN705-5		15	0				KAN705-6		14		3			KAN705-7		12	0
2		19	3	1			2		16	3	2			2		16	0				2		17	1	1			2		17	0				2		18		5			2		9
3		28	8	2			3		16	4				3		13	0				3		18	2	1			3		13	0				3		23					3		10
4		16	5				4		20	5	1			4		22		1			4		17	3	1			4		15	0				4		18					4		7	1
5		25	6	1			5		19	5	2			5		13	0				5		17	3				5		11	0				5		14	1	1			5		10
6		16	4				6		17	2	1			6		12	0				6		19	2	3			6		11	0				6		18	1	5			6		13
7		20	1	2			7		19	6	2			7		18	1				7		16	1	3			7		11	0	1			7		20		4			7		13		1
8		23	5				8		14	1				8		15	1				8		12	1	2			8		13	0				8		17	1	3			8		14
9							9							9							9							9							9							9		17
10							10							10							10							10							10							10		10
	42	164	35	7	0	0		36	137	28	8	0	0		3	122	2	1	0	0		29	134	17	12	0	0		1	106	0	1	0	0		24	142	3	21	0	0		2	115	1	1	0	0
		25.6098	21.3415	4.26829					26.2774	20.438	5.83942					2.45902	1.63934	0.819672					21.6418	12.6866	8.95522					0.943396	0	0.943396					16.9014	2.11268	14.7887					1.73913	0.869565	0.869565
	Rab34+ centriole	cell counts	Dot	Extension	tunnel?	preciliary vesicle??		Rab34+ centriole	cell counts	Dot	Extension	tunnel?	preciliary vesicle??		Rab34+ centriole	cell counts	Dot	Extension	tunnel?	preciliary vesicle??		Rab34+ centriole	cell counts	Dot	Extension	tunnel?	preciliary vesicle??		Rab34+ centriole	cell counts	Dot	Extension	tunnel?	preciliary vesicle??		Rab34+ centriole	cell counts	Dot	Extension	tunnel?	preciliary vesicle??		Rab34+ centriole	cell counts	Dot	Extension	tunnel?	preciliary vesicle??
KAN710-1		18	6				KAN710-2		21	6				KAN710-3		13	0				KAN710-4		20	1	4			KAN710-5		10	0				KAN710-6		23		2			KAN710-7		5
2		16	3				2		15	4	1			2		14					2		19		1			2		9					2		20					2		6
3		17	3				3		21	4	2			3		18					3		19	1				3		16					3		16					3		10
4		17	7				4		23	5	1			4		14					4		22	2	1			4		12					4		14	2	2			4		12		1
5		19	6				5		23	3				5		17	1				5		20	4				5		20					5		19	4	2			5		7
6		20	2	1			6		22	3	1			6		17					6		19	2	2			6		12	1				6		19	2	1			6		10
7		22	5				7		26	5	2			7		16					7		19	3				7		10					7		26	1	3			7		8
8		16	2				8		21	4	1			8		13					8		27	3	2			8		14					8		21		4			8		5
9							9							9							9							9							9							9
10							10							10							10							10							10							10
	35	145	34	1	0	0		42	172	34	8	0	0		1	122	1	0	0	0		26	165	16	10	0	0		1	103	1	0	0	0		23	158	9	14	0	0		1	63	0	1	0	0
		24.1379	23.4483	0.689655					24.4186	19.7674	4.65116					0.819672	0.819672	0					15.7576	9.69697	6.06061					0.970874	0.970874	0					14.557	5.6962	8.86076					1.5873	0	1.5873

## Sheet: IF condition
Exp. number	Cell line	Gene induced	Culture condition, fixation condition	mouse IgG2a-Alexa488	Rabbit-Alexa568	mouse IgG2b-Alexa647	Nuclear stain	Date	Replicate
Replicate 1
KAN499-44	RPE-hTERT	DMSO/confluent	Fixed in 4% PFA at RT for 15 minutes.	Myosin Va, sc-365986, Santa Cruz, 1:1000	Rab34, 27435-1-AP, Proteintech, 1:1000	FGFR1OP,H00011116-M01, 1:1000	DAPI	2019-05-28
KAN499-45	RPE-hTERT	DMSO/serum starved for 3 hours	Fixed in 4% PFA at RT for 15 minutes.	Myosin Va, sc-365986, Santa Cruz, 1:1000	Rab34, 27435-1-AP, Proteintech, 1:1000	FGFR1OP,H00011116-M01, 1:1000	DAPI	2019-05-28
KAN499-46	RPE-hTERT	10 µM Nocodazole/serum starved for 3 hours	Fixed in 4% PFA at RT for 15 minutes.	Myosin Va, sc-365986, Santa Cruz, 1:1000	Rab34, 27435-1-AP, Proteintech, 1:1000	FGFR1OP,H00011116-M01, 1:1000	DAPI	2019-05-28
KAN499-47	RPE-hTERT	DMSO/serum starved for 9 hours	Fixed in 4% PFA at RT for 15 minutes.	Myosin Va, sc-365986, Santa Cruz, 1:1000	Rab34, 27435-1-AP, Proteintech, 1:1000	FGFR1OP,H00011116-M01, 1:1000	DAPI	2019-05-28
KAN499-48	RPE-hTERT	10 µM Nocodazole/serum starved for 9 hours	Fixed in 4% PFA at RT for 15 minutes.	Myosin Va, sc-365986, Santa Cruz, 1:1000	Rab34, 27435-1-AP, Proteintech, 1:1000	FGFR1OP,H00011116-M01, 1:1000	DAPI	2019-05-28
KAN499-49	RPE-hTERT	DMSO/serum starved for 24 hours	Fixed in 4% PFA at RT for 15 minutes.	Myosin Va, sc-365986, Santa Cruz, 1:1000	Rab34, 27435-1-AP, Proteintech, 1:1000	FGFR1OP,H00011116-M01, 1:1000	DAPI	2019-05-28
KAN499-50	RPE-hTERT	10 µM Nocodazole/serum starved for 24 hours	Fixed in 4% PFA at RT for 15 minutes.	Myosin Va, sc-365986, Santa Cruz, 1:1000	Rab34, 27435-1-AP, Proteintech, 1:1000	FGFR1OP,H00011116-M01, 1:1000	DAPI	2019-05-28
Replicate 2
KAN705-1	RPE-hTERT		confluent, Fixed in 4% PFA at RT for 15 minutes.	Myosin Va, sc-365986, Santa Cruz, 1:1000	Rab34, 27435-1-AP, Proteintech, 1:1000	CEP170, Invitrogen, 41-3200, 1:1000	DAPI	2021-10-05
KAN705-2	RPE-hTERT	+DMSO	Serum starved for 3 hours. Fixed in 4% PFA at RT for 15 minutes.	Myosin Va, sc-365986, Santa Cruz, 1:1000	Rab34, 27435-1-AP, Proteintech, 1:1000	CEP170, Invitrogen, 41-3200, 1:1000	DAPI	2021-10-05
KAN705-3	RPE-hTERT	+ 10 µM nocodazole	Serum starved for 3 hours. Fixed in 4% PFA at RT for 15 minutes.	Myosin Va, sc-365986, Santa Cruz, 1:1000	Rab34, 27435-1-AP, Proteintech, 1:1000	CEP170, Invitrogen, 41-3200, 1:1000	DAPI	2021-10-05
KAN705-4	RPE-hTERT	+DMSO	Serum starved for 8 hours. Fixed in 4% PFA at RT for 15 minutes.	Myosin Va, sc-365986, Santa Cruz, 1:1000	Rab34, 27435-1-AP, Proteintech, 1:1000	CEP170, Invitrogen, 41-3200, 1:1000	DAPI	2021-10-05
KAN705-5	RPE-hTERT	+ 10 µM nocodazole	Serum starved for 8 hours. Fixed in 4% PFA at RT for 15 minutes.	Myosin Va, sc-365986, Santa Cruz, 1:1000	Rab34, 27435-1-AP, Proteintech, 1:1000	CEP170, Invitrogen, 41-3200, 1:1000	DAPI	2021-10-05
KAN705-6	RPE-hTERT	+DMSO	Serum starved for 24 hours. Fixed in 4% PFA at RT for 15 minutes.	Myosin Va, sc-365986, Santa Cruz, 1:1000	Rab34, 27435-1-AP, Proteintech, 1:1000	CEP170, Invitrogen, 41-3200, 1:1000	DAPI	2021-10-05
KAN705-7	RPE-hTERT	+ 10 µM nocodazole	Serum starved for 24 hours. Fixed in 4% PFA at RT for 15 minutes.	Myosin Va, sc-365986, Santa Cruz, 1:1000	Rab34, 27435-1-AP, Proteintech, 1:1000	CEP170, Invitrogen, 41-3200, 1:1000	DAPI	2021-10-05
Replicate 3
KAN710-1	RPE-hTERT		confluent, Fixed in 4% PFA at RT for 15 minutes.	Myosin Va, sc-365986, Santa Cruz, 1:1000	Rab34, 27435-1-AP, Proteintech, 1:1000	CEP170, Invitrogen, 41-3200, 1:1000	DAPI	2021-10-08
KAN710-2	RPE-hTERT	+DMSO	Serum starved for 3 hours. Fixed in 4% PFA at RT for 15 minutes.	Myosin Va, sc-365986, Santa Cruz, 1:1000	Rab34, 27435-1-AP, Proteintech, 1:1000	CEP170, Invitrogen, 41-3200, 1:1000	DAPI	2021-10-08
KAN710-3	RPE-hTERT	+ 10 µM nocodazole	Serum starved for 3 hours. Fixed in 4% PFA at RT for 15 minutes.	Myosin Va, sc-365986, Santa Cruz, 1:1000	Rab34, 27435-1-AP, Proteintech, 1:1000	CEP170, Invitrogen, 41-3200, 1:1000	DAPI	2021-10-08
KAN710-4	RPE-hTERT	+DMSO	Serum starved for 8 hours. Fixed in 4% PFA at RT for 15 minutes.	Myosin Va, sc-365986, Santa Cruz, 1:1000	Rab34, 27435-1-AP, Proteintech, 1:1000	CEP170, Invitrogen, 41-3200, 1:1000	DAPI	2021-10-08
KAN710-5	RPE-hTERT	+ 10 µM nocodazole	Serum starved for 8 hours. Fixed in 4% PFA at RT for 15 minutes.	Myosin Va, sc-365986, Santa Cruz, 1:1000	Rab34, 27435-1-AP, Proteintech, 1:1000	CEP170, Invitrogen, 41-3200, 1:1000	DAPI	2021-10-08
KAN710-6	RPE-hTERT	+DMSO	Serum starved for 24 hours. Fixed in 4% PFA at RT for 15 minutes.	Myosin Va, sc-365986, Santa Cruz, 1:1000	Rab34, 27435-1-AP, Proteintech, 1:1000	CEP170, Invitrogen, 41-3200, 1:1000	DAPI	2021-10-08
KAN710-7	RPE-hTERT	+ 10 µM nocodazole	Serum starved for 24 hours. Fixed in 4% PFA at RT for 15 minutes.	Myosin Va, sc-365986, Santa Cruz, 1:1000	Rab34, 27435-1-AP, Proteintech, 1:1000	CEP170, Invitrogen, 41-3200, 1:1000	DAPI	2021-10-08

## Sheet: Total
	0 hour	3 hour s.s. + DMSO	8 hour s.s. + DMSO	24 hour s.s. + DMSO				0 hour	3 hour s.s. + nocodazole	8 hour s.s. + nocodazole	24 hour s.s. + nocodazole
KAN499	21.7949	28.2353	32.6733	26.6667			KAN499	21.7949	2.32558	4.34783	4.30108
KAN704	25.6098	26.2774	21.6418	16.9014			KAN704	25.6098	2.45902	0.943396	1.73913
KAN709	24.1379	24.4186	15.7576	14.557			KAN709	24.1379	0.819672	0.970874	1.5873
Total	23.8475	26.3104	23.3575	19.375			Total	23.8475	1.86809	2.08737	2.5425
S.E.M.	1.11079	1.10191	4.95792	3.70811			S.E.M.	1.11079	0.525622	1.13026	0.880378
DMSO							Nocodazole
	KAN499	KAN704	KAN709	Total	S.E.M.			KAN499	KAN704	KAN709	Total	S.E.M.
0 hour	21.7949	25.6098	24.1379	23.8475	1.11079		0 hour	21.7949	25.6098	24.1379	23.8475	1.11079
3 hour s.s. + DMSO	28.2353	26.2774	24.4186	26.3104	1.10191		3 hour s.s. + nocodazole	2.32558	2.45902	0.819672	1.86809	0.525622
8 hour s.s. + DMSO	32.6733	21.6418	15.7576	23.3575	4.95792		8 hour s.s. + nocodazole	4.34783	0.943396	0.970874	2.08737	1.13026
24 hour s.s. + DMSO	26.6667	16.9014	14.557	19.375	3.70811		24 hour s.s. + nocodazole	4.30108	1.73913	1.5873	2.5425	0.880378

## Sheet: Statistics
			Multiple unpaired t test
Table Analyzed	Data 1			Discovery?	P value	Mean of DMSO	Mean of Nocodazole	Difference	SE of difference	t ratio	df	q value
			DMSO v.s. Noc (0h)	No	>0.999999	23.85	23.85	0	1.571	0	4	0.7575
Column A	DMSO		DMSO v.s. Noc (3h)	Yes	0.000362	26.31	1.868	24.44	1.221	20.02	2.865	0.001096
vs.	vs.		DMSO v.s. Noc (8h)	No	0.044293	23.36	2.087	21.27	5.085	4.183	2.207	0.044736
Column B	Nocodazole		DMSO v.s. Noc (24h)	No	0.039086	19.38	2.543	16.83	3.811	4.417	2.225	0.044736
Test details
Test name	Unpaired t test with Welch correction
Variance assumption	Individual variance for each group
Multiple comparisons	False Discovery Rate (FDR)
Method	Two-stage step-up (Benjamini, Krieger, and Yekutieli)
Desired FDR (Q)	1.00%
Number of tests performed	4
Number of rows omitted	0
