# Supplementary material for: Myristoylated Neuronal Calcium Sensor-1 captures the preciliary vesicle at distal appendages
Source: eLife. 2025 Jan 30;14:e85998. doi: 10.7554/eLife.85998 (PMC11984960; doi:10.7554/eLife.85998)
Supplement: Figure 6—source data 4. [file elife-85998-fig6-data4.xlsx]

## Sheet: Replicate No.1 (KAN703)
	Label	Area	Mean	Min	Max	X	Y	Circ	IntDen	RawIntDen	AR	Round	Solidity
723	NCS1_KAN703-1_1.tif:0001-0070	1.585	11.878	0	79	2.324	7.94	0.959	18.821	1461	1.123	0.89	0.972	0.239984
724	NCS1_KAN703-1_1.tif:0002-0205	1.907	89.007	0	777	79.672	23.27	0.944	169.698	13173	1.183	0.845	0.949	2.1638
725	NCS1_KAN703-1_1.tif:0003-0294	1.739	70.348	0	552	40.343	33.372	0.766	122.343	9497	2.123	0.471	0.996	1.55998
726	NCS1_KAN703-1_1.tif:0004-0308	2.886	91.625	0	1058	114.959	35.065	0.726	264.395	20524	1.881	0.532	0.887	3.37127
727	NCS1_KAN703-1_1.tif:0005-0314	1.868	101.986	0	560	68.618	35.645	0.911	190.503	14788	1.168	0.856	0.97	2.42908
728	NCS1_KAN703-1_1.tif:0006-0349	1.752	16.574	0	186	13.868	39.625	0.941	29.037	2254	1.208	0.828	0.935	0.370242
729	NCS1_KAN703-1_1.tif:0007-0377	1.688	34.847	0	171	143.784	42.818	0.942	58.807	4565	1.221	0.819	0.942	0.749847
730	NCS1_KAN703-1_1.tif:0008-0469	1.778	21.145	0	111	89.588	53.283	0.981	37.59	2918	1.057	0.946	0.936	0.479311
731	NCS1_KAN703-1_1.tif:0009-0591	1.739	27.281	0	202	58.84	67.129	0.929	47.445	3683	1.188	0.841	0.975	0.60497
732	NCS1_KAN703-1_1.tif:0010-0665	1.585	24.423	0	146	122.554	75.524	0.948	38.698	3004	1.312	0.762	0.946	0.493437
733	NCS1_KAN703-1_1.tif:0011-0720	1.507	39.248	0	444	15.515	81.774	0.912	59.155	4592	1.328	0.753	0.963	0.754282
734	NCS1_KAN703-1_1.tif:0012-0728	2.061	64.575	0	383	35.819	82.614	0.889	133.099	10332	1.174	0.852	0.952	1.69713
735	NCS1_KAN703-1_1.tif:0013-0806	1.958	67.625	0	694	18.017	91.49	0.77	132.417	10279	1.524	0.656	0.874	1.68843
736	NCS1_KAN703-1_1.tif:0014-0933	1.688	19.901	0	176	57.306	105.913	0.953	33.584	2607	1.114	0.898	0.967	0.428226
737	NCS1_KAN703-1_1.tif:0015-0978	1.494	18.612	0	116	143.577	111.017	0.894	27.813	2159	1.486	0.673	0.928	0.354637
738	NCS1_KAN703-1_1.tif:0016-0979	2.19	22.959	0	259	81.248	111.194	0.891	50.279	3903	1.202	0.832	0.95	0.641107
739	NCS1_KAN703-1_1.tif:0017-1069	2.332	51.249	0	502	109.646	121.433	0.779	119.496	9276	1.854	0.539	0.898	1.52368
740	NCS1_KAN703-1_2.tif:0001-0059	1.546	14.75	0	109	114.115	6.668	0.936	22.802	1770	1.081	0.925	0.96	0.29074
741	NCS1_KAN703-1_2.tif:0002-0188	1.765	63.964	0	659	9.846	21.41	0.874	112.887	8763	1.457	0.687	0.923	1.43941
742	NCS1_KAN703-1_2.tif:0003-0204	1.494	8.086	0	48	76.444	23.132	0.96	12.084	938	1.118	0.895	0.943	0.154076
743	NCS1_KAN703-1_2.tif:0004-0378	2.1	28.896	0	210	100.391	42.944	0.966	60.675	4710	1.131	0.884	0.945	0.773665
744	NCS1_KAN703-1_2.tif:0005-0390	1.623	14.333	0	245	13.887	44.287	0.892	23.265	1806	1.41	0.709	0.955	0.296654
745	NCS1_KAN703-1_2.tif:0006-0390	1.366	8.208	0	40	108.8	44.335	0.944	11.208	870	1.22	0.82	0.951	0.142906
746	NCS1_KAN703-1_2.tif:0007-0539	2.126	6.455	0	44	49.924	61.185	0.809	13.72	1065	1.871	0.534	0.917	0.174937
747	NCS1_KAN703-1_2.tif:0008-0595	2.023	53.828	0	355	11.185	67.575	0.843	108.868	8451	1.737	0.576	0.932	1.38816
748	NCS1_KAN703-1_2.tif:0009-0631	1.997	15.845	0	71	111.919	71.72	0.929	31.639	2456	1.203	0.831	0.948	0.403423
749	NCS1_KAN703-1_2.tif:0010-0648	2.499	67.701	0	369	65.798	73.533	0.835	169.195	13134	1.438	0.696	0.909	2.15739
750	NCS1_KAN703-1_2.tif:0011-0681	1.804	15.364	0	90	82.373	77.323	0.917	27.71	2151	1.254	0.797	0.94	0.353323
751	NCS1_KAN703-1_2.tif:0012-0818	1.868	10.683	0	230	25.213	92.925	0.915	19.955	1549	1.261	0.793	0.932	0.254439
752	NCS1_KAN703-1_2.tif:0013-0984	1.752	20.574	0	134	140.1	111.71	0.951	36.045	2798	1.196	0.836	0.958	0.4596
753	NCS1_KAN703-1_2.tif:0014-1002	1.855	15.618	0	114	125.284	113.819	0.872	28.972	2249	1.433	0.698	0.95	0.369421
754	NCS1_KAN703-1_2.tif:0015-1025	1.301	14.505	0	66	89.722	116.371	0.972	18.872	1465	1.139	0.878	0.967	0.240641
755	NCS1_KAN703-1_3.tif:0001-0146	2.1	36.135	0	231	22.821	16.575	0.919	75.876	5890	1.39	0.72	0.945	0.967492
756	NCS1_KAN703-1_3.tif:0002-0297	1.7	29.417	0	245	99.384	33.73	0.977	50.022	3883	1.121	0.892	0.946	0.637822
757	NCS1_KAN703-1_3.tif:0003-0316	2.435	58.815	0	568	122.6	35.955	0.858	143.199	11116	1.608	0.622	0.936	1.82591
758	NCS1_KAN703-1_3.tif:0004-0419	1.855	10.868	0	85	41.19	47.546	0.969	20.161	1565	1.218	0.821	0.95	0.257067
759	NCS1_KAN703-1_3.tif:0005-0462	2.319	93.311	0	823	100.129	52.395	0.871	216.37	16796	1.475	0.678	0.947	2.75891
760	NCS1_KAN703-1_3.tif:0006-0652	2.01	39.141	0	426	116.65	74.073	0.935	78.659	6106	1.173	0.853	0.951	1.00297
761	NCS1_KAN703-1_3.tif:0007-0692	1.533	8.857	0	61	17.744	78.615	0.891	13.578	1054	1.293	0.773	0.922	0.17313
762	NCS1_KAN703-1_3.tif:0008-0708	1.417	5.509	0	30	12.085	80.413	0.98	7.807	606	1.096	0.912	0.961	0.0995416
763	NCS1_KAN703-1_3.tif:0009-0823	2.37	99.402	0	1068	49.588	93.396	0.854	235.616	18290	1.25	0.8	0.911	3.00432
764	NCS1_KAN703-1_3.tif:0010-0851	1.662	10.744	0	71	79.973	96.654	0.939	17.855	1386	1.181	0.847	0.959	0.227664
765	NCS1_KAN703-1_3.tif:0011-0996	1.997	80.845	0	745	10.58	113.027	0.905	161.427	12531	1.316	0.76	0.942	2.05834
766	NCS1_KAN703-1_3.tif:0012-1069	1.778	10.21	0	95	91.591	121.37	0.965	18.151	1409	1.149	0.87	0.955	0.231442
767	NCS1_KAN703-1_3.tif:0013-1231	1.52	15.907	0	172	127.105	139.75	0.825	24.18	1877	1.57	0.637	0.894	0.308316
768	NCS1_KAN703-1_4.tif:0001-0006	1.675	115.062	0	1026	117.814	0.67	0.748	192.693	14958	2.081	0.48	0.935	2.457
769	NCS1_KAN703-1_4.tif:0002-0048	1.842	32.021	0	155	27.218	5.453	0.937	58.988	4579	1.24	0.807	0.947	0.752147
770	NCS1_KAN703-1_4.tif:0003-0198	1.971	13.222	0	72	113.726	22.456	0.941	26.061	2023	1.086	0.921	0.944	0.332298
771	NCS1_KAN703-1_4.tif:0004-0273	1.907	13.662	0	70	44.513	31.071	0.864	26.048	2022	1.4	0.714	0.928	0.332134
772	NCS1_KAN703-1_4.tif:0005-0377	1.765	6.526	0	32	65.463	42.794	0.958	11.517	894	1.076	0.929	0.958	0.146848
773	NCS1_KAN703-1_4.tif:0006-0379	1.907	87.527	0	811	90.867	43.072	0.92	166.877	12954	1.272	0.786	0.955	2.12782
774	NCS1_KAN703-1_4.tif:0007-0467	1.958	45.25	0	524	123.177	52.958	0.796	88.604	6878	1.422	0.703	0.913	1.12978
775	NCS1_KAN703-1_4.tif:0008-0711	2.151	52.521	0	470	48.661	80.723	0.866	112.99	8771	1.308	0.765	0.913	1.44072
776	NCS1_KAN703-1_4.tif:0009-0729	2.048	7.862	0	59	78.342	82.754	0.893	16.103	1250	1.218	0.821	0.975	0.205325
777	NCS1_KAN703-1_4.tif:0010-0752	1.958	62.414	0	276	15.461	85.381	0.866	122.214	9487	1.418	0.705	0.93	1.55834
778	NCS1_KAN703-1_4.tif:0011-0796	1.804	19.836	0	84	101.1	90.38	0.953	35.774	2777	1.174	0.852	0.969	0.45615
779	NCS1_KAN703-1_4.tif:0012-1003	2.293	82.41	0	825	47.562	113.84	0.902	188.97	14669	1.114	0.897	0.944	2.40953
780	NCS1_KAN703-1_4.tif:0013-1044	1.958	50.039	0	318	120.033	118.495	0.911	97.982	7606	1.26	0.794	0.944	1.24936
781	NCS1_KAN703-1_4.tif:0014-1069	1.507	20.06	0	98	128.116	121.358	0.956	30.235	2347	1.155	0.866	0.925	0.385518
782	NCS1_KAN703-1_5.tif:0001-0031	2.242	38.534	0	320	58.468	3.51	0.853	86.375	6705	1.628	0.614	0.918	1.10136
783	NCS1_KAN703-1_5.tif:0002-0049	2.576	99.095	0	744	44.736	5.527	0.729	255.313	19819	2.282	0.438	0.959	3.25547
784	NCS1_KAN703-1_5.tif:0003-0252	1.881	18.432	0	110	126.028	28.644	0.907	34.666	2691	1.093	0.915	0.945	0.442024
785	NCS1_KAN703-1_5.tif:0004-0336	1.945	21.119	0	97	90.319	38.163	0.928	41.082	3189	1.247	0.802	0.941	0.523825
786	NCS1_KAN703-1_5.tif:0005-0339	2.396	74.839	0	1172	47.402	38.518	0.79	179.321	13920	1.36	0.735	0.888	2.2865
787	NCS1_KAN703-1_5.tif:0006-0494	2.19	46.035	0	395	9.814	56.016	0.891	100.817	7826	1.271	0.787	0.955	1.2855
788	NCS1_KAN703-1_5.tif:0007-0530	1.327	21.689	0	113	102.266	60.19	0.947	28.779	2234	1.203	0.832	0.945	0.366957
789	NCS1_KAN703-1_5.tif:0008-0594	2.77	17.023	0	102	104.645	67.477	0.78	47.149	3660	1.512	0.661	0.892	0.601192
790	NCS1_KAN703-1_5.tif:0009-0603	1.366	17.33	0	127	45.759	68.428	0.904	23.665	1837	1.304	0.767	0.914	0.301746
791	NCS1_KAN703-1_5.tif:0010-0602	1.404	22.917	0	108	136.369	68.392	0.971	32.18	2498	1.04	0.962	0.96	0.410322
792	NCS1_KAN703-1_5.tif:0011-0660	2.551	53.854	0	700	70.807	75.003	0.816	137.363	10663	1.208	0.828	0.894	1.75151
793	NCS1_KAN703-1_5.tif:0012-0802	1.675	11.377	0	66	132.115	91.051	0.946	19.053	1479	1.134	0.882	0.963	0.242941
794	NCS1_KAN703-1_5.tif:0013-0806	2.486	36.933	0	332	105.793	91.479	0.916	91.825	7128	1.271	0.787	0.926	1.17085
795	NCS1_KAN703-1_5.tif:0014-0868	1.507	19.239	0	58	9.239	98.497	0.94	28.998	2251	1.175	0.851	0.955	0.369749
796	NCS1_KAN703-1_5.tif:0015-0895	1.456	23.345	0	124	131.149	101.657	0.976	33.983	2638	1.001	0.999	0.974	0.433318
797	NCS1_KAN703-1_5.tif:0016-0911	1.623	23.23	0	98	38.594	103.41	0.943	37.706	2927	1.118	0.894	0.951	0.480789
798	NCS1_KAN703-1_5.tif:0017-0986	2.242	29.523	0	304	70.607	111.987	0.861	66.176	5137	1.383	0.723	0.938	0.843804
799	NCS1_KAN703-1_5.tif:0018-1182	1.997	66.742	0	652	92.344	134.205	0.953	133.267	10345	1.092	0.916	0.945	1.69927
800	NCS1_KAN703-1_5.tif:0019-1235	2.1	84.202	0	697	3.972	140.199	0.875	176.809	13725	1.276	0.784	0.924	2.25447
801	NCS1_KAN703-1_6.tif:0001-0048	2.628	12.24	0	107	126.427	5.532	0.786	32.167	2497	1.863	0.537	0.907	0.410157
802	NCS1_KAN703-1_6.tif:0002-0050	1.585	105.089	0	603	7.736	5.782	0.781	166.516	12926	1.774	0.564	0.953	2.12323
803	NCS1_KAN703-1_6.tif:0003-0122	2.048	16.792	0	107	70.808	13.899	0.919	34.396	2670	1.189	0.841	0.935	0.438574
804	NCS1_KAN703-1_6.tif:0004-0238	1.61	17.328	0	89	107.495	27.007	0.91	27.903	2166	1.114	0.898	0.943	0.355787
805	NCS1_KAN703-1_6.tif:0005-0371	2.692	114.746	0	1277	54.308	42.106	0.802	308.942	23982	1.704	0.587	0.909	3.93928
806	NCS1_KAN703-1_6.tif:0006-0479	1.726	15.067	0	150	90.609	54.361	0.912	26.009	2019	1.333	0.75	0.95	0.331641
807	NCS1_KAN703-1_6.tif:0007-0562	2.01	44.032	0	305	2.819	63.816	0.935	88.488	6869	1.112	0.899	0.943	1.1283
808	NCS1_KAN703-1_6.tif:0008-0576	1.366	34.896	0	131	44.806	65.49	0.851	47.651	3699	1.467	0.682	0.914	0.607598
809	NCS1_KAN703-1_6.tif:0009-0670	2.087	24.63	0	196	119.871	76.047	0.95	51.4	3990	1.207	0.828	0.934	0.655398
810	NCS1_KAN703-1_6.tif:0010-0706	1.662	72.643	0	417	37.689	80.159	0.888	120.72	9371	1.447	0.691	0.963	1.53928
811	NCS1_KAN703-1_6.tif:0011-0728	2.461	49.12	0	319	90.075	82.65	0.848	120.861	9382	1.533	0.652	0.912	1.54109
812	NCS1_KAN703-1_6.tif:0012-0820	2.319	17.944	0	98	79.299	93.077	0.98	41.61	3230	1.136	0.88	0.955	0.53056
813	NCS1_KAN703-1_6.tif:0013-0864	2.138	31.187	0	355	138.233	98.159	0.87	66.691	5177	1.207	0.829	0.938	0.850374
814	NCS1_KAN703-1_6.tif:0014-0967	1.288	13.11	0	77	36.987	109.831	0.962	16.889	1311	1.242	0.805	0.971	0.215345
815	NCS1_KAN703-1_6.tif:0015-0968	2.023	77.618	0	694	79.79	109.896	0.831	156.983	12186	1.525	0.656	0.949	2.00167
816	NCS1_KAN703-1_6.tif:0016-0974	1.404	46.404	0	360	58.48	110.538	0.913	65.158	5058	1.256	0.796	0.965	0.830827
817	NCS1_KAN703-1_6.tif:0017-1008	1.623	23.27	0	282	114.679	114.466	0.943	37.771	2932	1.319	0.758	0.958	0.48161
818	NCS1_KAN703-1_6.tif:0018-1042	1.688	5.405	0	27	19.567	118.293	0.969	9.121	708	1.168	0.857	0.942	0.116296
819	NCS1_KAN703-1_6.tif:0019-1221	1.726	95.284	0	964	36.959	138.736	0.878	164.481	12768	1.071	0.934	0.924	2.09727
										6087.91				1
820	NCS1_KAN703-2_1.tif:0001-0042	2.19	80.647	0	418	40.942	4.747	0.861	176.616	13710	1.568	0.638	0.944	2.25201
821	NCS1_KAN703-2_1.tif:0002-0093	1.391	24.602	0	88	144.402	10.549	0.993	34.228	2657	1.208	0.828	0.964	0.436439
822	NCS1_KAN703-2_1.tif:0003-0160	2.332	69.453	0	494	24.398	18.234	0.821	161.943	12571	1.767	0.566	0.912	2.06491
823	NCS1_KAN703-2_1.tif:0004-0161	1.443	24.393	0	117	1.603	18.322	0.927	35.194	2732	1.379	0.725	0.949	0.448758
824	NCS1_KAN703-2_1.tif:0005-0183	2.937	84.355	0	1202	113.829	20.748	0.841	247.764	19233	1.472	0.679	0.931	3.15921
825	NCS1_KAN703-2_1.tif:0006-0202	1.881	95.486	0	572	64.577	22.957	0.862	179.591	13941	1.363	0.733	0.936	2.28995
826	NCS1_KAN703-2_1.tif:0007-0224	2.602	92.535	0	1540	78.547	25.434	0.724	240.795	18692	1.66	0.602	0.858	3.07035
827	NCS1_KAN703-2_1.tif:0008-0311	2.332	84.138	0	351	82.734	35.274	0.908	196.184	15229	1.216	0.823	0.919	2.50152
828	NCS1_KAN703-2_1.tif:0009-0344	2.396	57.575	0	234	119.926	39.112	0.79	137.956	10709	1.923	0.52	0.925	1.75906
829	NCS1_KAN703-2_1.tif:0010-0384	2.37	77.723	0	544	33.055	43.551	0.882	184.229	14301	1.24	0.806	0.932	2.34908
830	NCS1_KAN703-2_1.tif:0011-0403	2.95	103.76	0	891	98.894	45.829	0.796	306.095	23761	1.671	0.599	0.94	3.90298
831	NCS1_KAN703-2_1.tif:0012-0441	2.576	63.915	0	351	68.438	49.981	0.832	164.674	12783	1.399	0.715	0.928	2.09974
832	NCS1_KAN703-2_1.tif:0013-0630	2.242	100.552	0	1406	137.059	71.569	0.925	225.388	17496	1.142	0.876	0.946	2.87389
833	NCS1_KAN703-2_1.tif:0014-0757	2.538	74.376	0	801	79.105	85.902	0.874	188.751	14652	1.377	0.726	0.931	2.40674
834	NCS1_KAN703-2_1.tif:0015-0781	2.216	141.256	0	1495	88.029	88.616	0.901	312.987	24296	1.082	0.924	0.942	3.99086
835	NCS1_KAN703-2_1.tif:0016-0828	1.907	77.081	0	444	27.602	93.953	0.92	146.961	11408	1.149	0.871	0.952	1.87388
836	NCS1_KAN703-2_1.tif:0017-0901	2.254	120.983	0	1483	101.297	102.325	0.917	272.743	21172	1.294	0.773	0.972	3.47771
837	NCS1_KAN703-2_1.tif:0018-0966	1.855	106.16	0	911	122.096	109.632	0.929	196.931	15287	1.053	0.949	0.966	2.51104
838	NCS1_KAN703-2_1.tif:0019-1004	2.048	14.987	0	85	91.614	114.037	0.896	30.698	2383	1.181	0.847	0.93	0.391432
839	NCS1_KAN703-2_1.tif:0020-1027	2.023	137.121	0	1498	57.556	116.658	0.941	277.329	21528	1.169	0.855	0.957	3.53619
840	NCS1_KAN703-2_1.tif:0021-1117	1.353	14.029	0	95	119.266	126.808	0.896	18.976	1473	1.467	0.682	0.925	0.241955
841	NCS1_KAN703-2_2.tif:0001-0010	2.37	14.723	0	84	16.084	1.137	0.945	34.898	2709	1.05	0.952	0.948	0.444981
842	NCS1_KAN703-2_2.tif:0002-0058	2.873	115.529	0	1588	24.591	6.577	0.863	331.885	25763	1.368	0.731	0.949	4.23183
843	NCS1_KAN703-2_2.tif:0003-0175	2.087	119.142	0	1055	64.583	19.9	0.946	248.64	19301	1.121	0.892	0.956	3.17038
844	NCS1_KAN703-2_2.tif:0004-0280	1.778	110.638	0	827	101.709	31.756	0.914	196.686	15268	1.156	0.865	0.945	2.50792
845	NCS1_KAN703-2_2.tif:0005-0347	1.559	27.554	0	101	64.877	39.473	0.906	42.949	3334	1.239	0.807	0.931	0.547643
846	NCS1_KAN703-2_2.tif:0006-0367	2.216	50.023	0	422	26.881	41.684	0.872	110.839	8604	1.172	0.853	0.92	1.41329
847	NCS1_KAN703-2_2.tif:0007-0392	2.113	24.683	0	127	49.811	44.489	0.948	52.147	4048	1.158	0.863	0.943	0.664925
848	NCS1_KAN703-2_2.tif:0008-0411	1.572	26.975	0	109	73.654	46.697	0.898	42.395	3291	1.324	0.756	0.972	0.54058
849	NCS1_KAN703-2_2.tif:0009-0456	1.597	16.032	0	156	8.048	51.77	0.791	25.61	1988	1.503	0.665	0.873	0.326549
850	NCS1_KAN703-2_2.tif:0010-0554	2.061	16.225	0	109	132.761	62.92	0.959	33.442	2596	1.114	0.898	0.955	0.426419
851	NCS1_KAN703-2_2.tif:0011-0610	2.937	122.342	0	1803	96.684	69.232	0.841	359.338	27894	1.565	0.639	0.954	4.58187
852	NCS1_KAN703-2_2.tif:0012-0735	2.28	125.576	0	1049	55.689	83.393	0.918	286.334	22227	1.074	0.931	0.941	3.65101
853	NCS1_KAN703-2_2.tif:0013-0743	3.066	100.336	0	1085	21.751	84.367	0.846	307.628	23880	1.502	0.666	0.914	3.92253
854	NCS1_KAN703-2_2.tif:0014-0769	2.435	16.143	0	77	129.919	87.311	0.877	39.304	3051	1.266	0.79	0.92	0.501157
855	NCS1_KAN703-2_2.tif:0015-0872	1.804	20.7	0	302	48.245	99.069	0.907	37.333	2898	1.435	0.697	0.933	0.476026
856	NCS1_KAN703-2_2.tif:0016-0877	2.319	44.878	0	393	100.661	99.506	0.824	104.063	8078	1.248	0.801	0.911	1.32689
857	NCS1_KAN703-2_2.tif:0017-1075	2.77	31.474	0	285	82.679	121.996	0.812	87.174	6767	1.451	0.689	0.888	1.11155
858	NCS1_KAN703-2_2.tif:0018-1142	2.074	8.019	0	87	122.912	129.618	0.908	16.631	1291	1.339	0.747	0.933	0.21206
859	NCS1_KAN703-2_3.tif:0001-0025	1.288	25.65	0	136	141.206	2.826	0.919	33.043	2565	1.415	0.707	0.939	0.421327
860	NCS1_KAN703-2_3.tif:0002-0063	2.538	88.467	0	930	100.605	7.098	0.855	224.512	17428	1.653	0.605	0.949	2.86272
861	NCS1_KAN703-2_3.tif:0003-0149	2.061	19.244	0	87	130.104	16.891	0.925	39.664	3079	1.409	0.71	0.947	0.505757
862	NCS1_KAN703-2_3.tif:0004-0199	2.757	110.308	0	1251	28.434	22.618	0.882	304.098	23606	1.533	0.652	0.949	3.87752
863	NCS1_KAN703-2_3.tif:0005-0302	2.229	130.162	0	1433	100.385	34.321	0.952	290.083	22518	1.154	0.866	0.958	3.69881
864	NCS1_KAN703-2_3.tif:0006-0374	2.924	104.317	0	1283	130.762	42.512	0.84	305.052	23680	1.605	0.623	0.93	3.88968
865	NCS1_KAN703-2_3.tif:0007-0485	2.525	50.301	0	510	88.483	55.02	0.851	127.006	9859	1.271	0.787	0.922	1.61944
866	NCS1_KAN703-2_3.tif:0008-0508	2.332	42.066	0	452	38.541	57.661	0.917	98.085	7614	1.073	0.932	0.948	1.25068
867	NCS1_KAN703-2_3.tif:0009-0626	2.873	60.399	0	541	32.75	71.005	0.822	173.511	13469	1.778	0.562	0.955	2.21242
868	NCS1_KAN703-2_3.tif:0010-0633	2.293	19.365	0	100	92.986	71.886	0.924	44.405	3447	1.256	0.796	0.954	0.566204
869	NCS1_KAN703-2_3.tif:0011-0726	2.963	172.752	0	1799	96.834	82.518	0.858	511.851	39733	1.277	0.783	0.924	6.52654
870	NCS1_KAN703-2_3.tif:0012-0729	1.688	8.626	0	72	144.553	82.69	0.814	14.557	1130	1.553	0.644	0.939	0.185614
871	NCS1_KAN703-2_3.tif:0013-0855	2.692	16.531	0	83	24.193	97.06	0.911	44.508	3455	1.234	0.81	0.933	0.567519
872	NCS1_KAN703-2_3.tif:0014-0872	2.718	94.711	0	1515	110.01	98.992	0.771	257.439	19984	1.563	0.64	0.87	3.28257
873	NCS1_KAN703-2_3.tif:0015-0909	1.907	108.716	0	582	37.208	103.168	0.887	207.275	16090	1.473	0.679	0.94	2.64294
874	NCS1_KAN703-2_3.tif:0016-0964	1.997	11.065	0	54	64.906	109.443	0.929	22.093	1715	1.291	0.774	0.951	0.281706
875	NCS1_KAN703-2_3.tif:0017-1008	2.525	16.663	0	96	98.687	114.435	0.862	42.073	3266	1.495	0.669	0.929	0.536473
876	NCS1_KAN703-2_4.tif:0001-0142	1.481	23.539	0	96	40.061	16.193	0.952	34.872	2707	1.117	0.895	0.95	0.444652
877	NCS1_KAN703-2_4.tif:0002-0145	2.937	104.526	0	1494	116.353	16.392	0.841	307.01	23832	1.486	0.673	0.936	3.91465
878	NCS1_KAN703-2_4.tif:0003-0172	2.744	44.563	0	460	94.076	19.558	0.87	122.278	9492	1.105	0.905	0.914	1.55916
879	NCS1_KAN703-2_4.tif:0004-0342	2.615	66.138	0	992	13.967	38.882	0.779	172.957	13426	1.569	0.638	0.894	2.20536
880	NCS1_KAN703-2_4.tif:0005-0385	2.383	80.341	0	895	48.747	43.76	0.907	191.469	14863	1.154	0.866	0.949	2.4414
881	NCS1_KAN703-2_4.tif:0006-0478	1.816	7.766	0	33	38.123	54.27	0.934	14.106	1095	1.063	0.941	0.959	0.179865
882	NCS1_KAN703-2_4.tif:0007-0518	2.396	99.618	0	682	72.231	58.834	0.891	238.695	18529	1.379	0.725	0.937	3.04357
883	NCS1_KAN703-2_4.tif:0008-0569	2.911	27.075	0	172	11.744	64.622	0.843	78.827	6119	1.687	0.593	0.942	1.00511
884	NCS1_KAN703-2_4.tif:0009-0582	2.77	90.842	0	964	98.758	66.133	0.879	251.603	19531	1.294	0.773	0.923	3.20816
885	NCS1_KAN703-2_4.tif:0010-0759	2.254	150	0	1909	46.782	86.205	0.887	338.159	26250	1.283	0.78	0.949	4.31183
886	NCS1_KAN703-2_4.tif:0011-0783	2.448	103.805	0	1270	97.215	88.954	0.91	254.077	19723	1.083	0.923	0.934	3.2397
887	NCS1_KAN703-2_4.tif:0012-0806	2.023	71.013	0	501	6.557	91.476	0.894	143.624	11149	1.151	0.868	0.952	1.83134
888	NCS1_KAN703-2_4.tif:0013-0850	2.177	74.757	0	743	121.332	96.552	0.907	162.754	12634	1.184	0.844	0.96	2.07526
889	NCS1_KAN703-2_4.tif:0014-0923	1.829	75.373	0	625	90.161	104.822	0.916	137.879	10703	1.095	0.913	0.966	1.75808
890	NCS1_KAN703-2_4.tif:0015-1021	2.023	69.287	0	674	19.261	115.894	0.872	140.133	10878	1.227	0.815	0.94	1.78682
891	NCS1_KAN703-2_4.tif:0016-1033	1.546	15.167	0	107	74.84	117.227	0.936	23.446	1820	1.084	0.922	0.96	0.298953
892	NCS1_KAN703-2_4.tif:0017-1074	2.113	19.689	0	193	141.462	121.956	0.902	41.597	3229	1.395	0.717	0.953	0.530396
893	NCS1_KAN703-2_5.tif:0001-0007	1.7	130.674	0	1397	37.31	0.819	0.909	222.206	17249	1.184	0.844	0.971	2.83332
894	NCS1_KAN703-2_5.tif:0002-0053	1.726	126.843	0	1243	122.201	6.04	0.991	218.96	16997	1.121	0.892	0.954	2.79193
895	NCS1_KAN703-2_5.tif:0003-0075	2.19	58.294	0	667	89.7	8.51	0.935	127.663	9910	1.081	0.925	0.955	1.62782
896	NCS1_KAN703-2_5.tif:0004-0140	1.649	16.094	0	90	27.282	15.944	0.931	26.537	2060	1.205	0.83	0.959	0.338376
897	NCS1_KAN703-2_5.tif:0005-0306	1.585	20.911	0	95	132.389	34.772	0.976	33.133	2572	1.19	0.84	0.95	0.422477
898	NCS1_KAN703-2_5.tif:0006-0451	2.757	95.159	0	1020	67.538	51.233	0.839	262.334	20364	1.477	0.677	0.918	3.34499
899	NCS1_KAN703-2_5.tif:0007-0550	1.713	13.459	0	125	132.647	62.423	0.93	23.059	1790	1.233	0.811	0.947	0.294026
900	NCS1_KAN703-2_5.tif:0008-0628	2.77	75.67	0	1129	9.611	71.296	0.809	209.581	16269	1.773	0.564	0.941	2.67235
901	NCS1_KAN703-2_5.tif:0009-0646	2.37	26.321	0	116	87.431	73.259	0.902	62.389	4843	1.205	0.83	0.939	0.795511
902	NCS1_KAN703-2_5.tif:0010-0759	1.842	12.692	0	66	53.349	86.183	0.922	23.381	1815	1.08	0.926	0.963	0.298132
903	NCS1_KAN703-2_5.tif:0011-0859	1.752	17.162	0	159	48.848	97.471	0.951	30.067	2334	1.096	0.913	0.951	0.383383
904	NCS1_KAN703-2_5.tif:0012-0899	1.52	16.992	0	97	20.383	102.009	0.948	25.829	2005	1.218	0.821	0.963	0.329341
905	NCS1_KAN703-2_5.tif:0013-0947	1.997	56.923	0	656	3.256	107.524	0.905	113.66	8823	1.096	0.912	0.937	1.44927
906	NCS1_KAN703-2_5.tif:0014-0997	2.164	89.22	0	742	127.821	113.244	0.902	193.092	14989	1.25	0.8	0.939	2.46209
907	NCS1_KAN703-2_5.tif:0015-1023	1.932	91.38	0	628	69.323	116.117	0.932	176.577	13707	1.204	0.831	0.952	2.25151
908	NCS1_KAN703-2_5.tif:0016-1087	2.692	13.45	0	113	39.151	123.355	0.701	36.212	2811	2.245	0.445	0.884	0.461735
909	NCS1_KAN703-2_5.tif:0017-1133	1.675	107.862	0	613	60.592	128.586	0.92	180.635	14022	1.112	0.899	0.956	2.30325
910	NCS1_KAN703-2_5.tif:0018-1176	1.945	106.232	0	994	7.187	133.512	0.839	206.644	16041	1.37	0.73	0.924	2.6349
911	NCS1_KAN703-2_5.tif:0019-1186	2.242	57.057	0	624	88.889	134.629	0.812	127.895	9928	1.61	0.621	0.964	1.63077
912	NCS1_KAN703-2_6.tif:0001-0115	1.301	8.02	0	33	54.368	13.101	0.9	10.435	810	1.196	0.836	0.927	0.133051
913	NCS1_KAN703-2_6.tif:0002-0184	3.169	72.667	0	311	131.583	20.999	0.797	230.283	17876	1.731	0.578	0.906	2.93631
914	NCS1_KAN703-2_6.tif:0003-0251	1.894	42.116	0	203	75.69	28.483	0.963	79.754	6191	1.266	0.79	0.955	1.01693
915	NCS1_KAN703-2_6.tif:0004-0357	2.409	83.513	0	667	60.941	40.562	0.905	201.182	15617	1.334	0.75	0.964	2.56525
916	NCS1_KAN703-2_6.tif:0005-0467	2.692	11.746	0	80	117.309	53.122	0.854	31.626	2455	1.278	0.782	0.911	0.403258
917	NCS1_KAN703-2_6.tif:0006-0505	2.074	18.112	0	119	86.351	57.387	0.94	37.565	2916	1.272	0.786	0.964	0.478982
918	NCS1_KAN703-2_6.tif:0007-0516	1.816	17.624	0	134	54.972	58.545	0.934	32.012	2485	1.279	0.782	0.969	0.408186
919	NCS1_KAN703-2_6.tif:0008-0684	3.118	78.521	0	1189	119.936	77.738	0.86	244.789	19002	1.396	0.716	0.931	3.12127
920	NCS1_KAN703-2_6.tif:0009-0688	1.636	15.945	0	75	44.948	78.111	0.951	26.087	2025	1.144	0.874	0.951	0.332627
921	NCS1_KAN703-2_6.tif:0010-0753	2.383	38.389	0	316	90.475	85.506	0.928	91.49	7102	1.262	0.792	0.941	1.16657
922	NCS1_KAN703-2_6.tif:0011-0857	2.589	7.98	0	43	49.828	97.357	0.857	20.663	1604	1.439	0.695	0.916	0.263473
923	NCS1_KAN703-2_6.tif:0012-1080	1.597	7.29	0	75	42.141	122.57	0.939	11.646	904	1.084	0.923	0.976	0.148491
924	NCS1_KAN703-2_7.tif:0001-0008	1.61	29.52	0	179	16.405	0.885	0.947	47.536	3690	1.09	0.918	0.98	0.60612
925	NCS1_KAN703-2_7.tif:0002-0085	2.357	55.169	0	616	61.8	9.701	0.918	130.059	10096	1.133	0.882	0.931	1.65837
926	NCS1_KAN703-2_7.tif:0003-0086	1.816	41.156	0	189	90.334	9.827	0.934	74.756	5803	1.276	0.784	0.969	0.953201
927	NCS1_KAN703-2_7.tif:0004-0162	2.37	26.897	0	150	37.276	18.436	0.902	63.754	4949	1.325	0.755	0.941	0.812923
928	NCS1_KAN703-2_7.tif:0005-0288	1.919	98.101	0	1034	85.507	32.694	0.926	188.3	14617	1.176	0.85	0.961	2.40099
929	NCS1_KAN703-2_7.tif:0006-0298	3.027	59.647	0	780	56.95	33.847	0.826	180.571	14017	1.572	0.636	0.942	2.30243
930	NCS1_KAN703-2_7.tif:0007-0395	2.023	89.611	0	767	106.491	44.952	0.872	181.24	14069	1.145	0.873	0.935	2.31097
931	NCS1_KAN703-2_7.tif:0008-0452	1.494	21.491	0	194	49.083	51.29	0.932	32.115	2493	1.252	0.799	0.951	0.4095
932	NCS1_KAN703-2_7.tif:0009-0498	1.378	46.168	0	188	25.088	56.528	0.953	63.638	4940	1.173	0.853	0.955	0.811445
933	NCS1_KAN703-2_7.tif:0010-0550	1.662	12.372	0	70	95.589	62.436	0.954	20.56	1596	1.1	0.909	0.931	0.262159
934	NCS1_KAN703-2_7.tif:0011-0559	1.481	30.217	0	156	2.444	63.451	0.981	44.766	3475	1.122	0.892	0.954	0.570804
935	NCS1_KAN703-2_7.tif:0012-0592	2.19	11.129	0	65	85.403	67.273	0.861	24.373	1892	1.397	0.716	0.932	0.31078
936	NCS1_KAN703-2_7.tif:0013-0653	1.778	82.442	0	401	131.44	74.162	0.965	146.561	11377	1.122	0.892	0.962	1.86879
937	NCS1_KAN703-2_7.tif:0014-0711	2.035	130.165	0	1014	104.11	80.701	0.923	264.936	20566	1.119	0.894	0.949	3.37817
938	NCS1_KAN703-2_7.tif:0015-0807	2.435	91.037	0	1078	136.313	91.633	0.885	221.652	17206	1.186	0.843	0.94	2.82626
939	NCS1_KAN703-2_7.tif:0016-0840	2.01	14.564	0	94	39.192	95.42	0.959	29.268	2272	1.218	0.821	0.963	0.373199
940	NCS1_KAN703-2_7.tif:0017-0902	1.868	26.476	0	143	79.24	102.325	0.925	49.455	3839	1.296	0.771	0.954	0.630594
941	NCS1_KAN703-2_7.tif:0018-0908	1.816	71.191	0	335	11.182	103.052	0.934	129.312	10038	1.091	0.917	0.959	1.64884
942	NCS1_KAN703-2_7.tif:0019-0980	1.726	7.493	0	62	85.268	111.204	0.912	12.934	1004	1.305	0.767	0.95	0.164917
										9697.79				1.59296
943	NCS1_KAN703-3_1.tif:0001-0119	1.572	7.459	0	40	73.655	13.522	0.888	11.723	910	1.332	0.751	0.949	0.149477
944	NCS1_KAN703-3_1.tif:0002-0167	1.546	26.483	0	91	47.793	19.009	0.964	40.94	3178	1.082	0.924	0.964	0.522018
945	NCS1_KAN703-3_1.tif:0003-0198	1.791	84.324	0	435	98.92	22.47	0.972	150.993	11721	1.264	0.791	0.962	1.92529
946	NCS1_KAN703-3_1.tif:0004-0207	1.404	147.862	0	588	72.371	23.535	0.86	207.623	16117	1.508	0.663	0.969	2.64738
947	NCS1_KAN703-3_1.tif:0005-0357	2.396	157.124	0	2059	47.34	40.573	0.891	376.484	29225	1.28	0.781	0.935	4.8005
948	NCS1_KAN703-3_1.tif:0006-0645	1.804	119.421	0	585	55.107	73.216	0.979	215.378	16719	1.18	0.847	0.966	2.74626
949	NCS1_KAN703-3_1.tif:0007-0708	2.023	203.79	0	1830	122.554	80.363	0.941	412.168	31995	1.164	0.859	0.949	5.2555
950	NCS1_KAN703-3_1.tif:0008-0809	1.726	140.978	0	664	45.226	91.882	0.948	243.359	18891	1.19	0.84	0.975	3.10304
951	NCS1_KAN703-3_1.tif:0009-0841	1.404	6.376	0	37	77.919	95.497	0.677	8.953	695	2.599	0.385	0.876	0.114161
952	NCS1_KAN703-3_1.tif:0010-0846	1.61	26.288	0	124	63.251	96.065	0.936	42.331	3286	1.181	0.847	0.954	0.539759
953	NCS1_KAN703-3_1.tif:0011-0934	1.984	175.779	0	1123	96.174	106.072	0.909	348.723	27070	1.373	0.729	0.975	4.44652
954	NCS1_KAN703-3_1.tif:0012-0989	1.907	142.209	0	709	17.235	112.267	0.969	271.133	21047	1.253	0.798	0.964	3.45718
955	NCS1_KAN703-3_1.tif:0013-1185	2.087	9.105	0	55	8.989	134.461	0.913	19.001	1475	1.442	0.694	0.945	0.242284
956	NCS1_KAN703-3_2.tif:0001-0085	2.074	96.988	0	542	35.466	9.694	0.954	201.156	15615	1.14	0.878	0.944	2.56492
957	NCS1_KAN703-3_2.tif:0002-0177	2.667	116.435	0	1098	103.676	20.017	0.872	310.488	24102	1.348	0.742	0.93	3.959
958	NCS1_KAN703-3_2.tif:0003-0189	2.808	139.633	0	1414	140.607	21.505	0.847	392.136	30440	1.62	0.617	0.93	5.00008
959	NCS1_KAN703-3_2.tif:0004-0204	1.945	166.258	0	1349	11.126	23.172	0.914	323.409	25105	1.223	0.817	0.956	4.12375
960	NCS1_KAN703-3_2.tif:0005-0293	2.138	156.247	0	1087	64.309	33.247	0.922	334.127	25937	1.27	0.788	0.968	4.26041
961	NCS1_KAN703-3_2.tif:0006-0342	1.932	137.127	0	784	7.123	38.897	0.932	264.975	20569	1.371	0.73	0.968	3.37867
962	NCS1_KAN703-3_2.tif:0007-0404	3.298	107.91	0	1831	54.469	45.911	0.764	355.872	27625	1.713	0.584	0.874	4.53768
963	NCS1_KAN703-3_2.tif:0008-0484	1.842	130.741	0	861	5.311	54.929	0.962	240.847	18696	1.198	0.835	0.944	3.07101
964	NCS1_KAN703-3_2.tif:0009-0580	2.834	91.018	0	1084	131.803	65.934	0.837	257.954	20024	1.539	0.65	0.93	3.28914
965	NCS1_KAN703-3_2.tif:0010-0583	2.409	54.16	0	653	34.321	66.202	0.822	130.471	10128	1.643	0.608	0.906	1.66363
966	NCS1_KAN703-3_2.tif:0011-0685	2.151	192.88	0	1742	102.765	77.698	0.941	414.95	32211	1.023	0.978	0.954	5.29098
967	NCS1_KAN703-3_2.tif:0012-0788	2.692	14.187	0	82	96.303	89.532	0.872	38.196	2965	1.082	0.924	0.911	0.487031
968	NCS1_KAN703-3_2.tif:0013-0812	2.074	142.075	0	1244	49.326	92.145	0.917	294.669	22874	1.248	0.801	0.955	3.75728
969	NCS1_KAN703-3_2.tif:0014-0881	2.087	147.827	0	1071	138.861	100.005	0.878	308.504	23948	1.312	0.762	0.956	3.9337
970	NCS1_KAN703-3_2.tif:0015-0923	1.868	152.531	0	1469	1.852	104.848	0.901	284.917	22117	1.464	0.683	0.951	3.63294
971	NCS1_KAN703-3_2.tif:0016-1042	2.138	131.024	0	1017	60.611	118.216	0.913	280.189	21750	1.008	0.992	0.943	3.57266
972	NCS1_KAN703-3_2.tif:0017-1132	1.816	166.943	0	1103	111.406	128.492	0.886	303.235	23539	1.176	0.851	0.953	3.86652
973	NCS1_KAN703-3_2.tif:0018-1187	1.404	123.945	0	516	15.867	134.711	0.913	174.039	13510	1.247	0.802	0.96	2.21915
974	NCS1_KAN703-3_3.tif:0001-0193	2.319	31.694	0	271	128.729	21.907	0.882	73.493	5705	1.593	0.628	0.94	0.937104
975	NCS1_KAN703-3_3.tif:0002-0297	2.448	37.374	0	207	70.186	33.78	0.932	91.477	7101	1.222	0.818	0.95	1.16641
976	NCS1_KAN703-3_3.tif:0003-0414	2.808	105.45	0	809	112.349	47.076	0.806	296.137	22988	1.64	0.61	0.888	3.77601
977	NCS1_KAN703-3_3.tif:0004-0586	2.525	49.52	0	373	127.567	66.524	0.833	125.035	9706	1.354	0.739	0.922	1.59431
978	NCS1_KAN703-3_3.tif:0005-0733	1.765	162.759	0	1159	103.719	83.231	0.932	287.248	22298	1.137	0.879	0.958	3.66267
979	NCS1_KAN703-3_3.tif:0006-0751	1.649	16.031	0	95	30.183	85.298	0.881	26.434	2052	1.142	0.876	0.962	0.337062
980	NCS1_KAN703-3_3.tif:0007-0788	1.945	63.702	0	579	124.31	89.483	0.891	123.914	9619	1.195	0.837	0.956	1.58002
981	NCS1_KAN703-3_3.tif:0008-0805	1.816	85.617	0	535	10.23	91.394	0.934	155.515	12072	1.266	0.79	0.969	1.98295
982	NCS1_KAN703-3_3.tif:0009-0880	1.842	205.483	0	1276	58.486	99.938	0.922	378.532	29384	1.087	0.92	0.963	4.82662
983	NCS1_KAN703-3_3.tif:0010-0902	1.456	18.159	0	86	67.735	102.348	0.935	26.434	2052	1.248	0.801	0.95	0.337062
984	NCS1_KAN703-3_3.tif:0011-0933	1.585	15.431	0	149	18.393	105.924	0.976	24.451	1898	1.149	0.87	0.946	0.311766
985	NCS1_KAN703-3_3.tif:0012-0965	1.778	201.457	0	1441	100.461	109.569	0.939	358.139	27801	1.134	0.882	0.958	4.56659
986	NCS1_KAN703-3_4.tif:0001-0040	1.597	92.556	0	318	67.827	4.591	0.955	147.85	11477	1.216	0.822	0.947	1.88521
987	NCS1_KAN703-3_4.tif:0002-0193	2.319	116.867	0	551	124.221	21.903	0.891	270.991	21036	1.507	0.664	0.952	3.45537
988	NCS1_KAN703-3_4.tif:0003-0201	2.267	16.994	0	73	66.019	22.882	0.904	38.531	2991	1.295	0.772	0.931	0.491302
989	NCS1_KAN703-3_4.tif:0004-0219	1.636	108.661	0	400	97.611	24.85	0.924	177.775	13800	1.074	0.931	0.951	2.26679
990	NCS1_KAN703-3_4.tif:0005-0238	1.752	91.154	0	306	34.328	27.006	0.978	159.701	12397	1.249	0.8	0.958	2.03633
991	NCS1_KAN703-3_4.tif:0006-0344	2.203	116.673	0	617	116.232	39.086	0.918	257.014	19951	1.177	0.85	0.958	3.27715
992	NCS1_KAN703-3_4.tif:0007-0470	1.61	116.44	0	454	7.438	53.367	0.91	187.501	14555	1.179	0.848	0.943	2.39081
993	NCS1_KAN703-3_4.tif:0008-0506	2.048	97.591	0	464	91.8	57.431	0.929	199.894	15517	1.239	0.807	0.961	2.54882
994	NCS1_KAN703-3_4.tif:0009-0659	1.855	187.326	0	983	74.633	74.813	0.929	347.499	26975	1.099	0.91	0.966	4.43092
995	NCS1_KAN703-3_4.tif:0010-0675	1.881	44.301	0	522	38.618	76.597	0.921	83.322	6468	1.126	0.888	0.921	1.06243
996	NCS1_KAN703-3_4.tif:0011-0805	1.507	82.906	0	358	49.401	91.421	0.861	124.958	9700	1.18	0.848	0.955	1.59332
997	NCS1_KAN703-3_4.tif:0012-0886	1.391	20.222	0	70	98.23	100.622	0.962	28.135	2184	1.18	0.848	0.96	0.358744
998	NCS1_KAN703-3_4.tif:0013-1006	1.894	105.85	0	600	113.236	114.247	0.938	200.448	15560	1.352	0.739	0.958	2.55589
999	NCS1_KAN703-3_5.tif:0001-0032	1.481	108.557	0	454	11.754	3.699	0.935	160.822	12484	1.036	0.966	0.975	2.05062
1000	NCS1_KAN703-3_5.tif:0002-0064	1.288	180.98	0	1080	89.714	7.281	0.962	233.143	18098	1.209	0.827	0.971	2.97278
1001	NCS1_KAN703-3_5.tif:0003-0085	1.791	48.05	0	372	56.327	9.611	0.946	86.041	6679	1.115	0.897	0.962	1.09709
1002	NCS1_KAN703-3_5.tif:0004-0158	2.19	169.124	0	1618	135.921	18.074	0.842	370.378	28751	1.253	0.798	0.921	4.72264
1003	NCS1_KAN703-3_5.tif:0005-0313	2.267	79.562	0	797	85.48	35.534	0.901	180.39	14003	1.227	0.815	0.967	2.30013
1004	NCS1_KAN703-3_5.tif:0006-0449	2.383	134.341	0	955	109.88	50.939	0.858	320.163	24853	1.362	0.734	0.923	4.08236
1005	NCS1_KAN703-3_5.tif:0007-0480	2.254	69.857	0	635	48.901	54.538	0.89	157.486	12225	1.431	0.699	0.904	2.00808
1006	NCS1_KAN703-3_5.tif:0008-0534	1.314	39.039	0	193	10.264	60.619	0.95	51.297	3982	1.101	0.908	0.962	0.654084
1007	NCS1_KAN703-3_5.tif:0009-0588	2.332	75.232	0	740	138.635	66.794	0.887	175.418	13617	1.278	0.783	0.935	2.23673
1008	NCS1_KAN703-3_5.tif:0010-0676	2.448	88.311	0	849	24.874	76.784	0.807	216.151	16779	1.818	0.55	0.941	2.75612
1009	NCS1_KAN703-3_5.tif:0011-0695	1.804	57.457	0	254	67.139	78.938	0.77	103.625	8044	1.792	0.558	0.87	1.32131
1010	NCS1_KAN703-3_5.tif:0012-0748	1.958	249.336	0	1961	94.046	84.917	0.934	488.224	37899	1.16	0.862	0.941	6.22529
1011	NCS1_KAN703-3_5.tif:0013-0785	1.353	24.79	0	96	83.001	89.118	0.935	33.533	2603	1.241	0.806	0.95	0.427569
1012	NCS1_KAN703-3_5.tif:0014-0815	1.713	58.398	0	195	123.136	92.499	0.891	100.056	7767	1.411	0.709	0.974	1.27581
1013	NCS1_KAN703-3_5.tif:0015-0941	1.739	136.83	0	892	108.772	106.79	0.75	237.961	18472	1.833	0.546	0.871	3.03421
1014	NCS1_KAN703-3_5.tif:0016-0983	1.919	14.658	0	91	84.116	111.619	0.992	28.135	2184	1.095	0.914	0.943	0.358744
1015	NCS1_KAN703-3_5.tif:0017-1012	1.752	115.221	0	573	110.045	114.92	0.664	201.865	15670	2.394	0.418	0.866	2.57396
1016	NCS1_KAN703-3_5.tif:0018-1041	2.126	36.794	0	301	46.18	118.216	0.817	78.208	6071	1.721	0.581	0.932	0.997223
1017	NCS1_KAN703-3_5.tif:0019-1041	1.353	13.019	0	67	13.024	118.229	0.907	17.61	1367	1.137	0.879	0.938	0.224544
1018	NCS1_KAN703-3_5.tif:0020-1096	2.048	80.61	0	815	99.98	124.432	0.825	165.112	12817	1.753	0.57	0.916	2.10532
1019	NCS1_KAN703-3_5.tif:0021-1156	1.585	153.764	0	793	92.053	131.251	0.959	243.642	18913	1.095	0.913	0.972	3.10665
1020	NCS1_KAN703-3_6.tif:0001-0047	2.821	55.374	0	405	13.251	5.374	0.851	156.223	12127	1.395	0.717	0.914	1.99198
1021	NCS1_KAN703-3_6.tif:0002-0058	1.52	30.119	0	200	31.595	6.609	0.976	45.784	3554	1.162	0.86	0.959	0.58378
1022	NCS1_KAN703-3_6.tif:0003-0059	1.649	21.586	0	83	129.853	6.673	0.958	35.594	2763	1.132	0.883	0.955	0.453851
1023	NCS1_KAN703-3_6.tif:0004-0160	2.435	99.889	0	636	59.13	18.127	0.846	243.204	18879	1.638	0.61	0.95	3.10107
1024	NCS1_KAN703-3_6.tif:0005-0180	1.636	48.567	0	154	26.833	20.426	0.888	79.458	6168	1.374	0.728	0.93	1.01316
1025	NCS1_KAN703-3_6.tif:0006-0199	1.494	39.043	0	133	39.674	22.647	0.948	58.344	4529	1.246	0.803	0.924	0.743934
1026	NCS1_KAN703-3_6.tif:0007-0304	2.821	40.1	0	321	86.226	34.396	0.834	113.132	8782	1.399	0.715	0.907	1.44253
1027	NCS1_KAN703-3_6.tif:0008-0409	2.177	103.213	0	477	124.356	46.484	0.953	224.705	17443	1.168	0.856	0.952	2.86519
1028	NCS1_KAN703-3_6.tif:0009-0519	1.288	9.42	0	45	5.709	58.849	0.827	12.135	942	1.653	0.605	0.909	0.154733
1029	NCS1_KAN703-3_6.tif:0010-0673	2.422	153.154	0	1310	56.969	76.424	0.813	370.919	28793	1.689	0.592	0.974	4.72954
1030	NCS1_KAN703-3_6.tif:0011-0677	3.221	221.348	0	1293	106.451	76.829	0.889	712.865	55337	1.371	0.729	0.949	9.08966
1031	NCS1_KAN703-3_6.tif:0012-0715	1.636	11.677	0	63	20.363	81.207	0.951	19.104	1483	1.236	0.809	0.962	0.243598
1032	NCS1_KAN703-3_6.tif:0013-0845	1.842	25.643	0	197	36.609	95.948	0.962	47.239	3667	1.023	0.977	0.947	0.602342
1033	NCS1_KAN703-3_6.tif:0014-0956	1.778	134.703	0	942	144.32	108.559	0.9	239.468	18589	1.196	0.836	0.982	3.05343
1034	NCS1_KAN703-3_6.tif:0015-0982	2.473	109.25	0	1037	125.668	111.392	0.852	270.218	20976	1.367	0.732	0.914	3.44552
1035	NCS1_KAN703-3_6.tif:0016-0990	2.486	100.57	0	847	59.741	112.393	0.857	250.045	19410	1.502	0.666	0.932	3.18829
1036	NCS1_KAN703-3_6.tif:0017-1056	2.048	82.396	0	604	1.137	119.853	0.883	168.77	13101	1.312	0.762	0.946	2.15197
1037	NCS1_KAN703-3_6.tif:0018-1063	1.481	41.278	0	404	32.508	120.659	0.924	61.152	4747	1.233	0.811	0.943	0.779743
1038	NCS1_KAN703-3_6.tif:0019-1107	2.757	112.154	0	973	134.699	125.757	0.812	309.187	24001	1.252	0.799	0.926	3.94241
										14972.3				2.45935
1039	NCS1_KAN703-4_1.tif:0001-0013	2.151	144.389	0	1441	15.856	1.525	0.896	310.63	24113	1.622	0.617	0.963	3.9608
1040	NCS1_KAN703-4_1.tif:0002-0073	1.391	11.519	0	51	19.465	8.353	0.735	16.026	1244	2.212	0.452	0.893	0.20434
1041	NCS1_KAN703-4_1.tif:0003-0310	1.752	71.676	0	407	76.904	35.175	0.951	125.576	9748	1.328	0.753	0.961	1.60121
1042	NCS1_KAN703-4_1.tif:0004-0353	2.422	36.633	0	234	34.378	40.103	0.864	88.72	6887	1.671	0.598	0.938	1.13126
1043	NCS1_KAN703-4_1.tif:0005-0402	2.229	135.399	0	1309	59.375	45.632	0.865	301.754	23424	1.437	0.696	0.958	3.84763
1044	NCS1_KAN703-4_1.tif:0006-0720	2.254	128.126	0	1360	76.556	81.694	0.887	288.846	22422	1.286	0.778	0.933	3.68304
1045	NCS1_KAN703-4_1.tif:0007-0735	2.525	96.158	0	972	114.118	83.447	0.93	242.792	18847	1.358	0.736	0.947	3.09581
1046	NCS1_KAN703-4_1.tif:0008-0785	1.881	115.836	0	860	28.366	89.16	0.931	217.865	16912	1.189	0.841	0.948	2.77797
1047	NCS1_KAN703-4_1.tif:0009-0931	1.919	116.658	0	941	42.983	105.717	0.902	223.919	17382	1.401	0.714	0.958	2.85517
1048	NCS1_KAN703-4_1.tif:0010-0963	2.28	100.751	0	965	133.18	109.344	0.918	229.729	17833	1.11	0.901	0.939	2.92925
1049	NCS1_KAN703-4_1.tif:0011-1138	1.804	75.114	0	286	125.363	129.208	0.942	135.47	10516	1.116	0.896	0.943	1.72736
1050	NCS1_KAN703-4_1.tif:0012-1169	2.1	72.687	0	550	75.451	132.761	0.897	152.629	11848	1.345	0.744	0.937	1.94615
1051	NCS1_KAN703-4_1.tif:0013-1256	1.301	22.386	0	132	58.192	142.586	0.941	29.127	2261	1.107	0.904	0.971	0.371392
1052	NCS1_KAN703-4_2.tif:0001-0076	2.229	119.769	0	1183	104.101	8.659	0.965	266.92	20720	1.145	0.874	0.945	3.40347
1053	NCS1_KAN703-4_2.tif:0002-0085	2.074	140.292	0	767	71.746	9.716	0.917	290.971	22587	1.171	0.854	0.955	3.71014
1054	NCS1_KAN703-4_2.tif:0003-0090	1.919	13.557	0	111	96.654	10.151	0.8	26.022	2020	1.486	0.673	0.898	0.331805
1055	NCS1_KAN703-4_2.tif:0004-0209	1.327	87.903	0	268	89.394	23.75	0.717	116.636	9054	2.427	0.412	0.963	1.48721
1056	NCS1_KAN703-4_2.tif:0005-0238	2.692	106.995	0	1526	108.528	26.972	0.94	288.073	22362	1.109	0.901	0.944	3.67318
1057	NCS1_KAN703-4_2.tif:0006-0272	1.61	75.576	0	237	59.156	30.902	0.963	121.699	9447	1.009	0.991	0.947	1.55176
1058	NCS1_KAN703-4_2.tif:0007-0437	1.919	38.859	0	171	102.343	49.631	0.926	74.588	5790	1.184	0.844	0.958	0.951066
1059	NCS1_KAN703-4_2.tif:0008-0450	1.945	130.649	0	1036	52.369	51.126	0.938	254.141	19728	1.108	0.903	0.953	3.24052
1060	NCS1_KAN703-4_2.tif:0009-0504	2.293	143.713	0	1643	130.589	57.342	0.689	329.541	25581	1.733	0.577	0.858	4.20194
1061	NCS1_KAN703-4_2.tif:0010-0532	1.623	144.087	0	1112	6.98	60.382	0.955	233.877	18155	1.089	0.918	0.977	2.98214
1062	NCS1_KAN703-4_2.tif:0011-0587	1.288	7.08	0	39	120.528	66.604	0.692	9.121	708	2.412	0.415	0.837	0.116296
1063	NCS1_KAN703-4_2.tif:0012-0637	1.778	45.261	0	191	88.634	72.296	0.929	80.463	6246	1.411	0.709	0.942	1.02597
1064	NCS1_KAN703-4_2.tif:0013-0705	2.332	104.564	0	1079	122.318	80.026	0.856	243.81	18926	1.141	0.876	0.955	3.10879
1065	NCS1_KAN703-4_2.tif:0014-0727	2.074	156.472	0	1120	72.348	82.518	0.94	324.53	25192	1.102	0.907	0.955	4.13804
1066	NCS1_KAN703-4_2.tif:0015-0832	2.254	9.394	0	96	31.87	94.508	0.746	21.178	1644	1.985	0.504	0.891	0.270044
1067	NCS1_KAN703-4_2.tif:0016-0890	1.597	84.911	0	366	67.997	101.067	0.913	135.637	10529	1.123	0.89	0.973	1.72949
1068	NCS1_KAN703-4_2.tif:0017-0965	3.285	18.812	0	116	95.443	109.627	0.832	61.796	4797	1.586	0.631	0.927	0.787956
1069	NCS1_KAN703-4_2.tif:0018-0984	1.752	81.022	0	491	6.77	111.662	0.854	141.95	11019	1.77	0.565	0.982	1.80998
1070	NCS1_KAN703-4_2.tif:0019-0987	2.151	91.623	0	904	141.926	112.013	0.941	197.111	15301	1.329	0.752	0.965	2.51334
1071	NCS1_KAN703-4_2.tif:0020-1118	2.229	144.613	0	1430	113.677	126.936	0.898	322.288	25018	1.073	0.932	0.93	4.10946
1072	NCS1_KAN703-4_2.tif:0021-1166	2.705	26.514	0	125	38.665	132.37	0.965	71.728	5568	1.21	0.827	0.952	0.9146
1073	NCS1_KAN703-4_2.tif:0022-1220	1.61	32.736	0	255	91.137	138.547	0.91	52.714	4092	1.23	0.813	0.951	0.672152
1074	NCS1_KAN703-4_3.tif:0001-0176	2.061	147.894	0	944	64.261	20.023	0.925	304.833	23663	1.268	0.788	0.95	3.88689
1075	NCS1_KAN703-4_3.tif:0002-0182	2.074	40.472	0	194	113.025	20.685	0.908	83.941	6516	1.445	0.692	0.944	1.07032
1076	NCS1_KAN703-4_3.tif:0003-0221	1.919	168.248	0	1147	10.886	25.094	0.95	322.945	25069	1.273	0.786	0.968	4.11784
1077	NCS1_KAN703-4_3.tif:0004-0306	1.597	20.016	0	85	19.077	34.798	0.955	31.974	2482	1.176	0.85	0.95	0.407693
1078	NCS1_KAN703-4_3.tif:0005-0330	2.138	154.729	0	1465	33.835	37.453	0.87	330.881	25685	1.402	0.713	0.938	4.21902
1079	NCS1_KAN703-4_3.tif:0006-0357	1.894	52.313	0	178	58.521	40.506	0.928	99.065	7690	1.341	0.746	0.933	1.26316
1080	NCS1_KAN703-4_3.tif:0007-0496	2.28	213.237	0	2215	104.613	56.289	0.918	486.215	37743	1.086	0.921	0.934	6.19967
1081	NCS1_KAN703-4_3.tif:0008-0574	1.43	91.946	0	817	15.33	65.129	0.93	131.476	10206	1.202	0.832	0.965	1.67644
1082	NCS1_KAN703-4_3.tif:0009-0679	1.919	152.383	0	1650	73.612	77.161	0.902	292.492	22705	1.114	0.898	0.955	3.72952
1083	NCS1_KAN703-4_3.tif:0010-0693	1.945	120.305	0	1076	113.614	78.655	0.938	234.019	18166	1.168	0.856	0.959	2.98395
1084	NCS1_KAN703-4_3.tif:0011-0796	1.481	98.043	0	544	23.513	90.436	0.952	145.247	11275	1.167	0.857	0.95	1.85203
1085	NCS1_KAN703-4_3.tif:0012-0896	1.61	116.48	0	1006	91.191	101.672	0.92	187.566	14560	1.078	0.928	0.977	2.39163
1086	NCS1_KAN703-4_3.tif:0013-1169	1.829	134.437	0	638	118.621	132.717	0.941	245.922	19090	1.097	0.911	0.966	3.13572
1087	NCS1_KAN703-4_4.tif:0001-0046	2.448	18.058	0	86	4.996	5.199	0.932	44.199	3431	1.191	0.84	0.945	0.563576
1088	NCS1_KAN703-4_4.tif:0002-0066	1.688	129.412	0	572	81.88	7.549	0.902	218.393	16953	1.208	0.828	0.96	2.7847
1089	NCS1_KAN703-4_4.tif:0003-0180	2.203	28.281	0	129	30.537	20.519	0.858	62.299	4836	1.213	0.825	0.912	0.794362
1090	NCS1_KAN703-4_4.tif:0004-0192	2.332	115.497	0	1187	143.474	21.791	0.887	269.303	20905	1.237	0.808	0.923	3.43386
1091	NCS1_KAN703-4_4.tif:0005-0244	2.628	125.127	0	704	118.404	27.657	0.917	328.832	25526	1.388	0.72	0.942	4.1929
1092	NCS1_KAN703-4_4.tif:0006-0342	2.267	165.455	0	1684	99.127	38.874	0.892	375.131	29120	1.398	0.715	0.954	4.78325
1093	NCS1_KAN703-4_4.tif:0007-0343	2.254	108.349	0	735	66.269	38.992	0.93	244.26	18961	1.312	0.762	0.943	3.11453
1094	NCS1_KAN703-4_4.tif:0008-0493	1.7	124.235	0	671	48.198	56.017	0.934	211.256	16399	1.181	0.847	0.967	2.6937
1095	NCS1_KAN703-4_4.tif:0009-0506	1.417	5.536	0	27	31.437	57.432	0.91	7.845	609	1.139	0.878	0.928	0.100034
1096	NCS1_KAN703-4_4.tif:0010-0594	1.945	90.126	0	891	100.574	67.458	0.882	175.315	13609	1.442	0.694	0.956	2.23542
1097	NCS1_KAN703-4_4.tif:0011-0646	3.053	15.139	0	180	55.591	73.369	0.932	46.222	3588	1.219	0.82	0.946	0.589365
1098	NCS1_KAN703-4_4.tif:0012-0703	2.087	67.92	0	800	136.864	79.837	0.87	141.743	11003	1.241	0.806	0.942	1.80735
1099	NCS1_KAN703-4_4.tif:0013-0706	1.791	90.561	0	839	86.358	80.177	0.921	162.162	12588	1.222	0.819	0.962	2.06771
1100	NCS1_KAN703-4_4.tif:0014-0729	1.739	20.23	0	105	69.644	82.772	0.919	35.181	2731	1.065	0.939	0.947	0.448594
1101	NCS1_KAN703-4_4.tif:0015-0858	1.662	25.837	0	94	138.667	97.412	0.939	42.937	3333	1.123	0.89	0.956	0.547479
1102	NCS1_KAN703-4_4.tif:0016-0876	2.551	31.636	0	187	122.69	99.434	0.94	80.694	6264	1.162	0.861	0.941	1.02893
1103	NCS1_KAN703-4_4.tif:0017-0900	1.675	24.162	0	106	32.583	102.184	0.946	40.463	3141	1.073	0.932	0.967	0.515941
1104	NCS1_KAN703-4_4.tif:0018-0911	1.804	132.95	0	742	76.004	103.401	0.927	239.777	18613	1.33	0.752	0.966	3.05737
1105	NCS1_KAN703-4_4.tif:0019-1017	1.829	105.338	0	553	52.882	115.459	0.941	192.693	14958	1.126	0.888	0.969	2.457
1106	NCS1_KAN703-4_4.tif:0020-1187	1.572	77.205	0	552	62.701	134.718	0.951	121.338	9419	1.096	0.913	0.964	1.54717
1107	NCS1_KAN703-4_4.tif:0021-1200	1.752	40.176	0	441	3.474	136.263	0.915	70.389	5464	1.429	0.7	0.941	0.897517
1108	NCS1_KAN703-4_4.tif:0022-1220	2.138	133.217	0	1497	97.533	138.447	0.891	284.878	22114	1.326	0.754	0.951	3.63245
1109	NCS1_KAN703-4_5.tif:0001-0008	1.971	142.562	0	1824	104.754	0.888	0.842	280.988	21812	1.386	0.721	0.916	3.58284
1110	NCS1_KAN703-4_5.tif:0002-0031	2.963	18.4	0	129	92.803	3.612	0.912	54.518	4232	1.152	0.868	0.939	0.695149
1111	NCS1_KAN703-4_5.tif:0003-0045	2.074	92.435	0	766	127.259	5.139	0.917	191.714	14882	1.112	0.9	0.958	2.44452
1112	NCS1_KAN703-4_5.tif:0004-0107	2.023	52.057	0	444	4.657	12.17	0.917	105.287	8173	1.23	0.813	0.952	1.3425
1113	NCS1_KAN703-4_5.tif:0005-0149	2.319	139.933	0	1588	94.185	16.925	0.871	324.478	25188	1.348	0.742	0.947	4.13738
1114	NCS1_KAN703-4_5.tif:0006-0183	2.203	150.83	0	1447	5.298	20.797	0.875	332.259	25792	1.445	0.692	0.955	4.2366
1115	NCS1_KAN703-4_5.tif:0007-0184	3.233	24.482	0	172	43.322	20.811	0.804	79.161	6145	1.296	0.772	0.911	1.00938
1116	NCS1_KAN703-4_5.tif:0008-0244	2.1	44.552	0	294	77.905	27.674	0.897	93.551	7262	1.464	0.683	0.953	1.19286
1117	NCS1_KAN703-4_5.tif:0009-0352	1.675	112.115	0	892	71.331	39.99	0.946	187.759	14575	1.184	0.845	0.963	2.39409
1118	NCS1_KAN703-4_5.tif:0010-0430	2.113	68.128	0	369	35.409	48.829	0.872	143.933	11173	1.346	0.743	0.901	1.83528
1119	NCS1_KAN703-4_5.tif:0011-0446	2.074	125.429	0	1276	7.379	50.653	0.94	260.144	20194	1.113	0.898	0.95	3.31707
1120	NCS1_KAN703-4_5.tif:0012-0470	1.572	144.402	0	1310	24.362	53.314	0.863	226.947	17617	1.409	0.71	0.942	2.89377
1121	NCS1_KAN703-4_5.tif:0013-0468	1.623	12.127	0	120	89.977	53.129	0.683	19.684	1528	2.608	0.384	0.91	0.250989
1122	NCS1_KAN703-4_5.tif:0014-0528	2.28	23.192	0	96	104.459	60.076	0.876	52.882	4105	1.28	0.781	0.959	0.674288
1123	NCS1_KAN703-4_5.tif:0015-0623	1.958	10.934	0	60	60.369	70.755	0.888	21.41	1662	1.317	0.759	0.938	0.273
1124	NCS1_KAN703-4_5.tif:0016-0634	1.881	103.021	0	483	23.501	71.964	0.931	193.762	15041	1.185	0.844	0.948	2.47064
1125	NCS1_KAN703-4_5.tif:0017-0711	1.494	7.733	0	39	19.998	80.783	0.802	11.555	897	1.92	0.521	0.913	0.147341
1126	NCS1_KAN703-4_5.tif:0018-0764	1.623	43.278	0	393	88.963	86.794	0.971	70.247	5453	1.188	0.842	0.962	0.89571
1127	NCS1_KAN703-4_5.tif:0019-0822	1.868	41.876	0	334	96.987	93.29	0.911	78.221	6072	1.283	0.779	0.973	0.997387
1128	NCS1_KAN703-4_5.tif:0020-0850	2.396	15.704	0	88	129.773	96.447	0.844	37.629	2921	1.329	0.752	0.91	0.479804
1129	NCS1_KAN703-4_5.tif:0021-0886	2.306	78.989	0	389	73.539	100.636	0.886	182.142	14139	1.341	0.746	0.942	2.32247
1130	NCS1_KAN703-4_5.tif:0022-0974	1.34	44.692	0	168	44.799	110.577	0.956	59.877	4648	1.028	0.973	0.945	0.763481
1131	NCS1_KAN703-4_5.tif:0023-1008	1.585	32.089	0	121	113.507	114.388	0.895	50.846	3947	1.179	0.848	0.935	0.648334
1132	NCS1_KAN703-4_5.tif:0024-1089	2.164	141.173	0	1275	86.817	123.659	0.88	305.528	23717	1.256	0.796	0.946	3.89576
1133	NCS1_KAN703-4_5.tif:0025-1216	2.087	112.117	0	888	40.433	138.02	0.913	233.98	18163	1.27	0.788	0.939	2.98346
1134	NCS1_KAN703-4_6.tif:0001-0013	2.242	167.724	0	1472	92.173	1.462	0.89	375.956	29184	1.396	0.716	0.959	4.79377
1135	NCS1_KAN703-4_6.tif:0002-0089	2.473	127.099	0	1586	92.968	10.197	0.879	314.366	24403	1.043	0.959	0.937	4.00844
1136	NCS1_KAN703-4_6.tif:0003-0116	1.597	71.815	0	557	64.7	13.18	0.902	114.716	8905	1.242	0.805	0.943	1.46274
1137	NCS1_KAN703-4_6.tif:0004-0133	1.533	13.294	0	69	106.357	15.067	0.944	20.38	1582	1.207	0.828	0.941	0.259859
1138	NCS1_KAN703-4_6.tif:0005-0269	1.855	163.785	0	1216	60.928	30.621	0.943	303.828	23585	1.196	0.836	0.947	3.87407
1139	NCS1_KAN703-4_6.tif:0006-0274	2.126	65.115	0	344	32.576	31.097	0.886	138.407	10744	1.387	0.721	0.943	1.76481
1140	NCS1_KAN703-4_6.tif:0007-0292	2.254	122.823	0	1240	105.024	33.102	0.846	276.891	21494	1.441	0.694	0.941	3.53061
1141	NCS1_KAN703-4_6.tif:0008-0353	2.576	165.44	0	2116	110.021	40.052	0.85	426.248	33088	1.58	0.633	0.946	5.43504
1142	NCS1_KAN703-4_6.tif:0009-0460	1.829	33.718	0	116	92.578	52.284	0.93	61.68	4788	1.208	0.828	0.944	0.786477
1143	NCS1_KAN703-4_6.tif:0010-0602	2.177	105.627	0	929	26.651	68.309	0.877	229.961	17851	1.332	0.751	0.934	2.93221
1144	NCS1_KAN703-4_6.tif:0011-0609	2.332	149.906	0	1662	119.457	69.14	0.9	349.534	27133	1.255	0.797	0.919	4.45687
1145	NCS1_KAN703-4_6.tif:0012-0658	2.783	135.102	0	1664	83.307	74.787	0.857	375.93	29182	1.639	0.61	0.939	4.79344
1146	NCS1_KAN703-4_6.tif:0013-0712	2.229	60.312	0	470	47.279	80.778	0.877	134.413	10434	1.332	0.751	0.928	1.71389
1147	NCS1_KAN703-4_6.tif:0014-0896	2.151	71.605	0	327	107.716	101.665	0.919	154.046	11958	1.074	0.931	0.944	1.96422
1148	NCS1_KAN703-4_6.tif:0015-0958	2.074	133.578	0	1039	45.165	108.824	0.94	277.046	21506	1.137	0.879	0.955	3.53258
1149	NCS1_KAN703-4_6.tif:0016-1064	2.164	130.452	0	1490	119.805	120.849	0.88	282.327	21916	1.616	0.619	0.955	3.59992
1150	NCS1_KAN703-4_6.tif:0017-1233	1.662	27.589	0	96	17.125	139.983	0.966	45.848	3559	1.057	0.946	0.97	0.584602
										13507.6				2.21877
1151	NCS1_KAN703-5_1.tif:0001-0071	1.7	10.75	0	57	38.998	8.085	0.934	18.28	1419	1.188	0.842	0.967	0.233085
1152	NCS1_KAN703-5_1.tif:0002-0079	1.713	15.474	0	86	52.571	8.96	0.984	26.512	2058	1.127	0.887	0.95	0.338047
1153	NCS1_KAN703-5_1.tif:0003-0127	2.409	123.791	0	517	97.375	14.403	0.917	298.211	23149	1.431	0.699	0.959	3.80246
1154	NCS1_KAN703-5_1.tif:0004-0217	1.7	21.235	0	136	132.464	24.679	0.874	36.109	2803	1.575	0.635	0.943	0.460421
1155	NCS1_KAN703-5_1.tif:0005-0296	1.507	21.684	0	121	53.107	33.6	0.842	32.682	2537	1.139	0.878	0.893	0.416728
1156	NCS1_KAN703-5_1.tif:0006-0517	1.662	19.899	0	124	59.697	58.717	0.892	33.069	2567	1.517	0.659	0.921	0.421656
1157	NCS1_KAN703-5_1.tif:0007-0564	2.151	127.617	0	641	136.264	64.062	0.941	274.547	21312	1.255	0.797	0.944	3.50071
1158	NCS1_KAN703-5_1.tif:0008-0736	1.894	130.782	0	711	74.636	83.598	0.938	247.661	19225	1.167	0.857	0.955	3.1579
1159	NCS1_KAN703-5_1.tif:0009-0846	2.319	122.183	0	747	47.879	96.111	0.871	283.319	21993	1.686	0.593	0.965	3.61257
1160	NCS1_KAN703-5_1.tif:0010-0983	2.409	43.717	0	412	101.23	111.676	0.848	105.312	8175	1.217	0.822	0.901	1.34283
1161	NCS1_KAN703-5_1.tif:0011-1181	3.246	125.651	0	660	71.406	134.054	0.801	407.904	31664	1.75	0.571	0.911	5.20113
1162	NCS1_KAN703-5_2.tif:0001-0125	1.868	93.407	0	433	31.237	14.178	0.878	174.477	13544	1.236	0.809	0.942	2.22474
1163	NCS1_KAN703-5_2.tif:0002-0144	2.705	131.076	0	889	104.812	16.263	0.858	354.597	27526	1.334	0.75	0.919	4.52142
1164	NCS1_KAN703-5_2.tif:0003-0153	1.791	44.683	0	150	136.621	17.362	0.887	80.012	6211	1.374	0.728	0.939	1.02022
1165	NCS1_KAN703-5_2.tif:0004-0159	1.713	112.023	0	643	114.49	18.134	0.941	191.933	14899	1.201	0.833	0.974	2.44731
1166	NCS1_KAN703-5_2.tif:0005-0223	2.989	79.185	0	1351	75.178	25.37	0.757	236.66	18371	1.762	0.568	0.877	3.01762
1167	NCS1_KAN703-5_2.tif:0006-0244	2.01	28.474	0	164	40.603	27.685	0.829	57.223	4442	1.735	0.576	0.912	0.729643
1168	NCS1_KAN703-5_2.tif:0007-0296	2.035	90.93	0	429	58.726	33.601	0.923	185.079	14367	1.285	0.778	0.946	2.35992
1169	NCS1_KAN703-5_2.tif:0008-0383	2.95	98.048	0	872	104.516	43.559	0.792	289.245	22453	1.795	0.557	0.907	3.68813
1170	NCS1_KAN703-5_2.tif:0009-0431	2.422	103.856	0	795	129.334	48.975	0.834	251.526	19525	1.612	0.62	0.935	3.20718
1171	NCS1_KAN703-5_2.tif:0010-0602	1.443	57.036	0	133	128.951	68.362	0.927	82.292	6388	1.264	0.791	0.945	1.04929
1172	NCS1_KAN703-5_2.tif:0011-0652	2.087	21.494	0	92	34.202	74.059	0.913	44.856	3482	1.218	0.821	0.934	0.571954
1173	NCS1_KAN703-5_2.tif:0012-0668	2.718	145.493	0	1659	89.258	75.854	0.817	395.472	30699	1.624	0.616	0.93	5.04262
1174	NCS1_KAN703-5_2.tif:0013-0670	3.027	59.834	0	763	73.068	76.023	0.797	181.137	14061	1.895	0.528	0.918	2.30966
1175	NCS1_KAN703-5_2.tif:0014-0880	1.713	40.744	0	136	76.707	99.98	0.957	69.809	5419	1.171	0.854	0.947	0.890125
1176	NCS1_KAN703-5_2.tif:0015-0925	1.52	80.144	0	470	36.924	105.035	0.894	121.827	9457	1.359	0.736	0.959	1.55341
1177	NCS1_KAN703-5_2.tif:0016-1076	1.739	50.785	0	292	94.064	122.17	0.904	88.321	6856	1.157	0.865	0.975	1.12617
1178	NCS1_KAN703-5_3.tif:0001-0192	1.391	44.009	0	149	34.952	21.801	0.962	61.229	4753	1.254	0.797	0.956	0.780728
1179	NCS1_KAN703-5_3.tif:0002-0281	2.422	53.559	0	440	98.109	31.849	0.775	129.711	10069	1.532	0.653	0.87	1.65393
1180	NCS1_KAN703-5_3.tif:0003-0451	2.357	116.383	0	921	98.782	51.143	0.82	274.366	21298	1.605	0.623	0.941	3.49841
1181	NCS1_KAN703-5_3.tif:0004-0547	1.597	49.016	0	239	36.658	62.089	0.877	78.298	6078	1.516	0.66	0.95	0.998373
1182	NCS1_KAN703-5_3.tif:0005-0633	2.28	29.384	0	131	12.006	71.893	0.941	67.001	5201	1.088	0.919	0.939	0.854317
1183	NCS1_KAN703-5_3.tif:0006-0677	2.499	173.974	0	1375	105.395	76.833	0.824	434.789	33751	1.577	0.634	0.935	5.54394
1184	NCS1_KAN703-5_3.tif:0007-0774	1.842	43.524	0	322	38.809	87.813	0.937	80.179	6224	1.187	0.842	0.938	1.02235
1185	NCS1_KAN703-5_3.tif:0008-0814	1.34	11.279	0	61	47.129	92.446	0.987	15.111	1173	1.13	0.885	0.945	0.192677
1186	NCS1_KAN703-5_3.tif:0009-0959	1.881	143.534	0	948	61.753	108.832	0.884	269.96	20956	1.327	0.754	0.945	3.44223
1187	NCS1_KAN703-5_3.tif:0010-1052	2.293	120.669	0	866	95.412	119.476	0.881	276.698	21479	1.332	0.751	0.937	3.52814
1188	NCS1_KAN703-5_3.tif:0011-1052	2.177	166.32	0	1179	115.952	119.418	0.907	362.094	28108	1.225	0.816	0.949	4.61702
1189	NCS1_KAN703-5_3.tif:0012-1107	2.203	12.825	0	134	14.985	125.691	0.776	28.251	2193	1.683	0.594	0.87	0.360222
1190	NCS1_KAN703-5_4.tif:0001-0010	2.164	139.476	0	540	120.477	1.113	0.851	301.857	23432	1.43	0.699	0.931	3.84894
1191	NCS1_KAN703-5_4.tif:0002-0072	1.919	102.436	0	457	61.646	8.191	0.95	196.622	15263	1.198	0.835	0.961	2.5071
1192	NCS1_KAN703-5_4.tif:0003-0246	2.164	116.929	0	552	20.493	28.045	0.893	253.059	19644	1.353	0.739	0.926	3.22672
1193	NCS1_KAN703-5_4.tif:0004-0313	2.035	55.247	0	263	89.421	35.519	0.913	112.449	8729	1.441	0.694	0.943	1.43383
1194	NCS1_KAN703-5_4.tif:0005-0401	1.932	106.867	0	535	126.925	45.542	0.899	206.502	16030	1.335	0.749	0.938	2.63309
1195	NCS1_KAN703-5_4.tif:0006-0470	1.868	63.876	0	344	103.862	53.347	0.95	119.315	9262	1.192	0.839	0.951	1.52138
1196	NCS1_KAN703-5_4.tif:0007-0532	2.229	152.289	0	1065	84.688	60.51	0.898	339.396	26346	1.15	0.869	0.928	4.3276
1197	NCS1_KAN703-5_4.tif:0008-0558	2.628	151.985	0	1418	38.266	63.399	0.886	399.414	31005	1.432	0.699	0.951	5.09288
1198	NCS1_KAN703-5_4.tif:0009-0562	1.919	108.832	0	592	32.448	63.934	0.808	208.899	16216	1.322	0.757	0.914	2.66364
1199	NCS1_KAN703-5_4.tif:0010-0705	2.151	135.425	0	788	119.368	80.061	0.919	291.345	22616	1.307	0.765	0.944	3.71491
1200	NCS1_KAN703-5_4.tif:0011-0808	1.945	74.669	0	363	55.567	91.732	0.953	145.247	11275	1.08	0.926	0.935	1.85203
1201	NCS1_KAN703-5_4.tif:0012-0924	2.1	45.724	0	288	121.918	104.888	0.942	96.011	7453	1.165	0.858	0.948	1.22423
1202	NCS1_KAN703-5_4.tif:0013-0954	1.932	32.307	0	134	107.388	108.328	0.846	62.427	4846	1.54	0.649	0.906	0.796004
1203	NCS1_KAN703-5_5.tif:0001-0134	1.713	38.579	0	285	63.499	15.185	0.93	66.099	5131	1.311	0.763	0.95	0.842818
1204	NCS1_KAN703-5_5.tif:0002-0241	2.499	200.562	0	1751	101.457	27.351	0.88	501.236	38909	1.334	0.749	0.937	6.39119
1205	NCS1_KAN703-5_5.tif:0003-0302	2.551	140.333	0	1148	6.945	34.318	0.879	357.946	27786	1.463	0.683	0.938	4.56413
1206	NCS1_KAN703-5_5.tif:0004-0469	2.126	198.43	0	1486	140.711	53.303	0.93	421.778	32741	1.247	0.802	0.948	5.37804
1207	NCS1_KAN703-5_5.tif:0005-0473	1.61	52.088	0	506	32.956	53.697	0.884	83.876	6511	1.455	0.687	0.954	1.0695
1208	NCS1_KAN703-5_5.tif:0006-0537	2.164	42.244	0	349	55.088	60.935	0.86	91.425	7097	1.138	0.878	0.944	1.16575
1209	NCS1_KAN703-5_5.tif:0007-0601	1.894	166.469	0	1146	23.902	68.252	0.938	315.242	24471	1.171	0.854	0.955	4.01961
1210	NCS1_KAN703-5_5.tif:0008-0656	1.7	13.962	0	63	8.108	74.467	0.898	23.742	1843	1.292	0.774	0.94	0.302731
1211	NCS1_KAN703-5_5.tif:0009-0734	2.126	184.17	0	1284	139.984	83.34	0.917	391.466	30388	1.298	0.77	0.965	4.99153
1212	NCS1_KAN703-5_5.tif:0010-0844	2.126	62.485	0	878	111.878	95.846	0.93	132.816	10310	1.24	0.806	0.943	1.69352
1213	NCS1_KAN703-5_5.tif:0011-0961	1.456	7.301	0	70	18.627	109.147	0.964	10.628	825	1.118	0.895	0.946	0.135515
1214	NCS1_KAN703-5_5.tif:0012-0975	2.087	71.92	0	619	45.171	110.684	0.87	150.091	11651	1.441	0.694	0.934	1.91379
1215	NCS1_KAN703-5_5.tif:0013-1068	2.461	27.393	0	155	73.068	121.305	0.736	67.4	5232	2.193	0.456	0.884	0.859409
1216	NCS1_KAN703-5_6.tif:0001-0081	1.958	143.993	0	1041	17.114	9.248	0.934	281.954	21887	1.27	0.787	0.944	3.59516
1217	NCS1_KAN703-5_6.tif:0002-0216	1.662	104.07	0	699	83.97	24.499	0.966	172.944	13425	1.026	0.975	0.956	2.20519
1218	NCS1_KAN703-5_6.tif:0003-0246	2.886	20.299	0	92	121.125	27.991	0.676	58.576	4547	2.287	0.437	0.855	0.74689
1219	NCS1_KAN703-5_6.tif:0004-0522	1.726	141.015	0	475	106.335	59.296	0.888	243.423	18896	1.25	0.8	0.947	3.10386
1220	NCS1_KAN703-5_6.tif:0005-0549	1.997	181.658	0	1173	13.733	62.3	0.939	362.726	28157	1.213	0.824	0.966	4.62507
1221	NCS1_KAN703-5_6.tif:0006-0563	1.533	42.059	0	141	37.127	63.949	0.928	64.476	5005	1.354	0.739	0.964	0.822122
1222	NCS1_KAN703-5_6.tif:0007-0636	2.396	167.763	0	1975	87.498	72.157	0.903	401.978	31204	1.528	0.655	0.937	5.12557
1223	NCS1_KAN703-5_6.tif:0008-0697	1.765	73.46	0	626	124.095	79.196	0.884	129.647	10064	1.199	0.834	0.945	1.65311
1224	NCS1_KAN703-5_6.tif:0009-0774	1.546	17.908	0	87	109.226	87.84	0.964	27.684	2149	1.112	0.9	0.964	0.352995
1225	NCS1_KAN703-5_6.tif:0010-0846	1.585	13.057	0	90	62.982	96.011	0.976	20.689	1606	1.078	0.928	0.943	0.263802
1226	NCS1_KAN703-5_6.tif:0011-0859	1.61	67.344	0	434	25.388	97.494	0.91	108.443	8418	1.235	0.81	0.954	1.38274
1227	NCS1_KAN703-5_6.tif:0012-0861	1.314	14.745	0	96	65.024	97.788	0.95	19.375	1504	1.33	0.752	0.976	0.247047
1228	NCS1_KAN703-5_6.tif:0013-0976	2.023	152.866	0	1175	94.325	110.823	0.917	309.174	24000	1.164	0.859	0.946	3.94224
1229	NCS1_KAN703-5_6.tif:0014-1053	1.713	17.015	0	80	58.601	119.505	0.905	29.153	2263	1.291	0.775	0.94	0.371721
1230	NCS1_KAN703-5_7.tif:0001-0116	2.151	78.168	0	835	108.558	13.25	0.827	168.165	13054	1.259	0.795	0.891	2.14425
1231	NCS1_KAN703-5_7.tif:0002-0308	2.074	104.702	0	704	27.198	35.001	0.908	217.156	16857	1.451	0.689	0.947	2.76893
1232	NCS1_KAN703-5_7.tif:0003-0312	2.151	193.521	0	1712	77.305	35.457	0.896	416.329	32318	1.016	0.984	0.941	5.30856
1233	NCS1_KAN703-5_7.tif:0004-0324	2.203	90.825	0	443	65.086	36.767	0.887	200.074	15531	1.432	0.699	0.937	2.55112
1234	NCS1_KAN703-5_7.tif:0005-0350	2.37	147.516	0	1611	130.555	39.808	0.862	349.663	27143	1.553	0.644	0.936	4.45851
1235	NCS1_KAN703-5_7.tif:0006-0538	1.713	99.887	0	979	51.591	61.086	0.905	171.141	13285	1.359	0.736	0.95	2.18219
1236	NCS1_KAN703-5_7.tif:0007-0559	2.216	16.32	0	114	113.185	63.466	0.884	36.16	2807	1.462	0.684	0.93	0.461078
1237	NCS1_KAN703-5_7.tif:0008-0579	2.074	94.292	0	729	58.733	65.765	0.886	195.565	15181	1.488	0.672	0.944	2.49363
1238	NCS1_KAN703-5_7.tif:0009-0715	2.061	144.85	0	1240	90.518	81.16	0.911	298.559	23176	1.322	0.756	0.952	3.80689
1239	NCS1_KAN703-5_7.tif:0010-0730	1.945	61.98	0	537	12.392	82.922	0.882	120.565	9359	1.136	0.88	0.924	1.53731
1240	NCS1_KAN703-5_7.tif:0011-0801	2.589	77.179	0	443	102.66	90.935	0.814	199.842	15513	1.904	0.525	0.912	2.54817
1241	NCS1_KAN703-5_7.tif:0012-0923	1.971	62.484	0	303	100.546	104.779	0.871	123.154	9560	1.262	0.792	0.936	1.57033
1242	NCS1_KAN703-5_7.tif:0013-0972	1.868	92.938	0	646	27.6	110.339	0.901	173.601	13476	1.227	0.815	0.935	2.21357
1243	NCS1_KAN703-5_7.tif:0014-1055	1.481	9.33	0	67	44.198	119.739	0.952	13.823	1073	1.063	0.94	0.943	0.176251
1244	NCS1_KAN703-5_7.tif:0015-1196	1.778	122.283	0	941	135.559	135.813	0.904	217.388	16875	1.068	0.936	0.917	2.77189
1245	NCS1_KAN703-5_7.tif:0016-1237	1.804	69.271	0	516	29.755	140.441	0.848	124.932	9698	1.401	0.714	0.93	1.59299
										14094				2.31508
1246	NCS1_KAN703-6_1.tif:0001-0023	2.705	166.505	0	2376	30.492	2.582	0.855	450.441	34966	1.616	0.619	0.968	5.74352
1247	NCS1_KAN703-6_1.tif:0002-0063	2.216	163.599	0	1740	85.356	7.156	0.88	362.494	28139	1.357	0.737	0.953	4.62211
1248	NCS1_KAN703-6_1.tif:0003-0158	2.731	88.561	0	551	120.145	17.954	0.831	241.864	18775	1.644	0.608	0.924	3.08398
1249	NCS1_KAN703-6_1.tif:0004-0178	2.332	112.718	0	618	82.135	20.25	0.952	262.824	20402	1.049	0.954	0.926	3.35123
1250	NCS1_KAN703-6_1.tif:0005-0284	2.486	62.513	0	368	14.147	32.155	0.83	155.424	12065	1.554	0.643	0.908	1.9818
1251	NCS1_KAN703-6_1.tif:0006-0340	2.808	135.739	0	1630	85.2	38.629	0.837	381.199	29591	1.378	0.725	0.908	4.86062
1252	NCS1_KAN703-6_1.tif:0007-0413	2.564	145.161	0	1807	113.484	46.864	0.864	372.13	28887	1.653	0.605	0.95	4.74498
1253	NCS1_KAN703-6_1.tif:0008-0483	2.396	102.425	0	879	49.799	54.871	0.871	245.42	19051	1.515	0.66	0.949	3.12932
1254	NCS1_KAN703-6_1.tif:0009-0603	2.744	114.23	0	564	127.822	68.463	0.917	313.438	24331	1.182	0.846	0.938	3.99661
1255	NCS1_KAN703-6_1.tif:0010-0608	2.203	173.427	0	1745	100.618	69.088	0.918	382.036	29656	1.236	0.809	0.95	4.8713
1256	NCS1_KAN703-6_1.tif:0011-0617	2.654	161.286	0	2291	56.67	69.99	0.849	428.013	33225	1.417	0.706	0.932	5.45754
1257	NCS1_KAN703-6_1.tif:0012-0674	2.641	137.761	0	1509	29.249	76.473	0.856	363.808	28241	1.393	0.718	0.913	4.63887
1258	NCS1_KAN703-6_1.tif:0013-0831	2.035	209.823	0	1698	113.399	94.335	0.933	427.072	33152	1.189	0.841	0.978	5.44555
1259	NCS1_KAN703-6_1.tif:0014-0847	2.692	184.11	0	2251	94.065	96.184	0.869	495.696	38479	1.48	0.676	0.954	6.32056
1260	NCS1_KAN703-6_1.tif:0015-1027	2.023	146.236	0	1670	54.237	116.625	0.917	295.764	22959	1.298	0.771	0.952	3.77125
1261	NCS1_KAN703-6_1.tif:0016-1053	2.1	101.982	0	936	18.458	119.627	0.842	214.142	16623	1.195	0.837	0.945	2.73049
1262	NCS1_KAN703-6_1.tif:0017-1093	2.512	118.179	0	1051	46.989	124.122	0.865	296.871	23045	1.587	0.63	0.935	3.78537
1263	NCS1_KAN703-6_1.tif:0018-1163	1.842	131	0	1344	92.366	132.026	0.962	241.323	18733	1.157	0.864	0.947	3.07708
1264	NCS1_KAN703-6_1.tif:0019-1182	1.765	88.839	0	909	10.695	134.191	0.83	156.79	12171	1.613	0.62	0.926	1.99921
1265	NCS1_KAN703-6_2.tif:0001-0076	1.662	188.078	0	1334	32.122	8.604	0.939	312.549	24262	1.105	0.905	0.956	3.98528
1266	NCS1_KAN703-6_2.tif:0002-0096	1.984	186.981	0	1630	87.779	10.923	0.909	370.944	28795	1.203	0.831	0.969	4.72987
1267	NCS1_KAN703-6_2.tif:0003-0177	2.074	172.553	0	1740	124.639	20.129	0.886	357.882	27781	1.237	0.809	0.933	4.56331
1268	NCS1_KAN703-6_2.tif:0004-0201	1.881	210.671	0	1629	67.104	22.805	0.956	396.232	30758	1.169	0.855	0.954	5.05231
1269	NCS1_KAN703-6_2.tif:0005-0264	1.469	51.64	0	141	23.661	29.983	0.943	75.838	5887	1.327	0.753	0.962	0.966999
1270	NCS1_KAN703-6_2.tif:0006-0335	1.997	166.981	0	1605	102.381	38.071	0.905	333.418	25882	1.192	0.839	0.942	4.25138
1271	NCS1_KAN703-6_2.tif:0007-0389	2.641	175.127	0	2510	69.696	44.119	0.845	462.486	35901	1.602	0.624	0.947	5.8971
1272	NCS1_KAN703-6_2.tif:0008-0420	1.739	252.148	0	2162	54.132	47.697	0.971	438.512	34040	1.082	0.924	0.954	5.59141
1273	NCS1_KAN703-6_2.tif:0009-0481	2.216	94.599	0	1006	31.731	54.617	0.863	209.607	16271	1.593	0.628	0.927	2.67268
1274	NCS1_KAN703-6_2.tif:0010-0517	1.804	205.057	0	1853	15.848	58.745	0.917	369.824	28708	1.202	0.832	0.936	4.71558
1275	NCS1_KAN703-6_2.tif:0011-0585	2.203	127.573	0	1229	5.834	66.37	0.954	281.026	21815	1.287	0.777	0.94	3.58333
1276	NCS1_KAN703-6_2.tif:0012-0621	2.113	153.055	0	1548	18.747	70.564	0.934	323.357	25101	1.259	0.794	0.968	4.12309
1277	NCS1_KAN703-6_2.tif:0013-0655	2.499	189.655	0	2223	109.051	74.377	0.9	473.977	36793	1.259	0.794	0.926	6.04362
1278	NCS1_KAN703-6_2.tif:0014-0685	1.752	112.162	0	620	42.971	77.721	0.901	196.506	15254	1.336	0.749	0.948	2.50562
1279	NCS1_KAN703-6_2.tif:0015-0714	1.726	178.463	0	1749	71.129	81.095	0.888	308.066	23914	1.271	0.787	0.954	3.92812
1280	NCS1_KAN703-6_2.tif:0016-0921	1.958	148.467	0	1541	94.095	104.535	0.92	290.714	22567	1.27	0.787	0.956	3.70686
1281	NCS1_KAN703-6_2.tif:0017-0926	2.138	126.133	0	708	133.412	105.087	0.95	269.729	20938	1.232	0.812	0.933	3.43928
1282	NCS1_KAN703-6_2.tif:0018-0929	1.778	153.471	0	1175	144.076	105.472	0.965	272.833	21179	1.1	0.909	0.955	3.47886
1283	NCS1_KAN703-6_2.tif:0019-0940	2.345	152.478	0	1701	81.433	106.741	0.901	357.495	27751	1.31	0.763	0.95	4.55838
1284	NCS1_KAN703-6_2.tif:0020-1015	2.19	144.476	0	1697	25.114	115.302	0.903	316.401	24561	1.283	0.78	0.929	4.03439
1285	NCS1_KAN703-6_2.tif:0021-1167	1.829	97.211	0	529	51.182	132.466	0.906	177.827	13804	1.369	0.73	0.94	2.26745
1286	NCS1_KAN703-6_3.tif:0001-0107	2.177	155.888	0	1592	53.273	12.173	0.907	339.383	26345	1.258	0.795	0.947	4.32743
1287	NCS1_KAN703-6_3.tif:0002-0208	2.242	164.029	0	1390	135.366	23.606	0.947	367.672	28541	1.148	0.871	0.941	4.68815
1288	NCS1_KAN703-6_3.tif:0003-0232	2.113	183.47	0	1935	14.766	26.389	0.925	387.614	30089	1.21	0.827	0.943	4.94242
1289	NCS1_KAN703-6_3.tif:0004-0273	2.357	155.951	0	1607	40.058	30.958	0.877	367.647	28539	1.332	0.751	0.948	4.68782
1290	NCS1_KAN703-6_3.tif:0005-0339	2.1	189.294	0	1885	115.318	38.523	0.952	397.482	30855	1.25	0.8	0.97	5.06824
1291	NCS1_KAN703-6_3.tif:0006-0483	2.19	125.541	0	964	27.544	54.813	0.935	274.933	21342	1.335	0.749	0.958	3.50564
1292	NCS1_KAN703-6_3.tif:0007-0575	1.7	108.742	0	871	43.997	65.266	0.977	184.912	14354	1.102	0.907	0.943	2.35779
1293	NCS1_KAN703-6_3.tif:0008-0606	2.628	165.922	0	1800	82.299	68.868	0.897	436.038	33848	1.463	0.684	0.942	5.55987
1294	NCS1_KAN703-6_3.tif:0009-0631	2.087	105.926	0	428	134.782	71.597	0.923	221.059	17160	1.315	0.761	0.959	2.8187
1295	NCS1_KAN703-6_3.tif:0010-0663	2.718	136.166	0	860	70.132	75.314	0.837	370.12	28731	1.678	0.596	0.919	4.71936
1296	NCS1_KAN703-6_3.tif:0011-0662	2.035	90.88	0	355	105.09	75.189	0.923	184.976	14359	1.284	0.779	0.952	2.35861
1297	NCS1_KAN703-6_3.tif:0012-0705	2.409	182.754	0	1696	124.157	80.014	0.876	440.251	34175	1.402	0.713	0.947	5.61359
1298	NCS1_KAN703-6_3.tif:0013-0707	2.151	154.617	0	1513	15.707	80.303	0.919	332.633	25821	1.195	0.837	0.941	4.24136
1299	NCS1_KAN703-6_3.tif:0014-0816	2.023	120.955	0	1291	4.367	92.621	0.894	244.634	18990	1.296	0.772	0.952	3.1193
1300	NCS1_KAN703-6_3.tif:0015-0904	1.984	139.935	0	1445	33.05	102.664	0.899	277.613	21550	1.303	0.768	0.939	3.5398
1301	NCS1_KAN703-6_3.tif:0016-0912	1.391	166.13	0	873	7.346	103.609	0.962	231.133	17942	1.006	0.994	0.96	2.94715
1302	NCS1_KAN703-6_3.tif:0017-0921	2.01	98.372	0	1188	97.32	104.522	0.787	197.691	15346	2.002	0.5	0.981	2.52073
1303	NCS1_KAN703-6_3.tif:0018-1157	1.791	146.597	0	826	132.258	131.304	0.972	262.502	20377	1.085	0.922	0.955	3.34713
1304	NCS1_KAN703-6_3.tif:0019-1226	1.7	73.591	0	339	94.389	139.114	0.923	125.138	9714	1.339	0.747	0.943	1.59562
1305	NCS1_KAN703-6_4.tif:0001-0060	1.636	128.394	0	555	23.05	6.838	0.951	210.058	16306	1.051	0.951	0.951	2.67842
1306	NCS1_KAN703-6_4.tif:0002-0123	2.126	70.424	0	269	17.691	14.048	0.836	149.692	11620	1.717	0.582	0.922	1.9087
1307	NCS1_KAN703-6_4.tif:0003-0175	2.808	127.688	0	1306	102.281	19.826	0.83	358.59	27836	1.622	0.616	0.914	4.57234
1308	NCS1_KAN703-6_4.tif:0004-0281	2.383	92.184	0	729	52.318	31.87	0.886	219.694	17054	1.335	0.749	0.934	2.80129
1309	NCS1_KAN703-6_4.tif:0005-0293	2.1	284.362	0	2813	117.288	33.296	0.906	597.105	46351	1.082	0.924	0.956	7.61362
1310	NCS1_KAN703-6_4.tif:0006-0297	2.28	170.446	0	1755	86.031	33.746	0.918	388.645	30169	1.292	0.774	0.944	4.95556
1311	NCS1_KAN703-6_4.tif:0007-0359	1.546	28.158	0	105	137.439	40.749	0.898	43.529	3379	1.461	0.684	0.941	0.555035
1312	NCS1_KAN703-6_4.tif:0008-0444	1.546	53.708	0	201	51.723	50.435	0.925	83.026	6445	1.258	0.795	0.934	1.05866
1313	NCS1_KAN703-6_4.tif:0009-0514	2.821	92.995	0	506	63.262	58.389	0.831	262.36	20366	1.554	0.644	0.944	3.34532
1314	NCS1_KAN703-6_4.tif:0010-0557	2.151	214.251	0	2453	89.59	63.301	0.965	460.927	35780	1.194	0.837	0.949	5.87722
1315	NCS1_KAN703-6_4.tif:0011-0706	1.816	182.922	0	1487	15.497	80.149	0.909	332.259	25792	1.083	0.923	0.959	4.2366
1316	NCS1_KAN703-6_4.tif:0012-0794	2.705	115.467	0	1092	47.05	90.101	0.84	312.369	24248	1.257	0.796	0.911	3.98298
1317	NCS1_KAN703-6_4.tif:0013-0868	2.538	141.102	0	1454	130.332	98.489	0.822	358.088	27797	1.452	0.689	0.9	4.56594
1318	NCS1_KAN703-6_4.tif:0014-0868	1.778	160.094	0	1548	62.684	98.47	0.88	284.608	22093	1.433	0.698	0.945	3.629
1319	NCS1_KAN703-6_4.tif:0015-0884	2.525	121.469	0	1434	104.981	100.389	0.833	306.701	23808	1.528	0.654	0.929	3.9107
1320	NCS1_KAN703-6_4.tif:0016-0907	2.461	98.047	0	861	85.887	102.975	0.829	241.246	18727	1.399	0.715	0.907	3.0761
1321	NCS1_KAN703-6_4.tif:0017-0926	2.409	120.08	0	975	117.166	105.094	0.795	289.271	22455	1.505	0.665	0.895	3.68846
1322	NCS1_KAN703-6_4.tif:0018-1106	1.662	126.062	0	585	22.143	125.512	0.939	209.491	16262	1.145	0.873	0.956	2.6712
1323	NCS1_KAN703-6_4.tif:0019-1120	1.417	123.709	0	913	128.158	127.089	0.894	175.302	13608	1.202	0.832	0.961	2.23525
1324	NCS1_KAN703-6_4.tif:0020-1170	2.19	174.359	0	1728	41.815	132.88	0.761	381.843	29641	1.483	0.674	0.881	4.86883
1325	NCS1_KAN703-6_4.tif:0021-1258	2.19	109.712	0	1036	17.339	142.877	0.842	240.267	18651	1.576	0.634	0.939	3.06361
1326	NCS1_KAN703-6_5.tif:0001-0111	1.804	147.343	0	1290	135.306	12.586	0.893	265.735	20628	1.383	0.723	0.94	3.38836
1327	NCS1_KAN703-6_5.tif:0002-0230	2.589	142.736	0	2156	16.339	26.117	0.865	369.592	28690	1.504	0.665	0.918	4.71262
1328	NCS1_KAN703-6_5.tif:0003-0238	2.023	196.758	0	1904	138.153	27.124	0.941	397.946	30891	1.136	0.88	0.954	5.07416
1329	NCS1_KAN703-6_5.tif:0004-0338	3.053	136.928	0	1557	72.863	38.36	0.836	418.055	32452	1.782	0.561	0.919	5.33057
1330	NCS1_KAN703-6_5.tif:0005-0408	1.984	79.344	0	539	34.14	46.28	0.868	157.408	12219	1.478	0.677	0.925	2.00709
1331	NCS1_KAN703-6_5.tif:0006-0445	2.293	158.865	0	1813	51.822	50.614	0.893	364.284	28278	1.266	0.79	0.925	4.64495
1332	NCS1_KAN703-6_5.tif:0007-0488	2.589	139.348	0	1326	56.228	55.48	0.811	360.819	28009	1.451	0.689	0.903	4.60076
1333	NCS1_KAN703-6_5.tif:0008-0489	2.757	137.949	0	1608	115.062	55.587	0.815	380.297	29521	1.525	0.656	0.907	4.84912
1334	NCS1_KAN703-6_5.tif:0009-0496	2.911	259.416	0	3699	99.982	56.291	0.843	755.261	58628	1.47	0.68	0.915	9.63024
1335	NCS1_KAN703-6_5.tif:0010-0601	1.945	143.159	0	1535	19.362	68.285	0.938	278.476	21617	1.177	0.849	0.962	3.55081
1336	NCS1_KAN703-6_5.tif:0011-0602	2.28	73.316	0	367	40.122	68.356	0.73	167.173	12977	1.734	0.577	0.857	2.1316
1337	NCS1_KAN703-6_5.tif:0012-0623	2.654	152.908	0	1499	105.109	70.699	0.867	405.778	31499	1.346	0.743	0.918	5.17403
1338	NCS1_KAN703-6_5.tif:0013-0751	2.564	123.291	0	1266	59.475	85.279	0.831	316.066	24535	1.637	0.611	0.905	4.03012
1339	NCS1_KAN703-6_5.tif:0014-0812	1.919	187.913	0	1486	15.254	92.192	0.926	360.69	27999	1.199	0.834	0.961	4.59912
1340	NCS1_KAN703-6_5.tif:0015-0826	2.151	94.874	0	500	81.82	93.789	0.887	204.106	15844	1.342	0.745	0.91	2.60254
1341	NCS1_KAN703-6_5.tif:0016-0915	2.615	146.069	0	1893	129.233	103.909	0.873	381.985	29652	1.423	0.703	0.921	4.87064
1342	NCS1_KAN703-6_5.tif:0017-0996	2.087	129.549	0	1141	103.171	113.059	0.913	270.36	20987	1.239	0.807	0.936	3.44733
1343	NCS1_KAN703-6_5.tif:0018-0998	2.499	100.222	0	1274	93.607	113.227	0.835	250.47	19443	1.517	0.659	0.909	3.19371
1344	NCS1_KAN703-6_5.tif:0019-1044	2.68	122.625	0	1158	133.281	118.552	0.876	328.575	25506	1.34	0.746	0.929	4.18962
1345	NCS1_KAN703-6_5.tif:0020-1108	1.7	107.333	0	627	28.536	125.812	0.898	182.516	14168	1.064	0.94	0.943	2.32724
1346	NCS1_KAN703-6_5.tif:0021-1125	1.997	108.697	0	961	62.115	127.738	0.896	217.04	16848	1.106	0.904	0.931	2.76745
1347	NCS1_KAN703-6_5.tif:0022-1244	1.997	150.103	0	1278	107.987	141.21	0.905	299.718	23266	1.344	0.744	0.937	3.82167
1348	NCS1_KAN703-6_6.tif:0001-0060	2.357	138.366	0	1349	58.925	6.939	0.897	326.192	25321	1.257	0.795	0.936	4.15923
1349	NCS1_KAN703-6_6.tif:0002-0113	1.713	126.85	0	456	64.963	12.873	0.915	217.336	16871	1.197	0.835	0.967	2.77123
1350	NCS1_KAN703-6_6.tif:0003-0146	2.525	120.985	0	1660	119.937	16.554	0.825	305.477	23713	1.598	0.626	0.905	3.8951
1351	NCS1_KAN703-6_6.tif:0004-0204	3.002	135.631	0	1891	105.466	23.158	0.828	407.105	31602	1.155	0.865	0.901	5.19095
1352	NCS1_KAN703-6_6.tif:0005-0252	2.976	130.238	0	1935	38.862	28.603	0.783	387.563	30085	1.704	0.587	0.895	4.94176
1353	NCS1_KAN703-6_6.tif:0006-0309	1.778	139.493	0	647	19.479	35.117	0.924	247.983	19250	1.18	0.847	0.986	3.16201
1354	NCS1_KAN703-6_6.tif:0007-0336	2.551	101.066	0	776	66.388	38.23	0.852	257.787	20011	1.208	0.828	0.915	3.28701
1355	NCS1_KAN703-6_6.tif:0008-0401	2.95	88.074	0	634	89.626	45.539	0.854	259.822	20169	1.437	0.696	0.923	3.31296
1356	NCS1_KAN703-6_6.tif:0009-0470	2.035	182.184	0	1827	140.071	53.412	0.9	370.816	28785	1.219	0.82	0.952	4.72823
1357	NCS1_KAN703-6_6.tif:0010-0501	1.804	67.157	0	264	49.394	56.967	0.848	121.119	9402	1.272	0.786	0.924	1.54437
1358	NCS1_KAN703-6_6.tif:0011-0549	2.409	98.513	0	1055	22.207	62.318	0.812	237.317	18422	1.744	0.573	0.928	3.026
1359	NCS1_KAN703-6_6.tif:0012-0576	2.744	124.263	0	1745	104.865	65.428	0.87	340.967	26468	1.454	0.688	0.92	4.34764
1360	NCS1_KAN703-6_6.tif:0013-0662	2.641	9.371	0	55	28.141	75.101	0.682	24.747	1921	1.684	0.594	0.812	0.315544
1361	NCS1_KAN703-6_6.tif:0014-0711	1.868	174.552	0	1573	66.499	80.733	0.901	326.05	25310	1.39	0.719	0.951	4.15742
1362	NCS1_KAN703-6_6.tif:0015-0719	2.873	105.404	0	980	132.663	81.736	0.892	302.797	23505	1.259	0.794	0.943	3.86093
1363	NCS1_KAN703-6_6.tif:0016-0878	2.628	111.51	0	1260	35.113	99.731	0.851	293.045	22748	1.547	0.646	0.919	3.73659
1364	NCS1_KAN703-6_6.tif:0017-0876	2.254	94.703	0	579	95.344	99.515	0.887	213.498	16573	1.389	0.72	0.938	2.72228
1365	NCS1_KAN703-6_6.tif:0018-1041	2.473	111.646	0	735	107.801	118.178	0.891	276.144	21436	1.463	0.683	0.941	3.52108
1366	NCS1_KAN703-6_6.tif:0019-1081	2.035	161.5	0	1665	57.259	122.719	0.878	328.716	25517	1.385	0.722	0.952	4.19142
1367	NCS1_KAN703-6_6.tif:0020-1089	1.366	80.443	0	224	21.657	123.627	0.916	109.847	8527	1.353	0.739	0.968	1.40065
1368	NCS1_KAN703-6_6.tif:0021-1163	2.422	115.734	0	1294	120.653	131.986	0.809	280.292	21758	1.672	0.598	0.891	3.57397
										23349.3				3.83537
1369	NCS1_KAN703-7_1.tif:0001-0054	1.507	17.205	0	71	42.985	6.11	0.818	25.932	2013	1.876	0.533	0.907	0.330655
1370	NCS1_KAN703-7_1.tif:0002-0063	1.881	7.425	0	58	142.509	7.105	0.684	13.964	1084	1.897	0.527	0.834	0.178058
1371	NCS1_KAN703-7_1.tif:0003-0082	1.971	182.967	0	753	45.38	9.315	0.926	360.626	27994	1.088	0.919	0.971	4.5983
1372	NCS1_KAN703-7_1.tif:0004-0102	2.461	99.241	0	633	75.301	11.548	0.867	244.183	18955	1.338	0.748	0.918	3.11355
1373	NCS1_KAN703-7_1.tif:0005-0196	1.61	273.408	0	1726	32.448	22.299	0.975	440.264	34176	1.095	0.914	0.977	5.61375
1374	NCS1_KAN703-7_1.tif:0006-0512	2.306	143.698	0	1001	134.18	58.16	0.886	331.357	25722	1.552	0.644	0.96	4.2251
1375	NCS1_KAN703-7_1.tif:0007-0682	1.919	242.04	0	1553	93.291	77.397	0.976	464.586	36064	1.186	0.843	0.958	5.92387
1376	NCS1_KAN703-7_1.tif:0008-0917	2.216	24.826	0	132	62.906	104.058	0.936	55.007	4270	1.195	0.837	0.932	0.70139
1377	NCS1_KAN703-7_1.tif:0009-0922	2.19	194.124	0	1676	85.344	104.65	0.87	425.127	33001	1.424	0.702	0.95	5.42075
1378	NCS1_KAN703-7_1.tif:0010-1042	3.246	142.615	0	1190	39.003	118.24	0.838	462.975	35939	1.242	0.805	0.9	5.90334
1379	NCS1_KAN703-7_1.tif:0011-1087	1.984	150.623	0	1237	131.475	123.377	0.877	298.817	23196	1.596	0.627	0.951	3.81018
1380	NCS1_KAN703-7_2.tif:0001-0161	1.597	31.016	0	132	82.205	18.34	0.928	49.545	3846	1.288	0.777	0.95	0.631744
1381	NCS1_KAN703-7_2.tif:0002-0229	3.452	141.552	0	516	42.608	26.047	0.865	488.701	37936	1.555	0.643	0.966	6.23137
1382	NCS1_KAN703-7_2.tif:0003-0283	1.366	20.396	0	105	61.871	32.158	0.904	27.851	2162	1.486	0.673	0.934	0.35513
1383	NCS1_KAN703-7_2.tif:0004-0607	1.662	138.558	0	809	39.044	68.949	0.966	230.257	17874	1.051	0.951	0.966	2.93598
1384	NCS1_KAN703-7_2.tif:0005-0631	1.675	230.438	0	1963	100.032	71.704	0.935	385.914	29957	1.155	0.866	0.945	4.92074
1385	NCS1_KAN703-7_2.tif:0006-0790	1.726	189.784	0	1088	11.881	89.742	0.922	327.609	25431	1.202	0.832	0.971	4.1773
1386	NCS1_KAN703-7_2.tif:0007-0804	1.559	8.041	0	70	107.428	91.313	0.772	12.534	973	1.693	0.591	0.883	0.159825
1387	NCS1_KAN703-7_2.tif:0008-0867	1.842	255.252	0	1494	97.396	98.464	0.922	470.215	36501	1.282	0.78	0.969	5.99566
1388	NCS1_KAN703-7_3.tif:0001-0126	1.984	123.675	0	848	68.476	14.372	0.899	245.355	19046	1.145	0.874	0.942	3.1285
1389	NCS1_KAN703-7_3.tif:0002-0306	2.564	126.442	0	1112	133.574	34.729	0.81	324.143	25162	1.711	0.584	0.948	4.13311
1390	NCS1_KAN703-7_3.tif:0003-0354	1.739	6.867	0	54	34.133	40.168	0.675	11.942	927	2.318	0.431	0.891	0.152269
1391	NCS1_KAN703-7_3.tif:0004-0449	1.327	5.252	0	37	32.939	50.932	0.918	6.969	541	1.203	0.831	0.941	0.0888647
1392	NCS1_KAN703-7_3.tif:0005-0530	2.074	6.025	0	30	22.359	60.243	0.965	12.496	970	1.216	0.822	0.961	0.159332
1393	NCS1_KAN703-7_3.tif:0006-0549	1.469	11.237	0	57	80.457	62.302	0.927	16.502	1281	1.206	0.829	0.979	0.210417
1394	NCS1_KAN703-7_3.tif:0007-0630	2.242	108.69	0	953	96.465	71.465	0.85	243.629	18912	1.399	0.715	0.953	3.10649
1395	NCS1_KAN703-7_3.tif:0008-0924	1.791	127.23	0	857	77.882	104.932	0.921	227.823	17685	1.312	0.762	0.959	2.90494
1396	NCS1_KAN703-7_3.tif:0009-1020	2.267	125.33	0	1150	28.955	115.809	0.913	284.157	22058	1.49	0.671	0.949	3.62325
1397	NCS1_KAN703-7_3.tif:0010-1236	1.7	92.788	0	416	5.103	140.383	0.851	157.782	12248	1.597	0.626	0.953	2.01186
1398	NCS1_KAN703-7_3.tif:0011-1253	1.739	99.896	0	527	32.705	142.273	0.894	173.73	13486	1.394	0.717	0.951	2.21521
1399	NCS1_KAN703-7_4.tif:0001-0293	1.907	149.905	0	776	45.074	33.229	0.944	285.806	22186	1.177	0.85	0.958	3.64427
1400	NCS1_KAN703-7_4.tif:0002-0382	2.267	119.472	0	769	86.574	43.402	0.824	270.875	21027	1.625	0.615	0.917	3.4539
1401	NCS1_KAN703-7_4.tif:0003-0387	1.34	10.327	0	65	71.545	43.998	0.671	13.836	1074	2.618	0.382	0.878	0.176415
1402	NCS1_KAN703-7_4.tif:0004-0583	1.907	209.811	0	1790	98.269	66.189	0.944	400.02	31052	1.308	0.764	0.961	5.1006
1403	NCS1_KAN703-7_4.tif:0005-0636	1.907	214.088	0	1329	82.515	72.199	0.969	408.174	31685	1.248	0.801	0.958	5.20458
1404	NCS1_KAN703-7_4.tif:0006-0644	1.855	135.028	0	765	23.645	73.126	0.919	250.483	19444	1.176	0.851	0.947	3.19387
1405	NCS1_KAN703-7_4.tif:0007-0807	2.293	173.416	0	1989	74.242	91.58	0.902	397.649	30868	1.468	0.681	0.952	5.07038
1406	NCS1_KAN703-7_4.tif:0008-0926	1.649	127.07	0	365	81.829	105.126	0.931	209.53	16265	1.033	0.968	0.952	2.67169
1407	NCS1_KAN703-7_4.tif:0009-1035	1.52	156.576	0	834	29.315	117.498	0.92	238.012	18476	1.128	0.887	0.955	3.03487
1408	NCS1_KAN703-7_4.tif:0010-1079	2.203	106.216	0	459	23.5	122.414	0.783	233.98	18163	1.878	0.533	0.924	2.98346
1409	NCS1_KAN703-7_4.tif:0011-1144	1.804	168.729	0	1285	47.679	129.809	0.87	304.305	23622	1.274	0.785	0.918	3.88015
1410	NCS1_KAN703-7_5.tif:0001-0107	1.804	155.75	0	648	101.767	12.137	0.927	280.898	21805	1.127	0.888	0.956	3.58169
1411	NCS1_KAN703-7_5.tif:0002-0182	1.456	9.221	0	62	94.722	20.678	0.657	13.423	1042	2.77	0.361	0.958	0.171159
1412	NCS1_KAN703-7_5.tif:0003-0241	1.443	55.893	0	196	109.004	27.414	0.967	80.643	6260	1.02	0.98	0.97	1.02827
1413	NCS1_KAN703-7_5.tif:0004-0259	1.636	13.276	0	105	90.09	29.387	0.81	21.719	1686	1.858	0.538	0.907	0.276942
1414	NCS1_KAN703-7_5.tif:0005-0325	1.984	151.519	0	971	66.856	36.911	0.957	300.594	23334	1.2	0.833	0.966	3.83284
1415	NCS1_KAN703-7_5.tif:0006-0485	1.43	64.36	0	297	130.397	55.045	0.959	92.031	7144	1.193	0.839	0.965	1.17347
1416	NCS1_KAN703-7_5.tif:0007-0513	2.86	137.135	0	2009	66.809	58.281	0.698	392.187	30444	1.998	0.5	0.892	5.00073
1417	NCS1_KAN703-7_5.tif:0008-0705	2.138	110.892	0	761	35.645	80.076	0.841	237.136	18408	1.614	0.62	0.925	3.0237
1418	NCS1_KAN703-7_5.tif:0009-0942	1.7	100.288	0	397	11.617	106.914	0.884	170.535	13238	1.042	0.959	0.967	2.17447
1419	NCS1_KAN703-7_5.tif:0010-1146	1.919	145.893	0	631	104.113	130.064	0.926	280.034	21738	1.183	0.845	0.955	3.57069
1420	NCS1_KAN703-7_6.tif:0001-0084	1.353	32.867	0	135	144.543	9.612	0.907	44.457	3451	1.456	0.687	0.963	0.566861
1421	NCS1_KAN703-7_6.tif:0002-0196	1.507	64.932	0	178	68.422	22.267	0.94	97.866	7597	1.146	0.873	0.955	1.24788
1422	NCS1_KAN703-7_6.tif:0003-0240	2.035	169.911	0	1044	32.653	27.231	0.947	345.837	26846	1.179	0.848	0.952	4.40973
1423	NCS1_KAN703-7_6.tif:0004-0263	1.494	19.336	0	96	95.75	29.819	0.905	28.895	2243	1.388	0.721	0.963	0.368435
1424	NCS1_KAN703-7_6.tif:0005-0412	1.842	134.853	0	755	6.992	46.838	0.937	248.421	19284	1.248	0.801	0.944	3.16759
1425	NCS1_KAN703-7_6.tif:0006-0434	1.559	9.025	0	78	142.233	49.23	0.814	14.067	1092	1.825	0.548	0.896	0.179372
1426	NCS1_KAN703-7_6.tif:0007-0465	1.778	97.5	0	435	51.647	52.847	0.939	173.331	13455	1.292	0.774	0.958	2.21012
1427	NCS1_KAN703-7_6.tif:0008-0703	1.61	213.064	0	1169	121.582	79.843	0.947	343.093	26633	1.09	0.918	0.98	4.37474
1428	NCS1_KAN703-7_6.tif:0009-0861	1.688	185.511	0	1073	7.906	97.753	0.927	313.064	24302	1.212	0.825	0.967	3.99185
1429	NCS1_KAN703-7_6.tif:0010-0907	2.538	166.609	0	1846	82.84	103.051	0.788	422.821	32822	1.694	0.59	0.891	5.39134
1430	NCS1_KAN703-7_6.tif:0011-0997	2.486	117.026	0	1171	40.556	113.232	0.823	290.959	22586	1.756	0.569	0.917	3.70998
1431	NCS1_KAN703-7_6.tif:0012-1103	2.19	65.571	0	600	115.264	125.167	0.861	143.598	11147	1.523	0.656	0.929	1.83101
1432	NCS1_KAN703-7_6.tif:0013-1124	1.778	115.993	0	548	18.766	127.639	0.939	206.206	16007	1.155	0.865	0.955	2.62931
1433	NCS1_KAN703-7_6.tif:0014-1225	1.649	103.18	0	690	51.691	139.108	0.825	170.136	13207	1.441	0.694	0.911	2.16938
1434	NCS1_KAN703-7_6.tif:0015-1266	1.662	133.566	0	849	134.9	143.754	0.864	221.961	17230	1.313	0.762	0.952	2.8302
										17367.8				2.85283

## Sheet: Replicate No.2 (KAN708)
	Label	Area	Mean	Min	Max	X	Y	Circ	IntDen	RawIntDen	AR	Round	Solidity
1	NCS1_KAN708-1_1.tif:0001-0079	1.804	28.493	0	285	15.87	8.981	0.942	51.387	3989	1.223	0.817	0.936	1.37264
2	NCS1_KAN708-1_1.tif:0002-0238	1.907	62.304	0	667	37.398	27.129	0.896	118.787	9221	1.075	0.93	0.952	3.173
3	NCS1_KAN708-1_1.tif:0003-0304	1.636	24.417	0	158	73.237	34.46	0.874	39.948	3101	1.467	0.682	0.962	1.06707
4	NCS1_KAN708-1_1.tif:0004-0351	1.791	56.482	0	617	14.569	39.846	0.911	101.139	7851	1.25	0.8	0.949	2.70157
5	NCS1_KAN708-1_1.tif:0005-0511	1.288	6.13	0	42	7.886	57.986	0.932	7.897	613	1.346	0.743	0.971	0.210937
6	NCS1_KAN708-1_1.tif:0006-0549	1.907	23.385	0	155	65.291	62.318	0.934	44.585	3461	1.201	0.833	0.928	1.19095
7	NCS1_KAN708-1_1.tif:0007-0655	1.456	11.673	0	54	106.526	74.321	0.935	16.992	1319	1.096	0.912	0.942	0.453875
8	NCS1_KAN708-1_1.tif:0008-0660	1.469	39.912	0	219	135.062	74.888	0.9	58.614	4550	1.183	0.845	0.974	1.56568
9	NCS1_KAN708-1_1.tif:0009-0726	1.958	34.592	0	269	10.917	82.47	0.934	67.735	5258	1.124	0.89	0.93	1.80931
10	NCS1_KAN708-1_1.tif:0010-0752	1.816	23.638	0	175	16.554	85.38	0.876	42.937	3333	1.432	0.698	0.943	1.1469
11	NCS1_KAN708-1_1.tif:0011-0906	2.048	23.365	0	288	94.706	102.793	0.853	47.858	3715	1.46	0.685	0.944	1.27835
12	NCS1_KAN708-1_1.tif:0012-0973	1.353	27.114	0	104	40.976	110.437	0.858	36.676	2847	1.729	0.578	0.921	0.979668
13	NCS1_KAN708-1_1.tif:0013-1054	1.804	10.564	0	92	83.491	119.705	0.87	19.053	1479	1.468	0.681	0.936	0.508932
14	NCS1_KAN708-1_1.tif:0014-1139	1.353	33.952	0	216	112.447	129.347	0.935	45.925	3565	1.08	0.926	0.946	1.22674
15	NCS1_KAN708-1_1.tif:0015-1210	1.469	55.061	0	419	68.712	137.341	0.916	80.862	6277	1.297	0.771	0.946	2.15995
16	NCS1_KAN708-1_1.tif:0016-1231	2.126	18.048	0	111	35.391	139.814	0.836	38.363	2978	1.562	0.64	0.917	1.02475
17	NCS1_KAN708-1_2.tif:0001-0083	1.713	18.579	0	149	130.295	9.445	0.984	31.832	2471	1.092	0.916	0.947	0.850285
18	NCS1_KAN708-1_2.tif:0002-0195	1.713	13.699	0	114	28.242	22.12	0.905	23.471	1822	1.297	0.771	0.947	0.62696
19	NCS1_KAN708-1_2.tif:0003-0288	2.267	4.619	0	26	143.214	32.776	0.771	10.473	813	1.796	0.557	0.929	0.279758
20	NCS1_KAN708-1_2.tif:0004-0298	1.649	7.719	0	86	114.718	33.78	0.931	12.728	988	1.093	0.915	0.955	0.339976
21	NCS1_KAN708-1_2.tif:0005-0387	2.306	5.318	0	34	60.575	44.035	0.898	12.264	952	1.315	0.76	0.932	0.327588
22	NCS1_KAN708-1_2.tif:0006-0475	1.894	37.871	0	249	33.42	53.951	0.913	71.715	5567	1.407	0.711	0.955	1.91564
23	NCS1_KAN708-1_2.tif:0007-0578	2.486	84.109	0	1176	82.448	65.738	0.884	209.118	16233	1.015	0.985	0.948	5.58586
24	NCS1_KAN708-1_2.tif:0008-0897	1.52	6.695	0	50	122.353	101.898	0.948	10.177	790	1.103	0.907	0.959	0.271843
25	NCS1_KAN708-1_2.tif:0009-0919	1.919	8.772	0	60	116.639	104.282	0.926	16.837	1307	1.157	0.864	0.958	0.449746
26	NCS1_KAN708-1_2.tif:0010-0930	1.61	37.616	0	455	48.383	105.647	0.925	60.572	4702	1.115	0.897	0.923	1.61798
27	NCS1_KAN708-1_2.tif:0011-0959	1.494	7.302	0	30	73.104	108.91	0.905	10.911	847	1.101	0.908	0.939	0.291457
28	NCS1_KAN708-1_2.tif:0012-1103	1.675	8.631	0	84	119.33	125.192	0.909	14.454	1122	1.202	0.832	0.932	0.386086
29	NCS1_KAN708-1_3.tif:0001-0070	1.791	30.014	0	286	118.59	8.003	0.921	53.745	4172	1.107	0.904	0.955	1.43561
30	NCS1_KAN708-1_3.tif:0002-0137	1.636	5.031	0	31	60.086	15.561	0.951	8.232	639	1.012	0.988	0.958	0.219883
31	NCS1_KAN708-1_3.tif:0003-0160	1.61	13.112	0	88	94.306	18.212	0.92	21.114	1639	1.132	0.883	0.977	0.563989
32	NCS1_KAN708-1_3.tif:0004-0354	2.602	36.332	0	421	123.618	40.291	0.815	94.543	7339	1.525	0.656	0.918	2.52539
33	NCS1_KAN708-1_3.tif:0005-0489	1.752	9.993	0	67	19.777	55.515	0.978	17.507	1359	1.117	0.895	0.951	0.467639
34	NCS1_KAN708-1_3.tif:0006-0492	1.34	5.423	0	22	47.565	55.889	0.969	7.266	564	1.108	0.903	0.977	0.194076
35	NCS1_KAN708-1_3.tif:0007-0580	3.014	6.671	0	32	65.908	65.778	0.8	20.109	1561	1.686	0.593	0.909	0.537149
36	NCS1_KAN708-1_3.tif:0008-0593	1.932	6.08	0	35	118.78	67.366	0.922	11.749	912	1.256	0.796	0.946	0.313824
37	NCS1_KAN708-1_3.tif:0009-0601	1.327	10.049	0	36	17.763	68.22	0.93	13.333	1035	1.199	0.834	0.972	0.356149
38	NCS1_KAN708-1_3.tif:0010-0646	1.752	8.574	0	84	141.053	73.362	0.877	15.021	1166	1.53	0.653	0.961	0.401227
39	NCS1_KAN708-1_3.tif:0011-0700	1.752	17	0	144	97.292	79.503	0.951	29.784	2312	1.183	0.845	0.948	0.795572
40	NCS1_KAN708-1_3.tif:0012-0951	2.448	43.384	0	519	17.831	107.937	0.783	106.188	8243	1.926	0.519	0.916	2.83646
41	NCS1_KAN708-1_3.tif:0013-0979	1.907	17.899	0	215	69.543	111.159	0.934	34.125	2649	1.166	0.858	0.949	0.911536
42	NCS1_KAN708-1_3.tif:0014-1162	1.443	9.312	0	76	122.598	131.914	0.955	13.436	1043	1.233	0.811	0.945	0.358902
43	NCS1_KAN708-1_3.tif:0015-1190	1.494	4.103	0	19	87.169	135.144	0.932	6.132	476	1.198	0.835	0.955	0.163794
44	NCS1_KAN708-1_3.tif:0016-1233	1.804	9.243	0	106	102.758	139.993	0.968	16.67	1294	1.121	0.892	0.946	0.445273
45	NCS1_KAN708-1_3.tif:0017-1238	1.765	33.489	0	331	60.997	140.551	0.83	59.104	4588	1.264	0.791	0.907	1.57876
46	NCS1_KAN708-1_4.tif:0001-0051	1.391	10.556	0	38	128.401	5.847	0.962	14.686	1140	1.091	0.917	0.96	0.39228
47	NCS1_KAN708-1_4.tif:0002-0144	1.546	15.992	0	148	63.507	16.361	0.873	24.721	1919	1.24	0.806	0.92	0.660338
48	NCS1_KAN708-1_4.tif:0003-0169	1.585	10.488	0	139	111.218	19.166	0.948	16.618	1290	1.078	0.928	0.939	0.443896
49	NCS1_KAN708-1_4.tif:0004-0313	1.881	5.377	0	27	116.481	35.505	0.907	10.113	785	1.265	0.791	0.951	0.270123
50	NCS1_KAN708-1_4.tif:0005-0372	1.662	8.791	0	40	39.017	42.231	0.928	14.608	1134	1.088	0.919	0.935	0.390216
51	NCS1_KAN708-1_4.tif:0006-0440	1.469	18.325	0	134	8.033	50.019	1	26.911	2089	1.125	0.889	0.95	0.718836
52	NCS1_KAN708-1_4.tif:0007-0565	1.636	11.543	0	58	21.456	64.132	0.951	18.885	1466	1.032	0.969	0.951	0.504459
53	NCS1_KAN708-1_4.tif:0008-0648	1.507	26.376	0	82	52.193	73.556	0.912	39.755	3086	1.337	0.748	0.959	1.06191
54	NCS1_KAN708-1_4.tif:0009-0649	1.791	24.856	0	177	98.587	73.686	0.911	44.508	3455	1.43	0.699	0.946	1.18888
55	NCS1_KAN708-1_4.tif:0010-0713	1.456	44.389	0	409	130.761	80.983	0.964	64.617	5016	1.217	0.821	0.95	1.72603
56	NCS1_KAN708-1_4.tif:0011-0722	1.778	33.783	0	236	27.594	82.009	0.894	60.057	4662	1.544	0.648	0.926	1.60422
57	NCS1_KAN708-1_4.tif:0012-0908	1.456	21.938	0	152	117.376	103.069	0.892	31.935	2479	1.173	0.852	0.97	0.853038
58	NCS1_KAN708-1_4.tif:0013-0936	1.649	10.93	0	89	103.917	106.243	0.921	18.022	1399	1.436	0.696	0.938	0.481404
59	NCS1_KAN708-1_4.tif:0014-1005	1.675	38.962	0	228	57.195	114.112	0.935	65.249	5065	1.266	0.79	0.945	1.74289
60	NCS1_KAN708-1_4.tif:0015-1010	1.842	51.986	0	377	2.594	114.638	0.937	95.767	7434	1.175	0.851	0.941	2.55808
61	NCS1_KAN708-1_4.tif:0016-1094	2.01	52.737	0	472	105.676	124.136	0.889	105.982	8227	1.101	0.908	0.948	2.83096
62	NCS1_KAN708-1_4.tif:0017-1158	1.945	6.656	0	44	134.865	131.468	0.963	12.947	1005	1.009	0.991	0.953	0.345826
63	NCS1_KAN708-1_5.tif:0001-0131	2.138	50.265	0	529	105.642	14.878	0.75	107.49	8344	2.069	0.483	0.943	2.87122
64	NCS1_KAN708-1_5.tif:0002-0337	1.288	9.24	0	51	40.981	38.345	0.932	11.903	924	1.099	0.91	0.962	0.317953
65	NCS1_KAN708-1_5.tif:0003-0479	2.061	12.631	0	96	102.6	54.305	0.811	26.035	2021	1.698	0.589	0.896	0.695437
66	NCS1_KAN708-1_5.tif:0004-0494	2.048	6.013	0	32	60.017	56.076	0.919	12.315	956	1.174	0.852	0.935	0.328965
67	NCS1_KAN708-1_5.tif:0005-0784	1.752	6.86	0	49	63.042	88.951	0.926	12.019	933	1.268	0.789	0.954	0.32105
68	NCS1_KAN708-1_5.tif:0006-0817	1.533	7.756	0	51	124.696	92.703	0.832	11.89	923	1.546	0.647	0.898	0.317609
69	NCS1_KAN708-1_5.tif:0007-0899	1.301	8.535	0	41	29.08	102.081	0.912	11.105	862	1.371	0.73	0.971	0.296619
70	NCS1_KAN708-1_5.tif:0008-1040	1.894	45.898	0	372	74.033	118.043	0.837	86.917	6747	1.83	0.546	0.936	2.32168
71	NCS1_KAN708-1_5.tif:0009-1081	1.469	7.465	0	35	22.734	122.762	0.916	10.963	851	1.292	0.774	0.95	0.292834
72	NCS1_KAN708-1_6.tif:0001-0058	2.074	7.379	0	56	110.382	6.596	0.877	15.304	1188	1.563	0.64	0.931	0.408797
73	NCS1_KAN708-1_6.tif:0002-0284	1.804	3.464	0	17	114.197	32.271	0.927	6.248	485	1.116	0.896	0.959	0.166891
74	NCS1_KAN708-1_6.tif:0003-0292	1.842	38.392	0	374	33.677	33.171	0.787	70.724	5490	1.469	0.681	0.883	1.88914
75	NCS1_KAN708-1_6.tif:0004-0482	2.37	7.63	0	56	83.167	54.69	0.894	18.087	1404	1.326	0.754	0.925	0.483124
76	NCS1_KAN708-1_6.tif:0005-0818	1.726	14.754	0	119	65.491	92.862	0.912	25.468	1977	1.518	0.659	0.957	0.680297
77	NCS1_KAN708-1_6.tif:0006-0840	1.572	8.82	0	39	103.72	95.339	0.913	13.861	1076	1.219	0.821	0.946	0.370258
78	NCS1_KAN708-1_6.tif:0007-0879	1.842	44.979	0	348	34.92	99.783	0.844	82.859	6432	1.352	0.74	0.932	2.21329
79	NCS1_KAN708-1_6.tif:0008-1017	1.636	5.976	0	37	11.089	115.418	0.899	9.778	759	1.463	0.684	0.958	0.261176
80	NCS1_KAN708-1_6.tif:0009-1048	1.559	8.008	0	53	93.376	118.944	0.88	12.483	969	1.517	0.659	0.953	0.333438
81	NCS1_KAN708-1_6.tif:0010-1057	1.353	11.286	0	75	36.192	119.971	0.935	15.265	1185	1.225	0.817	0.946	0.407765
82	NCS1_KAN708-1_6.tif:0011-1090	1.378	8.972	0	91	140.34	123.774	0.953	12.367	960	1.198	0.835	0.96	0.330341
										2906.09				1
83	NCS1_KAN708-2_1.tif:0001-0007	1.34	24.933	0	81	53.516	0.785	0.939	33.404	2593	1.131	0.884	0.977	0.892266
84	NCS1_KAN708-2_1.tif:0002-0071	1.366	63.651	0	490	17.843	8.07	0.944	86.917	6747	1.227	0.815	0.942	2.32168
85	NCS1_KAN708-2_1.tif:0003-0223	1.765	100.664	0	597	91.731	25.377	0.861	177.659	13791	1.312	0.762	0.951	4.74556
86	NCS1_KAN708-2_1.tif:0004-0240	2.783	110.046	0	1708	21.184	27.31	0.774	306.211	23770	1.726	0.579	0.894	8.17939
87	NCS1_KAN708-2_1.tif:0005-0255	1.791	98.77	0	974	82.068	29.011	0.972	176.86	13729	1.064	0.94	0.959	4.72422
88	NCS1_KAN708-2_1.tif:0006-0283	2.164	62.893	0	689	138.85	32.084	0.893	136.114	10566	1.56	0.641	0.933	3.63582
89	NCS1_KAN708-2_1.tif:0007-0335	1.752	11.765	0	96	35.65	38.084	0.978	20.612	1600	1.149	0.87	0.954	0.550569
90	NCS1_KAN708-2_1.tif:0008-0442	1.997	36.755	0	358	53.631	50.199	0.905	73.39	5697	1.253	0.798	0.948	1.96037
91	NCS1_KAN708-2_1.tif:0009-0501	1.404	31.807	0	217	111.237	56.874	0.942	44.663	3467	1.183	0.846	0.96	1.19301
92	NCS1_KAN708-2_1.tif:0010-0524	1.919	73.416	0	690	9.491	59.546	0.926	140.919	10939	1.407	0.711	0.964	3.76417
93	NCS1_KAN708-2_1.tif:0011-0535	1.61	60.392	0	325	121.568	60.777	0.884	97.248	7549	1.189	0.841	0.954	2.59765
94	NCS1_KAN708-2_1.tif:0012-0562	1.971	97.837	0	1050	64.025	63.879	0.941	192.834	14969	1.277	0.783	0.953	5.15092
95	NCS1_KAN708-2_1.tif:0013-0581	1.378	18.542	0	145	7.717	65.996	0.859	25.558	1984	1.427	0.701	0.922	0.682705
96	NCS1_KAN708-2_1.tif:0014-0696	1.675	18.046	0	208	64.892	79.026	0.935	30.222	2346	1.21	0.827	0.942	0.807272
97	NCS1_KAN708-2_1.tif:0015-0710	1.585	11.715	0	69	29.043	80.578	0.921	18.563	1441	1.394	0.717	0.943	0.495856
98	NCS1_KAN708-2_1.tif:0016-0764	2.461	84.435	0	723	110.455	86.772	0.848	207.752	16127	1.356	0.738	0.918	5.54939
99	NCS1_KAN708-2_1.tif:0017-0915	2.023	10.223	0	54	31.653	103.935	0.894	20.676	1605	1.292	0.774	0.952	0.552289
100	NCS1_KAN708-2_1.tif:0018-0972	2.048	46.195	0	378	40.25	110.247	0.853	94.62	7345	1.445	0.692	0.93	2.52746
101	NCS1_KAN708-2_1.tif:0019-1066	1.958	7.184	0	38	109.254	120.984	0.959	14.067	1092	1.162	0.861	0.941	0.375763
102	NCS1_KAN708-2_1.tif:0020-1070	1.34	13.654	0	125	21.122	121.462	0.987	18.293	1420	1.202	0.832	0.95	0.48863
103	NCS1_KAN708-2_1.tif:0021-1154	1.507	5.761	0	27	53.458	131.023	0.94	8.683	674	1.14	0.877	0.947	0.231927
104	NCS1_KAN708-2_1.tif:0022-1213	1.546	17.108	0	86	119.179	137.68	0.925	26.447	2053	1.292	0.774	0.934	0.706449
105	NCS1_KAN708-2_2.tif:0001-0020	2.551	67.273	0	675	137.857	2.283	0.776	171.592	13320	1.616	0.619	0.87	4.58349
106	NCS1_KAN708-2_2.tif:0002-0130	2.538	34.777	0	494	133.814	14.709	0.822	88.256	6851	1.426	0.701	0.897	2.35747
107	NCS1_KAN708-2_2.tif:0003-0196	1.855	74.326	0	388	104.385	22.223	0.895	137.879	10703	1.295	0.772	0.941	3.68296
108	NCS1_KAN708-2_2.tif:0004-0285	1.907	87.804	0	861	95.844	32.442	0.92	167.405	12995	1.419	0.705	0.961	4.47165
109	NCS1_KAN708-2_2.tif:0005-0337	1.932	96.58	0	842	63.525	38.305	0.908	186.625	14487	1.144	0.874	0.955	4.98506
110	NCS1_KAN708-2_2.tif:0006-0424	2.744	62.343	0	742	97.386	48.203	0.835	171.063	13279	1.195	0.837	0.912	4.56938
111	NCS1_KAN708-2_2.tif:0007-0431	2.924	9.022	0	61	1.033	48.887	0.755	26.383	2048	2.005	0.499	0.906	0.704728
112	NCS1_KAN708-2_2.tif:0008-0436	1.919	61.456	0	271	134.821	49.601	0.926	117.963	9157	1.076	0.929	0.961	3.15097
113	NCS1_KAN708-2_2.tif:0009-0494	1.572	13.254	0	172	13.621	56.156	0.924	20.831	1617	1.291	0.775	0.972	0.556419
114	NCS1_KAN708-2_2.tif:0010-0537	2.164	38.524	0	438	49.793	61.058	0.787	83.374	6472	1.207	0.829	0.88	2.22705
115	NCS1_KAN708-2_2.tif:0011-0566	2.203	80.965	0	975	76.56	64.338	0.887	178.355	13845	1.072	0.933	0.937	4.76414
116	NCS1_KAN708-2_2.tif:0012-0570	1.688	73.939	0	689	113.16	64.657	0.927	124.777	9686	1.08	0.925	0.967	3.33301
117	NCS1_KAN708-2_2.tif:0013-0619	1.597	20.169	0	103	24.971	70.272	0.955	32.219	2501	1.103	0.906	0.947	0.860608
118	NCS1_KAN708-2_2.tif:0014-0726	2.035	52.291	0	443	26.78	82.502	0.923	106.433	8262	1.164	0.859	0.955	2.843
119	NCS1_KAN708-2_2.tif:0015-0809	2.576	70.41	0	855	86.129	91.774	0.791	181.408	14082	1.524	0.656	0.905	4.84569
120	NCS1_KAN708-2_2.tif:0016-0835	2.873	31.242	0	380	3.598	94.74	0.815	89.751	6967	1.305	0.766	0.908	2.39738
121	NCS1_KAN708-2_2.tif:0017-0876	1.997	38.368	0	302	68.711	99.5	0.84	76.611	5947	1.169	0.855	0.928	2.0464
122	NCS1_KAN708-2_2.tif:0018-0913	2.19	49.735	0	436	104.167	103.643	0.861	108.919	8455	1.309	0.764	0.919	2.90941
123	NCS1_KAN708-2_2.tif:0019-0981	1.662	21.806	0	228	115.361	111.372	0.939	36.238	2813	1.161	0.861	0.963	0.967969
124	NCS1_KAN708-2_2.tif:0020-1127	1.997	62.271	0	414	80.313	127.916	0.801	124.339	9652	1.633	0.613	0.939	3.32131
125	NCS1_KAN708-2_2.tif:0021-1186	1.726	52.254	0	313	33.745	134.7	0.833	90.202	7002	1.44	0.694	0.908	2.40943
126	NCS1_KAN708-2_3.tif:0001-0047	2.138	118.536	0	1004	35.407	5.325	0.841	253.484	19677	1.646	0.608	0.922	6.77096
127	NCS1_KAN708-2_3.tif:0002-0218	1.559	18.752	0	90	66.087	24.821	0.96	29.23	2269	1.327	0.753	0.949	0.780775
128	NCS1_KAN708-2_3.tif:0003-0265	2.151	52.569	0	358	120.652	30.043	0.846	113.093	8779	1.532	0.653	0.915	3.0209
129	NCS1_KAN708-2_3.tif:0004-0316	1.662	52.62	0	170	104.501	35.93	0.939	87.445	6788	1.199	0.834	0.959	2.33579
130	NCS1_KAN708-2_3.tif:0005-0349	1.34	56.779	0	165	33.985	39.585	0.871	76.07	5905	1.338	0.747	0.941	2.03194
131	NCS1_KAN708-2_3.tif:0006-0369	1.945	68.954	0	537	59.849	41.891	0.914	134.13	10412	1.229	0.814	0.965	3.58283
132	NCS1_KAN708-2_3.tif:0007-0605	2.164	99.31	0	826	102.099	68.701	0.893	214.927	16684	1.376	0.727	0.931	5.74106
133	NCS1_KAN708-2_3.tif:0008-0668	2.113	76.463	0	719	116.503	75.869	0.82	161.543	12540	1.625	0.615	0.943	4.31508
134	NCS1_KAN708-2_3.tif:0009-0760	1.649	14.242	0	148	36.676	86.309	0.871	23.484	1823	1.224	0.817	0.924	0.627304
135	NCS1_KAN708-2_3.tif:0010-0966	2.229	64.642	0	761	23.033	109.643	0.829	144.062	11183	1.494	0.669	0.908	3.84813
136	NCS1_KAN708-2_3.tif:0011-1017	2.113	14.415	0	66	36.861	115.501	0.948	30.454	2364	1.161	0.861	0.94	0.813465
137	NCS1_KAN708-2_3.tif:0012-1203	1.752	8.757	0	30	113.638	136.529	0.926	15.343	1191	1.137	0.88	0.944	0.40983
138	NCS1_KAN708-2_3.tif:0013-1252	1.597	78.565	0	581	10.078	142.141	0.955	125.499	9742	1.08	0.926	0.95	3.35228
139	NCS1_KAN708-2_4.tif:0001-0039	1.314	7.284	0	38	68.23	4.514	0.95	9.572	743	1.085	0.922	0.967	0.25567
140	NCS1_KAN708-2_4.tif:0002-0078	1.507	9.59	0	67	69.422	8.846	0.968	14.454	1122	1.113	0.899	0.951	0.386086
141	NCS1_KAN708-2_4.tif:0003-0117	2.486	12.886	0	56	119.997	13.32	0.925	32.038	2487	1.325	0.755	0.953	0.85579
142	NCS1_KAN708-2_4.tif:0004-0180	2.074	78.273	0	430	101.252	20.447	0.94	162.342	12602	1.242	0.805	0.961	4.33642
143	NCS1_KAN708-2_4.tif:0005-0181	1.7	73.333	0	444	69.072	20.545	0.949	124.7	9680	1.156	0.865	0.94	3.33094
144	NCS1_KAN708-2_4.tif:0006-0253	1.855	74.875	0	497	113.026	28.775	0.895	138.896	10782	1.382	0.724	0.947	3.71015
145	NCS1_KAN708-2_4.tif:0007-0254	1.649	14.062	0	137	131.973	28.882	0.906	23.188	1800	1.285	0.778	0.955	0.61939
146	NCS1_KAN708-2_4.tif:0008-0310	1.585	35.195	0	142	52.234	35.245	0.959	55.767	4329	1.08	0.926	0.972	1.48963
147	NCS1_KAN708-2_4.tif:0009-0445	1.855	52.799	0	257	80.9	50.505	0.943	97.944	7603	1.175	0.851	0.944	2.61623
148	NCS1_KAN708-2_4.tif:0010-0576	1.533	87.689	0	550	131.019	65.381	0.928	134.426	10435	1.307	0.765	0.96	3.59074
149	NCS1_KAN708-2_4.tif:0011-0605	1.778	103.181	0	806	97.988	68.773	0.88	183.43	14239	1.331	0.751	0.932	4.89972
150	NCS1_KAN708-2_4.tif:0012-0617	1.829	62.472	0	471	42.856	70.093	0.93	114.278	8871	1.092	0.916	0.931	3.05256
151	NCS1_KAN708-2_4.tif:0013-0930	1.688	58.649	0	445	40.61	105.571	0.969	98.974	7683	1.105	0.905	0.936	2.64376
152	NCS1_KAN708-2_4.tif:0014-1011	1.739	71.015	0	540	22.19	114.823	0.871	123.502	9587	1.08	0.926	0.931	3.29894
153	NCS1_KAN708-2_4.tif:0015-1026	1.778	10.696	0	84	86.833	116.475	0.88	19.014	1476	1.457	0.686	0.936	0.5079
154	NCS1_KAN708-2_4.tif:0016-1048	1.301	14.267	0	75	25.131	118.954	0.941	18.563	1441	1.136	0.881	0.957	0.495856
155	NCS1_KAN708-2_5.tif:0001-0021	3.208	62.145	0	740	95.732	2.497	0.664	199.34	15474	2.645	0.378	0.905	5.32469
156	NCS1_KAN708-2_5.tif:0002-0050	1.752	31.162	0	293	64.381	5.728	0.926	54.595	4238	1.148	0.871	0.948	1.45832
157	NCS1_KAN708-2_5.tif:0003-0081	1.958	7.816	0	38	41.205	9.186	0.924	15.304	1188	1.32	0.758	0.933	0.408797
158	NCS1_KAN708-2_5.tif:0004-0161	1.688	49.038	0	243	116.023	18.356	0.892	82.756	6424	1.36	0.735	0.939	2.21053
159	NCS1_KAN708-2_5.tif:0005-0191	2.448	50.795	0	555	133.051	21.683	0.745	124.327	9651	1.788	0.559	0.87	3.32096
160	NCS1_KAN708-2_5.tif:0006-0341	2.023	56.42	0	273	6.599	38.732	0.864	114.111	8858	1.241	0.806	0.91	3.04809
161	NCS1_KAN708-2_5.tif:0007-0350	2.409	16.61	0	89	50.916	39.776	0.896	40.012	3106	1.408	0.71	0.944	1.06879
162	NCS1_KAN708-2_5.tif:0008-0436	2.074	62.882	0	602	101.922	49.529	0.873	130.42	10124	1.434	0.697	0.964	3.48372
163	NCS1_KAN708-2_5.tif:0009-0452	1.984	9.364	0	104	137.614	51.313	0.972	18.576	1442	1.254	0.798	0.951	0.4962
164	NCS1_KAN708-2_5.tif:0010-0491	2.164	56.06	0	376	67.428	55.71	0.872	121.325	9418	1.555	0.643	0.946	3.24079
165	NCS1_KAN708-2_5.tif:0011-0543	2.138	30.446	0	195	133.704	61.65	0.882	65.107	5054	1.498	0.667	0.935	1.73911
166	NCS1_KAN708-2_5.tif:0012-0559	1.327	40.544	0	241	42.226	63.489	0.96	53.796	4176	1.104	0.905	0.972	1.43698
167	NCS1_KAN708-2_5.tif:0013-0573	2.113	54.409	0	386	109.66	65.102	0.911	114.948	8923	1.451	0.689	0.976	3.07045
168	NCS1_KAN708-2_5.tif:0014-0652	2.074	49.938	0	214	13.25	74.046	0.908	103.573	8040	1.206	0.829	0.936	2.76661
169	NCS1_KAN708-2_5.tif:0015-0696	1.881	66.897	0	396	123.059	79.015	0.875	125.821	9767	1.417	0.706	0.927	3.36088
170	NCS1_KAN708-2_5.tif:0016-0754	2.28	100.164	0	872	89.409	85.631	0.876	228.389	17729	1.493	0.67	0.947	6.10065
171	NCS1_KAN708-2_5.tif:0017-0782	2.254	32.937	0	288	28.107	88.743	0.887	74.253	5764	1.416	0.706	0.946	1.98342
172	NCS1_KAN708-2_5.tif:0018-0861	1.855	23.521	0	147	41.729	97.72	0.933	43.632	3387	1.249	0.801	0.923	1.16549
173	NCS1_KAN708-2_5.tif:0019-0950	1.688	93.359	0	658	127.829	107.924	0.892	157.55	12230	1.392	0.718	0.96	4.20841
174	NCS1_KAN708-2_5.tif:0020-1011	1.572	52.164	0	283	128.12	114.79	0.853	81.983	6364	1.494	0.67	0.897	2.18989
175	NCS1_KAN708-2_5.tif:0021-1039	1.752	52.037	0	353	16.009	117.921	0.713	91.168	7077	2.358	0.424	0.907	2.43523
176	NCS1_KAN708-2_5.tif:0022-1075	1.301	102.436	0	438	77.52	122.063	0.941	133.28	10346	1.116	0.896	0.962	3.56012
177	NCS1_KAN708-2_5.tif:0023-1266	1.907	37.682	0	385	84.124	143.7	0.733	71.844	5577	1.983	0.504	0.886	1.91908
178	NCS1_KAN708-2_6.tif:0001-0174	2.1	67.865	0	426	20.15	19.811	0.875	142.503	11062	1.368	0.731	0.931	3.8065
179	NCS1_KAN708-2_6.tif:0002-0206	2.061	25.094	0	115	97.179	23.362	0.948	51.722	4015	1.319	0.758	0.947	1.38158
180	NCS1_KAN708-2_6.tif:0003-0319	2.074	60.329	0	367	136.591	36.239	0.886	125.125	9713	1.351	0.74	0.944	3.3423
181	NCS1_KAN708-2_6.tif:0004-0341	2.435	9.032	0	44	88.673	38.744	0.939	21.99	1707	1.286	0.778	0.936	0.587388
182	NCS1_KAN708-2_6.tif:0005-0434	1.791	48.683	0	279	116.224	49.326	0.921	87.174	6767	1.257	0.796	0.955	2.32856
183	NCS1_KAN708-2_6.tif:0006-0484	2.1	20.577	0	129	66.657	54.92	0.887	43.207	3354	1.346	0.743	0.918	1.15413
184	NCS1_KAN708-2_6.tif:0007-0530	2.113	76.22	0	487	8.854	60.147	0.902	161.028	12500	1.396	0.716	0.956	4.30132
185	NCS1_KAN708-2_6.tif:0008-0551	2.319	43.278	0	408	121.818	62.633	0.891	100.353	7790	1.296	0.772	0.945	2.68058
186	NCS1_KAN708-2_6.tif:0009-0653	1.636	47.598	0	247	26.808	74.196	0.864	77.873	6045	1.339	0.747	0.927	2.08012
187	NCS1_KAN708-2_6.tif:0010-0711	1.327	40.214	0	172	65.508	80.69	0.947	53.358	4142	1.363	0.734	0.941	1.42529
188	NCS1_KAN708-2_6.tif:0011-0823	1.907	61.791	0	457	133.443	93.4	0.822	117.808	9145	1.869	0.535	0.94	3.14684
189	NCS1_KAN708-2_6.tif:0012-0909	1.597	13.016	0	122	31.566	103.18	0.928	20.792	1614	1.085	0.922	0.943	0.555386
190	NCS1_KAN708-2_6.tif:0013-0962	2.087	51.111	0	309	66.959	109.197	0.802	106.665	8280	1.586	0.63	0.903	2.84919
191	NCS1_KAN708-2_6.tif:0014-1163	1.778	40.572	0	304	78.257	132.112	0.786	72.128	5599	1.648	0.607	0.887	1.92665
										7449.28				2.56334
192	NCS1_KAN708-3_1.tif:0001-0065	1.456	80.097	0	283	97.432	7.434	0.947	116.597	9051	1.123	0.891	0.974	3.1145
193	NCS1_KAN708-3_1.tif:0002-0125	2.203	35.146	0	191	25.398	14.228	0.918	77.422	6010	1.404	0.712	0.958	2.06807
194	NCS1_KAN708-3_1.tif:0003-0180	1.559	63.182	0	265	10.586	20.442	0.917	98.485	7645	1.155	0.866	0.964	2.63069
195	NCS1_KAN708-3_1.tif:0004-0212	1.456	9.345	0	42	141.979	24.097	0.935	13.604	1056	1.245	0.803	0.954	0.363375
196	NCS1_KAN708-3_1.tif:0005-0234	1.443	13.598	0	75	140.204	26.622	0.927	19.62	1523	1.219	0.82	0.941	0.524073
197	NCS1_KAN708-3_1.tif:0006-0241	1.533	101.345	0	451	67.318	27.44	0.928	155.36	12060	1.325	0.755	0.964	4.14991
198	NCS1_KAN708-3_1.tif:0007-0270	1.636	26.307	0	132	46.855	30.621	0.951	43.04	3341	1.012	0.988	0.955	1.14966
199	NCS1_KAN708-3_1.tif:0008-0297	1.481	62.348	0	237	92.292	33.783	0.981	92.366	7170	1.082	0.924	0.947	2.46724
200	NCS1_KAN708-3_1.tif:0009-0321	1.688	34.87	0	110	114.025	36.456	0.953	58.846	4568	1.192	0.839	0.97	1.57187
201	NCS1_KAN708-3_1.tif:0010-0432	1.417	45.782	0	180	78.5	49.098	0.95	64.875	5036	1.134	0.882	0.965	1.73292
202	NCS1_KAN708-3_1.tif:0011-0483	1.546	27.258	0	212	25.208	54.85	0.898	42.138	3271	1.269	0.788	0.923	1.12557
203	NCS1_KAN708-3_1.tif:0012-0576	1.984	171.942	0	1086	105.276	65.433	0.932	341.109	26479	1.152	0.868	0.966	9.11157
204	NCS1_KAN708-3_1.tif:0013-0585	1.288	12.98	0	54	71.301	66.443	0.962	16.721	1298	1.08	0.926	0.962	0.446649
205	NCS1_KAN708-3_1.tif:0014-0610	1.353	48.876	0	123	141.097	69.258	0.935	66.112	5132	1.229	0.814	0.95	1.76595
206	NCS1_KAN708-3_1.tif:0015-0705	1.958	74.375	0	332	120.243	80.008	0.888	145.634	11305	1.334	0.75	0.93	3.89011
207	NCS1_KAN708-3_1.tif:0016-0830	1.636	33.874	0	105	133.838	94.239	0.924	55.419	4302	1.088	0.919	0.958	1.48034
208	NCS1_KAN708-3_1.tif:0017-0838	1.675	12.638	0	73	111.761	95.127	0.759	21.166	1643	1.817	0.55	0.864	0.565365
209	NCS1_KAN708-3_1.tif:0018-0852	1.778	99.478	0	449	51.887	96.718	0.965	176.848	13728	1.157	0.865	0.965	4.72388
210	NCS1_KAN708-3_1.tif:0019-0938	2.486	108.145	0	1110	114.408	106.499	0.86	268.878	20872	1.703	0.587	0.93	7.18217
211	NCS1_KAN708-3_1.tif:0020-1076	1.649	212.133	0	1151	100.86	122.194	0.986	349.792	27153	1.192	0.839	0.962	9.3435
212	NCS1_KAN708-3_1.tif:0021-1152	1.919	96.624	0	573	139.35	130.852	0.902	185.466	14397	1.254	0.798	0.955	4.95409
213	NCS1_KAN708-3_1.tif:0022-1169	1.971	52.908	0	376	101.83	132.662	0.926	104.282	8095	1.19	0.841	0.962	2.78553
214	NCS1_KAN708-3_1.tif:0023-1219	1.778	125.819	0	768	3.296	138.421	0.939	223.675	17363	1.303	0.768	0.958	5.9747
215	NCS1_KAN708-3_1.tif:0024-1221	1.894	99.687	0	954	67.229	138.664	0.938	188.777	14654	1.016	0.984	0.945	5.04252
216	NCS1_KAN708-3_1.tif:0025-1241	1.314	11.676	0	53	92.995	140.858	0.819	15.343	1191	1.855	0.539	0.927	0.40983
217	NCS1_KAN708-3_2.tif:0001-0011	1.366	58.396	0	167	83.877	1.305	0.957	79.741	6190	1.099	0.91	0.981	2.13001
218	NCS1_KAN708-3_2.tif:0002-0046	2.113	104.665	0	762	7.666	5.287	0.902	221.124	17165	1.279	0.782	0.94	5.90657
219	NCS1_KAN708-3_2.tif:0003-0085	1.572	127.434	0	962	131.628	9.652	0.968	200.28	15547	1.013	0.987	0.942	5.34981
220	NCS1_KAN708-3_2.tif:0004-0126	1.881	125.87	0	762	62.26	14.292	0.942	236.737	18377	1.133	0.883	0.973	6.32363
221	NCS1_KAN708-3_2.tif:0005-0191	2.216	134.698	0	1134	36.52	21.646	0.901	298.456	23168	1.35	0.741	0.961	7.97224
222	NCS1_KAN708-3_2.tif:0006-0224	2.023	137.389	0	876	132.519	25.477	0.941	277.87	21570	1.142	0.875	0.952	7.42236
223	NCS1_KAN708-3_2.tif:0007-0233	2.473	78.042	0	673	2.356	26.399	0.891	193.028	14984	1.083	0.924	0.93	5.15608
224	NCS1_KAN708-3_2.tif:0008-0252	2.589	84.781	0	817	100.221	28.638	0.829	219.526	17041	1.61	0.621	0.924	5.8639
225	NCS1_KAN708-3_2.tif:0009-0372	2.164	95.214	0	831	73.151	42.293	0.924	206.065	15996	1.267	0.79	0.949	5.50431
226	NCS1_KAN708-3_2.tif:0010-0383	1.984	138.312	0	882	20.186	43.532	0.923	274.392	21300	1.148	0.871	0.939	7.32945
227	NCS1_KAN708-3_2.tif:0011-0466	1.791	87.065	0	614	4.704	52.863	0.921	155.901	12102	1.164	0.859	0.959	4.16436
228	NCS1_KAN708-3_2.tif:0012-0475	2.512	36.523	0	311	29.716	53.898	0.839	91.747	7122	1.711	0.584	0.931	2.45072
229	NCS1_KAN708-3_2.tif:0013-0576	1.7	134.492	0	838	59.873	65.42	0.934	228.699	17753	1.217	0.822	0.967	6.10891
230	NCS1_KAN708-3_2.tif:0014-0699	1.997	86.865	0	782	120.917	79.339	0.953	173.447	13464	1.081	0.925	0.942	4.63304
231	NCS1_KAN708-3_2.tif:0015-0820	2.486	62.762	0	736	57.498	93.067	0.789	156.043	12113	1.835	0.545	0.9	4.16815
232	NCS1_KAN708-3_2.tif:0016-0912	1.43	11.27	0	55	37.796	103.469	0.918	16.116	1251	1.095	0.913	0.933	0.430476
233	NCS1_KAN708-3_2.tif:0017-0920	2.1	113.141	0	922	14.993	104.512	0.854	237.574	18442	1.606	0.623	0.948	6.34599
234	NCS1_KAN708-3_2.tif:0018-0949	1.907	105.662	0	955	98.041	107.8	0.874	201.453	15638	1.037	0.964	0.949	5.38112
235	NCS1_KAN708-3_2.tif:0019-1040	1.391	29.074	0	238	128.981	118.083	0.962	40.45	3140	1.06	0.944	0.952	1.08049
236	NCS1_KAN708-3_2.tif:0020-1053	1.791	144.309	0	1061	104.418	119.581	0.921	258.405	20059	1.211	0.826	0.955	6.90241
237	NCS1_KAN708-3_2.tif:0021-1100	2.229	104.393	0	719	105.381	124.888	0.868	232.653	18060	1.542	0.648	0.928	6.21455
238	NCS1_KAN708-3_3.tif:0001-0032	1.494	18.397	0	78	105.862	3.642	0.905	27.491	2134	1.075	0.931	0.943	0.734321
239	NCS1_KAN708-3_3.tif:0002-0054	1.7	91.356	0	265	142.656	6.242	0.923	155.347	12059	1.204	0.831	0.936	4.14957
240	NCS1_KAN708-3_3.tif:0003-0176	1.765	101.759	0	380	62.119	19.982	0.884	179.591	13941	1.356	0.737	0.955	4.79717
241	NCS1_KAN708-3_3.tif:0004-0198	1.597	91.315	0	258	115.369	22.517	0.984	145.866	11323	1.245	0.803	0.954	3.89631
242	NCS1_KAN708-3_3.tif:0005-0235	1.804	158.464	0	820	27.034	26.705	0.953	285.793	22185	1.097	0.912	0.962	7.63398
243	NCS1_KAN708-3_3.tif:0006-0326	2.254	60.554	0	544	32.299	37.003	0.744	136.513	10597	1.918	0.522	0.895	3.64649
244	NCS1_KAN708-3_3.tif:0007-0372	1.456	32.336	0	178	1.534	42.289	0.976	47.072	3654	1.122	0.891	0.974	1.25736
245	NCS1_KAN708-3_3.tif:0008-0416	1.636	29.803	0	185	123.578	47.252	0.979	48.759	3785	1.174	0.852	0.962	1.30244
246	NCS1_KAN708-3_3.tif:0009-0581	2.615	24.571	0	151	110.42	65.928	0.829	64.257	4988	1.56	0.641	0.904	1.7164
247	NCS1_KAN708-3_3.tif:0010-0610	1.52	104.373	0	342	89.274	69.255	0.92	158.658	12316	1.192	0.839	0.952	4.238
248	NCS1_KAN708-3_3.tif:0011-0720	1.945	134.55	0	1282	29.306	81.762	0.928	261.729	20317	1.222	0.818	0.944	6.99119
249	NCS1_KAN708-3_3.tif:0012-0767	2.203	80.006	0	1016	46.238	87.086	0.838	176.242	13681	1.609	0.622	0.922	4.70771
250	NCS1_KAN708-3_3.tif:0013-0848	1.623	15.865	0	152	84.687	96.28	0.971	25.752	1999	1.026	0.975	0.944	0.687867
251	NCS1_KAN708-3_3.tif:0014-0897	1.301	24.099	0	118	16.346	101.882	0.941	31.355	2434	1.115	0.897	0.962	0.837553
252	NCS1_KAN708-3_3.tif:0015-0927	2.023	111.783	0	848	124.929	105.221	0.965	226.084	17550	1.315	0.76	0.96	6.03905
253	NCS1_KAN708-3_3.tif:0016-1224	1.623	119.444	0	969	39.409	138.905	0.791	193.878	15050	1.672	0.598	0.923	5.17879
254	NCS1_KAN708-3_3.tif:0017-1229	2.332	25.878	0	177	143.608	139.508	0.84	60.34	4684	1.532	0.653	0.914	1.61179
255	NCS1_KAN708-3_4.tif:0001-0047	2.229	98.214	0	404	40.674	5.378	0.865	218.882	16991	1.291	0.774	0.951	5.8467
256	NCS1_KAN708-3_4.tif:0002-0094	1.907	151.419	0	824	23.604	10.644	0.944	288.691	22410	1.213	0.824	0.958	7.7114
257	NCS1_KAN708-3_4.tif:0003-0113	1.971	131.641	0	1132	117.325	12.959	0.894	259.461	20141	1.31	0.763	0.939	6.93063
258	NCS1_KAN708-3_4.tif:0004-0174	3.092	168.954	0	1403	143.014	19.828	0.805	522.362	40549	1.858	0.538	0.934	13.9531
259	NCS1_KAN708-3_4.tif:0005-0194	1.816	98.752	0	772	90.152	22.054	0.909	179.372	13924	1.223	0.817	0.962	4.79133
260	NCS1_KAN708-3_4.tif:0006-0201	2.01	106.487	0	874	77.57	22.814	0.879	214	16612	1.215	0.823	0.92	5.71628
261	NCS1_KAN708-3_4.tif:0007-0254	1.494	28.259	0	104	40.468	28.882	0.943	42.228	3278	1.105	0.905	0.983	1.12798
262	NCS1_KAN708-3_4.tif:0008-0364	1.804	47.336	0	132	114.419	41.383	0.953	85.371	6627	1.207	0.829	0.966	2.28039
263	NCS1_KAN708-3_4.tif:0009-0393	1.958	18.105	0	73	38.189	44.61	0.985	35.452	2752	1.073	0.932	0.944	0.946978
264	NCS1_KAN708-3_4.tif:0010-0458	2.023	161.287	0	1709	76.552	52.111	0.894	326.204	25322	1.333	0.75	0.957	8.71344
265	NCS1_KAN708-3_4.tif:0011-0496	1.469	126.395	0	644	118.223	56.357	0.955	185.62	14409	1.02	0.981	0.974	4.95822
266	NCS1_KAN708-3_4.tif:0012-0527	1.456	8.027	0	39	97.307	59.885	0.964	11.684	907	1.089	0.918	0.95	0.312104
267	NCS1_KAN708-3_4.tif:0013-0588	1.726	150.246	0	947	39.468	66.708	0.912	259.358	20133	1.096	0.913	0.944	6.92788
268	NCS1_KAN708-3_4.tif:0014-0621	1.765	143.898	0	864	141.479	70.511	0.932	253.961	19714	1.088	0.919	0.955	6.7837
269	NCS1_KAN708-3_4.tif:0015-0680	2.01	158.66	0	993	83.075	77.248	0.959	318.849	24751	1.056	0.947	0.951	8.51696
270	NCS1_KAN708-3_4.tif:0016-0697	1.816	88.071	0	763	95.097	79.178	0.863	159.972	12418	1.514	0.66	0.969	4.2731
271	NCS1_KAN708-3_4.tif:0017-0757	2.01	118.282	0	1046	125.324	85.979	0.902	237.703	18452	1.209	0.827	0.923	6.34943
272	NCS1_KAN708-3_4.tif:0018-0767	1.688	177.832	0	1058	21.85	87.087	0.927	300.105	23296	1.192	0.839	0.963	8.01628
273	NCS1_KAN708-3_4.tif:0019-0858	1.971	148.817	0	911	61.527	97.417	0.917	293.316	22769	1.43	0.699	0.956	7.83494
274	NCS1_KAN708-3_4.tif:0020-0862	1.688	153.885	0	819	112.107	97.893	0.927	259.693	20159	1.212	0.825	0.967	6.93682
275	NCS1_KAN708-3_4.tif:0021-1212	1.726	109.672	0	686	30.22	137.643	0.912	189.318	14696	1.198	0.835	0.947	5.05697
276	NCS1_KAN708-3_6.tif:0001-0074	2.1	86.804	0	516	111.608	8.474	0.928	182.271	14149	1.117	0.895	0.956	4.86875
277	NCS1_KAN708-3_6.tif:0002-0277	1.829	16.683	0	100	81.919	31.402	0.93	30.518	2369	1.163	0.86	0.94	0.815186
278	NCS1_KAN708-3_6.tif:0003-0336	1.984	87.175	0	864	134.378	38.185	0.923	172.944	13425	1.278	0.782	0.942	4.61962
279	NCS1_KAN708-3_6.tif:0004-0432	2.113	101.061	0	647	47.888	49.071	0.934	213.51	16574	1.152	0.868	0.962	5.7032
280	NCS1_KAN708-3_6.tif:0005-0469	2.409	156.765	0	1196	93.639	53.228	0.896	377.643	29315	1.33	0.752	0.942	10.0875
281	NCS1_KAN708-3_6.tif:0006-0489	2.061	121.844	0	1115	124.05	55.577	0.859	251.14	19495	1.23	0.813	0.922	6.70834
282	NCS1_KAN708-3_6.tif:0007-0714	1.713	60.504	0	550	89.656	81.097	0.93	103.663	8047	1.091	0.916	0.937	2.76902
283	NCS1_KAN708-3_6.tif:0008-0723	1.932	116.96	0	706	38.416	82.138	0.957	226.006	17544	1.071	0.934	0.955	6.03699
284	NCS1_KAN708-3_6.tif:0009-0878	2.035	105.076	0	848	1.662	99.677	0.828	213.871	16602	1.062	0.942	0.9	5.71284
285	NCS1_KAN708-3_6.tif:0010-0976	1.765	19.737	0	166	54.282	110.832	0.932	34.834	2704	1.091	0.916	0.951	0.930461
286	NCS1_KAN708-3_6.tif:0011-1028	1.456	9.451	0	49	18.763	116.708	0.935	13.758	1068	1.334	0.75	0.942	0.367505
287	NCS1_KAN708-3_6.tif:0012-1088	1.894	12.49	0	126	79.024	123.591	0.881	23.652	1836	1.544	0.648	0.936	0.631778
										12655.8				4.35494
288	NCS1_KAN708-4_1.tif:0001-0035	1.971	24.503	0	222	136.901	3.954	0.965	48.296	3749	1.085	0.922	0.944	1.29005
289	NCS1_KAN708-4_1.tif:0002-0135	2.138	124.777	0	1346	95.332	15.379	0.913	266.83	20713	1.195	0.837	0.946	7.12746
290	NCS1_KAN708-4_1.tif:0003-0372	1.481	78.13	0	292	39.525	42.285	0.952	115.747	8985	1.121	0.892	0.947	3.09179
291	NCS1_KAN708-4_1.tif:0004-0397	1.842	17.413	0	106	74.013	45.088	0.947	32.077	2490	1.116	0.896	0.969	0.856823
292	NCS1_KAN708-4_1.tif:0005-0475	2.19	16.724	0	86	48.712	53.904	0.842	36.624	2843	1.299	0.77	0.916	0.978292
293	NCS1_KAN708-4_1.tif:0006-0479	1.997	33.619	0	161	133.148	54.412	0.905	67.129	5211	1.543	0.648	0.963	1.79313
294	NCS1_KAN708-4_1.tif:0007-0487	2.087	73.512	0	809	38.683	55.257	0.927	153.415	11909	1.208	0.828	0.918	4.09795
295	NCS1_KAN708-4_1.tif:0008-0613	2.138	96.584	0	883	75.633	69.615	0.959	206.541	16033	1.241	0.806	0.951	5.51704
296	NCS1_KAN708-4_1.tif:0009-0627	1.752	76.787	0	403	28.591	71.247	0.951	134.529	10443	1.106	0.904	0.948	3.59349
297	NCS1_KAN708-4_1.tif:0010-0714	1.945	46.755	0	508	110.106	81.052	0.963	90.949	7060	1.192	0.839	0.965	2.42938
298	NCS1_KAN708-4_1.tif:0011-0762	1.688	5.099	0	42	66.176	86.431	0.677	8.605	668	2.572	0.389	0.949	0.229862
299	NCS1_KAN708-4_1.tif:0012-0872	2.293	127.669	0	1446	66.107	98.996	0.893	292.749	22725	1.422	0.703	0.932	7.8198
300	NCS1_KAN708-4_1.tif:0013-0893	1.494	73.138	0	272	127.801	101.346	0.916	109.293	8484	1.208	0.828	0.983	2.91939
301	NCS1_KAN708-4_1.tif:0014-0958	1.52	15.678	0	64	89.174	108.741	0.883	23.832	1850	1.312	0.762	0.918	0.636595
302	NCS1_KAN708-4_1.tif:0015-0976	1.829	107.324	0	916	110.96	110.852	0.916	196.326	15240	1.295	0.772	0.969	5.24417
303	NCS1_KAN708-4_1.tif:0016-1055	1.842	65.035	0	659	14.513	119.792	0.937	119.805	9300	1.054	0.949	0.947	3.20018
304	NCS1_KAN708-4_1.tif:0017-1137	1.675	8.677	0	61	39.354	129.091	0.99	14.531	1128	1.093	0.915	0.942	0.388151
305	NCS1_KAN708-4_1.tif:0018-1153	1.816	69.099	0	404	143.365	130.863	0.899	125.512	9743	1.317	0.76	0.943	3.35262
306	NCS1_KAN708-4_1.tif:0019-1203	1.675	119.885	0	665	58.873	136.608	0.92	200.77	15585	1.243	0.804	0.959	5.36288
307	NCS1_KAN708-4_2.tif:0001-0031	1.623	103.135	0	592	66.822	3.568	0.867	167.405	12995	1.457	0.686	0.958	4.47165
308	NCS1_KAN708-4_2.tif:0002-0180	3.568	35.498	0	207	111.513	20.448	0.76	126.671	9833	1.607	0.622	0.875	3.38359
309	NCS1_KAN708-4_2.tif:0003-0183	2.242	98.626	0	1215	124.039	20.798	0.861	221.072	17161	1.212	0.825	0.921	5.90519
310	NCS1_KAN708-4_2.tif:0004-0189	2.087	19.741	0	212	39.924	21.473	0.936	41.197	3198	1.198	0.835	0.942	1.10045
311	NCS1_KAN708-4_2.tif:0005-0303	2.061	80.925	0	413	107.719	34.434	0.984	166.799	12948	1.178	0.849	0.964	4.45548
312	NCS1_KAN708-4_2.tif:0006-0337	2.267	146.869	0	1492	72.42	38.193	0.892	332.993	25849	1.517	0.659	0.957	8.89478
313	NCS1_KAN708-4_2.tif:0007-0413	1.507	114.376	0	722	19.822	46.862	0.94	172.39	13382	1.107	0.904	0.955	4.60482
314	NCS1_KAN708-4_2.tif:0008-0489	1.752	84.066	0	598	47.028	55.524	0.926	147.283	11433	1.095	0.914	0.951	3.93416
315	NCS1_KAN708-4_2.tif:0009-0489	1.842	107.832	0	774	65.951	55.526	0.898	198.644	15420	1.286	0.777	0.969	5.30611
316	NCS1_KAN708-4_2.tif:0010-0735	1.855	113.958	0	890	19.561	83.467	0.943	211.398	16410	1.171	0.854	0.935	5.64677
317	NCS1_KAN708-4_2.tif:0011-0745	1.881	113.486	0	560	132.836	84.532	0.956	213.446	16569	1.175	0.851	0.961	5.70148
318	NCS1_KAN708-4_2.tif:0012-0801	1.894	124.918	0	1216	96.018	90.915	0.938	236.557	18363	1.264	0.791	0.951	6.31881
319	NCS1_KAN708-4_2.tif:0013-0819	1.791	87.475	0	489	35.848	93.033	0.946	156.635	12159	1.307	0.765	0.959	4.18398
320	NCS1_KAN708-4_2.tif:0014-0930	2.254	130.754	0	1751	91.138	105.573	0.887	294.772	22882	1.212	0.825	0.936	7.87382
321	NCS1_KAN708-4_2.tif:0015-1003	2.074	56.143	0	489	62.162	113.753	0.844	116.443	9039	1.392	0.718	0.947	3.11037
322	NCS1_KAN708-4_2.tif:0016-1167	1.778	98.312	0	903	101.694	132.519	0.965	174.774	13567	1.089	0.918	0.958	4.66848
323	NCS1_KAN708-4_2.tif:0017-1203	1.675	144.654	0	928	126.698	136.625	0.946	242.251	18805	1.241	0.806	0.963	6.4709
324	NCS1_KAN708-4_2.tif:0018-1242	1.507	40.282	0	181	72.836	140.997	0.968	60.714	4713	1.093	0.915	0.959	1.62177
325	NCS1_KAN708-4_2.tif:0019-1265	1.662	58.279	0	513	13.057	143.572	0.902	96.849	7518	1.142	0.875	0.931	2.58699
326	NCS1_KAN708-4_3.tif:0001-0170	2.28	134.113	0	1562	100.899	19.286	0.906	305.799	23738	1.338	0.747	0.967	8.16838
327	NCS1_KAN708-4_3.tif:0002-0211	2.1	117.074	0	1075	120.404	23.92	0.854	245.832	19083	1.459	0.686	0.95	6.56657
328	NCS1_KAN708-4_3.tif:0003-0231	1.481	36.496	0	381	67.282	26.273	0.924	54.067	4197	1.301	0.769	0.947	1.44421
329	NCS1_KAN708-4_3.tif:0004-0310	2.1	5.178	0	25	97.729	35.169	0.942	10.873	844	1.055	0.948	0.939	0.290425
330	NCS1_KAN708-4_3.tif:0005-0350	1.572	16.18	0	62	45.466	39.725	0.924	25.43	1974	1.329	0.752	0.976	0.679264
331	NCS1_KAN708-4_3.tif:0006-0419	2.035	139.152	0	1269	66.586	47.605	0.869	283.229	21986	1.32	0.758	0.927	7.5655
332	NCS1_KAN708-4_3.tif:0007-0478	2.332	97.685	0	1245	76.877	54.329	0.896	227.771	17681	1.437	0.696	0.963	6.08413
333	NCS1_KAN708-4_3.tif:0008-0537	1.533	12.664	0	82	30.011	60.954	0.713	19.414	1507	2.315	0.432	0.898	0.518567
334	NCS1_KAN708-4_3.tif:0009-0611	1.675	79.669	0	493	132.51	69.415	0.92	133.421	10357	1.175	0.851	0.956	3.5639
335	NCS1_KAN708-4_3.tif:0010-0648	1.855	79.535	0	524	55.074	73.654	0.863	147.54	11453	1.352	0.74	0.926	3.94104
336	NCS1_KAN708-4_3.tif:0011-0664	2.628	19.343	0	163	98.118	75.451	0.809	50.833	3946	1.068	0.937	0.864	1.35784
337	NCS1_KAN708-4_3.tif:0012-0687	2.01	168.442	0	1787	111.658	77.945	0.898	338.507	26277	1.221	0.819	0.966	9.04206
338	NCS1_KAN708-4_3.tif:0013-0739	1.997	119.69	0	1061	77.092	83.89	0.929	238.992	18552	1.104	0.906	0.942	6.38385
339	NCS1_KAN708-4_3.tif:0014-0815	2.203	112.339	0	1107	131.814	92.5	0.909	247.468	19210	1.168	0.856	0.924	6.61027
340	NCS1_KAN708-4_3.tif:0015-0941	1.958	117.23	0	1105	47.006	106.884	0.944	229.549	17819	1.115	0.897	0.965	6.13162
341	NCS1_KAN708-4_3.tif:0016-1111	1.713	40.068	0	184	98.109	126.099	0.93	68.65	5329	1.115	0.897	0.937	1.83374
342	NCS1_KAN708-4_3.tif:0017-1141	1.726	73.582	0	592	31.192	129.506	0.937	127.019	9860	1.137	0.879	0.95	3.39288
343	NCS1_KAN708-4_3.tif:0018-1143	2.68	16.149	0	103	115.639	129.756	0.935	43.271	3359	1.17	0.855	0.943	1.15585
344	NCS1_KAN708-4_3.tif:0019-1240	1.353	10.438	0	62	70.502	140.752	0.907	14.119	1096	1.3	0.769	0.946	0.37714
345	NCS1_KAN708-4_4.tif:0001-0083	1.907	144.811	0	1318	84.402	9.502	0.944	276.092	21432	1.056	0.947	0.949	7.37487
346	NCS1_KAN708-4_4.tif:0002-0135	2.37	32.707	0	264	118.003	15.326	0.835	77.525	6018	1.48	0.676	0.918	2.07083
347	NCS1_KAN708-4_4.tif:0003-0166	1.765	110.219	0	638	45.472	18.854	0.932	194.522	15100	1.103	0.907	0.951	5.19599
348	NCS1_KAN708-4_4.tif:0004-0268	2.448	12.858	0	99	2.008	30.41	0.91	31.471	2443	1.304	0.767	0.952	0.84065
349	NCS1_KAN708-4_4.tif:0005-0299	1.443	20	0	82	70.763	34.015	0.938	28.856	2240	1.06	0.944	0.97	0.770796
350	NCS1_KAN708-4_4.tif:0006-0327	1.546	31.317	0	224	29.473	37.129	0.964	48.412	3758	1.146	0.872	0.964	1.29315
351	NCS1_KAN708-4_4.tif:0007-0371	1.804	135.414	0	1075	86.476	42.147	0.953	244.222	18958	1.174	0.852	0.969	6.52355
352	NCS1_KAN708-4_4.tif:0008-0373	2.048	63.113	0	509	132.583	42.386	0.943	129.273	10035	1.15	0.87	0.933	3.4531
353	NCS1_KAN708-4_4.tif:0009-0437	1.623	28.833	0	136	40.051	49.633	1	46.801	3633	1.045	0.957	0.958	1.25014
354	NCS1_KAN708-4_4.tif:0010-0452	1.623	13.238	0	71	28.087	51.381	0.943	21.488	1668	1.19	0.84	0.947	0.573968
355	NCS1_KAN708-4_4.tif:0011-0494	1.855	19.222	0	102	100.92	56.072	0.919	35.658	2768	1.261	0.793	0.941	0.952484
356	NCS1_KAN708-4_4.tif:0012-0633	2.126	9.182	0	56	60.311	71.93	0.877	19.517	1515	1.206	0.829	0.909	0.52132
357	NCS1_KAN708-4_4.tif:0013-0684	1.7	14.03	0	101	108.961	77.724	0.977	23.858	1852	1.086	0.921	0.94	0.637283
358	NCS1_KAN708-4_4.tif:0014-0749	1.533	28.815	0	182	28.663	85.017	0.956	44.173	3429	1.108	0.902	0.96	1.17994
359	NCS1_KAN708-4_4.tif:0015-0941	1.559	40.256	0	140	98.624	106.789	0.96	62.749	4871	1.374	0.728	0.942	1.67614
360	NCS1_KAN708-4_4.tif:0016-0991	2.164	15.94	0	88	144.233	112.571	0.893	34.499	2678	1.446	0.692	0.941	0.921515
361	NCS1_KAN708-4_4.tif:0017-1240	1.481	13.435	0	108	23.059	140.779	0.897	19.903	1545	1.333	0.75	0.95	0.531643
362	NCS1_KAN708-4_5.tif:0001-0158	2.242	114.793	0	1293	47.078	17.919	0.903	257.31	19974	1.347	0.742	0.943	6.87316
363	NCS1_KAN708-4_5.tif:0002-0161	1.713	132.617	0	710	118.199	18.212	0.93	227.217	17638	1.119	0.894	0.95	6.06933
364	NCS1_KAN708-4_5.tif:0003-0174	1.726	175.784	0	1443	100.549	19.784	0.922	303.441	23555	1.095	0.914	0.968	8.10541
365	NCS1_KAN708-4_5.tif:0004-0177	1.688	131.328	0	1323	0.895	20.077	0.902	221.626	17204	1.168	0.856	0.96	5.91999
366	NCS1_KAN708-4_5.tif:0005-0220	2.061	84.562	0	805	73.648	24.982	0.959	174.297	13530	1.088	0.919	0.958	4.65575
367	NCS1_KAN708-4_5.tif:0006-0293	1.623	90.024	0	372	41.645	33.246	0.917	146.123	11343	1.069	0.936	0.944	3.90319
368	NCS1_KAN708-4_5.tif:0007-0315	1.391	104.861	0	505	91.417	35.785	0.962	145.892	11325	1.141	0.877	0.964	3.89699
369	NCS1_KAN708-4_5.tif:0008-0482	2.486	155.658	0	1920	105.416	54.703	0.82	387.009	30042	1.461	0.685	0.928	10.3376
370	NCS1_KAN708-4_5.tif:0009-0499	2.177	92.84	0	838	120.799	56.594	0.907	202.123	15690	1.333	0.75	0.96	5.39902
371	NCS1_KAN708-4_5.tif:0010-0546	1.688	26.237	0	164	134.061	61.957	0.927	44.276	3437	1.041	0.961	0.96	1.18269
372	NCS1_KAN708-4_5.tif:0011-0560	2.229	109.491	0	1155	21.476	63.533	0.889	244.016	18942	1.319	0.758	0.913	6.51805
373	NCS1_KAN708-4_5.tif:0012-0831	1.52	47.076	0	349	19.631	94.398	0.976	71.561	5555	1.141	0.876	0.959	1.91151
374	NCS1_KAN708-4_5.tif:0013-0877	1.739	114.348	0	1278	120.021	99.526	0.944	198.863	15437	1.079	0.927	0.944	5.31196
375	NCS1_KAN708-4_5.tif:0014-0885	1.881	13.034	0	79	107.387	100.418	0.656	24.515	1903	2.666	0.375	0.88	0.654833
376	NCS1_KAN708-4_5.tif:0015-0939	2.834	129.35	0	732	79.086	106.62	0.926	366.59	28457	1.158	0.864	0.954	9.79221
377	NCS1_KAN708-4_5.tif:0016-1041	2.332	100.641	0	994	99.625	118.132	0.879	234.663	18216	1.367	0.732	0.905	6.26823
378	NCS1_KAN708-4_5.tif:0017-1112	1.907	100.297	0	1004	46.846	126.155	0.896	191.224	14844	1.237	0.808	0.952	5.1079
379	NCS1_KAN708-4_5.tif:0018-1145	1.34	30.01	0	228	19.621	129.92	0.927	40.206	3121	1.273	0.786	0.941	1.07395
380	NCS1_KAN708-4_5.tif:0019-1162	1.494	55.276	0	331	5.523	131.885	0.96	82.601	6412	1.136	0.88	0.951	2.2064
381	NCS1_KAN708-4_5.tif:0020-1215	1.894	130.49	0	873	91.631	137.914	0.89	247.107	19182	1.4	0.714	0.955	6.60063
382	NCS1_KAN708-4_6.tif:0001-0243	2.126	111.37	0	1071	29.06	27.575	0.865	236.724	18376	1.394	0.717	0.938	6.32328
383	NCS1_KAN708-4_6.tif:0002-0265	2.164	136.405	0	1202	62.877	30.089	0.947	295.21	22916	1.141	0.876	0.952	7.88552
384	NCS1_KAN708-4_6.tif:0003-0280	2.383	90.859	0	1004	109.716	31.813	0.907	216.538	16809	1.324	0.755	0.941	5.78407
385	NCS1_KAN708-4_6.tif:0004-0486	2.113	77.348	0	487	85.212	55.236	0.911	163.411	12685	1.3	0.769	0.965	4.36498
386	NCS1_KAN708-4_6.tif:0005-0529	1.533	15.739	0	102	29.344	60.039	0.956	24.128	1873	1.119	0.894	0.956	0.64451
387	NCS1_KAN708-4_6.tif:0006-0537	1.61	31.36	0	198	116.471	60.94	0.963	50.498	3920	1.023	0.978	0.951	1.34889
388	NCS1_KAN708-4_6.tif:0007-0565	1.688	16.13	0	73	132.424	64.127	0.942	27.22	2113	1.187	0.842	0.942	0.727095
389	NCS1_KAN708-4_6.tif:0008-0601	1.43	35.009	0	155	50.805	68.26	0.93	50.06	3886	1.071	0.934	0.961	1.33719
390	NCS1_KAN708-4_6.tif:0009-0627	1.842	23.308	0	215	20.533	71.12	0.937	42.937	3333	1.184	0.845	0.947	1.1469
391	NCS1_KAN708-4_6.tif:0010-0692	1.984	101.987	0	956	59.582	78.567	0.923	202.329	15706	1.347	0.743	0.948	5.40452
392	NCS1_KAN708-4_6.tif:0011-0755	1.391	14.972	0	63	60.56	85.78	0.962	20.831	1617	1.105	0.905	0.964	0.556419
393	NCS1_KAN708-4_6.tif:0012-0800	1.907	38.851	0	217	75.395	90.897	0.969	74.073	5750	1.009	0.991	0.964	1.97861
394	NCS1_KAN708-4_6.tif:0013-0918	1.7	5.47	0	37	44.677	104.265	0.898	9.301	722	1.101	0.908	0.94	0.248444
395	NCS1_KAN708-4_6.tif:0014-1046	1.855	66.278	0	524	20.798	118.719	0.943	122.948	9544	1.261	0.793	0.947	3.28414
396	NCS1_KAN708-4_6.tif:0015-1098	1.713	76.857	0	647	115.881	124.628	0.915	131.682	10222	1.186	0.843	0.967	3.51745
397	NCS1_KAN708-4_6.tif:0016-1211	1.559	41.066	0	200	86.338	137.504	0.989	64.012	4969	1.167	0.857	0.945	1.70986
										10807.8				3.71904
398	NCS1_KAN708-5_1.tif:0001-0012	1.366	25.443	0	105	69.935	1.411	0.944	34.743	2697	1.032	0.969	0.955	0.928053
399	NCS1_KAN708-5_1.tif:0002-0096	1.623	81.46	0	431	138.989	10.917	0.943	132.223	10264	1.243	0.804	0.958	3.5319
400	NCS1_KAN708-5_1.tif:0003-0226	1.932	104.253	0	592	56.916	25.697	0.983	201.453	15638	1.154	0.867	0.962	5.38112
401	NCS1_KAN708-5_1.tif:0004-0286	2.035	52.152	0	626	51.556	32.485	0.891	106.15	8240	1.299	0.77	0.929	2.83543
402	NCS1_KAN708-5_1.tif:0005-0293	1.314	8.647	0	71	100.44	33.322	0.981	11.362	882	1.117	0.895	0.967	0.303501
403	NCS1_KAN708-5_1.tif:0006-0347	1.791	113.813	0	613	82.345	39.362	0.896	203.797	15820	1.261	0.793	0.959	5.44375
404	NCS1_KAN708-5_1.tif:0007-0606	2.023	8.783	0	69	33.127	68.858	0.917	17.765	1379	1.312	0.762	0.952	0.474522
405	NCS1_KAN708-5_1.tif:0008-0724	2.254	133.766	0	1235	55.77	82.168	0.908	301.561	23409	1.297	0.771	0.936	8.05517
406	NCS1_KAN708-5_1.tif:0009-0877	1.816	143.773	0	929	123.029	99.582	0.886	261.149	20272	1.322	0.757	0.959	6.97571
407	NCS1_KAN708-5_1.tif:0010-0991	2.422	123.84	0	1037	59.912	112.544	0.799	299.925	23282	1.702	0.588	0.919	8.01146
408	NCS1_KAN708-5_1.tif:0011-1009	1.894	9.456	0	75	22.684	114.564	0.89	17.906	1390	1.448	0.691	0.958	0.478307
409	NCS1_KAN708-5_1.tif:0012-1142	2.332	75.133	0	923	84.843	129.614	0.859	175.186	13599	1.596	0.626	0.921	4.67949
410	NCS1_KAN708-5_2.tif:0001-0289	1.945	43.609	0	247	98.225	32.794	0.928	84.83	6585	1.325	0.755	0.947	2.26593
411	NCS1_KAN708-5_2.tif:0002-0409	1.34	138.788	0	498	55.568	46.43	0.969	185.942	14434	1.108	0.903	0.977	4.96682
412	NCS1_KAN708-5_2.tif:0003-0464	1.662	32	0	128	109.045	52.721	0.966	53.178	4128	1.179	0.849	0.966	1.42047
413	NCS1_KAN708-5_2.tif:0004-0569	1.7	108.159	0	518	76.245	64.644	0.923	183.92	14277	1.237	0.808	0.936	4.91279
414	NCS1_KAN708-5_2.tif:0005-0608	1.34	22.692	0	92	33.7	69.057	0.939	30.402	2360	1.12	0.893	0.972	0.812089
415	NCS1_KAN708-5_2.tif:0006-0636	1.391	12.852	0	86	90.958	72.254	0.962	17.881	1388	1.176	0.85	0.96	0.477618
416	NCS1_KAN708-5_2.tif:0007-0649	1.816	48.092	0	307	122.606	73.672	0.854	87.355	6781	1.347	0.742	0.931	2.33338
417	NCS1_KAN708-5_2.tif:0008-0759	1.507	24.915	0	122	48.739	86.096	0.886	37.552	2915	1.342	0.745	0.959	1.00307
418	NCS1_KAN708-5_2.tif:0009-0796	1.417	80.527	0	334	12.66	90.396	0.95	114.111	8858	1.023	0.977	0.961	3.04809
419	NCS1_KAN708-5_2.tif:0010-0982	1.34	10.452	0	45	114.322	111.473	0.939	14.003	1087	1.124	0.89	0.977	0.374043
420	NCS1_KAN708-5_2.tif:0011-1095	1.43	132.721	0	799	129.743	124.298	0.959	189.781	14732	1.206	0.829	0.974	5.06936
421	NCS1_KAN708-5_3.tif:0001-0415	1.675	15.838	0	91	103.557	47.172	0.973	26.525	2059	1.17	0.855	0.963	0.708513
422	NCS1_KAN708-5_3.tif:0002-0547	1.585	44.48	0	168	20.152	62.081	0.959	70.479	5471	1.306	0.766	0.976	1.8826
423	NCS1_KAN708-5_3.tif:0003-0568	1.469	50.772	0	235	60.036	64.464	0.878	74.562	5788	1.559	0.641	0.927	1.99168
424	NCS1_KAN708-5_3.tif:0004-0678	1.391	22.37	0	87	129.08	76.992	0.905	31.124	2416	1.438	0.696	0.964	0.831359
425	NCS1_KAN708-5_3.tif:0005-0714	1.791	75.763	0	465	38.54	81.115	0.921	135.663	10531	1.132	0.883	0.952	3.62378
426	NCS1_KAN708-5_3.tif:0006-0716	2.126	56.836	0	287	90.024	81.251	0.825	120.81	9378	1.825	0.548	0.962	3.22702
427	NCS1_KAN708-5_3.tif:0007-0920	1.829	17.415	0	109	57.815	104.414	0.851	31.858	2473	1.6	0.625	0.925	0.850973
428	NCS1_KAN708-5_3.tif:0008-0951	1.829	30.162	0	102	80.834	107.957	0.93	55.175	4283	1.264	0.791	0.95	1.4738
429	NCS1_KAN708-5_3.tif:0009-1053	1.533	77.807	0	284	102.672	119.504	0.956	119.277	9259	1.198	0.835	0.964	3.18607
430	NCS1_KAN708-5_4.tif:0001-0025	2.422	120.25	0	1179	27.367	2.909	0.722	291.229	22607	1.855	0.539	0.849	7.77919
431	NCS1_KAN708-5_4.tif:0002-0053	1.842	7.944	0	89	126.978	5.997	0.962	14.634	1136	1.186	0.843	0.95	0.390904
432	NCS1_KAN708-5_4.tif:0003-0163	2.345	50.604	0	321	80.238	18.478	0.757	118.646	9210	1.96	0.51	0.926	3.16921
433	NCS1_KAN708-5_4.tif:0004-0226	2.77	61.591	0	688	51.145	25.767	0.713	170.587	13242	1.385	0.722	0.869	4.55665
434	NCS1_KAN708-5_4.tif:0005-0349	2.035	38.614	0	437	31.493	39.706	0.828	78.595	6101	1.257	0.796	0.924	2.09939
435	NCS1_KAN708-5_4.tif:0006-0524	2.448	65.879	0	498	33.615	59.53	0.774	161.247	12517	1.983	0.504	0.934	4.30717
436	NCS1_KAN708-5_4.tif:0007-0683	1.971	62.81	0	683	72.338	77.548	0.871	123.798	9610	1.546	0.647	0.95	3.30685
437	NCS1_KAN708-5_4.tif:0008-0815	3.581	46.608	0	607	107.123	92.479	0.678	166.915	12957	1.709	0.585	0.848	4.45858
438	NCS1_KAN708-5_4.tif:0009-0827	1.816	9.553	0	58	7.046	93.875	0.899	17.352	1347	1.333	0.75	0.94	0.46351
439	NCS1_KAN708-5_4.tif:0010-0986	1.507	17.889	0	92	68.135	111.941	0.876	26.963	2093	1.269	0.788	0.914	0.720213
440	NCS1_KAN708-5_4.tif:0011-1154	1.919	130.208	0	965	55.794	131.015	0.902	249.929	19401	1.401	0.714	0.958	6.67599
441	NCS1_KAN708-5_4.tif:0012-1212	1.945	80.43	0	520	10.426	137.548	0.869	156.455	12145	1.244	0.804	0.947	4.17916
442	NCS1_KAN708-5_5.tif:0001-0028	2.177	31.136	0	151	35.5	3.233	0.865	67.786	5262	1.56	0.641	0.963	1.81068
443	NCS1_KAN708-5_5.tif:0002-0096	2.164	25.976	0	202	79.331	10.818	0.787	56.218	4364	1.797	0.557	0.913	1.50168
444	NCS1_KAN708-5_5.tif:0003-0386	1.597	58.847	0	207	36.059	43.79	0.928	94.002	7297	1.062	0.942	0.936	2.51094
445	NCS1_KAN708-5_5.tif:0004-0675	1.34	71.192	0	403	123.32	76.662	0.987	95.38	7404	1.088	0.919	0.95	2.54776
446	NCS1_KAN708-5_5.tif:0005-0729	1.868	122.069	0	718	58.898	82.774	0.878	228.016	17700	1.255	0.797	0.935	6.09067
447	NCS1_KAN708-5_5.tif:0006-0854	2.151	114.407	0	981	82.167	96.971	0.896	246.128	19106	1.404	0.712	0.96	6.57448
448	NCS1_KAN708-5_5.tif:0007-0879	1.494	26.069	0	68	17.222	99.756	0.932	38.956	3024	1.194	0.837	0.955	1.04058
449	NCS1_KAN708-5_5.tif:0008-1004	1.366	81.019	0	238	25.954	113.929	0.803	110.633	8588	1.846	0.542	0.934	2.95518
450	NCS1_KAN708-5_5.tif:0009-1003	1.945	97.828	0	760	126.121	113.83	0.914	190.297	14772	1.226	0.816	0.962	5.08313
451	NCS1_KAN708-5_5.tif:0010-1007	1.752	59.794	0	257	21.26	114.298	0.756	104.758	8132	1.699	0.589	0.88	2.79827
452	NCS1_KAN708-5_5.tif:0011-1233	1.649	73.953	0	443	61.585	139.996	0.906	121.943	9466	1.245	0.803	0.952	3.2573
453	NCS1_KAN708-5_5.tif:0012-1272	1.52	8	0	82	106.851	144.353	0.976	12.161	944	1.174	0.851	0.963	0.324836
454	NCS1_KAN708-5_6.tif:0001-0140	2.538	9.695	0	60	136.994	15.894	0.812	24.605	1910	1.588	0.63	0.916	0.657242
455	NCS1_KAN708-5_6.tif:0002-0145	1.739	17.985	0	87	109.772	16.461	0.944	31.278	2428	1.18	0.847	0.954	0.835488
456	NCS1_KAN708-5_6.tif:0003-0288	2.048	142.723	0	885	52.569	32.706	0.953	292.337	22693	1.081	0.925	0.958	7.80879
457	NCS1_KAN708-5_6.tif:0004-0296	1.469	21.219	0	98	81.947	33.605	0.955	31.162	2419	1.288	0.777	0.974	0.832391
458	NCS1_KAN708-5_6.tif:0005-0382	1.301	5.079	0	29	141.862	43.432	0.929	6.609	513	1.044	0.958	0.927	0.176526
459	NCS1_KAN708-5_6.tif:0006-0387	2.087	27.951	0	184	38.163	43.892	0.936	58.331	4528	1.453	0.688	0.947	1.55811
460	NCS1_KAN708-5_6.tif:0007-0515	2.383	114.573	0	1072	32.032	58.47	0.878	273.052	21196	1.452	0.689	0.923	7.29366
461	NCS1_KAN708-5_6.tif:0008-0516	1.713	112.241	0	615	108.412	58.604	0.858	192.306	14928	1.277	0.783	0.94	5.13681
462	NCS1_KAN708-5_6.tif:0009-0538	1.765	94.27	0	449	87.86	61.131	0.907	166.374	12915	1.327	0.753	0.951	4.44412
463	NCS1_KAN708-5_6.tif:0010-0660	1.778	142.174	0	775	115.527	74.951	0.939	252.75	19620	1.298	0.77	0.955	6.75135
464	NCS1_KAN708-5_6.tif:0011-0771	1.855	11.451	0	52	129.658	87.545	0.943	21.243	1649	1.222	0.818	0.944	0.56743
465	NCS1_KAN708-5_6.tif:0012-0845	1.43	20.811	0	107	33.486	95.883	0.881	29.758	2310	1.109	0.902	0.881	0.794884
466	NCS1_KAN708-5_6.tif:0013-0911	1.662	71.659	0	366	102.298	103.432	0.913	119.084	9244	1.183	0.845	0.959	3.18091
467	NCS1_KAN708-5_6.tif:0014-0932	1.662	124.202	0	640	129.317	105.853	0.939	206.399	16022	1.206	0.829	0.956	5.51326
468	NCS1_KAN708-5_6.tif:0015-0975	1.765	73.759	0	485	136.746	110.776	0.83	130.175	10105	1.287	0.777	0.91	3.47719
469	NCS1_KAN708-5_6.tif:0016-1014	1.404	26.67	0	168	27.804	115.08	0.913	37.449	2907	1.243	0.805	0.956	1.00031
470	NCS1_KAN708-5_6.tif:0017-1164	1.726	46.948	0	311	97.882	132.064	0.855	81.042	6291	1.542	0.649	0.927	2.16477
471	NCS1_KAN708-5_6.tif:0018-1234	1.907	74.473	0	666	21.899	140.121	0.887	141.988	11022	1.662	0.602	0.94	3.79273
										8881.08				3.05603
472	NCS1_KAN708-6_1.tif:0001-0024	1.366	98.877	0	569	2.742	2.72	0.916	135.019	10481	1.22	0.819	0.946	3.60657
473	NCS1_KAN708-6_1.tif:0002-0066	2.035	133.367	0	1336	50.775	7.576	0.923	271.455	21072	1.334	0.75	0.969	7.25099
474	NCS1_KAN708-6_1.tif:0003-0117	1.662	123.814	0	770	17.355	13.331	0.913	205.755	15972	1.208	0.828	0.963	5.49605
475	NCS1_KAN708-6_1.tif:0004-0193	2.048	60.717	0	281	144.075	21.95	0.906	124.365	9654	1.075	0.93	0.955	3.32199
476	NCS1_KAN708-6_1.tif:0005-0238	2.538	79.822	0	1140	110.397	27.035	0.756	202.573	15725	1.657	0.603	0.883	5.41106
477	NCS1_KAN708-6_1.tif:0006-0342	1.494	88.328	0	212	99.399	38.841	0.844	131.992	10246	1.515	0.66	0.924	3.52571
478	NCS1_KAN708-6_1.tif:0007-0359	2.332	132.044	0	1050	70.209	40.767	0.952	307.886	23900	1.004	0.996	0.933	8.22412
479	NCS1_KAN708-6_1.tif:0008-0436	1.688	92.565	0	728	42.578	49.473	0.927	156.21	12126	1.18	0.848	0.967	4.17262
480	NCS1_KAN708-6_1.tif:0009-0492	1.353	19.8	0	56	107.297	55.9	0.965	26.782	2079	1.155	0.866	0.95	0.715395
481	NCS1_KAN708-6_1.tif:0010-0495	1.675	108.577	0	865	34.446	56.252	0.973	181.833	14115	1.195	0.837	0.963	4.85705
482	NCS1_KAN708-6_1.tif:0011-0526	2.203	65.222	0	366	5.014	59.688	0.838	143.676	11153	1.452	0.689	0.902	3.83781
483	NCS1_KAN708-6_1.tif:0012-0692	2.229	53.763	0	412	42.097	78.513	0.868	119.818	9301	1.52	0.658	0.918	3.20053
484	NCS1_KAN708-6_1.tif:0013-0712	2.28	105.582	0	590	124.702	80.826	0.897	240.744	18688	1.245	0.803	0.939	6.43064
485	NCS1_KAN708-6_1.tif:0014-0739	2.023	55.14	0	319	87.781	83.839	0.823	111.522	8657	1.513	0.661	0.91	2.97892
486	NCS1_KAN708-6_1.tif:0015-0762	2.564	103.377	0	1332	112.439	86.514	0.813	265.014	20572	1.603	0.624	0.896	7.07894
487	NCS1_KAN708-6_1.tif:0016-0761	1.546	103.542	0	804	26.976	86.435	0.925	160.062	12425	1.234	0.81	0.938	4.27551
488	NCS1_KAN708-6_1.tif:0017-0881	2.473	73.432	0	761	94.664	99.99	0.791	181.627	14099	1.721	0.581	0.912	4.85154
489	NCS1_KAN708-6_1.tif:0018-0903	2.216	68.436	0	800	33.777	102.475	0.832	151.637	11771	1.423	0.703	0.925	4.05047
490	NCS1_KAN708-6_1.tif:0019-0911	2.718	108.787	0	1313	135.137	103.454	0.87	295.699	22954	1.309	0.764	0.932	7.8986
491	NCS1_KAN708-6_1.tif:0020-0984	2.306	87.19	0	786	88.145	111.74	0.907	201.053	15607	1.451	0.689	0.957	5.37045
492	NCS1_KAN708-6_1.tif:0021-1059	2.229	85.775	0	680	82.011	120.234	0.865	191.16	14839	1.588	0.63	0.969	5.10618
493	NCS1_KAN708-6_1.tif:0022-1127	1.404	113.954	0	593	119.869	127.904	0.942	160.01	12421	1.312	0.762	0.969	4.27413
494	NCS1_KAN708-6_1.tif:0023-1145	2.564	78.518	0	1039	133.161	129.946	0.796	201.285	15625	1.565	0.639	0.888	5.37665
495	NCS1_KAN708-6_1.tif:0024-1169	1.958	73.145	0	528	6.314	132.709	0.845	143.225	11118	1.421	0.704	0.924	3.82577
496	NCS1_KAN708-6_1.tif:0025-1175	2.216	117.343	0	706	22.396	133.391	0.843	260.002	20183	1.584	0.631	0.915	6.94508
497	NCS1_KAN708-6_1.tif:0026-1192	1.456	98.796	0	723	95.693	135.279	0.892	143.817	11164	1.212	0.825	0.97	3.84159
498	NCS1_KAN708-6_1.tif:0027-1202	2.319	58.439	0	585	64.571	136.457	0.817	135.508	10519	1.593	0.628	0.896	3.61965
499	NCS1_KAN708-6_1.tif:0028-1273	1.288	78.85	0	444	71.283	144.598	0.864	101.577	7885	1.469	0.681	0.948	2.71327
500	NCS1_KAN708-6_2.tif:0001-0022	2.538	124.746	0	1418	54.579	2.504	0.772	316.581	24575	1.419	0.705	0.87	8.45639
501	NCS1_KAN708-6_2.tif:0002-0039	2.628	101.319	0	1358	39.307	4.518	0.841	266.263	20669	1.594	0.627	0.923	7.11232
502	NCS1_KAN708-6_2.tif:0003-0080	1.739	29.126	0	104	63.233	9.093	0.955	50.653	3932	1.054	0.949	0.978	1.35302
503	NCS1_KAN708-6_2.tif:0004-0133	2.641	85.985	0	587	104.138	15.131	0.845	227.075	17627	1.558	0.642	0.928	6.06555
504	NCS1_KAN708-6_2.tif:0005-0242	2.048	112.025	0	843	118.149	27.472	0.953	229.459	17812	1.123	0.89	0.961	6.12921
505	NCS1_KAN708-6_2.tif:0006-0300	1.301	4.871	0	62	64.998	34.061	0.765	6.338	492	2.115	0.473	0.931	0.1693
506	NCS1_KAN708-6_2.tif:0007-0305	2.229	122.873	0	1289	72.716	34.655	0.907	273.838	21257	1.421	0.704	0.966	7.31465
507	NCS1_KAN708-6_2.tif:0008-0357	3.143	219.668	0	729	16.543	40.54	0.803	690.476	53599	1.721	0.581	0.926	18.4437
508	NCS1_KAN708-6_2.tif:0009-0375	1.533	76.992	0	341	132.162	42.524	0.928	118.027	9162	1.102	0.908	0.956	3.15269
509	NCS1_KAN708-6_2.tif:0010-0433	1.7	86.402	0	790	9.751	49.142	0.909	146.922	11405	1.169	0.856	0.967	3.92452
510	NCS1_KAN708-6_2.tif:0011-0461	1.494	36.543	0	163	52.807	52.398	0.92	54.608	4239	1.384	0.722	0.932	1.45866
511	NCS1_KAN708-6_2.tif:0012-0549	1.52	56.492	0	189	103.151	62.411	0.976	85.873	6666	1.151	0.869	0.963	2.29381
512	NCS1_KAN708-6_2.tif:0013-0568	2.576	111.045	0	1185	108.396	64.5	0.777	286.102	22209	1.92	0.521	0.899	7.64224
513	NCS1_KAN708-6_2.tif:0014-0576	2.061	78.688	0	327	23.251	65.365	0.847	162.188	12590	1.692	0.591	0.979	4.33229
514	NCS1_KAN708-6_2.tif:0015-0658	2.087	56.833	0	513	74.092	74.703	0.936	118.607	9207	1.222	0.818	0.947	3.16818
515	NCS1_KAN708-6_2.tif:0016-0686	1.932	80.16	0	829	36.614	77.887	0.854	154.896	12024	1.418	0.705	0.929	4.13752
516	NCS1_KAN708-6_2.tif:0017-0815	1.726	14.612	0	172	126.346	92.571	0.912	25.223	1958	1.264	0.791	0.944	0.673759
517	NCS1_KAN708-6_2.tif:0018-0858	1.572	135.967	0	1354	19.769	97.441	0.94	213.691	16588	1.254	0.797	0.938	5.70802
518	NCS1_KAN708-6_2.tif:0019-0932	1.404	26.606	0	138	130.416	105.794	0.942	37.359	2900	1.227	0.815	0.96	0.997906
519	NCS1_KAN708-6_2.tif:0020-0984	2.061	73.031	0	661	10.325	111.726	0.774	150.529	11685	1.658	0.603	0.899	4.02087
520	NCS1_KAN708-6_2.tif:0021-1048	2.422	68.697	0	709	82.505	118.977	0.853	166.374	12915	1.433	0.698	0.919	4.44412
521	NCS1_KAN708-6_2.tif:0022-1147	2.151	60.186	0	682	69.387	130.207	0.8	129.48	10051	1.59	0.629	0.893	3.4586
522	NCS1_KAN708-6_3.tif:0001-0066	2.01	77.487	0	759	137.838	7.53	0.826	155.721	12088	1.788	0.559	0.96	4.15955
523	NCS1_KAN708-6_3.tif:0002-0115	1.688	46.198	0	195	60.581	13.093	0.942	77.963	6052	1.091	0.916	0.942	2.08253
524	NCS1_KAN708-6_3.tif:0003-0116	2.409	75.433	0	696	103.33	13.216	0.812	181.717	14106	1.537	0.65	0.908	4.85395
525	NCS1_KAN708-6_3.tif:0004-0126	1.778	55.833	0	596	124.649	14.29	0.904	99.258	7705	1.173	0.852	0.932	2.65133
526	NCS1_KAN708-6_3.tif:0005-0176	1.997	87.355	0	886	25.399	20.058	0.861	174.426	13540	1.569	0.637	0.951	4.65919
527	NCS1_KAN708-6_3.tif:0006-0227	1.907	115.865	0	1046	21.668	25.782	0.944	220.905	17148	1.252	0.798	0.961	5.90072
528	NCS1_KAN708-6_3.tif:0007-0261	1.417	86.573	0	373	65.764	29.665	0.95	122.678	9523	1.043	0.959	0.961	3.27692
529	NCS1_KAN708-6_3.tif:0008-0276	1.546	80.092	0	596	84.758	31.369	0.909	123.811	9611	1.085	0.921	0.956	3.3072
530	NCS1_KAN708-6_3.tif:0009-0301	1.675	75.269	0	658	37.102	34.172	0.909	126.053	9785	1.107	0.904	0.932	3.36707
531	NCS1_KAN708-6_3.tif:0010-0332	1.443	8.812	0	70	128.22	37.76	0.967	12.715	987	1.092	0.916	0.974	0.339632
532	NCS1_KAN708-6_3.tif:0011-0345	1.984	70.584	0	346	104.225	39.142	0.932	140.03	10870	1.161	0.861	0.966	3.74043
533	NCS1_KAN708-6_3.tif:0012-0400	1.391	71.093	0	393	25.48	45.461	0.993	98.91	7678	1.031	0.97	0.956	2.64204
534	NCS1_KAN708-6_3.tif:0013-0452	1.507	64.803	0	572	1.978	51.3	0.94	97.673	7582	1.072	0.932	0.951	2.60901
535	NCS1_KAN708-6_3.tif:0014-0537	1.533	81.143	0	449	126.272	60.952	0.956	124.391	9656	1.101	0.908	0.956	3.32268
536	NCS1_KAN708-6_3.tif:0015-0560	2.023	73.713	0	845	37.427	63.593	0.851	149.086	11573	1.523	0.657	0.946	3.98233
537	NCS1_KAN708-6_3.tif:0016-0580	2.1	108.258	0	1054	66.876	65.824	0.854	227.32	17646	1.521	0.658	0.937	6.07209
538	NCS1_KAN708-6_3.tif:0017-0636	1.34	19.394	0	114	52.709	72.209	0.956	25.984	2017	1.129	0.886	0.941	0.694061
539	NCS1_KAN708-6_3.tif:0018-0778	1.494	75.707	0	414	48.034	88.28	0.905	113.132	8782	1.325	0.755	0.955	3.02193
540	NCS1_KAN708-6_3.tif:0019-0803	1.636	96.764	0	493	91.826	91.175	0.924	158.31	12289	1.119	0.894	0.955	4.22871
541	NCS1_KAN708-6_3.tif:0020-0834	1.997	103.852	0	1152	28.965	94.772	0.793	207.366	16097	1.478	0.676	0.906	5.53907
542	NCS1_KAN708-6_3.tif:0021-0857	1.481	93	0	646	18.908	97.353	0.935	137.776	10695	1.035	0.966	0.979	3.68021
543	NCS1_KAN708-6_3.tif:0022-0863	2.293	54.36	0	466	61.752	98.106	0.815	124.649	9676	1.519	0.658	0.918	3.32956
544	NCS1_KAN708-6_3.tif:0023-0868	1.443	117.723	0	977	118.357	98.565	0.938	169.852	13185	1.023	0.978	0.97	4.53703
545	NCS1_KAN708-6_3.tif:0024-0898	1.971	74.026	0	487	86.881	102.007	0.863	145.904	11326	1.475	0.678	0.922	3.89734
546	NCS1_KAN708-6_3.tif:0025-0924	2.1	69.479	0	819	42.578	104.851	0.826	145.892	11325	1.527	0.655	0.906	3.89699
547	NCS1_KAN708-6_3.tif:0026-1053	1.688	129.137	0	1027	66.846	119.574	0.892	217.929	16917	1.193	0.838	0.932	5.82123
548	NCS1_KAN708-6_3.tif:0027-1269	1.443	87.054	0	703	76.115	144.113	0.938	125.602	9750	1.028	0.973	0.97	3.35503
549	NCS1_KAN708-6_4.tif:0001-0048	1.494	138.466	0	1098	95.457	5.492	0.932	206.915	16062	1.149	0.87	0.951	5.52702
550	NCS1_KAN708-6_4.tif:0002-0067	1.804	116.736	0	1092	126.585	7.603	0.927	210.535	16343	1.146	0.873	0.952	5.62372
551	NCS1_KAN708-6_4.tif:0003-0116	1.881	93.171	0	976	20.687	13.203	0.931	175.237	13603	1.249	0.801	0.951	4.68087
552	NCS1_KAN708-6_4.tif:0004-0130	1.585	104.301	0	461	57.618	14.754	0.932	165.266	12829	1.307	0.765	0.976	4.41453
553	NCS1_KAN708-6_4.tif:0005-0152	2.229	106.919	0	1328	77.207	17.262	0.907	238.283	18497	1.319	0.758	0.961	6.36492
554	NCS1_KAN708-6_4.tif:0006-0151	2.216	118.151	0	1400	39.679	17.206	0.88	261.793	20322	1.254	0.797	0.95	6.99291
555	NCS1_KAN708-6_4.tif:0007-0283	1.804	119.1	0	1023	55.832	32.176	0.953	214.799	16674	1.091	0.917	0.959	5.73762
556	NCS1_KAN708-6_4.tif:0008-0294	2.512	75.682	0	862	96.832	33.427	0.885	190.116	14758	1.449	0.69	0.942	5.07831
557	NCS1_KAN708-6_4.tif:0009-0342	1.662	78.574	0	379	39.503	38.801	0.902	130.575	10136	1.056	0.947	0.918	3.48785
558	NCS1_KAN708-6_4.tif:0010-0346	2.332	93.901	0	1125	91.691	39.229	0.875	218.947	16996	1.415	0.707	0.96	5.84842
559	NCS1_KAN708-6_4.tif:0011-0358	1.623	136.675	0	1055	125.474	40.701	0.943	221.845	17221	1.191	0.84	0.951	5.92584
560	NCS1_KAN708-6_4.tif:0012-0431	1.404	119.991	0	675	25.598	49.008	0.913	168.487	13079	1.095	0.914	0.96	4.50056
561	NCS1_KAN708-6_4.tif:0013-0458	2.37	84.69	0	857	121.026	52.023	0.854	200.744	15583	1.52	0.658	0.929	5.3622
562	NCS1_KAN708-6_4.tif:0014-0499	1.327	83.767	0	424	46.293	56.683	0.93	111.148	8628	1.136	0.88	0.967	2.96894
563	NCS1_KAN708-6_4.tif:0015-0562	2.229	126.59	0	1285	74.205	63.768	0.919	282.121	21900	1.109	0.902	0.943	7.53591
564	NCS1_KAN708-6_4.tif:0016-0602	1.61	117.824	0	785	13.912	68.392	0.963	189.73	14728	1.149	0.871	0.954	5.06799
565	NCS1_KAN708-6_4.tif:0017-0730	1.61	36.048	0	141	33.664	82.829	0.936	58.047	4506	1.058	0.945	0.954	1.55054
566	NCS1_KAN708-6_4.tif:0018-0808	2.113	98.018	0	862	140.981	91.753	0.902	207.082	16075	1.239	0.807	0.937	5.5315
567	NCS1_KAN708-6_4.tif:0019-0826	1.868	65.545	0	236	100.901	93.78	0.925	122.433	9504	1.321	0.757	0.957	3.27038
568	NCS1_KAN708-6_4.tif:0020-0828	1.481	83.252	0	297	90.152	93.98	0.924	123.335	9574	1.307	0.765	0.958	3.29447
569	NCS1_KAN708-6_4.tif:0021-0854	1.868	99.407	0	785	73.517	96.958	0.95	185.685	14414	1.156	0.865	0.948	4.95994
570	NCS1_KAN708-6_4.tif:0022-0901	2.216	104.006	0	1169	135.85	102.355	0.923	230.451	17889	1.174	0.852	0.961	6.1557
571	NCS1_KAN708-6_4.tif:0023-0967	1.559	78.545	0	550	0.846	109.747	0.917	122.433	9504	1.199	0.834	0.96	3.27038
572	NCS1_KAN708-6_4.tif:0024-0978	1.546	89.558	0	222	21.719	111.067	0.952	138.446	10747	1.222	0.818	0.938	3.6981
573	NCS1_KAN708-6_4.tif:0025-1031	2.242	105.155	0	776	53.881	117.038	0.903	235.707	18297	1.284	0.779	0.935	6.2961
574	NCS1_KAN708-6_4.tif:0026-1128	1.726	85.597	0	725	88.903	128.067	0.888	147.759	11470	1.222	0.818	0.934	3.94689
575	NCS1_KAN708-6_4.tif:0027-1219	1.829	75.035	0	492	77.126	138.423	0.882	137.26	10655	1.493	0.67	0.937	3.66644
576	NCS1_KAN708-6_4.tif:0028-1236	1.494	103.147	0	632	15.541	140.261	0.96	154.136	11965	1.14	0.877	0.963	4.11722
577	NCS1_KAN708-6_4.tif:0029-1235	1.752	76.574	0	672	58.309	140.255	0.926	134.156	10414	1.379	0.725	0.951	3.58351
578	NCS1_KAN708-6_5.tif:0001-0031	2.177	93.379	0	1035	133.114	3.616	0.886	203.295	15781	1.239	0.807	0.944	5.43033
579	NCS1_KAN708-6_5.tif:0002-0120	1.7	90.235	0	440	81.538	13.687	0.961	153.441	11911	1.172	0.853	0.967	4.09864
580	NCS1_KAN708-6_5.tif:0003-0149	1.907	57.676	0	321	132.81	16.884	0.91	109.963	8536	1.121	0.892	0.922	2.93728
581	NCS1_KAN708-6_5.tif:0004-0151	1.829	72.359	0	273	20.543	17.229	0.941	132.365	10275	1.074	0.932	0.966	3.53568
582	NCS1_KAN708-6_5.tif:0005-0214	1.688	154.298	0	1290	85.339	24.329	0.868	260.389	20213	1.212	0.825	0.923	6.9554
583	NCS1_KAN708-6_5.tif:0006-0280	2.28	76.226	0	559	7.039	31.76	0.888	173.807	13492	1.472	0.679	0.927	4.64267
584	NCS1_KAN708-6_5.tif:0007-0286	2.293	137.028	0	1600	133.544	32.537	0.893	314.211	24391	1.118	0.895	0.915	8.39308
585	NCS1_KAN708-6_5.tif:0008-0319	1.288	45.61	0	175	81.558	36.187	0.903	58.756	4561	1.387	0.721	0.966	1.56947
586	NCS1_KAN708-6_5.tif:0009-0346	2.087	105.617	0	1062	44.645	39.355	0.946	220.415	17110	1.174	0.851	0.967	5.88765
587	NCS1_KAN708-6_5.tif:0010-0469	2.203	131.93	0	1197	83.51	53.299	0.896	290.624	22560	1.179	0.848	0.945	7.76302
588	NCS1_KAN708-6_5.tif:0011-0483	1.894	79.265	0	461	104.159	54.812	0.913	150.104	11652	1.223	0.818	0.961	4.00952
589	NCS1_KAN708-6_5.tif:0012-0489	2.332	118.956	0	1058	125.562	55.471	0.896	277.368	21531	1.468	0.681	0.958	7.40894
590	NCS1_KAN708-6_5.tif:0013-0503	1.842	139.399	0	1199	79.315	57.109	0.889	256.795	19934	1.193	0.838	0.935	6.8594
591	NCS1_KAN708-6_5.tif:0014-0571	1.726	129.612	0	908	23.522	64.811	0.888	223.739	17368	1.376	0.727	0.944	5.97642
592	NCS1_KAN708-6_5.tif:0015-0681	1.804	113.35	0	814	60.899	77.399	0.87	204.428	15869	1.457	0.686	0.933	5.46061
593	NCS1_KAN708-6_5.tif:0016-0705	1.52	111.288	0	856	2.779	80.058	0.92	169.17	13132	1.131	0.884	0.959	4.51879
594	NCS1_KAN708-6_5.tif:0017-0753	1.469	109.614	0	461	46.861	85.525	0.972	160.977	12496	1.208	0.828	0.95	4.29994
595	NCS1_KAN708-6_5.tif:0018-0904	2.1	79.466	0	745	111.764	102.623	0.897	166.864	12953	1.364	0.733	0.937	4.4572
596	NCS1_KAN708-6_5.tif:0019-0912	2.28	108.141	0	944	78.793	103.478	0.906	246.579	19141	1.355	0.738	0.97	6.58652
597	NCS1_KAN708-6_5.tif:0020-1000	1.816	61.028	0	611	37.9	113.545	0.949	110.852	8605	1.219	0.82	0.94	2.96103
598	NCS1_KAN708-6_5.tif:0021-1005	1.301	37.149	0	162	57.643	114.047	0.912	48.334	3752	1.144	0.874	0.971	1.29108
599	NCS1_KAN708-6_5.tif:0022-1113	1.945	158.338	0	1234	111.233	126.309	0.914	308.002	23909	1.236	0.809	0.956	8.22722
600	NCS1_KAN708-6_5.tif:0023-1198	1.391	104.204	0	763	72.316	136.023	0.933	144.977	11254	1.134	0.882	0.956	3.87256
601	NCS1_KAN708-6_6.tif:0001-0088	2.074	132.646	0	966	33.632	9.959	0.864	275.113	21356	1.269	0.788	0.936	7.34872
602	NCS1_KAN708-6_6.tif:0002-0192	1.855	131.354	0	1084	68.391	21.784	0.954	243.668	18915	1.147	0.872	0.973	6.50876
603	NCS1_KAN708-6_6.tif:0003-0272	2.061	124.987	0	933	108.705	30.92	0.934	257.619	19998	1.266	0.79	0.961	6.88142
604	NCS1_KAN708-6_6.tif:0004-0332	2.229	158.52	0	2111	74.164	37.662	0.877	353.283	27424	1.287	0.777	0.93	9.43675
605	NCS1_KAN708-6_6.tif:0005-0330	2.138	115.169	0	1398	109.871	37.477	0.891	246.283	19118	1.395	0.717	0.943	6.57861
606	NCS1_KAN708-6_6.tif:0006-0381	1.816	86.83	0	754	22.699	43.222	0.924	157.717	12243	1.184	0.844	0.934	4.21288
607	NCS1_KAN708-6_6.tif:0007-0392	2.306	80.726	0	358	110.059	44.571	0.907	186.149	14450	1.282	0.78	0.955	4.97232
608	NCS1_KAN708-6_6.tif:0008-0393	2.113	73.073	0	385	139.851	44.671	0.925	154.381	11984	1.345	0.743	0.953	4.12376
609	NCS1_KAN708-6_6.tif:0009-0393	1.469	104.105	0	565	6.777	44.665	0.927	152.887	11868	1.032	0.969	0.974	4.08384
610	NCS1_KAN708-6_6.tif:0010-0492	2.383	159.276	0	1608	82.926	55.831	0.858	379.588	29466	1.53	0.653	0.916	10.1394
611	NCS1_KAN708-6_6.tif:0011-0558	1.804	102.036	0	980	42.181	63.321	0.953	184.023	14285	1.148	0.871	0.959	4.91555
612	NCS1_KAN708-6_6.tif:0012-0564	2.847	76.258	0	760	139.215	64.063	0.859	217.105	16853	1.486	0.673	0.923	5.79921
613	NCS1_KAN708-6_6.tif:0013-0695	2.267	92.727	0	686	57.673	78.973	0.904	210.238	16320	1.38	0.725	0.929	5.6158
614	NCS1_KAN708-6_6.tif:0014-0719	2.345	107.824	0	1269	29.204	81.663	0.913	252.801	19624	1.289	0.776	0.933	6.75273
615	NCS1_KAN708-6_6.tif:0015-0725	2.087	121.111	0	1049	109.864	82.341	0.913	252.75	19620	1.15	0.87	0.945	6.75135
616	NCS1_KAN708-6_6.tif:0016-0801	2.486	110.104	0	1313	104.21	90.992	0.876	273.748	21250	1.285	0.778	0.928	7.31224
617	NCS1_KAN708-6_6.tif:0017-0803	2.293	142.955	0	1557	84.015	91.208	0.924	327.802	25446	1.077	0.928	0.944	8.75611
618	NCS1_KAN708-6_6.tif:0018-0851	2.01	91.301	0	1113	15.275	96.622	0.911	183.482	14243	1.122	0.891	0.948	4.90109
619	NCS1_KAN708-6_6.tif:0019-0857	1.958	70.263	0	297	51.711	97.238	0.866	137.582	10680	1.339	0.747	0.927	3.67505
620	NCS1_KAN708-6_6.tif:0020-1001	1.997	126.342	0	934	50.852	113.585	0.953	252.273	19583	1.112	0.899	0.96	6.73862
621	NCS1_KAN708-6_6.tif:0021-1029	1.43	89.73	0	565	1.143	116.818	0.902	128.307	9960	1.215	0.823	0.969	3.42729
622	NCS1_KAN708-6_6.tif:0022-1071	2.151	69.491	0	513	128.616	121.596	0.887	149.499	11605	1.561	0.641	0.933	3.99334
623	NCS1_KAN708-6_6.tif:0023-1078	1.842	189.916	0	1532	87.868	122.421	0.947	349.856	27158	1.083	0.923	0.966	9.34522
624	NCS1_KAN708-6_6.tif:0024-1151	1.945	144.126	0	1420	123.747	130.698	0.938	280.356	21763	1.136	0.881	0.962	7.48877
625	NCS1_KAN708-6_6.tif:0025-1210	1.52	184.881	0	1253	62.271	137.35	0.948	281.039	21816	1.152	0.868	0.959	7.50701
										14125.6				4.86071
626	NCS1_KAN708-7_1.tif:0001-0254	1.456	123.478	0	396	136.885	28.835	0.947	179.746	13953	1.211	0.826	0.974	4.8013
627	NCS1_KAN708-7_1.tif:0002-0262	2.667	115.435	0	951	50.05	29.698	0.835	307.821	23895	1.741	0.574	0.941	8.2224
628	NCS1_KAN708-7_1.tif:0003-0407	1.34	91.394	0	324	26.563	46.216	0.821	122.446	9505	1.529	0.654	0.941	3.27072
629	NCS1_KAN708-7_1.tif:0004-0503	1.829	45.93	0	377	104.976	57.146	0.744	84.018	6522	1.888	0.53	0.882	2.24426
630	NCS1_KAN708-7_1.tif:0005-0549	1.713	163.925	0	1114	138.703	62.316	0.867	280.859	21802	1.168	0.856	0.964	7.50219
631	NCS1_KAN708-7_1.tif:0006-0567	1.842	126.846	0	699	34.849	64.326	0.889	233.671	18139	1.336	0.748	0.944	6.24173
632	NCS1_KAN708-7_1.tif:0007-0806	1.868	155.028	0	847	91.684	91.549	0.901	289.58	22479	1.321	0.757	0.951	7.73515
633	NCS1_KAN708-7_1.tif:0008-0915	1.585	123.886	0	513	43.815	103.894	0.932	196.3	15238	1.289	0.776	0.976	5.24348
634	NCS1_KAN708-7_1.tif:0009-1272	1.481	121.687	0	554	93.632	144.37	0.882	180.274	13994	1.234	0.81	0.979	4.81541
635	NCS1_KAN708-7_2.tif:0001-0099	2.267	102.688	0	570	70.683	11.309	0.871	232.821	18073	1.374	0.728	0.931	6.21902
636	NCS1_KAN708-7_2.tif:0002-0244	2.048	104.189	0	487	101.75	27.704	0.745	213.407	16566	1.555	0.643	0.859	5.70045
637	NCS1_KAN708-7_2.tif:0003-0362	1.688	110.092	0	557	47.501	41.169	0.927	185.788	14422	1.233	0.811	0.96	4.96269
638	NCS1_KAN708-7_2.tif:0004-0692	2.267	128.915	0	1197	76.234	78.582	0.741	292.285	22689	1.747	0.572	0.867	7.80741
639	NCS1_KAN708-7_2.tif:0005-0705	1.907	136.209	0	631	111.553	80.097	0.92	259.693	20159	1.161	0.861	0.955	6.93682
640	NCS1_KAN708-7_2.tif:0006-0730	1.7	170.705	0	873	23.473	82.877	0.909	290.276	22533	1.227	0.815	0.974	7.75373
641	NCS1_KAN708-7_2.tif:0007-0787	1.932	109.473	0	687	43.263	89.4	0.854	211.539	16421	1.376	0.727	0.932	5.65056
642	NCS1_KAN708-7_2.tif:0008-0942	1.481	10.217	0	55	97.841	106.932	0.94	15.137	1175	1.323	0.756	0.935	0.404324
643	NCS1_KAN708-7_2.tif:0009-0991	1.907	91.581	0	572	46.506	112.544	0.733	174.606	13554	1.777	0.563	0.868	4.66401
644	NCS1_KAN708-7_2.tif:0010-1027	1.907	113.345	0	663	136.674	116.564	0.944	216.1	16775	1.196	0.836	0.952	5.77237
645	NCS1_KAN708-7_2.tif:0011-1099	1.52	119.492	0	614	108.249	124.816	0.92	181.64	14100	1.251	0.8	0.955	4.85189
646	NCS1_KAN708-7_3.tif:0001-0082	1.636	62.921	0	252	53.523	9.349	0.924	102.942	7991	1.266	0.79	0.955	2.74975
647	NCS1_KAN708-7_3.tif:0002-0318	1.752	175.022	0	853	129.918	36.083	0.978	306.636	23803	1.264	0.791	0.961	8.19074
648	NCS1_KAN708-7_3.tif:0003-0537	1.675	201.685	0	1129	76.594	60.975	0.973	337.76	26219	1.159	0.863	0.967	9.0221
649	NCS1_KAN708-7_3.tif:0004-0719	2.254	100.297	0	599	107.209	81.698	0.753	226.109	17552	1.779	0.562	0.871	6.03974
650	NCS1_KAN708-7_3.tif:0005-0780	1.7	130	0	1078	49.827	88.541	0.874	221.059	17160	1.562	0.64	0.946	5.90485
651	NCS1_KAN708-7_3.tif:0006-0787	1.507	30.436	0	152	119.451	89.399	0.901	45.874	3561	1.412	0.708	0.925	1.22536
652	NCS1_KAN708-7_3.tif:0007-0805	1.417	84.327	0	291	22.919	91.376	0.922	119.496	9276	1.289	0.776	0.973	3.19192
653	NCS1_KAN708-7_3.tif:0008-0852	1.778	85.319	0	321	70.035	96.786	0.845	151.676	11774	1.555	0.643	0.965	4.0515
654	NCS1_KAN708-7_4.tif:0001-0086	1.675	143.685	0	799	21.352	9.736	0.871	240.628	18679	1.455	0.687	0.97	6.42755
655	NCS1_KAN708-7_4.tif:0002-0161	2.306	119.274	0	861	88.715	18.304	0.878	275.036	21350	1.556	0.643	0.947	7.34665
656	NCS1_KAN708-7_4.tif:0003-0175	1.546	74.833	0	196	48.059	19.931	0.981	115.683	8980	1.271	0.787	0.941	3.09007
657	NCS1_KAN708-7_4.tif:0004-0225	1.675	85.577	0	257	4.833	25.486	0.808	143.315	11125	1.874	0.534	0.922	3.82817
658	NCS1_KAN708-7_4.tif:0005-0305	2.151	140.473	0	1146	114.842	34.699	0.846	302.205	23459	1.478	0.677	0.918	8.07237
659	NCS1_KAN708-7_4.tif:0006-0328	2.924	8.974	0	40	62.012	37.282	0.73	26.241	2037	2.161	0.463	0.88	0.700943
660	NCS1_KAN708-7_4.tif:0007-0551	2.177	135.124	0	833	101.991	62.575	0.907	294.179	22836	1.262	0.793	0.949	7.85799
661	NCS1_KAN708-7_4.tif:0008-0605	1.971	138.405	0	662	117.348	68.704	0.926	272.795	21176	1.163	0.86	0.959	7.28678
662	NCS1_KAN708-7_4.tif:0009-0709	1.713	129.579	0	479	99.781	80.448	0.941	222.013	17234	1.039	0.962	0.967	5.93031
663	NCS1_KAN708-7_4.tif:0010-0870	1.816	126.801	0	697	74.192	98.832	0.934	230.322	17879	1.311	0.763	0.969	6.15226
664	NCS1_KAN708-7_4.tif:0011-0893	2.023	107.242	0	768	47.451	101.367	0.759	216.898	16837	1.768	0.565	0.885	5.7937
665	NCS1_KAN708-7_4.tif:0012-0964	2.01	129.295	0	1122	21.19	109.474	0.858	259.835	20170	1.385	0.722	0.904	6.94061
666	NCS1_KAN708-7_5.tif:0001-0135	2.087	140.265	0	1113	85.4	15.343	0.87	292.723	22723	1.603	0.624	0.953	7.81911
667	NCS1_KAN708-7_5.tif:0002-0232	1.7	111.727	0	648	11.269	26.313	0.898	189.987	14748	1.27	0.787	0.936	5.07487
668	NCS1_KAN708-7_5.tif:0003-0246	1.7	156.318	0	715	119.466	27.944	0.934	265.812	20634	1.16	0.862	0.971	7.10027
669	NCS1_KAN708-7_5.tif:0004-0332	1.585	7.602	0	48	45.018	37.722	0.745	12.045	935	2.297	0.435	0.918	0.321739
670	NCS1_KAN708-7_5.tif:0005-0361	1.791	152.935	0	875	100.726	40.971	0.972	273.851	21258	1.114	0.897	0.962	7.315
671	NCS1_KAN708-7_5.tif:0006-0407	1.391	47.537	0	111	67.284	46.225	0.905	66.137	5134	1.193	0.838	0.956	1.76664
672	NCS1_KAN708-7_5.tif:0007-0509	2.267	109.852	0	1049	126.117	57.812	0.871	249.065	19334	1.323	0.756	0.929	6.65294
673	NCS1_KAN708-7_5.tif:0008-0574	2.357	128.443	0	1036	21.325	65.209	0.711	302.797	23505	1.953	0.512	0.841	8.0882
674	NCS1_KAN708-7_5.tif:0009-0582	1.597	162.016	0	830	66.161	66.117	0.888	258.804	20090	1.316	0.76	0.976	6.91308
675	NCS1_KAN708-7_5.tif:0010-0631	1.945	129.205	0	1240	48.301	71.561	0.86	251.333	19510	1.54	0.649	0.941	6.7135
676	NCS1_KAN708-7_5.tif:0011-1215	1.314	158.48	0	780	71.232	137.905	0.95	208.242	16165	1.162	0.861	0.971	5.56247
677	NCS1_KAN708-7_5.tif:0012-1265	1.752	95.14	0	739	48.448	143.648	0.748	166.683	12939	1.889	0.529	0.875	4.45238
678	NCS1_KAN708-7_6.tif:0001-0029	1.443	217.482	0	1308	95.749	3.344	0.938	313.786	24358	1.143	0.875	0.97	8.38172
679	NCS1_KAN708-7_6.tif:0002-0069	2.409	134.818	0	1483	80.309	7.922	0.876	324.774	25211	1.447	0.691	0.93	8.67524
680	NCS1_KAN708-7_6.tif:0003-0228	2.589	133.488	0	1448	119.882	25.957	0.772	345.644	26831	1.716	0.583	0.889	9.2327
681	NCS1_KAN708-7_6.tif:0004-0299	1.842	82.294	0	549	65.157	33.953	0.937	151.598	11768	1.205	0.83	0.947	4.04943
682	NCS1_KAN708-7_6.tif:0005-0357	2.396	96.731	0	886	31.662	40.624	0.833	231.777	17992	1.781	0.561	0.956	6.19115
683	NCS1_KAN708-7_6.tif:0006-0436	1.688	163.74	0	1090	123.907	49.558	0.902	276.324	21450	1.218	0.821	0.963	7.38106
684	NCS1_KAN708-7_6.tif:0007-0588	2.126	142.006	0	1175	128.113	66.782	0.886	301.844	23431	1.487	0.673	0.948	8.06274
685	NCS1_KAN708-7_6.tif:0008-0615	2.357	86.929	0	668	109.578	69.787	0.906	204.931	15908	1.154	0.867	0.941	5.47403
686	NCS1_KAN708-7_6.tif:0009-0698	2.267	116.903	0	1289	69.394	79.264	0.851	265.052	20575	1.539	0.65	0.939	7.07997
687	NCS1_KAN708-7_6.tif:0010-0714	2.448	123.763	0	1021	76.819	81.045	0.91	302.926	23515	1.251	0.8	0.934	8.09164
688	NCS1_KAN708-7_6.tif:0011-0772	2.267	93.517	0	761	130.071	87.555	0.863	212.029	16459	1.418	0.705	0.924	5.66363
689	NCS1_KAN708-7_6.tif:0012-0920	1.688	197.267	0	1641	117.937	104.431	0.953	332.903	25842	1.049	0.953	0.96	8.89237
690	NCS1_KAN708-7_6.tif:0013-0992	2.551	117.545	0	958	98.38	112.548	0.871	299.822	23274	1.335	0.749	0.912	8.00871
										17148.9				5.90104

## Sheet: IF condition
Exp. number	Cell line	Gene induced	Culture condition, fixation condition	rabbit-Alexa488	mouse IgG1-Alexa568	mouse IgG2b-Alexa647	Nuclear stain	Date	Replicate
Replicate 1
KAN703-1	RPE-hTERT		Confluent, fixed in 100% methanol for 5 minutes at -20C.	NCS1, Cell Signaling, 8237P, 1:500	CEP170, Invitrogen, 41-3200, 1:1000	FGFR1OP, Abnova, H00011116-M01, 1:1000	DAPI	2021-10-05
KAN703-2	RPE-hTERT	+DMSO	Serum starved for 3 hours. Fixed in 100% methanol at -20C for 5 minutes.	NCS1, Cell Signaling, 8237P, 1:500	CEP170, Invitrogen, 41-3200, 1:1000	FGFR1OP, Abnova, H00011116-M01, 1:1000	DAPI	2021-10-05
KAN703-3	RPE-hTERT	+ 10 µM nocodazole	Serum starved for 3 hours. Fixed in 100% methanol at -20C for 5 minutes.	NCS1, Cell Signaling, 8237P, 1:500	CEP170, Invitrogen, 41-3200, 1:1000	FGFR1OP, Abnova, H00011116-M01, 1:1000	DAPI	2021-10-05
KAN703-4	RPE-hTERT	+DMSO	Serum starved for 8 hours. Fixed in 100% methanol at -20C for 5 minutes.	NCS1, Cell Signaling, 8237P, 1:500	CEP170, Invitrogen, 41-3200, 1:1000	FGFR1OP, Abnova, H00011116-M01, 1:1000	DAPI	2021-10-05
KAN703-5	RPE-hTERT	+ 10 µM nocodazole	Serum starved for 8 hours. Fixed in 100% methanol at -20C for 5 minutes.	NCS1, Cell Signaling, 8237P, 1:500	CEP170, Invitrogen, 41-3200, 1:1000	FGFR1OP, Abnova, H00011116-M01, 1:1000	DAPI	2021-10-05
KAN703-6	RPE-hTERT	+DMSO	Serum starved for 24 hours. Fixed in 100% methanol at -20C for 5 minutes.	NCS1, Cell Signaling, 8237P, 1:500	CEP170, Invitrogen, 41-3200, 1:1000	FGFR1OP, Abnova, H00011116-M01, 1:1000	DAPI	2021-10-05
KAN703-7	RPE-hTERT	+ 10 µM nocodazole	Serum starved for 24 hours. Fixed in 100% methanol at -20C for 5 minutes.	NCS1, Cell Signaling, 8237P, 1:500	CEP170, Invitrogen, 41-3200, 1:1000	FGFR1OP, Abnova, H00011116-M01, 1:1000	DAPI	2021-10-05
Replicate 2
KAN708-1	RPE-hTERT		Confluent, fixed in 100% methanol for 5 minutes at -20C.	NCS1, Cell Signaling, 8237P, 1:500	CEP170, Invitrogen, 41-3200, 1:1000	FGFR1OP, Abnova, H00011116-M01, 1:1000	DAPI	2021-10-08
KAN708-2	RPE-hTERT	+DMSO	Serum starved for 3 hours. Fixed in 100% methanol at -20C for 5 minutes.	NCS1, Cell Signaling, 8237P, 1:500	CEP170, Invitrogen, 41-3200, 1:1000	FGFR1OP, Abnova, H00011116-M01, 1:1000	DAPI	2021-10-08
KAN708-3	RPE-hTERT	+ 10 µM nocodazole	Serum starved for 3 hours. Fixed in 100% methanol at -20C for 5 minutes.	NCS1, Cell Signaling, 8237P, 1:500	CEP170, Invitrogen, 41-3200, 1:1000	FGFR1OP, Abnova, H00011116-M01, 1:1000	DAPI	2021-10-08
KAN708-4	RPE-hTERT	+DMSO	Serum starved for 8 hours. Fixed in 100% methanol at -20C for 5 minutes.	NCS1, Cell Signaling, 8237P, 1:500	CEP170, Invitrogen, 41-3200, 1:1000	FGFR1OP, Abnova, H00011116-M01, 1:1000	DAPI	2021-10-08
KAN708-5	RPE-hTERT	+ 10 µM nocodazole	Serum starved for 8 hours. Fixed in 100% methanol at -20C for 5 minutes.	NCS1, Cell Signaling, 8237P, 1:500	CEP170, Invitrogen, 41-3200, 1:1000	FGFR1OP, Abnova, H00011116-M01, 1:1000	DAPI	2021-10-08
KAN708-6	RPE-hTERT	+DMSO	Serum starved for 24 hours. Fixed in 100% methanol at -20C for 5 minutes.	NCS1, Cell Signaling, 8237P, 1:500	CEP170, Invitrogen, 41-3200, 1:1000	FGFR1OP, Abnova, H00011116-M01, 1:1000	DAPI	2021-10-08
KAN708-7	RPE-hTERT	+ 10 µM nocodazole	Serum starved for 24 hours. Fixed in 100% methanol at -20C for 5 minutes.	NCS1, Cell Signaling, 8237P, 1:500	CEP170, Invitrogen, 41-3200, 1:1000	FGFR1OP, Abnova, H00011116-M01, 1:1000	DAPI	2021-10-08
