# Supplementary material for: Myristoylated Neuronal Calcium Sensor-1 captures the preciliary vesicle at distal appendages
Source: eLife. 2025 Jan 30;14:e85998. doi: 10.7554/eLife.85998 (PMC11984960; doi:10.7554/eLife.85998)
Supplement: Figure 6—source data 5. [file elife-85998-fig6-data5.xlsx]

## Sheet: Raw data
	Label	Area	Mean	Min	Max	X	Y	Circ	IntDen	RawIntDen	AR	Round	Solidity
1	NCS1_KAN431-1_1.tif:0001-0066	2.316	30.986	0	378	61.901	6.735	0.801	71.78	6848	1.377	0.726	0.879	1.5742
2	NCS1_KAN431-1_1.tif:0002-0074	1.855	33.124	0	234	118.435	7.566	0.941	61.455	5863	1.114	0.897	0.947	1.34777
3	NCS1_KAN431-1_1.tif:0003-0155	1.572	30.233	0	265	15.996	15.802	0.922	47.535	4535	1.272	0.786	0.952	1.04249
4	NCS1_KAN431-1_1.tif:0004-0253	2.149	34.766	0	375	68.635	25.919	0.845	74.704	7127	1.382	0.724	0.919	1.63833
5	NCS1_KAN431-1_1.tif:0005-0320	1.446	31.768	0	237	38.341	32.731	0.939	45.952	4384	1.083	0.923	0.952	1.00778
6	NCS1_KAN431-1_1.tif:0006-0342	1.174	14.25	0	104	125.063	35.056	0.938	16.729	1596	1.137	0.879	0.97	0.366884
7	NCS1_KAN431-1_1.tif:0007-0408	1.792	30.585	0	339	83.064	41.811	0.783	54.82	5230	1.413	0.708	0.884	1.20226
8	NCS1_KAN431-1_1.tif:0008-0511	1.813	26.595	0	268	14.112	52.409	0.837	48.227	4601	1.39	0.719	0.928	1.05766
9	NCS1_KAN431-1_1.tif:0009-0841	1.226	7.855	0	28	92.135	86.186	0.968	9.633	919	1.133	0.882	0.955	0.211257
10	NCS1_KAN431-1_1.tif:0010-0847	1.551	16.953	0	234	13.386	86.764	0.91	26.299	2509	1.352	0.74	0.943	0.576762
11	NCS1_KAN431-1_1.tif:0011-0871	1.457	12.108	0	147	39.067	89.223	0.911	17.641	1683	1.105	0.905	0.93	0.386883
12	NCS1_KAN431-1_2.tif:0001-0159	1.499	42.937	0	369	61.682	16.317	0.889	64.359	6140	1.371	0.729	0.947	1.41145
13	NCS1_KAN431-1_2.tif:0002-0233	1.384	15.735	0	100	77.487	23.849	0.949	21.771	2077	1.118	0.894	0.946	0.477455
14	NCS1_KAN431-1_2.tif:0003-0237	1.73	31.727	0	285	113.558	24.313	0.908	54.873	5235	1.379	0.725	0.954	1.20341
15	NCS1_KAN431-1_2.tif:0004-0252	1.646	30.204	0	283	137.744	25.818	0.872	49.705	4742	1.51	0.662	0.96	1.09008
16	NCS1_KAN431-1_2.tif:0005-0286	1.247	27.504	0	256	10.209	29.297	0.956	34.307	3273	1.107	0.903	0.956	0.752388
17	NCS1_KAN431-1_2.tif:0006-0377	1.363	23.823	0	118	33.923	38.621	0.962	32.462	3097	1.103	0.906	0.935	0.711929
18	NCS1_KAN431-1_2.tif:0007-0388	1.803	19.669	0	234	14.836	39.807	0.798	35.46	3383	1.389	0.72	0.889	0.777674
19	NCS1_KAN431-1_2.tif:0008-0467	1.667	30.547	0	216	65.649	47.9	0.866	50.91	4857	1.394	0.717	0.901	1.11651
20	NCS1_KAN431-1_2.tif:0009-0538	1.436	7.328	0	37	117.96	55.021	0.884	10.524	1004	1.281	0.78	0.961	0.230797
21	NCS1_KAN431-1_2.tif:0010-0646	1.405	49.761	0	306	105.233	66.204	0.964	69.893	6668	1.127	0.887	0.944	1.53282
22	NCS1_KAN431-1_2.tif:0011-0775	1.184	7.487	0	67	62.639	79.411	0.935	8.868	846	1.221	0.819	0.95	0.194476
23	NCS1_KAN431-1_2.tif:0012-0830	1.415	14.356	0	160	31.958	85.018	0.944	20.314	1938	1.131	0.884	0.947	0.445502
24	NCS1_KAN431-1_2.tif:0013-0843	1.656	34.62	0	378	141.232	86.299	0.828	57.336	5470	1.437	0.696	0.929	1.25743
25	NCS1_KAN431-1_2.tif:0014-0850	1.321	27.214	0	205	2.386	87.051	0.892	35.942	3429	1.175	0.851	0.947	0.788248
26	NCS1_KAN431-1_2.tif:0015-0903	1.845	25.938	0	271	124.378	92.398	0.859	47.85	4565	1.086	0.921	0.962	1.04939
27	NCS1_KAN431-1_2.tif:0016-0980	1.279	33.254	0	246	99.546	100.374	0.888	42.525	4057	1.257	0.795	0.935	0.932611
28	NCS1_KAN431-1_3.tif:0001-0096	2.107	28.343	0	334	51.722	9.955	0.788	59.715	5697	1.362	0.734	0.882	1.30961
29	NCS1_KAN431-1_3.tif:0002-0133	1.73	24.752	0	219	113.235	13.664	0.836	42.808	4084	1.437	0.696	0.914	0.938818
30	NCS1_KAN431-1_3.tif:0003-0169	1.761	35.738	0	359	29.166	17.302	0.893	62.933	6004	1.137	0.88	0.926	1.38018
31	NCS1_KAN431-1_3.tif:0004-0338	1.656	34.304	0	292	136.175	34.565	0.801	56.812	5420	1.595	0.627	0.903	1.24593
32	NCS1_KAN431-1_3.tif:0005-0392	2.264	29.106	0	279	93.316	40.151	0.759	65.899	6287	1.528	0.654	0.9	1.44524
33	NCS1_KAN431-1_3.tif:0006-0415	2.149	26.273	0	279	33.734	42.405	0.669	56.455	5386	1.762	0.568	0.825	1.23812
34	NCS1_KAN431-1_3.tif:0007-0430	1.834	36.977	0	355	75.452	44.045	0.82	67.828	6471	1.562	0.64	0.916	1.48753
35	NCS1_KAN431-1_3.tif:0008-0472	1.593	8.612	0	43	121.09	48.324	0.944	13.721	1309	1.197	0.835	0.965	0.300909
36	NCS1_KAN431-1_3.tif:0009-0496	1.541	39.19	0	281	135.7	50.811	0.868	60.386	5761	1.222	0.819	0.942	1.32432
37	NCS1_KAN431-1_3.tif:0010-0571	2.023	22.648	0	279	62.457	58.534	0.82	45.816	4371	1.298	0.77	0.91	1.00479
38	NCS1_KAN431-1_3.tif:0011-0720	1.258	4.55	0	38	19.834	73.783	0.898	5.723	546	1.231	0.812	0.934	0.125513
39	NCS1_KAN431-1_3.tif:0012-0755	1.373	5.481	0	41	126.554	77.361	0.969	7.526	718	1.067	0.938	0.936	0.165052
40	NCS1_KAN431-1_3.tif:0013-0876	1.059	15.812	0	71	118.382	89.737	0.941	16.74	1597	1.139	0.878	0.967	0.367114
41	NCS1_KAN431-1_3.tif:0014-0883	2.013	31.719	0	278	77.738	90.542	0.852	63.835	6090	1.21	0.827	0.914	1.39995
42	NCS1_KAN431-1_3.tif:0015-0901	1.499	4.839	0	29	141.262	92.253	0.962	7.253	692	1.045	0.957	0.947	0.159075
43	NCS1_KAN431-1_3.tif:0016-0939	1.436	29.825	0	224	14.66	96.205	0.958	42.829	4086	1.093	0.915	0.951	0.939278
44	NCS1_KAN431-1_4.tif:0001-0023	2.128	35.931	0	360	36.593	2.304	0.757	76.455	7294	1.635	0.612	0.86	1.67672
45	NCS1_KAN431-1_4.tif:0002-0113	1.635	21.526	0	172	3.547	11.612	0.867	35.198	3358	1.213	0.825	0.929	0.771927
46	NCS1_KAN431-1_4.tif:0003-0243	1.499	27.594	0	179	22.788	24.905	0.912	41.361	3946	1.092	0.916	0.938	0.907095
47	NCS1_KAN431-1_4.tif:0004-0313	1.887	34.217	0	253	103.592	31.993	0.835	64.558	6159	1.469	0.681	0.898	1.41581
48	NCS1_KAN431-1_4.tif:0005-0324	1.75	14.389	0	157	86.375	33.232	0.919	25.188	2403	1.173	0.853	0.946	0.552395
49	NCS1_KAN431-1_4.tif:0006-0343	1.834	33.509	0	240	40.654	35.148	0.878	61.466	5864	1.382	0.723	0.921	1.348
50	NCS1_KAN431-1_4.tif:0007-0406	1.509	6.944	0	37	67.921	41.584	0.919	10.482	1000	1.024	0.977	0.938	0.229877
51	NCS1_KAN431-1_4.tif:0008-0526	1.53	48.021	0	354	83.084	53.874	0.931	73.488	7011	1.065	0.939	0.945	1.61167
52	NCS1_KAN431-1_4.tif:0009-0548	1.551	38.345	0	239	21.326	56.058	0.834	59.485	5675	1.464	0.683	0.911	1.30455
53	NCS1_KAN431-1_4.tif:0010-0550	1.583	4.212	0	20	2.078	56.362	0.963	6.666	636	1.057	0.946	0.959	0.146202
54	NCS1_KAN431-1_4.tif:0011-0568	1.981	36.619	0	389	115.1	58.119	0.877	72.545	6921	1.281	0.781	0.931	1.59098
55	NCS1_KAN431-1_4.tif:0012-0636	2.212	29.507	0	330	45.305	65.139	0.784	65.26	6226	1.786	0.56	0.94	1.43121
56	NCS1_KAN431-1_4.tif:0013-0655	1.499	12.958	0	103	133.249	67.116	0.848	19.423	1853	1.618	0.618	0.914	0.425962
57	NCS1_KAN431-1_4.tif:0014-0659	1.908	35.758	0	326	65.207	67.462	0.748	68.216	6508	1.78	0.562	0.933	1.49604
58	NCS1_KAN431-1_4.tif:0015-0705	1.499	29.098	0	214	56.105	72.159	0.937	43.615	4161	1.24	0.807	0.95	0.956518
59	NCS1_KAN431-1_4.tif:0016-0754	1.143	16.835	0	73	98.321	77.216	0.971	19.234	1835	1.066	0.938	0.965	0.421824
60	NCS1_KAN431-1_4.tif:0017-0944	1.688	18.205	0	189	13.382	96.629	0.886	30.722	2931	1.386	0.721	0.944	0.67377
61	NCS1_KAN431-1_5.tif:0001-0064	1.719	57.5	0	517	85.994	6.59	0.88	98.844	9430	1.026	0.975	0.932	2.16774
62	NCS1_KAN431-1_5.tif:0002-0088	1.95	40.005	0	383	106.546	9.021	0.863	77.996	7441	1.321	0.757	0.914	1.71052
63	NCS1_KAN431-1_5.tif:0003-0108	1.384	11.576	0	77	123.392	11.042	0.977	16.016	1528	1.25	0.8	0.953	0.351252
64	NCS1_KAN431-1_5.tif:0004-0236	1.405	42.604	0	364	29.49	24.178	0.842	59.841	5709	1.542	0.649	0.947	1.31237
65	NCS1_KAN431-1_5.tif:0005-0449	1.551	10.074	0	71	125.538	45.969	0.959	15.628	1491	1.293	0.773	0.943	0.342747
66	NCS1_KAN431-1_5.tif:0006-0571	1.929	22.527	0	236	71.631	58.436	0.945	43.447	4145	1.17	0.854	0.939	0.95284
67	NCS1_KAN431-1_5.tif:0007-0574	1.635	25.686	0	227	28.646	58.847	0.898	42.001	4007	1.057	0.946	0.969	0.921117
68	NCS1_KAN431-1_5.tif:0008-0656	1.918	25.104	0	224	6.449	67.144	0.83	48.154	4594	1.466	0.682	0.922	1.05606
69	NCS1_KAN431-1_5.tif:0009-0680	1.551	42.682	0	317	94.965	69.602	0.934	66.214	6317	1.175	0.851	0.931	1.45213
70	NCS1_KAN431-1_5.tif:0010-0777	1.96	32.241	0	328	30.284	79.542	0.856	63.195	6029	1.142	0.876	0.94	1.38593
71	NCS1_KAN431-1_5.tif:0011-0887	1.446	10.587	0	77	64.619	90.853	0.914	15.314	1461	1.126	0.888	0.952	0.33585
72	NCS1_KAN431-1_5.tif:0012-0912	2.096	26.305	0	305	82.288	93.379	0.817	55.145	5261	1.625	0.615	0.909	1.20938
73	NCS1_KAN431-1_5.tif:0013-0914	1.446	48.688	0	355	127.361	93.589	0.914	70.428	6719	1.077	0.928	0.958	1.54454
74	NCS1_KAN431-1_5.tif:0014-1025	1.646	35.682	0	286	50.445	104.913	0.843	58.719	5602	1.478	0.676	0.913	1.28777
75	NCS1_KAN431-1_6.tif:0001-0183	1.247	10.025	0	47	25.924	18.766	0.973	12.505	1193	1.046	0.956	0.941	0.274243
76	NCS1_KAN431-1_6.tif:0002-0238	1.614	41.675	0	366	27.318	24.361	0.932	67.273	6418	1.207	0.829	0.969	1.47535
77	NCS1_KAN431-1_6.tif:0003-0260	1.887	21.672	0	193	116.723	26.631	0.925	40.89	3901	1.169	0.855	0.928	0.89675
78	NCS1_KAN431-1_6.tif:0004-0360	1.866	38.157	0	374	92.583	36.93	0.902	71.193	6792	1.163	0.86	0.947	1.56133
79	NCS1_KAN431-1_6.tif:0005-0449	1.824	31.287	0	237	49.343	45.94	0.861	57.063	5444	1.466	0.682	0.93	1.25145
80	NCS1_KAN431-1_6.tif:0006-0544	1.562	19.879	0	171	32.431	55.717	0.95	31.047	2962	1.193	0.838	0.955	0.680896
81	NCS1_KAN431-1_6.tif:0007-0548	1.834	53.257	0	452	97.493	56.102	0.953	97.691	9320	1.237	0.809	0.946	2.14245
82	NCS1_KAN431-1_6.tif:0008-0721	1.163	35.27	0	147	20.789	73.874	0.976	41.036	3915	1.108	0.902	0.941	0.899969
83	NCS1_KAN431-1_6.tif:0009-0731	1.541	26.252	0	99	60.901	74.83	0.913	40.449	3859	1.227	0.815	0.945	0.887096
84	NCS1_KAN431-1_6.tif:0010-0872	1.813	26.867	0	290	50.666	89.289	0.907	48.72	4648	1.172	0.853	0.951	1.06847
85	NCS1_KAN431-1_6.tif:0011-0874	1.446	31.116	0	183	123.112	89.503	0.965	45.009	4294	1.106	0.904	0.955	0.987092
86	NCS1_KAN431-1_6.tif:0012-0894	1.709	44.521	0	300	22.123	91.499	0.942	76.067	7257	1.077	0.928	0.934	1.66822
										4350.15				1
87	NCS1_KAN431-2_1.tif:0001-0047	1.572	39.553	0	221	66.914	4.796	0.922	62.189	5933	1.486	0.673	0.946	1.36386
88	NCS1_KAN431-2_1.tif:0002-0141	1.279	43.467	0	317	122.151	14.477	0.913	55.585	5303	1.263	0.792	0.942	1.21904
89	NCS1_KAN431-2_1.tif:0003-0183	1.551	50.757	0	434	105.055	18.736	0.92	78.74	7512	1.225	0.816	0.952	1.72684
90	NCS1_KAN431-2_1.tif:0004-0198	1.394	13.444	0	75	126.949	20.304	0.891	18.742	1788	1.045	0.957	0.964	0.41102
91	NCS1_KAN431-2_1.tif:0005-0208	1.667	26.371	0	240	73.722	21.311	0.776	43.95	4193	1.633	0.612	0.93	0.963875
92	NCS1_KAN431-2_1.tif:0006-0380	1.457	26.209	0	190	87.836	38.988	0.946	38.185	3643	1.089	0.919	0.955	0.837442
93	NCS1_KAN431-2_1.tif:0007-0400	1.394	55.654	0	356	13.381	40.975	0.881	77.587	7402	1.334	0.75	0.94	1.70155
94	NCS1_KAN431-2_1.tif:0008-0490	1.551	15.892	0	116	82.114	50.21	0.864	24.653	2352	1.181	0.846	0.916	0.540671
95	NCS1_KAN431-2_1.tif:0009-0595	1.813	35.474	0	366	108.196	60.892	0.856	64.327	6137	1.323	0.756	0.935	1.41076
96	NCS1_KAN431-2_1.tif:0010-0626	1.646	35.344	0	328	89.485	64.046	0.894	58.164	5549	1.337	0.748	0.946	1.27559
97	NCS1_KAN431-2_1.tif:0011-0666	1.289	27.813	0	179	15.601	68.259	0.948	35.858	3421	1.165	0.859	0.95	0.786409
98	NCS1_KAN431-2_1.tif:0012-0818	1.499	34.441	0	380	39.366	83.781	0.912	51.623	4925	1.176	0.85	0.938	1.13214
99	NCS1_KAN431-2_1.tif:0013-0837	1.855	25	0	263	124.201	85.749	0.876	46.382	4425	1.375	0.727	0.947	1.01721
100	NCS1_KAN431-2_1.tif:0014-0889	1.384	30.235	0	257	29.075	91.044	0.923	41.833	3991	1.229	0.814	0.95	0.917439
101	NCS1_KAN431-2_1.tif:0015-0942	1.698	20.883	0	197	102.601	96.475	0.95	35.46	3383	1.26	0.794	0.92	0.777674
102	NCS1_KAN431-2_1.tif:0016-0952	1.478	36.582	0	309	70.963	97.466	0.949	54.065	5158	1.207	0.828	0.937	1.18571
103	NCS1_KAN431-2_2.tif:0001-0076	1.73	20.158	0	175	2.339	7.774	0.978	34.863	3326	1.099	0.91	0.948	0.764571
104	NCS1_KAN431-2_2.tif:0002-0111	1.709	33.755	0	331	74.777	11.381	0.966	57.671	5502	1.163	0.86	0.948	1.26478
105	NCS1_KAN431-2_2.tif:0003-0248	1.971	13.58	0	60	98.218	25.376	0.759	26.76	2553	1.668	0.6	0.904	0.586876
106	NCS1_KAN431-2_2.tif:0004-0254	1.876	20.358	0	159	53.459	25.952	0.777	38.196	3644	1.603	0.624	0.895	0.837672
107	NCS1_KAN431-2_2.tif:0005-0288	1.583	40.371	0	315	117.911	29.509	0.938	63.897	6096	1.009	0.991	0.956	1.40133
108	NCS1_KAN431-2_2.tif:0006-0442	1.95	40.124	0	272	43.447	45.29	0.956	78.226	7463	1.184	0.844	0.944	1.71557
109	NCS1_KAN431-2_2.tif:0007-0590	1.226	20.949	0	162	7.536	60.379	0.968	25.691	2451	1.158	0.863	0.959	0.563429
110	NCS1_KAN431-2_2.tif:0008-0715	1.646	26.414	0	219	130.38	73.212	0.872	43.468	4147	1.328	0.753	0.96	0.9533
111	NCS1_KAN431-2_2.tif:0009-0776	1.405	12.918	0	115	2.389	79.428	0.937	18.144	1731	1.12	0.893	0.944	0.397917
112	NCS1_KAN431-2_2.tif:0010-0786	1.803	28.471	0	281	30.198	80.465	0.832	51.33	4897	1.522	0.657	0.932	1.12571
113	NCS1_KAN431-2_2.tif:0011-0889	1.446	28.145	0	219	18.216	91.017	0.924	40.712	3884	1.069	0.935	0.982	0.892843
114	NCS1_KAN431-2_2.tif:0012-0941	1.331	23.693	0	158	85.145	96.392	0.924	31.54	3009	1.157	0.864	0.951	0.6917
115	NCS1_KAN431-2_3.tif:0001-0018	1.331	16.827	0	119	135.999	1.895	0.979	22.4	2137	1.18	0.848	0.958	0.491247
116	NCS1_KAN431-2_3.tif:0002-0024	1.698	34.13	0	310	123.034	2.429	0.913	57.954	5529	1.162	0.86	0.95	1.27099
117	NCS1_KAN431-2_3.tif:0003-0041	1.855	36.893	0	274	108.946	4.22	0.888	68.447	6530	1.245	0.803	0.922	1.5011
118	NCS1_KAN431-2_3.tif:0004-0061	1.426	39.059	0	204	56.999	6.29	0.951	55.68	5312	1.143	0.875	0.954	1.22111
119	NCS1_KAN431-2_3.tif:0005-0196	1.981	29.683	0	243	75.157	20.082	0.885	58.803	5610	1.25	0.8	0.945	1.28961
120	NCS1_KAN431-2_3.tif:0006-0224	1.771	29.899	0	237	116.521	22.938	0.93	52.965	5053	1.17	0.855	0.955	1.16157
121	NCS1_KAN431-2_3.tif:0007-0259	1.551	18.865	0	179	95.265	26.584	0.969	29.265	2792	1.083	0.923	0.952	0.641817
122	NCS1_KAN431-2_3.tif:0008-0292	1.593	16.52	0	117	43.917	29.874	0.944	26.32	2511	1.171	0.854	0.962	0.577221
123	NCS1_KAN431-2_3.tif:0009-0307	1.73	25.164	0	221	116.495	31.531	0.908	43.521	4152	1.236	0.809	0.943	0.95445
124	NCS1_KAN431-2_3.tif:0010-0317	1.667	28.314	0	308	15.799	32.492	0.845	47.189	4502	1.52	0.658	0.914	1.03491
125	NCS1_KAN431-2_3.tif:0011-0342	1.509	24.375	0	169	141.149	35.069	0.969	36.791	3510	1.044	0.958	0.95	0.806869
126	NCS1_KAN431-2_3.tif:0012-0516	1.635	22.314	0	194	37.544	52.836	0.911	36.487	3481	1.321	0.757	0.945	0.800202
127	NCS1_KAN431-2_3.tif:0013-0537	1.604	20.458	0	195	97.745	55.026	0.926	32.808	3130	1.104	0.905	0.956	0.719515
128	NCS1_KAN431-2_3.tif:0014-0636	1.446	20.812	0	129	74.036	65.194	0.965	30.104	2872	1.118	0.894	0.955	0.660207
129	NCS1_KAN431-2_3.tif:0015-0735	1.53	17.329	0	123	61.691	75.282	0.907	26.519	2530	1.121	0.892	0.942	0.581589
130	NCS1_KAN431-2_3.tif:0016-0886	1.415	26.067	0	262	45.9	90.707	0.848	36.886	3519	1.333	0.75	0.938	0.808937
131	NCS1_KAN431-2_3.tif:0017-0922	1.509	12.472	0	194	8.434	94.457	0.82	18.825	1796	1.508	0.663	0.923	0.412859
132	NCS1_KAN431-2_4.tif:0001-0141	1.09	8.481	0	27	11.525	14.482	0.956	9.245	882	1.213	0.824	0.95	0.202752
133	NCS1_KAN431-2_4.tif:0002-0154	1.53	17.932	0	120	105.923	15.807	0.982	27.442	2618	1.018	0.982	0.954	0.601818
134	NCS1_KAN431-2_4.tif:0003-0158	1.688	11.478	0	55	27.972	16.226	0.898	19.37	1848	1.254	0.797	0.923	0.424813
135	NCS1_KAN431-2_4.tif:0004-0186	1.709	29.264	0	279	75.329	19.113	0.875	49.998	4770	1.35	0.741	0.934	1.09651
136	NCS1_KAN431-2_4.tif:0005-0329	1.122	9.729	0	52	3.73	33.685	0.924	10.912	1041	1.216	0.822	0.96	0.239302
137	NCS1_KAN431-2_4.tif:0006-0416	1.719	12.53	0	150	58.19	42.638	0.902	21.54	2055	1.306	0.766	0.951	0.472397
138	NCS1_KAN431-2_4.tif:0007-0434	1.918	16.902	0	217	131.897	44.468	0.823	32.42	3093	1.759	0.569	0.92	0.71101
139	NCS1_KAN431-2_4.tif:0008-0439	1.111	13.425	0	142	92.294	44.992	0.975	14.916	1423	1.019	0.982	0.951	0.327115
140	NCS1_KAN431-2_4.tif:0009-0490	1.625	37.065	0	397	31.577	50.186	0.953	60.218	5745	1.322	0.756	0.951	1.32064
141	NCS1_KAN431-2_4.tif:0010-0523	1.279	7.213	0	33	98.639	53.514	0.924	9.224	880	1.122	0.891	0.972	0.202292
142	NCS1_KAN431-2_4.tif:0011-0720	1.405	18.731	0	70	27.583	73.703	0.964	26.309	2510	1.134	0.882	0.95	0.576991
143	NCS1_KAN431-2_4.tif:0012-0740	1.216	26.043	0	156	141.766	75.801	0.916	31.666	3021	1.054	0.949	0.983	0.694459
144	NCS1_KAN431-2_4.tif:0013-0860	1.509	30.826	0	165	29.361	88.033	0.895	46.529	4439	1.193	0.838	0.932	1.02042
145	NCS1_KAN431-2_4.tif:0014-0898	1.971	31.564	0	230	104.489	91.986	0.88	62.199	5934	1.286	0.778	0.935	1.36409
146	NCS1_KAN431-2_4.tif:0015-0946	1.467	26.8	0	247	57.006	96.88	0.917	39.328	3752	1.14	0.877	0.933	0.862499
147	NCS1_KAN431-2_5.tif:0001-0019	1.803	34.012	0	266	52.129	1.971	0.914	61.319	5850	1.116	0.896	0.932	1.34478
148	NCS1_KAN431-2_5.tif:0002-0046	1.677	38.125	0	238	106.037	4.695	0.959	63.939	6100	1.062	0.941	0.961	1.40225
149	NCS1_KAN431-2_5.tif:0003-0177	1.646	20.306	0	195	139.287	18.119	0.872	33.416	3188	1.251	0.8	0.943	0.732848
150	NCS1_KAN431-2_5.tif:0004-0198	1.782	26.041	0	288	41.585	20.217	0.903	46.403	4427	1.264	0.791	0.934	1.01767
151	NCS1_KAN431-2_5.tif:0005-0218	1.646	30.261	0	278	32.676	22.312	0.885	49.799	4751	1.331	0.751	0.924	1.09215
152	NCS1_KAN431-2_5.tif:0006-0340	1.583	26.225	0	249	81.536	34.868	0.86	41.508	3960	1.131	0.884	0.926	0.910313
153	NCS1_KAN431-2_5.tif:0007-0396	1.436	12.292	0	55	27.852	40.583	0.958	17.651	1684	1.099	0.91	0.951	0.387113
154	NCS1_KAN431-2_5.tif:0008-0438	1.646	11.586	0	64	111.134	44.897	0.931	19.067	1819	1.166	0.858	0.924	0.418146
155	NCS1_KAN431-2_5.tif:0009-0513	1.331	19.37	0	153	83.11	52.52	0.924	25.785	2460	1.014	0.986	0.944	0.565498
156	NCS1_KAN431-2_5.tif:0010-0625	1.52	21.807	0	154	8.399	63.974	0.925	33.144	3162	1.176	0.851	0.945	0.726871
157	NCS1_KAN431-2_5.tif:0011-0651	1.394	23.346	0	211	137.913	66.68	0.941	32.546	3105	1.041	0.961	0.967	0.713768
158	NCS1_KAN431-2_5.tif:0012-0797	1.237	9.144	0	33	43.921	81.644	0.976	11.31	1079	1.07	0.935	0.959	0.248037
159	NCS1_KAN431-2_5.tif:0013-0975	1.53	13.856	0	77	105.163	99.855	0.921	21.205	2023	1.101	0.908	0.933	0.465041
160	NCS1_KAN431-2_6.tif:0001-0052	1.436	22.401	0	163	16.903	5.29	0.907	32.169	3069	1.294	0.773	0.965	0.705493
161	NCS1_KAN431-2_6.tif:0002-0121	1.488	21.592	0	197	57.66	12.396	0.916	32.137	3066	1.087	0.92	0.963	0.704803
162	NCS1_KAN431-2_6.tif:0003-0143	1.499	22.993	0	235	138.091	14.611	0.937	34.464	3288	1.179	0.848	0.947	0.755836
163	NCS1_KAN431-2_6.tif:0004-0173	1.394	27.226	0	229	21.634	17.711	0.957	37.955	3621	1.286	0.778	0.953	0.832385
164	NCS1_KAN431-2_6.tif:0005-0227	1.153	14.6	0	75	86.881	23.25	0.922	16.834	1606	1.048	0.954	0.969	0.369183
165	NCS1_KAN431-2_6.tif:0006-0348	1.635	5.66	0	89	128.695	35.658	0.949	9.255	883	1.091	0.917	0.926	0.202981
166	NCS1_KAN431-2_6.tif:0007-0414	1.834	26.514	0	241	53.278	42.427	0.838	48.636	4640	1.209	0.827	0.907	1.06663
167	NCS1_KAN431-2_6.tif:0008-0549	1.509	17.826	0	230	85.977	56.174	0.919	26.907	2567	1.196	0.836	0.95	0.590094
168	NCS1_KAN431-2_6.tif:0009-0601	1.656	12.323	0	116	118.357	61.545	0.9	20.408	1947	1.249	0.8	0.949	0.447571
169	NCS1_KAN431-2_6.tif:0010-0615	1.541	17.286	0	114	12.984	62.973	0.938	26.634	2541	1.197	0.836	0.951	0.584118
170	NCS1_KAN431-2_6.tif:0011-0661	1.698	22.605	0	175	50.615	67.661	0.985	38.385	3662	1.182	0.846	0.95	0.84181
171	NCS1_KAN431-2_6.tif:0012-0723	1.499	15.329	0	136	101.879	73.986	0.912	22.976	2192	1.255	0.797	0.953	0.503891
172	NCS1_KAN431-2_6.tif:0013-0791	1.771	8.864	0	48	73.874	81.01	0.93	15.702	1498	1.2	0.833	0.955	0.344356
173	NCS1_KAN431-2_6.tif:0014-0894	1.405	31.358	0	198	46.997	91.539	0.948	44.045	4202	1.132	0.884	0.971	0.965943
										3622.82				0.832802
174	NCS1_KAN431-3_1.tif:0001-0036	1.792	39.246	0	342	53.234	3.754	0.846	70.344	6711	1.475	0.678	0.932	1.54271
175	NCS1_KAN431-3_1.tif:0002-0158	1.405	22.888	0	190	103.493	16.244	0.902	32.148	3067	1.365	0.733	0.921	0.705033
176	NCS1_KAN431-3_1.tif:0003-0184	1.824	36.753	0	317	17.94	18.792	0.842	67.031	6395	1.334	0.75	0.935	1.47006
177	NCS1_KAN431-3_1.tif:0004-0362	1.782	34.512	0	330	73.59	37.1	0.935	61.497	5867	1.288	0.777	0.955	1.34869
178	NCS1_KAN431-3_1.tif:0005-0392	1.551	51.824	0	391	44.353	40.18	0.92	80.396	7670	1.161	0.862	0.952	1.76316
179	NCS1_KAN431-3_1.tif:0006-0634	1.698	35.321	0	326	107.145	64.938	0.87	59.977	5722	1.043	0.959	0.926	1.31536
180	NCS1_KAN431-3_1.tif:0007-0670	1.551	40.236	0	380	45.578	68.653	0.934	62.419	5955	1.075	0.93	0.928	1.36892
181	NCS1_KAN431-3_1.tif:0008-0828	1.667	38.321	0	436	74.62	84.859	0.862	63.866	6093	1.453	0.688	0.955	1.40064
182	NCS1_KAN431-3_1.tif:0009-0838	1.75	11.515	0	92	105.057	85.76	0.838	20.157	1923	1.562	0.64	0.91	0.442054
183	NCS1_KAN431-3_1.tif:0010-0862	1.73	26.788	0	234	127.265	88.238	0.93	46.33	4420	1.02	0.981	0.938	1.01606
184	NCS1_KAN431-3_2.tif:0001-0132	1.216	28.19	0	188	84.753	13.57	0.96	34.276	3270	1.203	0.831	0.951	0.751698
185	NCS1_KAN431-3_2.tif:0002-0224	1.646	32.433	0	240	98.848	22.942	0.851	53.374	5092	1.721	0.581	0.963	1.17053
186	NCS1_KAN431-3_2.tif:0003-0251	1.614	49.266	0	398	17.317	25.749	0.972	79.526	7587	1.128	0.887	0.948	1.74408
187	NCS1_KAN431-3_2.tif:0004-0343	1.373	21.802	0	105	111.706	35.105	0.927	29.936	2856	1.053	0.95	0.96	0.656529
188	NCS1_KAN431-3_2.tif:0005-0464	1.803	38.738	0	304	115.497	47.508	0.901	69.841	6663	1.345	0.744	0.956	1.53167
189	NCS1_KAN431-3_2.tif:0006-0496	1.572	57.28	0	456	16.845	50.85	0.932	90.06	8592	1.069	0.936	0.955	1.9751
190	NCS1_KAN431-3_2.tif:0007-0502	1.426	21.919	0	105	64.848	51.366	0.845	31.246	2981	1.206	0.83	0.919	0.685264
191	NCS1_KAN431-3_2.tif:0008-0590	1.646	52.248	0	472	83.744	60.393	0.894	85.983	8203	1.113	0.898	0.954	1.88568
192	NCS1_KAN431-3_2.tif:0009-0741	1.782	25.294	0	180	34.988	75.888	0.926	45.072	4300	1.273	0.786	0.929	0.988471
193	NCS1_KAN431-3_2.tif:0010-0746	1.635	45.385	0	329	100.045	76.425	0.911	74.212	7080	1.129	0.886	0.945	1.62753
194	NCS1_KAN431-3_2.tif:0011-0871	1.782	27.159	0	158	112.148	89.186	0.861	48.395	4617	1.056	0.947	0.921	1.06134
195	NCS1_KAN431-3_2.tif:0012-0916	1.415	16.793	0	147	9.808	93.798	0.919	23.762	2267	1.099	0.91	0.938	0.521131
196	NCS1_KAN431-3_2.tif:0013-1001	1.667	43.484	0	449	43.337	102.502	0.919	72.472	6914	1.195	0.837	0.93	1.58937
197	NCS1_KAN431-3_3.tif:0001-0088	1.845	41.403	0	392	106.972	9.007	0.771	76.381	7287	1.496	0.669	0.889	1.67511
198	NCS1_KAN431-3_3.tif:0002-0092	1.992	30.568	0	349	36.993	9.421	0.818	60.879	5808	1.374	0.728	0.888	1.33513
199	NCS1_KAN431-3_3.tif:0003-0103	1.834	25.314	0	237	141.443	10.581	0.838	46.435	4430	1.478	0.677	0.916	1.01836
200	NCS1_KAN431-3_3.tif:0004-0242	1.75	47.707	0	512	76.976	24.864	0.919	83.509	7967	1.19	0.84	0.952	1.83143
201	NCS1_KAN431-3_3.tif:0005-0260	1.876	34.754	0	336	65.109	26.619	0.858	65.208	6221	1.439	0.695	0.937	1.43007
202	NCS1_KAN431-3_3.tif:0006-0295	1.499	13.783	0	95	56.625	30.166	0.937	20.66	1971	1.172	0.853	0.947	0.453088
203	NCS1_KAN431-3_3.tif:0007-0414	1.488	41.993	0	296	103.474	42.379	0.916	62.503	5963	1.064	0.94	0.959	1.37076
204	NCS1_KAN431-3_3.tif:0008-0451	1.53	32.774	0	310	135.899	46.191	0.792	50.156	4785	1.421	0.704	0.896	1.09996
205	NCS1_KAN431-3_3.tif:0009-0500	1.677	44.25	0	347	23.76	51.238	0.889	74.212	7080	1.367	0.731	0.961	1.62753
206	NCS1_KAN431-3_3.tif:0010-0587	1.3	30.847	0	194	35.956	60.084	0.955	40.093	3825	1.099	0.91	0.95	0.87928
207	NCS1_KAN431-3_3.tif:0011-0657	1.876	28.57	0	224	86.707	67.283	0.878	53.604	5114	1.247	0.802	0.925	1.17559
208	NCS1_KAN431-3_3.tif:0012-0766	1.53	15.664	0	118	51.622	78.452	0.921	23.972	2287	1.282	0.78	0.93	0.525729
209	NCS1_KAN431-3_3.tif:0013-0901	1.562	31.832	0	309	97.641	92.341	0.95	49.715	4743	1.044	0.958	0.958	1.09031
210	NCS1_KAN431-3_4.tif:0001-0017	1.3	39.234	0	303	10.475	1.783	0.877	50.994	4865	1.058	0.945	0.939	1.11835
211	NCS1_KAN431-3_4.tif:0002-0167	1.384	40.735	0	302	114.824	17.075	0.923	56.361	5377	1.106	0.904	0.936	1.23605
212	NCS1_KAN431-3_4.tif:0003-0168	1.363	31.685	0	206	63.833	17.206	0.909	43.175	4119	1.197	0.835	0.925	0.946864
213	NCS1_KAN431-3_4.tif:0004-0280	1.541	37.646	0	339	136.32	28.711	0.963	58.007	5534	1.109	0.902	0.955	1.27214
214	NCS1_KAN431-3_4.tif:0005-0302	1.122	9.477	0	80	57.61	30.942	0.924	10.629	1014	1.029	0.972	0.947	0.233095
215	NCS1_KAN431-3_4.tif:0006-0334	2.138	40.799	0	348	91.511	34.227	0.731	87.241	8323	1.95	0.513	0.881	1.91327
216	NCS1_KAN431-3_4.tif:0007-0355	1.562	39.906	0	316	96.039	36.399	0.808	62.325	5946	1.331	0.752	0.914	1.36685
217	NCS1_KAN431-3_4.tif:0008-0375	1.3	20.718	0	119	120.76	38.386	0.939	26.928	2569	1.139	0.878	0.973	0.590554
218	NCS1_KAN431-3_4.tif:0009-0536	1.132	18.111	0	271	4.201	54.872	0.894	20.503	1956	1.143	0.875	0.923	0.44964
219	NCS1_KAN431-3_4.tif:0010-0551	1.101	13.648	0	161	136.408	56.422	0.919	15.021	1433	1.084	0.922	0.977	0.329414
220	NCS1_KAN431-3_4.tif:0011-0566	1.342	46.398	0	257	59.395	57.947	0.871	62.252	5939	1.291	0.774	0.938	1.36524
221	NCS1_KAN431-3_4.tif:0012-0694	1.782	31.129	0	201	109.593	71.058	0.842	55.47	5292	1.405	0.712	0.924	1.21651
222	NCS1_KAN431-3_4.tif:0013-0700	1.834	35.24	0	271	31.105	71.677	0.777	64.642	6167	1.436	0.696	0.873	1.41765
223	NCS1_KAN431-3_4.tif:0014-0863	1.981	33.386	0	356	70.392	88.471	0.803	66.141	6310	1.438	0.695	0.913	1.45052
224	NCS1_KAN431-3_4.tif:0015-0912	1.488	36.599	0	324	46.645	93.426	0.982	54.474	5197	1.065	0.939	0.944	1.19467
225	NCS1_KAN431-3_4.tif:0016-0961	1.95	38.328	0	399	102.198	98.508	0.852	74.725	7129	1.166	0.857	0.928	1.63879
226	NCS1_KAN431-3_5.tif:0001-0048	1.761	35.167	0	332	9.339	4.915	0.872	61.927	5908	1.288	0.776	0.936	1.35811
227	NCS1_KAN431-3_5.tif:0002-0168	1.384	20.561	0	133	28.942	17.194	0.949	28.448	2714	1.125	0.889	0.94	0.623886
228	NCS1_KAN431-3_5.tif:0003-0385	1.604	18.752	0	176	80.012	39.402	0.917	30.072	2869	1.311	0.763	0.947	0.659517
229	NCS1_KAN431-3_5.tif:0004-0400	1.834	33.674	0	349	21.2	40.992	0.866	61.77	5893	1.662	0.602	0.951	1.35467
230	NCS1_KAN431-3_5.tif:0005-0457	1.771	35.391	0	353	132.117	46.753	0.877	62.692	5981	1.32	0.757	0.926	1.37489
231	NCS1_KAN431-3_5.tif:0006-0479	1.593	29.928	0	311	37.073	49.096	0.959	47.682	4549	1.086	0.921	0.935	1.04571
232	NCS1_KAN431-3_5.tif:0007-0677	1.593	19.993	0	190	1.796	69.302	0.857	31.854	3039	1.386	0.722	0.907	0.698596
233	NCS1_KAN431-3_5.tif:0008-0684	1.457	33.022	0	224	113.277	70.037	0.901	48.112	4590	1.179	0.848	0.908	1.05514
234	NCS1_KAN431-3_5.tif:0009-0717	1.101	10	0	58	73.873	73.397	0.919	11.006	1050	1.105	0.905	0.977	0.241371
235	NCS1_KAN431-3_5.tif:0010-0734	1.53	31	0	293	23.907	75.136	0.907	47.441	4526	1.214	0.824	0.948	1.04042
236	NCS1_KAN431-3_5.tif:0011-0840	1.363	15.662	0	92	47.643	85.978	0.935	21.341	2036	1.297	0.771	0.935	0.46803
237	NCS1_KAN431-3_6.tif:0001-0050	1.897	51.061	0	397	63.555	5.231	0.875	96.873	9242	1.423	0.703	0.953	2.12452
238	NCS1_KAN431-3_6.tif:0002-0092	1.572	40.873	0	330	121.219	9.368	0.908	64.264	6131	1.187	0.842	0.962	1.40938
239	NCS1_KAN431-3_6.tif:0003-0317	1.3	32	0	287	11.245	32.484	0.955	41.592	3968	1.161	0.861	0.954	0.912152
240	NCS1_KAN431-3_6.tif:0004-0335	1.792	45.035	0	418	103.321	34.338	0.896	80.721	7701	1.349	0.741	0.958	1.77028
241	NCS1_KAN431-3_6.tif:0005-0492	2.033	38.51	0	473	89.374	50.405	0.88	78.31	7471	1.09	0.918	0.928	1.71741
242	NCS1_KAN431-3_6.tif:0006-0545	1.572	29.633	0	228	12.733	55.787	0.899	46.592	4445	1.137	0.879	0.923	1.0218
243	NCS1_KAN431-3_6.tif:0007-0579	1.75	42.15	0	292	45.245	59.299	0.896	73.782	7039	1.416	0.706	0.949	1.6181
244	NCS1_KAN431-3_6.tif:0008-0704	1.625	35.606	0	348	48.544	72.096	0.905	57.849	5519	1.14	0.877	0.942	1.26869
245	NCS1_KAN431-3_6.tif:0009-0775	1.583	30.066	0	264	120.181	79.392	0.905	47.588	4540	1.42	0.704	0.944	1.04364
246	NCS1_KAN431-3_6.tif:0010-0800	1.698	31.568	0	329	91.506	81.932	0.923	53.604	5114	1.226	0.815	0.959	1.17559
247	NCS1_KAN431-3_6.tif:0011-0944	1.719	34.274	0	255	18.497	96.729	0.859	58.919	5621	1.192	0.839	0.929	1.29214
										5119.49				1.17685
248	NCS1_KAN431-4_1.tif:0001-0049	1.488	34.866	0	297	16.397	5.008	0.956	51.896	4951	1.182	0.846	0.94	1.13812
249	NCS1_KAN431-4_1.tif:0002-0099	1.75	52.856	0	448	34.566	10.148	0.855	92.523	8827	1.585	0.631	0.96	2.02912
250	NCS1_KAN431-4_1.tif:0003-0132	1.52	45.248	0	371	118.933	13.575	0.856	68.771	6561	1.331	0.751	0.957	1.50822
251	NCS1_KAN431-4_1.tif:0004-0166	2.411	37.891	0	480	59.017	17.096	0.731	91.349	8715	1.643	0.609	0.868	2.00338
252	NCS1_KAN431-4_1.tif:0005-0283	1.635	51.859	0	391	87.136	29.03	0.959	84.798	8090	1.118	0.894	0.948	1.85971
253	NCS1_KAN431-4_1.tif:0006-0298	1.698	49.346	0	435	31.494	30.546	0.923	83.792	7994	1.137	0.88	0.959	1.83764
254	NCS1_KAN431-4_1.tif:0007-0458	1.75	43.629	0	363	62.583	46.902	0.941	76.371	7286	1.185	0.844	0.954	1.67488
255	NCS1_KAN431-4_1.tif:0008-0507	1.771	39.68	0	418	6.85	51.977	0.837	70.291	6706	1.429	0.7	0.923	1.54156
256	NCS1_KAN431-4_1.tif:0009-0530	1.688	32.441	0	265	35.949	54.295	0.954	54.747	5223	1.337	0.748	0.95	1.20065
257	NCS1_KAN431-4_1.tif:0010-0637	1.876	42.615	0	402	91.854	65.34	0.858	79.956	7628	1.206	0.83	0.909	1.7535
258	NCS1_KAN431-4_1.tif:0011-0651	1.981	47.36	0	508	123.557	66.703	0.948	93.823	8951	1.234	0.811	0.957	2.05763
259	NCS1_KAN431-4_1.tif:0012-0751	1.929	50.386	0	416	59.2	76.899	0.923	97.177	9271	1.197	0.835	0.944	2.13119
260	NCS1_KAN431-4_1.tif:0013-0877	1.279	39.697	0	199	4.089	89.813	0.863	50.764	4843	1.042	0.96	0.924	1.11329
261	NCS1_KAN431-4_1.tif:0014-0896	1.342	33.156	0	198	139.987	91.735	1	44.485	4244	1.109	0.901	0.945	0.975598
262	NCS1_KAN431-4_1.tif:0015-1026	1.405	28.746	0	211	30.094	105.102	0.912	40.376	3852	1.187	0.843	0.944	0.885486
263	NCS1_KAN431-4_2.tif:0001-0035	1.541	44	0	414	26.889	3.635	0.913	67.797	6468	1.126	0.888	0.942	1.48684
264	NCS1_KAN431-4_2.tif:0002-0218	1.384	38.038	0	298	40.507	22.405	0.874	52.629	5021	1.316	0.76	0.94	1.15421
265	NCS1_KAN431-4_2.tif:0003-0256	1.614	25.318	0	182	97.097	26.255	0.899	40.869	3899	1.097	0.912	0.928	0.896291
266	NCS1_KAN431-4_2.tif:0004-0356	1.3	28.952	0	106	13.549	36.512	0.955	37.63	3590	1.182	0.846	0.954	0.825259
267	NCS1_KAN431-4_2.tif:0005-0404	1.782	46.135	0	313	114.416	41.411	0.882	82.209	7843	1.152	0.868	0.912	1.80293
268	NCS1_KAN431-4_2.tif:0006-0448	1.782	41.335	0	412	79.939	45.953	0.882	73.656	7027	1.071	0.933	0.919	1.61535
269	NCS1_KAN431-4_2.tif:0007-0502	1.363	47.677	0	341	24.842	51.442	0.92	64.967	6198	1.215	0.823	0.959	1.42478
270	NCS1_KAN431-4_2.tif:0008-0599	1.688	37.466	0	297	46.294	61.372	0.917	63.227	6032	1.243	0.805	0.955	1.38662
271	NCS1_KAN431-4_2.tif:0009-0611	1.656	38.665	0	342	102.753	62.607	0.891	64.034	6109	1.436	0.696	0.943	1.40432
272	NCS1_KAN431-4_2.tif:0010-0658	1.52	35.441	0	345	126.603	67.355	0.878	53.866	5139	1.286	0.777	0.935	1.18134
273	NCS1_KAN431-4_2.tif:0011-0666	1.834	46.789	0	491	82.004	68.185	0.93	85.825	8188	1.156	0.865	0.949	1.88223
274	NCS1_KAN431-4_2.tif:0012-0782	1.3	33.613	0	265	6.928	80.065	0.928	43.688	4168	1.052	0.95	0.943	0.958128
275	NCS1_KAN431-4_2.tif:0013-0787	1.73	32.273	0	267	31.148	80.62	0.865	55.816	5325	1.078	0.927	0.938	1.2241
276	NCS1_KAN431-4_2.tif:0014-0851	1.499	37.035	0	263	104.005	87.194	0.989	55.512	5296	1.003	0.997	0.95	1.21743
277	NCS1_KAN431-4_2.tif:0015-0862	1.446	29.051	0	261	76.027	88.275	0.939	42.022	4009	1.131	0.884	0.952	0.921577
278	NCS1_KAN431-4_2.tif:0016-0883	1.499	37.51	0	245	57.511	90.448	0.898	56.225	5364	1.097	0.911	0.966	1.23306
279	NCS1_KAN431-4_2.tif:0017-0914	1.363	50.392	0	334	132.415	93.594	0.861	68.667	6551	1.335	0.749	0.935	1.50592
280	NCS1_KAN431-4_3.tif:0001-0052	1.268	12.537	0	67	38.673	5.384	0.917	15.901	1517	1.142	0.876	0.96	0.348724
281	NCS1_KAN431-4_3.tif:0002-0087	1.709	43.098	0	257	119.514	8.963	0.875	73.635	7025	1.455	0.687	0.937	1.61489
282	NCS1_KAN431-4_3.tif:0003-0232	2.033	48.186	0	533	81.003	23.735	0.842	97.984	9348	1.659	0.603	0.935	2.14889
283	NCS1_KAN431-4_3.tif:0004-0338	1.761	44.125	0	406	97.654	34.617	0.915	77.702	7413	1.289	0.776	0.933	1.70408
284	NCS1_KAN431-4_3.tif:0005-0339	1.719	50.622	0	371	107.531	34.753	0.902	87.02	8302	1.087	0.92	0.937	1.90844
285	NCS1_KAN431-4_3.tif:0006-0358	2.002	34.455	0	239	21.777	36.608	0.812	68.981	6581	1.025	0.976	0.905	1.51282
286	NCS1_KAN431-4_3.tif:0007-0426	2.149	41.498	0	363	133.128	43.616	0.845	89.169	8507	1.272	0.786	0.923	1.95556
287	NCS1_KAN431-4_3.tif:0008-0555	2.275	31.922	0	309	123.952	56.79	0.826	72.608	6927	1.482	0.675	0.906	1.59236
288	NCS1_KAN431-4_3.tif:0009-0555	1.593	38.25	0	330	68.165	56.821	0.888	60.942	5814	1.085	0.922	0.933	1.33651
289	NCS1_KAN431-4_3.tif:0010-0756	1.268	21.678	0	128	98.741	77.481	0.932	27.494	2623	1.165	0.858	0.934	0.602968
290	NCS1_KAN431-4_3.tif:0011-0778	1.237	31.949	0	171	30.921	79.715	0.948	39.517	3770	1.203	0.831	0.952	0.866637
291	NCS1_KAN431-4_3.tif:0012-0797	1.405	34.022	0	215	105.24	81.685	0.937	47.787	4559	1.145	0.873	0.947	1.04801
292	NCS1_KAN431-4_3.tif:0013-0850	1.981	36.608	0	306	123.514	87.03	0.846	72.524	6919	1.396	0.716	0.94	1.59052
293	NCS1_KAN431-4_3.tif:0014-0954	1.541	26.102	0	225	41.001	97.65	0.928	40.219	3837	1.282	0.78	0.945	0.882038
294	NCS1_KAN431-4_4.tif:0001-0108	1.677	52.619	0	456	109.875	11.048	0.868	88.247	8419	1.508	0.663	0.958	1.93534
295	NCS1_KAN431-4_4.tif:0002-0136	1.803	34.727	0	398	69.388	13.921	0.914	62.608	5973	1.307	0.765	0.94	1.37306
296	NCS1_KAN431-4_4.tif:0003-0254	1.604	50.242	0	477	63.193	26.024	0.926	80.574	7687	1.164	0.859	0.968	1.76707
297	NCS1_KAN431-4_4.tif:0004-0314	1.698	51.469	0	339	16.229	32.205	0.913	87.398	8338	1.206	0.829	0.928	1.91672
298	NCS1_KAN431-4_4.tif:0005-0399	1.247	48.084	0	254	107.546	40.846	0.928	59.977	5722	1.365	0.732	0.964	1.31536
299	NCS1_KAN431-4_4.tif:0006-0475	1.499	90.643	0	451	11.21	48.631	0.898	135.866	12962	1.192	0.839	0.96	2.97967
300	NCS1_KAN431-4_4.tif:0007-0603	1.394	44.842	0	238	97.572	61.752	0.93	62.514	5964	1.115	0.897	0.943	1.37099
301	NCS1_KAN431-4_4.tif:0008-0692	1.635	43.776	0	264	137.635	70.894	0.969	71.581	6829	1.043	0.959	0.969	1.56983
302	NCS1_KAN431-4_4.tif:0009-0701	1.698	54.093	0	456	78.354	71.742	0.971	91.853	8763	1.075	0.93	0.961	2.01441
303	NCS1_KAN431-4_4.tif:0010-0799	1.646	36.287	0	332	125.825	81.888	0.864	59.715	5697	1.258	0.795	0.915	1.30961
304	NCS1_KAN431-4_4.tif:0011-0836	1.614	36.188	0	328	100.998	85.667	0.923	58.415	5573	1.191	0.84	0.942	1.2811
305	NCS1_KAN431-4_5.tif:0001-0069	1.384	51.098	0	412	118.489	7.08	0.934	70.7	6745	1.185	0.844	0.974	1.55052
306	NCS1_KAN431-4_5.tif:0002-0073	1.771	39.905	0	320	31.219	7.548	0.907	70.69	6744	1.287	0.777	0.958	1.55029
307	NCS1_KAN431-4_5.tif:0003-0116	1.132	17.287	0	58	76.701	11.881	0.933	19.57	1867	1.197	0.836	0.956	0.42918
308	NCS1_KAN431-4_5.tif:0004-0183	1.059	9.911	0	46	62.545	18.756	0.941	10.492	1001	1.145	0.873	0.971	0.230107
309	NCS1_KAN431-4_5.tif:0005-0198	1.499	59.643	0	381	35.223	20.326	0.947	89.4	8529	1.297	0.771	0.969	1.96062
310	NCS1_KAN431-4_5.tif:0006-0217	1.75	29.323	0	306	116.979	22.173	0.875	51.33	4897	1.472	0.68	0.957	1.12571
311	NCS1_KAN431-4_5.tif:0007-0259	1.604	37.784	0	282	137.465	26.454	0.894	60.596	5781	1.178	0.849	0.939	1.32892
312	NCS1_KAN431-4_5.tif:0008-0261	1.583	70.199	0	449	85.16	26.798	0.928	111.108	10600	1.132	0.884	0.929	2.4367
313	NCS1_KAN431-4_5.tif:0009-0381	1.824	33.615	0	340	47.757	39.046	0.882	61.308	5849	1.104	0.906	0.928	1.34455
314	NCS1_KAN431-4_5.tif:0010-0418	1.331	28.701	0	211	27.135	42.866	0.913	38.206	3645	1.37	0.73	0.937	0.837902
315	NCS1_KAN431-4_5.tif:0011-0429	1.719	46.5	0	402	31.882	43.896	0.938	79.935	7626	1.07	0.935	0.934	1.75304
316	NCS1_KAN431-4_5.tif:0012-0456	1.845	23.21	0	145	94.347	46.744	0.855	42.818	4085	1.474	0.678	0.907	0.939048
317	NCS1_KAN431-4_5.tif:0013-0588	1.352	54.341	0	270	133.841	60.227	0.966	73.478	7010	1.029	0.972	0.963	1.61144
318	NCS1_KAN431-4_5.tif:0014-0617	1.363	30.608	0	181	71.916	63.202	0.962	41.707	3979	1.155	0.866	0.942	0.914681
319	NCS1_KAN431-4_5.tif:0015-0720	1.457	41.043	0	310	99.044	73.712	0.972	59.799	5705	1.109	0.902	0.955	1.31145
320	NCS1_KAN431-4_5.tif:0016-0779	1.614	18.006	0	179	48.617	79.773	0.877	29.066	2773	1.223	0.818	0.942	0.637449
321	NCS1_KAN431-4_5.tif:0017-0836	1.048	12.74	0	50	128.196	85.65	0.932	13.354	1274	1.144	0.874	0.957	0.292863
322	NCS1_KAN431-4_5.tif:0018-0892	1.394	15.203	0	83	27.597	91.344	0.905	21.194	2022	1.474	0.678	0.953	0.464811
323	NCS1_KAN431-4_5.tif:0019-0903	1.247	18.555	0	180	63.357	92.462	0.928	23.144	2208	1.297	0.771	0.971	0.507569
324	NCS1_KAN431-4_6.tif:0001-0080	1.258	15.483	0	108	71.333	8.181	0.925	19.475	1858	1.02	0.98	0.923	0.427112
325	NCS1_KAN431-4_6.tif:0002-0183	1.792	40.971	0	325	16.996	18.72	0.918	73.436	7006	1.318	0.759	0.958	1.61052
326	NCS1_KAN431-4_6.tif:0003-0237	1.614	36.026	0	404	129.78	24.305	0.923	58.153	5548	1.117	0.895	0.939	1.27536
327	NCS1_KAN431-4_6.tif:0004-0332	1.373	25.916	0	110	131.161	34.054	0.942	35.586	3395	1.086	0.921	0.939	0.780433
328	NCS1_KAN431-4_6.tif:0005-0393	1.478	13.447	0	95	48.683	40.22	0.934	19.874	1896	1.123	0.891	0.959	0.435847
329	NCS1_KAN431-4_6.tif:0006-0511	1.646	39.879	0	425	115.464	52.327	0.885	65.627	6261	1.32	0.758	0.935	1.43926
330	NCS1_KAN431-4_6.tif:0007-0590	1.059	18.802	0	207	1.892	60.386	0.941	19.905	1899	1.096	0.912	0.962	0.436537
331	NCS1_KAN431-4_6.tif:0008-0703	1.771	31.604	0	270	103.072	71.993	0.877	55.984	5341	1.387	0.721	0.931	1.22777
332	NCS1_KAN431-4_6.tif:0009-0821	1.551	55.926	0	312	113.934	84.012	0.944	86.758	8277	1.163	0.86	0.961	1.90269
333	NCS1_KAN431-4_6.tif:0010-0834	1.426	21.949	0	143	124.64	85.357	0.891	31.288	2985	1.459	0.686	0.932	0.686183
334	NCS1_KAN431-4_6.tif:0011-0862	1.321	21.722	0	152	62.649	88.259	0.943	28.689	2737	1.155	0.866	0.947	0.629174
335	NCS1_KAN431-4_6.tif:0012-1015	1.467	32.429	0	262	117.474	103.983	0.893	47.588	4540	1.082	0.924	0.927	1.04364
										5778.65				1.32838

## Sheet: IF condition
Exp. number	Cell line	Gene induced	Culture condition, fixation condition	rabbit-Alexa488	mouse IgG1-Alexa568	mouse IgG2b-Alexa647	Nuclear stain	Date	Replicate
KAN431-1	RPE-BFP-Cas9 pMCB306 (pool)		Fixed in 4% PFA, 24 hour serum starvation	NCS1, Cell Signaling, 8237P, 1:1000	CEP170, Invitrogen, 41-3200, 1:1000	Ac-Tub, 6B-11, SIGMA, 1:2000	DAPI	2019-01-03
KAN431-2	RPE-BFP-Cas9 Rab34KO (pool)		Fixed in 4% PFA, 24 hour serum starvation	NCS1, Cell Signaling, 8237P, 1:1000	CEP170, Invitrogen, 41-3200, 1:1000	Ac-Tub, 6B-11, SIGMA, 1:2000	DAPI	2019-01-03
KAN431-3	RPE-BFP-Cas9 Myo5AKO (pool)		Fixed in 4% PFA, 24 hour serum starvation	NCS1, Cell Signaling, 8237P, 1:1000	CEP170, Invitrogen, 41-3200, 1:1000	Ac-Tub, 6B-11, SIGMA, 1:2000	DAPI	2019-01-03
