# Supplementary material for: Myristoylated Neuronal Calcium Sensor-1 captures the preciliary vesicle at distal appendages
Source: eLife. 2025 Jan 30;14:e85998. doi: 10.7554/eLife.85998 (PMC11984960; doi:10.7554/eLife.85998)
Supplement: Figure 7—figure supplement 2—source data 1. [file elife-85998-fig7-figsupp2-data1.xlsx]

## Sheet: Sheet1
Exp. number	Cell line	Culture condition	Fixation condition	488	568	647	Nuclear stain	Date	Replicate
Fig.7S2A
KAN535-7	NCS1 mice #239-5 (Ncs1+/+) lung/trachea		Fixed in 4% PFA by cardiac perfusion, followed by post fix in methanol at -20C.	NCS1, Cell Signaling, 8237P, 1:500	ARL13B, 73-287, NeuroMab, 1:1000	FGFR1OP,H00011116-M01, 1:1000	DAPI	2019-12-20
KAN535-8	NCS1 mice #242-5 (Ncs1-/-) lung/trachea		Fixed in 4% PFA by cardiac perfusion, followed by post fix in methanol at -20C.	NCS1, Cell Signaling, 8237P, 1:500	ARL13B, 73-287, NeuroMab, 1:1000	FGFR1OP,H00011116-M01, 1:1000	DAPI	2019-12-20
Fig.7S2B
KAN535-1	NCS1 mice #239-2 (Ncs1+/+) brain		Fixed in 4% PFA by cardiac perfusion, followed by post fix in methanol at -20C.	NCS1, Cell Signaling, 8237P, 1:500	ARL13B, 73-287, NeuroMab, 1:1000	FGFR1OP,H00011116-M01, 1:1000	DAPI	2019-12-20
KAN535-2	NCS1 mice #242-1 (Ncs1-/-) brain		Fixed in 4% PFA by cardiac perfusion, followed by post fix in methanol at -20C.	NCS1, Cell Signaling, 8237P, 1:500	ARL13B, 73-287, NeuroMab, 1:1000	FGFR1OP,H00011116-M01, 1:1000	DAPI	2019-12-20
Fig.7S2C
KAN535-1	NCS1 mice #239-2 (Ncs1+/+) brain		Fixed in 4% PFA by cardiac perfusion, followed by post fix in methanol at -20C.	NCS1, Cell Signaling, 8237P, 1:500	ARL13B, 73-287, NeuroMab, 1:1000	FGFR1OP,H00011116-M01, 1:1000	DAPI	2019-12-20
KAN535-2	NCS1 mice #242-1 (Ncs1-/-) brain		Fixed in 4% PFA by cardiac perfusion, followed by post fix in methanol at -20C.	NCS1, Cell Signaling, 8237P, 1:500	ARL13B, 73-287, NeuroMab, 1:1000	FGFR1OP,H00011116-M01, 1:1000	DAPI	2019-12-20
Fig.7S2D
KAN509-2	NCS1 MEF #7 (WT)	24 hours serum starvation	Fixed in 4% PFA at RT for 15 minutes.	NCS1, Cell Signaling, 8237P, 1:1000	ARL13B, 73-287, NeuroMab, 1:1000	FGFR1OP,H00011116-M01, 1:1000	DAPI	2019-07-19
KAN509-3	NCS1 MEF #10 (KO)	24 hours serum starvation	Fixed in 4% PFA at RT for 15 minutes.	NCS1, Cell Signaling, 8237P, 1:1000	ARL13B, 73-287, NeuroMab, 1:1000	FGFR1OP,H00011116-M01, 1:1000	DAPI	2019-07-19
Fig.7S2E
KAN535-3	NCS1 mice #239-1 (Ncs1+/+) eye		Fixed in 4% PFA by cardiac perfusion, followed by post fix in methanol at -20C.	NCS1, Cell Signaling, 8237P, 1:500	ARL13B, 73-287, NeuroMab, 1:1000	FGFR1OP,H00011116-M01, 1:1000	DAPI	2019-12-20
KAN535-4	NCS1 mice #242-1 (Ncs1-/-) eye		Fixed in 4% PFA by cardiac perfusion, followed by post fix in methanol at -20C.	NCS1, Cell Signaling, 8237P, 1:500	ARL13B, 73-287, NeuroMab, 1:1000	FGFR1OP,H00011116-M01, 1:1000	DAPI	2019-12-20
