# Supplementary material for: Myristoylated Neuronal Calcium Sensor-1 captures the preciliary vesicle at distal appendages
Source: eLife. 2025 Jan 30;14:e85998. doi: 10.7554/eLife.85998 (PMC11984960; doi:10.7554/eLife.85998)
Supplement: Figure 7—figure supplement 3—source data 2. [file elife-85998-fig7-figsupp3-data2.xlsx]

## Sheet: Raw data
	Label	Area	Mean	Min	Max	X	Y	Circ	IntDen	RawIntDen	AR	Round	Solidity						Label	Area	Mean	Min	Max	X	Y	Circ	IntDen	RawIntDen	AR	Round	Solidity
1	GPR161_KAN523-1_1.tif:0001-0470	0.818	435.154	0	944	55.719	48.116	0.755	355.775	33942	2.139	0.468	0.872	0.532527					3	ARL13B_KAN523-1_1.tif:0001-0470	0.818	78.628	9	171	55.719	48.116	0.755	64.285	6133	2.139	0.468	0.872	0.244246
2	GPR161_KAN523-1_1.tif:0002-0665	3.438	481.457	0	1536	102.616	68.151	0.383	1655.27	157918	5.995	0.167	0.759	2.47763					4	ARL13B_KAN523-1_1.tif:0002-0665	3.438	124.317	0	357	102.616	68.151	0.383	427.408	40776	5.995	0.167	0.759	1.6239
5	GPR161_KAN523-1_10.tif:0001-0389	2.673	59.722	0	326	45.657	39.902	0.46	159.628	15229	3.933	0.254	0.757	0.238933					7	ARL13B_KAN523-1_10.tif:0001-0389	2.673	133.384	0	410	45.657	39.902	0.46	356.519	34013	3.933	0.254	0.757	1.35456
6	GPR161_KAN523-1_10.tif:0002-0565	1.897	5.862	0	63	71.625	57.947	0.507	11.121	1061	3.96	0.253	0.852	0.0166464					8	ARL13B_KAN523-1_10.tif:0002-0565	1.897	104.116	0	351	71.625	57.947	0.507	197.531	18845	3.96	0.253	0.852	0.750499
9	GPR161_KAN523-1_11.tif:0001-0216	0.765	74.411	0	249	46.724	22.087	0.706	56.937	5432	2.6	0.385	0.854	0.0852244					13	ARL13B_KAN523-1_11.tif:0001-0216	0.765	74.164	18	165	46.724	22.087	0.706	56.749	5414	2.6	0.385	0.854	0.215612
10	GPR161_KAN523-1_11.tif:0002-0400	3.658	133.135	0	1363	108.476	40.92	0.318	487.029	46464	5.533	0.181	0.689	0.728989			GPR161	ARL13B	14	ARL13B_KAN523-1_11.tif:0002-0400	3.658	123.146	0	405	108.476	40.92	0.318	450.489	42978	5.533	0.181	0.689	1.71159
11	GPR161_KAN523-1_11.tif:0003-0418	3.983	365.347	0	1679	76.264	42.827	0.349	1455.22	138832	6.465	0.155	0.825	2.17818	KAN523-1	NCS1 primary neuron #6 (WT)	52002.2	23600.3	15	ARL13B_KAN523-1_11.tif:0003-0418	3.983	141.221	0	418	76.264	42.827	0.349	562.498	53664	6.465	0.155	0.825	2.13716
12	GPR161_KAN523-1_11.tif:0004-0625	1.74	142.53	0	846	82.325	64.103	0.528	248.001	23660	3.008	0.332	0.756	0.371209	KAN523-4	NCS1 primary neuron #22 (WT)	86520	28802	16	ARL13B_KAN523-1_11.tif:0004-0625	1.74	98.307	0	341	82.325	64.103	0.528	171.053	16319	3.008	0.332	0.756	0.649902
17	GPR161_KAN523-1_12.tif:0001-0018	1.195	196.895	0	383	124.511	1.808	0.612	235.276	22446	3.145	0.318	0.88	0.352163	KAN523-5	NCS1 primary neuron #23 (WT)	54507.3	23201.4	22	ARL13B_KAN523-1_12.tif:0001-0018	1.195	81.781	21	172	124.511	1.808	0.612	97.722	9323	3.145	0.318	0.88	0.371287
18	GPR161_KAN523-1_12.tif:0002-0256	3.48	228.708	0	1190	132.867	26.196	0.361	795.898	75931	6.44	0.155	0.86	1.19131			64343.2	25201.2	23	ARL13B_KAN523-1_12.tif:0002-0256	3.48	130.009	0	409	132.867	26.196	0.361	452.428	43163	6.44	0.155	0.86	1.71896
19	GPR161_KAN523-1_12.tif:0003-0442	0.66	18.032	0	103	87.021	45.331	0.703	11.907	1136	2.488	0.402	0.857	0.0178231					24	ARL13B_KAN523-1_12.tif:0003-0442	0.66	70.302	12	121	87.021	45.331	0.703	46.424	4429	2.488	0.402	0.857	0.176384
20	GPR161_KAN523-1_12.tif:0004-0551	1.876	245.961	0	843	68.307	56.456	0.589	461.485	44027	3.082	0.324	0.834	0.690754					25	ARL13B_KAN523-1_12.tif:0004-0551	1.876	119.799	0	324	68.307	56.456	0.589	224.773	21444	3.082	0.324	0.834	0.854004
21	GPR161_KAN523-1_12.tif:0005-0614	1.971	85.011	0	303	45.485	62.914	0.39	167.521	15982	5.268	0.19	0.73	0.250747					26	ARL13B_KAN523-1_12.tif:0005-0614	1.971	82.128	9	227	45.485	62.914	0.39	161.84	15440	5.268	0.19	0.73	0.614896
27	GPR161_KAN523-1_2.tif:0001-0197	2.715	294.471	0	1483	119.399	20.282	0.429	799.43	76268	4.807	0.208	0.82	1.19659	KAN523-2	NCS1 primary neuron #10 (KO)	52590	21950.2	36	ARL13B_KAN523-1_2.tif:0001-0197	2.715	134.031	0	331	119.399	20.282	0.429	363.867	34714	4.807	0.208	0.82	1.38248
28	GPR161_KAN523-1_2.tif:0002-0341	2.652	607.83	0	3203	58.26	35.051	0.349	1611.91	153781	5.468	0.183	0.694	2.41272	KAN523-3	NCS1 primary neuron #21 (KO)	46310.2	22219.9	37	ARL13B_KAN523-1_2.tif:0002-0341	2.652	101.312	2	380	58.26	35.051	0.349	268.671	25632	5.468	0.183	0.694	1.02079
29	GPR161_KAN523-1_2.tif:0003-0382	6.394	124.934	0	1187	128.109	38.871	0.174	798.822	76210	8.044	0.124	0.497	1.19568	KAN523-6	NCS1 primary neuron #24 (KO)	41517.8	25227	38	ARL13B_KAN523-1_2.tif:0003-0382	6.394	85.618	0	271	128.109	38.871	0.174	547.436	52227	8.044	0.124	0.497	2.07993
30	GPR161_KAN523-1_2.tif:0004-0403	0.954	90.253	0	773	127.977	41.29	0.626	86.088	8213	3.077	0.325	0.929	0.128856	KAN523-7	NCS1 primary neuron #26 (KO)	30374.1	20425.8	39	ARL13B_KAN523-1_2.tif:0004-0403	0.954	82.615	17	182	127.977	41.29	0.626	78.803	7518	3.077	0.325	0.929	0.299403
31	GPR161_KAN523-1_2.tif:0005-0472	3.103	140.453	0	840	69.427	48.334	0.428	435.773	41574	5.531	0.181	0.845	0.652268			42698	22455.7	40	ARL13B_KAN523-1_2.tif:0005-0472	3.103	118.047	0	319	69.427	48.334	0.428	366.257	34942	5.531	0.181	0.845	1.39156
32	GPR161_KAN523-1_2.tif:0006-0517	2.474	277.072	0	2372	83.128	53.086	0.388	685.398	65389	5.137	0.195	0.755	1.02591					41	ARL13B_KAN523-1_2.tif:0006-0517	2.474	91.911	5	259	83.128	53.086	0.388	227.362	21691	5.137	0.195	0.755	0.863841
33	GPR161_KAN523-1_2.tif:0007-0525	3.396	190.79	0	807	109.1	53.746	0.382	647.947	61816	5.551	0.18	0.819	0.969851					42	ARL13B_KAN523-1_2.tif:0007-0525	3.396	179.951	0	550	109.1	53.746	0.382	611.134	58304	5.551	0.18	0.819	2.32195
34	GPR161_KAN523-1_2.tif:0008-0821	0.776	87.919	0	399	96.069	84.168	0.639	68.195	6506	2.751	0.364	0.86	0.102075					43	ARL13B_KAN523-1_2.tif:0008-0821	0.776	74.135	26	136	96.069	84.168	0.639	57.503	5486	2.751	0.364	0.86	0.218479
35	GPR161_KAN523-1_2.tif:0009-1004	1.635	251.699	0	628	83.18	102.835	0.657	411.57	39265	2.847	0.351	0.891	0.616041					44	ARL13B_KAN523-1_2.tif:0009-1004	1.635	95.571	3	203	83.18	102.835	0.657	156.274	14909	2.847	0.351	0.891	0.593749
45	GPR161_KAN523-1_3.tif:0001-0427	2.013	773.859	0	2985	127.28	43.607	0.514	1557.4	148581	3.472	0.288	0.797	2.33114					47	ARL13B_KAN523-1_3.tif:0001-0427	2.013	112.656	0	456	127.28	43.607	0.514	226.723	21630	3.472	0.288	0.797	0.861411
46	GPR161_KAN523-1_3.tif:0002-0662	1.53	217.966	0	1020	37.862	67.766	0.597	333.564	31823	2.859	0.35	0.839	0.499281					48	ARL13B_KAN523-1_3.tif:0002-0662	1.53	100.247	9	253	37.862	67.766	0.597	153.412	14636	2.859	0.35	0.839	0.582876
49	GPR161_KAN523-1_4.tif:0001-0249	1.813	364.913	0	1741	91.97	25.547	0.542	661.72	63130	2.966	0.337	0.749	0.990467					52	ARL13B_KAN523-1_4.tif:0001-0249	1.813	109.549	0	432	91.97	25.547	0.542	198.652	18952	2.966	0.337	0.749	0.75476
50	GPR161_KAN523-1_4.tif:0002-0360	0.996	633.063	0	1880	79.077	36.88	0.486	630.389	60141	4.145	0.241	0.848	0.943572					53	ARL13B_KAN523-1_4.tif:0002-0360	0.996	81.032	17	228	79.077	36.88	0.486	80.689	7698	4.145	0.241	0.848	0.306572
51	GPR161_KAN523-1_4.tif:0003-0362	0.891	1036.68	20	3358	81.993	37.028	0.703	923.64	88118	2.548	0.392	0.899	1.38251					54	ARL13B_KAN523-1_4.tif:0003-0362	0.891	89.941	7	216	81.993	37.028	0.703	80.134	7645	2.548	0.392	0.899	0.304461
55	GPR161_KAN523-1_5.tif:0001-0355	1.551	15.547	0	59	45.995	36.289	0.369	24.119	2301	5.673	0.176	0.708	0.0361011					57	ARL13B_KAN523-1_5.tif:0001-0355	1.551	76.75	8	187	45.995	36.289	0.369	119.063	11359	5.673	0.176	0.708	0.45237
56	GPR161_KAN523-1_5.tif:0002-0493	1.583	435.689	0	1646	34.064	50.531	0.67	689.591	65789	2.665	0.375	0.878	1.03218					58	ARL13B_KAN523-1_5.tif:0002-0493	1.583	151.06	0	451	34.064	50.531	0.67	239.091	22810	2.665	0.375	0.878	0.908405
59	GPR161_KAN523-1_6.tif:0001-0511	2.233	229.709	0	1384	72.56	52.318	0.524	512.856	48928	3.64	0.275	0.807	0.767647					61	ARL13B_KAN523-1_6.tif:0001-0511	2.233	142.441	14	563	72.56	52.318	0.524	318.02	30340	3.64	0.275	0.807	1.20829
60	GPR161_KAN523-1_6.tif:0002-0730	2.568	187.163	0	1282	75.006	74.648	0.609	480.646	45855	1.858	0.538	0.801	0.719434					62	ARL13B_KAN523-1_6.tif:0002-0730	2.568	142.959	0	645	75.006	74.648	0.609	367.127	35025	1.858	0.538	0.801	1.39487
63	GPR161_KAN523-1_7.tif:0001-0399	1.897	618.105	0	1764	103.885	40.791	0.598	1172.68	111877	2.965	0.337	0.854	1.75527					65	ARL13B_KAN523-1_7.tif:0001-0399	1.897	145.779	0	377	103.885	40.791	0.598	276.574	26386	2.965	0.337	0.854	1.05082
64	GPR161_KAN523-1_7.tif:0002-0537	2.296	92.785	0	446	25.591	55.175	0.543	212.991	20320	2.763	0.362	0.789	0.318807					66	ARL13B_KAN523-1_7.tif:0002-0537	2.296	160.347	0	513	25.591	55.175	0.543	368.081	35116	2.763	0.362	0.789	1.39849
67	GPR161_KAN523-1_8.tif:0001-0163	2.683	181.547	0	944	21.715	16.547	0.383	487.155	46476	5.228	0.191	0.772	0.729177					72	ARL13B_KAN523-1_8.tif:0001-0163	2.683	111.535	0	471	21.715	16.547	0.383	299.289	28553	5.228	0.191	0.772	1.13712
68	GPR161_KAN523-1_8.tif:0002-0199	2.337	102.305	0	592	23.5	20.522	0.406	239.133	22814	4.606	0.217	0.735	0.357936					73	ARL13B_KAN523-1_8.tif:0002-0199	2.337	97.3	3	268	23.5	20.522	0.406	227.435	21698	4.606	0.217	0.735	0.864119
69	GPR161_KAN523-1_8.tif:0003-0271	2.6	321.641	0	1499	101.396	27.76	0.38	836.106	79767	5.65	0.177	0.767	1.25149					74	ARL13B_KAN523-1_8.tif:0003-0271	2.6	111.806	0	326	101.396	27.76	0.38	290.641	27728	5.65	0.177	0.767	1.10426
70	GPR161_KAN523-1_8.tif:0004-0311	0.66	184.127	0	387	122.055	31.885	0.795	121.59	11600	2.172	0.46	0.9	0.181996					75	ARL13B_KAN523-1_8.tif:0004-0311	0.66	71.841	14	155	122.055	31.885	0.795	47.441	4526	2.172	0.46	0.9	0.180247
71	GPR161_KAN523-1_8.tif:0005-0492	1.939	141.043	0	484	101.456	50.317	0.635	273.503	26093	2.737	0.365	0.875	0.409382					76	ARL13B_KAN523-1_8.tif:0005-0492	1.939	174.627	5	529	101.456	50.317	0.635	338.627	32306	2.737	0.365	0.875	1.28658
77	GPR161_KAN523-1_9.tif:0001-0377	1.331	299.165	0	1965	71.362	38.597	0.576	398.248	37994	3.169	0.316	0.855	0.5961					79	ARL13B_KAN523-1_9.tif:0001-0377	1.331	108.48	1	380	71.362	38.597	0.576	144.409	13777	3.169	0.316	0.855	0.548667
78	GPR161_KAN523-1_9.tif:0002-0445	1.981	303.698	0	1374	79.805	45.515	0.486	601.648	57399	3.873	0.258	0.781	0.900552					80	ARL13B_KAN523-1_9.tif:0002-0445	1.981	87.106	0	218	79.805	45.515	0.486	172.563	16463	3.873	0.258	0.781	0.655636
										52002.2				0.815879															23600.3				0.939878
81	GPR161_KAN523-2_1.tif:0001-0463	2.411	722.552	0	3057	54.698	47.409	0.493	1741.95	166187	4.285	0.233	0.827	2.60736					83	ARL13B_KAN523-2_1.tif:0001-0463	2.411	115.691	0	260	54.698	47.409	0.493	278.912	26609	4.285	0.233	0.827	1.0597
82	GPR161_KAN523-2_1.tif:0002-0603	2.6	256.927	0	1352	63.467	61.838	0.627	667.883	63718	2.901	0.345	0.875	0.999692					84	ARL13B_KAN523-2_1.tif:0002-0603	2.6	172.323	0	518	63.467	61.838	0.627	447.953	42736	2.901	0.345	0.875	1.70195
85	GPR161_KAN523-2_10.tif:0001-0269	2.715	157.297	0	934	35.831	27.286	0.255	427.031	40740	6.053	0.165	0.577	0.639183					87	ARL13B_KAN523-2_10.tif:0001-0269	2.715	96.444	7	331	35.831	27.286	0.255	261.826	24979	6.053	0.165	0.577	0.994785
86	GPR161_KAN523-2_10.tif:0002-0588	2.233	586.826	0	1744	112.612	60.306	0.363	1310.17	124994	5.368	0.186	0.755	1.96107					88	ARL13B_KAN523-2_10.tif:0002-0588	2.233	88.408	7	208	112.612	60.306	0.363	197.384	18831	5.368	0.186	0.755	0.749942
89	GPR161_KAN523-2_11.tif:0001-0267	2.537	65.525	0	401	92.235	27.402	0.427	166.211	15857	5.531	0.181	0.875	0.248786					94	ARL13B_KAN523-2_11.tif:0001-0267	2.537	121.471	0	430	92.235	27.402	0.427	308.125	29396	5.531	0.181	0.875	1.17069
90	GPR161_KAN523-2_11.tif:0002-0451	3.103	257.767	0	1296	74.521	46.199	0.462	799.755	76299	4.327	0.231	0.817	1.19708					95	ARL13B_KAN523-2_11.tif:0002-0451	3.103	172.166	0	506	74.521	46.199	0.462	534.166	50961	4.327	0.231	0.817	2.02951
91	GPR161_KAN523-2_11.tif:0003-0530	0.692	423.091	28	906	40.115	54.29	0.497	292.695	27924	3.251	0.308	0.733	0.438109					96	ARL13B_KAN523-2_11.tif:0003-0530	0.692	68.652	20	132	40.115	54.29	0.497	47.493	4531	3.251	0.308	0.733	0.180446
92	GPR161_KAN523-2_11.tif:0004-0545	1.101	305.743	78	775	37.722	55.856	0.594	336.499	32103	3.289	0.304	0.798	0.503674					97	ARL13B_KAN523-2_11.tif:0004-0545	1.101	76.19	18	136	37.722	55.856	0.594	83.855	8000	3.289	0.304	0.798	0.318599
93	GPR161_KAN523-2_11.tif:0005-0579	0.283	28.815	0	148	72.605	59.353	0.594	8.155	778	2.971	0.337	0.75	0.0122063					98	ARL13B_KAN523-2_11.tif:0005-0579	0.283	54.741	24	84	72.605	59.353	0.594	15.492	1478	2.971	0.337	0.75	0.0588611
99	GPR161_KAN523-2_12.tif:0001-0254	3.019	444.382	0	1906	80.071	25.704	0.388	1341.49	127982	1.693	0.591	0.606	2.00795					103	ARL13B_KAN523-2_12.tif:0001-0254	3.019	117.92	0	552	80.071	25.704	0.388	355.974	33961	1.693	0.591	0.606	1.35249
100	GPR161_KAN523-2_12.tif:0002-0416	2.023	414.694	0	1506	30.53	42.759	0.662	838.926	80036	2.363	0.423	0.811	1.25571					104	ARL13B_KAN523-2_12.tif:0002-0416	2.023	144.228	0	412	30.53	42.759	0.662	291.773	27836	2.363	0.423	0.811	1.10856
101	GPR161_KAN523-2_12.tif:0003-0526	1.321	501.96	0	1128	21.512	53.906	0.509	662.946	63247	3.991	0.251	0.813	0.992303					105	ARL13B_KAN523-2_12.tif:0003-0526	1.321	81.929	2	172	21.512	53.906	0.509	108.204	10323	3.991	0.251	0.813	0.411112
102	GPR161_KAN523-2_12.tif:0004-0579	2.516	485.558	0	1201	100.188	59.245	0.33	1221.49	116534	6.567	0.152	0.741	1.82834					106	ARL13B_KAN523-2_12.tif:0004-0579	2.516	84.912	4	206	100.188	59.245	0.33	213.61	20379	6.567	0.152	0.741	0.81159
107	GPR161_KAN523-2_2.tif:0001-0133	0.577	56.982	0	195	122.586	13.672	0.379	32.85	3134	4.185	0.239	0.629	0.0491703					112	ARL13B_KAN523-2_2.tif:0001-0133	0.577	60.818	0	129	122.586	13.672	0.379	35.062	3345	4.185	0.239	0.629	0.133214
108	GPR161_KAN523-2_2.tif:0002-0137	2.736	573.663	0	2699	112.935	13.915	0.436	1569.41	149726	2.244	0.446	0.693	2.3491					113	ARL13B_KAN523-2_2.tif:0002-0137	2.736	154.065	0	528	112.935	13.915	0.436	421.486	40211	2.244	0.446	0.693	1.6014
109	GPR161_KAN523-2_2.tif:0003-0269	0.461	20.045	0	81	105.79	27.613	0.643	9.245	882	2.702	0.37	0.8	0.013838					114	ARL13B_KAN523-2_2.tif:0003-0269	0.461	59.5	24	101	105.79	27.613	0.643	27.442	2618	2.702	0.37	0.8	0.104261
110	GPR161_KAN523-2_2.tif:0004-0398	1.824	62.489	0	246	19.897	40.758	0.446	113.969	10873	4.598	0.217	0.819	0.17059					115	ARL13B_KAN523-2_2.tif:0004-0398	1.824	113.08	15	288	19.897	40.758	0.446	206.241	19676	4.598	0.217	0.819	0.783594
111	GPR161_KAN523-2_2.tif:0005-0478	1.572	287.74	0	1412	99.186	49.009	0.613	452.408	43161	3.002	0.333	0.845	0.677167					116	ARL13B_KAN523-2_2.tif:0005-0478	1.572	130.147	0	454	99.186	49.009	0.613	204.627	19522	3.002	0.333	0.845	0.777461
117	GPR161_KAN523-2_3.tif:0001-0412	2.264	273.986	0	1181	85.886	42.145	0.433	620.327	59181	5.201	0.192	0.818	0.92851					119	ARL13B_KAN523-2_3.tif:0001-0412	2.264	110.606	8	268	85.886	42.145	0.433	250.422	23891	5.201	0.192	0.818	0.951455
118	GPR161_KAN523-2_3.tif:0002-0569	2.704	34.434	0	234	91.288	58.327	0.326	93.121	8884	7.007	0.143	0.798	0.139384					120	ARL13B_KAN523-2_3.tif:0002-0569	2.704	90.38	7	342	91.288	58.327	0.326	244.416	23318	7.007	0.143	0.798	0.928636
121	GPR161_KAN523-2_4.tif:0001-0141	1.803	190.11	0	1475	90.536	14.482	0.631	342.746	32699	2.781	0.36	0.827	0.513025					123	ARL13B_KAN523-2_4.tif:0001-0141	1.803	143.57	0	467	90.536	14.482	0.631	258.839	24694	2.781	0.36	0.827	0.983435
122	GPR161_KAN523-2_4.tif:0002-0412	1.289	613.862	0	3522	89.996	42.182	0.745	791.433	75505	1.955	0.511	0.898	1.18462					124	ARL13B_KAN523-2_4.tif:0002-0412	1.289	188.293	0	545	89.996	42.182	0.745	242.76	23160	1.955	0.511	0.898	0.922343
125	GPR161_KAN523-2_5.tif:0001-0169	1.614	773.604	0	2737	57.308	17.268	0.669	1248.76	119135	2.804	0.357	0.919	1.86915					127	ARL13B_KAN523-2_5.tif:0001-0169	1.614	145.974	0	394	57.308	17.268	0.669	235.632	22480	2.804	0.357	0.919	0.895262
126	GPR161_KAN523-2_5.tif:0002-0541	3.773	22.411	0	180	81.904	55.434	0.335	84.568	8068	6.341	0.158	0.742	0.126581					128	ARL13B_KAN523-2_5.tif:0002-0541	3.773	136.956	0	423	81.904	55.434	0.335	516.798	49304	6.341	0.158	0.742	1.96352
129	GPR161_KAN523-2_6.tif:0001-0192	1.96	529.465	0	2036	79.642	19.622	0.712	1037.81	99010	2.268	0.441	0.884	1.5534					133	ARL13B_KAN523-2_6.tif:0001-0192	1.96	137.032	0	437	79.642	19.622	0.712	268.598	25625	2.268	0.441	0.884	1.02051
130	GPR161_KAN523-2_6.tif:0002-0430	1.446	61.5	0	291	17.289	44.15	0.435	88.96	8487	4.126	0.242	0.699	0.133155					134	ARL13B_KAN523-2_6.tif:0002-0430	1.446	75.094	13	179	17.289	44.15	0.435	108.624	10363	4.126	0.242	0.699	0.412705
131	GPR161_KAN523-2_6.tif:0003-0639	3.312	93.734	0	423	72.865	65.681	0.323	310.473	29620	5.094	0.196	0.641	0.464718					135	ARL13B_KAN523-2_6.tif:0003-0639	3.312	111.472	2	327	72.865	65.681	0.323	369.223	35225	5.094	0.196	0.641	1.40283
132	GPR161_KAN523-2_6.tif:0004-0874	2.558	179.746	0	730	99.762	89.641	0.629	459.713	43858	1.918	0.521	0.829	0.688102					136	ARL13B_KAN523-2_6.tif:0004-0874	2.558	104.193	0	344	99.762	89.641	0.629	266.48	25423	1.918	0.521	0.829	1.01247
137	GPR161_KAN523-2_8.tif:0001-0265	2.044	337.236	0	2144	61.017	27.131	0.565	689.298	65761	3.294	0.304	0.789	1.03175					140	ARL13B_KAN523-2_8.tif:0001-0265	2.044	126.708	0	388	61.017	27.131	0.565	258.986	24708	3.294	0.304	0.789	0.983992
138	GPR161_KAN523-2_8.tif:0002-0587	1.593	3.868	0	44	87.862	60.044	0.621	6.163	588	2.628	0.381	0.844	0.00922532					141	ARL13B_KAN523-2_8.tif:0002-0587	1.593	114.822	0	319	87.862	60.044	0.621	182.94	17453	2.628	0.381	0.844	0.695063
139	GPR161_KAN523-2_8.tif:0003-0748	0.43	12.659	0	78	125.645	76.652	0.789	5.44	519	1.708	0.585	0.812	0.00814276					142	ARL13B_KAN523-2_8.tif:0003-0748	0.43	66.293	32	99	125.645	76.652	0.789	28.49	2718	1.708	0.585	0.812	0.108244
143	GPR161_KAN523-2_9.tif:0001-0026	0.43	39.902	0	207	62.226	2.716	0.651	17.148	1636	2.128	0.47	0.745	0.0256677					149	ARL13B_KAN523-2_9.tif:0001-0026	0.43	64.293	18	105	62.226	2.716	0.651	27.63	2636	2.128	0.47	0.745	0.104978
144	GPR161_KAN523-2_9.tif:0002-0192	2.296	296.826	0	1443	70.806	19.641	0.516	681.373	65005	3.805	0.263	0.842	1.01988					150	ARL13B_KAN523-2_9.tif:0002-0192	2.296	132.064	14	412	70.806	19.641	0.516	303.156	28922	3.805	0.263	0.842	1.15181
145	GPR161_KAN523-2_9.tif:0003-0328	1.792	272.713	0	1084	45.805	33.664	0.653	488.811	46634	2.908	0.344	0.875	0.731656					151	ARL13B_KAN523-2_9.tif:0003-0328	1.792	138.982	0	422	45.805	33.664	0.653	249.112	23766	2.908	0.344	0.875	0.946477
146	GPR161_KAN523-2_9.tif:0004-0417	2.589	86.684	0	781	46.382	42.785	0.406	224.427	21411	5.237	0.191	0.795	0.335924					152	ARL13B_KAN523-2_9.tif:0004-0417	2.589	137.814	0	443	46.382	42.785	0.406	356.802	34040	5.237	0.191	0.795	1.35564
147	GPR161_KAN523-2_9.tif:0005-0436	1.415	814.785	0	2211	62.688	44.634	0.626	1152.96	109996	3.037	0.329	0.877	1.72576					153	ARL13B_KAN523-2_9.tif:0005-0436	1.415	104.793	15	250	62.688	44.634	0.626	148.287	14147	3.037	0.329	0.877	0.563402
148	GPR161_KAN523-2_9.tif:0006-0575	1.352	43.86	0	198	68.544	58.953	0.679	59.306	5658	2.174	0.46	0.83	0.0887702					154	ARL13B_KAN523-2_9.tif:0006-0575	1.352	115.457	6	312	68.544	58.953	0.679	156.117	14894	2.174	0.46	0.83	0.593151
										52590				0.825102															21950.2				0.874165
155	GPR161_KAN523-3_1.tif:0001-0082	2.966	212.657	0	825	92.051	8.357	0.548	630.819	60182	3.487	0.287	0.823	0.944215					158	ARL13B_KAN523-3_1.tif:0001-0082	2.966	170.746	3	462	92.051	8.357	0.548	506.494	48321	3.487	0.287	0.823	1.92438
156	GPR161_KAN523-3_1.tif:0002-0600	0.88	431.619	79	769	41.731	61.286	0.39	380.03	36256	4.362	0.229	0.664	0.568832					159	ARL13B_KAN523-3_1.tif:0002-0600	0.88	71.988	14	138	41.731	61.286	0.39	63.384	6047	4.362	0.229	0.664	0.240821
157	GPR161_KAN523-3_1.tif:0003-0625	0.367	251.771	89	458	42.642	64.039	0.59	92.366	8812	3.413	0.293	0.814	0.138254					160	ARL13B_KAN523-3_1.tif:0003-0625	0.367	62.057	32	85	42.642	64.039	0.59	22.767	2172	3.413	0.293	0.814	0.0864996
161	GPR161_KAN523-3_10.tif:0001-0419	2.421	425.468	0	2008	61.839	42.641	0.319	1030.19	98283	2.661	0.376	0.521	1.54199					163	ARL13B_KAN523-3_10.tif:0001-0419	2.421	85.606	12	206	61.839	42.641	0.319	207.279	19775	2.661	0.376	0.521	0.787536
162	GPR161_KAN523-3_10.tif:0002-0452	2.432	147.526	0	742	72.288	46.498	0.383	358.752	34226	3.255	0.307	0.64	0.536983					164	ARL13B_KAN523-3_10.tif:0002-0452	2.432	93.427	0	243	72.288	46.498	0.383	227.194	21675	3.255	0.307	0.64	0.863203
165	GPR161_KAN523-3_11.tif:0001-0010	1.3	276.347	0	1228	101.829	1.111	0.518	359.182	34267	2.398	0.417	0.709	0.537626					171	ARL13B_KAN523-3_11.tif:0001-0010	1.3	71.694	0	190	101.829	1.111	0.518	93.184	8890	2.398	0.417	0.709	0.354043
166	GPR161_KAN523-3_11.tif:0002-0379	2.39	171.956	0	900	103.085	38.79	0.63	410.952	39206	2.742	0.365	0.875	0.615116					172	ARL13B_KAN523-3_11.tif:0002-0379	2.39	276.982	0	1121	103.085	38.79	0.63	661.95	63152	2.742	0.365	0.875	2.51502
167	GPR161_KAN523-3_11.tif:0003-0422	1.75	716.856	0	2359	118.758	43.279	0.613	1254.84	119715	2.619	0.382	0.807	1.87825					173	ARL13B_KAN523-3_11.tif:0003-0422	1.75	129.126	0	366	118.758	43.279	0.613	226.031	21564	2.619	0.382	0.807	0.858783
168	GPR161_KAN523-3_11.tif:0004-0614	2.075	244.242	0	805	26.281	62.868	0.407	506.903	48360	3.522	0.284	0.675	0.758736					174	ARL13B_KAN523-3_11.tif:0004-0614	2.075	87.384	10	213	26.281	62.868	0.407	181.357	17302	3.522	0.284	0.675	0.689049
169	GPR161_KAN523-3_11.tif:0005-0800	2.054	380.607	0	1103	87.784	81.892	0.683	781.936	74599	2.676	0.374	0.916	1.17041					175	ARL13B_KAN523-3_11.tif:0005-0800	2.054	158.077	0	382	87.784	81.892	0.683	324.759	30983	2.676	0.374	0.916	1.23389
170	GPR161_KAN523-3_11.tif:0006-0823	1.31	151.936	0	312	123.372	84.349	0.722	199.071	18992	2.269	0.441	0.868	0.297972					176	ARL13B_KAN523-3_11.tif:0006-0823	1.31	93.856	19	242	123.372	84.349	0.722	122.973	11732	2.269	0.441	0.868	0.467225
177	GPR161_KAN523-3_12.tif:0001-0568	1.96	83.856	0	336	74.013	58.091	0.386	164.366	15681	5.277	0.189	0.778	0.246024					179	ARL13B_KAN523-3_12.tif:0001-0568	1.96	82.599	8	257	74.013	58.091	0.386	161.903	15446	5.277	0.189	0.778	0.615134
178	GPR161_KAN523-3_12.tif:0002-0696	2.254	61.037	0	277	66.787	71.294	0.51	137.553	13123	3.999	0.25	0.865	0.205891					180	ARL13B_KAN523-3_12.tif:0002-0696	2.254	103.437	9	235	66.787	71.294	0.51	233.106	22239	3.999	0.25	0.865	0.885665
181	GPR161_KAN523-3_2.tif:0001-0416	5.346	83.478	0	826	74.953	42.881	0.122	446.255	42574	11.735	0.085	0.465	0.667957					185	ARL13B_KAN523-3_2.tif:0001-0416	5.346	78.202	5	320	74.953	42.881	0.122	418.048	39883	11.735	0.085	0.465	1.58833
182	GPR161_KAN523-3_2.tif:0002-0472	0.65	14.742	0	94	84.322	48.208	0.429	9.58	914	3.685	0.271	0.674	0.01434					186	ARL13B_KAN523-3_2.tif:0002-0472	0.65	67.145	14	172	84.322	48.208	0.429	43.636	4163	3.685	0.271	0.674	0.165791
183	GPR161_KAN523-3_2.tif:0003-0507	2.778	87.343	0	429	59.368	52.005	0.418	242.613	23146	4.515	0.221	0.769	0.363145					187	ARL13B_KAN523-3_2.tif:0003-0507	2.778	118.494	0	465	59.368	52.005	0.418	329.141	31401	4.515	0.221	0.769	1.25054
184	GPR161_KAN523-3_2.tif:0004-0524	1.405	31.44	0	96	64.252	53.63	0.469	44.16	4213	4.366	0.229	0.838	0.0660991					188	ARL13B_KAN523-3_2.tif:0004-0524	1.405	77.672	19	159	64.252	53.63	0.469	109.095	10408	4.366	0.229	0.838	0.414497
189	GPR161_KAN523-3_3.tif:0001-0360	2.128	162.768	0	727	87.114	36.805	0.444	346.342	33042	4.464	0.224	0.832	0.518407					191	ARL13B_KAN523-3_3.tif:0001-0360	2.128	100.966	8	231	87.114	36.805	0.444	214.836	20496	4.464	0.224	0.832	0.81625
190	GPR161_KAN523-3_3.tif:0002-0543	1.939	274.535	0	1045	72.946	55.765	0.69	532.363	50789	2.233	0.448	0.877	0.796845					192	ARL13B_KAN523-3_3.tif:0002-0543	1.939	159.211	0	486	72.946	55.765	0.69	308.733	29454	2.233	0.448	0.877	1.173
193	GPR161_KAN523-3_4.tif:0001-0334	2.914	162.007	0	837	117.797	34.183	0.554	472.082	45038	3.546	0.282	0.832	0.706616					195	ARL13B_KAN523-3_4.tif:0001-0334	2.914	162.511	4	446	117.797	34.183	0.554	473.549	45178	3.546	0.282	0.832	1.79921
194	GPR161_KAN523-3_4.tif:0002-0868	0.87	29.747	0	261	68.1	88.986	0.216	25.88	2469	9.282	0.108	0.578	0.0387369					196	ARL13B_KAN523-3_4.tif:0002-0868	0.87	64.422	32	105	68.1	88.986	0.216	56.047	5347	9.282	0.108	0.578	0.212943
197	GPR161_KAN523-3_5.tif:0001-0168	2.757	693.795	0	3109	63.011	16.974	0.259	1912.6	182468	7.52	0.133	0.617	2.8628					199	ARL13B_KAN523-3_5.tif:0001-0168	2.757	85.369	5	247	63.011	16.974	0.259	235.339	22452	7.52	0.133	0.617	0.894147
198	GPR161_KAN523-3_5.tif:0002-0350	2.316	60.308	0	239	54.787	35.959	0.311	139.702	13328	6.244	0.16	0.708	0.209107					200	ARL13B_KAN523-3_5.tif:0002-0350	2.316	74.774	2	221	54.787	35.959	0.311	173.213	16525	6.244	0.16	0.708	0.658105
201	GPR161_KAN523-3_6.tif:0001-0159	1.541	253.122	0	1101	82.323	16.356	0.533	390.019	37209	3.65	0.274	0.84	0.583784					205	ARL13B_KAN523-3_6.tif:0001-0159	1.541	95.98	13	190	82.323	16.356	0.533	147.889	14109	3.65	0.274	0.84	0.561889
202	GPR161_KAN523-3_6.tif:0002-0224	1.614	88.325	0	642	71.333	23.09	0.282	142.574	13602	6.983	0.143	0.609	0.213406					206	ARL13B_KAN523-3_6.tif:0002-0224	1.614	72.675	0	257	71.333	23.09	0.282	117.313	11192	6.983	0.143	0.609	0.44572
203	GPR161_KAN523-3_6.tif:0003-0415	1.803	958.471	0	3440	91.176	42.457	0.439	1728.01	164857	4.73	0.211	0.806	2.5865					207	ARL13B_KAN523-3_6.tif:0003-0415	1.803	88.866	5	189	91.176	42.457	0.439	160.215	15285	4.73	0.211	0.806	0.608723
204	GPR161_KAN523-3_6.tif:0004-0956	1.551	467.959	0	2093	74.302	97.909	0.719	725.953	69258	1.903	0.525	0.839	1.08661					208	ARL13B_KAN523-3_6.tif:0004-0956	1.551	99.608	0	257	74.302	97.909	0.719	154.524	14742	1.903	0.525	0.839	0.587098
209	GPR161_KAN523-3_7.tif:0001-0202	1.572	167.9	0	701	61.885	20.68	0.645	263.986	25185	2.777	0.36	0.882	0.395136					211	ARL13B_KAN523-3_7.tif:0001-0202	1.572	104.407	8	300	61.885	20.68	0.645	164.156	15661	2.777	0.36	0.882	0.623697
210	GPR161_KAN523-3_7.tif:0002-0782	2.966	401.583	0	1880	122.21	80.081	0.505	1191.24	113648	3.905	0.256	0.835	1.78306					212	ARL13B_KAN523-3_7.tif:0002-0782	2.966	159.583	8	547	122.21	80.081	0.505	473.382	45162	3.905	0.256	0.835	1.79857
213	GPR161_KAN523-3_8.tif:0001-0172	2.369	380.412	0	1416	46.998	17.637	0.481	901.157	85973	4.267	0.234	0.807	1.34886					217	ARL13B_KAN523-3_8.tif:0001-0172	2.369	134.261	0	357	46.998	17.637	0.481	318.051	30343	4.267	0.234	0.807	1.20841
214	GPR161_KAN523-3_8.tif:0002-0280	1.667	96.849	0	627	74.057	28.642	0.421	161.41	15399	4.858	0.206	0.809	0.2416					218	ARL13B_KAN523-3_8.tif:0002-0280	1.667	90.767	6	205	74.057	28.642	0.421	151.274	14432	4.858	0.206	0.809	0.574752
215	GPR161_KAN523-3_8.tif:0003-0375	1.761	61.381	0	190	78.919	38.351	0.576	108.089	10312	2.958	0.338	0.791	0.161788					219	ARL13B_KAN523-3_8.tif:0003-0375	1.761	95.744	0	259	78.919	38.351	0.576	168.601	16085	2.958	0.338	0.791	0.640583
216	GPR161_KAN523-3_8.tif:0004-0389	1.163	289.171	0	1448	72.099	39.9	0.44	336.447	32098	2.92	0.342	0.685	0.503596					220	ARL13B_KAN523-3_8.tif:0004-0389	1.163	83.748	13	230	72.099	39.9	0.44	97.439	9296	2.92	0.342	0.685	0.370212
221	GPR161_KAN523-3_9.tif:0001-0163	2.809	174.858	0	685	9.846	16.766	0.354	491.201	46862	6.131	0.163	0.836	0.735233					224	ARL13B_KAN523-3_9.tif:0001-0163	2.809	108.851	16	277	9.846	16.766	0.354	305.777	29172	6.131	0.163	0.836	1.16177
222	GPR161_KAN523-3_9.tif:0002-0650	2.275	18.65	0	155	103.939	66.499	0.414	42.42	4047	5.127	0.195	0.833	0.0634947					225	ARL13B_KAN523-3_9.tif:0002-0650	2.275	109.747	0	275	103.939	66.499	0.414	249.625	23815	5.127	0.195	0.833	0.948429
223	GPR161_KAN523-3_9.tif:0003-0865	2.82	182.279	0	1076	109.971	88.603	0.571	513.957	49033	3.319	0.301	0.837	0.769295					226	ARL13B_KAN523-3_9.tif:0003-0865	2.82	171.074	0	506	109.971	88.603	0.571	482.365	46019	3.319	0.301	0.837	1.8327
										46310.2				0.726575															22219.9				0.884906
227	GPR161_KAN523-4_1.tif:0001-0464	3.595	283.114	0	995	79.47	47.279	0.227	1017.87	97108	7.437	0.134	0.59	1.52356					229	ARL13B_KAN523-4_1.tif:0001-0464	3.595	84.248	1	200	79.47	47.279	0.227	302.894	28897	7.437	0.134	0.59	1.15082
228	GPR161_KAN523-4_1.tif:0002-0468	2.411	135.257	0	632	54.22	47.957	0.494	326.08	31109	3.889	0.257	0.793	0.488079					230	ARL13B_KAN523-4_1.tif:0002-0468	2.411	131.917	0	372	54.22	47.957	0.494	318.03	30341	3.889	0.257	0.793	1.20833
231	GPR161_KAN523-4_10.tif:0001-0153	0.66	686.762	20	1986	105.063	15.727	0.744	453.508	43266	2.312	0.433	0.834	0.678814					237	ARL13B_KAN523-4_10.tif:0001-0153	0.66	70.159	16	157	105.063	15.727	0.744	46.33	4420	2.312	0.433	0.834	0.176026
232	GPR161_KAN523-4_10.tif:0002-0338	2.316	367.611	0	1133	32.789	34.688	0.287	851.567	81242	7.943	0.126	0.687	1.27463					238	ARL13B_KAN523-4_10.tif:0002-0338	2.316	72.434	13	162	32.789	34.688	0.287	167.794	16008	7.943	0.126	0.687	0.637516
233	GPR161_KAN523-4_10.tif:0003-0361	0.681	223.938	0	569	29.529	36.943	0.629	152.574	14556	3.096	0.323	0.833	0.228374					239	ARL13B_KAN523-4_10.tif:0003-0361	0.681	67.554	11	116	29.529	36.943	0.629	46.026	4391	3.096	0.323	0.833	0.174871
234	GPR161_KAN523-4_10.tif:0004-0551	2.054	125.903	0	372	58.747	56.282	0.326	258.661	24677	6.269	0.16	0.711	0.387165					240	ARL13B_KAN523-4_10.tif:0004-0551	2.054	77.153	10	157	58.747	56.282	0.326	158.507	15122	6.269	0.16	0.711	0.602231
235	GPR161_KAN523-4_10.tif:0005-0568	1.541	163.993	3	532	62.281	58.151	0.414	252.686	24107	4.745	0.211	0.748	0.378223					241	ARL13B_KAN523-4_10.tif:0005-0568	1.541	83.585	0	275	62.281	58.151	0.414	128.791	12287	4.745	0.211	0.748	0.489328
236	GPR161_KAN523-4_10.tif:0006-0732	2.61	564.245	16	2592	126.833	75.03	0.338	1472.67	140497	6.281	0.159	0.748	2.2043					242	ARL13B_KAN523-4_10.tif:0006-0732	2.61	95.301	11	270	126.833	75.03	0.338	248.735	23730	6.281	0.159	0.748	0.945043
243	GPR161_KAN523-4_11.tif:0001-0406	4.298	257.563	0	1278	108.232	41.742	0.319	1106.89	105601	3.781	0.264	0.578	1.65681					246	ARL13B_KAN523-4_11.tif:0001-0406	4.298	151.895	0	541	108.232	41.742	0.319	652.779	62277	3.781	0.264	0.578	2.48017
244	GPR161_KAN523-4_11.tif:0002-0430	0.765	95.356	0	232	111.934	44.041	0.631	72.964	6961	3.139	0.319	0.896	0.109213					247	ARL13B_KAN523-4_11.tif:0002-0430	0.765	75.219	9	177	111.934	44.041	0.631	57.556	5491	3.139	0.319	0.896	0.218678
245	GPR161_KAN523-4_11.tif:0003-0575	2.369	103.195	0	552	111.868	58.775	0.531	244.458	23322	3.061	0.327	0.781	0.365906					248	ARL13B_KAN523-4_11.tif:0003-0575	2.369	128.602	0	363	111.868	58.775	0.531	304.645	29064	3.061	0.327	0.781	1.15747
249	GPR161_KAN523-4_12.tif:0001-0272	2.191	1083.18	0	2951	49.151	27.962	0.328	2372.94	226385	6.253	0.16	0.691	3.55183					251	ARL13B_KAN523-4_12.tif:0001-0272	2.191	83.971	7	185	49.151	27.962	0.328	183.957	17550	6.253	0.16	0.691	0.698926
250	GPR161_KAN523-4_12.tif:0002-0376	3.103	241.939	0	1265	75.148	38.31	0.343	750.648	71614	3.548	0.282	0.628	1.12358					252	ARL13B_KAN523-4_12.tif:0002-0376	3.103	112.804	0	349	75.148	38.31	0.343	349.989	33390	3.548	0.282	0.628	1.32975
253	GPR161_KAN523-4_3.tif:0001-0328	2.421	811.866	0	2614	92.602	33.512	0.356	1965.78	187541	5.376	0.186	0.726	2.94239					255	ARL13B_KAN523-4_3.tif:0001-0328	2.421	100.9	0	354	92.602	33.512	0.356	244.311	23308	5.376	0.186	0.726	0.928237
254	GPR161_KAN523-4_3.tif:0002-0339	3.826	664.186	0	2218	101.126	34.804	0.295	2541.1	242428	5.852	0.171	0.662	3.80353					256	ARL13B_KAN523-4_3.tif:0002-0339	3.826	107.959	4	300	101.126	34.804	0.295	413.038	39405	5.852	0.171	0.662	1.5693
257	GPR161_KAN523-4_4.tif:0001-0096	4.685	370.685	0	2151	53.11	10.113	0.269	1736.8	165696	3.967	0.252	0.539	2.59966					262	ARL13B_KAN523-4_4.tif:0001-0096	4.685	135.199	5	646	53.11	10.113	0.269	633.461	60434	3.967	0.252	0.539	2.40677
258	GPR161_KAN523-4_4.tif:0002-0454	4.895	203.405	0	839	39.901	46.509	0.237	995.672	94990	7.018	0.142	0.654	1.49033					263	ARL13B_KAN523-4_4.tif:0002-0454	4.895	106.754	0	326	39.901	46.509	0.237	522.563	49854	7.018	0.142	0.654	1.98543
259	GPR161_KAN523-4_4.tif:0003-0572	1.488	127.845	0	339	51.794	58.618	0.495	190.288	18154	3.618	0.276	0.774	0.284824					264	ARL13B_KAN523-4_4.tif:0003-0572	1.488	69.796	0	154	51.794	58.618	0.495	103.886	9911	3.618	0.276	0.774	0.394704
260	GPR161_KAN523-4_4.tif:0004-0570	0.335	16.031	0	73	48.218	58.335	0.375	5.377	513	4.744	0.211	0.593	0.00804862					265	ARL13B_KAN523-4_4.tif:0004-0570	0.335	57.406	26	88	48.218	58.335	0.375	19.255	1837	4.744	0.211	0.593	0.0731582
261	GPR161_KAN523-4_4.tif:0005-0881	3.994	152.601	0	724	112.819	89.987	0.433	609.426	58141	3.204	0.312	0.679	0.912193					266	ARL13B_KAN523-4_4.tif:0005-0881	3.994	159.178	0	481	112.819	89.987	0.433	635.693	60647	3.204	0.312	0.679	2.41526
267	GPR161_KAN523-4_5.tif:0001-0343	3.26	162.305	0	981	90.811	35.159	0.393	529.093	50477	5.373	0.186	0.793	0.79195					270	ARL13B_KAN523-4_5.tif:0001-0343	3.26	122.158	5	431	90.811	35.159	0.393	398.216	37991	5.373	0.186	0.793	1.51299
268	GPR161_KAN523-4_5.tif:0002-0448	2.327	1117.59	0	3311	99.949	45.797	0.455	2600.59	248104	4.535	0.22	0.813	3.89258					271	ARL13B_KAN523-4_5.tif:0002-0448	2.327	138.248	0	476	99.949	45.797	0.455	321.699	30691	4.535	0.22	0.813	1.22226
269	GPR161_KAN523-4_5.tif:0003-0650	2.484	179.118	0	1063	43.888	66.709	0.528	444.965	42451	2.675	0.374	0.754	0.666028					272	ARL13B_KAN523-4_5.tif:0003-0650	2.484	157.439	10	585	43.888	66.709	0.528	391.11	37313	2.675	0.374	0.754	1.48598
273	GPR161_KAN523-4_6.tif:0001-0241	4.067	473.178	0	3236	50.723	24.745	0.324	1924.4	183593	6.046	0.165	0.729	2.88045					276	ARL13B_KAN523-4_6.tif:0001-0241	4.067	134.433	0	590	50.723	24.745	0.324	546.734	52160	6.046	0.165	0.729	2.07726
274	GPR161_KAN523-4_6.tif:0002-0538	4.308	89.783	0	483	96.838	55.293	0.281	386.791	36901	6.509	0.154	0.646	0.578952					277	ARL13B_KAN523-4_6.tif:0002-0538	4.308	125.182	2	426	96.838	55.293	0.281	539.292	51450	6.509	0.154	0.646	2.04899
275	GPR161_KAN523-4_6.tif:0003-0660	2.159	251.121	0	904	88.659	67.839	0.271	542.237	51731	4.282	0.234	0.498	0.811624					278	ARL13B_KAN523-4_6.tif:0003-0660	2.159	69.646	8	166	88.659	67.839	0.271	150.383	14347	4.282	0.234	0.498	0.571367
279	GPR161_KAN523-4_7.tif:0001-0198	2.264	435.051	0	2200	105.575	20.498	0.27	984.991	93971	3.51	0.285	0.525	1.47434					283	ARL13B_KAN523-4_7.tif:0001-0198	2.264	74.519	0	248	105.575	20.498	0.27	168.716	16096	3.51	0.285	0.525	0.641021
280	GPR161_KAN523-4_7.tif:0002-0294	2.107	212.881	0	853	45.089	30.087	0.579	448.508	42789	3.394	0.295	0.88	0.671331					284	ARL13B_KAN523-4_7.tif:0002-0294	2.107	178.98	0	561	45.089	30.087	0.579	377.085	35975	3.394	0.295	0.88	1.4327
281	GPR161_KAN523-4_7.tif:0003-0394	4.036	371.543	0	1314	63.184	40.299	0.362	1499.37	143044	4.824	0.207	0.739	2.24426					285	ARL13B_KAN523-4_7.tif:0003-0394	4.036	154.127	0	464	63.184	40.299	0.362	621.983	59339	4.824	0.207	0.739	2.36317
282	GPR161_KAN523-4_7.tif:0004-0445	1.74	712.723	0	3300	82.87	45.443	0.552	1240.13	118312	2.492	0.401	0.769	1.85624					286	ARL13B_KAN523-4_7.tif:0004-0445	1.74	217.373	0	1269	82.87	45.443	0.552	378.227	36084	2.492	0.401	0.769	1.43704
287	GPR161_KAN523-4_8.tif:0001-0424	1.53	84.548	0	258	111.944	43.344	0.702	129.388	12344	2.364	0.423	0.841	0.193669					290	ARL13B_KAN523-4_8.tif:0001-0424	1.53	116.822	0	376	111.944	43.344	0.702	178.779	17056	2.364	0.423	0.841	0.679252
288	GPR161_KAN523-4_8.tif:0002-0449	2.945	164.488	0	733	94.767	45.924	0.447	484.482	46221	4.841	0.207	0.833	0.725176					291	ARL13B_KAN523-4_8.tif:0002-0449	2.945	151.406	0	586	94.767	45.924	0.447	445.951	42545	4.841	0.207	0.833	1.69435
289	GPR161_KAN523-4_8.tif:0003-0464	3.239	52.702	0	208	125.917	47.269	0.205	170.697	16285	8.045	0.124	0.556	0.255501					292	ARL13B_KAN523-4_8.tif:0003-0464	3.239	81.201	1	206	125.917	47.269	0.205	263	25091	8.045	0.124	0.556	0.999245
293	GPR161_KAN523-4_9.tif:0001-0462	2.495	551.819	0	2500	66.604	47.27	0.494	1376.61	131333	2.97	0.337	0.722	2.06053					296	ARL13B_KAN523-4_9.tif:0001-0462	2.495	105.887	15	386	66.604	47.27	0.494	264.153	25201	2.97	0.337	0.722	1.00363
294	GPR161_KAN523-4_9.tif:0002-0803	1.572	1092.64	0	2849	59.288	82.192	0.552	1717.93	163896	3.516	0.284	0.787	2.57142					297	ARL13B_KAN523-4_9.tif:0002-0803	1.572	90.647	12	199	59.288	82.192	0.552	142.522	13597	3.516	0.284	0.787	0.541498
295	GPR161_KAN523-4_9.tif:0003-0966	1.583	499.079	0	1958	84.659	98.927	0.51	789.923	75361	3.737	0.268	0.776	1.18236					298	ARL13B_KAN523-4_9.tif:0003-0966	1.583	89.874	19	217	84.659	98.927	0.51	142.249	13571	3.737	0.268	0.776	0.540463
										86520				1.35744															28802				1.14703
299	GPR161_KAN523-5_1.tif:0001-0245	0.451	18.233	0	80	86.242	25.082	0.408	8.218	784	3.535	0.283	0.581	0.0123004					303	ARL13B_KAN523-5_1.tif:0001-0245	0.451	65.744	26	98	86.242	25.082	0.408	29.632	2827	3.535	0.283	0.581	0.112585
300	GPR161_KAN523-5_1.tif:0002-0421	2.6	469.427	0	1745	100.539	43.205	0.353	1220.28	116418	5.559	0.18	0.733	1.82652					304	ARL13B_KAN523-5_1.tif:0002-0421	2.6	93.996	0	307	100.539	43.205	0.353	244.343	23311	5.559	0.18	0.733	0.928357
301	GPR161_KAN523-5_1.tif:0003-0528	0.639	532.656	44	1177	75.348	54.137	0.579	340.577	32492	2.834	0.353	0.782	0.509778					305	ARL13B_KAN523-5_1.tif:0003-0528	0.639	69.475	24	113	75.348	54.137	0.579	44.422	4238	2.834	0.353	0.782	0.168778
302	GPR161_KAN523-5_1.tif:0004-0609	1.771	428.071	0	1540	88.994	62.316	0.497	758.3	72344	2.834	0.353	0.728	1.13503					306	ARL13B_KAN523-5_1.tif:0004-0609	1.771	92.734	4	239	88.994	62.316	0.497	164.272	15672	2.834	0.353	0.728	0.624135
307	GPR161_KAN523-5_10.tif:0001-0177	2.484	136.81	0	1074	71.732	18.054	0.365	339.864	32424	5.776	0.173	0.78	0.508711					311	ARL13B_KAN523-5_10.tif:0001-0177	2.484	118.017	0	396	71.732	18.054	0.365	293.178	27970	5.776	0.173	0.78	1.1139
308	GPR161_KAN523-5_10.tif:0002-0232	3.092	162.22	0	681	103.936	23.911	0.29	501.609	47855	5.884	0.17	0.628	0.750813					312	ARL13B_KAN523-5_10.tif:0002-0232	3.092	94.508	2	294	103.936	23.911	0.29	292.234	27880	5.884	0.17	0.628	1.11032
309	GPR161_KAN523-5_10.tif:0003-0655	1.289	243.569	9	890	24.701	67.052	0.629	314.026	29959	3.075	0.325	0.885	0.470036					313	ARL13B_KAN523-5_10.tif:0003-0655	1.289	90.382	2	228	24.701	67.052	0.629	116.527	11117	3.075	0.325	0.885	0.442733
310	GPR161_KAN523-5_10.tif:0004-0817	2.463	223.077	0	687	29.342	83.53	0.406	549.491	52423	4.021	0.249	0.705	0.822481					314	ARL13B_KAN523-5_10.tif:0004-0817	2.463	110.643	0	290	29.342	83.53	0.406	272.539	26001	4.021	0.249	0.705	1.03549
315	GPR161_KAN523-5_11.tif:0001-0280	3.386	226.789	0	3433	80.337	28.799	0.392	767.828	73253	5.462	0.183	0.814	1.14929					317	ARL13B_KAN523-5_11.tif:0001-0280	3.386	219.675	0	1105	80.337	28.799	0.392	743.74	70955	5.462	0.183	0.814	2.82577
316	GPR161_KAN523-5_11.tif:0002-0432	1.824	57.218	0	354	61.876	44.212	0.655	104.357	9956	2.926	0.342	0.926	0.156203					318	ARL13B_KAN523-5_11.tif:0002-0432	1.824	147.879	0	397	61.876	44.212	0.655	269.709	25731	2.926	0.342	0.926	1.02473
319	GPR161_KAN523-5_12.tif:0001-0567	1.709	121.344	0	446	72.49	57.96	0.583	207.321	19779	3.448	0.29	0.813	0.310319					321	ARL13B_KAN523-5_12.tif:0001-0567	1.709	98.276	7	260	72.49	57.96	0.583	167.909	16019	3.448	0.29	0.813	0.637954
320	GPR161_KAN523-5_12.tif:0002-0583	2.243	47.458	0	191	81.173	59.772	0.577	106.454	10156	3.331	0.3	0.895	0.159341					322	ARL13B_KAN523-5_12.tif:0002-0583	2.243	195.112	1	596	81.173	59.772	0.577	437.66	41754	3.331	0.3	0.895	1.66285
323	GPR161_KAN523-5_2.tif:0001-0452	3.019	43.76	0	317	113.111	46.295	0.625	132.103	12603	2.943	0.34	0.879	0.197733					328	ARL13B_KAN523-5_2.tif:0001-0452	3.019	277.212	0	928	113.111	46.295	0.625	836.84	79837	2.943	0.34	0.879	3.1795
324	GPR161_KAN523-5_2.tif:0002-0517	0.545	423.346	24	902	73.419	52.951	0.76	230.748	22014	1.844	0.542	0.881	0.345385					329	ARL13B_KAN523-5_2.tif:0002-0517	0.545	74.462	8	163	73.419	52.951	0.76	40.586	3872	1.844	0.542	0.881	0.154202
325	GPR161_KAN523-5_2.tif:0003-0528	0.786	331.227	0	773	74.68	54.125	0.672	260.39	24842	2.834	0.353	0.867	0.389754					330	ARL13B_KAN523-5_2.tif:0003-0528	0.786	74.12	13	139	74.68	54.125	0.672	58.269	5559	2.834	0.353	0.867	0.221386
326	GPR161_KAN523-5_2.tif:0004-0614	0.273	426.577	54	952	79.94	62.87	0.534	116.254	11091	3.108	0.322	0.667	0.17401					331	ARL13B_KAN523-5_2.tif:0004-0614	0.273	59.654	27	90	79.94	62.87	0.534	16.257	1551	3.108	0.322	0.667	0.0617683
327	GPR161_KAN523-5_2.tif:0005-0677	2.547	205.337	1	968	95.777	69.309	0.544	523.013	49897	3.066	0.326	0.776	0.78285					332	ARL13B_KAN523-5_2.tif:0005-0677	2.547	129.029	5	502	95.777	69.309	0.544	328.648	31354	3.066	0.326	0.776	1.24867
333	GPR161_KAN523-5_3.tif:0001-0006	0.335	10.594	0	149	141.884	0.541	0.74	3.553	339	1.789	0.559	0.889	0.00531868					337	ARL13B_KAN523-5_3.tif:0001-0006	0.335	92.656	14	166	141.884	0.541	0.74	31.079	2965	1.789	0.559	0.889	0.118081
334	GPR161_KAN523-5_3.tif:0002-0381	0.985	285.053	0	864	93.528	39.005	0.778	280.861	26795	2.186	0.457	0.895	0.420395					338	ARL13B_KAN523-5_3.tif:0002-0381	0.985	90.755	8	207	93.528	39.005	0.778	89.421	8531	2.186	0.457	0.895	0.339746
335	GPR161_KAN523-5_3.tif:0003-0711	2.128	481.537	0	1440	114.859	72.795	0.417	1024.62	97752	4.58	0.218	0.728	1.53366					339	ARL13B_KAN523-5_3.tif:0003-0711	2.128	95.892	7	234	114.859	72.795	0.417	204.04	19466	4.58	0.218	0.728	0.77523
336	GPR161_KAN523-5_3.tif:0004-0865	1.499	30.196	0	276	118.346	88.645	0.338	45.261	4318	5.948	0.168	0.717	0.0677465					340	ARL13B_KAN523-5_3.tif:0004-0865	1.499	74.776	21	138	118.346	88.645	0.338	112.083	10693	5.948	0.168	0.717	0.425847
341	GPR161_KAN523-5_4.tif:0001-0178	2.453	234.526	0	1262	32.033	18.25	0.277	575.234	54879	8.957	0.112	0.789	0.861014					344	ARL13B_KAN523-5_4.tif:0001-0178	2.453	90.812	8	336	32.033	18.25	0.277	222.74	21250	8.957	0.112	0.789	0.846278
342	GPR161_KAN523-5_4.tif:0002-0372	2.4	992.131	0	3458	124.464	38.115	0.583	2381.46	227198	3.18	0.314	0.869	3.56458					345	ARL13B_KAN523-5_4.tif:0002-0372	2.4	174.782	0	603	124.464	38.115	0.583	419.536	40025	3.18	0.314	0.869	1.59399
343	GPR161_KAN523-5_4.tif:0003-0680	1.405	65.799	0	586	104.277	69.558	0.532	92.419	8817	3.499	0.286	0.807	0.138333					346	ARL13B_KAN523-5_4.tif:0003-0680	1.405	80.119	12	170	104.277	69.558	0.532	112.533	10736	3.499	0.286	0.807	0.427559
347	GPR161_KAN523-5_5.tif:0001-0369	2.903	195.123	0	987	70.022	37.787	0.383	566.534	54049	4.688	0.213	0.726	0.847992					350	ARL13B_KAN523-5_5.tif:0001-0369	2.903	104.509	0	332	70.022	37.787	0.383	303.439	28949	4.688	0.213	0.726	1.15289
348	GPR161_KAN523-5_5.tif:0002-0516	2.233	90.92	0	362	67.418	52.669	0.351	202.992	19366	5.233	0.191	0.692	0.303839					351	ARL13B_KAN523-5_5.tif:0002-0516	2.233	84.333	11	239	67.418	52.669	0.351	188.286	17963	5.233	0.191	0.692	0.715374
349	GPR161_KAN523-5_5.tif:0003-0524	2.107	154.448	0	689	58.274	53.686	0.322	325.399	31044	6.131	0.163	0.684	0.487059					352	ARL13B_KAN523-5_5.tif:0003-0524	2.107	77.652	6	184	58.274	53.686	0.322	163.601	15608	6.131	0.163	0.684	0.621586
353	GPR161_KAN523-5_6.tif:0001-0342	1.709	282.08	0	1003	83.72	35.015	0.538	481.945	45979	3.605	0.277	0.823	0.721379					355	ARL13B_KAN523-5_6.tif:0001-0342	1.709	104.252	3	299	83.72	35.015	0.538	178.118	16993	3.605	0.277	0.823	0.676744
354	GPR161_KAN523-5_6.tif:0002-0493	3.291	620.124	0	3597	49.215	50.791	0.374	2041.02	194719	2.998	0.334	0.616	3.05501					356	ARL13B_KAN523-5_6.tif:0002-0493	3.291	108.15	0	497	49.215	50.791	0.374	355.953	33959	2.998	0.334	0.616	1.35241
357	GPR161_KAN523-5_7.tif:0001-0448	1.688	645.708	0	2878	32.842	45.857	0.714	1089.68	103959	2.459	0.407	0.89	1.63105					361	ARL13B_KAN523-5_7.tif:0001-0448	1.688	177.826	0	673	32.842	45.857	0.714	300.096	28630	2.459	0.407	0.89	1.14019
358	GPR161_KAN523-5_7.tif:0002-0630	2.044	175.954	0	638	71.885	64.432	0.477	359.643	34311	3.923	0.255	0.765	0.538316					362	ARL13B_KAN523-5_7.tif:0002-0630	2.044	104.318	0	265	71.885	64.432	0.477	213.222	20342	3.923	0.255	0.765	0.810117
359	GPR161_KAN523-5_7.tif:0003-0660	1.73	147.376	0	1516	52.413	67.598	0.281	254.887	24317	7.17	0.139	0.619	0.381517					363	ARL13B_KAN523-5_7.tif:0003-0660	1.73	76.836	7	309	52.413	67.598	0.281	132.889	12678	7.17	0.139	0.619	0.504899
360	GPR161_KAN523-5_7.tif:0004-0664	2.075	628.47	0	2260	89.827	67.968	0.525	1304.33	124437	3.761	0.266	0.859	1.95233					364	ARL13B_KAN523-5_7.tif:0004-0664	2.075	119.348	0	318	89.827	67.968	0.525	247.697	23631	3.761	0.266	0.859	0.941101
365	GPR161_KAN523-5_8.tif:0001-0192	3.616	295.093	0	996	84.415	19.573	0.438	1067.13	101807	4.854	0.206	0.789	1.59728					367	ARL13B_KAN523-5_8.tif:0001-0192	3.616	184.649	2	626	84.415	19.573	0.438	667.736	63704	4.854	0.206	0.789	2.537
366	GPR161_KAN523-5_8.tif:0002-0773	2.17	335.15	13	990	58.767	79.269	0.495	727.189	69376	2.7	0.37	0.741	1.08846					368	ARL13B_KAN523-5_8.tif:0002-0773	2.17	82.618	0	208	58.767	79.269	0.495	179.261	17102	2.7	0.37	0.741	0.681084
369	GPR161_KAN523-5_9.tif:0001-0370	2.254	416.46	0	1386	60.124	37.88	0.534	938.535	89539	3.406	0.294	0.829	1.40481					372	ARL13B_KAN523-5_9.tif:0001-0370	2.254	166.558	0	482	60.124	37.88	0.534	375.355	35810	3.406	0.294	0.829	1.42613
370	GPR161_KAN523-5_9.tif:0002-0544	2.495	402.097	0	2160	53.945	55.514	0.313	1003.1	95699	6.464	0.155	0.767	1.50145					373	ARL13B_KAN523-5_9.tif:0002-0544	2.495	102.017	0	379	53.945	55.514	0.313	254.5	24280	6.464	0.155	0.767	0.966947
371	GPR161_KAN523-5_9.tif:0003-0687	1.478	314.099	0	981	112.97	70.396	0.535	464.221	44288	4.056	0.247	0.907	0.694849					374	ARL13B_KAN523-5_9.tif:0003-0687	1.478	89.993	0	251	112.97	70.396	0.535	133.004	12689	4.056	0.247	0.907	0.505337
										54507.3				0.855183															23201.4				0.923991
375	GPR161_KAN523-6_1.tif:0001-0514	2.023	369.953	0	986	17.15	52.711	0.313	748.415	71401	6.201	0.161	0.723	1.12023					380	ARL13B_KAN523-6_1.tif:0001-0514	2.023	74.062	0	187	17.15	52.711	0.313	149.828	14294	6.201	0.161	0.723	0.569256
376	GPR161_KAN523-6_1.tif:0002-0529	2.138	199.966	0	1088	78.698	54.296	0.43	427.586	40793	3.906	0.256	0.703	0.640015					381	ARL13B_KAN523-6_1.tif:0002-0529	2.138	100.235	4	289	78.698	54.296	0.43	214.333	20448	3.906	0.256	0.703	0.814338
377	GPR161_KAN523-6_1.tif:0003-0574	3.91	91.408	0	519	97.577	58.701	0.177	357.379	34095	7.496	0.133	0.53	0.534928					382	ARL13B_KAN523-6_1.tif:0003-0574	3.91	88.155	7	261	97.577	58.701	0.177	344.664	32882	7.496	0.133	0.53	1.30952
378	GPR161_KAN523-6_1.tif:0004-0816	0.566	51.019	0	338	76.122	83.539	0.681	28.878	2755	2.629	0.38	0.857	0.0432241					383	ARL13B_KAN523-6_1.tif:0004-0816	0.566	67.204	21	120	76.122	83.539	0.681	38.039	3629	2.629	0.38	0.857	0.144524
379	GPR161_KAN523-6_1.tif:0005-0832	0.283	47.333	0	122	76.632	85.232	0.723	13.396	1278	3	0.333	1	0.020051					384	ARL13B_KAN523-6_1.tif:0005-0832	0.283	68.741	43	103	76.632	85.232	0.723	19.454	1856	3	0.333	1	0.0739149
385	GPR161_KAN523-6_10.tif:0001-0112	0.472	110.333	0	534	18.193	11.552	0.792	52.042	4965	1.936	0.517	0.865	0.0778975					389	ARL13B_KAN523-6_10.tif:0001-0112	0.472	66.8	21	127	18.193	11.552	0.792	31.508	3006	1.936	0.517	0.865	0.119713
386	GPR161_KAN523-6_10.tif:0002-0531	1.792	247.292	0	1038	38.514	54.439	0.676	443.246	42287	2.401	0.416	0.891	0.663454					390	ARL13B_KAN523-6_10.tif:0002-0531	1.792	138.942	1	362	38.514	54.439	0.676	249.038	23759	2.401	0.416	0.891	0.946198
387	GPR161_KAN523-6_10.tif:0003-0579	3.008	64.516	0	426	123.472	59.199	0.378	194.082	18516	4.693	0.213	0.687	0.290504					391	ARL13B_KAN523-6_10.tif:0003-0579	3.008	126.125	0	701	123.472	59.199	0.378	379.422	36198	4.693	0.213	0.687	1.44158
388	GPR161_KAN523-6_10.tif:0004-0900	0.451	270.93	110	431	123.508	92.194	0.644	122.114	11650	2.8	0.357	0.782	0.182781					392	ARL13B_KAN523-6_10.tif:0004-0900	0.451	66.512	33	87	123.508	92.194	0.644	29.978	2860	2.8	0.357	0.782	0.113899
393	GPR161_KAN523-6_11.tif:0001-0353	2.558	294.328	0	1399	102.321	36.159	0.363	752.765	71816	5.639	0.177	0.743	1.12674					395	ARL13B_KAN523-6_11.tif:0001-0353	2.558	112.094	0	314	102.321	36.159	0.363	286.689	27351	5.639	0.177	0.743	1.08925
394	GPR161_KAN523-6_11.tif:0002-0713	2.411	237.891	0	905	77.603	72.99	0.399	573.515	54715	5.531	0.181	0.768	0.858441					396	ARL13B_KAN523-6_11.tif:0002-0713	2.411	127.148	2	426	77.603	72.99	0.399	306.531	29244	5.531	0.181	0.768	1.16464
397	GPR161_KAN523-6_12.tif:0001-0388	1.467	260.893	0	911	79.673	39.767	0.509	382.85	36525	3.67	0.272	0.767	0.573053					399	ARL13B_KAN523-6_12.tif:0001-0388	1.467	86.779	0	246	79.673	39.767	0.509	127.344	12149	3.67	0.272	0.767	0.483832
398	GPR161_KAN523-6_12.tif:0002-0728	3.669	336.171	0	1259	72.955	74.377	0.417	1233.3	117660	4.762	0.21	0.773	1.84601					400	ARL13B_KAN523-6_12.tif:0002-0728	3.669	163.697	0	639	72.955	74.377	0.417	600.548	57294	4.762	0.21	0.773	2.28172
401	GPR161_KAN523-6_2.tif:0001-0324	1.95	270.151	0	1279	33.894	33.245	0.648	526.692	50248	2.462	0.406	0.882	0.788357					404	ARL13B_KAN523-6_2.tif:0001-0324	1.95	184.892	0	514	33.894	33.245	0.648	360.471	34390	2.462	0.406	0.882	1.36958
402	GPR161_KAN523-6_2.tif:0002-0372	3.428	44.544	0	376	118.828	38.055	0.411	152.679	14566	4.372	0.229	0.712	0.228531					405	ARL13B_KAN523-6_2.tif:0002-0372	3.428	146.086	0	893	118.828	38.055	0.411	500.718	47770	4.372	0.229	0.712	1.90243
403	GPR161_KAN523-6_2.tif:0003-0693	0.891	135.765	0	449	118.913	70.945	0.639	120.961	11540	2.913	0.343	0.829	0.181055					406	ARL13B_KAN523-6_2.tif:0003-0693	0.891	73.553	38	115	118.913	70.945	0.639	65.533	6252	2.913	0.343	0.829	0.248985
407	GPR161_KAN523-6_3.tif:0001-0208	2.065	429.056	0	1620	116.961	21.298	0.638	885.969	84524	2.881	0.347	0.895	1.32612					411	ARL13B_KAN523-6_3.tif:0001-0208	2.065	196.863	0	627	116.961	21.298	0.638	406.507	38782	2.881	0.347	0.895	1.54449
408	GPR161_KAN523-6_3.tif:0002-0263	2.851	125.011	0	551	23.609	26.972	0.437	356.415	34003	4.85	0.206	0.806	0.533484					412	ARL13B_KAN523-6_3.tif:0002-0263	2.851	134.364	0	385	23.609	26.972	0.437	383.081	36547	4.85	0.206	0.806	1.45548
409	GPR161_KAN523-6_3.tif:0003-0363	2.82	197.409	0	905	93.674	37.145	0.546	556.618	53103	3.453	0.29	0.833	0.83315					413	ARL13B_KAN523-6_3.tif:0003-0363	2.82	175.944	0	573	93.674	37.145	0.546	496.096	47329	3.453	0.29	0.833	1.88487
410	GPR161_KAN523-6_3.tif:0004-0497	2.18	125.327	0	686	95.164	50.982	0.437	273.241	26068	4.824	0.207	0.802	0.408989					414	ARL13B_KAN523-6_3.tif:0004-0497	2.18	110.649	20	289	95.164	50.982	0.437	241.24	23015	4.824	0.207	0.802	0.916569
415	GPR161_KAN523-6_4.tif:0001-0251	1.834	140.669	0	754	39.683	25.664	0.661	258.032	24617	2.313	0.432	0.831	0.386224					417	ARL13B_KAN523-6_4.tif:0001-0251	1.834	168.846	0	560	39.683	25.664	0.661	309.718	29548	2.313	0.432	0.831	1.17674
416	GPR161_KAN523-6_4.tif:0002-0399	3.784	116.745	0	970	67.638	40.933	0.307	441.758	42145	3.928	0.255	0.586	0.661227					418	ARL13B_KAN523-6_4.tif:0002-0399	3.784	111.928	2	517	67.638	40.933	0.307	423.53	40406	3.928	0.255	0.586	1.60916
419	GPR161_KAN523-6_5.tif:0001-0111	3.585	210.102	0	998	63.348	11.383	0.487	753.174	71855	4.162	0.24	0.848	1.12736					421	ARL13B_KAN523-6_5.tif:0001-0111	3.585	214.579	0	846	63.348	11.383	0.487	769.222	73386	4.162	0.24	0.848	2.92259
420	GPR161_KAN523-6_5.tif:0002-0851	4.906	101.126	0	1018	23.041	87.161	0.222	496.075	47327	2.161	0.463	0.459	0.742529					422	ARL13B_KAN523-6_5.tif:0002-0851	4.906	85.474	0	435	23.041	87.161	0.222	419.295	40002	2.161	0.463	0.459	1.59307
423	GPR161_KAN523-6_6.tif:0001-0371	2.138	350.922	0	2139	64.04	38.009	0.36	750.375	71588	6.104	0.164	0.805	1.12317					426	ARL13B_KAN523-6_6.tif:0001-0371	2.138	87.578	3	239	64.04	38.009	0.36	187.269	17866	6.104	0.164	0.805	0.711511
424	GPR161_KAN523-6_6.tif:0002-0460	1.918	297.115	0	1482	87.886	46.999	0.358	569.92	54372	3.149	0.318	0.643	0.85306					427	ARL13B_KAN523-6_6.tif:0002-0460	1.918	73	10	149	87.886	46.999	0.358	140.027	13359	3.149	0.318	0.643	0.53202
425	GPR161_KAN523-6_6.tif:0003-0573	1.709	73.135	0	336	71.809	58.706	0.655	124.954	11921	2.767	0.361	0.888	0.187032					428	ARL13B_KAN523-6_6.tif:0003-0573	1.709	124.62	11	314	71.809	58.706	0.655	212.918	20313	2.767	0.361	0.888	0.808962
429	GPR161_KAN523-6_7.tif:0001-0463	1.918	471.503	0	1989	64.659	47.441	0.376	904.427	86285	5.952	0.168	0.813	1.35375					432	ARL13B_KAN523-6_7.tif:0001-0463	1.918	82.738	4	220	64.659	47.441	0.376	158.706	15141	5.952	0.168	0.813	0.602988
430	GPR161_KAN523-6_7.tif:0002-0552	1.782	569.753	0	1462	88.448	56.471	0.352	1015.25	96858	3.455	0.289	0.637	1.51964					433	ARL13B_KAN523-6_7.tif:0002-0552	1.782	67.594	0	131	88.448	56.471	0.352	120.447	11491	3.455	0.289	0.637	0.457627
431	GPR161_KAN523-6_7.tif:0003-0665	1.509	87.208	0	266	72.335	68.078	0.641	131.631	12558	2.956	0.338	0.889	0.197027					434	ARL13B_KAN523-6_7.tif:0003-0665	1.509	100.611	0	227	72.335	68.078	0.641	151.861	14488	2.956	0.338	0.889	0.576982
435	GPR161_KAN523-6_8.tif:0001-0455	2.233	118.244	0	427	69.338	46.62	0.48	263.996	25186	4.23	0.236	0.78	0.395151					437	ARL13B_KAN523-6_8.tif:0001-0455	2.233	114.629	0	319	69.338	46.62	0.48	255.925	24416	4.23	0.236	0.78	0.972363
436	GPR161_KAN523-6_8.tif:0002-0507	1.96	234.845	0	931	69.803	51.898	0.634	460.321	43916	2.848	0.351	0.87	0.689012					438	ARL13B_KAN523-6_8.tif:0002-0507	1.96	119.674	0	320	69.803	51.898	0.634	234.574	22379	2.848	0.351	0.87	0.89124
439	GPR161_KAN523-6_9.tif:0001-0367	1.394	56.165	0	222	107.921	37.6	0.572	78.299	7470	3.25	0.308	0.826	0.117199					441	ARL13B_KAN523-6_9.tif:0001-0367	1.394	117.241	1	339	107.921	37.6	0.572	163.444	15593	3.25	0.308	0.826	0.620989
440	GPR161_KAN523-6_9.tif:0002-0722	2.054	168.367	0	1004	26.161	74.049	0.404	345.901	33000	4.975	0.201	0.792	0.517748					442	ARL13B_KAN523-6_9.tif:0002-0722	2.054	103.444	5	292	26.161	74.049	0.404	212.52	20275	4.975	0.201	0.792	0.807449
										41517.8				0.651387															25227				1.00466
443	GPR161_KAN523-7_1.tif:0001-0279	1.939	217.589	0	1128	74.642	28.666	0.472	421.937	40254	3.728	0.268	0.755	0.631558					448	ARL13B_KAN523-7_1.tif:0001-0279	1.939	92.416	9	211	74.642	28.666	0.472	179.208	17097	3.728	0.268	0.755	0.680885
444	GPR161_KAN523-7_1.tif:0002-0414	3.962	133.36	0	683	66.793	42.229	0.285	528.391	50410	5.193	0.193	0.58	0.790899					449	ARL13B_KAN523-7_1.tif:0002-0414	3.962	119.511	3	340	66.793	42.229	0.285	473.518	45175	5.193	0.193	0.58	1.79909
445	GPR161_KAN523-7_1.tif:0003-0526	1.688	157.497	0	679	45.293	53.849	0.636	265.789	25357	3.033	0.33	0.92	0.397834					450	ARL13B_KAN523-7_1.tif:0003-0526	1.688	116.957	6	429	45.293	53.849	0.636	197.373	18830	3.033	0.33	0.92	0.749902
446	GPR161_KAN523-7_1.tif:0004-0697	0.461	257.25	0	1153	52.91	71.355	0.774	118.644	11319	2.171	0.461	0.889	0.177587					451	ARL13B_KAN523-7_1.tif:0004-0697	0.461	69.909	22	111	52.91	71.355	0.774	32.242	3076	2.171	0.461	0.889	0.122501
447	GPR161_KAN523-7_1.tif:0005-0823	1.31	231.352	0	1025	40.841	84.308	0.464	303.125	28919	4.155	0.241	0.751	0.45372					452	ARL13B_KAN523-7_1.tif:0005-0823	1.31	72.264	7	158	40.841	84.308	0.464	94.683	9033	4.155	0.241	0.751	0.359738
453	GPR161_KAN523-7_10.tif:0001-0134	3.847	177.997	0	848	76.314	13.825	0.23	684.727	65325	3.048	0.328	0.449	1.02491					455	ARL13B_KAN523-7_10.tif:0001-0134	3.847	89.15	0	259	76.314	13.825	0.23	342.945	32718	3.048	0.328	0.449	1.30299
454	GPR161_KAN523-7_10.tif:0002-0867	1.761	315.601	0	1516	109.39	88.739	0.5	555.759	53021	4.509	0.222	0.882	0.831864					456	ARL13B_KAN523-7_10.tif:0002-0867	1.761	106.06	0	338	109.39	88.739	0.5	186.766	17818	4.509	0.222	0.882	0.709599
457	GPR161_KAN523-7_11.tif:0001-0526	3.134	53.946	0	291	23.561	54.031	0.354	169.072	16130	4.754	0.21	0.673	0.253069					460	ARL13B_KAN523-7_11.tif:0001-0526	3.134	112.187	0	316	23.561	54.031	0.354	351.603	33544	4.754	0.21	0.673	1.33588
458	GPR161_KAN523-7_11.tif:0002-0581	1.792	416.924	0	1704	106.923	59.476	0.477	747.294	71294	3.694	0.271	0.767	1.11855					461	ARL13B_KAN523-7_11.tif:0002-0581	1.792	112.62	0	295	106.923	59.476	0.477	201.86	19258	3.694	0.271	0.767	0.766947
459	GPR161_KAN523-7_11.tif:0003-0790	0.744	228.732	0	523	61.748	80.882	0.467	170.225	16240	4.013	0.249	0.755	0.254795					462	ARL13B_KAN523-7_11.tif:0003-0790	0.744	67.507	12	114	61.748	80.882	0.467	50.24	4793	4.013	0.249	0.755	0.19088
463	GPR161_KAN523-7_12.tif:0001-0200	3.511	146.69	0	589	43.466	20.405	0.325	515.089	49141	5.8	0.172	0.699	0.770989					466	ARL13B_KAN523-7_12.tif:0001-0200	3.511	111.373	0	291	43.466	20.405	0.325	391.078	37310	5.8	0.172	0.699	1.48586
464	GPR161_KAN523-7_12.tif:0002-0687	1.646	130.006	0	560	88.269	70.38	0.615	213.945	20411	2.936	0.341	0.86	0.320235					467	ARL13B_KAN523-7_12.tif:0002-0687	1.646	140.019	4	359	88.269	70.38	0.615	230.423	21983	2.936	0.341	0.86	0.875469
465	GPR161_KAN523-7_12.tif:0003-0704	0.88	64.81	0	331	90.831	72.123	0.675	57.063	5444	2.612	0.383	0.857	0.0854127					468	ARL13B_KAN523-7_12.tif:0003-0704	0.88	90.119	4	222	90.831	72.123	0.675	79.348	7570	2.612	0.383	0.857	0.301474
469	GPR161_KAN523-7_2.tif:0001-0579	1.876	46.994	0	209	67.754	59.193	0.619	88.173	8412	2.893	0.346	0.863	0.131979					471	ARL13B_KAN523-7_2.tif:0001-0579	1.876	177.056	0	526	67.754	59.193	0.619	332.202	31693	2.893	0.346	0.863	1.26217
470	GPR161_KAN523-7_2.tif:0002-0633	1.771	144.769	0	697	35.643	64.975	0.618	256.449	24466	2.797	0.358	0.845	0.383855					472	ARL13B_KAN523-7_2.tif:0002-0633	1.771	164.036	2	656	35.643	64.975	0.618	290.578	27722	2.797	0.358	0.845	1.10402
473	GPR161_KAN523-7_3.tif:0001-0256	2.903	121.386	0	448	109.201	26.071	0.315	352.442	33624	4.921	0.203	0.644	0.527538					478	ARL13B_KAN523-7_3.tif:0001-0256	2.903	89.917	0	288	109.201	26.071	0.315	261.072	24907	4.921	0.203	0.644	0.991917
474	GPR161_KAN523-7_3.tif:0002-0269	2.044	776.723	0	2334	40.238	27.596	0.653	1587.59	151461	3.032	0.33	0.905	2.37632					479	ARL13B_KAN523-7_3.tif:0002-0269	2.044	164.672	0	456	40.238	27.596	0.653	336.583	32111	3.032	0.33	0.905	1.27882
475	GPR161_KAN523-7_3.tif:0003-0484	2.254	202.205	0	701	17.304	49.444	0.423	455.688	43474	3.925	0.255	0.743	0.682078					480	ARL13B_KAN523-7_3.tif:0003-0484	2.254	96.805	0	271	17.304	49.444	0.423	218.159	20813	3.925	0.255	0.743	0.828874
476	GPR161_KAN523-7_3.tif:0004-0515	0.681	306.738	12	776	40.293	52.708	0.668	208.987	19938	2.732	0.366	0.85	0.312814					481	ARL13B_KAN523-7_3.tif:0004-0515	0.681	71.354	13	141	40.293	52.708	0.668	48.615	4638	2.732	0.366	0.85	0.184708
477	GPR161_KAN523-7_3.tif:0005-0812	1.667	349.157	0	1005	41.147	83.212	0.62	581.911	55516	2.948	0.339	0.85	0.871009					482	ARL13B_KAN523-7_3.tif:0005-0812	1.667	102.358	3	236	41.147	83.212	0.62	170.592	16275	2.948	0.339	0.85	0.648149
483	GPR161_KAN523-7_4.tif:0001-0163	2.736	139.874	0	427	99.627	16.645	0.529	382.661	36507	2.656	0.376	0.787	0.57277					486	ARL13B_KAN523-7_4.tif:0001-0163	2.736	168.18	0	528	99.627	16.645	0.529	460.101	43895	2.656	0.376	0.787	1.74811
484	GPR161_KAN523-7_4.tif:0002-0383	1.509	211.382	0	831	106.485	39.264	0.524	319.057	30439	3.749	0.267	0.774	0.477567					487	ARL13B_KAN523-7_4.tif:0002-0383	1.509	97.896	2	272	106.485	39.264	0.524	147.763	14097	3.749	0.267	0.774	0.561411
485	GPR161_KAN523-7_4.tif:0003-0689	2.442	258.515	0	984	100.171	70.643	0.318	631.364	60234	6.503	0.154	0.725	0.945031					488	ARL13B_KAN523-7_4.tif:0003-0689	2.442	82.27	2	204	100.171	70.643	0.318	200.927	19169	6.503	0.154	0.725	0.763402
489	GPR161_KAN523-7_5.tif:0001-0265	3.941	72.537	0	423	71.22	27.239	0.199	285.882	27274	8.164	0.122	0.551	0.427911					492	ARL13B_KAN523-7_5.tif:0001-0265	3.941	91.551	2	353	71.22	27.239	0.199	360.817	34423	8.164	0.122	0.551	1.37089
490	GPR161_KAN523-7_5.tif:0002-0369	0.325	246.516	0	1103	72.326	37.81	0.717	80.102	7642	2.541	0.394	0.838	0.119898					493	ARL13B_KAN523-7_5.tif:0002-0369	0.325	66.516	28	108	72.326	37.81	0.717	21.614	2062	2.541	0.394	0.838	0.0821188
491	GPR161_KAN523-7_5.tif:0003-0456	3.952	32.472	0	223	78.783	46.635	0.228	128.319	12242	10.632	0.094	0.784	0.192069					494	ARL13B_KAN523-7_5.tif:0003-0456	3.952	113.435	0	305	78.783	46.635	0.228	448.257	42765	10.632	0.094	0.784	1.70311
495	GPR161_KAN523-7_6.tif:0001-0353	1.876	375.525	0	1469	79.773	36.148	0.659	704.58	67219	2.757	0.363	0.836	1.05462					497	ARL13B_KAN523-7_6.tif:0001-0353	1.876	108.581	6	279	79.773	36.148	0.659	203.725	19436	2.757	0.363	0.836	0.774036
496	GPR161_KAN523-7_6.tif:0002-0487	1.761	74.976	0	470	101.506	49.939	0.514	132.029	12596	4.062	0.246	0.804	0.197623					498	ARL13B_KAN523-7_6.tif:0002-0487	1.761	91.226	1	233	101.506	49.939	0.514	160.645	15326	4.062	0.246	0.804	0.610356
499	GPR161_KAN523-7_7.tif:0001-0202	1.216	48.164	0	448	105.337	20.902	0.334	58.562	5587	3.821	0.262	0.644	0.0876563					507	ARL13B_KAN523-7_7.tif:0001-0202	1.216	74.543	16	167	105.337	20.902	0.334	90.637	8647	3.821	0.262	0.644	0.344365
500	GPR161_KAN523-7_7.tif:0002-0630	2.369	154.872	0	686	90.779	64.563	0.554	366.876	35001	3.304	0.303	0.84	0.549142					508	ARL13B_KAN523-7_7.tif:0002-0630	2.369	125.456	8	315	90.779	64.563	0.554	297.192	28353	3.304	0.303	0.84	1.12915
501	GPR161_KAN523-7_7.tif:0003-0631	2.17	35.237	0	239	118.312	64.49	0.575	76.455	7294	3.153	0.317	0.801	0.114438					509	ARL13B_KAN523-7_7.tif:0003-0631	2.17	121	0	295	118.312	64.49	0.575	262.539	25047	3.153	0.317	0.801	0.997493
502	GPR161_KAN523-7_7.tif:0004-0633	1.971	63.527	0	394	123.002	64.919	0.505	125.185	11943	3.518	0.284	0.767	0.187378					510	ARL13B_KAN523-7_7.tif:0004-0633	1.971	108.362	0	329	123.002	64.919	0.505	213.536	20372	3.518	0.284	0.767	0.811312
503	GPR161_KAN523-7_7.tif:0005-0733	0.933	129.36	0	770	120.318	75.168	0.623	120.678	11513	2.172	0.461	0.795	0.180631					511	ARL13B_KAN523-7_7.tif:0005-0733	0.933	70.584	0	169	120.318	75.168	0.623	65.847	6282	2.172	0.461	0.795	0.25018
504	GPR161_KAN523-7_7.tif:0006-0782	0.818	87.615	0	343	56.648	80.066	0.42	71.633	6834	4.088	0.245	0.684	0.107221					512	ARL13B_KAN523-7_7.tif:0006-0782	0.818	69.526	15	158	56.648	80.066	0.42	56.843	5423	4.088	0.245	0.684	0.21597
505	GPR161_KAN523-7_7.tif:0007-0783	0.388	95.378	0	340	51.679	80.185	0.68	36.99	3529	2.389	0.419	0.796	0.0553676					513	ARL13B_KAN523-7_7.tif:0007-0783	0.388	66.838	18	103	51.679	80.185	0.68	25.922	2473	2.389	0.419	0.796	0.0984868
506	GPR161_KAN523-7_7.tif:0008-0827	2.096	61.785	0	370	28.195	84.65	0.401	129.524	12357	4.8	0.208	0.726	0.193873					514	ARL13B_KAN523-7_7.tif:0008-0827	2.096	89.525	9	204	28.195	84.65	0.401	187.678	17905	4.8	0.208	0.726	0.713064
515	GPR161_KAN523-7_8.tif:0001-0513	2.694	87.23	0	766	72.763	52.524	0.485	234.982	22418	3.266	0.306	0.786	0.351723					518	ARL13B_KAN523-7_8.tif:0001-0513	2.694	123.506	0	355	72.763	52.524	0.485	332.705	31741	3.266	0.306	0.786	1.26408
516	GPR161_KAN523-7_8.tif:0002-0515	2.851	148.184	0	609	57.688	52.778	0.336	422.482	40306	6.123	0.163	0.717	0.632374					519	ARL13B_KAN523-7_8.tif:0002-0515	2.851	100.221	4	260	57.688	52.778	0.336	285.735	27260	6.123	0.163	0.717	1.08563
517	GPR161_KAN523-7_8.tif:0003-0678	0.954	123.846	0	905	73.405	69.423	0.521	118.131	11270	3.767	0.265	0.791	0.176819					520	ARL13B_KAN523-7_8.tif:0003-0678	0.954	74.989	22	160	73.405	69.423	0.521	71.528	6824	3.767	0.265	0.791	0.271765
521	GPR161_KAN523-7_9.tif:0001-0329	1.646	91.032	0	461	134.129	33.737	0.343	149.807	14292	6.553	0.153	0.801	0.224232					523	ARL13B_KAN523-7_9.tif:0001-0329	1.646	74.293	7	185	134.129	33.737	0.343	122.26	11664	6.553	0.153	0.801	0.464517
522	GPR161_KAN523-7_9.tif:0002-0577	3.26	60.08	0	285	20.54	58.891	0.283	195.854	18685	5.906	0.169	0.59	0.293155					524	ARL13B_KAN523-7_9.tif:0002-0577	3.26	89.807	6	233	20.54	58.891	0.283	292.758	27930	5.906	0.169	0.59	1.11231
										30374.1				0.476549															20425.8				0.813454
										63737.6																			25110

## Sheet: IF condition
Exp. number	Cell line	Gene induced	Culture condition, fixation condition	Rabbit -Alexa488	Mouse IgG2a-Alexa568	Mouse IgG2b Alexa647	Nuclear stain	Date	Replicate
KAN523-1	NCS1 primary neuron #6 (WT)	DIV7	Fixed in 4% PFA at RT for 15 minutes.	GPR161, in house, 1:1000	ARL13B, 73-287, NeuroMab, 1:1000	FGFR1OP,H00011116-M01, 1:1000	DAPI	2019-09-05
KAN523-2	NCS1 primary neuron #10 (KO)	DIV7	Fixed in 4% PFA at RT for 15 minutes.	GPR161, in house, 1:1000	ARL13B, 73-287, NeuroMab, 1:1000	FGFR1OP,H00011116-M01, 1:1000	DAPI	2019-09-05
KAN523-3	NCS1 primary neuron #21 (KO)	DIV7	Fixed in 4% PFA at RT for 15 minutes.	GPR161, in house, 1:1000	ARL13B, 73-287, NeuroMab, 1:1000	FGFR1OP,H00011116-M01, 1:1000	DAPI	2019-09-05
KAN523-4	NCS1 primary neuron #22 (WT)	DIV7	Fixed in 4% PFA at RT for 15 minutes.	GPR161, in house, 1:1000	ARL13B, 73-287, NeuroMab, 1:1000	FGFR1OP,H00011116-M01, 1:1000	DAPI	2019-09-05
KAN523-5	NCS1 primary neuron #23 (WT)	DIV7	Fixed in 4% PFA at RT for 15 minutes.	GPR161, in house, 1:1000	ARL13B, 73-287, NeuroMab, 1:1000	FGFR1OP,H00011116-M01, 1:1000	DAPI	2019-09-05
KAN523-6	NCS1 primary neuron #24 (KO)	DIV7	Fixed in 4% PFA at RT for 15 minutes.	GPR161, in house, 1:1000	ARL13B, 73-287, NeuroMab, 1:1000	FGFR1OP,H00011116-M01, 1:1000	DAPI	2019-09-05
KAN523-7	NCS1 primary neuron #26 (KO)	DIV7	Fixed in 4% PFA at RT for 15 minutes.	GPR161, in house, 1:1000	ARL13B, 73-287, NeuroMab, 1:1000	FGFR1OP,H00011116-M01, 1:1000	DAPI	2019-09-05

## Sheet: Statistics
	Table Analyzed	Identify outliers of GPR161_KAN523:Cleaned data
	Column B	NCS1 KO (GPR161)
	vs.	vs.
	Column A	WT (GPR161)
	Nested t test
	P value	0.1417
	P value summary	ns
	Significantly different (P < 0.05)?	No
	One- or two-tailed P value?	Two-tailed
	t, df	t=1.743, df=5
	F, DFn, Dfd	3.040, 1, 5
	How big is the difference?
	Mean of column B	0.6279
	Mean of column A	0.9631
	Difference between means (B - A) ± SEM	-0.3352 ± 0.1922
	95% confidence interval	-0.8294 to 0.1590
	Random effects	SD	Variance
	Variation within subcolumns	0.6598	0.4353
	Variation among subcolumn means	0.227	0.05152
	Do the subcolumns differ (within each column)?
	Chi-square, df	12.55, 1
	P value	0.0004
	P value summary	***
	Is there significant difference between subcolumns (P < 0.05)?	Yes
	Data analyzed
	Number of treatments (columns)	2
	Number of subjects (subcolumns)	7
	Total number of values	257
