# Supplementary material for: Myristoylated Neuronal Calcium Sensor-1 captures the preciliary vesicle at distal appendages
Source: eLife. 2025 Jan 30;14:e85998. doi: 10.7554/eLife.85998 (PMC11984960; doi:10.7554/eLife.85998)
Supplement: Figure 7—source data 1. [file elife-85998-fig7-data1.xlsx]

## Sheet: IF condition
Exp. number	Cell line	Culture condition	Fixation condition	rabbit-Alexa488	mouse IgG1-Alexa568	mouse IgG2b-Alexa647	Nuclear stain	Date	Replicate
KAN518-1	NCS1 primary neuron #5 (WT)	DIV7	Fixed in 4% PFA at RT for 15 minutes.	NCS1, Cell Signaling, 8237P, 1:1000	MAP-2, sc-74421, Santa Cruz, 1:1000, IgG1	ARL13B, 73-287, NeuroMab, 1:1000	DAPI	2019-08-13
KAN518-2	NCS1 primary neuron #10 (KO)	DIV7	Fixed in 4% PFA at RT for 15 minutes.	NCS1, Cell Signaling, 8237P, 1:1000	MAP-2, sc-74421, Santa Cruz, 1:1000, IgG1	ARL13B, 73-287, NeuroMab, 1:1000	DAPI	2019-08-13
