# Supplementary material for: Myristoylated Neuronal Calcium Sensor-1 captures the preciliary vesicle at distal appendages
Source: eLife. 2025 Jan 30;14:e85998. doi: 10.7554/eLife.85998 (PMC11984960; doi:10.7554/eLife.85998)
Supplement: Figure 7—source data 2. [file elife-85998-fig7-data2.xlsx]

## Sheet: IF condition
Exp. number	Cell line	Culture condition	Fixation condition	mouse IgG2a-Alexa488	Rabbit-Alexa568	mouse IgG2b-Alexa647	Nuclear stain	Date	Replicate
KAN535-17	NCS1 mice #239-1 brain, left		Fixed in 4% PFA by cardiac perfusion, followed by post fix in methanol at -20C.	NCS1, Santa Cruz, G-4, sc-376206, 1:500	ADCY3, C-20, sc-588 Santa Cruz, 1:1000	FGFR1OP,H00011116-M01, 1:1000	DAPI	2020-01-06
KAN535-19	NCS1 mice #242-2 brain, left		Fixed in 4% PFA by cardiac perfusion, followed by post fix in methanol at -20C.	NCS1, Santa Cruz, G-4, sc-376206, 1:500	ADCY3, C-20, sc-588 Santa Cruz, 1:1000	FGFR1OP,H00011116-M01, 1:1000	DAPI	2020-01-06
