# Supplementary material for: Myristoylated Neuronal Calcium Sensor-1 captures the preciliary vesicle at distal appendages
Source: eLife. 2025 Jan 30;14:e85998. doi: 10.7554/eLife.85998 (PMC11984960; doi:10.7554/eLife.85998)
Supplement: Figure 7—source data 3. [file elife-85998-fig7-data3.xlsx]

## Sheet: IF condition
Exp. number	Cell line	Culture condition	Fixation condition	rabbit-Alexa488	mouse IgG2a-Alexa568	mouse IgG2b-Alexa647	Nuclear stain	Date	Replicate
KAN535-9	NCS1 mice #239-4 kidney		Fixed in 4% PFA by cardiac perfusion, followed by post fix in methanol at -20C.	NCS1, Cell Signaling, 8237P, 1:500	ARL13B, 73-287, NeuroMab, 1:1000	FGFR1OP,H00011116-M01, 1:1000	DAPI	2019-12-20
KAN535-10	NCS1 mice #242-1 kidney		Fixed in 4% PFA by cardiac perfusion, followed by post fix in methanol at -20C.	NCS1, Cell Signaling, 8237P, 1:500	ARL13B, 73-287, NeuroMab, 1:1000	FGFR1OP,H00011116-M01, 1:1000	DAPI	2019-12-20
