# Supplementary material for: Myristoylated Neuronal Calcium Sensor-1 captures the preciliary vesicle at distal appendages
Source: eLife. 2025 Jan 30;14:e85998. doi: 10.7554/eLife.85998 (PMC11984960; doi:10.7554/eLife.85998)
Supplement: Figure 7—source data 5. [file elife-85998-fig7-data5.xlsx]

## Sheet: Exp.1
	Ciliated	cell counts	ARL13B+ Ac-Tub- dot		Ciliated	cell counts	ARL13B+ Ac-Tub- dot		Ciliated	cell counts	ARL13B+ Ac-Tub- dot		Ciliated	cell counts	ARL13B+ Ac-Tub- dot		Ciliated	cell counts	ARL13B+ Ac-Tub- dot
KAN508-1	1	34	2	KAN508-2	1	22		KAN508-3	0	20		KAN508-4	0	15		KAN508-5	0	24					confluent	24 hour s.s.	48 hour s.s.
2	2	28		2	4	24		2	0	23		2	3	25		2	1	24			KAN508-1	NCS1 MEF#6 (WT)	5.84795	64.4578	86.7188			WT
3	2	28		3	6	29		3	0	17		3	0	11		3	0	17			KAN508-2	NCS1 MEF#7 (WT)	11.8012	77.1242	82.3077				confluent	24 hours s.s.	48 hours s.s.
4	2	34	1	4	3	34		4	1	18		4	0	15		4	1	23			KAN508-3	NCS1 MEF#10 (KO)	0.806452	57.931	75.3333		KAN508	NCS1 MEF#6	5.84795	64.4578	86.7188
5	1	24		5	4	28		5	0	23		5	0	18		5	0	29			KAN508-4	NCS1 MEF#12 (WT)	3.57143	67.1642	87.5		KAN508	NCS1 MEF#7	11.8012	77.1242	82.3077
6	2	23		6	1	24		6	0	23		6				6	0	18			KAN508-5	NCS1 MEF#14 (KO)	1.48148	51.4851	69.2913		KAN508	NCS1 MEF#12	3.57143	67.1642	87.5
7				7				7				7				7					KAN508-6	NCS1 MEF#16 (KO)	16.3158	66.1654	77.6119		KAN512	NCS1 MEF#27	6.03448	61.9835	77.4194
8				8				8				8				8											KAN512	NCS1 MEF#30	4.44444	67.8261	72.807
9				9				9				9				9											KAN512	NCS1 MEF#32	16.0584	65.625	79.0909
10				10				10				10				10
	10	171	3		19	161	0		1	124	0		3	84	0		2	135	0									Average	7.95966	67.3635	80.974
		5.84795				11.8012				0.806452				3.57143				1.48148										S.D.	4.90155	5.21411	5.66128
																												s.e.m.	2.00105	2.12865	2.31121
	Ciliated	cell counts	ARL13B+ Ac-Tub- dot		Ciliated	cell counts	ARL13B+ Ac-Tub- dot		Ciliated	cell counts	ARL13B+ Ac-Tub- dot		Ciliated	cell counts	ARL13B+ Ac-Tub- dot		Ciliated	cell counts	ARL13B+ Ac-Tub- dot
KAN508-6	2	34		KAN508-7	18	29		KAN508-8	19	28	1	KAN508-9	14	18		KAN508-10	7	10
2	7	38		2	20	30		2	25	30		2	8	23		2	6	11										KO
3	5	33	1	3	18	26		3	17	24	2	3	14	26		3	7	8
4	7	30		4	16	25	1	4	17	21		4	12	29		4	9	12									KAN508	NCS1 MEF#10	0.806452	57.931	75.3333
5				5	18	27		5	24	27		5	10	21		5	9	15									KAN508	NCS1 MEF#14	1.48148	51.4851	69.2913
6	4	22		6	17	29		6	16	23	1	6	26	28		6	7	11									KAN508	NCS1 MEF#16	16.3158	66.1654	77.6119
7	6	33		7				7				7				7											KAN512	NCS1 MEF#19	3.81679	34.4	67.4242
8				8				8				8				8											KAN512	NCS1 MEF#22	5.59441	41.1765	60.3604
9				9				9				9				9											KAN512	NCS1 MEF#24	0.684932	34.9593	57.6577
10				10				10				10				10
	31	190	1		107	166	1		118	153	4		84	145	0		45	67	0									average	4.78331	47.6862	67.9465
		16.3158				64.4578				77.1242				57.931				67.1642										s.d.	5.96832	12.9749	7.91804
																												s.e.m.	2.43656	5.29699	3.23253
																												Ftest	0.676165	0.0669733	0.479164
	Ciliated	cell counts	ARL13B+ Ac-Tub- dot		Ciliated	cell counts	ARL13B+ Ac-Tub- dot		Ciliated	cell counts	ARL13B+ Ac-Tub- dot		Ciliated	cell counts	ARL13B+ Ac-Tub- dot		Ciliated	cell counts	ARL13B+ Ac-Tub- dot									Ttest	0.337485	0.00625877	0.00831198
KAN508-11	8	14		KAN508-12	14	18	1	KAN508-13	14	16		KAN508-14	14	16		KAN508-15	12	19
2	10	16	1	2	17	26		2	20	20		2	14	18		2	17	24
3	15	22		3	16	22		3	16	19		3	26	33	1	3	23	26
4	8	17		4	13	21	1	4	24	27		4	18	20		4	21	24
5	1	14		5	14	22		5	15	21		5	21	23		5	20	30
6	10	18		6	14	24		6	22	25		6	14	20		6	20	27
7				7				7				7				7
8				8				8				8				8
9				9				9				9				9
10				10				10				10				10
	52	101	1		88	133	2		111	128	0		107	130	1		113	150	0
		51.4851				66.1654				86.7188				82.3077				75.3333
	Ciliated	cell counts	ARL13B+ Ac-Tub- dot		Ciliated	cell counts	ARL13B+ Ac-Tub- dot		Ciliated	cell counts	ARL13B+ Ac-Tub- dot		Ciliated	cell counts	ARL13B+ Ac-Tub- dot		Ciliated	cell counts	ARL13B+ Ac-Tub- dot
KAN508-16	6	10		KAN508-17	5	16		KAN508-18	13	17
2	18	18		2	18	28		2	11	16
3	17	18		3	21	28	1	3	24	28
4	9	10		4	17	18		4	21	30
5	8	11		5	8	15		5	17	21
6	12	13		6	19	22		6	18	22
7				7				7
8				8				8
9				9				9
10				10				10
	70	80	0		88	127	1		104	134	0
		87.5				69.2913				77.6119

## Sheet: Exp.2
	Ciliated	cell counts	ARL13B+ Ac-Tub- dot		Ciliated	cell counts	ARL13B+ Ac-Tub- dot		Ciliated	cell counts	ARL13B+ Ac-Tub- dot		Ciliated	cell counts	ARL13B+ Ac-Tub- dot		Ciliated	cell counts	ARL13B+ Ac-Tub- dot
KAN512-1	0	20		KAN512-2	0	33		KAN512-3	0	26		KAN512-4	2	18		KAN512-5	2	29					confluent	24 hour s.s.	48 hour s.s.
2	0	24		2	1	23		2	0	23		2	2	22	2	2	2	22			KAN512-1	NCS1 MEF#19	3.81679	34.4	67.4242			WT
3	2	23	1	3	1	21	1	3	0	22	1	3	1	23		3	1	21	1		KAN512-2	NCS1 MEF#20	5.59441	41.1765	60.3604				confluent	24 hours s.s.	48 hours s.s.
4	0	21		4	2	20		4	0	20		4	0	13		4	1	23			KAN512-3	NCS1 MEF#24	0.684932	34.9593	57.6577		KAN512	NCS1 MEF#27	5.84795	64.4578	86.7188			Average	s.d.
5	3	18		5	2	24	1	5	0	25		5	1	20		5	0	20			KAN512-4	NCS1 MEF#27	6.03448	61.9835	77.4194		KAN512	NCS1 MEF#30	11.8012	77.1242	82.3077			57.0777	0
6	0	25		6	2	22		6	1	30		6	1	20		6	0	20			KAN512-5	NCS1 MEF#30	4.44444	67.8261	72.807		KAN512	NCS1 MEF#32	3.57143	67.1642	87.5			52.7452	43.7828
7				7				7				7				7					KAN512-6	NCS1 MEF#32	16.0584	65.625	79.0909			Average	7.07354	69.5821	85.5088			54.0548	41.459
8				8				8				8				8												S.D.	4.24959	6.67036	2.79964			4.5732	1.95555
9				9				9				9				9																		#DIV/0!	#DIV/0!
10				10				10				10				10																		#DIV/0!	#DIV/0!
	5	131	1		8	143	2		1	146	1		7	116	2		6	135	1															#DIV/0!	#DIV/0!
		3.81679				5.59441				0.684932				6.03448				4.44444																#DIV/0!	0
	Ciliated	cell counts	ARL13B+ Ac-Tub- dot		Ciliated	cell counts	ARL13B+ Ac-Tub- dot		Ciliated	cell counts	ARL13B+ Ac-Tub- dot		Ciliated	cell counts	ARL13B+ Ac-Tub- dot		Ciliated	cell counts	ARL13B+ Ac-Tub- dot
KAN512-6	2	18		KAN512-7	5	19	1	KAN512-8	8	16		KAN512-9	6	17		KAN512-10	9	15	1
2	5	26		2	7	21		2	10	21		2	8	19		2	10	20										KO
3	6	29		3	6	16		3	3	14		3	6	18		3	11	23
4	2	20		4	7	20		4	6	24		4	4	16		4	16	21									KAN512	NCS1 MEF#19	0.806452	57.931	75.3333
5	3	25		5	7	18		5	9	20		5	9	26		5	16	21									KAN512	NCS1 MEF#22	1.48148	51.4851	69.2913
6	4	19		6	11	31		6	13	24		6	10	27		6	13	21									KAN512	NCS1 MEF#24	16.3158	66.1654	77.6119
7				7				7				7				7												average	6.20124	58.5272	74.0789
8				8				8				8				8												s.d.	8.76596	7.35827	4.29981
9				9				9				9				9												Ftest	0.380586	0.902164	0.595447
10				10				10				10				10												Ttest	0.860223	0.0693971	0.00577871
	22	137	0		43	125	1		49	119	0		43	123	0		75	121	1
		16.0584				34.4				41.1765				34.9593				61.9835
	Ciliated	cell counts	ARL13B+ Ac-Tub- dot		Ciliated	cell counts	ARL13B+ Ac-Tub- dot		Ciliated	cell counts	ARL13B+ Ac-Tub- dot		Ciliated	cell counts	ARL13B+ Ac-Tub- dot		Ciliated	cell counts	ARL13B+ Ac-Tub- dot
KAN512-11	11	16		KAN512-12	9	19		KAN512-13	14	21		KAN512-14	10	16		KAN512-15	16	20
2	16	25		2	18	27		2	16	25		2	13	17		2	5	19	3
3	18	26		3	15	21		3	14	22		3	15	22		3	11	19
4	13	17		4	17	23		4	12	20		4	7	16		4	12	17
5	9	14		5	12	19		5	18	23		5	10	22		5	13	21
6	11	17		6	13	19		6	15	21		6	12	18		6	7	15
7				7				7				7				7
8				8				8				8				8
9				9				9				9				9
10				10				10				10				10
	78	115	0		84	128	0		89	132	0		67	111	0		64	111	3
		67.8261				65.625				67.4242				60.3604				57.6577
	Ciliated	cell counts	ARL13B+ Ac-Tub- dot		Ciliated	cell counts	ARL13B+ Ac-Tub- dot		Ciliated	cell counts	ARL13B+ Ac-Tub- dot		Ciliated	cell counts	ARL13B+ Ac-Tub- dot		Ciliated	cell counts	ARL13B+ Ac-Tub- dot
KAN512-16	9	14		KAN512-17	15	16		KAN512-18	7	13		KAN512-1				KAN512-1
2	15	19		2	13	16		2	12	14		2				2
3	14	14		3	16	25		3	17	21		3				3
4	12	13		4	14	19		4	15	18		4				4
5	13	18		5	14	19		5	21	25		5				5
6	9	15		6	11	19		6	15	19		6				6
7				7				7				7				7
8				8				8				8				8
9				9				9				9				9
10				10				10				10				10
	72	93	0		83	114	0		87	110	0		0	0	0		0	0	0
		77.4194				72.807				79.0909				#DIV/0!				#DIV/0!

## Sheet: IF condition
Exp. number	Cell line	Culture condition	Fixation	Mouse IgG2a-Alexa488	Rabbit-Alexa568	Mouse IgG2b Alexa647	Nuclear stain	Date	Replicate
Exp. 1
KAN508-1	NCS1 MEF #6 (WT)	confluent	Fixed in 4% PFA at RT for 15 minutes.	ARL13B, 73-287, NeuroMab, 1:1000	CEP164, 22227-1-AP, Proteintech, 1:1000	Ac-Tub, 6B-11, SIGMA, 1:2000	DAPI	2019-07-19
KAN508-2	NCS1 MEF #7 (WT)	confluent	Fixed in 4% PFA at RT for 15 minutes.	ARL13B, 73-287, NeuroMab, 1:1000	CEP164, 22227-1-AP, Proteintech, 1:1000	Ac-Tub, 6B-11, SIGMA, 1:2000	DAPI	2019-07-19
KAN508-3	NCS1 MEF #10 (KO)	confluent	Fixed in 4% PFA at RT for 15 minutes.	ARL13B, 73-287, NeuroMab, 1:1000	CEP164, 22227-1-AP, Proteintech, 1:1000	Ac-Tub, 6B-11, SIGMA, 1:2000	DAPI	2019-07-19
KAN508-4	NCS1 MEF #12 (WT)	confluent	Fixed in 4% PFA at RT for 15 minutes.	ARL13B, 73-287, NeuroMab, 1:1000	CEP164, 22227-1-AP, Proteintech, 1:1000	Ac-Tub, 6B-11, SIGMA, 1:2000	DAPI	2019-07-19
KAN508-5	NCS1 MEF #13 (KO)	confluent	Fixed in 4% PFA at RT for 15 minutes.	ARL13B, 73-287, NeuroMab, 1:1000	CEP164, 22227-1-AP, Proteintech, 1:1000	Ac-Tub, 6B-11, SIGMA, 1:2000	DAPI	2019-07-19
KAN508-6	NCS1 MEF #16 (KO)	confluent	Fixed in 4% PFA at RT for 15 minutes.	ARL13B, 73-287, NeuroMab, 1:1000	CEP164, 22227-1-AP, Proteintech, 1:1000	Ac-Tub, 6B-11, SIGMA, 1:2000	DAPI	2019-07-19
KAN508-7	NCS1 MEF #6 (WT)	24 hours serum starvation	Fixed in 4% PFA at RT for 15 minutes.	ARL13B, 73-287, NeuroMab, 1:1000	CEP164, 22227-1-AP, Proteintech, 1:1000	Ac-Tub, 6B-11, SIGMA, 1:2000	DAPI	2019-07-19
KAN508-8	NCS1 MEF #7 (WT)	24 hours serum starvation	Fixed in 4% PFA at RT for 15 minutes.	ARL13B, 73-287, NeuroMab, 1:1000	CEP164, 22227-1-AP, Proteintech, 1:1000	Ac-Tub, 6B-11, SIGMA, 1:2000	DAPI	2019-07-19
KAN508-9	NCS1 MEF #10 (KO)	24 hours serum starvation	Fixed in 4% PFA at RT for 15 minutes.	ARL13B, 73-287, NeuroMab, 1:1000	CEP164, 22227-1-AP, Proteintech, 1:1000	Ac-Tub, 6B-11, SIGMA, 1:2000	DAPI	2019-07-19
KAN508-10	NCS1 MEF #12 (WT)	24 hours serum starvation	Fixed in 4% PFA at RT for 15 minutes.	ARL13B, 73-287, NeuroMab, 1:1000	CEP164, 22227-1-AP, Proteintech, 1:1000	Ac-Tub, 6B-11, SIGMA, 1:2000	DAPI	2019-07-19
KAN508-11	NCS1 MEF #13 (KO)	24 hours serum starvation	Fixed in 4% PFA at RT for 15 minutes.	ARL13B, 73-287, NeuroMab, 1:1000	CEP164, 22227-1-AP, Proteintech, 1:1000	Ac-Tub, 6B-11, SIGMA, 1:2000	DAPI	2019-07-19
KAN508-12	NCS1 MEF #16 (KO)	24 hours serum starvation	Fixed in 4% PFA at RT for 15 minutes.	ARL13B, 73-287, NeuroMab, 1:1000	CEP164, 22227-1-AP, Proteintech, 1:1000	Ac-Tub, 6B-11, SIGMA, 1:2000	DAPI	2019-07-19
KAN508-13	NCS1 MEF #6 (WT)	48 hours serum starvation	Fixed in 4% PFA at RT for 15 minutes.	ARL13B, 73-287, NeuroMab, 1:1000	CEP164, 22227-1-AP, Proteintech, 1:1000	Ac-Tub, 6B-11, SIGMA, 1:2000	DAPI	2019-07-19
KAN508-14	NCS1 MEF #7 (WT)	48 hours serum starvation	Fixed in 4% PFA at RT for 15 minutes.	ARL13B, 73-287, NeuroMab, 1:1000	CEP164, 22227-1-AP, Proteintech, 1:1000	Ac-Tub, 6B-11, SIGMA, 1:2000	DAPI	2019-07-19
KAN508-15	NCS1 MEF #10 (KO)	48 hours serum starvation	Fixed in 4% PFA at RT for 15 minutes.	ARL13B, 73-287, NeuroMab, 1:1000	CEP164, 22227-1-AP, Proteintech, 1:1000	Ac-Tub, 6B-11, SIGMA, 1:2000	DAPI	2019-07-19
KAN508-16	NCS1 MEF #12 (WT)	48 hours serum starvation	Fixed in 4% PFA at RT for 15 minutes.	ARL13B, 73-287, NeuroMab, 1:1000	CEP164, 22227-1-AP, Proteintech, 1:1000	Ac-Tub, 6B-11, SIGMA, 1:2000	DAPI	2019-07-19
KAN508-17	NCS1 MEF #13 (KO)	48 hours serum starvation	Fixed in 4% PFA at RT for 15 minutes.	ARL13B, 73-287, NeuroMab, 1:1000	CEP164, 22227-1-AP, Proteintech, 1:1000	Ac-Tub, 6B-11, SIGMA, 1:2000	DAPI	2019-07-19
KAN508-18	NCS1 MEF #16 (KO)	48 hours serum starvation	Fixed in 4% PFA at RT for 15 minutes.	ARL13B, 73-287, NeuroMab, 1:1000	CEP164, 22227-1-AP, Proteintech, 1:1000	Ac-Tub, 6B-11, SIGMA, 1:2000	DAPI	2019-07-19
Exp. 2
KAN512-1	NCS1 MEF #19 (KO)	confluent	Fixed in 4% PFA at RT for 15 minutes.	ARL13B, 73-287, NeuroMab, 1:1000	CEP164, 22227-1-AP, Proteintech, 1:1000	Ac-Tub, 6B-11, SIGMA, 1:2000	DAPI	2019-07-26
KAN512-2	NCS1 MEF #20 (KO)	confluent	Fixed in 4% PFA at RT for 15 minutes.	ARL13B, 73-287, NeuroMab, 1:1000	CEP164, 22227-1-AP, Proteintech, 1:1000	Ac-Tub, 6B-11, SIGMA, 1:2000	DAPI	2019-07-26
KAN512-3	NCS1 MEF #24 (KO)	confluent	Fixed in 4% PFA at RT for 15 minutes.	ARL13B, 73-287, NeuroMab, 1:1000	CEP164, 22227-1-AP, Proteintech, 1:1000	Ac-Tub, 6B-11, SIGMA, 1:2000	DAPI	2019-07-26
KAN512-4	NCS1 MEF #27 (WT)	confluent	Fixed in 4% PFA at RT for 15 minutes.	ARL13B, 73-287, NeuroMab, 1:1000	CEP164, 22227-1-AP, Proteintech, 1:1000	Ac-Tub, 6B-11, SIGMA, 1:2000	DAPI	2019-07-26
KAN512-5	NCS1 MEF #30 (WT)	confluent	Fixed in 4% PFA at RT for 15 minutes.	ARL13B, 73-287, NeuroMab, 1:1000	CEP164, 22227-1-AP, Proteintech, 1:1000	Ac-Tub, 6B-11, SIGMA, 1:2000	DAPI	2019-07-26
KAN512-6	NCS1 MEF #32 (WT)	confluent	Fixed in 4% PFA at RT for 15 minutes.	ARL13B, 73-287, NeuroMab, 1:1000	CEP164, 22227-1-AP, Proteintech, 1:1000	Ac-Tub, 6B-11, SIGMA, 1:2000	DAPI	2019-07-26
KAN512-7	NCS1 MEF #19 (KO)	24 hours serum starvation	Fixed in 4% PFA at RT for 15 minutes.	ARL13B, 73-287, NeuroMab, 1:1000	CEP164, 22227-1-AP, Proteintech, 1:1000	Ac-Tub, 6B-11, SIGMA, 1:2000	DAPI	2019-07-26
KAN512-8	NCS1 MEF #20 (KO)	24 hours serum starvation	Fixed in 4% PFA at RT for 15 minutes.	ARL13B, 73-287, NeuroMab, 1:1000	CEP164, 22227-1-AP, Proteintech, 1:1000	Ac-Tub, 6B-11, SIGMA, 1:2000	DAPI	2019-07-26
KAN512-9	NCS1 MEF #24 (KO)	24 hours serum starvation	Fixed in 4% PFA at RT for 15 minutes.	ARL13B, 73-287, NeuroMab, 1:1000	CEP164, 22227-1-AP, Proteintech, 1:1000	Ac-Tub, 6B-11, SIGMA, 1:2000	DAPI	2019-07-26
KAN512-10	NCS1 MEF #27 (WT)	24 hours serum starvation	Fixed in 4% PFA at RT for 15 minutes.	ARL13B, 73-287, NeuroMab, 1:1000	CEP164, 22227-1-AP, Proteintech, 1:1000	Ac-Tub, 6B-11, SIGMA, 1:2000	DAPI	2019-07-26
KAN512-11	NCS1 MEF #30 (WT)	24 hours serum starvation	Fixed in 4% PFA at RT for 15 minutes.	ARL13B, 73-287, NeuroMab, 1:1000	CEP164, 22227-1-AP, Proteintech, 1:1000	Ac-Tub, 6B-11, SIGMA, 1:2000	DAPI	2019-07-26
KAN512-12	NCS1 MEF #32 (WT)	24 hours serum starvation	Fixed in 4% PFA at RT for 15 minutes.	ARL13B, 73-287, NeuroMab, 1:1000	CEP164, 22227-1-AP, Proteintech, 1:1000	Ac-Tub, 6B-11, SIGMA, 1:2000	DAPI	2019-07-26
KAN512-13	NCS1 MEF #19 (KO)	48 hours serum starvation	Fixed in 4% PFA at RT for 15 minutes.	ARL13B, 73-287, NeuroMab, 1:1000	CEP164, 22227-1-AP, Proteintech, 1:1000	Ac-Tub, 6B-11, SIGMA, 1:2000	DAPI	2019-07-26
KAN512-14	NCS1 MEF #20 (KO)	48 hours serum starvation	Fixed in 4% PFA at RT for 15 minutes.	ARL13B, 73-287, NeuroMab, 1:1000	CEP164, 22227-1-AP, Proteintech, 1:1000	Ac-Tub, 6B-11, SIGMA, 1:2000	DAPI	2019-07-26
KAN512-15	NCS1 MEF #24 (KO)	48 hours serum starvation	Fixed in 4% PFA at RT for 15 minutes.	ARL13B, 73-287, NeuroMab, 1:1000	CEP164, 22227-1-AP, Proteintech, 1:1000	Ac-Tub, 6B-11, SIGMA, 1:2000	DAPI	2019-07-26
KAN512-16	NCS1 MEF #27 (WT)	48 hours serum starvation	Fixed in 4% PFA at RT for 15 minutes.	ARL13B, 73-287, NeuroMab, 1:1000	CEP164, 22227-1-AP, Proteintech, 1:1000	Ac-Tub, 6B-11, SIGMA, 1:2000	DAPI	2019-07-26
KAN512-17	NCS1 MEF #30 (WT)	48 hours serum starvation	Fixed in 4% PFA at RT for 15 minutes.	ARL13B, 73-287, NeuroMab, 1:1000	CEP164, 22227-1-AP, Proteintech, 1:1000	Ac-Tub, 6B-11, SIGMA, 1:2000	DAPI	2019-07-26
KAN512-18	NCS1 MEF #32 (WT)	48 hours serum starvation	Fixed in 4% PFA at RT for 15 minutes.	ARL13B, 73-287, NeuroMab, 1:1000	CEP164, 22227-1-AP, Proteintech, 1:1000	Ac-Tub, 6B-11, SIGMA, 1:2000	DAPI	2019-07-26

## Sheet: Total analysis
	WT
		confluent	24 hours s.s.	48 hours s.s.
KAN508-1	NCS1 MEF#6	5.84795	64.4578	86.7188
KAN508-2	NCS1 MEF#7	11.8012	77.1242	82.3077
KAN508-4	NCS1 MEF#12	3.57143	67.1642	87.5
KAN512-4	NCS1 MEF#27	6.03448	61.9835	77.4194
KAN512-5	NCS1 MEF#30	4.44444	67.8261	72.807
KAN512-6	NCS1 MEF#32	16.0584	65.625	79.0909
	Average	7.95966	67.3635	80.974
	S.D.	4.90155	5.21411	5.66128
	s.e.m.	2.00105	2.12865	2.31121
	KO
KAN508-3	NCS1 MEF#10	0.806452	57.931	75.3333
KAN508-5	NCS1 MEF#14	1.48148	51.4851	69.2913
KAN508-6	NCS1 MEF#16	16.3158	66.1654	77.6119
KAN512-1	NCS1 MEF#19	3.81679	34.4	67.4242
KAN512-2	NCS1 MEF#20	5.59441	41.1765	60.3604
KAN512-3	NCS1 MEF#24	0.684932	34.9593	57.6577
	average	4.78331	47.6862	67.9465
	s.d.	5.96832	12.9749	7.91804
	s.e.m.	2.43656	5.29699	3.23253

## Sheet: Statistics
	0 hour (Ncs1+/+ v.s. Ncs1-/-)			24 hours (Ncs1+/+ v.s. Ncs1-/-)				48 hours (Ncs1+/+ v.s. Ncs1-/-)
				Table Analyzed	Data 1		Table Analyzed	Data 1
	Table Analyzed	Data 1
				Column D	KO 24h		Column F	KO 48h
	Column B	KO 0h		vs.	vs.		vs.	vs.
	vs.	vs.		Column C	WT 24h		Column E	WT 48h
	Column A	WT 0h
				Unpaired t test with Welch's correction			Unpaired t test with Welch's correction
	Unpaired t test with Welch's correction			P value	0.0118		P value	0.0095
	P value	0.3384		P value summary	*		P value summary	**
	P value summary	ns		Significantly different (P < 0.05)?	Yes		Significantly different (P < 0.05)?	Yes
	Significantly different (P < 0.05)?	No		One- or two-tailed P value?	Two-tailed		One- or two-tailed P value?	Two-tailed
	One- or two-tailed P value?	Two-tailed		Welch-corrected t, df	t=3.447, df=6.574		Welch-corrected t, df	t=3.278, df=9.053
	Welch-corrected t, df	t=1.007, df=9.636
				How big is the difference?			How big is the difference?
	How big is the difference?			Mean of column C	67.36		Mean of column E	80.97
	Mean of column A	7.96		Mean of column D	47.69		Mean of column F	67.95
	Mean of column B	4.783		Difference between means (D - C) ± SEM	-19.68 ± 5.709		Difference between means (F - E) ± SEM	-13.03 ± 3.974
	Difference between means (B - A) ± SEM	-3.176 ± 3.153		95% confidence interval	-33.36 to -5.999		95% confidence interval	-22.01 to -4.046
	95% confidence interval	-10.24 to 3.885		R squared (eta squared)	0.6438		R squared (eta squared)	0.5428
	R squared (eta squared)	0.09529
				F test to compare variances			F test to compare variances
	F test to compare variances			F, DFn, Dfd	6.192, 5, 5		F, DFn, Dfd	1.956, 5, 5
	F, DFn, Dfd	1.483, 5, 5		P value	0.067		P value	0.4792
	P value	0.6762		P value summary	ns		P value summary	ns
	P value summary	ns		Significantly different (P < 0.05)?	No		Significantly different (P < 0.05)?	No
	Significantly different (P < 0.05)?	No
				Data analyzed			Data analyzed
	Data analyzed			Sample size, column C	6		Sample size, column E	6
	Sample size, column A	6		Sample size, column D	6		Sample size, column F	6
	Sample size, column B	6
