# Supplementary material for: Myristoylated Neuronal Calcium Sensor-1 captures the preciliary vesicle at distal appendages
Source: eLife. 2025 Jan 30;14:e85998. doi: 10.7554/eLife.85998 (PMC11984960; doi:10.7554/eLife.85998)
Supplement: Figure 7—source data 6. [file elife-85998-fig7-data6.xlsx]

## Sheet: Exp.1_KAN508
	Label	Area	Mean	Min	Max	X	Y	Circ	IntDen	RawIntDen	AR	Round	Solidity						Label	Area	Mean	Min	Max	X	Y	Circ	IntDen	RawIntDen	AR	Round	Solidity
1209	ARL13B_KAN508-7_1.tif:0001-0098	2.418	956.473	309	1929	68.967	15.75	0.36	2312.89	88952	6.101	0.164	0.744	2.63896
1210	ARL13B_KAN508-7_1.tif:0002-0126	1.56	594.483	304	1230	142.591	20.194	0.514	927.45	35669	3.58	0.279	0.732	1.0582
1211	ARL13B_KAN508-7_1.tif:0003-0201	0.78	352.967	182	493	31.906	32.562	0.221	275.331	10589	8.106	0.123	0.645	0.314147
1212	ARL13B_KAN508-7_1.tif:0004-0231	1.456	1150.7	248	3183	192.95	37.341	0.775	1675.52	64439	2.446	0.409	0.941	1.91173
1213	ARL13B_KAN508-7_1.tif:0005-0239	1.924	865.149	209	2867	65.204	38.622	0.615	1664.65	64021	2.803	0.357	0.771	1.89933
1214	ARL13B_KAN508-7_1.tif:0006-0280	1.69	755.923	256	1618	193.179	45.357	0.609	1277.59	49135	2.891	0.346	0.778	1.4577
1215	ARL13B_KAN508-7_1.tif:0007-0392	0.884	513.529	300	731	100.288	63.238	0.283	453.987	17460	7.158	0.14	0.63	0.517991
1216	ARL13B_KAN508-7_1.tif:0008-0499	1.04	488.4	302	938	153.026	80.669	0.44	507.967	19536	3.767	0.265	0.708	0.57958
1217	ARL13B_KAN508-7_1.tif:0009-0551	0.832	397.188	268	610	153.016	88.96	0.419	330.48	12710	4.096	0.244	0.64	0.377071
1218	ARL13B_KAN508-7_1.tif:0010-0632	1.196	816.174	312	2133	212.654	101.892	0.795	976.203	37544	1.872	0.534	0.868	1.11383
1219	ARL13B_KAN508-7_1.tif:0011-0687	1.482	751.684	305	1560	41.901	110.794	0.614	1114.06	42846	3.299	0.303	0.891	1.27112
1220	ARL13B_KAN508-7_1.tif:0012-0698	0.598	334.696	288	396	177.995	112.626	0.521	200.16	7698	3.793	0.264	0.73	0.228379
1221	ARL13B_KAN508-7_1.tif:0013-0733	0.468	363.944	306	470	169.106	118.178	0.472	170.336	6551	4.065	0.246	0.72	0.19435
1222	ARL13B_KAN508-7_1.tif:0014-0755	1.586	698.41	308	2202	138.486	121.676	0.685	1107.74	42603	2.31	0.433	0.777	1.26392
1223	ARL13B_KAN508-7_1.tif:0015-0881	1.014	459.872	300	738	149.295	142.076	0.39	466.338	17935	4.982	0.201	0.634	0.532083
1224	ARL13B_KAN508-7_1.tif:0016-0986	1.846	517.225	31	1373	52.071	159.064	0.381	954.855	36723	5.005	0.2	0.71	1.08947
1241	ARL13B_KAN508-7_2.tif:0001-0008	1.092	959.881	327	1681	207.179	1.263	0.695	1048.25	40315	2.428	0.412	0.848	1.19604
1242	ARL13B_KAN508-7_2.tif:0002-0033	1.04	472.825	300	989	141.59	5.483	0.5	491.768	18913	3.991	0.251	0.69	0.561097
1243	ARL13B_KAN508-7_2.tif:0003-0039	0.988	556.316	305	1185	175.661	6.297	0.583	549.673	21140	3.531	0.283	0.745	0.627167
1244	ARL13B_KAN508-7_2.tif:0004-0047	0.728	356.929	114	584	22.892	7.671	0.463	259.86	9994	3.146	0.318	0.636	0.296495
1245	ARL13B_KAN508-7_2.tif:0005-0133	1.118	597.302	300	907	25.153	21.381	0.682	667.824	25684	1.965	0.509	0.789	0.761975
1246	ARL13B_KAN508-7_2.tif:0006-0135	2.236	923.581	260	2310	78.909	21.761	0.347	2065.25	79428	5.649	0.177	0.738	2.35641
1247	ARL13B_KAN508-7_2.tif:0007-0164	1.326	647.039	314	1068	212.178	26.576	0.373	858.026	32999	5.955	0.168	0.739	0.978991
1248	ARL13B_KAN508-7_2.tif:0008-0347	0.494	421.211	303	602	17.962	56.034	0.394	208.091	8003	5.087	0.197	0.655	0.237427
1249	ARL13B_KAN508-7_2.tif:0009-0383	1.248	648.896	303	1072	160.79	61.668	0.653	809.871	31147	2.507	0.399	0.78	0.924047
1250	ARL13B_KAN508-7_2.tif:0010-0631	2.028	911.641	316	1967	120.367	101.786	0.527	1848.92	71108	3.954	0.253	0.8	2.10958
1251	ARL13B_KAN508-7_2.tif:0011-0641	1.3	520.96	214	1022	216.897	103.377	0.468	677.289	26048	2.949	0.339	0.654	0.772774
1252	ARL13B_KAN508-7_2.tif:0012-0652	1.482	567.298	312	1055	172.994	105.111	0.412	840.787	32336	5.242	0.191	0.74	0.959321
1253	ARL13B_KAN508-7_2.tif:0013-0827	1.014	383.641	301	528	159.644	133.401	0.704	389.035	14962	2.428	0.412	0.804	0.443882
1254	ARL13B_KAN508-7_2.tif:0014-0891	0.312	319.75	264	370	65.656	143.768	0.441	99.768	3837	4.827	0.207	0.686	0.113833
1269	ARL13B_KAN508-7_3.tif:0001-0008	0.286	379	314	462	25.749	1.312	0.494	108.401	4169	3.45	0.29	0.667	0.123683
1270	ARL13B_KAN508-7_3.tif:0002-0101	1.43	904.527	302	1933	120.332	16.338	0.542	1293.55	49749	3.946	0.253	0.764	1.47592
1271	ARL13B_KAN508-7_3.tif:0003-0106	2.028	952.487	301	2411	82.744	17.208	0.594	1931.76	74294	3.253	0.307	0.825	2.2041
1272	ARL13B_KAN508-7_3.tif:0004-0288	2.028	563.615	304	1032	98.716	46.49	0.641	1143.08	43962	3.002	0.333	0.839	1.30423
1273	ARL13B_KAN508-7_3.tif:0005-0319	0.546	512.762	304	785	74.839	51.443	0.707	279.985	10768	2.221	0.45	0.808	0.319457
1274	ARL13B_KAN508-7_3.tif:0006-0326	1.3	567.8	43	1339	32.305	52.719	0.315	738.184	28390	5.21	0.192	0.565	0.842254
1275	ARL13B_KAN508-7_3.tif:0007-0407	1.274	955.796	316	1665	122.749	65.663	0.531	1217.76	46834	3.941	0.254	0.797	1.38944
1276	ARL13B_KAN508-7_3.tif:0008-0530	0.676	444.923	311	655	107.975	85.45	0.36	300.786	11568	5.605	0.178	0.703	0.343191
1277	ARL13B_KAN508-7_3.tif:0009-0647	1.482	838.579	316	1496	131.491	104.31	0.606	1242.85	47799	3.409	0.293	0.838	1.41807
1278	ARL13B_KAN508-7_3.tif:0010-0649	0.468	416.556	301	538	46.333	104.624	0.317	194.96	7498	6.019	0.166	0.667	0.222445
1279	ARL13B_KAN508-7_3.tif:0011-0666	0.39	382.733	302	509	207.147	107.462	0.406	149.275	5741	4.552	0.22	0.638	0.17032
1280	ARL13B_KAN508-7_3.tif:0012-0756	1.118	391.047	266	633	3.504	122.226	0.282	437.216	16815	2.248	0.445	0.45	0.498855
1281	ARL13B_KAN508-7_3.tif:0013-0901	0.936	489.611	301	667	88.307	145.488	0.438	458.304	17626	4.612	0.217	0.742	0.522916
1282	ARL13B_KAN508-7_3.tif:0014-0919	1.248	606.708	314	962	189.727	148.128	0.45	757.218	29122	4.423	0.226	0.768	0.863971
1283	ARL13B_KAN508-7_3.tif:0015-1020	1.196	421.457	307	570	56.034	164.429	0.56	504.092	19387	3.457	0.289	0.829	0.57516
1299	ARL13B_KAN508-7_4.tif:0001-0038	0.546	829.048	308	1476	121.287	6.216	0.772	452.687	17410	2.494	0.401	0.933	0.516508
1300	ARL13B_KAN508-7_4.tif:0002-0111	2.21	494.953	159	1383	161.905	18.017	0.431	1093.91	42071	4.644	0.215	0.769	1.24813
1301	ARL13B_KAN508-7_4.tif:0003-0147	2.47	614.589	300	1854	128.943	23.895	0.407	1518.13	58386	4.473	0.224	0.706	1.73215
1302	ARL13B_KAN508-7_4.tif:0004-0232	1.196	456.109	307	620	12.416	37.414	0.304	545.539	20981	7.54	0.133	0.657	0.622449
1303	ARL13B_KAN508-7_4.tif:0005-0231	0.78	466.467	295	938	152.252	37.174	0.335	363.866	13994	4.452	0.225	0.645	0.415164
1304	ARL13B_KAN508-7_4.tif:0006-0308	0.78	434.467	139	668	181.412	49.719	0.769	338.904	13034	2.314	0.432	0.857	0.386683
1305	ARL13B_KAN508-7_4.tif:0007-0457	0.91	571.886	251	1098	81.088	73.85	0.59	520.447	20016	3.161	0.316	0.805	0.59382
1306	ARL13B_KAN508-7_4.tif:0008-0461	0.91	436.457	117	848	152.43	74.431	0.705	397.2	15276	1.909	0.524	0.745	0.453198
1307	ARL13B_KAN508-7_4.tif:0009-0552	1.014	558.103	334	907	26.509	89.024	0.454	565.95	21766	5.012	0.2	0.736	0.645738
1308	ARL13B_KAN508-7_4.tif:0010-0564	1.846	823.577	50	1596	163.341	91.26	0.379	1520.42	58474	4.465	0.224	0.703	1.73477
1309	ARL13B_KAN508-7_4.tif:0011-0620	0.988	742.421	256	1338	107.036	100.03	0.656	733.556	28212	2.18	0.459	0.768	0.836974
1310	ARL13B_KAN508-7_4.tif:0012-0732	0.572	398.773	309	538	22.531	118.101	0.629	228.112	8773	3.098	0.323	0.759	0.260271
1311	ARL13B_KAN508-7_4.tif:0013-0762	2.054	692.367	301	1700	148.825	122.745	0.398	1422.21	54697	3.499	0.286	0.605	1.62271
1312	ARL13B_KAN508-7_4.tif:0014-0881	0.676	431.192	307	617	45.417	142.278	0.383	291.504	11211	4.5	0.222	0.634	0.3326
1313	ARL13B_KAN508-7_4.tif:0015-1007	1.196	561.5	320	1095	103.922	162.305	0.429	671.594	25829	5.038	0.198	0.786	0.766276
1329	ARL13B_KAN508-7_5.tif:0001-0080	1.898	450.959	224	779	90.014	12.919	0.579	855.972	32920	3.392	0.295	0.807	0.976647
1330	ARL13B_KAN508-7_5.tif:0002-0127	1.196	602.348	304	1153	150.804	20.612	0.457	720.451	27708	4.569	0.219	0.76	0.822021
1331	ARL13B_KAN508-7_5.tif:0003-0187	1.508	688.259	114	1205	102.363	30.245	0.474	1037.96	39919	3.273	0.306	0.712	1.18429
1332	ARL13B_KAN508-7_5.tif:0004-0358	1.924	912.473	313	1785	141.97	57.854	0.608	1755.7	67523	3.219	0.311	0.818	2.00322
1333	ARL13B_KAN508-7_5.tif:0005-0777	1.222	389.83	303	507	96.367	125.211	0.51	476.401	18322	3.03	0.33	0.729	0.543564
1334	ARL13B_KAN508-7_5.tif:0006-0800	1.352	931.981	304	2270	151.764	128.985	0.636	1260.11	48463	3.042	0.329	0.782	1.43777
1335	ARL13B_KAN508-7_5.tif:0007-0834	2.028	1028.26	300	2021	196.128	134.491	0.451	2085.43	80204	4.637	0.216	0.817	2.37944
1336	ARL13B_KAN508-7_5.tif:0008-0829	0.962	799.649	304	1921	213.157	133.626	0.668	769.308	29587	1.934	0.517	0.771	0.877766
1337	ARL13B_KAN508-7_5.tif:0009-0928	1.794	825.174	307	1685	222.603	149.637	0.56	1480.45	56937	3.25	0.308	0.754	1.68917
1338	ARL13B_KAN508-7_5.tif:0010-0975	2.834	1055.21	306	3757	145.203	157.301	0.508	2990.65	115018	3.614	0.277	0.712	3.41227
1339	ARL13B_KAN508-7_5.tif:0011-0970	0.676	406.692	308	570	84.433	156.506	0.572	274.941	10574	3.414	0.293	0.897	0.313702
1340	ARL13B_KAN508-7_5.tif:0012-0974	1.404	1189.24	288	2982	93.543	157.192	0.735	1669.8	64219	2.432	0.411	0.837	1.9052
1353	ARL13B_KAN508-7_6.tif:0001-0051	0.728	279.893	101	439	88.624	8.126	0.515	203.774	7837	1.988	0.503	0.659	0.232503
1354	ARL13B_KAN508-7_6.tif:0002-0079	2.132	884.561	314	1778	219.575	12.808	0.59	1886	72534	3.211	0.311	0.832	2.15189
1355	ARL13B_KAN508-7_6.tif:0003-0222	1.17	894.378	322	2509	76.699	35.896	0.663	1046.48	40247	2.81	0.356	0.796	1.19402
1356	ARL13B_KAN508-7_6.tif:0004-0229	1.43	468.909	301	884	104.928	37.057	0.469	670.58	25790	3.834	0.261	0.786	0.765119
1357	ARL13B_KAN508-7_6.tif:0005-0363	0.702	480.667	300	681	168.951	58.429	0.79	337.448	12978	1.433	0.698	0.844	0.385022
1358	ARL13B_KAN508-7_6.tif:0006-0421	1.248	674.375	303	1503	49.652	68.088	0.639	841.671	32370	2.909	0.344	0.889	0.96033
1359	ARL13B_KAN508-7_6.tif:0007-0436	1.664	1611.09	313	3821	118.458	70.295	0.719	2681.02	103110	2.522	0.397	0.831	3.05899
1360	ARL13B_KAN508-7_6.tif:0008-0443	0.26	332.5	297	369	27.735	71.466	0.368	86.455	3325	4.18	0.239	0.667	0.0986437
1361	ARL13B_KAN508-7_6.tif:0009-0456	0.338	333.538	304	392	26.885	73.635	0.255	112.743	4336	6.706	0.149	0.542	0.128637
1362	ARL13B_KAN508-7_6.tif:0010-0623	2.782	570.626	300	981	122.386	100.434	0.522	1587.58	61057	3.931	0.254	0.836	1.8114
1363	ARL13B_KAN508-7_6.tif:0011-0694	1.092	698.619	318	1187	199.205	112.042	0.563	762.938	29342	3.105	0.322	0.771	0.870498
1364	ARL13B_KAN508-7_6.tif:0012-0966	0.806	680.548	318	1141	200.774	155.9	0.608	548.555	21097	2.733	0.366	0.849	0.625891
1365	ARL13B_KAN508-7_6.tif:0013-0966	0.39	381.6	303	462	170.855	155.816	0.449	148.833	5724	4.239	0.236	0.769	0.169816
										33003.7				0.979132
1379	ARL13B_KAN508-8_1.tif:0001-0011	0.988	492.263	245	789	147.433	1.774	0.579	486.385	18706	3.258	0.307	0.864	0.554956
1380	ARL13B_KAN508-8_1.tif:0002-0093	1.586	1141.08	327	3219	166.773	15.011	0.731	1809.87	69606	2.166	0.462	0.841	2.06502
1381	ARL13B_KAN508-8_1.tif:0003-0152	1.17	396	284	606	201.661	24.318	0.357	463.348	17820	5.117	0.195	0.652	0.528671
1382	ARL13B_KAN508-8_1.tif:0004-0210	1.014	418.436	300	604	111.203	33.894	0.495	424.32	16319	3.874	0.258	0.78	0.48414
1383	ARL13B_KAN508-8_1.tif:0005-0218	1.118	586.256	320	1023	77.158	35.166	0.526	655.473	25209	3.758	0.266	0.768	0.747883
1384	ARL13B_KAN508-8_1.tif:0006-0325	1.118	377.907	302	574	18.861	52.378	0.271	422.525	16250	7.035	0.142	0.662	0.482093
1385	ARL13B_KAN508-8_1.tif:0007-0377	1.144	454.864	303	667	120.369	60.802	0.675	520.395	20014	2.92	0.342	0.815	0.593761
1386	ARL13B_KAN508-8_1.tif:0008-0402	2.21	698.259	94	1702	187.457	64.913	0.496	1543.24	59352	3.509	0.285	0.759	1.76081
1387	ARL13B_KAN508-8_1.tif:0009-0447	1.768	975.912	301	2138	219.717	72.169	0.629	1725.52	66362	2.796	0.358	0.824	1.96878
1388	ARL13B_KAN508-8_1.tif:0010-0598	0.442	354.294	306	476	155.051	96.385	0.514	156.607	6023	3.827	0.261	0.667	0.178686
1389	ARL13B_KAN508-8_1.tif:0011-0600	1.092	445.167	300	603	209.352	96.838	0.585	486.151	18697	3.541	0.282	0.778	0.554689
1390	ARL13B_KAN508-8_1.tif:0012-0620	0.806	491.935	306	958	84.061	100.232	0.422	396.524	15250	3.537	0.283	0.639	0.452426
1391	ARL13B_KAN508-8_1.tif:0013-0636	1.118	482.302	301	657	43.581	102.336	0.353	539.246	20739	5.074	0.197	0.614	0.61527
1392	ARL13B_KAN508-8_1.tif:0014-0642	1.508	1041.05	311	2622	100.395	103.464	0.748	1570	60381	1.661	0.602	0.817	1.79134
1393	ARL13B_KAN508-8_1.tif:0015-0749	1.482	706.509	303	1661	14.718	120.964	0.474	1047.11	40271	3.927	0.255	0.699	1.19473
1394	ARL13B_KAN508-8_1.tif:0016-0769	2.6	870.25	39	2290	76.618	123.958	0.421	2262.79	87025	4.566	0.219	0.763	2.5818
1395	ARL13B_KAN508-8_1.tif:0017-0904	1.456	696.821	305	1853	95.687	145.891	0.361	1014.63	39022	6.081	0.164	0.727	1.15768
1413	ARL13B_KAN508-8_2.tif:0001-0063	1.716	662.152	304	1249	204.091	10.071	0.317	1136.32	43702	6.332	0.158	0.737	1.29652
1414	ARL13B_KAN508-8_2.tif:0002-0076	1.144	1021.77	322	2019	21.662	12.339	0.589	1168.98	44958	3.36	0.298	0.779	1.33378
1415	ARL13B_KAN508-8_2.tif:0003-0116	1.248	897.354	309	1648	58.964	18.829	0.668	1119.96	43073	2.758	0.363	0.774	1.27786
1416	ARL13B_KAN508-8_2.tif:0004-0149	1.326	497.039	300	786	118.919	24.047	0.542	659.114	25349	3.455	0.289	0.816	0.752036
1417	ARL13B_KAN508-8_2.tif:0005-0226	2.132	908.207	312	2100	80.857	36.444	0.768	1936.41	74473	1.879	0.532	0.882	2.20941
1418	ARL13B_KAN508-8_2.tif:0006-0239	1.612	683.968	309	1187	108.995	38.627	0.498	1102.62	42406	4.301	0.232	0.821	1.25807
1419	ARL13B_KAN508-8_2.tif:0007-0304	1.586	523.885	233	820	20.184	49.156	0.505	830.932	31957	3.799	0.263	0.803	0.948078
1420	ARL13B_KAN508-8_2.tif:0008-0323	1.768	718.544	286	1289	62.608	51.989	0.432	1270.46	48861	5.571	0.18	0.919	1.44957
1421	ARL13B_KAN508-8_2.tif:0009-0434	1.638	764.286	179	1613	97.903	70.002	0.494	1251.97	48150	2.886	0.347	0.692	1.42848
1422	ARL13B_KAN508-8_2.tif:0010-0539	1.846	745.493	305	1282	66.293	86.933	0.656	1376.26	52930	2.889	0.346	0.83	1.57029
1423	ARL13B_KAN508-8_2.tif:0011-0557	1.846	876.324	226	1652	196.928	89.979	0.547	1617.79	62219	3.51	0.285	0.83	1.84587
1424	ARL13B_KAN508-8_2.tif:0012-0576	1.456	605.179	312	1054	145.007	92.817	0.373	881.193	33890	5.279	0.189	0.659	1.00542
1425	ARL13B_KAN508-8_2.tif:0013-0631	1.17	620.378	305	988	38.72	101.729	0.465	725.886	27917	4.529	0.221	0.732	0.828222
1426	ARL13B_KAN508-8_2.tif:0014-0633	1.846	652.493	249	1615	84.737	102.202	0.517	1204.58	46327	4.268	0.234	0.877	1.3744
1427	ARL13B_KAN508-8_2.tif:0015-0643	1.586	628.311	165	1151	98.602	103.735	0.457	996.562	38327	4.528	0.221	0.787	1.13706
1428	ARL13B_KAN508-8_2.tif:0016-0774	1.248	415.458	308	585	212.003	124.885	0.289	518.523	19942	6.856	0.146	0.585	0.591625
1429	ARL13B_KAN508-8_2.tif:0017-0790	0.572	398.818	308	502	119.56	127.534	0.484	228.138	8774	4.924	0.203	0.8	0.260301
1430	ARL13B_KAN508-8_2.tif:0018-0883	0.988	644.526	302	1133	197.684	142.435	0.498	636.83	24492	4.084	0.245	0.784	0.726611
1431	ARL13B_KAN508-8_2.tif:0019-0959	0.364	358.786	300	441	112.933	154.627	0.472	130.606	5023	4.096	0.244	0.718	0.149019
1451	ARL13B_KAN508-8_3.tif:0001-0072	1.534	631.78	130	1230	163.301	11.617	0.761	969.208	37275	1.347	0.743	0.792	1.10585
1452	ARL13B_KAN508-8_3.tif:0002-0103	1.066	824.39	322	1920	220.726	16.63	0.74	878.853	33800	2.329	0.429	0.828	1.00275
1453	ARL13B_KAN508-8_3.tif:0003-0113	1.196	889.63	302	2359	93.283	18.2	0.651	1064.06	40923	2.729	0.366	0.793	1.21407
1454	ARL13B_KAN508-8_3.tif:0004-0136	1.846	438.817	300	668	32.031	21.899	0.313	810.105	31156	5.949	0.168	0.645	0.924314
1455	ARL13B_KAN508-8_3.tif:0005-0448	1.092	430.905	300	579	37.944	72.282	0.426	470.576	18098	5.3	0.189	0.75	0.536919
1456	ARL13B_KAN508-8_3.tif:0006-0458	1.586	798.393	304	1567	70.108	73.851	0.424	1266.33	48702	4.947	0.202	0.722	1.44486
1457	ARL13B_KAN508-8_3.tif:0007-0538	1.092	500.357	321	836	58.756	86.975	0.417	546.423	21015	4.528	0.221	0.73	0.623458
1458	ARL13B_KAN508-8_3.tif:0008-0588	1.118	753.023	317	1436	158.496	94.836	0.619	841.931	32380	3.244	0.308	0.811	0.960627
1459	ARL13B_KAN508-8_3.tif:0009-0611	1.274	460.816	305	647	101.201	98.575	0.55	587.115	22580	3.717	0.269	0.754	0.669887
1460	ARL13B_KAN508-8_3.tif:0010-0768	0.832	535.25	306	1068	27.196	123.769	0.71	445.355	17128	2.006	0.498	0.744	0.508141
1461	ARL13B_KAN508-8_3.tif:0011-0884	0.884	442.118	301	645	121.914	142.526	0.489	390.856	15032	4.2	0.238	0.756	0.445959
1462	ARL13B_KAN508-8_3.tif:0012-1014	1.092	474	309	691	44.601	163.607	0.356	517.639	19908	6.363	0.157	0.875	0.590616
1463	ARL13B_KAN508-8_3.tif:0013-1019	0.286	342.273	302	375	129.638	164.336	0.443	97.896	3765	4.264	0.235	0.815	0.111697
1477	ARL13B_KAN508-8_4.tif:0001-0059	0.962	824.568	311	1494	98.447	9.538	0.668	793.282	30509	2.783	0.359	0.804	0.905119
1478	ARL13B_KAN508-8_4.tif:0002-0148	0.39	355.867	257	459	141.454	23.881	0.694	138.796	5338	2.503	0.399	0.833	0.158364
1479	ARL13B_KAN508-8_4.tif:0003-0286	1.508	765.931	302	1875	3.4	46.181	0.504	1155.09	44424	3.247	0.308	0.699	1.31794
1480	ARL13B_KAN508-8_4.tif:0004-0300	2.34	673.944	303	1920	126.076	48.526	0.483	1577.12	60655	4.404	0.227	0.807	1.79947
1481	ARL13B_KAN508-8_4.tif:0005-0410	1.222	687.915	248	1149	95.252	66.145	0.532	840.683	32332	4.209	0.238	0.879	0.959203
1482	ARL13B_KAN508-8_4.tif:0006-0468	1.404	767.944	309	1428	156.027	75.444	0.54	1078.26	41469	3.483	0.287	0.735	1.23027
1483	ARL13B_KAN508-8_4.tif:0007-0533	0.312	397.083	319	493	36.483	85.987	0.579	123.897	4765	3.369	0.297	0.667	0.141365
1484	ARL13B_KAN508-8_4.tif:0008-0539	2.366	1297.13	290	3781	188.46	86.807	0.629	3069.2	118039	2.545	0.393	0.839	3.5019
1485	ARL13B_KAN508-8_4.tif:0009-0563	1.066	464.951	310	867	151.955	90.821	0.291	495.668	19063	7.444	0.134	0.631	0.565548
1486	ARL13B_KAN508-8_4.tif:0010-0650	1.378	551.528	282	964	216.758	104.832	0.431	760.052	29231	5.252	0.19	0.855	0.867205
1487	ARL13B_KAN508-8_4.tif:0011-0746	0.936	554.917	301	993	61.799	120.373	0.776	519.433	19977	2.1	0.476	0.857	0.592663
1488	ARL13B_KAN508-8_4.tif:0012-0896	0.988	479.105	291	695	149.975	144.501	0.487	473.385	18206	4.494	0.223	0.826	0.540123
1489	ARL13B_KAN508-8_4.tif:0013-0908	0.754	413.31	257	617	43.891	146.546	0.358	311.655	11986	5.354	0.187	0.795	0.355592
1503	ARL13B_KAN508-8_5.tif:0001-0122	1.768	730.647	315	1761	5.475	19.739	0.455	1291.86	49684	4.816	0.208	0.768	1.47399
1504	ARL13B_KAN508-8_5.tif:0002-0156	0.702	330.556	269	385	53.484	25.265	0.312	232.064	8925	4.957	0.202	0.587	0.264781
1505	ARL13B_KAN508-8_5.tif:0003-0189	1.69	714.908	304	1407	96.766	30.413	0.464	1208.27	46469	4.669	0.214	0.783	1.37861
1506	ARL13B_KAN508-8_5.tif:0004-0210	1.898	717.466	322	1515	61.263	34.069	0.249	1361.83	52375	8.305	0.12	0.621	1.55382
1507	ARL13B_KAN508-8_5.tif:0005-0386	2.002	731.377	234	1651	168.078	62.285	0.686	1464.3	56316	2.852	0.351	0.917	1.67074
1508	ARL13B_KAN508-8_5.tif:0006-0395	1.352	454.327	304	890	30.727	63.74	0.348	614.287	23625	5.847	0.171	0.634	0.70089
1509	ARL13B_KAN508-8_5.tif:0007-0514	1.274	500.388	300	828	121.281	82.891	0.656	637.532	24519	2.798	0.357	0.824	0.727412
1510	ARL13B_KAN508-8_5.tif:0008-0541	2.106	643.58	301	1221	86.867	87.267	0.542	1355.46	52130	3.808	0.263	0.818	1.54656
1511	ARL13B_KAN508-8_5.tif:0009-0546	1.326	1169.23	305	2587	202.949	88.164	0.71	1550.5	59631	2.572	0.389	0.823	1.76909
1512	ARL13B_KAN508-8_5.tif:0010-0575	0.988	566.921	311	877	47.637	92.604	0.349	560.152	21543	5.72	0.175	0.71	0.639122
1513	ARL13B_KAN508-8_5.tif:0011-0581	1.066	434.585	309	763	166.904	93.755	0.46	463.296	17818	4.087	0.245	0.726	0.528612
1514	ARL13B_KAN508-8_5.tif:0012-0793	1.586	622.492	301	1366	147.204	127.878	0.484	987.331	37972	4.349	0.23	0.787	1.12653
1515	ARL13B_KAN508-8_5.tif:0013-0806	1.924	570.703	301	885	211.506	130.118	0.363	1098.1	42232	6.044	0.165	0.771	1.25291
1516	ARL13B_KAN508-8_5.tif:0014-0819	1.482	536.404	301	1162	11.866	132.068	0.489	794.998	30575	4.276	0.234	0.792	0.907077
1517	ARL13B_KAN508-8_5.tif:0015-0869	1.274	624.245	312	1057	112.103	140.036	0.478	795.336	30588	4.62	0.216	0.867	0.907463
1518	ARL13B_KAN508-8_5.tif:0016-0880	1.04	355.45	255	479	202.853	142.339	0.161	369.69	14218	10.781	0.093	0.544	0.42181
1519	ARL13B_KAN508-8_5.tif:0017-0919	0.806	433.387	312	594	70.458	148.113	0.249	349.331	13435	7.671	0.13	0.596	0.39858
1520	ARL13B_KAN508-8_5.tif:0018-0969	0.884	573.735	291	901	89.759	156.247	0.563	507.213	19507	3.504	0.285	0.764	0.57872
1521	ARL13B_KAN508-8_5.tif:0019-1018	1.196	640.717	331	1184	36.733	164.195	0.431	766.344	29473	3.664	0.273	0.648	0.874384
1541	ARL13B_KAN508-8_6.tif:0001-0054	0.442	360.235	304	423	109.541	8.788	0.313	159.234	6124	6.097	0.164	0.586	0.181682
1542	ARL13B_KAN508-8_6.tif:0002-0246	0.546	383.143	291	541	98.781	39.556	0.354	209.209	8046	4.709	0.212	0.689	0.238703
1543	ARL13B_KAN508-8_6.tif:0003-0253	1.482	537.439	300	840	134.976	40.806	0.527	796.532	30634	3.842	0.26	0.792	0.908828
1544	ARL13B_KAN508-8_6.tif:0004-0305	1.43	798.327	305	1668	45.222	49.262	0.518	1141.68	43908	3.95	0.253	0.753	1.30263
1545	ARL13B_KAN508-8_6.tif:0005-0395	1.95	902.227	306	1749	99.006	63.71	0.536	1759.45	67667	3.853	0.26	0.798	2.0075
1546	ARL13B_KAN508-8_6.tif:0006-0403	0.806	481.871	302	686	50.505	65.08	0.4	388.411	14938	5.008	0.2	0.66	0.44317
1547	ARL13B_KAN508-8_6.tif:0007-0459	0.936	408.889	304	588	32.425	74.009	0.561	382.743	14720	3.524	0.284	0.727	0.436703
1548	ARL13B_KAN508-8_6.tif:0008-0516	1.846	739.423	305	1352	76.188	83.277	0.563	1365.06	52499	3.207	0.312	0.802	1.5575
1549	ARL13B_KAN508-8_6.tif:0009-0534	1.404	544.37	3	1147	180.409	86.122	0.309	764.342	29396	4.068	0.246	0.537	0.8721
1550	ARL13B_KAN508-8_6.tif:0010-0593	1.768	567.118	291	917	95.453	95.647	0.465	1002.72	38564	4.457	0.224	0.791	1.14409
1551	ARL13B_KAN508-8_6.tif:0011-0727	1.3	792.44	309	1503	16.502	117.313	0.466	1030.23	39622	4.556	0.219	0.833	1.17548
1552	ARL13B_KAN508-8_6.tif:0012-0892	1.092	564.738	300	954	7.598	143.762	0.683	616.731	23719	1.939	0.516	0.832	0.703678
1553	ARL13B_KAN508-8_6.tif:0013-0894	1.196	614.783	305	1256	68.903	144.108	0.603	735.324	28280	2.67	0.375	0.829	0.838991
1554	ARL13B_KAN508-8_6.tif:0014-0905	1.482	527.754	173	1019	121.114	145.95	0.508	782.179	30082	4.221	0.237	0.844	0.892451
1555	ARL13B_KAN508-8_6.tif:0015-1035	0.598	482.783	293	676	72.559	166.974	0.405	288.721	11104	4.17	0.24	0.73	0.329426
										32999.1				0.978993
1571	ARL13B_KAN508-9_1.tif:0001-0007	0.624	535.25	346	771	132.191	1.055	0.762	334.016	12846	2.223	0.45	0.873	0.381106
1572	ARL13B_KAN508-9_1.tif:0002-0107	1.976	580.224	279	1124	107.827	17.188	0.517	1146.59	44097	4.361	0.229	0.844	1.30824
1573	ARL13B_KAN508-9_1.tif:0003-0209	1.378	527.585	262	794	52.937	33.782	0.365	727.056	27962	6.441	0.155	0.774	0.829557
1574	ARL13B_KAN508-9_1.tif:0004-0360	1.69	559.815	264	958	125.335	58.054	0.701	946.145	36388	2.407	0.416	0.85	1.07953
1575	ARL13B_KAN508-9_1.tif:0005-0482	0.312	345.083	301	418	37.464	77.817	0.623	107.672	4141	3.636	0.275	0.727	0.122852
1576	ARL13B_KAN508-9_1.tif:0006-0621	0.52	388.65	319	487	14.19	100.209	0.466	202.11	7773	4.371	0.229	0.656	0.230604
1577	ARL13B_KAN508-9_1.tif:0007-0793	1.456	492.375	303	706	128.767	127.955	0.303	716.941	27573	7.726	0.129	0.679	0.818016
1578	ARL13B_KAN508-9_1.tif:0008-1011	1.118	391.442	243	568	60.309	163.018	0.555	437.658	16832	1.963	0.509	0.688	0.49936
1579	ARL13B_KAN508-9_1.tif:0009-1016	0.624	377.417	306	494	34.615	163.803	0.686	235.522	9058	2.656	0.377	0.8	0.268726
1589	ARL13B_KAN508-9_2.tif:0001-0526	1.898	817.89	300	1678	139.147	84.792	0.521	1552.45	59706	3.776	0.265	0.753	1.77132
1590	ARL13B_KAN508-9_2.tif:0002-0545	1.56	1341.93	311	3175	105.146	87.819	0.698	2093.54	80516	2.478	0.404	0.839	2.38869
1591	ARL13B_KAN508-9_2.tif:0003-0665	0.416	339.812	304	402	126.148	107.141	0.398	141.371	5437	5.159	0.194	0.744	0.161301
1592	ARL13B_KAN508-9_2.tif:0004-0701	1.378	571.774	243	969	50.315	112.998	0.408	787.951	30304	5.31	0.188	0.731	0.899038
1593	ARL13B_KAN508-9_2.tif:0005-0714	1.664	503.875	310	815	92.573	115.125	0.795	838.498	32248	1.978	0.505	0.877	0.956711
1594	ARL13B_KAN508-9_2.tif:0006-0721	1.794	785.696	310	1559	219.434	116.234	0.466	1409.62	54213	4.514	0.222	0.775	1.60835
1595	ARL13B_KAN508-9_2.tif:0007-0774	1.43	551.982	301	1068	199.21	124.794	0.354	789.382	30359	6.202	0.161	0.647	0.900669
1596	ARL13B_KAN508-9_2.tif:0008-0893	1.144	643.045	286	1228	103.618	144.037	0.519	735.688	28294	3.079	0.325	0.682	0.839406
1605	ARL13B_KAN508-9_3.tif:0001-0102	1.066	548.122	303	1064	194.761	16.532	0.517	584.333	22473	3.701	0.27	0.759	0.666713
1606	ARL13B_KAN508-9_3.tif:0002-0133	0.598	355.826	288	449	67.231	21.632	0.378	212.797	8184	6.185	0.162	0.939	0.242797
1607	ARL13B_KAN508-9_3.tif:0003-0203	1.222	508.723	292	808	144.214	32.907	0.704	621.697	23910	1.823	0.549	0.803	0.709345
1608	ARL13B_KAN508-9_3.tif:0004-0261	1.456	573.214	302	1283	217.48	42.17	0.508	834.65	32100	3.871	0.258	0.742	0.95232
1609	ARL13B_KAN508-9_3.tif:0005-0452	1.196	748.5	305	1357	81.298	72.829	0.636	895.26	34431	2.908	0.344	0.844	1.02147
1610	ARL13B_KAN508-9_3.tif:0006-0598	0.858	405.697	302	536	65.46	96.621	0.319	348.109	13388	4.872	0.205	0.545	0.397186
1611	ARL13B_KAN508-9_3.tif:0007-0727	0.286	354.636	301	424	76.293	117.28	0.78	101.432	3901	2.134	0.469	0.759	0.115732
1619	ARL13B_KAN508-9_4.tif:0001-0028	1.638	497.778	302	855	110.762	4.644	0.547	815.409	31360	3.598	0.278	0.813	0.930366
1620	ARL13B_KAN508-9_4.tif:0002-0106	2.21	699.176	310	1328	217.688	17.27	0.384	1545.27	59430	5.262	0.19	0.749	1.76313
1621	ARL13B_KAN508-9_4.tif:0003-0467	0.312	394.083	304	516	120.991	75.263	0.579	122.961	4729	3.574	0.28	0.686	0.140297
1622	ARL13B_KAN508-9_4.tif:0004-0708	1.56	530.25	302	847	20.1	114.254	0.317	827.24	31815	6.461	0.155	0.686	0.943865
1623	ARL13B_KAN508-9_4.tif:0005-0711	0.286	333.091	300	381	3.335	114.773	0.715	95.27	3664	2.127	0.47	0.786	0.108701
1624	ARL13B_KAN508-9_4.tif:0006-0755	0.286	387.091	307	503	54.906	121.766	0.637	110.715	4258	3.125	0.32	0.71	0.126323
1625	ARL13B_KAN508-9_4.tif:0007-0875	0.494	415.421	328	551	119.507	141.106	0.514	205.23	7893	3.693	0.271	0.731	0.234164
1633	ARL13B_KAN508-9_5.tif:0001-0111	1.118	591.977	300	1213	218.709	17.893	0.762	661.87	25455	2.256	0.443	0.819	0.755181
1634	ARL13B_KAN508-9_5.tif:0002-0249	1.43	424.273	301	678	42.346	40.018	0.588	606.747	23335	3.217	0.311	0.797	0.692286
1635	ARL13B_KAN508-9_5.tif:0003-0266	1.404	717.204	309	1251	52.78	42.907	0.529	1007.01	38729	3.753	0.266	0.794	1.14898
1636	ARL13B_KAN508-9_5.tif:0004-0390	1.3	487.54	305	900	104.284	62.897	0.612	633.84	24377	3.035	0.329	0.787	0.7232
1637	ARL13B_KAN508-9_5.tif:0005-0393	1.846	1251.09	305	3357	197.98	63.477	0.792	2309.64	88827	1.791	0.558	0.887	2.63526
1638	ARL13B_KAN508-9_5.tif:0006-0912	0.884	394.588	300	543	91.495	147.164	0.439	348.837	13416	4.855	0.206	0.723	0.398016
1645	ARL13B_KAN508-9_6.tif:0001-0027	1.638	486.032	305	752	74.698	4.352	0.561	796.168	30620	3.005	0.333	0.851	0.908412
1646	ARL13B_KAN508-9_6.tif:0002-0030	0.676	320.385	251	357	118.32	4.757	0.348	216.593	8330	5.659	0.177	0.584	0.247129
1647	ARL13B_KAN508-9_6.tif:0003-0030	1.17	484.311	276	742	150.853	4.836	0.389	566.678	21794	5.391	0.185	0.763	0.646569
1648	ARL13B_KAN508-9_6.tif:0004-0089	1.664	578.5	301	1120	52.648	14.371	0.719	962.682	37024	2.276	0.439	0.831	1.0984
1649	ARL13B_KAN508-9_6.tif:0005-0190	0.572	341.455	163	456	106.242	30.667	0.387	195.324	7512	4.965	0.201	0.677	0.222861
1650	ARL13B_KAN508-9_6.tif:0006-0212	1.274	402.612	290	518	160.08	34.19	0.357	512.959	19728	5.203	0.192	0.754	0.585276
1651	ARL13B_KAN508-9_6.tif:0007-0352	1.586	587.164	302	992	147.616	56.843	0.61	931.298	35817	2.581	0.387	0.782	1.06259
1652	ARL13B_KAN508-9_6.tif:0008-0451	1.352	599.365	307	884	193.463	72.826	0.792	810.391	31167	2.014	0.497	0.897	0.92464
1653	ARL13B_KAN508-9_6.tif:0009-0483	0.624	404.167	298	520	65.662	77.897	0.493	252.215	9700	4.349	0.23	0.762	0.287773
1654	ARL13B_KAN508-9_6.tif:0010-0620	1.196	507.913	61	1133	4.417	100.077	0.369	607.501	23364	5.21	0.192	0.73	0.693147
1655	ARL13B_KAN508-9_6.tif:0011-0624	1.794	656.928	311	1101	171.482	100.602	0.69	1178.6	45328	2.383	0.42	0.807	1.34476
1656	ARL13B_KAN508-9_6.tif:0012-0638	1.456	578.625	312	1145	188.806	102.97	0.452	842.529	32403	4.151	0.241	0.7	0.961309
1657	ARL13B_KAN508-9_6.tif:0013-0644	1.326	448.902	300	686	198.962	103.704	0.694	595.28	22894	2.14	0.467	0.864	0.679203
1658	ARL13B_KAN508-9_6.tif:0014-0645	1.456	870.768	303	2191	141.174	104.104	0.625	1267.91	48763	3.57	0.28	0.868	1.44667
1659	ARL13B_KAN508-9_6.tif:0015-0820	1.456	486.661	300	880	166.997	132.297	0.508	708.621	27253	3.192	0.313	0.757	0.808523
1660	ARL13B_KAN508-9_6.tif:0016-0919	1.196	632.065	321	1148	202.137	148.266	0.412	755.996	29075	5.035	0.199	0.708	0.862576
1661	ARL13B_KAN508-9_6.tif:0017-0926	0.806	793.226	333	1624	193.362	149.507	0.625	639.379	24590	2.724	0.367	0.775	0.729519
1662	ARL13B_KAN508-9_6.tif:0018-0981	1.248	574.896	321	942	132.171	158.21	0.707	717.513	27595	2.571	0.389	0.828	0.818669
										27025.1				0.801761
1	ARL13B_KAN508-10_1.tif:0001-0051	0.39	366.933	308	470	172.554	8.283	0.746	143.113	5504	2.125	0.471	0.789	0.163289				8	Ac-Tub_KAN508-10_1.tif:0001-0051	0.39	573.4	224	924	172.554	8.283	0.746	223.639	8601	2.125	0.471	0.789
2	ARL13B_KAN508-10_1.tif:0002-0178	0.65	418.76	311	793	86.653	28.564	0.306	272.21	10469	6.631	0.151	0.602	0.310587				9	Ac-Tub_KAN508-10_1.tif:0002-0178	0.65	303.32	87	879	86.653	28.564	0.306	197.17	7583	6.631	0.151	0.602
3	ARL13B_KAN508-10_1.tif:0003-0502	1.924	641.216	309	1127	24.336	81.074	0.425	1233.77	47450	5.029	0.199	0.744	1.40771				10	Ac-Tub_KAN508-10_1.tif:0003-0502	1.924	799.703	60	2240	24.336	81.074	0.425	1538.72	59178	5.029	0.199	0.744
4	ARL13B_KAN508-10_1.tif:0004-0621	0.832	576.938	153	1118	158.967	100.242	0.563	480.041	18462	3.407	0.294	0.78	0.547718				11	Ac-Tub_KAN508-10_1.tif:0004-0621	0.832	488.188	0	2008	158.967	100.242	0.563	406.196	15622	3.407	0.294	0.78
5	ARL13B_KAN508-10_1.tif:0005-0731	1.586	728.607	215	1630	187.165	117.917	0.511	1155.64	44445	4.031	0.248	0.853	1.31856				12	Ac-Tub_KAN508-10_1.tif:0005-0731	1.586	398.525	0	2753	187.165	117.917	0.511	632.098	24310	4.031	0.248	0.853
6	ARL13B_KAN508-10_1.tif:0006-0775	0.676	354.962	145	514	126.24	125.08	0.76	239.968	9229	1.979	0.505	0.812	0.273799				13	Ac-Tub_KAN508-10_1.tif:0006-0775	0.676	783.654	429	1743	126.24	125.08	0.76	529.782	20375	1.979	0.505	0.812
7	ARL13B_KAN508-10_1.tif:0007-0911	1.352	691.981	332	1346	51.764	146.992	0.408	935.614	35983	5.07	0.197	0.693	1.06752				14	Ac-Tub_KAN508-10_1.tif:0007-0911	1.352	633.115	69	1614	51.764	146.992	0.408	856.024	32922	5.07	0.197	0.693
15	ARL13B_KAN508-10_2.tif:0001-0472	2.418	653.581	301	1134	101.946	76.071	0.764	1580.45	60783	1.929	0.518	0.865	1.80327				19	Ac-Tub_KAN508-10_2.tif:0001-0472	2.418	628.892	0	2496	101.946	76.071	0.764	1520.75	58487	1.929	0.518	0.865
16	ARL13B_KAN508-10_2.tif:0002-0556	1.56	767.683	311	1455	122.757	89.687	0.757	1197.66	46061	2.215	0.451	0.857	1.36651				20	Ac-Tub_KAN508-10_2.tif:0002-0556	1.56	456.667	0	1545	122.757	89.687	0.757	712.443	27400	2.215	0.451	0.857
17	ARL13B_KAN508-10_2.tif:0003-0564	1.144	625.227	320	1148	42.969	90.967	0.576	715.303	27510	3.531	0.283	0.8	0.816147				21	Ac-Tub_KAN508-10_2.tif:0003-0564	1.144	541.409	150	1187	42.969	90.967	0.576	619.409	23822	3.531	0.283	0.8
18	ARL13B_KAN508-10_2.tif:0004-0663	0.936	568.444	304	982	138.469	106.958	0.438	532.096	20464	4.992	0.2	0.774	0.607111				22	Ac-Tub_KAN508-10_2.tif:0004-0663	0.936	313.861	3	1334	138.469	106.958	0.438	293.792	11299	4.992	0.2	0.774
23	ARL13B_KAN508-10_3.tif:0001-0183	2.99	601.426	0	2398	113.742	29.601	0.633	1798.37	69164	1.877	0.533	0.824	2.05191				29	Ac-Tub_KAN508-10_3.tif:0001-0183	2.99	629.939	0	2466	113.742	29.601	0.633	1883.63	72443	1.877	0.533	0.824
24	ARL13B_KAN508-10_3.tif:0002-0333	1.846	777.465	333	2253	167.015	53.802	0.563	1435.29	55200	3.416	0.293	0.826	1.63763				30	Ac-Tub_KAN508-10_3.tif:0002-0333	1.846	823.859	0	3089	167.015	53.802	0.563	1520.94	58494	3.416	0.293	0.826
25	ARL13B_KAN508-10_3.tif:0003-0434	1.066	402.512	289	635	31.595	70.142	0.481	429.104	16503	3.754	0.266	0.759	0.489599				31	Ac-Tub_KAN508-10_3.tif:0003-0434	1.066	826.732	151	2096	31.595	70.142	0.481	881.349	33896	3.754	0.266	0.759
26	ARL13B_KAN508-10_3.tif:0004-0476	1.222	502.489	308	968	102.677	76.743	0.432	614.079	23617	4.346	0.23	0.74	0.700652				32	Ac-Tub_KAN508-10_3.tif:0004-0476	1.222	345.596	46	796	102.677	76.743	0.432	422.343	16243	4.346	0.23	0.74
27	ARL13B_KAN508-10_3.tif:0005-0720	1.898	1241	300	2749	58.153	116.002	0.776	2355.56	90593	1.927	0.519	0.885	2.68765				33	Ac-Tub_KAN508-10_3.tif:0005-0720	1.898	1422.64	0	3523	58.153	116.002	0.776	2700.34	103853	1.927	0.519	0.885
28	ARL13B_KAN508-10_3.tif:0006-0851	1.248	783.104	304	1370	120.978	137.278	0.597	977.373	37589	2.928	0.342	0.807	1.11516				34	Ac-Tub_KAN508-10_3.tif:0006-0851	1.248	765.583	48	2046	120.978	137.278	0.597	955.506	36748	2.928	0.342	0.807
35	ARL13B_KAN508-10_4.tif:0001-0069	0.728	648.143	323	1154	4.244	11.207	0.702	471.876	18148	2.918	0.343	0.812	0.538402				40	Ac-Tub_KAN508-10_4.tif:0001-0069	0.728	986.5	152	2007	4.244	11.207	0.702	718.215	27622	2.918	0.343	0.812
36	ARL13B_KAN508-10_4.tif:0002-0187	1.066	414.268	311	552	202.776	30.191	0.529	441.637	16985	3.687	0.271	0.766	0.503899				41	Ac-Tub_KAN508-10_4.tif:0002-0187	1.066	399.902	0	1226	202.776	30.191	0.529	426.322	16396	3.687	0.271	0.766
37	ARL13B_KAN508-10_4.tif:0003-0695	1.092	640.31	313	1209	69.81	112.13	0.772	699.26	26893	2.168	0.461	0.894	0.797842				42	Ac-Tub_KAN508-10_4.tif:0003-0695	1.092	1173.95	267	2223	69.81	112.13	0.772	1282.03	49306	2.168	0.461	0.894
38	ARL13B_KAN508-10_4.tif:0004-0717	0.338	339.538	301	392	174.379	115.598	0.403	114.771	4414	4.39	0.228	0.65	0.130951				43	Ac-Tub_KAN508-10_4.tif:0004-0717	0.338	201.154	72	300	174.379	115.598	0.403	67.994	2615	4.39	0.228	0.65
39	ARL13B_KAN508-10_4.tif:0005-1026	1.56	779.367	246	1934	195.061	165.386	0.629	1215.88	46762	2.612	0.383	0.822	1.3873				44	Ac-Tub_KAN508-10_4.tif:0005-1026	1.56	109.667	0	613	195.061	165.386	0.629	171.09	6580	2.612	0.383	0.822
45	ARL13B_KAN508-10_5.tif:0001-0196	1.872	630.375	306	1036	75.425	31.636	0.545	1180.13	45387	3.795	0.263	0.9	1.34651				52	Ac-Tub_KAN508-10_5.tif:0001-0196	1.872	648.528	42	1307	75.425	31.636	0.545	1214.12	46694	3.795	0.263	0.9
46	ARL13B_KAN508-10_5.tif:0002-0289	1.612	962.629	324	2696	192.174	46.541	0.628	1551.85	59683	2.73	0.366	0.795	1.77063				53	Ac-Tub_KAN508-10_5.tif:0002-0289	1.612	623.113	0	2537	192.174	46.541	0.628	1004.52	38633	2.73	0.366	0.795
47	ARL13B_KAN508-10_5.tif:0003-0508	2.106	585.296	308	906	103.167	81.89	0.531	1232.71	47409	3.728	0.268	0.814	1.4065				54	Ac-Tub_KAN508-10_5.tif:0003-0508	2.106	423.728	0	1361	103.167	81.89	0.531	892.426	34322	3.728	0.268	0.814
48	ARL13B_KAN508-10_5.tif:0004-0596	0.468	383.167	305	452	49.746	96.132	0.388	179.333	6897	4.709	0.212	0.667	0.204615				55	Ac-Tub_KAN508-10_5.tif:0004-0596	0.468	330.056	0	830	49.746	96.132	0.388	154.475	5941	4.709	0.212	0.667
49	ARL13B_KAN508-10_5.tif:0005-0733	1.56	834.8	309	1609	119.459	118.169	0.514	1302.37	50088	3.807	0.263	0.784	1.48598				56	Ac-Tub_KAN508-10_5.tif:0005-0733	1.56	470.767	0	2475	119.459	118.169	0.514	734.44	28246	3.807	0.263	0.784
50	ARL13B_KAN508-10_5.tif:0006-0839	0.468	361.944	300	462	10.06	135.128	0.34	169.4	6515	4.629	0.216	0.59	0.193282				57	Ac-Tub_KAN508-10_5.tif:0006-0839	0.468	677.556	355	1159	10.06	135.128	0.34	317.115	12196	4.629	0.216	0.59
51	ARL13B_KAN508-10_5.tif:0007-0870	1.144	538.295	313	759	212.249	140.324	0.539	615.847	23685	3.577	0.28	0.715	0.70267				58	Ac-Tub_KAN508-10_5.tif:0007-0870	1.144	898.273	68	2812	212.249	140.324	0.539	1027.69	39524	3.577	0.28	0.715
59	ARL13B_KAN508-10_6.tif:0001-0028	1.742	839.478	301	1809	202.478	4.644	0.513	1462.46	56245	4.173	0.24	0.761	1.66864				65	Ac-Tub_KAN508-10_6.tif:0001-0028	1.742	121.567	0	900	202.478	4.644	0.513	211.783	8145	4.173	0.24	0.761
60	ARL13B_KAN508-10_6.tif:0002-0078	1.794	566.913	305	1019	75.296	12.567	0.63	1017.1	39117	2.998	0.334	0.784	1.1605				66	Ac-Tub_KAN508-10_6.tif:0002-0078	1.794	405.406	0	1548	75.296	12.567	0.63	727.342	27973	2.998	0.334	0.784
61	ARL13B_KAN508-10_6.tif:0003-0218	2.158	1079.42	216	2795	188.529	35.087	0.51	2329.53	89592	3.959	0.253	0.79	2.65795				67	Ac-Tub_KAN508-10_6.tif:0003-0218	2.158	502.06	0	1960	188.529	35.087	0.51	1083.51	41671	3.959	0.253	0.79
62	ARL13B_KAN508-10_6.tif:0004-0477	1.43	1000.65	300	1999	106.081	76.988	0.585	1431.02	55036	3.06	0.327	0.803	1.63277				68	Ac-Tub_KAN508-10_6.tif:0004-0477	1.43	1125.45	239	2451	106.081	76.988	0.585	1609.5	61900	3.06	0.327	0.803
63	ARL13B_KAN508-10_6.tif:0005-0509	1.118	445	304	698	129.017	82.119	0.277	497.54	19135	8.113	0.123	0.573	0.567684				69	Ac-Tub_KAN508-10_6.tif:0005-0509	1.118	640.419	145	2141	129.017	82.119	0.277	716.031	27538	8.113	0.123	0.573
64	ARL13B_KAN508-10_6.tif:0006-0984	2.054	968.367	156	2051	14.546	158.806	0.584	1989.15	76501	3.218	0.311	0.832	2.26958				70	Ac-Tub_KAN508-10_6.tif:0006-0984	2.054	1182.06	0	3184	14.546	158.806	0.584	2428.1	93383	3.218	0.311	0.832
										37357.7				1.1083
71	ARL13B_KAN508-11_1.tif:0001-0008	1.326	671.451	302	1174	205.975	1.409	0.369	890.398	34244	5.907	0.169	0.708	1.01593				79	Ac-Tub_KAN508-11_1.tif:0001-0008	1.326	285.686	0	1112	205.975	1.409	0.369	378.843	14570	5.907	0.169	0.708
72	ARL13B_KAN508-11_1.tif:0002-0080	1.794	765.275	302	1378	184.588	12.854	0.435	1372.99	52804	4.675	0.214	0.767	1.56655				80	Ac-Tub_KAN508-11_1.tif:0002-0080	1.794	313.362	0	1770	184.588	12.854	0.435	562.206	21622	4.675	0.214	0.767
73	ARL13B_KAN508-11_1.tif:0003-0277	1.638	996.317	321	2111	211.142	44.66	0.755	1632.07	62768	2.194	0.456	0.881	1.86216				81	Ac-Tub_KAN508-11_1.tif:0003-0277	1.638	481.73	146	983	211.142	44.66	0.755	789.122	30349	2.194	0.456	0.881
74	ARL13B_KAN508-11_1.tif:0004-0292	1.612	560.435	302	1162	147.203	47.054	0.632	903.476	34747	3.186	0.314	0.816	1.03085				82	Ac-Tub_KAN508-11_1.tif:0004-0292	1.612	373.935	0	1259	147.203	47.054	0.632	602.82	23184	3.186	0.314	0.816
75	ARL13B_KAN508-11_1.tif:0005-0599	2.132	974.768	321	2096	119.343	96.569	0.579	2078.33	79931	3.649	0.274	0.8	2.37134				83	Ac-Tub_KAN508-11_1.tif:0005-0599	2.132	202.573	0	1705	119.343	96.569	0.579	431.912	16611	3.649	0.274	0.8
76	ARL13B_KAN508-11_1.tif:0006-0620	1.118	884.209	323	1531	71.747	100.149	0.599	988.606	38021	2.769	0.361	0.768	1.12798				84	Ac-Tub_KAN508-11_1.tif:0006-0620	1.118	324.93	0	911	71.747	100.149	0.599	363.294	13972	2.769	0.361	0.768
77	ARL13B_KAN508-11_1.tif:0007-0824	0.468	431.5	302	637	33.504	133.112	0.311	201.954	7767	4.428	0.226	0.554	0.230426				85	Ac-Tub_KAN508-11_1.tif:0007-0824	0.468	342.389	10	803	33.504	133.112	0.311	160.248	6163	4.428	0.226	0.554
78	ARL13B_KAN508-11_1.tif:0008-0944	0.806	600.355	298	1134	176.842	152.353	0.581	483.915	18611	3.361	0.298	0.838	0.552138				86	Ac-Tub_KAN508-11_1.tif:0008-0944	0.806	50.355	0	268	176.842	152.353	0.581	40.588	1561	3.361	0.298	0.838
87	ARL13B_KAN508-11_2.tif:0001-0147	0.806	440.871	305	593	13.74	23.67	0.723	355.363	13667	2.783	0.359	0.816	0.405463				95	Ac-Tub_KAN508-11_2.tif:0001-0147	0.806	605.903	172	1071	13.74	23.67	0.723	488.387	18783	2.783	0.359	0.816
88	ARL13B_KAN508-11_2.tif:0002-0162	1.014	419.436	309	519	141.34	26.236	0.432	425.334	16358	4.977	0.201	0.729	0.485298				96	Ac-Tub_KAN508-11_2.tif:0002-0162	1.014	793.385	137	1392	141.34	26.236	0.432	804.54	30942	4.977	0.201	0.729
89	ARL13B_KAN508-11_2.tif:0003-0233	1.508	737.879	309	1218	29.748	37.499	0.685	1112.79	42797	2.662	0.376	0.841	1.26967				97	Ac-Tub_KAN508-11_2.tif:0003-0233	1.508	1055.4	282	2651	29.748	37.499	0.685	1591.63	61213	2.662	0.376	0.841
90	ARL13B_KAN508-11_2.tif:0004-0288	1.04	654	309	1206	67.153	46.444	0.479	680.201	26160	4.04	0.248	0.721	0.776096				98	Ac-Tub_KAN508-11_2.tif:0004-0288	1.04	959.1	0	2500	67.153	46.444	0.479	997.524	38364	4.04	0.248	0.721
91	ARL13B_KAN508-11_2.tif:0005-0712	0.858	650.818	305	1118	90.469	114.944	0.747	558.436	21477	2.35	0.426	0.825	0.637164				99	Ac-Tub_KAN508-11_2.tif:0005-0712	0.858	1065.82	106	1944	90.469	114.944	0.747	914.527	35172	2.35	0.426	0.825
92	ARL13B_KAN508-11_2.tif:0006-0778	1.482	450.421	301	723	35.423	125.296	0.347	667.564	25674	5.295	0.189	0.704	0.761678				100	Ac-Tub_KAN508-11_2.tif:0006-0778	1.482	776.526	121	1631	35.423	125.296	0.347	1150.88	44262	5.295	0.189	0.704
93	ARL13B_KAN508-11_2.tif:0007-0850	1.664	905.969	300	2142	168.335	137.249	0.694	1507.62	57982	2.334	0.428	0.848	1.72017				101	Ac-Tub_KAN508-11_2.tif:0007-0850	1.664	1261.61	337	2881	168.335	137.249	0.694	2099.44	80743	2.334	0.428	0.848
94	ARL13B_KAN508-11_2.tif:0008-0889	2.288	1079.22	293	2219	206.34	143.399	0.461	2469.39	94971	4.801	0.208	0.834	2.81753				102	Ac-Tub_KAN508-11_2.tif:0008-0889	2.288	1107.53	247	2478	206.34	143.399	0.461	2534.19	97463	4.801	0.208	0.834
103	ARL13B_KAN508-11_3.tif:0001-0596	1.638	1009.3	307	2174	127.727	96.063	0.647	1653.34	63586	2.957	0.338	0.851	1.88642				110	Ac-Tub_KAN508-11_3.tif:0001-0596	1.638	609.365	0	2388	127.727	96.063	0.647	998.2	38390	2.957	0.338	0.851
104	ARL13B_KAN508-11_3.tif:0002-0692	1.456	763.339	310	1428	31.343	111.663	0.508	1111.49	42747	3.692	0.271	0.757	1.26819				111	Ac-Tub_KAN508-11_3.tif:0002-0692	1.456	560.286	10	1672	31.343	111.663	0.508	815.825	31376	3.692	0.271	0.757
105	ARL13B_KAN508-11_3.tif:0003-0702	1.3	537.08	241	1054	214.762	113.21	0.383	698.246	26854	4.503	0.222	0.658	0.796685				112	Ac-Tub_KAN508-11_3.tif:0003-0702	1.3	330.68	0	963	214.762	113.21	0.383	429.91	16534	4.503	0.222	0.658
106	ARL13B_KAN508-11_3.tif:0004-0785	1.014	516.179	313	878	65.962	126.687	0.47	523.438	20131	4.404	0.227	0.729	0.597232				113	Ac-Tub_KAN508-11_3.tif:0004-0785	1.014	1050.69	266	2236	65.962	126.687	0.47	1065.47	40977	4.404	0.227	0.729
107	ARL13B_KAN508-11_3.tif:0005-0902	1.118	522.814	215	819	124.588	145.498	0.791	584.541	22481	2.191	0.456	0.896	0.66695				114	Ac-Tub_KAN508-11_3.tif:0005-0902	1.118	799.744	134	1863	124.588	145.498	0.791	894.168	34389	2.191	0.456	0.896
108	ARL13B_KAN508-11_3.tif:0006-0932	1.144	486.295	303	703	5.739	150.215	0.279	556.356	21397	5.475	0.183	0.55	0.634791				115	Ac-Tub_KAN508-11_3.tif:0006-0932	1.144	415.545	44	1410	5.739	150.215	0.279	475.413	18284	5.475	0.183	0.55
109	ARL13B_KAN508-11_3.tif:0007-1018	0.468	462.333	306	633	180.618	164.251	0.476	216.385	8322	4.3	0.233	0.621	0.246891				116	Ac-Tub_KAN508-11_3.tif:0007-1018	0.468	371.167	0	1211	180.618	164.251	0.476	173.716	6681	4.3	0.233	0.621
117	ARL13B_KAN508-11_4.tif:0001-0220	0.312	347.417	300	385	95.138	35.569	0.781	108.401	4169	2.033	0.492	0.828	0.123683				121	Ac-Tub_KAN508-11_4.tif:0001-0220	0.312	541.5	440	683	95.138	35.569	0.781	168.958	6498	2.033	0.492	0.828
118	ARL13B_KAN508-11_4.tif:0002-0407	0.78	385.567	310	494	63.065	65.591	0.505	300.76	11567	4.273	0.234	0.789	0.343162				122	Ac-Tub_KAN508-11_4.tif:0002-0407	0.78	738.8	176	1336	63.065	65.591	0.505	576.299	22164	4.273	0.234	0.789
119	ARL13B_KAN508-11_4.tif:0003-0575	0.65	452.92	307	756	204.307	92.774	0.793	294.416	11323	2.083	0.48	0.893	0.335923				123	Ac-Tub_KAN508-11_4.tif:0003-0575	0.65	1115.72	747	1411	204.307	92.774	0.793	725.262	27893	2.083	0.48	0.893
120	ARL13B_KAN508-11_4.tif:0004-0731	1.274	742.816	300	1492	183.521	117.938	0.777	946.405	36398	2.127	0.47	0.883	1.07983				124	Ac-Tub_KAN508-11_4.tif:0004-0731	1.274	1171.08	0	2471	183.521	117.938	0.777	1492.05	57383	2.127	0.47	0.883
125	ARL13B_KAN508-11_6.tif:0001-0056	1.404	501.093	307	776	150.366	9.048	0.686	703.576	27059	2.467	0.405	0.8	0.802767				134	Ac-Tub_KAN508-11_6.tif:0001-0056	1.404	651.111	0	1948	150.366	9.048	0.686	914.215	35160	2.467	0.405	0.8
126	ARL13B_KAN508-11_6.tif:0002-0122	1.924	1256.9	309	3031	87.975	19.629	0.736	2418.43	93011	2.395	0.418	0.902	2.75938				135	Ac-Tub_KAN508-11_6.tif:0002-0122	1.924	284.689	0	1998	87.975	19.629	0.736	547.775	21067	2.395	0.418	0.902
127	ARL13B_KAN508-11_6.tif:0003-0256	1.092	785.357	302	1852	189.926	41.23	0.594	857.662	32985	2.891	0.346	0.792	0.978576				136	Ac-Tub_KAN508-11_6.tif:0003-0256	1.092	452.81	0	1539	189.926	41.23	0.594	494.498	19018	2.891	0.346	0.792
128	ARL13B_KAN508-11_6.tif:0004-0268	0.416	476.25	300	737	27.352	43.235	0.772	198.132	7620	2.481	0.403	0.78	0.226065				137	Ac-Tub_KAN508-11_6.tif:0004-0268	0.416	416.562	50	1304	27.352	43.235	0.772	173.3	6665	2.481	0.403	0.78
129	ARL13B_KAN508-11_6.tif:0005-0397	0.754	447.483	300	652	86.26	63.969	0.727	337.422	12977	2.201	0.454	0.795	0.384992				138	Ac-Tub_KAN508-11_6.tif:0005-0397	0.754	686.172	0	2312	86.26	63.969	0.727	517.405	19899	2.201	0.454	0.795
130	ARL13B_KAN508-11_6.tif:0006-0522	1.196	504.478	305	751	216.394	84.232	0.451	603.392	23206	4.503	0.222	0.786	0.688459				139	Ac-Tub_KAN508-11_6.tif:0006-0522	1.196	124.848	0	698	216.394	84.232	0.451	149.327	5743	4.503	0.222	0.786
131	ARL13B_KAN508-11_6.tif:0007-0531	1.3	519.24	311	771	179.529	85.611	0.45	675.053	25962	4.73	0.211	0.719	0.770222				140	Ac-Tub_KAN508-11_6.tif:0007-0531	1.3	686.46	0	2444	179.529	85.611	0.45	892.452	34323	4.73	0.211	0.719
132	ARL13B_KAN508-11_6.tif:0008-0650	1.144	945.364	378	1715	87.749	104.937	0.568	1081.56	41596	3.564	0.281	0.8	1.23404				141	Ac-Tub_KAN508-11_6.tif:0008-0650	1.144	514.5	0	1852	87.749	104.937	0.568	588.623	22638	3.564	0.281	0.8
133	ARL13B_KAN508-11_6.tif:0009-0832	0.52	506.3	347	701	42.941	134.2	0.744	263.292	10126	2.702	0.37	0.8	0.300411				142	Ac-Tub_KAN508-11_6.tif:0009-0832	0.52	171.45	0	449	42.941	134.2	0.744	89.159	3429	2.702	0.37	0.8
										32541.6				0.96542
143	ARL13B_KAN508-12_1.tif:0001-0109	2.028	1128.73	314	2425	139.56	17.56	0.669	2289.2	88041	2.674	0.374	0.839	2.61194				157	Ac-Tub_KAN508-12_1.tif:0001-0109	2.028	1502.85	229	3575	139.56	17.56	0.669	3047.96	117222	2.674	0.374	0.839
144	ARL13B_KAN508-12_1.tif:0002-0232	1.664	519.422	118	1363	208.373	37.518	0.254	864.37	33243	3.608	0.277	0.446	0.98623				158	Ac-Tub_KAN508-12_1.tif:0002-0232	1.664	305.75	0	1866	208.373	37.518	0.254	508.799	19568	3.608	0.277	0.446
145	ARL13B_KAN508-12_1.tif:0003-0256	0.442	420.176	308	615	22.551	41.474	0.47	185.729	7143	3.979	0.251	0.723	0.211913				159	Ac-Tub_KAN508-12_1.tif:0003-0256	0.442	395.941	62	934	22.551	41.474	0.47	175.017	6731	3.979	0.251	0.723
146	ARL13B_KAN508-12_1.tif:0004-0444	0.442	396.824	254	608	41.522	71.647	0.649	175.407	6746	1.578	0.634	0.68	0.200136				160	Ac-Tub_KAN508-12_1.tif:0004-0444	0.442	806.118	143	1818	41.522	71.647	0.649	356.325	13704	1.578	0.634	0.68
147	ARL13B_KAN508-12_1.tif:0005-0478	1.976	701.263	300	1438	188.996	77.175	0.346	1385.78	53296	6.221	0.161	0.707	1.58115				161	Ac-Tub_KAN508-12_1.tif:0005-0478	1.976	221.724	0	1332	188.996	77.175	0.346	438.152	16851	6.221	0.161	0.707
148	ARL13B_KAN508-12_1.tif:0006-0488	1.118	660.698	308	1199	99.714	78.834	0.585	738.704	28410	3.245	0.308	0.768	0.842848				162	Ac-Tub_KAN508-12_1.tif:0006-0488	1.118	414.442	0	1669	99.714	78.834	0.585	463.374	17821	3.245	0.308	0.768
149	ARL13B_KAN508-12_1.tif:0007-0524	1.04	439.875	304	705	179.302	84.358	0.256	457.498	17595	8.472	0.118	0.64	0.521996				163	Ac-Tub_KAN508-12_1.tif:0007-0524	1.04	41.325	0	365	179.302	84.358	0.256	42.981	1653	8.472	0.118	0.64
150	ARL13B_KAN508-12_1.tif:0008-0634	1.014	444.949	214	603	11.534	102.259	0.527	451.205	17353	4.452	0.225	0.963	0.514816				164	Ac-Tub_KAN508-12_1.tif:0008-0634	1.014	497.077	137	1331	11.534	102.259	0.527	504.066	19386	4.452	0.225	0.963
151	ARL13B_KAN508-12_1.tif:0009-0794	1.248	646.188	306	1230	190.178	127.942	0.441	806.491	31017	4.301	0.232	0.793	0.92019				165	Ac-Tub_KAN508-12_1.tif:0009-0794	1.248	180.042	0	1257	190.178	127.942	0.441	224.706	8642	4.301	0.232	0.793
152	ARL13B_KAN508-12_1.tif:0010-0790	0.988	433.053	303	623	136.931	127.472	0.418	427.882	16456	4.823	0.207	0.691	0.488205				166	Ac-Tub_KAN508-12_1.tif:0010-0790	0.988	1112.63	124	2226	136.931	127.472	0.418	1099.35	42280	4.823	0.207	0.691
153	ARL13B_KAN508-12_1.tif:0011-0817	1.092	550.548	314	820	58.672	131.929	0.486	601.234	23123	3.784	0.264	0.724	0.685997				167	Ac-Tub_KAN508-12_1.tif:0011-0817	1.092	247.833	0	921	58.672	131.929	0.486	270.65	10409	3.784	0.264	0.724
154	ARL13B_KAN508-12_1.tif:0012-0860	1.092	546.738	304	844	217.772	138.683	0.371	597.074	22963	5.288	0.189	0.667	0.68125				168	Ac-Tub_KAN508-12_1.tif:0012-0860	1.092	281.667	0	921	217.772	138.683	0.371	307.599	11830	5.288	0.189	0.667
155	ARL13B_KAN508-12_1.tif:0013-0997	1.742	521.836	297	765	93.283	160.77	0.608	909.093	34963	3.171	0.315	0.832	1.03726				169	Ac-Tub_KAN508-12_1.tif:0013-0997	1.742	438.299	0	1527	93.283	160.77	0.608	763.562	29366	3.171	0.315	0.832
156	ARL13B_KAN508-12_1.tif:0014-1034	1.014	495.974	265	1002	138.28	166.871	0.435	502.948	19343	4.38	0.228	0.765	0.573854				170	Ac-Tub_KAN508-12_1.tif:0014-1034	1.014	408.692	82	1034	138.28	166.871	0.435	414.439	15939	4.38	0.228	0.765
171	ARL13B_KAN508-12_2.tif:0001-0013	1.3	573.86	314	1019	47.114	2.012	0.621	746.063	28693	2.082	0.48	0.775	0.851244				186	Ac-Tub_KAN508-12_2.tif:0001-0013	1.3	811.26	0	2022	47.114	2.012	0.621	1054.7	40563	2.082	0.48	0.775
172	ARL13B_KAN508-12_2.tif:0002-0169	1.898	706.507	304	1438	179.786	27.308	0.543	1341.03	51575	3.834	0.261	0.789	1.53009				187	Ac-Tub_KAN508-12_2.tif:0002-0169	1.898	1276.37	350	3080	179.786	27.308	0.543	2422.7	93175	3.834	0.261	0.789
173	ARL13B_KAN508-12_2.tif:0003-0170	1.95	827.92	305	1438	142.486	27.433	0.486	1614.54	62094	4.189	0.239	0.806	1.84216				188	Ac-Tub_KAN508-12_2.tif:0003-0170	1.95	1078.8	0	2945	142.486	27.433	0.486	2103.79	80910	4.189	0.239	0.806
174	ARL13B_KAN508-12_2.tif:0004-0245	1.482	624.842	301	1047	212.444	39.513	0.52	926.072	35616	4.257	0.235	0.814	1.05663				189	Ac-Tub_KAN508-12_2.tif:0004-0245	1.482	228.053	0	1464	212.444	39.513	0.52	337.994	12999	4.257	0.235	0.814
175	ARL13B_KAN508-12_2.tif:0005-0307	0.962	371.081	301	460	35.573	49.497	0.515	357.001	13730	3.981	0.251	0.787	0.407332				190	Ac-Tub_KAN508-12_2.tif:0005-0307	0.962	580.459	96	1190	35.573	49.497	0.515	558.436	21477	3.981	0.251	0.787
176	ARL13B_KAN508-12_2.tif:0006-0373	1.56	1118.93	133	2349	121.897	60.133	0.774	1745.64	67136	1.84	0.544	0.851	1.99174				191	Ac-Tub_KAN508-12_2.tif:0006-0373	1.56	1394.82	0	3389	121.897	60.133	0.774	2176.05	83689	1.84	0.544	0.851
177	ARL13B_KAN508-12_2.tif:0007-0426	1.066	782.61	302	1434	75.392	68.801	0.59	834.312	32087	3.391	0.295	0.82	0.951934				192	Ac-Tub_KAN508-12_2.tif:0007-0426	1.066	923.268	78	2099	75.392	68.801	0.59	984.263	37854	3.391	0.295	0.82
178	ARL13B_KAN508-12_2.tif:0008-0444	1.222	517.553	229	912	18.497	71.772	0.446	632.488	24325	2.958	0.338	0.639	0.721657				193	Ac-Tub_KAN508-12_2.tif:0008-0444	1.222	674.723	33	1865	18.497	71.772	0.446	824.562	31712	2.958	0.338	0.639
179	ARL13B_KAN508-12_2.tif:0009-0573	1.274	453.102	271	826	63.113	92.526	0.497	577.287	22202	3.185	0.314	0.671	0.658673				194	Ac-Tub_KAN508-12_2.tif:0009-0573	1.274	439.367	0	943	63.113	92.526	0.497	559.788	21529	3.185	0.314	0.671
180	ARL13B_KAN508-12_2.tif:0010-0613	0.832	546.219	237	878	1.718	98.861	0.599	454.481	17479	3.458	0.289	0.842	0.518555				195	Ac-Tub_KAN508-12_2.tif:0010-0613	0.832	697.75	84	1425	1.718	98.861	0.599	580.563	22328	3.458	0.289	0.842
181	ARL13B_KAN508-12_2.tif:0011-0679	0.91	669.857	312	1166	215.566	109.556	0.644	609.607	23445	3.021	0.331	0.843	0.69555				196	Ac-Tub_KAN508-12_2.tif:0011-0679	0.91	68.429	0	607	215.566	109.556	0.644	62.274	2395	3.021	0.331	0.843
182	ARL13B_KAN508-12_2.tif:0012-0743	1.118	537.674	300	892	123.144	119.976	0.311	601.156	23120	6.579	0.152	0.656	0.685908				197	Ac-Tub_KAN508-12_2.tif:0012-0743	1.118	674	60	2750	123.144	119.976	0.311	753.577	28982	6.579	0.152	0.656
183	ARL13B_KAN508-12_2.tif:0013-0825	1.456	438.429	289	769	45.985	133.1	0.499	638.39	24552	3.966	0.252	0.818	0.728391				198	Ac-Tub_KAN508-12_2.tif:0013-0825	1.456	414.857	0	1487	45.985	133.1	0.499	604.068	23232	3.966	0.252	0.818
184	ARL13B_KAN508-12_2.tif:0014-0883	1.612	594.468	308	1342	63.566	142.386	0.589	958.34	36857	3.183	0.314	0.795	1.09345				199	Ac-Tub_KAN508-12_2.tif:0014-0883	1.612	459.5	20	1085	63.566	142.386	0.589	740.759	28489	3.183	0.314	0.795
185	ARL13B_KAN508-12_2.tif:0015-0999	1.742	682.075	300	1241	68.494	161.085	0.548	1188.25	45699	3.48	0.287	0.784	1.35577				200	Ac-Tub_KAN508-12_2.tif:0015-0999	1.742	701.955	116	1926	68.494	161.085	0.548	1222.88	47031	3.48	0.287	0.784
201	ARL13B_KAN508-12_3.tif:0001-0057	0.65	478.28	306	705	4.892	9.175	0.451	310.901	11957	4.676	0.214	0.685	0.354732				211	Ac-Tub_KAN508-12_3.tif:0001-0057	0.65	187.36	0	483	4.892	9.175	0.451	121.791	4684	4.676	0.214	0.685
202	ARL13B_KAN508-12_3.tif:0002-0090	1.742	553.119	300	946	83.935	14.454	0.381	963.592	37059	5.254	0.19	0.65	1.09944				212	Ac-Tub_KAN508-12_3.tif:0002-0090	1.742	752.761	27	1574	83.935	14.454	0.381	1311.39	50435	5.254	0.19	0.65
203	ARL13B_KAN508-12_3.tif:0003-0372	1.846	580.901	274	1102	178.496	60.143	0.653	1072.41	41244	2.775	0.36	0.861	1.2236				213	Ac-Tub_KAN508-12_3.tif:0003-0372	1.846	323.352	0	1365	178.496	60.143	0.653	596.944	22958	2.775	0.36	0.861
204	ARL13B_KAN508-12_3.tif:0004-0473	1.976	803.632	311	1583	211.125	76.352	0.775	1588.07	61076	2.284	0.438	0.859	1.81196				214	Ac-Tub_KAN508-12_3.tif:0004-0473	1.976	244.776	0	1307	211.125	76.352	0.775	483.707	18603	2.284	0.438	0.859
205	ARL13B_KAN508-12_3.tif:0005-0550	1.456	984.696	311	1796	215.848	88.644	0.629	1433.8	55143	2.132	0.469	0.718	1.63594				215	Ac-Tub_KAN508-12_3.tif:0005-0550	1.456	447.018	0	1777	215.848	88.644	0.629	650.897	25033	2.132	0.469	0.718
206	ARL13B_KAN508-12_3.tif:0006-0700	1.196	961.326	321	1957	59.347	112.942	0.761	1149.82	44221	2.673	0.374	0.885	1.31192				216	Ac-Tub_KAN508-12_3.tif:0006-0700	1.196	947.5	17	2478	59.347	112.942	0.761	1133.28	43585	2.673	0.374	0.885
207	ARL13B_KAN508-12_3.tif:0007-0704	1.43	884.909	327	1670	107.461	113.753	0.694	1265.5	48670	1.715	0.583	0.809	1.44391				217	Ac-Tub_KAN508-12_3.tif:0007-0704	1.43	842.091	0	1798	107.461	113.753	0.694	1204.26	46315	1.715	0.583	0.809
208	ARL13B_KAN508-12_3.tif:0008-0793	2.028	741.179	300	1367	171.551	127.892	0.721	1503.2	57812	2.323	0.431	0.83	1.71513				218	Ac-Tub_KAN508-12_3.tif:0008-0793	2.028	476.513	0	1559	171.551	127.892	0.721	966.426	37168	2.323	0.431	0.83
209	ARL13B_KAN508-12_3.tif:0009-0903	1.196	541.065	125	961	18.274	145.626	0.449	647.153	24889	4.995	0.2	0.844	0.738389				219	Ac-Tub_KAN508-12_3.tif:0009-0903	1.196	596.978	130	1384	18.274	145.626	0.449	714.029	27461	4.995	0.2	0.844
210	ARL13B_KAN508-12_3.tif:0010-0928	1.274	785.98	303	1585	207.971	149.615	0.656	1001.4	38513	2.603	0.384	0.797	1.14258				220	Ac-Tub_KAN508-12_3.tif:0010-0928	1.274	382.02	0	1792	207.971	149.615	0.656	486.723	18719	2.603	0.384	0.797
221	ARL13B_KAN508-12_4.tif:0001-0249	0.572	418.545	302	576	5.065	40.188	0.524	239.422	9208	3.421	0.292	0.667	0.273176				230	Ac-Tub_KAN508-12_4.tif:0001-0249	0.572	858.682	234	1911	5.065	40.188	0.524	491.196	18891	3.421	0.292	0.667
222	ARL13B_KAN508-12_4.tif:0002-0272	1.092	654.548	126	1305	151.871	44.002	0.726	714.809	27491	1.833	0.545	0.785	0.815583				231	Ac-Tub_KAN508-12_4.tif:0002-0272	1.092	425.5	0	1434	151.871	44.002	0.726	464.674	17871	1.833	0.545	0.785
223	ARL13B_KAN508-12_4.tif:0003-0445	0.936	831.611	341	1677	94.04	71.774	0.776	778.435	29938	1.877	0.533	0.828	0.888179				232	Ac-Tub_KAN508-12_4.tif:0003-0445	0.936	851.361	0	2582	94.04	71.774	0.776	796.922	30649	1.877	0.533	0.828
224	ARL13B_KAN508-12_4.tif:0004-0486	1.43	533.055	308	913	1.734	78.53	0.547	762.314	29318	3.565	0.281	0.833	0.869786				233	Ac-Tub_KAN508-12_4.tif:0004-0486	1.43	527.036	99	1322	1.734	78.53	0.547	753.707	28987	3.565	0.281	0.833
225	ARL13B_KAN508-12_4.tif:0005-0556	1.456	993.589	275	2795	157.443	89.572	0.745	1446.75	55641	2.327	0.43	0.911	1.65072				234	Ac-Tub_KAN508-12_4.tif:0005-0556	1.456	649.786	0	2217	157.443	89.572	0.745	946.145	36388	2.327	0.43	0.911
226	ARL13B_KAN508-12_4.tif:0006-0631	1.3	866.78	300	2236	164.917	101.765	0.55	1126.88	43339	3.302	0.303	0.752	1.28575				235	Ac-Tub_KAN508-12_4.tif:0006-0631	1.3	999.24	0	2665	164.917	101.765	0.55	1299.09	49962	3.302	0.303	0.752
227	ARL13B_KAN508-12_4.tif:0007-0658	1.066	699.585	303	1258	20.87	106.179	0.529	745.803	28683	4.144	0.241	0.781	0.850947				236	Ac-Tub_KAN508-12_4.tif:0007-0658	1.066	491.268	22	1660	20.87	106.179	0.529	523.724	20142	4.144	0.241	0.781
228	ARL13B_KAN508-12_4.tif:0008-0858	1.118	618.767	323	1034	86.357	138.373	0.633	691.824	26607	2.985	0.335	0.768	0.789358				237	Ac-Tub_KAN508-12_4.tif:0008-0858	1.118	827.047	141	1625	86.357	138.373	0.633	924.694	35563	2.985	0.335	0.768
229	ARL13B_KAN508-12_4.tif:0009-0987	1.352	660.558	327	1068	148.8	159.185	0.503	893.128	34349	4.093	0.244	0.754	1.01904				238	Ac-Tub_KAN508-12_4.tif:0009-0987	1.352	946.231	0	2629	148.8	159.185	0.503	1279.38	49204	4.093	0.244	0.754
239	ARL13B_KAN508-12_5.tif:0001-0076	1.742	817.194	309	1819	74.629	12.131	0.379	1423.64	54752	5.131	0.195	0.717	1.62434				249	Ac-Tub_KAN508-12_5.tif:0001-0076	1.742	1260.02	87	3065	74.629	12.131	0.379	2195.08	84421	5.131	0.195	0.717
240	ARL13B_KAN508-12_5.tif:0002-0264	1.066	732.073	149	1523	54.327	42.592	0.691	780.437	30015	2.786	0.359	0.932	0.890464				250	Ac-Tub_KAN508-12_5.tif:0002-0264	1.066	1258.22	208	3014	54.327	42.592	0.691	1341.34	51587	2.786	0.359	0.932
241	ARL13B_KAN508-12_5.tif:0003-0338	1.17	431.133	302	643	82.519	54.623	0.478	504.456	19401	3.998	0.25	0.756	0.575575				251	Ac-Tub_KAN508-12_5.tif:0003-0338	1.17	873.956	47	2034	82.519	54.623	0.478	1022.59	39328	3.998	0.25	0.756
242	ARL13B_KAN508-12_5.tif:0004-0453	1.456	1145.45	326	3084	181.323	73.023	0.56	1667.87	64145	3.621	0.276	0.772	1.90301				252	Ac-Tub_KAN508-12_5.tif:0004-0453	1.456	740.839	0	2640	181.323	73.023	0.56	1078.73	41487	3.621	0.276	0.772
243	ARL13B_KAN508-12_5.tif:0005-0508	0.728	365.036	267	485	213.558	81.834	0.493	265.762	10221	3.013	0.332	0.718	0.303229				253	Ac-Tub_KAN508-12_5.tif:0005-0508	0.728	1270.54	524	2259	213.558	81.834	0.493	925.006	35575	3.013	0.332	0.718
244	ARL13B_KAN508-12_5.tif:0006-0520	1.508	862.569	323	1730	101.293	83.883	0.52	1300.83	50029	3.679	0.272	0.748	1.48422				254	Ac-Tub_KAN508-12_5.tif:0006-0520	1.508	1142.67	18	3609	101.293	83.883	0.52	1723.25	66275	3.679	0.272	0.748
245	ARL13B_KAN508-12_5.tif:0007-0709	0.858	533.485	304	771	13.298	114.338	0.623	457.758	17605	3.321	0.301	0.776	0.522293				255	Ac-Tub_KAN508-12_5.tif:0007-0709	0.858	724	74	1395	13.298	114.338	0.623	621.229	23892	3.321	0.301	0.776
246	ARL13B_KAN508-12_5.tif:0008-0770	0.962	500.973	292	878	147.145	124.108	0.782	481.965	18536	1.957	0.511	0.831	0.549913				256	Ac-Tub_KAN508-12_5.tif:0008-0770	0.962	764.568	124	1535	147.145	124.108	0.782	735.558	28289	1.957	0.511	0.831
247	ARL13B_KAN508-12_5.tif:0009-0811	1.118	427.256	306	639	221.893	130.791	0.408	477.701	18372	5.098	0.196	0.723	0.545047				257	Ac-Tub_KAN508-12_5.tif:0009-0811	1.118	874.86	43	1593	221.893	130.791	0.408	978.153	37619	5.098	0.196	0.723
248	ARL13B_KAN508-12_5.tif:0010-0914	1.3	800.82	313	1936	4.538	147.563	0.659	1041.13	40041	2.824	0.354	0.813	1.18791				258	Ac-Tub_KAN508-12_5.tif:0010-0914	1.3	1157.84	13	2389	4.538	147.563	0.659	1505.28	57892	2.824	0.354	0.813
259	ARL13B_KAN508-12_6.tif:0001-0039	1.222	335.17	0	653	174.22	6.105	0.373	409.603	15753	1.53	0.654	0.56	0.467349				265	Ac-Tub_KAN508-12_6.tif:0001-0039	1.222	461.149	2	1198	174.22	6.105	0.373	563.558	21674	1.53	0.654	0.56
260	ARL13B_KAN508-12_6.tif:0002-0076	0.494	418.158	300	564	32.568	12.293	0.64	206.582	7945	2.405	0.416	0.776	0.235707				266	Ac-Tub_KAN508-12_6.tif:0002-0076	0.494	339.158	123	465	32.568	12.293	0.64	167.554	6444	2.405	0.416	0.776
261	ARL13B_KAN508-12_6.tif:0003-0313	1.144	368.932	277	464	130.407	50.442	0.698	422.083	16233	2.418	0.414	0.88	0.481589				267	Ac-Tub_KAN508-12_6.tif:0003-0313	1.144	538.568	111	1183	130.407	50.442	0.698	616.159	23697	2.418	0.414	0.88
262	ARL13B_KAN508-12_6.tif:0004-0361	0.936	501.306	322	778	164.686	58.144	0.518	469.25	18047	3.674	0.272	0.791	0.535406				268	Ac-Tub_KAN508-12_6.tif:0004-0361	0.936	569.444	164	1105	164.686	58.144	0.518	533.032	20500	3.674	0.272	0.791
263	ARL13B_KAN508-12_6.tif:0005-0661	0.806	383.097	259	522	152.243	106.615	0.377	308.795	11876	5.613	0.178	0.681	0.352329				269	Ac-Tub_KAN508-12_6.tif:0005-0661	0.806	1286.13	417	1809	152.243	106.615	0.377	1036.68	39870	5.613	0.178	0.681
264	ARL13B_KAN508-12_6.tif:0006-0849	1.118	562.93	301	847	112.157	136.914	0.483	629.394	24206	3.601	0.278	0.688	0.718126				270	Ac-Tub_KAN508-12_6.tif:0006-0849	1.118	765.605	1	1685	112.157	136.914	0.483	855.998	32921	3.601	0.278	0.688
										31728.7				0.941305
										33707.2				1
271	ARL13B_KAN508-13_1.tif:0001-0072	1.768	457.147	296	704	197.318	11.634	0.501	808.285	31086	4.043	0.247	0.877	0.69198				280	Ac-Tub_KAN508-13_1.tif:0001-0072	1.768	314.176	0	917	197.318	11.634	0.501	555.497	21364	4.043	0.247	0.877
272	ARL13B_KAN508-13_1.tif:0002-0079	0.364	453.643	300	730	40.336	12.865	0.587	165.136	6351	3.215	0.311	0.757	0.141374				281	Ac-Tub_KAN508-13_1.tif:0002-0079	0.364	11.286	0	22	40.336	12.865	0.587	4.108	158	3.215	0.311	0.757
273	ARL13B_KAN508-13_1.tif:0003-0213	0.832	620.188	275	1249	20.015	34.477	0.74	516.027	19846	2.03	0.493	0.853	0.441776				282	Ac-Tub_KAN508-13_1.tif:0003-0213	0.832	208.594	0	1071	20.015	34.477	0.74	173.56	6675	2.03	0.493	0.853
274	ARL13B_KAN508-13_1.tif:0004-0372	1.352	799.731	287	1883	47.088	60.066	0.708	1081.3	41586	2.116	0.473	0.846	0.925712				283	Ac-Tub_KAN508-13_1.tif:0004-0372	1.352	764.731	6	2340	47.088	60.066	0.708	1033.98	39766	2.116	0.473	0.846
275	ARL13B_KAN508-13_1.tif:0005-0594	1.222	480.213	50	1219	55.626	95.918	0.746	586.855	22570	2.478	0.403	0.904	0.502413				284	Ac-Tub_KAN508-13_1.tif:0005-0594	1.222	614.298	68	1357	55.626	95.918	0.746	750.717	28872	2.478	0.403	0.904
276	ARL13B_KAN508-13_1.tif:0006-0658	2.548	847.602	302	1774	158.05	106.213	0.469	2159.82	83065	4.715	0.212	0.781	1.84904				285	Ac-Tub_KAN508-13_1.tif:0006-0658	2.548	495.765	0	1326	158.05	106.213	0.469	1263.29	48585	4.715	0.212	0.781
277	ARL13B_KAN508-13_1.tif:0007-0802	0.65	355.56	304	440	77.287	129.442	0.774	231.128	8889	1.358	0.737	0.769	0.197871				286	Ac-Tub_KAN508-13_1.tif:0007-0802	0.65	386.64	24	879	77.287	129.442	0.774	251.331	9666	1.358	0.737	0.769
278	ARL13B_KAN508-13_1.tif:0008-0866	1.898	667.849	103	1212	105.781	139.398	0.395	1267.65	48753	3.448	0.29	0.608	1.08525				287	Ac-Tub_KAN508-13_1.tif:0008-0866	1.898	461.342	0	1208	105.781	139.398	0.395	875.681	33678	3.448	0.29	0.608
279	ARL13B_KAN508-13_1.tif:0009-0995	0.936	680.194	302	1245	178.159	160.524	0.518	636.7	24487	3.744	0.267	0.809	0.545085				288	Ac-Tub_KAN508-13_1.tif:0009-0995	0.936	11.917	0	140	178.159	160.524	0.518	11.155	429	3.744	0.267	0.809
289	ARL13B_KAN508-13_2.tif:0001-0055	3.432	541.227	300	1039	183.412	8.929	0.327	1857.6	71442	6.839	0.146	0.802	1.59031				308	Ac-Tub_KAN508-13_2.tif:0001-0055	3.432	674.788	5	2009	183.412	8.929	0.327	2316.01	89072	6.839	0.146	0.802
290	ARL13B_KAN508-13_2.tif:0002-0066	1.768	568.794	153	1240	158.2	10.597	0.546	1005.69	38678	3.531	0.283	0.829	0.86098				309	Ac-Tub_KAN508-13_2.tif:0002-0066	1.768	238.235	0	934	158.2	10.597	0.546	421.225	16200	3.531	0.283	0.829
291	ARL13B_KAN508-13_2.tif:0003-0198	1.43	403.6	267	668	218.797	31.8	0.338	577.183	22198	4.071	0.246	0.621	0.494132				310	Ac-Tub_KAN508-13_2.tif:0003-0198	1.43	397.218	0	1624	218.797	31.8	0.338	568.056	21847	4.071	0.246	0.621
292	ARL13B_KAN508-13_2.tif:0004-0224	2.444	987.394	279	2643	108.767	36.256	0.572	2413.34	92815	2.842	0.352	0.774	2.06608				311	Ac-Tub_KAN508-13_2.tif:0004-0224	2.444	379.681	0	1930	108.767	36.256	0.572	927.996	35690	2.842	0.352	0.774
293	ARL13B_KAN508-13_2.tif:0005-0258	2.002	684.857	302	1498	132.387	41.566	0.526	1371.17	52734	3.504	0.285	0.74	1.17387				312	Ac-Tub_KAN508-13_2.tif:0005-0258	2.002	472.481	0	1226	132.387	41.566	0.526	945.963	36381	3.504	0.285	0.74
294	ARL13B_KAN508-13_2.tif:0006-0260	1.872	1548.82	329	3776	98.309	41.869	0.781	2899.57	111515	2.055	0.487	0.873	2.48235				313	Ac-Tub_KAN508-13_2.tif:0006-0260	1.872	576.222	0	3318	98.309	41.869	0.781	1078.75	41488	2.055	0.487	0.873
295	ARL13B_KAN508-13_2.tif:0007-0336	1.638	1615.35	325	3783	163.038	54.23	0.707	2646.1	101767	2.638	0.379	0.857	2.26535				314	Ac-Tub_KAN508-13_2.tif:0007-0336	1.638	192.048	0	1200	163.038	54.23	0.707	314.593	12099	2.638	0.379	0.857
296	ARL13B_KAN508-13_2.tif:0008-0378	1.742	873.776	300	1756	114.623	61.007	0.525	1522.21	58543	3.756	0.266	0.802	1.30318				315	Ac-Tub_KAN508-13_2.tif:0008-0378	1.742	528.313	0	2591	114.623	61.007	0.525	920.377	35397	3.756	0.266	0.802
297	ARL13B_KAN508-13_2.tif:0009-0415	1.95	667.093	292	1375	179.606	66.879	0.668	1300.91	50032	2.499	0.4	0.862	1.11372				316	Ac-Tub_KAN508-13_2.tif:0009-0415	1.95	669.96	13	2551	179.606	66.879	0.668	1306.5	50247	2.499	0.4	0.862
298	ARL13B_KAN508-13_2.tif:0010-0459	1.222	613.064	301	1401	73.398	74.139	0.403	749.209	28814	4.576	0.219	0.657	0.641405				317	Ac-Tub_KAN508-13_2.tif:0010-0459	1.222	119.511	0	1183	73.398	74.139	0.403	146.051	5617	4.576	0.219	0.657
299	ARL13B_KAN508-13_2.tif:0011-0476	1.404	840.111	306	1839	50.217	76.725	0.637	1179.59	45366	2.522	0.397	0.812	1.00986				318	Ac-Tub_KAN508-13_2.tif:0011-0476	1.404	497.241	0	1155	50.217	76.725	0.637	698.168	26851	2.522	0.397	0.812
300	ARL13B_KAN508-13_2.tif:0012-0519	1.404	638.333	294	1310	69.651	83.751	0.348	896.274	34470	6.223	0.161	0.771	0.767309				319	Ac-Tub_KAN508-13_2.tif:0012-0519	1.404	167.704	0	815	69.651	83.751	0.348	235.47	9056	6.223	0.161	0.771
301	ARL13B_KAN508-13_2.tif:0013-0580	1.482	786.509	316	1702	98.896	93.543	0.683	1165.68	44831	2.393	0.418	0.809	0.997947				320	Ac-Tub_KAN508-13_2.tif:0013-0580	1.482	545.456	0	2637	98.896	93.543	0.683	808.415	31091	2.393	0.418	0.809
302	ARL13B_KAN508-13_2.tif:0014-0610	1.976	875.276	160	2459	36.757	98.314	0.603	1729.65	66521	2.727	0.367	0.817	1.48077				321	Ac-Tub_KAN508-13_2.tif:0014-0610	1.976	727.697	0	2675	36.757	98.314	0.603	1438.02	55305	2.727	0.367	0.817
303	ARL13B_KAN508-13_2.tif:0015-0670	0.39	426.333	312	580	74.879	108.15	0.588	166.28	6395	2.875	0.348	0.769	0.142354				322	Ac-Tub_KAN508-13_2.tif:0015-0670	0.39	261.867	91	663	74.879	108.15	0.588	102.134	3928	2.875	0.348	0.769
304	ARL13B_KAN508-13_2.tif:0016-0779	1.066	416.171	300	624	98.998	125.541	0.391	443.665	17063	5.48	0.182	0.695	0.379826				323	Ac-Tub_KAN508-13_2.tif:0016-0779	1.066	341.146	0	982	98.998	125.541	0.391	363.684	13987	5.48	0.182	0.695
305	ARL13B_KAN508-13_2.tif:0017-0824	1.456	623.089	127	1393	26.269	133.023	0.419	907.273	34893	5.013	0.199	0.718	0.776725				324	Ac-Tub_KAN508-13_2.tif:0017-0824	1.456	441.107	0	1504	26.269	133.023	0.419	642.291	24702	5.013	0.199	0.718
306	ARL13B_KAN508-13_2.tif:0018-0912	0.806	475.677	306	726	46.755	147.193	0.5	383.419	14746	3.915	0.255	0.785	0.328249				325	Ac-Tub_KAN508-13_2.tif:0018-0912	0.806	399.645	66	1237	46.755	147.193	0.5	322.133	12389	3.915	0.255	0.785
307	ARL13B_KAN508-13_2.tif:0019-1002	1.066	545.683	302	890	164.725	161.523	0.655	581.733	22373	2.82	0.355	0.774	0.498027				326	Ac-Tub_KAN508-13_2.tif:0019-1002	1.066	270.659	0	1211	164.725	161.523	0.655	288.539	11097	2.82	0.355	0.774
327	ARL13B_KAN508-13_3.tif:0001-0036	0.962	434.649	316	634	26.957	5.851	0.512	418.157	16082	3.58	0.279	0.763	0.357988				341	Ac-Tub_KAN508-13_3.tif:0001-0036	0.962	186.486	0	672	26.957	5.851	0.512	179.411	6900	3.58	0.279	0.763
328	ARL13B_KAN508-13_3.tif:0002-0058	1.586	1269.46	330	3109	132.863	9.37	0.72	2013.48	77437	2.238	0.447	0.841	1.72376				342	Ac-Tub_KAN508-13_3.tif:0002-0058	1.586	634.426	0	2938	132.863	9.37	0.72	1006.26	38700	2.238	0.447	0.841
329	ARL13B_KAN508-13_3.tif:0003-0076	1.69	520.308	299	782	149.011	12.336	0.554	879.373	33820	3.553	0.281	0.818	0.75284				343	Ac-Tub_KAN508-13_3.tif:0003-0076	1.69	692.8	24	1607	149.011	12.336	0.554	1170.9	45032	3.553	0.281	0.818
330	ARL13B_KAN508-13_3.tif:0004-0091	1.222	1066.26	314	2876	96.57	14.754	0.778	1303.04	50114	2.169	0.461	0.879	1.11555				344	Ac-Tub_KAN508-13_3.tif:0004-0091	1.222	326.745	0	1634	96.57	14.754	0.778	399.306	15357	2.169	0.461	0.879
331	ARL13B_KAN508-13_3.tif:0005-0150	1.456	879.821	315	1674	81.42	24.182	0.56	1281.1	49270	3.162	0.316	0.742	1.09676				345	Ac-Tub_KAN508-13_3.tif:0005-0150	1.456	616.679	0	1817	81.42	24.182	0.56	897.938	34534	3.162	0.316	0.742
332	ARL13B_KAN508-13_3.tif:0006-0170	0.988	602.263	327	1126	66.04	27.442	0.404	595.072	22886	5.45	0.183	0.71	0.509447				346	Ac-Tub_KAN508-13_3.tif:0006-0170	0.988	349.553	0	879	66.04	27.442	0.404	345.379	13283	5.45	0.183	0.71
333	ARL13B_KAN508-13_3.tif:0007-0187	1.586	845.131	322	1659	105.876	30.092	0.459	1340.46	51553	4.441	0.225	0.748	1.14758				347	Ac-Tub_KAN508-13_3.tif:0007-0187	1.586	193.475	0	895	105.876	30.092	0.459	306.87	11802	4.441	0.225	0.748
334	ARL13B_KAN508-13_3.tif:0008-0224	1.95	1193.52	304	3456	163.263	36.104	0.621	2327.5	89514	2.515	0.398	0.794	1.9926				348	Ac-Tub_KAN508-13_3.tif:0008-0224	1.95	324.453	0	2413	163.263	36.104	0.621	632.722	24334	2.515	0.398	0.794
335	ARL13B_KAN508-13_3.tif:0009-0354	1.898	812.753	307	1801	97.515	57.254	0.582	1542.7	59331	3.42	0.292	0.825	1.32072				349	Ac-Tub_KAN508-13_3.tif:0009-0354	1.898	636.808	0	2584	97.515	57.254	0.582	1208.73	46487	3.42	0.292	0.825
336	ARL13B_KAN508-13_3.tif:0010-0366	2.106	962.235	272	2120	220.951	59.044	0.525	2026.59	77941	3.692	0.271	0.775	1.73498				350	Ac-Tub_KAN508-13_3.tif:0010-0366	2.106	360.654	0	1804	220.951	59.044	0.525	759.584	29213	3.692	0.271	0.775
337	ARL13B_KAN508-13_3.tif:0011-0553	2.34	578.311	303	927	162.343	89.11	0.49	1353.33	52048	4.327	0.231	0.811	1.1586				351	Ac-Tub_KAN508-13_3.tif:0011-0553	2.34	396.322	0	1778	162.343	89.11	0.49	927.45	35669	4.327	0.231	0.811
338	ARL13B_KAN508-13_3.tif:0012-0651	1.092	1015.79	303	2315	104.736	105.043	0.758	1109.31	42663	2.21	0.452	0.832	0.949687				352	Ac-Tub_KAN508-13_3.tif:0012-0651	1.092	486.643	0	1900	104.736	105.043	0.758	531.446	20439	2.21	0.452	0.832
339	ARL13B_KAN508-13_3.tif:0013-0748	1.482	787.825	303	1731	143.596	120.67	0.381	1167.63	44906	5.81	0.172	0.679	0.999616				353	Ac-Tub_KAN508-13_3.tif:0013-0748	1.482	56.965	0	1107	143.596	120.67	0.381	84.427	3247	5.81	0.172	0.679
340	ARL13B_KAN508-13_3.tif:0014-0934	0.702	622.111	304	1036	40.256	150.569	0.677	436.748	16797	3.066	0.326	0.794	0.373904				354	Ac-Tub_KAN508-13_3.tif:0014-0934	0.702	297.889	31	887	40.256	150.569	0.677	209.131	8043	3.066	0.326	0.794
355	ARL13B_KAN508-13_4.tif:0001-0069	2.418	561.871	108	1244	169.371	10.843	0.587	1358.69	52254	2.133	0.469	0.765	1.16318				373	Ac-Tub_KAN508-13_4.tif:0001-0069	2.418	395.591	0	1013	169.371	10.843	0.587	956.598	36790	2.133	0.469	0.765
356	ARL13B_KAN508-13_4.tif:0002-0186	2.73	649.771	300	1223	154.976	29.927	0.483	1773.98	68226	3.969	0.252	0.814	1.51872				374	Ac-Tub_KAN508-13_4.tif:0002-0186	2.73	165.962	0	387	154.976	29.927	0.483	453.103	17426	3.969	0.252	0.814
357	ARL13B_KAN508-13_4.tif:0003-0222	1.274	421.429	287	603	59.776	35.878	0.442	536.932	20650	5.175	0.193	0.845	0.459673				375	Ac-Tub_KAN508-13_4.tif:0003-0222	1.274	461.02	32	1245	59.776	35.878	0.442	587.375	22590	5.175	0.193	0.845
358	ARL13B_KAN508-13_4.tif:0004-0270	1.482	426.561	0	785	138.082	43.392	0.379	632.202	24314	3.479	0.287	0.594	0.541234				376	Ac-Tub_KAN508-13_4.tif:0004-0270	1.482	559.947	0	1601	138.082	43.392	0.379	829.892	31917	3.479	0.287	0.594
359	ARL13B_KAN508-13_4.tif:0005-0336	1.976	510.789	242	861	159.362	54.021	0.378	1009.38	38820	3.865	0.259	0.587	0.864141				377	Ac-Tub_KAN508-13_4.tif:0005-0336	1.976	578.474	0	1501	159.362	54.021	0.378	1143.13	43964	3.865	0.259	0.587
360	ARL13B_KAN508-13_4.tif:0006-0377	1.326	517.902	263	770	204.827	60.847	0.491	686.779	26413	3.951	0.253	0.816	0.587959				378	Ac-Tub_KAN508-13_4.tif:0006-0377	1.326	213.353	0	707	204.827	60.847	0.491	282.923	10881	3.951	0.253	0.816
361	ARL13B_KAN508-13_4.tif:0007-0487	1.04	441.425	297	656	132.217	78.581	0.562	459.11	17657	3.892	0.257	0.879	0.393048				379	Ac-Tub_KAN508-13_4.tif:0007-0487	1.04	482.175	84	1350	132.217	78.581	0.562	501.492	19287	3.892	0.257	0.879
362	ARL13B_KAN508-13_4.tif:0008-0500	1.378	428.623	302	673	121.192	80.569	0.428	590.678	22717	4.085	0.245	0.646	0.505685				380	Ac-Tub_KAN508-13_4.tif:0008-0500	1.378	447.585	139	822	121.192	80.569	0.428	616.809	23722	4.085	0.245	0.646
363	ARL13B_KAN508-13_4.tif:0009-0511	1.118	491.698	301	703	153.512	82.326	0.538	549.751	21143	3.504	0.285	0.694	0.470647				381	Ac-Tub_KAN508-13_4.tif:0009-0511	1.118	597.093	61	1211	153.512	82.326	0.538	667.59	25675	3.504	0.285	0.694
364	ARL13B_KAN508-13_4.tif:0010-0561	0.728	375.036	300	464	183.203	90.617	0.396	273.042	10501	4.169	0.24	0.675	0.233754				382	Ac-Tub_KAN508-13_4.tif:0010-0561	0.728	1316.93	464	1926	183.203	90.617	0.396	958.782	36874	4.169	0.24	0.675
365	ARL13B_KAN508-13_4.tif:0011-0578	1.612	612.194	208	1287	93.637	93.127	0.696	986.915	37956	1.919	0.521	0.77	0.844908				383	Ac-Tub_KAN508-13_4.tif:0011-0578	1.612	673.548	0	1268	93.637	93.127	0.696	1085.83	41760	1.919	0.521	0.77
366	ARL13B_KAN508-13_4.tif:0012-0592	1.534	485.61	301	798	81.692	95.628	0.476	744.971	28651	3.354	0.298	0.756	0.637777				384	Ac-Tub_KAN508-13_4.tif:0012-0592	1.534	249.017	72	587	81.692	95.628	0.476	382.015	14692	3.354	0.298	0.756
367	ARL13B_KAN508-13_4.tif:0013-0663	2.054	496.215	193	854	157.94	106.785	0.646	1019.29	39201	1.673	0.598	0.771	0.872622				385	Ac-Tub_KAN508-13_4.tif:0013-0663	2.054	530.557	0	1128	157.94	106.785	0.646	1089.83	41914	1.673	0.598	0.771
368	ARL13B_KAN508-13_4.tif:0014-0726	1.274	595.429	307	1043	53.474	117.234	0.363	758.622	29176	5.77	0.173	0.71	0.649463				386	Ac-Tub_KAN508-13_4.tif:0014-0726	1.274	365.49	48	705	53.474	117.234	0.363	465.662	17909	5.77	0.173	0.71
369	ARL13B_KAN508-13_4.tif:0015-0750	2.106	518.877	252	986	137.185	121.154	0.48	1092.82	42029	2.37	0.422	0.664	0.935574				387	Ac-Tub_KAN508-13_4.tif:0015-0750	2.106	324.531	0	1439	137.185	121.154	0.48	683.503	26287	2.37	0.422	0.664
370	ARL13B_KAN508-13_4.tif:0016-0911	0.728	537.536	326	748	45.743	147.077	0.564	391.35	15051	2.942	0.34	0.747	0.335038				388	Ac-Tub_KAN508-13_4.tif:0016-0911	0.728	756.5	100	1433	45.743	147.077	0.564	550.765	21182	2.942	0.34	0.747
371	ARL13B_KAN508-13_4.tif:0017-0961	1.196	518.761	304	902	207.262	155.101	0.499	620.475	23863	3.472	0.288	0.713	0.531195				389	Ac-Tub_KAN508-13_4.tif:0017-0961	1.196	246.174	0	565	207.262	155.101	0.499	294.442	11324	3.472	0.288	0.713
372	ARL13B_KAN508-13_4.tif:0018-0971	1.924	437.351	281	813	179.36	156.563	0.469	841.515	32364	3.881	0.258	0.692	0.720429				390	Ac-Tub_KAN508-13_4.tif:0018-0971	1.924	111.905	0	450	179.36	156.563	0.469	215.319	8281	3.881	0.258	0.692
391	ARL13B_KAN508-13_5.tif:0001-0030	1.638	1059.57	307	2165	144.965	4.987	0.66	1735.68	66753	2.62	0.382	0.829	1.48593				406	Ac-Tub_KAN508-13_5.tif:0001-0030	1.638	140.921	0	1023	144.965	4.987	0.66	230.842	8878	2.62	0.382	0.829
392	ARL13B_KAN508-13_5.tif:0002-0097	0.416	355.375	305	475	62.988	15.732	0.652	147.845	5686	2.804	0.357	0.762	0.126571				407	Ac-Tub_KAN508-13_5.tif:0002-0097	0.416	846.312	434	1132	62.988	15.732	0.652	352.087	13541	2.804	0.357	0.762
393	ARL13B_KAN508-13_5.tif:0003-0102	0.728	340.143	270	401	60.797	16.459	0.493	247.639	9524	3.486	0.287	0.767	0.212006				408	Ac-Tub_KAN508-13_5.tif:0003-0102	0.728	273.857	0	601	60.797	16.459	0.493	199.38	7668	3.486	0.287	0.767
394	ARL13B_KAN508-13_5.tif:0004-0178	0.832	478.969	308	695	114.785	28.839	0.52	398.526	15327	3.533	0.283	0.719	0.341182				409	Ac-Tub_KAN508-13_5.tif:0004-0178	0.832	537.781	11	2540	114.785	28.839	0.52	447.461	17209	3.533	0.283	0.719
395	ARL13B_KAN508-13_5.tif:0005-0266	0.598	522.957	321	860	13.471	43.05	0.636	312.747	12028	2.541	0.394	0.836	0.267746				410	Ac-Tub_KAN508-13_5.tif:0005-0266	0.598	89.783	0	369	13.471	43.05	0.636	53.693	2065	2.541	0.394	0.836
396	ARL13B_KAN508-13_5.tif:0006-0301	2.314	931.258	74	2232	127.763	48.566	0.507	2155.06	82882	4.081	0.245	0.809	1.84497				411	Ac-Tub_KAN508-13_5.tif:0006-0301	2.314	274.438	0	1617	127.763	48.566	0.507	635.088	24425	4.081	0.245	0.809
397	ARL13B_KAN508-13_5.tif:0007-0311	1.014	575.077	317	1001	177.695	50.109	0.451	583.163	22428	4.813	0.208	0.736	0.499252				412	Ac-Tub_KAN508-13_5.tif:0007-0311	1.014	107.436	0	428	177.695	50.109	0.451	108.947	4190	4.813	0.208	0.736
398	ARL13B_KAN508-13_5.tif:0008-0342	1.768	766.412	123	2702	12.286	55.313	0.527	1355.1	52116	2.514	0.398	0.69	1.16011				413	Ac-Tub_KAN508-13_5.tif:0008-0342	1.768	593.235	0	3007	12.286	55.313	0.527	1048.9	40340	2.514	0.398	0.69
399	ARL13B_KAN508-13_5.tif:0009-0375	1.716	606.924	309	1172	143.261	60.61	0.331	1041.55	40057	6.558	0.152	0.677	0.891677				414	Ac-Tub_KAN508-13_5.tif:0009-0375	1.716	282.076	0	990	143.261	60.61	0.331	484.071	18617	6.558	0.152	0.677
400	ARL13B_KAN508-13_5.tif:0010-0442	0.676	397.346	308	574	57.262	71.434	0.323	268.622	10331	4.309	0.232	0.634	0.22997				415	Ac-Tub_KAN508-13_5.tif:0010-0442	0.676	812.692	51	1826	57.262	71.434	0.323	549.413	21130	4.309	0.232	0.634
401	ARL13B_KAN508-13_5.tif:0011-0523	1.43	652.073	267	1114	185.632	84.409	0.419	932.52	35864	4.688	0.213	0.696	0.79834				416	Ac-Tub_KAN508-13_5.tif:0011-0523	1.43	216.673	0	1082	185.632	84.409	0.419	309.861	11917	4.688	0.213	0.696
402	ARL13B_KAN508-13_5.tif:0012-0699	1.976	774.079	301	1627	148.225	112.754	0.579	1529.67	58830	2.988	0.335	0.835	1.30957				417	Ac-Tub_KAN508-13_5.tif:0012-0699	1.976	358.092	0	1632	148.225	112.754	0.579	707.633	27215	2.988	0.335	0.835
403	ARL13B_KAN508-13_5.tif:0013-0749	1.222	579.128	326	849	72.448	120.73	0.474	707.737	27219	4.497	0.222	0.862	0.6059				418	Ac-Tub_KAN508-13_5.tif:0013-0749	1.222	149.511	0	414	72.448	120.73	0.474	182.713	7027	4.497	0.222	0.862
404	ARL13B_KAN508-13_5.tif:0014-0804	1.846	726.507	301	1563	105.593	129.542	0.624	1341.21	51582	2.348	0.426	0.84	1.14823				419	Ac-Tub_KAN508-13_5.tif:0014-0804	1.846	237.986	0	1194	105.593	129.542	0.624	439.348	16897	2.348	0.426	0.84
405	ARL13B_KAN508-13_5.tif:0015-0838	0.286	351.455	301	420	116.826	135.149	0.53	100.522	3866	2.901	0.345	0.629	0.0860579				420	Ac-Tub_KAN508-13_5.tif:0015-0838	0.286	866.091	328	1297	116.826	135.149	0.53	247.717	9527	2.901	0.345	0.629
421	ARL13B_KAN508-13_6.tif:0001-0068	0.312	405.5	311	555	188.152	11.086	0.781	126.524	4866	2.122	0.471	0.828	0.108318				434	Ac-Tub_KAN508-13_6.tif:0001-0068	0.312	542.917	220	1083	188.152	11.086	0.781	169.4	6515	2.122	0.471	0.828
422	ARL13B_KAN508-13_6.tif:0002-0088	0.312	403.583	304	486	133.475	14.324	0.781	125.926	4843	2.282	0.438	0.8	0.107806				435	Ac-Tub_KAN508-13_6.tif:0002-0088	0.312	352.667	0	745	133.475	14.324	0.781	110.039	4232	2.282	0.438	0.8
423	ARL13B_KAN508-13_6.tif:0003-0289	2.496	742.615	309	1511	57.764	46.558	0.625	1853.68	71291	3.186	0.314	0.873	1.58695				436	Ac-Tub_KAN508-13_6.tif:0003-0289	2.496	706.688	14	1619	57.764	46.558	0.625	1764	67842	3.186	0.314	0.873
424	ARL13B_KAN508-13_6.tif:0004-0337	0.78	625.333	300	1011	10.132	54.347	0.714	487.789	18760	2.166	0.462	0.789	0.417601				437	Ac-Tub_KAN508-13_6.tif:0004-0337	0.78	608.4	76	1188	10.132	54.347	0.714	474.581	18252	2.166	0.462	0.789
425	ARL13B_KAN508-13_6.tif:0005-0377	1.664	467.359	75	894	15.83	60.907	0.68	777.733	29911	1.977	0.506	0.831	0.665825				438	Ac-Tub_KAN508-13_6.tif:0005-0377	1.664	936.219	218	1594	15.83	60.907	0.68	1557.96	59918	1.977	0.506	0.831
426	ARL13B_KAN508-13_6.tif:0006-0479	1.638	923.54	303	2076	142.219	77.463	0.66	1512.85	58183	2.532	0.395	0.792	1.29516				439	Ac-Tub_KAN508-13_6.tif:0006-0479	1.638	617.476	11	2375	142.219	77.463	0.66	1011.49	38901	2.532	0.395	0.792
427	ARL13B_KAN508-13_6.tif:0007-0487	2.392	1063.04	304	2502	188.615	78.709	0.692	2542.95	97800	1.92	0.521	0.811	2.17705				440	Ac-Tub_KAN508-13_6.tif:0007-0487	2.392	725.891	0	2393	188.615	78.709	0.692	1736.44	66782	1.92	0.521	0.811
428	ARL13B_KAN508-13_6.tif:0008-0599	1.326	1068.43	328	2038	130.649	96.66	0.534	1416.83	54490	3.892	0.257	0.816	1.21296				441	Ac-Tub_KAN508-13_6.tif:0008-0599	1.326	1086.22	60	3568	130.649	96.66	0.534	1440.41	55397	3.892	0.257	0.816
429	ARL13B_KAN508-13_6.tif:0009-0648	1.872	1213.31	314	3220	125.26	104.539	0.625	2271.45	87358	3.054	0.327	0.828	1.94461				442	Ac-Tub_KAN508-13_6.tif:0009-0648	1.872	484.903	0	1605	125.26	104.539	0.625	907.793	34913	3.054	0.327	0.828
430	ARL13B_KAN508-13_6.tif:0010-0652	0.702	448.815	301	639	215.385	105.245	0.643	315.087	12118	2.899	0.345	0.761	0.269749				443	Ac-Tub_KAN508-13_6.tif:0010-0652	0.702	752.778	12	2189	215.385	105.245	0.643	528.482	20325	2.899	0.345	0.761
431	ARL13B_KAN508-13_6.tif:0011-0711	1.69	1162.12	241	3117	177.617	114.63	0.791	1964.11	75538	2.246	0.445	0.922	1.68149				444	Ac-Tub_KAN508-13_6.tif:0011-0711	1.69	1202.69	77	2922	177.617	114.63	0.791	2032.67	78175	2.246	0.445	0.922
432	ARL13B_KAN508-13_6.tif:0012-0798	4.264	964.689	36	3717	146.326	128.731	0.325	4113.68	158209	4.066	0.246	0.66	3.52176				445	Ac-Tub_KAN508-13_6.tif:0012-0798	4.264	505.506	0	2298	146.326	128.731	0.325	2155.61	82903	4.066	0.246	0.66
433	ARL13B_KAN508-13_6.tif:0013-1030	0.806	712.387	300	1538	26.926	165.887	0.608	574.219	22084	2.347	0.426	0.861	0.491594				446	Ac-Tub_KAN508-13_6.tif:0013-1030	0.806	831.871	90	2153	26.926	165.887	0.608	670.528	25788	2.347	0.426	0.861
										41217.3				0.917505
447	ARL13B_KAN508-14_1.tif:0001-0044	1.326	453.176	286	791	108.428	7.223	0.4	600.948	23112	4.101	0.244	0.618	0.514478				458	Ac-Tub_KAN508-14_1.tif:0001-0044	1.326	287.588	0	1248	108.428	7.223	0.4	381.365	14667	4.101	0.244	0.618
448	ARL13B_KAN508-14_1.tif:0002-0084	1.69	664.969	16	1689	34.07	13.601	0.74	1123.87	43223	1.836	0.545	0.828	0.962152				459	Ac-Tub_KAN508-14_1.tif:0002-0084	1.69	620.062	0	2020	34.07	13.601	0.74	1047.97	40304	1.836	0.545	0.828
449	ARL13B_KAN508-14_1.tif:0003-0146	1.638	511.444	301	835	28.317	23.549	0.54	837.796	32221	3.191	0.313	0.733	0.717246				460	Ac-Tub_KAN508-14_1.tif:0003-0146	1.638	622.619	106	1199	28.317	23.549	0.54	1019.91	39225	3.191	0.313	0.733
450	ARL13B_KAN508-14_1.tif:0004-0154	3.172	890.287	0	2232	95.172	24.745	0.708	2824.16	108615	1.248	0.801	0.803	2.41779				461	Ac-Tub_KAN508-14_1.tif:0004-0154	3.172	761.393	0	3164	95.172	24.745	0.708	2415.28	92890	1.248	0.801	0.803
451	ARL13B_KAN508-14_1.tif:0005-0268	1.092	444.619	301	732	148.649	43.292	0.53	485.553	18674	3.881	0.258	0.8	0.415687				462	Ac-Tub_KAN508-14_1.tif:0005-0268	1.092	390.738	133	819	148.649	43.292	0.53	426.712	16411	3.881	0.258	0.8
452	ARL13B_KAN508-14_1.tif:0006-0375	2.132	708.11	305	1837	128.683	60.532	0.296	1509.78	58065	7.505	0.133	0.636	1.29254				463	Ac-Tub_KAN508-14_1.tif:0006-0375	2.132	237.841	36	1482	128.683	60.532	0.296	507.109	19503	7.505	0.133	0.636
453	ARL13B_KAN508-14_1.tif:0007-0380	1.222	565.702	308	1019	37.439	61.222	0.432	691.33	26588	4.609	0.217	0.729	0.591854				464	Ac-Tub_KAN508-14_1.tif:0007-0380	1.222	590.277	66	1294	37.439	61.222	0.432	721.361	27743	4.609	0.217	0.729
454	ARL13B_KAN508-14_1.tif:0008-0480	1.17	931.467	316	1665	94.444	77.491	0.674	1089.88	41916	2.689	0.372	0.826	0.933058				465	Ac-Tub_KAN508-14_1.tif:0008-0480	1.17	519.267	0	1680	94.444	77.491	0.674	607.579	23367	2.689	0.372	0.826
455	ARL13B_KAN508-14_1.tif:0009-0719	0.546	388.81	312	483	207.878	116.027	0.772	212.303	8165	2.494	0.401	0.933	0.181754				466	Ac-Tub_KAN508-14_1.tif:0009-0719	0.546	254.286	36	467	207.878	116.027	0.772	138.848	5340	2.494	0.401	0.933
456	ARL13B_KAN508-14_1.tif:0010-0727	1.404	725.093	300	1404	33.364	117.306	0.532	1018.09	39155	3.632	0.275	0.735	0.871598				467	Ac-Tub_KAN508-14_1.tif:0010-0727	1.404	673.796	20	1701	33.364	117.306	0.532	946.067	36385	3.632	0.275	0.735
457	ARL13B_KAN508-14_1.tif:0011-0735	2.262	754.713	26	1800	148.321	118.514	0.451	1707.26	65660	4.29	0.233	0.757	1.4616				468	Ac-Tub_KAN508-14_1.tif:0011-0735	2.262	515.805	0	1955	148.321	118.514	0.451	1166.82	44875	4.29	0.233	0.757
469	ARL13B_KAN508-14_2.tif:0001-0022	1.924	571.608	311	981	202.624	3.515	0.55	1099.84	42299	3.783	0.264	0.836	0.941584				479	Ac-Tub_KAN508-14_2.tif:0001-0022	1.924	109.405	0	828	202.624	3.515	0.55	210.509	8096	3.783	0.264	0.836
470	ARL13B_KAN508-14_2.tif:0002-0026	0.65	380.56	305	617	19.708	4.247	0.432	247.379	9514	4.9	0.204	0.714	0.211783				480	Ac-Tub_KAN508-14_2.tif:0002-0026	0.65	1069.56	0	2524	19.708	4.247	0.432	695.256	26739	4.9	0.204	0.714
471	ARL13B_KAN508-14_2.tif:0003-0315	1.56	775.267	54	1802	47.51	50.85	0.617	1209.49	46516	1.574	0.635	0.732	1.03546				481	Ac-Tub_KAN508-14_2.tif:0003-0315	1.56	740.767	0	2354	47.51	50.85	0.617	1155.67	44446	1.574	0.635	0.732
472	ARL13B_KAN508-14_2.tif:0004-0391	1.482	745.772	300	1363	198.325	63.042	0.511	1105.3	42509	4.066	0.246	0.792	0.946259				482	Ac-Tub_KAN508-14_2.tif:0004-0391	1.482	1183.79	10	2777	198.325	63.042	0.511	1754.48	67476	4.066	0.246	0.792
473	ARL13B_KAN508-14_2.tif:0005-0576	1.508	641.638	307	1342	41.636	92.808	0.474	967.648	37215	3.864	0.259	0.725	0.828413				483	Ac-Tub_KAN508-14_2.tif:0005-0576	1.508	1062.48	271	2156	41.636	92.808	0.474	1602.32	61624	3.864	0.259	0.725
474	ARL13B_KAN508-14_2.tif:0006-0718	2.054	888.759	99	2464	124.306	115.885	0.609	1825.62	70212	3.112	0.321	0.836	1.56293				484	Ac-Tub_KAN508-14_2.tif:0006-0718	2.054	1093.53	0	3638	124.306	115.885	0.609	2246.25	86389	3.112	0.321	0.836
475	ARL13B_KAN508-14_2.tif:0007-0786	1.482	746.211	305	2058	83.622	126.75	0.419	1105.95	42534	4.882	0.205	0.671	0.946815				485	Ac-Tub_KAN508-14_2.tif:0007-0786	1.482	593.491	32	2471	83.622	126.75	0.419	879.607	33829	4.882	0.205	0.671
476	ARL13B_KAN508-14_2.tif:0008-0814	3.666	624.582	0	2737	101.071	130.854	0.331	2289.85	88066	3.165	0.316	0.596	1.96037				486	Ac-Tub_KAN508-14_2.tif:0008-0814	3.666	367.369	0	2518	101.071	130.854	0.331	1346.86	51799	3.165	0.316	0.596
477	ARL13B_KAN508-14_2.tif:0009-0861	1.482	1424.33	304	3844	27.801	138.77	0.693	2110.99	81187	2.344	0.427	0.898	1.80724				487	Ac-Tub_KAN508-14_2.tif:0009-0861	1.482	355.719	0	1258	27.801	138.77	0.693	527.208	20276	2.344	0.427	0.898
478	ARL13B_KAN508-14_2.tif:0010-0920	0.442	354.294	302	424	74.464	148.469	0.405	156.607	6023	5.021	0.199	0.667	0.134073				488	Ac-Tub_KAN508-14_2.tif:0010-0920	0.442	762.765	349	1252	74.464	148.469	0.405	337.162	12967	5.021	0.199	0.667
489	ARL13B_KAN508-14_3.tif:0001-0013	2.34	596.467	314	1124	71.385	2.035	0.542	1395.82	53682	3.656	0.273	0.845	1.19497				510	Ac-Tub_KAN508-14_3.tif:0001-0013	2.34	432.422	23	1276	71.385	2.035	0.542	1011.93	38918	3.656	0.273	0.845
490	ARL13B_KAN508-14_3.tif:0002-0011	2.236	993.07	67	3514	173.906	1.766	0.756	2220.64	85404	1.954	0.512	0.86	1.90111				511	Ac-Tub_KAN508-14_3.tif:0002-0011	2.236	668.942	0	3395	173.906	1.766	0.756	1495.84	57529	1.954	0.512	0.86
491	ARL13B_KAN508-14_3.tif:0003-0023	1.456	646.161	300	1132	34.415	3.835	0.792	940.867	36185	1.952	0.512	0.868	0.805485				512	Ac-Tub_KAN508-14_3.tif:0003-0023	1.456	658.018	23	1729	34.415	3.835	0.792	958.132	36849	1.952	0.512	0.868
492	ARL13B_KAN508-14_3.tif:0004-0095	2.366	784.505	162	1421	192.902	15.461	0.337	1856.25	71390	6.597	0.152	0.717	1.58916				513	Ac-Tub_KAN508-14_3.tif:0004-0095	2.366	737.857	0	3277	192.902	15.461	0.337	1745.88	67145	6.597	0.152	0.717
493	ARL13B_KAN508-14_3.tif:0005-0098	1.352	770.038	313	1893	4.475	15.734	0.352	1041.15	40042	4.799	0.208	0.619	0.891343				514	Ac-Tub_KAN508-14_3.tif:0005-0098	1.352	343.827	0	1305	4.475	15.734	0.352	464.882	17879	4.799	0.208	0.619
494	ARL13B_KAN508-14_3.tif:0006-0096	1.014	446.667	304	637	102.946	15.499	0.345	452.947	17420	5.994	0.167	0.667	0.387773				515	Ac-Tub_KAN508-14_3.tif:0006-0096	1.014	848.436	155	1632	102.946	15.499	0.345	860.366	33089	5.994	0.167	0.667
495	ARL13B_KAN508-14_3.tif:0007-0256	2.184	835.095	206	1848	166.734	41.22	0.536	1823.96	70148	3.089	0.324	0.792	1.56151				516	Ac-Tub_KAN508-14_3.tif:0007-0256	2.184	453.095	0	1586	166.734	41.22	0.536	989.62	38060	3.089	0.324	0.792
496	ARL13B_KAN508-14_3.tif:0008-0271	1.274	469.061	312	651	24.541	43.704	0.413	597.62	22984	4.686	0.213	0.754	0.511628				517	Ac-Tub_KAN508-14_3.tif:0008-0271	1.274	1334.18	320	2692	24.541	43.704	0.413	1699.85	65375	4.686	0.213	0.754
497	ARL13B_KAN508-14_3.tif:0009-0346	1.378	751.415	316	1368	182.725	55.834	0.496	1035.51	39825	4.201	0.238	0.768	0.886512				518	Ac-Tub_KAN508-14_3.tif:0009-0346	1.378	630.415	32	2489	182.725	55.834	0.496	868.764	33412	4.201	0.238	0.768
498	ARL13B_KAN508-14_3.tif:0010-0405	0.598	427.609	319	589	95.716	65.331	0.415	255.725	9835	5.422	0.184	0.648	0.218929				519	Ac-Tub_KAN508-14_3.tif:0010-0405	0.598	342.043	0	1061	95.716	65.331	0.415	204.554	7867	5.422	0.184	0.648
499	ARL13B_KAN508-14_3.tif:0011-0501	1.872	975.542	208	2093	139.495	80.847	0.633	1826.32	70239	2.963	0.338	0.837	1.56353				520	Ac-Tub_KAN508-14_3.tif:0011-0501	1.872	390.833	0	2095	139.495	80.847	0.633	731.684	28140	2.963	0.338	0.837
500	ARL13B_KAN508-14_3.tif:0012-0511	2.158	986.928	304	1960	202.698	82.448	0.561	2129.92	81915	3.469	0.288	0.802	1.82344				521	Ac-Tub_KAN508-14_3.tif:0012-0511	2.158	582.952	0	2054	202.698	82.448	0.561	1258.09	48385	3.469	0.288	0.802
501	ARL13B_KAN508-14_3.tif:0013-0548	2.366	542.923	47	1237	41.657	88.401	0.503	1284.63	49406	2.871	0.348	0.703	1.09979				522	Ac-Tub_KAN508-14_3.tif:0013-0548	2.366	292.484	0	1832	41.657	88.401	0.503	692.058	26616	2.871	0.348	0.703
502	ARL13B_KAN508-14_3.tif:0014-0588	2.132	798.683	57	2659	75.961	95.051	0.537	1702.89	65492	3.759	0.266	0.824	1.45786				523	Ac-Tub_KAN508-14_3.tif:0014-0588	2.132	602.244	57	2227	75.961	95.051	0.537	1284.06	49384	3.759	0.266	0.824
503	ARL13B_KAN508-14_3.tif:0015-0675	0.962	466.189	306	713	121.275	108.855	0.496	448.501	17249	4.341	0.23	0.747	0.383966				524	Ac-Tub_KAN508-14_3.tif:0015-0675	0.962	791.243	127	1866	121.275	108.855	0.496	761.222	29276	4.341	0.23	0.747
504	ARL13B_KAN508-14_3.tif:0016-0715	1.196	358.239	296	437	1.122	115.238	0.506	428.48	16479	3.448	0.29	0.76	0.366826				525	Ac-Tub_KAN508-14_3.tif:0016-0715	1.196	363.978	0	762	1.122	115.238	0.506	435.344	16743	3.448	0.29	0.76
505	ARL13B_KAN508-14_3.tif:0017-0736	2.21	633.588	260	1797	185.262	118.565	0.647	1400.31	53855	2.863	0.349	0.837	1.19882				526	Ac-Tub_KAN508-14_3.tif:0017-0736	2.21	565.882	0	2718	185.262	118.565	0.647	1250.67	48100	2.863	0.349	0.837
506	ARL13B_KAN508-14_3.tif:0018-0803	0.468	331.389	301	383	52.944	129.654	0.539	155.099	5965	3.526	0.284	0.837	0.132782				527	Ac-Tub_KAN508-14_3.tif:0018-0803	0.468	162.889	30	483	52.944	129.654	0.539	76.237	2932	3.526	0.284	0.837
507	ARL13B_KAN508-14_3.tif:0019-0882	1.248	919.188	85	2212	128.258	142.327	0.775	1147.21	44121	2.35	0.426	0.932	0.982142				528	Ac-Tub_KAN508-14_3.tif:0019-0882	1.248	1109.21	232	2688	128.258	142.327	0.775	1384.38	53242	2.35	0.426	0.932
508	ARL13B_KAN508-14_3.tif:0020-0918	1.482	665.368	144	1585	220.119	148.119	0.594	986.135	37926	3.351	0.298	0.884	0.84424				529	Ac-Tub_KAN508-14_3.tif:0020-0918	1.482	307.526	0	1393	220.119	148.119	0.594	455.781	17529	3.351	0.298	0.884
509	ARL13B_KAN508-14_3.tif:0021-0917	0.39	392.667	321	494	86.984	147.968	0.612	153.149	5890	3.236	0.309	0.714	0.131113				530	Ac-Tub_KAN508-14_3.tif:0021-0917	0.39	1377.8	579	1866	86.984	147.968	0.612	537.374	20667	3.236	0.309	0.714
531	ARL13B_KAN508-14_4.tif:0001-0014	2.262	689.207	300	1657	89.686	2.316	0.372	1559.08	59961	5.504	0.182	0.68	1.33474				545	Ac-Tub_KAN508-14_4.tif:0001-0014	2.262	894.448	0	3455	89.686	2.316	0.372	2023.36	77817	5.504	0.182	0.68
532	ARL13B_KAN508-14_4.tif:0002-0091	1.742	789.164	261	1588	156.938	14.86	0.427	1374.81	52874	2.924	0.342	0.644	1.17699				546	Ac-Tub_KAN508-14_4.tif:0002-0091	1.742	606.448	0	3174	156.938	14.86	0.427	1056.5	40632	2.924	0.342	0.644
533	ARL13B_KAN508-14_4.tif:0003-0176	2.86	662.627	88	1897	121.899	28.483	0.34	1895.23	72889	6.795	0.147	0.783	1.62252				547	Ac-Tub_KAN508-14_4.tif:0003-0176	2.86	676.536	0	3432	121.899	28.483	0.34	1935.01	74419	6.795	0.147	0.783
534	ARL13B_KAN508-14_4.tif:0004-0324	1.508	1137.41	307	2740	120.237	52.303	0.62	1715.32	65970	3.17	0.315	0.806	1.46851				548	Ac-Tub_KAN508-14_4.tif:0004-0324	1.508	984.879	0	3470	120.237	52.303	0.62	1485.29	57123	3.17	0.315	0.806
535	ARL13B_KAN508-14_4.tif:0005-0357	1.924	746.081	308	1328	151.625	57.425	0.386	1435.55	55210	3.679	0.272	0.602	1.22899				549	Ac-Tub_KAN508-14_4.tif:0005-0357	1.924	1273.2	36	3445	151.625	57.425	0.386	2449.79	94217	3.679	0.272	0.602
536	ARL13B_KAN508-14_4.tif:0006-0375	1.43	604.709	292	1084	41.63	60.544	0.385	864.786	33259	4.453	0.225	0.667	0.740352				550	Ac-Tub_KAN508-14_4.tif:0006-0375	1.43	768.436	107	2072	41.63	60.544	0.385	1098.93	42264	4.453	0.225	0.667
537	ARL13B_KAN508-14_4.tif:0007-0415	1.404	735.833	319	1352	8.278	66.928	0.447	1033.17	39735	4.809	0.208	0.761	0.884509				551	Ac-Tub_KAN508-14_4.tif:0007-0415	1.404	810.426	0	2227	8.278	66.928	0.447	1137.91	43763	4.809	0.208	0.761
538	ARL13B_KAN508-14_4.tif:0008-0486	0.832	406.875	302	589	197.204	78.262	0.543	338.54	13020	3.447	0.29	0.753	0.289828				552	Ac-Tub_KAN508-14_4.tif:0008-0486	0.832	538.969	5	2123	197.204	78.262	0.543	448.449	17247	3.447	0.29	0.753
539	ARL13B_KAN508-14_4.tif:0009-0552	2.158	898.663	303	1830	139.849	89.054	0.345	1939.43	74589	6.674	0.15	0.692	1.66037				553	Ac-Tub_KAN508-14_4.tif:0009-0552	2.158	643.012	0	3538	139.849	89.054	0.345	1387.7	53370	6.674	0.15	0.692
540	ARL13B_KAN508-14_4.tif:0010-0795	2.444	939.968	300	1775	145.753	128.269	0.399	2297.42	88357	5.176	0.193	0.783	1.96684				554	Ac-Tub_KAN508-14_4.tif:0010-0795	2.444	722.468	0	2399	145.753	128.269	0.399	1765.82	67912	5.176	0.193	0.783
541	ARL13B_KAN508-14_4.tif:0011-0864	1.846	1106.07	223	3531	12.994	139.239	0.563	2041.93	78531	1.996	0.501	0.71	1.74812				555	Ac-Tub_KAN508-14_4.tif:0011-0864	1.846	724.042	31	1990	12.994	139.239	0.563	1336.66	51407	1.996	0.501	0.71
542	ARL13B_KAN508-14_4.tif:0012-0889	1.846	1131.55	212	3348	117.516	143.343	0.744	2088.97	80340	1.282	0.78	0.821	1.78838				556	Ac-Tub_KAN508-14_4.tif:0012-0889	1.846	781.225	0	3567	117.516	143.343	0.744	1442.23	55467	1.282	0.78	0.821
543	ARL13B_KAN508-14_4.tif:0013-0985	2.314	758.539	143	2037	87.21	158.812	0.351	1755.37	67510	5.27	0.19	0.622	1.50279				557	Ac-Tub_KAN508-14_4.tif:0013-0985	2.314	700.056	0	2794	87.21	158.812	0.351	1620.03	62305	5.27	0.19	0.622
544	ARL13B_KAN508-14_4.tif:0014-0999	1.222	485.574	141	729	116.524	161.094	0.476	593.408	22822	2.992	0.334	0.648	0.508022				558	Ac-Tub_KAN508-14_4.tif:0014-0999	1.222	482.255	92	1005	116.524	161.094	0.476	589.351	22666	2.992	0.334	0.648
559	ARL13B_KAN508-14_5.tif:0001-0058	3.64	1080.36	26	3084	106.769	9.229	0.579	3932.76	151251	1.327	0.754	0.747	3.36688				573	Ac-Tub_KAN508-14_5.tif:0001-0058	3.64	834.743	0	2918	106.769	9.229	0.579	3038.65	116864	1.327	0.754	0.747
560	ARL13B_KAN508-14_5.tif:0002-0062	3.25	1405.86	303	3684	200.363	9.846	0.718	4569.33	175733	1.891	0.529	0.822	3.91185				574	Ac-Tub_KAN508-14_5.tif:0002-0062	3.25	820.216	0	3313	200.363	9.846	0.718	2665.86	102527	1.891	0.529	0.822
561	ARL13B_KAN508-14_5.tif:0003-0096	2.236	894.453	311	2275	107.773	15.315	0.47	2000.12	76923	4.098	0.244	0.738	1.71232				575	Ac-Tub_KAN508-14_5.tif:0003-0096	2.236	375.221	0	2096	107.773	15.315	0.47	839.045	32269	4.098	0.244	0.738
562	ARL13B_KAN508-14_5.tif:0004-0111	1.274	1263.86	318	3024	12.086	17.884	0.734	1610.25	61929	2.513	0.398	0.838	1.37855				576	Ac-Tub_KAN508-14_5.tif:0004-0111	1.274	1227.29	52	3733	12.086	17.884	0.734	1563.66	60137	2.513	0.398	0.838
563	ARL13B_KAN508-14_5.tif:0005-0154	2.418	928.323	205	2221	144.881	24.771	0.609	2244.82	86334	2.928	0.342	0.857	1.92181				577	Ac-Tub_KAN508-14_5.tif:0005-0154	2.418	391.656	0	1763	144.881	24.771	0.609	947.081	36424	2.928	0.342	0.857
564	ARL13B_KAN508-14_5.tif:0006-0250	1.69	868.262	308	1774	69.029	40.341	0.705	1467.45	56437	2.552	0.392	0.855	1.2563				578	Ac-Tub_KAN508-14_5.tif:0006-0250	1.69	642.431	0	1867	69.029	40.341	0.705	1085.77	41758	2.552	0.392	0.855
565	ARL13B_KAN508-14_5.tif:0007-0254	1.924	777.014	314	1420	160.928	40.992	0.75	1495.06	57499	2.405	0.416	0.881	1.27994				579	Ac-Tub_KAN508-14_5.tif:0007-0254	1.924	370.946	0	1492	160.928	40.992	0.75	713.743	27450	2.405	0.416	0.881
566	ARL13B_KAN508-14_5.tif:0008-0495	2.496	485.427	301	822	118.525	79.565	0.457	1211.7	46601	3.513	0.285	0.716	1.03735				580	Ac-Tub_KAN508-14_5.tif:0008-0495	2.496	572.438	179	872	118.525	79.565	0.457	1428.89	54954	3.513	0.285	0.716
567	ARL13B_KAN508-14_5.tif:0009-0555	1.17	588.356	175	1479	214.669	89.564	0.485	688.417	26476	4.105	0.244	0.789	0.589361				581	Ac-Tub_KAN508-14_5.tif:0009-0555	1.17	419.333	79	754	214.669	89.564	0.485	490.65	18870	4.105	0.244	0.789
568	ARL13B_KAN508-14_5.tif:0010-0566	2.73	994.048	6	3150	157.454	91.211	0.34	2713.91	104375	5.517	0.181	0.675	2.32341				582	Ac-Tub_KAN508-14_5.tif:0010-0566	2.73	367.962	0	1592	157.454	91.211	0.34	1004.6	38636	5.517	0.181	0.675
569	ARL13B_KAN508-14_5.tif:0011-0704	0.468	422.444	304	692	26.741	113.628	0.34	197.716	7604	5.69	0.176	0.59	0.169267				583	Ac-Tub_KAN508-14_5.tif:0011-0704	0.468	201.167	0	543	26.741	113.628	0.34	94.152	3621	5.69	0.176	0.59
570	ARL13B_KAN508-14_5.tif:0012-0847	2.652	565.402	164	1208	129.985	136.391	0.234	1499.54	57671	3.975	0.252	0.438	1.28377				584	Ac-Tub_KAN508-14_5.tif:0012-0847	2.652	422.627	0	1911	129.985	136.391	0.234	1120.88	43108	3.975	0.252	0.438
571	ARL13B_KAN508-14_5.tif:0013-0871	0.52	429.25	301	615	131.378	140.537	0.541	223.223	8585	3.684	0.271	0.702	0.191104				585	Ac-Tub_KAN508-14_5.tif:0013-0871	0.52	478.65	63	921	131.378	140.537	0.541	248.913	9573	3.684	0.271	0.702
572	ARL13B_KAN508-14_5.tif:0014-0907	1.456	689.732	305	1360	87.95	146.199	0.511	1004.31	38625	3.835	0.261	0.783	0.8598				586	Ac-Tub_KAN508-14_5.tif:0014-0907	1.456	596.571	40	2272	87.95	146.199	0.511	868.66	33408	3.835	0.261	0.783
587	ARL13B_KAN508-14_6.tif:0001-0006	0.858	502.182	313	720	205.088	0.97	0.665	430.898	16572	2.382	0.42	0.815	0.368896				599	Ac-Tub_KAN508-14_6.tif:0001-0006	0.858	708.242	53	1308	205.088	0.97	0.665	607.709	23372	2.382	0.42	0.815
588	ARL13B_KAN508-14_6.tif:0002-0080	1.664	557.562	314	868	83.943	12.978	0.658	927.84	35684	2.554	0.391	0.883	0.794333				600	Ac-Tub_KAN508-14_6.tif:0002-0080	1.664	559.656	201	1058	83.943	12.978	0.658	931.324	35818	2.554	0.391	0.883
589	ARL13B_KAN508-14_6.tif:0003-0215	2.704	693.913	196	1686	130.186	34.669	0.689	1876.45	72167	3.079	0.325	0.963	1.60645				601	Ac-Tub_KAN508-14_6.tif:0003-0215	2.704	575.673	0	2007	130.186	34.669	0.689	1556.71	59870	3.079	0.325	0.963
590	ARL13B_KAN508-14_6.tif:0004-0273	1.404	739.352	302	1344	101.396	44.012	0.647	1038.11	39925	3.129	0.32	0.844	0.888738				602	Ac-Tub_KAN508-14_6.tif:0004-0273	1.404	884.13	0	3530	101.396	44.012	0.647	1241.39	47743	3.129	0.32	0.844
591	ARL13B_KAN508-14_6.tif:0005-0447	1.56	436.15	183	680	191.401	71.909	0.327	680.435	26169	5.012	0.2	0.603	0.582527				603	Ac-Tub_KAN508-14_6.tif:0005-0447	1.56	1202.92	12	3582	191.401	71.909	0.327	1876.66	72175	5.012	0.2	0.603
592	ARL13B_KAN508-14_6.tif:0006-0623	1.924	1007.73	339	3042	166.798	100.422	0.532	1938.99	74572	3.339	0.299	0.763	1.65999				604	Ac-Tub_KAN508-14_6.tif:0006-0623	1.924	999.946	34	3053	166.798	100.422	0.532	1924.01	73996	3.339	0.299	0.763
593	ARL13B_KAN508-14_6.tif:0007-0695	1.69	796	300	2000	92.531	112.075	0.74	1345.32	51740	2.354	0.425	0.855	1.15174				605	Ac-Tub_KAN508-14_6.tif:0007-0695	1.69	826.969	21	2227	92.531	112.075	0.74	1397.66	53753	2.354	0.425	0.855
594	ARL13B_KAN508-14_6.tif:0008-0732	0.624	424.667	245	690	127.146	118.102	0.629	265.008	10192	3.333	0.3	0.889	0.226876				606	Ac-Tub_KAN508-14_6.tif:0008-0732	0.624	550.708	105	1180	127.146	118.102	0.629	343.663	13217	3.333	0.3	0.889
595	ARL13B_KAN508-14_6.tif:0009-0733	0.728	555.679	300	875	130.077	118.283	0.604	404.558	15559	3.3	0.303	0.8	0.346346				607	Ac-Tub_KAN508-14_6.tif:0009-0733	0.728	1338.43	376	3292	130.077	118.283	0.604	974.435	37476	3.3	0.303	0.8
596	ARL13B_KAN508-14_6.tif:0010-0864	0.416	396.625	301	519	97.617	139.38	0.74	165.006	6346	2.111	0.474	0.889	0.141263				608	Ac-Tub_KAN508-14_6.tif:0010-0864	0.416	307.062	6	646	97.617	139.38	0.74	127.746	4913	2.111	0.474	0.889
597	ARL13B_KAN508-14_6.tif:0011-0927	0.962	439.595	303	628	77.263	149.572	0.396	422.915	16265	5.575	0.179	0.698	0.362062				609	Ac-Tub_KAN508-14_6.tif:0011-0927	0.962	481.784	26	1883	77.263	149.572	0.396	463.504	17826	5.575	0.179	0.698
598	ARL13B_KAN508-14_6.tif:0012-1033	0.832	580.312	301	910	129.559	166.702	0.604	482.849	18570	3.304	0.303	0.771	0.413372				610	Ac-Tub_KAN508-14_6.tif:0012-1033	0.832	774.906	0	2532	129.559	166.702	0.604	644.761	24797	3.304	0.303	0.771
										48436.5				1.07821
611	ARL13B_KAN508-15_1.tif:0001-0032	1.456	660.714	306	1022	19.88	5.131	0.575	962.058	37000	3.257	0.307	0.818	0.823627				620	Ac-Tub_KAN508-15_1.tif:0001-0032	1.456	1254.27	0	2907	19.88	5.131	0.575	1826.32	70239	3.257	0.307	0.818
612	ARL13B_KAN508-15_1.tif:0002-0051	1.196	570.087	317	1047	155.214	8.077	0.572	681.865	26224	2.461	0.406	0.681	0.583751				621	Ac-Tub_KAN508-15_1.tif:0002-0051	1.196	970.196	0	2196	155.214	8.077	0.572	1160.42	44629	2.461	0.406	0.681
613	ARL13B_KAN508-15_1.tif:0003-0086	3.042	1032.22	4	2327	108.748	13.897	0.704	3140.21	120770	1.425	0.702	0.818	2.68836				622	Ac-Tub_KAN508-15_1.tif:0003-0086	3.042	966.735	41	2809	108.748	13.897	0.704	2940.99	113108	1.425	0.702	0.818
614	ARL13B_KAN508-15_1.tif:0004-0152	1.586	850.066	302	1700	64.361	24.495	0.431	1348.29	51854	4.982	0.201	0.722	1.15428				623	Ac-Tub_KAN508-15_1.tif:0004-0152	1.586	677.361	8	2835	64.361	24.495	0.431	1074.36	41319	4.982	0.201	0.722
615	ARL13B_KAN508-15_1.tif:0005-0298	0.78	582.433	314	1214	119.067	48.203	0.647	454.325	17473	2.692	0.371	0.789	0.388952				624	Ac-Tub_KAN508-15_1.tif:0005-0298	0.78	49.8	0	208	119.067	48.203	0.647	38.846	1494	2.692	0.371	0.789
616	ARL13B_KAN508-15_1.tif:0006-0767	0.884	457.294	312	686	65.814	123.783	0.404	404.272	15548	5.951	0.168	0.673	0.346102				625	Ac-Tub_KAN508-15_1.tif:0006-0767	0.884	1177.21	355	2109	65.814	123.783	0.404	1040.71	40025	5.951	0.168	0.673
617	ARL13B_KAN508-15_1.tif:0007-0843	1.716	654.924	301	1482	202.809	136.046	0.726	1123.92	43225	2.231	0.448	0.841	0.962197				626	Ac-Tub_KAN508-15_1.tif:0007-0843	1.716	453.682	19	1229	202.809	136.046	0.726	778.565	29943	2.231	0.448	0.841
618	ARL13B_KAN508-15_1.tif:0008-0966	0.806	420.742	304	582	147.832	155.801	0.283	339.138	13043	6.485	0.154	0.569	0.29034				627	Ac-Tub_KAN508-15_1.tif:0008-0966	0.806	385.355	0	1329	147.832	155.801	0.283	310.615	11946	6.485	0.154	0.569
619	ARL13B_KAN508-15_1.tif:0009-0992	1.898	761.082	305	1626	149.369	159.95	0.47	1444.62	55559	4.346	0.23	0.741	1.23675				628	Ac-Tub_KAN508-15_1.tif:0009-0992	1.898	621.658	0	1856	149.369	159.95	0.47	1179.98	45381	4.346	0.23	0.741
629	ARL13B_KAN508-15_2.tif:0001-0020	1.482	927.263	305	2333	138.889	3.161	0.449	1374.29	52854	5.067	0.197	0.735	1.17654				644	Ac-Tub_KAN508-15_2.tif:0001-0020	1.482	363.035	0	1805	138.889	3.161	0.449	538.05	20693	5.067	0.197	0.735
630	ARL13B_KAN508-15_2.tif:0002-0019	1.742	1321.42	307	2980	218.743	3.094	0.702	2302.05	88535	2.6	0.385	0.87	1.97081				645	Ac-Tub_KAN508-15_2.tif:0002-0019	1.742	482.522	0	1812	218.743	3.094	0.702	840.605	32329	2.6	0.385	0.87
631	ARL13B_KAN508-15_2.tif:0003-0204	1.118	730.395	308	1401	196.438	32.931	0.595	816.631	31407	3.253	0.307	0.827	0.699126				646	Ac-Tub_KAN508-15_2.tif:0003-0204	1.118	592.535	0	1909	196.438	32.931	0.595	662.494	25479	3.253	0.307	0.827
632	ARL13B_KAN508-15_2.tif:0004-0221	2.184	541.107	72	1332	71.236	35.688	0.3	1181.85	45453	3.661	0.273	0.517	1.01179				647	Ac-Tub_KAN508-15_2.tif:0004-0221	2.184	740.214	10	2381	71.236	35.688	0.3	1616.72	62178	3.661	0.273	0.517
633	ARL13B_KAN508-15_2.tif:0005-0300	1.612	1103.34	217	3402	133.458	48.287	0.646	1778.69	68407	2.961	0.338	0.879	1.52275				648	Ac-Tub_KAN508-15_2.tif:0005-0300	1.612	552.258	0	2695	133.458	48.287	0.646	890.294	34240	2.961	0.338	0.879
634	ARL13B_KAN508-15_2.tif:0006-0317	0.884	538.706	311	1123	196.374	50.993	0.614	476.245	18316	2.662	0.376	0.764	0.407718				649	Ac-Tub_KAN508-15_2.tif:0006-0317	0.884	227.235	2	1627	196.374	50.993	0.614	200.888	7726	2.662	0.376	0.764
635	ARL13B_KAN508-15_2.tif:0007-0414	0.806	467.935	303	799	185.346	66.797	0.439	377.179	14506	4.649	0.215	0.674	0.322906				650	Ac-Tub_KAN508-15_2.tif:0007-0414	0.806	557.323	0	2345	185.346	66.797	0.439	449.229	17277	4.649	0.215	0.674
636	ARL13B_KAN508-15_2.tif:0008-0482	1.612	831.774	300	1486	168.948	77.834	0.672	1340.9	51570	2.689	0.372	0.827	1.14796				651	Ac-Tub_KAN508-15_2.tif:0008-0482	1.612	494.274	0	2609	168.948	77.834	0.672	796.818	30645	2.689	0.372	0.827
637	ARL13B_KAN508-15_2.tif:0009-0527	1.924	789.189	307	1494	116.965	84.913	0.512	1518.49	58400	3.847	0.26	0.763	1.3				652	Ac-Tub_KAN508-15_2.tif:0009-0527	1.924	484.432	0	2712	116.965	84.913	0.512	932.104	35848	3.847	0.26	0.763
638	ARL13B_KAN508-15_2.tif:0010-0576	1.95	633.453	302	1146	54.278	92.857	0.435	1235.31	47509	4.88	0.205	0.725	1.05756				653	Ac-Tub_KAN508-15_2.tif:0010-0576	1.95	319.933	0	1326	54.278	92.857	0.435	623.908	23995	4.88	0.205	0.725
639	ARL13B_KAN508-15_2.tif:0011-0602	1.586	558.115	166	1111	20.536	96.997	0.353	885.223	34045	4.573	0.219	0.592	0.757848				654	Ac-Tub_KAN508-15_2.tif:0011-0602	1.586	278.475	17	630	20.536	96.997	0.353	441.689	16987	4.573	0.219	0.592
640	ARL13B_KAN508-15_2.tif:0012-0701	1.118	781.581	303	1354	196.603	113.083	0.49	873.861	33608	4.206	0.238	0.768	0.748121				655	Ac-Tub_KAN508-15_2.tif:0012-0701	1.118	199.814	0	735	196.603	113.083	0.49	223.405	8592	4.206	0.238	0.768
641	ARL13B_KAN508-15_2.tif:0013-0771	1.352	622.885	146	1409	188.334	124.206	0.457	842.191	32390	4.261	0.235	0.748	0.721008				656	Ac-Tub_KAN508-15_2.tif:0013-0771	1.352	241.673	0	1185	188.334	124.206	0.457	326.762	12567	4.261	0.235	0.748
642	ARL13B_KAN508-15_2.tif:0014-0942	1.976	749.263	98	2160	122.716	152.065	0.439	1480.63	56944	3.832	0.261	0.76	1.26758				657	Ac-Tub_KAN508-15_2.tif:0014-0942	1.976	250.605	0	1125	122.716	152.065	0.439	495.226	19046	3.832	0.261	0.76
643	ARL13B_KAN508-15_2.tif:0015-1031	1.43	566.291	302	882	3.584	166.282	0.596	809.845	31146	3.205	0.312	0.797	0.693316				658	Ac-Tub_KAN508-15_2.tif:0015-1031	1.43	295.891	14	759	3.584	166.282	0.596	423.149	16274	3.205	0.312	0.797
659	ARL13B_KAN508-15_3.tif:0001-0007	1.82	912.957	325	1851	195.668	1.053	0.781	1661.68	63907	2.022	0.494	0.927	1.42258				681	Ac-Tub_KAN508-15_3.tif:0001-0007	1.82	199.8	0	785	195.668	1.053	0.781	363.658	13986	2.022	0.494	0.927
660	ARL13B_KAN508-15_3.tif:0002-0027	0.494	361.263	301	443	60.957	4.299	0.543	178.475	6864	3.849	0.26	0.731	0.152794				682	Ac-Tub_KAN508-15_3.tif:0002-0027	0.494	621.632	190	951	60.957	4.299	0.543	307.104	11811	3.849	0.26	0.731
661	ARL13B_KAN508-15_3.tif:0003-0045	1.69	742.846	302	1354	86.32	7.401	0.497	1255.49	48285	3.929	0.255	0.743	1.07483				683	Ac-Tub_KAN508-15_3.tif:0003-0045	1.69	433.246	0	1144	86.32	7.401	0.497	732.23	28161	3.929	0.255	0.743
662	ARL13B_KAN508-15_3.tif:0004-0067	1.56	475.7	300	1083	37.085	10.876	0.476	742.137	28542	4.364	0.229	0.759	0.63535				684	Ac-Tub_KAN508-15_3.tif:0004-0067	1.56	245.8	51	493	37.085	10.876	0.476	383.471	14748	4.364	0.229	0.759
663	ARL13B_KAN508-15_3.tif:0005-0119	1.456	620.321	308	981	11.339	19.232	0.583	903.242	34738	3.61	0.277	0.875	0.773275				685	Ac-Tub_KAN508-15_3.tif:0005-0119	1.456	845.625	0	1746	11.339	19.232	0.583	1231.3	47355	3.61	0.277	0.875
664	ARL13B_KAN508-15_3.tif:0006-0167	2.392	744.228	202	1364	158.577	26.941	0.681	1780.3	68469	2.603	0.384	0.848	1.52413				686	Ac-Tub_KAN508-15_3.tif:0006-0167	2.392	867.283	0	2020	158.577	26.941	0.681	2074.66	79790	2.603	0.384	0.848
665	ARL13B_KAN508-15_3.tif:0007-0247	0.91	471.543	302	652	53.758	39.826	0.442	429.13	16504	4.313	0.232	0.753	0.367382				687	Ac-Tub_KAN508-15_3.tif:0007-0247	0.91	258.457	0	677	53.758	39.826	0.442	235.21	9046	4.313	0.232	0.753
666	ARL13B_KAN508-15_3.tif:0008-0259	1.014	587.564	307	858	23.197	41.844	0.539	595.826	22915	3.386	0.295	0.788	0.510092				688	Ac-Tub_KAN508-15_3.tif:0008-0259	1.014	934.333	83	1975	23.197	41.844	0.539	947.471	36439	3.386	0.295	0.788
667	ARL13B_KAN508-15_3.tif:0009-0278	2.262	329.172	53	707	183.4	44.862	0.543	744.633	28638	2.545	0.393	0.731	0.637487				689	Ac-Tub_KAN508-15_3.tif:0009-0278	2.262	603.195	0	1665	183.4	44.862	0.543	1364.51	52478	2.545	0.393	0.731
668	ARL13B_KAN508-15_3.tif:0010-0339	1.248	532.833	301	826	2.308	54.748	0.365	665.016	25576	5.499	0.182	0.744	0.569327				690	Ac-Tub_KAN508-15_3.tif:0010-0339	1.248	669.667	0	1355	2.308	54.748	0.365	835.794	32144	5.499	0.182	0.744
669	ARL13B_KAN508-15_3.tif:0011-0338	1.768	795.853	306	1575	90.625	54.538	0.536	1407.15	54118	3.909	0.256	0.76	1.20468				691	Ac-Tub_KAN508-15_3.tif:0011-0338	1.768	637.191	0	2461	90.625	54.538	0.536	1126.62	43329	3.909	0.256	0.76
670	ARL13B_KAN508-15_3.tif:0012-0382	2.626	742.446	224	2150	97.482	61.914	0.345	1949.78	74987	1.466	0.682	0.539	1.66923				692	Ac-Tub_KAN508-15_3.tif:0012-0382	2.626	375.545	0	1532	97.482	61.914	0.345	986.239	37930	1.466	0.682	0.539
671	ARL13B_KAN508-15_3.tif:0013-0409	1.248	805.917	301	1843	92.964	65.938	0.496	1005.85	38684	3.99	0.251	0.744	0.861113				693	Ac-Tub_KAN508-15_3.tif:0013-0409	1.248	367.958	0	2163	92.964	65.938	0.496	459.24	17662	3.99	0.251	0.744
672	ARL13B_KAN508-15_3.tif:0014-0440	1.898	528	306	1000	139.666	71.011	0.48	1002.2	38544	3.635	0.275	0.76	0.857997				694	Ac-Tub_KAN508-15_3.tif:0014-0440	1.898	534.932	0	1593	139.666	71.011	0.48	1015.36	39050	3.635	0.275	0.76
673	ARL13B_KAN508-15_3.tif:0015-0506	0.858	352.424	301	494	34.056	81.507	0.279	302.398	11630	5.387	0.186	0.504	0.258886				695	Ac-Tub_KAN508-15_3.tif:0015-0506	0.858	471.697	161	1203	34.056	81.507	0.279	404.74	15566	5.387	0.186	0.504
674	ARL13B_KAN508-15_3.tif:0016-0534	1.664	641.078	272	1380	159.501	86.216	0.658	1066.82	41029	2.682	0.373	0.865	0.913314				696	Ac-Tub_KAN508-15_3.tif:0016-0534	1.664	871.078	0	2664	159.501	86.216	0.658	1449.56	55749	2.682	0.373	0.865
675	ARL13B_KAN508-15_3.tif:0017-0637	1.586	1339.88	301	3631	88.855	102.614	0.799	2125.19	81733	1.188	0.842	0.865	1.81939				697	Ac-Tub_KAN508-15_3.tif:0017-0637	1.586	802.836	0	2901	88.855	102.614	0.799	1273.38	48973	1.188	0.842	0.865
676	ARL13B_KAN508-15_3.tif:0018-0672	1.04	473.55	301	738	122.526	108.352	0.446	492.522	18942	4.663	0.214	0.748	0.421653				698	Ac-Tub_KAN508-15_3.tif:0018-0672	1.04	943.75	246	1901	122.526	108.352	0.446	981.559	37750	4.663	0.214	0.748
677	ARL13B_KAN508-15_3.tif:0019-0807	2.054	781.57	303	2265	123.698	130.295	0.376	1605.44	61744	5.231	0.191	0.738	1.37443				699	Ac-Tub_KAN508-15_3.tif:0019-0807	2.054	669.354	0	3257	123.698	130.295	0.376	1374.94	52879	5.231	0.191	0.738
678	ARL13B_KAN508-15_3.tif:0020-0800	1.118	616.721	324	978	205.296	129.054	0.572	689.536	26519	3.708	0.27	0.843	0.590318				700	Ac-Tub_KAN508-15_3.tif:0020-0800	1.118	844	108	1928	205.296	129.054	0.572	943.649	36292	3.708	0.27	0.843
679	ARL13B_KAN508-15_3.tif:0021-0936	1.3	677.36	329	1155	79.374	150.936	0.641	880.621	33868	3.278	0.305	0.952	0.753908				701	Ac-Tub_KAN508-15_3.tif:0021-0936	1.3	644.86	116	1544	79.374	150.936	0.641	838.368	32243	3.278	0.305	0.952
680	ARL13B_KAN508-15_3.tif:0022-0968	1.482	726.982	285	1761	22.237	155.981	0.586	1077.45	41438	3.047	0.328	0.797	0.922418				702	Ac-Tub_KAN508-15_3.tif:0022-0968	1.482	515.789	0	1134	22.237	155.981	0.586	764.446	29400	3.047	0.328	0.797
703	ARL13B_KAN508-15_4.tif:0001-0017	1.924	467.257	209	800	123.511	2.741	0.421	899.056	34577	4.813	0.208	0.791	0.769691				722	Ac-Tub_KAN508-15_4.tif:0001-0017	1.924	582.081	0	1309	123.511	2.741	0.421	1119.99	43074	4.813	0.208	0.791
704	ARL13B_KAN508-15_4.tif:0002-0117	1.82	823.471	258	1553	57.573	18.79	0.509	1498.81	57643	4.073	0.246	0.814	1.28314				723	Ac-Tub_KAN508-15_4.tif:0002-0117	1.82	940.071	91	3137	57.573	18.79	0.509	1711.03	65805	4.073	0.246	0.814
705	ARL13B_KAN508-15_4.tif:0003-0234	1.482	488.474	111	1058	173.272	37.666	0.618	723.962	27843	2.968	0.337	0.844	0.619791				724	Ac-Tub_KAN508-15_4.tif:0003-0234	1.482	610.825	99	1332	173.272	37.666	0.618	905.297	34817	2.968	0.337	0.844
706	ARL13B_KAN508-15_4.tif:0004-0246	2.184	729.071	316	1318	80.091	39.762	0.562	1592.39	61242	3.524	0.284	0.778	1.36326				725	Ac-Tub_KAN508-15_4.tif:0004-0246	2.184	910.155	0	2491	80.091	39.762	0.562	1987.9	76453	3.524	0.284	0.778
707	ARL13B_KAN508-15_4.tif:0005-0246	1.43	660.509	303	1284	106.166	39.651	0.535	944.585	36328	4.456	0.224	0.791	0.808668				726	Ac-Tub_KAN508-15_4.tif:0005-0246	1.43	671.473	0	2642	106.166	39.651	0.535	960.264	36931	4.456	0.224	0.791
708	ARL13B_KAN508-15_4.tif:0006-0295	1.742	936.687	307	1821	218.957	47.512	0.55	1631.81	62758	3.285	0.304	0.749	1.39701				727	Ac-Tub_KAN508-15_4.tif:0006-0295	1.742	701.881	0	2016	218.957	47.512	0.55	1222.75	47026	3.285	0.304	0.749
709	ARL13B_KAN508-15_4.tif:0007-0294	0.572	388.773	309	531	39.814	47.437	0.768	222.391	8553	2.459	0.407	0.815	0.190391				728	Ac-Tub_KAN508-15_4.tif:0007-0294	0.572	576.045	113	1127	39.814	47.437	0.768	329.518	12673	2.459	0.407	0.815
710	ARL13B_KAN508-15_4.tif:0008-0349	1.378	842.717	248	2152	95.556	56.235	0.591	1161.33	44664	3.439	0.291	0.803	0.994229				729	Ac-Tub_KAN508-15_4.tif:0008-0349	1.378	1566.11	232	3339	95.556	56.235	0.591	2158.23	83004	3.439	0.291	0.803
711	ARL13B_KAN508-15_4.tif:0009-0393	1.196	430.935	263	625	28.475	63.406	0.397	515.429	19823	5.456	0.183	0.76	0.441264				730	Ac-Tub_KAN508-15_4.tif:0009-0393	1.196	760.913	141	2031	28.475	63.406	0.397	910.107	35002	5.456	0.183	0.76
712	ARL13B_KAN508-15_4.tif:0010-0395	1.768	853.235	130	2216	65.226	63.665	0.633	1508.61	58020	2.982	0.335	0.901	1.29154				731	Ac-Tub_KAN508-15_4.tif:0010-0395	1.768	972.324	56	2254	65.226	63.665	0.633	1719.17	66118	2.982	0.335	0.901
713	ARL13B_KAN508-15_4.tif:0011-0415	1.638	1305.83	316	3298	130.34	67.017	0.651	2139.07	82267	2.77	0.361	0.803	1.83128				732	Ac-Tub_KAN508-15_4.tif:0011-0415	1.638	1090.33	52	2683	130.34	67.017	0.651	1786.07	68691	2.77	0.361	0.803
714	ARL13B_KAN508-15_4.tif:0012-0564	1.664	685.234	305	1624	121.514	91.081	0.502	1140.3	43855	3.784	0.264	0.785	0.976221				733	Ac-Tub_KAN508-15_4.tif:0012-0564	1.664	1523.81	173	3131	121.514	91.081	0.502	2535.78	97524	3.784	0.264	0.785
715	ARL13B_KAN508-15_4.tif:0013-0596	0.65	492.16	309	926	88.987	96.07	0.627	319.923	12304	2.663	0.376	0.714	0.273889				734	Ac-Tub_KAN508-15_4.tif:0013-0596	0.65	1700.24	0	3089	88.987	96.07	0.627	1105.22	42506	2.663	0.376	0.714
716	ARL13B_KAN508-15_4.tif:0014-0605	1.43	549.527	302	855	5.727	97.546	0.605	785.871	30224	2.596	0.385	0.743	0.672792				735	Ac-Tub_KAN508-15_4.tif:0014-0605	1.43	762.418	74	1479	5.727	97.546	0.605	1090.32	41933	2.596	0.385	0.743
717	ARL13B_KAN508-15_4.tif:0015-0642	1.482	579.123	259	1231	134.201	103.47	0.339	858.312	33010	4.444	0.225	0.57	0.734809				736	Ac-Tub_KAN508-15_4.tif:0015-0642	1.482	489.842	0	1461	134.201	103.47	0.339	725.99	27921	4.444	0.225	0.57
718	ARL13B_KAN508-15_4.tif:0016-0732	1.118	488.442	300	812	57.366	118.071	0.416	546.111	21003	4.868	0.205	0.723	0.467531				737	Ac-Tub_KAN508-15_4.tif:0016-0732	1.118	357.605	0	1384	57.366	118.071	0.416	399.826	15377	4.868	0.205	0.723
719	ARL13B_KAN508-15_4.tif:0017-0758	1.716	573.288	306	936	146.493	122.135	0.615	983.821	37837	3.014	0.332	0.923	0.842259				738	Ac-Tub_KAN508-15_4.tif:0017-0758	1.716	480.47	0	1490	146.493	122.135	0.615	824.536	31711	3.014	0.332	0.923
720	ARL13B_KAN508-15_4.tif:0018-0852	0.598	396.261	311	501	70.645	137.522	0.46	236.978	9114	4.618	0.217	0.821	0.202879				739	Ac-Tub_KAN508-15_4.tif:0018-0852	0.598	907.957	215	1809	70.645	137.522	0.46	542.991	20883	4.618	0.217	0.821
721	ARL13B_KAN508-15_4.tif:0019-0897	1.248	539.208	326	1044	10.407	144.846	0.456	672.973	25882	3.58	0.279	0.686	0.576138				740	Ac-Tub_KAN508-15_4.tif:0019-0897	1.248	617.938	268	1077	10.407	144.846	0.456	771.232	29661	3.58	0.279	0.686
741	ARL13B_KAN508-15_5.tif:0001-0035	1.586	578.492	313	991	10.681	5.582	0.354	917.543	35288	6.092	0.164	0.678	0.785518				757	Ac-Tub_KAN508-15_5.tif:0001-0035	1.586	581.033	10	1062	10.681	5.582	0.354	921.573	35443	6.092	0.164	0.678
742	ARL13B_KAN508-15_5.tif:0002-0231	2.158	1147.67	209	3293	156.775	37.378	0.604	2476.83	95257	3.259	0.307	0.838	2.12044				758	Ac-Tub_KAN508-15_5.tif:0002-0231	2.158	951.819	0	3235	156.775	37.378	0.604	2054.15	79001	3.259	0.307	0.838
743	ARL13B_KAN508-15_5.tif:0003-0327	1.586	754.262	305	1460	79.178	52.741	0.787	1196.33	46010	2.246	0.445	0.871	1.02419				759	Ac-Tub_KAN508-15_5.tif:0003-0327	1.586	799.361	0	2029	79.178	52.741	0.787	1267.86	48761	2.246	0.445	0.871
744	ARL13B_KAN508-15_5.tif:0004-0379	0.936	483.528	304	791	64.576	61.145	0.498	452.609	17407	4.301	0.233	0.774	0.387483				760	Ac-Tub_KAN508-15_5.tif:0004-0379	0.936	639.611	51	2383	64.576	61.145	0.498	598.712	23026	4.301	0.233	0.774
745	ARL13B_KAN508-15_5.tif:0005-0463	1.534	887.644	302	1868	209.651	74.753	0.568	1361.73	52371	3.597	0.278	0.831	1.16579				761	Ac-Tub_KAN508-15_5.tif:0005-0463	1.534	708.898	0	2432	209.651	74.753	0.568	1087.52	41825	3.597	0.278	0.831
746	ARL13B_KAN508-15_5.tif:0006-0462	2.21	579.576	281	1015	106.155	74.354	0.474	1280.94	49264	4.026	0.248	0.733	1.09663				762	Ac-Tub_KAN508-15_5.tif:0006-0462	2.21	1169.6	0	2993	106.155	74.354	0.474	2584.97	99416	4.026	0.248	0.733
747	ARL13B_KAN508-15_5.tif:0007-0543	2.392	865.967	304	2113	137.301	87.524	0.464	2071.52	79669	3.979	0.251	0.739	1.77345				763	Ac-Tub_KAN508-15_5.tif:0007-0543	2.392	746.272	0	2935	137.301	87.524	0.464	1785.19	68657	3.979	0.251	0.739
748	ARL13B_KAN508-15_5.tif:0008-0540	0.988	540.395	287	954	25.995	87.173	0.517	533.942	20535	3.651	0.274	0.731	0.457113				764	Ac-Tub_KAN508-15_5.tif:0008-0540	0.988	344.947	21	1389	25.995	87.173	0.517	340.829	13108	3.651	0.274	0.731
749	ARL13B_KAN508-15_5.tif:0009-0676	0.676	361.808	289	426	52.319	108.955	0.646	244.597	9407	3.114	0.321	0.945	0.209402				765	Ac-Tub_KAN508-15_5.tif:0009-0676	0.676	890.615	423	1277	52.319	108.955	0.646	602.092	23156	3.114	0.321	0.945
750	ARL13B_KAN508-15_5.tif:0010-0736	1.3	665.12	243	1303	88.852	118.667	0.587	864.708	33256	3.255	0.307	0.8	0.740285				766	Ac-Tub_KAN508-15_5.tif:0010-0736	1.3	611.28	125	1150	88.852	118.667	0.587	794.712	30564	3.255	0.307	0.8
751	ARL13B_KAN508-15_5.tif:0011-0833	0.598	548.913	305	1072	109.422	134.283	0.712	328.27	12625	2.527	0.396	0.793	0.281035				767	Ac-Tub_KAN508-15_5.tif:0011-0833	0.598	746.087	10	2038	109.422	134.283	0.712	446.187	17160	2.527	0.396	0.793
752	ARL13B_KAN508-15_5.tif:0012-0837	1.3	415.84	39	789	177.501	135.002	0.451	540.625	20792	5.081	0.197	0.87	0.462834				768	Ac-Tub_KAN508-15_5.tif:0012-0837	1.3	804.5	118	1727	177.501	135.002	0.451	1045.91	40225	5.081	0.197	0.87
753	ARL13B_KAN508-15_5.tif:0013-0871	0.858	577.636	310	949	176.185	140.534	0.647	495.642	19062	3.093	0.323	0.868	0.424324				769	Ac-Tub_KAN508-15_5.tif:0013-0871	0.858	416.424	0	1108	176.185	140.534	0.647	357.314	13742	3.093	0.323	0.868
754	ARL13B_KAN508-15_5.tif:0014-0884	1.482	1337.47	311	2898	70.799	142.611	0.708	1982.26	76236	2.208	0.453	0.82	1.69703				770	Ac-Tub_KAN508-15_5.tif:0014-0884	1.482	750.474	26	1855	70.799	142.611	0.708	1112.27	42777	2.208	0.453	0.82
755	ARL13B_KAN508-15_5.tif:0015-0948	0.65	342.4	300	430	206.552	152.926	0.377	222.573	8560	5.755	0.174	0.649	0.190547				771	Ac-Tub_KAN508-15_5.tif:0015-0948	0.65	446.72	122	903	206.552	152.926	0.377	290.385	11168	5.755	0.174	0.649
756	ARL13B_KAN508-15_5.tif:0016-1025	0.962	486.757	308	702	176.815	165.249	0.351	468.288	18010	6.052	0.165	0.655	0.400906				772	Ac-Tub_KAN508-15_5.tif:0016-1025	0.962	514.081	18	966	176.815	165.249	0.351	494.576	19021	6.052	0.165	0.655
773	ARL13B_KAN508-15_6.tif:0001-0066	2.496	874.688	218	1921	186.644	10.579	0.418	2183.35	83970	4.252	0.235	0.662	1.86919				785	Ac-Tub_KAN508-15_6.tif:0001-0066	2.496	829.167	34	2885	186.644	10.579	0.418	2069.72	79600	4.252	0.235	0.662
774	ARL13B_KAN508-15_6.tif:0002-0162	2.002	792.558	300	1648	119.286	26.077	0.442	1586.8	61027	4.788	0.209	0.766	1.35847				786	Ac-Tub_KAN508-15_6.tif:0002-0162	2.002	672.273	4	2353	119.286	26.077	0.442	1345.97	51765	4.788	0.209	0.766
775	ARL13B_KAN508-15_6.tif:0003-0271	1.274	491.633	127	871	201.587	43.809	0.4	626.378	24090	4.172	0.24	0.641	0.536248				787	Ac-Tub_KAN508-15_6.tif:0003-0271	1.274	173.265	0	565	201.587	43.809	0.4	220.753	8490	4.172	0.24	0.641
776	ARL13B_KAN508-15_6.tif:0004-0303	0.754	413	301	627	135.62	49.023	0.533	311.421	11977	3.707	0.27	0.773	0.26661				788	Ac-Tub_KAN508-15_6.tif:0004-0303	0.754	863.276	67	2191	135.62	49.023	0.533	650.949	25035	3.707	0.27	0.773
777	ARL13B_KAN508-15_6.tif:0005-0361	2.678	555.748	309	1141	194.666	58.207	0.775	1488.38	57242	2.081	0.481	0.877	1.27422				789	Ac-Tub_KAN508-15_6.tif:0005-0361	2.678	275.699	0	570	194.666	58.207	0.775	738.366	28397	2.081	0.481	0.877
778	ARL13B_KAN508-15_6.tif:0006-0480	1.794	799.232	313	1638	131.502	77.413	0.599	1433.91	55147	3.102	0.322	0.802	1.22758				790	Ac-Tub_KAN508-15_6.tif:0006-0480	1.794	840.87	0	3082	131.502	77.413	0.599	1508.61	58020	3.102	0.322	0.802
779	ARL13B_KAN508-15_6.tif:0007-0482	1.508	539.431	301	829	61.278	77.661	0.351	813.511	31287	5.722	0.175	0.663	0.696455				791	Ac-Tub_KAN508-15_6.tif:0007-0482	1.508	633.121	154	2000	61.278	77.661	0.351	954.803	36721	5.722	0.175	0.663
780	ARL13B_KAN508-15_6.tif:0008-0569	1.014	446.308	306	750	85.316	91.737	0.319	452.583	17406	5.797	0.173	0.645	0.387461				792	Ac-Tub_KAN508-15_6.tif:0008-0569	1.014	1041.41	12	2770	85.316	91.737	0.319	1056.05	40615	5.797	0.173	0.645
781	ARL13B_KAN508-15_6.tif:0009-0755	1.716	698.015	213	1376	206.639	121.827	0.454	1197.87	46069	4.911	0.204	0.835	1.0255				793	Ac-Tub_KAN508-15_6.tif:0009-0755	1.716	422.303	0	2447	206.639	121.827	0.454	724.716	27872	4.911	0.204	0.835
782	ARL13B_KAN508-15_6.tif:0010-0800	0.494	353	300	456	116.342	129.132	0.526	174.393	6707	3.022	0.331	0.731	0.149299				794	Ac-Tub_KAN508-15_6.tif:0010-0800	0.494	237.579	3	702	116.342	129.132	0.526	117.371	4514	3.022	0.331	0.731
783	ARL13B_KAN508-15_6.tif:0011-0839	1.404	619.019	326	951	15.113	135.417	0.436	869.154	33427	4.379	0.228	0.679	0.744092				795	Ac-Tub_KAN508-15_6.tif:0011-0839	1.404	926.556	273	2060	15.113	135.417	0.436	1300.96	50034	4.379	0.228	0.679
784	ARL13B_KAN508-15_6.tif:0012-1018	1.378	629.075	308	983	154.169	164.084	0.513	866.918	33341	3.939	0.254	0.774	0.742177				796	Ac-Tub_KAN508-15_6.tif:0012-1018	1.378	693.491	57	1985	154.169	164.084	0.513	955.688	36755	3.939	0.254	0.774
										39525.2				0.879839
797	ARL13B_KAN508-16_1.tif:0001-0261	1.326	400.157	300	530	65.26	42.126	0.59	530.64	20408	3.219	0.311	0.823	0.454286				802	Ac-Tub_KAN508-16_1.tif:0001-0261	1.326	753.98	36	1570	65.26	42.126	0.59	999.838	38453	3.219	0.311	0.823
798	ARL13B_KAN508-16_1.tif:0002-0333	0.676	429.731	302	618	109.011	53.858	0.524	290.515	11173	3.24	0.309	0.693	0.248713				803	Ac-Tub_KAN508-16_1.tif:0002-0333	0.676	1313.35	295	2875	109.011	53.858	0.524	887.875	34147	3.24	0.309	0.693
799	ARL13B_KAN508-16_1.tif:0003-0592	1.118	510.837	302	831	65.837	95.454	0.43	571.15	21966	5.017	0.199	0.711	0.488967				804	Ac-Tub_KAN508-16_1.tif:0003-0592	1.118	651.488	145	1354	65.837	95.454	0.43	728.408	28014	5.017	0.199	0.711
800	ARL13B_KAN508-16_1.tif:0004-0667	2.054	856.734	119	1867	175.357	107.428	0.686	1759.84	67682	1.664	0.601	0.775	1.50661				805	Ac-Tub_KAN508-16_1.tif:0004-0667	2.054	348.025	0	1648	175.357	107.428	0.686	714.887	27494	1.664	0.601	0.775
801	ARL13B_KAN508-16_1.tif:0005-0950	0.754	421.69	315	568	82.04	153.04	0.321	317.973	12229	6.581	0.152	0.558	0.27222				806	Ac-Tub_KAN508-16_1.tif:0005-0950	0.754	834.483	163	1985	82.04	153.04	0.321	629.238	24200	6.581	0.152	0.558
807	ARL13B_KAN508-16_2.tif:0001-0016	0.832	695.812	300	1306	164.677	2.54	0.567	578.951	22266	3.987	0.251	0.762	0.495646				820	Ac-Tub_KAN508-16_2.tif:0001-0016	0.832	277.781	0	1066	164.677	2.54	0.567	231.128	8889	3.987	0.251	0.762
808	ARL13B_KAN508-16_2.tif:0002-0129	0.91	551.343	320	1039	130.223	20.767	0.387	501.752	19297	6.033	0.166	0.68	0.429555				821	Ac-Tub_KAN508-16_2.tif:0002-0129	0.91	522.029	78	2069	130.223	20.767	0.387	475.075	18271	6.033	0.166	0.68
809	ARL13B_KAN508-16_2.tif:0003-0138	1.638	584.667	109	1393	37.621	22.169	0.472	957.742	36834	3.675	0.272	0.681	0.819932				822	Ac-Tub_KAN508-16_2.tif:0003-0138	1.638	270.873	0	1668	37.621	22.169	0.472	443.717	17065	3.675	0.272	0.681
810	ARL13B_KAN508-16_2.tif:0004-0268	1.066	775.854	309	1361	205.726	43.213	0.521	827.11	31810	4.242	0.236	0.774	0.708097				823	Ac-Tub_KAN508-16_2.tif:0004-0268	1.066	421.488	3	1794	205.726	43.213	0.521	449.333	17281	4.242	0.236	0.774
811	ARL13B_KAN508-16_2.tif:0005-0330	4.004	1781.23	302	3659	185.162	53.292	0.466	7132.49	274310	2.677	0.374	0.705	6.10619				824	Ac-Tub_KAN508-16_2.tif:0005-0330	4.004	1390.23	0	2830	185.162	53.292	0.466	5566.81	214095	2.677	0.374	0.705
812	ARL13B_KAN508-16_2.tif:0006-0347	0.468	364.889	305	474	96.41	56.016	0.487	170.778	6568	4.337	0.231	0.667	0.146205				825	Ac-Tub_KAN508-16_2.tif:0006-0347	0.468	526.833	88	1006	96.41	56.016	0.487	246.573	9483	4.337	0.231	0.667
813	ARL13B_KAN508-16_2.tif:0007-0512	1.638	493.81	245	913	64.44	82.551	0.429	808.909	31110	4.448	0.225	0.773	0.692515				826	Ac-Tub_KAN508-16_2.tif:0007-0512	1.638	797.238	98	1970	64.44	82.551	0.429	1305.95	50226	4.448	0.225	0.773
814	ARL13B_KAN508-16_2.tif:0008-0541	1.768	1021.07	301	2231	124.777	87.246	0.483	1805.37	69433	3.752	0.266	0.731	1.54559				827	Ac-Tub_KAN508-16_2.tif:0008-0541	1.768	868.868	0	3315	124.777	87.246	0.483	1536.25	59083	3.752	0.266	0.731
815	ARL13B_KAN508-16_2.tif:0009-0777	1.014	722.564	310	1340	74.822	125.393	0.736	732.724	28180	2.21	0.452	0.796	0.627292				828	Ac-Tub_KAN508-16_2.tif:0009-0777	1.014	1123.82	244	2251	74.822	125.393	0.736	1139.62	43829	2.21	0.452	0.796
816	ARL13B_KAN508-16_2.tif:0010-0901	2.314	627.798	313	1536	182.77	145.264	0.462	1452.81	55874	4.446	0.225	0.767	1.24377				829	Ac-Tub_KAN508-16_2.tif:0010-0901	2.314	762.618	10	2746	182.77	145.264	0.462	1764.8	67873	4.446	0.225	0.767
817	ARL13B_KAN508-16_2.tif:0011-0912	2.34	884.667	320	1724	14.561	147.098	0.577	2070.24	79620	3.327	0.301	0.811	1.77236				830	Ac-Tub_KAN508-16_2.tif:0011-0912	2.34	583.489	0	1603	14.561	147.098	0.577	1365.45	52514	3.327	0.301	0.811
818	ARL13B_KAN508-16_2.tif:0012-0964	0.936	435.167	296	679	99.567	155.508	0.346	407.341	15666	6.184	0.162	0.673	0.348728				831	Ac-Tub_KAN508-16_2.tif:0012-0964	0.936	1484.81	696	2468	99.567	155.508	0.346	1389.86	53453	6.184	0.162	0.673
819	ARL13B_KAN508-16_2.tif:0013-1030	1.014	685.179	194	1943	198.832	166.247	0.539	694.814	26722	2.172	0.46	0.716	0.594837				832	Ac-Tub_KAN508-16_2.tif:0013-1030	1.014	360.872	21	1728	198.832	166.247	0.539	365.946	14074	2.172	0.46	0.716
833	ARL13B_KAN508-16_3.tif:0001-0036	0.728	659.571	319	1116	138.6	5.788	0.496	480.197	18468	4.075	0.245	0.691	0.411101				844	Ac-Tub_KAN508-16_3.tif:0001-0036	0.728	86.429	0	279	138.6	5.788	0.496	62.924	2420	4.075	0.245	0.691
834	ARL13B_KAN508-16_3.tif:0002-0148	0.78	492.7	311	902	104.033	23.956	0.349	384.329	14781	6.517	0.153	0.659	0.329028				845	Ac-Tub_KAN508-16_3.tif:0002-0148	0.78	134.3	19	336	104.033	23.956	0.349	104.76	4029	6.517	0.153	0.659
835	ARL13B_KAN508-16_3.tif:0003-0158	1.248	496.875	149	1014	11.513	25.504	0.392	620.137	23850	4.482	0.223	0.596	0.530906				846	Ac-Tub_KAN508-16_3.tif:0003-0158	1.248	148.875	0	703	11.513	25.504	0.392	185.807	7146	4.482	0.223	0.596
836	ARL13B_KAN508-16_3.tif:0004-0171	1.196	505.304	315	820	211.718	27.644	0.454	604.38	23244	4.85	0.206	0.681	0.517416				847	Ac-Tub_KAN508-16_3.tif:0004-0171	1.196	758.565	112	2153	211.718	27.644	0.454	907.299	34894	4.85	0.206	0.681
837	ARL13B_KAN508-16_3.tif:0005-0288	1.092	735.571	318	1236	179.598	46.44	0.533	803.292	30894	4.131	0.242	0.792	0.687706				848	Ac-Tub_KAN508-16_3.tif:0005-0288	1.092	75.548	0	365	179.598	46.44	0.533	82.503	3173	4.131	0.242	0.792
838	ARL13B_KAN508-16_3.tif:0006-0350	3.978	1683.88	317	3657	159.047	56.505	0.463	6698.86	257633	2.782	0.36	0.71	5.73496				849	Ac-Tub_KAN508-16_3.tif:0006-0350	3.978	1138.01	0	2900	159.047	56.505	0.463	4527.29	174116	2.782	0.36	0.71
839	ARL13B_KAN508-16_3.tif:0007-0532	1.586	518.098	219	873	38.326	85.792	0.415	821.753	31604	4.526	0.221	0.767	0.703511				850	Ac-Tub_KAN508-16_3.tif:0007-0532	1.586	404.77	0	1924	38.326	85.792	0.415	642.005	24691	4.526	0.221	0.767
840	ARL13B_KAN508-16_3.tif:0008-0562	1.768	857.324	306	1813	98.664	90.504	0.518	1515.84	58298	3.615	0.277	0.76	1.29772				851	Ac-Tub_KAN508-16_3.tif:0008-0562	1.768	246.544	0	1593	98.664	90.504	0.518	435.916	16765	3.615	0.277	0.76
841	ARL13B_KAN508-16_3.tif:0009-0797	0.858	709.394	325	1220	48.744	128.602	0.623	608.697	23410	2.568	0.389	0.733	0.521111				852	Ac-Tub_KAN508-16_3.tif:0009-0797	0.858	778.909	149	2315	48.744	128.602	0.623	668.344	25704	2.568	0.389	0.733
842	ARL13B_KAN508-16_3.tif:0010-0922	2.132	548.927	302	1270	156.7	148.69	0.467	1170.38	45012	4.317	0.232	0.788	1.00198				853	Ac-Tub_KAN508-16_3.tif:0010-0922	2.132	380.22	0	2215	156.7	148.69	0.467	810.677	31178	4.317	0.232	0.788
843	ARL13B_KAN508-16_3.tif:0011-0983	0.52	386.9	258	563	73.973	158.622	0.524	201.2	7738	3.046	0.328	0.8	0.172249				854	Ac-Tub_KAN508-16_3.tif:0011-0983	0.52	1382	261	2035	73.973	158.622	0.524	718.683	27640	3.046	0.328	0.8
855	ARL13B_KAN508-16_4.tif:0001-0189	1.326	435.157	300	725	24.028	30.538	0.615	577.053	22193	3.38	0.296	0.816	0.494021				860	Ac-Tub_KAN508-16_4.tif:0001-0189	1.326	610.843	184	1445	24.028	30.538	0.615	810.027	31153	3.38	0.296	0.816
856	ARL13B_KAN508-16_4.tif:0002-0463	1.248	588.729	126	1167	146.291	74.605	0.762	734.778	28259	2.178	0.459	0.923	0.629051				861	Ac-Tub_KAN508-16_4.tif:0002-0463	1.248	304.083	0	1107	146.291	74.605	0.762	379.519	14596	2.178	0.459	0.923
857	ARL13B_KAN508-16_4.tif:0003-0494	0.754	484.931	302	692	16.595	79.755	0.657	365.66	14063	3.146	0.318	0.795	0.313045				862	Ac-Tub_KAN508-16_4.tif:0003-0494	0.754	897.862	21	1792	16.595	79.755	0.657	677.029	26038	3.146	0.318	0.795
858	ARL13B_KAN508-16_4.tif:0004-0612	1.222	478.915	308	836	191.224	98.762	0.51	585.269	22509	3.701	0.27	0.707	0.501055				863	Ac-Tub_KAN508-16_4.tif:0004-0612	1.222	731.915	0	1768	191.224	98.762	0.51	894.454	34400	3.701	0.27	0.707
859	ARL13B_KAN508-16_4.tif:0005-0721	1.508	730.293	300	1836	142.531	116.336	0.62	1101.35	42357	3.152	0.317	0.829	0.942875				864	Ac-Tub_KAN508-16_4.tif:0005-0721	1.508	494.914	0	1176	142.531	116.336	0.62	746.375	28705	3.152	0.317	0.829
865	ARL13B_KAN508-16_5.tif:0001-0004	0.416	1056.69	332	2360	63.24	0.695	0.69	439.608	16907	2.269	0.441	0.889	0.376353				869	Ac-Tub_KAN508-16_5.tif:0001-0004	0.416	522.75	0	1241	63.24	0.695	0.69	217.477	8364	2.269	0.441	0.889
866	ARL13B_KAN508-16_5.tif:0002-0030	2.236	1433.69	304	3842	155.134	4.86	0.591	3205.91	123297	3.506	0.285	0.823	2.74462				870	Ac-Tub_KAN508-16_5.tif:0002-0030	2.236	416.628	0	2424	155.134	4.86	0.591	931.636	35830	3.506	0.285	0.823
867	ARL13B_KAN508-16_5.tif:0003-0345	1.404	547.185	302	974	124.521	55.631	0.752	768.294	29548	2.528	0.396	0.871	0.657744				871	Ac-Tub_KAN508-16_5.tif:0003-0345	1.404	641.537	51	1554	124.521	55.631	0.752	900.772	34643	2.528	0.396	0.871
868	ARL13B_KAN508-16_5.tif:0004-0516	2.08	1194.58	302	3641	210.518	83.27	0.726	2484.87	95566	1.968	0.508	0.838	2.12732				872	Ac-Tub_KAN508-16_5.tif:0004-0516	2.08	698.263	0	3577	210.518	83.27	0.726	1452.47	55861	1.968	0.508	0.838
873	ARL13B_KAN508-16_6.tif:0001-0032	1.716	1124.23	300	2291	104.793	5.077	0.517	1929.29	74199	3.56	0.281	0.795	1.65168				881	Ac-Tub_KAN508-16_6.tif:0001-0032	1.716	943.667	0	2624	104.793	5.077	0.517	1619.43	62282	3.56	0.281	0.795
874	ARL13B_KAN508-16_6.tif:0002-0116	0.754	374.138	302	504	42.117	18.797	0.26	282.117	10850	7.722	0.129	0.592	0.241523				882	Ac-Tub_KAN508-16_6.tif:0002-0116	0.754	272.138	61	575	42.117	18.797	0.26	205.204	7892	7.722	0.129	0.592
875	ARL13B_KAN508-16_6.tif:0003-0200	1.144	583.182	269	1055	148.955	32.316	0.774	667.2	25660	2.201	0.454	0.898	0.571197				883	Ac-Tub_KAN508-16_6.tif:0003-0200	1.144	914.818	68	3082	148.955	32.316	0.774	1046.62	40252	2.201	0.454	0.898
876	ARL13B_KAN508-16_6.tif:0004-0326	2.73	1045.31	0	3706	196.382	52.432	0.513	2853.88	109758	2.979	0.336	0.837	2.44323				884	Ac-Tub_KAN508-16_6.tif:0004-0326	2.73	738.724	0	2207	196.382	52.432	0.513	2016.84	77566	2.979	0.336	0.837
877	ARL13B_KAN508-16_6.tif:0005-0415	0.494	579.474	328	976	157.291	66.982	0.681	286.277	11010	2.794	0.358	0.776	0.245085				885	Ac-Tub_KAN508-16_6.tif:0005-0415	0.494	6.684	0	25	157.291	66.982	0.681	3.302	127	2.794	0.358	0.776
878	ARL13B_KAN508-16_6.tif:0006-0630	0.39	343.733	244	434	65.107	101.722	0.552	134.064	5156	3.405	0.294	0.769	0.114774				886	Ac-Tub_KAN508-16_6.tif:0006-0630	0.39	550.8	7	1192	65.107	101.722	0.552	214.825	8262	3.405	0.294	0.769
879	ARL13B_KAN508-16_6.tif:0007-0926	3.64	530.114	0	1476	211.018	149.679	0.408	1929.73	74216	1.145	0.874	0.636	1.65206				887	Ac-Tub_KAN508-16_6.tif:0007-0926	3.64	443.564	0	1418	211.018	149.679	0.408	1614.67	62099	1.145	0.874	0.636
880	ARL13B_KAN508-16_6.tif:0008-0989	1.456	587.107	308	905	108.593	159.39	0.458	854.879	32878	4.377	0.228	0.737	0.731871				888	Ac-Tub_KAN508-16_6.tif:0008-0989	1.456	683.5	117	1695	108.593	159.39	0.458	995.236	38276	4.377	0.228	0.737
										45750.1				1.01841
889	ARL13B_KAN508-17_1.tif:0001-0365	1.638	755.238	301	1367	128.63	58.924	0.582	1237.15	47580	3.099	0.323	0.768	1.05914				891	Ac-Tub_KAN508-17_1.tif:0001-0365	1.638	1649.62	1	3311	128.63	58.924	0.582	2702.24	103926	3.099	0.323	0.768
890	ARL13B_KAN508-17_1.tif:0002-0848	0.936	649.944	301	1029	211.815	136.785	0.571	608.385	23398	3.551	0.282	0.818	0.520844				892	Ac-Tub_KAN508-17_1.tif:0002-0848	0.936	511.111	0	1619	211.815	136.785	0.571	478.429	18400	3.551	0.282	0.818
893	ARL13B_KAN508-17_2.tif:0001-0211	1.3	728.5	306	1305	28.264	34.133	0.409	947.107	36425	5.247	0.191	0.746	0.810828				908	Ac-Tub_KAN508-17_2.tif:0001-0211	1.3	394.76	0	1994	28.264	34.133	0.409	513.219	19738	5.247	0.191	0.746
894	ARL13B_KAN508-17_2.tif:0002-0288	1.638	566.667	152	1117	50.969	46.638	0.417	928.256	35700	4.881	0.205	0.84	0.794689				909	Ac-Tub_KAN508-17_2.tif:0002-0288	1.638	1313.73	0	3281	50.969	46.638	0.417	2152.02	82765	4.881	0.205	0.84
895	ARL13B_KAN508-17_2.tif:0003-0292	0.338	364.385	303	500	47.86	47.104	0.719	123.169	4737	2.691	0.372	0.839	0.105447				910	Ac-Tub_KAN508-17_2.tif:0003-0292	0.338	282.385	105	717	47.86	47.104	0.719	95.452	3671	2.691	0.372	0.839
896	ARL13B_KAN508-17_2.tif:0004-0449	1.17	790.289	300	2096	167.161	72.41	0.69	924.694	35563	2.217	0.451	0.783	0.791639				911	Ac-Tub_KAN508-17_2.tif:0004-0449	1.17	854.844	0	2993	167.161	72.41	0.69	1000.23	38468	2.217	0.451	0.783
897	ARL13B_KAN508-17_2.tif:0005-0468	1.196	659.174	215	1328	58.365	75.465	0.795	788.419	30322	1.969	0.508	0.836	0.674974				912	Ac-Tub_KAN508-17_2.tif:0005-0468	1.196	481.543	43	1280	58.365	75.465	0.795	575.961	22151	1.969	0.508	0.836
898	ARL13B_KAN508-17_2.tif:0006-0495	0.65	340.2	303	383	221.761	79.809	0.494	221.143	8505	3.868	0.259	0.725	0.189323				913	Ac-Tub_KAN508-17_2.tif:0006-0495	0.65	505.12	123	1041	221.761	79.809	0.494	328.348	12628	3.868	0.259	0.725
899	ARL13B_KAN508-17_2.tif:0007-0519	1.482	603.07	301	1132	107.841	83.653	0.495	893.804	34375	3.723	0.269	0.713	0.765194				914	Ac-Tub_KAN508-17_2.tif:0007-0519	1.482	995.456	0	2804	107.841	83.653	0.495	1475.36	56741	3.723	0.269	0.713
900	ARL13B_KAN508-17_2.tif:0008-0521	1.274	806.755	303	1824	8.946	83.842	0.42	1027.87	39531	4.471	0.224	0.69	0.879968				915	Ac-Tub_KAN508-17_2.tif:0008-0521	1.274	382.163	42	1301	8.946	83.842	0.42	486.905	18726	4.471	0.224	0.69
901	ARL13B_KAN508-17_2.tif:0009-0578	1.612	1104.79	301	2289	152.722	93.325	0.581	1781.03	68497	3.114	0.321	0.775	1.52476				916	Ac-Tub_KAN508-17_2.tif:0009-0578	1.612	394.129	14	1234	152.722	93.325	0.581	635.374	24436	3.114	0.321	0.775
902	ARL13B_KAN508-17_2.tif:0010-0602	1.95	797.467	302	1759	115.28	97.108	0.564	1555.15	59810	3.542	0.282	0.829	1.33138				917	Ac-Tub_KAN508-17_2.tif:0010-0602	1.95	1075.03	0	2923	115.28	97.108	0.564	2096.43	80627	3.542	0.282	0.829
903	ARL13B_KAN508-17_2.tif:0011-0606	1.586	769.279	306	1411	155.084	97.769	0.501	1220.15	46926	4.054	0.247	0.777	1.04458				918	Ac-Tub_KAN508-17_2.tif:0011-0606	1.586	838.377	106	2298	155.084	97.769	0.501	1329.75	51141	4.054	0.247	0.777
904	ARL13B_KAN508-17_2.tif:0012-0628	1.768	887.5	307	1783	153.38	101.312	0.483	1569.19	60350	4.148	0.241	0.8	1.3434				919	Ac-Tub_KAN508-17_2.tif:0012-0628	1.768	336	0	1557	153.38	101.312	0.483	594.084	22848	4.148	0.241	0.8
905	ARL13B_KAN508-17_2.tif:0013-0693	1.586	812.541	315	2092	23.729	111.798	0.507	1288.77	49565	3.635	0.275	0.772	1.10333				920	Ac-Tub_KAN508-17_2.tif:0013-0693	1.586	934.738	42	3186	23.729	111.798	0.507	1482.58	57019	3.635	0.275	0.772
906	ARL13B_KAN508-17_2.tif:0014-0867	1.118	404.023	300	551	68.814	139.798	0.73	451.725	17373	2.695	0.371	0.835	0.386726				921	Ac-Tub_KAN508-17_2.tif:0014-0867	1.118	186.86	19	510	68.814	139.798	0.73	208.923	8035	2.695	0.371	0.835
907	ARL13B_KAN508-17_2.tif:0015-0939	1.69	692.508	313	1505	41.442	151.611	0.418	1170.41	45013	5.388	0.186	0.756	1.002				922	Ac-Tub_KAN508-17_2.tif:0015-0939	1.69	841.985	95	2336	41.442	151.611	0.418	1423.04	54729	5.388	0.186	0.756
923	ARL13B_KAN508-17_3.tif:0001-0022	1.3	608.42	34	2380	103.523	3.622	0.312	790.994	30421	2.968	0.337	0.51	0.677177				939	Ac-Tub_KAN508-17_3.tif:0001-0022	1.3	50.3	0	345	103.523	3.622	0.312	65.394	2515	2.968	0.337	0.51
924	ARL13B_KAN508-17_3.tif:0002-0172	1.56	688.783	307	1293	29.388	27.754	0.343	1074.57	41327	6.213	0.161	0.698	0.919947				940	Ac-Tub_KAN508-17_3.tif:0002-0172	1.56	367.5	0	1643	29.388	27.754	0.343	573.335	22050	6.213	0.161	0.698
925	ARL13B_KAN508-17_3.tif:0003-0243	1.898	754.493	305	1416	156.99	39.247	0.626	1432.11	55078	2.836	0.353	0.82	1.22605				941	Ac-Tub_KAN508-17_3.tif:0003-0243	1.898	252.137	0	1502	156.99	39.247	0.626	478.585	18406	2.836	0.353	0.82
926	ARL13B_KAN508-17_3.tif:0004-0300	0.39	408.4	314	483	106.764	48.423	0.552	159.286	6126	3.048	0.328	0.769	0.136366				942	Ac-Tub_KAN508-17_3.tif:0004-0300	0.39	444.667	22	1251	106.764	48.423	0.552	173.43	6670	3.048	0.328	0.769
927	ARL13B_KAN508-17_3.tif:0005-0318	1.092	1342.62	309	3591	53.593	51.324	0.793	1466.23	56390	1.797	0.556	0.808	1.25525				943	Ac-Tub_KAN508-17_3.tif:0005-0318	1.092	646.214	0	3038	53.593	51.324	0.793	705.708	27141	1.797	0.556	0.808
928	ARL13B_KAN508-17_3.tif:0006-0333	0.468	401.778	306	501	212.456	53.768	0.34	188.043	7232	5.642	0.177	0.61	0.160986				944	Ac-Tub_KAN508-17_3.tif:0006-0333	0.468	31.556	0	120	212.456	53.768	0.34	14.769	568	5.642	0.177	0.61
929	ARL13B_KAN508-17_3.tif:0007-0345	1.82	655.371	6	1556	88.837	55.62	0.484	1192.85	45876	1.804	0.554	0.664	1.02121				945	Ac-Tub_KAN508-17_3.tif:0007-0345	1.82	680.414	0	2463	88.837	55.62	0.484	1238.43	47629	1.804	0.554	0.664
930	ARL13B_KAN508-17_3.tif:0008-0367	1.768	615.074	300	1013	127.186	59.165	0.68	1087.52	41825	2.709	0.369	0.84	0.931033				946	Ac-Tub_KAN508-17_3.tif:0008-0367	1.768	367.235	0	1270	127.186	59.165	0.68	649.311	24972	2.709	0.369	0.84
931	ARL13B_KAN508-17_3.tif:0009-0473	2.392	900.13	313	2221	176.169	76.203	0.425	2153.24	82812	4.173	0.24	0.694	1.84341				947	Ac-Tub_KAN508-17_3.tif:0009-0473	2.392	162.272	0	722	176.169	76.203	0.425	388.177	14929	4.173	0.24	0.694
932	ARL13B_KAN508-17_3.tif:0010-0566	1.274	564.347	300	891	53.642	91.299	0.596	719.021	27653	2.7	0.37	0.803	0.615561				948	Ac-Tub_KAN508-17_3.tif:0010-0566	1.274	407.673	0	1113	53.642	91.299	0.596	519.407	19976	2.7	0.37	0.803
933	ARL13B_KAN508-17_3.tif:0011-0629	0.286	398	321	578	17.056	101.375	0.659	113.835	4378	2.127	0.47	0.786	0.0974551				949	Ac-Tub_KAN508-17_3.tif:0011-0629	0.286	224.091	57	760	17.056	101.375	0.659	64.094	2465	2.127	0.47	0.786
934	ARL13B_KAN508-17_3.tif:0012-0698	1.508	1002.74	333	2310	210.317	112.519	0.657	1512.22	58159	3.09	0.324	0.906	1.29463				950	Ac-Tub_KAN508-17_3.tif:0012-0698	1.508	109.293	0	590	210.317	112.519	0.657	164.824	6339	3.09	0.324	0.906
935	ARL13B_KAN508-17_3.tif:0013-0760	0.78	391.833	300	516	148.028	122.631	0.714	305.648	11755	2.575	0.388	0.789	0.261669				951	Ac-Tub_KAN508-17_3.tif:0013-0760	0.78	273.267	5	975	148.028	122.631	0.714	213.161	8198	2.575	0.388	0.789
936	ARL13B_KAN508-17_3.tif:0014-0890	1.118	437.372	302	659	211.536	143.522	0.322	489.011	18807	6.678	0.15	0.677	0.418647				952	Ac-Tub_KAN508-17_3.tif:0014-0890	1.118	616.116	21	1561	211.536	143.522	0.322	688.859	26493	6.678	0.15	0.677
937	ARL13B_KAN508-17_3.tif:0015-0911	1.092	619.405	310	1292	190.198	147.018	0.572	676.431	26015	2.088	0.479	0.706	0.579099				953	Ac-Tub_KAN508-17_3.tif:0015-0911	1.092	607.143	0	2892	190.198	147.018	0.572	663.04	25500	2.088	0.479	0.706
938	ARL13B_KAN508-17_3.tif:0016-0961	1.066	474.976	310	698	115.563	155.183	0.284	506.354	19474	3.902	0.256	0.474	0.433495				954	Ac-Tub_KAN508-17_3.tif:0016-0961	1.066	693.829	0	1797	115.563	155.183	0.284	739.667	28447	3.902	0.256	0.474
955	ARL13B_KAN508-17_4.tif:0001-0189	1.456	1045.09	318	3057	159.292	30.525	0.647	1521.74	58525	2.648	0.378	0.783	1.30278				968	Ac-Tub_KAN508-17_4.tif:0001-0189	1.456	1106.25	11	3431	159.292	30.525	0.647	1610.8	61950	2.648	0.378	0.783
956	ARL13B_KAN508-17_4.tif:0002-0330	1.17	524.778	280	883	194.444	53.34	0.485	614.027	23615	4.284	0.233	0.804	0.525675				969	Ac-Tub_KAN508-17_4.tif:0002-0330	1.17	1007.53	328	2150	194.444	53.34	0.485	1178.88	45339	4.284	0.233	0.804
957	ARL13B_KAN508-17_4.tif:0003-0362	1.82	761.743	271	1659	119.548	58.46	0.652	1386.45	53322	3.029	0.33	0.952	1.18696				970	Ac-Tub_KAN508-17_4.tif:0003-0362	1.82	1351.76	0	3285	119.548	58.46	0.652	2460.35	94623	3.029	0.33	0.952
958	ARL13B_KAN508-17_4.tif:0004-0431	1.092	900.714	50	1915	185.829	69.364	0.511	983.639	37830	2.186	0.457	0.683	0.842103				971	Ac-Tub_KAN508-17_4.tif:0004-0431	1.092	91.214	0	283	185.829	69.364	0.511	99.612	3831	2.186	0.457	0.683
959	ARL13B_KAN508-17_4.tif:0005-0509	1.846	507.042	68	1444	58.203	82.136	0.247	936.056	36000	4.007	0.25	0.47	0.801367				972	Ac-Tub_KAN508-17_4.tif:0005-0509	1.846	962.915	85	2407	58.203	82.136	0.247	1777.65	68367	4.007	0.25	0.47
960	ARL13B_KAN508-17_4.tif:0006-0617	1.118	624.047	329	1112	173.443	99.497	0.487	697.726	26834	4.543	0.22	0.86	0.59733				973	Ac-Tub_KAN508-17_4.tif:0006-0617	1.118	1137.95	105	2528	173.443	99.497	0.487	1272.31	48932	4.543	0.22	0.86
961	ARL13B_KAN508-17_4.tif:0007-0622	1.69	641.615	261	1272	139.708	100.172	0.601	1084.39	41705	2.677	0.373	0.756	0.928361				974	Ac-Tub_KAN508-17_4.tif:0007-0622	1.69	1449.94	343	3154	139.708	100.172	0.601	2450.54	94246	2.677	0.373	0.756
962	ARL13B_KAN508-17_4.tif:0008-0672	1.222	726.851	300	1364	116.929	108.403	0.64	888.265	34162	2.902	0.345	0.803	0.760453				975	Ac-Tub_KAN508-17_4.tif:0008-0672	1.222	998	26	2211	116.929	108.403	0.64	1219.63	46906	2.902	0.345	0.803
963	ARL13B_KAN508-17_4.tif:0009-0780	0.884	421.941	306	619	62.157	125.761	0.292	373.018	14346	6.046	0.165	0.562	0.319345				976	Ac-Tub_KAN508-17_4.tif:0009-0780	0.884	956.824	291	1654	62.157	125.761	0.292	845.883	32532	6.046	0.165	0.562
964	ARL13B_KAN508-17_4.tif:0010-0824	1.3	525.44	24	1195	169.496	133.228	0.216	683.113	26272	4.774	0.209	0.498	0.58482				977	Ac-Tub_KAN508-17_4.tif:0010-0824	1.3	1161.18	100	3066	169.496	133.228	0.216	1509.62	58059	4.774	0.209	0.498
965	ARL13B_KAN508-17_4.tif:0011-0856	1.794	784.826	316	1405	20.4	138.085	0.452	1408.06	54153	4.589	0.218	0.767	1.20546				978	Ac-Tub_KAN508-17_4.tif:0011-0856	1.794	854.319	21	1970	20.4	138.085	0.452	1532.74	58948	4.589	0.218	0.767
966	ARL13B_KAN508-17_4.tif:0012-0928	1.482	629.614	317	1431	6.004	149.738	0.527	933.144	35888	3.863	0.259	0.792	0.798874				979	Ac-Tub_KAN508-17_4.tif:0012-0928	1.482	872.491	179	2066	6.004	149.738	0.527	1293.11	49732	3.863	0.259	0.792
967	ARL13B_KAN508-17_4.tif:0013-0984	0.962	622.459	352	912	206.781	158.764	0.377	598.842	23031	5.867	0.17	0.705	0.512675				980	Ac-Tub_KAN508-17_4.tif:0013-0984	0.962	924.703	135	2771	206.781	158.764	0.377	889.618	34214	5.867	0.17	0.705
981	ARL13B_KAN508-17_5.tif:0001-0015	1.326	818.471	307	1740	70.199	2.427	0.722	1085.36	41742	2.421	0.413	0.843	0.929185				987	Ac-Tub_KAN508-17_5.tif:0001-0015	1.326	504.176	0	2029	70.199	2.427	0.722	668.578	25713	2.421	0.413	0.843
982	ARL13B_KAN508-17_5.tif:0002-0027	1.326	737.843	250	2355	111.922	4.346	0.668	978.439	37630	2.938	0.34	0.829	0.837651				988	Ac-Tub_KAN508-17_5.tif:0002-0027	1.326	555.196	0	2155	111.922	4.346	0.668	736.234	28315	2.938	0.34	0.829
983	ARL13B_KAN508-17_5.tif:0003-0283	1.482	1044.63	337	2123	91.334	45.791	0.544	1548.24	59544	3.761	0.266	0.809	1.32546				989	Ac-Tub_KAN508-17_5.tif:0003-0283	1.482	226.228	0	1260	91.334	45.791	0.544	335.29	12895	3.761	0.266	0.809
984	ARL13B_KAN508-17_5.tif:0004-0298	0.884	600.5	317	1093	166.073	48.086	0.77	530.874	20417	2.109	0.474	0.85	0.454486				990	Ac-Tub_KAN508-17_5.tif:0004-0298	0.884	1024.38	65	2086	166.073	48.086	0.77	905.609	34829	2.109	0.474	0.85
985	ARL13B_KAN508-17_5.tif:0005-0380	1.742	741.866	301	1396	135.093	61.259	0.385	1292.41	49705	5.262	0.19	0.709	1.10644				991	Ac-Tub_KAN508-17_5.tif:0005-0380	1.742	71.701	0	653	135.093	61.259	0.385	124.912	4804	5.262	0.19	0.709
986	ARL13B_KAN508-17_5.tif:0006-0529	1.768	1057.03	304	2244	208.902	85.292	0.737	1868.94	71878	2.075	0.482	0.861	1.60002				992	Ac-Tub_KAN508-17_5.tif:0006-0529	1.768	415.691	0	3312	208.902	85.292	0.737	734.986	28267	2.075	0.482	0.861
993	ARL13B_KAN508-17_6.tif:0001-0020	0.91	429.229	310	673	91.5	3.218	0.469	390.622	15023	4.018	0.249	0.673	0.334415				1007	Ac-Tub_KAN508-17_6.tif:0001-0020	0.91	621.771	184	1262	91.5	3.218	0.469	565.846	21762	4.018	0.249	0.673
994	ARL13B_KAN508-17_6.tif:0002-0073	1.898	762.986	296	1537	193	11.748	0.484	1448.23	55698	4.245	0.236	0.811	1.23985				1008	Ac-Tub_KAN508-17_6.tif:0002-0073	1.898	722.205	152	1337	193	11.748	0.484	1370.83	52721	4.245	0.236	0.811
995	ARL13B_KAN508-17_6.tif:0003-0275	0.962	506.189	145	1043	20.568	44.442	0.612	486.983	18729	2.817	0.355	0.804	0.416911				1009	Ac-Tub_KAN508-17_6.tif:0003-0275	0.962	553.541	23	1329	20.568	44.442	0.612	532.538	20481	2.817	0.355	0.804
996	ARL13B_KAN508-17_6.tif:0004-0318	2.756	736.057	45	1519	196.511	51.376	0.347	2028.69	78022	3.368	0.297	0.622	1.73678				1010	Ac-Tub_KAN508-17_6.tif:0004-0318	2.756	1082.83	0	3142	196.511	51.376	0.347	2984.46	114780	3.368	0.297	0.622
997	ARL13B_KAN508-17_6.tif:0005-0347	1.378	783.698	303	1624	115.712	56.004	0.639	1080	41536	3.076	0.325	0.774	0.924599				1011	Ac-Tub_KAN508-17_6.tif:0005-0347	1.378	970.566	270	1851	115.712	56.004	0.639	1337.52	51440	3.076	0.325	0.774
998	ARL13B_KAN508-17_6.tif:0006-0362	0.26	386.8	300	548	185.873	58.469	0.462	100.574	3868	3.826	0.261	0.667	0.0861024				1012	Ac-Tub_KAN508-17_6.tif:0006-0362	0.26	2.5	0	8	185.873	58.469	0.462	0.65	25	3.826	0.261	0.667
999	ARL13B_KAN508-17_6.tif:0007-0385	0.286	403.455	301	517	27.83	62.118	0.715	115.395	4438	2.318	0.431	0.759	0.0987907				1013	Ac-Tub_KAN508-17_6.tif:0007-0385	0.286	468.909	210	906	27.83	62.118	0.715	134.116	5158	2.318	0.431	0.759
1000	ARL13B_KAN508-17_6.tif:0008-0494	1.248	459.5	304	721	99.8	79.59	0.719	573.491	22056	1.969	0.508	0.857	0.490971				1014	Ac-Tub_KAN508-17_6.tif:0008-0494	1.248	404.833	184	589	99.8	79.59	0.719	505.262	19432	1.969	0.508	0.857
1001	ARL13B_KAN508-17_6.tif:0009-0757	1.3	401.14	156	709	142.639	121.77	0.414	521.513	20057	2.614	0.383	0.621	0.446473				1015	Ac-Tub_KAN508-17_6.tif:0009-0757	1.3	389.32	68	688	142.639	121.77	0.414	506.146	19466	2.614	0.383	0.621
1002	ARL13B_KAN508-17_6.tif:0010-0800	1.378	511.358	303	870	69.78	129.002	0.375	704.694	27102	5.617	0.178	0.763	0.603296				1016	Ac-Tub_KAN508-17_6.tif:0010-0800	1.378	1278.38	504	2044	69.78	129.002	0.375	1761.71	67754	5.617	0.178	0.763
1003	ARL13B_KAN508-17_6.tif:0011-0885	1.092	566.905	302	864	206.116	142.779	0.496	619.097	23810	4.226	0.237	0.743	0.530015				1017	Ac-Tub_KAN508-17_6.tif:0011-0885	1.092	964.405	221	1991	206.116	142.779	0.496	1053.19	40505	4.226	0.237	0.743
1004	ARL13B_KAN508-17_6.tif:0012-0979	1.404	498.204	274	805	51.364	157.852	0.416	699.52	26903	4.141	0.241	0.711	0.598866				1018	Ac-Tub_KAN508-17_6.tif:0012-0979	1.404	569.574	0	1412	51.364	157.852	0.416	799.73	30757	4.141	0.241	0.711
1005	ARL13B_KAN508-17_6.tif:0013-1011	1.014	492.692	301	796	125.636	162.976	0.467	499.62	19215	4.766	0.21	0.78	0.42773				1019	Ac-Tub_KAN508-17_6.tif:0013-1011	1.014	682.333	206	1015	125.636	162.976	0.467	691.928	26611	4.766	0.21	0.78
1006	ARL13B_KAN508-17_6.tif:0014-1026	1.274	464.163	306	712	62.379	165.359	0.656	591.38	22744	2.591	0.386	0.838	0.506286				1020	Ac-Tub_KAN508-17_6.tif:0014-1026	1.274	381.857	61	826	62.379	165.359	0.656	486.515	18711	2.591	0.386	0.838
										34890.9				0.776678
1021	ARL13B_KAN508-18_1.tif:0001-0149	1.508	1021.17	307	1835	143.254	24.107	0.584	1540.02	59228	3.607	0.277	0.872	1.31843				1032	Ac-Tub_KAN508-18_1.tif:0001-0149	1.508	1225.05	24	3160	143.254	24.107	0.584	1847.49	71053	3.607	0.277	0.872
1022	ARL13B_KAN508-18_1.tif:0002-0166	1.586	674.59	305	1209	87.69	26.84	0.406	1069.96	41150	5.428	0.184	0.744	0.916007				1033	Ac-Tub_KAN508-18_1.tif:0002-0166	1.586	1235.44	215	2934	87.69	26.84	0.406	1959.53	75362	5.428	0.184	0.744
1023	ARL13B_KAN508-18_1.tif:0003-0374	1.534	841.254	233	1651	103.89	60.295	0.462	1290.56	49634	3.676	0.272	0.678	1.10486				1034	Ac-Tub_KAN508-18_1.tif:0003-0374	1.534	1126.68	144	3266	103.89	60.295	0.462	1728.43	66474	3.676	0.272	0.678
1024	ARL13B_KAN508-18_1.tif:0004-0381	0.364	340.857	292	433	200.607	61.448	0.75	124.079	4772	2.069	0.483	0.757	0.106226				1035	Ac-Tub_KAN508-18_1.tif:0004-0381	0.364	754.429	297	1288	200.607	61.448	0.75	274.629	10562	2.069	0.483	0.757
1025	ARL13B_KAN508-18_1.tif:0005-0459	1.248	502.479	230	811	31.803	74.061	0.731	627.132	24119	2.447	0.409	0.897	0.536894				1036	Ac-Tub_KAN508-18_1.tif:0005-0459	1.248	774.062	290	1467	31.803	74.061	0.731	966.088	37155	2.447	0.409	0.897
1026	ARL13B_KAN508-18_1.tif:0006-0514	1.794	473.391	300	1045	111.301	82.853	0.493	849.315	32664	4.206	0.238	0.746	0.727107				1037	Ac-Tub_KAN508-18_1.tif:0006-0514	1.794	566.087	0	1352	111.301	82.853	0.493	1015.62	39060	4.206	0.238	0.746
1027	ARL13B_KAN508-18_1.tif:0007-0542	0.494	395.895	300	530	67.364	87.453	0.589	195.584	7522	3.001	0.333	0.76	0.167441				1038	Ac-Tub_KAN508-18_1.tif:0007-0542	0.494	1189.84	657	2052	67.364	87.453	0.589	587.817	22607	3.001	0.333	0.76
1028	ARL13B_KAN508-18_1.tif:0008-0637	1.092	769.81	131	1615	97.46	102.616	0.618	840.683	32332	2.898	0.345	0.771	0.719717				1039	Ac-Tub_KAN508-18_1.tif:0008-0637	1.092	1019.26	94	2250	97.46	102.616	0.618	1113.1	42809	2.898	0.345	0.771
1029	ARL13B_KAN508-18_1.tif:0009-0793	2.08	818.562	244	1967	107.421	127.964	0.467	1702.71	65485	4.23	0.236	0.766	1.45771				1040	Ac-Tub_KAN508-18_1.tif:0009-0793	2.08	666.225	21	2319	107.421	127.964	0.467	1385.83	53298	4.23	0.236	0.766
1030	ARL13B_KAN508-18_1.tif:0010-0882	0.26	318.7	292	349	189.711	142.206	0.65	82.867	3187	2.294	0.436	0.741	0.0709432				1041	Ac-Tub_KAN508-18_1.tif:0010-0882	0.26	479.7	299	709	189.711	142.206	0.65	124.73	4797	2.294	0.436	0.741
1031	ARL13B_KAN508-18_1.tif:0011-0951	1.04	420.5	302	674	141.162	153.369	0.428	437.346	16820	4.8	0.208	0.667	0.374416				1042	Ac-Tub_KAN508-18_1.tif:0011-0951	1.04	1174.72	622	1639	141.162	153.369	0.428	1221.79	46989	4.8	0.208	0.667
1043	ARL13B_KAN508-18_2.tif:0001-0104	1.69	1113.97	158	2847	127.18	16.791	0.545	1882.72	72408	3.86	0.259	0.878	1.61182				1052	Ac-Tub_KAN508-18_2.tif:0001-0104	1.69	483.2	0	1814	127.18	16.791	0.545	816.657	31408	3.86	0.259	0.878
1044	ARL13B_KAN508-18_2.tif:0002-0215	1.586	778.623	313	1278	148.187	34.747	0.397	1234.97	47496	5.62	0.178	0.758	1.05727				1053	Ac-Tub_KAN508-18_2.tif:0002-0215	1.586	818.41	59	2680	148.187	34.747	0.397	1298.08	49923	5.62	0.178	0.758
1045	ARL13B_KAN508-18_2.tif:0003-0489	1.118	565.349	64	1054	92.083	78.913	0.791	632.098	24310	1.97	0.508	0.851	0.541145				1054	Ac-Tub_KAN508-18_2.tif:0003-0489	1.118	1149.23	263	2447	92.083	78.913	0.791	1284.92	49417	1.97	0.508	0.851
1046	ARL13B_KAN508-18_2.tif:0004-0505	0.754	372.069	302	564	36.401	81.345	0.3	280.557	10790	5.749	0.174	0.592	0.240188				1055	Ac-Tub_KAN508-18_2.tif:0004-0505	0.754	1441.21	782	2599	36.401	81.345	0.3	1086.73	41795	5.749	0.174	0.592
1047	ARL13B_KAN508-18_2.tif:0005-0613	1.482	1183.98	304	3629	136.62	98.969	0.631	1754.77	67487	3.041	0.329	0.77	1.50227				1056	Ac-Tub_KAN508-18_2.tif:0005-0613	1.482	1055.56	174	3135	136.62	98.969	0.631	1564.44	60167	3.041	0.329	0.77
1048	ARL13B_KAN508-18_2.tif:0006-0696	0.962	475.243	327	641	27.938	112.328	0.391	457.212	17584	6.342	0.158	0.871	0.391423				1057	Ac-Tub_KAN508-18_2.tif:0006-0696	0.962	1002.43	59	1662	27.938	112.328	0.391	964.398	37090	6.342	0.158	0.871
1049	ARL13B_KAN508-18_2.tif:0007-0875	0.676	408.577	300	585	87.236	141.094	0.333	276.215	10623	7.135	0.14	0.722	0.23647				1058	Ac-Tub_KAN508-18_2.tif:0007-0875	0.676	988.269	379	1854	87.236	141.094	0.333	668.11	25695	7.135	0.14	0.722
1050	ARL13B_KAN508-18_2.tif:0008-0930	1.196	532.978	307	834	85.596	150.092	0.555	637.48	24517	3.791	0.264	0.78	0.545753				1059	Ac-Tub_KAN508-18_2.tif:0008-0930	1.196	671.261	128	1572	85.596	150.092	0.555	802.876	30878	3.791	0.264	0.78
1051	ARL13B_KAN508-18_2.tif:0009-1009	1.534	703.983	305	1379	21.825	162.858	0.773	1079.97	41535	2.007	0.498	0.868	0.924577				1060	Ac-Tub_KAN508-18_2.tif:0009-1009	1.534	581.983	244	1010	21.825	162.858	0.773	892.816	34337	2.007	0.498	0.868
1061	ARL13B_KAN508-18_3.tif:0001-0098	1.924	1252.13	275	3699	158.491	15.774	0.798	2409.25	92658	2.299	0.435	0.949	2.06259				1082	Ac-Tub_KAN508-18_3.tif:0001-0098	1.924	901.257	0	2789	158.491	15.774	0.798	1734.12	66693	2.299	0.435	0.949
1062	ARL13B_KAN508-18_3.tif:0002-0133	2.886	865.631	287	1801	136.267	21.287	0.586	2498.36	96085	2.974	0.336	0.796	2.13887				1083	Ac-Tub_KAN508-18_3.tif:0002-0133	2.886	1553.43	0	3500	136.267	21.287	0.586	4483.48	172431	2.974	0.336	0.796
1063	ARL13B_KAN508-18_3.tif:0003-0168	1.066	968.024	305	1913	210.473	27.108	0.721	1031.98	39689	2.324	0.43	0.863	0.883485				1084	Ac-Tub_KAN508-18_3.tif:0003-0168	1.066	709.512	49	2134	210.473	27.108	0.721	756.386	29090	2.324	0.43	0.863
1064	ARL13B_KAN508-18_3.tif:0004-0192	1.872	551.694	328	1026	80.354	30.985	0.606	1032.83	39722	3.121	0.32	0.852	0.884219				1085	Ac-Tub_KAN508-18_3.tif:0004-0192	1.872	780.417	13	2323	80.354	30.985	0.606	1461.03	56190	3.121	0.32	0.852
1065	ARL13B_KAN508-18_3.tif:0005-0252	1.534	730.051	208	1497	21.478	40.686	0.468	1119.96	43073	4.268	0.234	0.756	0.958813				1086	Ac-Tub_KAN508-18_3.tif:0005-0252	1.534	469.797	57	1922	21.478	40.686	0.468	720.711	27718	4.268	0.234	0.756
1066	ARL13B_KAN508-18_3.tif:0006-0276	2.392	1053.89	303	2359	147.209	44.656	0.752	2521.06	96958	2.182	0.458	0.88	2.1583				1087	Ac-Tub_KAN508-18_3.tif:0006-0276	2.392	1037.93	0	2730	147.209	44.656	0.752	2482.89	95490	2.182	0.458	0.88
1067	ARL13B_KAN508-18_3.tif:0007-0315	2.314	881.775	305	2250	101.299	50.989	0.544	2040.55	78478	3.214	0.311	0.751	1.74694				1088	Ac-Tub_KAN508-18_3.tif:0007-0315	2.314	829.82	0	2679	101.299	50.989	0.544	1920.32	73854	3.214	0.311	0.751
1068	ARL13B_KAN508-18_3.tif:0008-0314	1.612	517.516	300	768	47.153	50.734	0.743	834.286	32086	2.307	0.433	0.892	0.714241				1089	Ac-Tub_KAN508-18_3.tif:0008-0314	1.612	769.71	208	1365	47.153	50.734	0.743	1240.85	47722	2.307	0.433	0.892
1069	ARL13B_KAN508-18_3.tif:0009-0375	0.858	361.576	306	444	10.894	60.437	0.506	310.251	11932	4.253	0.235	0.75	0.265609				1090	Ac-Tub_KAN508-18_3.tif:0009-0375	0.858	857.758	262	1350	10.894	60.437	0.506	736	28306	4.253	0.235	0.75
1070	ARL13B_KAN508-18_3.tif:0010-0455	2.366	1127.23	245	3723	147.453	73.604	0.735	2667.19	102578	2.255	0.443	0.863	2.28341				1091	Ac-Tub_KAN508-18_3.tif:0010-0455	2.366	691.868	0	2690	147.453	73.604	0.735	1637.06	62960	2.255	0.443	0.863
1071	ARL13B_KAN508-18_3.tif:0011-0546	1.69	1017.01	302	2311	205.178	88.061	0.522	1718.86	66106	4.082	0.245	0.828	1.47153				1092	Ac-Tub_KAN508-18_3.tif:0011-0546	1.69	238.569	0	1688	205.178	88.061	0.522	403.206	15507	4.082	0.245	0.828
1072	ARL13B_KAN508-18_3.tif:0012-0565	0.884	876.294	305	2342	25.022	91.168	0.793	774.691	29794	2.101	0.476	0.8	0.66322				1093	Ac-Tub_KAN508-18_3.tif:0012-0565	0.884	472.941	50	1980	25.022	91.168	0.793	418.105	16080	2.101	0.476	0.8
1073	ARL13B_KAN508-18_3.tif:0013-0613	2.288	549.068	32	1531	160.752	98.795	0.496	1256.34	48318	3.352	0.298	0.704	1.07557				1094	Ac-Tub_KAN508-18_3.tif:0013-0613	2.288	713.477	0	2423	160.752	98.795	0.496	1632.53	62786	3.352	0.298	0.704
1074	ARL13B_KAN508-18_3.tif:0014-0629	1.69	538.754	85	1181	52.271	101.574	0.381	910.549	35019	4.13	0.242	0.65	0.77953				1095	Ac-Tub_KAN508-18_3.tif:0014-0629	1.69	448.123	0	1543	52.271	101.574	0.381	757.374	29128	4.13	0.242	0.65
1075	ARL13B_KAN508-18_3.tif:0015-0634	0.78	522.733	305	1229	100.937	102.329	0.484	407.757	15682	4.281	0.234	0.789	0.349084				1096	Ac-Tub_KAN508-18_3.tif:0015-0634	0.78	467.733	25	1052	100.937	102.329	0.484	364.854	14032	4.281	0.234	0.789
1076	ARL13B_KAN508-18_3.tif:0016-0705	1.326	674.471	303	1176	52.051	113.61	0.469	894.402	34398	4.493	0.223	0.773	0.765706				1097	Ac-Tub_KAN508-18_3.tif:0016-0705	1.326	660.529	10	2439	52.051	113.61	0.469	875.915	33687	4.493	0.223	0.773
1077	ARL13B_KAN508-18_3.tif:0017-0761	0.91	426.029	300	605	211.853	122.695	0.74	387.709	14911	2.434	0.411	0.843	0.331922				1098	Ac-Tub_KAN508-18_3.tif:0017-0761	0.91	245.171	0	764	211.853	122.695	0.74	223.119	8581	2.434	0.411	0.843
1078	ARL13B_KAN508-18_3.tif:0018-0941	1.872	628.778	301	1184	80.522	151.839	0.622	1177.14	45272	3.309	0.302	0.923	1.00776				1099	Ac-Tub_KAN508-18_3.tif:0018-0941	1.872	325.542	0	1027	80.522	151.839	0.622	609.451	23439	3.309	0.302	0.923
1079	ARL13B_KAN508-18_3.tif:0019-0949	0.572	420	302	569	47.298	153.085	0.788	240.254	9240	2.256	0.443	0.83	0.205684				1100	Ac-Tub_KAN508-18_3.tif:0019-0949	0.572	578.455	160	958	47.298	153.085	0.788	330.896	12726	2.256	0.443	0.83
1080	ARL13B_KAN508-18_3.tif:0020-0971	1.326	438.314	289	683	76.317	156.664	0.679	581.239	22354	2.796	0.358	0.887	0.497604				1101	Ac-Tub_KAN508-18_3.tif:0020-0971	1.326	355.51	0	831	76.317	156.664	0.679	471.434	18131	2.796	0.358	0.887
1081	ARL13B_KAN508-18_3.tif:0021-0979	0.728	392.179	301	494	148.206	157.87	0.592	285.523	10981	3.648	0.274	0.778	0.244439				1102	Ac-Tub_KAN508-18_3.tif:0021-0979	0.728	567.893	62	1462	148.206	157.87	0.592	413.451	15901	3.648	0.274	0.778
1103	ARL13B_KAN508-18_4.tif:0001-0125	1.664	1065.8	307	1874	220.95	20.33	0.517	1773.59	68211	3.673	0.272	0.815	1.51839				1122	Ac-Tub_KAN508-18_4.tif:0001-0125	1.664	601.328	0	2438	220.95	20.33	0.517	1000.67	38485	3.673	0.272	0.815
1104	ARL13B_KAN508-18_4.tif:0002-0203	1.742	854.761	300	1719	130.265	32.838	0.498	1489.08	57269	4.35	0.23	0.793	1.27482				1123	Ac-Tub_KAN508-18_4.tif:0002-0203	1.742	1060.87	41	2644	130.265	32.838	0.498	1848.14	71078	4.35	0.23	0.793
1105	ARL13B_KAN508-18_4.tif:0003-0276	1.716	957.167	301	2151	163.253	44.593	0.607	1642.6	63173	2.984	0.335	0.82	1.40624				1124	Ac-Tub_KAN508-18_4.tif:0003-0276	1.716	744.576	0	2738	163.253	44.593	0.607	1277.77	49142	2.984	0.335	0.82
1106	ARL13B_KAN508-18_4.tif:0004-0356	1.742	760.672	301	1400	216.678	57.457	0.528	1325.17	50965	3.831	0.261	0.753	1.13449				1125	Ac-Tub_KAN508-18_4.tif:0004-0356	1.742	751.373	0	2686	216.678	57.457	0.528	1308.97	50342	3.831	0.261	0.753
1107	ARL13B_KAN508-18_4.tif:0005-0362	4.966	1339.4	0	3738	95.689	58.581	0.265	6651.85	255825	1.87	0.535	0.51	5.69471				1126	Ac-Tub_KAN508-18_4.tif:0005-0362	4.966	974.031	0	2765	95.689	58.581	0.265	4837.33	186040	1.87	0.535	0.51
1108	ARL13B_KAN508-18_4.tif:0006-0376	1.04	676.6	309	1412	20.495	60.521	0.722	703.706	27064	1.939	0.516	0.8	0.60245				1127	Ac-Tub_KAN508-18_4.tif:0006-0376	1.04	569.4	29	1447	20.495	60.521	0.722	592.212	22776	1.939	0.516	0.8
1109	ARL13B_KAN508-18_4.tif:0007-0453	2.002	581.61	77	1621	196.59	73.119	0.396	1164.45	44784	4.985	0.201	0.755	0.996901				1128	Ac-Tub_KAN508-18_4.tif:0007-0453	2.002	361.377	0	1974	196.59	73.119	0.396	723.52	27826	4.985	0.201	0.755
1110	ARL13B_KAN508-18_4.tif:0008-0475	2.496	793.75	302	1641	91.566	76.683	0.586	1981.32	76200	3.583	0.279	0.831	1.69623				1129	Ac-Tub_KAN508-18_4.tif:0008-0475	2.496	770.292	0	2011	91.566	76.683	0.586	1922.76	73948	3.583	0.279	0.831
1111	ARL13B_KAN508-18_4.tif:0009-0583	0.884	508.588	239	821	180.662	93.942	0.699	449.619	17292	2.364	0.423	0.84	0.384923				1130	Ac-Tub_KAN508-18_4.tif:0009-0583	0.884	854.588	6	3296	180.662	93.942	0.699	755.501	29056	2.364	0.423	0.84
1112	ARL13B_KAN508-18_4.tif:0010-0588	0.806	565.516	308	1085	57.397	94.823	0.795	455.833	17531	1.978	0.506	0.849	0.390243				1131	Ac-Tub_KAN508-18_4.tif:0010-0588	0.806	551.871	83	1805	57.397	94.823	0.795	444.835	17108	1.978	0.506	0.849
1113	ARL13B_KAN508-18_4.tif:0011-0647	1.3	611.18	125	1140	214.443	104.409	0.392	794.582	30559	4.733	0.211	0.654	0.680249				1132	Ac-Tub_KAN508-18_4.tif:0011-0647	1.3	619.48	0	3522	214.443	104.409	0.392	805.372	30974	4.733	0.211	0.654
1114	ARL13B_KAN508-18_4.tif:0012-0660	2.028	1414.99	305	3662	179.521	106.359	0.79	2869.77	110369	1.805	0.554	0.857	2.45684				1133	Ac-Tub_KAN508-18_4.tif:0012-0660	2.028	713.667	40	2602	179.521	106.359	0.79	1447.4	55666	1.805	0.554	0.857
1115	ARL13B_KAN508-18_4.tif:0013-0707	1.17	533.511	218	1111	27.622	113.927	0.419	624.246	24008	4.953	0.202	0.833	0.534423				1134	Ac-Tub_KAN508-18_4.tif:0013-0707	1.17	718.867	75	1323	27.622	113.927	0.419	841.125	32349	4.953	0.202	0.833
1116	ARL13B_KAN508-18_4.tif:0014-0713	0.91	624.314	349	924	93.297	115.006	0.512	568.16	21851	4.056	0.247	0.824	0.486408				1135	Ac-Tub_KAN508-18_4.tif:0014-0713	0.91	1194.37	0	2657	93.297	115.006	0.512	1086.94	41803	4.056	0.247	0.824
1117	ARL13B_KAN508-18_4.tif:0015-0822	1.586	476.164	307	762	173.683	132.657	0.25	755.241	29046	8.107	0.123	0.595	0.64657				1136	Ac-Tub_KAN508-18_4.tif:0015-0822	1.586	780.295	0	2486	173.683	132.657	0.25	1237.62	47598	8.107	0.123	0.595
1118	ARL13B_KAN508-18_4.tif:0016-0855	1.56	1028.95	318	2543	29.632	138.03	0.47	1605.26	61737	4.014	0.249	0.723	1.37428				1137	Ac-Tub_KAN508-18_4.tif:0016-0855	1.56	308.017	0	1177	29.632	138.03	0.47	480.535	18481	4.014	0.249	0.723
1119	ARL13B_KAN508-18_4.tif:0017-0951	1.43	850.564	304	1615	99.809	153.365	0.532	1216.38	46781	3.758	0.266	0.786	1.04135				1138	Ac-Tub_KAN508-18_4.tif:0017-0951	1.43	945.6	0	3128	99.809	153.365	0.532	1352.29	52008	3.758	0.266	0.786
1120	ARL13B_KAN508-18_4.tif:0018-0972	0.988	462.895	306	685	154.473	156.85	0.373	457.368	17590	5.657	0.177	0.691	0.391557				1139	Ac-Tub_KAN508-18_4.tif:0018-0972	0.988	802.684	0	2860	154.473	156.85	0.373	793.1	30502	5.657	0.177	0.691
1121	ARL13B_KAN508-18_4.tif:0019-1024	0.884	672.588	249	1592	181.027	165.21	0.77	594.604	22868	2.297	0.435	0.829	0.509046				1140	Ac-Tub_KAN508-18_4.tif:0019-1024	0.884	882.441	152	2048	181.027	165.21	0.77	780.125	30003	2.297	0.435	0.829
1141	ARL13B_KAN508-18_5.tif:0001-0135	1.326	862.471	316	1615	150.587	21.894	0.581	1143.7	43986	3.4	0.294	0.797	0.979137				1155	Ac-Tub_KAN508-18_5.tif:0001-0135	1.326	691.765	0	2283	150.587	21.894	0.581	917.335	35280	3.4	0.294	0.797
1142	ARL13B_KAN508-18_5.tif:0002-0168	1.222	547.766	301	1010	87.732	27.023	0.721	669.41	25745	2.396	0.417	0.817	0.573089				1156	Ac-Tub_KAN508-18_5.tif:0002-0168	1.222	538.128	0	1610	87.732	27.023	0.721	657.632	25292	2.396	0.417	0.817
1143	ARL13B_KAN508-18_5.tif:0003-0236	1.092	512.262	290	966	174.162	38.155	0.493	559.424	21515	4.314	0.232	0.792	0.478928				1157	Ac-Tub_KAN508-18_5.tif:0003-0236	1.092	417.048	0	1234	174.162	38.155	0.493	455.443	17516	4.314	0.232	0.792
1144	ARL13B_KAN508-18_5.tif:0004-0250	1.716	1000.36	301	2034	31.852	40.33	0.441	1716.73	66024	4.462	0.224	0.702	1.46971				1158	Ac-Tub_KAN508-18_5.tif:0004-0250	1.716	456.121	0	2176	31.852	40.33	0.441	782.751	30104	4.462	0.224	0.702
1145	ARL13B_KAN508-18_5.tif:0005-0352	1.43	674.618	303	1132	204.581	56.835	0.475	964.762	37104	4.376	0.229	0.809	0.825942				1159	Ac-Tub_KAN508-18_5.tif:0005-0352	1.43	227.527	0	906	204.581	56.835	0.475	325.384	12514	4.376	0.229	0.809
1146	ARL13B_KAN508-18_5.tif:0006-0509	1.794	777.754	267	1517	171.739	82.003	0.646	1395.37	53665	2.736	0.366	0.826	1.19459				1160	Ac-Tub_KAN508-18_5.tif:0006-0509	1.794	234.072	0	1676	171.739	82.003	0.646	419.951	16151	2.736	0.366	0.826
1147	ARL13B_KAN508-18_5.tif:0007-0541	1.43	918.873	305	2069	83.464	87.211	0.791	1314.07	50538	2.16	0.463	0.909	1.12499				1161	Ac-Tub_KAN508-18_5.tif:0007-0541	1.43	448.473	0	1648	83.464	87.211	0.791	641.355	24666	2.16	0.463	0.909
1148	ARL13B_KAN508-18_5.tif:0008-0585	1.612	612.968	304	944	10.32	94.381	0.732	988.164	38004	2.466	0.406	0.855	0.845976				1162	Ac-Tub_KAN508-18_5.tif:0008-0585	1.612	464.371	0	884	10.32	94.381	0.732	748.611	28791	2.466	0.406	0.855
1149	ARL13B_KAN508-18_5.tif:0009-0622	1.69	862.2	310	1735	148.624	100.279	0.65	1457.21	56043	2.73	0.366	0.844	1.24753				1163	Ac-Tub_KAN508-18_5.tif:0009-0622	1.69	685.508	0	2698	148.624	100.279	0.65	1158.58	44558	2.73	0.366	0.844
1150	ARL13B_KAN508-18_5.tif:0010-0692	1.352	685.462	310	1235	178.091	111.628	0.503	926.8	35644	4.02	0.249	0.748	0.793442				1164	Ac-Tub_KAN508-18_5.tif:0010-0692	1.352	369.346	0	1382	178.091	111.628	0.503	499.386	19206	4.02	0.249	0.748
1151	ARL13B_KAN508-18_5.tif:0011-0756	1.508	689.362	60	1256	39.403	121.93	0.285	1039.62	39983	5.619	0.178	0.55	0.890029				1165	Ac-Tub_KAN508-18_5.tif:0011-0756	1.508	454.81	0	2049	39.403	121.93	0.285	685.895	26379	5.619	0.178	0.55
1152	ARL13B_KAN508-18_5.tif:0012-0820	0.806	768.161	333	1639	117.309	132.368	0.625	619.175	23813	3.092	0.323	0.775	0.530082				1166	Ac-Tub_KAN508-18_5.tif:0012-0820	0.806	424.581	0	1503	117.309	132.368	0.625	342.233	13162	3.092	0.323	0.775
1153	ARL13B_KAN508-18_5.tif:0013-0855	1.17	818.044	304	1511	56.296	137.82	0.539	957.17	36812	3.86	0.259	0.804	0.819442				1167	Ac-Tub_KAN508-18_5.tif:0013-0855	1.17	677.378	106	1747	56.296	137.82	0.539	792.58	30482	3.86	0.259	0.804
1154	ARL13B_KAN508-18_5.tif:0014-0899	2.34	698.956	254	1394	213.504	144.856	0.497	1635.65	62906	2.948	0.339	0.69	1.4003				1168	Ac-Tub_KAN508-18_5.tif:0014-0899	2.34	396.922	0	1326	213.504	144.856	0.497	928.854	35723	2.948	0.339	0.69
1169	ARL13B_KAN508-18_6.tif:0001-0017	1.3	461.06	300	729	82.892	2.738	0.381	599.414	23053	5.305	0.188	0.735	0.513164				1189	Ac-Tub_KAN508-18_6.tif:0001-0017	1.3	736.58	188	1505	82.892	2.738	0.381	957.612	36829	5.305	0.188	0.735
1170	ARL13B_KAN508-18_6.tif:0002-0048	1.404	732.796	315	1380	197.146	7.946	0.397	1028.91	39571	5.495	0.182	0.684	0.880858				1190	Ac-Tub_KAN508-18_6.tif:0002-0048	1.404	478.407	54	1002	197.146	7.946	0.397	671.724	25834	5.495	0.182	0.684
1171	ARL13B_KAN508-18_6.tif:0003-0095	1.04	568.325	302	1017	205.501	15.347	0.425	591.094	22733	5.133	0.195	0.748	0.506041				1191	Ac-Tub_KAN508-18_6.tif:0003-0095	1.04	103.325	0	565	205.501	15.347	0.425	107.464	4133	5.133	0.195	0.748
1172	ARL13B_KAN508-18_6.tif:0004-0177	0.728	444.429	302	746	220.371	28.582	0.288	323.563	12444	6.701	0.149	0.589	0.277006				1192	Ac-Tub_KAN508-18_6.tif:0004-0177	0.728	21.821	0	109	220.371	28.582	0.288	15.887	611	6.701	0.149	0.589
1173	ARL13B_KAN508-18_6.tif:0005-0208	1.664	895.125	301	1831	222.737	33.603	0.47	1489.58	57288	4.715	0.212	0.771	1.27524				1193	Ac-Tub_KAN508-18_6.tif:0005-0208	1.664	177.469	0	903	222.737	33.603	0.47	295.326	11358	4.715	0.212	0.771
1174	ARL13B_KAN508-18_6.tif:0006-0243	1.222	1219.13	327	3304	178.56	39.213	0.681	1489.86	57299	2.776	0.36	0.817	1.27549				1194	Ac-Tub_KAN508-18_6.tif:0006-0243	1.222	285.511	0	1588	178.56	39.213	0.681	348.915	13419	2.776	0.36	0.817
1175	ARL13B_KAN508-18_6.tif:0007-0424	0.806	417.161	267	598	55.988	68.461	0.65	336.252	12932	3.617	0.276	0.969	0.287869				1195	Ac-Tub_KAN508-18_6.tif:0007-0424	0.806	396.484	82	734	55.988	68.461	0.65	319.585	12291	3.617	0.276	0.969
1176	ARL13B_KAN508-18_6.tif:0008-0447	1.534	536.508	305	790	33.142	72.228	0.449	823.054	31654	4.476	0.223	0.761	0.704624				1196	Ac-Tub_KAN508-18_6.tif:0008-0447	1.534	523.644	55	1088	33.142	72.228	0.449	803.318	30895	4.476	0.223	0.761
1177	ARL13B_KAN508-18_6.tif:0009-0549	1.846	1115.97	306	2416	125.156	88.543	0.644	2060.21	79234	2.751	0.363	0.835	1.76376				1197	Ac-Tub_KAN508-18_6.tif:0009-0549	1.846	866.817	39	2311	125.156	88.543	0.644	1600.24	61544	2.751	0.363	0.835
1178	ARL13B_KAN508-18_6.tif:0010-0556	1.69	595.677	308	1354	106.93	89.723	0.767	1006.75	38719	2.216	0.451	0.872	0.861892				1198	Ac-Tub_KAN508-18_6.tif:0010-0556	1.69	904.985	0	3229	106.93	89.723	0.767	1529.52	58824	2.216	0.451	0.872
1179	ARL13B_KAN508-18_6.tif:0011-0573	2.99	469.043	97	1120	162.152	92.25	0.129	1402.52	53940	11.376	0.088	0.522	1.20071				1199	Ac-Tub_KAN508-18_6.tif:0011-0573	2.99	11.313	0	98	162.152	92.25	0.129	33.828	1301	11.376	0.088	0.522
1180	ARL13B_KAN508-18_6.tif:0012-0582	0.832	485.562	302	781	170.547	93.853	0.365	404.012	15538	5.361	0.187	0.696	0.345879				1200	Ac-Tub_KAN508-18_6.tif:0012-0582	0.832	19.625	2	52	170.547	93.853	0.365	16.329	628	5.361	0.187	0.696
1181	ARL13B_KAN508-18_6.tif:0013-0587	0.338	348.692	281	417	172.73	94.747	0.341	117.865	4533	6.259	0.16	0.634	0.100905				1201	Ac-Tub_KAN508-18_6.tif:0013-0587	0.338	5.462	0	22	172.73	94.747	0.341	1.846	71	6.259	0.16	0.634
1182	ARL13B_KAN508-18_6.tif:0014-0591	0.26	364.1	304	487	174.215	95.428	0.382	94.672	3641	5.252	0.19	0.588	0.0810494				1202	Ac-Tub_KAN508-18_6.tif:0014-0591	0.26	7.8	0	24	174.215	95.428	0.382	2.028	78	5.252	0.19	0.588
1183	ARL13B_KAN508-18_6.tif:0015-0604	0.286	435.455	319	582	177.06	97.549	0.589	124.547	4790	2.826	0.354	0.733	0.106626				1203	Ac-Tub_KAN508-18_6.tif:0015-0604	0.286	8.364	0	35	177.06	97.549	0.589	2.392	92	2.826	0.354	0.733
1184	ARL13B_KAN508-18_6.tif:0016-0644	0.91	468.314	266	1137	180.284	103.783	0.673	426.192	16391	2.054	0.487	0.787	0.364867				1204	Ac-Tub_KAN508-18_6.tif:0016-0644	0.91	400.8	0	1466	180.284	103.783	0.673	364.75	14028	2.054	0.487	0.787
1185	ARL13B_KAN508-18_6.tif:0017-0770	1.066	755.415	306	1597	27.564	124.188	0.517	805.32	30972	4.053	0.247	0.766	0.689443				1205	Ac-Tub_KAN508-18_6.tif:0017-0770	1.066	583.927	24	2340	27.564	124.188	0.517	622.503	23941	4.053	0.247	0.766
1186	ARL13B_KAN508-18_6.tif:0018-0869	1.196	518.065	267	1122	85.094	140.123	0.651	619.643	23831	2.444	0.409	0.793	0.530483				1206	Ac-Tub_KAN508-18_6.tif:0018-0869	1.196	600.022	41	1360	85.094	140.123	0.651	717.669	27601	2.444	0.409	0.793
1187	ARL13B_KAN508-18_6.tif:0019-0959	1.456	523.25	308	795	63.93	154.639	0.359	761.898	29302	5.502	0.182	0.683	0.652268				1207	Ac-Tub_KAN508-18_6.tif:0019-0959	1.456	828.804	0	2019	63.93	154.639	0.359	1206.81	46413	5.502	0.182	0.683
1188	ARL13B_KAN508-18_6.tif:0020-0992	1.976	648.632	313	1271	167.944	160.062	0.781	1281.77	49296	2.071	0.483	0.905	1.09734				1208	Ac-Tub_KAN508-18_6.tif:0020-0992	1.976	656.039	0	2198	167.944	160.062	0.781	1296.41	49859	2.071	0.483	0.905
										41075.1				0.914341
										44923.2

## Sheet: Exp.2_KAN512
	Label	Area	Mean	Min	Max	X	Y	Circ	IntDen	RawIntDen	AR	Round	Solidity						Label	Area	Mean	Min	Max	X	Y	Circ	IntDen	RawIntDen	AR	Round	Solidity
1135	ARL13B_KAN512-7_1.tif:0001-0204	1.17	347.289	190	543	29.919	32.9	0.444	406.352	15628	5.046	0.198	0.726	0.578878	0.557463	0.413965		1138	Ac-Tub_KAN512-7_1.tif:0001-0204	1.17	838.933	0	1796	29.919	32.9	0.444	981.611	37752	5.046	0.198	0.726
1136	ARL13B_KAN512-7_1.tif:0002-0229	2.106	641.457	193	1479	114.415	36.987	0.794	1350.99	51958	2.033	0.492	0.89	1.92458	1.85338	1.66628		1139	Ac-Tub_KAN512-7_1.tif:0002-0229	2.106	384.963	0	963	114.415	36.987	0.794	810.781	31182	2.033	0.492	0.89
1137	ARL13B_KAN512-7_1.tif:0003-0507	0.338	213.692	194	258	4.695	81.785	0.496	72.232	2778	3.541	0.282	0.65	0.1029	0.0990935	0.686265		1140	Ac-Tub_KAN512-7_1.tif:0003-0507	0.338	311.385	175	487	4.695	81.785	0.496	105.254	4048	3.541	0.282	0.65
1141	ARL13B_KAN512-7_2.tif:0001-0133	0.572	300.636	195	392	198.763	21.439	0.452	171.974	6614	5.173	0.193	0.721	0.24499	0.235927	0.932206		1146	Ac-Tub_KAN512-7_2.tif:0001-0133	0.572	322.5	22	713	198.763	21.439	0.452	184.481	7095	5.173	0.193	0.721
1142	ARL13B_KAN512-7_2.tif:0002-0143	0.832	508.438	202	939	5.835	23.129	0.628	423.045	16270	3.364	0.297	0.865	0.602658	0.580364	0.858032		1147	Ac-Tub_KAN512-7_2.tif:0002-0143	0.832	592.562	35	1388	5.835	23.129	0.628	493.042	18962	3.364	0.297	0.865
1143	ARL13B_KAN512-7_2.tif:0003-0191	1.794	687.826	192	1472	115.87	30.77	0.422	1234.03	47460	5.215	0.192	0.775	1.75797	1.69294	0.853121		1148	Ac-Tub_KAN512-7_2.tif:0003-0191	1.794	806.246	0	3032	115.87	30.77	0.422	1446.49	55631	5.215	0.192	0.775
1144	ARL13B_KAN512-7_2.tif:0004-0284	1.898	818.603	193	1814	181.125	45.949	0.726	1553.8	59758	2.64	0.379	0.924	2.2135	2.13162	1.67634		1149	Ac-Tub_KAN512-7_2.tif:0004-0284	1.898	488.329	0	1368	181.125	45.949	0.726	926.904	35648	2.64	0.379	0.924
1145	ARL13B_KAN512-7_2.tif:0005-0487	1.924	474.905	191	875	186.782	78.524	0.706	913.773	35143	2.539	0.394	0.831	1.30173	1.25358	0.528959		1150	Ac-Tub_KAN512-7_2.tif:0005-0487	1.924	897.811	235	1609	186.782	78.524	0.706	1727.49	66438	2.539	0.394	0.831
1151	ARL13B_KAN512-7_3.tif:0001-0045	1.144	414.75	190	752	167.77	7.249	0.794	474.503	18249	2.235	0.447	0.854	0.675963	0.650957	1.38765		1155	Ac-Tub_KAN512-7_3.tif:0001-0045	1.144	298.886	0	925	167.77	7.249	0.794	341.947	13151	2.235	0.447	0.854
1152	ARL13B_KAN512-7_3.tif:0002-0634	2.158	612.771	190	1544	96.009	102.319	0.673	1322.44	50860	2.82	0.355	0.818	1.88391	1.81422	1.40079		1156	Ac-Tub_KAN512-7_3.tif:0002-0634	2.158	437.446	0	1436	96.009	102.319	0.673	944.065	36308	2.82	0.355	0.818
1153	ARL13B_KAN512-7_3.tif:0003-0692	1.56	521.1	194	1085	188.37	111.617	0.698	812.965	31266	2.916	0.343	0.851	1.15813	1.11528	1.15241		1157	Ac-Tub_KAN512-7_3.tif:0003-0692	1.56	452.183	0	1525	188.37	111.617	0.698	705.448	27131	2.916	0.343	0.851
1154	ARL13B_KAN512-7_3.tif:0004-0879	1.742	1136.46	191	2836	207.828	141.798	0.567	1979.84	76143	3.576	0.28	0.793	2.82042	2.71608	2.54804		1158	Ac-Tub_KAN512-7_3.tif:0004-0879	1.742	446.015	0	1848	207.828	141.798	0.567	777.005	29883	3.576	0.28	0.793
1159	ARL13B_KAN512-7_5.tif:0001-0018	1.56	385.9	204	733	204.358	3.002	0.562	602.04	23154	3.142	0.318	0.741	0.857649	0.825922	0.763654		1163	Ac-Tub_KAN512-7_5.tif:0001-0018	1.56	505.333	0	1589	204.358	3.002	0.562	788.367	30320	3.142	0.318	0.741
1160	ARL13B_KAN512-7_5.tif:0002-0369	0.806	433.387	196	694	143.588	59.592	0.754	349.331	13435	2.253	0.444	0.827	0.497647	0.479237	1.07214		1164	Ac-Tub_KAN512-7_5.tif:0002-0369	0.806	404.226	33	1076	143.588	59.592	0.754	325.826	12531	2.253	0.444	0.827
1161	ARL13B_KAN512-7_5.tif:0003-0645	0.39	247.733	194	320	65.075	104.044	0.674	96.622	3716	2.399	0.417	0.75	0.137645	0.132553	0.38652		1165	Ac-Tub_KAN512-7_5.tif:0003-0645	0.39	640.933	188	1029	65.075	104.044	0.674	249.979	9614	2.399	0.417	0.75
1162	ARL13B_KAN512-7_5.tif:0004-0940	1.534	282	193	388	36.72	151.615	0.579	432.614	16638	2.481	0.403	0.819	0.616289	0.593491	0.791796		1166	Ac-Tub_KAN512-7_5.tif:0004-0940	1.534	356.153	86	808	36.72	151.615	0.579	546.371	21013	2.481	0.403	0.819
1167	ARL13B_KAN512-7_6.tif:0001-0080	0.364	203	171	252	48.317	12.969	0.419	73.896	2842	5.191	0.193	0.7	0.105271	0.101376	1.49658		1175	Ac-Tub_KAN512-7_6.tif:0001-0080	0.364	135.643	75	218	48.317	12.969	0.419	49.377	1899	5.191	0.193	0.7
1168	ARL13B_KAN512-7_6.tif:0002-0181	1.56	566.433	151	1137	64.562	29.098	0.496	883.689	33986	4.47	0.224	0.789	1.25888	1.21231	0.973839		1176	Ac-Tub_KAN512-7_6.tif:0002-0181	1.56	581.65	115	2457	64.562	29.098	0.496	907.429	34899	4.47	0.224	0.789
1169	ARL13B_KAN512-7_6.tif:0003-0304	1.43	631.164	195	1520	81.33	49.021	0.749	902.618	34714	2.151	0.465	0.827	1.28584	1.23828	0.830022		1177	Ac-Tub_KAN512-7_6.tif:0003-0304	1.43	760.418	0	2108	81.33	49.021	0.749	1087.46	41823	2.151	0.465	0.827
1170	ARL13B_KAN512-7_6.tif:0004-0374	0.754	304.345	200	422	86.9	60.383	0.46	229.49	8826	4.198	0.238	0.707	0.326925	0.314831	0.380956		1178	Ac-Tub_KAN512-7_6.tif:0004-0374	0.754	798.897	0	1896	86.9	60.383	0.46	602.404	23168	4.198	0.238	0.707
1171	ARL13B_KAN512-7_6.tif:0005-0528	0.832	230.281	61	497	85.463	85.155	0.41	191.606	7369	5.526	0.181	0.744	0.272956	0.262858	0.567108		1179	Ac-Tub_KAN512-7_6.tif:0005-0528	0.832	406.062	0	1469	85.463	85.155	0.41	337.864	12994	5.526	0.181	0.744
1172	ARL13B_KAN512-7_6.tif:0006-0538	0.494	332.421	126	728	84.593	86.884	0.725	164.226	6316	2.325	0.43	0.76	0.233951	0.225297	2.49349		1180	Ac-Tub_KAN512-7_6.tif:0006-0538	0.494	133.316	1	329	84.593	86.884	0.725	65.862	2533	2.325	0.43	0.76
1173	ARL13B_KAN512-7_6.tif:0007-0645	1.612	498.645	192	1636	91.169	104.027	0.461	803.864	30916	3.81	0.262	0.752	1.14516	1.1028	0.693308		1181	Ac-Tub_KAN512-7_6.tif:0007-0645	1.612	719.226	7	3124	91.169	104.027	0.461	1159.46	44592	3.81	0.262	0.752
1174	ARL13B_KAN512-7_6.tif:0008-0906	0.416	244.5	195	302	3.175	146.103	0.27	101.718	3912	7.63	0.131	0.615	0.144905	0.139544	0.500512		1182	Ac-Tub_KAN512-7_6.tif:0008-0906	0.416	488.5	75	958	3.175	146.103	0.27	203.228	7816	7.63	0.131	0.615
										24914.6				0.922865	0.888725	1.04392
1183	ARL13B_KAN512-8_1.tif:0001-0180	1.742	414.149	44	890	112.751	29.084	0.589	721.491	27748	2.913	0.343	0.817	1.02782	0.989794	0.835582		1189	Ac-Tub_KAN512-8_1.tif:0001-0180	1.742	495.642	8	1523	112.751	29.084	0.589	863.46	33208	2.913	0.343	0.817
1184	ARL13B_KAN512-8_1.tif:0002-0237	2.21	426.2	196	826	80.157	38.344	0.761	941.959	36227	2.162	0.462	0.881	1.34189	1.29225	0.97747		1190	Ac-Tub_KAN512-8_1.tif:0002-0237	2.21	436.024	62	862	80.157	38.344	0.761	963.67	37062	2.162	0.462	0.881
1185	ARL13B_KAN512-8_1.tif:0003-0509	0.754	258.276	182	363	31.346	82.118	0.353	194.752	7490	4.918	0.203	0.682	0.277438	0.267174	0.245196		1191	Ac-Tub_KAN512-8_1.tif:0003-0509	0.754	1053.35	376	1809	31.346	82.118	0.353	794.27	30547	4.918	0.203	0.682
1186	ARL13B_KAN512-8_1.tif:0004-0657	0.91	322.514	192	633	178.124	105.925	0.524	293.506	11288	3.634	0.275	0.761	0.41812	0.402652	0.299607		1192	Ac-Tub_KAN512-8_1.tif:0004-0657	0.91	1076.46	588	1744	178.124	105.925	0.524	979.635	37676	3.634	0.275	0.761
1187	ARL13B_KAN512-8_1.tif:0005-0665	1.118	329.535	194	533	72.429	107.192	0.633	368.442	14170	3.08	0.325	0.811	0.524872	0.505455	0.602287		1193	Ac-Tub_KAN512-8_1.tif:0005-0665	1.118	547.14	68	1074	72.429	107.192	0.633	611.739	23527	3.08	0.325	0.811
1188	ARL13B_KAN512-8_1.tif:0006-0697	1.144	271.636	187	452	118.379	112.399	0.747	310.771	11952	2.045	0.489	0.772	0.442715	0.426338	0.382354		1194	Ac-Tub_KAN512-8_1.tif:0006-0697	1.144	710.432	46	1425	118.379	112.399	0.747	812.783	31259	2.045	0.489	0.772
1195	ARL13B_KAN512-8_2.tif:0001-0013	1.04	624.1	213	1306	22.756	2.141	0.784	649.103	24964	2.196	0.455	0.899	0.924693	0.890486	1.87883		1204	Ac-Tub_KAN512-8_2.tif:0001-0013	1.04	332.175	0	1347	22.756	2.141	0.784	345.483	13287	2.196	0.455	0.899
1196	ARL13B_KAN512-8_2.tif:0002-0273	2.236	628.407	200	1418	138.776	44.113	0.468	1405.2	54043	4.51	0.222	0.8	2.00181	1.92776	0.971594		1205	Ac-Tub_KAN512-8_2.tif:0002-0273	2.236	646.779	0	1722	138.776	44.113	0.468	1446.29	55623	4.51	0.222	0.8
1197	ARL13B_KAN512-8_2.tif:0003-0360	2.366	695.538	190	1678	184.423	58.023	0.65	1645.74	63294	3.055	0.327	0.843	2.34448	2.25775	2.91745		1206	Ac-Tub_KAN512-8_2.tif:0003-0360	2.366	238.407	0	1369	184.423	58.023	0.65	564.104	21695	3.055	0.327	0.843
1198	ARL13B_KAN512-8_2.tif:0004-0433	0.338	219.769	190	254	167.669	69.84	0.697	74.286	2857	1.972	0.507	0.743	0.105826	0.101911	114.28		1207	Ac-Tub_KAN512-8_2.tif:0004-0433	0.338	1.923	0	11	167.669	69.84	0.697	0.65	25	1.972	0.507	0.743
1199	ARL13B_KAN512-8_2.tif:0005-0492	0.312	218.167	186	266	86.9	79.268	0.597	68.072	2618	2.678	0.373	0.667	0.0969735	0.0933862	35.3784		1208	Ac-Tub_KAN512-8_2.tif:0005-0492	0.312	6.167	0	24	86.9	79.268	0.597	1.924	74	2.678	0.373	0.667
1200	ARL13B_KAN512-8_2.tif:0006-0495	0.312	221.917	192	286	109.395	79.819	0.719	69.242	2663	2.033	0.492	0.828	0.0986404	0.0949914	4.78957		1209	Ac-Tub_KAN512-8_2.tif:0006-0495	0.312	46.333	0	132	109.395	79.819	0.719	14.457	556	2.033	0.492	0.828
1201	ARL13B_KAN512-8_2.tif:0007-0857	1.612	574.806	153	1099	110.357	138.23	0.692	926.644	35638	2.631	0.38	0.867	1.32007	1.27124	0.945832		1210	Ac-Tub_KAN512-8_2.tif:0007-0857	1.612	607.726	0	2383	110.357	138.23	0.692	979.713	37679	2.631	0.38	0.867
1202	ARL13B_KAN512-8_2.tif:0008-0932	0.676	395.192	200	581	184.606	150.44	0.43	267.166	10275	4.193	0.239	0.703	0.380597	0.366518	8.49174		1211	Ac-Tub_KAN512-8_2.tif:0008-0932	0.676	46.538	0	207	184.606	150.44	0.43	31.462	1210	4.193	0.239	0.703
1203	ARL13B_KAN512-8_2.tif:0009-0971	1.118	405.884	163	713	220.622	156.568	0.629	453.805	17453	3.117	0.321	0.86	0.646478	0.622563	2.02471		1212	Ac-Tub_KAN512-8_2.tif:0009-0971	1.118	200.465	0	432	220.622	156.568	0.629	224.133	8620	3.117	0.321	0.86
1213	ARL13B_KAN512-8_3.tif:0001-0297	1.196	488.348	124	976	187.299	48.067	0.73	584.099	22464	1.884	0.531	0.844	0.832091	0.801309	53.4857		1217	Ac-Tub_KAN512-8_3.tif:0001-0297	1.196	9.13	0	67	187.299	48.067	0.73	10.921	420	1.884	0.531	0.844
1214	ARL13B_KAN512-8_3.tif:0002-0358	1.43	526.145	202	1082	187.008	57.738	0.596	752.433	28938	2.508	0.399	0.748	1.07189	1.03224	1.57915		1218	Ac-Tub_KAN512-8_3.tif:0002-0358	1.43	333.182	0	1907	187.008	57.738	0.596	476.479	18325	2.508	0.399	0.748
1215	ARL13B_KAN512-8_3.tif:0003-0774	1.976	431.355	198	829	197.217	124.871	0.295	852.409	32783	7.565	0.132	0.691	1.21432	1.1694	3.39228		1219	Ac-Tub_KAN512-8_3.tif:0003-0774	1.976	127.158	0	581	197.217	124.871	0.295	251.279	9664	7.565	0.132	0.691
1216	ARL13B_KAN512-8_3.tif:0004-0777	2.106	291.123	150	518	201.112	125.298	0.473	613.143	23581	4.868	0.205	0.802	0.873466	0.841153	0.614985		1220	Ac-Tub_KAN512-8_3.tif:0004-0777	2.106	473.383	0	1441	201.112	125.298	0.473	997.004	38344	4.868	0.205	0.802
1221	ARL13B_KAN512-8_4.tif:0001-0030	0.65	253.72	35	409	206.687	4.937	0.26	164.928	6343	8.642	0.116	0.617	0.234952	0.22626	1.13531		1223	Ac-Tub_KAN512-8_4.tif:0001-0030	0.65	223.48	1	629	206.687	4.937	0.26	145.271	5587	8.642	0.116	0.617
1222	ARL13B_KAN512-8_4.tif:0002-0092	1.846	748.465	168	2144	194.821	14.836	0.696	1381.75	53141	2.197	0.455	0.816	1.9684	1.89558	1.36961		1224	Ac-Tub_KAN512-8_4.tif:0002-0092	1.846	546.479	0	2698	194.821	14.836	0.696	1008.86	38800	2.197	0.455	0.816
1225	ARL13B_KAN512-8_5.tif:0001-0420	0.624	305.458	197	445	71.541	67.846	0.56	190.617	7331	3.672	0.272	0.738	0.271548	0.261503	2.301		1232	Ac-Tub_KAN512-8_5.tif:0001-0420	0.624	132.75	0	514	71.541	67.846	0.56	82.841	3186	3.672	0.272	0.738
1226	ARL13B_KAN512-8_5.tif:0002-0498	1.872	419.236	191	888	116.001	80.287	0.466	784.857	30185	4.556	0.22	0.783	1.11808	1.07672	0.981211		1233	Ac-Tub_KAN512-8_5.tif:0002-0498	1.872	427.264	0	2451	116.001	80.287	0.466	799.886	30763	4.556	0.22	0.783
1227	ARL13B_KAN512-8_5.tif:0003-0506	0.832	481.406	195	777	106.183	81.673	0.633	400.554	15405	3.186	0.314	0.771	0.570618	0.549509	4.37394		1234	Ac-Tub_KAN512-8_5.tif:0003-0506	0.832	110.062	0	548	106.183	81.673	0.633	91.578	3522	3.186	0.314	0.771
1228	ARL13B_KAN512-8_5.tif:0004-0624	0.988	368.5	116	917	181.699	100.718	0.699	364.1	14003	2.512	0.398	0.835	0.518686	0.499498	0.58639		1235	Ac-Tub_KAN512-8_5.tif:0004-0624	0.988	628.421	11	2196	181.699	100.718	0.699	620.917	23880	2.512	0.398	0.835
1229	ARL13B_KAN512-8_5.tif:0005-0712	0.884	260.029	69	499	195.61	114.838	0.436	229.88	8841	5.457	0.183	0.773	0.32748	0.315366	267.909		1236	Ac-Tub_KAN512-8_5.tif:0005-0712	0.884	0.971	0	9	195.61	114.838	0.436	0.858	33	5.457	0.183	0.773
1230	ARL13B_KAN512-8_5.tif:0006-0797	0.572	292.409	195	468	43.581	128.443	0.576	167.268	6433	2.534	0.395	0.8	0.238285	0.22947	0.726646		1237	Ac-Tub_KAN512-8_5.tif:0006-0797	0.572	402.409	39	1149	43.581	128.443	0.576	230.192	8853	2.534	0.395	0.8
1231	ARL13B_KAN512-8_5.tif:0007-0813	0.936	307.667	135	511	100.221	131.141	0.331	287.993	11076	5.936	0.168	0.643	0.410267	0.39509	1.04451		1238	Ac-Tub_KAN512-8_5.tif:0007-0813	0.936	294.556	0	940	100.221	131.141	0.331	275.721	10604	5.936	0.168	0.643
1239	ARL13B_KAN512-8_6.tif:0001-0150	2.08	999.85	195	2356	183.035	24.323	0.749	2079.81	79988	2.145	0.466	0.851	2.96284	2.85324	1.14429		1248	Ac-Tub_KAN512-8_6.tif:0001-0150	2.08	873.775	0	2677	183.035	24.323	0.749	1817.56	69902	2.145	0.466	0.851
1240	ARL13B_KAN512-8_6.tif:0002-0155	1.56	368.9	202	589	13.94	25.061	0.774	575.519	22134	2.04	0.49	0.857	0.819867	0.789538	0.627381		1249	Ac-Tub_KAN512-8_6.tif:0002-0155	1.56	588	185	1024	13.94	25.061	0.774	917.335	35280	2.04	0.49	0.857
1241	ARL13B_KAN512-8_6.tif:0003-0195	1.664	741.734	179	2162	124.974	31.366	0.616	1234.32	47471	2.925	0.342	0.853	1.75838	1.69333	0.813389		1250	Ac-Tub_KAN512-8_6.tif:0003-0195	1.664	911.906	0	3428	124.974	31.366	0.616	1517.5	58362	2.925	0.342	0.853
1242	ARL13B_KAN512-8_6.tif:0004-0451	0.91	304.657	190	486	198.814	72.639	0.661	277.255	10663	2.292	0.436	0.795	0.394969	0.380358	0.472441		1251	Ac-Tub_KAN512-8_6.tif:0004-0451	0.91	644.857	235	1004	198.814	72.639	0.661	586.855	22570	2.292	0.436	0.795
1243	ARL13B_KAN512-8_6.tif:0005-0641	1.716	695.439	195	1527	61.319	103.369	0.752	1193.45	45899	2.088	0.479	0.846	1.70015	1.63725	1.0578		1252	Ac-Tub_KAN512-8_6.tif:0005-0641	1.716	657.439	40	1519	61.319	103.369	0.752	1128.23	43391	2.088	0.479	0.846
1244	ARL13B_KAN512-8_6.tif:0006-0716	0.416	195.062	60	270	107.403	115.395	0.429	81.151	3121	4.766	0.21	0.889	0.115605	0.111329	1.21819		1253	Ac-Tub_KAN512-8_6.tif:0006-0716	0.416	160.125	0	398	107.403	115.395	0.429	66.616	2562	4.766	0.21	0.889
1245	ARL13B_KAN512-8_6.tif:0007-0735	1.456	461.982	192	887	62.188	118.599	0.447	672.687	25871	4.166	0.24	0.718	0.95829	0.922839	1.25192		1254	Ac-Tub_KAN512-8_6.tif:0007-0735	1.456	369.018	0	1892	62.188	118.599	0.447	537.322	20665	4.166	0.24	0.718
1246	ARL13B_KAN512-8_6.tif:0008-0847	1.456	337.75	200	687	152.217	136.585	0.383	491.794	18914	5.227	0.191	0.709	0.700595	0.674678	0.767458		1255	Ac-Tub_KAN512-8_6.tif:0008-0847	1.456	440.089	0	1489	152.217	136.585	0.383	640.809	24645	5.227	0.191	0.709
1247	ARL13B_KAN512-8_6.tif:0009-0853	0.624	264.292	191	415	57.855	137.708	0.517	164.928	6343	2.859	0.35	0.706	0.234952	0.22626	0.869619		1256	Ac-Tub_KAN512-8_6.tif:0009-0853	0.624	303.917	47	696	57.855	137.708	0.517	189.655	7294	2.859	0.35	0.706
										22800.2				0.844545	0.813302	14.1282
1257	ARL13B_KAN512-9_1.tif:0001-0016	1.04	373.725	195	825	223.126	2.6	0.662	388.697	14949	2.959	0.338	0.8	0.553727	0.533243	1.30172		1265	Ac-Tub_KAN512-9_1.tif:0001-0016	1.04	287.1	0	880	223.126	2.6	0.662	298.602	11484	2.959	0.338	0.8
1258	ARL13B_KAN512-9_1.tif:0002-0164	0.338	203.769	143	254	64.618	26.464	0.697	68.878	2649	1.413	0.708	0.722	0.0981218	0.094492	73.5833		1266	Ac-Tub_KAN512-9_1.tif:0002-0164	0.338	2.769	0	16	64.618	26.464	0.697	0.936	36	1.413	0.708	0.722
1259	ARL13B_KAN512-9_1.tif:0003-0306	1.196	463.087	181	821	28.489	49.357	0.568	553.885	21302	3.323	0.301	0.929	0.789049	0.75986	0.608333		1267	Ac-Tub_KAN512-9_1.tif:0003-0306	1.196	761.239	19	2067	28.489	49.357	0.568	910.497	35017	3.323	0.301	0.929
1260	ARL13B_KAN512-9_1.tif:0004-0595	1.456	422.911	190	810	93.174	96.03	0.629	615.795	23683	3.013	0.332	0.794	0.877244	0.844792	0.441501		1268	Ac-Tub_KAN512-9_1.tif:0004-0595	1.456	957.893	159	2416	93.174	96.03	0.629	1394.78	53642	3.013	0.332	0.794
1261	ARL13B_KAN512-9_1.tif:0005-0617	2.938	755.522	164	1914	199.745	99.471	0.524	2219.86	85374	3.336	0.3	0.771	3.16234	3.04536	0.592381		1269	Ac-Tub_KAN512-9_1.tif:0005-0617	2.938	1275.4	0	2671	199.745	99.471	0.524	3747.35	144120	3.336	0.3	0.771
1262	ARL13B_KAN512-9_1.tif:0006-0734	0.52	224.8	188	299	45.779	118.333	0.572	116.903	4496	3.199	0.313	0.727	0.166537	0.160376	0.837712		1270	Ac-Tub_KAN512-9_1.tif:0006-0734	0.52	268.35	76	485	45.779	118.333	0.572	139.55	5367	3.199	0.313	0.727
1263	ARL13B_KAN512-9_1.tif:0007-1025	1.274	422.469	191	908	34.871	165.382	0.646	538.258	20701	3.08	0.325	0.803	0.766787	0.738421	1.09785		1271	Ac-Tub_KAN512-9_1.tif:0007-1025	1.274	384.816	53	915	34.871	165.382	0.646	490.286	18856	3.08	0.325	0.803
1264	ARL13B_KAN512-9_1.tif:0008-1032	0.832	285.906	190	415	92.215	166.486	0.69	237.888	9149	2.715	0.368	0.831	0.338889	0.326352	0.435004		1272	Ac-Tub_KAN512-9_1.tif:0008-1032	0.832	657.25	106	1129	92.215	166.486	0.69	546.865	21032	2.715	0.368	0.831
1273	ARL13B_KAN512-9_2.tif:0001-0048	2.678	821.961	170	2213	167.001	7.89	0.667	2201.34	84662	2.625	0.381	0.862	3.13597	3.01996	1.25494		1278	Ac-Tub_KAN512-9_2.tif:0001-0048	2.678	654.981	0	2089	167.001	7.89	0.667	1754.14	67463	2.625	0.381	0.862
1274	ARL13B_KAN512-9_2.tif:0002-0243	2.106	567.235	196	1163	59.331	39.201	0.643	1194.67	45946	3.017	0.332	0.857	1.70189	1.63893	1.37728		1279	Ac-Tub_KAN512-9_2.tif:0002-0243	2.106	411.852	9	998	59.331	39.201	0.643	867.412	33360	3.017	0.332	0.857
1275	ARL13B_KAN512-9_2.tif:0003-0302	1.794	248.957	158	355	155.208	48.771	0.733	446.655	17178	2.125	0.471	0.852	0.636292	0.612753	0.567755		1280	Ac-Tub_KAN512-9_2.tif:0003-0302	1.794	438.493	0	1024	155.208	48.771	0.733	786.703	30256	2.125	0.471	0.852
1276	ARL13B_KAN512-9_2.tif:0004-0803	1.04	400.925	190	708	120.426	129.56	0.449	416.987	16037	4.85	0.206	0.734	0.594028	0.572053	3.04365		1281	Ac-Tub_KAN512-9_2.tif:0004-0803	1.04	131.725	0	639	120.426	129.56	0.449	137.002	5269	4.85	0.206	0.734
1277	ARL13B_KAN512-9_2.tif:0005-0967	1.456	697.321	201	1635	187.586	155.989	0.62	1015.36	39050	3.111	0.321	0.8	1.44645	1.39295	3.84653		1282	Ac-Tub_KAN512-9_2.tif:0005-0967	1.456	181.286	0	1156	187.586	155.989	0.62	263.968	10152	3.111	0.321	0.8
1283	ARL13B_KAN512-9_3.tif:0001-0016	2.366	640.231	191	1481	39.468	2.444	0.647	1514.88	58261	2.489	0.402	0.879	2.15805	2.07822	0.773133		1287	Ac-Tub_KAN512-9_3.tif:0001-0016	2.366	828.099	0	3123	39.468	2.444	0.647	1959.4	75357	2.489	0.402	0.879
1284	ARL13B_KAN512-9_3.tif:0002-0435	0.468	390.833	206	824	22.441	70.153	0.591	182.921	7035	2.885	0.347	0.655	0.260584	0.250944	1.19096		1288	Ac-Tub_KAN512-9_3.tif:0002-0435	0.468	328.167	144	559	22.441	70.153	0.591	153.591	5907	2.885	0.347	0.655
1285	ARL13B_KAN512-9_3.tif:0003-0878	0.546	317.143	192	473	63.982	141.735	0.527	173.17	6660	3.437	0.291	0.712	0.246694	0.237568	1.76564		1289	Ac-Tub_KAN512-9_3.tif:0003-0878	0.546	179.619	0	604	63.982	141.735	0.527	98.078	3772	3.437	0.291	0.712
1286	ARL13B_KAN512-9_3.tif:0004-1016	0.936	286.889	192	406	167.203	163.803	0.498	268.544	10328	3.785	0.264	0.783	0.38256	0.368408	1.22008		1290	Ac-Tub_KAN512-9_3.tif:0004-1016	0.936	235.139	0	700	167.203	163.803	0.498	220.103	8465	3.785	0.264	0.783
1291	ARL13B_KAN512-9_5.tif:0001-0420	0.416	211.438	193	238	105.508	67.745	0.443	87.963	3383	4.452	0.225	0.667	0.12531	0.120674	1.52182		1295	Ac-Tub_KAN512-9_5.tif:0001-0420	0.416	138.938	16	377	105.508	67.745	0.443	57.801	2223	4.452	0.225	0.667
1292	ARL13B_KAN512-9_5.tif:0002-0626	1.352	593.673	193	1204	77.936	101.029	0.708	802.694	30871	2.22	0.45	0.825	1.1435	1.10119	2.14889		1296	Ac-Tub_KAN512-9_5.tif:0002-0626	1.352	276.269	0	883	77.936	101.029	0.708	373.538	14366	2.22	0.45	0.825
1293	ARL13B_KAN512-9_5.tif:0003-0786	1.144	644.545	209	1244	129.85	126.819	0.698	737.404	28360	2.619	0.382	0.854	1.05048	1.01162	2.90276		1297	Ac-Tub_KAN512-9_5.tif:0003-0786	1.144	222.045	0	1225	129.85	126.819	0.698	254.035	9770	2.619	0.382	0.854
1294	ARL13B_KAN512-9_5.tif:0004-0812	1.586	345.869	193	549	112.591	130.913	0.457	548.581	21098	4.143	0.241	0.808	0.781493	0.752583	0.525702		1298	Ac-Tub_KAN512-9_5.tif:0004-0812	1.586	657.918	0	2202	112.591	130.913	0.457	1043.52	40133	4.143	0.241	0.808
1299	ARL13B_KAN512-9_6.tif:0001-0165	2.002	521.325	181	1360	81.554	26.655	0.657	1043.76	40142	3.004	0.333	0.86	1.4869	1.4319	1.18263		1304	Ac-Tub_KAN512-9_6.tif:0001-0165	2.002	440.818	0	1419	81.554	26.655	0.657	882.571	33943	3.004	0.333	0.86
1300	ARL13B_KAN512-9_6.tif:0002-0271	0.442	291.412	162	402	172.59	43.732	0.573	128.812	4954	3.242	0.308	0.756	0.183501	0.176713	0.6521		1305	Ac-Tub_KAN512-9_6.tif:0002-0271	0.442	446.882	129	1103	172.59	43.732	0.573	197.534	7597	3.242	0.308	0.756
1301	ARL13B_KAN512-9_6.tif:0003-0743	1.43	279.491	191	393	184.351	119.948	0.709	399.696	15372	1.898	0.527	0.803	0.569395	0.548332	0.766454		1306	Ac-Tub_KAN512-9_6.tif:0003-0743	1.43	364.655	86	787	184.351	119.948	0.709	521.487	20056	1.898	0.527	0.803
1302	ARL13B_KAN512-9_6.tif:0004-0810	1.17	398.356	191	877	104.341	130.639	0.758	466.104	17926	2.426	0.412	0.909	0.663998	0.639435	0.672242		1307	Ac-Tub_KAN512-9_6.tif:0004-0810	1.17	592.578	86	1305	104.341	130.639	0.758	693.358	26666	2.426	0.412	0.909
1303	ARL13B_KAN512-9_6.tif:0005-0961	0.65	223.8	162	282	26.951	155.081	0.407	145.479	5595	4.826	0.207	0.641	0.207245	0.199578	0.375781		1308	Ac-Tub_KAN512-9_6.tif:0005-0961	0.65	595.56	279	1056	26.951	155.081	0.407	387.137	14889	4.826	0.207	0.641
										24429.3				0.904886	0.871412	4.02639
1	ARL13B_KAN512-10_1.tif:0001-0067	0.468	311.167	198	526	106.156	10.741	0.645	145.635	5601	2.547	0.393	0.783	0.207467	0.199792	0.616307		10	Ac-Tub_KAN512-10_1.tif:0001-0067	0.468	504.889	265	745	106.156	10.741	0.645	236.302	9088	2.547	0.393	0.783
2	ARL13B_KAN512-10_1.tif:0002-0190	2.21	1007.67	192	2411	70.731	30.678	0.496	2227.09	85652	4.208	0.238	0.769	3.17264	3.05528	2.54138		11	Ac-Tub_KAN512-10_1.tif:0002-0190	2.21	396.506	0	2044	70.731	30.678	0.496	876.331	33703	4.208	0.238	0.769
3	ARL13B_KAN512-10_1.tif:0003-0288	2.392	821.533	191	2003	102.627	46.607	0.548	1965.22	75581	3.24	0.309	0.78	2.7996	2.69604	1.1519		12	Ac-Tub_KAN512-10_1.tif:0003-0288	2.392	713.196	0	1847	102.627	46.607	0.548	1706.07	65614	3.24	0.309	0.78
4	ARL13B_KAN512-10_1.tif:0004-0354	0.52	303.35	216	495	66.524	57.187	0.764	157.751	6067	2.411	0.415	0.8	0.224728	0.216415	0.279779		13	Ac-Tub_KAN512-10_1.tif:0004-0354	0.52	1084.25	276	1798	66.524	57.187	0.764	563.844	21685	2.411	0.415	0.8
5	ARL13B_KAN512-10_1.tif:0005-0362	1.092	276.738	190	419	64.488	58.326	0.325	302.216	11623	6.894	0.145	0.689	0.430528	0.414602	0.396446		14	Ac-Tub_KAN512-10_1.tif:0005-0362	1.092	698.048	171	1145	64.488	58.326	0.325	762.314	29318	6.894	0.145	0.689
6	ARL13B_KAN512-10_1.tif:0006-0559	2.288	510.102	208	967	211.85	90.124	0.71	1167.18	44889	2.545	0.393	0.893	1.66274	1.60123	1.2702		15	Ac-Tub_KAN512-10_1.tif:0006-0559	2.288	401.591	0	1259	211.85	90.124	0.71	918.895	35340	2.545	0.393	0.893
7	ARL13B_KAN512-10_1.tif:0007-0620	0.468	241.333	191	314	160.614	99.993	0.785	112.951	4344	1.853	0.54	0.75	0.160906	0.154954	0.716595		16	Ac-Tub_KAN512-10_1.tif:0007-0620	0.468	336.778	0	1031	160.614	99.993	0.785	157.621	6062	1.853	0.54	0.75
8	ARL13B_KAN512-10_1.tif:0008-0756	0.91	431.114	192	779	98.752	121.944	0.537	392.338	15089	3.615	0.277	0.7	0.558913	0.538237	1.81097		17	Ac-Tub_KAN512-10_1.tif:0008-0756	0.91	238.057	0	952	98.752	121.944	0.537	216.645	8332	3.615	0.277	0.7
9	ARL13B_KAN512-10_1.tif:0009-0910	2.626	449.772	194	937	168.815	146.871	0.61	1181.17	45427	3.14	0.319	0.798	1.68266	1.62042	0.912189		18	Ac-Tub_KAN512-10_1.tif:0009-0910	2.626	493.069	0	1464	168.815	146.871	0.61	1294.88	49800	3.14	0.319	0.798
19	ARL13B_KAN512-10_2.tif:0001-0236	1.69	372.077	191	661	3.256	38.126	0.796	628.848	24185	2.097	0.477	0.867	0.895838	0.862699	1.14648		27	Ac-Tub_KAN512-10_2.tif:0001-0236	1.69	324.538	101	561	3.256	38.126	0.796	548.503	21095	2.097	0.477	0.867
20	ARL13B_KAN512-10_2.tif:0002-0367	2.106	688.827	190	1637	148.455	59.283	0.542	1450.76	55795	3.891	0.257	0.779	2.06671	1.99025	1.44468		28	Ac-Tub_KAN512-10_2.tif:0002-0367	2.106	476.802	0	2030	148.455	59.283	0.542	1004.21	38621	3.891	0.257	0.779
21	ARL13B_KAN512-10_2.tif:0003-0531	0.598	234.13	190	304	69.404	85.718	0.577	140.018	5385	3.167	0.316	0.73	0.199466	0.192087	0.794014		29	Ac-Tub_KAN512-10_2.tif:0003-0531	0.598	294.87	63	488	69.404	85.718	0.577	176.343	6782	3.167	0.316	0.73
22	ARL13B_KAN512-10_2.tif:0004-0613	0.728	452.357	196	994	117.983	98.875	0.592	329.336	12666	3.49	0.287	0.737	0.469162	0.451806	2.66484		30	Ac-Tub_KAN512-10_2.tif:0004-0613	0.728	169.75	20	469	117.983	98.875	0.592	123.585	4753	3.49	0.287	0.737
23	ARL13B_KAN512-10_2.tif:0005-0615	2.366	497.637	190	967	139.693	99.244	0.681	1177.48	45285	2.584	0.387	0.897	1.67741	1.61535	1.21724		31	Ac-Tub_KAN512-10_2.tif:0005-0615	2.366	408.824	0	1037	139.693	99.244	0.681	967.336	37203	2.584	0.387	0.897
24	ARL13B_KAN512-10_2.tif:0006-0657	0.988	541.526	190	1308	82.577	106.039	0.583	535.06	20578	3.234	0.309	0.724	0.762231	0.734034	1.7835		32	Ac-Tub_KAN512-10_2.tif:0006-0657	0.988	303.632	0	1143	82.577	106.039	0.583	300.006	11538	3.234	0.309	0.724
25	ARL13B_KAN512-10_2.tif:0007-0851	1.456	391.161	193	786	37.252	137.362	0.651	569.564	21905	3.01	0.332	0.789	0.811385	0.781369	1.40444		33	Ac-Tub_KAN512-10_2.tif:0007-0851	1.456	278.518	19	907	37.252	137.362	0.651	405.546	15597	3.01	0.332	0.789
26	ARL13B_KAN512-10_2.tif:0008-0862	0.52	283.9	198	376	113.657	138.973	0.368	147.637	5678	4.539	0.22	0.645	0.210319	0.202539	0.513289		34	Ac-Tub_KAN512-10_2.tif:0008-0862	0.52	553.1	42	972	113.657	138.973	0.368	287.629	11062	4.539	0.22	0.645
35	ARL13B_KAN512-10_3.tif:0001-0050	1.43	309.382	133	688	6.903	8.111	0.379	442.443	17016	5.764	0.173	0.859	0.630291	0.606974	0.622681		42	Ac-Tub_KAN512-10_3.tif:0001-0050	1.43	496.855	35	1636	6.903	8.111	0.379	710.545	27327	5.764	0.173	0.859
36	ARL13B_KAN512-10_3.tif:0002-0089	1.066	414	123	821	5.469	14.483	0.754	441.351	16974	2.16	0.463	0.882	0.628735	0.605476	0.624182		43	Ac-Tub_KAN512-10_3.tif:0002-0089	1.066	663.268	18	1785	5.469	14.483	0.754	707.087	27194	2.16	0.463	0.882
37	ARL13B_KAN512-10_3.tif:0003-0253	2.444	763.532	199	1788	167.894	40.808	0.485	1866.18	71772	4.105	0.244	0.774	2.65851	2.56017	0.879096		44	Ac-Tub_KAN512-10_3.tif:0003-0253	2.444	868.543	0	2423	167.894	40.808	0.485	2122.85	81643	4.105	0.244	0.774
38	ARL13B_KAN512-10_3.tif:0004-0415	1.924	455.824	191	855	25.787	66.871	0.73	877.059	33731	2.591	0.386	0.865	1.24943	1.20321	1.23706		45	Ac-Tub_KAN512-10_3.tif:0004-0415	1.924	368.473	102	805	25.787	66.871	0.73	708.985	27267	2.591	0.386	0.865
39	ARL13B_KAN512-10_3.tif:0005-0531	1.248	491.854	195	896	169.323	85.657	0.664	613.871	23609	2.924	0.342	0.865	0.874503	0.842152	0.961474		46	Ac-Tub_KAN512-10_3.tif:0005-0531	1.248	511.562	8	1509	169.323	85.657	0.664	638.468	24555	2.924	0.342	0.865
40	ARL13B_KAN512-10_3.tif:0006-0578	1.612	433.516	190	958	138.61	93.255	0.525	698.87	26878	4.023	0.249	0.775	0.99559	0.95876	0.80931		47	Ac-Tub_KAN512-10_3.tif:0006-0578	1.612	535.661	35	2374	138.61	93.255	0.525	863.538	33211	4.023	0.249	0.775
41	ARL13B_KAN512-10_3.tif:0007-0608	0.936	356.944	195	597	112.364	98.036	0.606	334.12	12850	3.295	0.303	0.878	0.475978	0.45837	1.10509		48	Ac-Tub_KAN512-10_3.tif:0007-0608	0.936	323	0	1091	112.364	98.036	0.606	302.346	11628	3.295	0.303	0.878
49	ARL13B_KAN512-10_4.tif:0001-0137	1.118	527.209	173	1140	30.714	22.131	0.619	589.455	22670	3.391	0.295	0.851	0.839721	0.808657	1.12456		58	Ac-Tub_KAN512-10_4.tif:0001-0137	1.118	468.814	0	1802	30.714	22.131	0.619	524.166	20159	3.391	0.295	0.851
50	ARL13B_KAN512-10_4.tif:0002-0234	1.066	515.39	190	1241	176.626	37.679	0.614	549.439	21131	2.412	0.415	0.745	0.782715	0.75376	2.02618		59	Ac-Tub_KAN512-10_4.tif:0002-0234	1.066	254.366	0	1646	176.626	37.679	0.614	271.17	10429	2.412	0.415	0.745
51	ARL13B_KAN512-10_4.tif:0003-0352	1.352	497.846	201	940	44.167	56.803	0.671	673.129	25888	2.459	0.407	0.776	0.958919	0.923446	0.469922		60	Ac-Tub_KAN512-10_4.tif:0003-0352	1.352	1059.42	297	2268	44.167	56.803	0.671	1432.43	55090	2.459	0.407	0.776
52	ARL13B_KAN512-10_4.tif:0004-0422	1.014	336.41	199	646	94.164	68.194	0.339	341.141	13120	5.966	0.168	0.729	0.485979	0.468001	0.583994		61	Ac-Tub_KAN512-10_4.tif:0004-0422	1.014	576.051	190	1841	94.164	68.194	0.339	584.151	22466	5.966	0.168	0.729
53	ARL13B_KAN512-10_4.tif:0005-0657	2.834	756.45	191	1911	165.896	106.02	0.775	2143.91	82453	2.149	0.465	0.905	3.05415	2.94117	1.74726		62	Ac-Tub_KAN512-10_4.tif:0005-0657	2.834	432.936	0	1230	165.896	106.02	0.775	1227.01	47190	2.149	0.465	0.905
54	ARL13B_KAN512-10_4.tif:0006-0810	1.716	371.667	177	957	16.413	130.644	0.711	637.818	24530	2.545	0.393	0.898	0.908618	0.875005	0.502715		63	Ac-Tub_KAN512-10_4.tif:0006-0810	1.716	739.318	0	2808	16.413	130.644	0.711	1268.75	48795	2.545	0.393	0.898
55	ARL13B_KAN512-10_4.tif:0007-0900	1.274	451.143	196	799	191.514	145.1	0.797	574.791	22106	2.109	0.474	0.86	0.81883	0.788539	1.2241		64	Ac-Tub_KAN512-10_4.tif:0007-0900	1.274	368.551	12	913	191.514	145.1	0.797	469.562	18059	2.109	0.474	0.86
56	ARL13B_KAN512-10_4.tif:0008-0967	0.728	347.357	192	513	76.052	156.032	0.475	252.891	9726	3.498	0.286	0.683	0.360261	0.346934	0.759606		65	Ac-Tub_KAN512-10_4.tif:0008-0967	0.728	457.286	0	1190	76.052	156.032	0.475	332.924	12804	3.498	0.286	0.683
57	ARL13B_KAN512-10_4.tif:0009-0991	1.638	774.889	193	1821	36.848	159.841	0.674	1269.34	48818	2.716	0.368	0.824	1.80827	1.74138	1.32105		66	Ac-Tub_KAN512-10_4.tif:0009-0991	1.638	586.571	54	1380	36.848	159.841	0.674	960.862	36954	2.716	0.368	0.824
67	ARL13B_KAN512-10_5.tif:0001-0006	0.858	827.242	209	1435	94.158	0.916	0.786	709.817	27299	1.977	0.506	0.868	1.01118	0.973777	0.523812		80	Ac-Tub_KAN512-10_5.tif:0001-0006	0.858	1579.27	381	3005	94.158	0.916	0.786	1355.1	52116	1.977	0.506	0.868
68	ARL13B_KAN512-10_5.tif:0002-0264	2.34	932.644	211	2190	157.703	42.583	0.517	2182.52	83938	4.164	0.24	0.8	3.10915	2.99414	2.01112		81	Ac-Tub_KAN512-10_5.tif:0002-0264	2.34	463.744	0	2584	157.703	42.583	0.517	1085.23	41737	4.164	0.24	0.8
69	ARL13B_KAN512-10_5.tif:0003-0372	1.69	752.215	196	1643	110.142	60.13	0.705	1271.32	48894	2.237	0.447	0.833	1.81109	1.74409	1.09852		82	Ac-Tub_KAN512-10_5.tif:0003-0372	1.69	684.754	9	2343	110.142	60.13	0.705	1157.3	44509	2.237	0.447	0.833
70	ARL13B_KAN512-10_5.tif:0004-0416	1.17	321.889	192	535	72.02	67.225	0.465	376.633	14485	4.024	0.248	0.698	0.53654	0.516692	0.88936		83	Ac-Tub_KAN512-10_5.tif:0004-0416	1.17	361.933	9	1196	72.02	67.225	0.465	423.488	16287	4.024	0.248	0.698
71	ARL13B_KAN512-10_5.tif:0005-0512	1.586	608.361	190	1593	142.718	82.717	0.627	964.918	37110	2.904	0.344	0.813	1.37459	1.32374	0.953176		84	Ac-Tub_KAN512-10_5.tif:0005-0512	1.586	638.246	140	1484	142.718	82.717	0.627	1012.32	38933	2.904	0.344	0.813
72	ARL13B_KAN512-10_5.tif:0006-0521	1.3	661.04	173	1715	118.525	84.066	0.608	859.404	33052	3.248	0.308	0.847	1.22428	1.17899	1.66065		85	Ac-Tub_KAN512-10_5.tif:0006-0521	1.3	398.06	0	1245	118.525	84.066	0.608	517.509	19903	3.248	0.308	0.847
73	ARL13B_KAN512-10_5.tif:0007-0697	1.924	554.851	190	1324	41.025	112.441	0.608	1067.6	41059	3.093	0.323	0.796	1.52087	1.46461	0.813968		86	Ac-Tub_KAN512-10_5.tif:0007-0697	1.924	681.662	90	2193	41.025	112.441	0.608	1311.6	50443	3.093	0.323	0.796
74	ARL13B_KAN512-10_5.tif:0008-0702	0.884	302.147	194	483	182.023	113.183	0.347	267.114	10273	6.609	0.151	0.648	0.380523	0.366446	1.30054		87	Ac-Tub_KAN512-10_5.tif:0008-0702	0.884	232.324	0	656	182.023	113.183	0.347	205.386	7899	6.609	0.151	0.648
75	ARL13B_KAN512-10_5.tif:0009-0706	1.04	402.075	201	672	75.602	113.778	0.472	418.183	16083	4.322	0.231	0.696	0.595732	0.573694	0.565387		88	Ac-Tub_KAN512-10_5.tif:0009-0706	1.04	711.15	36	2356	75.602	113.778	0.472	739.641	28446	4.322	0.231	0.696
76	ARL13B_KAN512-10_5.tif:0010-0712	1.638	598.286	202	1204	2.878	114.788	0.651	980.051	37692	3.01	0.332	0.834	1.39615	1.3445	0.723872		89	Ac-Tub_KAN512-10_5.tif:0010-0712	1.638	826.508	17	2656	2.878	114.788	0.651	1353.9	52070	3.01	0.332	0.834
77	ARL13B_KAN512-10_5.tif:0011-0855	0.858	253.121	121	439	34.725	137.984	0.235	217.191	8353	5.866	0.17	0.512	0.309404	0.297958	0.889658		90	Ac-Tub_KAN512-10_5.tif:0011-0855	0.858	284.515	45	951	34.725	137.984	0.235	244.129	9389	5.866	0.17	0.512
78	ARL13B_KAN512-10_5.tif:0012-0877	1.066	429.049	207	780	166.766	141.414	0.549	457.394	17591	3.719	0.269	0.788	0.65159	0.627485	0.930938		91	Ac-Tub_KAN512-10_5.tif:0012-0877	1.066	460.878	0	1105	166.766	141.414	0.549	491.326	18896	3.719	0.269	0.788
79	ARL13B_KAN512-10_5.tif:0013-1000	1.56	553.5	173	1030	1.371	161.255	0.651	863.512	33210	2.365	0.423	0.784	1.23013	1.18463	0.869326		92	Ac-Tub_KAN512-10_5.tif:0013-1000	1.56	636.7	0	1728	1.371	161.255	0.651	993.312	38202	2.365	0.423	0.784
93	ARL13B_KAN512-10_6.tif:0001-0095	2.626	766.406	202	2127	181.514	15.278	0.614	2012.7	77407	3.043	0.329	0.824	2.86724	2.76117	1.48102		104	Ac-Tub_KAN512-10_6.tif:0001-0095	2.626	517.485	0	2843	181.514	15.278	0.614	1359	52266	3.043	0.329	0.824
94	ARL13B_KAN512-10_6.tif:0002-0162	2.184	589.655	192	1330	135.882	26.209	0.647	1287.88	49531	2.987	0.335	0.884	1.83468	1.76681	0.747514		105	Ac-Tub_KAN512-10_6.tif:0002-0162	2.184	788.821	0	2397	135.882	26.209	0.647	1722.89	66261	2.987	0.335	0.884
95	ARL13B_KAN512-10_6.tif:0003-0254	1.482	327.333	195	484	79.339	40.939	0.495	485.137	18658	3.589	0.279	0.76	0.691112	0.665546	0.51858		106	Ac-Tub_KAN512-10_6.tif:0003-0254	1.482	631.211	74	1617	79.339	40.939	0.495	935.51	35979	3.589	0.279	0.76
96	ARL13B_KAN512-10_6.tif:0004-0263	1.326	395	196	754	36.811	42.512	0.454	523.802	20145	4.858	0.206	0.81	0.746192	0.718588	0.609402		107	Ac-Tub_KAN512-10_6.tif:0004-0263	1.326	648.176	49	2843	36.811	42.512	0.454	859.534	33057	4.858	0.206	0.81
97	ARL13B_KAN512-10_6.tif:0005-0380	1.508	401.879	184	921	90.884	61.484	0.399	606.07	23309	5.43	0.184	0.779	0.86339	0.831451	0.822564		108	Ac-Tub_KAN512-10_6.tif:0005-0380	1.508	488.569	0	1733	90.884	61.484	0.399	736.806	28337	5.43	0.184	0.779
98	ARL13B_KAN512-10_6.tif:0006-0589	0.988	290.263	191	442	130.795	95.048	0.301	286.797	11030	5.967	0.168	0.58	0.408563	0.393449	0.681243		109	Ac-Tub_KAN512-10_6.tif:0006-0589	0.988	426.079	123	1093	130.795	95.048	0.301	420.991	16191	5.967	0.168	0.58
99	ARL13B_KAN512-10_6.tif:0007-0638	1.638	788.381	166	1843	198.636	102.922	0.66	1291.45	49668	2.261	0.442	0.792	1.83976	1.7717	0.742222		110	Ac-Tub_KAN512-10_6.tif:0007-0638	1.638	1062.19	0	3482	198.636	102.922	0.66	1739.97	66918	2.261	0.442	0.792
100	ARL13B_KAN512-10_6.tif:0008-0758	1.066	232.073	166	382	48.09	122.194	0.408	247.405	9515	4.16	0.24	0.752	0.352446	0.339408	0.259632		111	Ac-Tub_KAN512-10_6.tif:0008-0758	1.066	893.854	396	1582	48.09	122.194	0.408	952.905	36648	4.16	0.24	0.752
101	ARL13B_KAN512-10_6.tif:0009-0791	1.196	596.109	190	1146	97.728	127.472	0.73	712.989	27421	2.269	0.441	0.852	1.0157	0.978129	1.01514		112	Ac-Tub_KAN512-10_6.tif:0009-0791	1.196	587.217	40	1622	97.728	127.472	0.73	702.354	27012	2.269	0.441	0.852
102	ARL13B_KAN512-10_6.tif:0010-0973	0.624	230.75	142	338	150.789	157.232	0.177	143.997	5538	7.662	0.131	0.5	0.205133	0.197545	1.40594		113	Ac-Tub_KAN512-10_6.tif:0010-0973	0.624	164.125	0	567	150.789	157.232	0.177	102.42	3939	7.662	0.131	0.5
103	ARL13B_KAN512-10_6.tif:0011-0979	1.534	386.881	187	701	73.717	157.794	0.686	593.512	22826	2.625	0.381	0.831	0.8455	0.814222	0.993731		114	Ac-Tub_KAN512-10_6.tif:0011-0979	1.534	389.322	0	1285	73.717	157.794	0.686	597.256	22970	2.625	0.381	0.831
										29528.2				1.09376	1.0533	1.03807
115	ARL13B_KAN512-11_1.tif:0001-0100	1.482	640.105	211	1760	9.037	16.248	0.669	948.693	36486	3.171	0.315	0.905	1.35148	1.30149	0.704935		121	Ac-Tub_KAN512-11_1.tif:0001-0100	1.482	908.035	16	2454	9.037	16.248	0.669	1345.79	51758	3.171	0.315	0.905
116	ARL13B_KAN512-11_1.tif:0002-0270	2.548	340.816	21	993	114.779	43.587	0.476	868.452	33400	3.627	0.276	0.748	1.23717	1.1914	29.2469		122	Ac-Tub_KAN512-11_1.tif:0002-0270	2.548	11.653	0	84	114.779	43.587	0.476	29.694	1142	3.627	0.276	0.748
117	ARL13B_KAN512-11_1.tif:0003-0457	0.78	330.533	191	525	84.93	73.847	0.694	257.832	9916	2.559	0.391	0.833	0.367299	0.353712	0.535508		123	Ac-Tub_KAN512-11_1.tif:0003-0457	0.78	617.233	0	1735	84.93	73.847	0.694	481.471	18517	2.559	0.391	0.833
118	ARL13B_KAN512-11_1.tif:0004-0587	2.99	948.774	97	2061	47.912	94.642	0.464	2837.01	109109	4.396	0.227	0.804	4.04151	3.89201	1.43976		124	Ac-Tub_KAN512-11_1.tif:0004-0587	2.99	658.983	0	1746	47.912	94.642	0.464	1970.48	75783	4.396	0.227	0.804
119	ARL13B_KAN512-11_1.tif:0005-0725	1.144	553.455	194	1302	178.808	116.844	0.559	633.19	24352	3.731	0.268	0.772	0.902024	0.868656	0.626853		125	Ac-Tub_KAN512-11_1.tif:0005-0725	1.144	882.909	94	1893	178.808	116.844	0.559	1010.11	38848	3.731	0.268	0.772
120	ARL13B_KAN512-11_1.tif:0006-0936	0.468	317.556	49	638	72.348	151.1	0.408	148.625	5716	4.344	0.23	0.61	0.211727	0.203894	0.639159		126	Ac-Tub_KAN512-11_1.tif:0006-0936	0.468	496.833	122	1149	72.348	151.1	0.408	232.532	8943	4.344	0.23	0.61
127	ARL13B_KAN512-11_2.tif:0001-0041	2.028	734.731	59	1936	207.653	6.603	0.619	1490.12	57309	2.784	0.359	0.796	2.12279	2.04426	0.690803		137	Ac-Tub_KAN512-11_2.tif:0001-0041	2.028	1063.59	0	3134	207.653	6.603	0.619	2157.09	82960	2.784	0.359	0.796
128	ARL13B_KAN512-11_2.tif:0002-0444	0.728	319.821	197	608	48.243	71.583	0.529	232.844	8955	3.758	0.266	0.718	0.331703	0.319432	0.640971		138	Ac-Tub_KAN512-11_2.tif:0002-0444	0.728	498.964	129	1322	48.243	71.583	0.529	363.268	13971	3.758	0.266	0.718
129	ARL13B_KAN512-11_2.tif:0003-0463	1.118	372.372	191	635	137.488	74.661	0.444	416.337	16012	4.678	0.214	0.705	0.593102	0.571161	0.364904		139	Ac-Tub_KAN512-11_2.tif:0003-0463	1.118	1020.47	0	2195	137.488	74.661	0.444	1140.95	43880	4.678	0.214	0.705
130	ARL13B_KAN512-11_2.tif:0004-0533	1.898	767.644	190	1855	162.389	86.104	0.697	1457.08	56038	2.653	0.377	0.834	2.07571	1.99892	1.07811		140	Ac-Tub_KAN512-11_2.tif:0004-0533	1.898	712.027	0	3015	162.389	86.104	0.697	1351.51	51978	2.653	0.377	0.834
131	ARL13B_KAN512-11_2.tif:0005-0567	2.236	490.302	191	1281	211.794	91.5	0.406	1096.38	42166	4.527	0.221	0.714	1.56187	1.5041	1.50711		141	Ac-Tub_KAN512-11_2.tif:0005-0567	2.236	325.326	0	2735	211.794	91.5	0.406	727.472	27978	4.527	0.221	0.714
132	ARL13B_KAN512-11_2.tif:0006-0565	1.3	403.34	158	771	103.174	91.258	0.641	524.374	20167	3.045	0.328	0.877	0.747007	0.719373	0.494908		142	Ac-Tub_KAN512-11_2.tif:0006-0565	1.3	814.98	0	2316	103.174	91.258	0.641	1059.54	40749	3.045	0.328	0.877
133	ARL13B_KAN512-11_2.tif:0007-0770	1.43	591.182	192	1172	177.796	124.316	0.684	845.441	32515	2.769	0.361	0.84	1.20439	1.15984	0.630294		143	Ac-Tub_KAN512-11_2.tif:0007-0770	1.43	937.945	19	2501	177.796	124.316	0.684	1341.34	51587	2.769	0.361	0.84
134	ARL13B_KAN512-11_2.tif:0008-0796	0.598	283.957	203	412	92.961	128.471	0.59	169.816	6531	3.206	0.312	0.793	0.241915	0.232966	0.397747		144	Ac-Tub_KAN512-11_2.tif:0008-0796	0.598	713.913	201	1104	92.961	128.471	0.59	426.946	16420	3.206	0.312	0.793
135	ARL13B_KAN512-11_2.tif:0009-0924	1.508	286.328	194	452	198.666	148.928	0.462	431.808	16607	4.197	0.238	0.734	0.615141	0.592385	0.42752		145	Ac-Tub_KAN512-11_2.tif:0009-0924	1.508	669.741	0	2034	198.666	148.928	0.462	1010.03	38845	4.197	0.238	0.734
136	ARL13B_KAN512-11_2.tif:0010-0980	2.34	452.389	191	888	153.897	158.098	0.758	1058.65	40715	2.297	0.435	0.896	1.50813	1.45234	0.572121		146	Ac-Tub_KAN512-11_2.tif:0010-0980	2.34	790.722	0	1742	153.897	158.098	0.758	1850.4	71165	2.297	0.435	0.896
147	ARL13B_KAN512-11_3.tif:0001-0081	2.496	321.51	174	826	202.921	12.893	0.581	802.538	30865	2.921	0.342	0.838	1.14327	1.10098	5.51062		159	Ac-Tub_KAN512-11_3.tif:0001-0081	2.496	58.344	0	764	202.921	12.893	0.581	145.635	5601	2.921	0.342	0.838
148	ARL13B_KAN512-11_3.tif:0002-0094	0.416	241	191	333	183.896	15.228	0.338	100.262	3856	5.042	0.198	0.604	0.14283	0.137547	5.65396		160	Ac-Tub_KAN512-11_3.tif:0002-0094	0.416	42.625	0	124	183.896	15.228	0.338	17.733	682	5.042	0.198	0.604
149	ARL13B_KAN512-11_3.tif:0003-0131	1.872	400.194	192	1172	63.942	21.077	0.581	749.209	28814	3.101	0.322	0.783	1.0673	1.02782	0.56498		161	Ac-Tub_KAN512-11_3.tif:0003-0131	1.872	708.333	0	2584	63.942	21.077	0.581	1326.08	51000	3.101	0.322	0.783
150	ARL13B_KAN512-11_3.tif:0004-0228	2.314	724.382	20	2077	126.762	37.121	0.386	1676.32	64470	3.639	0.275	0.682	2.38804	2.2997	3.84276		162	Ac-Tub_KAN512-11_3.tif:0004-0228	2.314	188.506	0	2365	126.762	37.121	0.386	436.228	16777	3.639	0.275	0.682
151	ARL13B_KAN512-11_3.tif:0005-0228	0.572	229.409	175	301	27.259	36.758	0.19	131.23	5047	8.556	0.117	0.5	0.186946	0.180031	0.923344		163	Ac-Tub_KAN512-11_3.tif:0005-0228	0.572	248.455	54	658	27.259	36.758	0.19	142.125	5466	8.556	0.117	0.5
152	ARL13B_KAN512-11_3.tif:0006-0379	1.664	419.297	191	1003	58.987	61.164	0.368	697.752	26835	5.618	0.178	0.656	0.993997	0.957226	1.30705		164	Ac-Tub_KAN512-11_3.tif:0006-0379	1.664	320.797	1	1172	58.987	61.164	0.368	533.838	20531	5.618	0.178	0.656
153	ARL13B_KAN512-11_3.tif:0007-0662	1.716	474.833	193	1235	118.626	106.799	0.566	814.863	31339	3.4	0.294	0.815	1.16083	1.11789	1.96274		165	Ac-Tub_KAN512-11_3.tif:0007-0662	1.716	241.924	0	1489	118.626	106.799	0.566	415.167	15967	3.4	0.294	0.815
154	ARL13B_KAN512-11_3.tif:0008-0729	1.716	677.076	141	1378	155.838	117.588	0.615	1161.93	44687	3.434	0.291	0.917	1.65525	1.59402	3.53732		166	Ac-Tub_KAN512-11_3.tif:0008-0729	1.716	191.409	0	878	155.838	117.588	0.615	328.478	12633	3.434	0.291	0.917
155	ARL13B_KAN512-11_3.tif:0009-0803	0.962	213.297	178	262	214.717	129.678	0.368	205.204	7892	5.202	0.192	0.679	0.292328	0.281514	2.9962		167	Ac-Tub_KAN512-11_3.tif:0009-0803	0.962	71.189	0	299	214.717	129.678	0.368	68.488	2634	5.202	0.192	0.679
156	ARL13B_KAN512-11_3.tif:0010-0958	1.768	337.324	190	618	213.72	154.387	0.506	596.424	22938	3.706	0.27	0.743	0.849648	0.818217	2.58369		168	Ac-Tub_KAN512-11_3.tif:0010-0958	1.768	130.559	0	981	213.72	154.387	0.506	230.842	8878	3.706	0.27	0.743
157	ARL13B_KAN512-11_3.tif:0011-0976	1.768	572.353	195	1376	92.984	157.297	0.431	1011.98	38920	5.051	0.198	0.768	1.44164	1.38831	1.58702		169	Ac-Tub_KAN512-11_3.tif:0011-0976	1.768	360.647	0	1635	92.984	157.297	0.431	637.662	24524	5.051	0.198	0.768
158	ARL13B_KAN512-11_3.tif:0012-0999	1.196	362.065	196	598	167.682	161.166	0.454	433.056	16655	4.121	0.243	0.687	0.616919	0.594097	1.26596		170	Ac-Tub_KAN512-11_3.tif:0012-0999	1.196	286	0	1113	167.682	161.166	0.454	342.077	13156	4.121	0.243	0.687
171	ARL13B_KAN512-11_4.tif:0001-0149	2.652	304.559	191	462	126.488	24.099	0.42	807.739	31065	4.732	0.211	0.797	1.15068	1.10811	0.752398		177	Ac-Tub_KAN512-11_4.tif:0001-0149	2.652	404.784	0	1741	126.488	24.099	0.42	1073.55	41288	4.732	0.211	0.797
172	ARL13B_KAN512-11_4.tif:0002-0173	1.872	636.236	193	1192	183.812	27.843	0.402	1191.11	45809	5.177	0.193	0.738	1.69681	1.63404	1.90126		178	Ac-Tub_KAN512-11_4.tif:0002-0173	1.872	334.639	0	2032	183.812	27.843	0.402	626.482	24094	5.177	0.193	0.738
173	ARL13B_KAN512-11_4.tif:0003-0489	1.248	408.75	191	684	152.606	78.908	0.404	510.151	19620	5.165	0.194	0.768	0.726746	0.699861	5.54237		179	Ac-Tub_KAN512-11_4.tif:0003-0489	1.248	73.75	0	889	152.606	78.908	0.404	92.046	3540	5.165	0.194	0.768
174	ARL13B_KAN512-11_4.tif:0004-0629	0.676	278.769	207	407	216.565	101.389	0.681	188.459	7248	2.759	0.362	0.867	0.268474	0.258542	0.276641		180	Ac-Tub_KAN512-11_4.tif:0004-0629	0.676	1007.69	341	1690	216.565	101.389	0.681	681.241	26200	2.759	0.362	0.867
175	ARL13B_KAN512-11_4.tif:0005-0860	1.898	354.932	192	533	39.18	138.696	0.792	673.701	25910	1.763	0.567	0.859	0.959734	0.924231	1.47216		181	Ac-Tub_KAN512-11_4.tif:0005-0860	1.898	241.096	0	715	39.18	138.696	0.792	457.628	17600	1.763	0.567	0.859
176	ARL13B_KAN512-11_4.tif:0006-0998	1.716	309.924	191	443	99.144	161.015	0.706	531.862	20455	2.685	0.373	0.857	0.757675	0.729646	0.717896		182	Ac-Tub_KAN512-11_4.tif:0006-0998	1.716	431.712	0	1222	99.144	161.015	0.706	740.863	28493	2.685	0.373	0.857
183	ARL13B_KAN512-11_5.tif:0001-0083	1.144	308.773	190	567	110.189	13.369	0.44	353.257	13586	4.581	0.218	0.721	0.50324	0.484624	1.64899		191	Ac-Tub_KAN512-11_5.tif:0001-0083	1.144	187.25	0	544	110.189	13.369	0.44	214.227	8239	4.581	0.218	0.721
184	ARL13B_KAN512-11_5.tif:0002-0225	2.626	569.158	84	1907	56.746	36.223	0.413	1494.7	57485	3.834	0.261	0.709	2.12931	2.05054	1.15652		192	Ac-Tub_KAN512-11_5.tif:0002-0225	2.626	492.129	0	2298	56.746	36.223	0.413	1292.41	49705	3.834	0.261	0.709
185	ARL13B_KAN512-11_5.tif:0003-0271	2.548	771.806	194	2139	125.581	43.799	0.569	1966.68	75637	3.318	0.301	0.781	2.80168	2.69803	1.75622		193	Ac-Tub_KAN512-11_5.tif:0003-0271	2.548	439.469	0	2832	125.581	43.799	0.569	1119.84	43068	3.318	0.301	0.781
186	ARL13B_KAN512-11_5.tif:0004-0304	0.494	295.105	191	453	15.281	48.999	0.476	145.791	5607	4.729	0.211	0.691	0.207689	0.200006	1.75493		194	Ac-Tub_KAN512-11_5.tif:0004-0304	0.494	168.158	0	505	15.281	48.999	0.476	83.075	3195	4.729	0.211	0.691
187	ARL13B_KAN512-11_5.tif:0005-0320	1.066	298.024	199	443	221.756	51.484	0.317	317.713	12219	4.959	0.202	0.558	0.452605	0.435862	0.5305		195	Ac-Tub_KAN512-11_5.tif:0005-0320	1.066	561.78	0	1800	221.756	51.484	0.317	598.894	23033	4.959	0.202	0.558
188	ARL13B_KAN512-11_5.tif:0006-0404	2.21	414.682	163	977	154.099	65.193	0.707	916.503	35248	2.456	0.407	0.876	1.30562	1.25732	0.636855		196	Ac-Tub_KAN512-11_5.tif:0006-0404	2.21	651.141	0	3145	154.099	65.193	0.707	1439.11	55347	2.456	0.407	0.876
189	ARL13B_KAN512-11_5.tif:0007-0785	1.378	267.925	184	408	209.645	126.51	0.762	369.222	14200	2.046	0.489	0.883	0.525983	0.506525	2.00792		197	Ac-Tub_KAN512-11_5.tif:0007-0785	1.378	133.434	0	1101	209.645	126.51	0.762	183.883	7072	2.046	0.489	0.883
190	ARL13B_KAN512-11_5.tif:0008-0847	2.002	460.143	193	832	40.58	136.618	0.436	921.261	35431	4.616	0.217	0.716	1.3124	1.26385	1.06049		198	Ac-Tub_KAN512-11_5.tif:0008-0847	2.002	433.896	0	2085	40.58	136.618	0.436	868.712	33410	4.616	0.217	0.716
199	ARL13B_KAN512-11_6.tif:0001-0135	1.898	719.918	201	1770	62.836	21.728	0.486	1366.49	52554	3.886	0.257	0.768	1.94666	1.87464	2.9705		209	Ac-Tub_KAN512-11_6.tif:0001-0135	1.898	242.356	0	1961	62.836	21.728	0.486	460.02	17692	3.886	0.257	0.768
200	ARL13B_KAN512-11_6.tif:0002-0315	1.092	405.952	181	793	165.78	50.874	0.486	443.327	17050	3.961	0.252	0.778	0.63155	0.608187	30.2305		210	Ac-Tub_KAN512-11_6.tif:0002-0315	1.092	13.429	0	66	165.78	50.874	0.486	14.665	564	3.961	0.252	0.778
201	ARL13B_KAN512-11_6.tif:0003-0594	0.91	305.229	193	525	120.802	95.794	0.569	277.775	10683	3.449	0.29	0.805	0.39571	0.381071	0.663046		211	Ac-Tub_KAN512-11_6.tif:0003-0594	0.91	460.343	92	1135	120.802	95.794	0.569	418.937	16112	3.449	0.29	0.805
202	ARL13B_KAN512-11_6.tif:0004-0617	0.91	222.8	174	271	151.854	99.586	0.793	202.76	7798	1.451	0.689	0.824	0.288846	0.278161	0.268471		212	Ac-Tub_KAN512-11_6.tif:0004-0617	0.91	829.886	267	1587	151.854	99.586	0.793	755.241	29046	1.451	0.689	0.824
203	ARL13B_KAN512-11_6.tif:0005-0623	0.286	240.273	198	308	196.571	100.554	0.78	68.722	2643	1.611	0.621	0.733	0.0978996	0.0942779	176.2		213	Ac-Tub_KAN512-11_6.tif:0005-0623	0.286	1.364	0	6	196.571	100.554	0.78	0.39	15	1.611	0.621	0.733
204	ARL13B_KAN512-11_6.tif:0006-0637	0.338	237.462	181	304	46.297	102.722	0.697	80.267	3087	2.949	0.339	0.765	0.114346	0.110116	2.41738		214	Ac-Tub_KAN512-11_6.tif:0006-0637	0.338	98.231	0	356	46.297	102.722	0.697	33.204	1277	2.949	0.339	0.765
205	ARL13B_KAN512-11_6.tif:0007-0819	2.548	600.194	190	1346	106.904	132.202	0.511	1529.39	58819	3.711	0.269	0.82	2.17872	2.09812	1.77016		215	Ac-Tub_KAN512-11_6.tif:0007-0819	2.548	339.061	0	1461	106.904	132.202	0.511	863.98	33228	3.711	0.269	0.82
206	ARL13B_KAN512-11_6.tif:0008-0866	1.846	485.352	196	896	180.12	139.63	0.644	896.014	34460	2.449	0.408	0.798	1.27644	1.22922	1.58765		216	Ac-Tub_KAN512-11_6.tif:0008-0866	1.846	305.704	0	2335	180.12	139.63	0.644	564.364	21705	2.449	0.408	0.798
207	ARL13B_KAN512-11_6.tif:0009-0965	1.586	301.508	133	504	186.763	155.568	0.415	478.221	18392	5.495	0.182	0.731	0.681259	0.656058	0.811078		217	Ac-Tub_KAN512-11_6.tif:0009-0965	1.586	371.738	0	1427	186.763	155.568	0.415	589.612	22676	5.495	0.182	0.731
208	ARL13B_KAN512-11_6.tif:0010-1030	0.364	208.929	195	234	208.75	166.053	0.351	76.055	2925	4.888	0.205	0.528	0.108345	0.104337	1.66952		218	Ac-Tub_KAN512-11_6.tif:0010-1030	0.364	125.143	0	391	208.75	166.053	0.351	45.555	1752	4.888	0.205	0.528
										27812.4				1.0302	0.99209	5.99109
219	ARL13B_KAN512-12_1.tif:0001-0026	1.43	535.818	184	1207	77.422	4.206	0.442	766.266	29470	4.736	0.211	0.786	1.0916	1.05122	0.482648		227	Ac-Tub_KAN512-12_1.tif:0001-0026	1.43	1110.16	172	2954	77.422	4.206	0.442	1587.63	61059	4.736	0.211	0.786
220	ARL13B_KAN512-12_1.tif:0002-0022	0.65	289.12	202	420	9.433	3.512	0.692	187.939	7228	2.701	0.37	0.833	0.267733	0.257829	0.558664		228	Ac-Tub_KAN512-12_1.tif:0002-0022	0.65	517.52	182	1009	9.433	3.512	0.692	336.408	12938	2.701	0.37	0.833
221	ARL13B_KAN512-12_1.tif:0003-0035	1.014	559.795	190	1030	129.862	5.737	0.662	567.666	21832	2.973	0.336	0.821	0.808681	0.778765	1.52735		229	Ac-Tub_KAN512-12_1.tif:0003-0035	1.014	366.513	0	1415	129.862	5.737	0.662	371.666	14294	2.973	0.336	0.821
222	ARL13B_KAN512-12_1.tif:0004-0191	1.196	439.457	133	853	137.827	30.83	0.437	525.622	20215	4.386	0.228	0.76	0.748785	0.721085	0.713026		230	Ac-Tub_KAN512-12_1.tif:0004-0191	1.196	616.326	0	2561	137.827	30.83	0.437	737.17	28351	4.386	0.228	0.76
223	ARL13B_KAN512-12_1.tif:0005-0304	1.56	433.6	190	846	54.742	49.117	0.651	676.457	26016	2.554	0.391	0.789	0.963661	0.928012	0.814655		231	Ac-Tub_KAN512-12_1.tif:0005-0304	1.56	532.25	36	1649	54.742	49.117	0.651	830.36	31935	2.554	0.391	0.789
224	ARL13B_KAN512-12_1.tif:0006-0580	0.52	253.95	191	321	192.984	93.501	0.403	132.062	5079	4.887	0.205	0.714	0.188132	0.181172	0.456416		232	Ac-Tub_KAN512-12_1.tif:0006-0580	0.52	556.4	82	1628	192.984	93.501	0.403	289.345	11128	4.887	0.205	0.714
225	ARL13B_KAN512-12_1.tif:0007-0965	0.676	252	200	345	103.299	155.761	0.743	170.362	6552	1.37	0.73	0.732	0.242693	0.233715	0.694509		233	Ac-Tub_KAN512-12_1.tif:0007-0965	0.676	362.846	43	788	103.299	155.761	0.743	245.299	9434	1.37	0.73	0.732
226	ARL13B_KAN512-12_1.tif:0008-0979	0.598	262.826	188	354	197.002	157.86	0.712	157.179	6045	2.136	0.468	0.78	0.223913	0.21563	0.345666		234	Ac-Tub_KAN512-12_1.tif:0008-0979	0.598	760.348	88	1247	197.002	157.86	0.712	454.715	17488	2.136	0.468	0.78
235	ARL13B_KAN512-12_2.tif:0001-0040	1.222	376.468	196	862	10.202	6.507	0.654	460.072	17694	3.121	0.32	0.832	0.655405	0.631159	0.698181		246	Ac-Tub_KAN512-12_2.tif:0001-0040	1.222	539.213	0	1059	10.202	6.507	0.654	658.958	25343	3.121	0.32	0.832
236	ARL13B_KAN512-12_2.tif:0002-0083	1.274	509.122	207	1052	104.745	13.441	0.55	648.661	24947	3.61	0.277	0.748	0.924064	0.88988	0.791742		247	Ac-Tub_KAN512-12_2.tif:0002-0083	1.274	643.041	0	1899	104.745	13.441	0.55	819.283	31509	3.61	0.277	0.748
237	ARL13B_KAN512-12_2.tif:0003-0087	1.404	463.167	192	821	218.73	14.148	0.657	650.325	25011	3.053	0.327	0.9	0.926434	0.892163	1.11761		248	Ac-Tub_KAN512-12_2.tif:0003-0087	1.404	414.426	5	1478	218.73	14.148	0.657	581.889	22379	3.053	0.327	0.9
238	ARL13B_KAN512-12_2.tif:0004-0328	1.534	455.949	192	1108	13.101	52.968	0.451	699.468	26901	4.729	0.211	0.707	0.996442	0.95958	0.543971		249	Ac-Tub_KAN512-12_2.tif:0004-0328	1.534	838.186	0	1705	13.101	52.968	0.451	1285.86	49453	4.729	0.211	0.707
239	ARL13B_KAN512-12_2.tif:0005-0344	0.52	317.55	191	528	166.886	55.551	0.698	165.136	6351	2.605	0.384	0.8	0.235248	0.226545	12.2843		250	Ac-Tub_KAN512-12_2.tif:0005-0344	0.52	25.85	0	154	166.886	55.551	0.698	13.443	517	2.605	0.384	0.8
240	ARL13B_KAN512-12_2.tif:0006-0435	1.404	284.889	192	427	18.711	70.165	0.647	400.008	15384	2.795	0.358	0.857	0.56984	0.54876	0.829594		251	Ac-Tub_KAN512-12_2.tif:0006-0435	1.404	343.407	39	962	18.711	70.165	0.647	482.173	18544	2.795	0.358	0.857
241	ARL13B_KAN512-12_2.tif:0007-0438	0.312	203.167	189	231	204.008	70.775	0.503	63.392	2438	3.452	0.29	0.686	0.0903061	0.0869654	1.01795		252	Ac-Tub_KAN512-12_2.tif:0007-0438	0.312	199.583	47	525	204.008	70.775	0.503	62.274	2395	3.452	0.29	0.686
242	ARL13B_KAN512-12_2.tif:0008-0462	2.392	415.772	190	770	156.064	74.454	0.593	994.586	38251	3.433	0.291	0.911	1.41686	1.36444	0.480281		253	Ac-Tub_KAN512-12_2.tif:0008-0462	2.392	865.685	0	2901	156.064	74.454	0.593	2070.84	79643	3.433	0.291	0.911
243	ARL13B_KAN512-12_2.tif:0009-0492	2.444	489.149	71	1791	119.553	79.39	0.399	1195.55	45980	5.04	0.198	0.8	1.70315	1.64014	0.41751		254	Ac-Tub_KAN512-12_2.tif:0009-0492	2.444	1171.59	0	3107	119.553	79.39	0.399	2863.53	110129	5.04	0.198	0.8
244	ARL13B_KAN512-12_2.tif:0010-0622	1.586	390.443	198	928	122.091	100.241	0.658	619.279	23817	2.892	0.346	0.891	0.882207	0.849572	1.00791		255	Ac-Tub_KAN512-12_2.tif:0010-0622	1.586	387.377	0	1373	122.091	100.241	0.658	614.417	23630	2.892	0.346	0.891
245	ARL13B_KAN512-12_2.tif:0011-0654	1.014	270.051	210	396	67.913	105.509	0.645	273.848	10532	3.076	0.325	0.839	0.390117	0.375685	0.78691		256	Ac-Tub_KAN512-12_2.tif:0011-0654	1.014	343.179	15	1187	67.913	105.509	0.645	348.005	13384	3.076	0.325	0.839
257	ARL13B_KAN512-12_3.tif:0001-0044	0.754	268.483	180	400	156.026	7.109	0.596	202.448	7786	2.895	0.345	0.806	0.288402	0.277733	1.81619		271	Ac-Tub_KAN512-12_3.tif:0001-0044	0.754	147.828	23	314	156.026	7.109	0.596	111.469	4287	2.895	0.345	0.806
258	ARL13B_KAN512-12_3.tif:0002-0076	1.482	333.965	194	608	100.336	12.341	0.345	494.966	19036	5.863	0.171	0.659	0.705114	0.67903	1.8883		272	Ac-Tub_KAN512-12_3.tif:0002-0076	1.482	176.86	0	1066	100.336	12.341	0.345	262.122	10081	5.863	0.171	0.659
259	ARL13B_KAN512-12_3.tif:0003-0121	1.664	399.766	190	822	208.446	19.627	0.744	665.25	25585	1.822	0.549	0.8	0.947696	0.912638	1.37754		273	Ac-Tub_KAN512-12_3.tif:0003-0121	1.664	290.203	0	1092	208.446	19.627	0.744	482.927	18573	1.822	0.549	0.8
260	ARL13B_KAN512-12_3.tif:0004-0238	1.534	627.678	182	1373	158.887	38.316	0.649	962.916	37033	2.328	0.43	0.781	1.37174	1.321	0.445858		274	Ac-Tub_KAN512-12_3.tif:0004-0238	1.534	1407.8	0	3342	158.887	38.316	0.649	2159.69	83060	2.328	0.43	0.781
261	ARL13B_KAN512-12_3.tif:0005-0333	2.574	559.788	190	1289	87.211	53.754	0.799	1440.98	55419	1.973	0.507	0.9	2.05278	1.97684	1.22869		275	Ac-Tub_KAN512-12_3.tif:0005-0333	2.574	455.596	0	1457	87.211	53.754	0.799	1172.78	45104	1.973	0.507	0.9
262	ARL13B_KAN512-12_3.tif:0006-0376	0.962	511.595	197	970	204.881	60.641	0.639	492.184	18929	3.05	0.328	0.831	0.701151	0.675213	5.47873		276	Ac-Tub_KAN512-12_3.tif:0006-0376	0.962	93.378	0	391	204.881	60.641	0.639	89.835	3455	3.05	0.328	0.831
263	ARL13B_KAN512-12_3.tif:0007-0466	2.522	998.454	199	2632	176.747	75.187	0.721	2518.25	96850	2.448	0.408	0.886	3.58743	3.45472	1.79508		277	Ac-Tub_KAN512-12_3.tif:0007-0466	2.522	556.216	0	2952	176.747	75.187	0.721	1402.86	53953	2.448	0.408	0.886
264	ARL13B_KAN512-12_3.tif:0008-0564	1.898	803.11	197	2024	197.877	91.012	0.528	1524.39	58627	3.842	0.26	0.798	2.17161	2.09127	2.86097		278	Ac-Tub_KAN512-12_3.tif:0008-0564	1.898	280.712	0	2101	197.877	91.012	0.528	532.824	20492	3.842	0.26	0.798
265	ARL13B_KAN512-12_3.tif:0009-0582	0.65	262.6	190	420	123.979	93.799	0.451	170.7	6565	3.124	0.32	0.575	0.243175	0.234179	0.583659		279	Ac-Tub_KAN512-12_3.tif:0009-0582	0.65	449.92	0	1414	123.979	93.799	0.451	292.466	11248	3.124	0.32	0.575
266	ARL13B_KAN512-12_3.tif:0010-0712	0.988	373.105	144	725	108.318	114.84	0.569	368.65	14178	3.308	0.302	0.731	0.525168	0.505741	0.443673		280	Ac-Tub_KAN512-12_3.tif:0010-0712	0.988	840.947	0	2863	108.318	114.84	0.569	830.906	31956	3.308	0.302	0.731
267	ARL13B_KAN512-12_3.tif:0011-0729	1.638	726.238	203	1531	184.883	117.681	0.564	1189.65	45753	3.627	0.276	0.792	1.69474	1.63205	0.972392		281	Ac-Tub_KAN512-12_3.tif:0011-0729	1.638	746.857	0	2579	184.883	117.681	0.564	1223.43	47052	3.627	0.276	0.792
268	ARL13B_KAN512-12_3.tif:0012-0740	2.002	666.623	153	1477	73.435	119.456	0.648	1334.66	51330	2.666	0.375	0.815	1.90132	1.83098	1.24778		282	Ac-Tub_KAN512-12_3.tif:0012-0740	2.002	534.247	0	1657	73.435	119.456	0.648	1069.63	41137	2.666	0.375	0.815
269	ARL13B_KAN512-12_3.tif:0013-0926	1.378	297.358	190	471	170.896	149.261	0.738	409.785	15760	2.04	0.49	0.803	0.583767	0.562172	0.491379		283	Ac-Tub_KAN512-12_3.tif:0013-0926	1.378	605.151	6	1482	170.896	149.261	0.738	833.948	32073	2.04	0.49	0.803
270	ARL13B_KAN512-12_3.tif:0014-1021	0.754	282.586	199	468	138.934	164.645	0.401	213.083	8195	4.552	0.22	0.773	0.303552	0.292322	4.8121		284	Ac-Tub_KAN512-12_3.tif:0014-1021	0.754	58.724	0	253	138.934	164.645	0.401	44.281	1703	4.552	0.22	0.773
285	ARL13B_KAN512-12_4.tif:0001-0017	1.586	370.852	192	580	142.456	2.83	0.758	588.207	22622	2.281	0.438	0.878	0.837943	0.806945	1.51227		301	Ac-Tub_KAN512-12_4.tif:0001-0017	1.586	245.23	0	687	142.456	2.83	0.758	388.957	14959	2.281	0.438	0.878
286	ARL13B_KAN512-12_4.tif:0002-0070	1.014	359.513	193	666	220.576	11.426	0.522	364.568	14021	3.128	0.32	0.716	0.519353	0.50014	0.513759		302	Ac-Tub_KAN512-12_4.tif:0002-0070	1.014	699.769	0	1406	220.576	11.426	0.522	709.609	27291	3.128	0.32	0.716
287	ARL13B_KAN512-12_4.tif:0003-0103	1.794	349.913	191	594	111.551	16.757	0.759	627.782	24144	2.204	0.454	0.868	0.89432	0.861236	1.078		303	Ac-Tub_KAN512-12_4.tif:0003-0103	1.794	324.594	0	748	111.551	16.757	0.759	582.357	22397	2.204	0.454	0.868
288	ARL13B_KAN512-12_4.tif:0004-0186	1.976	359.211	171	708	45.848	29.999	0.402	709.843	27300	5.718	0.175	0.822	1.01122	0.973813	0.547709		304	Ac-Tub_KAN512-12_4.tif:0004-0186	1.976	655.842	0	1847	45.848	29.999	0.402	1296.02	49844	5.718	0.175	0.822
289	ARL13B_KAN512-12_4.tif:0005-0315	1.378	551.264	192	996	128.366	50.853	0.513	759.688	29217	3.989	0.251	0.791	1.08223	1.04219	0.629134		305	Ac-Tub_KAN512-12_4.tif:0005-0315	1.378	876.226	17	2931	128.366	50.853	0.513	1207.51	46440	3.989	0.251	0.791
290	ARL13B_KAN512-12_4.tif:0006-0429	0.78	444.8	67	1167	161.035	69.246	0.694	346.965	13344	2.626	0.381	0.811	0.494276	0.475991	290.087		306	Ac-Tub_KAN512-12_4.tif:0006-0429	0.78	1.533	0	9	161.035	69.246	0.694	1.196	46	2.626	0.381	0.811
291	ARL13B_KAN512-12_4.tif:0007-0516	1.04	367.15	18	1276	124.924	83.161	0.269	381.859	14686	3.122	0.32	0.44	0.543985	0.523861	17.9975		307	Ac-Tub_KAN512-12_4.tif:0007-0516	1.04	20.4	0	70	124.924	83.161	0.269	21.217	816	3.122	0.32	0.44
292	ARL13B_KAN512-12_4.tif:0008-0518	1.274	466.163	199	813	24.502	83.634	0.746	593.928	22842	2.183	0.458	0.875	0.846092	0.814793	0.902632		308	Ac-Tub_KAN512-12_4.tif:0008-0518	1.274	516.449	32	1382	24.502	83.634	0.746	657.996	25306	2.183	0.458	0.875
293	ARL13B_KAN512-12_4.tif:0009-0535	0.494	331.684	13	914	123.072	86.494	0.32	163.862	6302	4.102	0.244	0.576	0.233433	0.224797	9.87774		309	Ac-Tub_KAN512-12_4.tif:0009-0535	0.494	33.579	0	92	123.072	86.494	0.32	16.589	638	4.102	0.244	0.576
294	ARL13B_KAN512-12_4.tif:0010-0545	1.118	344.953	201	568	213.077	87.894	0.299	385.681	14833	7.224	0.138	0.61	0.54943	0.529105	3.30946		310	Ac-Tub_KAN512-12_4.tif:0010-0545	1.118	104.233	0	710	213.077	87.894	0.299	116.539	4482	7.224	0.138	0.61
295	ARL13B_KAN512-12_4.tif:0011-0555	1.82	687.6	198	1730	146.588	89.634	0.59	1251.51	48132	3.126	0.32	0.838	1.78286	1.71691	1.38374		311	Ac-Tub_KAN512-12_4.tif:0011-0555	1.82	496.914	0	2029	146.588	89.634	0.59	904.438	34784	3.126	0.32	0.838
296	ARL13B_KAN512-12_4.tif:0012-0574	0.572	283.5	108	550	83.652	92.433	0.461	162.172	6237	3.743	0.267	0.746	0.231025	0.222479	0.719709		312	Ac-Tub_KAN512-12_4.tif:0012-0574	0.572	393.909	0	1125	83.652	92.433	0.461	225.33	8666	3.743	0.267	0.746
297	ARL13B_KAN512-12_4.tif:0013-0726	1.04	333.525	200	549	163.479	117.068	0.262	346.887	13341	7.934	0.126	0.567	0.494165	0.475884	0.684189		313	Ac-Tub_KAN512-12_4.tif:0013-0726	1.04	487.475	0	2014	163.479	117.068	0.262	507.005	19499	7.934	0.126	0.567
298	ARL13B_KAN512-12_4.tif:0014-0786	1.456	404.214	202	901	110.911	126.708	0.681	588.571	22636	2.991	0.334	0.903	0.838462	0.807444	1.87975		314	Ac-Tub_KAN512-12_4.tif:0014-0786	1.456	215.036	0	1098	110.911	126.708	0.681	313.111	12042	2.991	0.334	0.903
299	ARL13B_KAN512-12_4.tif:0015-0803	2.106	566.148	190	1472	8.237	129.535	0.624	1192.38	45858	3.113	0.321	0.866	1.69863	1.63579	1.28231		315	Ac-Tub_KAN512-12_4.tif:0015-0803	2.106	441.506	41	1209	8.237	129.535	0.624	929.868	35762	3.113	0.321	0.866
300	ARL13B_KAN512-12_4.tif:0016-0872	2.184	340.25	0	938	65.483	140.652	0.604	743.151	28581	2.48	0.403	0.82	1.05867	1.01951	94.9535		316	Ac-Tub_KAN512-12_4.tif:0016-0872	2.184	3.583	0	16	65.483	140.652	0.604	7.826	301	2.48	0.403	0.82
317	ARL13B_KAN512-12_5.tif:0001-0006	1.144	877.591	232	1662	6.08	0.876	0.509	1004.02	38614	3.399	0.294	0.779	1.4303	1.37739	1.54092		328	Ac-Tub_KAN512-12_5.tif:0001-0006	1.144	569.523	0	1247	6.08	0.876	0.509	651.573	25059	3.399	0.294	0.779
318	ARL13B_KAN512-12_5.tif:0002-0084	1.638	320.698	193	649	145.229	13.344	0.389	525.336	20204	3.953	0.253	0.63	0.748378	0.720693	1.79098		329	Ac-Tub_KAN512-12_5.tif:0002-0084	1.638	179.063	0	822	145.229	13.344	0.389	293.324	11281	3.953	0.253	0.63
319	ARL13B_KAN512-12_5.tif:0003-0161	2.262	669.103	196	1459	163.842	25.951	0.715	1513.6	58212	2.432	0.411	0.861	2.15624	2.07647	1.47525		330	Ac-Tub_KAN512-12_5.tif:0003-0161	2.262	453.552	6	1145	163.842	25.951	0.715	1026	39459	2.432	0.411	0.861
320	ARL13B_KAN512-12_5.tif:0004-0163	0.858	269.242	77	451	24.757	26.345	0.456	231.024	8885	4.437	0.225	0.75	0.32911	0.316935	0.80714		331	Ac-Tub_KAN512-12_5.tif:0004-0163	0.858	333.576	39	994	24.757	26.345	0.456	286.225	11008	4.437	0.225	0.75
321	ARL13B_KAN512-12_5.tif:0005-0305	1.092	509.31	199	1029	72.57	49.316	0.7	556.199	21391	3.106	0.322	0.824	0.792346	0.763034	1.89653		332	Ac-Tub_KAN512-12_5.tif:0005-0305	1.092	268.548	9	987	72.57	49.316	0.7	293.272	11279	3.106	0.322	0.824
322	ARL13B_KAN512-12_5.tif:0006-0410	2.002	331.766	190	611	57.473	66.028	0.648	664.236	25546	2.606	0.384	0.851	0.946251	0.911246	0.773723		333	Ac-Tub_KAN512-12_5.tif:0006-0410	2.002	428.792	57	955	57.473	66.028	0.648	858.494	33017	2.606	0.384	0.851
323	ARL13B_KAN512-12_5.tif:0007-0414	2.21	596.6	193	1276	115.501	66.821	0.438	1318.57	50711	4.582	0.218	0.749	1.87839	1.8089	1.06243		334	Ac-Tub_KAN512-12_5.tif:0007-0414	2.21	561.541	0	2120	115.501	66.821	0.438	1241.08	47731	4.582	0.218	0.749
324	ARL13B_KAN512-12_5.tif:0008-0506	1.274	435.286	193	963	220.029	81.644	0.49	554.587	21329	3.199	0.313	0.658	0.790049	0.760823	1.95751		335	Ac-Tub_KAN512-12_5.tif:0008-0506	1.274	222.367	0	1039	220.029	81.644	0.49	283.313	10896	3.199	0.313	0.658
325	ARL13B_KAN512-12_5.tif:0009-0640	1.326	585.745	205	1235	109.807	103.255	0.694	776.745	29873	2.658	0.376	0.836	1.10653	1.06559	0.947657		336	Ac-Tub_KAN512-12_5.tif:0009-0640	1.326	618.098	22	1319	109.807	103.255	0.694	819.647	31523	2.658	0.376	0.836
326	ARL13B_KAN512-12_5.tif:0010-0650	1.508	559.052	191	1065	172.568	104.749	0.657	843.101	32425	3.082	0.324	0.921	1.20106	1.15663	0.782362		337	Ac-Tub_KAN512-12_5.tif:0010-0650	1.508	714.569	0	2890	172.568	104.749	0.657	1077.63	41445	3.082	0.324	0.921
327	ARL13B_KAN512-12_5.tif:0011-0928	2.47	867.8	123	2225	219.275	149.846	0.507	2143.59	82441	3.415	0.293	0.734	3.0537	2.94074	3.18884		338	Ac-Tub_KAN512-12_5.tif:0011-0928	2.47	272.137	0	1773	219.275	149.846	0.507	672.218	25853	3.415	0.293	0.734
339	ARL13B_KAN512-12_6.tif:0001-0271	1.82	662.7	199	1768	43.134	43.706	0.568	1206.19	46389	4.025	0.248	0.864	1.7183	1.65473	1.91358		350	Ac-Tub_KAN512-12_6.tif:0001-0271	1.82	346.314	0	1406	43.134	43.706	0.568	630.33	24242	4.025	0.248	0.864
340	ARL13B_KAN512-12_6.tif:0002-0303	0.546	295.905	180	528	174.638	48.847	0.6	161.574	6214	3.636	0.275	0.724	0.230173	0.221658	0.577187		351	Ac-Tub_KAN512-12_6.tif:0002-0303	0.546	512.667	87	890	174.638	48.847	0.6	279.933	10766	3.636	0.275	0.724
341	ARL13B_KAN512-12_6.tif:0003-0341	1.872	634.736	222	1298	106.228	54.901	0.548	1188.3	45701	2.59	0.386	0.727	1.69281	1.63019	1.14683		352	Ac-Tub_KAN512-12_6.tif:0003-0341	1.872	553.472	0	1996	106.228	54.901	0.548	1036.16	39850	2.59	0.386	0.727
342	ARL13B_KAN512-12_6.tif:0004-0404	2.106	837.568	203	2386	206.331	65.16	0.794	1764.02	67843	2.189	0.457	0.905	2.51298	2.42001	2.80123		353	Ac-Tub_KAN512-12_6.tif:0004-0404	2.106	299	0	1424	206.331	65.16	0.794	629.732	24219	2.189	0.457	0.905
343	ARL13B_KAN512-12_6.tif:0005-0446	1.066	269.585	192	483	26.628	71.967	0.558	287.395	11053	3.222	0.31	0.774	0.409415	0.394269	1.16298		354	Ac-Tub_KAN512-12_6.tif:0005-0446	1.066	231.805	0	615	26.628	71.967	0.558	247.119	9504	3.222	0.31	0.774
344	ARL13B_KAN512-12_6.tif:0006-0545	1.222	363	189	682	26.999	87.825	0.362	443.613	17061	6.071	0.165	0.712	0.631958	0.60858	0.606915		355	Ac-Tub_KAN512-12_6.tif:0006-0545	1.222	598.106	106	1937	26.999	87.825	0.362	730.93	28111	6.071	0.165	0.712
345	ARL13B_KAN512-12_6.tif:0007-0585	0.936	429.139	198	945	2.849	94.313	0.611	401.698	15449	3.402	0.294	0.766	0.572248	0.551078	0.967679		356	Ac-Tub_KAN512-12_6.tif:0007-0585	0.936	443.472	163	976	2.849	94.313	0.611	415.115	15965	3.402	0.294	0.766
346	ARL13B_KAN512-12_6.tif:0008-0637	1.404	369.963	114	670	96.159	102.806	0.496	519.459	19978	3.911	0.256	0.8	0.740007	0.712631	2.11699		357	Ac-Tub_KAN512-12_6.tif:0008-0637	1.404	174.759	0	1036	96.159	102.806	0.496	245.377	9437	3.911	0.256	0.8
347	ARL13B_KAN512-12_6.tif:0009-0727	1.664	451.375	199	771	10.257	117.317	0.504	751.133	28888	4.334	0.231	0.826	1.07004	1.03046	0.405799		358	Ac-Tub_KAN512-12_6.tif:0009-0727	1.664	1112.31	163	2029	10.257	117.317	0.504	1851	71188	4.334	0.231	0.826
348	ARL13B_KAN512-12_6.tif:0010-0792	1.924	992.784	190	2247	119.369	127.653	0.59	1910.23	73466	3.444	0.29	0.818	2.72126	2.62059	1.55218		359	Ac-Tub_KAN512-12_6.tif:0010-0792	1.924	639.608	0	2639	119.369	127.653	0.59	1230.68	47331	3.444	0.29	0.818
349	ARL13B_KAN512-12_6.tif:0011-1017	1.248	421.521	108	807	5.321	164.102	0.547	526.09	20233	2.825	0.354	0.727	0.749452	0.721727	1.25968		360	Ac-Tub_KAN512-12_6.tif:0011-1017	1.248	334.625	0	835	5.321	164.102	0.547	417.637	16062	2.825	0.354	0.727
										26997.1				1	0.963007
										28034.1				1.03841
361	ARL13B_KAN512-13_1.tif:0001-0150	1.69	688.092	126	1731	132.658	24.283	0.715	1162.95	44726	2.186	0.457	0.839	1.18492		1.24609		372	Ac-Tub_KAN512-13_1.tif:0001-0150	1.69	552.2	0	1816	132.658	24.283	0.715	933.274	35893	2.186	0.457	0.839
362	ARL13B_KAN512-13_1.tif:0002-0360	2.496	383.333	190	660	182.307	58.149	0.71	956.858	36800	2.611	0.383	0.893	0.974934		1.27124		373	Ac-Tub_KAN512-13_1.tif:0002-0360	2.496	301.542	0	657	182.307	58.149	0.71	752.693	28948	2.611	0.383	0.893
363	ARL13B_KAN512-13_1.tif:0003-0359	1.404	746.963	193	1494	140.198	58.026	0.647	1048.8	40336	2.967	0.337	0.837	1.06861		1.36783		374	Ac-Tub_KAN512-13_1.tif:0003-0359	1.404	546.093	0	2308	140.198	58.026	0.647	766.76	29489	2.967	0.337	0.837
364	ARL13B_KAN512-13_1.tif:0004-0451	1.274	1040.55	191	3078	41.831	72.821	0.783	1325.74	50987	2.184	0.458	0.852	1.35079		7.64079		375	Ac-Tub_KAN512-13_1.tif:0004-0451	1.274	136.184	0	838	41.831	72.821	0.783	173.508	6673	2.184	0.458	0.852
365	ARL13B_KAN512-13_1.tif:0005-0491	1.352	413.385	142	766	76.901	79.186	0.589	558.93	21496	3.585	0.279	0.937	0.569489		1.43116		376	Ac-Tub_KAN512-13_1.tif:0005-0491	1.352	288.846	0	856	76.901	79.186	0.589	390.544	15020	3.585	0.279	0.937
366	ARL13B_KAN512-13_1.tif:0006-0588	1.872	788.736	191	2612	215.271	94.793	0.72	1476.6	56789	2.518	0.397	0.852	1.5045		19.5151		377	Ac-Tub_KAN512-13_1.tif:0006-0588	1.872	40.417	0	708	215.271	94.793	0.72	75.665	2910	2.518	0.397	0.852
367	ARL13B_KAN512-13_1.tif:0007-0677	2.236	1055.38	130	2506	160.026	109.198	0.644	2359.98	90763	2.764	0.362	0.878	2.40456		3.14625		378	Ac-Tub_KAN512-13_1.tif:0007-0677	2.236	335.442	0	1701	160.026	109.198	0.644	750.093	28848	2.764	0.362	0.878
368	ARL13B_KAN512-13_1.tif:0008-0753	1.222	406.553	184	937	108.568	121.44	0.449	496.838	19108	4.92	0.203	0.723	0.506224		1.49937		379	Ac-Tub_KAN512-13_1.tif:0008-0753	1.222	271.149	0	1345	108.568	121.44	0.449	331.364	12744	4.92	0.203	0.723
369	ARL13B_KAN512-13_1.tif:0009-0758	1.248	602.083	190	1331	153.836	122.204	0.695	751.445	28900	2.835	0.353	0.821	0.765641		2.73986		380	Ac-Tub_KAN512-13_1.tif:0009-0758	1.248	219.75	3	1594	153.836	122.204	0.695	274.265	10548	2.835	0.353	0.821
370	ARL13B_KAN512-13_1.tif:0010-0760	0.338	257.462	192	406	23.437	122.482	0.403	87.027	3347	3.799	0.263	0.619	0.0886713		10.3622		381	Ac-Tub_KAN512-13_1.tif:0010-0760	0.338	24.846	0	64	23.437	122.482	0.403	8.399	323	3.799	0.263	0.619
371	ARL13B_KAN512-13_1.tif:0011-0959	1.456	478.875	193	801	173.479	154.734	0.671	697.284	26817	2.803	0.357	0.842	0.710457		0.688763		382	Ac-Tub_KAN512-13_1.tif:0011-0959	1.456	695.268	0	1667	173.479	154.734	0.671	1012.37	38935	2.803	0.357	0.842
383	ARL13B_KAN512-13_2.tif:0001-0116	2.73	657.181	194	1272	147.686	18.875	0.542	1794.21	69004	3.23	0.31	0.775	1.82811		1.53591		396	Ac-Tub_KAN512-13_2.tif:0001-0116	2.73	427.876	0	1921	147.686	18.875	0.542	1168.17	44927	3.23	0.31	0.775
384	ARL13B_KAN512-13_2.tif:0002-0231	1.43	300.127	190	455	1.913	37.203	0.243	429.208	16507	7.712	0.13	0.591	0.437316		1.75981		397	Ac-Tub_KAN512-13_2.tif:0002-0231	1.43	170.545	15	683	1.913	37.203	0.243	243.895	9380	7.712	0.13	0.591
385	ARL13B_KAN512-13_2.tif:0003-0318	0.806	348.452	193	550	67.421	51.395	0.702	280.869	10802	2.627	0.381	0.816	0.286175		1.39561		398	Ac-Tub_KAN512-13_2.tif:0003-0318	0.806	249.677	0	823	67.421	51.395	0.702	201.252	7740	2.627	0.381	0.816
386	ARL13B_KAN512-13_2.tif:0004-0423	1.56	679.9	198	1539	115.434	68.287	0.547	1060.71	40794	3.669	0.273	0.774	1.08075		1.92035		399	Ac-Tub_KAN512-13_2.tif:0004-0423	1.56	354.05	0	1957	115.434	68.287	0.547	552.351	21243	3.669	0.273	0.774
387	ARL13B_KAN512-13_2.tif:0005-0437	1.586	507.967	196	876	140.228	70.301	0.598	805.685	30986	2.839	0.352	0.777	0.820905		0.377726		400	Ac-Tub_KAN512-13_2.tif:0005-0437	1.586	1344.8	0	3249	140.228	70.301	0.598	2132.99	82033	2.839	0.352	0.777
388	ARL13B_KAN512-13_2.tif:0006-0492	1.69	464.877	211	1157	195.434	79.364	0.705	785.689	30217	2.311	0.433	0.807	0.800532		0.7689		401	Ac-Tub_KAN512-13_2.tif:0006-0492	1.69	604.6	0	2277	195.434	79.364	0.705	1021.84	39299	2.311	0.433	0.807
389	ARL13B_KAN512-13_2.tif:0007-0566	2.288	472.057	191	1184	89.602	91.409	0.433	1080.13	41541	4.35	0.23	0.749	1.10054		0.800096		402	Ac-Tub_KAN512-13_2.tif:0007-0566	2.288	590	0	2151	89.602	91.409	0.433	1350	51920	4.35	0.23	0.749
390	ARL13B_KAN512-13_2.tif:0008-0606	1.794	599.464	195	1777	170.358	97.702	0.541	1075.5	41363	3.591	0.278	0.807	1.09582		3.74631		403	Ac-Tub_KAN512-13_2.tif:0008-0606	1.794	160.014	0	1337	170.358	97.702	0.541	287.083	11041	3.591	0.278	0.807
391	ARL13B_KAN512-13_2.tif:0009-0636	0.546	266.286	195	359	58.422	102.582	0.511	145.401	5592	4.043	0.247	0.778	0.148148		1.07311		404	Ac-Tub_KAN512-13_2.tif:0009-0636	0.546	248.143	120	575	58.422	102.582	0.511	135.494	5211	4.043	0.247	0.778
392	ARL13B_KAN512-13_2.tif:0010-0763	1.404	529.222	194	1060	145.155	123.147	0.606	743.073	28578	2.971	0.337	0.8	0.75711		0.964626		405	Ac-Tub_KAN512-13_2.tif:0010-0763	1.404	548.63	0	1436	145.155	123.147	0.606	770.322	29626	2.971	0.337	0.8
393	ARL13B_KAN512-13_2.tif:0011-0953	2.236	741.326	198	1609	149.754	153.744	0.557	1657.7	63754	3.386	0.295	0.8	1.68902		2.1068		406	Ac-Tub_KAN512-13_2.tif:0011-0953	2.236	351.872	0	1823	149.754	153.744	0.557	786.833	30261	3.386	0.295	0.8
394	ARL13B_KAN512-13_2.tif:0012-0954	1.872	409.111	190	847	21.388	153.837	0.558	765.902	29456	3.558	0.281	0.814	0.780371		1.01758		407	Ac-Tub_KAN512-13_2.tif:0012-0954	1.872	402.042	93	914	21.388	153.837	0.558	752.667	28947	3.558	0.281	0.814
395	ARL13B_KAN512-13_2.tif:0013-0953	1.248	403.75	192	707	186.412	153.607	0.503	503.91	19380	3.977	0.251	0.774	0.51343		0.735875		408	Ac-Tub_KAN512-13_2.tif:0013-0953	1.248	548.667	132	1020	186.412	153.607	0.503	684.777	26336	3.977	0.251	0.774
409	ARL13B_KAN512-13_3.tif:0001-0039	1.898	609.219	192	1225	60.156	6.407	0.531	1156.37	44473	3.771	0.265	0.834	1.17821		0.771645		422	Ac-Tub_KAN512-13_3.tif:0001-0039	1.898	789.507	0	2341	60.156	6.407	0.531	1498.57	57634	3.771	0.265	0.834
410	ARL13B_KAN512-13_3.tif:0002-0101	3.068	448.424	180	1092	195.562	16.26	0.665	1375.85	52914	2.411	0.415	0.874	1.40184		2.67661		423	Ac-Tub_KAN512-13_3.tif:0002-0101	3.068	167.534	0	678	195.562	16.26	0.665	514.025	19769	2.411	0.415	0.874
411	ARL13B_KAN512-13_3.tif:0003-0131	1.118	374.023	195	763	220.157	21.223	0.414	418.183	16083	5.312	0.188	0.782	0.426083		2.67782		424	Ac-Tub_KAN512-13_3.tif:0003-0131	1.118	139.674	0	790	220.157	21.223	0.414	156.165	6006	5.312	0.188	0.782
412	ARL13B_KAN512-13_3.tif:0004-0136	2.314	524.303	191	1083	141.636	21.911	0.783	1213.31	46663	2.012	0.497	0.899	1.23623		1.06195		425	Ac-Tub_KAN512-13_3.tif:0004-0136	2.314	493.719	0	2151	141.636	21.911	0.783	1142.54	43941	2.012	0.497	0.899
413	ARL13B_KAN512-13_3.tif:0005-0354	3.458	585.045	190	1116	96.456	57.226	0.738	2023.21	77811	1.891	0.529	0.853	2.06143		1.09042		426	Ac-Tub_KAN512-13_3.tif:0005-0354	3.458	536.534	0	2041	96.456	57.226	0.738	1855.45	71359	1.891	0.529	0.853
414	ARL13B_KAN512-13_3.tif:0006-0694	1.664	410.906	190	791	81.683	112.031	0.479	683.789	26298	4.418	0.226	0.766	0.696707		0.554611		427	Ac-Tub_KAN512-13_3.tif:0006-0694	1.664	740.891	50	1844	81.683	112.031	0.479	1232.92	47417	4.418	0.226	0.766
415	ARL13B_KAN512-13_3.tif:0007-0719	1.092	542.81	191	984	191.838	115.966	0.744	592.784	22798	2.374	0.421	0.824	0.603982		1.81831		428	Ac-Tub_KAN512-13_3.tif:0007-0719	1.092	298.524	0	1414	191.838	115.966	0.744	326.008	12538	2.374	0.421	0.824
416	ARL13B_KAN512-13_3.tif:0008-0792	1.378	432.057	194	850	123.583	127.766	0.673	595.41	22899	2.595	0.385	0.815	0.606658		1.08495		429	Ac-Tub_KAN512-13_3.tif:0008-0792	1.378	398.226	0	2033	123.583	127.766	0.673	548.789	21106	2.595	0.385	0.815
417	ARL13B_KAN512-13_3.tif:0009-0922	0.338	290.692	213	399	57.721	148.741	0.545	98.26	3779	2.952	0.339	0.703	0.100116		1.31581		430	Ac-Tub_KAN512-13_3.tif:0009-0922	0.338	220.923	69	594	57.721	148.741	0.545	74.676	2872	2.952	0.339	0.703
418	ARL13B_KAN512-13_3.tif:0010-0928	1.586	475.361	193	865	60.367	149.707	0.731	753.967	28997	2.158	0.463	0.824	0.768211		1.06536		431	Ac-Tub_KAN512-13_3.tif:0010-0928	1.586	446.197	0	1199	60.367	149.707	0.731	707.711	27218	2.158	0.463	0.824
419	ARL13B_KAN512-13_3.tif:0011-0974	0.65	291.24	195	529	143.29	157.054	0.407	189.317	7281	4.591	0.218	0.685	0.192894		0.925865		432	Ac-Tub_KAN512-13_3.tif:0011-0974	0.65	314.56	48	1274	143.29	157.054	0.407	204.476	7864	4.591	0.218	0.685
420	ARL13B_KAN512-13_3.tif:0012-0992	0.286	255.727	198	313	213.825	159.997	0.741	73.142	2813	2.858	0.35	0.957	0.0745242		2.31142		433	Ac-Tub_KAN512-13_3.tif:0012-0992	0.286	110.636	0	313	213.825	159.997	0.741	31.644	1217	2.858	0.35	0.957
421	ARL13B_KAN512-13_3.tif:0013-1033	0.65	405.92	206	705	111.059	166.684	0.749	263.864	10148	2.032	0.492	0.926	0.268849		0.784841		434	Ac-Tub_KAN512-13_3.tif:0013-1033	0.65	517.2	0	1801	111.059	166.684	0.749	336.2	12930	2.032	0.492	0.926
435	ARL13B_KAN512-13_4.tif:0001-0102	1.352	456.538	166	909	177.034	16.454	0.692	617.277	23740	2.58	0.388	0.867	0.628938		0.654175		445	Ac-Tub_KAN512-13_4.tif:0001-0102	1.352	697.885	46	2133	177.034	16.454	0.692	943.597	36290	2.58	0.388	0.867
436	ARL13B_KAN512-13_4.tif:0002-0162	1.17	567.4	191	1102	113.88	26.167	0.702	663.898	25533	2.625	0.381	0.833	0.67644		0.768372		446	Ac-Tub_KAN512-13_4.tif:0002-0162	1.17	738.444	0	2181	113.88	26.167	0.702	864.032	33230	2.625	0.381	0.833
437	ARL13B_KAN512-13_4.tif:0003-0230	1.456	771.768	195	2085	75.508	37.157	0.625	1123.76	43219	3.156	0.317	0.882	1.14499		1.31834		447	Ac-Tub_KAN512-13_4.tif:0003-0230	1.456	585.411	0	2261	75.508	37.157	0.625	852.409	32783	3.156	0.317	0.882
438	ARL13B_KAN512-13_4.tif:0004-0249	2.574	402.909	190	700	14.593	40.204	0.745	1037.15	39888	1.783	0.561	0.868	1.05674		0.818887		448	Ac-Tub_KAN512-13_4.tif:0004-0249	2.574	492.02	8	1204	14.593	40.204	0.745	1266.54	48710	1.783	0.561	0.868
439	ARL13B_KAN512-13_4.tif:0005-0288	0.52	204.05	169	262	95.323	46.464	0.764	106.112	4081	1.519	0.658	0.769	0.108117		0.439716		449	Ac-Tub_KAN512-13_4.tif:0005-0288	0.52	464.05	149	653	95.323	46.464	0.764	241.321	9281	1.519	0.658	0.769
440	ARL13B_KAN512-13_4.tif:0006-0466	2.184	1017.61	202	3870	202.232	75.19	0.559	2222.59	85479	3.01	0.332	0.75	2.26458		1.61251		450	Ac-Tub_KAN512-13_4.tif:0006-0466	2.184	631.071	0	2497	202.232	75.19	0.559	1378.34	53010	3.01	0.332	0.75
441	ARL13B_KAN512-13_4.tif:0007-0466	1.404	336	192	634	51.49	75.14	0.49	471.772	18144	4.284	0.233	0.794	0.480685		0.572565		451	Ac-Tub_KAN512-13_4.tif:0007-0466	1.404	586.833	129	1626	51.49	75.14	0.49	823.964	31689	4.284	0.233	0.794
442	ARL13B_KAN512-13_4.tif:0008-0689	1.898	542.534	197	1148	11.894	111.177	0.675	1029.79	39605	2.415	0.414	0.844	1.04925		0.68674		452	Ac-Tub_KAN512-13_4.tif:0008-0689	1.898	790.014	0	2235	11.894	111.177	0.675	1499.54	57671	2.415	0.414	0.844
443	ARL13B_KAN512-13_4.tif:0009-0902	1.482	583.526	201	1283	146.708	145.406	0.495	864.838	33261	4.085	0.245	0.76	0.881176		0.733073		453	Ac-Tub_KAN512-13_4.tif:0009-0902	1.482	796	49	2090	146.708	145.406	0.495	1179.74	45372	4.085	0.245	0.76
444	ARL13B_KAN512-13_4.tif:0010-0950	1.222	306.979	139	519	21.427	153.23	0.507	375.151	14428	3.815	0.262	0.758	0.382238		0.578764		454	Ac-Tub_KAN512-13_4.tif:0010-0950	1.222	530.404	208	906	21.427	153.23	0.507	648.193	24929	3.815	0.262	0.758
455	ARL13B_KAN512-13_5.tif:0001-0118	2.6	573.02	136	1210	116.934	19.163	0.719	1489.94	57302	2.462	0.406	0.93	1.51809		0.810896		470	Ac-Tub_KAN512-13_5.tif:0001-0118	2.6	706.65	0	1897	116.934	19.163	0.719	1837.4	70665	2.462	0.406	0.93
456	ARL13B_KAN512-13_5.tif:0002-0216	1.43	242.691	175	334	56.767	34.785	0.605	347.069	13348	2.502	0.4	0.769	0.353625		0.846149		471	Ac-Tub_KAN512-13_5.tif:0002-0216	1.43	286.818	0	580	56.767	34.785	0.605	410.175	15775	2.502	0.4	0.769
457	ARL13B_KAN512-13_5.tif:0003-0282	2.392	514.13	191	1437	184.428	45.585	0.676	1229.87	47300	2.809	0.356	0.836	1.25311		1.2367		472	Ac-Tub_KAN512-13_5.tif:0003-0282	2.392	415.728	0	1049	184.428	45.585	0.676	994.482	38247	2.809	0.356	0.836
458	ARL13B_KAN512-13_5.tif:0004-0313	1.118	411.814	192	1126	14.233	50.623	0.671	460.436	17708	2.529	0.395	0.768	0.469134		0.647151		473	Ac-Tub_KAN512-13_5.tif:0004-0313	1.118	636.349	103	2184	14.233	50.623	0.671	711.481	27363	2.529	0.395	0.768
459	ARL13B_KAN512-13_5.tif:0005-0352	1.196	567.891	200	1018	93.241	56.76	0.636	679.239	26123	3.041	0.329	0.844	0.692071		0.577994		474	Ac-Tub_KAN512-13_5.tif:0005-0352	1.196	982.522	169	2726	93.241	56.76	0.636	1175.17	45196	3.041	0.329	0.844
460	ARL13B_KAN512-13_5.tif:0006-0395	1.066	637.537	196	1476	35.359	63.645	0.655	679.655	26139	2.879	0.347	0.781	0.692494		1.85462		475	Ac-Tub_KAN512-13_5.tif:0006-0395	1.066	343.756	44	1297	35.359	63.645	0.655	366.466	14094	2.879	0.347	0.781
461	ARL13B_KAN512-13_5.tif:0007-0431	2.99	832.8	193	2480	121.805	69.577	0.566	2490.22	95772	3.205	0.312	0.83	2.53727		2.02581		476	Ac-Tub_KAN512-13_5.tif:0007-0431	2.99	411.096	0	2543	121.805	69.577	0.566	1229.25	47276	3.205	0.312	0.83
462	ARL13B_KAN512-13_5.tif:0008-0611	1.326	576.98	211	1127	195.456	98.481	0.524	765.122	29426	3.901	0.256	0.773	0.779576		1.54443		477	Ac-Tub_KAN512-13_5.tif:0008-0611	1.326	373.588	0	1354	195.456	98.481	0.524	495.408	19053	3.901	0.256	0.773
463	ARL13B_KAN512-13_5.tif:0009-0669	2.678	519.146	173	1215	150.514	107.954	0.491	1390.36	53472	3.565	0.281	0.728	1.41662		1.62776		478	Ac-Tub_KAN512-13_5.tif:0009-0669	2.678	318.932	0	1379	150.514	107.954	0.491	854.151	32850	3.565	0.281	0.728
464	ARL13B_KAN512-13_5.tif:0010-0710	1.664	317.344	105	719	69.92	114.437	0.436	528.092	20310	4.733	0.211	0.776	0.538068		0.751415		479	Ac-Tub_KAN512-13_5.tif:0010-0710	1.664	422.328	57	1356	69.92	114.437	0.436	702.796	27029	4.733	0.211	0.776
465	ARL13B_KAN512-13_5.tif:0011-0774	0.936	286.583	53	540	186.521	124.879	0.596	268.258	10317	2.757	0.363	0.791	0.273326		0.508903		480	Ac-Tub_KAN512-13_5.tif:0011-0774	0.936	563.139	0	1461	186.521	124.879	0.596	527.13	20273	2.757	0.363	0.791
466	ARL13B_KAN512-13_5.tif:0012-0819	0.624	261.667	190	353	112.015	132.111	0.743	163.29	6280	1.489	0.672	0.774	0.166375		0.301401		481	Ac-Tub_KAN512-13_5.tif:0012-0819	0.624	868.167	43	2032	112.015	132.111	0.743	541.769	20836	1.489	0.672	0.774
467	ARL13B_KAN512-13_5.tif:0013-0832	1.326	713.294	203	1866	216.826	134.124	0.668	945.885	36378	3.038	0.329	0.85	0.963754		1.3213		482	Ac-Tub_KAN512-13_5.tif:0013-0832	1.326	539.843	0	2039	216.826	134.124	0.668	715.875	27532	3.038	0.329	0.85
468	ARL13B_KAN512-13_5.tif:0014-0847	0.39	251.533	200	319	157.783	136.627	0.612	98.104	3773	3.031	0.33	0.698	0.0999572		0.393267		483	Ac-Tub_KAN512-13_5.tif:0014-0847	0.39	639.6	397	907	157.783	136.627	0.612	249.459	9594	3.031	0.33	0.698
469	ARL13B_KAN512-13_5.tif:0015-0986	1.664	353.984	192	520	113.732	159.129	0.628	589.065	22655	3.161	0.316	0.842	0.600194		1.35149		484	Ac-Tub_KAN512-13_5.tif:0015-0986	1.664	261.922	20	533	113.732	159.129	0.628	435.864	16763	3.161	0.316	0.842
485	ARL13B_KAN512-13_6.tif:0001-0039	1.378	371.925	191	616	57.407	6.315	0.699	512.543	19712	2.504	0.399	0.828	0.522225		0.565608		498	Ac-Tub_KAN512-13_6.tif:0001-0039	1.378	657.566	233	1305	57.407	6.315	0.699	906.181	34851	2.504	0.399	0.828
486	ARL13B_KAN512-13_6.tif:0002-0048	1.82	1035.36	194	2461	172.528	7.761	0.635	1884.46	72475	2.619	0.382	0.843	1.92006		2.85009		499	Ac-Tub_KAN512-13_6.tif:0002-0048	1.82	363.271	0	2037	172.528	7.761	0.635	661.194	25429	2.619	0.382	0.843
487	ARL13B_KAN512-13_6.tif:0003-0074	1.872	622.681	191	1511	165.021	12.006	0.548	1165.73	44833	3.449	0.29	0.814	1.18775		5.61325		500	Ac-Tub_KAN512-13_6.tif:0003-0074	1.872	110.931	0	777	165.021	12.006	0.548	207.675	7987	3.449	0.29	0.814
488	ARL13B_KAN512-13_6.tif:0004-0149	1.3	468.76	202	948	121.847	24.075	0.504	609.425	23438	4.382	0.228	0.833	0.620937		2.12128		501	Ac-Tub_KAN512-13_6.tif:0004-0149	1.3	220.98	0	1060	121.847	24.075	0.504	287.291	11049	4.382	0.228	0.833
489	ARL13B_KAN512-13_6.tif:0005-0218	0.78	274.2	198	446	54.911	35.212	0.476	213.889	8226	3.891	0.257	0.789	0.21793		164.52		502	Ac-Tub_KAN512-13_6.tif:0005-0218	0.78	1.667	0	10	54.911	35.212	0.476	1.3	50	3.891	0.257	0.789
490	ARL13B_KAN512-13_6.tif:0006-0232	1.014	230.692	146	362	55.679	37.35	0.482	233.936	8997	4.524	0.221	0.83	0.238355		99.9667		503	Ac-Tub_KAN512-13_6.tif:0006-0232	1.014	2.308	0	9	55.679	37.35	0.482	2.34	90	4.524	0.221	0.83
491	ARL13B_KAN512-13_6.tif:0007-0253	1.534	948.576	202	2761	134.495	40.83	0.733	1455.2	55966	2.324	0.43	0.849	1.48269		2.2576		504	Ac-Tub_KAN512-13_6.tif:0007-0253	1.534	420.169	0	1510	134.495	40.83	0.733	644.579	24790	2.324	0.43	0.849
492	ARL13B_KAN512-13_6.tif:0008-0353	1.586	723.967	191	1595	54.284	56.891	0.571	1148.28	44162	3.394	0.295	0.824	1.16997		1.28842		505	Ac-Tub_KAN512-13_6.tif:0008-0353	1.586	561.902	0	1365	54.284	56.891	0.571	891.23	34276	3.394	0.295	0.824
493	ARL13B_KAN512-13_6.tif:0009-0375	1.014	268.744	181	399	165.321	60.467	0.565	272.522	10481	3.373	0.296	0.722	0.277671		4.00344		506	Ac-Tub_KAN512-13_6.tif:0009-0375	1.014	67.128	0	344	165.321	60.467	0.565	68.072	2618	3.373	0.296	0.722
494	ARL13B_KAN512-13_6.tif:0010-0552	1.924	666.284	166	1375	116.359	89.086	0.62	1282.01	49305	3.248	0.308	0.949	1.30623		1.71454		507	Ac-Tub_KAN512-13_6.tif:0010-0552	1.924	388.608	0	2391	116.359	89.086	0.62	747.727	28757	3.248	0.308	0.949
495	ARL13B_KAN512-13_6.tif:0011-0647	0.832	255.625	198	386	123.709	104.152	0.248	212.693	8180	7.195	0.139	0.577	0.216711		0.200367		508	Ac-Tub_KAN512-13_6.tif:0011-0647	0.832	1275.78	650	1948	123.709	104.152	0.248	1061.51	40825	7.195	0.139	0.577
496	ARL13B_KAN512-13_6.tif:0012-0724	2.314	446.045	191	855	183.909	116.67	0.487	1032.21	39698	4.092	0.244	0.748	1.05171		0.647475		509	Ac-Tub_KAN512-13_6.tif:0012-0724	2.314	688.899	0	2061	183.909	116.67	0.487	1594.21	61312	4.092	0.244	0.748
497	ARL13B_KAN512-13_6.tif:0013-1033	1.118	332.698	190	527	76.198	166.648	0.515	371.978	14306	4.101	0.244	0.789	0.379006		0.438929		510	Ac-Tub_KAN512-13_6.tif:0013-1033	1.118	757.977	244	1435	76.198	166.648	0.515	847.469	32593	4.101	0.244	0.789
										32059.5				0.849344		#DIV/0!
																#DIV/0!
																#DIV/0!
																#DIV/0!
511	ARL13B_KAN512-14_1.tif:0001-0074	1.872	578.278	191	1315	11.753	12.112	0.542	1082.6	41636	3.338	0.3	0.754	1.10305		1.40762		522	Ac-Tub_KAN512-14_1.tif:0001-0074	1.872	410.819	17	1376	11.753	12.112	0.542	769.1	29579	3.338	0.3	0.754
512	ARL13B_KAN512-14_1.tif:0002-0094	0.884	510.324	191	905	72.197	15.243	0.786	451.153	17351	2.224	0.45	0.872	0.459676		1.0635		523	Ac-Tub_KAN512-14_1.tif:0002-0094	0.884	479.853	0	1567	72.197	15.243	0.786	424.216	16315	2.224	0.45	0.872
513	ARL13B_KAN512-14_1.tif:0003-0195	1.17	619.4	194	1136	122.677	31.514	0.627	724.742	27873	2.953	0.339	0.811	0.738433		1.27665		524	Ac-Tub_KAN512-14_1.tif:0003-0195	1.17	485.178	0	1169	122.677	31.514	0.627	567.692	21833	2.953	0.339	0.811
514	ARL13B_KAN512-14_1.tif:0004-0259	0.936	219.639	172	279	128.386	41.629	0.68	205.594	7907	1.744	0.573	0.758	0.209478		1.23992		525	Ac-Tub_KAN512-14_1.tif:0004-0259	0.936	177.139	51	310	128.386	41.629	0.68	165.812	6377	1.744	0.573	0.758
515	ARL13B_KAN512-14_1.tif:0005-0309	2.262	508.46	196	2136	48.22	49.924	0.503	1150.2	44236	4.289	0.233	0.777	1.17193		0.805257		526	Ac-Tub_KAN512-14_1.tif:0005-0309	2.262	631.425	0	2742	48.22	49.924	0.503	1428.37	54934	4.289	0.233	0.777
516	ARL13B_KAN512-14_1.tif:0006-0441	0.624	313.625	190	621	119.802	71.205	0.743	195.714	7527	1.179	0.848	0.8	0.199411		0.868968		527	Ac-Tub_KAN512-14_1.tif:0006-0441	0.624	360.917	33	759	119.802	71.205	0.743	225.226	8662	1.179	0.848	0.8
517	ARL13B_KAN512-14_1.tif:0007-0662	1.378	471.642	190	1253	207.521	106.792	0.733	649.961	24997	1.825	0.548	0.891	0.66224		0.751654		528	Ac-Tub_KAN512-14_1.tif:0007-0662	1.378	627.472	0	1663	207.521	106.792	0.733	864.708	33256	1.825	0.548	0.891
518	ARL13B_KAN512-14_1.tif:0008-0695	1.534	363.542	190	605	107.402	112.144	0.649	557.708	21449	2.881	0.347	0.819	0.568243		0.735588		529	Ac-Tub_KAN512-14_1.tif:0008-0695	1.534	494.22	0	1164	107.402	112.144	0.649	758.18	29159	2.881	0.347	0.819
519	ARL13B_KAN512-14_1.tif:0009-0767	0.364	258	193	384	11.564	123.713	0.587	93.918	3612	3.177	0.315	0.7	0.0956919		0.809502		530	Ac-Tub_KAN512-14_1.tif:0009-0767	0.364	318.714	0	672	11.564	123.713	0.587	116.019	4462	3.177	0.315	0.7
520	ARL13B_KAN512-14_1.tif:0010-0829	1.43	397.4	194	1001	174.99	133.772	0.349	568.316	21857	4.775	0.209	0.64	0.579052		1.52975		531	Ac-Tub_KAN512-14_1.tif:0010-0829	1.43	259.782	18	680	174.99	133.772	0.349	371.51	14288	4.775	0.209	0.64
521	ARL13B_KAN512-14_1.tif:0011-1029	1.066	409.805	198	772	39.528	165.905	0.46	436.878	16802	4.145	0.241	0.726	0.445131		1.28318		532	Ac-Tub_KAN512-14_1.tif:0011-1029	1.066	319.366	0	894	39.528	165.905	0.46	340.465	13094	4.145	0.241	0.726
533	ARL13B_KAN512-14_2.tif:0001-0078	1.872	676.736	196	1794	95.377	12.649	0.403	1266.93	48725	4.553	0.22	0.735	1.29086		0.996442		544	Ac-Tub_KAN512-14_2.tif:0001-0078	1.872	679.153	0	2710	95.377	12.649	0.403	1271.45	48899	4.553	0.22	0.735
534	ARL13B_KAN512-14_2.tif:0002-0141	1.976	589.013	190	1466	107.463	22.766	0.549	1163.96	44765	2.975	0.336	0.734	1.18595		0.648496		545	Ac-Tub_KAN512-14_2.tif:0002-0141	1.976	908.276	0	2667	107.463	22.766	0.549	1794.86	69029	2.975	0.336	0.734
535	ARL13B_KAN512-14_2.tif:0003-0172	0.546	303.333	191	494	99.917	27.823	0.55	165.63	6370	3.083	0.324	0.824	0.168759		0.384291		546	Ac-Tub_KAN512-14_2.tif:0003-0172	0.546	789.333	188	2096	99.917	27.823	0.55	431.002	16576	3.083	0.324	0.824
536	ARL13B_KAN512-14_2.tif:0004-0381	1.222	579.468	192	1364	173.397	61.417	0.704	708.153	27235	2.495	0.401	0.825	0.721531		0.84678		547	Ac-Tub_KAN512-14_2.tif:0004-0381	1.222	684.319	3	1928	173.397	61.417	0.704	836.288	32163	2.495	0.401	0.825
537	ARL13B_KAN512-14_2.tif:0005-0457	0.676	208.846	11	366	163.979	73.84	0.211	141.189	5430	8.025	0.125	0.578	0.143856		0.341166		548	Ac-Tub_KAN512-14_2.tif:0005-0457	0.676	612.154	0	1605	163.979	73.84	0.211	413.841	15916	8.025	0.125	0.578
538	ARL13B_KAN512-14_2.tif:0006-0461	1.924	859.608	81	2387	57.032	74.347	0.659	1653.99	63611	2.642	0.379	0.855	1.68523		1.08477		549	Ac-Tub_KAN512-14_2.tif:0006-0461	1.924	792.432	0	1812	57.032	74.347	0.659	1524.73	58640	2.642	0.379	0.855
539	ARL13B_KAN512-14_2.tif:0007-0612	1.664	300.688	191	465	133.495	98.761	0.694	500.374	19244	1.955	0.511	0.821	0.509827		0.512463		550	Ac-Tub_KAN512-14_2.tif:0007-0612	1.664	586.75	91	1329	133.495	98.761	0.694	976.411	37552	1.955	0.511	0.821
540	ARL13B_KAN512-14_2.tif:0008-0629	0.858	341.091	200	499	34.139	101.702	0.41	292.674	11256	3.002	0.333	0.635	0.298203		0.511613		551	Ac-Tub_KAN512-14_2.tif:0008-0629	0.858	666.697	0	1203	34.139	101.702	0.41	572.06	22001	3.002	0.333	0.635
541	ARL13B_KAN512-14_2.tif:0009-0784	2.158	561.108	190	1119	169.286	126.45	0.682	1210.94	46572	2.65	0.377	0.834	1.23382		1.3078		552	Ac-Tub_KAN512-14_2.tif:0009-0784	2.158	429.048	0	1379	169.286	126.45	0.682	925.942	35611	2.65	0.377	0.834
542	ARL13B_KAN512-14_2.tif:0010-0925	0.962	242.351	194	303	132.602	149.172	0.628	233.156	8967	2.44	0.41	0.813	0.237561		0.412769		553	Ac-Tub_KAN512-14_2.tif:0010-0925	0.962	587.135	96	1169	132.602	149.172	0.628	564.858	21724	2.44	0.41	0.813
543	ARL13B_KAN512-14_2.tif:0011-1031	1.638	336.683	196	490	89.367	166.419	0.783	551.519	21211	1.824	0.548	0.875	0.561938		0.939871		554	Ac-Tub_KAN512-14_2.tif:0011-1031	1.638	358.222	0	880	89.367	166.419	0.783	586.803	22568	1.824	0.548	0.875
555	ARL13B_KAN512-14_3.tif:0001-0022	1.43	1063.29	0	3144	42.8	3.587	0.705	1520.6	58481	1.209	0.827	0.859	1.54932		0.831357		567	Ac-Tub_KAN512-14_3.tif:0001-0022	1.43	1278.98	30	3476	42.8	3.587	0.705	1829.05	70344	1.209	0.827	0.859
556	ARL13B_KAN512-14_3.tif:0002-0041	2.028	1014.06	163	3613	174.545	6.597	0.755	2056.65	79097	2.106	0.475	0.862	2.0955		1.08093		568	Ac-Tub_KAN512-14_3.tif:0002-0041	2.028	938.141	0	3096	174.545	6.597	0.755	1902.66	73175	2.106	0.475	0.862
557	ARL13B_KAN512-14_3.tif:0003-0179	0.962	476.595	201	766	47.58	28.992	0.512	458.512	17634	3.961	0.252	0.779	0.467173		0.428166		569	Ac-Tub_KAN512-14_3.tif:0003-0179	0.962	1113.11	73	2188	47.58	28.992	0.512	1070.87	41185	3.961	0.252	0.779
558	ARL13B_KAN512-14_3.tif:0004-0232	1.898	420.342	190	859	131.705	37.519	0.562	797.858	30685	3.564	0.281	0.849	0.812931		0.920697		570	Ac-Tub_KAN512-14_3.tif:0004-0232	1.898	456.548	0	1802	131.705	37.519	0.562	866.58	33328	3.564	0.281	0.849
559	ARL13B_KAN512-14_3.tif:0005-0397	1.144	854.841	197	2165	40.181	64.009	0.78	977.997	37613	2.265	0.441	0.822	0.996472		1.08435		571	Ac-Tub_KAN512-14_3.tif:0005-0397	1.144	788.341	0	2242	40.181	64.009	0.78	901.916	34687	2.265	0.441	0.822
560	ARL13B_KAN512-14_3.tif:0006-0526	1.17	543.378	192	954	37.014	84.938	0.528	635.79	24452	3.798	0.263	0.826	0.647801		0.736063		572	Ac-Tub_KAN512-14_3.tif:0006-0526	1.17	738.222	11	1841	37.014	84.938	0.528	863.772	33220	3.798	0.263	0.826
561	ARL13B_KAN512-14_3.tif:0007-0759	0.884	232.088	190	314	64.661	122.322	0.598	205.178	7891	3.8	0.263	0.84	0.209054		0.409433		573	Ac-Tub_KAN512-14_3.tif:0007-0759	0.884	566.853	192	1141	64.661	122.322	0.598	501.128	19273	3.8	0.263	0.84
562	ARL13B_KAN512-14_3.tif:0008-0782	2.704	471.048	190	984	177.222	126.135	0.649	1273.79	48989	2.558	0.391	0.849	1.29785		1.20045		574	Ac-Tub_KAN512-14_3.tif:0008-0782	2.704	392.394	0	1264	177.222	126.135	0.649	1061.1	40809	2.558	0.391	0.849
563	ARL13B_KAN512-14_3.tif:0009-0874	1.326	397.51	190	688	218.306	140.912	0.59	527.13	20273	2.288	0.437	0.734	0.537088		0.579444		575	Ac-Tub_KAN512-14_3.tif:0009-0874	1.326	686.02	0	1717	218.306	140.912	0.59	909.717	34987	2.288	0.437	0.734
564	ARL13B_KAN512-14_3.tif:0010-0920	1.768	1056.13	192	2492	138.725	148.355	0.583	1867.35	71817	3.467	0.288	0.824	1.90263		2.13082		576	Ac-Tub_KAN512-14_3.tif:0010-0920	1.768	495.647	0	1587	138.725	148.355	0.583	876.357	33704	3.467	0.288	0.824
565	ARL13B_KAN512-14_3.tif:0011-0959	1.586	259.18	192	357	100.505	154.63	0.63	411.085	15810	2.17	0.461	0.772	0.418851		0.715935		577	Ac-Tub_KAN512-14_3.tif:0011-0959	1.586	362.016	34	771	100.505	154.63	0.63	574.193	22083	2.17	0.461	0.772
566	ARL13B_KAN512-14_3.tif:0012-1032	1.17	476.644	196	885	188.216	166.412	0.663	557.708	21449	2.98	0.336	0.826	0.568243		1.06919		578	Ac-Tub_KAN512-14_3.tif:0012-1032	1.17	445.8	0	1315	188.216	166.412	0.663	521.617	20061	2.98	0.336	0.826
579	ARL13B_KAN512-14_4.tif:0001-0118	3.198	930.512	0	3197	181.069	19.158	0.395	2975.96	114453	2.713	0.369	0.613	3.03218		1.85451		583	Ac-Tub_KAN512-14_4.tif:0001-0118	3.198	501.756	0	2410	181.069	19.158	0.395	1604.71	61716	2.713	0.369	0.613
580	ARL13B_KAN512-14_4.tif:0002-0480	0.624	372.583	190	571	35.179	77.434	0.686	232.506	8942	2.498	0.4	0.787	0.236898		1.01406		584	Ac-Tub_KAN512-14_4.tif:0002-0480	0.624	367.417	120	780	35.179	77.434	0.686	229.282	8818	2.498	0.4	0.787
581	ARL13B_KAN512-14_4.tif:0003-0654	1.118	573.605	190	1282	200.158	105.501	0.724	641.329	24665	2.487	0.402	0.896	0.653444		1.25025		585	Ac-Tub_KAN512-14_4.tif:0003-0654	1.118	458.791	0	2287	200.158	105.501	0.724	512.959	19728	2.487	0.402	0.896
582	ARL13B_KAN512-14_4.tif:0004-0959	1.482	706.912	191	1652	85.6	154.751	0.764	1047.71	40294	2.206	0.453	0.826	1.0675		0.82102		586	Ac-Tub_KAN512-14_4.tif:0004-0959	1.482	861.018	39	2393	85.6	154.751	0.764	1276.11	49078	2.206	0.453	0.826
587	ARL13B_KAN512-14_5.tif:0001-0157	1.794	1102.25	195	2617	162.794	25.308	0.719	1977.55	76055	2.538	0.394	0.92	2.01491		2.9022		594	Ac-Tub_KAN512-14_5.tif:0001-0157	1.794	379.797	0	2083	162.794	25.308	0.719	681.397	26206	2.538	0.394	0.92
588	ARL13B_KAN512-14_5.tif:0002-0258	0.936	251.667	191	335	75.384	41.665	0.53	235.574	9060	3.333	0.3	0.727	0.240024		0.372518		595	Ac-Tub_KAN512-14_5.tif:0002-0258	0.936	675.583	3	1365	75.384	41.665	0.53	632.384	24321	3.333	0.3	0.727
589	ARL13B_KAN512-14_5.tif:0003-0635	1.794	669.884	197	1516	186.119	102.404	0.574	1201.84	46222	3.333	0.3	0.826	1.22455		0.877861		596	Ac-Tub_KAN512-14_5.tif:0003-0635	1.794	763.087	0	2416	186.119	102.404	0.574	1369.06	52653	3.333	0.3	0.826
590	ARL13B_KAN512-14_5.tif:0004-0656	0.884	287.971	191	443	89.821	105.699	0.521	254.581	9791	3.655	0.274	0.747	0.259391		2.0604		597	Ac-Tub_KAN512-14_5.tif:0004-0656	0.884	139.765	4	574	89.821	105.699	0.521	123.559	4752	3.655	0.274	0.747
591	ARL13B_KAN512-14_5.tif:0005-0870	1.222	379.979	141	772	72.218	140.437	0.525	464.362	17859	3.464	0.289	0.746	0.473134		1.02256		598	Ac-Tub_KAN512-14_5.tif:0005-0870	1.222	371.596	0	1478	72.218	140.437	0.525	454.117	17465	3.464	0.289	0.746
592	ARL13B_KAN512-14_5.tif:0006-0980	0.39	245.2	193	316	89.392	157.966	0.674	95.634	3678	2.356	0.424	0.732	0.0974404		0.614126		599	Ac-Tub_KAN512-14_5.tif:0006-0980	0.39	399.267	30	1043	89.392	157.966	0.674	155.723	5989	2.356	0.424	0.732
593	ARL13B_KAN512-14_5.tif:0007-1006	1.144	280.591	192	471	131.1	162.093	0.192	321.015	12346	8.006	0.125	0.506	0.32708		5.48955		600	Ac-Tub_KAN512-14_5.tif:0007-1006	1.144	51.114	0	265	131.1	162.093	0.192	58.478	2249	8.006	0.125	0.506
601	ARL13B_KAN512-14_6.tif:0001-0035	0.546	300.429	193	542	209.644	5.655	0.511	164.044	6309	3.886	0.257	0.712	0.167143		1.00111		610	Ac-Tub_KAN512-14_6.tif:0001-0035	0.546	300.095	0	678	209.644	5.655	0.511	163.862	6302	3.886	0.257	0.712
602	ARL13B_KAN512-14_6.tif:0002-0114	2.106	376.444	165	876	49.035	18.429	0.662	792.84	30492	2.664	0.375	0.848	0.807817		0.689241		611	Ac-Tub_KAN512-14_6.tif:0002-0114	2.106	546.173	0	2197	49.035	18.429	0.662	1150.31	44240	2.664	0.375	0.848
603	ARL13B_KAN512-14_6.tif:0003-0254	1.898	448.863	194	960	198.959	40.941	0.582	851.993	32767	3.303	0.303	0.753	0.868089		0.579229		612	Ac-Tub_KAN512-14_6.tif:0003-0254	1.898	774.932	0	2239	198.959	40.941	0.582	1470.91	56570	3.303	0.303	0.753
604	ARL13B_KAN512-14_6.tif:0004-0284	1.404	639.296	193	1602	89.461	45.953	0.628	897.626	34522	3.167	0.316	0.806	0.914583		1.16381		613	Ac-Tub_KAN512-14_6.tif:0004-0284	1.404	549.315	0	3652	89.461	45.953	0.628	771.284	29663	3.167	0.316	0.806
605	ARL13B_KAN512-14_6.tif:0005-0513	1.248	288.896	191	491	42.248	82.634	0.695	360.564	13867	2.43	0.412	0.793	0.367375		0.77708		614	Ac-Tub_KAN512-14_6.tif:0005-0513	1.248	371.771	0	1382	42.248	82.634	0.695	463.998	17845	2.43	0.412	0.793
606	ARL13B_KAN512-14_6.tif:0006-0665	2.418	539.785	190	1022	81.274	107.215	0.503	1305.28	50200	3.691	0.271	0.735	1.32994		0.618974		615	Ac-Tub_KAN512-14_6.tif:0006-0665	2.418	872.065	0	3169	81.274	107.215	0.503	2108.78	81102	3.691	0.271	0.735
607	ARL13B_KAN512-14_6.tif:0007-0804	1.586	759.049	192	1520	32.873	129.662	0.747	1203.92	46302	1.804	0.554	0.824	1.22667		0.59636		616	Ac-Tub_KAN512-14_6.tif:0007-0804	1.586	1272.8	144	2935	32.873	129.662	0.747	2018.79	77641	1.804	0.554	0.824
608	ARL13B_KAN512-14_6.tif:0008-0818	1.248	324.542	183	588	193.752	131.903	0.355	405.052	15578	4.645	0.215	0.636	0.412704		0.366835		617	Ac-Tub_KAN512-14_6.tif:0008-0818	1.248	884.708	83	2348	193.752	131.903	0.355	1104.18	42466	4.645	0.215	0.636
609	ARL13B_KAN512-14_6.tif:0009-0998	1.352	391.212	191	728	148.48	160.971	0.572	528.95	20343	3.146	0.318	0.794	0.538942		1.28908		618	Ac-Tub_KAN512-14_6.tif:0009-0998	1.352	303.481	0	1704	148.48	160.971	0.572	410.331	15781	3.146	0.318	0.794
										29380.9				0.778382		#DIV/0!
																#DIV/0!
																#DIV/0!
																#DIV/0!
619	ARL13B_KAN512-15_1.tif:0001-0116	2.938	719.575	0	1880	157.088	18.746	0.36	2114.24	81312	6.057	0.165	0.734	2.15418		1.55007		630	Ac-Tub_KAN512-15_1.tif:0001-0116	2.938	464.221	0	3381	157.088	18.746	0.36	1363.96	52457	6.057	0.165	0.734
620	ARL13B_KAN512-15_1.tif:0002-0132	0.546	268.571	178	444	204.338	21.32	0.412	146.649	5640	5.19	0.193	0.712	0.149419		1.40438		631	Ac-Tub_KAN512-15_1.tif:0002-0132	0.546	191.238	0	668	204.338	21.32	0.412	104.422	4016	5.19	0.193	0.712
621	ARL13B_KAN512-15_1.tif:0003-0180	2.288	358.466	193	612	111.002	29.036	0.799	820.219	31545	2.214	0.452	0.912	0.835714		0.822856		632	Ac-Tub_KAN512-15_1.tif:0003-0180	2.288	435.636	0	1356	111.002	29.036	0.799	996.796	38336	2.214	0.452	0.912
622	ARL13B_KAN512-15_1.tif:0004-0195	1.898	664.027	155	2098	34.877	31.445	0.612	1260.4	48474	3.554	0.281	0.93	1.28421		0.728571		633	Ac-Tub_KAN512-15_1.tif:0004-0195	1.898	911.411	91	3149	34.877	31.445	0.612	1729.96	66533	3.554	0.281	0.93
623	ARL13B_KAN512-15_1.tif:0005-0226	1.638	577.444	192	1086	67.821	36.464	0.598	945.911	36379	3.38	0.296	0.834	0.96378		0.953203		634	Ac-Tub_KAN512-15_1.tif:0005-0226	1.638	605.794	0	2814	67.821	36.464	0.598	992.35	38165	3.38	0.296	0.834
624	ARL13B_KAN512-15_1.tif:0006-0482	1.794	791.275	192	1741	53.541	77.775	0.626	1419.63	54598	2.636	0.379	0.793	1.44645		0.827606		635	Ac-Tub_KAN512-15_1.tif:0006-0482	1.794	956.101	48	3396	53.541	77.775	0.626	1715.35	65971	2.636	0.379	0.793
625	ARL13B_KAN512-15_1.tif:0007-0559	0.728	213.429	99	337	137.805	90.15	0.394	155.385	5976	6.211	0.161	0.8	0.158321		0.414223		636	Ac-Tub_KAN512-15_1.tif:0007-0559	0.728	515.25	117	1130	137.805	90.15	0.394	375.125	14427	6.211	0.161	0.8
626	ARL13B_KAN512-15_1.tif:0008-0569	1.43	549.745	147	1100	140.224	91.888	0.536	786.183	30236	3.924	0.255	0.859	0.801035		1.59886		637	Ac-Tub_KAN512-15_1.tif:0008-0569	1.43	343.836	0	1926	140.224	91.888	0.536	491.716	18911	3.924	0.255	0.859
627	ARL13B_KAN512-15_1.tif:0009-0607	1.69	490.462	194	967	183.221	97.825	0.518	828.93	31880	2.822	0.354	0.695	0.844589		0.726014		638	Ac-Tub_KAN512-15_1.tif:0009-0607	1.69	675.554	0	2219	183.221	97.825	0.518	1141.76	43911	2.822	0.354	0.695
628	ARL13B_KAN512-15_1.tif:0010-0649	1.092	652.714	200	1331	97.453	104.693	0.533	712.807	27414	3.333	0.3	0.73	0.726273		1.31124		639	Ac-Tub_KAN512-15_1.tif:0010-0649	1.092	497.786	0	2279	97.453	104.693	0.533	543.615	20907	3.333	0.3	0.73
629	ARL13B_KAN512-15_1.tif:0011-0716	0.364	214.786	190	239	25.397	115.455	0.515	78.187	3007	3.766	0.266	0.778	0.0796638		0.420148		640	Ac-Tub_KAN512-15_1.tif:0011-0716	0.364	511.214	226	809	25.397	115.455	0.515	186.093	7157	3.766	0.266	0.778
641	ARL13B_KAN512-15_2.tif:0001-0104	2.028	535.013	130	1060	137.598	16.778	0.717	1085.07	41731	2.596	0.385	0.934	1.10557		1.97105		645	Ac-Tub_KAN512-15_2.tif:0001-0104	2.028	271.436	0	894	137.598	16.778	0.717	550.505	21172	2.596	0.385	0.934
642	ARL13B_KAN512-15_2.tif:0002-0480	1.222	365.085	128	686	58	77.409	0.746	446.161	17159	2.361	0.424	0.904	0.454589		1.18723		646	Ac-Tub_KAN512-15_2.tif:0002-0480	1.222	307.511	15	1151	58	77.409	0.746	375.801	14453	2.361	0.424	0.904
643	ARL13B_KAN512-15_2.tif:0003-0522	0.286	204.273	104	297	118.585	84.297	0.431	58.426	2247	4.273	0.234	0.667	0.0595292		0.808273		647	Ac-Tub_KAN512-15_2.tif:0003-0522	0.286	252.727	56	724	118.585	84.297	0.431	72.284	2780	4.273	0.234	0.667
644	ARL13B_KAN512-15_2.tif:0004-0832	1.066	432.22	208	730	112.224	134.15	0.727	460.774	17721	2.463	0.406	0.812	0.469478		0.874507		648	Ac-Tub_KAN512-15_2.tif:0004-0832	1.066	494.244	48	1139	112.224	134.15	0.727	526.896	20264	2.463	0.406	0.812
649	ARL13B_KAN512-15_3.tif:0001-0116	1.04	249.275	169	324	115.475	18.854	0.385	259.262	9971	5.371	0.186	0.727	0.264159		0.288571		657	Ac-Tub_KAN512-15_3.tif:0001-0116	1.04	863.825	197	1532	115.475	18.854	0.385	898.432	34553	5.371	0.186	0.727
650	ARL13B_KAN512-15_3.tif:0002-0152	0.936	381	190	853	35.372	24.465	0.539	356.637	13716	3.485	0.287	0.791	0.363375		0.751273		658	Ac-Tub_KAN512-15_3.tif:0002-0152	0.936	507.139	27	2474	35.372	24.465	0.539	474.711	18257	3.485	0.287	0.791
651	ARL13B_KAN512-15_3.tif:0003-0342	2.21	690.671	190	1678	184.173	55.213	0.597	1526.47	58707	3.336	0.3	0.842	1.55531		0.998656		659	Ac-Tub_KAN512-15_3.tif:0003-0342	2.21	691.6	0	2564	184.173	55.213	0.597	1528.53	58786	3.336	0.3	0.842
652	ARL13B_KAN512-15_3.tif:0004-0644	2.886	435.333	193	957	126.887	103.801	0.567	1256.45	48322	3.303	0.303	0.79	1.28018		2.23268		660	Ac-Tub_KAN512-15_3.tif:0004-0644	2.886	194.982	0	1172	126.887	103.801	0.567	562.752	21643	3.303	0.303	0.79
653	ARL13B_KAN512-15_3.tif:0005-0683	0.936	206.083	164	252	100.633	110.21	0.358	192.906	7419	5.412	0.185	0.713	0.19655		1.66607		661	Ac-Tub_KAN512-15_3.tif:0005-0683	0.936	123.694	0	457	100.633	110.21	0.358	115.785	4453	5.412	0.185	0.713
654	ARL13B_KAN512-15_3.tif:0006-0737	2.21	614.647	173	1542	1.035	118.966	0.757	1358.45	52245	2.34	0.427	0.909	1.38411		1.26116		662	Ac-Tub_KAN512-15_3.tif:0006-0737	2.21	487.365	0	1507	1.035	118.966	0.757	1077.14	41426	2.34	0.427	0.909
655	ARL13B_KAN512-15_3.tif:0007-0966	1.092	478.095	192	1295	159.035	155.814	0.671	522.111	20080	2.788	0.359	0.771	0.531975		2.51		663	Ac-Tub_KAN512-15_3.tif:0007-0966	1.092	190.476	0	896	159.035	155.814	0.671	208.013	8000	2.788	0.359	0.771
656	ARL13B_KAN512-15_3.tif:0008-0976	2.392	761.098	192	2000	57.936	157.319	0.529	1820.66	70021	3.817	0.262	0.807	1.85505		1.50586		664	Ac-Tub_KAN512-15_3.tif:0008-0976	2.392	505.424	0	1657	57.936	157.319	0.529	1209.05	46499	3.817	0.262	0.807
665	ARL13B_KAN512-15_4.tif:0001-0293	1.586	258.066	162	411	163.897	47.369	0.561	409.317	15742	3.567	0.28	0.836	0.417049		0.387839		672	Ac-Tub_KAN512-15_4.tif:0001-0293	1.586	665.393	0	1808	163.897	47.369	0.561	1055.38	40589	3.567	0.28	0.836
666	ARL13B_KAN512-15_4.tif:0002-0391	0.91	256.657	171	444	75.887	62.996	0.533	233.572	8983	2.901	0.345	0.864	0.237985		0.460903		673	Ac-Tub_KAN512-15_4.tif:0002-0391	0.91	556.857	94	1336	75.887	62.996	0.533	506.771	19490	2.901	0.345	0.864
667	ARL13B_KAN512-15_4.tif:0003-0421	1.612	421.581	190	801	141.905	67.917	0.782	679.629	26138	1.91	0.524	0.879	0.692468		0.439708		674	Ac-Tub_KAN512-15_4.tif:0003-0421	1.612	958.774	0	2486	141.905	67.917	0.782	1545.64	59444	1.91	0.524	0.879
668	ARL13B_KAN512-15_4.tif:0004-0533	2.132	315.085	160	524	216.398	86.084	0.643	671.802	25837	2.742	0.365	0.816	0.684494		0.858971		675	Ac-Tub_KAN512-15_4.tif:0004-0533	2.132	366.817	0	928	216.398	86.084	0.643	782.101	30079	2.742	0.365	0.816
669	ARL13B_KAN512-15_4.tif:0005-0609	1.3	649.02	194	1797	26.906	98.23	0.692	843.777	32451	2.534	0.395	0.855	0.859717		1.24481		676	Ac-Tub_KAN512-15_4.tif:0005-0609	1.3	521.38	0	1401	26.906	98.23	0.692	677.835	26069	2.534	0.395	0.855
670	ARL13B_KAN512-15_4.tif:0006-0749	0.702	241.852	190	356	163.086	120.917	0.544	169.79	6530	3.508	0.285	0.711	0.172998		0.577212		677	Ac-Tub_KAN512-15_4.tif:0006-0749	0.702	419	198	734	163.086	120.917	0.544	294.156	11313	3.508	0.285	0.711
671	ARL13B_KAN512-15_4.tif:0007-0790	1.222	229.894	174	276	199.039	127.523	0.514	280.947	10805	4.324	0.231	0.879	0.286254		0.394761		678	Ac-Tub_KAN512-15_4.tif:0007-0790	1.222	582.362	53	1434	199.039	127.523	0.514	711.689	27371	4.324	0.231	0.879
679	ARL13B_KAN512-15_5.tif:0001-0034	0.754	359.379	194	566	6.97	5.419	0.483	270.988	10422	4.406	0.227	0.725	0.276108		1.07366		689	Ac-Tub_KAN512-15_5.tif:0001-0034	0.754	334.724	0	1546	6.97	5.419	0.483	252.397	9707	4.406	0.227	0.725
680	ARL13B_KAN512-15_5.tif:0002-0163	1.066	369.293	205	653	137.473	26.235	0.614	393.69	15141	2.638	0.379	0.82	0.401127		0.453908		690	Ac-Tub_KAN512-15_5.tif:0002-0163	1.066	813.585	130	1558	137.473	26.235	0.614	867.334	33357	2.638	0.379	0.82
681	ARL13B_KAN512-15_5.tif:0003-0312	0.754	328.138	190	551	25.591	50.402	0.533	247.431	9516	3.977	0.251	0.753	0.252105		0.693081		691	Ac-Tub_KAN512-15_5.tif:0003-0312	0.754	473.448	51	1386	25.591	50.402	0.533	357.001	13730	3.977	0.251	0.753
682	ARL13B_KAN512-15_5.tif:0004-0381	1.872	722.778	191	1764	172.13	61.472	0.662	1353.12	52040	2.916	0.343	0.883	1.37868		1.17802		692	Ac-Tub_KAN512-15_5.tif:0004-0381	1.872	613.556	3	2768	172.13	61.472	0.662	1148.64	44176	2.916	0.343	0.883
683	ARL13B_KAN512-15_5.tif:0005-0443	1.534	893.61	181	2305	50.713	71.534	0.756	1370.88	52723	2.532	0.395	0.959	1.39678		2.14147		693	Ac-Tub_KAN512-15_5.tif:0005-0443	1.534	417.288	0	1538	50.713	71.534	0.756	640.159	24620	2.532	0.395	0.959
684	ARL13B_KAN512-15_5.tif:0006-0710	1.014	282.795	193	442	220.005	114.585	0.717	286.771	11029	1.348	0.742	0.804	0.292189		2.52149		694	Ac-Tub_KAN512-15_5.tif:0006-0710	1.014	112.154	0	371	220.005	114.585	0.717	113.731	4374	1.348	0.742	0.804
685	ARL13B_KAN512-15_5.tif:0007-0762	1.846	495.338	190	1049	174.66	123.021	0.443	914.449	35169	4.224	0.237	0.724	0.931724		0.76466		695	Ac-Tub_KAN512-15_5.tif:0007-0762	1.846	647.789	0	2863	174.66	123.021	0.443	1195.89	45993	4.224	0.237	0.724
686	ARL13B_KAN512-15_5.tif:0008-0812	0.78	389.733	198	572	8.396	130.865	0.552	304.01	11692	3.385	0.295	0.75	0.309753		0.696574		696	Ac-Tub_KAN512-15_5.tif:0008-0812	0.78	559.5	0	988	8.396	130.865	0.552	436.436	16785	3.385	0.295	0.75
687	ARL13B_KAN512-15_5.tif:0009-0937	0.546	283.762	204	438	161.507	151.064	0.69	154.943	5959	2.186	0.458	0.75	0.15787		1.06108		697	Ac-Tub_KAN512-15_5.tif:0009-0937	0.546	267.429	86	470	161.507	151.064	0.69	146.025	5616	2.186	0.458	0.75
688	ARL13B_KAN512-15_5.tif:0010-0977	0.702	406.111	212	700	64.366	157.664	0.599	285.107	10965	3.622	0.276	0.74	0.290493		0.892407		698	Ac-Tub_KAN512-15_5.tif:0010-0977	0.702	455.074	68	1097	64.366	157.664	0.599	319.481	12287	3.622	0.276	0.74
699	ARL13B_KAN512-15_6.tif:0001-0098	0.78	322.1	200	488	101.061	15.84	0.509	251.253	9663	3.541	0.282	0.706	0.256		0.810586		705	Ac-Tub_KAN512-15_6.tif:0001-0098	0.78	397.367	0	1127	101.061	15.84	0.509	309.965	11921	3.541	0.282	0.706
700	ARL13B_KAN512-15_6.tif:0002-0168	1.144	370.977	26	1125	184.558	27.105	0.76	424.424	16323	2.282	0.438	0.846	0.432441		181.367		706	Ac-Tub_KAN512-15_6.tif:0002-0168	1.144	2.045	0	10	184.558	27.105	0.76	2.34	90	2.282	0.438	0.846
701	ARL13B_KAN512-15_6.tif:0003-0226	0.91	299.229	204	455	131.748	36.449	0.569	272.314	10473	3.141	0.318	0.714	0.277459		1.00316		707	Ac-Tub_KAN512-15_6.tif:0003-0226	0.91	298.286	0	862	131.748	36.449	0.569	271.456	10440	3.141	0.318	0.714
702	ARL13B_KAN512-15_6.tif:0004-0271	1.352	609.192	201	1395	72.866	43.689	0.592	823.678	31678	3.152	0.317	0.806	0.839238		1.58779		708	Ac-Tub_KAN512-15_6.tif:0004-0271	1.352	383.673	0	1810	72.866	43.689	0.592	518.757	19951	3.152	0.317	0.806
703	ARL13B_KAN512-15_6.tif:0005-0587	1.456	505.268	190	979	211.111	94.613	0.56	735.714	28295	3.773	0.265	0.772	0.749613		1.28316		709	Ac-Tub_KAN512-15_6.tif:0005-0587	1.456	393.768	0	1545	211.111	94.613	0.56	573.361	22051	3.773	0.265	0.772
704	ARL13B_KAN512-15_6.tif:0006-0668	0.286	228.182	195	280	24.679	107.781	0.448	65.264	2510	4.527	0.221	0.611	0.0664968		0.412897		710	Ac-Tub_KAN512-15_6.tif:0006-0668	0.286	552.636	146	1297	24.679	107.781	0.448	158.064	6079	4.527	0.221	0.611
										25127.9				0.665708		#DIV/0!
																#DIV/0!
																#DIV/0!
																#DIV/0!
711	ARL13B_KAN512-16_1.tif:0001-0101	1.898	1321.82	215	3853	112.068	16.243	0.684	2508.97	96493	2.275	0.439	0.789	2.55637		1.46319		720	Ac-Tub_KAN512-16_1.tif:0001-0101	1.898	903.384	0	3143	112.068	16.243	0.684	1714.72	65947	2.275	0.439	0.789
712	ARL13B_KAN512-16_1.tif:0002-0118	1.742	721.94	194	1694	37.799	19.077	0.727	1257.7	48370	2.113	0.473	0.827	1.28146		0.823305		721	Ac-Tub_KAN512-16_1.tif:0002-0118	1.742	876.881	122	1962	37.799	19.077	0.727	1527.62	58751	2.113	0.473	0.827
713	ARL13B_KAN512-16_1.tif:0003-0217	1.248	453.688	191	1003	22.884	34.951	0.372	566.236	21777	5.543	0.18	0.681	0.576933		1.30926		722	Ac-Tub_KAN512-16_1.tif:0003-0217	1.248	346.521	63	1209	22.884	34.951	0.372	432.484	16633	5.543	0.18	0.681
714	ARL13B_KAN512-16_1.tif:0004-0564	1.066	299.341	139	525	120.015	90.896	0.427	319.117	12273	5.189	0.193	0.82	0.325146		0.432057		723	Ac-Tub_KAN512-16_1.tif:0004-0564	1.066	692.829	135	1296	120.015	90.896	0.427	738.6	28406	5.189	0.193	0.82
715	ARL13B_KAN512-16_1.tif:0005-0594	2.652	595.167	194	1670	68.152	95.858	0.537	1578.48	60707	3.571	0.28	0.806	1.6083		1.68299		724	Ac-Tub_KAN512-16_1.tif:0005-0594	2.652	353.637	0	1753	68.152	95.858	0.537	937.902	36071	3.571	0.28	0.806
716	ARL13B_KAN512-16_1.tif:0006-0627	0.52	249	191	310	156.525	101.063	0.698	129.488	4980	2.702	0.37	0.8	0.131934		0.559991		725	Ac-Tub_KAN512-16_1.tif:0006-0627	0.52	444.65	94	780	156.525	101.063	0.698	231.232	8893	2.702	0.37	0.8
717	ARL13B_KAN512-16_1.tif:0007-0721	1.716	422.939	190	774	26.836	116.342	0.741	725.808	27914	2.435	0.411	0.863	0.739519		0.734019		726	Ac-Tub_KAN512-16_1.tif:0007-0721	1.716	576.197	121	1256	26.836	116.342	0.741	988.814	38029	2.435	0.411	0.863
718	ARL13B_KAN512-16_1.tif:0008-0843	1.508	737.31	207	2094	189.908	135.87	0.442	1111.93	42764	4.433	0.226	0.72	1.13294		3.01771		727	Ac-Tub_KAN512-16_1.tif:0008-0843	1.508	244.328	0	1016	189.908	135.87	0.442	368.468	14171	4.433	0.226	0.72
719	ARL13B_KAN512-16_1.tif:0009-0911	2.678	573.796	199	1624	202.554	146.914	0.716	1536.72	59101	2.586	0.387	0.855	1.56575		1.27803		728	Ac-Tub_KAN512-16_1.tif:0009-0911	2.678	448.971	0	3043	202.554	146.914	0.716	1202.42	46244	2.586	0.387	0.855
729	ARL13B_KAN512-16_2.tif:0001-0025	0.702	198.074	150	276	122.87	4.118	0.395	139.056	5348	5.293	0.189	0.692	0.141683		1.25924		740	Ac-Tub_KAN512-16_2.tif:0001-0025	0.702	157.296	0	349	122.87	4.118	0.395	110.429	4247	5.293	0.189	0.692
730	ARL13B_KAN512-16_2.tif:0002-0069	0.78	209.4	161	242	159.148	11.18	0.468	163.342	6282	3.085	0.324	0.69	0.166428		1.52033		741	Ac-Tub_KAN512-16_2.tif:0002-0069	0.78	137.733	63	265	159.148	11.18	0.468	107.438	4132	3.085	0.324	0.69
731	ARL13B_KAN512-16_2.tif:0003-0090	2.21	669.918	198	1783	204.219	14.551	0.568	1480.61	56943	3.755	0.266	0.837	1.50858		3.64715		742	Ac-Tub_KAN512-16_2.tif:0003-0090	2.21	183.682	0	1338	204.219	14.551	0.568	405.962	15613	3.755	0.266	0.837
732	ARL13B_KAN512-16_2.tif:0004-0105	0.858	215.97	102	335	186.222	17.012	0.401	185.313	7127	3.325	0.301	0.667	0.188814		6.3862		743	Ac-Tub_KAN512-16_2.tif:0004-0105	0.858	33.818	0	178	186.222	17.012	0.401	29.018	1116	3.325	0.301	0.667
733	ARL13B_KAN512-16_2.tif:0005-0119	2.678	500.835	196	952	14.79	19.396	0.457	1341.32	51586	4.069	0.246	0.814	1.36666		1.28043		744	Ac-Tub_KAN512-16_2.tif:0005-0119	2.678	391.146	2	882	14.79	19.396	0.457	1047.55	40288	4.069	0.246	0.814
734	ARL13B_KAN512-16_2.tif:0006-0150	1.664	687.266	190	1511	43.842	24.18	0.49	1143.68	43985	3.983	0.251	0.727	1.16528		3.20427		745	Ac-Tub_KAN512-16_2.tif:0006-0150	1.664	214.484	0	1560	43.842	24.18	0.49	356.923	13727	3.983	0.251	0.727
735	ARL13B_KAN512-16_2.tif:0007-0225	0.78	301.333	198	481	17.474	36.335	0.577	235.054	9040	3.312	0.302	0.759	0.239495		1.01963		746	Ac-Tub_KAN512-16_2.tif:0007-0225	0.78	295.533	117	599	17.474	36.335	0.577	230.53	8866	3.312	0.302	0.759
736	ARL13B_KAN512-16_2.tif:0008-0559	2.34	432.211	186	873	62.631	90.196	0.574	1011.43	38899	3.366	0.297	0.833	1.03054		2.09823		747	Ac-Tub_KAN512-16_2.tif:0008-0559	2.34	205.989	0	730	62.631	90.196	0.574	482.043	18539	3.366	0.297	0.833
737	ARL13B_KAN512-16_2.tif:0009-0662	0.52	189.95	110	323	188.646	106.828	0.553	98.78	3799	3.724	0.269	0.727	0.100646		13.9669		748	Ac-Tub_KAN512-16_2.tif:0009-0662	0.52	13.6	0	71	188.646	106.828	0.553	7.072	272	3.724	0.269	0.727
738	ARL13B_KAN512-16_2.tif:0010-0869	0.806	448.677	196	807	70.812	140.17	0.608	361.656	13909	3.219	0.311	0.849	0.368488		3.51326		749	Ac-Tub_KAN512-16_2.tif:0010-0869	0.806	127.71	0	477	70.812	140.17	0.608	102.94	3959	3.219	0.311	0.849
739	ARL13B_KAN512-16_2.tif:0011-0954	1.846	333.296	191	651	32.303	153.863	0.583	615.301	23664	3.124	0.32	0.785	0.626925		0.59129		750	Ac-Tub_KAN512-16_2.tif:0011-0954	1.846	563.676	0	1946	32.303	153.863	0.583	1040.61	40021	3.124	0.32	0.785
751	ARL13B_KAN512-16_3.tif:0001-0006	0.78	495.967	195	1017	1.312	1	0.679	386.877	14879	1.969	0.508	0.741	0.394186		0.763809		763	Ac-Tub_KAN512-16_3.tif:0001-0006	0.78	649.333	49	1402	1.312	1	0.679	506.511	19480	1.969	0.508	0.741
752	ARL13B_KAN512-16_3.tif:0002-0120	2.158	447.181	190	804	117.358	19.221	0.69	965.074	37116	2.451	0.408	0.856	0.983306		0.94215		764	Ac-Tub_KAN512-16_3.tif:0002-0120	2.158	474.639	0	1475	117.358	19.221	0.69	1024.33	39395	2.451	0.408	0.856
753	ARL13B_KAN512-16_3.tif:0003-0176	1.118	339.372	52	648	41.222	28.142	0.299	379.441	14593	4.469	0.224	0.521	0.386609		2.34012		765	Ac-Tub_KAN512-16_3.tif:0003-0176	1.118	145.023	0	635	41.222	28.142	0.299	162.146	6236	4.469	0.224	0.521
754	ARL13B_KAN512-16_3.tif:0004-0188	2.418	1225.54	201	3140	178.076	30.227	0.646	2963.53	113975	2.685	0.372	0.802	3.01951		3.61596		766	Ac-Tub_KAN512-16_3.tif:0004-0188	2.418	338.925	0	2355	178.076	30.227	0.646	819.569	31520	2.685	0.372	0.802
755	ARL13B_KAN512-16_3.tif:0005-0305	1.716	586.742	190	1061	126.955	49.274	0.647	1006.91	38725	2.757	0.363	0.852	1.02593		1.01274		767	Ac-Tub_KAN512-16_3.tif:0005-0305	1.716	579.364	0	1948	126.955	49.274	0.647	994.248	38238	2.757	0.363	0.852
756	ARL13B_KAN512-16_3.tif:0006-0470	0.91	320.057	190	508	21.628	75.808	0.528	291.27	11202	4.016	0.249	0.722	0.296772		1.74269		768	Ac-Tub_KAN512-16_3.tif:0006-0470	0.91	183.657	0	847	21.628	75.808	0.528	167.138	6428	4.016	0.249	0.722
757	ARL13B_KAN512-16_3.tif:0007-0614	0.936	312.111	206	441	6.499	98.999	0.726	292.154	11236	2.485	0.402	0.8	0.297673		0.600663		769	Ac-Tub_KAN512-16_3.tif:0007-0614	0.936	519.611	15	1738	6.499	98.999	0.726	486.385	18706	2.485	0.402	0.8
758	ARL13B_KAN512-16_3.tif:0008-0693	3.25	616.944	190	1620	154.99	111.713	0.69	2005.19	77118	2.641	0.379	0.896	2.04307		0.886169		770	Ac-Tub_KAN512-16_3.tif:0008-0693	3.25	696.192	0	2233	154.99	111.713	0.69	2262.76	87024	2.641	0.379	0.896
759	ARL13B_KAN512-16_3.tif:0009-0850	1.664	692.297	204	1391	100.958	137.118	0.476	1152.05	44307	4.398	0.227	0.744	1.17382		1.49706		771	Ac-Tub_KAN512-16_3.tif:0009-0850	1.664	462.438	0	2004	100.958	137.118	0.476	769.542	29596	4.398	0.227	0.744
760	ARL13B_KAN512-16_3.tif:0010-0878	1.534	652.203	200	1322	213.893	141.565	0.718	1000.54	38480	2.551	0.392	0.929	1.01944		2.53943		772	Ac-Tub_KAN512-16_3.tif:0010-0878	1.534	256.831	0	1005	213.893	141.565	0.718	394.002	15153	2.551	0.392	0.929
761	ARL13B_KAN512-16_3.tif:0011-0902	1.95	386.64	192	628	61.579	145.496	0.75	753.993	28998	2.087	0.479	0.829	0.768237		1.04637		773	Ac-Tub_KAN512-16_3.tif:0011-0902	1.95	369.507	0	1276	61.579	145.496	0.75	720.581	27713	2.087	0.479	0.829
762	ARL13B_KAN512-16_3.tif:0012-0916	2.574	1003.19	179	2502	10.12	147.659	0.547	2582.37	99316	3.214	0.311	0.762	2.63116		0.815777		774	Ac-Tub_KAN512-16_3.tif:0012-0916	2.574	1229.74	3	3574	10.12	147.659	0.547	3165.53	121744	3.214	0.311	0.762
775	ARL13B_KAN512-16_4.tif:0001-0007	0.936	474.167	208	910	44.908	1.093	0.638	443.847	17070	2.923	0.342	0.783	0.452232		5.26689		785	Ac-Tub_KAN512-16_4.tif:0001-0007	0.936	90.028	0	642	44.908	1.093	0.638	84.271	3241	2.923	0.342	0.783
776	ARL13B_KAN512-16_4.tif:0002-0036	2.6	747.62	194	1785	38.603	5.866	0.752	1943.93	74762	2.243	0.446	0.889	1.98065		2.03263		786	Ac-Tub_KAN512-16_4.tif:0002-0036	2.6	367.81	0	1128	38.603	5.866	0.752	956.364	36781	2.243	0.446	0.889
777	ARL13B_KAN512-16_4.tif:0003-0102	3.172	830.803	201	2080	113.669	16.602	0.391	2635.47	101358	5.743	0.174	0.803	2.68525		1.19923		787	Ac-Tub_KAN512-16_4.tif:0003-0102	3.172	692.779	0	2744	113.669	16.602	0.391	2197.63	84519	5.743	0.174	0.803
778	ARL13B_KAN512-16_4.tif:0004-0248	1.612	670.484	130	2117	159.344	40.008	0.692	1080.88	41570	2.639	0.379	0.873	1.1013		0.842726		788	Ac-Tub_KAN512-16_4.tif:0004-0248	1.612	795.613	29	2563	159.344	40.008	0.692	1282.61	49328	2.639	0.379	0.873
779	ARL13B_KAN512-16_4.tif:0005-0559	1.43	366.545	193	621	173.773	90.117	0.463	524.192	20160	4.226	0.237	0.743	0.534094		0.335759		789	Ac-Tub_KAN512-16_4.tif:0005-0559	1.43	1091.69	16	2461	173.773	90.117	0.463	1561.21	60043	4.226	0.237	0.743
780	ARL13B_KAN512-16_4.tif:0006-0658	1.846	633.789	190	1418	133.098	106.156	0.497	1170.04	44999	4.012	0.249	0.768	1.19215		6.17524		790	Ac-Tub_KAN512-16_4.tif:0006-0658	1.846	102.634	0	731	133.098	106.156	0.497	189.473	7287	4.012	0.249	0.768
781	ARL13B_KAN512-16_4.tif:0007-0668	2.366	824.033	190	1694	91.913	107.675	0.59	1949.78	74987	3.111	0.321	0.824	1.98661		2.79208		791	Ac-Tub_KAN512-16_4.tif:0007-0668	2.366	295.132	0	1498	91.913	107.675	0.59	698.324	26857	3.111	0.321	0.824
782	ARL13B_KAN512-16_4.tif:0008-0771	1.716	564.697	196	1177	122.594	124.334	0.491	969.078	37270	4.077	0.245	0.754	0.987385		2.94485		792	Ac-Tub_KAN512-16_4.tif:0008-0771	1.716	191.758	0	1231	122.594	124.334	0.491	329.076	12656	4.077	0.245	0.754
783	ARL13B_KAN512-16_4.tif:0009-0818	2.106	845.79	193	2463	167.028	131.951	0.567	1781.34	68509	3.392	0.295	0.839	1.81499		9.76747		793	Ac-Tub_KAN512-16_4.tif:0009-0818	2.106	86.593	0	619	167.028	131.951	0.567	182.375	7014	3.392	0.295	0.839
784	ARL13B_KAN512-16_4.tif:0010-0988	1.326	801.098	192	1994	108.422	159.329	0.699	1062.32	40856	2.633	0.38	0.829	1.08239		1.37897		794	Ac-Tub_KAN512-16_4.tif:0010-0988	1.326	580.941	0	2459	108.422	159.329	0.699	770.374	29628	2.633	0.38	0.829
795	ARL13B_KAN512-16_5.tif:0001-0081	1.508	458.534	191	859	202.574	13.025	0.789	691.512	26595	1.568	0.638	0.847	0.704575		1.06478		809	Ac-Tub_KAN512-16_5.tif:0001-0081	1.508	430.638	0	2493	202.574	13.025	0.789	649.441	24977	1.568	0.638	0.847
796	ARL13B_KAN512-16_5.tif:0002-0118	2.574	382.889	85	859	121.362	19.19	0.352	985.615	37906	5.545	0.18	0.653	1.00423		0.716451		810	Ac-Tub_KAN512-16_5.tif:0002-0118	2.574	534.424	0	2814	121.362	19.19	0.352	1375.69	52908	5.545	0.18	0.653
797	ARL13B_KAN512-16_5.tif:0003-0200	1.95	371.133	192	661	177.593	32.262	0.621	723.754	27835	2.938	0.34	0.857	0.737426		0.787746		811	Ac-Tub_KAN512-16_5.tif:0003-0200	1.95	471.133	0	1659	177.593	32.262	0.621	918.765	35335	2.938	0.34	0.857
798	ARL13B_KAN512-16_5.tif:0004-0391	1.066	203.439	91	280	36.897	63.133	0.488	216.879	8341	4.701	0.213	0.965	0.220976		1.59149		812	Ac-Tub_KAN512-16_5.tif:0004-0391	1.066	127.829	0	889	36.897	63.133	0.488	136.274	5241	4.701	0.213	0.965
799	ARL13B_KAN512-16_5.tif:0005-0394	1.742	456.896	195	866	160.041	63.502	0.763	795.96	30612	2.178	0.459	0.893	0.810997		0.566857		813	Ac-Tub_KAN512-16_5.tif:0005-0394	1.742	806.015	61	1396	160.041	63.502	0.763	1404.16	54003	2.178	0.459	0.893
800	ARL13B_KAN512-16_5.tif:0006-0425	1.586	333.852	190	700	209.663	68.599	0.648	529.522	20365	2.933	0.341	0.878	0.539525		0.54109		814	Ac-Tub_KAN512-16_5.tif:0006-0425	1.586	617	3	1454	209.663	68.599	0.648	978.621	37637	2.933	0.341	0.878
801	ARL13B_KAN512-16_5.tif:0007-0437	0.468	263.444	55	488	57.943	70.439	0.416	123.299	4742	3.216	0.311	0.632	0.125629		42.7207		815	Ac-Tub_KAN512-16_5.tif:0007-0437	0.468	6.167	0	26	57.943	70.439	0.416	2.886	111	3.216	0.311	0.632
802	ARL13B_KAN512-16_5.tif:0008-0450	0.832	313.125	192	660	44.092	72.416	0.29	260.536	10020	5.625	0.178	0.566	0.265458		122.195		816	Ac-Tub_KAN512-16_5.tif:0008-0450	0.832	2.562	0	12	44.092	72.416	0.29	2.132	82	5.625	0.178	0.566
803	ARL13B_KAN512-16_5.tif:0009-0508	1.56	508.917	193	998	141.182	81.928	0.62	793.958	30535	3.182	0.314	0.828	0.808957		0.844325		817	Ac-Tub_KAN512-16_5.tif:0009-0508	1.56	602.75	0	1527	141.182	81.928	0.62	940.347	36165	3.182	0.314	0.828
804	ARL13B_KAN512-16_5.tif:0010-0555	0.988	604.763	196	1220	97.446	89.587	0.645	597.542	22981	2.54	0.394	0.784	0.60883		9.00509		818	Ac-Tub_KAN512-16_5.tif:0010-0555	0.988	67.158	0	671	97.446	89.587	0.645	66.356	2552	2.54	0.394	0.784
805	ARL13B_KAN512-16_5.tif:0011-0721	1.456	391.75	141	716	79.171	116.238	0.571	570.422	21938	3.953	0.253	0.824	0.581198		0.698529		819	Ac-Tub_KAN512-16_5.tif:0011-0721	1.456	560.821	0	1811	79.171	116.238	0.571	816.605	31406	3.953	0.253	0.824
806	ARL13B_KAN512-16_5.tif:0012-0733	3.328	398.891	22	984	75.226	118.342	0.205	1327.59	51058	6.038	0.166	0.473	1.35267		1.03371		820	Ac-Tub_KAN512-16_5.tif:0012-0733	3.328	385.883	0	1475	75.226	118.342	0.205	1284.3	49393	6.038	0.166	0.473
807	ARL13B_KAN512-16_5.tif:0013-0950	3.146	503.645	190	1271	149.293	153.304	0.492	1584.56	60941	3.705	0.27	0.771	1.6145		1.3031		821	Ac-Tub_KAN512-16_5.tif:0013-0950	3.146	386.496	0	1981	149.293	153.304	0.492	1215.99	46766	3.705	0.27	0.771
808	ARL13B_KAN512-16_5.tif:0014-0981	2.002	660.338	192	1867	20.39	158.307	0.372	1322.08	50846	5.354	0.187	0.672	1.34705		2.23637		822	Ac-Tub_KAN512-16_5.tif:0014-0981	2.002	295.273	0	1425	20.39	158.307	0.372	591.172	22736	5.354	0.187	0.672
823	ARL13B_KAN512-16_6.tif:0001-0008	1.742	796.045	194	1863	118.438	1.262	0.737	1386.79	53335	2	0.5	0.87	1.41299		2.09469		830	Ac-Tub_KAN512-16_6.tif:0001-0008	1.742	380.03	0	2321	118.438	1.262	0.737	662.052	25462	2	0.5	0.87
824	ARL13B_KAN512-16_6.tif:0002-0265	1.638	285.016	64	556	73.012	42.72	0.235	466.884	17956	9.081	0.11	0.592	0.475704		0.509607		831	Ac-Tub_KAN512-16_6.tif:0002-0265	1.638	559.286	30	2086	73.012	42.72	0.235	916.165	35235	9.081	0.11	0.592
825	ARL13B_KAN512-16_6.tif:0003-0376	1.56	446.367	162	944	65.656	60.611	0.577	696.374	26782	3.444	0.29	0.876	0.709529		2.39275		832	Ac-Tub_KAN512-16_6.tif:0003-0376	1.56	186.55	0	857	65.656	60.611	0.577	291.036	11193	3.444	0.29	0.876
826	ARL13B_KAN512-16_6.tif:0004-0372	0.286	226.818	177	298	159.381	59.978	0.659	64.874	2495	3.246	0.308	0.759	0.0660995		0.67396		833	Ac-Tub_KAN512-16_6.tif:0004-0372	0.286	336.545	147	553	159.381	59.978	0.659	96.258	3702	3.246	0.308	0.759
827	ARL13B_KAN512-16_6.tif:0005-0520	1.638	449.206	193	837	24.163	84.046	0.755	735.844	28300	2.127	0.47	0.881	0.749745		1.41112		834	Ac-Tub_KAN512-16_6.tif:0005-0520	1.638	318.333	9	660	24.163	84.046	0.755	521.461	20055	2.127	0.47	0.881
828	ARL13B_KAN512-16_6.tif:0006-0604	1.872	401.764	186	995	220.368	97.355	0.567	752.147	28927	3.309	0.302	0.742	0.766356		1.74532		835	Ac-Tub_KAN512-16_6.tif:0006-0604	1.872	230.194	0	751	220.368	97.355	0.567	430.95	16574	3.309	0.302	0.742
829	ARL13B_KAN512-16_6.tif:0007-0952	2.028	446.359	200	841	72.73	153.52	0.415	905.271	34816	5	0.2	0.739	0.922372		1.27414		836	Ac-Tub_KAN512-16_6.tif:0007-0952	2.028	350.321	0	1526	72.73	153.52	0.415	710.493	27325	5	0.2	0.739
										36250.4				0.960372		#DIV/0!
																#DIV/0!
																#DIV/0!
																#DIV/0!
837	ARL13B_KAN512-17_1.tif:0001-0049	2.6	532.97	166	1304	160.054	7.966	0.731	1385.81	53297	2.045	0.489	0.84	1.41199		0.662527		848	Ac-Tub_KAN512-17_1.tif:0001-0049	2.6	804.45	0	3000	160.054	7.966	0.731	2091.7	80445	2.045	0.489	0.84
838	ARL13B_KAN512-17_1.tif:0002-0130	1.898	420.219	199	1049	34.88	21.129	0.441	797.624	30676	5.025	0.199	0.737	0.812692		1.38168		849	Ac-Tub_KAN512-17_1.tif:0002-0130	1.898	304.137	0	1331	34.88	21.129	0.441	577.287	22202	5.025	0.199	0.737
839	ARL13B_KAN512-17_1.tif:0003-0212	1.482	528.912	199	864	1.181	34.045	0.441	783.895	30148	4.34	0.23	0.765	0.798704		1.03555		850	Ac-Tub_KAN512-17_1.tif:0003-0212	1.482	510.754	38	1161	1.181	34.045	0.441	756.984	29113	4.34	0.23	0.765
840	ARL13B_KAN512-17_1.tif:0004-0227	1.482	551.772	194	1284	140.099	36.642	0.489	817.775	31451	4.143	0.241	0.755	0.833224		0.950698		851	Ac-Tub_KAN512-17_1.tif:0004-0227	1.482	580.386	0	2700	140.099	36.642	0.489	860.184	33082	4.143	0.241	0.755
841	ARL13B_KAN512-17_1.tif:0005-0300	2.522	567.464	206	1452	84.858	48.392	0.682	1431.23	55044	2.436	0.411	0.858	1.45827		1.99877		852	Ac-Tub_KAN512-17_1.tif:0005-0300	2.522	283.907	0	991	84.858	48.392	0.682	716.057	27539	2.436	0.411	0.858
842	ARL13B_KAN512-17_1.tif:0006-0385	1.196	506.935	192	1198	49.637	62.141	0.513	606.331	23319	3.922	0.255	0.786	0.617785		1.0163		853	Ac-Tub_KAN512-17_1.tif:0006-0385	1.196	498.804	0	1826	49.637	62.141	0.513	596.606	22945	3.922	0.255	0.786
843	ARL13B_KAN512-17_1.tif:0007-0399	1.378	669.34	162	1408	214.123	64.447	0.645	922.406	35475	2.884	0.347	0.848	0.939831		0.715871		854	Ac-Tub_KAN512-17_1.tif:0007-0399	1.378	935	141	2197	214.123	64.447	0.645	1288.51	49555	2.884	0.347	0.848
844	ARL13B_KAN512-17_1.tif:0008-0514	2.418	627.548	191	1445	101.072	83.039	0.469	1517.5	58362	4.148	0.241	0.744	1.54617		0.903451		855	Ac-Tub_KAN512-17_1.tif:0008-0514	2.418	694.613	46	2469	101.072	83.039	0.469	1679.67	64599	4.148	0.241	0.744
845	ARL13B_KAN512-17_1.tif:0009-0582	1.742	839.567	193	2672	86.537	93.856	0.64	1462.61	56251	2.586	0.387	0.798	1.49024		0.802005		856	Ac-Tub_KAN512-17_1.tif:0009-0582	1.742	1046.84	108	2659	86.537	93.856	0.64	1823.7	70138	2.586	0.387	0.798
846	ARL13B_KAN512-17_1.tif:0010-0776	2.262	1107.01	191	3304	126.964	125.144	0.537	2504.21	96310	3.773	0.265	0.798	2.55152		2.38977		857	Ac-Tub_KAN512-17_1.tif:0010-0776	2.262	463.23	0	1672	126.964	125.144	0.537	1047.89	40301	3.773	0.265	0.798
847	ARL13B_KAN512-17_1.tif:0011-0818	1.222	346.511	193	566	203.314	131.976	0.692	423.461	16286	2.612	0.383	0.847	0.431461		0.712891		858	Ac-Tub_KAN512-17_1.tif:0011-0818	1.222	486.064	0	1573	203.314	131.976	0.692	594.006	22845	2.612	0.383	0.847
859	ARL13B_KAN512-17_2.tif:0001-0194	2.054	537.861	205	1436	61.156	31.408	0.609	1104.83	42491	3.197	0.313	0.863	1.1257		0.958386		873	Ac-Tub_KAN512-17_2.tif:0001-0194	2.054	561.215	0	2260	61.156	31.408	0.609	1152.81	44336	3.197	0.313	0.863
860	ARL13B_KAN512-17_2.tif:0002-0255	0.962	609.676	194	1649	87.84	41.064	0.798	586.543	22558	1.788	0.559	0.831	0.597624		5.18813		874	Ac-Tub_KAN512-17_2.tif:0002-0255	0.962	117.514	0	752	87.84	41.064	0.798	113.055	4348	1.788	0.559	0.831
861	ARL13B_KAN512-17_2.tif:0003-0293	1.898	704.767	198	2498	159.544	47.349	0.43	1337.73	51448	4.999	0.2	0.699	1.363		1.55979		875	Ac-Tub_KAN512-17_2.tif:0003-0293	1.898	451.836	0	2382	159.544	47.349	0.43	857.636	32984	4.999	0.2	0.699
862	ARL13B_KAN512-17_2.tif:0004-0296	0.598	224.174	131	300	86.553	47.951	0.26	134.064	5156	7.932	0.126	0.597	0.136597		0.541085		876	Ac-Tub_KAN512-17_2.tif:0004-0296	0.598	414.304	41	1126	86.553	47.951	0.26	247.769	9529	7.932	0.126	0.597
863	ARL13B_KAN512-17_2.tif:0005-0344	1.456	341.125	190	575	95.52	55.484	0.616	496.708	19103	2.704	0.37	0.818	0.506091		0.845153		877	Ac-Tub_KAN512-17_2.tif:0005-0344	1.456	403.625	27	1398	95.52	55.484	0.616	587.713	22603	2.704	0.37	0.818
864	ARL13B_KAN512-17_2.tif:0006-0469	1.846	654.972	186	1666	192.6	75.489	0.573	1209.15	46503	2.496	0.401	0.714	1.23199		0.8984		878	Ac-Tub_KAN512-17_2.tif:0006-0469	1.846	729.042	0	3578	192.6	75.489	0.573	1345.89	51762	2.496	0.401	0.714
865	ARL13B_KAN512-17_2.tif:0007-0495	1.976	819.118	191	2176	38.097	79.887	0.562	1618.67	62253	3.45	0.29	0.8	1.64925		1.48179		879	Ac-Tub_KAN512-17_2.tif:0007-0495	1.976	552.789	1	1722	38.097	79.887	0.562	1092.38	42012	3.45	0.29	0.8
866	ARL13B_KAN512-17_2.tif:0008-0558	2.782	436.308	125	983	107.148	89.972	0.485	1213.88	46685	4.018	0.249	0.781	1.23681		0.502865		880	Ac-Tub_KAN512-17_2.tif:0008-0558	2.782	867.645	6	2112	107.148	89.972	0.485	2413.93	92838	4.018	0.249	0.781
867	ARL13B_KAN512-17_2.tif:0009-0625	2.054	532.443	195	1086	88.003	100.905	0.509	1093.7	42063	4.057	0.246	0.883	1.11437		0.995362		881	Ac-Tub_KAN512-17_2.tif:0009-0625	2.054	534.924	0	1928	88.003	100.905	0.509	1098.8	42259	4.057	0.246	0.883
868	ARL13B_KAN512-17_2.tif:0010-0737	1.742	917.149	190	3231	191.063	118.886	0.775	1597.77	61449	1.723	0.58	0.882	1.62795		0.861874		882	Ac-Tub_KAN512-17_2.tif:0010-0737	1.742	1064.13	0	3279	191.063	118.886	0.775	1853.83	71297	1.723	0.58	0.882
869	ARL13B_KAN512-17_2.tif:0011-0765	1.768	894.324	204	2282	128.571	123.408	0.68	1581.26	60814	2.453	0.408	0.85	1.61113		1.55794		883	Ac-Tub_KAN512-17_2.tif:0011-0765	1.768	574.044	25	2196	128.571	123.408	0.68	1014.97	39035	2.453	0.408	0.85
870	ARL13B_KAN512-17_2.tif:0012-0786	1.95	634.12	107	1613	77.814	126.709	0.712	1236.61	47559	2.359	0.424	0.867	1.25997		1.03163		884	Ac-Tub_KAN512-17_2.tif:0012-0786	1.95	614.68	0	2234	77.814	126.709	0.712	1198.7	46101	2.359	0.424	0.867
871	ARL13B_KAN512-17_2.tif:0013-0881	1.794	654.275	164	1420	79.899	142.126	0.571	1173.84	45145	3.358	0.298	0.847	1.19602		1.13853		885	Ac-Tub_KAN512-17_2.tif:0013-0881	1.794	574.667	0	2186	79.899	142.126	0.571	1031.01	39652	3.358	0.298	0.847
872	ARL13B_KAN512-17_2.tif:0014-0958	1.326	465.863	203	851	6.695	154.609	0.658	617.771	23759	2.789	0.359	0.816	0.629442		0.583874		886	Ac-Tub_KAN512-17_2.tif:0014-0958	1.326	797.882	250	1463	6.695	154.609	0.658	1058.06	40692	2.789	0.359	0.816
887	ARL13B_KAN512-17_3.tif:0001-0088	2.08	386.45	190	667	149.326	14.234	0.704	803.864	30916	2.622	0.381	0.865	0.81905		0.68658		902	Ac-Tub_KAN512-17_3.tif:0001-0088	2.08	562.862	0	1361	149.326	14.234	0.704	1170.83	45029	2.622	0.381	0.865
888	ARL13B_KAN512-17_3.tif:0002-0164	2.496	735.354	120	1727	193.964	26.445	0.541	1835.56	70594	3.528	0.283	0.787	1.87023		0.686345		903	Ac-Tub_KAN512-17_3.tif:0002-0164	2.496	1071.41	0	3460	193.964	26.445	0.541	2674.39	102855	3.528	0.283	0.787
889	ARL13B_KAN512-17_3.tif:0003-0349	1.82	718.886	191	1434	28.11	56.329	0.482	1308.45	50322	4.74	0.211	0.859	1.33317		2.0296		904	Ac-Tub_KAN512-17_3.tif:0003-0349	1.82	354.2	0	1193	28.11	56.329	0.482	644.683	24794	4.74	0.211	0.859
890	ARL13B_KAN512-17_3.tif:0004-0410	1.872	525.764	138	1023	179.005	66.294	0.776	984.289	37855	2.056	0.486	0.917	1.00288		1.38826		905	Ac-Tub_KAN512-17_3.tif:0004-0410	1.872	378.722	0	1137	179.005	66.294	0.776	709.011	27268	2.056	0.486	0.917
891	ARL13B_KAN512-17_3.tif:0005-0465	2.158	479.904	109	1012	136.803	75.025	0.621	1035.69	39832	2.833	0.353	0.847	1.05526		0.684222		906	Ac-Tub_KAN512-17_3.tif:0005-0465	2.158	701.386	0	2210	136.803	75.025	0.621	1513.68	58215	2.833	0.353	0.847
892	ARL13B_KAN512-17_3.tif:0006-0531	2.106	669.457	191	2232	102.032	85.565	0.554	1409.96	54226	3.132	0.319	0.827	1.4366		0.672704		907	Ac-Tub_KAN512-17_3.tif:0006-0531	2.106	995.173	0	3260	102.032	85.565	0.554	2095.96	80609	3.132	0.319	0.827
893	ARL13B_KAN512-17_3.tif:0007-0538	2.08	532.987	194	1062	53.339	86.855	0.588	1108.68	42639	3.675	0.272	0.825	1.12963		0.846062		908	Ac-Tub_KAN512-17_3.tif:0007-0538	2.08	629.962	0	2604	53.339	86.855	0.588	1310.4	50397	3.675	0.272	0.825
894	ARL13B_KAN512-17_3.tif:0008-0659	3.068	680.949	144	1640	169.586	106.422	0.48	2089.28	80352	4.657	0.215	0.891	2.12875		0.852188		909	Ac-Tub_KAN512-17_3.tif:0008-0659	3.068	799.059	0	3316	169.586	106.422	0.48	2451.66	94289	4.657	0.215	0.891
895	ARL13B_KAN512-17_3.tif:0009-0675	0.494	225.105	161	279	133.103	108.806	0.624	111.209	4277	2.089	0.479	0.704	0.11331		0.197169		910	Ac-Tub_KAN512-17_3.tif:0009-0675	0.494	1141.68	228	1929	133.103	108.806	0.624	564.026	21692	2.089	0.479	0.704
896	ARL13B_KAN512-17_3.tif:0010-0781	1.664	460.031	192	893	101.137	126.042	0.539	765.538	29442	3.485	0.287	0.771	0.78		1.02411		911	Ac-Tub_KAN512-17_3.tif:0010-0781	1.664	449.203	0	1638	101.137	126.042	0.539	747.519	28749	3.485	0.287	0.771
897	ARL13B_KAN512-17_3.tif:0011-0826	1.508	527.948	195	894	147.269	133.354	0.431	796.194	30621	4.588	0.218	0.703	0.811235		1.92102		912	Ac-Tub_KAN512-17_3.tif:0011-0826	1.508	274.828	0	1090	147.269	133.354	0.431	414.465	15940	4.588	0.218	0.703
898	ARL13B_KAN512-17_3.tif:0012-0829	2.184	446.536	191	880	74.369	133.807	0.329	975.293	37509	7.134	0.14	0.664	0.993717		0.629821		913	Ac-Tub_KAN512-17_3.tif:0012-0829	2.184	708.988	65	2986	74.369	133.807	0.329	1548.52	59555	7.134	0.14	0.664
899	ARL13B_KAN512-17_3.tif:0013-1011	2.132	644.744	196	1486	165.714	163.14	0.548	1374.68	52869	3.866	0.259	0.816	1.40065		0.682269		914	Ac-Tub_KAN512-17_3.tif:0013-1011	2.132	945	0	2016	165.714	163.14	0.548	2014.86	77490	3.866	0.259	0.816
900	ARL13B_KAN512-17_3.tif:0014-1013	1.456	526.839	200	1228	48.182	163.407	0.722	767.124	29503	2.311	0.433	0.824	0.781616		1.0518		915	Ac-Tub_KAN512-17_3.tif:0014-1013	1.456	500.893	0	1278	48.182	163.407	0.722	729.344	28050	2.311	0.433	0.824
901	ARL13B_KAN512-17_3.tif:0015-1014	1.378	663.226	184	1650	71.587	163.622	0.75	913.981	35151	1.759	0.569	0.791	0.931247		0.619739		916	Ac-Tub_KAN512-17_3.tif:0015-1014	1.378	1070.17	61	2986	71.587	163.622	0.75	1474.78	56719	1.759	0.569	0.791
917	ARL13B_KAN512-17_4.tif:0001-0069	1.846	362.169	190	613	12.463	11.077	0.744	668.604	25714	2.239	0.447	0.871	0.681235		2.19328		931	Ac-Tub_KAN512-17_4.tif:0001-0069	1.846	165.127	0	800	12.463	11.077	0.744	304.842	11724	2.239	0.447	0.871
918	ARL13B_KAN512-17_4.tif:0002-0133	2.548	605.714	2	1796	197.48	21.389	0.384	1543.45	59360	5.114	0.196	0.737	1.57261		1.23613		932	Ac-Tub_KAN512-17_4.tif:0002-0133	2.548	490.01	0	2391	197.48	21.389	0.384	1248.62	48021	5.114	0.196	0.737
919	ARL13B_KAN512-17_4.tif:0003-0189	1.742	549.776	209	965	101.538	30.449	0.522	957.768	36835	4.049	0.247	0.838	0.975861		0.640119		933	Ac-Tub_KAN512-17_4.tif:0003-0189	1.742	858.866	86	1771	101.538	30.449	0.522	1496.23	57544	4.049	0.247	0.838
920	ARL13B_KAN512-17_4.tif:0004-0213	1.092	335.929	190	622	4.492	34.365	0.295	366.856	14109	7.312	0.137	0.627	0.373786		1.3624		934	Ac-Tub_KAN512-17_4.tif:0004-0213	1.092	246.571	0	1111	4.492	34.365	0.295	269.272	10356	7.312	0.137	0.627
921	ARL13B_KAN512-17_4.tif:0005-0273	1.69	1085.98	208	2838	195.486	44.067	0.796	1835.42	70589	1.86	0.538	0.855	1.8701		1.43348		935	Ac-Tub_KAN512-17_4.tif:0005-0273	1.69	757.585	0	2766	195.486	44.067	0.796	1280.39	49243	1.86	0.538	0.855
922	ARL13B_KAN512-17_4.tif:0006-0304	2.418	567.86	191	1117	56.908	49.056	0.654	1373.17	52811	2.798	0.357	0.842	1.39911		0.781355		936	Ac-Tub_KAN512-17_4.tif:0006-0304	2.418	726.763	0	1698	56.908	49.056	0.654	1757.42	67589	2.798	0.357	0.842
923	ARL13B_KAN512-17_4.tif:0007-0432	1.014	276.462	190	566	164.552	69.695	0.477	280.349	10782	3.962	0.252	0.667	0.285645		0.634758		937	Ac-Tub_KAN512-17_4.tif:0007-0432	1.014	435.538	0	1486	164.552	69.695	0.477	441.663	16986	3.962	0.252	0.667
924	ARL13B_KAN512-17_4.tif:0008-0559	1.404	422.519	202	894	94.036	90.142	0.484	593.252	22816	4.179	0.239	0.697	0.604459		1.69497		938	Ac-Tub_KAN512-17_4.tif:0008-0559	1.404	249.278	0	1395	94.036	90.142	0.484	350.007	13461	4.179	0.239	0.697
925	ARL13B_KAN512-17_4.tif:0009-0597	1.82	688.629	195	1451	187.511	96.409	0.77	1253.38	48204	2.08	0.481	0.87	1.27706		1.25404		939	Ac-Tub_KAN512-17_4.tif:0009-0597	1.82	549.129	0	1956	187.511	96.409	0.77	999.474	38439	2.08	0.481	0.87
926	ARL13B_KAN512-17_4.tif:0010-0693	1.56	484.317	195	1196	141.623	111.682	0.508	755.579	29059	4.141	0.242	0.741	0.769853		0.938386		940	Ac-Tub_KAN512-17_4.tif:0010-0693	1.56	516.117	72	1791	141.623	111.682	0.508	805.19	30967	4.141	0.242	0.741
927	ARL13B_KAN512-17_4.tif:0011-0762	0.442	228	193	281	165.001	122.925	0.786	100.782	3876	2.467	0.405	0.895	0.102686		2.84164		941	Ac-Tub_KAN512-17_4.tif:0011-0762	0.442	80.235	0	288	165.001	122.925	0.786	35.466	1364	2.467	0.405	0.895
928	ARL13B_KAN512-17_4.tif:0012-0840	1.664	629.047	190	1247	113.533	135.447	0.611	1046.8	40259	3.287	0.304	0.815	1.06657		0.666032		942	Ac-Tub_KAN512-17_4.tif:0012-0840	1.664	944.469	75	2241	113.533	135.447	0.611	1571.69	60446	3.287	0.304	0.815
929	ARL13B_KAN512-17_4.tif:0013-0913	1.352	464.212	177	827	145.178	147.175	0.457	627.652	24139	3.961	0.252	0.693	0.639509		0.744916		943	Ac-Tub_KAN512-17_4.tif:0013-0913	1.352	623.173	9	1421	145.178	147.175	0.457	842.581	32405	3.961	0.252	0.693
930	ARL13B_KAN512-17_4.tif:0014-1008	1.248	554.188	8	1855	65.175	162.59	0.341	691.668	26601	3.817	0.262	0.575	0.704734		0.939301		944	Ac-Tub_KAN512-17_4.tif:0014-1008	1.248	590	20	1707	65.175	162.59	0.341	736.364	28320	3.817	0.262	0.575
945	ARL13B_KAN512-17_5.tif:0001-0038	2.366	559.484	174	1434	114.421	6.134	0.335	1323.82	50913	6.572	0.152	0.743	1.34883		1.26135		959	Ac-Tub_KAN512-17_5.tif:0001-0038	2.366	443.56	0	1310	114.421	6.134	0.335	1049.53	40364	6.572	0.152	0.743
946	ARL13B_KAN512-17_5.tif:0002-0147	1.924	480.108	169	919	201.957	23.826	0.639	923.784	35528	3.231	0.31	0.943	0.941235		7.38781		960	Ac-Tub_KAN512-17_5.tif:0002-0147	1.924	64.986	0	399	201.957	23.826	0.639	125.042	4809	3.231	0.31	0.943
947	ARL13B_KAN512-17_5.tif:0003-0152	1.508	1082.21	193	3061	168.003	24.457	0.772	1632.07	62768	2.263	0.442	0.892	1.6629		2.79939		961	Ac-Tub_KAN512-17_5.tif:0003-0152	1.508	386.586	0	1365	168.003	24.457	0.772	583.007	22422	2.263	0.442	0.892
948	ARL13B_KAN512-17_5.tif:0004-0212	1.846	506.789	195	1107	47.627	34.207	0.421	935.588	35982	4.743	0.211	0.78	0.953263		1.9412		962	Ac-Tub_KAN512-17_5.tif:0004-0212	1.846	261.07	0	1403	47.627	34.207	0.421	481.965	18536	4.743	0.211	0.78
949	ARL13B_KAN512-17_5.tif:0005-0346	1.716	780.485	169	2267	192.635	55.893	0.716	1339.39	51512	2.21	0.452	0.841	1.3647		3.78514		963	Ac-Tub_KAN512-17_5.tif:0005-0346	1.716	206.197	0	1255	192.635	55.893	0.716	353.855	13609	2.21	0.452	0.841
950	ARL13B_KAN512-17_5.tif:0006-0378	1.794	406.725	106	1105	114.348	61.007	0.426	729.708	28064	4.798	0.208	0.676	0.743493		3.02121		964	Ac-Tub_KAN512-17_5.tif:0006-0378	1.794	134.623	0	752	114.348	61.007	0.426	241.529	9289	4.798	0.208	0.676
951	ARL13B_KAN512-17_5.tif:0007-0503	2.652	789.186	197	2853	53.522	81.199	0.491	2093.05	80497	3.392	0.295	0.701	2.13259		0.92972		965	Ac-Tub_KAN512-17_5.tif:0007-0503	2.652	848.843	0	3673	53.522	81.199	0.491	2251.27	86582	3.392	0.295	0.701
952	ARL13B_KAN512-17_5.tif:0008-0567	1.534	580.254	152	1671	178.874	91.578	0.627	890.164	34235	2.977	0.336	0.814	0.90698		0.705149		966	Ac-Tub_KAN512-17_5.tif:0008-0567	1.534	822.881	164	1891	178.874	91.578	0.627	1262.38	48550	2.977	0.336	0.814
953	ARL13B_KAN512-17_5.tif:0009-0630	0.884	234.735	141	380	58.382	101.663	0.549	207.518	7981	4.124	0.242	0.932	0.211439		0.362328		967	Ac-Tub_KAN512-17_5.tif:0009-0630	0.884	647.853	57	1559	58.382	101.663	0.549	572.736	22027	4.124	0.242	0.932
954	ARL13B_KAN512-17_5.tif:0010-0728	2.054	361.405	118	757	177.145	117.318	0.491	742.371	28551	3.98	0.251	0.832	0.756395		0.645731		968	Ac-Tub_KAN512-17_5.tif:0010-0728	2.054	559.684	0	3244	177.145	117.318	0.491	1149.66	44215	3.98	0.251	0.832
955	ARL13B_KAN512-17_5.tif:0011-0729	0.884	267.353	111	455	122.673	117.58	0.453	236.354	9090	4.805	0.208	0.773	0.240819		0.37685		969	Ac-Tub_KAN512-17_5.tif:0011-0729	0.884	709.441	108	1545	122.673	117.58	0.453	627.184	24121	4.805	0.208	0.773
956	ARL13B_KAN512-17_5.tif:0012-0745	2.47	692.663	194	1416	13.748	120.261	0.53	1710.98	65803	3.443	0.29	0.826	1.7433		0.825727		970	Ac-Tub_KAN512-17_5.tif:0012-0745	2.47	838.853	0	2604	13.748	120.261	0.53	2072.09	79691	3.443	0.29	0.826
957	ARL13B_KAN512-17_5.tif:0013-0891	4.472	1214.8	33	3786	210.426	143.663	0.492	5432.92	208946	4.108	0.243	0.813	5.53556		1.54391		971	Ac-Tub_KAN512-17_5.tif:0013-0891	4.472	786.837	0	2935	210.426	143.663	0.492	3518.95	135336	4.108	0.243	0.813
958	ARL13B_KAN512-17_5.tif:0014-0964	1.716	465.712	192	991	83.699	155.562	0.456	799.21	30737	4.377	0.228	0.81	0.814308		1.49696		972	Ac-Tub_KAN512-17_5.tif:0014-0964	1.716	311.106	5	1030	83.699	155.562	0.456	533.89	20533	4.377	0.228	0.81
973	ARL13B_KAN512-17_6.tif:0001-0007	1.898	432.411	121	922	199.348	1.103	0.366	820.765	31566	5.517	0.181	0.753	0.836271		0.608736		984	Ac-Tub_KAN512-17_6.tif:0001-0007	1.898	710.342	10	1505	199.348	1.103	0.366	1348.31	51855	5.517	0.181	0.753
974	ARL13B_KAN512-17_6.tif:0002-0152	1.612	694.5	205	1600	185.921	24.64	0.717	1119.6	43059	2.191	0.456	0.838	1.14075		1.19975		985	Ac-Tub_KAN512-17_6.tif:0002-0152	1.612	578.871	0	1707	185.921	24.64	0.717	933.196	35890	2.191	0.456	0.838
975	ARL13B_KAN512-17_6.tif:0003-0203	2.444	1011.45	192	2582	127.9	32.756	0.768	2472.12	95076	2.201	0.454	0.9	2.51883		2.07689		986	Ac-Tub_KAN512-17_6.tif:0003-0203	2.444	487	0	1851	127.9	32.756	0.768	1190.3	45778	2.201	0.454	0.9
976	ARL13B_KAN512-17_6.tif:0004-0227	2.184	558.071	160	1391	210.825	36.627	0.621	1218.9	46878	2.911	0.343	0.8	1.24193		0.634868		987	Ac-Tub_KAN512-17_6.tif:0004-0227	2.184	879.036	0	3013	210.825	36.627	0.621	1919.93	73839	2.911	0.343	0.8
977	ARL13B_KAN512-17_6.tif:0005-0415	2.184	446.262	174	1055	129.666	67.034	0.451	974.695	37486	4.511	0.222	0.764	0.993108		0.88221		988	Ac-Tub_KAN512-17_6.tif:0005-0415	2.184	505.845	0	1695	129.666	67.034	0.451	1104.83	42491	4.511	0.222	0.764
978	ARL13B_KAN512-17_6.tif:0006-0511	1.586	277.131	166	480	156.078	82.461	0.661	439.556	16905	1.507	0.664	0.713	0.44786		0.915962		989	Ac-Tub_KAN512-17_6.tif:0006-0511	1.586	302.557	0	772	156.078	82.461	0.661	479.885	18456	1.507	0.664	0.713
979	ARL13B_KAN512-17_6.tif:0007-0586	1.69	529.554	115	1204	10.956	94.499	0.668	895	34421	2.392	0.418	0.818	0.911908		1.16788		990	Ac-Tub_KAN512-17_6.tif:0007-0586	1.69	453.431	19	1391	10.956	94.499	0.668	766.344	29473	2.392	0.418	0.818
980	ARL13B_KAN512-17_6.tif:0008-0766	0.494	284.737	190	450	43.813	123.496	0.745	140.668	5410	2.471	0.405	0.826	0.143326		0.377925		991	Ac-Tub_KAN512-17_6.tif:0008-0766	0.494	753.421	254	1402	43.813	123.496	0.745	372.212	14315	2.471	0.405	0.826
981	ARL13B_KAN512-17_6.tif:0009-0890	1.56	709.1	201	1537	121.394	143.736	0.66	1106.26	42546	2.304	0.434	0.779	1.12716		1.43489		992	Ac-Tub_KAN512-17_6.tif:0009-0890	1.56	494.183	0	1351	121.394	143.736	0.66	770.972	29651	2.304	0.434	0.779
982	ARL13B_KAN512-17_6.tif:0010-0924	2.47	603.811	8	1686	96.35	148.845	0.525	1491.5	57362	1.739	0.575	0.681	1.51968		1.01937		993	Ac-Tub_KAN512-17_6.tif:0010-0924	2.47	592.337	0	1918	96.35	148.845	0.525	1463.16	56272	1.739	0.575	0.681
983	ARL13B_KAN512-17_6.tif:0011-1002	1.43	623.709	221	1134	203.722	161.659	0.499	891.958	34304	3.988	0.251	0.759	0.908808		0.779211		994	Ac-Tub_KAN512-17_6.tif:0011-1002	1.43	800.436	0	2034	203.722	161.659	0.499	1144.69	44024	3.988	0.251	0.759
										42158.1				1.11688		#DIV/0!
																#DIV/0!
																#DIV/0!
																#DIV/0!
995	ARL13B_KAN512-18_1.tif:0001-0210	1.586	312.738	196	440	167.831	33.843	0.618	496.032	19077	2.983	0.335	0.836	0.505403		0.756724		1001	Ac-Tub_KAN512-18_1.tif:0001-0210	1.586	413.279	0	1968	167.831	33.843	0.618	655.499	25210	2.983	0.335	0.836
996	ARL13B_KAN512-18_1.tif:0002-0248	1.976	421.197	194	843	37.539	40.001	0.606	832.336	32011	3.219	0.311	0.822	0.84806		1.54732		1002	Ac-Tub_KAN512-18_1.tif:0002-0248	1.976	272.211	0	1248	37.539	40.001	0.606	537.92	20688	3.219	0.311	0.822
997	ARL13B_KAN512-18_1.tif:0003-0434	1.56	797.45	195	1978	77.58	70.05	0.651	1244.1	47847	2.839	0.352	0.811	1.2676		0.922939		1003	Ac-Tub_KAN512-18_1.tif:0003-0434	1.56	864.033	115	2130	77.58	70.05	0.651	1347.97	51842	2.839	0.352	0.811
998	ARL13B_KAN512-18_1.tif:0004-0690	1.456	852.357	197	1801	95.25	111.32	0.707	1241.11	47732	2.528	0.396	0.882	1.26455		2.02443		1004	Ac-Tub_KAN512-18_1.tif:0004-0690	1.456	421.036	0	2381	95.25	111.32	0.707	613.065	23578	2.528	0.396	0.882
999	ARL13B_KAN512-18_1.tif:0005-0696	0.312	290.667	194	391	217.325	112.257	0.695	90.693	3488	2.523	0.396	0.727	0.0924068		31.7091		1005	Ac-Tub_KAN512-18_1.tif:0005-0696	0.312	9.167	0	59	217.325	112.257	0.695	2.86	110	2.523	0.396	0.727
1000	ARL13B_KAN512-18_1.tif:0006-0950	1.768	338.956	56	757	170.996	153.043	0.423	599.31	23049	3.874	0.258	0.773	0.610632		1.43581		1006	Ac-Tub_KAN512-18_1.tif:0006-0950	1.768	236.074	0	1330	170.996	153.043	0.423	417.403	16053	3.874	0.258	0.773
1007	ARL13B_KAN512-18_2.tif:0001-0194	1.352	248.462	152	398	179.329	31.236	0.43	335.94	12920	5.076	0.197	0.754	0.342287		0.842407		1016	Ac-Tub_KAN512-18_2.tif:0001-0194	1.352	294.942	2	604	179.329	31.236	0.43	398.786	15337	5.076	0.197	0.754
1008	ARL13B_KAN512-18_2.tif:0002-0280	1.976	831.303	192	1896	129.545	45.207	0.5	1642.75	63179	3.976	0.252	0.784	1.67379		2.27336		1017	Ac-Tub_KAN512-18_2.tif:0002-0280	1.976	365.671	0	2037	129.545	45.207	0.5	722.61	27791	3.976	0.252	0.784
1009	ARL13B_KAN512-18_2.tif:0003-0305	1.274	642.653	212	1209	44.948	49.163	0.566	818.789	31490	3.827	0.261	0.817	0.834257		1.60893		1018	Ac-Tub_KAN512-18_2.tif:0003-0305	1.274	399.429	0	2004	44.948	49.163	0.566	508.903	19572	3.827	0.261	0.817
1010	ARL13B_KAN512-18_2.tif:0004-0405	2.132	691.268	33	1742	89.356	65.241	0.567	1473.87	56684	3.25	0.308	0.812	1.50172		1.65815		1019	Ac-Tub_KAN512-18_2.tif:0004-0405	2.132	416.89	0	2059	89.356	65.241	0.567	888.864	34185	3.25	0.308	0.812
1011	ARL13B_KAN512-18_2.tif:0005-0412	2.366	498.187	193	1173	208.577	66.422	0.587	1178.78	45335	3.812	0.262	0.963	1.20105		2.22448		1020	Ac-Tub_KAN512-18_2.tif:0005-0412	2.366	223.956	0	1518	208.577	66.422	0.587	529.912	20380	3.812	0.262	0.963
1012	ARL13B_KAN512-18_2.tif:0006-0474	2.34	518.7	191	1152	23.928	76.535	0.46	1213.83	46683	4.593	0.218	0.763	1.23676		0.693841		1021	Ac-Tub_KAN512-18_2.tif:0006-0474	2.34	747.578	27	2056	23.928	76.535	0.46	1749.44	67282	4.593	0.218	0.763
1013	ARL13B_KAN512-18_2.tif:0007-0525	2.054	275.329	146	425	168.452	84.739	0.677	565.56	21751	1.925	0.52	0.798	0.576244		0.767773		1022	Ac-Tub_KAN512-18_2.tif:0007-0525	2.054	358.608	14	888	168.452	84.739	0.677	736.624	28330	1.925	0.52	0.798
1014	ARL13B_KAN512-18_2.tif:0008-0607	0.832	455.438	213	774	150.713	97.823	0.616	378.947	14574	2.413	0.414	0.753	0.386106		0.692615		1023	Ac-Tub_KAN512-18_2.tif:0008-0607	0.832	657.562	97	1717	150.713	97.823	0.616	547.125	21042	2.413	0.414	0.753
1015	ARL13B_KAN512-18_2.tif:0009-0845	1.664	300.844	191	447	54.452	136.289	0.631	500.634	19254	2.802	0.357	0.815	0.510092		1.04482		1024	Ac-Tub_KAN512-18_2.tif:0009-0845	1.664	287.938	0	989	54.452	136.289	0.631	479.157	18428	2.802	0.357	0.815
1025	ARL13B_KAN512-18_3.tif:0001-0029	1.014	408.436	199	873	20.018	4.844	0.467	414.179	15929	4.2	0.238	0.703	0.422003		0.805675		1040	Ac-Tub_KAN512-18_3.tif:0001-0029	1.014	506.949	0	1262	20.018	4.844	0.467	514.077	19771	4.2	0.238	0.703
1026	ARL13B_KAN512-18_3.tif:0002-0059	0.988	276.632	164	376	85.84	9.599	0.565	273.328	10512	4.273	0.234	0.987	0.278492		0.532577		1041	Ac-Tub_KAN512-18_3.tif:0002-0059	0.988	519.421	6	1466	85.84	9.599	0.565	513.219	19738	4.273	0.234	0.987
1027	ARL13B_KAN512-18_3.tif:0003-0174	1.222	259.128	192	323	144.32	28.145	0.665	316.673	12179	2.779	0.36	0.81	0.322655		0.62588		1042	Ac-Tub_KAN512-18_3.tif:0003-0174	1.222	414.021	0	769	144.32	28.145	0.665	505.964	19459	2.779	0.36	0.81
1028	ARL13B_KAN512-18_3.tif:0004-0416	1.898	899.74	192	2530	42.765	67.061	0.645	1707.81	65681	2.97	0.337	0.825	1.74007		1.39934		1043	Ac-Tub_KAN512-18_3.tif:0004-0416	1.898	642.973	10	3191	42.765	67.061	0.645	1220.43	46937	2.97	0.337	0.825
1029	ARL13B_KAN512-18_3.tif:0005-0446	1.456	608.964	192	1492	92.362	71.972	0.599	886.705	34102	3.03	0.33	0.747	0.903456		0.845134		1044	Ac-Tub_KAN512-18_3.tif:0005-0446	1.456	720.554	0	1653	92.362	71.972	0.599	1049.19	40351	3.03	0.33	0.747
1030	ARL13B_KAN512-18_3.tif:0006-0523	2.262	367.494	173	674	126.936	84.416	0.479	831.322	31972	4.601	0.217	0.825	0.847027		0.524975		1045	Ac-Tub_KAN512-18_3.tif:0006-0523	2.262	700.023	50	1669	126.936	84.416	0.479	1583.55	60902	4.601	0.217	0.825
1031	ARL13B_KAN512-18_3.tif:0007-0582	0.26	256	212	311	89.333	93.928	0.519	66.564	2560	4.539	0.22	0.714	0.0678215		2.48303		1046	Ac-Tub_KAN512-18_3.tif:0007-0582	0.26	103.1	4	288	89.333	93.928	0.519	26.808	1031	4.539	0.22	0.714
1032	ARL13B_KAN512-18_3.tif:0008-0611	1.534	410.898	193	939	207.399	98.487	0.649	630.356	24243	2.805	0.356	0.843	0.642264		3.06447		1047	Ac-Tub_KAN512-18_3.tif:0008-0611	1.534	134.085	0	1104	207.399	98.487	0.649	205.698	7911	2.805	0.356	0.843
1033	ARL13B_KAN512-18_3.tif:0009-0656	1.378	677.887	193	1650	145.504	105.894	0.71	934.184	35928	2.742	0.365	0.835	0.951832		5.7883		1048	Ac-Tub_KAN512-18_3.tif:0009-0656	1.378	117.113	0	1243	145.504	105.894	0.71	161.392	6207	2.742	0.365	0.835
1034	ARL13B_KAN512-18_3.tif:0010-0682	1.404	346.074	196	684	188.376	110.125	0.577	485.917	18688	3.317	0.302	0.766	0.495097		1.2836		1049	Ac-Tub_KAN512-18_3.tif:0010-0682	1.404	269.611	0	1251	188.376	110.125	0.577	378.557	14559	3.317	0.302	0.766
1035	ARL13B_KAN512-18_3.tif:0011-0697	1.196	335.37	137	535	189.483	112.328	0.466	401.126	15427	3.912	0.256	0.713	0.408704		1.12869		1050	Ac-Tub_KAN512-18_3.tif:0011-0697	1.196	297.13	0	1178	189.483	112.328	0.466	355.389	13668	3.912	0.256	0.713
1036	ARL13B_KAN512-18_3.tif:0012-0790	1.846	797.127	196	1930	38.031	127.455	0.687	1471.59	56596	2.753	0.363	0.821	1.49938		1.14243		1051	Ac-Tub_KAN512-18_3.tif:0012-0790	1.846	697.746	0	2950	38.031	127.455	0.687	1288.12	49540	2.753	0.363	0.821
1037	ARL13B_KAN512-18_3.tif:0013-0912	0.988	438.553	193	1043	212.506	147.081	0.629	433.316	16665	2.61	0.383	0.8	0.441502		1.42047		1052	Ac-Tub_KAN512-18_3.tif:0013-0912	0.988	308.737	0	1435	212.506	147.081	0.629	305.05	11732	2.61	0.383	0.8
1038	ARL13B_KAN512-18_3.tif:0014-0950	0.832	366.531	192	608	143.094	153.283	0.567	304.972	11729	3.9	0.256	0.771	0.310734		2.6024		1053	Ac-Tub_KAN512-18_3.tif:0014-0950	0.832	140.844	0	661	143.094	153.283	0.567	117.189	4507	3.9	0.256	0.771
1039	ARL13B_KAN512-18_3.tif:0015-1022	1.742	336.791	130	631	16.444	164.847	0.522	586.725	22565	3.968	0.252	0.882	0.597809		1.07992		1054	Ac-Tub_KAN512-18_3.tif:0015-1022	1.742	311.866	0	1000	16.444	164.847	0.522	543.303	20895	3.968	0.252	0.882
1055	ARL13B_KAN512-18_4.tif:0001-0107	2.288	1329.57	192	3216	150.604	17.378	0.732	3042.24	117002	2.452	0.408	0.871	3.09971		1.40775		1068	Ac-Tub_KAN512-18_4.tif:0001-0107	2.288	944.466	13	3075	150.604	17.378	0.732	2161.07	83113	2.452	0.408	0.871
1056	ARL13B_KAN512-18_4.tif:0002-0169	1.872	481.417	195	960	72.2	27.258	0.666	901.266	34662	2.954	0.339	0.847	0.918292		0.68916		1069	Ac-Tub_KAN512-18_4.tif:0002-0169	1.872	698.556	0	1977	72.2	27.258	0.666	1307.78	50296	2.954	0.339	0.847
1057	ARL13B_KAN512-18_4.tif:0003-0437	1.742	351.896	191	680	7.205	70.458	0.339	613.039	23577	6.718	0.149	0.687	0.62462		0.518233		1070	Ac-Tub_KAN512-18_4.tif:0003-0437	1.742	679.03	0	1723	7.205	70.458	0.339	1182.94	45495	6.718	0.149	0.687
1058	ARL13B_KAN512-18_4.tif:0004-0476	1.768	488.691	192	1245	132.73	76.81	0.598	864.058	33231	3.5	0.286	0.829	0.880381		0.703004		1071	Ac-Tub_KAN512-18_4.tif:0004-0476	1.768	695.147	18	2492	132.73	76.81	0.598	1229.09	47270	3.5	0.286	0.829
1059	ARL13B_KAN512-18_4.tif:0005-0511	2.158	661.94	191	1533	131.748	82.373	0.518	1428.55	54941	3.118	0.321	0.741	1.45554		1.13655		1072	Ac-Tub_KAN512-18_4.tif:0005-0511	2.158	582.41	0	1718	131.748	82.373	0.518	1256.92	48340	3.118	0.321	0.741
1060	ARL13B_KAN512-18_4.tif:0006-0513	1.222	632.915	201	1265	25.702	82.812	0.654	773.469	29747	2.92	0.342	0.79	0.78808		1.80187		1073	Ac-Tub_KAN512-18_4.tif:0006-0513	1.222	351.255	0	1375	25.702	82.812	0.654	429.26	16509	2.92	0.342	0.79
1061	ARL13B_KAN512-18_4.tif:0007-0745	0.442	289.941	192	392	205.741	120.269	0.649	128.162	4929	2.3	0.435	0.756	0.130583		0.487248		1074	Ac-Tub_KAN512-18_4.tif:0007-0745	0.442	595.059	62	1715	205.741	120.269	0.649	263.032	10116	2.3	0.435	0.756
1062	ARL13B_KAN512-18_4.tif:0008-0825	1.56	395.5	189	1060	42.481	133.158	0.322	617.017	23730	6.085	0.164	0.732	0.628673		0.781183		1075	Ac-Tub_KAN512-18_4.tif:0008-0825	1.56	506.283	93	1375	42.481	133.158	0.322	789.85	30377	6.085	0.164	0.732
1063	ARL13B_KAN512-18_4.tif:0009-0873	1.092	474.976	196	808	177.387	140.89	0.594	518.705	19949	3.175	0.315	0.778	0.528504		0.533795		1076	Ac-Tub_KAN512-18_4.tif:0009-0873	1.092	889.81	0	1836	177.387	140.89	0.594	971.731	37372	3.175	0.315	0.778
1064	ARL13B_KAN512-18_4.tif:0010-0884	2.028	454.423	192	905	55.375	142.601	0.677	921.625	35445	2.542	0.393	0.825	0.939036		1.14635		1077	Ac-Tub_KAN512-18_4.tif:0010-0884	2.028	396.41	51	1072	55.375	142.601	0.677	803.968	30920	2.542	0.393	0.825
1065	ARL13B_KAN512-18_4.tif:0011-0944	2.002	319.429	10	694	111.527	152.303	0.468	639.535	24596	3.261	0.307	0.694	0.651616		0.528333		1078	Ac-Tub_KAN512-18_4.tif:0011-0944	2.002	604.597	27	2028	111.527	152.303	0.468	1210.48	46554	3.261	0.307	0.694
1066	ARL13B_KAN512-18_4.tif:0012-0976	1.248	307.292	5	623	108.071	157.548	0.242	383.523	14750	5.609	0.178	0.468	0.390768		0.888501		1079	Ac-Tub_KAN512-18_4.tif:0012-0976	1.248	345.854	0	1143	108.071	157.548	0.242	431.652	16601	5.609	0.178	0.468
1067	ARL13B_KAN512-18_4.tif:0013-0980	2.34	430.5	194	726	24.996	158.038	0.429	1007.43	38745	3.987	0.251	0.726	1.02646		0.765923		1080	Ac-Tub_KAN512-18_4.tif:0013-0980	2.34	562.067	0	2059	24.996	158.038	0.429	1315.32	50586	3.987	0.251	0.726
1081	ARL13B_KAN512-18_5.tif:0001-0040	1.768	317.044	100	616	78.477	6.433	0.748	560.568	21559	2.152	0.465	0.883	0.571158		0.42091		1096	Ac-Tub_KAN512-18_5.tif:0001-0040	1.768	753.235	0	2417	78.477	6.433	0.748	1331.8	51220	2.152	0.465	0.883
1082	ARL13B_KAN512-18_5.tif:0002-0178	1.3	335.6	191	663	101.217	28.751	0.493	436.306	16780	3.915	0.255	0.746	0.444549		1.37982		1097	Ac-Tub_KAN512-18_5.tif:0002-0178	1.3	243.22	18	892	101.217	28.751	0.493	316.205	12161	3.915	0.255	0.746
1083	ARL13B_KAN512-18_5.tif:0003-0183	1.976	274.632	183	497	85.556	29.494	0.411	542.705	20872	4.763	0.21	0.745	0.552957		0.496008		1098	Ac-Tub_KAN512-18_5.tif:0003-0183	1.976	553.684	119	1293	85.556	29.494	0.411	1094.15	42080	4.763	0.21	0.745
1084	ARL13B_KAN512-18_5.tif:0004-0217	2.678	1174.52	46	3738	182.551	35.207	0.657	3145.54	120975	2.524	0.396	0.869	3.20496		3.01		1099	Ac-Tub_KAN512-18_5.tif:0004-0217	2.678	390.204	0	1841	182.551	35.207	0.657	1045.03	40191	2.524	0.396	0.869
1085	ARL13B_KAN512-18_5.tif:0005-0232	1.066	518.854	191	1130	99.906	37.62	0.614	553.131	21273	2.694	0.371	0.766	0.563581		1.63111		1100	Ac-Tub_KAN512-18_5.tif:0005-0232	1.066	318.098	0	2040	99.906	37.62	0.614	339.112	13042	2.694	0.371	0.766
1086	ARL13B_KAN512-18_5.tif:0006-0339	1.404	387.685	209	793	66.405	54.795	0.484	544.343	20935	3.918	0.255	0.706	0.554626		0.542962		1101	Ac-Tub_KAN512-18_5.tif:0006-0339	1.404	714.019	11	1993	66.405	54.795	0.484	1002.54	38557	3.918	0.255	0.706
1087	ARL13B_KAN512-18_5.tif:0007-0500	1.118	566.512	206	1004	4.809	80.604	0.619	633.398	24360	2.993	0.334	0.789	0.645364		0.651372		1102	Ac-Tub_KAN512-18_5.tif:0007-0500	1.118	869.721	41	2061	4.809	80.604	0.619	972.407	37398	2.993	0.334	0.789
1088	ARL13B_KAN512-18_5.tif:0008-0593	1.924	330.622	173	676	156.097	95.656	0.554	636.154	24466	3.727	0.268	0.831	0.648172		0.998775		1103	Ac-Tub_KAN512-18_5.tif:0008-0593	1.924	331.027	0	869	156.097	95.656	0.554	636.934	24496	3.727	0.268	0.831
1089	ARL13B_KAN512-18_5.tif:0009-0680	1.456	467.696	193	741	52.265	109.561	0.472	681.007	26191	4.357	0.229	0.762	0.693872		0.681684		1104	Ac-Tub_KAN512-18_5.tif:0009-0680	1.456	686.089	5	2175	52.265	109.561	0.472	999.006	38421	4.357	0.229	0.762
1090	ARL13B_KAN512-18_5.tif:0010-0754	1.404	349.352	174	630	168.623	121.72	0.344	490.52	18865	6.117	0.163	0.663	0.499786		7.77297		1105	Ac-Tub_KAN512-18_5.tif:0010-0754	1.404	44.944	0	404	168.623	121.72	0.344	63.106	2427	6.117	0.163	0.663
1091	ARL13B_KAN512-18_5.tif:0011-0820	1.638	422.556	14	1154	30.516	132.341	0.408	692.188	26621	4.437	0.225	0.696	0.705264		1.90408		1106	Ac-Tub_KAN512-18_5.tif:0011-0820	1.638	221.921	0	1652	30.516	132.341	0.408	363.528	13981	4.437	0.225	0.696
1092	ARL13B_KAN512-18_5.tif:0012-0869	1.872	608.236	20	1659	197.493	140.252	0.564	1138.69	43793	2.711	0.369	0.738	1.1602		1.25442		1107	Ac-Tub_KAN512-18_5.tif:0012-0869	1.872	484.875	0	2436	197.493	140.252	0.564	907.741	34911	2.711	0.369	0.738
1093	ARL13B_KAN512-18_5.tif:0013-0903	2.054	359.443	190	618	130.06	145.732	0.69	738.34	28396	2.768	0.361	0.823	0.752289		1.2666		1108	Ac-Tub_KAN512-18_5.tif:0013-0903	2.054	283.785	0	1026	130.06	145.732	0.69	582.929	22419	2.768	0.361	0.823
1094	ARL13B_KAN512-18_5.tif:0014-0919	2.314	958.101	194	3616	93.258	148.295	0.773	2217.18	85271	1.563	0.64	0.836	2.25906		1.34268		1109	Ac-Tub_KAN512-18_5.tif:0014-0919	2.314	713.573	10	2742	93.258	148.295	0.773	1651.31	63508	1.563	0.64	0.836
1095	ARL13B_KAN512-18_5.tif:0015-1010	2.314	316.225	2	990	206.539	163.144	0.346	731.788	28144	5.26	0.19	0.664	0.745612		0.399387		1110	Ac-Tub_KAN512-18_5.tif:0015-1010	2.314	791.775	0	2320	206.539	163.144	0.346	1832.28	70468	5.26	0.19	0.664
1111	ARL13B_KAN512-18_6.tif:0001-0059	1.586	770.311	193	2341	27.66	9.483	0.787	1221.79	46989	2.045	0.489	0.847	1.24487		1.82616		1123	Ac-Tub_KAN512-18_6.tif:0001-0059	1.586	421.82	0	1329	27.66	9.483	0.787	669.046	25731	2.045	0.489	0.847
1112	ARL13B_KAN512-18_6.tif:0002-0104	1.924	1117.85	190	3452	135.701	16.803	0.706	2150.88	82721	2.325	0.43	0.846	2.19151		1.33281		1124	Ac-Tub_KAN512-18_6.tif:0002-0104	1.924	838.716	24	2600	135.701	16.803	0.706	1613.79	62065	2.325	0.43	0.846
1113	ARL13B_KAN512-18_6.tif:0003-0148	1.612	1059.29	198	3576	127.489	23.821	0.696	1707.68	65676	2.699	0.37	0.861	1.73994		11.0195		1125	Ac-Tub_KAN512-18_6.tif:0003-0148	1.612	96.129	0	1044	127.489	23.821	0.696	154.969	5960	2.699	0.37	0.861
1114	ARL13B_KAN512-18_6.tif:0004-0149	2.366	554.275	196	1280	131.627	24.036	0.701	1311.49	50439	2.586	0.387	0.919	1.33627		1.70304		1126	Ac-Tub_KAN512-18_6.tif:0004-0149	2.366	325.462	0	895	131.627	24.036	0.701	770.088	29617	2.586	0.387	0.919
1115	ARL13B_KAN512-18_6.tif:0005-0193	3.068	730.102	192	1973	195.345	31.221	0.615	2240.09	86152	2.877	0.348	0.831	2.2824		0.912617		1127	Ac-Tub_KAN512-18_6.tif:0005-0193	3.068	800.008	0	2231	195.345	31.221	0.615	2454.57	94401	2.877	0.348	0.831
1116	ARL13B_KAN512-18_6.tif:0006-0598	2.444	433.309	193	903	100.81	96.525	0.56	1059.07	40731	3.52	0.284	0.814	1.07908		0.530289		1128	Ac-Tub_KAN512-18_6.tif:0006-0598	2.444	817.117	0	2054	100.81	96.525	0.56	1997.15	76809	3.52	0.284	0.814
1117	ARL13B_KAN512-18_6.tif:0007-0769	1.95	542.44	192	1081	119.008	124.097	0.643	1057.82	40683	2.845	0.351	0.824	1.07781		1.13776		1129	Ac-Tub_KAN512-18_6.tif:0007-0769	1.95	476.76	0	2110	119.008	124.097	0.643	929.738	35757	2.845	0.351	0.824
1118	ARL13B_KAN512-18_6.tif:0008-0847	2.002	579.013	32	1961	89.011	136.532	0.354	1159.25	44584	5.065	0.197	0.602	1.18115		1.01045		1130	Ac-Tub_KAN512-18_6.tif:0008-0847	2.002	573.026	17	2711	89.011	136.532	0.354	1147.27	44123	5.065	0.197	0.602
1119	ARL13B_KAN512-18_6.tif:0009-0891	1.768	514.735	191	1228	167.987	143.866	0.5	910.107	35002	4.159	0.24	0.805	0.9273		1.0154		1131	Ac-Tub_KAN512-18_6.tif:0009-0891	1.768	506.926	22	2605	167.987	143.866	0.5	896.3	34471	4.159	0.24	0.805
1120	ARL13B_KAN512-18_6.tif:0010-0909	0.624	229.708	193	289	143.754	146.637	0.584	143.347	5513	2.98	0.336	0.8	0.146055		0.292064		1132	Ac-Tub_KAN512-18_6.tif:0010-0909	0.624	786.5	88	1427	143.754	146.637	0.584	490.806	18876	2.98	0.336	0.8
1121	ARL13B_KAN512-18_6.tif:0011-1007	1.482	404.842	98	767	28.427	162.301	0.424	600.012	23076	3.904	0.256	0.623	0.611347		1.1215		1133	Ac-Tub_KAN512-18_6.tif:0011-1007	1.482	360.982	0	1259	28.427	162.301	0.424	535.008	20576	3.904	0.256	0.623
1122	ARL13B_KAN512-18_6.tif:0012-1035	0.546	1081.1	240	2283	156.286	167.028	0.55	590.314	22703	3.329	0.3	0.857	0.601465		1.34552		1134	Ac-Tub_KAN512-18_6.tif:0012-1035	0.546	803.476	0	2648	156.286	167.028	0.55	438.724	16873	3.329	0.3	0.857
										34113.2				0.903753
										37746.2

## Sheet: IF condition
Exp. number	Cell line	Gene induced	Culture condition, fixation condition	Mouse IgG2a-Alexa488	Rabbit-Alexa568	Mouse IgG2b- Alexa647	Nuclear stain	Date	Replicate
Exp. 1
KAN508-7	NCS1 MEF #6 (WT)	24 hours serum starvation	Fixed in 4% PFA at RT for 15 minutes.	ARL13B, 73-287, NeuroMab, 1:1000	CEP164, 22227-1-AP, Proteintech, 1:1000	Ac-Tub, 6B-11, SIGMA, 1:2000	DAPI	2019-07-19
KAN508-8	NCS1 MEF #7 (WT)	24 hours serum starvation	Fixed in 4% PFA at RT for 15 minutes.	ARL13B, 73-287, NeuroMab, 1:1000	CEP164, 22227-1-AP, Proteintech, 1:1000	Ac-Tub, 6B-11, SIGMA, 1:2000	DAPI	2019-07-19
KAN508-9	NCS1 MEF #10 (KO)	24 hours serum starvation	Fixed in 4% PFA at RT for 15 minutes.	ARL13B, 73-287, NeuroMab, 1:1000	CEP164, 22227-1-AP, Proteintech, 1:1000	Ac-Tub, 6B-11, SIGMA, 1:2000	DAPI	2019-07-19
KAN508-10	NCS1 MEF #12 (WT)	24 hours serum starvation	Fixed in 4% PFA at RT for 15 minutes.	ARL13B, 73-287, NeuroMab, 1:1000	CEP164, 22227-1-AP, Proteintech, 1:1000	Ac-Tub, 6B-11, SIGMA, 1:2000	DAPI	2019-07-19
KAN508-11	NCS1 MEF #13 (KO)	24 hours serum starvation	Fixed in 4% PFA at RT for 15 minutes.	ARL13B, 73-287, NeuroMab, 1:1000	CEP164, 22227-1-AP, Proteintech, 1:1000	Ac-Tub, 6B-11, SIGMA, 1:2000	DAPI	2019-07-19
KAN508-12	NCS1 MEF #16 (KO)	24 hours serum starvation	Fixed in 4% PFA at RT for 15 minutes.	ARL13B, 73-287, NeuroMab, 1:1000	CEP164, 22227-1-AP, Proteintech, 1:1000	Ac-Tub, 6B-11, SIGMA, 1:2000	DAPI	2019-07-19
KAN508-13	NCS1 MEF #6 (WT)	48 hours serum starvation	Fixed in 4% PFA at RT for 15 minutes.	ARL13B, 73-287, NeuroMab, 1:1000	CEP164, 22227-1-AP, Proteintech, 1:1000	Ac-Tub, 6B-11, SIGMA, 1:2000	DAPI	2019-07-19
KAN508-14	NCS1 MEF #7 (WT)	48 hours serum starvation	Fixed in 4% PFA at RT for 15 minutes.	ARL13B, 73-287, NeuroMab, 1:1000	CEP164, 22227-1-AP, Proteintech, 1:1000	Ac-Tub, 6B-11, SIGMA, 1:2000	DAPI	2019-07-19
KAN508-15	NCS1 MEF #10 (KO)	48 hours serum starvation	Fixed in 4% PFA at RT for 15 minutes.	ARL13B, 73-287, NeuroMab, 1:1000	CEP164, 22227-1-AP, Proteintech, 1:1000	Ac-Tub, 6B-11, SIGMA, 1:2000	DAPI	2019-07-19
KAN508-16	NCS1 MEF #12 (WT)	48 hours serum starvation	Fixed in 4% PFA at RT for 15 minutes.	ARL13B, 73-287, NeuroMab, 1:1000	CEP164, 22227-1-AP, Proteintech, 1:1000	Ac-Tub, 6B-11, SIGMA, 1:2000	DAPI	2019-07-19
KAN508-17	NCS1 MEF #13 (KO)	48 hours serum starvation	Fixed in 4% PFA at RT for 15 minutes.	ARL13B, 73-287, NeuroMab, 1:1000	CEP164, 22227-1-AP, Proteintech, 1:1000	Ac-Tub, 6B-11, SIGMA, 1:2000	DAPI	2019-07-19
KAN508-18	NCS1 MEF #16 (KO)	48 hours serum starvation	Fixed in 4% PFA at RT for 15 minutes.	ARL13B, 73-287, NeuroMab, 1:1000	CEP164, 22227-1-AP, Proteintech, 1:1000	Ac-Tub, 6B-11, SIGMA, 1:2000	DAPI	2019-07-19
Exp. 2
KAN512-7	NCS1 MEF #19 (KO)	24 hours serum starvation	Fixed in 4% PFA at RT for 15 minutes.	ARL13B, 73-287, NeuroMab, 1:1000	CEP164, 22227-1-AP, Proteintech, 1:1000	Ac-Tub, 6B-11, SIGMA, 1:2000	DAPI	2019-07-26
KAN512-8	NCS1 MEF #20 (KO)	24 hours serum starvation	Fixed in 4% PFA at RT for 15 minutes.	ARL13B, 73-287, NeuroMab, 1:1000	CEP164, 22227-1-AP, Proteintech, 1:1000	Ac-Tub, 6B-11, SIGMA, 1:2000	DAPI	2019-07-26
KAN512-9	NCS1 MEF #24 (KO)	24 hours serum starvation	Fixed in 4% PFA at RT for 15 minutes.	ARL13B, 73-287, NeuroMab, 1:1000	CEP164, 22227-1-AP, Proteintech, 1:1000	Ac-Tub, 6B-11, SIGMA, 1:2000	DAPI	2019-07-26
KAN512-10	NCS1 MEF #27 (WT)	24 hours serum starvation	Fixed in 4% PFA at RT for 15 minutes.	ARL13B, 73-287, NeuroMab, 1:1000	CEP164, 22227-1-AP, Proteintech, 1:1000	Ac-Tub, 6B-11, SIGMA, 1:2000	DAPI	2019-07-26
KAN512-11	NCS1 MEF #30 (WT)	24 hours serum starvation	Fixed in 4% PFA at RT for 15 minutes.	ARL13B, 73-287, NeuroMab, 1:1000	CEP164, 22227-1-AP, Proteintech, 1:1000	Ac-Tub, 6B-11, SIGMA, 1:2000	DAPI	2019-07-26
KAN512-12	NCS1 MEF #32 (WT)	24 hours serum starvation	Fixed in 4% PFA at RT for 15 minutes.	ARL13B, 73-287, NeuroMab, 1:1000	CEP164, 22227-1-AP, Proteintech, 1:1000	Ac-Tub, 6B-11, SIGMA, 1:2000	DAPI	2019-07-26
KAN512-13	NCS1 MEF #19 (KO)	48 hours serum starvation	Fixed in 4% PFA at RT for 15 minutes.	ARL13B, 73-287, NeuroMab, 1:1000	CEP164, 22227-1-AP, Proteintech, 1:1000	Ac-Tub, 6B-11, SIGMA, 1:2000	DAPI	2019-07-26
KAN512-14	NCS1 MEF #20 (KO)	48 hours serum starvation	Fixed in 4% PFA at RT for 15 minutes.	ARL13B, 73-287, NeuroMab, 1:1000	CEP164, 22227-1-AP, Proteintech, 1:1000	Ac-Tub, 6B-11, SIGMA, 1:2000	DAPI	2019-07-26
KAN512-15	NCS1 MEF #24 (KO)	48 hours serum starvation	Fixed in 4% PFA at RT for 15 minutes.	ARL13B, 73-287, NeuroMab, 1:1000	CEP164, 22227-1-AP, Proteintech, 1:1000	Ac-Tub, 6B-11, SIGMA, 1:2000	DAPI	2019-07-26
KAN512-16	NCS1 MEF #27 (WT)	48 hours serum starvation	Fixed in 4% PFA at RT for 15 minutes.	ARL13B, 73-287, NeuroMab, 1:1000	CEP164, 22227-1-AP, Proteintech, 1:1000	Ac-Tub, 6B-11, SIGMA, 1:2000	DAPI	2019-07-26
KAN512-17	NCS1 MEF #30 (WT)	48 hours serum starvation	Fixed in 4% PFA at RT for 15 minutes.	ARL13B, 73-287, NeuroMab, 1:1000	CEP164, 22227-1-AP, Proteintech, 1:1000	Ac-Tub, 6B-11, SIGMA, 1:2000	DAPI	2019-07-26
KAN512-18	NCS1 MEF #32 (WT)	48 hours serum starvation	Fixed in 4% PFA at RT for 15 minutes.	ARL13B, 73-287, NeuroMab, 1:1000	CEP164, 22227-1-AP, Proteintech, 1:1000	Ac-Tub, 6B-11, SIGMA, 1:2000	DAPI	2019-07-26

## Sheet: Statistics
	WT v.s. KO MEF (24 hours serum starvation)								WT v.s. KO MEF (48 hours serum starvation)
	Table Analyzed	Identify outliers of KAN508_KAN512_24 hours:Cleaned data							Table Analyzed	Identify outliers of KAN508_KAN512_48 hours:Cleaned data
	Column B	NCS1 KO MEF (24 hours)							Column B	NCS1 KO MEF (48 hours)
	vs.	vs.							vs.	vs.
	Column A	WT MEF (24 hours)							Column A	WT MEF (48 hours)
	Nested t test								Nested t test
	P value	0.01							P value	0.0909
	P value summary	**							P value summary	ns
	Significantly different (P < 0.05)?	Yes							Significantly different (P < 0.05)?	No
	One- or two-tailed P value?	Two-tailed							One- or two-tailed P value?	Two-tailed
	t, df	t=2.584, df=626							t, df	t=1.871, df=10
	F, DFn, Dfd	6.677, 1, 626							F, DFn, Dfd	3.499, 1, 10
	How big is the difference?								How big is the difference?
	Mean of column B	0.8383							Mean of column B	0.7973
	Mean of column A	0.9688							Mean of column A	0.9198
	Difference between means (B - A) ± SEM	-0.1305 ± 0.05050							Difference between means (B - A) ± SEM	-0.1225 ± 0.06550
	95% confidence interval	-0.2297 to -0.03132							95% confidence interval	-0.2684 to 0.02342
	Random effects	SD	Variance						Random effects	SD	Variance
	Variation within subcolumns	0.6134	0.3763						Variation within subcolumns	0.5435	0.2954
	Variation among subcolumn means	0	0						Variation among subcolumn means	0.09211	0.008484
	Do the subcolumns differ (within each column)?								Do the subcolumns differ (within each column)?
	Chi-square, df								Chi-square, df	6.789, 1
	P value								P value	0.0092
	P value summary								P value summary	**
	Is there significant difference between subcolumns (P < 0.05)?	No							Is there significant difference between subcolumns (P < 0.05)?	Yes
	Data analyzed								Data analyzed
	Number of treatments (columns)	2							Number of treatments (columns)	2
	Number of subjects (subcolumns)	12							Number of subjects (subcolumns)	12
	Total number of values	628							Total number of values	843
