# Supplementary material for: Myristoylated Neuronal Calcium Sensor-1 captures the preciliary vesicle at distal appendages
Source: eLife. 2025 Jan 30;14:e85998. doi: 10.7554/eLife.85998 (PMC11984960; doi:10.7554/eLife.85998)
Supplement: Figure 7—source data 7. [file elife-85998-fig7-data7.xlsx]

## Sheet: Raw Data
	Ciliated	cell counts	ARL13B+ Ac-Tub- dot		Ciliated	cell counts	ARL13B+ Ac-Tub- dot		Ciliated	cell counts	ARL13B+ Ac-Tub- dot
KAN519-1	7	7		KAN519-2	3	4		KAN519-3	3	4
2	2	4		2	5	6		2	3	3															Ciliated cells (%)
3	5	5		3	4	5		3	3	5												KAN519-1	NCS1 primary neuron #5 (WT)	DIV7	95.122
4	5	5		4	4	5		4	7	7												KAN519-2	NCS1 primary neuron #6 (WT)	DIV7	85.4167
5	5	5		5				5	4	4												KAN519-3	NCS1 primary neuron #10 (KO)	DIV7	92
6	5	5		6	4	4		6	4	4												KAN520-1	NCS1 primary neuron #21 (KO)	DIV7	89.1892
7				7	5	6		7	5	5												KAN520-2	NCS1 primary neuron #22 (WT)	DIV7	86.2069
8	4	4		8	2	3		8	7	8												KAN520-3	NCS1 primary neuron #23 (WT)	DIV7	88.0952
9	3	3		9	3	3		9	4	4												KAN520-4	NCS1 primary neuron #24 (KO)	DIV7	87.7551
11	3	3		10	11	12		11	6	6												KAN520-5	NCS1 primary neuron #26 (KO)	DIV7	85.4839
	39	41	0		41	48	0		46	50	0
		95.122				85.4167				92
																						WT					KO
																						KAN519-1	NCS1 primary neuron #5 (WT)	DIV7	95.122		KAN519-3	NCS1 primary neuron #10 (KO)	DIV7	92
																						KAN519-2	NCS1 primary neuron #6 (WT)	DIV7	85.4167		KAN520-1	NCS1 primary neuron #21 (KO)	DIV7	89.1892
	Ciliated	cell counts	ARL13B+ Ac-Tub- dot		Ciliated	cell counts	ARL13B+ Ac-Tub- dot		Ciliated	cell counts	ARL13B+ Ac-Tub- dot		Ciliated	cell counts	ARL13B+ Ac-Tub- dot		Ciliated	cell counts	ARL13B+ Ac-Tub- dot			KAN520-2	NCS1 primary neuron #22 (WT)	DIV7	86.2069		KAN520-4	NCS1 primary neuron #24 (KO)	DIV7	87.7551
KAN520-1	4	4		KAN520-2	6	7		KAN520-3	2	4		KAN520-4	3	3		KAN520-5	4	4				KAN520-3	NCS1 primary neuron #23 (WT)	DIV7	88.0952		KAN520-5	NCS1 primary neuron #26 (KO)	DIV7	85.4839
2	3	5		2	5	5		2	3	4		2	2	4		2	9	10						Average	88.7102				Average	88.607
3	4	4		3	5	5		3	3	3		3	6	6		3	4	4						S.D.	4.41975					2.72831
4	3	3		4	3	5		4	6	6		4	3	3		4	5	5						S.E.M.	2.20988					1.36416
5	3	4		5	5	6		5	3	3		5	3	4		5	4	4
6	4	4		6	5	6		6	4	4		6	7	7		6	4	5
7				7	7	7		7	4	4		7	3	4		7	7	10
8	4	4		8	4	6		8	5	6		8	2	4		8	4	5
9	3	4		9	7	8		9	2	2		9	8	8		9	6	7
10	5	5		10	3	3		10	5	6		10	6	6		10	6	8
	33	37	0		50	58	0		37	42	0		43	49	0		53	62	0
		89.1892				86.2069				88.0952				87.7551				85.4839

## Sheet: IF condition
Exp. number	Cell line	Gene induced	Culture condition, fixation condition	Rabbit -Alexa488	Mouse IgG1	Mouse IgG2b Alexa647	Nuclear stain	Date	Replicate
KAN519-1	NCS1 primary neuron #5 (WT)	DIV7	Fixed in 4% PFA at RT for 15 minutes.	ADCY3, C-20, sc-588 Santa Cruz, 1:1000	MAP-2, sc-74421, Santa Cruz, 1:1000, IgG1	FGFR1OP,H00011116-M01, 1:250	DAPI	2019-08-13
KAN519-2	NCS1 primary neuron #6 (WT)	DIV7	Fixed in 4% PFA at RT for 15 minutes.	ADCY3, C-20, sc-588 Santa Cruz, 1:1000	MAP-2, sc-74421, Santa Cruz, 1:1000, IgG1	FGFR1OP,H00011116-M01, 1:250	DAPI	2019-08-13
KAN519-3	NCS1 primary neuron #10 (KO)	DIV7	Fixed in 4% PFA at RT for 15 minutes.	ADCY3, C-20, sc-588 Santa Cruz, 1:1000	MAP-2, sc-74421, Santa Cruz, 1:1000, IgG1	FGFR1OP,H00011116-M01, 1:250	DAPI	2019-08-13
KAN520-1	NCS1 primary neuron #21 (KO)	DIV7	Fixed in 4% PFA at RT for 15 minutes.	ADCY3, C-20, sc-588 Santa Cruz, 1:1000	MAP-2, sc-74421, Santa Cruz, 1:1000, IgG1	FGFR1OP,H00011116-M01, 1:1000	DAPI	2019-09-03
KAN520-2	NCS1 primary neuron #22 (WT)	DIV7	Fixed in 4% PFA at RT for 15 minutes.	ADCY3, C-20, sc-588 Santa Cruz, 1:1000	MAP-2, sc-74421, Santa Cruz, 1:1000, IgG1	FGFR1OP,H00011116-M01, 1:1000	DAPI	2019-09-03
KAN520-3	NCS1 primary neuron #23 (WT)	DIV7	Fixed in 4% PFA at RT for 15 minutes.	ADCY3, C-20, sc-588 Santa Cruz, 1:1000	MAP-2, sc-74421, Santa Cruz, 1:1000, IgG1	FGFR1OP,H00011116-M01, 1:1000	DAPI	2019-09-03
KAN520-4	NCS1 primary neuron #24 (KO)	DIV7	Fixed in 4% PFA at RT for 15 minutes.	ADCY3, C-20, sc-588 Santa Cruz, 1:1000	MAP-2, sc-74421, Santa Cruz, 1:1000, IgG1	FGFR1OP,H00011116-M01, 1:1000	DAPI	2019-09-03
KAN520-5	NCS1 primary neuron #26 (KO)	DIV7	Fixed in 4% PFA at RT for 15 minutes.	ADCY3, C-20, sc-588 Santa Cruz, 1:1000	MAP-2, sc-74421, Santa Cruz, 1:1000, IgG1	FGFR1OP,H00011116-M01, 1:1000	DAPI	2019-09-03

## Sheet: Statistics
	Table Analyzed	Data 1
	Column B	Ncs1-/-
	vs.	vs.
	Column A	Ncs1+/+
	Unpaired t test with Welch's correction
	P value	0.9699
	P value summary	ns
	Significantly different (P < 0.05)?	No
	One- or two-tailed P value?	Two-tailed
	Welch-corrected t, df	t=0.03972, df=4.996
	How big is the difference?
	Mean of column A	88.71
	Mean of column B	88.61
	Difference between means (B - A) ± SEM	-0.1031 ± 2.597
	95% confidence interval	-6.780 to 6.574
	R squared (eta squared)	0.0003156
	F test to compare variances
	F, DFn, Dfd	2.624, 3, 3
	P value	0.4491
	P value summary	ns
	Significantly different (P < 0.05)?	No
	Data analyzed
	Sample size, column A	4
	Sample size, column B	4
