# Supplementary material for: Myristoylated Neuronal Calcium Sensor-1 captures the preciliary vesicle at distal appendages
Source: eLife. 2025 Jan 30;14:e85998. doi: 10.7554/eLife.85998 (PMC11984960; doi:10.7554/eLife.85998)
Supplement: Figure 7—source data 8. [file elife-85998-fig7-data8.xlsx]

## Sheet: KAN522_exp.1
	Label	Area	Mean	Min	Max	X	Y	Circ	IntDen	RawIntDen	AR	Round	Solidity
1	SSTR3_KAN522-1_1.tif:0001-0564	2.809	81.407	0	382	74.785	57.736	0.612	228.683	21817	2.702	0.37	0.83	0.945644			3	ADCY3_KAN522-1_1.tif:0001-0564	2.809	443.257	0	1876	74.785	57.736	0.612	1245.17	118793	2.702	0.37	0.83	1.34746
2	SSTR3_KAN522-1_1.tif:0002-0594	2.316	111.719	0	508	68.997	60.839	0.641	258.797	24690	3.001	0.333	0.919	1.07017			4	ADCY3_KAN522-1_1.tif:0002-0594	2.316	513.579	0	1784	68.997	60.839	0.641	1189.7	113501	3.001	0.333	0.919	1.28744
5	SSTR3_KAN522-1_10.tif:0001-0290	2.033	7.66	0	52	33.987	29.809	0.37	15.576	1486	5.633	0.178	0.819	0.0644098			10	ADCY3_KAN522-1_10.tif:0001-0290	2.033	140.835	31	438	33.987	29.809	0.37	286.385	27322	5.633	0.178	0.819	0.309912
6	SSTR3_KAN522-1_10.tif:0002-0570	0.514	4.041	0	19	32.961	58.356	0.759	2.075	198	2.086	0.479	0.899	0.00858219			11	ADCY3_KAN522-1_10.tif:0002-0570	0.514	99.735	31	165	32.961	58.356	0.759	51.225	4887	2.086	0.479	0.899	0.055433
7	SSTR3_KAN522-1_10.tif:0003-0664	2.987	6.344	0	44	85.223	68.04	0.42	18.951	1808	5.035	0.199	0.847	0.0783666			12	ADCY3_KAN522-1_10.tif:0003-0664	2.987	226.656	0	786	85.223	68.04	0.42	677.097	64597	5.035	0.199	0.847	0.732721
8	SSTR3_KAN522-1_10.tif:0004-0761	2.054	4.592	0	29	84.599	77.825	0.283	9.434	900	5.147	0.194	0.573	0.0390099			13	ADCY3_KAN522-1_10.tif:0004-0761	2.054	115.944	19	365	84.599	77.825	0.283	238.2	22725	5.147	0.194	0.573	0.257769
9	SSTR3_KAN522-1_10.tif:0005-0945	1.384	4.273	0	22	28.038	96.825	0.338	5.912	564	5.884	0.17	0.658	0.0244462			14	ADCY3_KAN522-1_10.tif:0005-0945	1.384	113.386	18	267	28.038	96.825	0.338	156.882	14967	5.884	0.17	0.658	0.16977
15	SSTR3_KAN522-1_11.tif:0001-0447	3.522	10.173	0	89	36.111	45.675	0.399	35.827	3418	5.476	0.183	0.815	0.148151			19	ADCY3_KAN522-1_11.tif:0001-0447	3.522	177.613	7	558	36.111	45.675	0.399	625.536	59678	5.476	0.183	0.815	0.676925
16	SSTR3_KAN522-1_11.tif:0002-0470	4.088	3.667	0	32	118.264	48.056	0.344	14.989	1430	6.18	0.162	0.745	0.0619825			20	ADCY3_KAN522-1_11.tif:0002-0470	4.088	247.933	0	1444	118.264	48.056	0.344	1013.53	96694	6.18	0.162	0.745	1.0968
17	SSTR3_KAN522-1_11.tif:0003-0585	2.474	41.949	0	211	21.78	59.98	0.642	103.77	9900	2.699	0.37	0.874	0.429109			21	ADCY3_KAN522-1_11.tif:0003-0585	2.474	371.496	0	1170	21.78	59.98	0.642	918.976	87673	2.699	0.37	0.874	0.994471
18	SSTR3_KAN522-1_11.tif:0004-0684	0.702	2.597	0	11	6.5	70.084	0.653	1.824	174	3.079	0.325	0.95	0.00754192			22	ADCY3_KAN522-1_11.tif:0004-0684	0.702	116.866	36	192	6.5	70.084	0.653	82.073	7830	3.079	0.325	0.95	0.0888154
23	SSTR3_KAN522-1_12.tif:0001-0261	2.809	8.701	0	82	65.813	26.792	0.609	24.444	2332	3.346	0.299	0.944	0.101079			25	ADCY3_KAN522-1_12.tif:0001-0261	2.809	362.078	0	1200	65.813	26.792	0.609	1017.13	97037	3.346	0.299	0.944	1.10069
24	SSTR3_KAN522-1_12.tif:0002-0669	3.69	11.131	0	78	39.004	68.588	0.474	41.068	3918	4.203	0.238	0.836	0.169823			26	ADCY3_KAN522-1_12.tif:0002-0669	3.69	381.051	0	1163	39.004	68.588	0.474	1405.93	134130	4.203	0.238	0.836	1.52143
27	SSTR3_KAN522-1_2_maxP.tif:0001-0345	1.426	4.125	0	30	115.067	35.277	0.676	5.88	561	2.389	0.419	0.822	0.0243162			32	ADCY3_KAN522-1_2_maxP.tif:0001-0345	1.426	141.36	10	432	115.067	35.277	0.676	201.514	19225	2.389	0.419	0.822	0.218068
28	SSTR3_KAN522-1_2_maxP.tif:0002-0382	1.09	2.077	0	18	31.054	39.176	0.7	2.264	216	2.288	0.437	0.852	0.00936239			33	ADCY3_KAN522-1_2_maxP.tif:0002-0382	1.09	164.019	18	468	31.054	39.176	0.7	178.8	17058	2.288	0.437	0.852	0.193488
29	SSTR3_KAN522-1_2_maxP.tif:0003-0400	3.522	19.458	0	77	61.827	41.005	0.531	68.53	6538	3.435	0.291	0.817	0.283386			34	ADCY3_KAN522-1_2_maxP.tif:0003-0400	3.522	227.83	0	767	61.827	41.005	0.531	802.397	76551	3.435	0.291	0.817	0.868315
30	SSTR3_KAN522-1_2_maxP.tif:0004-0500	4.046	226.254	0	948	82.797	51.246	0.516	915.423	87334	3.176	0.315	0.798	3.78544			35	ADCY3_KAN522-1_2_maxP.tif:0004-0500	4.046	344.87	0	1948	82.797	51.246	0.516	1395.35	133120	3.176	0.315	0.798	1.50997
31	SSTR3_KAN522-1_2_maxP.tif:0005-0516	2.264	85.931	0	421	76.472	52.857	0.747	194.554	18561	1.96	0.51	0.908	0.804515			36	ADCY3_KAN522-1_2_maxP.tif:0005-0516	2.264	468.06	0	1861	76.472	52.857	0.747	1059.73	101101	1.96	0.51	0.908	1.14678
37	SSTR3_KAN522-1_3.tif:0001-0430	3.606	53.485	0	492	76.441	44.072	0.37	192.856	18399	6.177	0.162	0.8	0.797493			39	ADCY3_KAN522-1_3.tif:0001-0430	3.606	214.468	0	907	76.441	44.072	0.37	773.32	73777	6.177	0.162	0.8	0.836849
38	SSTR3_KAN522-1_3.tif:0002-0767	5.189	17.465	0	113	70.779	78.292	0.233	90.616	8645	6.546	0.153	0.563	0.374712			40	ADCY3_KAN522-1_3.tif:0002-0767	5.189	169.901	7	687	70.779	78.292	0.233	881.535	84101	6.546	0.153	0.563	0.953954
41	SSTR3_KAN522-1_4.tif:0001-0321	4.968	47.852	0	179	76.881	32.824	0.559	237.75	22682	3.595	0.278	0.874	0.983137			45	ADCY3_KAN522-1_4.tif:0001-0321	4.968	251.679	0	610	76.881	32.824	0.559	1250.44	119296	3.595	0.278	0.874	1.35317
42	SSTR3_KAN522-1_4.tif:0002-0482	1.855	4.113	0	32	69.758	49.353	0.688	7.631	728	2.477	0.404	0.898	0.0315547			46	ADCY3_KAN522-1_4.tif:0002-0482	1.855	430.881	0	1315	69.758	49.353	0.688	799.409	76266	2.477	0.404	0.898	0.865082
43	SSTR3_KAN522-1_4.tif:0003-0522	1.95	3.876	0	31	68.123	53.553	0.682	7.557	721	2.345	0.426	0.84	0.0312513			47	ADCY3_KAN522-1_4.tif:0003-0522	1.95	333.667	0	1214	68.123	53.553	0.682	650.525	62062	2.345	0.426	0.84	0.703967
44	SSTR3_KAN522-1_4.tif:0004-0780	2.505	17.318	0	101	63.912	79.928	0.611	43.384	4139	2.973	0.336	0.828	0.179402			48	ADCY3_KAN522-1_4.tif:0004-0780	2.505	307.895	0	1110	63.912	79.928	0.611	771.329	73587	2.973	0.336	0.828	0.834694
49	SSTR3_KAN522-1_5.tif:0001-0130	3.532	36.151	0	213	64.687	13.274	0.592	127.7	12183	3.005	0.333	0.83	0.528065			53	ADCY3_KAN522-1_5.tif:0001-0130	3.532	486.43	0	1968	64.687	13.274	0.592	1718.26	163927	3.005	0.333	0.83	1.85942
50	SSTR3_KAN522-1_5.tif:0002-0464	4.193	63.828	0	350	86.95	47.507	0.47	267.612	25531	1.927	0.519	0.714	1.10663			54	ADCY3_KAN522-1_5.tif:0002-0464	4.193	289.065	0	1239	86.95	47.507	0.47	1211.97	115626	1.927	0.519	0.714	1.31154
51	SSTR3_KAN522-1_5.tif:0003-0546	3.438	157.924	0	594	56.997	55.786	0.381	542.95	51799	6.016	0.166	0.855	2.2452			55	ADCY3_KAN522-1_5.tif:0003-0546	3.438	176.796	0	463	56.997	55.786	0.381	607.833	57989	6.016	0.166	0.855	0.657767
52	SSTR3_KAN522-1_5.tif:0004-0588	2.914	67.054	0	386	82.369	60.181	0.746	195.392	18641	1.584	0.631	0.842	0.807983			56	ADCY3_KAN522-1_5.tif:0004-0588	2.914	405.288	0	1681	82.369	60.181	0.746	1180.99	112670	1.584	0.631	0.842	1.27801
57	SSTR3_KAN522-1_6.tif:0001-0219	5.597	113.511	0	861	46.507	22.177	0.281	635.358	60615	6.216	0.161	0.646	2.62732			61	ADCY3_KAN522-1_6.tif:0001-0219	5.597	306.88	0	1333	46.507	22.177	0.281	1717.7	163874	6.216	0.161	0.646	1.85882
58	SSTR3_KAN522-1_6.tif:0002-0256	2.243	123.463	0	663	48.827	26.205	0.661	276.941	26421	2.877	0.348	0.918	1.1452			62	ADCY3_KAN522-1_6.tif:0002-0256	2.243	378.636	0	1248	48.827	26.205	0.661	849.324	81028	2.877	0.348	0.918	0.919097
59	SSTR3_KAN522-1_6.tif:0003-0380	4.339	55.058	0	295	42.337	38.883	0.359	238.923	22794	6.243	0.16	0.82	0.987992			63	ADCY3_KAN522-1_6.tif:0003-0380	4.339	340.326	0	1213	42.337	38.883	0.359	1476.84	140895	6.243	0.16	0.82	1.59817
60	SSTR3_KAN522-1_6.tif:0004-0666	3.826	111.375	0	447	118.29	68.145	0.4	426.109	40652	5.611	0.178	0.83	1.76204			64	ADCY3_KAN522-1_6.tif:0004-0666	3.826	377.816	0	1418	118.29	68.145	0.4	1445.48	137903	5.611	0.178	0.83	1.56423
65	SSTR3_KAN522-1_7.tif:0001-0457	3.323	40.369	0	199	63.69	46.931	0.536	134.136	12797	3.246	0.308	0.787	0.554678			69	ADCY3_KAN522-1_7.tif:0001-0457	3.323	298.502	0	1008	63.69	46.931	0.536	991.846	94625	3.246	0.308	0.787	1.07333
66	SSTR3_KAN522-1_7.tif:0002-0468	1.488	3.324	0	19	93.457	47.858	0.627	4.947	472	2.764	0.362	0.805	0.0204585			70	ADCY3_KAN522-1_7.tif:0002-0468	1.488	153.338	0	427	93.457	47.858	0.627	228.232	21774	2.764	0.362	0.805	0.246982
67	SSTR3_KAN522-1_7.tif:0003-0634	3.417	167.163	0	654	88.87	64.917	0.553	571.209	54495	3.291	0.304	0.849	2.36205			71	ADCY3_KAN522-1_7.tif:0003-0634	3.417	504.785	0	1838	88.87	64.917	0.553	1724.89	164560	3.291	0.304	0.849	1.8666
68	SSTR3_KAN522-1_7.tif:0004-0825	4.098	139.624	0	395	34.981	84.643	0.456	572.236	54593	4.108	0.243	0.793	2.3663			72	ADCY3_KAN522-1_7.tif:0004-0825	4.098	265.555	0	888	34.981	84.643	0.456	1088.35	103832	4.108	0.243	0.793	1.17776
73	SSTR3_KAN522-1_8.tif:0001-0295	2.987	12.267	0	72	69.589	30.384	0.511	36.645	3496	3.372	0.297	0.766	0.151532			75	ADCY3_KAN522-1_8.tif:0001-0295	2.987	288.832	0	1210	69.589	30.384	0.511	862.835	82317	3.372	0.297	0.766	0.933718
74	SSTR3_KAN522-1_8.tif:0002-0518	5.136	36.527	0	159	36.771	53.235	0.261	187.604	17898	6.19	0.162	0.633	0.775778			76	ADCY3_KAN522-1_8.tif:0002-0518	5.136	227.096	0	1385	36.771	53.235	0.261	1166.39	111277	6.19	0.162	0.633	1.26221
77	SSTR3_KAN522-1_9.tif:0001-0444	2.516	182.471	0	856	47.935	45.391	0.672	459.032	43793	2.356	0.424	0.857	1.89818			79	ADCY3_KAN522-1_9.tif:0001-0444	2.516	393.587	0	1403	47.935	45.391	0.672	990.127	94461	2.356	0.424	0.857	1.07147
78	SSTR3_KAN522-1_9.tif:0002-0506	2.704	43.876	0	278	29.781	51.873	0.518	118.655	11320	3.729	0.268	0.869	0.490658			80	ADCY3_KAN522-1_9.tif:0002-0506	2.704	415.659	0	2087	29.781	51.873	0.518	1124.08	107240	3.729	0.268	0.869	1.21642
										17466.5				0.757074													85999.4				0.975488
81	SSTR3_KAN522-2_1.tif:0001-0376	2.432	34.306	0	145	121.354	38.486	0.506	83.425	7959	3.905	0.256	0.851	0.344978			85	ADCY3_KAN522-2_1.tif:0001-0376	2.432	176.254	0	500	121.354	38.486	0.506	428.614	40891	3.905	0.256	0.851	0.463825
82	SSTR3_KAN522-2_1.tif:0002-0400	4.298	3.241	0	21	71.427	40.95	0.38	13.93	1329	6.054	0.165	0.818	0.0576047			86	ADCY3_KAN522-2_1.tif:0002-0400	4.298	264.783	0	912	71.427	40.95	0.38	1137.92	108561	6.054	0.165	0.818	1.2314
83	SSTR3_KAN522-2_1.tif:0003-0409	3.721	7.594	0	112	83.251	41.83	0.351	28.259	2696	4.608	0.217	0.688	0.116856			87	ADCY3_KAN522-2_1.tif:0003-0409	3.721	218.634	0	872	83.251	41.83	0.351	813.549	77615	4.608	0.217	0.688	0.880384
84	SSTR3_KAN522-2_1.tif:0004-0810	3.249	6.194	0	55	86.8	83.064	0.381	20.125	1920	4.988	0.2	0.696	0.0832212			88	ADCY3_KAN522-2_1.tif:0004-0810	3.249	209.648	0	938	86.8	83.064	0.381	681.227	64991	4.988	0.2	0.696	0.73719
89	SSTR3_KAN522-2_10.tif:0001-0216	5.377	27.858	0	114	58.326	22.141	0.505	149.796	14291	3.957	0.253	0.858	0.619435			93	ADCY3_KAN522-2_10.tif:0001-0216	5.377	346.6	0	1438	58.326	22.141	0.505	1863.74	177806	3.957	0.253	0.858	2.01685
90	SSTR3_KAN522-2_10.tif:0002-0438	1.824	34.253	0	147	40.693	44.823	0.739	62.472	5960	2.426	0.412	0.956	0.258333			94	ADCY3_KAN522-2_10.tif:0002-0438	1.824	254.672	0	722	40.693	44.823	0.739	464.483	44313	2.426	0.412	0.956	0.50264
91	SSTR3_KAN522-2_10.tif:0003-0735	3.564	8.688	0	85	78.402	75.305	0.357	30.963	2954	6.227	0.161	0.796	0.128039			95	ADCY3_KAN522-2_10.tif:0003-0735	3.564	262.453	0	1004	78.402	75.305	0.357	935.338	89234	6.227	0.161	0.796	1.01218
92	SSTR3_KAN522-2_10.tif:0004-0907	2.138	30.456	0	128	52.637	92.873	0.642	65.124	6213	2.92	0.342	0.907	0.269299			96	ADCY3_KAN522-2_10.tif:0004-0907	2.138	287.162	0	879	52.637	92.873	0.642	614.038	58581	2.92	0.342	0.907	0.664482
97	SSTR3_KAN522-2_11.tif:0001-0357	2.872	4.646	0	37	50.1	36.522	0.579	13.343	1273	3.133	0.319	0.855	0.0551774			99	ADCY3_KAN522-2_11.tif:0001-0357	2.872	349.686	0	1285	50.1	36.522	0.579	1004.31	95814	3.133	0.319	0.855	1.08681
98	SSTR3_KAN522-2_11.tif:0002-0505	2.788	3.85	0	23	66.251	51.894	0.529	10.733	1024	3.408	0.293	0.804	0.0443846			100	ADCY3_KAN522-2_11.tif:0002-0505	2.788	287.466	0	937	66.251	51.894	0.529	801.506	76466	3.408	0.293	0.804	0.867351
101	SSTR3_KAN522-2_12.tif:0001-0185	2.872	8.766	0	136	22.497	18.958	0.457	25.177	2402	4.468	0.224	0.823	0.104113			104	ADCY3_KAN522-2_12.tif:0001-0185	2.872	310.65	2	1120	22.497	18.958	0.457	892.195	85118	4.468	0.224	0.823	0.96549
102	SSTR3_KAN522-2_12.tif:0002-0550	0.178	3.765	0	17	0.443	56.415	0.733	0.671	64	2.35	0.426	0.919	0.00277404			105	ADCY3_KAN522-2_12.tif:0002-0550	0.178	124.294	0	375	0.443	56.415	0.733	22.148	2113	2.35	0.426	0.919	0.0239677
103	SSTR3_KAN522-2_12.tif:0003-0950	2.337	66.197	0	254	93.168	97.307	0.643	154.733	14762	2.702	0.37	0.894	0.63985			106	ADCY3_KAN522-2_12.tif:0003-0950	2.337	354.475	0	1071	93.168	97.307	0.643	828.57	79048	2.702	0.37	0.894	0.896638
107	SSTR3_KAN522-2_13.tif:0001-0197	3.428	6.177	0	38	82.214	20.223	0.386	21.173	2020	5.721	0.175	0.815	0.0875557			115	ADCY3_KAN522-2_13.tif:0001-0197	3.428	277.092	0	974	82.214	20.223	0.386	949.751	90609	5.721	0.175	0.815	1.02777
108	SSTR3_KAN522-2_13.tif:0002-0351	3.05	7.199	0	94	68.968	35.77	0.45	21.959	2095	2.652	0.377	0.683	0.0908065			116	ADCY3_KAN522-2_13.tif:0002-0351	3.05	266.667	0	957	68.968	35.77	0.45	813.392	77600	2.652	0.377	0.683	0.880214
109	SSTR3_KAN522-2_13.tif:0003-0399	2.107	3.607	0	19	70.398	40.782	0.558	7.599	725	3.414	0.293	0.822	0.0314247			117	ADCY3_KAN522-2_13.tif:0003-0399	2.107	196.632	10	709	70.398	40.782	0.558	414.275	39523	3.414	0.293	0.822	0.448308
110	SSTR3_KAN522-2_13.tif:0004-0479	2.023	5.098	0	38	76.884	49.083	0.673	10.314	984	2.498	0.4	0.891	0.0426509			118	ADCY3_KAN522-2_13.tif:0004-0479	2.023	200.508	5	452	76.884	49.083	0.673	405.627	38698	2.498	0.4	0.891	0.43895
111	SSTR3_KAN522-2_13.tif:0005-0514	1.593	16.132	0	75	28.143	52.644	0.701	25.702	2452	2.77	0.361	0.884	0.10628			119	ADCY3_KAN522-2_13.tif:0005-0514	1.593	209.316	0	567	28.143	52.644	0.701	333.491	31816	2.77	0.361	0.884	0.360888
112	SSTR3_KAN522-2_13.tif:0006-0571	2.18	3.466	0	17	57.02	58.397	0.576	7.557	721	2.285	0.438	0.762	0.0312513			120	ADCY3_KAN522-2_13.tif:0006-0571	2.18	260.01	2	745	57.02	58.397	0.576	566.88	54082	2.285	0.438	0.762	0.61345
113	SSTR3_KAN522-2_13.tif:0007-0600	2.694	6.864	0	41	69.117	61.502	0.673	18.49	1764	2.714	0.368	0.882	0.0764595			121	ADCY3_KAN522-2_13.tif:0007-0600	2.694	314.062	0	1052	69.117	61.502	0.673	846.033	80714	2.714	0.368	0.882	0.915535
114	SSTR3_KAN522-2_13.tif:0008-0706	0.807	3.494	0	17	72.216	72.359	0.695	2.82	269	2.583	0.387	0.945	0.0116596			122	ADCY3_KAN522-2_13.tif:0008-0706	0.807	108.182	29	215	72.216	72.359	0.695	87.314	8330	2.583	0.387	0.945	0.0944868
123	SSTR3_KAN522-2_2.tif:0001-0353	2.746	8.714	0	50	94.375	36.228	0.529	23.93	2283	3.598	0.278	0.79	0.0989552			126	ADCY3_KAN522-2_2.tif:0001-0353	2.746	328.748	0	1190	94.375	36.228	0.529	902.823	86132	3.598	0.278	0.79	0.976992
124	SSTR3_KAN522-2_2.tif:0002-0413	2.579	19.065	0	84	81.233	42.464	0.578	49.16	4690	2.411	0.415	0.78	0.203285			127	ADCY3_KAN522-2_2.tif:0002-0413	2.579	283.61	0	1271	81.233	42.464	0.578	731.298	69768	2.411	0.415	0.78	0.791375
125	SSTR3_KAN522-2_2.tif:0003-0541	2.61	6.06	0	40	104.741	55.36	0.531	15.817	1509	3.476	0.288	0.823	0.0654067			128	ADCY3_KAN522-2_2.tif:0003-0541	2.61	283.406	0	913	104.741	55.36	0.531	739.684	70568	3.476	0.288	0.823	0.80045
129	SSTR3_KAN522-2_3.tif:0001-0402	3.637	8.807	0	68	77.537	41.148	0.441	32.033	3056	5.039	0.198	0.853	0.13246			131	ADCY3_KAN522-2_3.tif:0001-0402	3.637	235.043	0	811	77.537	41.148	0.441	854.9	81560	5.039	0.198	0.853	0.925132
130	SSTR3_KAN522-2_3.tif:0002-0658	3.868	3.892	0	28	90.943	67.436	0.409	15.052	1436	4.528	0.221	0.758	0.0622425			132	ADCY3_KAN522-2_3.tif:0002-0658	3.868	343.997	0	1016	90.943	67.436	0.409	1330.52	126935	4.528	0.221	0.758	1.43982
133	SSTR3_KAN522-2_4.tif:0001-0477	3.008	121.261	0	668	21.026	48.762	0.534	364.79	34802	2.944	0.34	0.782	1.50847			135	ADCY3_KAN522-2_4.tif:0001-0477	3.008	367.498	0	1239	21.026	48.762	0.534	1105.54	105472	2.944	0.34	0.782	1.19636
134	SSTR3_KAN522-2_4.tif:0002-0641	4.277	5.049	0	26	135.156	65.366	0.35	21.593	2060	4.383	0.228	0.679	0.0892894			136	ADCY3_KAN522-2_4.tif:0002-0641	4.277	225.039	0	837	135.156	65.366	0.35	962.402	91816	4.383	0.228	0.679	1.04146
137	SSTR3_KAN522-2_5.tif:0001-0301	2.6	12.605	0	60	71.887	30.953	0.566	32.766	3126	2.452	0.408	0.791	0.135495			142	ADCY3_KAN522-2_5.tif:0001-0301	2.6	317.468	0	919	71.887	30.953	0.566	825.258	78732	2.452	0.408	0.791	0.893054
138	SSTR3_KAN522-2_5.tif:0002-0308	3.134	117.843	0	592	95.725	31.677	0.609	369.328	35235	1.93	0.518	0.799	1.52724			143	ADCY3_KAN522-2_5.tif:0002-0308	3.134	478.01	0	1585	95.725	31.677	0.609	1498.12	142925	1.93	0.518	0.799	1.62119
139	SSTR3_KAN522-2_5.tif:0003-0371	2.044	2.99	0	19	51.192	37.966	0.586	6.111	583	3.514	0.285	0.85	0.0252698			144	ADCY3_KAN522-2_5.tif:0003-0371	2.044	200.036	12	531	51.192	37.966	0.586	408.866	39007	3.514	0.285	0.85	0.442455
140	SSTR3_KAN522-2_5.tif:0004-0414	2.746	38.653	0	158	113.454	42.346	0.656	106.15	10127	2.848	0.351	0.91	0.438949			145	ADCY3_KAN522-2_5.tif:0004-0414	2.746	447.263	0	1394	113.454	42.346	0.656	1228.3	117183	2.848	0.351	0.91	1.3292
141	SSTR3_KAN522-2_5.tif:0005-0433	2.138	5.353	0	40	81.097	44.369	0.711	11.446	1092	2.392	0.418	0.899	0.0473321			146	ADCY3_KAN522-2_5.tif:0005-0433	2.138	182.211	0	458	81.097	44.369	0.711	389.621	37171	2.392	0.418	0.899	0.421629
147	SSTR3_KAN522-2_6.tif:0001-0562	3.312	92.981	0	430	85.314	57.557	0.564	307.978	29382	3.352	0.298	0.874	1.27354			149	ADCY3_KAN522-2_6.tif:0001-0562	3.312	257.165	0	1069	85.314	57.557	0.564	851.798	81264	3.352	0.298	0.874	0.921774
148	SSTR3_KAN522-2_6.tif:0002-0642	2.694	186.498	0	973	92.166	65.717	0.743	502.396	47930	1.978	0.506	0.892	2.0775			150	ADCY3_KAN522-2_6.tif:0002-0642	2.694	487.152	0	2119	92.166	65.717	0.743	1312.31	125198	1.978	0.506	0.892	1.42012
151	SSTR3_KAN522-2_7.tif:0001-0293	2.862	61.037	0	385	70.01	30.077	0.581	174.659	16663	3.175	0.315	0.86	0.722247			153	ADCY3_KAN522-2_7.tif:0001-0293	2.862	353.374	0	1422	70.01	30.077	0.581	1011.2	96471	3.175	0.315	0.86	1.09427
152	SSTR3_KAN522-2_7.tif:0002-0551	2.82	4.175	0	41	46.104	56.481	0.44	11.771	1123	4.875	0.205	0.792	0.0486757			154	ADCY3_KAN522-2_7.tif:0002-0551	2.82	180.238	20	493	46.104	56.481	0.44	508.202	48484	4.875	0.205	0.792	0.549952
155	SSTR3_KAN522-2_8.tif:0001-0168	4.015	42.136	0	204	48.276	17.068	0.744	169.156	16138	1.826	0.548	0.907	0.699492			158	ADCY3_KAN522-2_8.tif:0001-0168	4.015	364.439	0	1105	48.276	17.068	0.744	1463.06	139580	1.826	0.548	0.907	1.58325
156	SSTR3_KAN522-2_8.tif:0002-0708	1.667	21.73	0	126	139.283	72.585	0.738	36.215	3455	2.088	0.479	0.888	0.149755			159	ADCY3_KAN522-2_8.tif:0002-0708	1.667	210.755	0	955	139.283	72.585	0.738	351.247	33510	2.088	0.479	0.888	0.380103
157	SSTR3_KAN522-2_8.tif:0003-0756	2.83	13.73	0	98	87.473	77.463	0.379	38.856	3707	6.115	0.164	0.833	0.160678			160	ADCY3_KAN522-2_8.tif:0003-0756	2.83	221.374	0	778	87.473	77.463	0.379	626.511	59771	6.115	0.164	0.833	0.67798
161	SSTR3_KAN522-2_9.tif:0001-0203	2.694	5.7	0	42	113.828	20.832	0.499	15.356	1465	4.022	0.249	0.832	0.0634995			164	ADCY3_KAN522-2_9.tif:0001-0203	2.694	316.914	0	1091	113.828	20.832	0.499	853.716	81447	4.022	0.249	0.832	0.92385
162	SSTR3_KAN522-2_9.tif:0002-0343	1.981	6.444	0	56	78.518	35.043	0.416	12.767	1218	4.307	0.232	0.726	0.0527935			165	ADCY3_KAN522-2_9.tif:0002-0343	1.981	156.884	3	461	78.518	35.043	0.416	310.798	29651	4.307	0.232	0.726	0.33633
163	SSTR3_KAN522-2_9.tif:0003-0440	2.83	6.352	0	54	24.666	45.099	0.478	17.976	1715	4.655	0.215	0.837	0.0743356			166	ADCY3_KAN522-2_9.tif:0003-0440	2.83	236.341	2	756	24.666	45.099	0.478	668.868	63812	4.655	0.215	0.837	0.723817
										6899.35				0.299048													75078.6				0.851613
167	SSTR3_KAN522-3_1.tif:0001-0462	2.893	8.014	0	41	49.101	47.171	0.518	23.186	2212	3.355	0.298	0.801	0.0958778			171	ADCY3_KAN522-3_1.tif:0001-0462	2.893	198.004	21	492	49.101	47.171	0.518	572.823	54649	3.355	0.298	0.801	0.619881
168	SSTR3_KAN522-3_1.tif:0002-0554	3.166	47.44	0	217	57.31	56.622	0.466	150.174	14327	4.219	0.237	0.775	0.620995			172	ADCY3_KAN522-3_1.tif:0002-0554	3.166	251.503	0	751	57.31	56.622	0.466	796.139	75954	4.219	0.237	0.775	0.861543
169	SSTR3_KAN522-3_1.tif:0003-0704	3.312	3.813	0	36	61.693	72.197	0.261	12.631	1205	6.783	0.147	0.636	0.05223			173	ADCY3_KAN522-3_1.tif:0003-0704	3.312	151.38	4	533	61.693	72.197	0.261	501.41	47836	6.783	0.147	0.636	0.542602
170	SSTR3_KAN522-3_1.tif:0004-0782	2.254	355.14	0	1393	75.809	80.023	0.729	800.342	76355	2.126	0.47	0.879	3.30956			174	ADCY3_KAN522-3_1.tif:0004-0782	2.254	297.07	0	972	75.809	80.023	0.729	669.476	63870	2.126	0.47	0.879	0.724475
175	SSTR3_KAN522-3_10.tif:0001-0217	2.222	7.83	0	53	73.868	22.155	0.533	17.4	1660	3.409	0.293	0.787	0.0719517			178	ADCY3_KAN522-3_10.tif:0001-0217	2.222	183.915	17	475	73.868	22.155	0.533	408.688	38990	3.409	0.293	0.787	0.442262
176	SSTR3_KAN522-3_10.tif:0002-0448	3.249	61.89	0	309	33.992	45.947	0.669	201.105	19186	2.663	0.376	0.905	0.831605			179	ADCY3_KAN522-3_10.tif:0002-0448	3.249	438.939	0	1472	33.992	45.947	0.669	1426.28	136071	2.663	0.376	0.905	1.54345
177	SSTR3_KAN522-3_10.tif:0003-0874	3.396	39.87	0	217	61.189	89.543	0.427	135.405	12918	3.575	0.28	0.716	0.559923			180	ADCY3_KAN522-3_10.tif:0003-0874	3.396	285.769	0	1351	61.189	89.543	0.427	970.505	92589	3.575	0.28	0.716	1.05023
181	SSTR3_KAN522-3_11.tif:0001-0456	2.736	4.709	0	43	33.681	46.564	0.44	12.882	1229	4.03	0.248	0.73	0.0532702			183	ADCY3_KAN522-3_11.tif:0001-0456	2.736	207.793	7	587	33.681	46.564	0.44	568.473	54234	4.03	0.248	0.73	0.615174
182	SSTR3_KAN522-3_11.tif:0002-0490	2.893	210.862	0	918	121.317	50.273	0.556	610.023	58198	3.414	0.293	0.831	2.52256			184	ADCY3_KAN522-3_11.tif:0002-0490	2.893	363.989	0	1196	121.317	50.273	0.556	1053.02	100461	3.414	0.293	0.831	1.13952
185	SSTR3_KAN522-3_12.tif:0001-0444	2.316	36.647	0	143	99.745	45.441	0.718	84.893	8099	1.82	0.549	0.837	0.351046			187	ADCY3_KAN522-3_12.tif:0001-0444	2.316	411.765	0	1308	99.745	45.441	0.718	953.849	91000	1.82	0.549	0.837	1.03221
186	SSTR3_KAN522-3_12.tif:0002-0506	2.893	147.775	0	554	61.451	51.922	0.497	427.513	40786	4.016	0.249	0.843	1.76784			188	ADCY3_KAN522-3_12.tif:0002-0506	2.893	316.92	0	946	61.451	51.922	0.497	916.848	87470	4.016	0.249	0.843	0.992169
189	SSTR3_KAN522-3_2.tif:0001-0503	2.096	77.27	0	326	51.734	51.491	0.602	161.987	15454	3.367	0.297	0.893	0.669844			192	ADCY3_KAN522-3_2.tif:0001-0503	2.096	271.66	0	811	51.734	51.491	0.602	569.5	54332	3.367	0.297	0.893	0.616286
190	SSTR3_KAN522-3_2.tif:0002-0660	3.92	130.914	0	622	55.622	67.885	0.41	513.213	48962	2.474	0.404	0.696	2.12223			193	ADCY3_KAN522-3_2.tif:0002-0660	3.92	310.631	0	1553	55.622	67.885	0.41	1217.74	116176	2.474	0.404	0.696	1.31778
191	SSTR3_KAN522-3_2.tif:0003-0829	4.434	10.168	0	92	75.235	85.087	0.313	45.082	4301	3.362	0.297	0.583	0.186424			194	ADCY3_KAN522-3_2.tif:0003-0829	4.434	197.272	0	1318	75.235	85.087	0.313	874.669	83446	3.362	0.297	0.583	0.946524
195	SSTR3_KAN522-3_3.tif:0001-0765	4.35	80.494	0	365	70.18	78.201	0.247	350.147	33405	9.005	0.111	0.744	1.44792			197	ADCY3_KAN522-3_3.tif:0001-0765	4.35	167.149	18	571	70.18	78.201	0.247	727.095	69367	9.005	0.111	0.744	0.786827
196	SSTR3_KAN522-3_3.tif:0002-0935	2.903	24.639	0	168	72.934	95.773	0.323	71.539	6825	6.052	0.165	0.711	0.295825			198	ADCY3_KAN522-3_3.tif:0002-0935	2.903	151.357	2	506	72.934	95.773	0.323	439.462	41926	6.052	0.165	0.711	0.475565
199	SSTR3_KAN522-3_4.tif:0001-0634	2.358	74.178	0	378	59.658	65.009	0.731	174.942	16690	2.155	0.464	0.874	0.723418			201	ADCY3_KAN522-3_4.tif:0001-0634	2.358	345.249	0	1121	59.658	65.009	0.731	814.241	77681	2.155	0.464	0.874	0.881132
200	SSTR3_KAN522-3_4.tif:0002-0677	2.033	5.34	0	42	77.175	69.292	0.549	10.859	1036	3.575	0.28	0.87	0.0449048			202	ADCY3_KAN522-3_4.tif:0002-0677	2.033	223.17	4	788	77.175	69.292	0.549	453.812	43295	3.575	0.28	0.87	0.491093
203	SSTR3_KAN522-3_5.tif:0001-0317	3.113	8.623	0	91	124.239	32.536	0.369	26.844	2561	6.533	0.153	0.83	0.111005			205	ADCY3_KAN522-3_5.tif:0001-0317	3.113	166.485	13	479	124.239	32.536	0.369	518.286	49446	6.533	0.153	0.83	0.560864
204	SSTR3_KAN522-3_5.tif:0002-0389	2.4	157.249	0	562	45.247	39.851	0.59	377.452	36010	3.132	0.319	0.845	1.56083			206	ADCY3_KAN522-3_5.tif:0002-0389	2.4	256.969	0	980	45.247	39.851	0.59	616.815	58846	3.132	0.319	0.845	0.667488
207	SSTR3_KAN522-3_6.tif:0001-0304	4.675	155.22	0	807	89.107	31.095	0.347	725.638	69228	5.926	0.169	0.746	3.00064			211	ADCY3_KAN522-3_6.tif:0001-0304	4.675	289.034	0	813	89.107	31.095	0.347	1351.21	128909	5.926	0.169	0.746	1.46221
208	SSTR3_KAN522-3_6.tif:0002-0854	2.704	64.907	0	296	37.806	87.465	0.502	175.529	16746	3.921	0.255	0.793	0.725845			212	ADCY3_KAN522-3_6.tif:0002-0854	2.704	228.019	0	908	37.806	87.465	0.502	616.637	58829	3.921	0.255	0.793	0.667295
209	SSTR3_KAN522-3_6.tif:0003-0963	0.419	3	0	14	10.704	98.608	0.646	1.258	120	2.872	0.348	0.851	0.00520133			213	ADCY3_KAN522-3_6.tif:0003-0963	0.419	104.85	46	162	10.704	98.608	0.646	43.961	4194	2.872	0.348	0.851	0.0475724
210	SSTR3_KAN522-3_6.tif:0004-1027	0.713	5.25	0	22	13.046	105.199	0.709	3.742	357	2.959	0.338	0.965	0.0154739			214	ADCY3_KAN522-3_6.tif:0004-1027	0.713	95.324	43	169	13.046	105.199	0.709	67.943	6482	2.959	0.338	0.965	0.0735251
215	SSTR3_KAN522-3_7.tif:0001-0238	2.233	18.3	0	109	50.355	24.287	0.616	40.858	3898	2.7	0.37	0.822	0.168956			218	ADCY3_KAN522-3_7.tif:0001-0238	2.233	254.484	0	818	50.355	24.287	0.616	568.169	54205	2.7	0.37	0.822	0.614845
216	SSTR3_KAN522-3_7.tif:0002-0427	3.847	146.97	0	602	62.403	43.561	0.327	565.371	53938	5.824	0.172	0.813	2.33791			219	ADCY3_KAN522-3_7.tif:0002-0427	3.847	293.717	0	921	62.403	43.561	0.327	1129.88	107794	5.824	0.172	0.813	1.2227
217	SSTR3_KAN522-3_7.tif:0003-0578	2.61	49.237	0	228	62.044	59.287	0.56	128.508	12260	3.072	0.325	0.781	0.531402			220	ADCY3_KAN522-3_7.tif:0003-0578	2.61	251.542	0	926	62.044	59.287	0.56	656.521	62634	3.072	0.325	0.781	0.710455
221	SSTR3_KAN522-3_8.tif:0001-0237	3.732	19.531	0	126	113.255	24.3	0.454	72.88	6953	4.599	0.217	0.793	0.301373			226	ADCY3_KAN522-3_8.tif:0001-0237	3.732	332.885	0	1351	113.255	24.3	0.454	1242.17	118507	4.599	0.217	0.793	1.34422
222	SSTR3_KAN522-3_8.tif:0002-0308	2.945	73.751	0	248	96.492	31.796	0.498	217.226	20724	2.819	0.355	0.714	0.898269			227	ADCY3_KAN522-3_8.tif:0002-0308	2.945	400.73	0	1274	96.492	31.796	0.498	1180.31	112605	2.819	0.355	0.714	1.27727
223	SSTR3_KAN522-3_8.tif:0003-0373	2.453	158.953	0	706	56.373	38.207	0.531	389.873	37195	3.909	0.256	0.903	1.61219			228	ADCY3_KAN522-3_8.tif:0003-0373	2.453	306.795	0	1042	56.373	38.207	0.531	752.493	71790	3.909	0.256	0.903	0.814311
224	SSTR3_KAN522-3_8.tif:0004-0415	3.291	119.14	0	374	23.094	42.495	0.352	392.126	37410	6.406	0.156	0.816	1.62151			229	ADCY3_KAN522-3_8.tif:0004-0415	3.291	195.873	1	699	23.094	42.495	0.352	644.676	61504	6.406	0.156	0.816	0.697637
225	SSTR3_KAN522-3_8.tif:0005-0561	1.467	16.729	0	631	32.869	57.436	0.479	24.549	2342	4.061	0.246	0.831	0.101513			230	ADCY3_KAN522-3_8.tif:0005-0561	1.467	120.814	9	530	32.869	57.436	0.479	177.29	16914	4.061	0.246	0.831	0.191855
231	SSTR3_KAN522-3_9.tif:0001-0216	2.862	6.641	0	49	67.114	22.044	0.515	19.004	1813	4.143	0.241	0.854	0.0785834			233	ADCY3_KAN522-3_9.tif:0001-0216	2.862	236.56	2	758	67.114	22.044	0.515	676.929	64581	4.143	0.241	0.854	0.73254
232	SSTR3_KAN522-3_9.tif:0002-0685	3.753	59.237	0	269	94.087	70.059	0.469	222.289	21207	4.184	0.239	0.839	0.919204			234	ADCY3_KAN522-3_9.tif:0002-0685	3.753	279.955	0	1011	94.087	70.059	0.469	1050.53	100224	4.184	0.239	0.839	1.13684
										20165				0.874039													70788.6				0.802952
235	SSTR3_KAN522-4_1.tif:0001-0361	3.805	4.7	0	62	69.335	37.195	0.383	17.882	1706	4.349	0.23	0.688	0.0739455			239	ADCY3_KAN522-4_1.tif:0001-0361	3.805	189.716	0	558	69.335	37.195	0.383	721.854	68867	4.349	0.23	0.688	0.781155
236	SSTR3_KAN522-4_1.tif:0002-0417	1.824	12.839	0	61	84.475	42.695	0.557	23.416	2234	3.586	0.279	0.833	0.0968313			240	ADCY3_KAN522-4_1.tif:0002-0417	1.824	151.856	12	416	84.475	42.695	0.557	276.962	26423	3.586	0.279	0.833	0.299715
237	SSTR3_KAN522-4_1.tif:0003-0459	2.369	4.394	0	34	83.103	47.029	0.23	10.408	993	9.067	0.11	0.693	0.043041			241	ADCY3_KAN522-4_1.tif:0003-0459	2.369	110.513	15	232	83.103	47.029	0.23	261.795	24976	9.067	0.11	0.693	0.283302
238	SSTR3_KAN522-4_1.tif:0004-0509	1.939	6.157	0	45	82.744	52.177	0.479	11.939	1139	3.418	0.293	0.743	0.0493693			242	ADCY3_KAN522-4_1.tif:0004-0509	1.939	165.524	19	733	82.744	52.177	0.479	320.975	30622	3.418	0.293	0.743	0.347344
243	SSTR3_KAN522-4_10.tif:0001-0618	5.031	17.31	0	176	64.508	63.155	0.291	87.094	8309	7.19	0.139	0.741	0.360148			245	ADCY3_KAN522-4_10.tif:0001-0618	5.031	271.148	0	1399	64.508	63.155	0.291	1364.22	130151	7.19	0.139	0.741	1.4763
244	SSTR3_KAN522-4_10.tif:0002-0762	5.01	9.132	0	70	44.657	78.015	0.331	45.753	4365	3.293	0.304	0.584	0.189198			246	ADCY3_KAN522-4_10.tif:0002-0762	5.01	296.18	0	1157	44.657	78.015	0.331	1483.96	141574	3.293	0.304	0.584	1.60587
247	SSTR3_KAN522-4_11.tif:0001-0489	4.025	43.289	0	177	51.416	50.017	0.363	174.24	16623	5.608	0.178	0.765	0.720514			249	ADCY3_KAN522-4_11.tif:0001-0489	4.025	241.964	0	706	51.416	50.017	0.363	973.911	92914	5.608	0.178	0.765	1.05392
248	SSTR3_KAN522-4_11.tif:0002-0594	3.145	11.897	0	65	48.071	60.839	0.422	37.41	3569	5.221	0.192	0.873	0.154696			250	ADCY3_KAN522-4_11.tif:0002-0594	3.145	277.29	0	782	48.071	60.839	0.422	871.954	83187	5.221	0.192	0.873	0.943587
251	SSTR3_KAN522-4_12.tif:0001-0241	3.69	47.98	0	268	119.288	24.59	0.434	177.028	16889	4.773	0.21	0.794	0.732043			255	ADCY3_KAN522-4_12.tif:0001-0241	3.69	297.665	0	1340	119.288	24.59	0.434	1098.27	104778	4.773	0.21	0.794	1.18849
252	SSTR3_KAN522-4_12.tif:0002-0278	3.207	79.02	0	391	101.572	28.556	0.568	253.451	24180	3.509	0.285	0.871	1.04807			256	ADCY3_KAN522-4_12.tif:0002-0278	3.207	337.493	0	1147	101.572	28.556	0.568	1082.49	103273	3.509	0.285	0.871	1.17142
253	SSTR3_KAN522-4_12.tif:0003-0420	2.033	15.629	0	66	102.245	43.098	0.747	31.781	3032	1.996	0.501	0.888	0.13142			257	ADCY3_KAN522-4_12.tif:0003-0420	2.033	362.711	0	1473	102.245	43.098	0.747	737.566	70366	1.996	0.501	0.888	0.798159
254	SSTR3_KAN522-4_12.tif:0004-0759	3.637	151.709	0	700	19.258	77.713	0.373	551.797	52643	5.335	0.187	0.757	2.28178			258	ADCY3_KAN522-4_12.tif:0004-0759	3.637	231.602	0	648	19.258	77.713	0.373	842.385	80366	5.335	0.187	0.757	0.911588
259	SSTR3_KAN522-4_2.tif:0001-0364	4.413	52.71	0	323	117.372	36.932	0.32	232.603	22191	4.38	0.228	0.609	0.961855			264	ADCY3_KAN522-4_2.tif:0001-0364	4.413	221.938	0	669	117.372	36.932	0.32	979.383	93436	4.38	0.228	0.609	1.05984
260	SSTR3_KAN522-4_2.tif:0002-0359	1.226	3.949	0	27	77.239	36.765	0.758	4.843	462	2.11	0.474	0.876	0.0200251			265	ADCY3_KAN522-4_2.tif:0002-0359	1.226	165.983	19	389	77.239	36.765	0.758	203.558	19420	2.11	0.474	0.876	0.22028
261	SSTR3_KAN522-4_2.tif:0003-0506	3.092	4.285	0	31	54.075	51.835	0.417	13.249	1264	4.263	0.235	0.753	0.0547873			266	ADCY3_KAN522-4_2.tif:0003-0506	3.092	178.888	12	648	54.075	51.835	0.417	553.149	52772	4.263	0.235	0.753	0.598591
262	SSTR3_KAN522-4_2.tif:0004-0545	0.66	31.349	0	86	91.268	55.849	0.766	20.702	1975	1.892	0.528	0.869	0.0856052			267	ADCY3_KAN522-4_2.tif:0004-0545	0.66	111.571	45	165	91.268	55.849	0.766	73.677	7029	1.892	0.528	0.869	0.0797296
263	SSTR3_KAN522-4_2.tif:0005-0691	4.172	17.987	0	144	59.507	70.523	0.282	75.04	7159	5.83	0.172	0.6	0.310302			268	ADCY3_KAN522-4_2.tif:0005-0691	4.172	192.143	8	989	59.507	70.523	0.282	801.579	76473	5.83	0.172	0.6	0.86743
269	SSTR3_KAN522-4_3.tif:0001-0464	1.918	303.536	0	1318	37.414	47.539	0.773	582.236	55547	2.037	0.491	0.908	2.40765			275	ADCY3_KAN522-4_3.tif:0001-0464	1.918	400.596	0	1662	37.414	47.539	0.773	768.415	73309	2.037	0.491	0.908	0.831541
270	SSTR3_KAN522-4_3.tif:0002-0463	2.589	93.134	0	456	82.361	47.486	0.473	241.125	23004	4.364	0.229	0.794	0.997094			276	ADCY3_KAN522-4_3.tif:0002-0463	2.589	232.684	0	945	82.361	47.486	0.473	602.424	57473	4.364	0.229	0.794	0.651914
271	SSTR3_KAN522-4_3.tif:0003-0490	2.411	9.678	0	42	103.459	50.11	0.471	23.333	2226	4.164	0.24	0.784	0.0964846			277	ADCY3_KAN522-4_3.tif:0003-0490	2.411	147.709	16	327	103.459	50.11	0.471	356.1	33973	4.164	0.24	0.784	0.385354
272	SSTR3_KAN522-4_3.tif:0004-0669	3.333	6.142	0	81	128.712	68.44	0.504	20.471	1953	4.192	0.239	0.817	0.0846516			278	ADCY3_KAN522-4_3.tif:0004-0669	3.333	345.39	0	1311	128.712	68.44	0.504	1151.27	109834	4.192	0.239	0.817	1.24584
273	SSTR3_KAN522-4_3.tif:0005-0687	5.105	402.125	0	1524	79.511	70.468	0.415	2052.72	195835	4.421	0.226	0.755	8.48835			279	ADCY3_KAN522-4_3.tif:0005-0687	5.105	406.148	0	1357	79.511	70.468	0.415	2073.25	197794	4.421	0.226	0.755	2.24357
274	SSTR3_KAN522-4_3.tif:0006-0711	4.78	296.752	0	1062	113.379	72.802	0.56	1418.39	135319	2.525	0.396	0.811	5.86532			280	ADCY3_KAN522-4_3.tif:0006-0711	4.78	310.561	0	1058	113.379	72.802	0.56	1484.4	141616	2.525	0.396	0.811	1.60634
281	SSTR3_KAN522-4_4.tif:0001-0361	5.503	15.25	0	141	40.987	37.231	0.255	83.918	8006	7.013	0.143	0.674	0.347015			284	ADCY3_KAN522-4_4.tif:0001-0361	5.503	273.509	0	1039	40.987	37.231	0.255	1505.11	143592	7.013	0.143	0.674	1.62876
282	SSTR3_KAN522-4_4.tif:0002-0453	4.298	4.1	0	28	45.67	46.449	0.249	17.62	1681	7.772	0.129	0.673	0.0728619			285	ADCY3_KAN522-4_4.tif:0002-0453	4.298	169.19	0	938	45.67	46.449	0.249	727.106	69368	7.772	0.129	0.673	0.786838
283	SSTR3_KAN522-4_4.tif:0003-0560	2.914	25.083	0	150	47.167	57.294	0.556	73.09	6973	3.084	0.324	0.794	0.30224			286	ADCY3_KAN522-4_4.tif:0003-0560	2.914	344.5	0	1445	47.167	57.294	0.556	1003.86	95771	3.084	0.324	0.794	1.08633
287	SSTR3_KAN522-4_5.tif:0001-0354	3.69	21.429	0	144	70.077	36.106	0.482	79.065	7543	3.938	0.254	0.81	0.326947			289	ADCY3_KAN522-4_5.tif:0001-0354	3.69	381.241	0	1425	70.077	36.106	0.482	1406.63	134197	3.938	0.254	0.81	1.52219
288	SSTR3_KAN522-4_5.tif:0002-0700	5.136	15.037	0	80	45.21	71.856	0.251	77.23	7368	7.284	0.137	0.646	0.319361			290	ADCY3_KAN522-4_5.tif:0002-0700	5.136	198.28	6	596	45.21	71.856	0.251	1018.39	97157	7.284	0.137	0.646	1.10205
291	SSTR3_KAN522-4_6.tif:0001-0384	5.115	91.611	0	515	86.705	39.035	0.313	468.602	44706	2.235	0.447	0.527	1.93775			294	ADCY3_KAN522-4_6.tif:0001-0384	5.115	188.613	0	654	86.705	39.035	0.313	964.782	92043	2.235	0.447	0.527	1.04404
292	SSTR3_KAN522-4_6.tif:0002-0773	2.673	3.537	0	36	70.979	79.374	0.412	9.455	902	2.649	0.377	0.661	0.0390966			295	ADCY3_KAN522-4_6.tif:0002-0773	2.673	176.231	6	730	70.979	79.374	0.412	471.044	44939	2.649	0.377	0.661	0.509741
293	SSTR3_KAN522-4_6.tif:0003-0821	3.501	4.59	0	82	70.483	83.839	0.254	16.069	1533	5.918	0.169	0.605	0.0664469			296	ADCY3_KAN522-4_6.tif:0003-0821	3.501	147.165	0	683	70.483	83.839	0.254	515.215	49153	5.918	0.169	0.605	0.55754
297	SSTR3_KAN522-4_7.tif:0001-0161	3.815	5.824	0	42	94.9	16.447	0.594	22.222	2120	3.179	0.315	0.893	0.0918901			302	ADCY3_KAN522-4_7.tif:0001-0161	3.815	305.799	0	1068	94.9	16.447	0.594	1166.75	111311	3.179	0.315	0.893	1.2626
298	SSTR3_KAN522-4_7.tif:0002-0285	2.254	67.237	0	227	88.668	29.147	0.68	151.526	14456	2.515	0.398	0.845	0.626586			303	ADCY3_KAN522-4_7.tif:0002-0285	2.254	322.944	0	1009	88.668	29.147	0.68	727.787	69433	2.515	0.398	0.845	0.787576
299	SSTR3_KAN522-4_7.tif:0003-0298	3.679	75.14	0	336	97.46	30.483	0.462	276.449	26374	4.368	0.229	0.871	1.14316			304	ADCY3_KAN522-4_7.tif:0003-0298	3.679	264.479	0	852	97.46	30.483	0.462	973.052	92832	4.368	0.229	0.871	1.05299
300	SSTR3_KAN522-4_7.tif:0004-0507	4.476	175.625	0	754	93.771	51.955	0.54	786.056	74992	3.662	0.273	0.871	3.25048			305	ADCY3_KAN522-4_7.tif:0004-0507	4.476	375.433	0	1486	93.771	51.955	0.54	1680.35	160310	3.662	0.273	0.871	1.81839
301	SSTR3_KAN522-4_7.tif:0005-0709	1.205	3.487	0	24	64.837	72.531	0.765	4.203	401	2.089	0.479	0.895	0.0173811			306	ADCY3_KAN522-4_7.tif:0005-0709	1.205	178.217	19	521	64.837	72.531	0.765	214.826	20495	2.089	0.479	0.895	0.232474
307	SSTR3_KAN522-4_8.tif:0001-0305	4.14	252.911	0	1410	84.213	31.314	0.397	1047.14	99900	4.036	0.248	0.706	4.3301			310	ADCY3_KAN522-4_8.tif:0001-0305	4.14	421.134	0	2995	84.213	31.314	0.397	1743.64	166348	4.036	0.248	0.706	1.88688
308	SSTR3_KAN522-4_8.tif:0002-0554	3.019	282.493	0	1051	38.258	56.67	0.612	852.783	81358	3.101	0.322	0.879	3.52641			311	ADCY3_KAN522-4_8.tif:0002-0554	3.019	419.274	0	1677	38.258	56.67	0.612	1265.69	120751	3.101	0.322	0.879	1.36967
309	SSTR3_KAN522-4_8.tif:0003-0620	3.637	146.824	0	637	44.942	63.416	0.429	534.03	50948	4.455	0.224	0.816	2.20831			312	ADCY3_KAN522-4_8.tif:0003-0620	3.637	321.867	0	1038	44.942	63.416	0.429	1170.7	111688	4.455	0.224	0.816	1.26687
313	SSTR3_KAN522-4_9.tif:0001-0284	4.56	157.979	0	627	25.531	29.169	0.386	720.324	68721	5.641	0.177	0.855	2.97867			318	ADCY3_KAN522-4_9.tif:0001-0284	4.56	380.66	11	1252	25.531	29.169	0.386	1735.66	165587	5.641	0.177	0.855	1.87825
314	SSTR3_KAN522-4_9.tif:0002-0304	3.417	61.129	0	269	131.52	31.09	0.672	208.882	19928	2.577	0.388	0.907	0.863767			319	ADCY3_KAN522-4_9.tif:0002-0304	3.417	436.025	0	1502	131.52	31.09	0.672	1489.93	142144	2.577	0.388	0.907	1.61233
315	SSTR3_KAN522-4_9.tif:0003-0402	3.92	6.425	0	42	33.662	41.275	0.318	25.188	2403	6.087	0.164	0.712	0.104157			320	ADCY3_KAN522-4_9.tif:0003-0402	3.92	237.332	11	654	33.662	41.275	0.318	930.391	88762	6.087	0.164	0.712	1.00682
316	SSTR3_KAN522-4_9.tif:0004-0501	2.903	450.379	0	1506	21.42	51.349	0.627	1307.66	124755	2.883	0.347	0.888	5.40743			321	ADCY3_KAN522-4_9.tif:0004-0501	2.903	398.379	0	1440	21.42	51.349	0.627	1156.68	110351	2.883	0.347	0.888	1.25171
317	SSTR3_KAN522-4_9.tif:0005-0777	2.044	88.349	0	328	14.481	79.617	0.707	180.581	17228	2.434	0.411	0.888	0.746737			322	ADCY3_KAN522-4_9.tif:0005-0777	2.044	311.81	0	1201	14.481	79.617	0.707	637.328	60803	2.434	0.411	0.888	0.689686
										28293.5				1.22636													90174.1				1.02284
										23071																	88160.4
327	SSTR3_KAN522-6_1.tif:0001-0645	5.671	37.211	0	205	74.025	66.309	0.223	211.01	20131	6.943	0.144	0.588	0.872566			329	ADCY3_KAN522-6_1.tif:0001-0645	5.671	190.773	0	634	74.025	66.309	0.223	1081.81	103208	6.943	0.144	0.588	1.17068
328	SSTR3_KAN522-6_1.tif:0002-0683	2.306	7.209	0	53	65.573	69.895	0.383	16.624	1586	5	0.2	0.73	0.0687442			330	ADCY3_KAN522-6_1.tif:0002-0683	2.306	154.186	4	492	65.573	69.895	0.383	355.555	33921	5	0.2	0.73	0.384764
331	SSTR3_KAN522-6_10.tif:0001-0537	3.69	22.091	0	143	69.58	54.707	0.235	81.507	7776	6.992	0.143	0.595	0.337046			333	ADCY3_KAN522-6_10.tif:0001-0537	3.69	157.239	15	616	69.58	54.707	0.235	580.15	55348	6.992	0.143	0.595	0.62781
332	SSTR3_KAN522-6_10.tif:0002-0644	3.931	65.811	0	405	63.224	65.967	0.302	258.682	24679	7.726	0.129	0.789	1.0697			334	ADCY3_KAN522-6_10.tif:0002-0644	3.931	211.48	3	891	63.224	65.967	0.302	831.264	79305	7.726	0.129	0.789	0.899553
335	SSTR3_KAN522-6_11.tif:0001-0713	2.453	51.59	0	188	33.903	73.093	0.476	126.537	12072	4.305	0.232	0.84	0.523253			337	ADCY3_KAN522-6_11.tif:0001-0713	2.453	166.457	0	574	33.903	73.093	0.476	408.279	38951	4.305	0.232	0.84	0.44182
336	SSTR3_KAN522-6_11.tif:0002-0745	2.537	21.756	0	107	31.208	76.376	0.423	55.187	5265	4.517	0.221	0.763	0.228208			338	ADCY3_KAN522-6_11.tif:0002-0745	2.537	189.186	4	536	31.208	76.376	0.423	479.891	45783	4.517	0.221	0.763	0.519315
339	SSTR3_KAN522-6_12.tif:0001-0316	2.641	14.099	0	77	53.389	32.211	0.304	37.242	3553	6.637	0.151	0.689	0.154003			341	ADCY3_KAN522-6_12.tif:0001-0316	2.641	128.282	13	335	53.389	32.211	0.304	338.847	32327	6.637	0.151	0.689	0.366684
340	SSTR3_KAN522-6_12.tif:0002-0466	3.124	58.574	0	248	53.703	47.908	0.443	182.961	17455	3.495	0.286	0.707	0.756576			342	ADCY3_KAN522-6_12.tif:0002-0466	3.124	203.386	16	615	53.703	47.908	0.443	635.295	60609	3.495	0.286	0.707	0.687485
343	SSTR3_KAN522-6_2.tif:0001-0527	1.845	8.676	0	55	92.131	54.073	0.362	16.006	1527	3.82	0.262	0.625	0.0661869			346	ADCY3_KAN522-6_2.tif:0001-0527	1.845	113.511	0	214	92.131	54.073	0.362	209.407	19978	3.82	0.262	0.625	0.22661
344	SSTR3_KAN522-6_2.tif:0002-0593	2.778	36.709	0	261	54.865	60.761	0.343	101.968	9728	4.419	0.226	0.679	0.421654			347	ADCY3_KAN522-6_2.tif:0002-0593	2.778	194.694	8	804	54.865	60.761	0.343	540.801	51594	4.419	0.226	0.679	0.585229
345	SSTR3_KAN522-6_2.tif:0003-0638	1.834	2.794	0	36	110.45	65.35	0.655	5.126	489	2.527	0.396	0.856	0.0211954			348	ADCY3_KAN522-6_2.tif:0003-0638	1.834	205.543	0	559	110.45	65.35	0.655	377.032	35970	2.527	0.396	0.856	0.408006
349	SSTR3_KAN522-6_3.tif:0001-0240	1.163	32.946	0	139	49.165	24.63	0.716	38.332	3657	2.469	0.405	0.933	0.15851			351	ADCY3_KAN522-6_3.tif:0001-0240	1.163	124.64	1	300	49.165	24.63	0.716	145.017	13835	2.469	0.405	0.933	0.15693
350	SSTR3_KAN522-6_3.tif:0002-0391	3.49	18.06	0	144	32.521	39.84	0.373	63.038	6014	4.54	0.22	0.695	0.260673			352	ADCY3_KAN522-6_3.tif:0002-0391	3.49	218.009	0	648	32.521	39.84	0.373	760.952	72597	4.54	0.22	0.695	0.823465
353	SSTR3_KAN522-6_4.tif:0001-0536	1.876	9.598	0	44	106.727	54.953	0.47	18.008	1718	4.866	0.205	0.81	0.0744656			355	ADCY3_KAN522-6_4.tif:0001-0536	1.876	137.855	8	367	106.727	54.953	0.47	258.65	24676	4.866	0.205	0.81	0.279899
354	SSTR3_KAN522-6_4.tif:0002-0804	2.62	72.028	0	236	56.193	82.455	0.464	188.747	18007	4.32	0.232	0.8	0.780502			356	ADCY3_KAN522-6_4.tif:0002-0804	2.62	195.336	0	547	56.193	82.455	0.464	511.871	48834	4.32	0.232	0.8	0.553922
357	SSTR3_KAN522-6_5.tif:0001-0072	0.996	3.916	0	17	130.824	7.336	0.615	3.899	372	2.581	0.387	0.792	0.0161241			364	ADCY3_KAN522-6_5.tif:0001-0072	0.996	125.8	31	295	130.824	7.336	0.615	125.269	11951	2.581	0.387	0.792	0.13556
358	SSTR3_KAN522-6_5.tif:0002-0276	1.446	48.13	0	373	82.515	28.247	0.723	69.621	6642	2.229	0.449	0.896	0.287893			365	ADCY3_KAN522-6_5.tif:0002-0276	1.446	293.043	0	1066	82.515	28.247	0.723	423.886	40440	2.229	0.449	0.896	0.458709
359	SSTR3_KAN522-6_5.tif:0003-0477	0.597	12.737	0	48	84.316	48.82	0.669	7.61	726	2.732	0.366	0.87	0.031468			366	ADCY3_KAN522-6_5.tif:0003-0477	0.597	121.281	28	261	84.316	48.82	0.669	72.461	6913	2.732	0.366	0.87	0.0784139
360	SSTR3_KAN522-6_5.tif:0004-0483	0.367	3.143	0	14	82.983	49.463	0.616	1.153	110	2.785	0.359	0.769	0.00476788			367	ADCY3_KAN522-6_5.tif:0004-0483	0.367	98	35	168	82.983	49.463	0.616	35.953	3430	2.785	0.359	0.769	0.0389063
361	SSTR3_KAN522-6_5.tif:0005-0493	1.855	7.085	0	44	79.257	50.439	0.381	13.144	1254	5.259	0.19	0.829	0.0543539			368	ADCY3_KAN522-6_5.tif:0005-0493	1.855	122.65	9	275	79.257	50.439	0.381	227.551	21709	5.259	0.19	0.829	0.246244
362	SSTR3_KAN522-6_5.tif:0006-0557	3.91	41.721	0	184	108.024	57.187	0.293	163.119	15562	6.751	0.148	0.681	0.674525			369	ADCY3_KAN522-6_5.tif:0006-0557	3.91	211.501	0	803	108.024	57.187	0.293	826.914	78890	6.751	0.148	0.681	0.894846
363	SSTR3_KAN522-6_5.tif:0007-0622	0.22	2.571	0	9	80.786	63.732	0.772	0.566	54	2.36	0.424	0.857	0.0023406			370	ADCY3_KAN522-6_5.tif:0007-0622	0.22	95.667	43	124	80.786	63.732	0.772	21.058	2009	2.36	0.424	0.857	0.022788
371	SSTR3_KAN522-6_6.tif:0001-0318	2.201	151.276	0	555	122.179	32.548	0.761	332.988	31768	2.171	0.461	0.905	1.37696			374	ADCY3_KAN522-6_6.tif:0001-0318	2.201	381.552	0	1337	122.179	32.548	0.761	839.869	80126	2.171	0.461	0.905	0.908866
372	SSTR3_KAN522-6_6.tif:0002-0424	1.75	4.796	0	41	91.198	43.474	0.596	8.396	801	3.232	0.309	0.843	0.0347188			375	ADCY3_KAN522-6_6.tif:0002-0424	1.75	197.479	14	728	91.198	43.474	0.596	345.681	32979	3.232	0.309	0.843	0.374079
373	SSTR3_KAN522-6_6.tif:0003-0428	4.465	41.39	0	199	28.099	43.735	0.182	184.816	17632	12.275	0.081	0.646	0.764248			376	ADCY3_KAN522-6_6.tif:0003-0428	4.465	135.516	6	454	28.099	43.735	0.182	605.118	57730	12.275	0.081	0.646	0.654829
377	SSTR3_KAN522-6_7.tif:0001-0278	3.532	4.632	0	49	90.814	28.478	0.529	16.362	1561	3.769	0.265	0.866	0.0676606			380	ADCY3_KAN522-6_7.tif:0001-0278	3.532	325.341	4	998	90.814	28.478	0.529	1149.23	109640	3.769	0.265	0.866	1.24364
378	SSTR3_KAN522-6_7.tif:0002-0440	2.966	101.329	0	393	77.706	44.929	0.481	300.578	28676	3.74	0.267	0.78	1.24294			381	ADCY3_KAN522-6_7.tif:0002-0440	2.966	252.859	17	858	77.706	44.929	0.481	750.071	71559	3.74	0.267	0.78	0.811691
379	SSTR3_KAN522-6_7.tif:0003-0797	2.086	21.085	0	102	33.125	81.61	0.496	43.982	4196	4.134	0.242	0.863	0.181873			382	ADCY3_KAN522-6_7.tif:0003-0797	2.086	162.98	18	471	33.125	81.61	0.496	339.958	32433	4.134	0.242	0.863	0.367886
383	SSTR3_KAN522-6_8.tif:0001-0227	2.683	35.367	0	198	85.122	23.182	0.534	94.903	9054	3.518	0.284	0.83	0.39244			385	ADCY3_KAN522-6_8.tif:0001-0227	2.683	307.066	0	897	85.122	23.182	0.534	823.968	78609	3.518	0.284	0.83	0.891659
384	SSTR3_KAN522-6_8.tif:0002-0403	1.216	102.052	0	654	71.317	41.27	0.789	124.084	11838	2.062	0.485	0.917	0.513111			386	ADCY3_KAN522-6_8.tif:0002-0403	1.216	215.198	0	735	71.317	41.27	0.789	261.659	24963	2.062	0.485	0.917	0.283154
387	SSTR3_KAN522-6_9.tif:0001-0391	3.061	18.315	0	143	75.629	40.08	0.27	56.057	5348	6.405	0.156	0.631	0.231806			391	ADCY3_KAN522-6_9.tif:0001-0391	3.061	137.082	12	438	75.629	40.08	0.27	419.568	40028	6.405	0.156	0.631	0.454036
388	SSTR3_KAN522-6_9.tif:0002-0451	3.407	40.234	0	198	64.424	46.371	0.35	137.061	13076	4.247	0.235	0.61	0.566771			392	ADCY3_KAN522-6_9.tif:0002-0451	3.407	208.406	0	736	64.424	46.371	0.35	709.957	67732	4.247	0.235	0.61	0.768281
389	SSTR3_KAN522-6_9.tif:0003-0506	2.872	34.161	0	147	58.069	51.92	0.526	98.11	9360	3.153	0.317	0.811	0.405703			393	ADCY3_KAN522-6_9.tif:0003-0506	2.872	298.077	0	1212	58.069	51.92	0.526	856.085	81673	3.153	0.317	0.811	0.926413
390	SSTR3_KAN522-6_9.tif:0004-0507	3.344	94.132	0	374	81.855	51.84	0.428	314.749	30028	4.396	0.227	0.776	1.30155			394	ADCY3_KAN522-6_9.tif:0004-0507	3.344	237.708	0	736	81.855	51.84	0.428	794.829	75829	4.396	0.227	0.776	0.860125
										9462.21				0.410133													48105.3				0.545656
395	SSTR3_KAN522-7_1.tif:0001-0291	3.564	28.585	0	153	85.74	29.716	0.57	101.873	9719	3.341	0.299	0.867	0.421264			397	ADCY3_KAN522-7_1.tif:0001-0291	3.564	296.106	0	977	85.74	29.716	0.57	1055.27	100676	3.341	0.299	0.867	1.14196
396	SSTR3_KAN522-7_1.tif:0002-0739	2.61	6.213	0	60	60.518	75.734	0.506	16.215	1547	3.883	0.258	0.831	0.0670538			398	ADCY3_KAN522-7_1.tif:0002-0739	2.61	198.839	32	545	60.518	75.734	0.506	518.967	49511	3.883	0.258	0.831	0.561601
399	SSTR3_KAN522-7_10.tif:0001-0334	2.579	8.272	0	82	75.898	34.219	0.442	21.331	2035	5.141	0.195	0.834	0.0882058			402	ADCY3_KAN522-7_10.tif:0001-0334	2.579	173.862	16	437	75.898	34.219	0.442	448.309	42770	5.141	0.195	0.834	0.485138
400	SSTR3_KAN522-7_10.tif:0002-0577	2.044	23.836	0	104	29.271	59.206	0.522	48.72	4648	3.488	0.287	0.791	0.201465			403	ADCY3_KAN522-7_10.tif:0002-0577	2.044	201.333	0	619	29.271	59.206	0.522	411.518	39260	3.488	0.287	0.791	0.445325
401	SSTR3_KAN522-7_10.tif:0003-0929	1.153	3.173	0	16	20.376	95.101	0.56	3.658	349	3.234	0.309	0.786	0.0151272			404	ADCY3_KAN522-7_10.tif:0003-0929	1.153	113.4	18	284	20.376	95.101	0.56	130.751	12474	3.234	0.309	0.786	0.141492
405	SSTR3_KAN522-7_11.tif:0001-0312	3.134	65.916	0	316	111.321	31.872	0.689	206.587	19709	2.474	0.404	0.878	0.854274			409	ADCY3_KAN522-7_11.tif:0001-0312	3.134	385.351	0	1354	111.321	31.872	0.689	1207.72	115220	2.474	0.404	0.878	1.30694
406	SSTR3_KAN522-7_11.tif:0002-0419	0.545	4.462	0	20	113.749	42.87	0.736	2.432	232	2.143	0.467	0.8	0.0100559			410	ADCY3_KAN522-7_11.tif:0002-0419	0.545	106.846	61	160	113.749	42.87	0.736	58.237	5556	2.143	0.467	0.8	0.0630215
407	SSTR3_KAN522-7_11.tif:0003-0462	3.48	12.708	0	100	103.781	47.397	0.466	44.223	4219	4.833	0.207	0.879	0.18287			411	ADCY3_KAN522-7_11.tif:0003-0462	3.48	270.63	0	757	103.781	47.397	0.466	941.785	89849	4.833	0.207	0.879	1.01915
408	SSTR3_KAN522-7_11.tif:0004-0474	2.505	22.715	0	129	28.148	48.716	0.49	56.906	5429	3.897	0.257	0.812	0.235317			412	ADCY3_KAN522-7_11.tif:0004-0474	2.505	198.18	0	601	28.148	48.716	0.49	496.473	47365	3.897	0.257	0.812	0.537259
413	SSTR3_KAN522-7_12.tif:0001-0280	2.977	26.718	0	175	111.347	28.68	0.435	79.536	7588	4.864	0.206	0.84	0.328897			415	ADCY3_KAN522-7_12.tif:0001-0280	2.977	242.627	0	712	111.347	28.68	0.435	722.263	68906	4.864	0.206	0.84	0.781598
414	SSTR3_KAN522-7_12.tif:0002-0404	2.254	20.279	0	110	59.902	41.371	0.767	45.701	4360	1.961	0.51	0.903	0.188982			416	ADCY3_KAN522-7_12.tif:0002-0404	2.254	410.767	0	1956	59.902	41.371	0.767	925.705	88315	1.961	0.51	0.903	1.00175
417	SSTR3_KAN522-7_2.tif:0001-0197	2.683	17.371	0	124	123.892	20.237	0.536	46.613	4447	3.679	0.272	0.843	0.192752			419	ADCY3_KAN522-7_2.tif:0001-0197	2.683	209.348	0	554	123.892	20.237	0.536	561.754	53593	3.679	0.272	0.843	0.607903
418	SSTR3_KAN522-7_2.tif:0002-0831	1.771	11.556	0	89	10.767	85.079	0.353	20.471	1953	6.653	0.15	0.862	0.0846516			420	ADCY3_KAN522-7_2.tif:0002-0831	1.771	112.195	31	239	10.767	85.079	0.353	198.747	18961	6.653	0.15	0.862	0.215074
421	SSTR3_KAN522-7_3.tif:0001-0670	3.878	5.346	0	33	58.514	68.708	0.389	20.733	1978	5.631	0.178	0.82	0.0857352			423	ADCY3_KAN522-7_3.tif:0001-0670	3.878	214.949	3	584	58.514	68.708	0.389	833.633	79531	5.631	0.178	0.82	0.902117
422	SSTR3_KAN522-7_3.tif:0002-0759	2.799	50.464	0	238	99.24	77.725	0.436	141.233	13474	4.994	0.2	0.849	0.584022			424	ADCY3_KAN522-7_3.tif:0002-0759	2.799	242.888	0	826	99.24	77.725	0.436	679.759	64851	4.994	0.2	0.849	0.735602
425	SSTR3_KAN522-7_4.tif:0001-0321	2.987	6.102	0	36	58.775	32.85	0.39	18.228	1739	4.242	0.236	0.707	0.0753759			427	ADCY3_KAN522-7_4.tif:0001-0321	2.987	183.372	0	578	58.775	32.85	0.39	547.792	52261	4.242	0.236	0.707	0.592794
426	SSTR3_KAN522-7_4.tif:0002-0659	1.908	21.319	0	87	53.369	67.438	0.487	40.67	3880	3.612	0.277	0.747	0.168176			428	ADCY3_KAN522-7_4.tif:0002-0659	1.908	138.753	10	440	53.369	67.438	0.487	264.698	25253	3.612	0.277	0.747	0.286444
429	SSTR3_KAN522-7_5.tif:0001-0371	2.463	201.255	0	963	46.826	38.086	0.517	495.74	47295	3.007	0.333	0.759	2.04997			431	ADCY3_KAN522-7_5.tif:0001-0371	2.463	246.557	0	1001	46.826	38.086	0.517	607.329	57941	3.007	0.333	0.759	0.657222
430	SSTR3_KAN522-7_5.tif:0002-0480	2.254	40.214	0	216	52.432	49.006	0.486	90.626	8646	3.185	0.314	0.748	0.374756			432	ADCY3_KAN522-7_5.tif:0002-0480	2.254	202.46	8	747	52.432	49.006	0.486	456.265	43529	3.185	0.314	0.748	0.493748
433	SSTR3_KAN522-7_6.tif:0001-0187	4.015	113.817	0	607	124.156	19.174	0.332	456.925	43592	6.289	0.159	0.734	1.88947			436	ADCY3_KAN522-7_6.tif:0001-0187	4.015	249.909	0	1418	124.156	19.174	0.332	1003.27	95715	6.289	0.159	0.734	1.08569
434	SSTR3_KAN522-7_6.tif:0002-0745	3.889	6.795	0	68	36.74	76.189	0.291	26.425	2521	6.163	0.162	0.65	0.109271			437	ADCY3_KAN522-7_6.tif:0002-0745	3.889	173.685	12	540	36.74	76.189	0.291	675.42	64437	6.163	0.162	0.65	0.730906
435	SSTR3_KAN522-7_6.tif:0003-0859	1.918	3.902	0	25	45.18	88.014	0.418	7.484	714	4.815	0.208	0.758	0.0309479			438	ADCY3_KAN522-7_6.tif:0003-0859	1.918	138.109	16	398	45.18	88.014	0.418	264.919	25274	4.815	0.208	0.758	0.286682
439	SSTR3_KAN522-7_7.tif:0001-0265	2.788	16.789	0	123	57.967	27.113	0.411	46.812	4466	5.106	0.196	0.786	0.193576			443	ADCY3_KAN522-7_7.tif:0001-0265	2.788	171.203	3	590	57.967	27.113	0.411	477.344	45540	5.106	0.196	0.786	0.516558
440	SSTR3_KAN522-7_7.tif:0002-0321	3.312	40.747	0	136	71.916	32.827	0.296	134.964	12876	4.971	0.201	0.648	0.558102			444	ADCY3_KAN522-7_7.tif:0002-0321	3.312	144.459	0	343	71.916	32.827	0.296	478.486	45649	4.971	0.201	0.648	0.517795
441	SSTR3_KAN522-7_7.tif:0003-0433	1.604	23.275	0	88	72.665	44.391	0.594	37.326	3561	2.72	0.368	0.82	0.154349			445	ADCY3_KAN522-7_7.tif:0003-0433	1.604	134.961	21	264	72.665	44.391	0.594	216.44	20649	2.72	0.368	0.82	0.234221
442	SSTR3_KAN522-7_7.tif:0004-0539	3.794	3.215	0	33	88.17	55.066	0.301	12.201	1164	7.129	0.14	0.758	0.0504529			446	ADCY3_KAN522-7_7.tif:0004-0539	3.794	190.58	2	652	88.17	55.066	0.301	723.143	68990	7.129	0.14	0.758	0.782551
447	SSTR3_KAN522-7_8.tif:0001-0167	3.564	23.253	0	137	86.342	17.06	0.516	82.87	7906	3.233	0.309	0.795	0.342681			449	ADCY3_KAN522-7_8.tif:0001-0167	3.564	379.409	0	1313	86.342	17.06	0.516	1352.15	128999	3.233	0.309	0.795	1.46323
448	SSTR3_KAN522-7_8.tif:0002-0473	2.662	10.63	0	99	57.366	48.38	0.504	28.301	2700	3.858	0.259	0.852	0.11703			450	ADCY3_KAN522-7_8.tif:0002-0473	2.662	279.512	4	1147	57.366	48.38	0.504	744.17	70996	3.858	0.259	0.852	0.805305
451	SSTR3_KAN522-7_9.tif:0001-0529	5.482	3.25	0	52	75.888	54.051	0.183	17.819	1700	12.111	0.083	0.729	0.0736854			453	ADCY3_KAN522-7_9.tif:0001-0529	5.482	163.356	1	748	75.888	54.051	0.183	895.518	85435	12.111	0.083	0.729	0.969086
452	SSTR3_KAN522-7_9.tif:0002-0839	2.757	12.578	0	99	91.611	85.929	0.547	34.674	3308	3.729	0.268	0.832	0.143383			454	ADCY3_KAN522-7_9.tif:0002-0839	2.757	259.631	0	727	91.611	85.929	0.547	715.733	68283	3.729	0.268	0.832	0.774531
										7591.83				0.329063													59193				0.671423

## Sheet: KAN530_exp.1
	Label	Area	Mean	Min	Max	X	Y	Circ	IntDen	RawIntDen	AR	Round	Solidity						Label	Area	Mean	Min	Max	X	Y	Circ	IntDen	RawIntDen	AR	Round	Solidity
1	SSTR3_KAN530-1_1.tif:0001-0345	6.321	7.078	0	67	32.25	35.184	0.258	44.737	4268	7.599	0.132	0.659	0.423068				3	ADCY3_KAN530-1_1.tif:0001-0345	6.321	52.036	0	247	32.25	35.184	0.258	328.9	31378	7.599	0.132	0.659	1.112
2	SSTR3_KAN530-1_1.tif:0002-0467	4.675	47.433	0	251	72.119	47.679	0.339	221.744	21155	6.189	0.162	0.8	2.097				4	ADCY3_KAN530-1_1.tif:0002-0467	4.675	55.87	0	210	72.119	47.679	0.339	261.187	24918	6.189	0.162	0.8	0.883061
5	SSTR3_KAN530-1_10.tif:0001-0123	3.26	6.595	0	42	74.026	12.534	0.639	21.498	2051	2.638	0.379	0.863	0.203307				8	ADCY3_KAN530-1_10.tif:0001-0123	3.26	92.01	0	454	74.026	12.534	0.639	299.938	28615	2.638	0.379	0.863	1.01408
6	SSTR3_KAN530-1_10.tif:0002-0779	3.606	4.32	0	31	99.847	79.797	0.443	15.576	1486	4.257	0.235	0.803	0.147301				9	ADCY3_KAN530-1_10.tif:0002-0779	3.606	55.959	0	301	99.847	79.797	0.443	201.776	19250	4.257	0.235	0.803	0.682195
7	SSTR3_KAN530-1_10.tif:0003-0791	2.285	3.44	0	19	84.017	81.016	0.731	7.861	750	2.414	0.414	0.938	0.0743442				10	ADCY3_KAN530-1_10.tif:0003-0791	2.285	102.073	0	446	84.017	81.016	0.731	233.242	22252	2.414	0.414	0.938	0.788582
11	SSTR3_KAN530-1_11.tif:0001-0450	3.124	4.698	0	29	128.194	46.123	0.613	14.675	1400	2.917	0.343	0.854	0.138776				14	ADCY3_KAN530-1_11.tif:0001-0450	3.124	60.094	0	401	128.194	46.123	0.613	187.709	17908	2.917	0.343	0.854	0.634636
12	SSTR3_KAN530-1_11.tif:0002-0570	4.885	28.067	0	193	97.714	58.349	0.56	137.092	13079	3.046	0.328	0.834	1.29646				15	ADCY3_KAN530-1_11.tif:0002-0570	4.885	143.427	0	639	97.714	58.349	0.56	700.576	66837	3.046	0.328	0.834	2.36862
13	SSTR3_KAN530-1_11.tif:0003-0632	5.87	4.45	0	51	75.41	64.414	0.263	26.121	2492	3.565	0.28	0.509	0.247021				16	ADCY3_KAN530-1_11.tif:0003-0632	5.87	48.307	0	284	75.41	64.414	0.263	283.555	27052	3.565	0.28	0.509	0.958687
17	SSTR3_KAN530-1_12.tif:0001-0620	1.792	28.749	0	126	44.052	63.447	0.723	51.529	4916	2.443	0.409	0.864	0.487302				19	ADCY3_KAN530-1_12.tif:0001-0620	1.792	50.211	0	162	44.052	63.447	0.723	89.997	8586	2.443	0.409	0.864	0.304277
18	SSTR3_KAN530-1_12.tif:0002-0649	3.931	26.509	0	151	60.742	66.564	0.562	104.2	9941	3.32	0.301	0.864	0.985408				20	ADCY3_KAN530-1_12.tif:0002-0649	3.931	78.667	0	310	60.742	66.564	0.562	309.215	29500	3.32	0.301	0.864	1.04544
21	SSTR3_KAN530-1_2.tif:0001-0309	5.251	8.645	0	61	62.998	31.53	0.404	45.397	4331	3.289	0.304	0.692	0.429313				23	ADCY3_KAN530-1_2.tif:0001-0309	5.251	71.581	0	452	62.998	31.53	0.404	375.9	35862	3.289	0.304	0.692	1.2709
22	SSTR3_KAN530-1_2.tif:0002-0440	2.883	7.211	0	64	53.42	45.056	0.552	20.786	1983	3.328	0.3	0.83	0.196566				24	ADCY3_KAN530-1_2.tif:0002-0440	2.883	59.862	0	217	53.42	45.056	0.552	172.552	16462	3.328	0.3	0.83	0.583392
25	SSTR3_KAN530-1_3.tif:0001-0001-0184:c:4/4 z:1/4 - KAN530-1_3	7.348	6.3	0	39	89.096	18.804	0.721	46.288	4416	2.107	0.475	0.894	0.437739				27	ADCY3_KAN530-1_3.tif:0001-0001-0184:c:4/4 z:1/4 - KAN530-1_3	7.348	13.866	0	91	89.096	18.804	0.721	101.884	9720	2.107	0.475	0.894	0.344464
26	SSTR3_KAN530-1_3.tif:0001-0002-0333:c:4/4 z:1/4 - KAN530-1_3	6.352	65.731	0	684	82.257	34.023	0.759	417.524	39833	1.841	0.543	0.927	3.94847				28	ADCY3_KAN530-1_3.tif:0001-0002-0333:c:4/4 z:1/4 - KAN530-1_3	6.352	39.87	0	416	82.257	34.023	0.759	253.252	24161	1.841	0.543	0.927	0.856234
29	SSTR3_KAN530-1_4.tif:0001-0332	2.767	167.553	0	735	67.114	34.033	0.704	463.655	44234	2.493	0.401	0.928	4.38472				31	ADCY3_KAN530-1_4.tif:0001-0332	2.767	157.273	0	691	67.114	34.033	0.704	435.207	41520	2.493	0.401	0.928	1.47141
30	SSTR3_KAN530-1_4.tif:0002-0716	7.337	54.279	0	316	79.5	73.414	0.327	398.258	37995	6.222	0.161	0.737	3.76628				32	ADCY3_KAN530-1_4.tif:0002-0716	7.337	75.69	0	382	79.5	73.414	0.327	555.36	52983	6.222	0.161	0.737	1.87765
33	SSTR3_KAN530-1_5.tif:0001-0001-0406:c:4/4 z:1/2 - KAN530-1_5	1.698	36.549	0	220	74.04	41.466	0.297	62.063	5921	6.627	0.151	0.672	0.586923				38	ADCY3_KAN530-1_5.tif:0001-0001-0406:c:4/4 z:1/2 - KAN530-1_5	1.698	55	3	179	74.04	41.466	0.297	93.393	8910	6.627	0.151	0.672	0.315759
34	SSTR3_KAN530-1_5.tif:0001-0002-0553:c:4/4 z:1/2 - KAN530-1_5	2.82	3.978	0	26	74.374	56.61	0.305	11.216	1070	6.993	0.143	0.686	0.106064				39	ADCY3_KAN530-1_5.tif:0001-0002-0553:c:4/4 z:1/2 - KAN530-1_5	2.82	73.706	9	252	74.374	56.61	0.305	207.824	19827	6.993	0.143	0.686	0.702643
35	SSTR3_KAN530-1_5.tif:0001-0003-0756:c:4/4 z:1/2 - KAN530-1_5	2.243	38.808	0	112	62.713	77.437	0.553	87.052	8305	3.075	0.325	0.793	0.823238				40	ADCY3_KAN530-1_5.tif:0001-0003-0756:c:4/4 z:1/2 - KAN530-1_5	2.243	72.28	20	195	62.713	77.437	0.553	162.133	15468	3.075	0.325	0.793	0.548166
36	SSTR3_KAN530-1_5.tif:0001-0004-0792:c:4/4 z:1/2 - KAN530-1_5	1.572	56.933	0	176	59.137	81.166	0.722	89.515	8540	2.081	0.481	0.845	0.846533				41	ADCY3_KAN530-1_5.tif:0001-0004-0792:c:4/4 z:1/2 - KAN530-1_5	1.572	127.24	17	307	59.137	81.166	0.722	200.057	19086	2.081	0.481	0.845	0.676383
37	SSTR3_KAN530-1_5.tif:0001-0005-0811:c:4/4 z:1/2 - KAN530-1_5	2.767	12.004	0	101	62.445	83.087	0.325	33.217	3169	5.31	0.188	0.668	0.314129				42	ADCY3_KAN530-1_5.tif:0001-0005-0811:c:4/4 z:1/2 - KAN530-1_5	2.767	103.288	11	429	62.445	83.087	0.325	285.819	27268	5.31	0.188	0.668	0.966342
43	SSTR3_KAN530-1_6.tif:0001-0477	3.606	3.538	0	24	71.952	48.848	0.352	12.756	1217	6.054	0.165	0.764	0.120636				45	ADCY3_KAN530-1_6.tif:0001-0477	3.606	46.378	0	266	71.952	48.848	0.352	167.228	15954	6.054	0.165	0.764	0.565389
44	SSTR3_KAN530-1_6.tif:0002-0637	4.958	73.019	0	331	93.138	65.093	0.44	362.022	34538	4.144	0.241	0.77	3.4236				46	ADCY3_KAN530-1_6.tif:0002-0637	4.958	103.812	0	378	93.138	65.093	0.44	514.691	49103	4.144	0.241	0.77	1.74015
47	SSTR3_KAN530-1_7.tif:0001-0313	3.732	63.112	0	339	79.03	32.147	0.565	235.506	22468	3.04	0.329	0.876	2.22715				51	ADCY3_KAN530-1_7.tif:0001-0313	3.732	105.458	0	438	79.03	32.147	0.565	393.52	37543	3.04	0.329	0.876	1.33047
48	SSTR3_KAN530-1_7.tif:0002-0407	4.591	6.701	0	46	87.913	41.716	0.381	30.764	2935	5.609	0.178	0.828	0.290934				52	ADCY3_KAN530-1_7.tif:0002-0407	4.591	59.674	0	209	87.913	41.716	0.381	273.964	26137	5.609	0.178	0.828	0.926261
49	SSTR3_KAN530-1_7.tif:0003-0733	2.998	2.185	0	12	8.425	74.959	0.346	6.551	625	5.984	0.167	0.698	0.0619535				53	ADCY3_KAN530-1_7.tif:0003-0733	2.998	19.143	0	50	8.425	74.959	0.346	57.388	5475	5.984	0.167	0.698	0.194027
50	SSTR3_KAN530-1_7.tif:0004-0761	3.218	12.736	0	67	23.86	77.941	0.546	40.984	3910	3.575	0.28	0.827	0.387581				54	ADCY3_KAN530-1_7.tif:0004-0761	3.218	71.065	0	300	23.86	77.941	0.546	228.683	21817	3.575	0.28	0.827	0.773166
55	SSTR3_KAN530-1_8.tif:0001-0001-0407:c:4/4 z:1/5 - KAN530-1_8	3.658	7.802	0	52	78.038	41.775	0.443	28.542	2723	3.232	0.309	0.723	0.269919				59	ADCY3_KAN530-1_8.tif:0001-0001-0407:c:4/4 z:1/5 - KAN530-1_8	3.658	49.398	0	176	78.038	41.775	0.443	180.707	17240	3.232	0.309	0.723	0.610963
56	SSTR3_KAN530-1_8.tif:0001-0002-0725:c:4/4 z:1/5 - KAN530-1_8	5.44	5.663	0	34	75.601	74.598	0.24	30.806	2939	3.754	0.266	0.47	0.29133				60	ADCY3_KAN530-1_8.tif:0001-0002-0725:c:4/4 z:1/5 - KAN530-1_8	5.44	29.767	0	153	75.601	74.598	0.24	161.934	15449	3.754	0.266	0.47	0.547492
57	SSTR3_KAN530-1_8.tif:0001-0003-0736:c:4/4 z:1/5 - KAN530-1_8	5.933	34.447	0	125	90.42	75.493	0.252	204.365	19497	8.374	0.119	0.688	1.93265				61	ADCY3_KAN530-1_8.tif:0001-0003-0736:c:4/4 z:1/5 - KAN530-1_8	5.933	35.521	0	141	90.42	75.493	0.252	210.738	20105	8.374	0.119	0.688	0.712495
58	SSTR3_KAN530-1_8.tif:0001-0004-0820:c:4/4 z:1/5 - KAN530-1_8	3.008	2.857	0	16	83.447	83.884	0.405	8.595	820	5.013	0.199	0.763	0.081283				62	ADCY3_KAN530-1_8.tif:0001-0004-0820:c:4/4 z:1/5 - KAN530-1_8	3.008	20.247	0	49	83.447	83.884	0.405	60.91	5811	5.013	0.199	0.763	0.205934
63	SSTR3_KAN530-1_9.tif:0001-0223	5.094	45.914	0	310	62.276	22.666	0.551	233.892	22314	3.363	0.297	0.859	2.21189				66	ADCY3_KAN530-1_9.tif:0001-0223	5.094	152.979	0	693	62.276	22.666	0.551	779.305	74348	3.363	0.297	0.859	2.6348
64	SSTR3_KAN530-1_9.tif:0002-0628	5.65	5.672	0	42	96.977	64.447	0.373	32.043	3057	5.605	0.178	0.8	0.303027				67	ADCY3_KAN530-1_9.tif:0002-0628	5.65	69.477	0	290	96.977	64.447	0.373	392.525	37448	5.605	0.178	0.8	1.32711
65	SSTR3_KAN530-1_9.tif:0003-0791	2.862	3.278	0	27	68.339	81.03	0.543	9.381	895	3.597	0.278	0.848	0.0887175				68	ADCY3_KAN530-1_9.tif:0003-0791	2.862	49.802	0	166	68.339	81.03	0.543	142.511	13596	3.597	0.278	0.848	0.481824
										9978.62				0.989137														26105.6				0.925147
69	SSTR3_KAN530-2_1.tif:0001-0199	4.769	58.202	0	258	48.068	20.322	0.513	277.581	26482	3.959	0.253	0.863	2.62505				75	ADCY3_KAN530-2_1.tif:0001-0199	4.769	95.844	0	369	48.068	20.322	0.513	457.103	43609	3.959	0.253	0.863	1.54545
70	SSTR3_KAN530-2_1.tif:0002-0528	4.172	9.779	0	70	73.123	54.108	0.38	40.795	3892	5.717	0.175	0.786	0.385797				76	ADCY3_KAN530-2_1.tif:0002-0528	4.172	34.048	0	151	73.123	54.108	0.38	142.04	13551	5.717	0.175	0.786	0.48023
71	SSTR3_KAN530-2_1.tif:0003-0603	3.69	8.94	0	47	78.792	61.785	0.523	32.986	3147	3.702	0.27	0.84	0.311948				77	ADCY3_KAN530-2_1.tif:0003-0603	3.69	75.824	0	279	78.792	61.785	0.523	279.761	26690	3.702	0.27	0.84	0.945859
72	SSTR3_KAN530-2_1.tif:0004-0720	3.333	5.239	0	43	102.793	73.765	0.433	17.463	1666	5.099	0.196	0.87	0.165143				78	ADCY3_KAN530-2_1.tif:0004-0720	3.333	35.123	0	144	102.793	73.765	0.433	117.072	11169	5.099	0.196	0.87	0.395815
73	SSTR3_KAN530-2_1.tif:0005-0859	2.233	4.582	0	40	70.069	87.957	0.62	10.23	976	3.055	0.327	0.868	0.0967466				79	ADCY3_KAN530-2_1.tif:0005-0859	2.233	42.164	0	165	70.069	87.957	0.62	94.138	8981	3.055	0.327	0.868	0.318275
74	SSTR3_KAN530-2_1.tif:0006-0945	3.585	8.588	0	65	72.008	96.683	0.587	30.785	2937	3.097	0.323	0.855	0.291132				80	ADCY3_KAN530-2_1.tif:0006-0945	3.585	104.36	0	415	72.008	96.683	0.587	374.108	35691	3.097	0.323	0.855	1.26484
81	SSTR3_KAN530-2_10.tif:0001-0043	3.176	4.908	0	37	7.003	4.405	0.498	15.587	1487	4.104	0.244	0.805	0.1474				86	ADCY3_KAN530-2_10.tif:0001-0043	3.176	56.719	0	266	7.003	4.405	0.498	180.141	17186	4.104	0.244	0.805	0.609049
82	SSTR3_KAN530-2_10.tif:0002-0186	5.859	31.014	0	245	65.844	19.021	0.332	181.724	17337	6.738	0.148	0.831	1.71854				87	ADCY3_KAN530-2_10.tif:0002-0186	5.859	50.923	0	218	65.844	19.021	0.332	298.377	28466	6.738	0.148	0.831	1.0088
83	SSTR3_KAN530-2_10.tif:0003-0250	6.331	21.882	0	177	74.576	26.066	0.272	138.539	13217	3.552	0.282	0.538	1.31014				88	ADCY3_KAN530-2_10.tif:0003-0250	6.331	63.538	0	348	74.576	26.066	0.272	402.262	38377	3.552	0.282	0.538	1.36003
84	SSTR3_KAN530-2_10.tif:0004-0559	8.742	35.561	0	181	71.971	57.233	0.399	310.871	29658	5.18	0.193	0.81	2.93987				89	ADCY3_KAN530-2_10.tif:0004-0559	8.742	114.567	0	468	71.971	57.233	0.399	1001.53	95549	5.18	0.193	0.81	3.38613
85	SSTR3_KAN530-2_10.tif:0005-0867	4.685	14.485	0	205	60.833	88.81	0.555	67.87	6475	3.409	0.293	0.882	0.641839				90	ADCY3_KAN530-2_10.tif:0005-0867	4.685	101.955	0	479	60.833	88.81	0.555	477.7	45574	3.409	0.293	0.882	1.61508
91	SSTR3_KAN530-2_11.tif:0001-0138	3.386	181.539	0	897	62.074	14.247	0.596	614.625	58637	3.009	0.332	0.861	5.81243				95	ADCY3_KAN530-2_11.tif:0001-0138	3.386	148.031	0	621	62.074	14.247	0.596	501.18	47814	3.009	0.332	0.861	1.69447
92	SSTR3_KAN530-2_11.tif:0002-0434	3.522	34.583	0	161	73.084	44.336	0.62	121.799	11620	2.942	0.34	0.887	1.15184				96	ADCY3_KAN530-2_11.tif:0002-0434	3.522	88.646	0	313	73.084	44.336	0.62	312.202	29785	2.942	0.34	0.887	1.05554
93	SSTR3_KAN530-2_11.tif:0003-0570	5.304	83.939	0	463	60.158	58.583	0.449	445.196	42473	3.752	0.267	0.738	4.21016				97	ADCY3_KAN530-2_11.tif:0003-0570	5.304	81.836	0	382	60.158	58.583	0.449	434.043	41409	3.752	0.267	0.738	1.46748
94	SSTR3_KAN530-2_11.tif:0004-0771	2.17	2.923	0	14	44.184	79.006	0.607	6.342	605	2.833	0.353	0.883	0.059971				98	ADCY3_KAN530-2_11.tif:0004-0771	2.17	32.787	0	104	44.184	79.006	0.607	71.14	6787	2.833	0.353	0.883	0.240522
99	SSTR3_KAN530-2_12.tif:0001-0192	6.666	11.296	0	124	110.748	19.795	0.383	75.302	7184	5.628	0.178	0.806	0.712119				102	ADCY3_KAN530-2_12.tif:0001-0192	6.666	78.019	0	419	110.748	19.795	0.383	520.11	49620	5.628	0.178	0.806	1.75847
100	SSTR3_KAN530-2_12.tif:0002-0324	2.212	115.351	0	319	41.8	33.195	0.304	255.118	24339	6.315	0.158	0.707	2.41262				103	ADCY3_KAN530-2_12.tif:0002-0324	2.212	14.379	0	51	41.8	33.195	0.304	31.802	3034	6.315	0.158	0.707	0.107521
101	SSTR3_KAN530-2_12.tif:0003-0703	5.901	4.346	0	29	75.832	71.91	0.336	25.649	2447	6.213	0.161	0.763	0.24256				104	ADCY3_KAN530-2_12.tif:0003-0703	5.901	98.792	0	382	75.832	71.91	0.336	583.001	55620	6.213	0.161	0.763	1.9711
105	SSTR3_KAN530-2_2.tif:0001-0462	4.685	3.441	0	25	47.544	47.333	0.435	16.121	1538	4.468	0.224	0.814	0.152455				109	ADCY3_KAN530-2_2.tif:0001-0462	4.685	76.284	0	338	47.544	47.333	0.435	357.421	34099	4.468	0.224	0.814	1.20842
106	SSTR3_KAN530-2_2.tif:0002-0464	3.008	3.794	0	43	65.202	47.626	0.571	11.415	1089	2.503	0.4	0.82	0.107948				110	ADCY3_KAN530-2_2.tif:0002-0464	3.008	104.861	0	475	65.202	47.626	0.571	315.452	30095	2.503	0.4	0.82	1.06653
107	SSTR3_KAN530-2_2.tif:0003-0837	4.036	12.93	0	86	140.185	85.641	0.406	52.179	4978	5.256	0.19	0.765	0.493447				111	ADCY3_KAN530-2_2.tif:0003-0837	4.036	48.031	0	187	140.185	85.641	0.406	193.831	18492	5.256	0.19	0.765	0.655332
108	SSTR3_KAN530-2_2.tif:0004-0836	2.379	3.128	0	24	122.368	85.63	0.766	7.442	710	1.93	0.518	0.897	0.0703792				112	ADCY3_KAN530-2_2.tif:0004-0836	2.379	97.41	0	415	122.368	85.63	0.766	231.775	22112	1.93	0.518	0.897	0.78362
113	SSTR3_KAN530-2_3.tif:0001-0227	2.83	11.567	0	49	62.537	23.313	0.336	32.735	3123	4.623	0.216	0.71	0.309569				116	ADCY3_KAN530-2_3.tif:0001-0227	2.83	19.063	0	58	62.537	23.313	0.336	53.95	5147	4.623	0.216	0.71	0.182403
114	SSTR3_KAN530-2_3.tif:0002-0505	3.637	4.095	0	46	87.842	51.621	0.555	14.895	1421	3.288	0.304	0.84	0.140858				117	ADCY3_KAN530-2_3.tif:0002-0505	3.637	97.882	0	449	87.842	51.621	0.555	356.016	33965	3.288	0.304	0.84	1.20367
115	SSTR3_KAN530-2_3.tif:0003-0580	3.574	8.815	0	85	64.161	59.345	0.603	31.508	3006	3.066	0.326	0.869	0.297972				118	ADCY3_KAN530-2_3.tif:0003-0580	3.574	84.554	0	403	64.161	59.345	0.603	302.223	28833	3.066	0.326	0.869	1.0218
119	SSTR3_KAN530-2_4.tif:0001-0073	1.583	126.397	0	393	60.461	7.337	0.329	200.057	19086	3.341	0.299	0.613	1.89191				122	ADCY3_KAN530-2_4.tif:0001-0073	1.583	14.675	1	46	60.461	7.337	0.329	23.228	2216	3.341	0.299	0.613	0.0785321
120	SSTR3_KAN530-2_4.tif:0002-0559	6.855	89.969	0	510	83.179	57.306	0.359	616.753	58840	5.423	0.184	0.769	5.83255				123	ADCY3_KAN530-2_4.tif:0002-0559	6.855	114.933	0	464	83.179	57.306	0.359	787.879	75166	5.423	0.184	0.769	2.66378
121	SSTR3_KAN530-2_4.tif:0003-0694	4.539	25.984	0	119	86.051	70.903	0.446	117.931	11251	3.493	0.286	0.713	1.11526				124	ADCY3_KAN530-2_4.tif:0003-0694	4.539	53.201	0	230	86.051	70.903	0.446	241.46	23036	3.493	0.286	0.713	0.816366
125	SSTR3_KAN530-2_5.tif:0001-0399	5.702	22.54	0	149	76.117	40.912	0.274	128.529	12262	7.427	0.135	0.751	1.21548				127	ADCY3_KAN530-2_5.tif:0001-0399	5.702	60.879	0	270	76.117	40.912	0.274	347.138	33118	7.427	0.135	0.751	1.17366
126	SSTR3_KAN530-2_5.tif:0002-0806	4.339	23.787	0	102	21.181	82.422	0.378	103.225	9848	5.417	0.185	0.79	0.976189				128	ADCY3_KAN530-2_5.tif:0002-0806	4.339	55.681	0	201	21.181	82.422	0.378	241.628	23052	5.417	0.185	0.79	0.816933
129	SSTR3_KAN530-2_6.tif:0001-0463	4.434	9.248	0	55	47.053	47.343	0.387	41.005	3912	4.772	0.21	0.731	0.38778				132	ADCY3_KAN530-2_6.tif:0001-0463	4.434	70.728	0	348	47.053	47.343	0.387	313.596	29918	4.772	0.21	0.731	1.06025
130	SSTR3_KAN530-2_6.tif:0002-0454	4.151	55.944	0	285	118.011	46.452	0.67	232.215	22154	1.468	0.681	0.851	2.19603				133	ADCY3_KAN530-2_6.tif:0002-0454	4.151	64.598	0	285	118.011	46.452	0.67	268.136	25581	1.468	0.681	0.851	0.906557
131	SSTR3_KAN530-2_6.tif:0003-0555	4.455	38.951	0	183	46.965	56.902	0.499	173.517	16554	3.843	0.26	0.818	1.64093				134	ADCY3_KAN530-2_6.tif:0003-0555	4.455	88.835	0	343	46.965	56.902	0.499	395.743	37755	3.843	0.26	0.818	1.33799
135	SSTR3_KAN530-2_7.tif:0001-0417	6.939	6.618	0	47	61.101	42.929	0.31	45.921	4381	4.285	0.233	0.677	0.434269				137	ADCY3_KAN530-2_7.tif:0001-0417	6.939	50.113	0	237	61.101	42.929	0.31	347.736	33175	4.285	0.233	0.677	1.17568
136	SSTR3_KAN530-2_7.tif:0002-0468	3.585	77.664	0	301	76.87	47.961	0.581	278.409	26561	3.606	0.277	0.936	2.63288				138	ADCY3_KAN530-2_7.tif:0002-0468	3.585	75.906	0	277	76.87	47.961	0.581	272.109	25960	3.606	0.277	0.936	0.919988
139	SSTR3_KAN530-2_8.tif:0001-0377	4.706	53.16	0	273	36.449	38.656	0.499	250.191	23869	3.883	0.258	0.875	2.36603				142	ADCY3_KAN530-2_8.tif:0001-0377	4.706	103.762	0	453	36.449	38.656	0.499	488.339	46589	3.883	0.258	0.875	1.65105
140	SSTR3_KAN530-2_8.tif:0002-0517	2.914	3.147	0	17	60.549	52.787	0.5	9.172	875	2.653	0.377	0.745	0.0867349				143	ADCY3_KAN530-2_8.tif:0002-0517	2.914	52.478	0	199	60.549	52.787	0.5	152.92	14589	2.653	0.377	0.745	0.517015
141	SSTR3_KAN530-2_8.tif:0003-0689	5.398	68.033	0	362	125.639	70.471	0.5	367.253	35037	3.939	0.254	0.823	3.47307				144	ADCY3_KAN530-2_8.tif:0003-0689	5.398	88.847	0	365	125.639	70.471	0.5	479.608	45756	3.939	0.254	0.823	1.62153
145	SSTR3_KAN530-2_9.tif:0001-0322	2.945	4.374	0	34	101.745	32.969	0.364	12.882	1229	6.03	0.166	0.737	0.121825				149	ADCY3_KAN530-2_9.tif:0001-0322	2.945	19.822	0	74	101.745	32.969	0.364	58.384	5570	6.03	0.166	0.737	0.197393
146	SSTR3_KAN530-2_9.tif:0002-0384	2.002	4.696	0	42	117.104	39.307	0.572	9.402	897	3.005	0.333	0.797	0.0889157				150	ADCY3_KAN530-2_9.tif:0002-0384	2.002	42.848	0	199	117.104	39.307	0.572	85.784	8184	3.005	0.333	0.797	0.29003
147	SSTR3_KAN530-2_9.tif:0003-0462	5.01	5.4	0	46	97.599	47.309	0.446	27.054	2581	5.067	0.197	0.91	0.255843				151	ADCY3_KAN530-2_9.tif:0003-0462	5.01	105.14	0	450	97.599	47.309	0.446	526.787	50257	5.067	0.197	0.91	1.78104
148	SSTR3_KAN530-2_9.tif:0004-0600	4.161	43.94	0	225	74.965	61.387	0.461	182.846	17444	4.18	0.239	0.811	1.72915				152	ADCY3_KAN530-2_9.tif:0004-0600	4.161	79.03	0	321	74.965	61.387	0.461	328.868	31375	4.18	0.239	0.811	1.11189
										12791.1				1.26792														32282.6				1.14405
153	SSTR3_KAN530-3_1.tif:0001-0367	3.826	19.907	0	116	78.232	37.623	0.492	76.161	7266	3.833	0.261	0.817	0.720247				155	ADCY3_KAN530-3_1.tif:0001-0367	3.826	94.792	0	347	78.232	37.623	0.492	362.662	34599	3.833	0.261	0.817	1.22614
154	SSTR3_KAN530-3_1.tif:0002-0402	6.708	100.675	0	617	57.381	41.176	0.296	675.367	64432	6.73	0.149	0.722	6.38686				156	ADCY3_KAN530-3_1.tif:0002-0402	6.708	78.948	0	406	57.381	41.176	0.296	529.617	50527	6.73	0.149	0.722	1.79061
157	SSTR3_KAN530-3_10.tif:0001-0279	4.444	31.568	0	179	83.852	28.603	0.425	140.3	13385	4.699	0.213	0.832	1.3268				159	ADCY3_KAN530-3_10.tif:0001-0279	4.444	91.472	0	335	83.852	28.603	0.425	406.528	38784	4.699	0.213	0.832	1.37445
158	SSTR3_KAN530-3_10.tif:0002-0804	2.495	5.487	0	30	101.14	82.313	0.631	13.689	1306	3.026	0.33	0.9	0.129458				160	ADCY3_KAN530-3_10.tif:0002-0804	2.495	50.508	0	226	101.14	82.313	0.631	126.002	12021	3.026	0.33	0.9	0.426008
161	SSTR3_KAN530-3_11.tif:0001-0386	4.046	8.168	0	124	83.841	39.402	0.537	33.049	3153	2.664	0.375	0.798	0.312543				163	ADCY3_KAN530-3_11.tif:0001-0386	4.046	79.093	0	360	83.841	39.402	0.537	320.011	30530	2.664	0.375	0.798	1.08194
162	SSTR3_KAN530-3_11.tif:0002-0495	3.648	5.399	0	46	84.009	50.698	0.501	19.695	1879	4.227	0.237	0.898	0.186257				164	ADCY3_KAN530-3_11.tif:0002-0495	3.648	79.02	0	332	84.009	50.698	0.501	288.241	27499	4.227	0.237	0.898	0.974528
165	SSTR3_KAN530-3_12.tif:0001-0307	2.243	4.178	0	26	50.031	31.485	0.695	9.371	894	2.58	0.388	0.897	0.0886183				169	ADCY3_KAN530-3_12.tif:0001-0307	2.243	58.893	0	218	50.031	31.485	0.695	132.103	12603	2.58	0.388	0.897	0.446634
166	SSTR3_KAN530-3_12.tif:0002-0361	5.063	10.091	0	98	106.115	37.07	0.482	51.089	4874	4.278	0.234	0.877	0.483138				170	ADCY3_KAN530-3_12.tif:0002-0361	5.063	71.915	0	341	106.115	37.07	0.482	364.087	34735	4.278	0.234	0.877	1.23096
167	SSTR3_KAN530-3_12.tif:0003-0570	2.935	6.664	0	67	26.531	58.387	0.46	19.559	1866	4.478	0.223	0.819	0.184968				171	ADCY3_KAN530-3_12.tif:0003-0570	2.935	43.982	0	154	26.531	58.387	0.46	129.084	12315	4.478	0.223	0.819	0.436427
168	SSTR3_KAN530-3_12.tif:0004-0844	7.411	17.863	0	129	62.045	87.01	0.309	132.375	12629	3.851	0.26	0.561	1.25186				172	ADCY3_KAN530-3_12.tif:0004-0844	7.411	67.945	0	372	62.045	87.01	0.309	503.517	48037	3.851	0.26	0.561	1.70237
173	SSTR3_KAN530-3_2.tif:0001-0276	2.505	5.063	0	24	49.132	28.358	0.516	12.683	1210	3.242	0.308	0.826	0.119942				176	ADCY3_KAN530-3_2.tif:0001-0276	2.505	18.812	0	45	49.132	28.358	0.516	47.126	4496	3.242	0.308	0.826	0.159332
174	SSTR3_KAN530-3_2.tif:0002-0457	6.142	3.268	0	18	73.401	46.763	0.264	20.073	1915	3.72	0.269	0.533	0.189826				177	ADCY3_KAN530-3_2.tif:0002-0457	6.142	44.582	0	166	73.401	46.763	0.264	273.839	26125	3.72	0.269	0.533	0.925836
175	SSTR3_KAN530-3_2.tif:0003-0531	3.166	11.603	0	56	86.473	54.462	0.625	36.728	3504	2.529	0.395	0.86	0.347336				178	ADCY3_KAN530-3_2.tif:0003-0531	3.166	109.079	0	539	86.473	54.462	0.625	345.293	32942	2.529	0.395	0.86	1.16742
179	SSTR3_KAN530-3_3.tif:0001-0349	2.862	22.15	0	113	80.01	35.767	0.572	63.384	6047	3.342	0.299	0.869	0.599413				183	ADCY3_KAN530-3_3.tif:0001-0349	2.862	59.733	0	200	80.01	35.767	0.572	170.928	16307	3.342	0.299	0.869	0.577899
180	SSTR3_KAN530-3_3.tif:0002-0458	4.968	7.194	0	57	79.303	46.508	0.325	35.743	3410	3.993	0.25	0.604	0.338018				184	ADCY3_KAN530-3_3.tif:0002-0458	4.968	39.527	0	330	79.303	46.508	0.325	196.388	18736	3.993	0.25	0.604	0.663979
181	SSTR3_KAN530-3_3.tif:0003-0487	3.595	3.557	0	25	61.829	50.005	0.532	12.788	1220	3.33	0.3	0.813	0.120933				185	ADCY3_KAN530-3_3.tif:0003-0487	3.595	88.851	0	399	61.829	50.005	0.532	319.445	30476	3.33	0.3	0.813	1.08003
182	SSTR3_KAN530-3_3.tif:0004-0654	5.859	49.909	0	305	89.126	66.973	0.417	292.433	27899	4.713	0.212	0.79	2.76551				186	ADCY3_KAN530-3_3.tif:0004-0654	5.859	95.122	0	425	89.126	66.973	0.417	557.352	53173	4.713	0.212	0.79	1.88438
187	SSTR3_KAN530-3_4.tif:0001-0389	2.725	3.673	0	27	49.891	39.906	0.38	10.01	955	4.137	0.242	0.741	0.094665				189	ADCY3_KAN530-3_4.tif:0001-0389	2.725	36.988	0	138	49.891	39.906	0.38	100.804	9617	4.137	0.242	0.741	0.340814
188	SSTR3_KAN530-3_4.tif:0002-0859	6.457	4.131	0	37	79.4	87.563	0.237	26.676	2545	2.425	0.412	0.429	0.252275				190	ADCY3_KAN530-3_4.tif:0002-0859	6.457	40.071	0	144	79.4	87.563	0.237	258.734	24684	2.425	0.412	0.429	0.874769
191	SSTR3_KAN530-3_5.tif:0001-0243	3.889	10.278	0	70	68.815	24.579	0.476	39.967	3813	2.206	0.453	0.695	0.377966				193	ADCY3_KAN530-3_5.tif:0001-0243	3.889	84.704	0	311	68.815	24.579	0.476	329.392	31425	2.206	0.453	0.695	1.11366
192	SSTR3_KAN530-3_5.tif:0002-0787	3.564	45.021	0	204	83.73	80.596	0.5	160.446	15307	3.876	0.258	0.863	1.51732				194	ADCY3_KAN530-3_5.tif:0002-0787	3.564	87.121	0	310	83.73	80.596	0.5	310.483	29621	3.876	0.258	0.863	1.04973
195	SSTR3_KAN530-3_6.tif:0001-0078	3.092	14.42	0	198	67.785	7.78	0.342	44.59	4254	4.749	0.211	0.678	0.42168				199	ADCY3_KAN530-3_6.tif:0001-0078	3.092	45.41	0	237	67.785	7.78	0.342	140.415	13396	4.749	0.211	0.678	0.474737
196	SSTR3_KAN530-3_6.tif:0002-0188	4.926	21.462	0	141	59.442	19.043	0.485	105.731	10087	3.534	0.283	0.769	0.99988				200	ADCY3_KAN530-3_6.tif:0002-0188	4.926	117.894	0	536	59.442	19.043	0.485	580.8	55410	3.534	0.283	0.769	1.96366
197	SSTR3_KAN530-3_6.tif:0003-0304	2.306	5.114	0	38	52.495	30.997	0.478	11.792	1125	3.712	0.269	0.757	0.111516				201	ADCY3_KAN530-3_6.tif:0003-0304	2.306	26.432	0	80	52.495	30.997	0.478	60.952	5815	3.712	0.269	0.757	0.206076
198	SSTR3_KAN530-3_6.tif:0004-0808	3.543	32.568	0	208	108.584	82.58	0.561	115.384	11008	3.129	0.32	0.813	1.09118				202	ADCY3_KAN530-3_6.tif:0004-0808	3.543	108.607	0	474	108.584	82.58	0.561	384.779	36709	3.129	0.32	0.813	1.30092
203	SSTR3_KAN530-3_7.tif:0001-0139	2.966	4.074	0	29	127.769	14.329	0.45	12.086	1153	2.885	0.347	0.683	0.114292				206	ADCY3_KAN530-3_7.tif:0001-0139	2.966	26.244	0	81	127.769	14.329	0.45	77.849	7427	2.885	0.347	0.683	0.263203
204	SSTR3_KAN530-3_7.tif:0002-0555	7.149	64.622	0	363	82.802	57.194	0.356	461.956	44072	5.117	0.195	0.688	4.36867				207	ADCY3_KAN530-3_7.tif:0002-0555	7.149	99.635	0	598	82.802	57.194	0.356	712.253	67951	5.117	0.195	0.688	2.40809
205	SSTR3_KAN530-3_7.tif:0003-0865	2.809	8.504	0	51	86.811	88.616	0.645	23.888	2279	2.444	0.409	0.862	0.225907				208	ADCY3_KAN530-3_7.tif:0003-0865	2.809	129.25	0	601	86.811	88.616	0.645	363.081	34639	2.444	0.409	0.862	1.22756
209	SSTR3_KAN530-3_8.tif:0001-0286	3.27	30.939	0	208	127.645	29.307	0.394	101.181	9653	4.756	0.21	0.721	0.95686				214	ADCY3_KAN530-3_8.tif:0001-0286	3.27	48.929	0	193	127.645	29.307	0.394	160.016	15266	4.756	0.21	0.721	0.541007
210	SSTR3_KAN530-3_8.tif:0002-0499	2.715	8.027	0	88	44.435	50.998	0.28	21.792	2079	7.75	0.129	0.675	0.206082				215	ADCY3_KAN530-3_8.tif:0002-0499	2.715	17.378	0	54	44.435	50.998	0.28	47.179	4501	7.75	0.129	0.675	0.15951
211	SSTR3_KAN530-3_8.tif:0003-0542	5	9.138	0	97	27.216	55.546	0.378	45.69	4359	5.325	0.188	0.763	0.432089				216	ADCY3_KAN530-3_8.tif:0003-0542	5	70.992	0	281	27.216	55.546	0.378	354.947	33863	5.325	0.188	0.763	1.20006
212	SSTR3_KAN530-3_8.tif:0004-0542	3.711	4.251	0	26	48.201	55.576	0.438	15.775	1505	4.164	0.24	0.798	0.149184				217	ADCY3_KAN530-3_8.tif:0004-0542	3.711	60.39	0	198	48.201	55.576	0.438	224.081	21378	4.164	0.24	0.798	0.757608
213	SSTR3_KAN530-3_8.tif:0005-0671	4.455	4.209	0	44	20.667	68.6	0.519	18.752	1789	3.242	0.308	0.795	0.177336				218	ADCY3_KAN530-3_8.tif:0005-0671	4.455	80.847	0	388	20.667	68.6	0.519	360.157	34360	3.242	0.308	0.795	1.21767
219	SSTR3_KAN530-3_9.tif:0001-0119	3.008	6.275	0	55	50.209	12.232	0.466	18.878	1801	4.39	0.228	0.815	0.178525				226	ADCY3_KAN530-3_9.tif:0001-0119	3.008	32.47	0	126	50.209	12.232	0.466	97.68	9319	4.39	0.228	0.815	0.330253
220	SSTR3_KAN530-3_9.tif:0002-0250	4.612	6.634	0	50	41.341	25.444	0.434	30.597	2919	4.502	0.222	0.798	0.289348				227	ADCY3_KAN530-3_9.tif:0002-0250	4.612	62.155	0	284	41.341	25.444	0.434	286.658	27348	4.502	0.222	0.798	0.969177
221	SSTR3_KAN530-3_9.tif:0003-0345	4.947	4.665	0	52	60.885	35.309	0.536	23.081	2202	3.765	0.266	0.848	0.218275				228	ADCY3_KAN530-3_9.tif:0003-0345	4.947	91.669	0	442	60.885	35.309	0.536	453.529	43268	3.765	0.266	0.848	1.53336
222	SSTR3_KAN530-3_9.tif:0004-0419	3.826	4.748	0	30	50.415	42.871	0.54	18.165	1733	3.558	0.281	0.863	0.171785				229	ADCY3_KAN530-3_9.tif:0004-0419	3.826	84.088	0	317	50.415	42.871	0.54	321.709	30692	3.558	0.281	0.863	1.08768
223	SSTR3_KAN530-3_9.tif:0005-0491	5.859	6.127	0	66	74.733	50.088	0.336	35.9	3425	4.667	0.214	0.668	0.339505				230	ADCY3_KAN530-3_9.tif:0005-0491	5.859	65.657	0	289	74.733	50.088	0.336	384.705	36702	4.667	0.214	0.668	1.30067
224	SSTR3_KAN530-3_9.tif:0006-0544	1.667	3.157	0	15	44.765	55.707	0.745	5.262	502	2.217	0.451	0.906	0.0497611				231	ADCY3_KAN530-3_9.tif:0006-0544	1.667	26.73	0	92	44.765	55.707	0.745	44.548	4250	2.217	0.451	0.906	0.150614
225	SSTR3_KAN530-3_9.tif:0007-0758	4.685	18.523	0	116	80.326	77.361	0.439	86.79	8280	3.833	0.261	0.747	0.82076				232	ADCY3_KAN530-3_9.tif:0007-0758	4.685	92.107	0	491	80.326	77.361	0.439	431.559	41172	3.833	0.261	0.747	1.45908
										7343.35				0.727914														26728.2				0.947211
										10088.2																		28217.8
233	SSTR3_KAN530-4_1.tif:0001-0347	4.727	4.947	0	45	31.931	35.633	0.384	23.385	2231	4.321	0.231	0.757	0.221149				236	ADCY3_KAN530-4_1.tif:0001-0347	4.727	45.486	0	150	31.931	35.633	0.384	215.025	20514	4.321	0.231	0.757	0.726989
234	SSTR3_KAN530-4_1.tif:0002-0560	2.631	7.012	0	40	86.868	57.457	0.45	18.448	1760	3.928	0.255	0.786	0.174461				237	ADCY3_KAN530-4_1.tif:0002-0560	2.631	18.777	0	50	86.868	57.457	0.45	49.401	4713	3.928	0.255	0.786	0.167023
235	SSTR3_KAN530-4_1.tif:0003-0666	8.082	31.062	0	226	98.788	68.367	0.306	251.03	23949	7.021	0.142	0.73	2.37396				238	ADCY3_KAN530-4_1.tif:0003-0666	8.082	67.31	0	291	98.788	68.367	0.306	543.967	51896	7.021	0.142	0.73	1.83913
239	SSTR3_KAN530-4_10.tif:0001-0335	4.046	150.166	0	643	85.87	34.373	0.446	607.57	57964	2.184	0.458	0.7	5.74572				241	ADCY3_KAN530-4_10.tif:0001-0335	4.046	95.85	0	402	85.87	34.373	0.446	387.808	36998	2.184	0.458	0.7	1.31116
240	SSTR3_KAN530-4_10.tif:0002-0771	2.799	3.888	0	47	54.494	78.913	0.681	10.88	1038	2.239	0.447	0.854	0.102892				242	ADCY3_KAN530-4_10.tif:0002-0771	2.799	85.438	0	322	54.494	78.913	0.681	239.112	22812	2.239	0.447	0.854	0.808427
243	SSTR3_KAN530-4_11.tif:0001-0218	4.056	63.566	0	315	65.675	22.268	0.532	257.854	24600	3.563	0.281	0.84	2.43849				247	ADCY3_KAN530-4_11.tif:0001-0218	4.056	61.284	0	247	65.675	22.268	0.532	248.598	23717	3.563	0.281	0.84	0.840499
244	SSTR3_KAN530-4_11.tif:0002-0273	4.015	8.018	0	123	40.183	27.636	0.365	32.19	3071	3.361	0.298	0.612	0.304415				248	ADCY3_KAN530-4_11.tif:0002-0273	4.015	39.339	0	167	40.183	27.636	0.365	157.93	15067	3.361	0.298	0.612	0.533955
245	SSTR3_KAN530-4_11.tif:0003-0415	4.801	7.138	0	64	36.177	42.384	0.344	34.265	3269	5.698	0.176	0.691	0.324042				249	ADCY3_KAN530-4_11.tif:0003-0415	4.801	48.965	0	213	36.177	42.384	0.344	235.066	22426	5.698	0.176	0.691	0.794748
246	SSTR3_KAN530-4_11.tif:0004-0632	3.344	3.411	0	27	120.437	64.745	0.471	11.404	1088	3.865	0.259	0.744	0.107849				250	ADCY3_KAN530-4_11.tif:0004-0632	3.344	48.091	0	225	120.437	64.745	0.471	160.802	15341	3.865	0.259	0.744	0.543665
251	SSTR3_KAN530-4_12.tif:0001-0281	4.434	19.991	0	101	83.685	28.751	0.421	88.635	8456	4.706	0.212	0.803	0.838206				257	ADCY3_KAN530-4_12.tif:0001-0281	4.434	55.142	0	199	83.685	28.751	0.421	244.489	23325	4.706	0.212	0.803	0.826607
252	SSTR3_KAN530-4_12.tif:0002-0424	3.008	11.108	0	84	109.311	43.416	0.625	33.416	3188	2.427	0.412	0.844	0.316013				258	ADCY3_KAN530-4_12.tif:0002-0424	3.008	62.432	0	350	109.311	43.416	0.625	187.814	17918	2.427	0.412	0.844	0.63499
253	SSTR3_KAN530-4_12.tif:0003-0513	4.581	8.973	0	50	60.664	52.432	0.523	41.099	3921	3.513	0.285	0.833	0.388672				259	ADCY3_KAN530-4_12.tif:0003-0513	4.581	51.32	0	241	60.664	52.432	0.523	235.077	22427	3.513	0.285	0.833	0.794783
254	SSTR3_KAN530-4_12.tif:0004-0538	2.516	46.133	0	286	47.05	55.134	0.73	116.055	11072	2.234	0.448	0.892	1.09752				260	ADCY3_KAN530-4_12.tif:0004-0538	2.516	72.617	0	257	47.05	55.134	0.73	182.678	17428	2.234	0.448	0.892	0.617625
255	SSTR3_KAN530-4_12.tif:0005-0565	1.887	5.978	0	37	116.101	57.897	0.583	11.278	1076	2.892	0.346	0.822	0.106659				261	ADCY3_KAN530-4_12.tif:0005-0565	1.887	23.306	0	60	116.101	57.897	0.583	43.971	4195	2.892	0.346	0.822	0.148665
256	SSTR3_KAN530-4_12.tif:0006-0809	1.384	3.136	0	13	5.358	82.783	0.456	4.339	414	3.712	0.269	0.759	0.041038				262	ADCY3_KAN530-4_12.tif:0006-0809	1.384	16.841	0	50	5.358	82.783	0.456	23.301	2223	3.712	0.269	0.759	0.0787802
263	SSTR3_KAN530-4_2.tif:0001-0284	1.992	5.4	0	29	124.484	28.858	0.316	10.754	1026	5.501	0.182	0.702	0.101703				268	ADCY3_KAN530-4_2.tif:0001-0284	1.992	18.6	0	47	124.484	28.858	0.316	37.043	3534	5.501	0.182	0.702	0.12524
264	SSTR3_KAN530-4_2.tif:0002-0327	4.098	153.412	0	803	116.611	33.566	0.581	628.744	59984	2.644	0.378	0.828	5.94595				269	ADCY3_KAN530-4_2.tif:0002-0327	4.098	124.721	0	484	116.611	33.566	0.581	511.158	48766	2.644	0.378	0.828	1.7282
265	SSTR3_KAN530-4_2.tif:0003-0614	2.065	5.503	0	31	79.734	62.882	0.496	11.362	1084	3.202	0.312	0.845	0.107452				270	ADCY3_KAN530-4_2.tif:0003-0614	2.065	18.604	0	46	79.734	62.882	0.496	38.416	3665	3.202	0.312	0.845	0.129883
266	SSTR3_KAN530-4_2.tif:0004-0636	3.469	7.353	0	54	70.213	65.185	0.632	25.513	2434	2.709	0.369	0.852	0.241272				271	ADCY3_KAN530-4_2.tif:0004-0636	3.469	111.29	0	431	70.213	65.185	0.632	386.12	36837	2.709	0.369	0.852	1.30545
267	SSTR3_KAN530-4_2.tif:0005-0795	2.893	9.243	0	87	72.933	81.427	0.615	26.739	2551	3.025	0.331	0.88	0.25287				272	ADCY3_KAN530-4_2.tif:0005-0795	2.893	80.322	0	309	72.933	81.427	0.615	232.372	22169	3.025	0.331	0.88	0.78564
273	SSTR3_KAN530-4_3.tif:0001-0080	3.669	152	0	553	62.084	8.188	0.581	557.635	53200	2.895	0.345	0.851	5.27348				276	ADCY3_KAN530-4_3.tif:0001-0080	3.669	107.537	0	413	62.084	8.188	0.581	394.516	37638	2.895	0.345	0.851	1.33384
274	SSTR3_KAN530-4_3.tif:0002-0516	2.757	3.403	0	27	30.697	52.855	0.676	9.381	895	2.097	0.477	0.84	0.0887175				277	ADCY3_KAN530-4_3.tif:0002-0516	2.757	83.038	0	326	30.697	52.855	0.676	228.913	21839	2.097	0.477	0.84	0.773945
275	SSTR3_KAN530-4_3.tif:0003-0858	3.532	55.371	0	336	119.696	87.899	0.573	195.591	18660	2.697	0.371	0.812	1.84968				278	ADCY3_KAN530-4_3.tif:0003-0858	3.532	54.03	0	267	119.696	87.899	0.573	190.854	18208	2.697	0.371	0.812	0.645268
279	SSTR3_KAN530-4_4.tif:0001-0173	4.916	54.337	0	404	76.983	17.699	0.552	267.12	25484	3.307	0.302	0.829	2.52612				285	ADCY3_KAN530-4_4.tif:0001-0173	4.916	95.846	0	493	76.983	17.699	0.552	471.181	44952	3.307	0.302	0.829	1.59304
280	SSTR3_KAN530-4_4.tif:0002-0454	4.958	7.45	0	76	114.182	46.55	0.412	36.938	3524	4.764	0.21	0.77	0.349319				286	ADCY3_KAN530-4_4.tif:0002-0454	4.958	58.307	0	229	114.182	46.55	0.412	289.079	27579	4.764	0.21	0.77	0.977364
281	SSTR3_KAN530-4_4.tif:0003-0560	4.119	59.252	0	377	15.645	57.453	0.392	244.081	23286	5.002	0.2	0.753	2.30824				287	ADCY3_KAN530-4_4.tif:0003-0560	4.119	45.774	0	229	15.645	57.453	0.392	188.558	17989	5.002	0.2	0.753	0.637507
282	SSTR3_KAN530-4_4.tif:0004-0640	7.526	3.618	0	31	106.878	65.357	0.304	27.232	2598	2.027	0.493	0.555	0.257528				288	ADCY3_KAN530-4_4.tif:0004-0640	7.526	67.028	0	292	106.878	65.357	0.304	504.45	48126	2.027	0.493	0.555	1.70552
283	SSTR3_KAN530-4_4.tif:0005-0684	1.939	8.908	0	66	53.87	70.114	0.768	17.274	1648	2.205	0.454	0.875	0.163359				289	ADCY3_KAN530-4_4.tif:0005-0684	1.939	53.314	0	171	53.87	70.114	0.768	103.383	9863	2.205	0.454	0.875	0.349532
284	SSTR3_KAN530-4_4.tif:0006-0924	4.182	3.907	0	23	94.338	94.675	0.487	16.341	1559	4.433	0.226	0.903	0.154537				290	ADCY3_KAN530-4_4.tif:0006-0924	4.182	48.251	0	270	94.338	94.675	0.487	201.797	19252	4.433	0.226	0.903	0.682266
291	SSTR3_KAN530-4_5.tif:0001-0223	4.423	15.164	0	141	56.233	22.748	0.514	67.073	6399	3.527	0.284	0.833	0.634305				295	ADCY3_KAN530-4_5.tif:0001-0223	4.423	79.848	0	371	56.233	22.748	0.514	353.197	33696	3.527	0.284	0.833	1.19414
292	SSTR3_KAN530-4_5.tif:0002-0410	5.031	16.854	0	95	48.63	42.075	0.403	84.798	8090	4.04	0.248	0.738	0.801926				296	ADCY3_KAN530-4_5.tif:0002-0410	5.031	54.198	0	189	48.63	42.075	0.403	272.686	26015	4.04	0.248	0.738	0.921937
293	SSTR3_KAN530-4_5.tif:0003-0550	4.182	11.328	0	99	113.523	56.356	0.467	47.378	4520	4.07	0.246	0.813	0.448048				297	ADCY3_KAN530-4_5.tif:0003-0550	4.182	45.148	0	181	113.523	56.356	0.467	188.82	18014	4.07	0.246	0.813	0.638393
294	SSTR3_KAN530-4_5.tif:0004-0885	3.186	13.582	0	91	101.072	90.658	0.558	43.28	4129	3.331	0.3	0.852	0.40929				298	ADCY3_KAN530-4_5.tif:0004-0885	3.186	45.658	0	197	101.072	90.658	0.558	145.488	13880	3.331	0.3	0.852	0.491889
299	SSTR3_KAN530-4_6.tif:0001-0397	5.136	12.006	0	118	60.031	40.818	0.475	61.665	5883	2.737	0.365	0.702	0.583156				301	ADCY3_KAN530-4_6.tif:0001-0397	5.136	57.971	0	332	60.031	40.818	0.475	297.748	28406	2.737	0.365	0.702	1.00667
300	SSTR3_KAN530-4_6.tif:0002-0525	7.369	10.395	0	103	99.528	53.778	0.286	76.601	7308	4.467	0.224	0.593	0.72441				302	ADCY3_KAN530-4_6.tif:0002-0525	7.369	55.292	0	244	99.528	53.778	0.286	407.43	38870	4.467	0.224	0.593	1.3775
303	SSTR3_KAN530-4_7.tif:0001-0147	4.161	3.756	0	25	111.838	15.255	0.35	15.628	1491	5.296	0.189	0.686	0.147796				307	ADCY3_KAN530-4_7.tif:0001-0147	4.161	40.494	0	157	111.838	15.255	0.35	168.506	16076	5.296	0.189	0.686	0.569712
304	SSTR3_KAN530-4_7.tif:0002-0365	2.306	10.141	0	100	18.84	37.381	0.526	23.385	2231	3.731	0.268	0.829	0.221149				308	ADCY3_KAN530-4_7.tif:0002-0365	2.306	35.809	0	156	18.84	37.381	0.526	82.576	7878	3.731	0.268	0.829	0.279186
305	SSTR3_KAN530-4_7.tif:0003-0476	2.421	11.641	0	53	50.572	48.734	0.599	28.186	2689	2.998	0.334	0.859	0.266549				309	ADCY3_KAN530-4_7.tif:0003-0476	2.421	33.29	0	112	50.572	48.734	0.599	80.605	7690	2.998	0.334	0.859	0.272524
306	SSTR3_KAN530-4_7.tif:0004-0708	4.109	30.867	0	135	114.793	72.419	0.49	126.83	12100	3.889	0.257	0.815	1.19942				310	ADCY3_KAN530-4_7.tif:0004-0708	4.109	85.515	0	350	114.793	72.419	0.49	351.373	33522	3.889	0.257	0.815	1.18798
311	SSTR3_KAN530-4_8.tif:0001-0220	4.224	11.72	0	84	23.282	22.582	0.632	49.506	4723	1.698	0.589	0.823	0.46817				315	ADCY3_KAN530-4_8.tif:0001-0220	4.224	67.68	0	262	23.282	22.582	0.632	285.893	27275	1.698	0.589	0.823	0.96659
312	SSTR3_KAN530-4_8.tif:0002-0384	3.354	5.366	0	69	92.096	39.129	0.611	17.997	1717	1.904	0.525	0.816	0.170199				316	ADCY3_KAN530-4_8.tif:0002-0384	3.354	84.759	0	336	92.096	39.129	0.611	284.299	27123	1.904	0.525	0.816	0.961203
313	SSTR3_KAN530-4_8.tif:0003-0727	3.333	64.189	0	221	97.665	74.512	0.607	213.956	20412	3.003	0.333	0.855	2.02335				317	ADCY3_KAN530-4_8.tif:0003-0727	3.333	54.236	0	191	97.665	74.512	0.607	180.781	17247	3.003	0.333	0.855	0.611211
314	SSTR3_KAN530-4_8.tif:0004-0781	2.296	8.11	0	37	84.326	80.021	0.53	18.616	1776	3.59	0.279	0.784	0.176047				318	ADCY3_KAN530-4_8.tif:0004-0781	2.296	34.868	0	114	84.326	80.021	0.53	80.039	7636	3.59	0.279	0.784	0.27061
319	SSTR3_KAN530-4_9.tif:0001-0434	4.182	3.419	0	41	37.349	44.195	0.28	14.297	1364	7.265	0.138	0.669	0.135207				321	ADCY3_KAN530-4_9.tif:0001-0434	4.182	30.08	0	155	37.349	44.195	0.28	125.803	12002	7.265	0.138	0.669	0.425335
320	SSTR3_KAN530-4_9.tif:0002-0666	4.245	8.151	0	71	82.844	68.099	0.412	34.601	3301	4.702	0.213	0.764	0.327214				322	ADCY3_KAN530-4_9.tif:0002-0666	4.245	47.212	0	214	82.844	68.099	0.412	200.424	19121	4.702	0.213	0.764	0.677623
										9625.84				0.954168														21798.3				0.772502

## Sheet: IF condition
Exp. number	Cell line	Gene induced	Culture condition, fixation condition	Goat-Alexa488	Rabbit-Alexa568	Mouse Alexa647	Nuclear stain	Date	Replicate
Exp. 1
KAN522-1	NCS1 primary neuron #6 (WT)	DIV7	Fixed in 4% PFA at RT for 15 minutes.	SSTR3 (M-18), sc-11617, Santa Cruz, 1:1000	ADCY3, C-20, sc-588 Santa Cruz, 1:1000	FGFR1OP,H00011116-M01, 1:1000	DAPI	2019-09-05
KAN522-2	NCS1 primary neuron #10 (KO)	DIV7	Fixed in 4% PFA at RT for 15 minutes.	SSTR3 (M-18), sc-11617, Santa Cruz, 1:1000	ADCY3, C-20, sc-588 Santa Cruz, 1:1000	FGFR1OP,H00011116-M01, 1:1000	DAPI	2019-09-05
KAN522-3	NCS1 primary neuron #21 (KO)	DIV7	Fixed in 4% PFA at RT for 15 minutes.	SSTR3 (M-18), sc-11617, Santa Cruz, 1:1000	ADCY3, C-20, sc-588 Santa Cruz, 1:1000	FGFR1OP,H00011116-M01, 1:1000	DAPI	2019-09-05
KAN522-4	NCS1 primary neuron #22 (WT)	DIV7	Fixed in 4% PFA at RT for 15 minutes.	SSTR3 (M-18), sc-11617, Santa Cruz, 1:1000	ADCY3, C-20, sc-588 Santa Cruz, 1:1000	FGFR1OP,H00011116-M01, 1:1000	DAPI	2019-09-05
KAN522-6	NCS1 primary neuron #24 (KO)	DIV7	Fixed in 4% PFA at RT for 15 minutes.	SSTR3 (M-18), sc-11617, Santa Cruz, 1:1000	ADCY3, C-20, sc-588 Santa Cruz, 1:1000	FGFR1OP,H00011116-M01, 1:1000	DAPI	2019-09-05
KAN522-7	NCS1 primary neuron #26 (KO)	DIV7	Fixed in 4% PFA at RT for 15 minutes.	SSTR3 (M-18), sc-11617, Santa Cruz, 1:1000	ADCY3, C-20, sc-588 Santa Cruz, 1:1000	FGFR1OP,H00011116-M01, 1:1000	DAPI	2019-09-05
Exp. 2
KAN530-1	NCS1 primary neuron #12 (WT)	DIV7	Fixed in 4% PFA at RT for 15 minutes.	SSTR3 (M-18), sc-11617, Santa Cruz, 1:250	ADCY3, C-20, sc-588 Santa Cruz, 1:500	MAP-2, sc-74421, Santa Cruz, 1:500, IgG1	DAPI	2019-10-10
KAN530-2	NCS1 primary neuron #14 (WT)	DIV7	Fixed in 4% PFA at RT for 15 minutes.	SSTR3 (M-18), sc-11617, Santa Cruz, 1:250	ADCY3, C-20, sc-588 Santa Cruz, 1:500	MAP-2, sc-74421, Santa Cruz, 1:500, IgG1	DAPI	2019-10-10
KAN530-3	NCS1 primary neuron #34 (WT)	DIV7	Fixed in 4% PFA at RT for 15 minutes.	SSTR3 (M-18), sc-11617, Santa Cruz, 1:250	ADCY3, C-20, sc-588 Santa Cruz, 1:500	MAP-2, sc-74421, Santa Cruz, 1:500, IgG1	DAPI	2019-10-10
KAN530-4	NCS1 primary neuron #36 (KO)	DIV7	Fixed in 4% PFA at RT for 15 minutes.	SSTR3 (M-18), sc-11617, Santa Cruz, 1:250	ADCY3, C-20, sc-588 Santa Cruz, 1:500	MAP-2, sc-74421, Santa Cruz, 1:500, IgG1	DAPI	2019-10-10

## Sheet: Statistics (SSTR3)
Table Analyzed	Identify outliers of SSTR3_KAN522_KAN530:Cleaned data
Column B	NCS1KO (SSTR3)
vs.	vs.
Column A	NCS1 WT (SSTR3)
Nested t test
P value	0.1277
P value summary	ns
Significantly different (P < 0.05)?	No
One- or two-tailed P value?	Two-tailed
t, df	t=1.699, df=8
F, DFn, Dfd	2.888, 1, 8
How big is the difference?
Mean of column B	0.3098
Mean of column A	0.5655
Difference between means (B - A) ± SEM	-0.2557 ± 0.1505
95% confidence interval	-0.6027 to 0.09127
Random effects	SD	Variance
Variation within subcolumns	0.544	0.2959
Variation among subcolumn means	0.218	0.04752
Do the subcolumns differ (within each column)?
Chi-square, df	27.65, 1
P value	<0.0001
P value summary	****
Is there significant difference between subcolumns (P < 0.05)?	Yes
Data analyzed
Number of treatments (columns)	2
Number of subjects (subcolumns)	10
Total number of values	330

## Sheet: Statistics (ACIII)
Table Analyzed	Identify outliers of ACIII_KAN522_KAN530:Cleaned data
Column B	NCS1KO (ACIII)
vs.	vs.
Column A	NCS1 WT (ACIII)
Nested t test
P value	0.0023
P value summary	**
Significantly different (P < 0.05)?	Yes
One- or two-tailed P value?	Two-tailed
t, df	t=4.411, df=8
F, DFn, Dfd	19.46, 1, 8
How big is the difference?
Mean of column B	0.7385
Mean of column A	0.9991
Difference between means (B - A) ± SEM	-0.2606 ± 0.05908
95% confidence interval	-0.3968 to -0.1244
Random effects	SD	Variance
Variation within subcolumns	0.4886	0.2387
Variation among subcolumn means	0.05006	0.002506
Do the subcolumns differ (within each column)?
Chi-square, df	0.4633, 1
P value	0.4961
P value summary	ns
Is there significant difference between subcolumns (P < 0.05)?	No
Data analyzed
Number of treatments (columns)	2
Number of subjects (subcolumns)	10
Total number of values	386
