# Supplementary material for: Myristoylated Neuronal Calcium Sensor-1 captures the preciliary vesicle at distal appendages
Source: eLife. 2025 Jan 30;14:e85998. doi: 10.7554/eLife.85998 (PMC11984960; doi:10.7554/eLife.85998)
Supplement: Figure 8—source data 1. [file elife-85998-fig8-data1.xlsx]

## Sheet: Raw data
	Number	Sex	Date of birth	Mother	Father	Genotype	Experiments
	1	M	2019-01-10	5723	5318	Ncs1+/-
	2	F	2019-01-10	5723	5318	Ncs1+/+
	3	M	2019-01-10	5724	5319	Ncs1-/-
	4	F	2019-01-10	5724	5319	Ncs1+/+
	5	F	2019-01-10	5724	5319	Ncs1+/+
	6	F	2019-01-10	5724	5319	Ncs1+/-
	7	M	2019-03-01	5722	5711	Ncs1+/-
	8	M	2019-03-01	5722	5711	Ncs1+/+
	9	F	2019-03-01	5722	5711	Ncs1+/-
	10	F	2019-03-01	5722	5711	Ncs1+/-
	11	M	2019-03-09	5724	5319	Ncs1+/-
	12	M	2019-03-09	5724	5319	Ncs1+/+
	13	F	2019-03-09	5724	5319	Ncs1+/-
	14	M	2019-03-20	5723	5318	Ncs1+/-
	15	M	2019-03-20	5723	5318	Ncs1+/-
	16	F	2019-03-20	5723	5318	Ncs1+/-
	17	F	2019-03-20	5723	5318	Ncs1+/-
	18	F	2019-03-20	5723	5318	Ncs1+/-
	19	M	2019-03-25	NCS1 #6	5711	Ncs1+/+
	20	M	2019-03-25	NCS1 #6	5711	Ncs1+/-
	21	M	2019-03-25	NCS1 #6	5711	Ncs1-/-
	22	M	2019-03-25	NCS1 #6	5711	Ncs1-/-
	23	F	2019-03-25	NCS1 #6	5711	Ncs1+/-
	24	F	2019-03-25	NCS1 #6	5711	Ncs1+/+
	25	F	2019-03-25	NCS1 #6	5711	Ncs1+/+
	26	M	2019-03-25	5722	5711	Ncs1+/-
	27	M	2019-03-25	5722	5711	Ncs1+/-
	28	M	2019-03-25	5722	5711	Ncs1+/-
	29	F	2019-03-25	5722	5711	Ncs1+/-
	30	F	2019-03-25	5722	5711	Ncs1+/-
	31	F	2019-04-12	5723	5318	Ncs1+/-
	32	F	2019-04-12	5723	5318	Ncs1+/-
	33	F	2019-04-12	5723	5318	Ncs1+/-
	34	F	2019-04-12	5723	5318	Ncs1+/+
	35	M	2019-05-13	NCS1 #6	NCS1 #HM6	Ncs1+/+	20-week-old HE (testis)
	36	M	2019-05-13	NCS1 #6	NCS1 #HM6	Ncs1-/-	20-week-old HE (testis)
	37	F	2019-05-13	NCS1 #6	NCS1 #HM6	Ncs1+/-
	38	F	2019-05-13	NCS1 #6	NCS1 #HM6	Ncs1+/+	50-week-old HE (retina and kidney)
	39	F	2019-05-13	NCS1 #6	NCS1 #HM6	Ncs1+/+	50-week-old HE (retina and kidney)
	40	M	2019-05-14	NCS1 #HF5	NCS1 #HM5	Ncs1+/-
	41	F	2019-05-14	NCS1 #HF5	NCS1 #HM5	Ncs1+/-
	42	F	2019-05-14	NCS1 #HF5	NCS1 #HM5	Ncs1-/-
	43	F	2019-05-14	NCS1 #HF5	NCS1 #HM5	Ncs1+/-
	44	M	2019-05-14	NCS1 #9	NCS1 #7	Ncs1+/-
	45	M	2019-05-14	NCS1 #9	NCS1 #7	Ncs1+/-
	46	M	2019-05-14	NCS1 #9	NCS1 #7	Ncs1+/+
	47	M	2019-05-14	NCS1 #9	NCS1 #7	Ncs1+/-
	48	F	2019-05-14	NCS1 #9	NCS1 #7	Ncs1+/+
	49	F	2019-05-14	NCS1 #9	NCS1 #7	Ncs1+/-
	50	F	2019-05-14	NCS1 #13	5318	Ncs1+/-
	51	F	2019-05-14	NCS1 #13	5318	Ncs1+/+
	52	F	2019-05-14	NCS1 #13	5318	Ncs1-/-
	53	F	2019-05-14	NCS1 #13	5318	Ncs1+/+	50-week-old HE (retina and kidney)
	54	F	2019-05-14	NCS1 #13	5318	Ncs1-/-	50-week-old HE (retina and kidney)
	55	F	2019-05-14	NCS1 #13	5318	Ncs1+/-
	56	M	2019-05-16	NCS1 #HF1	NCS1 #HM1	Ncs1+/+	20-week-old HE (testis)
	57	M	2019-05-16	NCS1 #HF1	NCS1 #HM1	Ncs1-/-	20-week-old HE (testis)
	58	M	2019-05-16	NCS1 #HF1	NCS1 #HM1	Ncs1+/-
	59	F	2019-05-16	NCS1 #HF1	NCS1 #HM1	Ncs1+/-
	60	F	2019-05-16	NCS1 #HF1	NCS1 #HM1	Ncs1+/-
	61	F	2019-05-16	NCS1 #HF1	NCS1 #HM1	Ncs1+/-
	62	F	2019-05-16	NCS1 #HF1	NCS1 #HM1	Ncs1+/-
	63	M	2019-05-16	NCS1 #HF2	NCS1 #HM2	Ncs1-/-	20-week-old HE (testis)
	64	M	2019-05-16	NCS1 #HF2	NCS1 #HM2	Ncs1+/+	20-week-old HE (testis)
	65	F	2019-05-16	NCS1 #HF2	NCS1 #HM2	Ncs1+/-
	66	F	2019-05-16	NCS1 #HF2	NCS1 #HM2	Ncs1-/-
	67	F	2019-05-16	NCS1 #HF2	NCS1 #HM2	Ncs1+/+
	68	M	2019-05-16	NCS1 #HF3	NCS1 #HM3	Ncs1+/+	50-week-old HE (retina and kidney)
	69	M	2019-05-16	NCS1 #HF3	NCS1 #HM3	Ncs1-/-	50-week-old HE (retina and kidney)
	70	M	2019-05-16	NCS1 #HF3	NCS1 #HM3	Ncs1+/-
	71	M	2019-05-16	NCS1 #HF3	NCS1 #HM3	Ncs1+/-
	72	F	2019-05-16	NCS1 #HF3	NCS1 #HM3	Ncs1+/+
	73	F	2019-05-16	NCS1 #HF3	NCS1 #HM3	Ncs1-/-
	74	F	2019-05-16	NCS1 #HF3	NCS1 #HM3	Ncs1+/+
	75	F	2019-05-16	NCS1 #HF3	NCS1 #HM3	Ncs1+/-
	76	M	2019-05-16	NCS1 #HF4	NCS1 #HM4	Ncs1-/-	50-week-old HE (retina and kidney)
	77	M	2019-05-16	NCS1 #HF4	NCS1 #HM4	Ncs1+/+	50-week-old HE (retina and kidney)
	78	M	2019-05-16	NCS1 #HF4	NCS1 #HM4	Ncs1+/+
	79	M	2019-05-16	NCS1 #HF4	NCS1 #HM4	Ncs1+/-
	80	M	2019-05-16	NCS1 #HF4	NCS1 #HM4	Ncs1+/-
	81	F	2019-05-16	NCS1 #HF4	NCS1 #HM4	Ncs1-/-	50-week-old HE (retina and kidney)
	82	F	2019-05-16	NCS1 #HF4	NCS1 #HM4	Ncs1-/-	50-week-old HE (retina and kidney)
	83	M	2019-05-16	NCS1 #10	NCS1 #11	Ncs1+/-
	84	M	2019-05-16	NCS1 #10	NCS1 #11	Ncs1+/-
	85	M	2019-05-16	NCS1 #10	NCS1 #11	Ncs1+/-
	86	F	2019-05-16	NCS1 #10	NCS1 #11	Ncs1-/-
	87	F	2019-05-16	NCS1 #10	NCS1 #11	Ncs1+/+
	88	M	2019-06-10	NCS1 #HF7	NCS1 #HM2	Ncs1-/-
	89	M	2019-06-10	NCS1 #HF7	NCS1 #HM2	Ncs1+/+
	90	M	2019-06-10	NCS1 #HF7	NCS1 #HM2	Ncs1+/+
	91	F	2019-06-10	NCS1 #HF7	NCS1 #HM2	Ncs1-/-
	92	M	2019-06-11	NCS1 #HF12	NCS1 #HM7	Ncs1+/+
	93	M	2019-06-11	NCS1 #HF12	NCS1 #HM7	Ncs1-/-
	94	M	2019-06-11	NCS1 #HF12	NCS1 #HM7	Ncs1+/+
	95	F	2019-06-11	NCS1 #HF12	NCS1 #HM7	Ncs1-/-
	96	F	2019-06-11	NCS1 #HF12	NCS1 #HM7	Ncs1+/+
	97	F	2019-06-11	NCS1 #HF12	NCS1 #HM7	Ncs1+/-
	98	F	2019-06-11	NCS1 #HF12	NCS1 #HM7	Ncs1+/-
	99	F	2019-06-11	NCS1 #HF12	NCS1 #HM7	Ncs1+/-
	100	M	2019-06-11	NCS1 #HF13	NCS1 #HM8	Ncs1+/-
	101	M	2019-06-11	NCS1 #HF13	NCS1 #HM8	Ncs1+/-
	102	M	2019-06-11	NCS1 #HF13	NCS1 #HM8	Ncs1+/+
	103	F	2019-06-11	NCS1 #HF13	NCS1 #HM8	Ncs1+/-
	104	F	2019-06-11	NCS1 #HF13	NCS1 #HM8	Ncs1+/+
	105	F	2019-06-11	NCS1 #HF13	NCS1 #HM8	Ncs1+/+
	106	F	2019-06-11	NCS1 #HF13	NCS1 #HM8	Ncs1+/-
	107	F	2019-06-11	NCS1 #HF13	NCS1 #HM8	Ncs1+/-
	108	F	2019-06-11	NCS1 #HF13	NCS1 #HM8	Ncs1-/-
	109	M	2019-06-11	NCS1 #30	NCS1 #15	Ncs1+/-
	110	M	2019-06-11	NCS1 #30	NCS1 #15	Ncs1+/-
	111	M	2019-06-11	NCS1 #30	NCS1 #15	Ncs1-/-
	112	M	2019-06-11	NCS1 #30	NCS1 #15	Ncs1+/-
	113	F	2019-06-11	NCS1 #30	NCS1 #15	Ncs1-/-
	114	F	2019-06-11	NCS1 #30	NCS1 #15	Ncs1-/-
	115	M	6/12.19	NCS1 #HF9	NCS1 #HM4	Ncs1-/-
	116	M	6/12.19	NCS1 #HF9	NCS1 #HM4	Ncs1+/+
	117	M	6/12.19	NCS1 #HF9	NCS1 #HM4	Ncs1+/-
	118	F	6/12.19	NCS1 #HF9	NCS1 #HM4	Ncs1-/-
	119	F	6/12.19	NCS1 #HF9	NCS1 #HM4	Ncs1+/-
	120	F	6/12.19	NCS1 #HF9	NCS1 #HM4	Ncs1+/-
	121	M	2019-06-13	NCS1 #HF11	NCS1 #HM6	Ncs1-/-
	122	M	2019-06-13	NCS1 #HF11	NCS1 #HM6	Ncs1+/-
	123	M	2019-06-13	NCS1 #HF11	NCS1 #HM6	Ncs1+/-
	124	M	2019-06-13	NCS1 #HF11	NCS1 #HM6	Ncs1+/-
	125	M	2019-06-13	NCS1 #HF11	NCS1 #HM6	Ncs1+/-
	126	F	2019-06-13	NCS1 #HF11	NCS1 #HM6	Ncs1+/+
	127	F	2019-06-13	NCS1 #HF11	NCS1 #HM6	Ncs1-/-
	128	F	2019-06-13	NCS1 #HF11	NCS1 #HM6	Ncs1+/-
	129	F	2019-06-13	NCS1 #HF11	NCS1 #HM6	Ncs1+/-
	130	F	2019-06-13	NCS1 #29	NCS1 #14	Ncs1+/+
	131	F	2019-06-13	NCS1 #29	NCS1 #14	Ncs1+/+
	132	F	2019-06-13	NCS1 #29	NCS1 #14	Ncs1+/-
	133	M	2019-06-26	NCS1 #6	NCS1 #HM2	Ncs1+/+
	134	M	2019-06-26	NCS1 #6	NCS1 #HM2	Ncs1+/+
	135	F	2019-06-26	NCS1 #6	NCS1 #HM2	Ncs1+/+
	136	F	2019-06-26	NCS1 #6	NCS1 #HM2	Ncs1-/-
	137	F	2019-06-26	NCS1 #6	NCS1 #HM2	Ncs1-/-
	138	F	2019-06-26	NCS1 #6	NCS1 #HM2	Ncs1+/-
	139	F	2019-06-26	NCS1 #6	NCS1 #HM2	Ncs1+/+
	140	F	2019-06-26	NCS1 #6	NCS1 #HM2	Ncs1+/-
	141	M	2019-06-26	NCS1 #13	NCS1 #HM8	Ncs1+/-
	142	M	2019-06-26	NCS1 #13	NCS1 #HM8	Ncs1+/+
	143	M	2019-06-26	NCS1 #13	NCS1 #HM8	Ncs1-/-
	144	M	2019-06-26	NCS1 #13	NCS1 #HM8	Ncs1-/-
	145	M	2019-06-26	NCS1 #13	NCS1 #HM8	Ncs1+/-
	146	F	2019-06-26	NCS1 #13	NCS1 #HM8	Ncs1-/-
	147	F	2019-06-26	NCS1 #13	NCS1 #HM8	Ncs1+/-
	148	F	2019-06-26	NCS1 #13	NCS1 #HM8	Ncs1+/-
	149	M	2019-06-27	NCS1 #9	NCS1 #HM7	Ncs1+/-
	150	M	2019-06-27	NCS1 #9	NCS1 #HM7	Ncs1+/+
	151	F	2019-06-27	NCS1 #9	NCS1 #HM7	Ncs1+/-
	152	F	2019-06-27	NCS1 #9	NCS1 #HM7	Ncs1+/-
	153	F	2019-06-27	NCS1 #9	NCS1 #HM7	Ncs1+/+
	154	F	2019-06-27	NCS1 #9	NCS1 #HM7	Ncs1+/+
	155	F	2019-06-27	NCS1 #9	NCS1 #HM7	Ncs1-/-
	156	F	2019-06-27	NCS1 #9	NCS1 #HM7	Ncs1+/+
	157	M	2019-07-23	NCS1 #HF1	NCS1 #HM3	Ncs1+/-	Figure 8D-fat weight measurement
	158	M	2019-07-23	NCS1 #HF1	NCS1 #HM3	Ncs1-/-	Figure 8D-fat weight measurement
	159	M	2019-07-23	NCS1 #HF1	NCS1 #HM3	Ncs1+/-	Figure 8D-fat weight measurement
	160	F	2019-07-23	NCS1 #HF1	NCS1 #HM3	Ncs1+/-
	161	f	2019-07-23	NCS1 #HF1	NCS1 #HM3	Ncs1+/+
	162	F	2019-07-23	NCS1 #HF1	NCS1 #HM3	Ncs1-/-
	163	F	2019-07-23	NCS1 #HF1	NCS1 #HM3	Ncs1+/+
	164	F	2019-07-23	NCS1 #HF1	NCS1 #HM3	Ncs1+/+
	165	M	2019-07-23	NCS1 #HF7	NCS1 #HM6	Ncs1+/-	Figure 8D-fat weight measurement
	166	M	2019-07-23	NCS1 #HF7	NCS1 #HM6	Ncs1+/-	Figure 8D-fat weight measurement
	167	M	2019-07-23	NCS1 #HF7	NCS1 #HM6	Ncs1+/-	Figure 8D-fat weight measurement
	168	M	2019-07-23	NCS1 #HF7	NCS1 #HM6	Ncs1-/-	Figure 8D-fat weight measurement
	169	F	2019-07-23	NCS1 #HF7	NCS1 #HM6	Ncs1+/+
	170	F	2019-07-23	NCS1 #HF7	NCS1 #HM6	Ncs1-/-
	171	F	2019-07-23	NCS1 #HF7	NCS1 #HM6	Ncs1-/-
	172	F	2019-07-23	NCS1 #HF7	NCS1 #HM6	Ncs1+/-
	173	M	2019-07-24	NCS1 #32	NCS1 #HM9	Ncs1+/-
	174	M	2019-07-24	NCS1 #32	NCS1 #HM9	Ncs1+/-
	175	F	2019-07-24	NCS1 #32	NCS1 #HM9	Ncs1-/-
	176	F	2019-07-24	NCS1 #32	NCS1 #HM9	Ncs1+/+
	177	F	2019-07-24	NCS1 #32	NCS1 #HM9	Ncs1+/-
	178	F	2019-07-24	NCS1 #32	NCS1 #HM9	Ncs1-/-
	179	F	2019-07-24	NCS1 #32	NCS1 #HM9	Ncs1+/-
	180	M	2019-07-26	NCS1 #HF2	NCS1 #HM4	Ncs1+/+
	181	M	2019-07-26	NCS1 #HF2	NCS1 #HM4	Ncs1-/-
	182	M	2019-07-26	NCS1 #HF2	NCS1 #HM4	Ncs1-/-	Figure 8D-fat weight measurement
	183	M	2019-07-26	NCS1 #HF2	NCS1 #HM4	Ncs1-/-	Figure 8D-fat weight measurement
	184	F	2019-07-26	NCS1 #HF2	NCS1 #HM4	Ncs1+/-
	185	F	2019-07-26	NCS1 #HF2	NCS1 #HM4	Ncs1-/-
	186	M	2019-07-27	NCS1 #HF3	NCS1 #HM5	Ncs1-/-
	187	M	2019-07-27	NCS1 #HF3	NCS1 #HM5	Ncs1+/+
	188	M	2019-07-27	NCS1 #HF3	NCS1 #HM5	Ncs1+/-
	189	M	2019-07-27	NCS1 #HF3	NCS1 #HM5	Ncs1+/-
	190	F	2019-07-27	NCS1 #HF3	NCS1 #HM5	Ncs1+/+
	191	F	2019-07-27	NCS1 #HF3	NCS1 #HM5	Ncs1+/-
	192	F	2019-07-27	NCS1 #HF3	NCS1 #HM5	Ncs1+/-
	193	F	2019-07-27	NCS1 #HF3	NCS1 #HM5	Ncs1+/-
	194	M	2019-08-09	NCS1 #HF9	NCS1 #HM3	Ncs1+/-
	195	M	2019-08-09	NCS1 #HF9	NCS1 #HM3	Ncs1-/-
	196	F	2019-08-09	NCS1 #HF9	NCS1 #HM3	Ncs1+/+
	197	F	2019-08-09	NCS1 #HF9	NCS1 #HM3	Ncs1-/-
	198	F	2019-08-09	NCS1 #HF9	NCS1 #HM3	Ncs1+/-
	199	F	2019-08-09	NCS1 #HF9	NCS1 #HM3	Ncs1-/-
	200	F	2019-08-09	NCS1 #HF9	NCS1 #HM3	Ncs1+/-
	201	F	2019-08-09	NCS1 #HF9	NCS1 #HM3	Ncs1+/-
	202	M	2019-08-10	NCS1 #HF13	NCS1 #HM6	Ncs1+/+
	203	M	2019-08-10	NCS1 #HF13	NCS1 #HM6	Ncs1-/-
	204	M	2019-08-10	NCS1 #HF13	NCS1 #HM6	Ncs1+/-
	205	F	2019-08-10	NCS1 #HF13	NCS1 #HM6	Ncs1+/-
	206	F	2019-08-10	NCS1 #HF13	NCS1 #HM6	Ncs1+/+
	207	F	2019-08-10	NCS1 #HF13	NCS1 #HM6	Ncs1-/-
	208	M	2019-08-10	NCS1 #HF12	NCS1 #HM5	Ncs1-/-
	209	F	2019-08-10	NCS1 #HF12	NCS1 #HM5	Ncs1-/-
	210	F	2019-08-10	NCS1 #HF12	NCS1 #HM5	Ncs1+/+
	211	F	2019-08-10	NCS1 #HF12	NCS1 #HM5	Ncs1+/-
	212	F	2019-08-18	NCS1 #13	NCS1 #HM4	Ncs1+/-
	213	F	2019-08-18	NCS1 #13	NCS1 #HM4	Ncs1+/-
	214	F	2019-08-18	NCS1 #13	NCS1 #HM4	Ncs1+/-
	215	F	2019-08-18	NCS1 #13	NCS1 #HM4	Ncs1+/+
	216	F	2019-08-18	NCS1 #13	NCS1 #HM4	Ncs1+/-
	217	F	2019-08-18	NCS1 #13	NCS1 #HM4	Ncs1+/+
	218	F	2019-08-18	NCS1 #13	NCS1 #HM4	Ncs1+/-
	219	F	2019-08-20	NCS1 #HF15	NCS1 #HM10	Ncs1+/-
	220	F	2019-08-20	NCS1 #HF15	NCS1 #HM10	Ncs1+/-
	221	F	2019-08-20	NCS1 #HF15	NCS1 #HM10	Ncs1+/+
	222	F	2019-08-20	NCS1 #HF15	NCS1 #HM10	Ncs1-/-
	223	M	2019-08-21	NCS1 #HF14	NCS1 #HM9	Ncs1+/+
	224	M	2019-08-21	NCS1 #HF14	NCS1 #HM9	Ncs1-/-
	225	M	2019-08-21	NCS1 #HF14	NCS1 #HM9	Ncs1+/-
	226	F	2019-08-21	NCS1 #HF14	NCS1 #HM9	Ncs1+/+
	227	F	2019-08-21	NCS1 #HF14	NCS1 #HM9	Ncs1+/-
	228	F	2019-08-21	NCS1 #HF14	NCS1 #HM9	Ncs1+/-
	229	F	2019-08-21	NCS1 #HF14	NCS1 #HM9	Ncs1+/-
	230	M	2019-08-22	NCS1 #17	NCS1 #HM5	Ncs1+/-
	231	M	2019-08-22	NCS1 #17	NCS1 #HM5	Ncs1+/-
	232	M	2019-08-22	NCS1 #17	NCS1 #HM5	Ncs1+/-
	233	M	2019-08-22	NCS1 #17	NCS1 #HM5	Ncs1+/+
	234	M	2019-08-22	NCS1 #17	NCS1 #HM5	Ncs1+/-
	235	M	2019-08-22	NCS1 #17	NCS1 #HM5	Ncs1+/-
	236	F	2019-08-22	NCS1 #17	NCS1 #HM5	Ncs1-/-
	237	F	2019-08-22	NCS1 #17	NCS1 #HM5	Ncs1+/+
	238	F	2019-08-22	NCS1 #17	NCS1 #HM5	Ncs1-/-
	239	M	2019-10-15	NCS1 #HF26	NCS1 #HM6	Ncs1+/+
	240	M	2019-10-15	NCS1 #HF26	NCS1 #HM6	Ncs1+/-
	241	M	2019-10-15	NCS1 #HF26	NCS1 #HM6	Ncs1+/-
	242	M	2019-10-15	NCS1 #HF26	NCS1 #HM6	Ncs1-/-
	243	F	2019-10-15	NCS1 #HF26	NCS1 #HM6	Ncs1+/+
	244	F	2019-10-15	NCS1 #HF26	NCS1 #HM6	Ncs1+/+
	245	M	2019-10-28	NCS1 #98	NCS1 #HM4	Ncs1+/-
	246	M	2019-10-28	NCS1 #98	NCS1 #HM4	Ncs1+/+
	247	M	2019-10-28	NCS1 #98	NCS1 #HM4	Ncs1+/+
	248	M	2019-10-28	NCS1 #98	NCS1 #HM4	Ncs1+/+
	249	M	2019-10-28	NCS1 #98	NCS1 #HM4	Ncs1+/-
	250	M	2019-11-12	NCS1 #97	NCS1 #HM3	Ncs1+/+
	251	M	2019-11-12	NCS1 #97	NCS1 #HM3	Ncs1-/-
	252	F	2019-11-12	NCS1 #97	NCS1 #HM3	Ncs1+/+
	253	F	2019-11-12	NCS1 #97	NCS1 #HM3	Ncs1+/+
	254	F	2019-11-12	NCS1 #97	NCS1 #HM3	Ncs1-/-
	255	F	2019-11-12	NCS1 #97	NCS1 #HM3	Ncs1+/-
	256	F	2019-11-12	NCS1 #97	NCS1 #HM3	Ncs1+/-
	257	F	2019-11-12	NCS1 #97	NCS1 #HM3	Ncs1+/-

## Sheet: Male
	Number	Sex	Date of birth	Mother	Father	Genotype		Number	Sex	Date of birth	Mother	Father	Genotype		Number	Sex	Date of birth	Mother	Father	Genotype
	141	M	2019-06-26	NCS1 #13	NCS1 #HM8	Het		3	M	2019-01-10	5724	5319	KO		8	M	2019-03-01	5722	5711	WT
	145	M	2019-06-26	NCS1 #13	NCS1 #HM8	Het		21	M	2019-03-25	NCS1 #6	5711	KO		12	M	2019-03-09	5724	5319	WT
	149	M	2019-06-27	NCS1 #9	NCS1 #HM7	Het		22	M	2019-03-25	NCS1 #6	5711	KO		19	M	2019-03-25	NCS1 #6	5711	WT
	157	M	2019-07-23	NCS1 #HF1	NCS1 #HM3	Het		36	M	2019-05-13	NCS1 #6	NCS1 #HM6	KO		35	M	2019-05-13	NCS1 #6	NCS1 #HM6	WT
	159	M	2019-07-23	NCS1 #HF1	NCS1 #HM3	Het		57	M	2019-05-16	NCS1 #HF1	NCS1 #HM1	KO		46	M	2019-05-14	NCS1 #9	NCS1 #7	WT
	165	M	2019-07-23	NCS1 #HF7	NCS1 #HM6	Het		63	M	2019-05-16	NCS1 #HF2	NCS1 #HM2	KO		56	M	2019-05-16	NCS1 #HF1	NCS1 #HM1	WT
	166	M	2019-07-23	NCS1 #HF7	NCS1 #HM6	Het		69	M	2019-05-16	NCS1 #HF3	NCS1 #HM3	KO		64	M	2019-05-16	NCS1 #HF2	NCS1 #HM2	WT
	167	M	2019-07-23	NCS1 #HF7	NCS1 #HM6	Het		76	M	2019-05-16	NCS1 #HF4	NCS1 #HM4	KO		68	M	2019-05-16	NCS1 #HF3	NCS1 #HM3	WT
	173	M	2019-07-24	NCS1 #32	NCS1 #HM9	Het		88	M	2019-06-10	NCS1 #HF7	NCS1 #HM2	KO		77	M	2019-05-16	NCS1 #HF4	NCS1 #HM4	WT
	174	M	2019-07-24	NCS1 #32	NCS1 #HM9	Het		93	M	2019-06-11	NCS1 #HF12	NCS1 #HM7	KO		78	M	2019-05-16	NCS1 #HF4	NCS1 #HM4	WT
	188	M	2019-07-27	NCS1 #HF3	NCS1 #HM5	Het		111	M	2019-06-11	NCS1 #30	NCS1 #15	KO		89	M	2019-06-10	NCS1 #HF7	NCS1 #HM2	WT
	189	M	2019-07-27	NCS1 #HF3	NCS1 #HM5	Het		115	M	6/12.19	NCS1 #HF9	NCS1 #HM4	KO		90	M	2019-06-10	NCS1 #HF7	NCS1 #HM2	WT
	194	M	2019-08-09	NCS1 #HF9	NCS1 #HM3	Het		121	M	2019-06-13	NCS1 #HF11	NCS1 #HM6	KO		92	M	2019-06-11	NCS1 #HF12	NCS1 #HM7	WT
	204	M	2019-08-10	NCS1 #HF13	NCS1 #HM6	Het		143	M	2019-06-26	NCS1 #13	NCS1 #HM8	KO		94	M	2019-06-11	NCS1 #HF12	NCS1 #HM7	WT
	225	M	2019-08-21	NCS1 #HF14	NCS1 #HM9	Het		144	M	2019-06-26	NCS1 #13	NCS1 #HM8	KO		102	M	2019-06-11	NCS1 #HF13	NCS1 #HM8	WT
	230	M	2019-08-22	NCS1 #17	NCS1 #HM5	Het		158	M	2019-07-23	NCS1 #HF1	NCS1 #HM3	KO		116	M	6/12.19	NCS1 #HF9	NCS1 #HM4	WT
	231	M	2019-08-22	NCS1 #17	NCS1 #HM5	Het		168	M	2019-07-23	NCS1 #HF7	NCS1 #HM6	KO		133	M	2019-06-26	NCS1 #6	NCS1 #HM2	WT
	232	M	2019-08-22	NCS1 #17	NCS1 #HM5	Het		181	M	2019-07-26	NCS1 #HF2	NCS1 #HM4	KO		134	M	2019-06-26	NCS1 #6	NCS1 #HM2	WT
	234	M	2019-08-22	NCS1 #17	NCS1 #HM5	Het		182	M	2019-07-26	NCS1 #HF2	NCS1 #HM4	KO		142	M	2019-06-26	NCS1 #13	NCS1 #HM8	WT
	235	M	2019-08-22	NCS1 #17	NCS1 #HM5	Het		183	M	2019-07-26	NCS1 #HF2	NCS1 #HM4	KO		150	M	2019-06-27	NCS1 #9	NCS1 #HM7	WT
	240	M	2019-10-15	NCS1 #HF26	NCS1 #HM6	Het		186	M	2019-07-27	NCS1 #HF3	NCS1 #HM5	KO		180	M	2019-07-26	NCS1 #HF2	NCS1 #HM4	WT
	241	M	2019-10-15	NCS1 #HF26	NCS1 #HM6	Het		195	M	2019-08-09	NCS1 #HF9	NCS1 #HM3	KO		187	M	2019-07-27	NCS1 #HF3	NCS1 #HM5	WT
	245	M	2019-10-28	NCS1 #98	NCS1 #HM4	Het		203	M	2019-08-10	NCS1 #HF13	NCS1 #HM6	KO		202	M	2019-08-10	NCS1 #HF13	NCS1 #HM6	WT
	249	M	2019-10-28	NCS1 #98	NCS1 #HM4	Het		208	M	2019-08-10	NCS1 #HF12	NCS1 #HM5	KO		223	M	2019-08-21	NCS1 #HF14	NCS1 #HM9	WT
	1	M	2019-01-10	5723	5318	Het		224	M	2019-08-21	NCS1 #HF14	NCS1 #HM9	KO		233	M	2019-08-22	NCS1 #17	NCS1 #HM5	WT
	7	M	2019-03-01	5722	5711	Het		242	M	2019-10-15	NCS1 #HF26	NCS1 #HM6	KO		239	M	2019-10-15	NCS1 #HF26	NCS1 #HM6	WT
	11	M	2019-03-09	5724	5319	Het		251	M	2019-11-12	NCS1 #97	NCS1 #HM3	KO		246	M	2019-10-28	NCS1 #98	NCS1 #HM4	WT
	14	M	2019-03-20	5723	5318	Het							27		247	M	2019-10-28	NCS1 #98	NCS1 #HM4	WT
	15	M	2019-03-20	5723	5318	Het									248	M	2019-10-28	NCS1 #98	NCS1 #HM4	WT
	20	M	2019-03-25	NCS1 #6	5711	Het									250	M	2019-11-12	NCS1 #97	NCS1 #HM3	WT
	26	M	2019-03-25	5722	5711	Het														30
	27	M	2019-03-25	5722	5711	Het
	28	M	2019-03-25	5722	5711	Het
	40	M	2019-05-14	NCS1 #HF5	NCS1 #HM5	Het
	44	M	2019-05-14	NCS1 #9	NCS1 #7	Het
	45	M	2019-05-14	NCS1 #9	NCS1 #7	Het
	47	M	2019-05-14	NCS1 #9	NCS1 #7	Het
	58	M	2019-05-16	NCS1 #HF1	NCS1 #HM1	Het
	70	M	2019-05-16	NCS1 #HF3	NCS1 #HM3	Het
	71	M	2019-05-16	NCS1 #HF3	NCS1 #HM3	Het
	79	M	2019-05-16	NCS1 #HF4	NCS1 #HM4	Het
	80	M	2019-05-16	NCS1 #HF4	NCS1 #HM4	Het
	83	M	2019-05-16	NCS1 #10	NCS1 #11	Het
	84	M	2019-05-16	NCS1 #10	NCS1 #11	Het
	85	M	2019-05-16	NCS1 #10	NCS1 #11	Het
	100	M	2019-06-11	NCS1 #HF13	NCS1 #HM8	Het
	101	M	2019-06-11	NCS1 #HF13	NCS1 #HM8	Het
	109	M	2019-06-11	NCS1 #30	NCS1 #15	Het
	110	M	2019-06-11	NCS1 #30	NCS1 #15	Het
	112	M	2019-06-11	NCS1 #30	NCS1 #15	Het
	117	M	6/12.19	NCS1 #HF9	NCS1 #HM4	Het
	122	M	2019-06-13	NCS1 #HF11	NCS1 #HM6	Het
	123	M	2019-06-13	NCS1 #HF11	NCS1 #HM6	Het
	124	M	2019-06-13	NCS1 #HF11	NCS1 #HM6	Het
	125	M	2019-06-13	NCS1 #HF11	NCS1 #HM6	Het
						55

## Sheet: Female
	Number	Sex	Date of birth	Mother	Father	Genotype		Number	Sex	Date of birth	Mother	Father	Genotype		Number	Sex	Date of birth	Mother	Father	Genotype
	140	F	2019-06-26	NCS1 #6	NCS1 #HM2	Het		42	F	2019-05-14	NCS1 #HF5	NCS1 #HM5	KO		2	F	2019-01-10	5723	5318	WT
	147	F	2019-06-26	NCS1 #13	NCS1 #HM8	Het		52	F	2019-05-14	NCS1 #13	5318	KO		4	F	2019-01-10	5724	5319	WT
	148	F	2019-06-26	NCS1 #13	NCS1 #HM8	Het		54	F	2019-05-14	NCS1 #13	5318	KO		5	F	2019-01-10	5724	5319	WT
	151	F	2019-06-27	NCS1 #9	NCS1 #HM7	Het		66	F	2019-05-16	NCS1 #HF2	NCS1 #HM2	KO		24	F	2019-03-25	NCS1 #6	5711	WT
	152	F	2019-06-27	NCS1 #9	NCS1 #HM7	Het		73	F	2019-05-16	NCS1 #HF3	NCS1 #HM3	KO		25	F	2019-03-25	NCS1 #6	5711	WT
	160	F	2019-07-23	NCS1 #HF1	NCS1 #HM3	Het		81	F	2019-05-16	NCS1 #HF4	NCS1 #HM4	KO		34	F	2019-04-12	5723	5318	WT
	172	F	2019-07-23	NCS1 #HF7	NCS1 #HM6	Het		82	F	2019-05-16	NCS1 #HF4	NCS1 #HM4	KO		38	F	2019-05-13	NCS1 #6	NCS1 #HM6	WT
	177	F	2019-07-24	NCS1 #32	NCS1 #HM9	Het		86	F	2019-05-16	NCS1 #10	NCS1 #11	KO		39	F	2019-05-13	NCS1 #6	NCS1 #HM6	WT
	179	F	2019-07-24	NCS1 #32	NCS1 #HM9	Het		91	F	2019-06-10	NCS1 #HF7	NCS1 #HM2	KO		48	F	2019-05-14	NCS1 #9	NCS1 #7	WT
	184	F	2019-07-26	NCS1 #HF2	NCS1 #HM4	Het		95	F	2019-06-11	NCS1 #HF12	NCS1 #HM7	KO		51	F	2019-05-14	NCS1 #13	5318	WT
	191	F	2019-07-27	NCS1 #HF3	NCS1 #HM5	Het		108	F	2019-06-11	NCS1 #HF13	NCS1 #HM8	KO		53	F	2019-05-14	NCS1 #13	5318	WT
	192	F	2019-07-27	NCS1 #HF3	NCS1 #HM5	Het		113	F	2019-06-11	NCS1 #30	NCS1 #15	KO		67	F	2019-05-16	NCS1 #HF2	NCS1 #HM2	WT
	193	F	2019-07-27	NCS1 #HF3	NCS1 #HM5	Het		114	F	2019-06-11	NCS1 #30	NCS1 #15	KO		72	F	2019-05-16	NCS1 #HF3	NCS1 #HM3	WT
	198	F	2019-08-09	NCS1 #HF9	NCS1 #HM3	Het		118	F	6/12.19	NCS1 #HF9	NCS1 #HM4	KO		74	F	2019-05-16	NCS1 #HF3	NCS1 #HM3	WT
	200	F	2019-08-09	NCS1 #HF9	NCS1 #HM3	Het		127	F	2019-06-13	NCS1 #HF11	NCS1 #HM6	KO		87	F	2019-05-16	NCS1 #10	NCS1 #11	WT
	201	F	2019-08-09	NCS1 #HF9	NCS1 #HM3	Het		136	F	2019-06-26	NCS1 #6	NCS1 #HM2	KO		96	F	2019-06-11	NCS1 #HF12	NCS1 #HM7	WT
	205	F	2019-08-10	NCS1 #HF13	NCS1 #HM6	Het		137	F	2019-06-26	NCS1 #6	NCS1 #HM2	KO		104	F	2019-06-11	NCS1 #HF13	NCS1 #HM8	WT
	211	F	2019-08-10	NCS1 #HF12	NCS1 #HM5	Het		146	F	2019-06-26	NCS1 #13	NCS1 #HM8	KO		105	F	2019-06-11	NCS1 #HF13	NCS1 #HM8	WT
	212	F	2019-08-18	NCS1 #13	NCS1 #HM4	Het		155	F	2019-06-27	NCS1 #9	NCS1 #HM7	KO		126	F	2019-06-13	NCS1 #HF11	NCS1 #HM6	WT
	213	F	2019-08-18	NCS1 #13	NCS1 #HM4	Het		162	F	2019-07-23	NCS1 #HF1	NCS1 #HM3	KO		130	F	2019-06-13	NCS1 #29	NCS1 #14	WT
	214	F	2019-08-18	NCS1 #13	NCS1 #HM4	Het		170	F	2019-07-23	NCS1 #HF7	NCS1 #HM6	KO		131	F	2019-06-13	NCS1 #29	NCS1 #14	WT
	216	F	2019-08-18	NCS1 #13	NCS1 #HM4	Het		171	F	2019-07-23	NCS1 #HF7	NCS1 #HM6	KO		135	F	2019-06-26	NCS1 #6	NCS1 #HM2	WT
	218	F	2019-08-18	NCS1 #13	NCS1 #HM4	Het		175	F	2019-07-24	NCS1 #32	NCS1 #HM9	KO		139	F	2019-06-26	NCS1 #6	NCS1 #HM2	WT
	219	F	2019-08-20	NCS1 #HF15	NCS1 #HM10	Het		178	F	2019-07-24	NCS1 #32	NCS1 #HM9	KO		153	F	2019-06-27	NCS1 #9	NCS1 #HM7	WT
	220	F	2019-08-20	NCS1 #HF15	NCS1 #HM10	Het		185	F	2019-07-26	NCS1 #HF2	NCS1 #HM4	KO		154	F	2019-06-27	NCS1 #9	NCS1 #HM7	WT
	227	F	2019-08-21	NCS1 #HF14	NCS1 #HM9	Het		197	F	2019-08-09	NCS1 #HF9	NCS1 #HM3	KO		156	F	2019-06-27	NCS1 #9	NCS1 #HM7	WT
	228	F	2019-08-21	NCS1 #HF14	NCS1 #HM9	Het		199	F	2019-08-09	NCS1 #HF9	NCS1 #HM3	KO		161	f	2019-07-23	NCS1 #HF1	NCS1 #HM3	WT
	229	F	2019-08-21	NCS1 #HF14	NCS1 #HM9	Het		207	F	2019-08-10	NCS1 #HF13	NCS1 #HM6	KO		163	F	2019-07-23	NCS1 #HF1	NCS1 #HM3	WT
	255	F	2019-11-12	NCS1 #97	NCS1 #HM3	Het		209	F	2019-08-10	NCS1 #HF12	NCS1 #HM5	KO		164	F	2019-07-23	NCS1 #HF1	NCS1 #HM3	WT
	256	F	2019-11-12	NCS1 #97	NCS1 #HM3	Het		222	F	2019-08-20	NCS1 #HF15	NCS1 #HM10	KO		169	F	2019-07-23	NCS1 #HF7	NCS1 #HM6	WT
	257	F	2019-11-12	NCS1 #97	NCS1 #HM3	Het		236	F	2019-08-22	NCS1 #17	NCS1 #HM5	KO		176	F	2019-07-24	NCS1 #32	NCS1 #HM9	WT
	6	F	2019-01-10	5724	5319	Het		238	F	2019-08-22	NCS1 #17	NCS1 #HM5	KO		190	F	2019-07-27	NCS1 #HF3	NCS1 #HM5	WT
	9	F	2019-03-01	5722	5711	Het		254	F	2019-11-12	NCS1 #97	NCS1 #HM3	KO		196	F	2019-08-09	NCS1 #HF9	NCS1 #HM3	WT
	10	F	2019-03-01	5722	5711	Het							33		206	F	2019-08-10	NCS1 #HF13	NCS1 #HM6	WT
	13	F	2019-03-09	5724	5319	Het									210	F	2019-08-10	NCS1 #HF12	NCS1 #HM5	WT
	16	F	2019-03-20	5723	5318	Het									215	F	2019-08-18	NCS1 #13	NCS1 #HM4	WT
	17	F	2019-03-20	5723	5318	Het									217	F	2019-08-18	NCS1 #13	NCS1 #HM4	WT
	18	F	2019-03-20	5723	5318	Het									221	F	2019-08-20	NCS1 #HF15	NCS1 #HM10	WT
	23	F	2019-03-25	NCS1 #6	5711	Het									226	F	2019-08-21	NCS1 #HF14	NCS1 #HM9	WT
	29	F	2019-03-25	5722	5711	Het									237	F	2019-08-22	NCS1 #17	NCS1 #HM5	WT
	30	F	2019-03-25	5722	5711	Het									243	F	2019-10-15	NCS1 #HF26	NCS1 #HM6	WT
	31	F	2019-04-12	5723	5318	Het									244	F	2019-10-15	NCS1 #HF26	NCS1 #HM6	WT
	32	F	2019-04-12	5723	5318	Het									252	F	2019-11-12	NCS1 #97	NCS1 #HM3	WT
	33	F	2019-04-12	5723	5318	Het									253	F	2019-11-12	NCS1 #97	NCS1 #HM3	WT
	37	F	2019-05-13	NCS1 #6	NCS1 #HM6	Het														44
	41	F	2019-05-14	NCS1 #HF5	NCS1 #HM5	Het
	43	F	2019-05-14	NCS1 #HF5	NCS1 #HM5	Het
	49	F	2019-05-14	NCS1 #9	NCS1 #7	Het
	50	F	2019-05-14	NCS1 #13	5318	Het
	55	F	2019-05-14	NCS1 #13	5318	Het
	59	F	2019-05-16	NCS1 #HF1	NCS1 #HM1	Het
	60	F	2019-05-16	NCS1 #HF1	NCS1 #HM1	Het
	61	F	2019-05-16	NCS1 #HF1	NCS1 #HM1	Het
	62	F	2019-05-16	NCS1 #HF1	NCS1 #HM1	Het
	65	F	2019-05-16	NCS1 #HF2	NCS1 #HM2	Het
	75	F	2019-05-16	NCS1 #HF3	NCS1 #HM3	Het
	97	F	2019-06-11	NCS1 #HF12	NCS1 #HM7	Het
	98	F	2019-06-11	NCS1 #HF12	NCS1 #HM7	Het
	99	F	2019-06-11	NCS1 #HF12	NCS1 #HM7	Het
	103	F	2019-06-11	NCS1 #HF13	NCS1 #HM8	Het
	106	F	2019-06-11	NCS1 #HF13	NCS1 #HM8	Het
	107	F	2019-06-11	NCS1 #HF13	NCS1 #HM8	Het
	119	F	6/12.19	NCS1 #HF9	NCS1 #HM4	Het
	120	F	6/12.19	NCS1 #HF9	NCS1 #HM4	Het
	128	F	2019-06-13	NCS1 #HF11	NCS1 #HM6	Het
	129	F	2019-06-13	NCS1 #HF11	NCS1 #HM6	Het
	132	F	2019-06-13	NCS1 #29	NCS1 #14	Het
	138	F	2019-06-26	NCS1 #6	NCS1 #HM2	Het
						68

## Sheet: Total
	Actual							Expected
		WT	HET	KO	Total				WT	HET	KO	Total
	Male	30	55	27	112			Male	28	56	28	112
	Female	44	68	33	145			Female	36.25	72.5	36.25	145
	Combined	74	123	60	257			Combined	64.25	128.5	64.25	257

## Sheet: Statistics
	Male
	Table analyzed	Data 1
	Column analyzed	Column A
	Chi-square test
	Chi-square	0.1964
	DF	2
	P value (two-tailed)	0.9065
	P value summary	ns
	Is discrepancy significant (P < 0.05)?	No
	Outcome	Expected #	Observed #	Expected %	Observed %
	WT	28	30	25	26.79
	HET	56	55	50	49.11
	KO	28	27	25	24.11
	TOTAL	112	112	100	100
	Female
	Table analyzed	Data 1
	Column analyzed	Column B
	Chi-square test
	Chi-square	2.228
	DF	2
	P value (two-tailed)	0.3283
	P value summary	ns
	Is discrepancy significant (P < 0.05)?	No
	Outcome	Expected #	Observed #	Expected %	Observed %
	WT	36.25	44	25	30.34
	HET	72.5	68	50	46.9
	KO	36.25	33	25	22.76
	TOTAL	145	145	100	100
	Combined
	Table analyzed	Data 1
	Column analyzed	Column C
	Chi-square test
	Chi-square	1.996
	DF	2
	P value (two-tailed)	0.3686
	P value summary	ns
	Is discrepancy significant (P < 0.05)?	No
	Outcome	Expected #	Observed #	Expected %	Observed %
	WT	64.25	74	25	28.79
	HET	128.5	123	50	47.86
	KO	64.25	60	25	23.35
	TOTAL	257	257	100	100
