# Supplementary material for: Myristoylated Neuronal Calcium Sensor-1 captures the preciliary vesicle at distal appendages
Source: eLife. 2025 Jan 30;14:e85998. doi: 10.7554/eLife.85998 (PMC11984960; doi:10.7554/eLife.85998)
Supplement: Figure 8—source data 2. [file elife-85998-fig8-data2.xlsx]

## Sheet: Raw data
			3W	4W	5W	6W	7W	8W	9W	10W	11W	12W	13W	14W	15W	16W	17W	18W	19W	20W
35	M	WT	8.8	15.9	19.4	20.9	21.3	21.8	22.2	23.9	24.1	24.8	26.1	26.1	26.6	27.1	27.2	27.2	27.8	28.7											3W	4W	5W	6W	7W	8W	9W	10W	11W	12W	13W	14W	15W	16W	17W	18W	19W	20W
56	M	WT	9	14.7	19.4	20.2	21.2	21.7	21.9	23.5	23.5	23.8	25.3	25.6	26	26.1	26.2	27	27.2	27.2								48	F	WT	7.8	11.9	15.8	16.7	16.9	17.1	17.5	18.1	18.7	18.6	19.8	19.4	20.4	20.3	20.5	20.5	20.7	22.2
64	M	WT	10.8	17.2	21.4	22.7	24.2	24.6	25.4	26.9	27.6	28.4	28.7	28.9	29.3	29.8	29.9	30.6	30.8	30								51	F	WT	8.8	13.6	17.3	17.5	18.1	19	18.6	20.3	22	20	21.2	22.3	22.6	22.2	24	23.3	23.1	23.8
68	M	WT	8.5	15.8	20.9	22.2	24.1	24.5	24.4	26.8	28.7	29.8	30.8	31.6	32.1	33.9	34	35.2	35.7	35.5								53	F	WT	8	11.2	14.5	15.5	15.6	16.1	16.3	17.5	18.3	18.4	18.5	19.4	20.7	19.4	19.6	20.5	20.1	21.2
77	M	WT	9.1	14.7	20.2	21.3	23.2	23.7	23.9	25.8	26.7	27	27.9	29	30	30.5	31.1	31.3	31.2	31.5								67	F	WT	9.9	14.1	18	17.8	18.2	18.4	19.2	19.6	20.3	19.4	20	20.1	20.8	22.7	22.2	22.4	22.2	22.4
78	M	WT	9.6	14.6	18.1	19	19.5	20	21.6	22.4	23.4	24.1	25.3	26.5	26.9	26.9	27.8	28.5	29.1	30.2								72	F	WT	8.1	12.5	16.2	17.2	17.4	17.4	18	18.9	19.3	19.7	19.2	20.1	20.8	20.5	19.9	19.9	20.8	22
180	M	WT	9.1	15.7	20.4	22.4	24.1	24.5	26.1	26.5	27.2	27.8	28.2	29	29.8	30.7	30.7	30.2	30.9	30.7								87	F	WT	9.6	13.9	18.1	18.8	19.4	19.4	19.8	21.8	22.1	21.6	23.4	22.8	23.2	23.6	23.5	23.8	24.8	23.7
187	M	WT	8.1	14.6	19.6	21.2	23.1	23.5	24.5	24.9	25.6	26.6	26.5	26.7	27.5	28.4	29.2	29.5	29.8	29.1								74	F	WT	7.7	12.4	16.1	16.8	16.9	17.3	18.5	18.8	19.4	19.2	19.7	20.3	19.7	20.8	20.9	20	20.5	20.8
																												38	f	WT	7.3	12.8	16.5	16.9	16.9	17.3	18.3	18.5	18.9	19	20.3	19.9	20	20.1	20.6	20.5	20.6	20.9
	Average		9.125	15.4	19.925	21.2375	22.5875	23.0375	23.75	25.0875	25.85	26.5375	27.35	27.925	28.525	29.175	29.5125	29.9375	30.3125	30.3625								39	f	WT	8.4	13.5	16.9	16.7	17.1	18	18.3	18.4	19.3	19.6	20.1	20.1	20.4	20.4	20.4	20.6	20.9	21
	S.D.		0.810203	0.92582	1.02922	1.23165	1.72911	1.68687	1.67758	1.68645	2.01353	2.15071	1.90638	2.03663	2.10289	2.5728	2.49482	2.63056	2.62212	2.45877									Average		8.4	12.8778	16.6	17.1	17.3889	17.7778	18.2778	19.1	19.8111	19.5	20.2444	20.4889	20.9556	21.1111	21.2889	21.2778	21.5222	22
	S.E.M.		0.28645	0.327327	0.363883	0.435454	0.611333	0.596399	0.593115	0.596249	0.711889	0.760389	0.674007	0.720057	0.743484	0.909621	0.882051	0.930042	0.927061	0.869305									S.D.		0.877496	0.974394	1.13248	0.905539	1.0729	1.02686	0.994708	1.3	1.38333	0.940744	1.39563	1.21598	1.17059	1.39144	1.57674	1.47968	1.54901	1.15217
																													S.E.M		0.292499	0.324798	0.377492	0.301846	0.357633	0.342287	0.331569	0.433333	0.461111	0.313581	0.465209	0.405327	0.390196	0.463814	0.52558	0.493226	0.516338	0.384057
																												42	F	KO	8.2	12.2	16.6	18.3	19.6	19.3	20	20.8	21.9	21.8	23.4	23.5	24.4	25.7	26.3	27.5	26	26.9
36	M	KO	5.1	11.2	15.9	19.5	20.8	21.5	22	23.6	24.1	24.5	25.8	25.9	26.1	26.1	26.3	25.4	25.8	26.7								52	F	KO	9.1	12.9	17.1	19.3	19.2	20.4	19.8	21.8	25.1	21.5	22.4	23.9	24.7	27.9	27	27.1	27.8	27.6
57	M	KO	8.4	14	20.1	22.1	23.7	24	24.7	26.4	27	27.2	28.6	29.5	30.3	30.3	30.7	31.6	32.1	32.7								54	F	KO	7.5	11.9	15.5	17.1	17.9	19	18.7	20.7	20.9	21.3	20.9	22.4	24.5	23.1	23.3	24.6	26	24.3
63	M	KO	8.8	14.8	21	22.8	24.9	25.6	25	26.5	27.1	27.8	29	29.3	30.2	30.9	31	31.3	31.9	31.4								66	F	KO	9.4	14.2	18.4	18.2	19.3	19.5	19.7	20.7	22.1	21.2	23.4	23.2	25	25.2	25.7	26	26.1	27.9
69	M	KO	7.8	13.2	19.4	21.8	24.1	25.2	25.3	27.9	28.9	30.2	32	31.9	33.2	33.8	34.6	35.4	36.4	36.5								73	F	KO	7.7	11.8	15.7	16.6	17.8	17.7	18.5	20.3	20.3	20	20.8	23.5	20.8	21.3	23	21.9	21.6	22.3
76	M	KO	9.1	15.2	21.1	22.7	24.9	25.4	26.7	28.3	30	29.8	31.1	31.4	33.9	33.5	33.7	34.5	35.6	36.1								86	F	KO	7	10	15.4	17.4	17.2	17.7	18.3	20.4	20.9	20.3	22.2	21	21.4	22.5	23.3	21.5	24	22.1
158	M	KO	9.8	16.6	20.6	23.2	24.9	26.1	27.1	27.1	28.2	29.6	29.8	29.5	30	30.9	32.2	32.4	33.6	33.8								81	F	KO	8.6	13	16.8	18.4	18.1	18.5	20.8	20.5	21.2	22	21.3	21.5	22.1	22.8	22.6	23.4	24.4	25.2
168	M	KO	9.8	15.5	19.8	21.9	23.7	25.4	26.6	27.4	27.6	29.3	30.2	30.6	31.8	32.2	33.2	32	34.4	35								82	F	KO	8.9	13.1	16.9	18.1	18.1	18.4	19.7	19.7	20.7	20.9	21	21.4	21.4	21.5	22	22.8	23	22.1
181	M	KO	8.6	16	21.3	24.2	25.8	26.9	28.4	29.3	29.5	30.9	31.1	31.8	32.1	32.7	33.9	33.8	34.8	34.7
182	M	KO	7.7	14.4	19.6	23	24.6	25.6	27.8	29.1	29.4	30.3	30.5	31.7	31.4	32.2	32.5	33.1	34.7	35
183	M	KO	9.1	16.3	21.5	24.6	25.9	26.9	28.3	29.8	30.7	31.4	32.2	33	33.5	32.6	34.2	34.1	35.4	36.1
186	M	KO	7.1	12.6	18	20.9	23.5	23.9	25.4	25.8	26.3	26.9	27.5	28	28.7	28.6	30.4	30.5	31.1	31.3
	Average		8.3	14.5273	19.8455	22.4273	24.2545	25.1364	26.1182	27.3818	28.0727	28.9	29.8	30.2364	31.0182	31.2545	32.0636	32.1909	33.2545	33.5727									Average		8.3	12.3875	16.55	17.925	18.4	18.8125	19.4375	20.6125	21.6375	21.125	21.925	22.55	23.0375	23.75	24.15	24.35	24.8625	24.8
	S.D.		1.3572	1.67098	1.66215	1.43812	1.40026	1.5416	1.89041	1.79489	1.90688	2.0693	1.94936	2.05537	2.30079	2.28007	2.39845	2.6998	2.9881	2.90898									S.D.		0.845154	1.23917	1.00428	0.851469	0.855236	0.926495	0.858466	0.591457	1.52216	0.696419	1.08332	1.12758	1.76711	2.30155	1.88755	2.32071	1.99352	2.48136
	S.E.M.		0.409212	0.50382	0.501156	0.433609	0.422194	0.464811	0.569979	0.54118	0.574945	0.623917	0.587754	0.619717	0.693714	0.687468	0.723159	0.81402	0.900945	0.877091									S.E.M		0.298807	0.438112	0.355065	0.30104	0.302372	0.327565	0.303514	0.209112	0.538164	0.246221	0.38301	0.398658	0.624768	0.813722	0.667351	0.820496	0.704814	0.877293
	FTEST		0.184012	0.130505	0.216114	0.699879	0.525817	0.769045	0.773002	0.895529	0.846445	0.881292	0.983719	0.987144	0.835639	0.703895	0.879509	0.97555	0.749625	0.673561									FTEST		0.934146	0.514234	0.764327	0.883984	0.563664	0.799128	0.710728	0.0518807	0.787439	0.442729	0.518283	0.855154	0.271251	0.181942	0.622219	0.230648	0.494229	0.0467321
	TTEST		0.145414	0.20121	0.906486	0.0763546	0.0328181	0.0118525	0.0117402	0.0118027	0.02535	0.0271506	0.0142694	0.0265079	0.0272645	0.080139	0.0378751	0.0871597	0.0397518	0.0216555									TTEST		0.814651	0.375996	0.924979	0.0730344	0.05023	0.0464753	0.0219172	0.0086708	0.0203973	0.0011549	0.0150109	0.00258143	0.0110719	0.0109729	0.00390945	0.00490486	0.00147172	0.00818768
58	M	Het	8.7	14.4	19.4	20.4	21.3	21.5	22.5	24.1	24.2	24.8	25.2	26.2	27	27.5	27.6	28.3	29.8	30.1									S.E.M
70	M	Het	7.5	13.6	19.8	21.2	22.9	23.4	24.6	25.6	26.5	26.7	27.1	27.3	27.7	28.8	29.2	28.8	29.7	29.5
71	M	Het	7	12.6	18.5	20	21.2	21.4	22.4	23.5	23.9	24.6	25.1	25.3	25.4	25.8	26.4	26.3	27	26.7								37	F	Het	7.2	12	16.3	16.5	17.4	17.9	17.8	18.8	18.5	19.8	20.1	20.1	20.6	20.4	21.2	21	20.6	21.3
79	M	Het	9.6	16.1	21.5	22.9	24.5	24.7	25.9	25.9	27.2	27.4	27.8	28	29	29	28.9	29.3	28.9	30.1								41	F	Het	7.8	12.2	15.5	17.5	17.1	17.5	18.3	19	19.7	19.6	19.8	20.3	21.2	21	21.9	21.4	22.2	21.9
80	M	Het	9.2	14.9	20.7	22.6	24.3	25.3	26.8	27.9	29.3	30.3	31.9	33.4	34.3	34.1	34.8	35.3	35.6	37								50	F	Het	8.5	12.2	16.1	16.3	16.9	17.4	18.2	18.9	19.7	19.6	20.1	20.3	20.6	20.8	21.2	21.9	22	22.3
157	M	Het	9.1	15.7	18.6	19.8	21.4	22.3	23.3	23.9	24	24.9	25.2	25.2	25.7	26.5	27.6	27.8	28.8	28.3								65	F	Het	10.1	14.4	17.9	17.8	18.6	18.3	19.6	20.6	20.7	20.4	20.9	21.4	21.4	22.8	23.2	22.8	24.1	23.8
159	M	Het	9.1	15.6	19.9	22.2	23.5	24.8	26.1	26.5	26.6	27.5	28	27.9	27.8	28.7	29.7	29.6	30.9	30								75	F	Het	7.9	13	16.4	17.1	17.8	17.5	17.7	18.9	18.9	19.1	19.4	20.5	20.2	20.9	20.3	20.3	20.9	21.6
165	M	Het	9.8	15.9	19.3	21.8	23.7	24.7	25.7	26.5	26.8	27.2	27.7	28	28.4	28.6	28.7	28.7	29.6	30.5
166	M	Het	10.1	15.9	19.7	21.9	23.7	25.4	26	26.8	27.1	28.2	27.8	28.6	29.4	29.6	30.3	30.3	32.5	32.6
167	M	Het	10.1	15.9	18.9	21.9	23.7	25	25.8	26.6	27.5	28.3	28.6	29.4	30.3	30.3	31.1	30	32.4	33.1									Average		8.3	12.76	16.44	17.04	17.56	17.72	18.32	19.24	19.5	19.7	20.06	20.52	20.8	21.18	21.56	21.48	21.96	22.18
188	M	Het	8.6	15.9	20.2	21.5	23.4	23.8	24.6	24.9	24.6	25.6	25.6	26	27.4	26.9	28.3	28.1	29.4	28.3									S.D.		1.1068	0.993982	0.887694	0.638749	0.673053	0.376829	0.759605	0.763544	0.848528	0.469042	0.550454	0.511859	0.489898	0.933809	1.07842	0.941807	1.37949	0.978264
																													S.E.M		0.494975	0.444522	0.396989	0.285657	0.300998	0.168523	0.339706	0.341467	0.379473	0.209762	0.246171	0.22891	0.219089	0.417612	0.482286	0.421189	0.616928	0.437493
																													FTEST (v.s.WT)		0.533518	0.886877	0.671202	0.522242	0.383827	0.0700215	0.632304	0.318983	0.360693	0.194741	0.0899271	0.112199	0.110026	0.45985	0.482984	0.399356	0.87704	0.797397
																													TTEST (v.s. WT)		0.854978	0.833184	0.790745	0.89857	0.754388	0.906789	0.93599	0.8308	0.658596	0.667576	0.784603	0.957945	0.784399	0.923385	0.739817	0.789007	0.609066	0.773703
	Average		8.98182	15.1364	19.6818	21.4727	23.0545	23.8455	24.8818	25.6545	26.1545	26.8636	27.2727	27.7545	28.4	28.7091	29.3273	29.3182	30.4182	30.5636									FTEST (v.s.KO)		0.500304	0.702526	0.8569	0.604386	0.673787	0.10138	0.858628	0.520751	0.275611	0.464183	0.208518	0.145898	0.0259679	0.100544	0.296078	0.100624	0.4972	0.0911985
	S.D.		0.998817	1.14828	0.898686	1.02478	1.20363	1.49356	1.53155	1.39453	1.74319	1.7699	2.01449	2.31705	2.44704	2.24876	2.24414	2.27764	2.33573	2.81186									TTEST (v.s. KO)		1	0.583274	0.844932	0.0722639	0.0904034	0.030661	0.0365508	0.00380807	0.0159245	0.00205223	0.00468314	0.00324127	0.0197529	0.038661	0.0182296	0.0247041	0.0161727	0.0479399
	S.E.M		0.301155	0.346219	0.270964	0.308984	0.362908	0.450326	0.461779	0.420468	0.525593	0.533645	0.607392	0.698617	0.73781	0.678026	0.676635	0.686734	0.704249	0.847807
	FTEST (v.s.WT)		0.594368	0.583139	0.67314	0.576881	0.288461	0.701963	0.766847	0.565006	0.655645	0.55586	0.911204	0.753054	0.706773	0.675205	0.73525	0.655873	0.714636	0.742316
	TTEST (v.s. WT)		0.743329	0.6002	0.590651	0.655448	0.495601	0.285279	0.144714	0.433594	0.728787	0.721387	0.933735	0.869884	0.908716	0.679767	0.867337	0.590359	0.92735	0.873221
	FTEST (v.s.KO)		0.347928	0.252515	0.0653414	0.300371	0.641328	0.922216	0.517645	0.438655	0.782064	0.630452	0.919262	0.711982	0.849296	0.965978	0.837552	0.600814	0.449639	0.916592
	TTEST (v.s. KO)		0.194653	0.330975	0.776896	0.0881458	0.0434893	0.0598882	0.107448	0.0203285	0.0230025	0.0221431	0.0072351	0.0151156	0.0176799	0.0158339	0.0119973	0.0138569	0.0221422	0.0227925

## Sheet: Statistics (male)
	Table Analyzed	Male						Within each row, compare columns (simple effects within rows)
	Two-way ANOVA	Ordinary						Number of families	18
	Alpha	0.05						Number of comparisons per family	3
								Alpha	0.05
	Source of Variation	% of total variation	P value	P value summary	Significant?
	Interaction	0.8261	0.1077	ns	No			Tukey's multiple comparisons test	Predicted (LS) mean diff.	95.00% CI of diff.	Below threshold?	Summary	Adjusted P Value
	Row Factor	85.4	<0.0001	****	Yes
	Column Factor	1.839	<0.0001	****	Yes			3 week
								WT vs. KO	0.825	-1.325 to 2.975	No	ns	0.6392
	ANOVA table	SS (Type III)	DF	MS	F (DFn, DFd)	P value		WT vs. Het	0.1432	-2.007 to 2.293	No	ns	0.9866
	Interaction	174.5	34	5.132	F (34, 486) = 1.325	P=0.1077		KO vs. Het	-0.6818	-2.655 to 1.291	No	ns	0.6955
	Row Factor	18037	17	1061	F (17, 486) = 273.9	P<0.0001
	Column Factor	388.4	2	194.2	F (2, 486) = 50.14	P<0.0001		4 week
	Residual	1882	486	3.873				WT vs. KO	0.8727	-1.277 to 3.023	No	ns	0.6061
								WT vs. Het	0.2636	-1.886 to 2.414	No	ns	0.9552
	Data summary							KO vs. Het	-0.6091	-2.582 to 1.364	No	ns	0.7483
	Number of columns (Column Factor)	3
	Number of rows (Row Factor)	18						5 week
	Number of values	540						WT vs. KO	0.07955	-2.070 to 2.229	No	ns	0.9958
								WT vs. Het	0.2432	-1.907 to 2.393	No	ns	0.9618
								KO vs. Het	0.1636	-1.809 to 2.137	No	ns	0.9793
								6 week
								WT vs. KO	-1.19	-3.340 to 0.9601	No	ns	0.3953
								WT vs. Het	-0.2352	-2.385 to 1.915	No	ns	0.9642
								KO vs. Het	0.9545	-1.018 to 2.927	No	ns	0.4915
								7 week
								WT vs. KO	-1.667	-3.817 to 0.4828	No	ns	0.1632
								WT vs. Het	-0.467	-2.617 to 1.683	No	ns	0.8662
								KO vs. Het	1.2	-0.7729 to 3.173	No	ns	0.3263
								8 week
								WT vs. KO	-2.099	-4.249 to 0.05102	No	ns	0.0574
								WT vs. Het	-0.808	-2.958 to 1.342	No	ns	0.651
								KO vs. Het	1.291	-0.6820 to 3.264	No	ns	0.2739
								9 week
								WT vs. KO	-2.368	-4.518 to -0.2183	Yes	*	0.0267
								WT vs. Het	-1.132	-3.282 to 1.018	No	ns	0.4315
								KO vs. Het	1.236	-0.7365 to 3.209	No	ns	0.3047
								10 week
								WT vs. KO	-2.294	-4.444 to -0.1444	Yes	*	0.0332
								WT vs. Het	-0.567	-2.717 to 1.583	No	ns	0.8092
								KO vs. Het	1.727	-0.2456 to 3.700	No	ns	0.0998
								11 week
								WT vs. KO	-2.223	-4.373 to -0.07284	Yes	*	0.0408
								WT vs. Het	-0.3045	-2.454 to 1.845	No	ns	0.9407
								KO vs. Het	1.918	-0.05469 to 3.891	No	ns	0.0588
								12 week
								WT vs. KO	-2.363	-4.512 to -0.2126	Yes	*	0.0272
								WT vs. Het	-0.3261	-2.476 to 1.824	No	ns	0.9323
								KO vs. Het	2.036	0.06349 to 4.009	Yes	*	0.0412
								13 week
								WT vs. KO	-2.45	-4.600 to -0.3001	Yes	*	0.0208
								WT vs. Het	0.07727	-2.073 to 2.227	No	ns	0.9961
								KO vs. Het	2.527	0.5544 to 4.500	Yes	**	0.0077
								14 week
								WT vs. KO	-2.311	-4.461 to -0.1615	Yes	*	0.0316
								WT vs. Het	0.1705	-1.979 to 2.320	No	ns	0.981
								KO vs. Het	2.482	0.5089 to 4.455	Yes	**	0.0091
								15 week
								WT vs. KO	-2.493	-4.643 to -0.3433	Yes	*	0.0182
								WT vs. Het	0.125	-2.025 to 2.275	No	ns	0.9898
								KO vs. Het	2.618	0.6453 to 4.591	Yes	**	0.0054
					15 week			16 week
					16 week			WT vs. KO	-2.08	-4.229 to 0.07034	No	ns	0.0605
					17 week			WT vs. Het	0.4659	-1.684 to 2.616	No	ns	0.8668
					18 week			KO vs. Het	2.545	0.5726 to 4.518	Yes	**	0.0072
					19 week
					20 week			17 week
								WT vs. KO	-2.551	-4.701 to -0.4013	Yes	*	0.0151
								WT vs. Het	0.1852	-1.965 to 2.335	No	ns	0.9776
								KO vs. Het	2.736	0.7635 to 4.709	Yes	**	0.0034
								18 week
								WT vs. KO	-2.253	-4.403 to -0.1035	Yes	*	0.0374
								WT vs. Het	0.6193	-1.531 to 2.769	No	ns	0.7769
								KO vs. Het	2.873	0.8999 to 4.846	Yes	**	0.0019
								19 week
								WT vs. KO	-2.942	-5.092 to -0.7922	Yes	**	0.0039
								WT vs. Het	-0.1057	-2.256 to 2.044	No	ns	0.9927
								KO vs. Het	2.836	0.8635 to 4.809	Yes	**	0.0023
								20 week
								WT vs. KO	-3.21	-5.360 to -1.060	Yes	**	0.0014
								WT vs. Het	-0.2011	-2.351 to 1.949	No	ns	0.9737
								KO vs. Het	3.009	1.036 to 4.982	Yes	**	0.0011
								Test details	Predicted (LS) mean 1	Predicted (LS) mean 2	Predicted (LS) mean diff.	SE of diff.	N1	N2	q	DF
								Row 1
								WT vs. KO	9.125	8.3	0.825	0.9145	8	11	1.276	486
								WT vs. Het	9.125	8.982	0.1432	0.9145	8	11	0.2214	486
								KO vs. Het	8.3	8.982	-0.6818	0.8392	11	11	1.149	486
								Row 2
								WT vs. KO	15.4	14.53	0.8727	0.9145	8	11	1.35	486
								WT vs. Het	15.4	15.14	0.2636	0.9145	8	11	0.4077	486
								KO vs. Het	14.53	15.14	-0.6091	0.8392	11	11	1.026	486
								Row 3
								WT vs. KO	19.93	19.85	0.07955	0.9145	8	11	0.123	486
								WT vs. Het	19.93	19.68	0.2432	0.9145	8	11	0.3761	486
								KO vs. Het	19.85	19.68	0.1636	0.8392	11	11	0.2758	486
								Row 4
								WT vs. KO	21.24	22.43	-1.19	0.9145	8	11	1.84	486
								WT vs. Het	21.24	21.47	-0.2352	0.9145	8	11	0.3638	486
								KO vs. Het	22.43	21.47	0.9545	0.8392	11	11	1.609	486
								Row 5
								WT vs. KO	22.59	24.25	-1.667	0.9145	8	11	2.578	486
								WT vs. Het	22.59	23.05	-0.467	0.9145	8	11	0.7223	486
								KO vs. Het	24.25	23.05	1.2	0.8392	11	11	2.022	486
								Row 6
								WT vs. KO	23.04	25.14	-2.099	0.9145	8	11	3.246	486
								WT vs. Het	23.04	23.85	-0.808	0.9145	8	11	1.249	486
								KO vs. Het	25.14	23.85	1.291	0.8392	11	11	2.175	486
								Row 7
								WT vs. KO	23.75	26.12	-2.368	0.9145	8	11	3.662	486
								WT vs. Het	23.75	24.88	-1.132	0.9145	8	11	1.75	486
								KO vs. Het	26.12	24.88	1.236	0.8392	11	11	2.084	486
								Row 8
								WT vs. KO	25.09	27.38	-2.294	0.9145	8	11	3.548	486
								WT vs. Het	25.09	25.65	-0.567	0.9145	8	11	0.8769	486
								KO vs. Het	27.38	25.65	1.727	0.8392	11	11	2.911	486
								Row 9
								WT vs. KO	25.85	28.07	-2.223	0.9145	8	11	3.437	486
								WT vs. Het	25.85	26.15	-0.3045	0.9145	8	11	0.471	486
								KO vs. Het	28.07	26.15	1.918	0.8392	11	11	3.233	486
								Row 10
								WT vs. KO	26.54	28.9	-2.363	0.9145	8	11	3.653	486
								WT vs. Het	26.54	26.86	-0.3261	0.9145	8	11	0.5044	486
								KO vs. Het	28.9	26.86	2.036	0.8392	11	11	3.432	486
								Row 11
								WT vs. KO	27.35	29.8	-2.45	0.9145	8	11	3.789	486
								WT vs. Het	27.35	27.27	0.07727	0.9145	8	11	0.1195	486
								KO vs. Het	29.8	27.27	2.527	0.8392	11	11	4.259	486
								Row 12
								WT vs. KO	27.93	30.24	-2.311	0.9145	8	11	3.574	486
								WT vs. Het	27.93	27.75	0.1705	0.9145	8	11	0.2636	486
								KO vs. Het	30.24	27.75	2.482	0.8392	11	11	4.182	486
								Row 13
								WT vs. KO	28.53	31.02	-2.493	0.9145	8	11	3.856	486
								WT vs. Het	28.53	28.4	0.125	0.9145	8	11	0.1933	486
								KO vs. Het	31.02	28.4	2.618	0.8392	11	11	4.412	486
								Row 14
								WT vs. KO	29.18	31.25	-2.08	0.9145	8	11	3.216	486
								WT vs. Het	29.18	28.71	0.4659	0.9145	8	11	0.7205	486
								KO vs. Het	31.25	28.71	2.545	0.8392	11	11	4.29	486
								Row 15
								WT vs. KO	29.51	32.06	-2.551	0.9145	8	11	3.945	486
								WT vs. Het	29.51	29.33	0.1852	0.9145	8	11	0.2864	486
								KO vs. Het	32.06	29.33	2.736	0.8392	11	11	4.611	486
								Row 16
								WT vs. KO	29.94	32.19	-2.253	0.9145	8	11	3.485	486
								WT vs. Het	29.94	29.32	0.6193	0.9145	8	11	0.9577	486
								KO vs. Het	32.19	29.32	2.873	0.8392	11	11	4.841	486
								Row 17
								WT vs. KO	30.31	33.25	-2.942	0.9145	8	11	4.55	486
								WT vs. Het	30.31	30.42	-0.1057	0.9145	8	11	0.1634	486
								KO vs. Het	33.25	30.42	2.836	0.8392	11	11	4.78	486
								Row 18
								WT vs. KO	30.36	33.57	-3.21	0.9145	8	11	4.964	486
								WT vs. Het	30.36	30.56	-0.2011	0.9145	8	11	0.311	486
								KO vs. Het	33.57	30.56	3.009	0.8392	11	11	5.071	486

## Sheet: Statistics (female)
	Table Analyzed	Female						Within each row, compare columns (simple effects within rows)
	Two-way ANOVA	Ordinary						Number of families	18
	Alpha	0.05						Number of comparisons per family	3
								Alpha	0.05
	Source of Variation	% of total variation	P value	P value summary	Significant?
	Interaction	1.63	0.0022	**	Yes			Tukey's multiple comparisons test	Predicted (LS) mean diff.	95.00% CI of diff.	Below threshold?	Summary	Adjusted P Value
	Row Factor	79.88	<0.0001	****	Yes
	Column Factor	3.69	<0.0001	****	Yes			3 week
								WT vs. KO	0.1	-1.337 to 1.537	No	ns	0.9853
	ANOVA table	SS (Type III)	DF	MS	F (DFn, DFd)	P value		WT vs. Het	0.1	-1.549 to 1.749	No	ns	0.9888
	Interaction	102.7	34	3.022	F (34, 342) = 1.915	P=0.0022		KO vs. Het	7.105e-15	-1.686 to 1.686	No	ns	>0.9999
	Row Factor	5036	17	296.2	F (17, 342) = 187.7	P<0.0001
	Column Factor	232.6	2	116.3	F (2, 342) = 73.71	P<0.0001		4 week
	Residual	539.7	342	1.578				WT vs. KO	0.4903	-0.9467 to 1.927	No	ns	0.7013
								WT vs. Het	0.1178	-1.532 to 1.767	No	ns	0.9845
	Data summary							KO vs. Het	-0.3725	-2.058 to 1.313	No	ns	0.8616
	Number of columns (Column Factor)	3
	Number of rows (Row Factor)	18						5 week
	Number of values	396						WT vs. KO	0.05	-1.387 to 1.487	No	ns	0.9963
								WT vs. Het	0.16	-1.489 to 1.809	No	ns	0.9717
								KO vs. Het	0.11	-1.576 to 1.796	No	ns	0.9871
								6 week
								WT vs. KO	-0.825	-2.262 to 0.6119	No	ns	0.3678
								WT vs. Het	0.06	-1.589 to 1.709	No	ns	0.996
								KO vs. Het	0.885	-0.8009 to 2.571	No	ns	0.4329
								7 week
								WT vs. KO	-1.011	-2.448 to 0.4258	No	ns	0.2237
								WT vs. Het	-0.1711	-1.821 to 1.478	No	ns	0.9677
								KO vs. Het	0.84	-0.8459 to 2.526	No	ns	0.4702
								8 week
								WT vs. KO	-1.035	-2.472 to 0.4022	No	ns	0.2085
								WT vs. Het	0.05778	-1.592 to 1.707	No	ns	0.9963
								KO vs. Het	1.093	-0.5934 to 2.778	No	ns	0.2802
								9 week
								WT vs. KO	-1.16	-2.597 to 0.2772	No	ns	0.1403
								WT vs. Het	-0.04222	-1.692 to 1.607	No	ns	0.998
								KO vs. Het	1.118	-0.5684 to 2.803	No	ns	0.2643
								10 week
								WT vs. KO	-1.513	-2.949 to -0.07557	Yes	*	0.0364
								WT vs. Het	-0.14	-1.789 to 1.509	No	ns	0.9782
								KO vs. Het	1.373	-0.3134 to 3.058	No	ns	0.1356
								11 week
								WT vs. KO	-1.826	-3.263 to -0.3895	Yes	**	0.0083
								WT vs. Het	0.3111	-1.338 to 1.961	No	ns	0.8971
								KO vs. Het	2.138	0.4516 to 3.823	Yes	**	0.0085
								12 week
								WT vs. KO	-1.625	-3.062 to -0.1881	Yes	*	0.0221
								WT vs. Het	-0.2	-1.849 to 1.449	No	ns	0.9561
								KO vs. Het	1.425	-0.2609 to 3.111	No	ns	0.1163
								13 week
								WT vs. KO	-1.681	-3.117 to -0.2436	Yes	*	0.0171
								WT vs. Het	0.1844	-1.465 to 1.834	No	ns	0.9625
								KO vs. Het	1.865	0.1791 to 3.551	Yes	*	0.026
								14 week
								WT vs. KO	-2.061	-3.498 to -0.6242	Yes	**	0.0024
								WT vs. Het	-0.03111	-1.681 to 1.618	No	ns	0.9989
								KO vs. Het	2.03	0.3441 to 3.716	Yes	*	0.0135
								15 week
								WT vs. KO	-2.082	-3.519 to -0.6450	Yes	**	0.0021
								WT vs. Het	0.1556	-1.494 to 1.805	No	ns	0.9732
								KO vs. Het	2.238	0.5516 to 3.923	Yes	**	0.0055
								16 week
								WT vs. KO	-2.639	-4.076 to -1.202	Yes	****	<0.0001
								WT vs. Het	-0.06889	-1.718 to 1.581	No	ns	0.9947
								KO vs. Het	2.57	0.8841 to 4.256	Yes	**	0.0011
								17 week
								WT vs. KO	-2.861	-4.298 to -1.424	Yes	****	<0.0001
								WT vs. Het	-0.2711	-1.921 to 1.378	No	ns	0.9208
								KO vs. Het	2.59	0.9041 to 4.276	Yes	***	0.001
								18 week
								WT vs. KO	-3.072	-4.509 to -1.635	Yes	****	<0.0001
								WT vs. Het	-0.2022	-1.852 to 1.447	No	ns	0.9551
								KO vs. Het	2.87	1.184 to 4.556	Yes	***	0.0002
								19 week
								WT vs. KO	-3.34	-4.777 to -1.903	Yes	****	<0.0001
								WT vs. Het	-0.4378	-2.087 to 1.212	No	ns	0.8066
								KO vs. Het	2.903	1.217 to 4.588	Yes	***	0.0002
								20 week
								WT vs. KO	-2.8	-4.237 to -1.363	Yes	****	<0.0001
								WT vs. Het	-0.18	-1.829 to 1.469	No	ns	0.9643
								KO vs. Het	2.62	0.9341 to 4.306	Yes	***	0.0009
								Test details	Predicted (LS) mean 1	Predicted (LS) mean 2	Predicted (LS) mean diff.	SE of diff.	N1	N2	q	DF
								Row 1
								WT vs. KO	8.4	8.3	0.1	0.6104	9	8	0.2317	342
								WT vs. Het	8.4	8.3	0.1	0.7007	9	5	0.2018	342
								KO vs. Het	8.3	8.3	7.105e-15	0.7162	8	5	1.403e-14	342
								Row 2
								WT vs. KO	12.88	12.39	0.4903	0.6104	9	8	1.136	342
								WT vs. Het	12.88	12.76	0.1178	0.7007	9	5	0.2377	342
								KO vs. Het	12.39	12.76	-0.3725	0.7162	8	5	0.7356	342
								Row 3
								WT vs. KO	16.6	16.55	0.05	0.6104	9	8	0.1158	342
								WT vs. Het	16.6	16.44	0.16	0.7007	9	5	0.3229	342
								KO vs. Het	16.55	16.44	0.11	0.7162	8	5	0.2172	342
								Row 4
								WT vs. KO	17.1	17.93	-0.825	0.6104	9	8	1.911	342
								WT vs. Het	17.1	17.04	0.06	0.7007	9	5	0.1211	342
								KO vs. Het	17.93	17.04	0.885	0.7162	8	5	1.748	342
								Row 5
								WT vs. KO	17.39	18.4	-1.011	0.6104	9	8	2.342	342
								WT vs. Het	17.39	17.56	-0.1711	0.7007	9	5	0.3453	342
								KO vs. Het	18.4	17.56	0.84	0.7162	8	5	1.659	342
								Row 6
								WT vs. KO	17.78	18.81	-1.035	0.6104	9	8	2.397	342
								WT vs. Het	17.78	17.72	0.05778	0.7007	9	5	0.1166	342
								KO vs. Het	18.81	17.72	1.093	0.7162	8	5	2.157	342
								Row 7
								WT vs. KO	18.28	19.44	-1.16	0.6104	9	8	2.687	342
								WT vs. Het	18.28	18.32	-0.04222	0.7007	9	5	0.08522	342
								KO vs. Het	19.44	18.32	1.118	0.7162	8	5	2.207	342
								Row 8
								WT vs. KO	19.1	20.61	-1.513	0.6104	9	8	3.504	342
								WT vs. Het	19.1	19.24	-0.14	0.7007	9	5	0.2826	342
								KO vs. Het	20.61	19.24	1.373	0.7162	8	5	2.71	342
								Row 9
								WT vs. KO	19.81	21.64	-1.826	0.6104	9	8	4.231	342
								WT vs. Het	19.81	19.5	0.3111	0.7007	9	5	0.6279	342
								KO vs. Het	21.64	19.5	2.138	0.7162	8	5	4.221	342
								Row 10
								WT vs. KO	19.5	21.13	-1.625	0.6104	9	8	3.765	342
								WT vs. Het	19.5	19.7	-0.2	0.7007	9	5	0.4037	342
								KO vs. Het	21.13	19.7	1.425	0.7162	8	5	2.814	342
								Row 11
								WT vs. KO	20.24	21.93	-1.681	0.6104	9	8	3.893	342
								WT vs. Het	20.24	20.06	0.1844	0.7007	9	5	0.3723	342
								KO vs. Het	21.93	20.06	1.865	0.7162	8	5	3.683	342
								Row 12
								WT vs. KO	20.49	22.55	-2.061	0.6104	9	8	4.775	342
								WT vs. Het	20.49	20.52	-0.03111	0.7007	9	5	0.06279	342
								KO vs. Het	22.55	20.52	2.03	0.7162	8	5	4.009	342
								Row 13
								WT vs. KO	20.96	23.04	-2.082	0.6104	9	8	4.823	342
								WT vs. Het	20.96	20.8	0.1556	0.7007	9	5	0.314	342
								KO vs. Het	23.04	20.8	2.238	0.7162	8	5	4.418	342
								Row 14
								WT vs. KO	21.11	23.75	-2.639	0.6104	9	8	6.114	342
								WT vs. Het	21.11	21.18	-0.06889	0.7007	9	5	0.139	342
								KO vs. Het	23.75	21.18	2.57	0.7162	8	5	5.075	342
								Row 15
								WT vs. KO	21.29	24.15	-2.861	0.6104	9	8	6.628	342
								WT vs. Het	21.29	21.56	-0.2711	0.7007	9	5	0.5472	342
								KO vs. Het	24.15	21.56	2.59	0.7162	8	5	5.114	342
								Row 16
								WT vs. KO	21.28	24.35	-3.072	0.6104	9	8	7.118	342
								WT vs. Het	21.28	21.48	-0.2022	0.7007	9	5	0.4081	342
								KO vs. Het	24.35	21.48	2.87	0.7162	8	5	5.667	342
								Row 17
								WT vs. KO	21.52	24.86	-3.34	0.6104	9	8	7.739	342
								WT vs. Het	21.52	21.96	-0.4378	0.7007	9	5	0.8836	342
								KO vs. Het	24.86	21.96	2.903	0.7162	8	5	5.731	342
								Row 18
								WT vs. KO	22	24.8	-2.8	0.6104	9	8	6.487	342
								WT vs. Het	22	22.18	-0.18	0.7007	9	5	0.3633	342
								KO vs. Het	24.8	22.18	2.62	0.7162	8	5	5.174	342
