# Supplementary material for: Myristoylated Neuronal Calcium Sensor-1 captures the preciliary vesicle at distal appendages
Source: eLife. 2025 Jan 30;14:e85998. doi: 10.7554/eLife.85998 (PMC11984960; doi:10.7554/eLife.85998)
Supplement: Figure 8—source data 3. [file elife-85998-fig8-data3.xlsx]

## Sheet: Raw data
		DOB	Mother	Father	Genotype	Body weight	Inguinal fat	epididymal fat
157	M	2019-07-23	NCS1 #HF1	NCS1 #HM3	Het	28.3	0.411	0.5992
158	M	2019-07-23	NCS1 #HF1	NCS1 #HM3	KO	33.8	0.5	1.001
159	M	2019-07-23	NCS1 #HF1	NCS1 #HM3	Het	30	0.3684	0.7429
165	M	2019-07-23	NCS1 #HF7	NCS1 #HM6	Het	30.5	0.2976	0.5795
166	M	2019-07-23	NCS1 #HF7	NCS1 #HM6	Het	32.6	0.3203	0.8823
167	M	2019-07-23	NCS1 #HF7	NCS1 #HM6	Het	33.1	0.43	0.967
168	M	2019-07-23	NCS1 #HF7	NCS1 #HM6	KO	35	0.7319	1.2185
182	M	2019-07-26	NCS1 #HF2	NCS1 #HM4	KO	35	0.6031	1.119
183	M	2019-07-26	NCS1 #HF2	NCS1 #HM4	KO	36.1	0.8805	1.1046
Hetero			Body weight	Inguinal fat	epididymal fat
157	M	Het	28.3	0.411	0.5992
159	M	Het	30	0.3684	0.7429
165	M	Het	30.5	0.2976	0.5795
166	M	Het	32.6	0.3203	0.8823
167	M	Het	33.1	0.43	0.967
		Average	30.9	0.36546	0.75418
		S.D.	1.96596	0.0567722	0.170562
		S.E.M	0.879204	0.0253893	0.0762779
KO
158	M	KO	33.8	0.5	1.001
168	M	KO	35	0.7319	1.2185
182	M	KO	35	0.6031	1.119
183	M	KO	36.1	0.8805	1.1046
		Average	34.975	0.678875	1.11077
		S.D.	0.939415	0.164522	0.0889963
		S.E.M	0.469707	0.082261	0.0444981

## Sheet: Statistics
	Table Analyzed	Inguinal fat
					Table Analyzed	Epididymal fat
	Column B	KO
	vs.	vs.			Column B	Data Set-B
	Column A	Het			vs.	vs.
					Column A	Data Set-A
	Unpaired t test with Welch's correction
	P value	0.0266			Unpaired t test with Welch's correction
	P value summary	*			P value	0.0063
	Significantly different (P < 0.05)?	Yes			P value summary	**
	One- or two-tailed P value?	Two-tailed			Significantly different (P < 0.05)?	Yes
	Welch-corrected t, df	t=3.641, df=3.574			One- or two-tailed P value?	Two-tailed
					Welch-corrected t, df	t=4.038, df=6.225
	How big is the difference?
	Mean of column A	0.3655			How big is the difference?
	Mean of column B	0.6789			Mean of column A	0.7542
	Difference between means (B - A) ± SEM	0.3134 ± 0.08609			Mean of column B	1.111
	95% confidence interval	0.06274 to 0.5641			Difference between means (B - A) ± SEM	0.3566 ± 0.08831
	R squared (eta squared)	0.7876			95% confidence interval	0.1424 to 0.5708
					R squared (eta squared)	0.7237
	F test to compare variances
	F, DFn, Dfd	8.398, 3, 4			F test to compare variances
	P value	0.0671			F, DFn, Dfd	3.673, 4, 3
	P value summary	ns			P value	0.3136
	Significantly different (P < 0.05)?	No			P value summary	ns
					Significantly different (P < 0.05)?	No
	Data analyzed
	Sample size, column A	5			Data analyzed
	Sample size, column B	4			Sample size, column A	5
					Sample size, column B	4
