# Supplementary material for: Myristoylated Neuronal Calcium Sensor-1 captures the preciliary vesicle at distal appendages
Source: eLife. 2025 Jan 30;14:e85998. doi: 10.7554/eLife.85998 (PMC11984960; doi:10.7554/eLife.85998)
Supplement: Figure 8—source data 4. [file elife-85998-fig8-data4.xlsx]

## Sheet: Sheet1
Number	Sex	DOB	Father	Mother	Genotype	Age
Figure 8E
38	F	2019-05-13	NCS1 #6	NCS1 #HM6	WT	50 week old
39	F	2019-05-13	NCS1 #6	NCS1 #HM6	WT	50 week old
53	F	2019-05-14	NCS1 #13	5318	WT	50 week old	Shown in Figure 8E
54	F	2019-05-14	NCS1 #13	5318	KO	50 week old	Shown in Figure 8E
68	M	2019-05-16	NCS1 #HF3	NCS1 #HM3	WT	50 week old
69	M	2019-05-16	NCS1 #HF3	NCS1 #HM3	KO	50 week old
76	M	2019-05-16	NCS1 #HF4	NCS1 #HM4	KO	50 week old
77	M	2019-05-16	NCS1 #HF4	NCS1 #HM4	WT	50 week old
81	F	2019-05-16	NCS1 #HF4	NCS1 #HM4	KO	50 week old
82	F	2019-05-16	NCS1 #HF4	NCS1 #HM4	KO	50 week old
Figure 8G
38	F	2019-05-13	NCS1 #6	NCS1 #HM6	WT	50 week old
39	F	2019-05-13	NCS1 #6	NCS1 #HM6	WT	50 week old
53	F	2019-05-14	NCS1 #13	5318	WT	50 week old	Shown in Figure 8G
54	F	2019-05-14	NCS1 #13	5318	KO	50 week old	Shown in Figure 8G
68	M	2019-05-16	NCS1 #HF3	NCS1 #HM3	WT	50 week old
69	M	2019-05-16	NCS1 #HF3	NCS1 #HM3	KO	50 week old
76	M	2019-05-16	NCS1 #HF4	NCS1 #HM4	KO	50 week old
77	M	2019-05-16	NCS1 #HF4	NCS1 #HM4	WT	50 week old
81	F	2019-05-16	NCS1 #HF4	NCS1 #HM4	KO	50 week old
82	F	2019-05-16	NCS1 #HF4	NCS1 #HM4	KO	50 week old
Figure 8H
35	M	2019-05-13	NCS1 #6	NCS1 #HM6	WT	20 week old	Shown in Figure 8H
36	M	2019-05-13	NCS1 #6	NCS1 #HM6	KO	20 week old	Shown in Figure 8H
56	M	2019-05-16	NCS1 #HF1	NCS1 #HM1	WT	20 week old
57	M	2019-05-16	NCS1 #HF1	NCS1 #HM1	KO	20 week old
63	M	2019-05-16	NCS1 #HF2	NCS1 #HM2	KO	20 week old
64	M	2019-05-16	NCS1 #HF2	NCS1 #HM2	WT	20 week old
