# Supplementary material for: Myristoylated Neuronal Calcium Sensor-1 captures the preciliary vesicle at distal appendages
Source: eLife. 2025 Jan 30;14:e85998. doi: 10.7554/eLife.85998 (PMC11984960; doi:10.7554/eLife.85998)
Supplement: Figure 8—source data 5. [file elife-85998-fig8-data5.xlsx]

## Sheet: Mice used
Number	Sex	DOB	Father	Mother	Genotype
38	F	2019-05-13	NCS1 #6	NCS1 #HM6	WT
39	F	2019-05-13	NCS1 #6	NCS1 #HM6	WT
53	F	2019-05-14	NCS1 #13	5318	WT
54	F	2019-05-14	NCS1 #13	5318	KO
68	M	2019-05-16	NCS1 #HF3	NCS1 #HM3	WT
69	M	2019-05-16	NCS1 #HF3	NCS1 #HM3	KO
76	M	2019-05-16	NCS1 #HF4	NCS1 #HM4	KO
77	M	2019-05-16	NCS1 #HF4	NCS1 #HM4	WT
81	F	2019-05-16	NCS1 #HF4	NCS1 #HM4	KO
82	F	2019-05-16	NCS1 #HF4	NCS1 #HM4	KO

## Sheet: Raw data
#38			length (µm)
1	#38_10x_1_CH2.tif:0633-1190	-51.234	31.822	ONL	1.86957
2	#38_10x_1_CH2.tif:0662-1224	-43.21	17.021	INL
3	#38_10x_1_CH2.tif:0511-1289	-37.304	29.775	ONL	2.23034
4	#38_10x_1_CH2.tif:0536-1320	-32.347	13.35	INL
5	#38_10x_2_Overlay.tif:0731-0737	141.096	27.536	ONL	1.45763
6	#38_10x_2_Overlay.tif:0761-0790	-42.58	18.891	INL
7	#38_10x_2_Overlay.tif:0698-0770	144.719	32.544	ONL	1.64314
8	#38_10x_2_Overlay.tif:0735-0814	-38.32	19.806	INL
9	#38_10x_3_Overlay.tif:0820-0984	37.694	41.809	ONL	1.55303
10	#38_10x_3_Overlay.tif:0771-1043	35.91	26.921	INL
11	#38_10x_3_Overlay.tif:0776-0943	-132.979	45.219	ONL	1.73539
12	#38_10x_3_Overlay.tif:0730-1003	46.169	26.057	INL
13	#38_10x_4_Overlay.tif:0841-0603	58.241	37.14	ONL	1.7778
14	#38_10x_4_Overlay.tif:0800-0644	59.744	20.891	INL
15	#38_10x_4_Overlay.tif:0929-0889	-88.854	37.602	ONL	2.27326
16	#38_10x_4_Overlay.tif:0873-0873	-90	16.541	INL
				Average	1.81752
				SEM	0.0953275
#39
1	#39_10x_01_Overlay.tif:0402-1285	-53.915	27.446	ONL	1.93937
2	#39_10x_01_Overlay.tif:0440-1305	-50.389	14.152	INL
3	#39_10x_01_Overlay.tif:1259-0811	-46.005	30.309	ONL	1.69703
4	#39_10x_01_Overlay.tif:1293-0855	-40.732	17.86	INL
5	#39_10x_02_Overlay.tif:1046-0833	-16.975	37.341	ONL	2.01332
6	#39_10x_02_Overlay.tif:1045-0888	-17.7	18.547	INL
7	#39_10x_02_Overlay.tif:1408-0749	-6.911	33.325	ONL	1.9821
8	#39_10x_02_Overlay.tif:1389-0800	-10.305	16.813	INL
9	#39_10x_03_Overlay.tif:0165-0376	21.448	33.928	ONL	1.78474
10	#39_10x_03_Overlay.tif:0144-0423	24.538	19.01	INL
11	#39_10x_03_Overlay.tif:1089-1265	-133.264	35.106	ONL	2.1988
12	#39_10x_03_Overlay.tif:1043-1287	47.545	15.966	INL
13	#39_10x_04_Overlay.tif:0873-1091	50.013	30.421	ONL	2.15568
14	#39_10x_04_Overlay.tif:0834-1112	41.76	14.112	INL
15	#39_10x_04_Overlay.tif:0142-0090	46.685	36.168	ONL	2.12179
16	#39_10x_04_Overlay.tif:0102-0120	48.576	17.046	INL
				Average	1.9866
				SEM	0.0687588
#53
1	#53_10x_01_Overlay.tif:0680-1187	59.3	27.982	ONL	2.23606
2	#53_10x_01_Overlay.tif:0709-1136	-122.735	12.514	INL
3	#53_10x_01_Overlay.tif:0876-1745	-95.751	35.013	ONL	2.43738
4	#53_10x_01_Overlay.tif:0935-1727	-96.009	14.365	INL
5	#53_10x_02_Overlay.tif:0881-1366	-153.435	29.422	ONL	1.71437
6	#53_10x_02_Overlay.tif:0893-1323	-151.189	17.162	INL
7	#53_10x_02_Overlay.tif:1358-1529	-161.03	33.923	ONL	1.51246
8	#53_10x_02_Overlay.tif:1366-1469	-161.768	22.429	INL
9	#53_10x_03_Overlay.tif:0507-1257	-172.147	33.016	ONL	1.81977
10	#53_10x_03_Overlay.tif:0511-1206	-174.053	18.143	INL
11	#53_10x_03_Overlay.tif:1389-1134	161.03	38.163	ONL	2.15403
12	#53_10x_03_Overlay.tif:1362-1089	-17.281	17.717	INL
13	#53_10x_04_Overlay.tif:0988-1253	-90	31.579	ONL	1.99943
14	#53_10x_04_Overlay.tif:0934-1247	-91.364	15.794	INL
15	#53_10x_04_Overlay.tif:0854-1790	-62.879	34.635	ONL	1.54455
16	#53_10x_04_Overlay.tif:0809-1744	-62.003	22.424	INL
				Average	1.92726
				SEM	0.121521
#54
1	#54_10x_01_Overlay.tif:1130-0919	167.255	32.377	ONL	1.82952
2	#54_10x_01_Overlay.tif:1131-0967	167.735	17.697	INL
3	#54_10x_01_Overlay.tif:0960-0939	172.147	33.016	ONL	1.70124
4	#54_10x_01_Overlay.tif:0962-0989	171.085	19.407	INL
5	#54_10x_02_Overlay.tif:0554-0764	4.764	31.688	ONL	1.61024
6	#54_10x_02_Overlay.tif:0551-0816	6.582	19.679	INL
7	#54_10x_02_Overlay.tif:0059-0786	-9.782	33.189	ONL	1.77529
8	#54_10x_02_Overlay.tif:0061-0837	-15.154	18.695	INL
9	#54_10x_03_Overlay.tif:0716-0099	-136.236	36.959	ONL	1.72932
10	#54_10x_03_Overlay.tif:0666-0128	-140.711	21.372	INL
11	#54_10x_03_Overlay.tif:0788-1470	-71.952	35.19	ONL	1.75127
12	#54_10x_03_Overlay.tif:0737-1446	-72.582	20.094	INL
13	#54_10x_04_Overlay.tif:1139-0471	-56.489	33.366	ONL	2.23783
14	#54_10x_04_Overlay.tif:1112-0426	-56.31	14.91	INL
15	#54_10x_04_Overlay.tif:1375-0146	-74.11	35.7	ONL	1.80833
16	#54_10x_04_Overlay.tif:1321-0136	-69.955	19.742	INL
				Average	1.80538
				SEM	0.0765527
#68
1	#68_10x_01_Overlay.tif:0349-1179	-98.207	39.502	ONL	1.90261
2	#68_10x_01_Overlay.tif:0404-1157	-95.194	20.762	INL
3	#68_10x_01_Overlay.tif:0396-1327	-104.808	33.83	ONL	1.57848
4	#68_10x_01_Overlay.tif:0445-1306	-105.255	21.432	INL
5	#68_10x_02_Overlay.tif:0833-0424	-30.651	35.396	ONL	1.69822
6	#68_10x_02_Overlay.tif:0850-0475	-39.144	20.843	INL
7	#68_10x_02_Overlay.tif:1372-0216	-24.624	33.084	ONL	1.76363
8	#68_10x_02_Overlay.tif:1375-0271	-22.797	18.759	INL
9	#68_10x_03_Overlay.tif:0869-0671	-9.841	37.392	ONL	1.86085
10	#68_10x_03_Overlay.tif:0871-0726	-17.418	20.094	INL
11	#68_10x_03_Overlay.tif:1187-0647	2.946	34.13	ONL	1.64023
12	#68_10x_03_Overlay.tif:1170-0701	1.38	20.808	INL
13	#68_10x_04_Overlay.tif:0309-0295	7.792	36.047	ONL	1.7362
14	#68_10x_04_Overlay.tif:0296-0349	5.194	20.762	INL
15	#68_10x_04_Overlay.tif:0054-0298	-3.13	32.128	ONL	1.43807
16	#68_10x_04_Overlay.tif:0056-0350	-3.215	22.341	INL
				Average	1.70229
				SEM	0.0434818
1	#69_10x_01_Overlay.tif:0403-1255	-52.481	26.543	ONL	1.95442
2	#69_10x_01_Overlay.tif:0464-1246	-48.366	13.581	INL
3	#69_10x_01_Overlay.tif:0805-0738	-36.87	37.594	ONL	1.72465
4	#69_10x_01_Overlay.tif:0839-0786	-32.32	21.798	INL
5	#69_10x_02_Overlay.tif:0049-0699	-21.915	35.254	ONL	1.58852
6	#69_10x_02_Overlay.tif:0078-0756	-26.131	22.193	INL
7	#69_10x_02_Overlay.tif:0470-0636	5.877	34.265	ONL	1.77493
8	#69_10x_02_Overlay.tif:0443-0690	1.488	19.305	INL
9	#69_10x_03_Overlay.tif:1393-1468	-119.055	38.705	ONL	1.83732
10	#69_10x_03_Overlay.tif:1330-1481	-124.824	21.066	INL
11	#69_10x_03_Overlay.tif:1412-1503	-121.159	37.781	ONL	1.96643
12	#69_10x_03_Overlay.tif:1365-1536	-120.579	19.213	INL
13	#69_10x_04_Overlay.tif:0891-0212	-120.141	40.429	ONL	1.72714
14	#69_10x_04_Overlay.tif:0834-0234	-119.859	23.408	INL
15	#69_10x_04_Overlay.tif:0963-1637	-78.158	31.754	ONL	2.01204
16	#69_10x_04_Overlay.tif:0923-1622	-79.939	15.782	INL
				Average	1.82318
				SEM	0.0509842
1	#76_10x_01_CH2.tif:0846-0874	-104.191	33.736	ONL	1.96334
2	#76_10x_01_CH2.tif:0792-0869	-100.081	17.183	INL
3	#76_10x_01_CH2.tif:1159-1701	-113.728	37.37	ONL	1.77252
4	#76_10x_01_CH2.tif:1092-1698	-111.991	21.083	INL
5	#76_10x_02_CH2.tif:0520-1216	-25.71	33.797	ONL	1.6737
6	#76_10x_02_CH2.tif:0514-1162	-24.179	20.193	INL
7	#76_10x_02_CH2.tif:1136-0680	-75.689	38.022	ONL	1.86849
8	#76_10x_02_CH2.tif:1078-0671	-78.275	20.349	INL
9	#76_10x_03_Overlay.tif:1093-1238	-24.981	36.497	ONL	1.72237
10	#76_10x_03_Overlay.tif:1071-1189	-25.201	21.19	INL
11	#76_10x_03_Overlay.tif:0108-1520	26.565	35.306	ONL	1.60285
12	#76_10x_03_Overlay.tif:0126-1468	27.44	22.027	INL
13	#76_10x_04_Overlay.tif:1097-1579	31.734	33.594	ONL	2.07755
14	#76_10x_04_Overlay.tif:1125-1542	35.538	16.17	INL
15	#76_10x_04_Overlay.tif:1218-1680	31.185	33.397	ONL	1.65046
16	#76_10x_04_Overlay.tif:1221-1621	35.166	20.235	INL
				Average	1.79141
				SEM	0.0634472
1	#77_10x_01_Overlay.tif:0588-0603	-92.862	30.113	ONL	2.50316
2	#77_10x_01_Overlay.tif:0552-0606	-90	12.03	INL
3	#77_10x_01_Overlay.tif:1210-1410	-80.67	35.558	ONL	1.60388
4	#77_10x_01_Overlay.tif:1159-1385	-79.579	22.17	INL
5	#77_10x_02_Overlay.tif:0775-1232	-14.769	42.766	ONL	1.89885
6	#77_10x_02_Overlay.tif:0765-1165	-14.5	22.522	INL
7	#77_10x_02_Overlay.tif:0257-1360	-21.93	41.607	ONL	1.63736
8	#77_10x_02_Overlay.tif:0231-1302	-22.011	25.411	INL
9	#77_10x_03_Overlay.tif:1056-1101	-18.726	46.84	ONL	1.76681
10	#77_10x_03_Overlay.tif:1035-1042	-18.178	26.511	INL
11	#77_10x_03_Overlay.tif:0532-1369	-43.078	39.631	ONL	1.44191
12	#77_10x_03_Overlay.tif:0488-1325	-40.006	27.485	INL
13	#77_10x_04_Overlay.tif:0670-1317	39.289	26.716	ONL	1.7844
14	#77_10x_04_Overlay.tif:0691-1283	38.884	14.972	INL
15	#77_10x_04_Overlay.tif:1196-1694	-111.801	35.091	ONL	1.50903
16	#77_10x_04_Overlay.tif:1256-1664	-120.434	23.254	INL
				Average	1.76818
				SEM	0.128961
1	#81_10x_01_Overlay.tif:0755-1036	-91.614	26.702	ONL	2.43631
2	#81_10x_01_Overlay.tif:0792-1026	-95.906	10.96	INL
3	#81_10x_01_Overlay.tif:1001-1800	-119.055	27.094	ONL	1.8035
4	#81_10x_01_Overlay.tif:1032-1776	-121.701	15.023	INL
5	#81_10x_02_Overlay.tif:0421-0808	-120.141	26.953	ONL	1.77043
6	#81_10x_02_Overlay.tif:0472-0811	-122.905	15.224	INL
7	#81_10x_02_Overlay.tif:0701-1286	-105.068	30.367	ONL	1.9796
8	#81_10x_02_Overlay.tif:0746-1275	-107.103	15.34	INL
9	#81_10x_03_Overlay.tif:0915-1079	-45	34.381	ONL	1.6702
10	#81_10x_03_Overlay.tif:0874-1042	-47.961	20.585	INL
11	#81_10x_03_Overlay.tif:0205-1234	15.173	30.642	ONL	1.82252
12	#81_10x_03_Overlay.tif:0214-1187	10.305	16.813	INL
13	#81_10x_04_Overlay.tif:0601-1337	-49.254	32.254	ONL	1.86117
14	#81_10x_04_Overlay.tif:0576-1291	-40.601	17.33	INL
15	#81_10x_04_Overlay.tif:0147-1653	-35.096	34.001	ONL	1.74373
16	#81_10x_04_Overlay.tif:0125-1603	-37.164	19.499	INL
				Average	1.88593
				SEM	0.0951336
1	#82_10x_01_Overlay.tif:0984-1298	-134.519	31.635	ONL	1.82545
2	#82_10x_01_Overlay.tif:1023-1264	-139.399	17.33	INL
3	#82_10x_01_Overlay.tif:1273-1517	-144.888	29.412	ONL	1.7613
4	#82_10x_01_Overlay.tif:1286-1473	-148.815	16.699	INL
5	#82_10x_02_Overlay.tif:1053-0859	-26.274	33.121	ONL	1.47309
6	#82_10x_02_Overlay.tif:0995-0827	-20.556	22.484	INL
7	#82_10x_02_Overlay.tif:1360-0745	-17.916	35.032	ONL	1.46332
8	#82_10x_02_Overlay.tif:1333-0690	-19.573	23.94	INL
9	#82_10x_03_Overlay.tif:0401-1221	-21.318	33.091	ONL	1.55481
10	#82_10x_03_Overlay.tif:0389-1162	-17.475	21.283	INL
11	#82_10x_03_Overlay.tif:1384-0503	-81.448	33.708	ONL	1.98049
12	#82_10x_03_Overlay.tif:1330-0515	-76.373	17.02	INL
13	#82_10x_04_Overlay.tif:0872-1163	-94.399	39.213	ONL	1.6298
14	#82_10x_04_Overlay.tif:0820-1254	-90	24.06	INL
15	#82_10x_04_Overlay.tif:0865-1766	-84.289	37.781	ONL	1.92691
16	#82_10x_04_Overlay.tif:0809-1753	-85.601	19.607	INL
				Average	1.7019
				SEM	0.0732377

## Sheet: Organized
WT							KO
#38			length (µm)				#54
1	#38_10x_1_CH2.tif:0633-1190	-51.234	31.822	ONL	1.86957		1	#54_10x_01_Overlay.tif:1130-0919	167.255	32.377	ONL	1.82952
2	#38_10x_1_CH2.tif:0662-1224	-43.21	17.021	INL			2	#54_10x_01_Overlay.tif:1131-0967	167.735	17.697	INL
3	#38_10x_1_CH2.tif:0511-1289	-37.304	29.775	ONL	2.23034		3	#54_10x_01_Overlay.tif:0960-0939	172.147	33.016	ONL	1.70124
4	#38_10x_1_CH2.tif:0536-1320	-32.347	13.35	INL			4	#54_10x_01_Overlay.tif:0962-0989	171.085	19.407	INL
5	#38_10x_2_Overlay.tif:0731-0737	141.096	27.536	ONL	1.45763		5	#54_10x_02_Overlay.tif:0554-0764	4.764	31.688	ONL	1.61024
6	#38_10x_2_Overlay.tif:0761-0790	-42.58	18.891	INL			6	#54_10x_02_Overlay.tif:0551-0816	6.582	19.679	INL
7	#38_10x_2_Overlay.tif:0698-0770	144.719	32.544	ONL	1.64314		7	#54_10x_02_Overlay.tif:0059-0786	-9.782	33.189	ONL	1.77529
8	#38_10x_2_Overlay.tif:0735-0814	-38.32	19.806	INL			8	#54_10x_02_Overlay.tif:0061-0837	-15.154	18.695	INL
9	#38_10x_3_Overlay.tif:0820-0984	37.694	41.809	ONL	1.55303		9	#54_10x_03_Overlay.tif:0716-0099	-136.236	36.959	ONL	1.72932
10	#38_10x_3_Overlay.tif:0771-1043	35.91	26.921	INL			10	#54_10x_03_Overlay.tif:0666-0128	-140.711	21.372	INL
11	#38_10x_3_Overlay.tif:0776-0943	-132.979	45.219	ONL	1.73539		11	#54_10x_03_Overlay.tif:0788-1470	-71.952	35.19	ONL	1.75127
12	#38_10x_3_Overlay.tif:0730-1003	46.169	26.057	INL			12	#54_10x_03_Overlay.tif:0737-1446	-72.582	20.094	INL
13	#38_10x_4_Overlay.tif:0841-0603	58.241	37.14	ONL	1.7778		13	#54_10x_04_Overlay.tif:1139-0471	-56.489	33.366	ONL	2.23783
14	#38_10x_4_Overlay.tif:0800-0644	59.744	20.891	INL			14	#54_10x_04_Overlay.tif:1112-0426	-56.31	14.91	INL
15	#38_10x_4_Overlay.tif:0929-0889	-88.854	37.602	ONL	2.27326		15	#54_10x_04_Overlay.tif:1375-0146	-74.11	35.7	ONL	1.80833
16	#38_10x_4_Overlay.tif:0873-0873	-90	16.541	INL			16	#54_10x_04_Overlay.tif:1321-0136	-69.955	19.742	INL
				Average	1.81752						Average	1.80538
				SEM	0.0953275						SEM	0.0765527
#39
1	#39_10x_01_Overlay.tif:0402-1285	-53.915	27.446	ONL	1.93937		1	#69_10x_01_Overlay.tif:0403-1255	-52.481	26.543	ONL	1.95442
2	#39_10x_01_Overlay.tif:0440-1305	-50.389	14.152	INL			2	#69_10x_01_Overlay.tif:0464-1246	-48.366	13.581	INL
3	#39_10x_01_Overlay.tif:1259-0811	-46.005	30.309	ONL	1.69703		3	#69_10x_01_Overlay.tif:0805-0738	-36.87	37.594	ONL	1.72465
4	#39_10x_01_Overlay.tif:1293-0855	-40.732	17.86	INL			4	#69_10x_01_Overlay.tif:0839-0786	-32.32	21.798	INL
5	#39_10x_02_Overlay.tif:1046-0833	-16.975	37.341	ONL	2.01332		5	#69_10x_02_Overlay.tif:0049-0699	-21.915	35.254	ONL	1.58852
6	#39_10x_02_Overlay.tif:1045-0888	-17.7	18.547	INL			6	#69_10x_02_Overlay.tif:0078-0756	-26.131	22.193	INL
7	#39_10x_02_Overlay.tif:1408-0749	-6.911	33.325	ONL	1.9821		7	#69_10x_02_Overlay.tif:0470-0636	5.877	34.265	ONL	1.77493
8	#39_10x_02_Overlay.tif:1389-0800	-10.305	16.813	INL			8	#69_10x_02_Overlay.tif:0443-0690	1.488	19.305	INL
9	#39_10x_03_Overlay.tif:0165-0376	21.448	33.928	ONL	1.78474		9	#69_10x_03_Overlay.tif:1393-1468	-119.055	38.705	ONL	1.83732
10	#39_10x_03_Overlay.tif:0144-0423	24.538	19.01	INL			10	#69_10x_03_Overlay.tif:1330-1481	-124.824	21.066	INL
11	#39_10x_03_Overlay.tif:1089-1265	-133.264	35.106	ONL	2.1988		11	#69_10x_03_Overlay.tif:1412-1503	-121.159	37.781	ONL	1.96643
12	#39_10x_03_Overlay.tif:1043-1287	47.545	15.966	INL			12	#69_10x_03_Overlay.tif:1365-1536	-120.579	19.213	INL
13	#39_10x_04_Overlay.tif:0873-1091	50.013	30.421	ONL	2.15568		13	#69_10x_04_Overlay.tif:0891-0212	-120.141	40.429	ONL	1.72714
14	#39_10x_04_Overlay.tif:0834-1112	41.76	14.112	INL			14	#69_10x_04_Overlay.tif:0834-0234	-119.859	23.408	INL
15	#39_10x_04_Overlay.tif:0142-0090	46.685	36.168	ONL	2.12179		15	#69_10x_04_Overlay.tif:0963-1637	-78.158	31.754	ONL	2.01204
16	#39_10x_04_Overlay.tif:0102-0120	48.576	17.046	INL			16	#69_10x_04_Overlay.tif:0923-1622	-79.939	15.782	INL
				Average	1.9866						Average	1.82318
				SEM	0.0687588						SEM	0.0509842
#53
1	#53_10x_01_Overlay.tif:0680-1187	59.3	27.982	ONL	2.23606		1	#76_10x_01_CH2.tif:0846-0874	-104.191	33.736	ONL	1.96334
2	#53_10x_01_Overlay.tif:0709-1136	-122.735	12.514	INL			2	#76_10x_01_CH2.tif:0792-0869	-100.081	17.183	INL
3	#53_10x_01_Overlay.tif:0876-1745	-95.751	35.013	ONL	2.43738		3	#76_10x_01_CH2.tif:1159-1701	-113.728	37.37	ONL	1.77252
4	#53_10x_01_Overlay.tif:0935-1727	-96.009	14.365	INL			4	#76_10x_01_CH2.tif:1092-1698	-111.991	21.083	INL
5	#53_10x_02_Overlay.tif:0881-1366	-153.435	29.422	ONL	1.71437		5	#76_10x_02_CH2.tif:0520-1216	-25.71	33.797	ONL	1.6737
6	#53_10x_02_Overlay.tif:0893-1323	-151.189	17.162	INL			6	#76_10x_02_CH2.tif:0514-1162	-24.179	20.193	INL
7	#53_10x_02_Overlay.tif:1358-1529	-161.03	33.923	ONL	1.51246		7	#76_10x_02_CH2.tif:1136-0680	-75.689	38.022	ONL	1.86849
8	#53_10x_02_Overlay.tif:1366-1469	-161.768	22.429	INL			8	#76_10x_02_CH2.tif:1078-0671	-78.275	20.349	INL
9	#53_10x_03_Overlay.tif:0507-1257	-172.147	33.016	ONL	1.81977		9	#76_10x_03_Overlay.tif:1093-1238	-24.981	36.497	ONL	1.72237
10	#53_10x_03_Overlay.tif:0511-1206	-174.053	18.143	INL			10	#76_10x_03_Overlay.tif:1071-1189	-25.201	21.19	INL
11	#53_10x_03_Overlay.tif:1389-1134	161.03	38.163	ONL	2.15403		11	#76_10x_03_Overlay.tif:0108-1520	26.565	35.306	ONL	1.60285
12	#53_10x_03_Overlay.tif:1362-1089	-17.281	17.717	INL			12	#76_10x_03_Overlay.tif:0126-1468	27.44	22.027	INL
13	#53_10x_04_Overlay.tif:0988-1253	-90	31.579	ONL	1.99943		13	#76_10x_04_Overlay.tif:1097-1579	31.734	33.594	ONL	2.07755
14	#53_10x_04_Overlay.tif:0934-1247	-91.364	15.794	INL			14	#76_10x_04_Overlay.tif:1125-1542	35.538	16.17	INL
15	#53_10x_04_Overlay.tif:0854-1790	-62.879	34.635	ONL	1.54455		15	#76_10x_04_Overlay.tif:1218-1680	31.185	33.397	ONL	1.65046
16	#53_10x_04_Overlay.tif:0809-1744	-62.003	22.424	INL			16	#76_10x_04_Overlay.tif:1221-1621	35.166	20.235	INL
				Average	1.92726						Average	1.79141
				SEM	0.121521						SEM	0.0634472
#68
1	#68_10x_01_Overlay.tif:0349-1179	-98.207	39.502	ONL	1.90261		1	#81_10x_01_Overlay.tif:0755-1036	-91.614	26.702	ONL	2.43631
2	#68_10x_01_Overlay.tif:0404-1157	-95.194	20.762	INL			2	#81_10x_01_Overlay.tif:0792-1026	-95.906	10.96	INL
3	#68_10x_01_Overlay.tif:0396-1327	-104.808	33.83	ONL	1.57848		3	#81_10x_01_Overlay.tif:1001-1800	-119.055	27.094	ONL	1.8035
4	#68_10x_01_Overlay.tif:0445-1306	-105.255	21.432	INL			4	#81_10x_01_Overlay.tif:1032-1776	-121.701	15.023	INL
5	#68_10x_02_Overlay.tif:0833-0424	-30.651	35.396	ONL	1.69822		5	#81_10x_02_Overlay.tif:0421-0808	-120.141	26.953	ONL	1.77043
6	#68_10x_02_Overlay.tif:0850-0475	-39.144	20.843	INL			6	#81_10x_02_Overlay.tif:0472-0811	-122.905	15.224	INL
7	#68_10x_02_Overlay.tif:1372-0216	-24.624	33.084	ONL	1.76363		7	#81_10x_02_Overlay.tif:0701-1286	-105.068	30.367	ONL	1.9796
8	#68_10x_02_Overlay.tif:1375-0271	-22.797	18.759	INL			8	#81_10x_02_Overlay.tif:0746-1275	-107.103	15.34	INL
9	#68_10x_03_Overlay.tif:0869-0671	-9.841	37.392	ONL	1.86085		9	#81_10x_03_Overlay.tif:0915-1079	-45	34.381	ONL	1.6702
10	#68_10x_03_Overlay.tif:0871-0726	-17.418	20.094	INL			10	#81_10x_03_Overlay.tif:0874-1042	-47.961	20.585	INL
11	#68_10x_03_Overlay.tif:1187-0647	2.946	34.13	ONL	1.64023		11	#81_10x_03_Overlay.tif:0205-1234	15.173	30.642	ONL	1.82252
12	#68_10x_03_Overlay.tif:1170-0701	1.38	20.808	INL			12	#81_10x_03_Overlay.tif:0214-1187	10.305	16.813	INL
13	#68_10x_04_Overlay.tif:0309-0295	7.792	36.047	ONL	1.7362		13	#81_10x_04_Overlay.tif:0601-1337	-49.254	32.254	ONL	1.86117
14	#68_10x_04_Overlay.tif:0296-0349	5.194	20.762	INL			14	#81_10x_04_Overlay.tif:0576-1291	-40.601	17.33	INL
15	#68_10x_04_Overlay.tif:0054-0298	-3.13	32.128	ONL	1.43807		15	#81_10x_04_Overlay.tif:0147-1653	-35.096	34.001	ONL	1.74373
16	#68_10x_04_Overlay.tif:0056-0350	-3.215	22.341	INL			16	#81_10x_04_Overlay.tif:0125-1603	-37.164	19.499	INL
				Average	1.70229						Average	1.88593
				SEM	0.0434818						SEM	0.0951336
1	#77_10x_01_Overlay.tif:0588-0603	-92.862	30.113	ONL	2.50316		1	#82_10x_01_Overlay.tif:0984-1298	-134.519	31.635	ONL	1.82545
2	#77_10x_01_Overlay.tif:0552-0606	-90	12.03	INL			2	#82_10x_01_Overlay.tif:1023-1264	-139.399	17.33	INL
3	#77_10x_01_Overlay.tif:1210-1410	-80.67	35.558	ONL	1.60388		3	#82_10x_01_Overlay.tif:1273-1517	-144.888	29.412	ONL	1.7613
4	#77_10x_01_Overlay.tif:1159-1385	-79.579	22.17	INL			4	#82_10x_01_Overlay.tif:1286-1473	-148.815	16.699	INL
5	#77_10x_02_Overlay.tif:0775-1232	-14.769	42.766	ONL	1.89885		5	#82_10x_02_Overlay.tif:1053-0859	-26.274	33.121	ONL	1.47309
6	#77_10x_02_Overlay.tif:0765-1165	-14.5	22.522	INL			6	#82_10x_02_Overlay.tif:0995-0827	-20.556	22.484	INL
7	#77_10x_02_Overlay.tif:0257-1360	-21.93	41.607	ONL	1.63736		7	#82_10x_02_Overlay.tif:1360-0745	-17.916	35.032	ONL	1.46332
8	#77_10x_02_Overlay.tif:0231-1302	-22.011	25.411	INL			8	#82_10x_02_Overlay.tif:1333-0690	-19.573	23.94	INL
9	#77_10x_03_Overlay.tif:1056-1101	-18.726	46.84	ONL	1.76681		9	#82_10x_03_Overlay.tif:0401-1221	-21.318	33.091	ONL	1.55481
10	#77_10x_03_Overlay.tif:1035-1042	-18.178	26.511	INL			10	#82_10x_03_Overlay.tif:0389-1162	-17.475	21.283	INL
11	#77_10x_03_Overlay.tif:0532-1369	-43.078	39.631	ONL	1.44191		11	#82_10x_03_Overlay.tif:1384-0503	-81.448	33.708	ONL	1.98049
12	#77_10x_03_Overlay.tif:0488-1325	-40.006	27.485	INL			12	#82_10x_03_Overlay.tif:1330-0515	-76.373	17.02	INL
13	#77_10x_04_Overlay.tif:0670-1317	39.289	26.716	ONL	1.7844		13	#82_10x_04_Overlay.tif:0872-1163	-94.399	39.213	ONL	1.6298
14	#77_10x_04_Overlay.tif:0691-1283	38.884	14.972	INL			14	#82_10x_04_Overlay.tif:0820-1254	-90	24.06	INL
15	#77_10x_04_Overlay.tif:1196-1694	-111.801	35.091	ONL	1.50903		15	#82_10x_04_Overlay.tif:0865-1766	-84.289	37.781	ONL	1.92691
16	#77_10x_04_Overlay.tif:1256-1664	-120.434	23.254	INL			16	#82_10x_04_Overlay.tif:0809-1753	-85.601	19.607	INL
				Average	1.76818						Average	1.7019
				SEM	0.128961						SEM	0.0732377

## Sheet: Statistics
	Table Analyzed	Data 1
	Column B	Data Set-B
	vs.	vs.
	Column A	Data Set-A
	Nested t test
	P value	0.5341
	P value summary	ns
	Significantly different (P < 0.05)?	No
	One- or two-tailed P value?	Two-tailed
	t, df	t=0.6497, df=8
	F, DFn, Dfd	0.4221, 1, 8
	How big is the difference?
	Mean of column B	1.802
	Mean of column A	1.84
	Difference between means (B - A) ± SEM	-0.03881 ± 0.05974
	95% confidence interval	-0.1766 to 0.09895
	Random effects	SD	Variance
	Variation within subcolumns	0.2341	0.05478
	Variation among subcolumn means	0.04554	0.002073
	Do the subcolumns differ (within each column)?
	Chi-square, df	0.2694, 1
	P value	0.6037
	P value summary	ns
	Is there significant difference between subcolumns (P < 0.05)?	No
	Data analyzed
	Number of treatments (columns)	2
	Number of subjects (subcolumns)	10
	Total number of values	80
