# Supplementary material for: Myristoylated Neuronal Calcium Sensor-1 captures the preciliary vesicle at distal appendages
Source: eLife. 2025 Jan 30;14:e85998. doi: 10.7554/eLife.85998 (PMC11984960; doi:10.7554/eLife.85998)
Supplement: Source data 1. [file elife-85998-data1.xlsx]

## Sheet: Sheet1
Primer name	Direction	Sequence	Purpose
C3orf14_G53_3F	Forward	TCAAAAGACCAGAGAGGCTAAAA	Genomic PCR to analyze C3orf14 knockout cells
C3orf14_G685_3R	Reverse	AGTTGATTGCAAACATTTAGCTT
sgCEP89#3_genomic PCR_261_F	Forward	GGCGACAGAGCAAGACTCTA	Genomic PCR to analyze CEP89 knockout cells
sgCEP89#3_genomic PCR_803_R	Reverse	GCTGTGAATGGAACTCCACA
sgCEP89_F	Forward	TTGGCCAAATTGGCAGAGTGAGAGTTTAAGAGC	Generating pMCB306 containing sgCEP89
sgCEP89_R	Reverse	TTAGCTCTTAAACTCTCACTCTGCCAATTTGGCCAACAAG
sgC3ORF14_F	Forward	TTGGGGTGATCAACACACAGAAAGTTTAAGAGC	Generating pMCB306 containing sgC3ORF14
sgC3ORF14_R	Reverse	TTAGCTCTTAAACTTTCTGTGTGTTGATCACCCCAACAAG
sgNCS1_F	Forward	TTGGTTGTGGAGGAGCTGACCGTTTAAGAGC	Generating pMCB306 containing sgNCS1
sgNCS1_R	Reverse	TTAGCTCTTAAACGGTCAGCTCCTCCACAACCAACAAG
sgRAB34_F	Forward	TTGGCGGAGGGATCGCGTCCTGGGTTTAAGAGC	Generating pMCB306 containing sgRAB34
sgRAB34_R	Reverse	TTAGCTCTTAAACCCAGGACGCGATCCCTCCGCCAACAAG
