# Supplementary material for: Myristoylated Neuronal Calcium Sensor-1 captures the preciliary vesicle at distal appendages
Source: eLife. 2025 Jan 30;14:e85998. doi: 10.7554/eLife.85998 (PMC11984960; doi:10.7554/eLife.85998)
Supplement: Source data 2. [file elife-85998-data2.xlsx]

## Sheet: Sheet1
Name	Species	Genotype	Mother	Genotype of the mother	Date of preparation	Embryonic day
NCS1 MEF #6	Mouse	Ncs1+/+	HF4	Ncs1+/-	2019-07-08	E13.5
NCS1 MEF #7	Mouse	Ncs1+/+	HF4	Ncs1+/-	2019-07-08	E13.5
NCS1 MEF #10	Mouse	Ncs1-/-	HF4	Ncs1+/-	2019-07-08	E13.5
NCS1 MEF #12	Mouse	Ncs1+/+	NCS1#10	Ncs1+/-	2019-07-09	E13.5
NCS1 MEF #13	Mouse	Ncs1-/-	NCS1#10	Ncs1+/-	2019-07-09	E13.5
NCS1 MEF #16	Mouse	Ncs1-/-	NCS1#10	Ncs1+/-	2019-07-09	E13.5
NCS1 MEF #19	Mouse	Ncs1+/+	HF18	Ncs1+/-	2019-07-18	E13.5
NCS1 MEF #23	Mouse	Ncs1+/+	HF18	Ncs1+/-	2019-07-18	E13.5
NCS1 MEF #24	Mouse	Ncs1+/+	HF18	Ncs1+/-	2019-07-18	E13.5
NCS1 MEF #27	Mouse	Ncs1-/-	HF19	Ncs1+/-	2019-07-18	E13.5
NCS1 MEF #30	Mouse	Ncs1-/-	HF19	Ncs1+/-	2019-07-18	E13.5
NCS1 MEF #32	Mouse	Ncs1-/-	HF19	Ncs1+/-	2019-07-18	E13.5
