# Supplementary material for: Myristoylated Neuronal Calcium Sensor-1 captures the preciliary vesicle at distal appendages
Source: eLife. 2025 Jan 30;14:e85998. doi: 10.7554/eLife.85998 (PMC11984960; doi:10.7554/eLife.85998)
Supplement: Source data 3. [file elife-85998-data3.xlsx]

## Sheet: Sheet1
Name	Species	Genotype	Mother	Genotype of the mother	Date of preparation
NCS1 neuron #5	Mouse	Ncs1+/+	HF11	Ncs1+/-	2019-08-06
NCS1 neuron #6	Mouse	Ncs1+/+	HF11	Ncs1+/-	2019-08-06
NCS1 neuron #10	Mouse	Ncs1-/-	HF11	Ncs1+/-	2019-08-06
NCS1 neuron #12	Mouse	Ncs1+/+	NCS1#9	Ncs1+/-	2019-08-19
NCS1 neuron #14	Mouse	Ncs1+/+	NCS1#9	Ncs1+/-	2019-08-19
NCS1 neuron #21	Mouse	Ncs1-/-	HF16	Ncs1+/-	2019-08-26
NCS1 neuron #22	Mouse	Ncs1+/+	HF16	Ncs1+/-	2019-08-26
NCS1 neuron #23	Mouse	Ncs1+/+	HF16	Ncs1+/-	2019-08-26
NCS1 neuron #24	Mouse	Ncs1-/-	HF16	Ncs1+/-	2019-08-26
NCS1 neuron #26	Mouse	Ncs1-/-	HF16	Ncs1+/-	2019-08-26
NCS1 neuron #34	Mouse	Ncs1+/+	HF9	Ncs1+/-	2019-10-01
NCS1 neuron #36	Mouse	Ncs1-/-	HF9	Ncs1+/-	2019-10-01
