# Supplementary material for: Myristoylated Neuronal Calcium Sensor-1 captures the preciliary vesicle at distal appendages
Source: eLife. 2025 Jan 30;14:e85998. doi: 10.7554/eLife.85998 (PMC11984960; doi:10.7554/eLife.85998)
Supplement: Source data 4. [file elife-85998-data4.xlsx]

## Sheet: Sheet1
Name	Supplier	Catalog number	Application	Fixation method for IF	Figures
Pericentrin	Abcam	ab4448	IF	4% PFA at RT for 15 minutes	Fig.2B
CEP164 antibody	Santa Cruz	sc-515403	IF	100% methanol at -20℃ for 5 minutes	Fig.2D, Fig.2E, Fig.2I, Fig.3F
CEP164 antibody	SIGMA	HPA037605	IF	4% PFA at RT for 15 minutes	Fig.2F, Fig.2H
CEP164 antibody	Proteintech	22227-1-AP	IF	4% PFA at RT for 15 minutes	Fig.7E-F
TTBK2 antibody	SIGMA	HPA018113	IF	4% PFA at RT for 15 minutes	Fig.2S3A
KIZ antibody	Proteintech	21177-1-AP	IF	100% methanol at -20℃ for 5 minutes	Fig.2S3B
ANKRD26 antibody	in house	N.A.	IF	100% methanol at -20℃ for 5 minutes	Fig.2S3C
CEP89 antibody	Proteintech	24002-1-AP	IF	100% methanol at -20℃ for 5 minutes	Fig.2G, Fig.2K, Fig.2S2A
			WB	N.A.	Fig.1S1A, Fig.2S2D, Fig.5A
CEP170 antibody	Invitrogen	41-3200	IF	4% PFA at RT for 15 minutes or 100% methanol at -20℃ for 5 minutes	Fig.2F-M, Fig.3B, Fig.3G-H, Fig.4B-C, Fig.5C-F, Fig.1S1B, Fig.2S1
Ninein antibody	Abcam	ab52473 (discontinued)	IF	100% methanol at -20℃ for 5 minutes	Fig.2D
CP110 antibody	Proteintech	12780-1-AP	IF	100% methanol at -20℃ for 5 minutes	Fig.3F
FGFR1OP antibody	Abnova	H00011116-M01	IF	100% methanol at -20℃ for 5 minutes	Fig.3F, Fig.6B
				4% PFA perfusion, post-fix in 100% methanol at -20℃ overnight	Fig.7G-H, Fig.7S2A-E
IFT88 antibody	Proteintech	13967-1-AP	IF	4% PFA at RT for 15 minutes	Fig.3G
			WB	N.A.	Fig.7S1A
Rabbit polyclonal NCS1 antibody	Proteintech	10506-2-AP	WB	N.A.	Fig.1S1A, Fig.4A, Fig.5A
Rabbit monoclonal NCS1 antibody	Cell Signaling	8237P	IF	4% PFA at RT for 15 minutes	Fig.1D, Fig.2A, Fig.2C, Fig.2L, Fig.2S2B, Fig.5C, Fig.5D, Fig.5S1B, Fig.6F, Fig.7A
				100% methanol at -20℃ for 5 minutes	Fig.2I, Fig.2S3D, Fig.6E,
				4% PFA perfusion, post-fix in 100% methanol at -20℃ overnight	Fig.5D, Fig.7B-D, Fig.7S2A-E
			WB	N.A.	Fig.2S2D, Fig.5B, Fig.5S1A, Fig.7S1A
Mouse monoclonal NCS1 antibody	Santa Cruz	sc-376206	IF	4% PFA at RT for 15 minutes	Fig.2F, Fig.2G
MYO5A antibody	Santa Cruz	sc-365986	IF	4% PFA at RT for 15 minutes	Fig.4D, Fig.5F
RAB34 antibody	Proteintech	27435-1-AP	IF, WB	4% PFA at RT for 15 minutes	Fig.3C, Fig.4D, Fig.5F
CEP19 antibody	in house (Kanie et al., 2017, Dev.Cell)		IF	4% PFA at RT for 15 minutes	Fig.3H
ARL13B antibody	Proteintech	17711-1-AP	IF	4% PFA at RT for 15 minutes	Fig.3A-B, Fig.4B-C, Fig.5E, Fig.6C, Fig.3S1A-D,
ARL13B antibody	NeuroMab	75-287	IF	4% PFA at RT for 15 minutes	Fig.7A
				4% PFA perfusion, post-fix in 100% methanol at -20℃ overnight	Fig.7S2A-E, Fig.7C-F
alpha-Tubulin antibody (DM1A)	SIGMA	T6199	IF	100% methanol at -20℃ for 5 minutes	Fig.6B
			WB	N.A.	Fig.1D, Fig.2S2D-E, Fig.4A, Fig.5S1A, Fig.7S1A
Acetylated Tubulin (6-11B-1)	SIGMA	T7451	IF	4% PFA at RT for 15 minutes	Fig.1S1B, Fig.2B, Fig.2D, Fig.2E, Fig.2M, Fig.5S1A, Fig.7E-F
rabbit anti-GFP antibody	Invitrogen	A11122	WB	N.A.	Fig.1E, Fig.1F, Fig.1S2A, Fig.2S2E
Chicken anti-GFP antibody	Invitrogen	A10262	IF	4% PFA at RT for 15 minutes	Fig.1E, Fig.1F, Fig.1S1B, Fig.1S2A, Fig.2M, Fig.2S1A-D, Fig.2S2C
HA antibody	BioLegend	901501	WB	N.A.	Fig.1E-F, Fig.1S2A
MYC antibody	Abcam	ab9106	WB	N.A.	Fig.1E-F, Fig.1S2A
EGFR antibody	Santa Cruz	sc-373746	WB	N.A.	Fig.5A
RabGDI antibody	Santa Cruz	sc-374649	WB	N.A.	Fig.5A
ADCY3 antibody	Santa Cruz	sc-588	IF	4% PFA perfusion, post-fix in 100% methanol at -20℃ overnight	Fig.7B
				4% PFA at RT for 15 minutes	Fig.7H
beta tubulin III antibody	Santa Cruz	sc-80005	WB	N.A.	Fig.7S1A
SSTR3 antibody	Santa Cruz	sc-11617	IF	4% PFA at RT for 15 minutes	Fig.7S3A
GPR161 antibody	in house (Mukhopadhyay et al., 2013, Cell)		IF	4% PFA at RT for 15 minutes	Fig.7S3B
