# Supplementary material for: Myristoylated Neuronal Calcium Sensor-1 captures the preciliary vesicle at distal appendages
Source: eLife. 2025 Jan 30;14:e85998. doi: 10.7554/eLife.85998 (PMC11984960; doi:10.7554/eLife.85998)
Supplement: Source data 5. [file elife-85998-data5.xlsx]

## Sheet: Sheet1
Name	Species	Source	Note	Figures
293T	Homo Sapiens	ATCC	Maintained in the Jackson lab for a long time. Authenticated by short tandem repeat based test on March 2022. Showed 91% identity with the database
RPE-hTERT	Homo Sapiens	ATCC	Maintained in the Jackson lab for a long time. Authenticated by short tandem repeat based test on March 2022. Showed 100% identity with the database	Fig.2C
RPE-FRT9			RPE-hTERT cells stably expressing FRT, Flp-in compatible cells
RPE-BFP-Cas9	Homo Sapiens	This paper	RPE-hTERT cells stably expressing BFP-Cas9
RPE-BFP-Cas9 CEP89 knockout_clone 2, 4, 5, and 6	Homo Sapiens	This paper
RPE-BFP-Cas9 C3orf14 knockout_clone 5, 9, 10, 13, and 23	Homo Sapiens	This paper
RPE-BFP-Cas9 NCS1 knockout clone 1, 2, and 3	Homo Sapiens	This paper
RPE-BFP-Cas9 RAB34 knockout clone 1, 3, 4, 6, 8, 9	Homo Sapiens	This paper
RPE-BFP-Cas9 sgSafe clone 1, 2, 3, 4, 5, 6	Homo Sapiens	This paper	sgSafe: non-targeting guide RNA
RPE-BFP-Cas9 pMCB306 clone 1, 2, 3, 4, 5, 6	Homo Sapiens	Kanie et al. 2017	pMCB306: sgGFP
RPE-BFP-Cas9 CEP89 knockout (pool)	Homo Sapiens	This paper	Mixture of the single cell clones of CEP89 knockout cells listed above	Fig.2K, 2L, 3A, 3C, 3F, 3G, 3H, Fig2S2A, Fig.2S2B, Fig2S2D,Fig2S3A-D, Fig3S1
RPE-BFP-Cas9 C3orf14 knockout (pool)	Homo Sapiens	This paper	Mixture of the single cell clones of C3ORF14 knockout cells listed above	Fig.2K, 2L, 3A, 3C, 3F, 3G, 3H, Fig2S2A, Fig.2S2B, Fig2S2D,Fig2S3A-D, Fig3S1
RPE-BFP-Cas9 NCS1 knockout (pool)	Homo Sapiens	This paper	Mixture of the single cell clones of NCS1 knockout cells listed above	Fig.2A, 2K, 2L, 3A, 3C, 3D, 3F, 3G, 3H, Fig1S1A, Fig2S2A, Fig.2S2B, Fig2S2D,Fig2S3A-D, Fig3S1
RPE-BFP-Cas9 RAB34 knockout (pool)	Homo Sapiens	This paper	Mixture of the single cell clones of RAB34 knockout cells listed above	Fig.6F
RPE-BFP-Cas9 sgSafe (pool)	Homo Sapiens	This paper	Mixture of the single cell clones of sgSafe cells listed above	Fig.5A-F, Fig.6F
RPE-BFP-Cas9 pMCB306 (pool)	Homo Sapiens	Kanie et al. 2017	Mixture of the single cell clones of sgGFP cells listed above	Fig.2A, Fig.2K, Fig.2L, Fig.3,Fig.2S2, Fig.2S3, Fig.3S1
RPE-FRT9 stably expressing LAP6-CEP89	Homo Sapiens	This paper	RPE-FRT9 stably expressing N-terminally LAP tagged CEP164 created using Flp-in system	Fig.1A
RPE-FRT9 stably expressing LAPC-C3ORF14	Homo Sapiens	This paper	RPE-FRT9 stably expressing C-terminally LAP tagged C3ORF14 created using Flp-in system	Fig.2B, 2D
RPE-hTERT LAPN-CEP89 (full length)	Homo Sapiens	This paper		Fig.2D, Fig.1S1B
RPE-hTERT LAPN-CEP89 (1-343 a.a.)	Homo Sapiens	This paper		Fig.2D, Fig.1S1B
RPE-hTERT LAPN-CEP89 (344-783 a.a.)	Homo Sapiens	This paper		Fig.2D, Fig.1S1B
RPE-hTERT LAPN-DEST	Homo Sapiens	This paper		Fig.2D, Fig.1S1B
RPE-hTERT stably expressing LAPN-NCS1-WT	Homo Sapiens	This paper	N-terminally LAP tagged NCS1 wild-type was lentivirally introduced to RPE-hTERT cells	Fig.2S1A
RPE-hTERT stably expressing LAPN-NCS1-G2A	Homo Sapiens	This paper	N-terminally LAP tagged NCS1 G2A was lentivirally introduced to RPE-hTERT cells	Fig.2S1B
RPE-hTERT stably expressing LAPC-NCS1-WT	Homo Sapiens	This paper	C-terminally LAP tagged NCS1 wild-type was lentivirally introduced to RPE-hTERT cells	Fig.2S1C
RPE-hTERT stably expressing LAPC-NCS1-G2A	Homo Sapiens	This paper	C-terminally LAP tagged NCS1 G2A was lentivirally introduced to RPE-hTERT cells	Fig.2S1D
RPE-BFP-Cas9 pMCB306 (pool) stably expressing LAPC-C3ORF14	Homo Sapiens	This paper	C-terminally LAP tagged C3ORF14 was introduced by lenti-viral transduction in RPE-BFP-Cas9 pMCB306 (pool) described above	Fig.2M, Fig.2S2E
RPE-BFP-Cas9 CEP89 knockout (pool) stably expressing LAPC-C3ORF14	Homo Sapiens	This paper	C-terminally LAP tagged C3ORF14 was introduced by lenti-viral transduction in RPE-BFP-Cas9 CEP89 knockout (pool) described above	Fig.2M, Fig.2S2E
RPE-BFP-Cas9 NCS1 knockout (pool) stably expressing LAPC-C3ORF14	Homo Sapiens	This paper	C-terminally LAP tagged C3ORF14 was introduced by lenti-viral transduction in RPE-BFP-Cas9 NCS1 knockout (pool) described above	Fig.2M, Fig.2S2E
RPE-BFP-Cas9 CEP89 knockout (pool) stably expressing empty vector	Homo Sapiens	This paper	Lenti-virus containing empty cassette was introduced to RPE-BFP-Cas9 CEP89 knockout (pool) cells	Fig.2L, 3B, Fig.2S2A-B, Fig.2S2D, Fig.3S1
RPE-BFP-Cas9 CEP89 knockout (pool) stably expressing untagged CEP89	Homo Sapiens	This paper	Lenti-virus carrying untagged CEP89 was introduced to RPE-BFP-Cas9 CEP89 knockout (pool) cells	Fig.2L, 3B, Fig.2S2A-B, Fig.2S2D, Fig.3S1
RPE-BFP-Cas9 NCS1 knockout (pool) stably expressing empty vector	Homo Sapiens	This paper	Lenti-virus containing empty cassette was introduced to RPE-BFP-Cas9 NCS1 knockout (pool) cells	Fig.3B, Fig.5A-F, Fig.3S1, Fig.5S1B-C, Fig.2S2A-B, Fig.2S2D, Fig.3S1
RPE-BFP-Cas9 NCS1 knockout (pool) stably expressing untagged NCS1	Homo Sapiens	This paper	Lenti-virus carrying untagged NCS1 was introduced to RPE-BFP-Cas9 NCS1 knockout (pool) cells	Fig.3B, Fig.5A-F, Fig.3S1, Fig.5S1B-C, Fig.2S2A-B, Fig.2S2D, Fig.3S1
RPE-BFP-Cas9 NCS1 knockout (pool) stably expressing untagged NCS1-G2A	Homo Sapiens	This paper	Lenti-virus carrying untagged NCS1-G2A was introduced to RPE-BFP-Cas9 NCS1 knockout (pool) cells	Fig.5A-F
RPE-BFP-Cas9 NCS1 knockout (pool) stably expressing untagged NCS1 E84Q	Homo Sapiens	This paper	Lenti-virus carrying untagged NCS1 E84Q was introduced to RPE-BFP-Cas9 NCS1 knockout (pool) cells	Fig.5S1B-C
RPE-BFP-Cas9 NCS1 knockout (pool) stably expressing untagged NCS1 E120Q	Homo Sapiens	This paper	Lenti-virus carrying untagged NCS1 E120Qwas introduced to RPE-BFP-Cas9 NCS1 knockout (pool) cells	Fig.5S1B-C
RPE-BFP-Cas9 NCS1 knockout (pool) stably expressing untagged NCS1 E168Q	Homo Sapiens	This paper	Lenti-virus carrying untagged NCS1 E168Q was introduced to RPE-BFP-Cas9 NCS1 knockout (pool) cells	Fig.5S1B-C
RPE-BFP-Cas9 NCS1 knockout (pool) stably expressing untagged NCS1 E84Q; E120Q	Homo Sapiens	This paper	Lenti-virus carrying untagged NCS1 E84Q; E120Q was introduced to RPE-BFP-Cas9 NCS1 knockout (pool) cells	Fig.5S1B-C
RPE-BFP-Cas9 NCS1 knockout (pool) stably expressing untagged NCS1 E84Q: E168Q	Homo Sapiens	This paper	Lenti-virus carrying untagged NCS1 E84Q; E168Q was introduced to RPE-BFP-Cas9 NCS1 knockout (pool) cells	Fig.5S1B-C
RPE-BFP-Cas9 NCS1 knockout (pool) stably expressing untagged NCS1 E120Q: E168Q	Homo Sapiens	This paper	Lenti-virus carrying untagged NCS1 E120Q; E168Q was introduced to RPE-BFP-Cas9 NCS1 knockout (pool) cells	Fig.5S1B-C
RPE-BFP-Cas9 NCS1 knockout (pool) stably expressing untagged NCS1 E84Q; E120Q; E168Q	Homo Sapiens	This paper	Lenti-virus carrying untagged NCS1 E84Q; E120Q; E168Q was introduced to RPE-BFP-Cas9 NCS1 knockout (pool) cells	Fig.5S1B-C
RPE-BFP-Cas9 NCS1 knockout (pool) stably expressing untagged NCS1 and LAPN-CEP89	Homo Sapiens	This paper	Lenti-virus carrying untagged NCS1 was introduced to RPE-BFP-Cas9 NCS1 knockout (pool) cells stably expressing LAPN-CEP89, which was created by lenti-viral trunsduction	Fig.5S1A
RPE-BFP-Cas9 NCS1 knockout (pool) stably expressing untagged NCS1-G2A and LAPN-CEP89	Homo Sapiens	This paper	Lenti-virus carrying untagged NCS1-G2A was introduced to RPE-BFP-Cas9 NCS1 knockout (pool) cells stably expressing LAPN-CEP89, which was created by lenti-viral trunsduction	Fig.5S1A
RPE-BFP-Cas9 NCS1 knockout (pool) stably expressing untagged NCS1 E84Q and LAPN-CEP89	Homo Sapiens	This paper	Lenti-virus carrying untagged NCS1 E84Q was introduced to RPE-BFP-Cas9 NCS1 knockout (pool) cells stably expressing LAPN-CEP89, which was created by lenti-viral trunsduction	Fig.5S1A
RPE-BFP-Cas9 NCS1 knockout (pool) stably expressing untagged NCS1 E120Q and LAPN-CEP89	Homo Sapiens	This paper	Lenti-virus carrying untagged NCS1 E120Qwas introduced to RPE-BFP-Cas9 NCS1 knockout (pool) cells stably expressing LAPN-CEP89, which was created by lenti-viral trunsduction	Fig.5S1A
RPE-BFP-Cas9 NCS1 knockout (pool) stably expressing untagged NCS1 E168Q and LAPN-CEP89	Homo Sapiens	This paper	Lenti-virus carrying untagged NCS1 E168Q was introduced to RPE-BFP-Cas9 NCS1 knockout (pool) cells stably expressing LAPN-CEP89, which was created by lenti-viral trunsduction	Fig.5S1A
RPE-BFP-Cas9 NCS1 knockout (pool) stably expressing untagged NCS1 E84Q; E120Q and LAPN-CEP89	Homo Sapiens	This paper	Lenti-virus carrying untagged NCS1 E84Q; E120Q was introduced to RPE-BFP-Cas9 NCS1 knockout (pool) cells stably expressing LAPN-CEP89, which was created by lenti-viral trunsduction	Fig.5S1A
RPE-BFP-Cas9 NCS1 knockout (pool) stably expressing untagged NCS1 E84Q: E168Q and LAPN-CEP89	Homo Sapiens	This paper	Lenti-virus carrying untagged NCS1 E84Q; E168Q was introduced to RPE-BFP-Cas9 NCS1 knockout (pool) cells stably expressing LAPN-CEP89, which was created by lenti-viral trunsduction	Fig.5S1A
RPE-BFP-Cas9 NCS1 knockout (pool) stably expressing untagged NCS1 E120Q: E168Q and LAPN-CEP89	Homo Sapiens	This paper	Lenti-virus carrying untagged NCS1 E120Q; E168Q was introduced to RPE-BFP-Cas9 NCS1 knockout (pool) cells stably expressing LAPN-CEP89, which was created by lenti-viral trunsduction	Fig.5S1A
RPE-BFP-Cas9 NCS1 knockout (pool) stably expressing untagged NCS1 E84Q; E120Q; E168Qand LAPN-CEP89	Homo Sapiens	This paper	Lenti-virus carrying untagged NCS1 E84Q; E120Q; E168Q was introduced to RPE-BFP-Cas9 NCS1 knockout (pool) cells stably expressing LAPN-CEP89, which was created by lenti-viral trunsduction	Fig.5S1A
RPE-BFP-Cas9 pMCB306 (pool) stably expressing sgSafe	Homo Sapiens	This paper	Lenti-virus carrying sgSafe was introduced to RPE-BFP-Cas9 pMCB306 (pool) cells	Fig.4
RPE-BFP-Cas9 pMCB306 (pool) stably expressing sgNCS1	Homo Sapiens	This paper	Lenti-virus carrying sgNCS1 was introduced to RPE-BFP-Cas9 pMCB306 (pool) cells	Fig.4
RPE-BFP-Cas9 FBF1 knockout cells (pool) stably expressing sgSafe	Homo Sapiens	This paper	Lenti-virus carrying sgSafe was introduced to RPE-BFP-Cas9 FBF1 knockout (pool) cells	Fig.4
RPE-BFP-Cas9 FBF1 knockout cells (pool) stably expressing sgNCS1	Homo Sapiens	This paper	Lenti-virus carrying sgNCS1 was introduced to RPE-BFP-Cas9 FBF1 knockout (pool) cells	Fig.4
RPE-BFP-Cas9 CEP89 knockout cells (pool) stably expressing sgSafe	Homo Sapiens	This paper	Lenti-virus carrying sgSafe was introduced to RPE-BFP-Cas9 CEP89 knockout (pool) cells	Fig.4
RPE-BFP-Cas9 CEP89 knockout cells (pool) stably expressing sgNCS1	Homo Sapiens	This paper	Lenti-virus carrying sgNCS1 was introduced to RPE-BFP-Cas9 CEP89 knockout (pool) cells	Fig.4
RPE-BFP-Cas9 ANKRD26 knockout cells (pool) stably expressing sgSafe	Homo Sapiens	This paper	Lenti-virus carrying sgSafe was introduced to RPE-BFP-Cas9 ANKRD26 knockout (pool) cells	Fig.4
RPE-BFP-Cas9 ANKRD26 knockout cells (pool) stably expressing sgNCS1	Homo Sapiens	This paper	Lenti-virus carrying sgNCS1 was introduced to RPE-BFP-Cas9 ANKRD26 knockout (pool) cells	Fig.4
RPE-BFP-Cas9 INPP5E knockout cells (pool) stably expressing sgSafe	Homo Sapiens	This paper	Lenti-virus carrying sgSafe was introduced to RPE-BFP-Cas9 INPP5E knockout (pool) cells	Fig.4
RPE-BFP-Cas9 INPP5E knockout cells (pool) stably expressing sgNCS1	Homo Sapiens	This paper	Lenti-virus carrying sgNCS1 was introduced to RPE-BFP-Cas9 INPP5E knockout (pool) cells	Fig.4
RPE-BFP-Cas9 KIZ knockout cells (pool) stably expressing sgSafe	Homo Sapiens	This paper	Lenti-virus carrying sgSafe was introduced to RPE-BFP-Cas9 KIZ knockout (pool) cells	Fig.4
RPE-BFP-Cas9 KIZ knockout cells (pool) stably expressing sgSafe	Homo Sapiens	This paper	Lenti-virus carrying sgNCS1 was introduced to RPE-BFP-Cas9 KIZ knockout (pool) cells	Fig.4
RPE-BFP-Cas9 sgLRRC45 stably expressing sgSafe	Homo Sapiens	This paper	Lenti-virus carrying sgSafe was introduced to RPE-BFP-Cas9 sgLRRC45 knockout (pool) cells	Fig.4
RPE-BFP-Cas9 sgLRRC45 stably expressing sgNCS1	Homo Sapiens	This paper	Lenti-virus carrying sgNCS1 was introduced to RPE-BFP-Cas9 sgLRRC45 (pool) cells	Fig.4
NCS1+/+ mouse embryonic fibroblast	Mus musculus	This paper	Generated from E13.5 mouse embryo	Fig.7E-F
NCS1-/- mouse embryonic fibroblast	Mus musculus	This paper	Generated from E13.5 mouse embryo	Fig.7E-F
