# Supplementary material for: Myristoylated Neuronal Calcium Sensor-1 captures the preciliary vesicle at distal appendages
Source: eLife. 2025 Jan 30;14:e85998. doi: 10.7554/eLife.85998 (PMC11984960; doi:10.7554/eLife.85998)
Supplement: Source data 7. [file elife-85998-data7.xlsx]

## Sheet: Knockout cells
Cell line	GuideRNA sequence	Direction	Region	Validated by genomic PCR?	Validated by IF?	Validated by Western blot?
RPE-BFP-Cas9 CEP89 knockout cells	AATTGGCAGAGTGAGA	Forward	hCEP89 CCDS310-325	yes	yes	yes
RPE-BFP-Cas9 C3orf14 knockout cells	GGTGATCAACACACAGAAA	Forward	hC3orf14 CCDS100-118	yes	no	no
RPE-BFP-Cas9 NCS1 knockout cells	TTGTGGAGGAGCTGACC	Forward	hNCS1 CCDS35-51	no	yes	yes
RPE-BFP-Cas9 RAB34 knockout cells	GCGGAGGGATCGCGTCCTGG	Forward	hRab34 CCDS21-40	no	yes	yes
RPE-BFP-Cas9 sgSafe knockout cells	GTCAGTTCCTATGTGGCA	N.A.	N.A.	N.A.	N.A.	N.A.
RPE-BFP-Cas9 sgGFP knockout cells	GACCAGGATGGGCACCACCC	Reverse	EGFP CCDS32-51	N.A.	N.A.	N.A.

## Sheet: Genomic PCR
	Cell line	Indel in 1st allele	Indel in 2nd allele
	CEP89 knockout_clone2	2bp deletion	2bp insertion
	CEP89 knockout_clone4	5bp deletion	5bp deletion
	CEP89 knockout_clone5	4bp deletion	4bp deletion
	CEP89 knockout_clone6	155bp deletion	117bp insertion
	C3orf14 knockout_clone5	20bp deletion	20bp deletion
	C3orf14 knockout_clone9	1bp insertion	1bp insertion
	C3orf14 knockout_clone10	145bp deletion	145bp deletion
	C3orf14 knockout_clone13	1bp insertion	1bp insertion
	C3orf14 knockout_clone23	8bp deletion	14bp deletion
