# Supplementary material for: Myristoylated Neuronal Calcium Sensor-1 captures the preciliary vesicle at distal appendages
Source: eLife journal article supplement (doi:10.7554/elife.85998), 2025-01-30

Figure 1-figure supplement1A\_CEP89

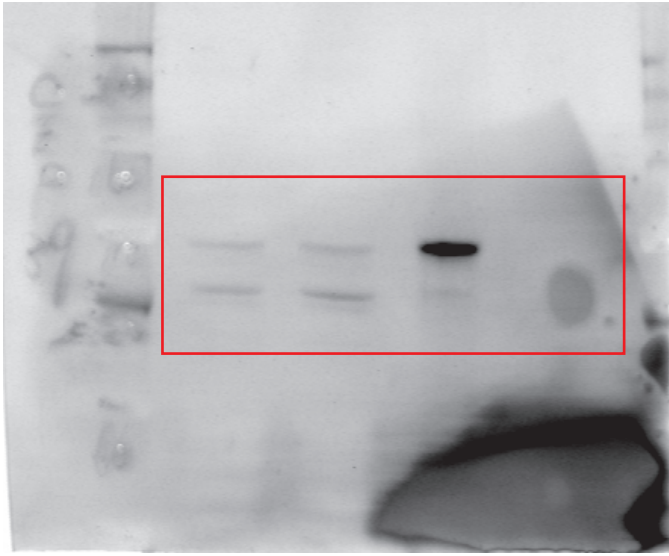

Figure 1-figure supplement1A\_NCS1

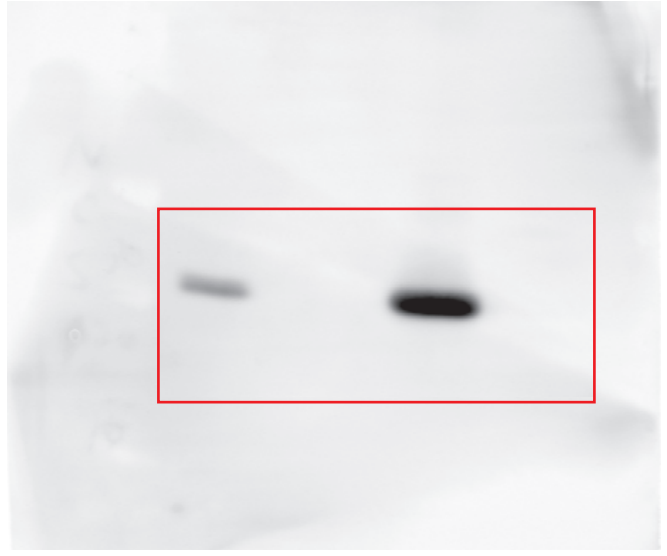

Supplement: supp [file elife_poa_e85998_Figure_1_figure_supplement_1_source_data_2.pdf › elife_poa_e85998_Figure_1_figure_supplement_1_source_data_2.pdf]
