# Supplementary material for: Myristoylated Neuronal Calcium Sensor-1 captures the preciliary vesicle at distal appendages
Source: eLife journal article supplement (doi:10.7554/elife.85998), 2025-01-30

**A** RPE-hTERT expressing LAPN-NCS1-WT  
*NCS1 localization: Cytoplasm, Centriole, Nucleus*

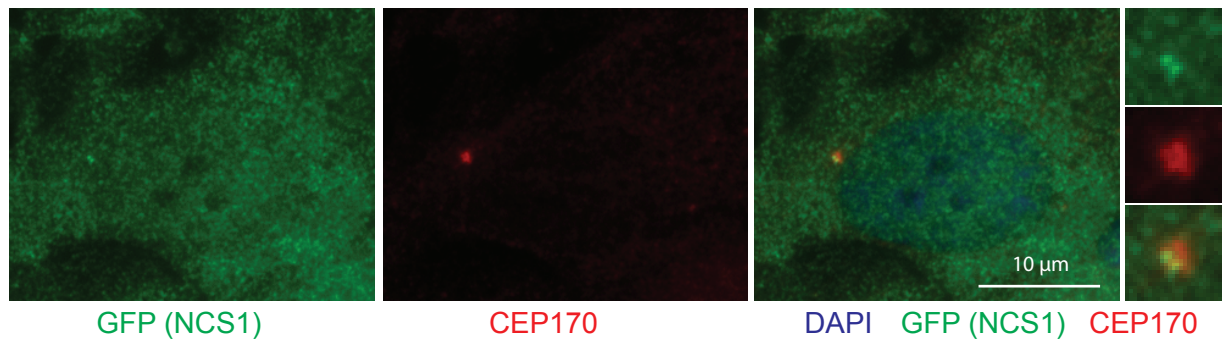

**B** RPE-hTERT expressing LAPN-NCS1-G2A  
*NCS1 localization: Cytoplasm, Centriole, Nucleus*

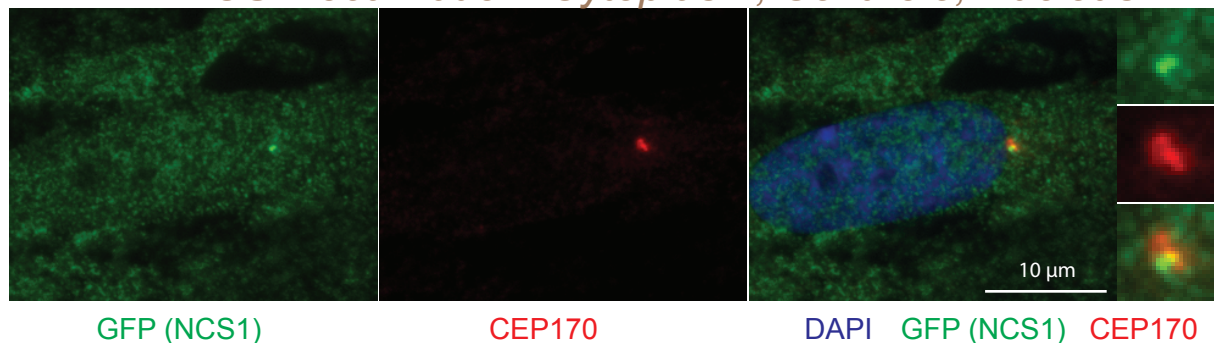

**C** RPE-hTERT expressing LAPC-NCS1-WT  
*NCS1 localization: ER, Plasma membrane, Nucleus*

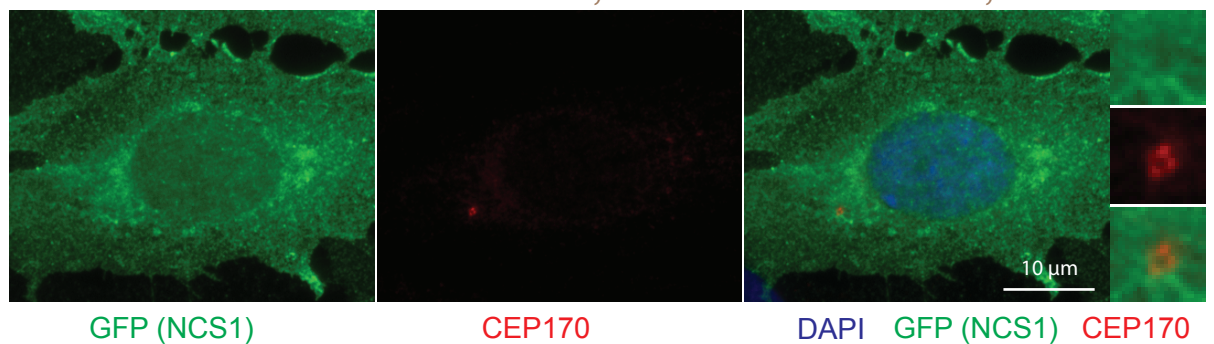

**D** RPE-hTERT expressing LAPC-NCS1-G2A  
*NCS1 localization: Cytoplasm, Nucleus*

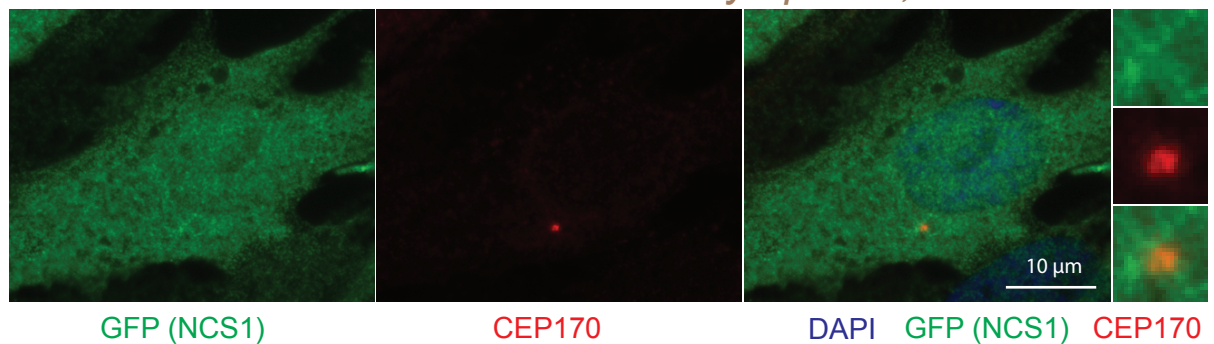

Supplement: supp [file elife_poa_e85998_Figure_2_figure_supplement_1.pdf › elife_poa_e85998_Figure_2_figure_supplement_1.pdf]
