# Supplementary material for: Myristoylated Neuronal Calcium Sensor-1 captures the preciliary vesicle at distal appendages
Source: eLife journal article supplement (doi:10.7554/elife.85998), 2025-01-30

**A** **Cilium length**  
**24 hours serum starvation**

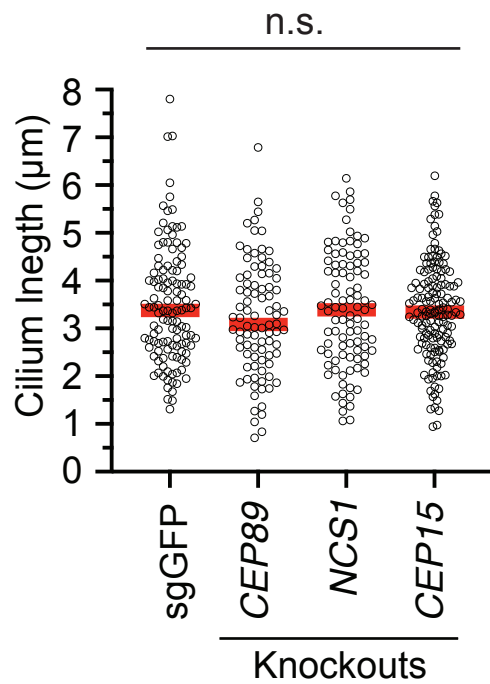

**B** **24 hours serum starvation**

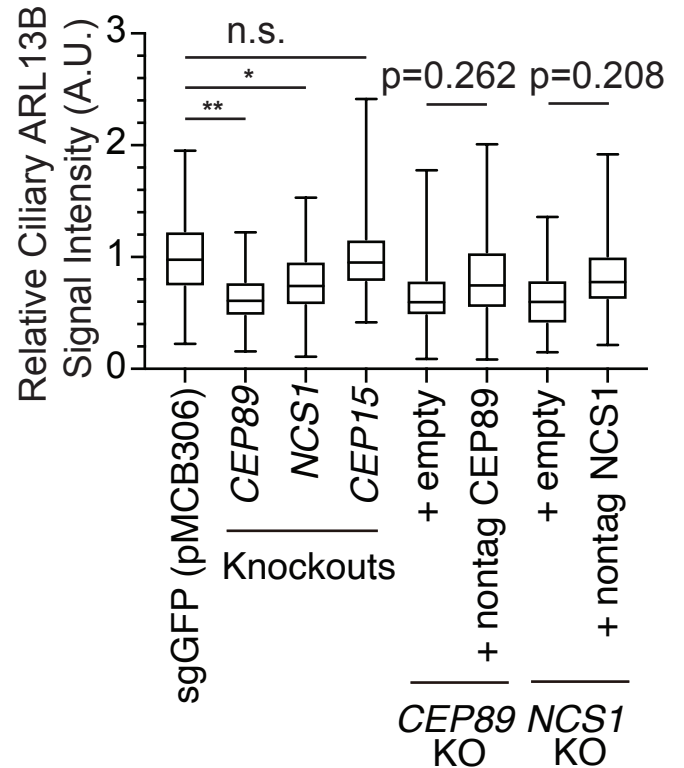

**C** **48 hours serum starvation**

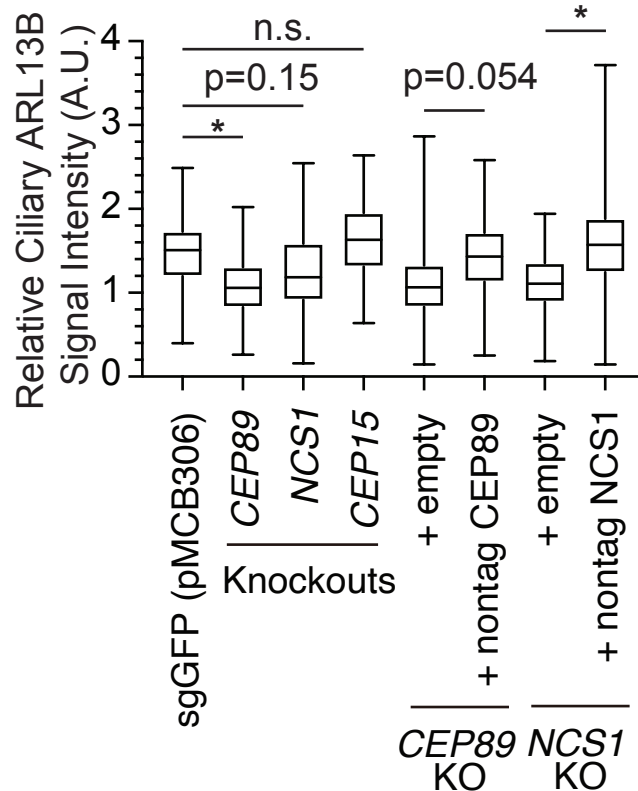

**D** **72 hours serum starvation**

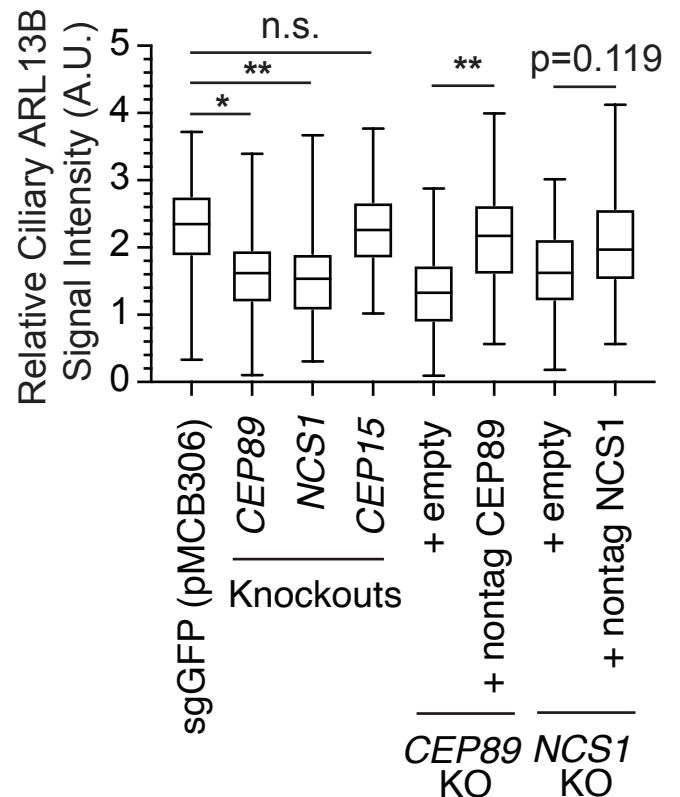

Supplement: supp [file elife_poa_e85998_Figure_3_figure_supplement_1.pdf › elife_poa_e85998_Figure_3_figure_supplement_1.pdf]
