# Supplementary material for: Myristoylated Neuronal Calcium Sensor-1 captures the preciliary vesicle at distal appendages
Source: eLife journal article supplement (doi:10.7554/elife.85998), 2025-01-30

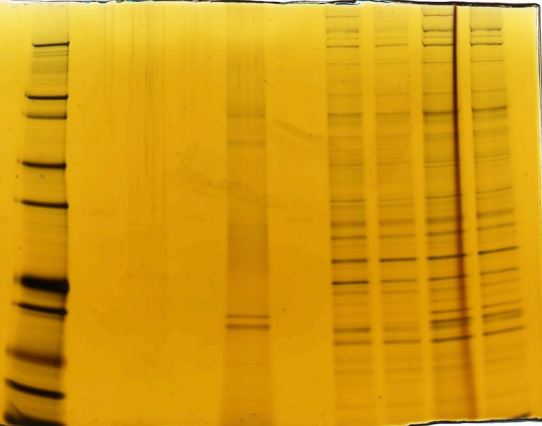

Supplement: supp [file Figure 1-Source Data 1.pdf › Figure 1-Source Data/Figure 1-Source Data 1.pdf]
