# Supplementary material for: Myristoylated Neuronal Calcium Sensor-1 captures the preciliary vesicle at distal appendages
Source: eLife journal article supplement (doi:10.7554/elife.85998), 2025-01-30

Figure 1F\_anti-MYC

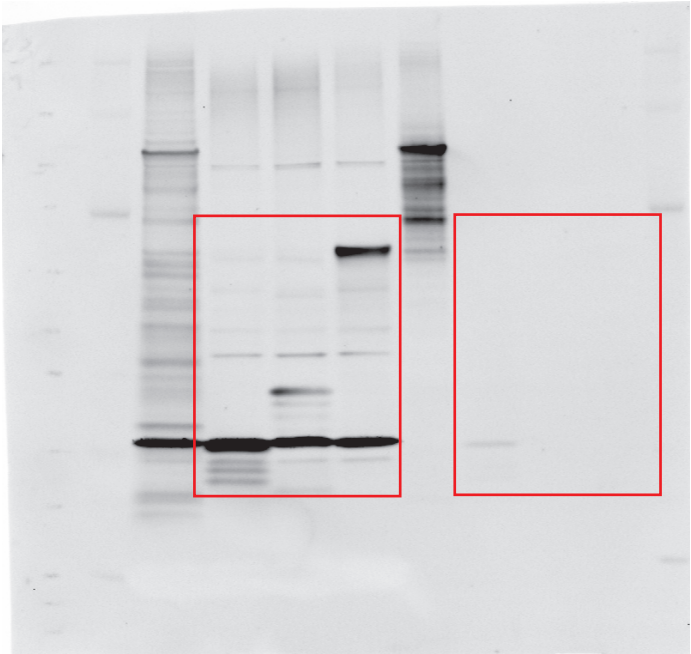

Figure 1F\_anti-HA

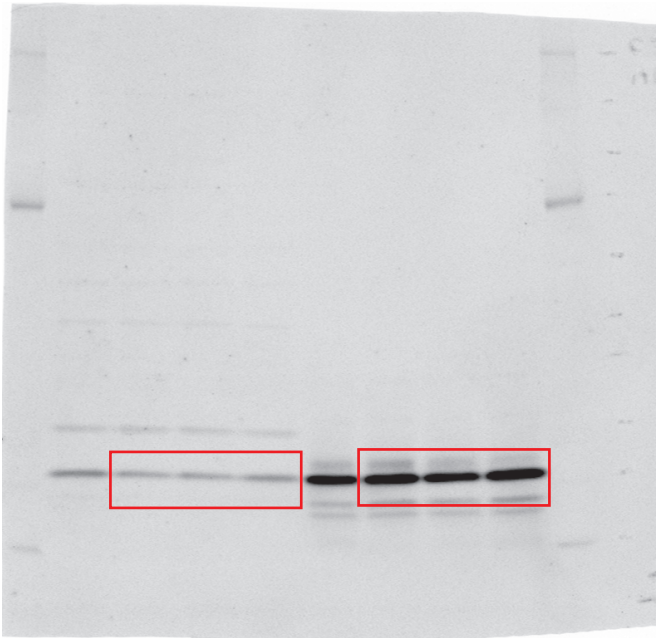

Supplement: supp [file Figure 1-Source Data 8.pdf › Figure 1-Source Data/Figure 1-Source Data 8.pdf]
