# Supplementary material for: Myristoylated Neuronal Calcium Sensor-1 captures the preciliary vesicle at distal appendages
Source: eLife journal article supplement (doi:10.7554/elife.85998), 2025-01-30

Figure 4A\_anti-NCS1

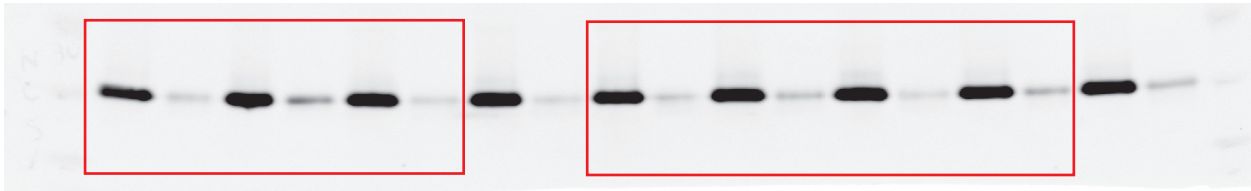

Figure 4A\_anti-Tubulin

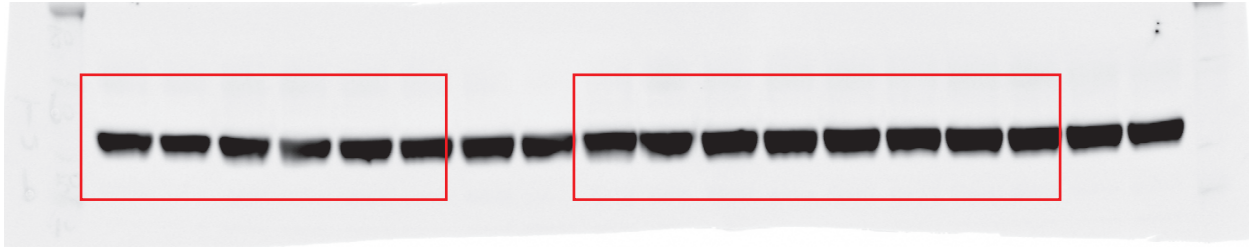

Supplement: supp [file Figure 4-Source Data 2.pdf › Figure 4-Source Data/Figure 4-Source Data 2.pdf]
