# Supplementary material for: Myristoylated Neuronal Calcium Sensor-1 captures the preciliary vesicle at distal appendages
Source: eLife journal article supplement (doi:10.7554/elife.85998), 2025-01-30

Figure 5B\_NCS1

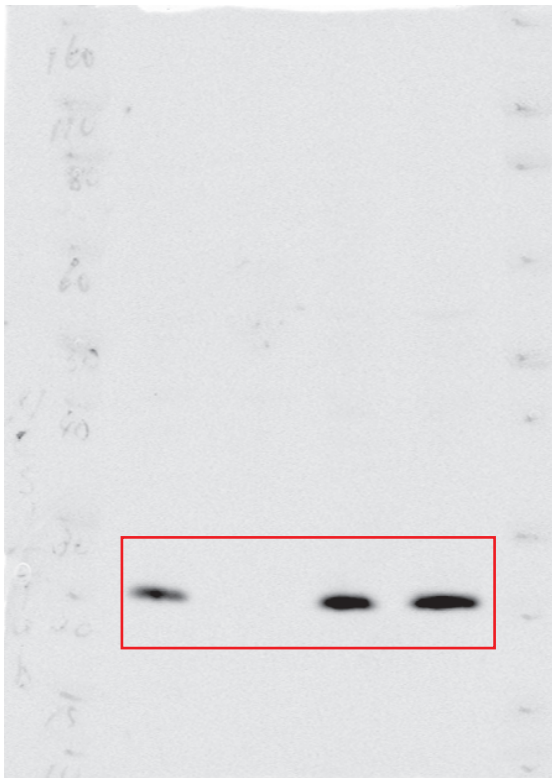

Figure 5B\_Tubulin

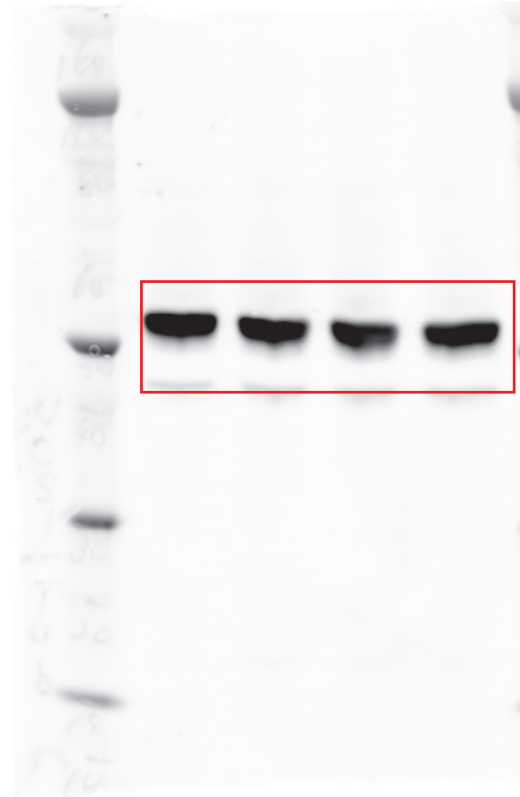

Supplement: supp [file Figure 5-Source Data 4.pdf › Figure 5-Source Data/Figure 5-Source Data 4.pdf]
