# Supplementary figures and images for: Myristoylated Neuronal Calcium Sensor-1 captures the preciliary vesicle at distal appendages
Source: eLife journal article supplement (doi:10.7554/elife.85998), 2025-01-30

**A**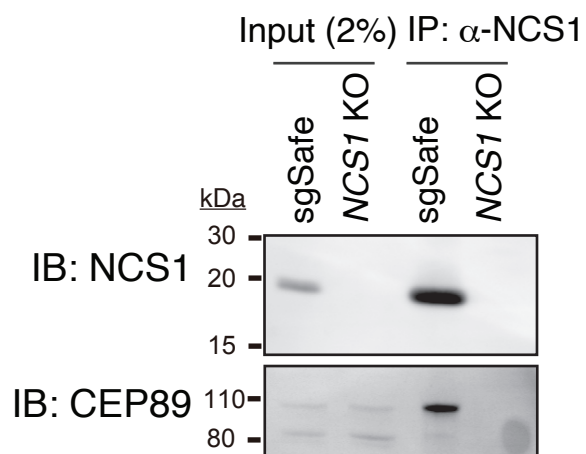**B**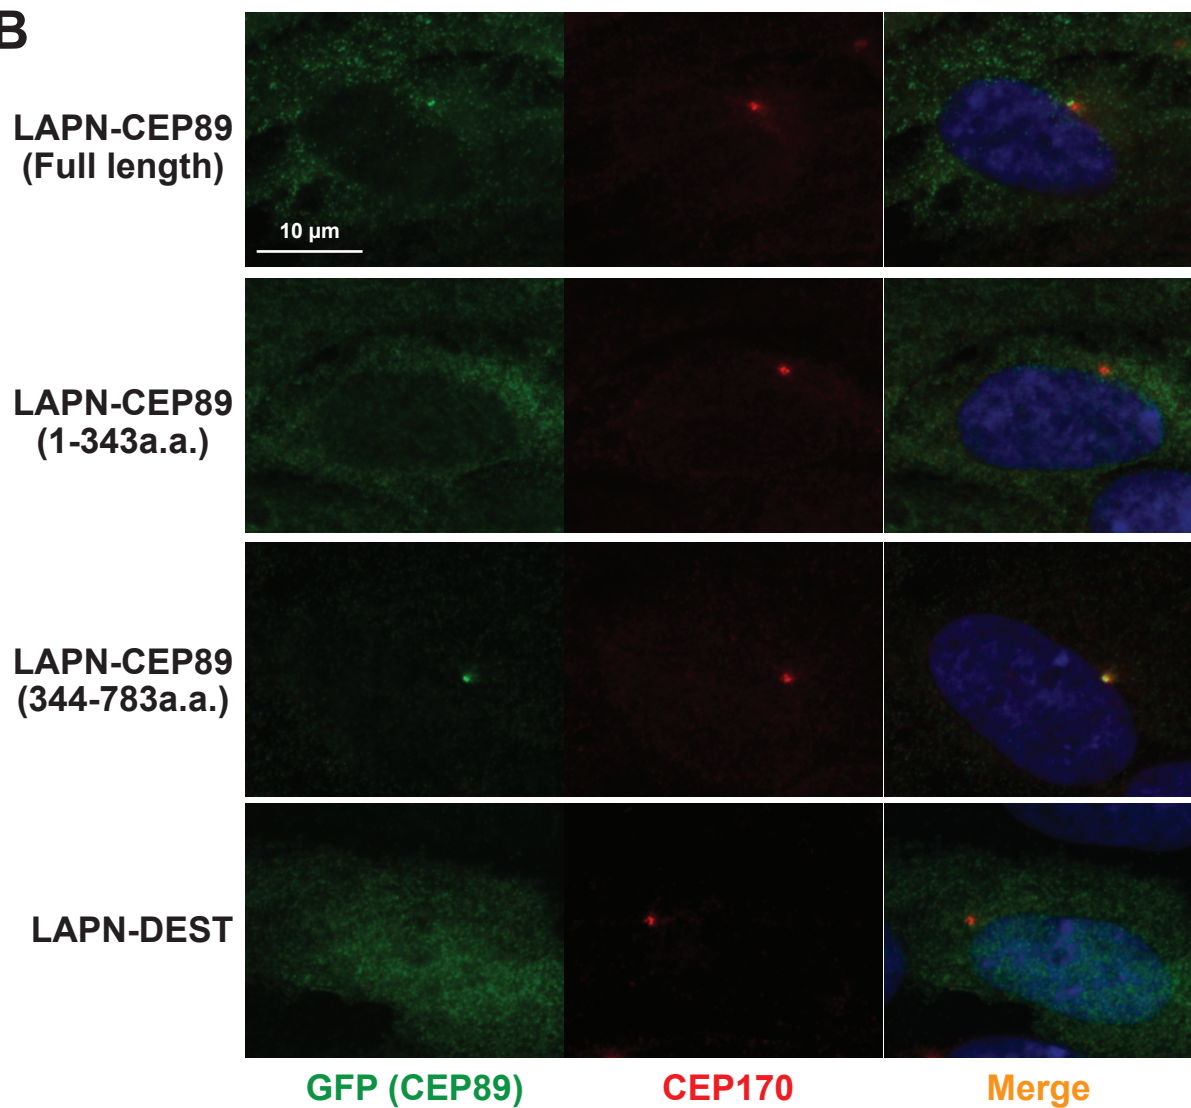

Supplement: supp [file elife_poa_e85998_Figure_1_figure_supplement_1.pdf › elife_poa_e85998_Figure_1_figure_supplement_1.pdf]

**A**

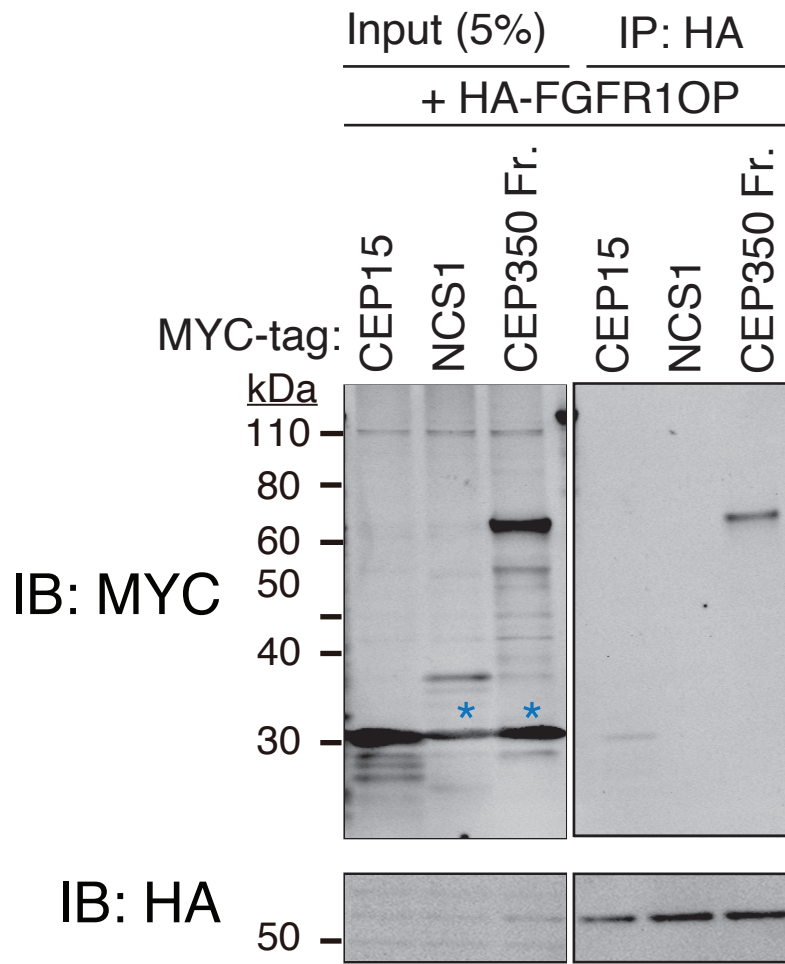

Kanie et al., Figure 1-figure supplement 2

Supplement: supp [file elife_poa_e85998_Figure_1_figure_supplement_2.pdf › elife_poa_e85998_Figure_1_figure_supplement_2.pdf]

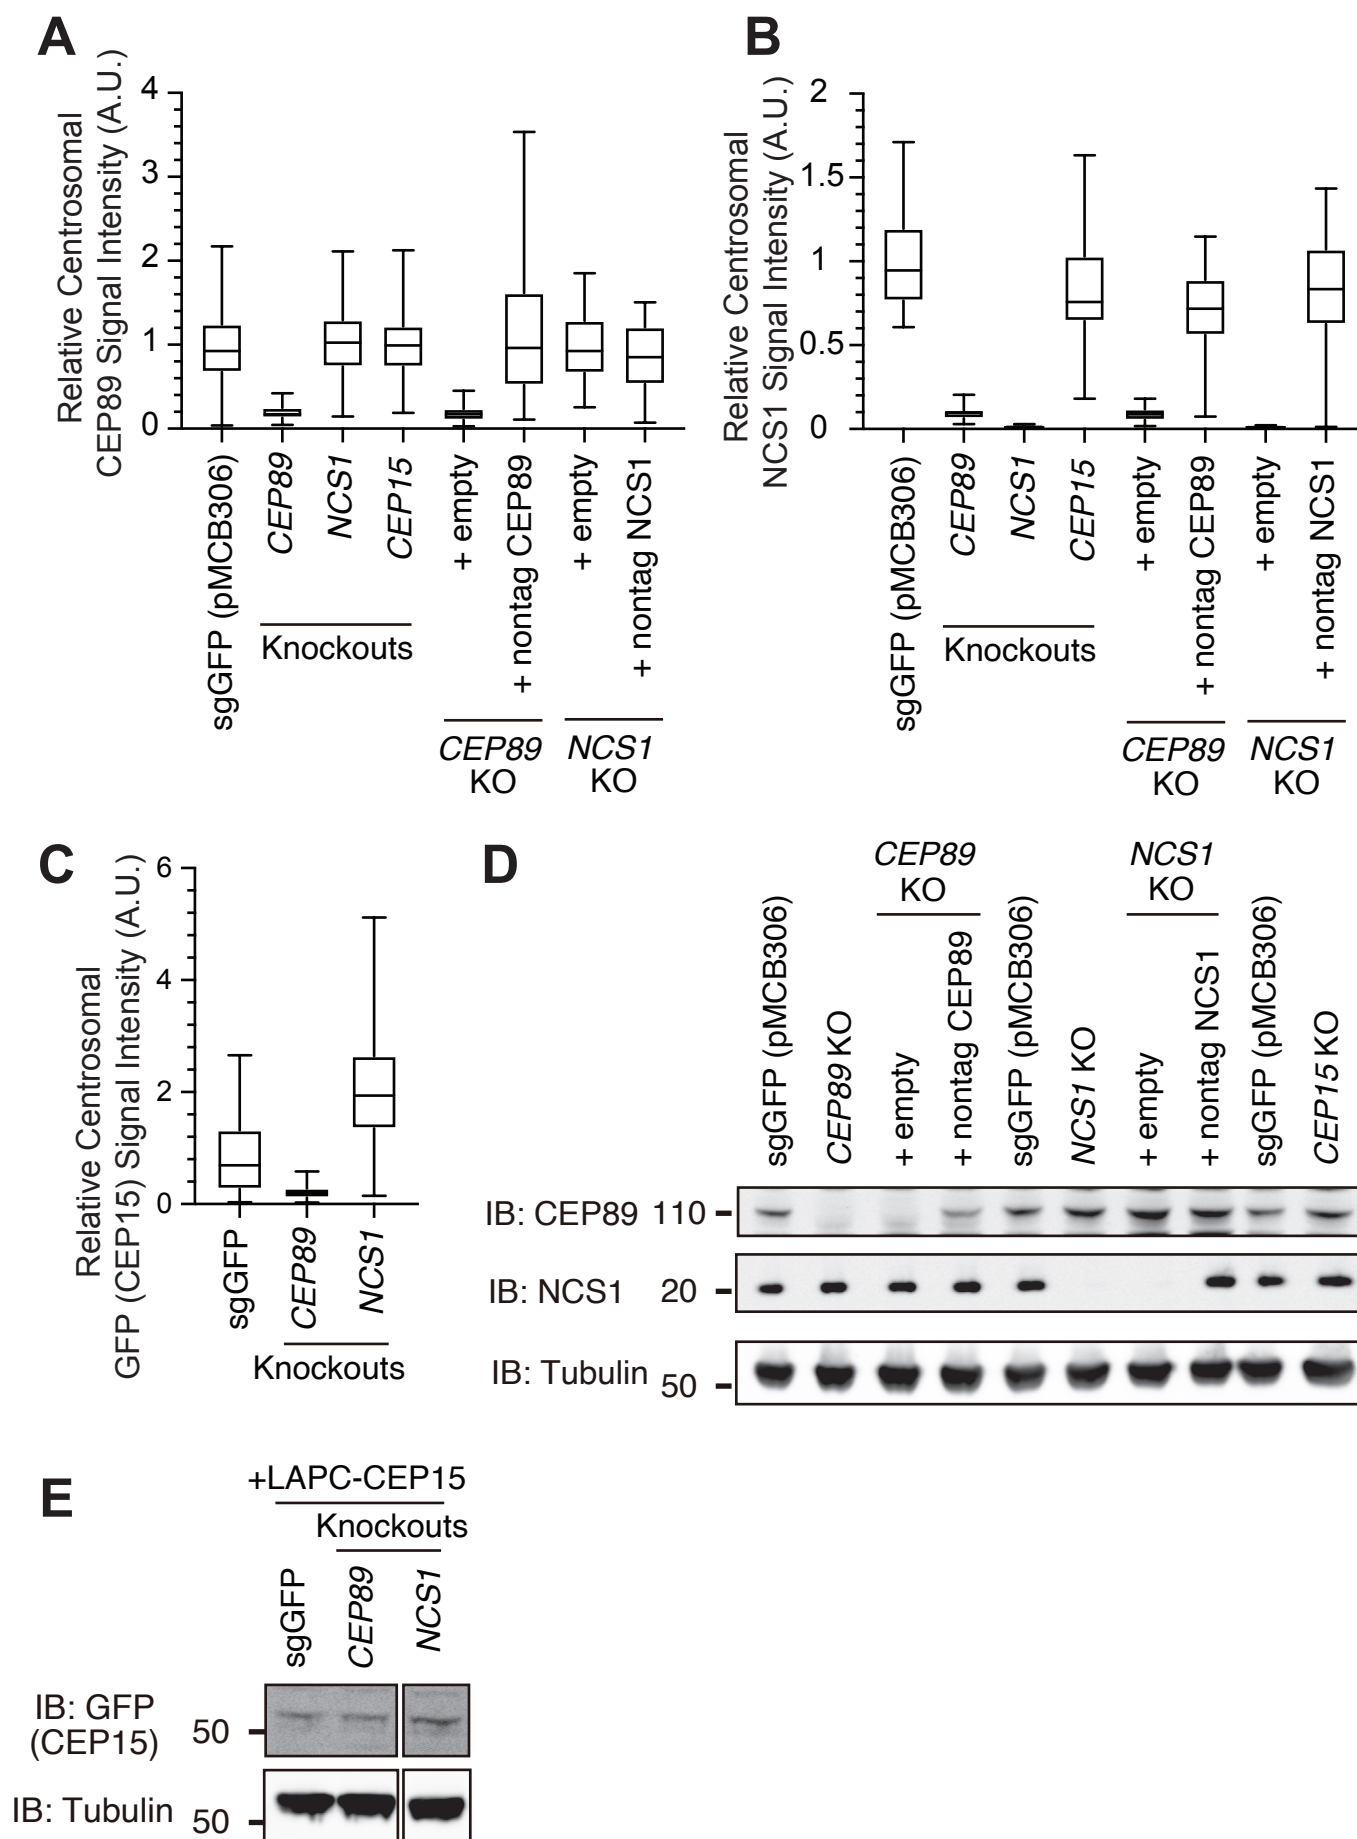

Supplement: supp [file elife_poa_e85998_Figure_2_figure_supplement_2.pdf › elife_poa_e85998_Figure_2_figure_supplement_2.pdf]

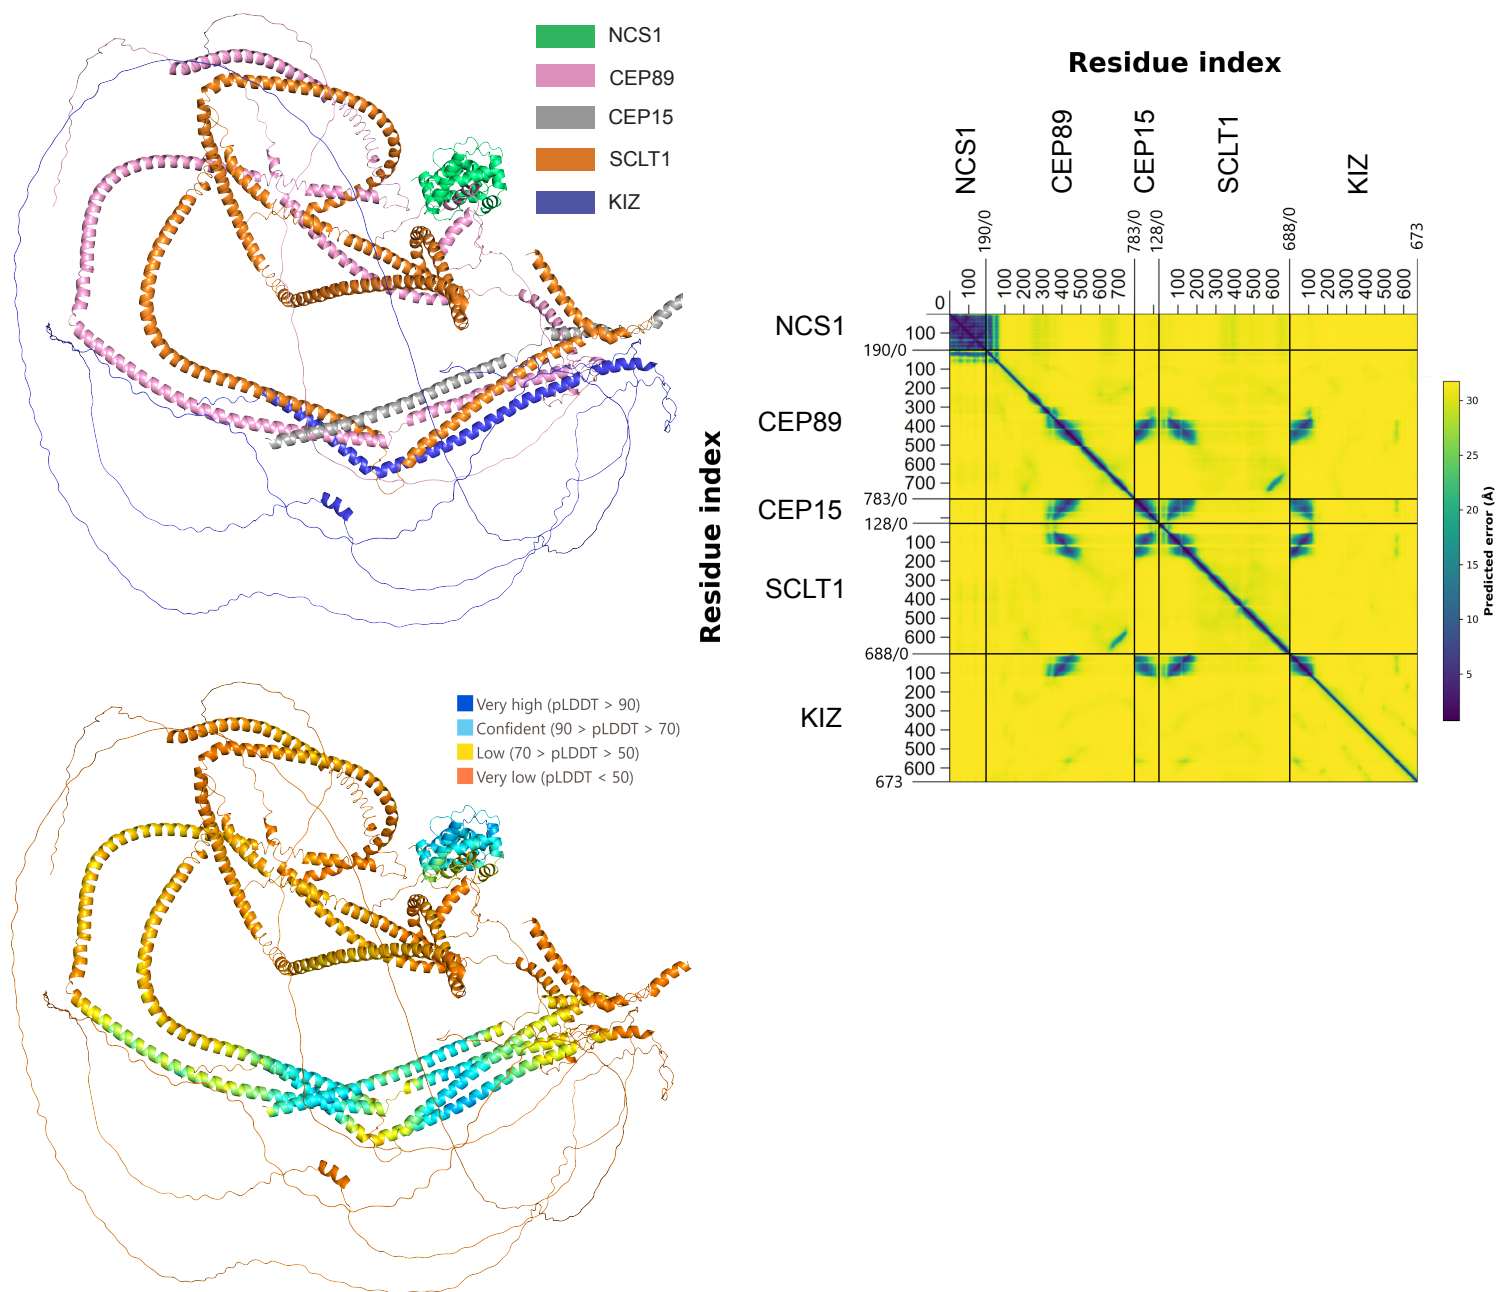

Kanie et al., Figure 2-figure supplement 3

Supplement: supp [file elife_poa_e85998_Figure_2_figure_supplement_3.pdf › elife_poa_e85998_Figure_2_figure_supplement_3.pdf]

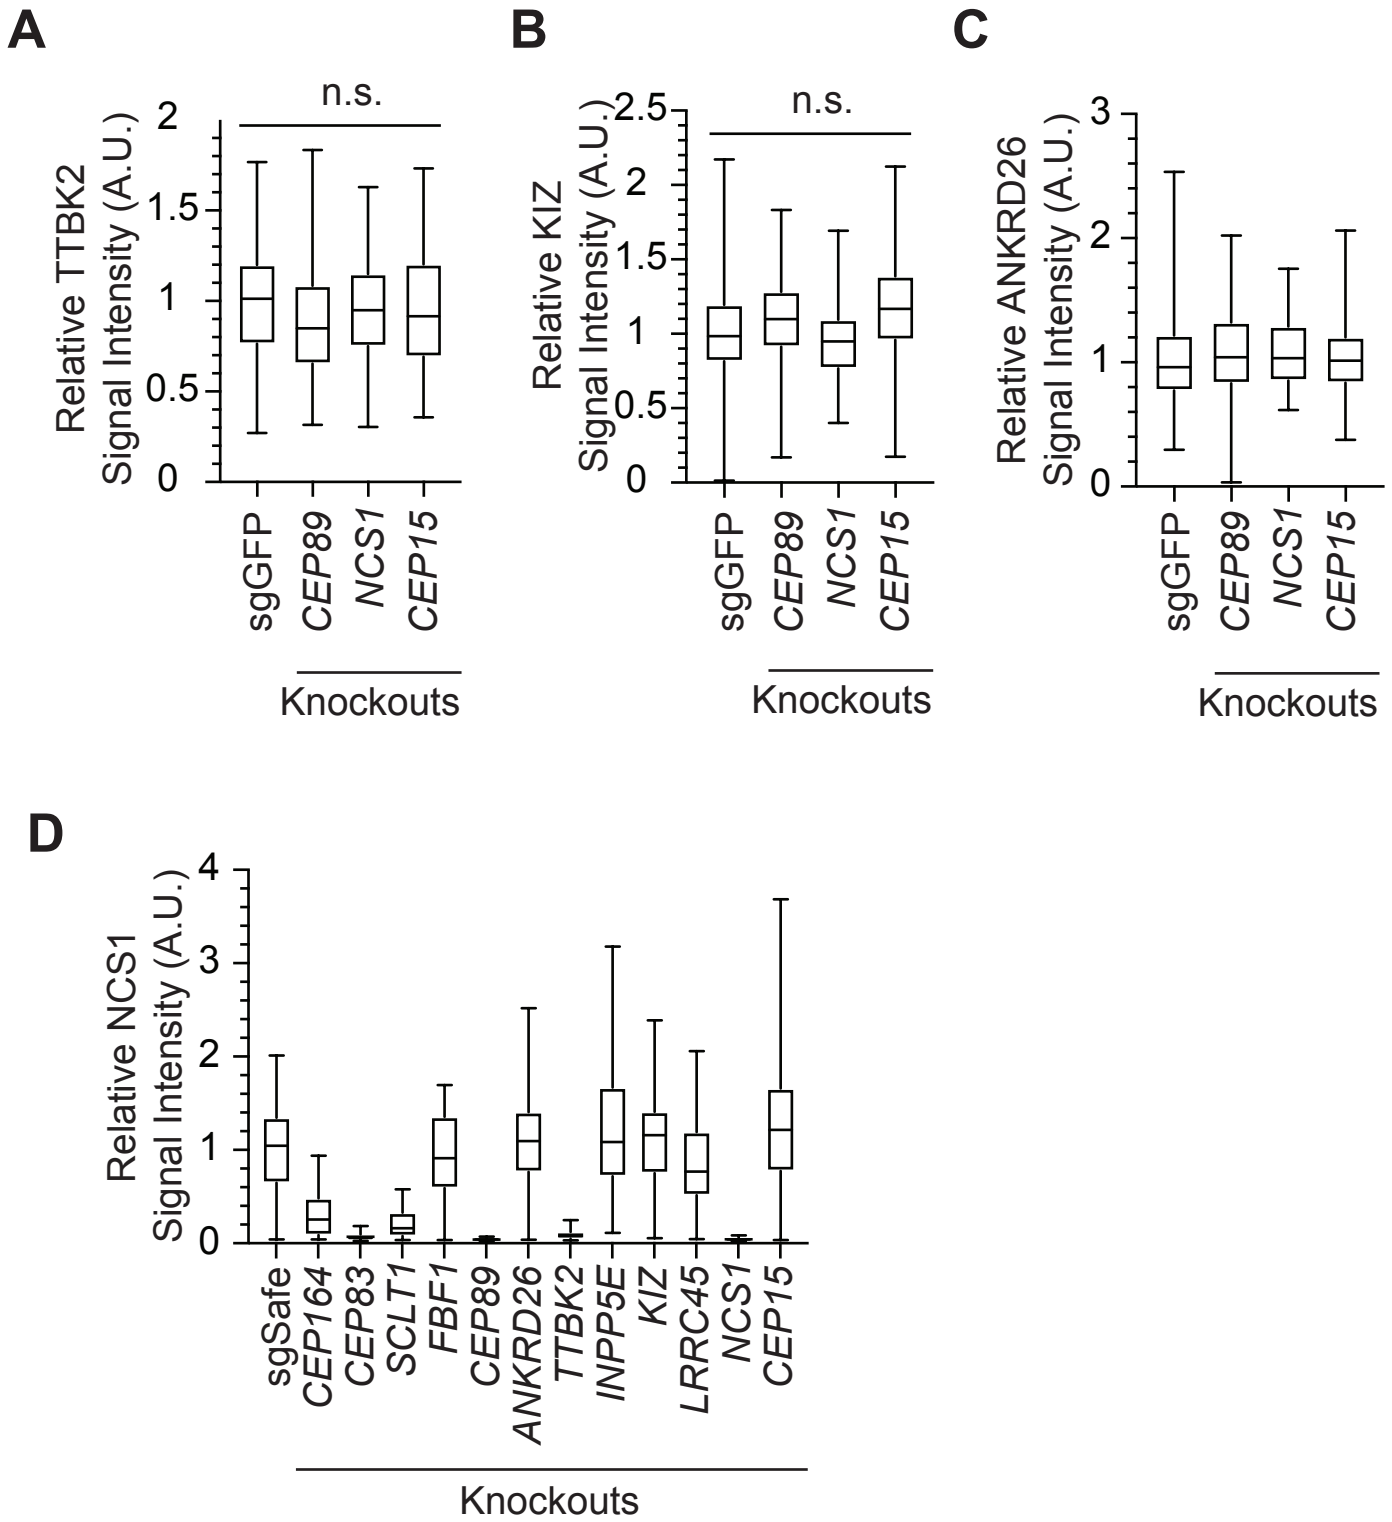

Supplement: supp [file elife_poa_e85998_Figure_2_figure_supplement_4.pdf › elife_poa_e85998_Figure_2_figure_supplement_4.pdf]

**A**

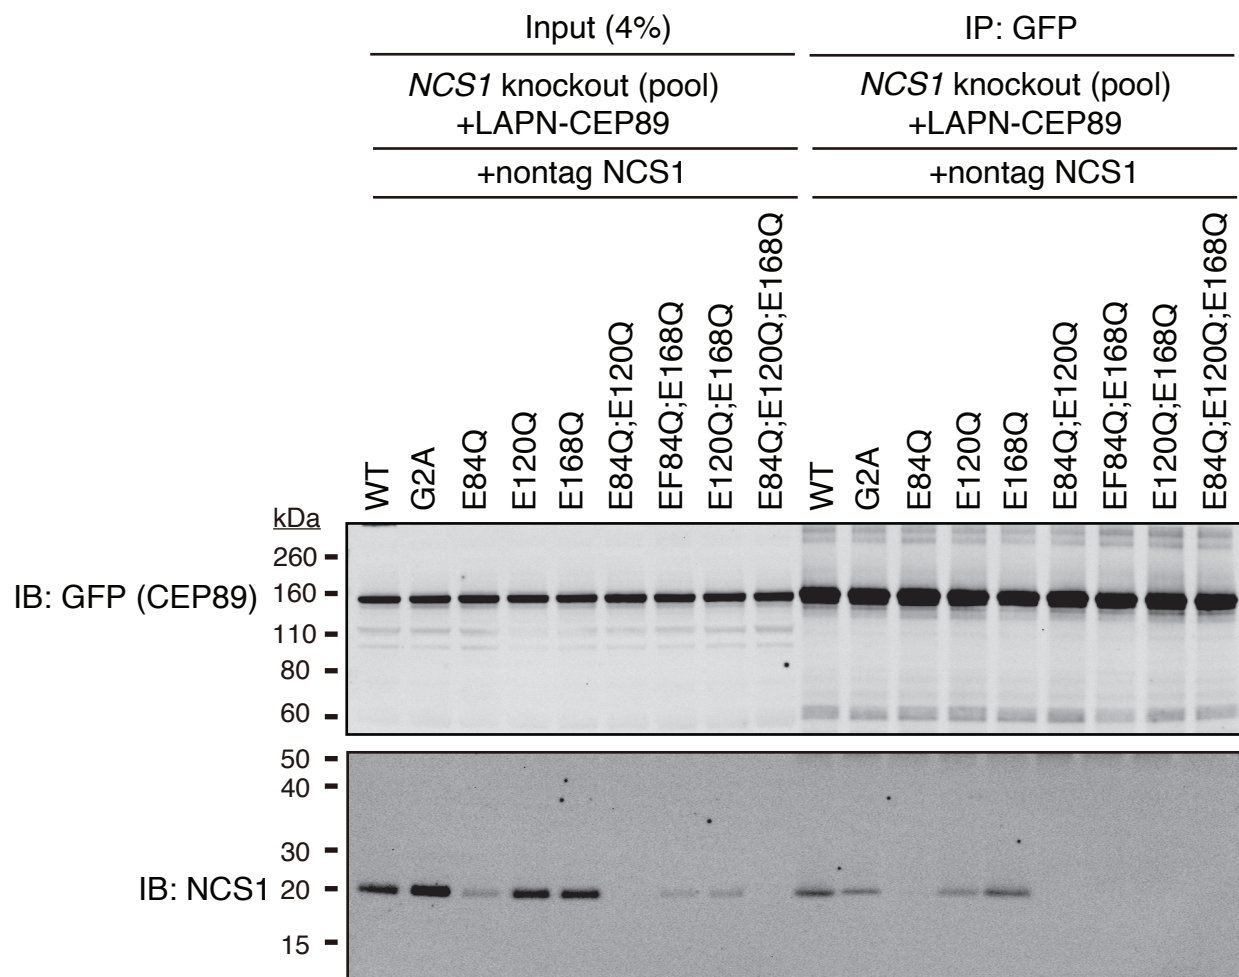

**B**

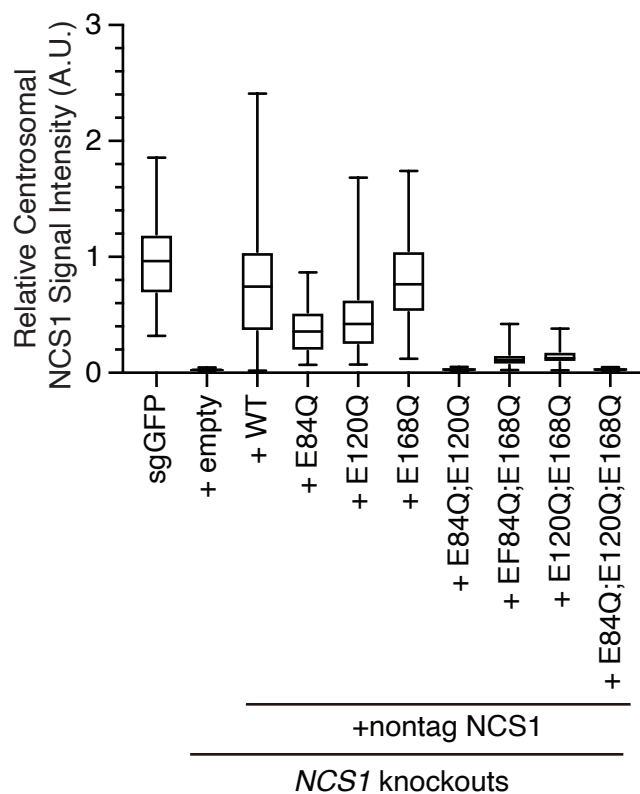

**C**

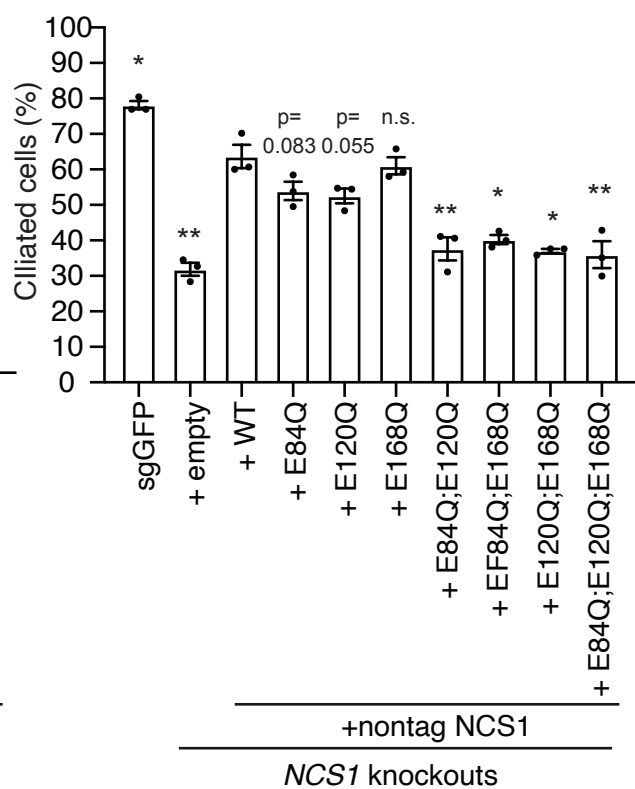

Supplement: supp [file elife_poa_e85998_Figure_5_figure_supplement_1.pdf › elife_poa_e85998_Figure_5_figure_supplement_1.pdf]

**A**

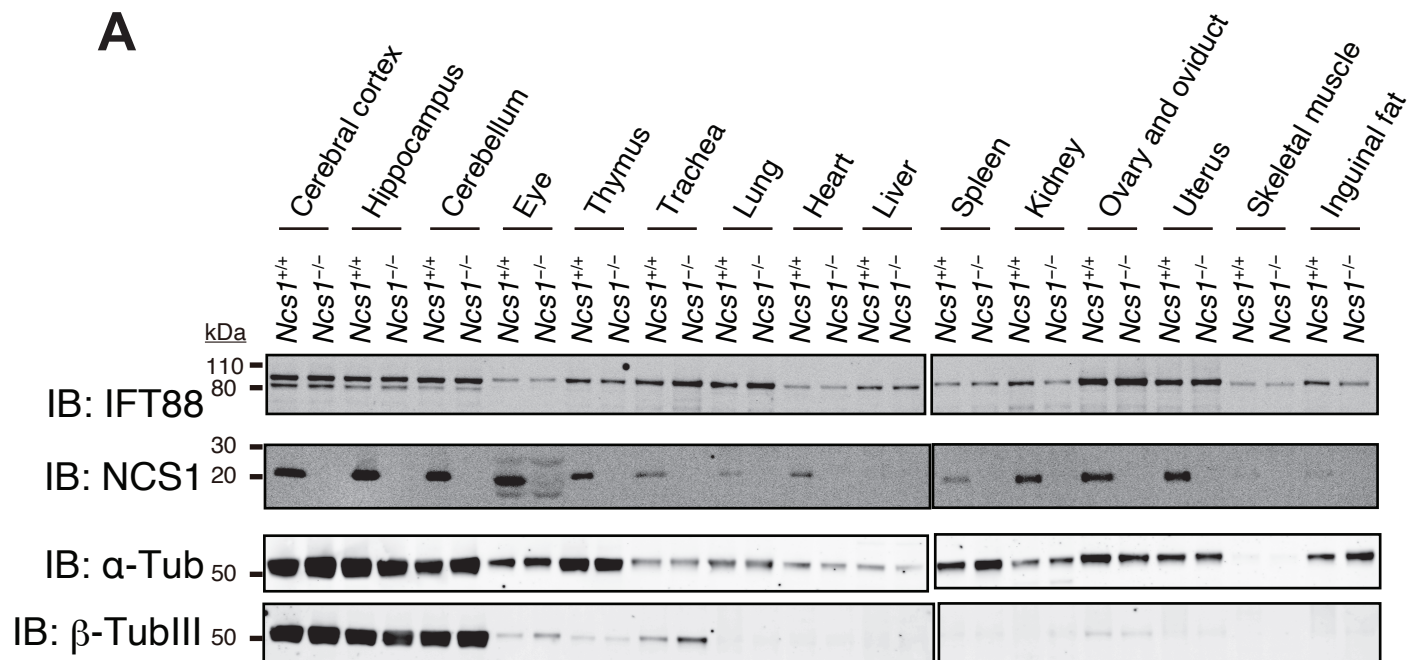

Kanie et al., Figure 7-figure supplement 1

Supplement: supp [file elife_poa_e85998_Figure_7_figure_supplement_1.pdf › elife_poa_e85998_Figure_7_figure_supplement_1.pdf]

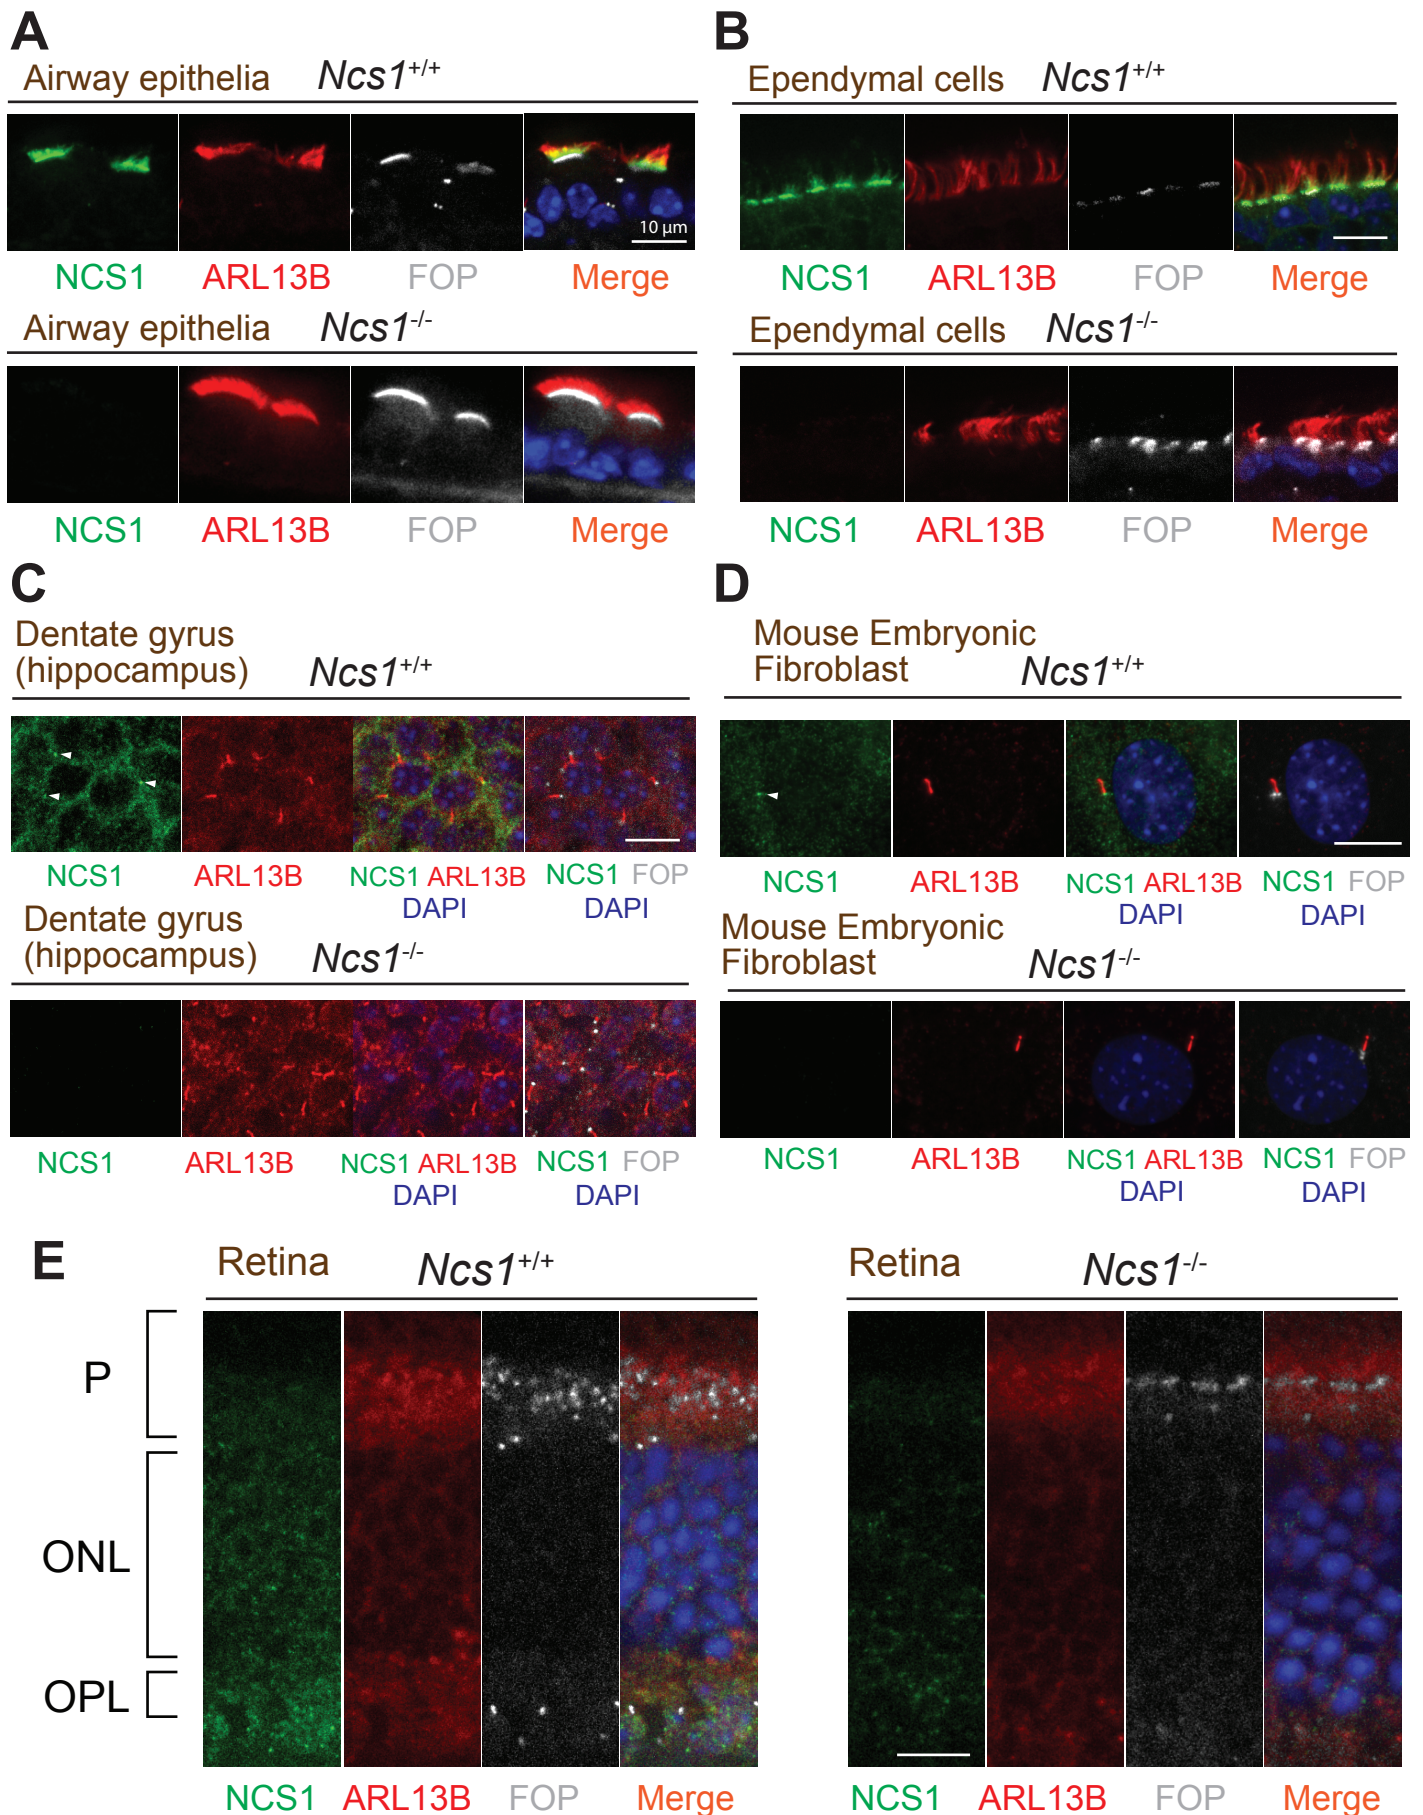

Supplement: supp [file elife_poa_e85998_Figure_7_figure_supplement_2.pdf › elife_poa_e85998_Figure_7_figure_supplement_2.pdf]

**A**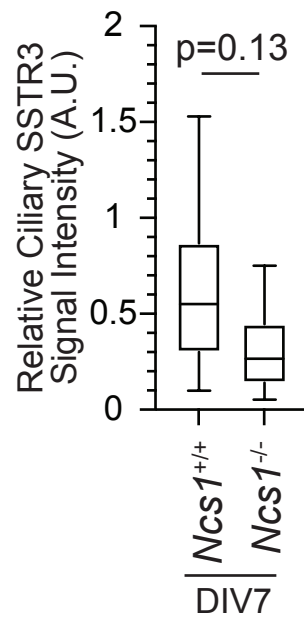**B**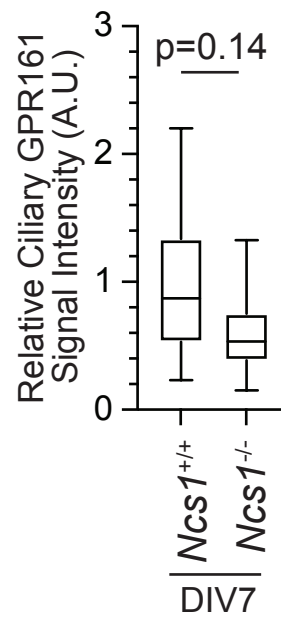

Kanie et al., Fig.7- figure supplement 3

Supplement: supp [file elife_poa_e85998_Figure_7_figure_supplement_3.pdf › elife_poa_e85998_Figure_7_figure_supplement_3.pdf]
